# Supplementary material for: Bifurcations of a New Fractional-Order System with a One-Scroll Chaotic Attractor
Source: Hindawi journal article supplement (doi:10.1155/2019/8341514), 2019-01-01
Supplement: f1 [file 8341514.f1.zip]

Archive with 15 entries (12 files):
- 8341514.f1/
- 8341514.f1/a-bifurcationdata/
- 8341514.f1/a-bifurcationdata/adataq093.dat
- 8341514.f1/a-bifurcationdata/adataq094.dat
- 8341514.f1/a-bifurcationdata/adataq095.dat
- 8341514.f1/a-bifurcationdata/adataq096.dat
- 8341514.f1/a-bifurcationdata/adataq097.dat
- 8341514.f1/a-bifurcationdata/adataq098.dat
- 8341514.f1/q1-bifurcationdata/
- 8341514.f1/q1-bifurcationdata/q1dataq093.dat
- 8341514.f1/q1-bifurcationdata/q1dataq094.dat
- 8341514.f1/q1-bifurcationdata/q1dataq095.dat
- 8341514.f1/q1-bifurcationdata/q1dataq096.dat
- 8341514.f1/q1-bifurcationdata/q1dataq097.dat
- 8341514.f1/q1-bifurcationdata/q1dataq098.dat
