# Supplementary material for: Bifurcations of a New Fractional-Order System with a One-Scroll Chaotic Attractor
Source: Hindawi journal article supplement (doi:10.1155/2019/8341514), 2019-01-01
Supplement: f1 [file 8341514.f1.zip › 8341514.f1/a-bifurcationdata/adataq093.dat]

  0.10000000   0.00000202
  0.10000000   0.00000159
  0.10000000   0.00000132
  0.10000000   0.00000114
  0.10000000   0.00000102
  0.10000000   0.00000092
  0.10000000   0.00000085
  0.10000000   0.00000079
  0.10000000   0.00000074
  0.10020000   0.00000203
  0.10020000   0.00000160
  0.10020000   0.00000132
  0.10020000   0.00000114
  0.10020000   0.00000102
  0.10020000   0.00000092
  0.10020000   0.00000085
  0.10020000   0.00000079
  0.10020000   0.00000074
  0.10040000   0.00000204
  0.10040000   0.00000160
  0.10040000   0.00000133
  0.10040000   0.00000114
  0.10040000   0.00000102
  0.10040000   0.00000092
  0.10040000   0.00000085
  0.10040000   0.00000079
  0.10040000   0.00000074
  0.10060000   0.00000206
  0.10060000   0.00000161
  0.10060000   0.00000133
  0.10060000   0.00000115
  0.10060000   0.00000102
  0.10060000   0.00000092
  0.10060000   0.00000085
  0.10060000   0.00000079
  0.10060000   0.00000074
  0.10080000   0.00000207
  0.10080000   0.00000162
  0.10080000   0.00000134
  0.10080000   0.00000115
  0.10080000   0.00000102
  0.10080000   0.00000092
  0.10080000   0.00000085
  0.10080000   0.00000079
  0.10080000   0.00000074
  0.10100000   0.00000208
  0.10100000   0.00000163
  0.10100000   0.00000134
  0.10100000   0.00000115
  0.10100000   0.00000102
  0.10100000   0.00000093
  0.10100000   0.00000085
  0.10100000   0.00000079
  0.10100000   0.00000074
  0.10120000   0.00000210
  0.10120000   0.00000163
  0.10120000   0.00000134
  0.10120000   0.00000115
  0.10120000   0.00000102
  0.10120000   0.00000093
  0.10120000   0.00000085
  0.10120000   0.00000079
  0.10120000   0.00000074
  0.10140000   0.00000211
  0.10140000   0.00000164
  0.10140000   0.00000135
  0.10140000   0.00000116
  0.10140000   0.00000102
  0.10140000   0.00000093
  0.10140000   0.00000085
  0.10140000   0.00000079
  0.10140000   0.00000074
  0.10160000   0.00000212
  0.10160000   0.00000165
  0.10160000   0.00000135
  0.10160000   0.00000116
  0.10160000   0.00000102
  0.10160000   0.00000093
  0.10160000   0.00000085
  0.10160000   0.00000079
  0.10160000   0.00000074
  0.10160000   0.00000070
  0.10180000   0.00000214
  0.10180000   0.00000166
  0.10180000   0.00000136
  0.10180000   0.00000116
  0.10180000   0.00000103
  0.10180000   0.00000093
  0.10180000   0.00000085
  0.10180000   0.00000079
  0.10180000   0.00000074
  0.10180000   0.00000070
  0.10200000   0.00000215
  0.10200000   0.00000167
  0.10200000   0.00000136
  0.10200000   0.00000116
  0.10200000   0.00000103
  0.10200000   0.00000093
  0.10200000   0.00000085
  0.10200000   0.00000079
  0.10200000   0.00000074
  0.10200000   0.00000070
  0.10220000   0.00000217
  0.10220000   0.00000168
  0.10220000   0.00000137
  0.10220000   0.00000117
  0.10220000   0.00000103
  0.10220000   0.00000093
  0.10220000   0.00000085
  0.10220000   0.00000079
  0.10220000   0.00000074
  0.10220000   0.00000070
  0.10240000   0.00000218
  0.10240000   0.00000168
  0.10240000   0.00000137
  0.10240000   0.00000117
  0.10240000   0.00000103
  0.10240000   0.00000093
  0.10240000   0.00000085
  0.10240000   0.00000079
  0.10240000   0.00000074
  0.10240000   0.00000070
  0.10260000   0.00000220
  0.10260000   0.00000169
  0.10260000   0.00000138
  0.10260000   0.00000117
  0.10260000   0.00000103
  0.10260000   0.00000093
  0.10260000   0.00000085
  0.10260000   0.00000079
  0.10260000   0.00000074
  0.10260000   0.00000070
  0.10280000   0.00000221
  0.10280000   0.00000170
  0.10280000   0.00000138
  0.10280000   0.00000117
  0.10280000   0.00000103
  0.10280000   0.00000093
  0.10280000   0.00000085
  0.10280000   0.00000079
  0.10280000   0.00000074
  0.10280000   0.00000070
  0.10300000   0.00000223
  0.10300000   0.00000171
  0.10300000   0.00000139
  0.10300000   0.00000118
  0.10300000   0.00000103
  0.10300000   0.00000093
  0.10300000   0.00000085
  0.10300000   0.00000079
  0.10300000   0.00000074
  0.10300000   0.00000070
  0.10320000   0.00000225
  0.10320000   0.00000172
  0.10320000   0.00000139
  0.10320000   0.00000118
  0.10320000   0.00000104
  0.10320000   0.00000093
  0.10320000   0.00000085
  0.10320000   0.00000079
  0.10320000   0.00000074
  0.10320000   0.00000070
  0.10340000   0.00000226
  0.10340000   0.00000173
  0.10340000   0.00000140
  0.10340000   0.00000118
  0.10340000   0.00000104
  0.10340000   0.00000093
  0.10340000   0.00000085
  0.10340000   0.00000079
  0.10340000   0.00000074
  0.10340000   0.00000070
  0.10360000   0.00000228
  0.10360000   0.00000174
  0.10360000   0.00000140
  0.10360000   0.00000119
  0.10360000   0.00000104
  0.10360000   0.00000093
  0.10360000   0.00000085
  0.10360000   0.00000079
  0.10360000   0.00000074
  0.10360000   0.00000070
  0.10380000   0.00000230
  0.10380000   0.00000175
  0.10380000   0.00000141
  0.10380000   0.00000119
  0.10380000   0.00000104
  0.10380000   0.00000093
  0.10380000   0.00000085
  0.10380000   0.00000079
  0.10380000   0.00000074
  0.10380000   0.00000070
  0.10400000   0.00000231
  0.10400000   0.00000176
  0.10400000   0.00000142
  0.10400000   0.00000119
  0.10400000   0.00000104
  0.10400000   0.00000094
  0.10400000   0.00000085
  0.10400000   0.00000079
  0.10400000   0.00000074
  0.10400000   0.00000069
  0.10420000   0.00000233
  0.10420000   0.00000177
  0.10420000   0.00000142
  0.10420000   0.00000120
  0.10420000   0.00000104
  0.10420000   0.00000094
  0.10420000   0.00000086
  0.10420000   0.00000079
  0.10420000   0.00000074
  0.10420000   0.00000069
  0.10440000   0.00000235
  0.10440000   0.00000178
  0.10440000   0.00000143
  0.10440000   0.00000120
  0.10440000   0.00000105
  0.10440000   0.00000094
  0.10440000   0.00000086
  0.10440000   0.00000079
  0.10440000   0.00000074
  0.10440000   0.00000069
  0.10460000   0.00000237
  0.10460000   0.00000179
  0.10460000   0.00000143
  0.10460000   0.00000120
  0.10460000   0.00000105
  0.10460000   0.00000094
  0.10460000   0.00000086
  0.10460000   0.00000079
  0.10460000   0.00000074
  0.10460000   0.00000069
  0.10480000   0.00000239
  0.10480000   0.00000180
  0.10480000   0.00000144
  0.10480000   0.00000121
  0.10480000   0.00000105
  0.10480000   0.00000094
  0.10480000   0.00000086
  0.10480000   0.00000079
  0.10480000   0.00000074
  0.10480000   0.00000069
  0.10500000   0.00000240
  0.10500000   0.00000181
  0.10500000   0.00000145
  0.10500000   0.00000121
  0.10500000   0.00000105
  0.10500000   0.00000094
  0.10500000   0.00000086
  0.10500000   0.00000079
  0.10500000   0.00000074
  0.10500000   0.00000069
  0.10520000   0.00000242
  0.10520000   0.00000182
  0.10520000   0.00000145
  0.10520000   0.00000121
  0.10520000   0.00000105
  0.10520000   0.00000094
  0.10520000   0.00000086
  0.10520000   0.00000079
  0.10520000   0.00000074
  0.10520000   0.00000069
  0.10540000   0.00000244
  0.10540000   0.00000184
  0.10540000   0.00000146
  0.10540000   0.00000122
  0.10540000   0.00000106
  0.10540000   0.00000094
  0.10540000   0.00000086
  0.10540000   0.00000079
  0.10540000   0.00000074
  0.10540000   0.00000069
  0.10560000   0.00000246
  0.10560000   0.00000185
  0.10560000   0.00000147
  0.10560000   0.00000122
  0.10560000   0.00000106
  0.10560000   0.00000094
  0.10560000   0.00000086
  0.10560000   0.00000079
  0.10560000   0.00000074
  0.10560000   0.00000069
  0.10560000   0.00000065
  0.10580000   0.00000248
  0.10580000   0.00000186
  0.10580000   0.00000147
  0.10580000   0.00000123
  0.10580000   0.00000106
  0.10580000   0.00000094
  0.10580000   0.00000086
  0.10580000   0.00000079
  0.10580000   0.00000074
  0.10580000   0.00000069
  0.10580000   0.00000065
  0.10600000   0.00000250
  0.10600000   0.00000187
  0.10600000   0.00000148
  0.10600000   0.00000123
  0.10600000   0.00000106
  0.10600000   0.00000095
  0.10600000   0.00000086
  0.10600000   0.00000079
  0.10600000   0.00000074
  0.10600000   0.00000069
  0.10600000   0.00000065
  0.10620000   0.00000252
  0.10620000   0.00000188
  0.10620000   0.00000149
  0.10620000   0.00000123
  0.10620000   0.00000106
  0.10620000   0.00000095
  0.10620000   0.00000086
  0.10620000   0.00000079
  0.10620000   0.00000074
  0.10620000   0.00000069
  0.10620000   0.00000065
  0.10640000   0.00000255
  0.10640000   0.00000190
  0.10640000   0.00000150
  0.10640000   0.00000124
  0.10640000   0.00000107
  0.10640000   0.00000095
  0.10640000   0.00000086
  0.10640000   0.00000079
  0.10640000   0.00000074
  0.10640000   0.00000069
  0.10640000   0.00000065
  0.10660000   0.00000257
  0.10660000   0.00000191
  0.10660000   0.00000150
  0.10660000   0.00000124
  0.10660000   0.00000107
  0.10660000   0.00000095
  0.10660000   0.00000086
  0.10660000   0.00000079
  0.10660000   0.00000074
  0.10660000   0.00000069
  0.10660000   0.00000065
  0.10680000   0.00000259
  0.10680000   0.00000192
  0.10680000   0.00000151
  0.10680000   0.00000125
  0.10680000   0.00000107
  0.10680000   0.00000095
  0.10680000   0.00000086
  0.10680000   0.00000079
  0.10680000   0.00000074
  0.10680000   0.00000069
  0.10680000   0.00000065
  0.10700000   0.00000261
  0.10700000   0.00000194
  0.10700000   0.00000152
  0.10700000   0.00000125
  0.10700000   0.00000107
  0.10700000   0.00000095
  0.10700000   0.00000086
  0.10700000   0.00000079
  0.10700000   0.00000074
  0.10700000   0.00000069
  0.10700000   0.00000065
  0.10720000   0.00000263
  0.10720000   0.00000195
  0.10720000   0.00000153
  0.10720000   0.00000126
  0.10720000   0.00000108
  0.10720000   0.00000095
  0.10720000   0.00000086
  0.10720000   0.00000079
  0.10720000   0.00000074
  0.10720000   0.00000069
  0.10720000   0.00000065
  0.10740000   0.00000266
  0.10740000   0.00000196
  0.10740000   0.00000153
  0.10740000   0.00000126
  0.10740000   0.00000108
  0.10740000   0.00000095
  0.10740000   0.00000086
  0.10740000   0.00000079
  0.10740000   0.00000074
  0.10740000   0.00000069
  0.10740000   0.00000065
  0.10760000   0.00000268
  0.10760000   0.00000198
  0.10760000   0.00000154
  0.10760000   0.00000127
  0.10760000   0.00000108
  0.10760000   0.00000096
  0.10760000   0.00000086
  0.10760000   0.00000079
  0.10760000   0.00000074
  0.10760000   0.00000069
  0.10760000   0.00000065
  0.10780000   0.00000271
  0.10780000   0.00000199
  0.10780000   0.00000155
  0.10780000   0.00000127
  0.10780000   0.00000108
  0.10780000   0.00000096
  0.10780000   0.00000086
  0.10780000   0.00000079
  0.10780000   0.00000074
  0.10780000   0.00000069
  0.10780000   0.00000065
  0.10800000   0.00000273
  0.10800000   0.00000201
  0.10800000   0.00000156
  0.10800000   0.00000127
  0.10800000   0.00000109
  0.10800000   0.00000096
  0.10800000   0.00000087
  0.10800000   0.00000079
  0.10800000   0.00000074
  0.10800000   0.00000069
  0.10800000   0.00000065
  0.10820000   0.00000276
  0.10820000   0.00000202
  0.10820000   0.00000157
  0.10820000   0.00000128
  0.10820000   0.00000109
  0.10820000   0.00000096
  0.10820000   0.00000087
  0.10820000   0.00000079
  0.10820000   0.00000074
  0.10820000   0.00000069
  0.10820000   0.00000065
  0.10840000   0.00000278
  0.10840000   0.00000204
  0.10840000   0.00000158
  0.10840000   0.00000129
  0.10840000   0.00000109
  0.10840000   0.00000096
  0.10840000   0.00000087
  0.10840000   0.00000079
  0.10840000   0.00000074
  0.10840000   0.00000069
  0.10840000   0.00000065
  0.10860000   0.00000281
  0.10860000   0.00000205
  0.10860000   0.00000159
  0.10860000   0.00000129
  0.10860000   0.00000110
  0.10860000   0.00000096
  0.10860000   0.00000087
  0.10860000   0.00000080
  0.10860000   0.00000074
  0.10860000   0.00000069
  0.10860000   0.00000065
  0.10880000   0.00000283
  0.10880000   0.00000207
  0.10880000   0.00000160
  0.10880000   0.00000130
  0.10880000   0.00000110
  0.10880000   0.00000097
  0.10880000   0.00000087
  0.10880000   0.00000080
  0.10880000   0.00000074
  0.10880000   0.00000069
  0.10880000   0.00000065
  0.10900000   0.00000286
  0.10900000   0.00000208
  0.10900000   0.00000160
  0.10900000   0.00000130
  0.10900000   0.00000110
  0.10900000   0.00000097
  0.10900000   0.00000087
  0.10900000   0.00000080
  0.10900000   0.00000074
  0.10900000   0.00000069
  0.10900000   0.00000065
  0.10920000   0.00000289
  0.10920000   0.00000210
  0.10920000   0.00000161
  0.10920000   0.00000131
  0.10920000   0.00000111
  0.10920000   0.00000097
  0.10920000   0.00000087
  0.10920000   0.00000080
  0.10920000   0.00000074
  0.10920000   0.00000069
  0.10920000   0.00000065
  0.10940000   0.00000291
  0.10940000   0.00000212
  0.10940000   0.00000162
  0.10940000   0.00000131
  0.10940000   0.00000111
  0.10940000   0.00000097
  0.10940000   0.00000087
  0.10940000   0.00000080
  0.10940000   0.00000074
  0.10940000   0.00000069
  0.10940000   0.00000065
  0.10940000   0.00000061
  0.10960000   0.00000294
  0.10960000   0.00000213
  0.10960000   0.00000163
  0.10960000   0.00000132
  0.10960000   0.00000111
  0.10960000   0.00000097
  0.10960000   0.00000087
  0.10960000   0.00000080
  0.10960000   0.00000074
  0.10960000   0.00000069
  0.10960000   0.00000065
  0.10960000   0.00000061
  0.10980000   0.00000297
  0.10980000   0.00000215
  0.10980000   0.00000164
  0.10980000   0.00000132
  0.10980000   0.00000112
  0.10980000   0.00000097
  0.10980000   0.00000087
  0.10980000   0.00000080
  0.10980000   0.00000074
  0.10980000   0.00000069
  0.10980000   0.00000065
  0.10980000   0.00000061
  0.11000000   0.00000300
  0.11000000   0.00000217
  0.11000000   0.00000165
  0.11000000   0.00000133
  0.11000000   0.00000112
  0.11000000   0.00000098
  0.11000000   0.00000087
  0.11000000   0.00000080
  0.11000000   0.00000074
  0.11000000   0.00000069
  0.11000000   0.00000065
  0.11000000   0.00000061
  0.11020000   0.00000303
  0.11020000   0.00000219
  0.11020000   0.00000167
  0.11020000   0.00000134
  0.11020000   0.00000112
  0.11020000   0.00000098
  0.11020000   0.00000088
  0.11020000   0.00000080
  0.11020000   0.00000074
  0.11020000   0.00000069
  0.11020000   0.00000065
  0.11020000   0.00000061
  0.11040000   0.00000306
  0.11040000   0.00000220
  0.11040000   0.00000168
  0.11040000   0.00000134
  0.11040000   0.00000113
  0.11040000   0.00000098
  0.11040000   0.00000088
  0.11040000   0.00000080
  0.11040000   0.00000074
  0.11040000   0.00000069
  0.11040000   0.00000065
  0.11040000   0.00000061
  0.11060000   0.00000309
  0.11060000   0.00000222
  0.11060000   0.00000169
  0.11060000   0.00000135
  0.11060000   0.00000113
  0.11060000   0.00000098
  0.11060000   0.00000088
  0.11060000   0.00000080
  0.11060000   0.00000074
  0.11060000   0.00000069
  0.11060000   0.00000065
  0.11060000   0.00000061
  0.11080000   0.00000312
  0.11080000   0.00000224
  0.11080000   0.00000170
  0.11080000   0.00000136
  0.11080000   0.00000113
  0.11080000   0.00000098
  0.11080000   0.00000088
  0.11080000   0.00000080
  0.11080000   0.00000074
  0.11080000   0.00000069
  0.11080000   0.00000065
  0.11080000   0.00000061
  0.11100000   0.00000315
  0.11100000   0.00000226
  0.11100000   0.00000171
  0.11100000   0.00000136
  0.11100000   0.00000114
  0.11100000   0.00000099
  0.11100000   0.00000088
  0.11100000   0.00000080
  0.11100000   0.00000074
  0.11100000   0.00000069
  0.11100000   0.00000065
  0.11100000   0.00000061
  0.11120000   0.00000318
  0.11120000   0.00000228
  0.11120000   0.00000172
  0.11120000   0.00000137
  0.11120000   0.00000114
  0.11120000   0.00000099
  0.11120000   0.00000088
  0.11120000   0.00000080
  0.11120000   0.00000074
  0.11120000   0.00000069
  0.11120000   0.00000065
  0.11120000   0.00000061
  0.11140000   0.00000322
  0.11140000   0.00000230
  0.11140000   0.00000173
  0.11140000   0.00000138
  0.11140000   0.00000115
  0.11140000   0.00000099
  0.11140000   0.00000088
  0.11140000   0.00000080
  0.11140000   0.00000074
  0.11140000   0.00000069
  0.11140000   0.00000065
  0.11140000   0.00000061
  0.11160000   0.00000325
  0.11160000   0.00000232
  0.11160000   0.00000175
  0.11160000   0.00000138
  0.11160000   0.00000115
  0.11160000   0.00000099
  0.11160000   0.00000088
  0.11160000   0.00000080
  0.11160000   0.00000074
  0.11160000   0.00000069
  0.11160000   0.00000065
  0.11160000   0.00000061
  0.11180000   0.00000328
  0.11180000   0.00000234
  0.11180000   0.00000176
  0.11180000   0.00000139
  0.11180000   0.00000115
  0.11180000   0.00000100
  0.11180000   0.00000088
  0.11180000   0.00000080
  0.11180000   0.00000074
  0.11180000   0.00000069
  0.11180000   0.00000065
  0.11180000   0.00000061
  0.11200000   0.00000332
  0.11200000   0.00000236
  0.11200000   0.00000177
  0.11200000   0.00000140
  0.11200000   0.00000116
  0.11200000   0.00000100
  0.11200000   0.00000089
  0.11200000   0.00000080
  0.11200000   0.00000074
  0.11200000   0.00000069
  0.11200000   0.00000065
  0.11200000   0.00000061
  0.11220000   0.00000335
  0.11220000   0.00000238
  0.11220000   0.00000178
  0.11220000   0.00000141
  0.11220000   0.00000116
  0.11220000   0.00000100
  0.11220000   0.00000089
  0.11220000   0.00000080
  0.11220000   0.00000074
  0.11220000   0.00000069
  0.11220000   0.00000065
  0.11220000   0.00000061
  0.11240000   0.00000339
  0.11240000   0.00000240
  0.11240000   0.00000180
  0.11240000   0.00000141
  0.11240000   0.00000117
  0.11240000   0.00000100
  0.11240000   0.00000089
  0.11240000   0.00000081
  0.11240000   0.00000074
  0.11240000   0.00000069
  0.11240000   0.00000065
  0.11240000   0.00000061
  0.11260000   0.00000343
  0.11260000   0.00000242
  0.11260000   0.00000181
  0.11260000   0.00000142
  0.11260000   0.00000117
  0.11260000   0.00000101
  0.11260000   0.00000089
  0.11260000   0.00000081
  0.11260000   0.00000074
  0.11260000   0.00000069
  0.11260000   0.00000065
  0.11260000   0.00000061
  0.11280000   0.00000346
  0.11280000   0.00000245
  0.11280000   0.00000182
  0.11280000   0.00000143
  0.11280000   0.00000118
  0.11280000   0.00000101
  0.11280000   0.00000089
  0.11280000   0.00000081
  0.11280000   0.00000074
  0.11280000   0.00000069
  0.11280000   0.00000065
  0.11280000   0.00000061
  0.11300000   0.00000350
  0.11300000   0.00000247
  0.11300000   0.00000184
  0.11300000   0.00000144
  0.11300000   0.00000118
  0.11300000   0.00000101
  0.11300000   0.00000089
  0.11300000   0.00000081
  0.11300000   0.00000074
  0.11300000   0.00000069
  0.11300000   0.00000065
  0.11300000   0.00000061
  0.11300000   0.00000058
  0.11320000   0.00000354
  0.11320000   0.00000249
  0.11320000   0.00000185
  0.11320000   0.00000145
  0.11320000   0.00000119
  0.11320000   0.00000101
  0.11320000   0.00000090
  0.11320000   0.00000081
  0.11320000   0.00000074
  0.11320000   0.00000069
  0.11320000   0.00000065
  0.11320000   0.00000061
  0.11320000   0.00000058
  0.11340000   0.00000358
  0.11340000   0.00000252
  0.11340000   0.00000186
  0.11340000   0.00000146
  0.11340000   0.00000119
  0.11340000   0.00000102
  0.11340000   0.00000090
  0.11340000   0.00000081
  0.11340000   0.00000074
  0.11340000   0.00000069
  0.11340000   0.00000065
  0.11340000   0.00000061
  0.11340000   0.00000058
  0.11360000   0.00000362
  0.11360000   0.00000254
  0.11360000   0.00000188
  0.11360000   0.00000146
  0.11360000   0.00000120
  0.11360000   0.00000102
  0.11360000   0.00000090
  0.11360000   0.00000081
  0.11360000   0.00000074
  0.11360000   0.00000069
  0.11360000   0.00000065
  0.11360000   0.00000061
  0.11360000   0.00000058
  0.11380000   0.00000366
  0.11380000   0.00000257
  0.11380000   0.00000189
  0.11380000   0.00000147
  0.11380000   0.00000120
  0.11380000   0.00000102
  0.11380000   0.00000090
  0.11380000   0.00000081
  0.11380000   0.00000074
  0.11380000   0.00000069
  0.11380000   0.00000065
  0.11380000   0.00000061
  0.11380000   0.00000058
  0.11400000   0.00000370
  0.11400000   0.00000259
  0.11400000   0.00000191
  0.11400000   0.00000148
  0.11400000   0.00000121
  0.11400000   0.00000103
  0.11400000   0.00000090
  0.11400000   0.00000081
  0.11400000   0.00000074
  0.11400000   0.00000069
  0.11400000   0.00000065
  0.11400000   0.00000061
  0.11400000   0.00000057
  0.11420000   0.00000374
  0.11420000   0.00000262
  0.11420000   0.00000192
  0.11420000   0.00000149
  0.11420000   0.00000121
  0.11420000   0.00000103
  0.11420000   0.00000090
  0.11420000   0.00000081
  0.11420000   0.00000074
  0.11420000   0.00000069
  0.11420000   0.00000065
  0.11420000   0.00000061
  0.11420000   0.00000057
  0.11440000   0.00000378
  0.11440000   0.00000264
  0.11440000   0.00000194
  0.11440000   0.00000150
  0.11440000   0.00000122
  0.11440000   0.00000103
  0.11440000   0.00000091
  0.11440000   0.00000081
  0.11440000   0.00000074
  0.11440000   0.00000069
  0.11440000   0.00000065
  0.11440000   0.00000061
  0.11440000   0.00000057
  0.11460000   0.00000382
  0.11460000   0.00000267
  0.11460000   0.00000196
  0.11460000   0.00000151
  0.11460000   0.00000123
  0.11460000   0.00000104
  0.11460000   0.00000091
  0.11460000   0.00000081
  0.11460000   0.00000074
  0.11460000   0.00000069
  0.11460000   0.00000065
  0.11460000   0.00000061
  0.11460000   0.00000057
  0.11480000   0.00000387
  0.11480000   0.00000269
  0.11480000   0.00000197
  0.11480000   0.00000152
  0.11480000   0.00000123
  0.11480000   0.00000104
  0.11480000   0.00000091
  0.11480000   0.00000082
  0.11480000   0.00000075
  0.11480000   0.00000069
  0.11480000   0.00000065
  0.11480000   0.00000061
  0.11480000   0.00000057
  0.11500000   0.00000391
  0.11500000   0.00000272
  0.11500000   0.00000199
  0.11500000   0.00000153
  0.11500000   0.00000124
  0.11500000   0.00000104
  0.11500000   0.00000091
  0.11500000   0.00000082
  0.11500000   0.00000075
  0.11500000   0.00000069
  0.11500000   0.00000064
  0.11500000   0.00000061
  0.11500000   0.00000057
  0.11520000   0.00000396
  0.11520000   0.00000275
  0.11520000   0.00000201
  0.11520000   0.00000154
  0.11520000   0.00000124
  0.11520000   0.00000105
  0.11520000   0.00000091
  0.11520000   0.00000082
  0.11520000   0.00000075
  0.11520000   0.00000069
  0.11520000   0.00000064
  0.11520000   0.00000061
  0.11520000   0.00000057
  0.11540000   0.00000400
  0.11540000   0.00000278
  0.11540000   0.00000202
  0.11540000   0.00000155
  0.11540000   0.00000125
  0.11540000   0.00000105
  0.11540000   0.00000092
  0.11540000   0.00000082
  0.11540000   0.00000075
  0.11540000   0.00000069
  0.11540000   0.00000064
  0.11540000   0.00000061
  0.11540000   0.00000057
  0.11560000   0.00000405
  0.11560000   0.00000281
  0.11560000   0.00000204
  0.11560000   0.00000156
  0.11560000   0.00000126
  0.11560000   0.00000106
  0.11560000   0.00000092
  0.11560000   0.00000082
  0.11560000   0.00000075
  0.11560000   0.00000069
  0.11560000   0.00000064
  0.11560000   0.00000061
  0.11560000   0.00000057
  0.11580000   0.00000410
  0.11580000   0.00000284
  0.11580000   0.00000206
  0.11580000   0.00000157
  0.11580000   0.00000126
  0.11580000   0.00000106
  0.11580000   0.00000092
  0.11580000   0.00000082
  0.11580000   0.00000075
  0.11580000   0.00000069
  0.11580000   0.00000064
  0.11580000   0.00000061
  0.11580000   0.00000057
  0.11600000   0.00000414
  0.11600000   0.00000287
  0.11600000   0.00000208
  0.11600000   0.00000158
  0.11600000   0.00000127
  0.11600000   0.00000106
  0.11600000   0.00000092
  0.11600000   0.00000082
  0.11600000   0.00000075
  0.11600000   0.00000069
  0.11600000   0.00000064
  0.11600000   0.00000061
  0.11600000   0.00000057
  0.11620000   0.00000419
  0.11620000   0.00000290
  0.11620000   0.00000210
  0.11620000   0.00000160
  0.11620000   0.00000128
  0.11620000   0.00000107
  0.11620000   0.00000092
  0.11620000   0.00000082
  0.11620000   0.00000075
  0.11620000   0.00000069
  0.11620000   0.00000065
  0.11620000   0.00000061
  0.11620000   0.00000057
  0.11640000   0.00000424
  0.11640000   0.00000293
  0.11640000   0.00000212
  0.11640000   0.00000161
  0.11640000   0.00000128
  0.11640000   0.00000107
  0.11640000   0.00000093
  0.11640000   0.00000083
  0.11640000   0.00000075
  0.11640000   0.00000069
  0.11640000   0.00000065
  0.11640000   0.00000061
  0.11640000   0.00000057
  0.11640000   0.00000054
  0.11660000   0.00000429
  0.11660000   0.00000296
  0.11660000   0.00000213
  0.11660000   0.00000162
  0.11660000   0.00000129
  0.11660000   0.00000108
  0.11660000   0.00000093
  0.11660000   0.00000083
  0.11660000   0.00000075
  0.11660000   0.00000069
  0.11660000   0.00000065
  0.11660000   0.00000061
  0.11660000   0.00000057
  0.11660000   0.00000054
  0.11680000   0.00000435
  0.11680000   0.00000299
  0.11680000   0.00000215
  0.11680000   0.00000163
  0.11680000   0.00000130
  0.11680000   0.00000108
  0.11680000   0.00000093
  0.11680000   0.00000083
  0.11680000   0.00000075
  0.11680000   0.00000069
  0.11680000   0.00000065
  0.11680000   0.00000061
  0.11680000   0.00000057
  0.11680000   0.00000054
  0.11700000   0.00000440
  0.11700000   0.00000302
  0.11700000   0.00000217
  0.11700000   0.00000164
  0.11700000   0.00000131
  0.11700000   0.00000108
  0.11700000   0.00000093
  0.11700000   0.00000083
  0.11700000   0.00000075
  0.11700000   0.00000069
  0.11700000   0.00000065
  0.11700000   0.00000061
  0.11700000   0.00000057
  0.11700000   0.00000054
  0.11720000   0.00000445
  0.11720000   0.00000306
  0.11720000   0.00000219
  0.11720000   0.00000166
  0.11720000   0.00000131
  0.11720000   0.00000109
  0.11720000   0.00000094
  0.11720000   0.00000083
  0.11720000   0.00000075
  0.11720000   0.00000069
  0.11720000   0.00000065
  0.11720000   0.00000061
  0.11720000   0.00000057
  0.11720000   0.00000054
  0.11740000   0.00000451
  0.11740000   0.00000309
  0.11740000   0.00000222
  0.11740000   0.00000167
  0.11740000   0.00000132
  0.11740000   0.00000109
  0.11740000   0.00000094
  0.11740000   0.00000083
  0.11740000   0.00000075
  0.11740000   0.00000069
  0.11740000   0.00000065
  0.11740000   0.00000061
  0.11740000   0.00000057
  0.11740000   0.00000054
  0.11760000   0.00000456
  0.11760000   0.00000312
  0.11760000   0.00000224
  0.11760000   0.00000168
  0.11760000   0.00000133
  0.11760000   0.00000110
  0.11760000   0.00000094
  0.11760000   0.00000083
  0.11760000   0.00000075
  0.11760000   0.00000069
  0.11760000   0.00000065
  0.11760000   0.00000061
  0.11760000   0.00000057
  0.11760000   0.00000054
  0.11780000   0.00000462
  0.11780000   0.00000316
  0.11780000   0.00000226
  0.11780000   0.00000170
  0.11780000   0.00000134
  0.11780000   0.00000110
  0.11780000   0.00000095
  0.11780000   0.00000084
  0.11780000   0.00000076
  0.11780000   0.00000069
  0.11780000   0.00000065
  0.11780000   0.00000061
  0.11780000   0.00000057
  0.11780000   0.00000054
  0.11800000   0.00000468
  0.11800000   0.00000319
  0.11800000   0.00000228
  0.11800000   0.00000171
  0.11800000   0.00000135
  0.11800000   0.00000111
  0.11800000   0.00000095
  0.11800000   0.00000084
  0.11800000   0.00000076
  0.11800000   0.00000069
  0.11800000   0.00000065
  0.11800000   0.00000061
  0.11800000   0.00000057
  0.11800000   0.00000054
  0.11820000   0.00000473
  0.11820000   0.00000323
  0.11820000   0.00000230
  0.11820000   0.00000172
  0.11820000   0.00000135
  0.11820000   0.00000111
  0.11820000   0.00000095
  0.11820000   0.00000084
  0.11820000   0.00000076
  0.11820000   0.00000070
  0.11820000   0.00000065
  0.11820000   0.00000061
  0.11820000   0.00000057
  0.11820000   0.00000054
  0.11840000   0.00000479
  0.11840000   0.00000327
  0.11840000   0.00000233
  0.11840000   0.00000174
  0.11840000   0.00000136
  0.11840000   0.00000112
  0.11840000   0.00000095
  0.11840000   0.00000084
  0.11840000   0.00000076
  0.11840000   0.00000070
  0.11840000   0.00000065
  0.11840000   0.00000061
  0.11840000   0.00000057
  0.11840000   0.00000054
  0.11860000   0.00000485
  0.11860000   0.00000331
  0.11860000   0.00000235
  0.11860000   0.00000175
  0.11860000   0.00000137
  0.11860000   0.00000112
  0.11860000   0.00000096
  0.11860000   0.00000084
  0.11860000   0.00000076
  0.11860000   0.00000070
  0.11860000   0.00000065
  0.11860000   0.00000061
  0.11860000   0.00000057
  0.11860000   0.00000054
  0.11880000   0.00000491
  0.11880000   0.00000334
  0.11880000   0.00000237
  0.11880000   0.00000177
  0.11880000   0.00000138
  0.11880000   0.00000113
  0.11880000   0.00000096
  0.11880000   0.00000084
  0.11880000   0.00000076
  0.11880000   0.00000070
  0.11880000   0.00000065
  0.11880000   0.00000060
  0.11880000   0.00000057
  0.11880000   0.00000054
  0.11900000   0.00000498
  0.11900000   0.00000338
  0.11900000   0.00000240
  0.11900000   0.00000178
  0.11900000   0.00000139
  0.11900000   0.00000113
  0.11900000   0.00000096
  0.11900000   0.00000085
  0.11900000   0.00000076
  0.11900000   0.00000070
  0.11900000   0.00000065
  0.11900000   0.00000060
  0.11900000   0.00000057
  0.11900000   0.00000054
  0.11920000   0.00000504
  0.11920000   0.00000342
  0.11920000   0.00000242
  0.11920000   0.00000180
  0.11920000   0.00000140
  0.11920000   0.00000114
  0.11920000   0.00000097
  0.11920000   0.00000085
  0.11920000   0.00000076
  0.11920000   0.00000070
  0.11920000   0.00000065
  0.11920000   0.00000060
  0.11920000   0.00000057
  0.11920000   0.00000054
  0.11940000   0.00000510
  0.11940000   0.00000346
  0.11940000   0.00000245
  0.11940000   0.00000181
  0.11940000   0.00000141
  0.11940000   0.00000115
  0.11940000   0.00000097
  0.11940000   0.00000085
  0.11940000   0.00000076
  0.11940000   0.00000070
  0.11940000   0.00000065
  0.11940000   0.00000060
  0.11940000   0.00000057
  0.11940000   0.00000054
  0.11960000   0.00000517
  0.11960000   0.00000350
  0.11960000   0.00000247
  0.11960000   0.00000183
  0.11960000   0.00000142
  0.11960000   0.00000115
  0.11960000   0.00000097
  0.11960000   0.00000085
  0.11960000   0.00000076
  0.11960000   0.00000070
  0.11960000   0.00000065
  0.11960000   0.00000060
  0.11960000   0.00000057
  0.11960000   0.00000054
  0.11980000   0.00000524
  0.11980000   0.00000354
  0.11980000   0.00000250
  0.11980000   0.00000184
  0.11980000   0.00000143
  0.11980000   0.00000116
  0.11980000   0.00000098
  0.11980000   0.00000085
  0.11980000   0.00000077
  0.11980000   0.00000070
  0.11980000   0.00000065
  0.11980000   0.00000061
  0.11980000   0.00000057
  0.11980000   0.00000054
  0.11980000   0.00000051
  0.12000000   0.00000530
  0.12000000   0.00000359
  0.12000000   0.00000252
  0.12000000   0.00000186
  0.12000000   0.00000144
  0.12000000   0.00000116
  0.12000000   0.00000098
  0.12000000   0.00000086
  0.12000000   0.00000077
  0.12000000   0.00000070
  0.12000000   0.00000065
  0.12000000   0.00000061
  0.12000000   0.00000057
  0.12000000   0.00000054
  0.12000000   0.00000051
  0.12020000   0.00000537
  0.12020000   0.00000363
  0.12020000   0.00000255
  0.12020000   0.00000188
  0.12020000   0.00000145
  0.12020000   0.00000117
  0.12020000   0.00000099
  0.12020000   0.00000086
  0.12020000   0.00000077
  0.12020000   0.00000070
  0.12020000   0.00000065
  0.12020000   0.00000061
  0.12020000   0.00000057
  0.12020000   0.00000054
  0.12020000   0.00000051
  0.12040000   0.00000544
  0.12040000   0.00000367
  0.12040000   0.00000258
  0.12040000   0.00000189
  0.12040000   0.00000146
  0.12040000   0.00000118
  0.12040000   0.00000099
  0.12040000   0.00000086
  0.12040000   0.00000077
  0.12040000   0.00000070
  0.12040000   0.00000065
  0.12040000   0.00000061
  0.12040000   0.00000057
  0.12040000   0.00000054
  0.12040000   0.00000051
  0.12060000   0.00000551
  0.12060000   0.00000372
  0.12060000   0.00000261
  0.12060000   0.00000191
  0.12060000   0.00000147
  0.12060000   0.00000118
  0.12060000   0.00000099
  0.12060000   0.00000086
  0.12060000   0.00000077
  0.12060000   0.00000070
  0.12060000   0.00000065
  0.12060000   0.00000061
  0.12060000   0.00000057
  0.12060000   0.00000054
  0.12060000   0.00000051
  0.12080000   0.00000559
  0.12080000   0.00000376
  0.12080000   0.00000264
  0.12080000   0.00000193
  0.12080000   0.00000148
  0.12080000   0.00000119
  0.12080000   0.00000100
  0.12080000   0.00000087
  0.12080000   0.00000077
  0.12080000   0.00000070
  0.12080000   0.00000065
  0.12080000   0.00000061
  0.12080000   0.00000057
  0.12080000   0.00000054
  0.12080000   0.00000051
  0.12100000   0.00000566
  0.12100000   0.00000381
  0.12100000   0.00000266
  0.12100000   0.00000195
  0.12100000   0.00000149
  0.12100000   0.00000120
  0.12100000   0.00000100
  0.12100000   0.00000087
  0.12100000   0.00000077
  0.12100000   0.00000070
  0.12100000   0.00000065
  0.12100000   0.00000061
  0.12100000   0.00000057
  0.12100000   0.00000054
  0.12100000   0.00000051
  0.12120000   0.00000574
  0.12120000   0.00000386
  0.12120000   0.00000269
  0.12120000   0.00000197
  0.12120000   0.00000150
  0.12120000   0.00000120
  0.12120000   0.00000101
  0.12120000   0.00000087
  0.12120000   0.00000078
  0.12120000   0.00000070
  0.12120000   0.00000065
  0.12120000   0.00000061
  0.12120000   0.00000057
  0.12120000   0.00000054
  0.12120000   0.00000051
  0.12140000   0.00000581
  0.12140000   0.00000391
  0.12140000   0.00000272
  0.12140000   0.00000198
  0.12140000   0.00000151
  0.12140000   0.00000121
  0.12140000   0.00000101
  0.12140000   0.00000087
  0.12140000   0.00000078
  0.12140000   0.00000071
  0.12140000   0.00000065
  0.12140000   0.00000061
  0.12140000   0.00000057
  0.12140000   0.00000054
  0.12140000   0.00000051
  0.12160000   0.00000589
  0.12160000   0.00000396
  0.12160000   0.00000275
  0.12160000   0.00000200
  0.12160000   0.00000153
  0.12160000   0.00000122
  0.12160000   0.00000102
  0.12160000   0.00000088
  0.12160000   0.00000078
  0.12160000   0.00000071
  0.12160000   0.00000065
  0.12160000   0.00000061
  0.12160000   0.00000057
  0.12160000   0.00000054
  0.12160000   0.00000051
  0.12180000   0.00000597
  0.12180000   0.00000401
  0.12180000   0.00000279
  0.12180000   0.00000202
  0.12180000   0.00000154
  0.12180000   0.00000123
  0.12180000   0.00000102
  0.12180000   0.00000088
  0.12180000   0.00000078
  0.12180000   0.00000071
  0.12180000   0.00000065
  0.12180000   0.00000061
  0.12180000   0.00000057
  0.12180000   0.00000054
  0.12180000   0.00000051
  0.12200000   0.00000605
  0.12200000   0.00000406
  0.12200000   0.00000282
  0.12200000   0.00000204
  0.12200000   0.00000155
  0.12200000   0.00000123
  0.12200000   0.00000102
  0.12200000   0.00000088
  0.12200000   0.00000078
  0.12200000   0.00000071
  0.12200000   0.00000065
  0.12200000   0.00000061
  0.12200000   0.00000057
  0.12200000   0.00000054
  0.12200000   0.00000051
  0.12220000   0.00000613
  0.12220000   0.00000411
  0.12220000   0.00000285
  0.12220000   0.00000206
  0.12220000   0.00000156
  0.12220000   0.00000124
  0.12220000   0.00000103
  0.12220000   0.00000089
  0.12220000   0.00000078
  0.12220000   0.00000071
  0.12220000   0.00000065
  0.12220000   0.00000061
  0.12220000   0.00000057
  0.12220000   0.00000054
  0.12220000   0.00000051
  0.12240000   0.00000621
  0.12240000   0.00000416
  0.12240000   0.00000288
  0.12240000   0.00000208
  0.12240000   0.00000158
  0.12240000   0.00000125
  0.12240000   0.00000103
  0.12240000   0.00000089
  0.12240000   0.00000079
  0.12240000   0.00000071
  0.12240000   0.00000065
  0.12240000   0.00000061
  0.12240000   0.00000057
  0.12240000   0.00000054
  0.12240000   0.00000051
  0.12260000   0.00000630
  0.12260000   0.00000421
  0.12260000   0.00000292
  0.12260000   0.00000211
  0.12260000   0.00000159
  0.12260000   0.00000126
  0.12260000   0.00000104
  0.12260000   0.00000089
  0.12260000   0.00000079
  0.12260000   0.00000071
  0.12260000   0.00000065
  0.12260000   0.00000061
  0.12260000   0.00000057
  0.12260000   0.00000054
  0.12260000   0.00000051
  0.12280000   0.00000638
  0.12280000   0.00000427
  0.12280000   0.00000295
  0.12280000   0.00000213
  0.12280000   0.00000160
  0.12280000   0.00000127
  0.12280000   0.00000104
  0.12280000   0.00000089
  0.12280000   0.00000079
  0.12280000   0.00000071
  0.12280000   0.00000065
  0.12280000   0.00000061
  0.12280000   0.00000057
  0.12280000   0.00000054
  0.12280000   0.00000051
  0.12300000   0.00000647
  0.12300000   0.00000432
  0.12300000   0.00000299
  0.12300000   0.00000215
  0.12300000   0.00000162
  0.12300000   0.00000128
  0.12300000   0.00000105
  0.12300000   0.00000090
  0.12300000   0.00000079
  0.12300000   0.00000071
  0.12300000   0.00000065
  0.12300000   0.00000061
  0.12300000   0.00000057
  0.12300000   0.00000054
  0.12300000   0.00000051
  0.12300000   0.00000048
  0.12320000   0.00000656
  0.12320000   0.00000438
  0.12320000   0.00000302
  0.12320000   0.00000217
  0.12320000   0.00000163
  0.12320000   0.00000128
  0.12320000   0.00000106
  0.12320000   0.00000090
  0.12320000   0.00000079
  0.12320000   0.00000071
  0.12320000   0.00000065
  0.12320000   0.00000061
  0.12320000   0.00000057
  0.12320000   0.00000054
  0.12320000   0.00000051
  0.12320000   0.00000048
  0.12340000   0.00000665
  0.12340000   0.00000444
  0.12340000   0.00000306
  0.12340000   0.00000219
  0.12340000   0.00000165
  0.12340000   0.00000129
  0.12340000   0.00000106
  0.12340000   0.00000090
  0.12340000   0.00000079
  0.12340000   0.00000071
  0.12340000   0.00000065
  0.12340000   0.00000061
  0.12340000   0.00000057
  0.12340000   0.00000054
  0.12340000   0.00000051
  0.12340000   0.00000048
  0.12360000   0.00000674
  0.12360000   0.00000449
  0.12360000   0.00000310
  0.12360000   0.00000222
  0.12360000   0.00000166
  0.12360000   0.00000130
  0.12360000   0.00000107
  0.12360000   0.00000091
  0.12360000   0.00000080
  0.12360000   0.00000072
  0.12360000   0.00000066
  0.12360000   0.00000061
  0.12360000   0.00000057
  0.12360000   0.00000054
  0.12360000   0.00000051
  0.12360000   0.00000048
  0.12380000   0.00000684
  0.12380000   0.00000455
  0.12380000   0.00000313
  0.12380000   0.00000224
  0.12380000   0.00000168
  0.12380000   0.00000131
  0.12380000   0.00000107
  0.12380000   0.00000091
  0.12380000   0.00000080
  0.12380000   0.00000072
  0.12380000   0.00000066
  0.12380000   0.00000061
  0.12380000   0.00000057
  0.12380000   0.00000054
  0.12380000   0.00000051
  0.12380000   0.00000048
  0.12400000   0.00000693
  0.12400000   0.00000461
  0.12400000   0.00000317
  0.12400000   0.00000227
  0.12400000   0.00000169
  0.12400000   0.00000132
  0.12400000   0.00000108
  0.12400000   0.00000091
  0.12400000   0.00000080
  0.12400000   0.00000072
  0.12400000   0.00000066
  0.12400000   0.00000061
  0.12400000   0.00000057
  0.12400000   0.00000054
  0.12400000   0.00000051
  0.12400000   0.00000048
  0.12420000   0.00000703
  0.12420000   0.00000468
  0.12420000   0.00000321
  0.12420000   0.00000229
  0.12420000   0.00000171
  0.12420000   0.00000133
  0.12420000   0.00000108
  0.12420000   0.00000092
  0.12420000   0.00000080
  0.12420000   0.00000072
  0.12420000   0.00000066
  0.12420000   0.00000061
  0.12420000   0.00000057
  0.12420000   0.00000054
  0.12420000   0.00000051
  0.12420000   0.00000048
  0.12440000   0.00000712
  0.12440000   0.00000474
  0.12440000   0.00000325
  0.12440000   0.00000231
  0.12440000   0.00000172
  0.12440000   0.00000134
  0.12440000   0.00000109
  0.12440000   0.00000092
  0.12440000   0.00000081
  0.12440000   0.00000072
  0.12440000   0.00000066
  0.12440000   0.00000061
  0.12440000   0.00000057
  0.12440000   0.00000054
  0.12440000   0.00000051
  0.12440000   0.00000048
  0.12460000   0.00000722
  0.12460000   0.00000480
  0.12460000   0.00000329
  0.12460000   0.00000234
  0.12460000   0.00000174
  0.12460000   0.00000135
  0.12460000   0.00000110
  0.12460000   0.00000093
  0.12460000   0.00000081
  0.12460000   0.00000072
  0.12460000   0.00000066
  0.12460000   0.00000061
  0.12460000   0.00000057
  0.12460000   0.00000054
  0.12460000   0.00000051
  0.12460000   0.00000048
  0.12480000   0.00000733
  0.12480000   0.00000487
  0.12480000   0.00000333
  0.12480000   0.00000237
  0.12480000   0.00000175
  0.12480000   0.00000136
  0.12480000   0.00000110
  0.12480000   0.00000093
  0.12480000   0.00000081
  0.12480000   0.00000072
  0.12480000   0.00000066
  0.12480000   0.00000061
  0.12480000   0.00000057
  0.12480000   0.00000054
  0.12480000   0.00000051
  0.12480000   0.00000048
  0.12500000   0.00000743
  0.12500000   0.00000493
  0.12500000   0.00000337
  0.12500000   0.00000239
  0.12500000   0.00000177
  0.12500000   0.00000137
  0.12500000   0.00000111
  0.12500000   0.00000093
  0.12500000   0.00000081
  0.12500000   0.00000073
  0.12500000   0.00000066
  0.12500000   0.00000061
  0.12500000   0.00000057
  0.12500000   0.00000054
  0.12500000   0.00000051
  0.12500000   0.00000048
  0.12520000   0.00000753
  0.12520000   0.00000500
  0.12520000   0.00000342
  0.12520000   0.00000242
  0.12520000   0.00000179
  0.12520000   0.00000138
  0.12520000   0.00000112
  0.12520000   0.00000094
  0.12520000   0.00000081
  0.12520000   0.00000073
  0.12520000   0.00000066
  0.12520000   0.00000061
  0.12520000   0.00000057
  0.12520000   0.00000054
  0.12520000   0.00000051
  0.12520000   0.00000048
  0.12540000   0.00000764
  0.12540000   0.00000507
  0.12540000   0.00000346
  0.12540000   0.00000245
  0.12540000   0.00000181
  0.12540000   0.00000139
  0.12540000   0.00000112
  0.12540000   0.00000094
  0.12540000   0.00000082
  0.12540000   0.00000073
  0.12540000   0.00000066
  0.12540000   0.00000061
  0.12540000   0.00000057
  0.12540000   0.00000054
  0.12540000   0.00000051
  0.12540000   0.00000048
  0.12560000   0.00000775
  0.12560000   0.00000514
  0.12560000   0.00000350
  0.12560000   0.00000248
  0.12560000   0.00000182
  0.12560000   0.00000140
  0.12560000   0.00000113
  0.12560000   0.00000095
  0.12560000   0.00000082
  0.12560000   0.00000073
  0.12560000   0.00000066
  0.12560000   0.00000061
  0.12560000   0.00000057
  0.12560000   0.00000054
  0.12560000   0.00000051
  0.12560000   0.00000048
  0.12580000   0.00000786
  0.12580000   0.00000521
  0.12580000   0.00000355
  0.12580000   0.00000251
  0.12580000   0.00000184
  0.12580000   0.00000142
  0.12580000   0.00000114
  0.12580000   0.00000095
  0.12580000   0.00000082
  0.12580000   0.00000073
  0.12580000   0.00000066
  0.12580000   0.00000061
  0.12580000   0.00000057
  0.12580000   0.00000054
  0.12580000   0.00000051
  0.12580000   0.00000048
  0.12600000   0.00000797
  0.12600000   0.00000528
  0.12600000   0.00000360
  0.12600000   0.00000253
  0.12600000   0.00000186
  0.12600000   0.00000143
  0.12600000   0.00000114
  0.12600000   0.00000096
  0.12600000   0.00000083
  0.12600000   0.00000073
  0.12600000   0.00000066
  0.12600000   0.00000061
  0.12600000   0.00000057
  0.12600000   0.00000054
  0.12600000   0.00000051
  0.12600000   0.00000048
  0.12600000   0.00000046
  0.12620000   0.00000809
  0.12620000   0.00000535
  0.12620000   0.00000364
  0.12620000   0.00000256
  0.12620000   0.00000188
  0.12620000   0.00000144
  0.12620000   0.00000115
  0.12620000   0.00000096
  0.12620000   0.00000083
  0.12620000   0.00000073
  0.12620000   0.00000067
  0.12620000   0.00000061
  0.12620000   0.00000057
  0.12620000   0.00000054
  0.12620000   0.00000051
  0.12620000   0.00000048
  0.12620000   0.00000046
  0.12640000   0.00000820
  0.12640000   0.00000543
  0.12640000   0.00000369
  0.12640000   0.00000259
  0.12640000   0.00000190
  0.12640000   0.00000145
  0.12640000   0.00000116
  0.12640000   0.00000096
  0.12640000   0.00000083
  0.12640000   0.00000074
  0.12640000   0.00000067
  0.12640000   0.00000061
  0.12640000   0.00000057
  0.12640000   0.00000054
  0.12640000   0.00000051
  0.12640000   0.00000048
  0.12640000   0.00000046
  0.12660000   0.00000832
  0.12660000   0.00000550
  0.12660000   0.00000374
  0.12660000   0.00000263
  0.12660000   0.00000192
  0.12660000   0.00000146
  0.12660000   0.00000117
  0.12660000   0.00000097
  0.12660000   0.00000083
  0.12660000   0.00000074
  0.12660000   0.00000067
  0.12660000   0.00000061
  0.12660000   0.00000057
  0.12660000   0.00000054
  0.12660000   0.00000051
  0.12660000   0.00000048
  0.12660000   0.00000046
  0.12680000   0.00000844
  0.12680000   0.00000558
  0.12680000   0.00000379
  0.12680000   0.00000266
  0.12680000   0.00000194
  0.12680000   0.00000148
  0.12680000   0.00000118
  0.12680000   0.00000097
  0.12680000   0.00000084
  0.12680000   0.00000074
  0.12680000   0.00000067
  0.12680000   0.00000061
  0.12680000   0.00000057
  0.12680000   0.00000054
  0.12680000   0.00000051
  0.12680000   0.00000048
  0.12680000   0.00000046
  0.12700000   0.00000856
  0.12700000   0.00000566
  0.12700000   0.00000384
  0.12700000   0.00000269
  0.12700000   0.00000196
  0.12700000   0.00000149
  0.12700000   0.00000118
  0.12700000   0.00000098
  0.12700000   0.00000084
  0.12700000   0.00000074
  0.12700000   0.00000067
  0.12700000   0.00000061
  0.12700000   0.00000057
  0.12700000   0.00000054
  0.12700000   0.00000051
  0.12700000   0.00000048
  0.12700000   0.00000046
  0.12720000   0.00000869
  0.12720000   0.00000574
  0.12720000   0.00000389
  0.12720000   0.00000272
  0.12720000   0.00000198
  0.12720000   0.00000150
  0.12720000   0.00000119
  0.12720000   0.00000098
  0.12720000   0.00000084
  0.12720000   0.00000074
  0.12720000   0.00000067
  0.12720000   0.00000062
  0.12720000   0.00000057
  0.12720000   0.00000054
  0.12720000   0.00000051
  0.12720000   0.00000048
  0.12720000   0.00000046
  0.12740000   0.00000881
  0.12740000   0.00000582
  0.12740000   0.00000394
  0.12740000   0.00000276
  0.12740000   0.00000200
  0.12740000   0.00000152
  0.12740000   0.00000120
  0.12740000   0.00000099
  0.12740000   0.00000085
  0.12740000   0.00000075
  0.12740000   0.00000067
  0.12740000   0.00000062
  0.12740000   0.00000057
  0.12740000   0.00000054
  0.12740000   0.00000050
  0.12740000   0.00000048
  0.12740000   0.00000046
  0.12760000   0.00000894
  0.12760000   0.00000590
  0.12760000   0.00000400
  0.12760000   0.00000279
  0.12760000   0.00000202
  0.12760000   0.00000153
  0.12760000   0.00000121
  0.12760000   0.00000100
  0.12760000   0.00000085
  0.12760000   0.00000075
  0.12760000   0.00000067
  0.12760000   0.00000062
  0.12760000   0.00000057
  0.12760000   0.00000054
  0.12760000   0.00000050
  0.12760000   0.00000048
  0.12760000   0.00000045
  0.12780000   0.00000907
  0.12780000   0.00000599
  0.12780000   0.00000405
  0.12780000   0.00000283
  0.12780000   0.00000205
  0.12780000   0.00000154
  0.12780000   0.00000122
  0.12780000   0.00000100
  0.12780000   0.00000085
  0.12780000   0.00000075
  0.12780000   0.00000067
  0.12780000   0.00000062
  0.12780000   0.00000057
  0.12780000   0.00000054
  0.12780000   0.00000050
  0.12780000   0.00000048
  0.12780000   0.00000045
  0.12800000   0.00000921
  0.12800000   0.00000607
  0.12800000   0.00000411
  0.12800000   0.00000286
  0.12800000   0.00000207
  0.12800000   0.00000156
  0.12800000   0.00000123
  0.12800000   0.00000101
  0.12800000   0.00000086
  0.12800000   0.00000075
  0.12800000   0.00000068
  0.12800000   0.00000062
  0.12800000   0.00000057
  0.12800000   0.00000054
  0.12800000   0.00000050
  0.12800000   0.00000048
  0.12800000   0.00000045
  0.12820000   0.00000934
  0.12820000   0.00000616
  0.12820000   0.00000416
  0.12820000   0.00000290
  0.12820000   0.00000209
  0.12820000   0.00000157
  0.12820000   0.00000124
  0.12820000   0.00000101
  0.12820000   0.00000086
  0.12820000   0.00000075
  0.12820000   0.00000068
  0.12820000   0.00000062
  0.12820000   0.00000057
  0.12820000   0.00000054
  0.12820000   0.00000050
  0.12820000   0.00000048
  0.12820000   0.00000045
  0.12840000   0.00000948
  0.12840000   0.00000625
  0.12840000   0.00000422
  0.12840000   0.00000293
  0.12840000   0.00000212
  0.12840000   0.00000159
  0.12840000   0.00000125
  0.12840000   0.00000102
  0.12840000   0.00000086
  0.12840000   0.00000076
  0.12840000   0.00000068
  0.12840000   0.00000062
  0.12840000   0.00000057
  0.12840000   0.00000054
  0.12840000   0.00000050
  0.12840000   0.00000048
  0.12840000   0.00000045
  0.12860000   0.00000962
  0.12860000   0.00000634
  0.12860000   0.00000428
  0.12860000   0.00000297
  0.12860000   0.00000214
  0.12860000   0.00000160
  0.12860000   0.00000126
  0.12860000   0.00000103
  0.12860000   0.00000087
  0.12860000   0.00000076
  0.12860000   0.00000068
  0.12860000   0.00000062
  0.12860000   0.00000057
  0.12860000   0.00000054
  0.12860000   0.00000050
  0.12860000   0.00000048
  0.12860000   0.00000045
  0.12880000   0.00000976
  0.12880000   0.00000643
  0.12880000   0.00000434
  0.12880000   0.00000301
  0.12880000   0.00000216
  0.12880000   0.00000162
  0.12880000   0.00000127
  0.12880000   0.00000103
  0.12880000   0.00000087
  0.12880000   0.00000076
  0.12880000   0.00000068
  0.12880000   0.00000062
  0.12880000   0.00000057
  0.12880000   0.00000054
  0.12880000   0.00000050
  0.12880000   0.00000048
  0.12880000   0.00000045
  0.12880000   0.00000043
  0.12900000   0.00000991
  0.12900000   0.00000653
  0.12900000   0.00000440
  0.12900000   0.00000305
  0.12900000   0.00000219
  0.12900000   0.00000164
  0.12900000   0.00000128
  0.12900000   0.00000104
  0.12900000   0.00000088
  0.12900000   0.00000076
  0.12900000   0.00000068
  0.12900000   0.00000062
  0.12900000   0.00000057
  0.12900000   0.00000054
  0.12900000   0.00000050
  0.12900000   0.00000048
  0.12900000   0.00000045
  0.12900000   0.00000043
  0.12920000   0.00001005
  0.12920000   0.00000662
  0.12920000   0.00000446
  0.12920000   0.00000309
  0.12920000   0.00000221
  0.12920000   0.00000165
  0.12920000   0.00000129
  0.12920000   0.00000104
  0.12920000   0.00000088
  0.12920000   0.00000077
  0.12920000   0.00000068
  0.12920000   0.00000062
  0.12920000   0.00000058
  0.12920000   0.00000054
  0.12920000   0.00000050
  0.12920000   0.00000048
  0.12920000   0.00000045
  0.12920000   0.00000043
  0.12940000   0.00001020
  0.12940000   0.00000672
  0.12940000   0.00000452
  0.12940000   0.00000313
  0.12940000   0.00000224
  0.12940000   0.00000167
  0.12940000   0.00000130
  0.12940000   0.00000105
  0.12940000   0.00000088
  0.12940000   0.00000077
  0.12940000   0.00000069
  0.12940000   0.00000062
  0.12940000   0.00000058
  0.12940000   0.00000054
  0.12940000   0.00000050
  0.12940000   0.00000048
  0.12940000   0.00000045
  0.12940000   0.00000043
  0.12960000   0.00001035
  0.12960000   0.00000682
  0.12960000   0.00000459
  0.12960000   0.00000317
  0.12960000   0.00000227
  0.12960000   0.00000169
  0.12960000   0.00000131
  0.12960000   0.00000106
  0.12960000   0.00000089
  0.12960000   0.00000077
  0.12960000   0.00000069
  0.12960000   0.00000062
  0.12960000   0.00000058
  0.12960000   0.00000054
  0.12960000   0.00000050
  0.12960000   0.00000048
  0.12960000   0.00000045
  0.12960000   0.00000043
  0.12980000   0.00001051
  0.12980000   0.00000692
  0.12980000   0.00000465
  0.12980000   0.00000321
  0.12980000   0.00000229
  0.12980000   0.00000170
  0.12980000   0.00000132
  0.12980000   0.00000107
  0.12980000   0.00000089
  0.12980000   0.00000077
  0.12980000   0.00000069
  0.12980000   0.00000063
  0.12980000   0.00000058
  0.12980000   0.00000054
  0.12980000   0.00000050
  0.12980000   0.00000048
  0.12980000   0.00000045
  0.12980000   0.00000043
  0.13000000   0.00001067
  0.13000000   0.00000702
  0.13000000   0.00000472
  0.13000000   0.00000326
  0.13000000   0.00000232
  0.13000000   0.00000172
  0.13000000   0.00000133
  0.13000000   0.00000107
  0.13000000   0.00000090
  0.13000000   0.00000078
  0.13000000   0.00000069
  0.13000000   0.00000063
  0.13000000   0.00000058
  0.13000000   0.00000054
  0.13000000   0.00000050
  0.13000000   0.00000048
  0.13000000   0.00000045
  0.13000000   0.00000043
  0.13020000   0.00001083
  0.13020000   0.00000712
  0.13020000   0.00000478
  0.13020000   0.00000330
  0.13020000   0.00000235
  0.13020000   0.00000174
  0.13020000   0.00000134
  0.13020000   0.00000108
  0.13020000   0.00000090
  0.13020000   0.00000078
  0.13020000   0.00000069
  0.13020000   0.00000063
  0.13020000   0.00000058
  0.13020000   0.00000054
  0.13020000   0.00000050
  0.13020000   0.00000048
  0.13020000   0.00000045
  0.13020000   0.00000043
  0.13040000   0.00001099
  0.13040000   0.00000723
  0.13040000   0.00000485
  0.13040000   0.00000334
  0.13040000   0.00000238
  0.13040000   0.00000176
  0.13040000   0.00000135
  0.13040000   0.00000109
  0.13040000   0.00000091
  0.13040000   0.00000078
  0.13040000   0.00000069
  0.13040000   0.00000063
  0.13040000   0.00000058
  0.13040000   0.00000054
  0.13040000   0.00000051
  0.13040000   0.00000048
  0.13040000   0.00000045
  0.13040000   0.00000043
  0.13060000   0.00001115
  0.13060000   0.00000734
  0.13060000   0.00000492
  0.13060000   0.00000339
  0.13060000   0.00000241
  0.13060000   0.00000178
  0.13060000   0.00000137
  0.13060000   0.00000109
  0.13060000   0.00000091
  0.13060000   0.00000079
  0.13060000   0.00000070
  0.13060000   0.00000063
  0.13060000   0.00000058
  0.13060000   0.00000054
  0.13060000   0.00000051
  0.13060000   0.00000048
  0.13060000   0.00000045
  0.13060000   0.00000043
  0.13080000   0.00001132
  0.13080000   0.00000745
  0.13080000   0.00000499
  0.13080000   0.00000344
  0.13080000   0.00000244
  0.13080000   0.00000180
  0.13080000   0.00000138
  0.13080000   0.00000110
  0.13080000   0.00000092
  0.13080000   0.00000079
  0.13080000   0.00000070
  0.13080000   0.00000063
  0.13080000   0.00000058
  0.13080000   0.00000054
  0.13080000   0.00000051
  0.13080000   0.00000048
  0.13080000   0.00000045
  0.13080000   0.00000043
  0.13100000   0.00001149
  0.13100000   0.00000756
  0.13100000   0.00000507
  0.13100000   0.00000348
  0.13100000   0.00000247
  0.13100000   0.00000182
  0.13100000   0.00000139
  0.13100000   0.00000111
  0.13100000   0.00000092
  0.13100000   0.00000079
  0.13100000   0.00000070
  0.13100000   0.00000063
  0.13100000   0.00000058
  0.13100000   0.00000054
  0.13100000   0.00000051
  0.13100000   0.00000048
  0.13100000   0.00000045
  0.13100000   0.00000043
  0.13120000   0.00001167
  0.13120000   0.00000767
  0.13120000   0.00000514
  0.13120000   0.00000353
  0.13120000   0.00000250
  0.13120000   0.00000184
  0.13120000   0.00000140
  0.13120000   0.00000112
  0.13120000   0.00000093
  0.13120000   0.00000080
  0.13120000   0.00000070
  0.13120000   0.00000063
  0.13120000   0.00000058
  0.13120000   0.00000054
  0.13120000   0.00000051
  0.13120000   0.00000048
  0.13120000   0.00000045
  0.13120000   0.00000043
  0.13140000   0.00001184
  0.13140000   0.00000779
  0.13140000   0.00000522
  0.13140000   0.00000358
  0.13140000   0.00000253
  0.13140000   0.00000186
  0.13140000   0.00000142
  0.13140000   0.00000113
  0.13140000   0.00000093
  0.13140000   0.00000080
  0.13140000   0.00000070
  0.13140000   0.00000063
  0.13140000   0.00000058
  0.13140000   0.00000054
  0.13140000   0.00000051
  0.13140000   0.00000048
  0.13140000   0.00000045
  0.13140000   0.00000043
  0.13160000   0.00001202
  0.13160000   0.00000791
  0.13160000   0.00000529
  0.13160000   0.00000363
  0.13160000   0.00000256
  0.13160000   0.00000188
  0.13160000   0.00000143
  0.13160000   0.00000114
  0.13160000   0.00000094
  0.13160000   0.00000080
  0.13160000   0.00000071
  0.13160000   0.00000064
  0.13160000   0.00000058
  0.13160000   0.00000054
  0.13160000   0.00000051
  0.13160000   0.00000048
  0.13160000   0.00000045
  0.13160000   0.00000043
  0.13160000   0.00000041
  0.13180000   0.00001221
  0.13180000   0.00000803
  0.13180000   0.00000537
  0.13180000   0.00000368
  0.13180000   0.00000260
  0.13180000   0.00000190
  0.13180000   0.00000145
  0.13180000   0.00000115
  0.13180000   0.00000094
  0.13180000   0.00000081
  0.13180000   0.00000071
  0.13180000   0.00000064
  0.13180000   0.00000058
  0.13180000   0.00000054
  0.13180000   0.00000051
  0.13180000   0.00000048
  0.13180000   0.00000045
  0.13180000   0.00000043
  0.13180000   0.00000041
  0.13200000   0.00001239
  0.13200000   0.00000815
  0.13200000   0.00000545
  0.13200000   0.00000373
  0.13200000   0.00000263
  0.13200000   0.00000192
  0.13200000   0.00000146
  0.13200000   0.00000115
  0.13200000   0.00000095
  0.13200000   0.00000081
  0.13200000   0.00000071
  0.13200000   0.00000064
  0.13200000   0.00000058
  0.13200000   0.00000054
  0.13200000   0.00000051
  0.13200000   0.00000048
  0.13200000   0.00000045
  0.13200000   0.00000043
  0.13200000   0.00000041
  0.13220000   0.00001258
  0.13220000   0.00000827
  0.13220000   0.00000553
  0.13220000   0.00000379
  0.13220000   0.00000267
  0.13220000   0.00000194
  0.13220000   0.00000147
  0.13220000   0.00000116
  0.13220000   0.00000096
  0.13220000   0.00000081
  0.13220000   0.00000071
  0.13220000   0.00000064
  0.13220000   0.00000058
  0.13220000   0.00000054
  0.13220000   0.00000051
  0.13220000   0.00000048
  0.13220000   0.00000045
  0.13220000   0.00000043
  0.13220000   0.00000041
  0.13240000   0.00001277
  0.13240000   0.00000840
  0.13240000   0.00000562
  0.13240000   0.00000384
  0.13240000   0.00000270
  0.13240000   0.00000197
  0.13240000   0.00000149
  0.13240000   0.00000117
  0.13240000   0.00000096
  0.13240000   0.00000082
  0.13240000   0.00000071
  0.13240000   0.00000064
  0.13240000   0.00000059
  0.13240000   0.00000054
  0.13240000   0.00000051
  0.13240000   0.00000048
  0.13240000   0.00000045
  0.13240000   0.00000043
  0.13240000   0.00000041
  0.13260000   0.00001297
  0.13260000   0.00000853
  0.13260000   0.00000570
  0.13260000   0.00000389
  0.13260000   0.00000274
  0.13260000   0.00000199
  0.13260000   0.00000150
  0.13260000   0.00000118
  0.13260000   0.00000097
  0.13260000   0.00000082
  0.13260000   0.00000072
  0.13260000   0.00000064
  0.13260000   0.00000059
  0.13260000   0.00000054
  0.13260000   0.00000051
  0.13260000   0.00000048
  0.13260000   0.00000045
  0.13260000   0.00000043
  0.13260000   0.00000041
  0.13280000   0.00001317
  0.13280000   0.00000866
  0.13280000   0.00000579
  0.13280000   0.00000395
  0.13280000   0.00000277
  0.13280000   0.00000201
  0.13280000   0.00000152
  0.13280000   0.00000119
  0.13280000   0.00000097
  0.13280000   0.00000082
  0.13280000   0.00000072
  0.13280000   0.00000064
  0.13280000   0.00000059
  0.13280000   0.00000054
  0.13280000   0.00000051
  0.13280000   0.00000048
  0.13280000   0.00000045
  0.13280000   0.00000043
  0.13280000   0.00000041
  0.13300000   0.00001337
  0.13300000   0.00000879
  0.13300000   0.00000587
  0.13300000   0.00000401
  0.13300000   0.00000281
  0.13300000   0.00000204
  0.13300000   0.00000153
  0.13300000   0.00000120
  0.13300000   0.00000098
  0.13300000   0.00000083
  0.13300000   0.00000072
  0.13300000   0.00000065
  0.13300000   0.00000059
  0.13300000   0.00000054
  0.13300000   0.00000051
  0.13300000   0.00000048
  0.13300000   0.00000045
  0.13300000   0.00000043
  0.13300000   0.00000041
  0.13320000   0.00001358
  0.13320000   0.00000893
  0.13320000   0.00000596
  0.13320000   0.00000407
  0.13320000   0.00000285
  0.13320000   0.00000206
  0.13320000   0.00000155
  0.13320000   0.00000121
  0.13320000   0.00000099
  0.13320000   0.00000083
  0.13320000   0.00000073
  0.13320000   0.00000065
  0.13320000   0.00000059
  0.13320000   0.00000054
  0.13320000   0.00000051
  0.13320000   0.00000048
  0.13320000   0.00000045
  0.13320000   0.00000043
  0.13320000   0.00000041
  0.13340000   0.00001378
  0.13340000   0.00000906
  0.13340000   0.00000605
  0.13340000   0.00000413
  0.13340000   0.00000289
  0.13340000   0.00000209
  0.13340000   0.00000157
  0.13340000   0.00000122
  0.13340000   0.00000099
  0.13340000   0.00000084
  0.13340000   0.00000073
  0.13340000   0.00000065
  0.13340000   0.00000059
  0.13340000   0.00000054
  0.13340000   0.00000051
  0.13340000   0.00000048
  0.13340000   0.00000045
  0.13340000   0.00000043
  0.13340000   0.00000041
  0.13360000   0.00001400
  0.13360000   0.00000920
  0.13360000   0.00000614
  0.13360000   0.00000419
  0.13360000   0.00000293
  0.13360000   0.00000211
  0.13360000   0.00000158
  0.13360000   0.00000123
  0.13360000   0.00000100
  0.13360000   0.00000084
  0.13360000   0.00000073
  0.13360000   0.00000065
  0.13360000   0.00000059
  0.13360000   0.00000054
  0.13360000   0.00000051
  0.13360000   0.00000048
  0.13360000   0.00000045
  0.13360000   0.00000043
  0.13360000   0.00000041
  0.13380000   0.00001421
  0.13380000   0.00000935
  0.13380000   0.00000624
  0.13380000   0.00000425
  0.13380000   0.00000297
  0.13380000   0.00000214
  0.13380000   0.00000160
  0.13380000   0.00000125
  0.13380000   0.00000101
  0.13380000   0.00000085
  0.13380000   0.00000073
  0.13380000   0.00000065
  0.13380000   0.00000059
  0.13380000   0.00000055
  0.13380000   0.00000051
  0.13380000   0.00000048
  0.13380000   0.00000045
  0.13380000   0.00000043
  0.13380000   0.00000041
  0.13400000   0.00001443
  0.13400000   0.00000949
  0.13400000   0.00000633
  0.13400000   0.00000431
  0.13400000   0.00000301
  0.13400000   0.00000217
  0.13400000   0.00000162
  0.13400000   0.00000126
  0.13400000   0.00000102
  0.13400000   0.00000085
  0.13400000   0.00000074
  0.13400000   0.00000065
  0.13400000   0.00000059
  0.13400000   0.00000055
  0.13400000   0.00000051
  0.13400000   0.00000048
  0.13400000   0.00000045
  0.13400000   0.00000043
  0.13400000   0.00000041
  0.13420000   0.00001466
  0.13420000   0.00000964
  0.13420000   0.00000643
  0.13420000   0.00000437
  0.13420000   0.00000305
  0.13420000   0.00000219
  0.13420000   0.00000164
  0.13420000   0.00000127
  0.13420000   0.00000102
  0.13420000   0.00000086
  0.13420000   0.00000074
  0.13420000   0.00000066
  0.13420000   0.00000059
  0.13420000   0.00000055
  0.13420000   0.00000051
  0.13420000   0.00000048
  0.13420000   0.00000045
  0.13420000   0.00000043
  0.13420000   0.00000041
  0.13420000   0.00000039
  0.13440000   0.00001488
  0.13440000   0.00000979
  0.13440000   0.00000653
  0.13440000   0.00000444
  0.13440000   0.00000309
  0.13440000   0.00000222
  0.13440000   0.00000165
  0.13440000   0.00000128
  0.13440000   0.00000103
  0.13440000   0.00000086
  0.13440000   0.00000074
  0.13440000   0.00000066
  0.13440000   0.00000060
  0.13440000   0.00000055
  0.13440000   0.00000051
  0.13440000   0.00000048
  0.13440000   0.00000045
  0.13440000   0.00000043
  0.13440000   0.00000041
  0.13440000   0.00000039
  0.13460000   0.00001512
  0.13460000   0.00000994
  0.13460000   0.00000663
  0.13460000   0.00000451
  0.13460000   0.00000314
  0.13460000   0.00000225
  0.13460000   0.00000167
  0.13460000   0.00000129
  0.13460000   0.00000104
  0.13460000   0.00000087
  0.13460000   0.00000075
  0.13460000   0.00000066
  0.13460000   0.00000060
  0.13460000   0.00000055
  0.13460000   0.00000051
  0.13460000   0.00000048
  0.13460000   0.00000045
  0.13460000   0.00000043
  0.13460000   0.00000041
  0.13460000   0.00000039
  0.13480000   0.00001535
  0.13480000   0.00001010
  0.13480000   0.00000673
  0.13480000   0.00000457
  0.13480000   0.00000318
  0.13480000   0.00000228
  0.13480000   0.00000169
  0.13480000   0.00000131
  0.13480000   0.00000105
  0.13480000   0.00000087
  0.13480000   0.00000075
  0.13480000   0.00000066
  0.13480000   0.00000060
  0.13480000   0.00000055
  0.13480000   0.00000051
  0.13480000   0.00000048
  0.13480000   0.00000045
  0.13480000   0.00000043
  0.13480000   0.00000041
  0.13480000   0.00000039
  0.13500000   0.00001559
  0.13500000   0.00001026
  0.13500000   0.00000684
  0.13500000   0.00000464
  0.13500000   0.00000323
  0.13500000   0.00000231
  0.13500000   0.00000171
  0.13500000   0.00000132
  0.13500000   0.00000105
  0.13500000   0.00000088
  0.13500000   0.00000075
  0.13500000   0.00000066
  0.13500000   0.00000060
  0.13500000   0.00000055
  0.13500000   0.00000051
  0.13500000   0.00000048
  0.13500000   0.00000045
  0.13500000   0.00000043
  0.13500000   0.00000041
  0.13500000   0.00000039
  0.13520000   0.00001583
  0.13520000   0.00001042
  0.13520000   0.00000694
  0.13520000   0.00000471
  0.13520000   0.00000327
  0.13520000   0.00000234
  0.13520000   0.00000173
  0.13520000   0.00000133
  0.13520000   0.00000106
  0.13520000   0.00000088
  0.13520000   0.00000076
  0.13520000   0.00000067
  0.13520000   0.00000060
  0.13520000   0.00000055
  0.13520000   0.00000051
  0.13520000   0.00000048
  0.13520000   0.00000045
  0.13520000   0.00000043
  0.13520000   0.00000041
  0.13520000   0.00000039
  0.13540000   0.00001608
  0.13540000   0.00001058
  0.13540000   0.00000705
  0.13540000   0.00000478
  0.13540000   0.00000332
  0.13540000   0.00000237
  0.13540000   0.00000175
  0.13540000   0.00000134
  0.13540000   0.00000107
  0.13540000   0.00000089
  0.13540000   0.00000076
  0.13540000   0.00000067
  0.13540000   0.00000060
  0.13540000   0.00000055
  0.13540000   0.00000051
  0.13540000   0.00000048
  0.13540000   0.00000045
  0.13540000   0.00000043
  0.13540000   0.00000041
  0.13540000   0.00000039
  0.13560000   0.00001633
  0.13560000   0.00001075
  0.13560000   0.00000716
  0.13560000   0.00000486
  0.13560000   0.00000337
  0.13560000   0.00000240
  0.13560000   0.00000177
  0.13560000   0.00000136
  0.13560000   0.00000108
  0.13560000   0.00000089
  0.13560000   0.00000076
  0.13560000   0.00000067
  0.13560000   0.00000060
  0.13560000   0.00000055
  0.13560000   0.00000051
  0.13560000   0.00000048
  0.13560000   0.00000045
  0.13560000   0.00000043
  0.13560000   0.00000041
  0.13560000   0.00000039
  0.13580000   0.00001659
  0.13580000   0.00001092
  0.13580000   0.00000728
  0.13580000   0.00000493
  0.13580000   0.00000342
  0.13580000   0.00000244
  0.13580000   0.00000179
  0.13580000   0.00000137
  0.13580000   0.00000109
  0.13580000   0.00000090
  0.13580000   0.00000077
  0.13580000   0.00000067
  0.13580000   0.00000060
  0.13580000   0.00000055
  0.13580000   0.00000051
  0.13580000   0.00000048
  0.13580000   0.00000045
  0.13580000   0.00000043
  0.13580000   0.00000041
  0.13580000   0.00000039
  0.13600000   0.00001685
  0.13600000   0.00001109
  0.13600000   0.00000739
  0.13600000   0.00000501
  0.13600000   0.00000347
  0.13600000   0.00000247
  0.13600000   0.00000182
  0.13600000   0.00000139
  0.13600000   0.00000110
  0.13600000   0.00000090
  0.13600000   0.00000077
  0.13600000   0.00000068
  0.13600000   0.00000061
  0.13600000   0.00000055
  0.13600000   0.00000051
  0.13600000   0.00000048
  0.13600000   0.00000045
  0.13600000   0.00000043
  0.13600000   0.00000041
  0.13600000   0.00000039
  0.13620000   0.00001711
  0.13620000   0.00001127
  0.13620000   0.00000751
  0.13620000   0.00000509
  0.13620000   0.00000352
  0.13620000   0.00000250
  0.13620000   0.00000184
  0.13620000   0.00000140
  0.13620000   0.00000111
  0.13620000   0.00000091
  0.13620000   0.00000077
  0.13620000   0.00000068
  0.13620000   0.00000061
  0.13620000   0.00000055
  0.13620000   0.00000051
  0.13620000   0.00000048
  0.13620000   0.00000045
  0.13620000   0.00000043
  0.13620000   0.00000041
  0.13620000   0.00000039
  0.13640000   0.00001738
  0.13640000   0.00001145
  0.13640000   0.00000763
  0.13640000   0.00000516
  0.13640000   0.00000357
  0.13640000   0.00000254
  0.13640000   0.00000186
  0.13640000   0.00000141
  0.13640000   0.00000112
  0.13640000   0.00000092
  0.13640000   0.00000078
  0.13640000   0.00000068
  0.13640000   0.00000061
  0.13640000   0.00000056
  0.13640000   0.00000051
  0.13640000   0.00000048
  0.13640000   0.00000045
  0.13640000   0.00000043
  0.13640000   0.00000041
  0.13640000   0.00000039
  0.13660000   0.00001766
  0.13660000   0.00001163
  0.13660000   0.00000775
  0.13660000   0.00000524
  0.13660000   0.00000362
  0.13660000   0.00000257
  0.13660000   0.00000188
  0.13660000   0.00000143
  0.13660000   0.00000113
  0.13660000   0.00000092
  0.13660000   0.00000078
  0.13660000   0.00000068
  0.13660000   0.00000061
  0.13660000   0.00000056
  0.13660000   0.00000051
  0.13660000   0.00000048
  0.13660000   0.00000045
  0.13660000   0.00000043
  0.13660000   0.00000041
  0.13660000   0.00000039
  0.13660000   0.00000037
  0.13680000   0.00001793
  0.13680000   0.00001181
  0.13680000   0.00000787
  0.13680000   0.00000533
  0.13680000   0.00000368
  0.13680000   0.00000261
  0.13680000   0.00000191
  0.13680000   0.00000145
  0.13680000   0.00000114
  0.13680000   0.00000093
  0.13680000   0.00000079
  0.13680000   0.00000069
  0.13680000   0.00000061
  0.13680000   0.00000056
  0.13680000   0.00000051
  0.13680000   0.00000048
  0.13680000   0.00000045
  0.13680000   0.00000043
  0.13680000   0.00000041
  0.13680000   0.00000039
  0.13680000   0.00000037
  0.13700000   0.00001822
  0.13700000   0.00001200
  0.13700000   0.00000800
  0.13700000   0.00000541
  0.13700000   0.00000373
  0.13700000   0.00000264
  0.13700000   0.00000193
  0.13700000   0.00000146
  0.13700000   0.00000115
  0.13700000   0.00000094
  0.13700000   0.00000079
  0.13700000   0.00000069
  0.13700000   0.00000061
  0.13700000   0.00000056
  0.13700000   0.00000051
  0.13700000   0.00000048
  0.13700000   0.00000045
  0.13700000   0.00000043
  0.13700000   0.00000041
  0.13700000   0.00000039
  0.13700000   0.00000037
  0.13720000   0.00001850
  0.13720000   0.00001219
  0.13720000   0.00000812
  0.13720000   0.00000549
  0.13720000   0.00000379
  0.13720000   0.00000268
  0.13720000   0.00000196
  0.13720000   0.00000148
  0.13720000   0.00000116
  0.13720000   0.00000094
  0.13720000   0.00000080
  0.13720000   0.00000069
  0.13720000   0.00000062
  0.13720000   0.00000056
  0.13720000   0.00000052
  0.13720000   0.00000048
  0.13720000   0.00000045
  0.13720000   0.00000043
  0.13720000   0.00000041
  0.13720000   0.00000039
  0.13720000   0.00000037
  0.13740000   0.00001880
  0.13740000   0.00001239
  0.13740000   0.00000825
  0.13740000   0.00000558
  0.13740000   0.00000385
  0.13740000   0.00000272
  0.13740000   0.00000198
  0.13740000   0.00000149
  0.13740000   0.00000117
  0.13740000   0.00000095
  0.13740000   0.00000080
  0.13740000   0.00000069
  0.13740000   0.00000062
  0.13740000   0.00000056
  0.13740000   0.00000052
  0.13740000   0.00000048
  0.13740000   0.00000045
  0.13740000   0.00000043
  0.13740000   0.00000041
  0.13740000   0.00000039
  0.13740000   0.00000037
  0.13760000   0.00001909
  0.13760000   0.00001259
  0.13760000   0.00000839
  0.13760000   0.00000567
  0.13760000   0.00000391
  0.13760000   0.00000276
  0.13760000   0.00000201
  0.13760000   0.00000151
  0.13760000   0.00000118
  0.13760000   0.00000096
  0.13760000   0.00000080
  0.13760000   0.00000070
  0.13760000   0.00000062
  0.13760000   0.00000056
  0.13760000   0.00000052
  0.13760000   0.00000048
  0.13760000   0.00000045
  0.13760000   0.00000043
  0.13760000   0.00000041
  0.13760000   0.00000039
  0.13760000   0.00000037
  0.13780000   0.00001940
  0.13780000   0.00001279
  0.13780000   0.00000852
  0.13780000   0.00000576
  0.13780000   0.00000397
  0.13780000   0.00000280
  0.13780000   0.00000203
  0.13780000   0.00000153
  0.13780000   0.00000119
  0.13780000   0.00000097
  0.13780000   0.00000081
  0.13780000   0.00000070
  0.13780000   0.00000062
  0.13780000   0.00000056
  0.13780000   0.00000052
  0.13780000   0.00000048
  0.13780000   0.00000045
  0.13780000   0.00000043
  0.13780000   0.00000041
  0.13780000   0.00000039
  0.13780000   0.00000037
  0.13800000   0.00001971
  0.13800000   0.00001300
  0.13800000   0.00000866
  0.13800000   0.00000585
  0.13800000   0.00000403
  0.13800000   0.00000284
  0.13800000   0.00000206
  0.13800000   0.00000155
  0.13800000   0.00000120
  0.13800000   0.00000097
  0.13800000   0.00000081
  0.13800000   0.00000070
  0.13800000   0.00000062
  0.13800000   0.00000056
  0.13800000   0.00000052
  0.13800000   0.00000048
  0.13800000   0.00000045
  0.13800000   0.00000043
  0.13800000   0.00000041
  0.13800000   0.00000039
  0.13800000   0.00000037
  0.13820000   0.00002002
  0.13820000   0.00001321
  0.13820000   0.00000880
  0.13820000   0.00000594
  0.13820000   0.00000409
  0.13820000   0.00000288
  0.13820000   0.00000209
  0.13820000   0.00000156
  0.13820000   0.00000122
  0.13820000   0.00000098
  0.13820000   0.00000082
  0.13820000   0.00000071
  0.13820000   0.00000063
  0.13820000   0.00000057
  0.13820000   0.00000052
  0.13820000   0.00000048
  0.13820000   0.00000045
  0.13820000   0.00000043
  0.13820000   0.00000041
  0.13820000   0.00000039
  0.13820000   0.00000037
  0.13840000   0.00002034
  0.13840000   0.00001342
  0.13840000   0.00000894
  0.13840000   0.00000604
  0.13840000   0.00000415
  0.13840000   0.00000292
  0.13840000   0.00000212
  0.13840000   0.00000158
  0.13840000   0.00000123
  0.13840000   0.00000099
  0.13840000   0.00000082
  0.13840000   0.00000071
  0.13840000   0.00000063
  0.13840000   0.00000057
  0.13840000   0.00000052
  0.13840000   0.00000048
  0.13840000   0.00000045
  0.13840000   0.00000043
  0.13840000   0.00000041
  0.13840000   0.00000039
  0.13840000   0.00000037
  0.13860000   0.00002066
  0.13860000   0.00001364
  0.13860000   0.00000909
  0.13860000   0.00000614
  0.13860000   0.00000422
  0.13860000   0.00000297
  0.13860000   0.00000214
  0.13860000   0.00000160
  0.13860000   0.00000124
  0.13860000   0.00000100
  0.13860000   0.00000083
  0.13860000   0.00000071
  0.13860000   0.00000063
  0.13860000   0.00000057
  0.13860000   0.00000052
  0.13860000   0.00000048
  0.13860000   0.00000045
  0.13860000   0.00000043
  0.13860000   0.00000041
  0.13860000   0.00000039
  0.13860000   0.00000037
  0.13880000   0.00002099
  0.13880000   0.00001386
  0.13880000   0.00000924
  0.13880000   0.00000624
  0.13880000   0.00000428
  0.13880000   0.00000301
  0.13880000   0.00000217
  0.13880000   0.00000162
  0.13880000   0.00000125
  0.13880000   0.00000101
  0.13880000   0.00000084
  0.13880000   0.00000072
  0.13880000   0.00000063
  0.13880000   0.00000057
  0.13880000   0.00000052
  0.13880000   0.00000048
  0.13880000   0.00000045
  0.13880000   0.00000043
  0.13880000   0.00000041
  0.13880000   0.00000039
  0.13880000   0.00000037
  0.13900000   0.00002132
  0.13900000   0.00001408
  0.13900000   0.00000939
  0.13900000   0.00000634
  0.13900000   0.00000435
  0.13900000   0.00000305
  0.13900000   0.00000220
  0.13900000   0.00000164
  0.13900000   0.00000127
  0.13900000   0.00000101
  0.13900000   0.00000084
  0.13900000   0.00000072
  0.13900000   0.00000063
  0.13900000   0.00000057
  0.13900000   0.00000052
  0.13900000   0.00000048
  0.13900000   0.00000045
  0.13900000   0.00000043
  0.13900000   0.00000041
  0.13900000   0.00000039
  0.13900000   0.00000037
  0.13900000   0.00000035
  0.13920000   0.00002166
  0.13920000   0.00001431
  0.13920000   0.00000954
  0.13920000   0.00000644
  0.13920000   0.00000442
  0.13920000   0.00000310
  0.13920000   0.00000223
  0.13920000   0.00000166
  0.13920000   0.00000128
  0.13920000   0.00000102
  0.13920000   0.00000085
  0.13920000   0.00000072
  0.13920000   0.00000064
  0.13920000   0.00000057
  0.13920000   0.00000052
  0.13920000   0.00000048
  0.13920000   0.00000045
  0.13920000   0.00000043
  0.13920000   0.00000041
  0.13920000   0.00000039
  0.13920000   0.00000037
  0.13920000   0.00000035
  0.13940000   0.00002201
  0.13940000   0.00001454
  0.13940000   0.00000970
  0.13940000   0.00000654
  0.13940000   0.00000449
  0.13940000   0.00000315
  0.13940000   0.00000226
  0.13940000   0.00000168
  0.13940000   0.00000129
  0.13940000   0.00000103
  0.13940000   0.00000085
  0.13940000   0.00000073
  0.13940000   0.00000064
  0.13940000   0.00000057
  0.13940000   0.00000052
  0.13940000   0.00000049
  0.13940000   0.00000045
  0.13940000   0.00000043
  0.13940000   0.00000041
  0.13940000   0.00000039
  0.13940000   0.00000037
  0.13940000   0.00000035
  0.13960000   0.00002236
  0.13960000   0.00001478
  0.13960000   0.00000986
  0.13960000   0.00000665
  0.13960000   0.00000456
  0.13960000   0.00000319
  0.13960000   0.00000230
  0.13960000   0.00000170
  0.13960000   0.00000131
  0.13960000   0.00000104
  0.13960000   0.00000086
  0.13960000   0.00000073
  0.13960000   0.00000064
  0.13960000   0.00000058
  0.13960000   0.00000052
  0.13960000   0.00000049
  0.13960000   0.00000045
  0.13960000   0.00000043
  0.13960000   0.00000041
  0.13960000   0.00000039
  0.13960000   0.00000037
  0.13960000   0.00000035
  0.13980000   0.00002272
  0.13980000   0.00001502
  0.13980000   0.00001002
  0.13980000   0.00000676
  0.13980000   0.00000463
  0.13980000   0.00000324
  0.13980000   0.00000233
  0.13980000   0.00000172
  0.13980000   0.00000132
  0.13980000   0.00000105
  0.13980000   0.00000086
  0.13980000   0.00000074
  0.13980000   0.00000064
  0.13980000   0.00000058
  0.13980000   0.00000053
  0.13980000   0.00000049
  0.13980000   0.00000045
  0.13980000   0.00000043
  0.13980000   0.00000041
  0.13980000   0.00000039
  0.13980000   0.00000037
  0.13980000   0.00000035
  0.14000000   0.00002308
  0.14000000   0.00001527
  0.14000000   0.00001018
  0.14000000   0.00000687
  0.14000000   0.00000471
  0.14000000   0.00000329
  0.14000000   0.00000236
  0.14000000   0.00000175
  0.14000000   0.00000134
  0.14000000   0.00000106
  0.14000000   0.00000087
  0.14000000   0.00000074
  0.14000000   0.00000065
  0.14000000   0.00000058
  0.14000000   0.00000053
  0.14000000   0.00000049
  0.14000000   0.00000045
  0.14000000   0.00000043
  0.14000000   0.00000041
  0.14000000   0.00000039
  0.14000000   0.00000037
  0.14000000   0.00000035
  0.14020000   0.00002345
  0.14020000   0.00001552
  0.14020000   0.00001035
  0.14020000   0.00000698
  0.14020000   0.00000478
  0.14020000   0.00000334
  0.14020000   0.00000240
  0.14020000   0.00000177
  0.14020000   0.00000135
  0.14020000   0.00000107
  0.14020000   0.00000088
  0.14020000   0.00000074
  0.14020000   0.00000065
  0.14020000   0.00000058
  0.14020000   0.00000053
  0.14020000   0.00000049
  0.14020000   0.00000046
  0.14020000   0.00000043
  0.14020000   0.00000041
  0.14020000   0.00000039
  0.14020000   0.00000037
  0.14020000   0.00000035
  0.14040000   0.00002383
  0.14040000   0.00001577
  0.14040000   0.00001052
  0.14040000   0.00000710
  0.14040000   0.00000486
  0.14040000   0.00000339
  0.14040000   0.00000243
  0.14040000   0.00000179
  0.14040000   0.00000137
  0.14040000   0.00000108
  0.14040000   0.00000088
  0.14040000   0.00000075
  0.14040000   0.00000065
  0.14040000   0.00000058
  0.14040000   0.00000053
  0.14040000   0.00000049
  0.14040000   0.00000046
  0.14040000   0.00000043
  0.14040000   0.00000041
  0.14040000   0.00000039
  0.14040000   0.00000037
  0.14040000   0.00000035
  0.14060000   0.00002421
  0.14060000   0.00001603
  0.14060000   0.00001070
  0.14060000   0.00000722
  0.14060000   0.00000494
  0.14060000   0.00000345
  0.14060000   0.00000247
  0.14060000   0.00000182
  0.14060000   0.00000138
  0.14060000   0.00000109
  0.14060000   0.00000089
  0.14060000   0.00000075
  0.14060000   0.00000065
  0.14060000   0.00000058
  0.14060000   0.00000053
  0.14060000   0.00000049
  0.14060000   0.00000046
  0.14060000   0.00000043
  0.14060000   0.00000041
  0.14060000   0.00000039
  0.14060000   0.00000037
  0.14060000   0.00000035
  0.14080000   0.00002460
  0.14080000   0.00001629
  0.14080000   0.00001087
  0.14080000   0.00000734
  0.14080000   0.00000502
  0.14080000   0.00000350
  0.14080000   0.00000250
  0.14080000   0.00000184
  0.14080000   0.00000140
  0.14080000   0.00000110
  0.14080000   0.00000090
  0.14080000   0.00000076
  0.14080000   0.00000066
  0.14080000   0.00000059
  0.14080000   0.00000053
  0.14080000   0.00000049
  0.14080000   0.00000046
  0.14080000   0.00000043
  0.14080000   0.00000041
  0.14080000   0.00000039
  0.14080000   0.00000037
  0.14080000   0.00000035
  0.14100000   0.00002500
  0.14100000   0.00001656
  0.14100000   0.00001105
  0.14100000   0.00000746
  0.14100000   0.00000510
  0.14100000   0.00000356
  0.14100000   0.00000254
  0.14100000   0.00000186
  0.14100000   0.00000141
  0.14100000   0.00000111
  0.14100000   0.00000091
  0.14100000   0.00000076
  0.14100000   0.00000066
  0.14100000   0.00000059
  0.14100000   0.00000053
  0.14100000   0.00000049
  0.14100000   0.00000046
  0.14100000   0.00000043
  0.14100000   0.00000041
  0.14100000   0.00000039
  0.14100000   0.00000037
  0.14100000   0.00000035
  0.14120000   0.00002540
  0.14120000   0.00001683
  0.14120000   0.00001124
  0.14120000   0.00000758
  0.14120000   0.00000519
  0.14120000   0.00000361
  0.14120000   0.00000258
  0.14120000   0.00000189
  0.14120000   0.00000143
  0.14120000   0.00000112
  0.14120000   0.00000091
  0.14120000   0.00000077
  0.14120000   0.00000066
  0.14120000   0.00000059
  0.14120000   0.00000053
  0.14120000   0.00000049
  0.14120000   0.00000046
  0.14120000   0.00000043
  0.14120000   0.00000041
  0.14120000   0.00000039
  0.14120000   0.00000037
  0.14120000   0.00000035
  0.14140000   0.00002581
  0.14140000   0.00001711
  0.14140000   0.00001143
  0.14140000   0.00000771
  0.14140000   0.00000527
  0.14140000   0.00000367
  0.14140000   0.00000261
  0.14140000   0.00000191
  0.14140000   0.00000145
  0.14140000   0.00000113
  0.14140000   0.00000092
  0.14140000   0.00000077
  0.14140000   0.00000067
  0.14140000   0.00000059
  0.14140000   0.00000054
  0.14140000   0.00000049
  0.14140000   0.00000046
  0.14140000   0.00000043
  0.14140000   0.00000041
  0.14140000   0.00000039
  0.14140000   0.00000037
  0.14140000   0.00000035
  0.14140000   0.00000034
  0.14160000   0.00002622
  0.14160000   0.00001739
  0.14160000   0.00001162
  0.14160000   0.00000784
  0.14160000   0.00000536
  0.14160000   0.00000373
  0.14160000   0.00000265
  0.14160000   0.00000194
  0.14160000   0.00000147
  0.14160000   0.00000115
  0.14160000   0.00000093
  0.14160000   0.00000078
  0.14160000   0.00000067
  0.14160000   0.00000059
  0.14160000   0.00000054
  0.14160000   0.00000049
  0.14160000   0.00000046
  0.14160000   0.00000043
  0.14160000   0.00000041
  0.14160000   0.00000039
  0.14160000   0.00000037
  0.14160000   0.00000035
  0.14160000   0.00000034
  0.14180000   0.00002665
  0.14180000   0.00001768
  0.14180000   0.00001181
  0.14180000   0.00000797
  0.14180000   0.00000545
  0.14180000   0.00000379
  0.14180000   0.00000269
  0.14180000   0.00000197
  0.14180000   0.00000148
  0.14180000   0.00000116
  0.14180000   0.00000094
  0.14180000   0.00000078
  0.14180000   0.00000067
  0.14180000   0.00000060
  0.14180000   0.00000054
  0.14180000   0.00000049
  0.14180000   0.00000046
  0.14180000   0.00000043
  0.14180000   0.00000041
  0.14180000   0.00000039
  0.14180000   0.00000037
  0.14180000   0.00000035
  0.14180000   0.00000034
  0.14200000   0.00002708
  0.14200000   0.00001797
  0.14200000   0.00001201
  0.14200000   0.00000810
  0.14200000   0.00000554
  0.14200000   0.00000385
  0.14200000   0.00000273
  0.14200000   0.00000200
  0.14200000   0.00000150
  0.14200000   0.00000117
  0.14200000   0.00000094
  0.14200000   0.00000079
  0.14200000   0.00000068
  0.14200000   0.00000060
  0.14200000   0.00000054
  0.14200000   0.00000049
  0.14200000   0.00000046
  0.14200000   0.00000043
  0.14200000   0.00000041
  0.14200000   0.00000039
  0.14200000   0.00000037
  0.14200000   0.00000035
  0.14200000   0.00000034
  0.14220000   0.00002752
  0.14220000   0.00001827
  0.14220000   0.00001221
  0.14220000   0.00000824
  0.14220000   0.00000563
  0.14220000   0.00000391
  0.14220000   0.00000278
  0.14220000   0.00000202
  0.14220000   0.00000152
  0.14220000   0.00000118
  0.14220000   0.00000095
  0.14220000   0.00000079
  0.14220000   0.00000068
  0.14220000   0.00000060
  0.14220000   0.00000054
  0.14220000   0.00000050
  0.14220000   0.00000046
  0.14220000   0.00000043
  0.14220000   0.00000041
  0.14220000   0.00000039
  0.14220000   0.00000037
  0.14220000   0.00000035
  0.14220000   0.00000034
  0.14240000   0.00002796
  0.14240000   0.00001857
  0.14240000   0.00001242
  0.14240000   0.00000838
  0.14240000   0.00000572
  0.14240000   0.00000397
  0.14240000   0.00000282
  0.14240000   0.00000205
  0.14240000   0.00000154
  0.14240000   0.00000120
  0.14240000   0.00000096
  0.14240000   0.00000080
  0.14240000   0.00000068
  0.14240000   0.00000060
  0.14240000   0.00000054
  0.14240000   0.00000050
  0.14240000   0.00000046
  0.14240000   0.00000043
  0.14240000   0.00000041
  0.14240000   0.00000039
  0.14240000   0.00000037
  0.14240000   0.00000035
  0.14240000   0.00000034
  0.14260000   0.00002841
  0.14260000   0.00001888
  0.14260000   0.00001262
  0.14260000   0.00000852
  0.14260000   0.00000582
  0.14260000   0.00000404
  0.14260000   0.00000286
  0.14260000   0.00000208
  0.14260000   0.00000156
  0.14260000   0.00000121
  0.14260000   0.00000097
  0.14260000   0.00000080
  0.14260000   0.00000069
  0.14260000   0.00000061
  0.14260000   0.00000054
  0.14260000   0.00000050
  0.14260000   0.00000046
  0.14260000   0.00000043
  0.14260000   0.00000041
  0.14260000   0.00000039
  0.14260000   0.00000037
  0.14260000   0.00000035
  0.14260000   0.00000034
  0.14280000   0.00002887
  0.14280000   0.00001919
  0.14280000   0.00001284
  0.14280000   0.00000866
  0.14280000   0.00000592
  0.14280000   0.00000411
  0.14280000   0.00000291
  0.14280000   0.00000211
  0.14280000   0.00000158
  0.14280000   0.00000122
  0.14280000   0.00000098
  0.14280000   0.00000081
  0.14280000   0.00000069
  0.14280000   0.00000061
  0.14280000   0.00000055
  0.14280000   0.00000050
  0.14280000   0.00000046
  0.14280000   0.00000043
  0.14280000   0.00000041
  0.14280000   0.00000039
  0.14280000   0.00000037
  0.14280000   0.00000035
  0.14280000   0.00000034
  0.14300000   0.00002934
  0.14300000   0.00001951
  0.14300000   0.00001305
  0.14300000   0.00000881
  0.14300000   0.00000602
  0.14300000   0.00000417
  0.14300000   0.00000295
  0.14300000   0.00000214
  0.14300000   0.00000160
  0.14300000   0.00000124
  0.14300000   0.00000099
  0.14300000   0.00000082
  0.14300000   0.00000070
  0.14300000   0.00000061
  0.14300000   0.00000055
  0.14300000   0.00000050
  0.14300000   0.00000046
  0.14300000   0.00000043
  0.14300000   0.00000041
  0.14300000   0.00000039
  0.14300000   0.00000037
  0.14300000   0.00000035
  0.14300000   0.00000034
  0.14320000   0.00002982
  0.14320000   0.00001983
  0.14320000   0.00001327
  0.14320000   0.00000896
  0.14320000   0.00000612
  0.14320000   0.00000424
  0.14320000   0.00000300
  0.14320000   0.00000217
  0.14320000   0.00000162
  0.14320000   0.00000125
  0.14320000   0.00000100
  0.14320000   0.00000082
  0.14320000   0.00000070
  0.14320000   0.00000061
  0.14320000   0.00000055
  0.14320000   0.00000050
  0.14320000   0.00000046
  0.14320000   0.00000043
  0.14320000   0.00000041
  0.14320000   0.00000039
  0.14320000   0.00000037
  0.14320000   0.00000035
  0.14320000   0.00000033
  0.14340000   0.00003030
  0.14340000   0.00002016
  0.14340000   0.00001350
  0.14340000   0.00000911
  0.14340000   0.00000622
  0.14340000   0.00000431
  0.14340000   0.00000305
  0.14340000   0.00000221
  0.14340000   0.00000164
  0.14340000   0.00000126
  0.14340000   0.00000101
  0.14340000   0.00000083
  0.14340000   0.00000070
  0.14340000   0.00000062
  0.14340000   0.00000055
  0.14340000   0.00000050
  0.14340000   0.00000046
  0.14340000   0.00000043
  0.14340000   0.00000041
  0.14340000   0.00000039
  0.14340000   0.00000037
  0.14340000   0.00000035
  0.14340000   0.00000033
  0.14360000   0.00003079
  0.14360000   0.00002050
  0.14360000   0.00001373
  0.14360000   0.00000927
  0.14360000   0.00000633
  0.14360000   0.00000438
  0.14360000   0.00000310
  0.14360000   0.00000224
  0.14360000   0.00000167
  0.14360000   0.00000128
  0.14360000   0.00000102
  0.14360000   0.00000084
  0.14360000   0.00000071
  0.14360000   0.00000062
  0.14360000   0.00000055
  0.14360000   0.00000050
  0.14360000   0.00000046
  0.14360000   0.00000043
  0.14360000   0.00000041
  0.14360000   0.00000039
  0.14360000   0.00000037
  0.14360000   0.00000035
  0.14360000   0.00000033
  0.14360000   0.00000032
  0.14380000   0.00003129
  0.14380000   0.00002084
  0.14380000   0.00001396
  0.14380000   0.00000943
  0.14380000   0.00000644
  0.14380000   0.00000446
  0.14380000   0.00000314
  0.14380000   0.00000227
  0.14380000   0.00000169
  0.14380000   0.00000129
  0.14380000   0.00000103
  0.14380000   0.00000084
  0.14380000   0.00000071
  0.14380000   0.00000062
  0.14380000   0.00000055
  0.14380000   0.00000050
  0.14380000   0.00000046
  0.14380000   0.00000043
  0.14380000   0.00000041
  0.14380000   0.00000039
  0.14380000   0.00000037
  0.14380000   0.00000035
  0.14380000   0.00000033
  0.14380000   0.00000032
  0.14400000   0.00003180
  0.14400000   0.00002119
  0.14400000   0.00001420
  0.14400000   0.00000959
  0.14400000   0.00000655
  0.14400000   0.00000453
  0.14400000   0.00000320
  0.14400000   0.00000231
  0.14400000   0.00000171
  0.14400000   0.00000131
  0.14400000   0.00000104
  0.14400000   0.00000085
  0.14400000   0.00000072
  0.14400000   0.00000062
  0.14400000   0.00000056
  0.14400000   0.00000050
  0.14400000   0.00000047
  0.14400000   0.00000043
  0.14400000   0.00000041
  0.14400000   0.00000039
  0.14400000   0.00000037
  0.14400000   0.00000035
  0.14400000   0.00000033
  0.14400000   0.00000032
  0.14420000   0.00003232
  0.14420000   0.00002154
  0.14420000   0.00001444
  0.14420000   0.00000975
  0.14420000   0.00000666
  0.14420000   0.00000461
  0.14420000   0.00000325
  0.14420000   0.00000234
  0.14420000   0.00000173
  0.14420000   0.00000133
  0.14420000   0.00000105
  0.14420000   0.00000086
  0.14420000   0.00000072
  0.14420000   0.00000063
  0.14420000   0.00000056
  0.14420000   0.00000051
  0.14420000   0.00000047
  0.14420000   0.00000043
  0.14420000   0.00000041
  0.14420000   0.00000039
  0.14420000   0.00000037
  0.14420000   0.00000035
  0.14420000   0.00000033
  0.14420000   0.00000032
  0.14440000   0.00003285
  0.14440000   0.00002190
  0.14440000   0.00001469
  0.14440000   0.00000992
  0.14440000   0.00000677
  0.14440000   0.00000469
  0.14440000   0.00000330
  0.14440000   0.00000238
  0.14440000   0.00000176
  0.14440000   0.00000134
  0.14440000   0.00000106
  0.14440000   0.00000086
  0.14440000   0.00000073
  0.14440000   0.00000063
  0.14440000   0.00000056
  0.14440000   0.00000051
  0.14440000   0.00000047
  0.14440000   0.00000043
  0.14440000   0.00000041
  0.14440000   0.00000039
  0.14440000   0.00000037
  0.14440000   0.00000035
  0.14440000   0.00000033
  0.14460000   0.00003338
  0.14460000   0.00002227
  0.14460000   0.00001494
  0.14460000   0.00001009
  0.14460000   0.00000689
  0.14460000   0.00000476
  0.14460000   0.00000335
  0.14460000   0.00000241
  0.14460000   0.00000178
  0.14460000   0.00000136
  0.14460000   0.00000107
  0.14460000   0.00000087
  0.14460000   0.00000073
  0.14460000   0.00000063
  0.14460000   0.00000056
  0.14460000   0.00000051
  0.14460000   0.00000047
  0.14460000   0.00000043
  0.14460000   0.00000041
  0.14460000   0.00000039
  0.14460000   0.00000037
  0.14460000   0.00000035
  0.14460000   0.00000033
  0.14480000   0.00003393
  0.14480000   0.00002264
  0.14480000   0.00001519
  0.14480000   0.00001027
  0.14480000   0.00000701
  0.14480000   0.00000485
  0.14480000   0.00000341
  0.14480000   0.00000245
  0.14480000   0.00000181
  0.14480000   0.00000138
  0.14480000   0.00000108
  0.14480000   0.00000088
  0.14480000   0.00000074
  0.14480000   0.00000064
  0.14480000   0.00000056
  0.14480000   0.00000051
  0.14480000   0.00000047
  0.14480000   0.00000044
  0.14480000   0.00000041
  0.14480000   0.00000039
  0.14480000   0.00000037
  0.14480000   0.00000035
  0.14480000   0.00000033
  0.14500000   0.00003448
  0.14500000   0.00002302
  0.14500000   0.00001545
  0.14500000   0.00001044
  0.14500000   0.00000713
  0.14500000   0.00000493
  0.14500000   0.00000346
  0.14500000   0.00000249
  0.14500000   0.00000183
  0.14500000   0.00000139
  0.14500000   0.00000109
  0.14500000   0.00000089
  0.14500000   0.00000074
  0.14500000   0.00000064
  0.14500000   0.00000057
  0.14500000   0.00000051
  0.14500000   0.00000047
  0.14500000   0.00000044
  0.14500000   0.00000041
  0.14500000   0.00000039
  0.14500000   0.00000037
  0.14500000   0.00000035
  0.14500000   0.00000033
  0.14520000   0.00003504
  0.14520000   0.00002341
  0.14520000   0.00001572
  0.14520000   0.00001063
  0.14520000   0.00000725
  0.14520000   0.00000501
  0.14520000   0.00000352
  0.14520000   0.00000253
  0.14520000   0.00000186
  0.14520000   0.00000141
  0.14520000   0.00000111
  0.14520000   0.00000089
  0.14520000   0.00000075
  0.14520000   0.00000064
  0.14520000   0.00000057
  0.14520000   0.00000051
  0.14520000   0.00000047
  0.14520000   0.00000044
  0.14520000   0.00000041
  0.14520000   0.00000039
  0.14520000   0.00000037
  0.14520000   0.00000035
  0.14520000   0.00000033
  0.14540000   0.00003561
  0.14540000   0.00002380
  0.14540000   0.00001599
  0.14540000   0.00001081
  0.14540000   0.00000738
  0.14540000   0.00000510
  0.14540000   0.00000358
  0.14540000   0.00000257
  0.14540000   0.00000189
  0.14540000   0.00000143
  0.14540000   0.00000112
  0.14540000   0.00000090
  0.14540000   0.00000075
  0.14540000   0.00000065
  0.14540000   0.00000057
  0.14540000   0.00000051
  0.14540000   0.00000047
  0.14540000   0.00000044
  0.14540000   0.00000041
  0.14540000   0.00000039
  0.14540000   0.00000037
  0.14540000   0.00000035
  0.14540000   0.00000033
  0.14560000   0.00003620
  0.14560000   0.00002420
  0.14560000   0.00001626
  0.14560000   0.00001100
  0.14560000   0.00000751
  0.14560000   0.00000519
  0.14560000   0.00000364
  0.14560000   0.00000261
  0.14560000   0.00000192
  0.14560000   0.00000145
  0.14560000   0.00000113
  0.14560000   0.00000091
  0.14560000   0.00000076
  0.14560000   0.00000065
  0.14560000   0.00000057
  0.14560000   0.00000052
  0.14560000   0.00000047
  0.14560000   0.00000044
  0.14560000   0.00000041
  0.14560000   0.00000039
  0.14560000   0.00000037
  0.14560000   0.00000035
  0.14560000   0.00000033
  0.14580000   0.00003679
  0.14580000   0.00002461
  0.14580000   0.00001654
  0.14580000   0.00001119
  0.14580000   0.00000764
  0.14580000   0.00000528
  0.14580000   0.00000370
  0.14580000   0.00000265
  0.14580000   0.00000194
  0.14580000   0.00000147
  0.14580000   0.00000114
  0.14580000   0.00000092
  0.14580000   0.00000077
  0.14580000   0.00000066
  0.14580000   0.00000058
  0.14580000   0.00000052
  0.14580000   0.00000047
  0.14580000   0.00000044
  0.14580000   0.00000041
  0.14580000   0.00000039
  0.14580000   0.00000037
  0.14580000   0.00000035
  0.14580000   0.00000033
  0.14600000   0.00003739
  0.14600000   0.00002502
  0.14600000   0.00001683
  0.14600000   0.00001139
  0.14600000   0.00000777
  0.14600000   0.00000537
  0.14600000   0.00000376
  0.14600000   0.00000269
  0.14600000   0.00000197
  0.14600000   0.00000149
  0.14600000   0.00000116
  0.14600000   0.00000093
  0.14600000   0.00000077
  0.14600000   0.00000066
  0.14600000   0.00000058
  0.14600000   0.00000052
  0.14600000   0.00000047
  0.14600000   0.00000044
  0.14600000   0.00000041
  0.14600000   0.00000039
  0.14600000   0.00000037
  0.14600000   0.00000035
  0.14600000   0.00000033
  0.14620000   0.00003800
  0.14620000   0.00002545
  0.14620000   0.00001712
  0.14620000   0.00001158
  0.14620000   0.00000791
  0.14620000   0.00000546
  0.14620000   0.00000383
  0.14620000   0.00000274
  0.14620000   0.00000200
  0.14620000   0.00000151
  0.14620000   0.00000117
  0.14620000   0.00000094
  0.14620000   0.00000078
  0.14620000   0.00000066
  0.14620000   0.00000058
  0.14620000   0.00000052
  0.14620000   0.00000048
  0.14620000   0.00000044
  0.14620000   0.00000041
  0.14620000   0.00000039
  0.14620000   0.00000037
  0.14620000   0.00000035
  0.14620000   0.00000033
  0.14640000   0.00003862
  0.14640000   0.00002587
  0.14640000   0.00001741
  0.14640000   0.00001179
  0.14640000   0.00000805
  0.14640000   0.00000556
  0.14640000   0.00000389
  0.14640000   0.00000278
  0.14640000   0.00000203
  0.14640000   0.00000153
  0.14640000   0.00000118
  0.14640000   0.00000095
  0.14640000   0.00000078
  0.14640000   0.00000067
  0.14640000   0.00000058
  0.14640000   0.00000052
  0.14640000   0.00000048
  0.14640000   0.00000044
  0.14640000   0.00000041
  0.14640000   0.00000039
  0.14640000   0.00000037
  0.14640000   0.00000035
  0.14640000   0.00000033
  0.14660000   0.00003926
  0.14660000   0.00002631
  0.14660000   0.00001771
  0.14660000   0.00001199
  0.14660000   0.00000819
  0.14660000   0.00000565
  0.14660000   0.00000396
  0.14660000   0.00000283
  0.14660000   0.00000206
  0.14660000   0.00000155
  0.14660000   0.00000120
  0.14660000   0.00000096
  0.14660000   0.00000079
  0.14660000   0.00000067
  0.14660000   0.00000059
  0.14660000   0.00000052
  0.14660000   0.00000048
  0.14660000   0.00000044
  0.14660000   0.00000041
  0.14660000   0.00000039
  0.14660000   0.00000037
  0.14660000   0.00000035
  0.14660000   0.00000033
  0.14680000   0.00003990
  0.14680000   0.00002676
  0.14680000   0.00001802
  0.14680000   0.00001220
  0.14680000   0.00000833
  0.14680000   0.00000575
  0.14680000   0.00000403
  0.14680000   0.00000287
  0.14680000   0.00000209
  0.14680000   0.00000157
  0.14680000   0.00000121
  0.14680000   0.00000097
  0.14680000   0.00000080
  0.14680000   0.00000068
  0.14680000   0.00000059
  0.14680000   0.00000053
  0.14680000   0.00000048
  0.14680000   0.00000044
  0.14680000   0.00000041
  0.14680000   0.00000039
  0.14680000   0.00000037
  0.14680000   0.00000035
  0.14680000   0.00000033
  0.14700000   0.00004056
  0.14700000   0.00002721
  0.14700000   0.00001833
  0.14700000   0.00001242
  0.14700000   0.00000848
  0.14700000   0.00000585
  0.14700000   0.00000410
  0.14700000   0.00000292
  0.14700000   0.00000213
  0.14700000   0.00000159
  0.14700000   0.00000123
  0.14700000   0.00000098
  0.14700000   0.00000080
  0.14700000   0.00000068
  0.14700000   0.00000059
  0.14700000   0.00000053
  0.14700000   0.00000048
  0.14700000   0.00000044
  0.14700000   0.00000041
  0.14700000   0.00000039
  0.14700000   0.00000037
  0.14700000   0.00000035
  0.14700000   0.00000033
  0.14720000   0.00004122
  0.14720000   0.00002767
  0.14720000   0.00001865
  0.14720000   0.00001264
  0.14720000   0.00000863
  0.14720000   0.00000596
  0.14720000   0.00000417
  0.14720000   0.00000297
  0.14720000   0.00000216
  0.14720000   0.00000161
  0.14720000   0.00000124
  0.14720000   0.00000099
  0.14720000   0.00000081
  0.14720000   0.00000069
  0.14720000   0.00000060
  0.14720000   0.00000053
  0.14720000   0.00000048
  0.14720000   0.00000044
  0.14720000   0.00000041
  0.14720000   0.00000039
  0.14720000   0.00000037
  0.14720000   0.00000035
  0.14720000   0.00000033
  0.14740000   0.00004190
  0.14740000   0.00002814
  0.14740000   0.00001897
  0.14740000   0.00001286
  0.14740000   0.00000878
  0.14740000   0.00000606
  0.14740000   0.00000424
  0.14740000   0.00000302
  0.14740000   0.00000219
  0.14740000   0.00000164
  0.14740000   0.00000126
  0.14740000   0.00000100
  0.14740000   0.00000082
  0.14740000   0.00000069
  0.14740000   0.00000060
  0.14740000   0.00000053
  0.14740000   0.00000048
  0.14740000   0.00000044
  0.14740000   0.00000041
  0.14740000   0.00000039
  0.14740000   0.00000037
  0.14740000   0.00000035
  0.14740000   0.00000033
  0.14760000   0.00004259
  0.14760000   0.00002861
  0.14760000   0.00001930
  0.14760000   0.00001309
  0.14760000   0.00000894
  0.14760000   0.00000617
  0.14760000   0.00000431
  0.14760000   0.00000307
  0.14760000   0.00000223
  0.14760000   0.00000166
  0.14760000   0.00000127
  0.14760000   0.00000101
  0.14760000   0.00000083
  0.14760000   0.00000070
  0.14760000   0.00000060
  0.14760000   0.00000054
  0.14760000   0.00000048
  0.14760000   0.00000045
  0.14760000   0.00000041
  0.14760000   0.00000039
  0.14760000   0.00000037
  0.14760000   0.00000035
  0.14760000   0.00000033
  0.14780000   0.00004329
  0.14780000   0.00002910
  0.14780000   0.00001963
  0.14780000   0.00001332
  0.14780000   0.00000910
  0.14780000   0.00000628
  0.14780000   0.00000439
  0.14780000   0.00000312
  0.14780000   0.00000226
  0.14780000   0.00000169
  0.14780000   0.00000129
  0.14780000   0.00000102
  0.14780000   0.00000083
  0.14780000   0.00000070
  0.14780000   0.00000061
  0.14780000   0.00000054
  0.14780000   0.00000049
  0.14780000   0.00000045
  0.14780000   0.00000041
  0.14780000   0.00000039
  0.14780000   0.00000037
  0.14780000   0.00000035
  0.14780000   0.00000033
  0.14800000   0.00004400
  0.14800000   0.00002959
  0.14800000   0.00001998
  0.14800000   0.00001356
  0.14800000   0.00000926
  0.14800000   0.00000639
  0.14800000   0.00000447
  0.14800000   0.00000317
  0.14800000   0.00000230
  0.14800000   0.00000171
  0.14800000   0.00000131
  0.14800000   0.00000103
  0.14800000   0.00000084
  0.14800000   0.00000071
  0.14800000   0.00000061
  0.14800000   0.00000054
  0.14800000   0.00000049
  0.14800000   0.00000045
  0.14800000   0.00000042
  0.14800000   0.00000039
  0.14800000   0.00000037
  0.14800000   0.00000035
  0.14800000   0.00000033
  0.14820000   0.00004472
  0.14820000   0.00003009
  0.14820000   0.00002032
  0.14820000   0.00001380
  0.14820000   0.00000943
  0.14820000   0.00000651
  0.14820000   0.00000454
  0.14820000   0.00000323
  0.14820000   0.00000234
  0.14820000   0.00000174
  0.14820000   0.00000133
  0.14820000   0.00000104
  0.14820000   0.00000085
  0.14820000   0.00000071
  0.14820000   0.00000061
  0.14820000   0.00000054
  0.14820000   0.00000049
  0.14820000   0.00000045
  0.14820000   0.00000042
  0.14820000   0.00000039
  0.14820000   0.00000037
  0.14820000   0.00000035
  0.14820000   0.00000033
  0.14840000   0.00004546
  0.14840000   0.00003060
  0.14840000   0.00002068
  0.14840000   0.00001404
  0.14840000   0.00000960
  0.14840000   0.00000662
  0.14840000   0.00000463
  0.14840000   0.00000328
  0.14840000   0.00000238
  0.14840000   0.00000176
  0.14840000   0.00000134
  0.14840000   0.00000106
  0.14840000   0.00000086
  0.14840000   0.00000072
  0.14840000   0.00000062
  0.14840000   0.00000054
  0.14840000   0.00000049
  0.14840000   0.00000045
  0.14840000   0.00000042
  0.14840000   0.00000039
  0.14840000   0.00000037
  0.14840000   0.00000035
  0.14840000   0.00000033
  0.14860000   0.00004621
  0.14860000   0.00003112
  0.14860000   0.00002104
  0.14860000   0.00001429
  0.14860000   0.00000977
  0.14860000   0.00000674
  0.14860000   0.00000471
  0.14860000   0.00000334
  0.14860000   0.00000241
  0.14860000   0.00000179
  0.14860000   0.00000136
  0.14860000   0.00000107
  0.14860000   0.00000087
  0.14860000   0.00000072
  0.14860000   0.00000062
  0.14860000   0.00000055
  0.14860000   0.00000049
  0.14860000   0.00000045
  0.14860000   0.00000042
  0.14860000   0.00000039
  0.14860000   0.00000037
  0.14860000   0.00000035
  0.14860000   0.00000033
  0.14880000   0.00004697
  0.14880000   0.00003165
  0.14880000   0.00002141
  0.14880000   0.00001454
  0.14880000   0.00000995
  0.14880000   0.00000686
  0.14880000   0.00000479
  0.14880000   0.00000340
  0.14880000   0.00000245
  0.14880000   0.00000182
  0.14880000   0.00000138
  0.14880000   0.00000108
  0.14880000   0.00000087
  0.14880000   0.00000073
  0.14880000   0.00000062
  0.14880000   0.00000055
  0.14880000   0.00000049
  0.14880000   0.00000045
  0.14880000   0.00000042
  0.14880000   0.00000039
  0.14880000   0.00000037
  0.14880000   0.00000035
  0.14880000   0.00000033
  0.14900000   0.00004774
  0.14900000   0.00003219
  0.14900000   0.00002178
  0.14900000   0.00001480
  0.14900000   0.00001013
  0.14900000   0.00000699
  0.14900000   0.00000488
  0.14900000   0.00000345
  0.14900000   0.00000249
  0.14900000   0.00000184
  0.14900000   0.00000140
  0.14900000   0.00000109
  0.14900000   0.00000088
  0.14900000   0.00000073
  0.14900000   0.00000063
  0.14900000   0.00000055
  0.14900000   0.00000050
  0.14900000   0.00000045
  0.14900000   0.00000042
  0.14900000   0.00000039
  0.14900000   0.00000037
  0.14900000   0.00000035
  0.14900000   0.00000033
  0.14920000   0.00004853
  0.14920000   0.00003274
  0.14920000   0.00002216
  0.14920000   0.00001507
  0.14920000   0.00001031
  0.14920000   0.00000711
  0.14920000   0.00000496
  0.14920000   0.00000352
  0.14920000   0.00000254
  0.14920000   0.00000187
  0.14920000   0.00000142
  0.14920000   0.00000111
  0.14920000   0.00000089
  0.14920000   0.00000074
  0.14920000   0.00000063
  0.14920000   0.00000056
  0.14920000   0.00000050
  0.14920000   0.00000045
  0.14920000   0.00000042
  0.14920000   0.00000039
  0.14920000   0.00000037
  0.14920000   0.00000035
  0.14920000   0.00000033
  0.14940000   0.00004933
  0.14940000   0.00003330
  0.14940000   0.00002255
  0.14940000   0.00001534
  0.14940000   0.00001050
  0.14940000   0.00000724
  0.14940000   0.00000505
  0.14940000   0.00000358
  0.14940000   0.00000258
  0.14940000   0.00000190
  0.14940000   0.00000144
  0.14940000   0.00000112
  0.14940000   0.00000090
  0.14940000   0.00000075
  0.14940000   0.00000064
  0.14940000   0.00000056
  0.14940000   0.00000050
  0.14940000   0.00000045
  0.14940000   0.00000042
  0.14940000   0.00000039
  0.14940000   0.00000037
  0.14940000   0.00000035
  0.14940000   0.00000033
  0.14960000   0.00005014
  0.14960000   0.00003386
  0.14960000   0.00002294
  0.14960000   0.00001561
  0.14960000   0.00001069
  0.14960000   0.00000737
  0.14960000   0.00000514
  0.14960000   0.00000364
  0.14960000   0.00000262
  0.14960000   0.00000193
  0.14960000   0.00000146
  0.14960000   0.00000114
  0.14960000   0.00000091
  0.14960000   0.00000075
  0.14960000   0.00000064
  0.14960000   0.00000056
  0.14960000   0.00000050
  0.14960000   0.00000046
  0.14960000   0.00000042
  0.14960000   0.00000039
  0.14960000   0.00000037
  0.14960000   0.00000035
  0.14960000   0.00000033
  0.14980000   0.00005097
  0.14980000   0.00003444
  0.14980000   0.00002334
  0.14980000   0.00001589
  0.14980000   0.00001088
  0.14980000   0.00000751
  0.14980000   0.00000524
  0.14980000   0.00000370
  0.14980000   0.00000267
  0.14980000   0.00000196
  0.14980000   0.00000148
  0.14980000   0.00000115
  0.14980000   0.00000092
  0.14980000   0.00000076
  0.14980000   0.00000065
  0.14980000   0.00000056
  0.14980000   0.00000050
  0.14980000   0.00000046
  0.14980000   0.00000042
  0.14980000   0.00000039
  0.14980000   0.00000037
  0.14980000   0.00000035
  0.14980000   0.00000033
  0.15000000   0.00005181
  0.15000000   0.00003503
  0.15000000   0.00002375
  0.15000000   0.00001618
  0.15000000   0.00001108
  0.15000000   0.00000765
  0.15000000   0.00000533
  0.15000000   0.00000377
  0.15000000   0.00000271
  0.15000000   0.00000199
  0.15000000   0.00000150
  0.15000000   0.00000116
  0.15000000   0.00000093
  0.15000000   0.00000077
  0.15000000   0.00000065
  0.15000000   0.00000057
  0.15000000   0.00000051
  0.15000000   0.00000046
  0.15000000   0.00000042
  0.15000000   0.00000039
  0.15000000   0.00000037
  0.15000000   0.00000035
  0.15000000   0.00000033
  0.15020000   0.00005267
  0.15020000   0.00003563
  0.15020000   0.00002417
  0.15020000   0.00001647
  0.15020000   0.00001128
  0.15020000   0.00000779
  0.15020000   0.00000543
  0.15020000   0.00000384
  0.15020000   0.00000276
  0.15020000   0.00000202
  0.15020000   0.00000152
  0.15020000   0.00000118
  0.15020000   0.00000094
  0.15020000   0.00000077
  0.15020000   0.00000066
  0.15020000   0.00000057
  0.15020000   0.00000051
  0.15020000   0.00000046
  0.15020000   0.00000042
  0.15020000   0.00000039
  0.15020000   0.00000037
  0.15020000   0.00000035
  0.15020000   0.00000033
  0.15040000   0.00005354
  0.15040000   0.00003623
  0.15040000   0.00002460
  0.15040000   0.00001676
  0.15040000   0.00001149
  0.15040000   0.00000793
  0.15040000   0.00000553
  0.15040000   0.00000391
  0.15040000   0.00000281
  0.15040000   0.00000206
  0.15040000   0.00000155
  0.15040000   0.00000119
  0.15040000   0.00000095
  0.15040000   0.00000078
  0.15040000   0.00000066
  0.15040000   0.00000057
  0.15040000   0.00000051
  0.15040000   0.00000046
  0.15040000   0.00000042
  0.15040000   0.00000039
  0.15040000   0.00000037
  0.15040000   0.00000035
  0.15040000   0.00000033
  0.15060000   0.00005442
  0.15060000   0.00003685
  0.15060000   0.00002503
  0.15060000   0.00001706
  0.15060000   0.00001170
  0.15060000   0.00000808
  0.15060000   0.00000563
  0.15060000   0.00000398
  0.15060000   0.00000285
  0.15060000   0.00000209
  0.15060000   0.00000157
  0.15060000   0.00000121
  0.15060000   0.00000096
  0.15060000   0.00000079
  0.15060000   0.00000067
  0.15060000   0.00000058
  0.15060000   0.00000051
  0.15060000   0.00000046
  0.15060000   0.00000043
  0.15060000   0.00000040
  0.15060000   0.00000037
  0.15060000   0.00000035
  0.15060000   0.00000033
  0.15080000   0.00005532
  0.15080000   0.00003748
  0.15080000   0.00002547
  0.15080000   0.00001737
  0.15080000   0.00001191
  0.15080000   0.00000822
  0.15080000   0.00000573
  0.15080000   0.00000405
  0.15080000   0.00000290
  0.15080000   0.00000212
  0.15080000   0.00000159
  0.15080000   0.00000123
  0.15080000   0.00000097
  0.15080000   0.00000080
  0.15080000   0.00000067
  0.15080000   0.00000058
  0.15080000   0.00000051
  0.15080000   0.00000046
  0.15080000   0.00000043
  0.15080000   0.00000040
  0.15080000   0.00000037
  0.15080000   0.00000035
  0.15080000   0.00000033
  0.15100000   0.00005624
  0.15100000   0.00003813
  0.15100000   0.00002592
  0.15100000   0.00001768
  0.15100000   0.00001213
  0.15100000   0.00000838
  0.15100000   0.00000584
  0.15100000   0.00000412
  0.15100000   0.00000295
  0.15100000   0.00000216
  0.15100000   0.00000162
  0.15100000   0.00000124
  0.15100000   0.00000099
  0.15100000   0.00000080
  0.15100000   0.00000068
  0.15100000   0.00000058
  0.15100000   0.00000052
  0.15100000   0.00000047
  0.15100000   0.00000043
  0.15100000   0.00000040
  0.15100000   0.00000037
  0.15100000   0.00000035
  0.15100000   0.00000033
  0.15120000   0.00005717
  0.15120000   0.00003878
  0.15120000   0.00002637
  0.15120000   0.00001800
  0.15120000   0.00001235
  0.15120000   0.00000853
  0.15120000   0.00000595
  0.15120000   0.00000420
  0.15120000   0.00000301
  0.15120000   0.00000220
  0.15120000   0.00000164
  0.15120000   0.00000126
  0.15120000   0.00000100
  0.15120000   0.00000081
  0.15120000   0.00000068
  0.15120000   0.00000059
  0.15120000   0.00000052
  0.15120000   0.00000047
  0.15120000   0.00000043
  0.15120000   0.00000040
  0.15120000   0.00000037
  0.15120000   0.00000035
  0.15120000   0.00000033
  0.15140000   0.00005812
  0.15140000   0.00003944
  0.15140000   0.00002684
  0.15140000   0.00001833
  0.15140000   0.00001258
  0.15140000   0.00000869
  0.15140000   0.00000606
  0.15140000   0.00000427
  0.15140000   0.00000306
  0.15140000   0.00000223
  0.15140000   0.00000167
  0.15140000   0.00000128
  0.15140000   0.00000101
  0.15140000   0.00000082
  0.15140000   0.00000069
  0.15140000   0.00000059
  0.15140000   0.00000052
  0.15140000   0.00000047
  0.15140000   0.00000043
  0.15140000   0.00000040
  0.15140000   0.00000037
  0.15140000   0.00000035
  0.15140000   0.00000033
  0.15160000   0.00005908
  0.15160000   0.00004012
  0.15160000   0.00002731
  0.15160000   0.00001866
  0.15160000   0.00001281
  0.15160000   0.00000885
  0.15160000   0.00000617
  0.15160000   0.00000435
  0.15160000   0.00000311
  0.15160000   0.00000227
  0.15160000   0.00000169
  0.15160000   0.00000130
  0.15160000   0.00000102
  0.15160000   0.00000083
  0.15160000   0.00000069
  0.15160000   0.00000060
  0.15160000   0.00000052
  0.15160000   0.00000047
  0.15160000   0.00000043
  0.15160000   0.00000040
  0.15160000   0.00000037
  0.15160000   0.00000035
  0.15160000   0.00000033
  0.15180000   0.00006006
  0.15180000   0.00004081
  0.15180000   0.00002779
  0.15180000   0.00001900
  0.15180000   0.00001304
  0.15180000   0.00000902
  0.15180000   0.00000628
  0.15180000   0.00000443
  0.15180000   0.00000317
  0.15180000   0.00000231
  0.15180000   0.00000172
  0.15180000   0.00000131
  0.15180000   0.00000103
  0.15180000   0.00000084
  0.15180000   0.00000070
  0.15180000   0.00000060
  0.15180000   0.00000053
  0.15180000   0.00000047
  0.15180000   0.00000043
  0.15180000   0.00000040
  0.15180000   0.00000037
  0.15180000   0.00000035
  0.15180000   0.00000033
  0.15200000   0.00006105
  0.15200000   0.00004150
  0.15200000   0.00002828
  0.15200000   0.00001934
  0.15200000   0.00001329
  0.15200000   0.00000918
  0.15200000   0.00000640
  0.15200000   0.00000451
  0.15200000   0.00000323
  0.15200000   0.00000235
  0.15200000   0.00000175
  0.15200000   0.00000133
  0.15200000   0.00000105
  0.15200000   0.00000085
  0.15200000   0.00000071
  0.15200000   0.00000060
  0.15200000   0.00000053
  0.15200000   0.00000047
  0.15200000   0.00000043
  0.15200000   0.00000040
  0.15200000   0.00000037
  0.15200000   0.00000035
  0.15200000   0.00000033
  0.15220000   0.00006207
  0.15220000   0.00004222
  0.15220000   0.00002878
  0.15220000   0.00001969
  0.15220000   0.00001353
  0.15220000   0.00000936
  0.15220000   0.00000652
  0.15220000   0.00000460
  0.15220000   0.00000328
  0.15220000   0.00000239
  0.15220000   0.00000178
  0.15220000   0.00000135
  0.15220000   0.00000106
  0.15220000   0.00000086
  0.15220000   0.00000071
  0.15220000   0.00000061
  0.15220000   0.00000053
  0.15220000   0.00000048
  0.15220000   0.00000043
  0.15220000   0.00000040
  0.15220000   0.00000037
  0.15220000   0.00000035
  0.15220000   0.00000033
  0.15240000   0.00006310
  0.15240000   0.00004294
  0.15240000   0.00002929
  0.15240000   0.00002005
  0.15240000   0.00001378
  0.15240000   0.00000953
  0.15240000   0.00000664
  0.15240000   0.00000468
  0.15240000   0.00000334
  0.15240000   0.00000243
  0.15240000   0.00000180
  0.15240000   0.00000137
  0.15240000   0.00000107
  0.15240000   0.00000087
  0.15240000   0.00000072
  0.15240000   0.00000061
  0.15240000   0.00000054
  0.15240000   0.00000048
  0.15240000   0.00000044
  0.15240000   0.00000040
  0.15240000   0.00000037
  0.15240000   0.00000035
  0.15240000   0.00000033
  0.15260000   0.00006414
  0.15260000   0.00004368
  0.15260000   0.00002981
  0.15260000   0.00002041
  0.15260000   0.00001404
  0.15260000   0.00000971
  0.15260000   0.00000677
  0.15260000   0.00000477
  0.15260000   0.00000340
  0.15260000   0.00000247
  0.15260000   0.00000183
  0.15260000   0.00000139
  0.15260000   0.00000109
  0.15260000   0.00000088
  0.15260000   0.00000072
  0.15260000   0.00000062
  0.15260000   0.00000054
  0.15260000   0.00000048
  0.15260000   0.00000044
  0.15260000   0.00000040
  0.15260000   0.00000038
  0.15260000   0.00000035
  0.15260000   0.00000033
  0.15280000   0.00006521
  0.15280000   0.00004443
  0.15280000   0.00003034
  0.15280000   0.00002078
  0.15280000   0.00001430
  0.15280000   0.00000989
  0.15280000   0.00000690
  0.15280000   0.00000486
  0.15280000   0.00000347
  0.15280000   0.00000252
  0.15280000   0.00000186
  0.15280000   0.00000141
  0.15280000   0.00000110
  0.15280000   0.00000089
  0.15280000   0.00000073
  0.15280000   0.00000062
  0.15280000   0.00000054
  0.15280000   0.00000048
  0.15280000   0.00000044
  0.15280000   0.00000040
  0.15280000   0.00000038
  0.15280000   0.00000035
  0.15280000   0.00000033
  0.15300000   0.00006629
  0.15300000   0.00004519
  0.15300000   0.00003088
  0.15300000   0.00002116
  0.15300000   0.00001456
  0.15300000   0.00001008
  0.15300000   0.00000703
  0.15300000   0.00000495
  0.15300000   0.00000353
  0.15300000   0.00000256
  0.15300000   0.00000189
  0.15300000   0.00000144
  0.15300000   0.00000112
  0.15300000   0.00000090
  0.15300000   0.00000074
  0.15300000   0.00000063
  0.15300000   0.00000055
  0.15300000   0.00000049
  0.15300000   0.00000044
  0.15300000   0.00000040
  0.15300000   0.00000038
  0.15300000   0.00000035
  0.15300000   0.00000033
  0.15320000   0.00006739
  0.15320000   0.00004597
  0.15320000   0.00003143
  0.15320000   0.00002155
  0.15320000   0.00001483
  0.15320000   0.00001027
  0.15320000   0.00000716
  0.15320000   0.00000504
  0.15320000   0.00000359
  0.15320000   0.00000261
  0.15320000   0.00000193
  0.15320000   0.00000146
  0.15320000   0.00000113
  0.15320000   0.00000091
  0.15320000   0.00000075
  0.15320000   0.00000063
  0.15320000   0.00000055
  0.15320000   0.00000049
  0.15320000   0.00000044
  0.15320000   0.00000041
  0.15320000   0.00000038
  0.15320000   0.00000035
  0.15320000   0.00000033
  0.15340000   0.00006851
  0.15340000   0.00004676
  0.15340000   0.00003198
  0.15340000   0.00002194
  0.15340000   0.00001511
  0.15340000   0.00001046
  0.15340000   0.00000730
  0.15340000   0.00000514
  0.15340000   0.00000366
  0.15340000   0.00000265
  0.15340000   0.00000196
  0.15340000   0.00000148
  0.15340000   0.00000115
  0.15340000   0.00000092
  0.15340000   0.00000075
  0.15340000   0.00000064
  0.15340000   0.00000055
  0.15340000   0.00000049
  0.15340000   0.00000044
  0.15340000   0.00000041
  0.15340000   0.00000038
  0.15340000   0.00000035
  0.15340000   0.00000033
  0.15360000   0.00006965
  0.15360000   0.00004757
  0.15360000   0.00003255
  0.15360000   0.00002234
  0.15360000   0.00001539
  0.15360000   0.00001066
  0.15360000   0.00000743
  0.15360000   0.00000523
  0.15360000   0.00000373
  0.15360000   0.00000270
  0.15360000   0.00000199
  0.15360000   0.00000150
  0.15360000   0.00000116
  0.15360000   0.00000093
  0.15360000   0.00000076
  0.15360000   0.00000064
  0.15360000   0.00000056
  0.15360000   0.00000049
  0.15360000   0.00000044
  0.15360000   0.00000041
  0.15360000   0.00000038
  0.15360000   0.00000035
  0.15360000   0.00000033
  0.15380000   0.00007081
  0.15380000   0.00004838
  0.15380000   0.00003313
  0.15380000   0.00002275
  0.15380000   0.00001568
  0.15380000   0.00001086
  0.15380000   0.00000758
  0.15380000   0.00000533
  0.15380000   0.00000380
  0.15380000   0.00000275
  0.15380000   0.00000203
  0.15380000   0.00000153
  0.15380000   0.00000118
  0.15380000   0.00000094
  0.15380000   0.00000077
  0.15380000   0.00000065
  0.15380000   0.00000056
  0.15380000   0.00000049
  0.15380000   0.00000045
  0.15380000   0.00000041
  0.15380000   0.00000038
  0.15380000   0.00000035
  0.15380000   0.00000033
  0.15400000   0.00007198
  0.15400000   0.00004922
  0.15400000   0.00003372
  0.15400000   0.00002316
  0.15400000   0.00001597
  0.15400000   0.00001107
  0.15400000   0.00000772
  0.15400000   0.00000543
  0.15400000   0.00000387
  0.15400000   0.00000280
  0.15400000   0.00000206
  0.15400000   0.00000155
  0.15400000   0.00000120
  0.15400000   0.00000095
  0.15400000   0.00000078
  0.15400000   0.00000065
  0.15400000   0.00000056
  0.15400000   0.00000050
  0.15400000   0.00000045
  0.15400000   0.00000041
  0.15400000   0.00000038
  0.15400000   0.00000036
  0.15400000   0.00000034
  0.15420000   0.00007318
  0.15420000   0.00005007
  0.15420000   0.00003432
  0.15420000   0.00002359
  0.15420000   0.00001627
  0.15420000   0.00001128
  0.15420000   0.00000787
  0.15420000   0.00000554
  0.15420000   0.00000394
  0.15420000   0.00000285
  0.15420000   0.00000210
  0.15420000   0.00000158
  0.15420000   0.00000121
  0.15420000   0.00000096
  0.15420000   0.00000079
  0.15420000   0.00000066
  0.15420000   0.00000057
  0.15420000   0.00000050
  0.15420000   0.00000045
  0.15420000   0.00000041
  0.15420000   0.00000038
  0.15420000   0.00000036
  0.15420000   0.00000034
  0.15440000   0.00007440
  0.15440000   0.00005093
  0.15440000   0.00003493
  0.15440000   0.00002402
  0.15440000   0.00001657
  0.15440000   0.00001149
  0.15440000   0.00000802
  0.15440000   0.00000564
  0.15440000   0.00000402
  0.15440000   0.00000290
  0.15440000   0.00000213
  0.15440000   0.00000160
  0.15440000   0.00000123
  0.15440000   0.00000098
  0.15440000   0.00000079
  0.15440000   0.00000066
  0.15440000   0.00000057
  0.15440000   0.00000050
  0.15440000   0.00000045
  0.15440000   0.00000041
  0.15440000   0.00000038
  0.15440000   0.00000036
  0.15440000   0.00000034
  0.15460000   0.00007564
  0.15460000   0.00005181
  0.15460000   0.00003555
  0.15460000   0.00002446
  0.15460000   0.00001688
  0.15460000   0.00001171
  0.15460000   0.00000817
  0.15460000   0.00000575
  0.15460000   0.00000409
  0.15460000   0.00000295
  0.15460000   0.00000217
  0.15460000   0.00000163
  0.15460000   0.00000125
  0.15460000   0.00000099
  0.15460000   0.00000080
  0.15460000   0.00000067
  0.15460000   0.00000058
  0.15460000   0.00000051
  0.15460000   0.00000045
  0.15460000   0.00000041
  0.15460000   0.00000038
  0.15460000   0.00000036
  0.15460000   0.00000034
  0.15480000   0.00007690
  0.15480000   0.00005270
  0.15480000   0.00003618
  0.15480000   0.00002490
  0.15480000   0.00001720
  0.15480000   0.00001193
  0.15480000   0.00000833
  0.15480000   0.00000586
  0.15480000   0.00000417
  0.15480000   0.00000301
  0.15480000   0.00000221
  0.15480000   0.00000165
  0.15480000   0.00000127
  0.15480000   0.00000100
  0.15480000   0.00000081
  0.15480000   0.00000068
  0.15480000   0.00000058
  0.15480000   0.00000051
  0.15480000   0.00000046
  0.15480000   0.00000041
  0.15480000   0.00000038
  0.15480000   0.00000036
  0.15480000   0.00000034
  0.15500000   0.00007818
  0.15500000   0.00005361
  0.15500000   0.00003683
  0.15500000   0.00002536
  0.15500000   0.00001752
  0.15500000   0.00001216
  0.15500000   0.00000849
  0.15500000   0.00000598
  0.15500000   0.00000425
  0.15500000   0.00000306
  0.15500000   0.00000225
  0.15500000   0.00000168
  0.15500000   0.00000129
  0.15500000   0.00000101
  0.15500000   0.00000082
  0.15500000   0.00000068
  0.15500000   0.00000058
  0.15500000   0.00000051
  0.15500000   0.00000046
  0.15500000   0.00000042
  0.15500000   0.00000038
  0.15500000   0.00000036
  0.15500000   0.00000034
  0.15520000   0.00007948
  0.15520000   0.00005454
  0.15520000   0.00003748
  0.15520000   0.00002583
  0.15520000   0.00001785
  0.15520000   0.00001239
  0.15520000   0.00000865
  0.15520000   0.00000609
  0.15520000   0.00000433
  0.15520000   0.00000312
  0.15520000   0.00000229
  0.15520000   0.00000171
  0.15520000   0.00000131
  0.15520000   0.00000103
  0.15520000   0.00000083
  0.15520000   0.00000069
  0.15520000   0.00000059
  0.15520000   0.00000051
  0.15520000   0.00000046
  0.15520000   0.00000042
  0.15520000   0.00000038
  0.15520000   0.00000036
  0.15520000   0.00000034
  0.15540000   0.00008080
  0.15540000   0.00005548
  0.15540000   0.00003815
  0.15540000   0.00002630
  0.15540000   0.00001819
  0.15540000   0.00001263
  0.15540000   0.00000882
  0.15540000   0.00000621
  0.15540000   0.00000442
  0.15540000   0.00000318
  0.15540000   0.00000233
  0.15540000   0.00000174
  0.15540000   0.00000133
  0.15540000   0.00000104
  0.15540000   0.00000084
  0.15540000   0.00000070
  0.15540000   0.00000059
  0.15540000   0.00000052
  0.15540000   0.00000046
  0.15540000   0.00000042
  0.15540000   0.00000039
  0.15540000   0.00000036
  0.15540000   0.00000034
  0.15560000   0.00008215
  0.15560000   0.00005644
  0.15560000   0.00003883
  0.15560000   0.00002678
  0.15560000   0.00001853
  0.15560000   0.00001287
  0.15560000   0.00000899
  0.15560000   0.00000633
  0.15560000   0.00000450
  0.15560000   0.00000324
  0.15560000   0.00000237
  0.15560000   0.00000177
  0.15560000   0.00000135
  0.15560000   0.00000106
  0.15560000   0.00000085
  0.15560000   0.00000070
  0.15560000   0.00000060
  0.15560000   0.00000052
  0.15560000   0.00000046
  0.15560000   0.00000042
  0.15560000   0.00000039
  0.15560000   0.00000036
  0.15560000   0.00000034
  0.15580000   0.00008352
  0.15580000   0.00005741
  0.15580000   0.00003953
  0.15580000   0.00002728
  0.15580000   0.00001888
  0.15580000   0.00001312
  0.15580000   0.00000917
  0.15580000   0.00000645
  0.15580000   0.00000459
  0.15580000   0.00000330
  0.15580000   0.00000241
  0.15580000   0.00000180
  0.15580000   0.00000137
  0.15580000   0.00000107
  0.15580000   0.00000086
  0.15580000   0.00000071
  0.15580000   0.00000060
  0.15580000   0.00000052
  0.15580000   0.00000047
  0.15580000   0.00000042
  0.15580000   0.00000039
  0.15580000   0.00000036
  0.15580000   0.00000034
  0.15600000   0.00008491
  0.15600000   0.00005840
  0.15600000   0.00004023
  0.15600000   0.00002778
  0.15600000   0.00001923
  0.15600000   0.00001337
  0.15600000   0.00000935
  0.15600000   0.00000658
  0.15600000   0.00000468
  0.15600000   0.00000336
  0.15600000   0.00000246
  0.15600000   0.00000183
  0.15600000   0.00000139
  0.15600000   0.00000109
  0.15600000   0.00000087
  0.15600000   0.00000072
  0.15600000   0.00000061
  0.15600000   0.00000053
  0.15600000   0.00000047
  0.15600000   0.00000042
  0.15600000   0.00000039
  0.15600000   0.00000036
  0.15600000   0.00000034
  0.15620000   0.00008633
  0.15620000   0.00005941
  0.15620000   0.00004095
  0.15620000   0.00002829
  0.15620000   0.00001960
  0.15620000   0.00001363
  0.15620000   0.00000953
  0.15620000   0.00000671
  0.15620000   0.00000477
  0.15620000   0.00000343
  0.15620000   0.00000250
  0.15620000   0.00000186
  0.15620000   0.00000141
  0.15620000   0.00000110
  0.15620000   0.00000088
  0.15620000   0.00000073
  0.15620000   0.00000061
  0.15620000   0.00000053
  0.15620000   0.00000047
  0.15620000   0.00000043
  0.15620000   0.00000039
  0.15620000   0.00000036
  0.15620000   0.00000034
  0.15640000   0.00008777
  0.15640000   0.00006044
  0.15640000   0.00004169
  0.15640000   0.00002881
  0.15640000   0.00001997
  0.15640000   0.00001389
  0.15640000   0.00000971
  0.15640000   0.00000684
  0.15640000   0.00000486
  0.15640000   0.00000349
  0.15640000   0.00000255
  0.15640000   0.00000189
  0.15640000   0.00000144
  0.15640000   0.00000112
  0.15640000   0.00000089
  0.15640000   0.00000073
  0.15640000   0.00000062
  0.15640000   0.00000054
  0.15640000   0.00000047
  0.15640000   0.00000043
  0.15640000   0.00000039
  0.15640000   0.00000036
  0.15640000   0.00000034
  0.15660000   0.00008923
  0.15660000   0.00006149
  0.15660000   0.00004243
  0.15660000   0.00002934
  0.15660000   0.00002034
  0.15660000   0.00001416
  0.15660000   0.00000990
  0.15660000   0.00000697
  0.15660000   0.00000496
  0.15660000   0.00000356
  0.15660000   0.00000260
  0.15660000   0.00000193
  0.15660000   0.00000146
  0.15660000   0.00000113
  0.15660000   0.00000090
  0.15660000   0.00000074
  0.15660000   0.00000062
  0.15660000   0.00000054
  0.15660000   0.00000048
  0.15660000   0.00000043
  0.15660000   0.00000039
  0.15660000   0.00000036
  0.15660000   0.00000034
  0.15680000   0.00009072
  0.15680000   0.00006255
  0.15680000   0.00004319
  0.15680000   0.00002988
  0.15680000   0.00002073
  0.15680000   0.00001443
  0.15680000   0.00001010
  0.15680000   0.00000711
  0.15680000   0.00000505
  0.15680000   0.00000363
  0.15680000   0.00000264
  0.15680000   0.00000196
  0.15680000   0.00000148
  0.15680000   0.00000115
  0.15680000   0.00000092
  0.15680000   0.00000075
  0.15680000   0.00000063
  0.15680000   0.00000054
  0.15680000   0.00000048
  0.15680000   0.00000043
  0.15680000   0.00000039
  0.15680000   0.00000036
  0.15680000   0.00000034
  0.15700000   0.00009224
  0.15700000   0.00006363
  0.15700000   0.00004396
  0.15700000   0.00003043
  0.15700000   0.00002112
  0.15700000   0.00001471
  0.15700000   0.00001030
  0.15700000   0.00000725
  0.15700000   0.00000515
  0.15700000   0.00000370
  0.15700000   0.00000269
  0.15700000   0.00000200
  0.15700000   0.00000151
  0.15700000   0.00000117
  0.15700000   0.00000093
  0.15700000   0.00000076
  0.15700000   0.00000064
  0.15700000   0.00000055
  0.15700000   0.00000048
  0.15700000   0.00000043
  0.15700000   0.00000039
  0.15700000   0.00000036
  0.15700000   0.00000034
  0.15720000   0.00009378
  0.15720000   0.00006474
  0.15720000   0.00004475
  0.15720000   0.00003099
  0.15720000   0.00002152
  0.15720000   0.00001500
  0.15720000   0.00001050
  0.15720000   0.00000740
  0.15720000   0.00000525
  0.15720000   0.00000377
  0.15720000   0.00000275
  0.15720000   0.00000203
  0.15720000   0.00000153
  0.15720000   0.00000119
  0.15720000   0.00000094
  0.15720000   0.00000077
  0.15720000   0.00000064
  0.15720000   0.00000055
  0.15720000   0.00000048
  0.15720000   0.00000043
  0.15720000   0.00000040
  0.15720000   0.00000037
  0.15720000   0.00000034
  0.15740000   0.00009534
  0.15740000   0.00006586
  0.15740000   0.00004555
  0.15740000   0.00003157
  0.15740000   0.00002193
  0.15740000   0.00001529
  0.15740000   0.00001071
  0.15740000   0.00000754
  0.15740000   0.00000536
  0.15740000   0.00000385
  0.15740000   0.00000280
  0.15740000   0.00000207
  0.15740000   0.00000156
  0.15740000   0.00000120
  0.15740000   0.00000095
  0.15740000   0.00000078
  0.15740000   0.00000065
  0.15740000   0.00000056
  0.15740000   0.00000049
  0.15740000   0.00000044
  0.15740000   0.00000040
  0.15740000   0.00000037
  0.15740000   0.00000034
  0.15760000   0.00009693
  0.15760000   0.00006700
  0.15760000   0.00004637
  0.15760000   0.00003215
  0.15760000   0.00002235
  0.15760000   0.00001558
  0.15760000   0.00001092
  0.15760000   0.00000769
  0.15760000   0.00000546
  0.15760000   0.00000392
  0.15760000   0.00000285
  0.15760000   0.00000211
  0.15760000   0.00000159
  0.15760000   0.00000122
  0.15760000   0.00000097
  0.15760000   0.00000079
  0.15760000   0.00000065
  0.15760000   0.00000056
  0.15760000   0.00000049
  0.15760000   0.00000044
  0.15760000   0.00000040
  0.15760000   0.00000037
  0.15760000   0.00000034
  0.15780000   0.00009855
  0.15780000   0.00006816
  0.15780000   0.00004720
  0.15780000   0.00003275
  0.15780000   0.00002277
  0.15780000   0.00001589
  0.15780000   0.00001113
  0.15780000   0.00000785
  0.15780000   0.00000557
  0.15780000   0.00000400
  0.15780000   0.00000291
  0.15780000   0.00000214
  0.15780000   0.00000161
  0.15780000   0.00000124
  0.15780000   0.00000098
  0.15780000   0.00000079
  0.15780000   0.00000066
  0.15780000   0.00000056
  0.15780000   0.00000049
  0.15780000   0.00000044
  0.15780000   0.00000040
  0.15780000   0.00000037
  0.15780000   0.00000034
  0.15800000   0.00010020
  0.15800000   0.00006934
  0.15800000   0.00004805
  0.15800000   0.00003335
  0.15800000   0.00002320
  0.15800000   0.00001620
  0.15800000   0.00001135
  0.15800000   0.00000800
  0.15800000   0.00000568
  0.15800000   0.00000408
  0.15800000   0.00000296
  0.15800000   0.00000218
  0.15800000   0.00000164
  0.15800000   0.00000126
  0.15800000   0.00000099
  0.15800000   0.00000080
  0.15800000   0.00000067
  0.15800000   0.00000057
  0.15800000   0.00000050
  0.15800000   0.00000044
  0.15800000   0.00000040
  0.15800000   0.00000037
  0.15800000   0.00000034
  0.15820000   0.00010188
  0.15820000   0.00007055
  0.15820000   0.00004891
  0.15820000   0.00003397
  0.15820000   0.00002365
  0.15820000   0.00001651
  0.15820000   0.00001158
  0.15820000   0.00000816
  0.15820000   0.00000580
  0.15820000   0.00000416
  0.15820000   0.00000302
  0.15820000   0.00000223
  0.15820000   0.00000167
  0.15820000   0.00000128
  0.15820000   0.00000101
  0.15820000   0.00000081
  0.15820000   0.00000068
  0.15820000   0.00000057
  0.15820000   0.00000050
  0.15820000   0.00000045
  0.15820000   0.00000040
  0.15820000   0.00000037
  0.15820000   0.00000034
  0.15840000   0.00010358
  0.15840000   0.00007177
  0.15840000   0.00004979
  0.15840000   0.00003460
  0.15840000   0.00002410
  0.15840000   0.00001683
  0.15840000   0.00001181
  0.15840000   0.00000833
  0.15840000   0.00000591
  0.15840000   0.00000424
  0.15840000   0.00000308
  0.15840000   0.00000227
  0.15840000   0.00000170
  0.15840000   0.00000130
  0.15840000   0.00000102
  0.15840000   0.00000082
  0.15840000   0.00000068
  0.15840000   0.00000058
  0.15840000   0.00000050
  0.15840000   0.00000045
  0.15840000   0.00000041
  0.15840000   0.00000037
  0.15840000   0.00000035
  0.15860000   0.00010531
  0.15860000   0.00007301
  0.15860000   0.00005068
  0.15860000   0.00003524
  0.15860000   0.00002455
  0.15860000   0.00001716
  0.15860000   0.00001204
  0.15860000   0.00000849
  0.15860000   0.00000603
  0.15860000   0.00000433
  0.15860000   0.00000314
  0.15860000   0.00000231
  0.15860000   0.00000173
  0.15860000   0.00000132
  0.15860000   0.00000104
  0.15860000   0.00000084
  0.15860000   0.00000069
  0.15860000   0.00000058
  0.15860000   0.00000051
  0.15860000   0.00000045
  0.15860000   0.00000041
  0.15860000   0.00000037
  0.15860000   0.00000035
  0.15880000   0.00010707
  0.15880000   0.00007428
  0.15880000   0.00005159
  0.15880000   0.00003589
  0.15880000   0.00002502
  0.15880000   0.00001750
  0.15880000   0.00001228
  0.15880000   0.00000866
  0.15880000   0.00000616
  0.15880000   0.00000441
  0.15880000   0.00000320
  0.15880000   0.00000235
  0.15880000   0.00000176
  0.15880000   0.00000135
  0.15880000   0.00000105
  0.15880000   0.00000085
  0.15880000   0.00000070
  0.15880000   0.00000059
  0.15880000   0.00000051
  0.15880000   0.00000045
  0.15880000   0.00000041
  0.15880000   0.00000037
  0.15880000   0.00000035
  0.15900000   0.00010886
  0.15900000   0.00007557
  0.15900000   0.00005252
  0.15900000   0.00003656
  0.15900000   0.00002550
  0.15900000   0.00001784
  0.15900000   0.00001252
  0.15900000   0.00000884
  0.15900000   0.00000628
  0.15900000   0.00000450
  0.15900000   0.00000326
  0.15900000   0.00000240
  0.15900000   0.00000179
  0.15900000   0.00000137
  0.15900000   0.00000107
  0.15900000   0.00000086
  0.15900000   0.00000071
  0.15900000   0.00000060
  0.15900000   0.00000052
  0.15900000   0.00000046
  0.15900000   0.00000041
  0.15900000   0.00000038
  0.15900000   0.00000035
  0.15920000   0.00011069
  0.15920000   0.00007689
  0.15920000   0.00005347
  0.15920000   0.00003724
  0.15920000   0.00002599
  0.15920000   0.00001819
  0.15920000   0.00001277
  0.15920000   0.00000902
  0.15920000   0.00000641
  0.15920000   0.00000459
  0.15920000   0.00000333
  0.15920000   0.00000244
  0.15920000   0.00000183
  0.15920000   0.00000139
  0.15920000   0.00000109
  0.15920000   0.00000087
  0.15920000   0.00000071
  0.15920000   0.00000060
  0.15920000   0.00000052
  0.15920000   0.00000046
  0.15920000   0.00000041
  0.15920000   0.00000038
  0.15920000   0.00000035
  0.15940000   0.00011254
  0.15940000   0.00007822
  0.15940000   0.00005443
  0.15940000   0.00003793
  0.15940000   0.00002648
  0.15940000   0.00001854
  0.15940000   0.00001303
  0.15940000   0.00000920
  0.15940000   0.00000654
  0.15940000   0.00000468
  0.15940000   0.00000339
  0.15940000   0.00000249
  0.15940000   0.00000186
  0.15940000   0.00000142
  0.15940000   0.00000110
  0.15940000   0.00000088
  0.15940000   0.00000072
  0.15940000   0.00000061
  0.15940000   0.00000052
  0.15940000   0.00000046
  0.15940000   0.00000041
  0.15940000   0.00000038
  0.15940000   0.00000035
  0.15960000   0.00011442
  0.15960000   0.00007958
  0.15960000   0.00005541
  0.15960000   0.00003863
  0.15960000   0.00002699
  0.15960000   0.00001891
  0.15960000   0.00001329
  0.15960000   0.00000939
  0.15960000   0.00000667
  0.15960000   0.00000478
  0.15960000   0.00000346
  0.15960000   0.00000254
  0.15960000   0.00000189
  0.15960000   0.00000144
  0.15960000   0.00000112
  0.15960000   0.00000089
  0.15960000   0.00000073
  0.15960000   0.00000061
  0.15960000   0.00000053
  0.15960000   0.00000046
  0.15960000   0.00000042
  0.15960000   0.00000038
  0.15960000   0.00000035
  0.15980000   0.00011634
  0.15980000   0.00008096
  0.15980000   0.00005640
  0.15980000   0.00003935
  0.15980000   0.00002751
  0.15980000   0.00001928
  0.15980000   0.00001356
  0.15980000   0.00000958
  0.15980000   0.00000681
  0.15980000   0.00000488
  0.15980000   0.00000353
  0.15980000   0.00000259
  0.15980000   0.00000193
  0.15980000   0.00000147
  0.15980000   0.00000114
  0.15980000   0.00000091
  0.15980000   0.00000074
  0.15980000   0.00000062
  0.15980000   0.00000053
  0.15980000   0.00000047
  0.15980000   0.00000042
  0.15980000   0.00000038
  0.15980000   0.00000035
  0.16000000   0.00011828
  0.16000000   0.00008237
  0.16000000   0.00005742
  0.16000000   0.00004008
  0.16000000   0.00002803
  0.16000000   0.00001965
  0.16000000   0.00001383
  0.16000000   0.00000977
  0.16000000   0.00000695
  0.16000000   0.00000498
  0.16000000   0.00000360
  0.16000000   0.00000264
  0.16000000   0.00000197
  0.16000000   0.00000149
  0.16000000   0.00000116
  0.16000000   0.00000092
  0.16000000   0.00000075
  0.16000000   0.00000063
  0.16000000   0.00000054
  0.16000000   0.00000047
  0.16000000   0.00000042
  0.16000000   0.00000038
  0.16000000   0.00000035
  0.16020000   0.00012027
  0.16020000   0.00008380
  0.16020000   0.00005845
  0.16020000   0.00004083
  0.16020000   0.00002857
  0.16020000   0.00002004
  0.16020000   0.00001410
  0.16020000   0.00000997
  0.16020000   0.00000709
  0.16020000   0.00000508
  0.16020000   0.00000367
  0.16020000   0.00000269
  0.16020000   0.00000200
  0.16020000   0.00000152
  0.16020000   0.00000118
  0.16020000   0.00000093
  0.16020000   0.00000076
  0.16020000   0.00000063
  0.16020000   0.00000054
  0.16020000   0.00000047
  0.16020000   0.00000042
  0.16020000   0.00000038
  0.16020000   0.00000035
  0.16040000   0.00012228
  0.16040000   0.00008526
  0.16040000   0.00005951
  0.16040000   0.00004159
  0.16040000   0.00002912
  0.16040000   0.00002043
  0.16040000   0.00001439
  0.16040000   0.00001017
  0.16040000   0.00000723
  0.16040000   0.00000518
  0.16040000   0.00000375
  0.16040000   0.00000274
  0.16040000   0.00000204
  0.16040000   0.00000154
  0.16040000   0.00000119
  0.16040000   0.00000095
  0.16040000   0.00000077
  0.16040000   0.00000064
  0.16040000   0.00000055
  0.16040000   0.00000048
  0.16040000   0.00000043
  0.16040000   0.00000039
  0.16040000   0.00000035
  0.16060000   0.00012433
  0.16060000   0.00008675
  0.16060000   0.00006058
  0.16060000   0.00004236
  0.16060000   0.00002967
  0.16060000   0.00002084
  0.16060000   0.00001468
  0.16060000   0.00001038
  0.16060000   0.00000738
  0.16060000   0.00000529
  0.16060000   0.00000382
  0.16060000   0.00000280
  0.16060000   0.00000208
  0.16060000   0.00000157
  0.16060000   0.00000121
  0.16060000   0.00000096
  0.16060000   0.00000078
  0.16060000   0.00000065
  0.16060000   0.00000055
  0.16060000   0.00000048
  0.16060000   0.00000043
  0.16060000   0.00000039
  0.16060000   0.00000036
  0.16080000   0.00012641
  0.16080000   0.00008825
  0.16080000   0.00006167
  0.16080000   0.00004315
  0.16080000   0.00003024
  0.16080000   0.00002125
  0.16080000   0.00001497
  0.16080000   0.00001059
  0.16080000   0.00000753
  0.16080000   0.00000540
  0.16080000   0.00000390
  0.16080000   0.00000286
  0.16080000   0.00000212
  0.16080000   0.00000160
  0.16080000   0.00000123
  0.16080000   0.00000097
  0.16080000   0.00000079
  0.16080000   0.00000065
  0.16080000   0.00000056
  0.16080000   0.00000048
  0.16080000   0.00000043
  0.16080000   0.00000039
  0.16080000   0.00000036
  0.16100000   0.00012853
  0.16100000   0.00008979
  0.16100000   0.00006279
  0.16100000   0.00004396
  0.16100000   0.00003082
  0.16100000   0.00002166
  0.16100000   0.00001527
  0.16100000   0.00001081
  0.16100000   0.00000769
  0.16100000   0.00000551
  0.16100000   0.00000398
  0.16100000   0.00000291
  0.16100000   0.00000216
  0.16100000   0.00000163
  0.16100000   0.00000126
  0.16100000   0.00000099
  0.16100000   0.00000080
  0.16100000   0.00000066
  0.16100000   0.00000056
  0.16100000   0.00000049
  0.16100000   0.00000043
  0.16100000   0.00000039
  0.16100000   0.00000036
  0.16120000   0.00013069
  0.16120000   0.00009135
  0.16120000   0.00006392
  0.16120000   0.00004478
  0.16120000   0.00003142
  0.16120000   0.00002209
  0.16120000   0.00001558
  0.16120000   0.00001103
  0.16120000   0.00000785
  0.16120000   0.00000562
  0.16120000   0.00000407
  0.16120000   0.00000297
  0.16120000   0.00000220
  0.16120000   0.00000166
  0.16120000   0.00000128
  0.16120000   0.00000100
  0.16120000   0.00000081
  0.16120000   0.00000067
  0.16120000   0.00000057
  0.16120000   0.00000049
  0.16120000   0.00000044
  0.16120000   0.00000039
  0.16120000   0.00000036
  0.16140000   0.00013288
  0.16140000   0.00009295
  0.16140000   0.00006507
  0.16140000   0.00004561
  0.16140000   0.00003202
  0.16140000   0.00002253
  0.16140000   0.00001589
  0.16140000   0.00001126
  0.16140000   0.00000801
  0.16140000   0.00000574
  0.16140000   0.00000415
  0.16140000   0.00000303
  0.16140000   0.00000225
  0.16140000   0.00000169
  0.16140000   0.00000130
  0.16140000   0.00000102
  0.16140000   0.00000082
  0.16140000   0.00000068
  0.16140000   0.00000057
  0.16140000   0.00000050
  0.16140000   0.00000044
  0.16140000   0.00000039
  0.16140000   0.00000036
  0.16160000   0.00013510
  0.16160000   0.00009456
  0.16160000   0.00006625
  0.16160000   0.00004646
  0.16160000   0.00003264
  0.16160000   0.00002297
  0.16160000   0.00001622
  0.16160000   0.00001149
  0.16160000   0.00000818
  0.16160000   0.00000586
  0.16160000   0.00000424
  0.16160000   0.00000309
  0.16160000   0.00000229
  0.16160000   0.00000172
  0.16160000   0.00000132
  0.16160000   0.00000104
  0.16160000   0.00000083
  0.16160000   0.00000068
  0.16160000   0.00000058
  0.16160000   0.00000050
  0.16160000   0.00000044
  0.16160000   0.00000040
  0.16160000   0.00000036
  0.16180000   0.00013737
  0.16180000   0.00009621
  0.16180000   0.00006744
  0.16180000   0.00004733
  0.16180000   0.00003326
  0.16180000   0.00002343
  0.16180000   0.00001654
  0.16180000   0.00001172
  0.16180000   0.00000835
  0.16180000   0.00000598
  0.16180000   0.00000432
  0.16180000   0.00000316
  0.16180000   0.00000233
  0.16180000   0.00000176
  0.16180000   0.00000134
  0.16180000   0.00000105
  0.16180000   0.00000084
  0.16180000   0.00000069
  0.16180000   0.00000058
  0.16180000   0.00000050
  0.16180000   0.00000044
  0.16180000   0.00000040
  0.16180000   0.00000036
  0.16200000   0.00013967
  0.16200000   0.00009789
  0.16200000   0.00006866
  0.16200000   0.00004821
  0.16200000   0.00003390
  0.16200000   0.00002389
  0.16200000   0.00001688
  0.16200000   0.00001197
  0.16200000   0.00000852
  0.16200000   0.00000611
  0.16200000   0.00000441
  0.16200000   0.00000322
  0.16200000   0.00000238
  0.16200000   0.00000179
  0.16200000   0.00000137
  0.16200000   0.00000107
  0.16200000   0.00000086
  0.16200000   0.00000070
  0.16200000   0.00000059
  0.16200000   0.00000051
  0.16200000   0.00000045
  0.16200000   0.00000040
  0.16200000   0.00000036
  0.16220000   0.00014202
  0.16220000   0.00009960
  0.16220000   0.00006990
  0.16220000   0.00004911
  0.16220000   0.00003456
  0.16220000   0.00002436
  0.16220000   0.00001722
  0.16220000   0.00001221
  0.16220000   0.00000870
  0.16220000   0.00000624
  0.16220000   0.00000451
  0.16220000   0.00000329
  0.16220000   0.00000243
  0.16220000   0.00000182
  0.16220000   0.00000139
  0.16220000   0.00000109
  0.16220000   0.00000087
  0.16220000   0.00000071
  0.16220000   0.00000060
  0.16220000   0.00000051
  0.16220000   0.00000045
  0.16220000   0.00000040
  0.16220000   0.00000037
  0.16240000   0.00014440
  0.16240000   0.00010133
  0.16240000   0.00007116
  0.16240000   0.00005003
  0.16240000   0.00003522
  0.16240000   0.00002484
  0.16240000   0.00001757
  0.16240000   0.00001247
  0.16240000   0.00000888
  0.16240000   0.00000637
  0.16240000   0.00000460
  0.16240000   0.00000336
  0.16240000   0.00000248
  0.16240000   0.00000186
  0.16240000   0.00000142
  0.16240000   0.00000110
  0.16240000   0.00000088
  0.16240000   0.00000072
  0.16240000   0.00000060
  0.16240000   0.00000052
  0.16240000   0.00000045
  0.16240000   0.00000040
  0.16240000   0.00000037
  0.16260000   0.00014682
  0.16260000   0.00010310
  0.16260000   0.00007245
  0.16260000   0.00005097
  0.16260000   0.00003590
  0.16260000   0.00002534
  0.16260000   0.00001792
  0.16260000   0.00001272
  0.16260000   0.00000907
  0.16260000   0.00000650
  0.16260000   0.00000470
  0.16260000   0.00000343
  0.16260000   0.00000253
  0.16260000   0.00000189
  0.16260000   0.00000144
  0.16260000   0.00000112
  0.16260000   0.00000089
  0.16260000   0.00000073
  0.16260000   0.00000061
  0.16260000   0.00000052
  0.16260000   0.00000046
  0.16260000   0.00000041
  0.16260000   0.00000037
  0.16280000   0.00014929
  0.16280000   0.00010490
  0.16280000   0.00007376
  0.16280000   0.00005192
  0.16280000   0.00003659
  0.16280000   0.00002584
  0.16280000   0.00001829
  0.16280000   0.00001299
  0.16280000   0.00000926
  0.16280000   0.00000664
  0.16280000   0.00000480
  0.16280000   0.00000350
  0.16280000   0.00000258
  0.16280000   0.00000193
  0.16280000   0.00000147
  0.16280000   0.00000114
  0.16280000   0.00000091
  0.16280000   0.00000074
  0.16280000   0.00000062
  0.16280000   0.00000053
  0.16280000   0.00000046
  0.16280000   0.00000041
  0.16280000   0.00000037
  0.16300000   0.00015179
  0.16300000   0.00010673
  0.16300000   0.00007509
  0.16300000   0.00005289
  0.16300000   0.00003730
  0.16300000   0.00002635
  0.16300000   0.00001866
  0.16300000   0.00001326
  0.16300000   0.00000946
  0.16300000   0.00000678
  0.16300000   0.00000490
  0.16300000   0.00000357
  0.16300000   0.00000263
  0.16300000   0.00000197
  0.16300000   0.00000150
  0.16300000   0.00000116
  0.16300000   0.00000092
  0.16300000   0.00000075
  0.16300000   0.00000062
  0.16300000   0.00000053
  0.16300000   0.00000046
  0.16300000   0.00000041
  0.16300000   0.00000037
  0.16320000   0.00015434
  0.16320000   0.00010859
  0.16320000   0.00007645
  0.16320000   0.00005388
  0.16320000   0.00003802
  0.16320000   0.00002687
  0.16320000   0.00001904
  0.16320000   0.00001353
  0.16320000   0.00000965
  0.16320000   0.00000693
  0.16320000   0.00000500
  0.16320000   0.00000365
  0.16320000   0.00000269
  0.16320000   0.00000201
  0.16320000   0.00000153
  0.16320000   0.00000118
  0.16320000   0.00000094
  0.16320000   0.00000076
  0.16320000   0.00000063
  0.16320000   0.00000054
  0.16320000   0.00000047
  0.16320000   0.00000041
  0.16320000   0.00000037
  0.16340000   0.00015693
  0.16340000   0.00011048
  0.16340000   0.00007784
  0.16340000   0.00005489
  0.16340000   0.00003875
  0.16340000   0.00002741
  0.16340000   0.00001943
  0.16340000   0.00001381
  0.16340000   0.00000986
  0.16340000   0.00000707
  0.16340000   0.00000511
  0.16340000   0.00000372
  0.16340000   0.00000274
  0.16340000   0.00000205
  0.16340000   0.00000155
  0.16340000   0.00000120
  0.16340000   0.00000095
  0.16340000   0.00000077
  0.16340000   0.00000064
  0.16340000   0.00000054
  0.16340000   0.00000047
  0.16340000   0.00000042
  0.16340000   0.00000038
  0.16360000   0.00015957
  0.16360000   0.00011241
  0.16360000   0.00007925
  0.16360000   0.00005592
  0.16360000   0.00003950
  0.16360000   0.00002795
  0.16360000   0.00001982
  0.16360000   0.00001410
  0.16360000   0.00001007
  0.16360000   0.00000722
  0.16360000   0.00000522
  0.16360000   0.00000380
  0.16360000   0.00000280
  0.16360000   0.00000209
  0.16360000   0.00000158
  0.16360000   0.00000122
  0.16360000   0.00000097
  0.16360000   0.00000078
  0.16360000   0.00000065
  0.16360000   0.00000055
  0.16360000   0.00000047
  0.16360000   0.00000042
  0.16360000   0.00000038
  0.16380000   0.00016225
  0.16380000   0.00011437
  0.16380000   0.00008068
  0.16380000   0.00005696
  0.16380000   0.00004027
  0.16380000   0.00002851
  0.16380000   0.00002023
  0.16380000   0.00001439
  0.16380000   0.00001028
  0.16380000   0.00000738
  0.16380000   0.00000533
  0.16380000   0.00000388
  0.16380000   0.00000286
  0.16380000   0.00000213
  0.16380000   0.00000161
  0.16380000   0.00000125
  0.16380000   0.00000098
  0.16380000   0.00000079
  0.16380000   0.00000065
  0.16380000   0.00000055
  0.16380000   0.00000048
  0.16380000   0.00000042
  0.16380000   0.00000038
  0.16400000   0.00016497
  0.16400000   0.00011637
  0.16400000   0.00008214
  0.16400000   0.00005803
  0.16400000   0.00004104
  0.16400000   0.00002908
  0.16400000   0.00002064
  0.16400000   0.00001469
  0.16400000   0.00001050
  0.16400000   0.00000754
  0.16400000   0.00000544
  0.16400000   0.00000396
  0.16400000   0.00000292
  0.16400000   0.00000217
  0.16400000   0.00000165
  0.16400000   0.00000127
  0.16400000   0.00000100
  0.16400000   0.00000080
  0.16400000   0.00000066
  0.16400000   0.00000056
  0.16400000   0.00000048
  0.16400000   0.00000043
  0.16400000   0.00000038
  0.16420000   0.00016775
  0.16420000   0.00011840
  0.16420000   0.00008363
  0.16420000   0.00005912
  0.16420000   0.00004184
  0.16420000   0.00002965
  0.16420000   0.00002106
  0.16420000   0.00001500
  0.16420000   0.00001072
  0.16420000   0.00000770
  0.16420000   0.00000556
  0.16420000   0.00000405
  0.16420000   0.00000298
  0.16420000   0.00000222
  0.16420000   0.00000168
  0.16420000   0.00000129
  0.16420000   0.00000101
  0.16420000   0.00000082
  0.16420000   0.00000067
  0.16420000   0.00000057
  0.16420000   0.00000049
  0.16420000   0.00000043
  0.16420000   0.00000038
  0.16440000   0.00017056
  0.16440000   0.00012047
  0.16440000   0.00008514
  0.16440000   0.00006023
  0.16440000   0.00004265
  0.16440000   0.00003025
  0.16440000   0.00002149
  0.16440000   0.00001531
  0.16440000   0.00001095
  0.16440000   0.00000786
  0.16440000   0.00000568
  0.16440000   0.00000414
  0.16440000   0.00000304
  0.16440000   0.00000226
  0.16440000   0.00000171
  0.16440000   0.00000131
  0.16440000   0.00000103
  0.16440000   0.00000083
  0.16440000   0.00000068
  0.16440000   0.00000057
  0.16440000   0.00000049
  0.16440000   0.00000043
  0.16440000   0.00000039
  0.16460000   0.00017343
  0.16460000   0.00012258
  0.16460000   0.00008669
  0.16460000   0.00006136
  0.16460000   0.00004347
  0.16460000   0.00003085
  0.16460000   0.00002193
  0.16460000   0.00001563
  0.16460000   0.00001118
  0.16460000   0.00000803
  0.16460000   0.00000580
  0.16460000   0.00000423
  0.16460000   0.00000311
  0.16460000   0.00000231
  0.16460000   0.00000174
  0.16460000   0.00000134
  0.16460000   0.00000105
  0.16460000   0.00000084
  0.16460000   0.00000069
  0.16460000   0.00000058
  0.16460000   0.00000050
  0.16460000   0.00000044
  0.16460000   0.00000039
  0.16480000   0.00017635
  0.16480000   0.00012472
  0.16480000   0.00008826
  0.16480000   0.00006251
  0.16480000   0.00004432
  0.16480000   0.00003146
  0.16480000   0.00002238
  0.16480000   0.00001596
  0.16480000   0.00001142
  0.16480000   0.00000821
  0.16480000   0.00000593
  0.16480000   0.00000432
  0.16480000   0.00000317
  0.16480000   0.00000236
  0.16480000   0.00000178
  0.16480000   0.00000136
  0.16480000   0.00000107
  0.16480000   0.00000085
  0.16480000   0.00000070
  0.16480000   0.00000058
  0.16480000   0.00000050
  0.16480000   0.00000044
  0.16480000   0.00000039
  0.16500000   0.00017931
  0.16500000   0.00012690
  0.16500000   0.00008986
  0.16500000   0.00006368
  0.16500000   0.00004517
  0.16500000   0.00003209
  0.16500000   0.00002284
  0.16500000   0.00001629
  0.16500000   0.00001166
  0.16500000   0.00000838
  0.16500000   0.00000606
  0.16500000   0.00000441
  0.16500000   0.00000324
  0.16500000   0.00000241
  0.16500000   0.00000181
  0.16500000   0.00000139
  0.16500000   0.00000109
  0.16500000   0.00000087
  0.16500000   0.00000071
  0.16500000   0.00000059
  0.16500000   0.00000051
  0.16500000   0.00000044
  0.16500000   0.00000039
  0.16520000   0.00018232
  0.16520000   0.00012912
  0.16520000   0.00009149
  0.16520000   0.00006488
  0.16520000   0.00004605
  0.16520000   0.00003273
  0.16520000   0.00002331
  0.16520000   0.00001664
  0.16520000   0.00001191
  0.16520000   0.00000856
  0.16520000   0.00000619
  0.16520000   0.00000451
  0.16520000   0.00000331
  0.16520000   0.00000246
  0.16520000   0.00000185
  0.16520000   0.00000142
  0.16520000   0.00000110
  0.16520000   0.00000088
  0.16520000   0.00000072
  0.16520000   0.00000060
  0.16520000   0.00000051
  0.16520000   0.00000045
  0.16520000   0.00000040
  0.16540000   0.00018539
  0.16540000   0.00013137
  0.16540000   0.00009315
  0.16540000   0.00006609
  0.16540000   0.00004694
  0.16540000   0.00003339
  0.16540000   0.00002378
  0.16540000   0.00001698
  0.16540000   0.00001217
  0.16540000   0.00000875
  0.16540000   0.00000633
  0.16540000   0.00000460
  0.16540000   0.00000338
  0.16540000   0.00000251
  0.16540000   0.00000189
  0.16540000   0.00000144
  0.16540000   0.00000112
  0.16540000   0.00000089
  0.16540000   0.00000073
  0.16540000   0.00000061
  0.16540000   0.00000052
  0.16540000   0.00000045
  0.16540000   0.00000040
  0.16560000   0.00018851
  0.16560000   0.00013367
  0.16560000   0.00009484
  0.16560000   0.00006733
  0.16560000   0.00004785
  0.16560000   0.00003405
  0.16560000   0.00002427
  0.16560000   0.00001734
  0.16560000   0.00001243
  0.16560000   0.00000894
  0.16560000   0.00000646
  0.16560000   0.00000471
  0.16560000   0.00000345
  0.16560000   0.00000256
  0.16560000   0.00000193
  0.16560000   0.00000147
  0.16560000   0.00000114
  0.16560000   0.00000091
  0.16560000   0.00000074
  0.16560000   0.00000061
  0.16560000   0.00000052
  0.16560000   0.00000045
  0.16560000   0.00000040
  0.16580000   0.00019168
  0.16580000   0.00013601
  0.16580000   0.00009656
  0.16580000   0.00006860
  0.16580000   0.00004878
  0.16580000   0.00003473
  0.16580000   0.00002477
  0.16580000   0.00001771
  0.16580000   0.00001269
  0.16580000   0.00000913
  0.16580000   0.00000661
  0.16580000   0.00000481
  0.16580000   0.00000353
  0.16580000   0.00000262
  0.16580000   0.00000197
  0.16580000   0.00000150
  0.16580000   0.00000117
  0.16580000   0.00000092
  0.16580000   0.00000075
  0.16580000   0.00000062
  0.16580000   0.00000053
  0.16580000   0.00000046
  0.16580000   0.00000041
  0.16600000   0.00019490
  0.16600000   0.00013839
  0.16600000   0.00009831
  0.16600000   0.00006989
  0.16600000   0.00004973
  0.16600000   0.00003543
  0.16600000   0.00002528
  0.16600000   0.00001808
  0.16600000   0.00001296
  0.16600000   0.00000933
  0.16600000   0.00000675
  0.16600000   0.00000491
  0.16600000   0.00000361
  0.16600000   0.00000267
  0.16600000   0.00000201
  0.16600000   0.00000153
  0.16600000   0.00000119
  0.16600000   0.00000094
  0.16600000   0.00000076
  0.16600000   0.00000063
  0.16600000   0.00000053
  0.16600000   0.00000046
  0.16600000   0.00000041
  0.16620000   0.00019818
  0.16620000   0.00014081
  0.16620000   0.00010009
  0.16620000   0.00007120
  0.16620000   0.00005069
  0.16620000   0.00003614
  0.16620000   0.00002580
  0.16620000   0.00001846
  0.16620000   0.00001324
  0.16620000   0.00000954
  0.16620000   0.00000690
  0.16620000   0.00000502
  0.16620000   0.00000369
  0.16620000   0.00000273
  0.16620000   0.00000205
  0.16620000   0.00000156
  0.16620000   0.00000121
  0.16620000   0.00000096
  0.16620000   0.00000077
  0.16620000   0.00000064
  0.16620000   0.00000054
  0.16620000   0.00000047
  0.16620000   0.00000041
  0.16640000   0.00020151
  0.16640000   0.00014327
  0.16640000   0.00010191
  0.16640000   0.00007254
  0.16640000   0.00005168
  0.16640000   0.00003686
  0.16640000   0.00002633
  0.16640000   0.00001885
  0.16640000   0.00001353
  0.16640000   0.00000974
  0.16640000   0.00000705
  0.16640000   0.00000513
  0.16640000   0.00000377
  0.16640000   0.00000279
  0.16640000   0.00000209
  0.16640000   0.00000159
  0.16640000   0.00000123
  0.16640000   0.00000097
  0.16640000   0.00000078
  0.16640000   0.00000065
  0.16640000   0.00000055
  0.16640000   0.00000047
  0.16640000   0.00000041
  0.16660000   0.00020490
  0.16660000   0.00014578
  0.16660000   0.00010376
  0.16660000   0.00007390
  0.16660000   0.00005268
  0.16660000   0.00003760
  0.16660000   0.00002687
  0.16660000   0.00001925
  0.16660000   0.00001382
  0.16660000   0.00000996
  0.16660000   0.00000721
  0.16660000   0.00000525
  0.16660000   0.00000385
  0.16660000   0.00000285
  0.16660000   0.00000214
  0.16660000   0.00000162
  0.16660000   0.00000125
  0.16660000   0.00000099
  0.16660000   0.00000080
  0.16660000   0.00000066
  0.16660000   0.00000055
  0.16660000   0.00000048
  0.16660000   0.00000042
  0.16680000   0.00020835
  0.16680000   0.00014833
  0.16680000   0.00010565
  0.16680000   0.00007529
  0.16680000   0.00005371
  0.16680000   0.00003835
  0.16680000   0.00002743
  0.16680000   0.00001965
  0.16680000   0.00001412
  0.16680000   0.00001018
  0.16680000   0.00000737
  0.16680000   0.00000536
  0.16680000   0.00000393
  0.16680000   0.00000291
  0.16680000   0.00000218
  0.16680000   0.00000166
  0.16680000   0.00000128
  0.16680000   0.00000101
  0.16680000   0.00000081
  0.16680000   0.00000066
  0.16680000   0.00000056
  0.16680000   0.00000048
  0.16680000   0.00000042
  0.16700000   0.00021186
  0.16700000   0.00015092
  0.16700000   0.00010757
  0.16700000   0.00007671
  0.16700000   0.00005475
  0.16700000   0.00003912
  0.16700000   0.00002799
  0.16700000   0.00002007
  0.16700000   0.00001442
  0.16700000   0.00001040
  0.16700000   0.00000753
  0.16700000   0.00000548
  0.16700000   0.00000402
  0.16700000   0.00000298
  0.16700000   0.00000223
  0.16700000   0.00000169
  0.16700000   0.00000130
  0.16700000   0.00000102
  0.16700000   0.00000082
  0.16700000   0.00000067
  0.16700000   0.00000057
  0.16700000   0.00000048
  0.16700000   0.00000042
  0.16720000   0.00021542
  0.16720000   0.00015357
  0.16720000   0.00010952
  0.16720000   0.00007816
  0.16720000   0.00005582
  0.16720000   0.00003991
  0.16720000   0.00002857
  0.16720000   0.00002049
  0.16720000   0.00001473
  0.16720000   0.00001063
  0.16720000   0.00000770
  0.16720000   0.00000561
  0.16720000   0.00000411
  0.16720000   0.00000304
  0.16720000   0.00000228
  0.16720000   0.00000172
  0.16720000   0.00000133
  0.16720000   0.00000104
  0.16720000   0.00000083
  0.16720000   0.00000068
  0.16720000   0.00000057
  0.16720000   0.00000049
  0.16720000   0.00000043
  0.16740000   0.00021905
  0.16740000   0.00015626
  0.16740000   0.00011151
  0.16740000   0.00007963
  0.16740000   0.00005690
  0.16740000   0.00004071
  0.16740000   0.00002916
  0.16740000   0.00002092
  0.16740000   0.00001505
  0.16740000   0.00001086
  0.16740000   0.00000787
  0.16740000   0.00000573
  0.16740000   0.00000420
  0.16740000   0.00000311
  0.16740000   0.00000232
  0.16740000   0.00000176
  0.16740000   0.00000135
  0.16740000   0.00000106
  0.16740000   0.00000085
  0.16740000   0.00000069
  0.16740000   0.00000058
  0.16740000   0.00000049
  0.16740000   0.00000043
  0.16760000   0.00022274
  0.16760000   0.00015899
  0.16760000   0.00011354
  0.16760000   0.00008113
  0.16760000   0.00005801
  0.16760000   0.00004152
  0.16760000   0.00002976
  0.16760000   0.00002137
  0.16760000   0.00001538
  0.16760000   0.00001110
  0.16760000   0.00000804
  0.16760000   0.00000586
  0.16760000   0.00000430
  0.16760000   0.00000318
  0.16760000   0.00000237
  0.16760000   0.00000180
  0.16760000   0.00000138
  0.16760000   0.00000108
  0.16760000   0.00000086
  0.16760000   0.00000070
  0.16760000   0.00000059
  0.16760000   0.00000050
  0.16760000   0.00000044
  0.16780000   0.00022649
  0.16780000   0.00016178
  0.16780000   0.00011560
  0.16780000   0.00008265
  0.16780000   0.00005914
  0.16780000   0.00004236
  0.16780000   0.00003038
  0.16780000   0.00002182
  0.16780000   0.00001571
  0.16780000   0.00001135
  0.16780000   0.00000822
  0.16780000   0.00000599
  0.16780000   0.00000439
  0.16780000   0.00000325
  0.16780000   0.00000243
  0.16780000   0.00000184
  0.16780000   0.00000141
  0.16780000   0.00000110
  0.16780000   0.00000088
  0.16780000   0.00000071
  0.16780000   0.00000059
  0.16780000   0.00000051
  0.16780000   0.00000044
  0.16800000   0.00023030
  0.16800000   0.00016461
  0.16800000   0.00011770
  0.16800000   0.00008421
  0.16800000   0.00006029
  0.16800000   0.00004321
  0.16800000   0.00003100
  0.16800000   0.00002228
  0.16800000   0.00001605
  0.16800000   0.00001160
  0.16800000   0.00000841
  0.16800000   0.00000613
  0.16800000   0.00000449
  0.16800000   0.00000332
  0.16800000   0.00000248
  0.16800000   0.00000187
  0.16800000   0.00000144
  0.16800000   0.00000112
  0.16800000   0.00000089
  0.16800000   0.00000073
  0.16800000   0.00000060
  0.16800000   0.00000051
  0.16800000   0.00000044
  0.16820000   0.00023418
  0.16820000   0.00016749
  0.16820000   0.00011984
  0.16820000   0.00008580
  0.16820000   0.00006147
  0.16820000   0.00004408
  0.16820000   0.00003164
  0.16820000   0.00002276
  0.16820000   0.00001640
  0.16820000   0.00001185
  0.16820000   0.00000860
  0.16820000   0.00000627
  0.16820000   0.00000459
  0.16820000   0.00000340
  0.16820000   0.00000253
  0.16820000   0.00000191
  0.16820000   0.00000147
  0.16820000   0.00000114
  0.16820000   0.00000091
  0.16820000   0.00000074
  0.16820000   0.00000061
  0.16820000   0.00000052
  0.16820000   0.00000045
  0.16840000   0.00023812
  0.16840000   0.00017043
  0.16840000   0.00012202
  0.16840000   0.00008741
  0.16840000   0.00006266
  0.16840000   0.00004496
  0.16840000   0.00003230
  0.16840000   0.00002324
  0.16840000   0.00001676
  0.16840000   0.00001211
  0.16840000   0.00000879
  0.16840000   0.00000641
  0.16840000   0.00000470
  0.16840000   0.00000347
  0.16840000   0.00000259
  0.16840000   0.00000195
  0.16840000   0.00000150
  0.16840000   0.00000116
  0.16840000   0.00000092
  0.16840000   0.00000075
  0.16840000   0.00000062
  0.16840000   0.00000052
  0.16840000   0.00000045
  0.16860000   0.00024213
  0.16860000   0.00017341
  0.16860000   0.00012424
  0.16860000   0.00008906
  0.16860000   0.00006388
  0.16860000   0.00004587
  0.16860000   0.00003297
  0.16860000   0.00002373
  0.16860000   0.00001712
  0.16860000   0.00001238
  0.16860000   0.00000899
  0.16860000   0.00000655
  0.16860000   0.00000481
  0.16860000   0.00000355
  0.16860000   0.00000265
  0.16860000   0.00000200
  0.16860000   0.00000153
  0.16860000   0.00000119
  0.16860000   0.00000094
  0.16860000   0.00000076
  0.16860000   0.00000063
  0.16860000   0.00000053
  0.16860000   0.00000046
  0.16880000   0.00024621
  0.16880000   0.00017645
  0.16880000   0.00012650
  0.16880000   0.00009074
  0.16880000   0.00006513
  0.16880000   0.00004679
  0.16880000   0.00003365
  0.16880000   0.00002424
  0.16880000   0.00001749
  0.16880000   0.00001266
  0.16880000   0.00000919
  0.16880000   0.00000670
  0.16880000   0.00000491
  0.16880000   0.00000363
  0.16880000   0.00000271
  0.16880000   0.00000204
  0.16880000   0.00000156
  0.16880000   0.00000121
  0.16880000   0.00000096
  0.16880000   0.00000077
  0.16880000   0.00000064
  0.16880000   0.00000054
  0.16880000   0.00000046
  0.16900000   0.00025036
  0.16900000   0.00017954
  0.16900000   0.00012881
  0.16900000   0.00009245
  0.16900000   0.00006640
  0.16900000   0.00004773
  0.16900000   0.00003435
  0.16900000   0.00002475
  0.16900000   0.00001787
  0.16900000   0.00001294
  0.16900000   0.00000940
  0.16900000   0.00000685
  0.16900000   0.00000503
  0.16900000   0.00000371
  0.16900000   0.00000277
  0.16900000   0.00000208
  0.16900000   0.00000159
  0.16900000   0.00000123
  0.16900000   0.00000097
  0.16900000   0.00000079
  0.16900000   0.00000065
  0.16900000   0.00000054
  0.16900000   0.00000047
  0.16920000   0.00025458
  0.16920000   0.00018269
  0.16920000   0.00013115
  0.16920000   0.00009419
  0.16920000   0.00006769
  0.16920000   0.00004869
  0.16920000   0.00003506
  0.16920000   0.00002528
  0.16920000   0.00001826
  0.16920000   0.00001323
  0.16920000   0.00000961
  0.16920000   0.00000701
  0.16920000   0.00000514
  0.16920000   0.00000380
  0.16920000   0.00000283
  0.16920000   0.00000213
  0.16920000   0.00000163
  0.16920000   0.00000126
  0.16920000   0.00000099
  0.16920000   0.00000080
  0.16920000   0.00000066
  0.16920000   0.00000055
  0.16920000   0.00000047
  0.16940000   0.00025887
  0.16940000   0.00018589
  0.16940000   0.00013354
  0.16940000   0.00009597
  0.16940000   0.00006902
  0.16940000   0.00004967
  0.16940000   0.00003579
  0.16940000   0.00002582
  0.16940000   0.00001866
  0.16940000   0.00001352
  0.16940000   0.00000983
  0.16940000   0.00000717
  0.16940000   0.00000526
  0.16940000   0.00000389
  0.16940000   0.00000289
  0.16940000   0.00000218
  0.16940000   0.00000166
  0.16940000   0.00000128
  0.16940000   0.00000101
  0.16940000   0.00000081
  0.16940000   0.00000067
  0.16940000   0.00000056
  0.16940000   0.00000048
  0.16960000   0.00026323
  0.16960000   0.00018915
  0.16960000   0.00013597
  0.16960000   0.00009778
  0.16960000   0.00007036
  0.16960000   0.00005067
  0.16960000   0.00003653
  0.16960000   0.00002637
  0.16960000   0.00001907
  0.16960000   0.00001382
  0.16960000   0.00001005
  0.16960000   0.00000734
  0.16960000   0.00000538
  0.16960000   0.00000397
  0.16960000   0.00000296
  0.16960000   0.00000223
  0.16960000   0.00000170
  0.16960000   0.00000131
  0.16960000   0.00000103
  0.16960000   0.00000083
  0.16960000   0.00000068
  0.16960000   0.00000056
  0.16960000   0.00000048
  0.16980000   0.00026767
  0.16980000   0.00019247
  0.16980000   0.00013844
  0.16980000   0.00009963
  0.16980000   0.00007174
  0.16980000   0.00005169
  0.16980000   0.00003729
  0.16980000   0.00002693
  0.16980000   0.00001949
  0.16980000   0.00001413
  0.16980000   0.00001028
  0.16980000   0.00000750
  0.16980000   0.00000551
  0.16980000   0.00000407
  0.16980000   0.00000303
  0.16980000   0.00000228
  0.16980000   0.00000173
  0.16980000   0.00000134
  0.16980000   0.00000105
  0.16980000   0.00000084
  0.16980000   0.00000069
  0.16980000   0.00000057
  0.16980000   0.00000049
  0.17000000   0.00027218
  0.17000000   0.00019585
  0.17000000   0.00014097
  0.17000000   0.00010151
  0.17000000   0.00007314
  0.17000000   0.00005273
  0.17000000   0.00003806
  0.17000000   0.00002751
  0.17000000   0.00001991
  0.17000000   0.00001445
  0.17000000   0.00001051
  0.17000000   0.00000768
  0.17000000   0.00000563
  0.17000000   0.00000416
  0.17000000   0.00000310
  0.17000000   0.00000233
  0.17000000   0.00000177
  0.17000000   0.00000136
  0.17000000   0.00000107
  0.17000000   0.00000086
  0.17000000   0.00000070
  0.17000000   0.00000058
  0.17000000   0.00000049
  0.17020000   0.00027677
  0.17020000   0.00019928
  0.17020000   0.00014353
  0.17020000   0.00010342
  0.17020000   0.00007457
  0.17020000   0.00005380
  0.17020000   0.00003885
  0.17020000   0.00002809
  0.17020000   0.00002035
  0.17020000   0.00001477
  0.17020000   0.00001075
  0.17020000   0.00000785
  0.17020000   0.00000576
  0.17020000   0.00000426
  0.17020000   0.00000317
  0.17020000   0.00000238
  0.17020000   0.00000181
  0.17020000   0.00000139
  0.17020000   0.00000109
  0.17020000   0.00000087
  0.17020000   0.00000071
  0.17020000   0.00000059
  0.17020000   0.00000050
  0.17040000   0.00028143
  0.17040000   0.00020278
  0.17040000   0.00014615
  0.17040000   0.00010538
  0.17040000   0.00007602
  0.17040000   0.00005488
  0.17040000   0.00003966
  0.17040000   0.00002869
  0.17040000   0.00002079
  0.17040000   0.00001510
  0.17040000   0.00001099
  0.17040000   0.00000803
  0.17040000   0.00000590
  0.17040000   0.00000436
  0.17040000   0.00000324
  0.17040000   0.00000243
  0.17040000   0.00000185
  0.17040000   0.00000142
  0.17040000   0.00000111
  0.17040000   0.00000089
  0.17040000   0.00000072
  0.17040000   0.00000060
  0.17040000   0.00000051
  0.17060000   0.00028618
  0.17060000   0.00020633
  0.17060000   0.00014881
  0.17060000   0.00010737
  0.17060000   0.00007751
  0.17060000   0.00005599
  0.17060000   0.00004048
  0.17060000   0.00002931
  0.17060000   0.00002125
  0.17060000   0.00001544
  0.17060000   0.00001125
  0.17060000   0.00000822
  0.17060000   0.00000604
  0.17060000   0.00000446
  0.17060000   0.00000332
  0.17060000   0.00000249
  0.17060000   0.00000189
  0.17060000   0.00000145
  0.17060000   0.00000113
  0.17060000   0.00000090
  0.17060000   0.00000073
  0.17060000   0.00000061
  0.17060000   0.00000051
  0.17080000   0.00029100
  0.17080000   0.00020995
  0.17080000   0.00015152
  0.17080000   0.00010940
  0.17080000   0.00007902
  0.17080000   0.00005712
  0.17080000   0.00004133
  0.17080000   0.00002993
  0.17080000   0.00002171
  0.17080000   0.00001578
  0.17080000   0.00001150
  0.17080000   0.00000841
  0.17080000   0.00000618
  0.17080000   0.00000456
  0.17080000   0.00000339
  0.17080000   0.00000255
  0.17080000   0.00000193
  0.17080000   0.00000148
  0.17080000   0.00000116
  0.17080000   0.00000092
  0.17080000   0.00000074
  0.17080000   0.00000061
  0.17080000   0.00000052
  0.17100000   0.00029591
  0.17100000   0.00021364
  0.17100000   0.00015428
  0.17100000   0.00011146
  0.17100000   0.00008057
  0.17100000   0.00005827
  0.17100000   0.00004218
  0.17100000   0.00003057
  0.17100000   0.00002219
  0.17100000   0.00001614
  0.17100000   0.00001176
  0.17100000   0.00000861
  0.17100000   0.00000632
  0.17100000   0.00000467
  0.17100000   0.00000347
  0.17100000   0.00000260
  0.17100000   0.00000197
  0.17100000   0.00000152
  0.17100000   0.00000118
  0.17100000   0.00000094
  0.17100000   0.00000076
  0.17100000   0.00000062
  0.17100000   0.00000053
  0.17120000   0.00030090
  0.17120000   0.00021739
  0.17120000   0.00015710
  0.17120000   0.00011357
  0.17120000   0.00008214
  0.17120000   0.00005945
  0.17120000   0.00004306
  0.17120000   0.00003123
  0.17120000   0.00002268
  0.17120000   0.00001650
  0.17120000   0.00001203
  0.17120000   0.00000881
  0.17120000   0.00000647
  0.17120000   0.00000478
  0.17120000   0.00000355
  0.17120000   0.00000266
  0.17120000   0.00000202
  0.17120000   0.00000155
  0.17120000   0.00000121
  0.17120000   0.00000095
  0.17120000   0.00000077
  0.17120000   0.00000063
  0.17120000   0.00000053
  0.17140000   0.00030597
  0.17140000   0.00022120
  0.17140000   0.00015996
  0.17140000   0.00011571
  0.17140000   0.00008375
  0.17140000   0.00006065
  0.17140000   0.00004396
  0.17140000   0.00003190
  0.17140000   0.00002318
  0.17140000   0.00001687
  0.17140000   0.00001231
  0.17140000   0.00000901
  0.17140000   0.00000662
  0.17140000   0.00000489
  0.17140000   0.00000364
  0.17140000   0.00000273
  0.17140000   0.00000206
  0.17140000   0.00000158
  0.17140000   0.00000123
  0.17140000   0.00000097
  0.17140000   0.00000078
  0.17140000   0.00000064
  0.17140000   0.00000054
  0.17160000   0.00031113
  0.17160000   0.00022508
  0.17160000   0.00016287
  0.17160000   0.00011790
  0.17160000   0.00008539
  0.17160000   0.00006188
  0.17160000   0.00004488
  0.17160000   0.00003258
  0.17160000   0.00002368
  0.17160000   0.00001725
  0.17160000   0.00001259
  0.17160000   0.00000922
  0.17160000   0.00000678
  0.17160000   0.00000501
  0.17160000   0.00000372
  0.17160000   0.00000279
  0.17160000   0.00000211
  0.17160000   0.00000162
  0.17160000   0.00000126
  0.17160000   0.00000099
  0.17160000   0.00000080
  0.17160000   0.00000065
  0.17160000   0.00000055
  0.17180000   0.00031638
  0.17180000   0.00022903
  0.17180000   0.00016584
  0.17180000   0.00012013
  0.17180000   0.00008706
  0.17180000   0.00006313
  0.17180000   0.00004581
  0.17180000   0.00003328
  0.17180000   0.00002421
  0.17180000   0.00001764
  0.17180000   0.00001288
  0.17180000   0.00000943
  0.17180000   0.00000694
  0.17180000   0.00000513
  0.17180000   0.00000381
  0.17180000   0.00000285
  0.17180000   0.00000216
  0.17180000   0.00000165
  0.17180000   0.00000128
  0.17180000   0.00000101
  0.17180000   0.00000081
  0.17180000   0.00000066
  0.17180000   0.00000056
  0.17200000   0.00032172
  0.17200000   0.00023305
  0.17200000   0.00016887
  0.17200000   0.00012240
  0.17200000   0.00008876
  0.17200000   0.00006440
  0.17200000   0.00004676
  0.17200000   0.00003399
  0.17200000   0.00002474
  0.17200000   0.00001804
  0.17200000   0.00001318
  0.17200000   0.00000966
  0.17200000   0.00000710
  0.17200000   0.00000525
  0.17200000   0.00000390
  0.17200000   0.00000292
  0.17200000   0.00000221
  0.17200000   0.00000169
  0.17200000   0.00000131
  0.17200000   0.00000103
  0.17200000   0.00000083
  0.17200000   0.00000068
  0.17200000   0.00000056
  0.17220000   0.00032715
  0.17220000   0.00023715
  0.17220000   0.00017195
  0.17220000   0.00012472
  0.17220000   0.00009050
  0.17220000   0.00006571
  0.17220000   0.00004774
  0.17220000   0.00003472
  0.17220000   0.00002528
  0.17220000   0.00001844
  0.17220000   0.00001348
  0.17220000   0.00000988
  0.17220000   0.00000727
  0.17220000   0.00000537
  0.17220000   0.00000399
  0.17220000   0.00000299
  0.17220000   0.00000226
  0.17220000   0.00000173
  0.17220000   0.00000134
  0.17220000   0.00000105
  0.17220000   0.00000084
  0.17220000   0.00000069
  0.17220000   0.00000057
  0.17240000   0.00033267
  0.17240000   0.00024131
  0.17240000   0.00017508
  0.17240000   0.00012708
  0.17240000   0.00009227
  0.17240000   0.00006703
  0.17240000   0.00004874
  0.17240000   0.00003547
  0.17240000   0.00002584
  0.17240000   0.00001886
  0.17240000   0.00001379
  0.17240000   0.00001011
  0.17240000   0.00000744
  0.17240000   0.00000550
  0.17240000   0.00000409
  0.17240000   0.00000306
  0.17240000   0.00000231
  0.17240000   0.00000177
  0.17240000   0.00000137
  0.17240000   0.00000107
  0.17240000   0.00000086
  0.17240000   0.00000070
  0.17240000   0.00000058
  0.17260000   0.00033828
  0.17260000   0.00024555
  0.17260000   0.00017828
  0.17260000   0.00012948
  0.17260000   0.00009408
  0.17260000   0.00006839
  0.17260000   0.00004975
  0.17260000   0.00003623
  0.17260000   0.00002641
  0.17260000   0.00001928
  0.17260000   0.00001411
  0.17260000   0.00001035
  0.17260000   0.00000762
  0.17260000   0.00000563
  0.17260000   0.00000419
  0.17260000   0.00000313
  0.17260000   0.00000237
  0.17260000   0.00000181
  0.17260000   0.00000140
  0.17260000   0.00000110
  0.17260000   0.00000087
  0.17260000   0.00000071
  0.17260000   0.00000059
  0.17280000   0.00034399
  0.17280000   0.00024986
  0.17280000   0.00018153
  0.17280000   0.00013193
  0.17280000   0.00009592
  0.17280000   0.00006977
  0.17280000   0.00005079
  0.17280000   0.00003701
  0.17280000   0.00002699
  0.17280000   0.00001972
  0.17280000   0.00001443
  0.17280000   0.00001059
  0.17280000   0.00000780
  0.17280000   0.00000577
  0.17280000   0.00000429
  0.17280000   0.00000321
  0.17280000   0.00000242
  0.17280000   0.00000185
  0.17280000   0.00000143
  0.17280000   0.00000112
  0.17280000   0.00000089
  0.17280000   0.00000072
  0.17280000   0.00000060
  0.17300000   0.00034979
  0.17300000   0.00025425
  0.17300000   0.00018484
  0.17300000   0.00013443
  0.17300000   0.00009780
  0.17300000   0.00007119
  0.17300000   0.00005185
  0.17300000   0.00003780
  0.17300000   0.00002759
  0.17300000   0.00002017
  0.17300000   0.00001477
  0.17300000   0.00001084
  0.17300000   0.00000799
  0.17300000   0.00000591
  0.17300000   0.00000439
  0.17300000   0.00000329
  0.17300000   0.00000248
  0.17300000   0.00000189
  0.17300000   0.00000146
  0.17300000   0.00000114
  0.17300000   0.00000091
  0.17300000   0.00000074
  0.17300000   0.00000061
  0.17320000   0.00035570
  0.17320000   0.00025871
  0.17320000   0.00018822
  0.17320000   0.00013697
  0.17320000   0.00009971
  0.17320000   0.00007263
  0.17320000   0.00005293
  0.17320000   0.00003861
  0.17320000   0.00002820
  0.17320000   0.00002062
  0.17320000   0.00001511
  0.17320000   0.00001110
  0.17320000   0.00000818
  0.17320000   0.00000605
  0.17320000   0.00000450
  0.17320000   0.00000336
  0.17320000   0.00000254
  0.17320000   0.00000193
  0.17320000   0.00000149
  0.17320000   0.00000117
  0.17320000   0.00000093
  0.17320000   0.00000075
  0.17320000   0.00000062
  0.17340000   0.00036170
  0.17340000   0.00026326
  0.17340000   0.00019165
  0.17340000   0.00013956
  0.17340000   0.00010167
  0.17340000   0.00007410
  0.17340000   0.00005404
  0.17340000   0.00003944
  0.17340000   0.00002882
  0.17340000   0.00002109
  0.17340000   0.00001546
  0.17340000   0.00001136
  0.17340000   0.00000837
  0.17340000   0.00000619
  0.17340000   0.00000461
  0.17340000   0.00000345
  0.17340000   0.00000260
  0.17340000   0.00000198
  0.17340000   0.00000152
  0.17340000   0.00000119
  0.17340000   0.00000094
  0.17340000   0.00000076
  0.17340000   0.00000063
  0.17360000   0.00036781
  0.17360000   0.00026788
  0.17360000   0.00019515
  0.17360000   0.00014220
  0.17360000   0.00010366
  0.17360000   0.00007560
  0.17360000   0.00005517
  0.17360000   0.00004029
  0.17360000   0.00002946
  0.17360000   0.00002157
  0.17360000   0.00001582
  0.17360000   0.00001163
  0.17360000   0.00000857
  0.17360000   0.00000634
  0.17360000   0.00000472
  0.17360000   0.00000353
  0.17360000   0.00000266
  0.17360000   0.00000202
  0.17360000   0.00000156
  0.17360000   0.00000122
  0.17360000   0.00000096
  0.17360000   0.00000078
  0.17360000   0.00000064
  0.17380000   0.00037401
  0.17380000   0.00027259
  0.17380000   0.00019871
  0.17380000   0.00014490
  0.17380000   0.00010569
  0.17380000   0.00007713
  0.17380000   0.00005632
  0.17380000   0.00004116
  0.17380000   0.00003011
  0.17380000   0.00002206
  0.17380000   0.00001618
  0.17380000   0.00001190
  0.17380000   0.00000878
  0.17380000   0.00000650
  0.17380000   0.00000483
  0.17380000   0.00000362
  0.17380000   0.00000272
  0.17380000   0.00000207
  0.17380000   0.00000159
  0.17380000   0.00000124
  0.17380000   0.00000098
  0.17380000   0.00000079
  0.17380000   0.00000065
  0.17400000   0.00038033
  0.17400000   0.00027738
  0.17400000   0.00020234
  0.17400000   0.00014764
  0.17400000   0.00010776
  0.17400000   0.00007869
  0.17400000   0.00005750
  0.17400000   0.00004205
  0.17400000   0.00003078
  0.17400000   0.00002256
  0.17400000   0.00001656
  0.17400000   0.00001218
  0.17400000   0.00000899
  0.17400000   0.00000665
  0.17400000   0.00000495
  0.17400000   0.00000370
  0.17400000   0.00000279
  0.17400000   0.00000212
  0.17400000   0.00000163
  0.17400000   0.00000127
  0.17400000   0.00000100
  0.17400000   0.00000081
  0.17400000   0.00000066
  0.17420000   0.00038675
  0.17420000   0.00028226
  0.17420000   0.00020603
  0.17420000   0.00015044
  0.17420000   0.00010988
  0.17420000   0.00008029
  0.17420000   0.00005870
  0.17420000   0.00004295
  0.17420000   0.00003146
  0.17420000   0.00002307
  0.17420000   0.00001694
  0.17420000   0.00001247
  0.17420000   0.00000920
  0.17420000   0.00000682
  0.17420000   0.00000507
  0.17420000   0.00000379
  0.17420000   0.00000286
  0.17420000   0.00000217
  0.17420000   0.00000167
  0.17420000   0.00000130
  0.17420000   0.00000102
  0.17420000   0.00000082
  0.17420000   0.00000067
  0.17440000   0.00039328
  0.17440000   0.00028722
  0.17440000   0.00020980
  0.17440000   0.00015329
  0.17440000   0.00011203
  0.17440000   0.00008192
  0.17440000   0.00005993
  0.17440000   0.00004388
  0.17440000   0.00003215
  0.17440000   0.00002359
  0.17440000   0.00001734
  0.17440000   0.00001277
  0.17440000   0.00000943
  0.17440000   0.00000698
  0.17440000   0.00000520
  0.17440000   0.00000389
  0.17440000   0.00000293
  0.17440000   0.00000222
  0.17440000   0.00000171
  0.17440000   0.00000133
  0.17440000   0.00000105
  0.17440000   0.00000084
  0.17440000   0.00000068
  0.17460000   0.00039992
  0.17460000   0.00029226
  0.17460000   0.00021363
  0.17460000   0.00015619
  0.17460000   0.00011423
  0.17460000   0.00008358
  0.17460000   0.00006118
  0.17460000   0.00004482
  0.17460000   0.00003287
  0.17460000   0.00002413
  0.17460000   0.00001774
  0.17460000   0.00001307
  0.17460000   0.00000965
  0.17460000   0.00000715
  0.17460000   0.00000532
  0.17460000   0.00000398
  0.17460000   0.00000300
  0.17460000   0.00000228
  0.17460000   0.00000175
  0.17460000   0.00000136
  0.17460000   0.00000107
  0.17460000   0.00000085
  0.17460000   0.00000070
  0.17480000   0.00040667
  0.17480000   0.00029740
  0.17480000   0.00021753
  0.17480000   0.00015915
  0.17480000   0.00011647
  0.17480000   0.00008527
  0.17480000   0.00006247
  0.17480000   0.00004579
  0.17480000   0.00003360
  0.17480000   0.00002468
  0.17480000   0.00001815
  0.17480000   0.00001338
  0.17480000   0.00000989
  0.17480000   0.00000733
  0.17480000   0.00000545
  0.17480000   0.00000408
  0.17480000   0.00000307
  0.17480000   0.00000233
  0.17480000   0.00000179
  0.17480000   0.00000139
  0.17480000   0.00000109
  0.17480000   0.00000087
  0.17480000   0.00000071
  0.17500000   0.00041354
  0.17500000   0.00030263
  0.17500000   0.00022150
  0.17500000   0.00016216
  0.17500000   0.00011876
  0.17500000   0.00008700
  0.17500000   0.00006377
  0.17500000   0.00004678
  0.17500000   0.00003434
  0.17500000   0.00002524
  0.17500000   0.00001858
  0.17500000   0.00001370
  0.17500000   0.00001013
  0.17500000   0.00000751
  0.17500000   0.00000559
  0.17500000   0.00000418
  0.17500000   0.00000315
  0.17500000   0.00000239
  0.17500000   0.00000183
  0.17500000   0.00000142
  0.17500000   0.00000111
  0.17500000   0.00000089
  0.17500000   0.00000072
  0.17520000   0.00042053
  0.17520000   0.00030795
  0.17520000   0.00022555
  0.17520000   0.00016524
  0.17520000   0.00012109
  0.17520000   0.00008877
  0.17520000   0.00006511
  0.17520000   0.00004779
  0.17520000   0.00003510
  0.17520000   0.00002581
  0.17520000   0.00001901
  0.17520000   0.00001402
  0.17520000   0.00001037
  0.17520000   0.00000769
  0.17520000   0.00000573
  0.17520000   0.00000429
  0.17520000   0.00000323
  0.17520000   0.00000245
  0.17520000   0.00000187
  0.17520000   0.00000145
  0.17520000   0.00000114
  0.17520000   0.00000091
  0.17520000   0.00000073
  0.17540000   0.00042763
  0.17540000   0.00031336
  0.17540000   0.00022967
  0.17540000   0.00016837
  0.17540000   0.00012346
  0.17540000   0.00009057
  0.17540000   0.00006647
  0.17540000   0.00004882
  0.17540000   0.00003588
  0.17540000   0.00002640
  0.17540000   0.00001945
  0.17540000   0.00001436
  0.17540000   0.00001062
  0.17540000   0.00000788
  0.17540000   0.00000587
  0.17540000   0.00000439
  0.17540000   0.00000331
  0.17540000   0.00000251
  0.17540000   0.00000192
  0.17540000   0.00000148
  0.17540000   0.00000116
  0.17540000   0.00000093
  0.17540000   0.00000075
  0.17560000   0.00043485
  0.17560000   0.00031887
  0.17560000   0.00023387
  0.17560000   0.00017156
  0.17560000   0.00012589
  0.17560000   0.00009241
  0.17560000   0.00006787
  0.17560000   0.00004987
  0.17560000   0.00003668
  0.17560000   0.00002700
  0.17560000   0.00001991
  0.17560000   0.00001470
  0.17560000   0.00001088
  0.17560000   0.00000808
  0.17560000   0.00000602
  0.17560000   0.00000450
  0.17560000   0.00000339
  0.17560000   0.00000257
  0.17560000   0.00000197
  0.17560000   0.00000152
  0.17560000   0.00000119
  0.17560000   0.00000095
  0.17560000   0.00000076
  0.17580000   0.00044220
  0.17580000   0.00032448
  0.17580000   0.00023814
  0.17580000   0.00017481
  0.17580000   0.00012836
  0.17580000   0.00009429
  0.17580000   0.00006929
  0.17580000   0.00005095
  0.17580000   0.00003749
  0.17580000   0.00002762
  0.17580000   0.00002037
  0.17580000   0.00001505
  0.17580000   0.00001114
  0.17580000   0.00000827
  0.17580000   0.00000617
  0.17580000   0.00000461
  0.17580000   0.00000347
  0.17580000   0.00000263
  0.17580000   0.00000201
  0.17580000   0.00000156
  0.17580000   0.00000122
  0.17580000   0.00000097
  0.17580000   0.00000078
  0.17600000   0.00044967
  0.17600000   0.00033019
  0.17600000   0.00024249
  0.17600000   0.00017813
  0.17600000   0.00013088
  0.17600000   0.00009620
  0.17600000   0.00007074
  0.17600000   0.00005205
  0.17600000   0.00003833
  0.17600000   0.00002825
  0.17600000   0.00002085
  0.17600000   0.00001541
  0.17600000   0.00001142
  0.17600000   0.00000848
  0.17600000   0.00000632
  0.17600000   0.00000473
  0.17600000   0.00000356
  0.17600000   0.00000270
  0.17600000   0.00000206
  0.17600000   0.00000159
  0.17600000   0.00000124
  0.17600000   0.00000099
  0.17600000   0.00000079
  0.17620000   0.00045727
  0.17620000   0.00033599
  0.17620000   0.00024692
  0.17620000   0.00018150
  0.17620000   0.00013345
  0.17620000   0.00009815
  0.17620000   0.00007222
  0.17620000   0.00005317
  0.17620000   0.00003918
  0.17620000   0.00002889
  0.17620000   0.00002134
  0.17620000   0.00001578
  0.17620000   0.00001169
  0.17620000   0.00000869
  0.17620000   0.00000648
  0.17620000   0.00000485
  0.17620000   0.00000365
  0.17620000   0.00000277
  0.17620000   0.00000211
  0.17620000   0.00000163
  0.17620000   0.00000127
  0.17620000   0.00000101
  0.17620000   0.00000081
  0.17640000   0.00046499
  0.17640000   0.00034190
  0.17640000   0.00025144
  0.17640000   0.00018495
  0.17640000   0.00013607
  0.17640000   0.00010015
  0.17640000   0.00007374
  0.17640000   0.00005432
  0.17640000   0.00004005
  0.17640000   0.00002955
  0.17640000   0.00002183
  0.17640000   0.00001616
  0.17640000   0.00001198
  0.17640000   0.00000890
  0.17640000   0.00000664
  0.17640000   0.00000497
  0.17640000   0.00000374
  0.17640000   0.00000283
  0.17640000   0.00000216
  0.17640000   0.00000167
  0.17640000   0.00000130
  0.17640000   0.00000103
  0.17640000   0.00000083
  0.17660000   0.00047285
  0.17660000   0.00034792
  0.17660000   0.00025603
  0.17660000   0.00018845
  0.17660000   0.00013875
  0.17660000   0.00010218
  0.17660000   0.00007529
  0.17660000   0.00005550
  0.17660000   0.00004094
  0.17660000   0.00003023
  0.17660000   0.00002235
  0.17660000   0.00001654
  0.17660000   0.00001227
  0.17660000   0.00000912
  0.17660000   0.00000681
  0.17660000   0.00000510
  0.17660000   0.00000384
  0.17660000   0.00000291
  0.17660000   0.00000222
  0.17660000   0.00000171
  0.17660000   0.00000133
  0.17660000   0.00000105
  0.17660000   0.00000084
  0.17680000   0.00048084
  0.17680000   0.00035404
  0.17680000   0.00026072
  0.17680000   0.00019203
  0.17680000   0.00014147
  0.17680000   0.00010426
  0.17680000   0.00007687
  0.17680000   0.00005670
  0.17680000   0.00004185
  0.17680000   0.00003092
  0.17680000   0.00002287
  0.17680000   0.00001694
  0.17680000   0.00001257
  0.17680000   0.00000935
  0.17680000   0.00000698
  0.17680000   0.00000523
  0.17680000   0.00000393
  0.17680000   0.00000298
  0.17680000   0.00000227
  0.17680000   0.00000175
  0.17680000   0.00000136
  0.17680000   0.00000108
  0.17680000   0.00000086
  0.17700000   0.00048896
  0.17700000   0.00036027
  0.17700000   0.00026548
  0.17700000   0.00019567
  0.17700000   0.00014425
  0.17700000   0.00010638
  0.17700000   0.00007848
  0.17700000   0.00005793
  0.17700000   0.00004278
  0.17700000   0.00003163
  0.17700000   0.00002341
  0.17700000   0.00001735
  0.17700000   0.00001288
  0.17700000   0.00000958
  0.17700000   0.00000715
  0.17700000   0.00000536
  0.17700000   0.00000403
  0.17700000   0.00000305
  0.17700000   0.00000233
  0.17700000   0.00000179
  0.17700000   0.00000140
  0.17700000   0.00000110
  0.17700000   0.00000088
  0.17720000   0.00049723
  0.17720000   0.00036661
  0.17720000   0.00027034
  0.17720000   0.00019938
  0.17720000   0.00014709
  0.17720000   0.00010854
  0.17720000   0.00008013
  0.17720000   0.00005918
  0.17720000   0.00004374
  0.17720000   0.00003235
  0.17720000   0.00002395
  0.17720000   0.00001776
  0.17720000   0.00001319
  0.17720000   0.00000982
  0.17720000   0.00000733
  0.17720000   0.00000550
  0.17720000   0.00000414
  0.17720000   0.00000313
  0.17720000   0.00000239
  0.17720000   0.00000184
  0.17720000   0.00000143
  0.17720000   0.00000112
  0.17720000   0.00000090
  0.17740000   0.00050563
  0.17740000   0.00037306
  0.17740000   0.00027528
  0.17740000   0.00020317
  0.17740000   0.00014998
  0.17740000   0.00011075
  0.17740000   0.00008181
  0.17740000   0.00006046
  0.17740000   0.00004471
  0.17740000   0.00003309
  0.17740000   0.00002452
  0.17740000   0.00001819
  0.17740000   0.00001352
  0.17740000   0.00001007
  0.17740000   0.00000752
  0.17740000   0.00000564
  0.17740000   0.00000424
  0.17740000   0.00000321
  0.17740000   0.00000245
  0.17740000   0.00000188
  0.17740000   0.00000146
  0.17740000   0.00000115
  0.17740000   0.00000092
  0.17760000   0.00051418
  0.17760000   0.00037962
  0.17760000   0.00028031
  0.17760000   0.00020702
  0.17760000   0.00015293
  0.17760000   0.00011300
  0.17760000   0.00008353
  0.17760000   0.00006177
  0.17760000   0.00004571
  0.17760000   0.00003385
  0.17760000   0.00002509
  0.17760000   0.00001863
  0.17760000   0.00001385
  0.17760000   0.00001032
  0.17760000   0.00000771
  0.17760000   0.00000578
  0.17760000   0.00000435
  0.17760000   0.00000329
  0.17760000   0.00000251
  0.17760000   0.00000193
  0.17760000   0.00000150
  0.17760000   0.00000118
  0.17760000   0.00000094
  0.17780000   0.00052287
  0.17780000   0.00038630
  0.17780000   0.00028544
  0.17780000   0.00021095
  0.17780000   0.00015593
  0.17780000   0.00011530
  0.17780000   0.00008528
  0.17780000   0.00006311
  0.17780000   0.00004673
  0.17780000   0.00003463
  0.17780000   0.00002568
  0.17780000   0.00001907
  0.17780000   0.00001419
  0.17780000   0.00001058
  0.17780000   0.00000790
  0.17780000   0.00000593
  0.17780000   0.00000446
  0.17780000   0.00000338
  0.17780000   0.00000258
  0.17780000   0.00000198
  0.17780000   0.00000153
  0.17780000   0.00000120
  0.17780000   0.00000096
  0.17800000   0.00053171
  0.17800000   0.00039310
  0.17800000   0.00029066
  0.17800000   0.00021495
  0.17800000   0.00015900
  0.17800000   0.00011764
  0.17800000   0.00008707
  0.17800000   0.00006447
  0.17800000   0.00004777
  0.17800000   0.00003542
  0.17800000   0.00002629
  0.17800000   0.00001953
  0.17800000   0.00001454
  0.17800000   0.00001084
  0.17800000   0.00000810
  0.17800000   0.00000608
  0.17800000   0.00000458
  0.17800000   0.00000347
  0.17800000   0.00000264
  0.17800000   0.00000203
  0.17800000   0.00000157
  0.17800000   0.00000123
  0.17800000   0.00000098
  0.17820000   0.00054070
  0.17820000   0.00040002
  0.17820000   0.00029598
  0.17820000   0.00021903
  0.17820000   0.00016213
  0.17820000   0.00012003
  0.17820000   0.00008890
  0.17820000   0.00006587
  0.17820000   0.00004884
  0.17820000   0.00003623
  0.17820000   0.00002690
  0.17820000   0.00002000
  0.17820000   0.00001489
  0.17820000   0.00001111
  0.17820000   0.00000831
  0.17820000   0.00000624
  0.17820000   0.00000470
  0.17820000   0.00000356
  0.17820000   0.00000271
  0.17820000   0.00000208
  0.17820000   0.00000161
  0.17820000   0.00000126
  0.17820000   0.00000100
  0.17840000   0.00054984
  0.17840000   0.00040706
  0.17840000   0.00030139
  0.17840000   0.00022319
  0.17840000   0.00016531
  0.17840000   0.00012248
  0.17840000   0.00009077
  0.17840000   0.00006730
  0.17840000   0.00004993
  0.17840000   0.00003706
  0.17840000   0.00002754
  0.17840000   0.00002049
  0.17840000   0.00001526
  0.17840000   0.00001139
  0.17840000   0.00000852
  0.17840000   0.00000640
  0.17840000   0.00000482
  0.17840000   0.00000365
  0.17840000   0.00000278
  0.17840000   0.00000213
  0.17840000   0.00000165
  0.17840000   0.00000129
  0.17840000   0.00000102
  0.17860000   0.00055913
  0.17860000   0.00041422
  0.17860000   0.00030691
  0.17860000   0.00022743
  0.17860000   0.00016857
  0.17860000   0.00012497
  0.17860000   0.00009268
  0.17860000   0.00006876
  0.17860000   0.00005104
  0.17860000   0.00003791
  0.17860000   0.00002819
  0.17860000   0.00002098
  0.17860000   0.00001564
  0.17860000   0.00001168
  0.17860000   0.00000874
  0.17860000   0.00000656
  0.17860000   0.00000494
  0.17860000   0.00000374
  0.17860000   0.00000285
  0.17860000   0.00000219
  0.17860000   0.00000169
  0.17860000   0.00000132
  0.17860000   0.00000105
  0.17880000   0.00056859
  0.17880000   0.00042152
  0.17880000   0.00031252
  0.17880000   0.00023175
  0.17880000   0.00017188
  0.17880000   0.00012751
  0.17880000   0.00009463
  0.17880000   0.00007025
  0.17880000   0.00005218
  0.17880000   0.00003878
  0.17880000   0.00002885
  0.17880000   0.00002149
  0.17880000   0.00001602
  0.17880000   0.00001197
  0.17880000   0.00000896
  0.17880000   0.00000673
  0.17880000   0.00000507
  0.17880000   0.00000384
  0.17880000   0.00000292
  0.17880000   0.00000224
  0.17880000   0.00000173
  0.17880000   0.00000135
  0.17880000   0.00000107
  0.17900000   0.00057820
  0.17900000   0.00042894
  0.17900000   0.00031824
  0.17900000   0.00023615
  0.17900000   0.00017526
  0.17900000   0.00013011
  0.17900000   0.00009662
  0.17900000   0.00007177
  0.17900000   0.00005335
  0.17900000   0.00003967
  0.17900000   0.00002953
  0.17900000   0.00002200
  0.17900000   0.00001642
  0.17900000   0.00001227
  0.17900000   0.00000919
  0.17900000   0.00000690
  0.17900000   0.00000521
  0.17900000   0.00000394
  0.17900000   0.00000300
  0.17900000   0.00000230
  0.17900000   0.00000178
  0.17900000   0.00000139
  0.17900000   0.00000110
  0.17920000   0.00058798
  0.17920000   0.00043649
  0.17920000   0.00032407
  0.17920000   0.00024063
  0.17920000   0.00017871
  0.17920000   0.00013276
  0.17920000   0.00009865
  0.17920000   0.00007333
  0.17920000   0.00005454
  0.17920000   0.00004059
  0.17920000   0.00003023
  0.17920000   0.00002254
  0.17920000   0.00001682
  0.17920000   0.00001258
  0.17920000   0.00000943
  0.17920000   0.00000708
  0.17920000   0.00000534
  0.17920000   0.00000404
  0.17920000   0.00000308
  0.17920000   0.00000236
  0.17920000   0.00000182
  0.17920000   0.00000142
  0.17920000   0.00000112
  0.17940000   0.00059792
  0.17940000   0.00044417
  0.17940000   0.00033000
  0.17940000   0.00024520
  0.17940000   0.00018223
  0.17940000   0.00013546
  0.17940000   0.00010072
  0.17940000   0.00007492
  0.17940000   0.00005576
  0.17940000   0.00004152
  0.17940000   0.00003094
  0.17940000   0.00002308
  0.17940000   0.00001724
  0.17940000   0.00001290
  0.17940000   0.00000967
  0.17940000   0.00000727
  0.17940000   0.00000548
  0.17940000   0.00000415
  0.17940000   0.00000316
  0.17940000   0.00000242
  0.17940000   0.00000187
  0.17940000   0.00000146
  0.17940000   0.00000115
  0.17960000   0.00060803
  0.17960000   0.00045200
  0.17960000   0.00033604
  0.17960000   0.00024986
  0.17960000   0.00018582
  0.17960000   0.00013822
  0.17960000   0.00010284
  0.17960000   0.00007655
  0.17960000   0.00005700
  0.17960000   0.00004247
  0.17960000   0.00003167
  0.17960000   0.00002364
  0.17960000   0.00001767
  0.17960000   0.00001322
  0.17960000   0.00000992
  0.17960000   0.00000746
  0.17960000   0.00000563
  0.17960000   0.00000426
  0.17960000   0.00000324
  0.17960000   0.00000248
  0.17960000   0.00000192
  0.17960000   0.00000149
  0.17960000   0.00000118
  0.17980000   0.00061832
  0.17980000   0.00045995
  0.17980000   0.00034219
  0.17980000   0.00025461
  0.17980000   0.00018947
  0.17980000   0.00014103
  0.17980000   0.00010501
  0.17980000   0.00007821
  0.17980000   0.00005828
  0.17980000   0.00004345
  0.17980000   0.00003242
  0.17980000   0.00002421
  0.17980000   0.00001810
  0.17980000   0.00001356
  0.17980000   0.00001017
  0.17980000   0.00000765
  0.17980000   0.00000577
  0.17980000   0.00000437
  0.17980000   0.00000333
  0.17980000   0.00000255
  0.17980000   0.00000197
  0.17980000   0.00000153
  0.17980000   0.00000121
  0.18000000   0.00062877
  0.18000000   0.00046805
  0.18000000   0.00034845
  0.18000000   0.00025944
  0.18000000   0.00019320
  0.18000000   0.00014391
  0.18000000   0.00010722
  0.18000000   0.00007991
  0.18000000   0.00005958
  0.18000000   0.00004445
  0.18000000   0.00003318
  0.18000000   0.00002480
  0.18000000   0.00001855
  0.18000000   0.00001390
  0.18000000   0.00001043
  0.18000000   0.00000785
  0.18000000   0.00000593
  0.18000000   0.00000449
  0.18000000   0.00000342
  0.18000000   0.00000262
  0.18000000   0.00000202
  0.18000000   0.00000157
  0.18000000   0.00000123
  0.18020000   0.00063941
  0.18020000   0.00047630
  0.18020000   0.00035483
  0.18020000   0.00026437
  0.18020000   0.00019701
  0.18020000   0.00014684
  0.18020000   0.00010947
  0.18020000   0.00008164
  0.18020000   0.00006091
  0.18020000   0.00004547
  0.18020000   0.00003397
  0.18020000   0.00002540
  0.18020000   0.00001901
  0.18020000   0.00001425
  0.18020000   0.00001070
  0.18020000   0.00000806
  0.18020000   0.00000608
  0.18020000   0.00000461
  0.18020000   0.00000351
  0.18020000   0.00000269
  0.18020000   0.00000207
  0.18020000   0.00000161
  0.18020000   0.00000127
  0.18040000   0.00065022
  0.18040000   0.00048469
  0.18040000   0.00036133
  0.18040000   0.00026940
  0.18040000   0.00020089
  0.18040000   0.00014983
  0.18040000   0.00011178
  0.18040000   0.00008342
  0.18040000   0.00006228
  0.18040000   0.00004652
  0.18040000   0.00003477
  0.18040000   0.00002601
  0.18040000   0.00001948
  0.18040000   0.00001461
  0.18040000   0.00001098
  0.18040000   0.00000827
  0.18040000   0.00000624
  0.18040000   0.00000473
  0.18040000   0.00000360
  0.18040000   0.00000276
  0.18040000   0.00000213
  0.18040000   0.00000165
  0.18040000   0.00000130
  0.18060000   0.00066122
  0.18060000   0.00049322
  0.18060000   0.00036794
  0.18060000   0.00027452
  0.18060000   0.00020484
  0.18060000   0.00015288
  0.18060000   0.00011413
  0.18060000   0.00008523
  0.18060000   0.00006367
  0.18060000   0.00004759
  0.18060000   0.00003559
  0.18060000   0.00002664
  0.18060000   0.00001997
  0.18060000   0.00001498
  0.18060000   0.00001126
  0.18060000   0.00000848
  0.18060000   0.00000641
  0.18060000   0.00000486
  0.18060000   0.00000370
  0.18060000   0.00000283
  0.18060000   0.00000218
  0.18060000   0.00000169
  0.18060000   0.00000133
  0.18080000   0.00067241
  0.18080000   0.00050191
  0.18080000   0.00037468
  0.18080000   0.00027973
  0.18080000   0.00020888
  0.18080000   0.00015600
  0.18080000   0.00011653
  0.18080000   0.00008708
  0.18080000   0.00006510
  0.18080000   0.00004869
  0.18080000   0.00003644
  0.18080000   0.00002729
  0.18080000   0.00002046
  0.18080000   0.00001536
  0.18080000   0.00001155
  0.18080000   0.00000871
  0.18080000   0.00000658
  0.18080000   0.00000499
  0.18080000   0.00000380
  0.18080000   0.00000291
  0.18080000   0.00000224
  0.18080000   0.00000174
  0.18080000   0.00000136
  0.18100000   0.00068379
  0.18100000   0.00051075
  0.18100000   0.00038154
  0.18100000   0.00028505
  0.18100000   0.00021299
  0.18100000   0.00015918
  0.18100000   0.00011899
  0.18100000   0.00008897
  0.18100000   0.00006655
  0.18100000   0.00004981
  0.18100000   0.00003730
  0.18100000   0.00002795
  0.18100000   0.00002097
  0.18100000   0.00001575
  0.18100000   0.00001185
  0.18100000   0.00000894
  0.18100000   0.00000675
  0.18100000   0.00000512
  0.18100000   0.00000390
  0.18100000   0.00000299
  0.18100000   0.00000230
  0.18100000   0.00000178
  0.18100000   0.00000140
  0.18120000   0.00069535
  0.18120000   0.00051975
  0.18120000   0.00038853
  0.18120000   0.00029047
  0.18120000   0.00021719
  0.18120000   0.00016242
  0.18120000   0.00012150
  0.18120000   0.00009091
  0.18120000   0.00006805
  0.18120000   0.00005096
  0.18120000   0.00003818
  0.18120000   0.00002863
  0.18120000   0.00002149
  0.18120000   0.00001615
  0.18120000   0.00001216
  0.18120000   0.00000917
  0.18120000   0.00000693
  0.18120000   0.00000526
  0.18120000   0.00000401
  0.18120000   0.00000307
  0.18120000   0.00000236
  0.18120000   0.00000183
  0.18120000   0.00000143
  0.18140000   0.00070712
  0.18140000   0.00052891
  0.18140000   0.00039564
  0.18140000   0.00029599
  0.18140000   0.00022147
  0.18140000   0.00016573
  0.18140000   0.00012406
  0.18140000   0.00009288
  0.18140000   0.00006957
  0.18140000   0.00005213
  0.18140000   0.00003909
  0.18140000   0.00002933
  0.18140000   0.00002203
  0.18140000   0.00001656
  0.18140000   0.00001247
  0.18140000   0.00000941
  0.18140000   0.00000712
  0.18140000   0.00000540
  0.18140000   0.00000411
  0.18140000   0.00000315
  0.18140000   0.00000242
  0.18140000   0.00000188
  0.18140000   0.00000147
  0.18160000   0.00071908
  0.18160000   0.00053823
  0.18160000   0.00040289
  0.18160000   0.00030162
  0.18160000   0.00022583
  0.18160000   0.00016911
  0.18160000   0.00012667
  0.18160000   0.00009490
  0.18160000   0.00007113
  0.18160000   0.00005333
  0.18160000   0.00004001
  0.18160000   0.00003004
  0.18160000   0.00002258
  0.18160000   0.00001699
  0.18160000   0.00001280
  0.18160000   0.00000966
  0.18160000   0.00000731
  0.18160000   0.00000555
  0.18160000   0.00000423
  0.18160000   0.00000323
  0.18160000   0.00000249
  0.18160000   0.00000193
  0.18160000   0.00000151
  0.18180000   0.00073125
  0.18180000   0.00054771
  0.18180000   0.00041027
  0.18180000   0.00030735
  0.18180000   0.00023028
  0.18180000   0.00017256
  0.18180000   0.00012934
  0.18180000   0.00009697
  0.18180000   0.00007272
  0.18180000   0.00005456
  0.18180000   0.00004096
  0.18180000   0.00003077
  0.18180000   0.00002314
  0.18180000   0.00001742
  0.18180000   0.00001313
  0.18180000   0.00000992
  0.18180000   0.00000751
  0.18180000   0.00000570
  0.18180000   0.00000434
  0.18180000   0.00000332
  0.18180000   0.00000256
  0.18180000   0.00000198
  0.18180000   0.00000155
  0.18200000   0.00074363
  0.18200000   0.00055736
  0.18200000   0.00041779
  0.18200000   0.00031319
  0.18200000   0.00023482
  0.18200000   0.00017608
  0.18200000   0.00013206
  0.18200000   0.00009908
  0.18200000   0.00007435
  0.18200000   0.00005582
  0.18200000   0.00004193
  0.18200000   0.00003152
  0.18200000   0.00002371
  0.18200000   0.00001786
  0.18200000   0.00001347
  0.18200000   0.00001018
  0.18200000   0.00000771
  0.18200000   0.00000585
  0.18200000   0.00000446
  0.18200000   0.00000341
  0.18200000   0.00000263
  0.18200000   0.00000203
  0.18200000   0.00000159
  0.18220000   0.00075621
  0.18220000   0.00056718
  0.18220000   0.00042544
  0.18220000   0.00031915
  0.18220000   0.00023944
  0.18220000   0.00017967
  0.18220000   0.00013485
  0.18220000   0.00010123
  0.18220000   0.00007602
  0.18220000   0.00005711
  0.18220000   0.00004293
  0.18220000   0.00003229
  0.18220000   0.00002431
  0.18220000   0.00001832
  0.18220000   0.00001382
  0.18220000   0.00001045
  0.18220000   0.00000791
  0.18220000   0.00000601
  0.18220000   0.00000458
  0.18220000   0.00000351
  0.18220000   0.00000270
  0.18220000   0.00000209
  0.18220000   0.00000163
  0.18240000   0.00076901
  0.18240000   0.00057718
  0.18240000   0.00043323
  0.18240000   0.00032522
  0.18240000   0.00024416
  0.18240000   0.00018334
  0.18240000   0.00013769
  0.18240000   0.00010344
  0.18240000   0.00007773
  0.18240000   0.00005843
  0.18240000   0.00004395
  0.18240000   0.00003308
  0.18240000   0.00002491
  0.18240000   0.00001878
  0.18240000   0.00001418
  0.18240000   0.00001073
  0.18240000   0.00000813
  0.18240000   0.00000618
  0.18240000   0.00000471
  0.18240000   0.00000360
  0.18240000   0.00000277
  0.18240000   0.00000215
  0.18240000   0.00000167
  0.18260000   0.00078202
  0.18260000   0.00058735
  0.18260000   0.00044117
  0.18260000   0.00033140
  0.18260000   0.00024898
  0.18260000   0.00018708
  0.18260000   0.00014059
  0.18260000   0.00010569
  0.18260000   0.00007947
  0.18260000   0.00005978
  0.18260000   0.00004499
  0.18260000   0.00003388
  0.18260000   0.00002553
  0.18260000   0.00001926
  0.18260000   0.00001455
  0.18260000   0.00001101
  0.18260000   0.00000835
  0.18260000   0.00000634
  0.18260000   0.00000484
  0.18260000   0.00000370
  0.18260000   0.00000285
  0.18260000   0.00000220
  0.18260000   0.00000172
  0.18280000   0.00079526
  0.18280000   0.00059770
  0.18280000   0.00044925
  0.18280000   0.00033771
  0.18280000   0.00025388
  0.18280000   0.00019089
  0.18280000   0.00014356
  0.18280000   0.00010799
  0.18280000   0.00008125
  0.18280000   0.00006116
  0.18280000   0.00004606
  0.18280000   0.00003471
  0.18280000   0.00002617
  0.18280000   0.00001976
  0.18280000   0.00001493
  0.18280000   0.00001130
  0.18280000   0.00000857
  0.18280000   0.00000652
  0.18280000   0.00000497
  0.18280000   0.00000381
  0.18280000   0.00000293
  0.18280000   0.00000227
  0.18280000   0.00000177
  0.18300000   0.00080872
  0.18300000   0.00060824
  0.18300000   0.00045749
  0.18300000   0.00034413
  0.18300000   0.00025889
  0.18300000   0.00019479
  0.18300000   0.00014659
  0.18300000   0.00011034
  0.18300000   0.00008308
  0.18300000   0.00006257
  0.18300000   0.00004715
  0.18300000   0.00003555
  0.18300000   0.00002683
  0.18300000   0.00002026
  0.18300000   0.00001532
  0.18300000   0.00001160
  0.18300000   0.00000880
  0.18300000   0.00000670
  0.18300000   0.00000511
  0.18300000   0.00000391
  0.18300000   0.00000301
  0.18300000   0.00000233
  0.18300000   0.00000181
  0.18320000   0.00082241
  0.18320000   0.00061896
  0.18320000   0.00046587
  0.18320000   0.00035067
  0.18320000   0.00026399
  0.18320000   0.00019876
  0.18320000   0.00014968
  0.18320000   0.00011274
  0.18320000   0.00008494
  0.18320000   0.00006402
  0.18320000   0.00004827
  0.18320000   0.00003642
  0.18320000   0.00002750
  0.18320000   0.00002078
  0.18320000   0.00001572
  0.18320000   0.00001191
  0.18320000   0.00000904
  0.18320000   0.00000688
  0.18320000   0.00000525
  0.18320000   0.00000402
  0.18320000   0.00000309
  0.18320000   0.00000239
  0.18320000   0.00000186
  0.18340000   0.00083633
  0.18340000   0.00062987
  0.18340000   0.00047441
  0.18340000   0.00035735
  0.18340000   0.00026920
  0.18340000   0.00020282
  0.18340000   0.00015284
  0.18340000   0.00011520
  0.18340000   0.00008685
  0.18340000   0.00006550
  0.18340000   0.00004942
  0.18340000   0.00003731
  0.18340000   0.00002819
  0.18340000   0.00002131
  0.18340000   0.00001613
  0.18340000   0.00001223
  0.18340000   0.00000929
  0.18340000   0.00000707
  0.18340000   0.00000539
  0.18340000   0.00000413
  0.18340000   0.00000318
  0.18340000   0.00000246
  0.18340000   0.00000191
  0.18360000   0.00085049
  0.18360000   0.00064097
  0.18360000   0.00048310
  0.18360000   0.00036414
  0.18360000   0.00027451
  0.18360000   0.00020696
  0.18360000   0.00015606
  0.18360000   0.00011771
  0.18360000   0.00008880
  0.18360000   0.00006701
  0.18360000   0.00005060
  0.18360000   0.00003822
  0.18360000   0.00002889
  0.18360000   0.00002186
  0.18360000   0.00001655
  0.18360000   0.00001256
  0.18360000   0.00000954
  0.18360000   0.00000726
  0.18360000   0.00000554
  0.18360000   0.00000425
  0.18360000   0.00000327
  0.18360000   0.00000253
  0.18360000   0.00000197
  0.18380000   0.00086488
  0.18380000   0.00065227
  0.18380000   0.00049195
  0.18380000   0.00037107
  0.18380000   0.00027992
  0.18380000   0.00021119
  0.18380000   0.00015935
  0.18380000   0.00012027
  0.18380000   0.00009079
  0.18380000   0.00006856
  0.18380000   0.00005180
  0.18380000   0.00003915
  0.18380000   0.00002961
  0.18380000   0.00002242
  0.18380000   0.00001699
  0.18380000   0.00001289
  0.18380000   0.00000980
  0.18380000   0.00000746
  0.18380000   0.00000570
  0.18380000   0.00000437
  0.18380000   0.00000336
  0.18380000   0.00000260
  0.18380000   0.00000202
  0.18400000   0.00087953
  0.18400000   0.00066377
  0.18400000   0.00050097
  0.18400000   0.00037813
  0.18400000   0.00028544
  0.18400000   0.00021550
  0.18400000   0.00016272
  0.18400000   0.00012289
  0.18400000   0.00009283
  0.18400000   0.00007015
  0.18400000   0.00005303
  0.18400000   0.00004011
  0.18400000   0.00003036
  0.18400000   0.00002299
  0.18400000   0.00001743
  0.18400000   0.00001324
  0.18400000   0.00001006
  0.18400000   0.00000767
  0.18400000   0.00000586
  0.18400000   0.00000449
  0.18400000   0.00000345
  0.18400000   0.00000267
  0.18400000   0.00000208
  0.18420000   0.00089442
  0.18420000   0.00067547
  0.18420000   0.00051015
  0.18420000   0.00038533
  0.18420000   0.00029107
  0.18420000   0.00021990
  0.18420000   0.00016615
  0.18420000   0.00012557
  0.18420000   0.00009492
  0.18420000   0.00007177
  0.18420000   0.00005429
  0.18420000   0.00004109
  0.18420000   0.00003112
  0.18420000   0.00002358
  0.18420000   0.00001789
  0.18420000   0.00001359
  0.18420000   0.00001034
  0.18420000   0.00000788
  0.18420000   0.00000602
  0.18420000   0.00000462
  0.18420000   0.00000355
  0.18420000   0.00000275
  0.18420000   0.00000213
  0.18440000   0.00090956
  0.18440000   0.00068738
  0.18440000   0.00051951
  0.18440000   0.00039266
  0.18440000   0.00029681
  0.18440000   0.00022439
  0.18440000   0.00016966
  0.18440000   0.00012830
  0.18440000   0.00009705
  0.18440000   0.00007343
  0.18440000   0.00005558
  0.18440000   0.00004209
  0.18440000   0.00003190
  0.18440000   0.00002419
  0.18440000   0.00001836
  0.18440000   0.00001395
  0.18440000   0.00001062
  0.18440000   0.00000810
  0.18440000   0.00000619
  0.18440000   0.00000475
  0.18440000   0.00000365
  0.18440000   0.00000282
  0.18440000   0.00000219
  0.18460000   0.00092496
  0.18460000   0.00069950
  0.18460000   0.00052903
  0.18460000   0.00040013
  0.18460000   0.00030267
  0.18460000   0.00022897
  0.18460000   0.00017324
  0.18460000   0.00013110
  0.18460000   0.00009923
  0.18460000   0.00007513
  0.18460000   0.00005691
  0.18460000   0.00004312
  0.18460000   0.00003270
  0.18460000   0.00002481
  0.18460000   0.00001884
  0.18460000   0.00001433
  0.18460000   0.00001091
  0.18460000   0.00000832
  0.18460000   0.00000636
  0.18460000   0.00000488
  0.18460000   0.00000376
  0.18460000   0.00000290
  0.18460000   0.00000226
  0.18480000   0.00094062
  0.18480000   0.00071184
  0.18480000   0.00053873
  0.18480000   0.00040775
  0.18480000   0.00030864
  0.18480000   0.00023364
  0.18480000   0.00017690
  0.18480000   0.00013396
  0.18480000   0.00010146
  0.18480000   0.00007687
  0.18480000   0.00005826
  0.18480000   0.00004418
  0.18480000   0.00003352
  0.18480000   0.00002545
  0.18480000   0.00001934
  0.18480000   0.00001471
  0.18480000   0.00001121
  0.18480000   0.00000855
  0.18480000   0.00000654
  0.18480000   0.00000502
  0.18480000   0.00000386
  0.18480000   0.00000299
  0.18480000   0.00000232
  0.18500000   0.00095655
  0.18500000   0.00072439
  0.18500000   0.00054861
  0.18500000   0.00041551
  0.18500000   0.00031473
  0.18500000   0.00023842
  0.18500000   0.00018063
  0.18500000   0.00013688
  0.18500000   0.00010374
  0.18500000   0.00007865
  0.18500000   0.00005965
  0.18500000   0.00004526
  0.18500000   0.00003436
  0.18500000   0.00002610
  0.18500000   0.00001985
  0.18500000   0.00001511
  0.18500000   0.00001151
  0.18500000   0.00000879
  0.18500000   0.00000673
  0.18500000   0.00000516
  0.18500000   0.00000397
  0.18500000   0.00000307
  0.18500000   0.00000239
  0.18520000   0.00097275
  0.18520000   0.00073717
  0.18520000   0.00055866
  0.18520000   0.00042342
  0.18520000   0.00032094
  0.18520000   0.00024329
  0.18520000   0.00018445
  0.18520000   0.00013986
  0.18520000   0.00010608
  0.18520000   0.00008047
  0.18520000   0.00006107
  0.18520000   0.00004637
  0.18520000   0.00003522
  0.18520000   0.00002677
  0.18520000   0.00002037
  0.18520000   0.00001551
  0.18520000   0.00001183
  0.18520000   0.00000904
  0.18520000   0.00000692
  0.18520000   0.00000531
  0.18520000   0.00000409
  0.18520000   0.00000316
  0.18520000   0.00000245
  0.18540000   0.00098922
  0.18540000   0.00075017
  0.18540000   0.00056891
  0.18540000   0.00043148
  0.18540000   0.00032727
  0.18540000   0.00024826
  0.18540000   0.00018834
  0.18540000   0.00014291
  0.18540000   0.00010846
  0.18540000   0.00008234
  0.18540000   0.00006253
  0.18540000   0.00004750
  0.18540000   0.00003611
  0.18540000   0.00002746
  0.18540000   0.00002090
  0.18540000   0.00001593
  0.18540000   0.00001215
  0.18540000   0.00000929
  0.18540000   0.00000711
  0.18540000   0.00000546
  0.18540000   0.00000420
  0.18540000   0.00000325
  0.18540000   0.00000253
  0.18560000   0.00100598
  0.18560000   0.00076340
  0.18560000   0.00057934
  0.18560000   0.00043969
  0.18560000   0.00033373
  0.18560000   0.00025333
  0.18560000   0.00019232
  0.18560000   0.00014603
  0.18560000   0.00011090
  0.18560000   0.00008425
  0.18560000   0.00006402
  0.18560000   0.00004866
  0.18560000   0.00003701
  0.18560000   0.00002817
  0.18560000   0.00002145
  0.18560000   0.00001636
  0.18560000   0.00001249
  0.18560000   0.00000955
  0.18560000   0.00000731
  0.18560000   0.00000562
  0.18560000   0.00000433
  0.18560000   0.00000334
  0.18560000   0.00000260
  0.18580000   0.00102302
  0.18580000   0.00077686
  0.18580000   0.00058996
  0.18580000   0.00044806
  0.18580000   0.00034031
  0.18580000   0.00025850
  0.18580000   0.00019638
  0.18580000   0.00014921
  0.18580000   0.00011340
  0.18580000   0.00008620
  0.18580000   0.00006554
  0.18580000   0.00004986
  0.18580000   0.00003794
  0.18580000   0.00002889
  0.18580000   0.00002202
  0.18580000   0.00001680
  0.18580000   0.00001283
  0.18580000   0.00000981
  0.18580000   0.00000752
  0.18580000   0.00000578
  0.18580000   0.00000445
  0.18580000   0.00000344
  0.18580000   0.00000267
  0.18600000   0.00104034
  0.18600000   0.00079056
  0.18600000   0.00060078
  0.18600000   0.00045659
  0.18600000   0.00034703
  0.18600000   0.00026379
  0.18600000   0.00020053
  0.18600000   0.00015247
  0.18600000   0.00011595
  0.18600000   0.00008820
  0.18600000   0.00006711
  0.18600000   0.00005108
  0.18600000   0.00003890
  0.18600000   0.00002964
  0.18600000   0.00002260
  0.18600000   0.00001725
  0.18600000   0.00001318
  0.18600000   0.00001009
  0.18600000   0.00000773
  0.18600000   0.00000594
  0.18600000   0.00000458
  0.18600000   0.00000354
  0.18600000   0.00000275
  0.18620000   0.00105796
  0.18620000   0.00080451
  0.18620000   0.00061180
  0.18620000   0.00046528
  0.18620000   0.00035388
  0.18620000   0.00026918
  0.18620000   0.00020477
  0.18620000   0.00015580
  0.18620000   0.00011856
  0.18620000   0.00009024
  0.18620000   0.00006871
  0.18620000   0.00005233
  0.18620000   0.00003988
  0.18620000   0.00003040
  0.18620000   0.00002320
  0.18620000   0.00001771
  0.18620000   0.00001354
  0.18620000   0.00001037
  0.18620000   0.00000795
  0.18620000   0.00000611
  0.18620000   0.00000471
  0.18620000   0.00000364
  0.18620000   0.00000283
  0.18640000   0.00107588
  0.18640000   0.00081870
  0.18640000   0.00062302
  0.18640000   0.00047414
  0.18640000   0.00036087
  0.18640000   0.00027468
  0.18640000   0.00020910
  0.18640000   0.00015920
  0.18640000   0.00012123
  0.18640000   0.00009233
  0.18640000   0.00007035
  0.18640000   0.00005361
  0.18640000   0.00004088
  0.18640000   0.00003119
  0.18640000   0.00002381
  0.18640000   0.00001819
  0.18640000   0.00001392
  0.18640000   0.00001066
  0.18640000   0.00000818
  0.18640000   0.00000629
  0.18640000   0.00000485
  0.18640000   0.00000375
  0.18640000   0.00000291
  0.18660000   0.00109411
  0.18660000   0.00083314
  0.18660000   0.00063445
  0.18660000   0.00048317
  0.18660000   0.00036799
  0.18660000   0.00028029
  0.18660000   0.00021351
  0.18660000   0.00016267
  0.18660000   0.00012395
  0.18660000   0.00009447
  0.18660000   0.00007202
  0.18660000   0.00005493
  0.18660000   0.00004191
  0.18660000   0.00003199
  0.18660000   0.00002444
  0.18660000   0.00001868
  0.18660000   0.00001430
  0.18660000   0.00001096
  0.18660000   0.00000841
  0.18660000   0.00000647
  0.18660000   0.00000499
  0.18660000   0.00000386
  0.18660000   0.00000300
  0.18680000   0.00111264
  0.18680000   0.00084784
  0.18680000   0.00064609
  0.18680000   0.00049237
  0.18680000   0.00037525
  0.18680000   0.00028602
  0.18680000   0.00021803
  0.18680000   0.00016622
  0.18680000   0.00012674
  0.18680000   0.00009666
  0.18680000   0.00007374
  0.18680000   0.00005627
  0.18680000   0.00004296
  0.18680000   0.00003282
  0.18680000   0.00002508
  0.18680000   0.00001919
  0.18680000   0.00001469
  0.18680000   0.00001127
  0.18680000   0.00000865
  0.18680000   0.00000666
  0.18680000   0.00000514
  0.18680000   0.00000397
  0.18680000   0.00000309
  0.18700000   0.00113149
  0.18700000   0.00086280
  0.18700000   0.00065794
  0.18700000   0.00050175
  0.18700000   0.00038266
  0.18700000   0.00029186
  0.18700000   0.00022263
  0.18700000   0.00016985
  0.18700000   0.00012960
  0.18700000   0.00009891
  0.18700000   0.00007550
  0.18700000   0.00005766
  0.18700000   0.00004404
  0.18700000   0.00003366
  0.18700000   0.00002575
  0.18700000   0.00001971
  0.18700000   0.00001510
  0.18700000   0.00001158
  0.18700000   0.00000890
  0.18700000   0.00000685
  0.18700000   0.00000529
  0.18700000   0.00000409
  0.18700000   0.00000318
  0.18720000   0.00115066
  0.18720000   0.00087802
  0.18720000   0.00067001
  0.18720000   0.00051131
  0.18720000   0.00039022
  0.18720000   0.00029783
  0.18720000   0.00022734
  0.18720000   0.00017356
  0.18720000   0.00013252
  0.18720000   0.00010120
  0.18720000   0.00007731
  0.18720000   0.00005907
  0.18720000   0.00004515
  0.18720000   0.00003453
  0.18720000   0.00002643
  0.18720000   0.00002024
  0.18720000   0.00001552
  0.18720000   0.00001191
  0.18720000   0.00000915
  0.18720000   0.00000705
  0.18720000   0.00000544
  0.18720000   0.00000421
  0.18720000   0.00000327
  0.18740000   0.00117015
  0.18740000   0.00089351
  0.18740000   0.00068230
  0.18740000   0.00052104
  0.18740000   0.00039792
  0.18740000   0.00030392
  0.18740000   0.00023215
  0.18740000   0.00017734
  0.18740000   0.00013550
  0.18740000   0.00010355
  0.18740000   0.00007915
  0.18740000   0.00006052
  0.18740000   0.00004629
  0.18740000   0.00003543
  0.18740000   0.00002713
  0.18740000   0.00002079
  0.18740000   0.00001594
  0.18740000   0.00001224
  0.18740000   0.00000942
  0.18740000   0.00000725
  0.18740000   0.00000560
  0.18740000   0.00000434
  0.18740000   0.00000337
  0.18760000   0.00118998
  0.18760000   0.00090928
  0.18760000   0.00069482
  0.18760000   0.00053097
  0.18760000   0.00040578
  0.18760000   0.00031013
  0.18760000   0.00023705
  0.18760000   0.00018122
  0.18760000   0.00013855
  0.18760000   0.00010595
  0.18760000   0.00008104
  0.18760000   0.00006201
  0.18760000   0.00004746
  0.18760000   0.00003634
  0.18760000   0.00002784
  0.18760000   0.00002135
  0.18760000   0.00001638
  0.18760000   0.00001259
  0.18760000   0.00000968
  0.18760000   0.00000746
  0.18760000   0.00000577
  0.18760000   0.00000447
  0.18760000   0.00000347
  0.18780000   0.00121014
  0.18780000   0.00092532
  0.18780000   0.00070757
  0.18780000   0.00054108
  0.18780000   0.00041379
  0.18780000   0.00031647
  0.18780000   0.00024207
  0.18780000   0.00018517
  0.18780000   0.00014167
  0.18780000   0.00010841
  0.18780000   0.00008298
  0.18780000   0.00006353
  0.18780000   0.00004866
  0.18780000   0.00003728
  0.18780000   0.00002858
  0.18780000   0.00002193
  0.18780000   0.00001684
  0.18780000   0.00001294
  0.18780000   0.00000996
  0.18780000   0.00000768
  0.18780000   0.00000594
  0.18780000   0.00000460
  0.18780000   0.00000357
  0.18800000   0.00123065
  0.18800000   0.00094165
  0.18800000   0.00072055
  0.18800000   0.00055139
  0.18800000   0.00042197
  0.18800000   0.00032295
  0.18800000   0.00024718
  0.18800000   0.00018922
  0.18800000   0.00014486
  0.18800000   0.00011093
  0.18800000   0.00008496
  0.18800000   0.00006509
  0.18800000   0.00004988
  0.18800000   0.00003825
  0.18800000   0.00002934
  0.18800000   0.00002252
  0.18800000   0.00001730
  0.18800000   0.00001331
  0.18800000   0.00001025
  0.18800000   0.00000791
  0.18800000   0.00000611
  0.18800000   0.00000473
  0.18800000   0.00000368
  0.18820000   0.00125150
  0.18820000   0.00095827
  0.18820000   0.00073377
  0.18820000   0.00056189
  0.18820000   0.00043030
  0.18820000   0.00032955
  0.18820000   0.00025241
  0.18820000   0.00019335
  0.18820000   0.00014813
  0.18820000   0.00011350
  0.18820000   0.00008699
  0.18820000   0.00006669
  0.18820000   0.00005114
  0.18820000   0.00003924
  0.18820000   0.00003012
  0.18820000   0.00002313
  0.18820000   0.00001778
  0.18820000   0.00001368
  0.18820000   0.00001054
  0.18820000   0.00000814
  0.18820000   0.00000629
  0.18820000   0.00000488
  0.18820000   0.00000379
  0.18840000   0.00127271
  0.18840000   0.00097518
  0.18840000   0.00074724
  0.18840000   0.00057260
  0.18840000   0.00043880
  0.18840000   0.00033629
  0.18840000   0.00025775
  0.18840000   0.00019757
  0.18840000   0.00015147
  0.18840000   0.00011614
  0.18840000   0.00008907
  0.18840000   0.00006833
  0.18840000   0.00005243
  0.18840000   0.00004025
  0.18840000   0.00003092
  0.18840000   0.00002376
  0.18840000   0.00001828
  0.18840000   0.00001407
  0.18840000   0.00001085
  0.18840000   0.00000837
  0.18840000   0.00000648
  0.18840000   0.00000502
  0.18840000   0.00000390
  0.18860000   0.00129427
  0.18860000   0.00099239
  0.18860000   0.00076095
  0.18860000   0.00058351
  0.18860000   0.00044747
  0.18860000   0.00034317
  0.18860000   0.00026320
  0.18860000   0.00020189
  0.18860000   0.00015488
  0.18860000   0.00011884
  0.18860000   0.00009120
  0.18860000   0.00007001
  0.18860000   0.00005376
  0.18860000   0.00004129
  0.18860000   0.00003174
  0.18860000   0.00002441
  0.18860000   0.00001878
  0.18860000   0.00001447
  0.18860000   0.00001116
  0.18860000   0.00000862
  0.18860000   0.00000667
  0.18860000   0.00000517
  0.18860000   0.00000402
  0.18880000   0.00131621
  0.18880000   0.00100991
  0.18880000   0.00077491
  0.18880000   0.00059463
  0.18880000   0.00045631
  0.18880000   0.00035019
  0.18880000   0.00026877
  0.18880000   0.00020630
  0.18880000   0.00015837
  0.18880000   0.00012160
  0.18880000   0.00009338
  0.18880000   0.00007173
  0.18880000   0.00005511
  0.18880000   0.00004236
  0.18880000   0.00003258
  0.18880000   0.00002507
  0.18880000   0.00001930
  0.18880000   0.00001488
  0.18880000   0.00001148
  0.18880000   0.00000887
  0.18880000   0.00000687
  0.18880000   0.00000533
  0.18880000   0.00000414
  0.18900000   0.00133851
  0.18900000   0.00102773
  0.18900000   0.00078914
  0.18900000   0.00060596
  0.18900000   0.00046532
  0.18900000   0.00035735
  0.18900000   0.00027445
  0.18900000   0.00021081
  0.18900000   0.00016194
  0.18900000   0.00012442
  0.18900000   0.00009561
  0.18900000   0.00007349
  0.18900000   0.00005650
  0.18900000   0.00004346
  0.18900000   0.00003344
  0.18900000   0.00002575
  0.18900000   0.00001984
  0.18900000   0.00001530
  0.18900000   0.00001181
  0.18900000   0.00000913
  0.18900000   0.00000707
  0.18900000   0.00000549
  0.18900000   0.00000427
  0.18920000   0.00136120
  0.18920000   0.00104587
  0.18920000   0.00080362
  0.18920000   0.00061750
  0.18920000   0.00047452
  0.18920000   0.00036466
  0.18920000   0.00028026
  0.18920000   0.00021541
  0.18920000   0.00016559
  0.18920000   0.00012731
  0.18920000   0.00009790
  0.18920000   0.00007530
  0.18920000   0.00005793
  0.18920000   0.00004459
  0.18920000   0.00003433
  0.18920000   0.00002645
  0.18920000   0.00002039
  0.18920000   0.00001573
  0.18920000   0.00001215
  0.18920000   0.00000940
  0.18920000   0.00000728
  0.18920000   0.00000565
  0.18920000   0.00000440
  0.18940000   0.00138427
  0.18940000   0.00106433
  0.18940000   0.00081837
  0.18940000   0.00062927
  0.18940000   0.00048389
  0.18940000   0.00037212
  0.18940000   0.00028619
  0.18940000   0.00022012
  0.18940000   0.00016932
  0.18940000   0.00013027
  0.18940000   0.00010024
  0.18940000   0.00007715
  0.18940000   0.00005940
  0.18940000   0.00004574
  0.18940000   0.00003524
  0.18940000   0.00002717
  0.18940000   0.00002096
  0.18940000   0.00001618
  0.18940000   0.00001250
  0.18940000   0.00000968
  0.18940000   0.00000750
  0.18940000   0.00000582
  0.18940000   0.00000453
  0.18960000   0.00140773
  0.18960000   0.00108312
  0.18960000   0.00083339
  0.18960000   0.00064126
  0.18960000   0.00049345
  0.18960000   0.00037973
  0.18960000   0.00029224
  0.18960000   0.00022493
  0.18960000   0.00017314
  0.18960000   0.00013330
  0.18960000   0.00010264
  0.18960000   0.00007905
  0.18960000   0.00006090
  0.18960000   0.00004693
  0.18960000   0.00003618
  0.18960000   0.00002791
  0.18960000   0.00002154
  0.18960000   0.00001664
  0.18960000   0.00001287
  0.18960000   0.00000996
  0.18960000   0.00000772
  0.18960000   0.00000600
  0.18960000   0.00000467
  0.18980000   0.00143159
  0.18980000   0.00110224
  0.18980000   0.00084869
  0.18980000   0.00065348
  0.18980000   0.00050320
  0.18980000   0.00038750
  0.18980000   0.00029843
  0.18980000   0.00022985
  0.18980000   0.00017705
  0.18980000   0.00013639
  0.18980000   0.00010509
  0.18980000   0.00008099
  0.18980000   0.00006244
  0.18980000   0.00004815
  0.18980000   0.00003714
  0.18980000   0.00002867
  0.18980000   0.00002214
  0.18980000   0.00001711
  0.18980000   0.00001324
  0.18980000   0.00001025
  0.18980000   0.00000795
  0.18980000   0.00000618
  0.18980000   0.00000482
  0.19000000   0.00145585
  0.19000000   0.00112170
  0.19000000   0.00086427
  0.19000000   0.00066594
  0.19000000   0.00051315
  0.19000000   0.00039543
  0.19000000   0.00030474
  0.19000000   0.00023487
  0.19000000   0.00018104
  0.19000000   0.00013956
  0.19000000   0.00010761
  0.19000000   0.00008299
  0.19000000   0.00006401
  0.19000000   0.00004940
  0.19000000   0.00003813
  0.19000000   0.00002945
  0.19000000   0.00002276
  0.19000000   0.00001760
  0.19000000   0.00001362
  0.19000000   0.00001056
  0.19000000   0.00000819
  0.19000000   0.00000637
  0.19000000   0.00000496
  0.19020000   0.00148053
  0.19020000   0.00114150
  0.19020000   0.00088013
  0.19020000   0.00067863
  0.19020000   0.00052329
  0.19020000   0.00040352
  0.19020000   0.00031119
  0.19020000   0.00024001
  0.19020000   0.00018512
  0.19020000   0.00014281
  0.19020000   0.00011018
  0.19020000   0.00008503
  0.19020000   0.00006563
  0.19020000   0.00005068
  0.19020000   0.00003914
  0.19020000   0.00003025
  0.19020000   0.00002339
  0.19020000   0.00001810
  0.19020000   0.00001402
  0.19020000   0.00001087
  0.19020000   0.00000844
  0.19020000   0.00000656
  0.19020000   0.00000512
  0.19040000   0.00150563
  0.19040000   0.00116165
  0.19040000   0.00089629
  0.19040000   0.00069157
  0.19040000   0.00053363
  0.19040000   0.00041178
  0.19040000   0.00031778
  0.19040000   0.00024525
  0.19040000   0.00018930
  0.19040000   0.00014613
  0.19040000   0.00011282
  0.19040000   0.00008712
  0.19040000   0.00006729
  0.19040000   0.00005199
  0.19040000   0.00004019
  0.19040000   0.00003107
  0.19040000   0.00002404
  0.19040000   0.00001861
  0.19040000   0.00001442
  0.19040000   0.00001119
  0.19040000   0.00000869
  0.19040000   0.00000676
  0.19040000   0.00000527
  0.19060000   0.00153115
  0.19060000   0.00118216
  0.19060000   0.00091274
  0.19060000   0.00070475
  0.19060000   0.00054417
  0.19060000   0.00042021
  0.19060000   0.00032450
  0.19060000   0.00025061
  0.19060000   0.00019357
  0.19060000   0.00014953
  0.19060000   0.00011552
  0.19060000   0.00008927
  0.19060000   0.00006900
  0.19060000   0.00005334
  0.19060000   0.00004126
  0.19060000   0.00003192
  0.19060000   0.00002471
  0.19060000   0.00001914
  0.19060000   0.00001484
  0.19060000   0.00001152
  0.19060000   0.00000895
  0.19060000   0.00000697
  0.19060000   0.00000544
  0.19080000   0.00155711
  0.19080000   0.00120304
  0.19080000   0.00092950
  0.19080000   0.00071818
  0.19080000   0.00055493
  0.19080000   0.00042881
  0.19080000   0.00033137
  0.19080000   0.00025609
  0.19080000   0.00019794
  0.19080000   0.00015300
  0.19080000   0.00011829
  0.19080000   0.00009147
  0.19080000   0.00007074
  0.19080000   0.00005473
  0.19080000   0.00004235
  0.19080000   0.00003279
  0.19080000   0.00002540
  0.19080000   0.00001969
  0.19080000   0.00001527
  0.19080000   0.00001186
  0.19080000   0.00000922
  0.19080000   0.00000718
  0.19080000   0.00000560
  0.19100000   0.00158351
  0.19100000   0.00122428
  0.19100000   0.00094657
  0.19100000   0.00073187
  0.19100000   0.00056590
  0.19100000   0.00043759
  0.19100000   0.00033839
  0.19100000   0.00026169
  0.19100000   0.00020240
  0.19100000   0.00015656
  0.19100000   0.00012112
  0.19100000   0.00009372
  0.19100000   0.00007253
  0.19100000   0.00005615
  0.19100000   0.00004348
  0.19100000   0.00003369
  0.19100000   0.00002611
  0.19100000   0.00002025
  0.19100000   0.00001572
  0.19100000   0.00001221
  0.19100000   0.00000950
  0.19100000   0.00000740
  0.19100000   0.00000578
  0.19120000   0.00161035
  0.19120000   0.00124590
  0.19120000   0.00096395
  0.19120000   0.00074583
  0.19120000   0.00057709
  0.19120000   0.00044654
  0.19120000   0.00034555
  0.19120000   0.00026742
  0.19120000   0.00020697
  0.19120000   0.00016020
  0.19120000   0.00012402
  0.19120000   0.00009603
  0.19120000   0.00007437
  0.19120000   0.00005761
  0.19120000   0.00004464
  0.19120000   0.00003461
  0.19120000   0.00002684
  0.19120000   0.00002083
  0.19120000   0.00001618
  0.19120000   0.00001258
  0.19120000   0.00000979
  0.19120000   0.00000763
  0.19120000   0.00000596
  0.19140000   0.00163766
  0.19140000   0.00126790
  0.19140000   0.00098165
  0.19140000   0.00076005
  0.19140000   0.00058849
  0.19140000   0.00045568
  0.19140000   0.00035287
  0.19140000   0.00027327
  0.19140000   0.00021164
  0.19140000   0.00016393
  0.19140000   0.00012699
  0.19140000   0.00009839
  0.19140000   0.00007625
  0.19140000   0.00005911
  0.19140000   0.00004583
  0.19140000   0.00003555
  0.19140000   0.00002759
  0.19140000   0.00002142
  0.19140000   0.00001665
  0.19140000   0.00001295
  0.19140000   0.00001008
  0.19140000   0.00000786
  0.19140000   0.00000614
  0.19160000   0.00166542
  0.19160000   0.00129029
  0.19160000   0.00099967
  0.19160000   0.00077454
  0.19160000   0.00060013
  0.19160000   0.00046501
  0.19160000   0.00036034
  0.19160000   0.00027924
  0.19160000   0.00021642
  0.19160000   0.00016774
  0.19160000   0.00013003
  0.19160000   0.00010082
  0.19160000   0.00007818
  0.19160000   0.00006064
  0.19160000   0.00004705
  0.19160000   0.00003652
  0.19160000   0.00002836
  0.19160000   0.00002204
  0.19160000   0.00001713
  0.19160000   0.00001333
  0.19160000   0.00001039
  0.19160000   0.00000810
  0.19160000   0.00000633
  0.19180000   0.00169366
  0.19180000   0.00131307
  0.19180000   0.00101803
  0.19180000   0.00078931
  0.19180000   0.00061199
  0.19180000   0.00047453
  0.19180000   0.00036797
  0.19180000   0.00028535
  0.19180000   0.00022130
  0.19180000   0.00017165
  0.19180000   0.00013315
  0.19180000   0.00010330
  0.19180000   0.00008016
  0.19180000   0.00006222
  0.19180000   0.00004831
  0.19180000   0.00003752
  0.19180000   0.00002915
  0.19180000   0.00002266
  0.19180000   0.00001763
  0.19180000   0.00001373
  0.19180000   0.00001070
  0.19180000   0.00000835
  0.19180000   0.00000653
  0.19200000   0.00172238
  0.19200000   0.00133626
  0.19200000   0.00103673
  0.19200000   0.00080436
  0.19200000   0.00062409
  0.19200000   0.00048425
  0.19200000   0.00037576
  0.19200000   0.00029159
  0.19200000   0.00022630
  0.19200000   0.00017564
  0.19200000   0.00013634
  0.19200000   0.00010585
  0.19200000   0.00008219
  0.19200000   0.00006384
  0.19200000   0.00004959
  0.19200000   0.00003854
  0.19200000   0.00002997
  0.19200000   0.00002331
  0.19200000   0.00001815
  0.19200000   0.00001414
  0.19200000   0.00001103
  0.19200000   0.00000861
  0.19200000   0.00000673
  0.19220000   0.00175158
  0.19220000   0.00135986
  0.19220000   0.00105576
  0.19220000   0.00081969
  0.19220000   0.00063643
  0.19220000   0.00049416
  0.19220000   0.00038371
  0.19220000   0.00029797
  0.19220000   0.00023141
  0.19220000   0.00017973
  0.19220000   0.00013961
  0.19220000   0.00010846
  0.19220000   0.00008427
  0.19220000   0.00006550
  0.19220000   0.00005092
  0.19220000   0.00003960
  0.19220000   0.00003081
  0.19220000   0.00002398
  0.19220000   0.00001868
  0.19220000   0.00001456
  0.19220000   0.00001136
  0.19220000   0.00000887
  0.19220000   0.00000694
  0.19240000   0.00178129
  0.19240000   0.00138388
  0.19240000   0.00107515
  0.19240000   0.00083533
  0.19240000   0.00064902
  0.19240000   0.00050428
  0.19240000   0.00039184
  0.19240000   0.00030449
  0.19240000   0.00023663
  0.19240000   0.00018391
  0.19240000   0.00014295
  0.19240000   0.00011113
  0.19240000   0.00008641
  0.19240000   0.00006720
  0.19240000   0.00005228
  0.19240000   0.00004068
  0.19240000   0.00003167
  0.19240000   0.00002467
  0.19240000   0.00001922
  0.19240000   0.00001499
  0.19240000   0.00001170
  0.19240000   0.00000915
  0.19240000   0.00000716
  0.19260000   0.00181149
  0.19260000   0.00140832
  0.19260000   0.00109490
  0.19260000   0.00085126
  0.19260000   0.00066185
  0.19260000   0.00051461
  0.19260000   0.00040014
  0.19260000   0.00031115
  0.19260000   0.00024197
  0.19260000   0.00018819
  0.19260000   0.00014638
  0.19260000   0.00011387
  0.19260000   0.00008860
  0.19260000   0.00006895
  0.19260000   0.00005367
  0.19260000   0.00004179
  0.19260000   0.00003256
  0.19260000   0.00002537
  0.19260000   0.00001978
  0.19260000   0.00001544
  0.19260000   0.00001206
  0.19260000   0.00000943
  0.19260000   0.00000738
  0.19280000   0.00184221
  0.19280000   0.00143319
  0.19280000   0.00111501
  0.19280000   0.00086749
  0.19280000   0.00067494
  0.19280000   0.00052514
  0.19280000   0.00040862
  0.19280000   0.00031796
  0.19280000   0.00024744
  0.19280000   0.00019257
  0.19280000   0.00014989
  0.19280000   0.00011668
  0.19280000   0.00009085
  0.19280000   0.00007074
  0.19280000   0.00005511
  0.19280000   0.00004294
  0.19280000   0.00003347
  0.19280000   0.00002610
  0.19280000   0.00002036
  0.19280000   0.00001590
  0.19280000   0.00001243
  0.19280000   0.00000972
  0.19280000   0.00000762
  0.19300000   0.00187346
  0.19300000   0.00145851
  0.19300000   0.00113549
  0.19300000   0.00088403
  0.19300000   0.00068828
  0.19300000   0.00053590
  0.19300000   0.00041727
  0.19300000   0.00032492
  0.19300000   0.00025303
  0.19300000   0.00019706
  0.19300000   0.00015348
  0.19300000   0.00011956
  0.19300000   0.00009315
  0.19300000   0.00007259
  0.19300000   0.00005658
  0.19300000   0.00004411
  0.19300000   0.00003440
  0.19300000   0.00002685
  0.19300000   0.00002096
  0.19300000   0.00001637
  0.19300000   0.00001280
  0.19300000   0.00001002
  0.19300000   0.00000785
  0.19320000   0.00190523
  0.19320000   0.00148427
  0.19320000   0.00115635
  0.19320000   0.00090090
  0.19320000   0.00070190
  0.19320000   0.00054687
  0.19320000   0.00042611
  0.19320000   0.00033203
  0.19320000   0.00025874
  0.19320000   0.00020164
  0.19320000   0.00015716
  0.19320000   0.00012251
  0.19320000   0.00009551
  0.19320000   0.00007448
  0.19320000   0.00005809
  0.19320000   0.00004532
  0.19320000   0.00003537
  0.19320000   0.00002762
  0.19320000   0.00002157
  0.19320000   0.00001686
  0.19320000   0.00001319
  0.19320000   0.00001033
  0.19320000   0.00000810
  0.19340000   0.00193754
  0.19340000   0.00151049
  0.19340000   0.00117759
  0.19340000   0.00091808
  0.19340000   0.00071578
  0.19340000   0.00055807
  0.19340000   0.00043514
  0.19340000   0.00033930
  0.19340000   0.00026458
  0.19340000   0.00020634
  0.19340000   0.00016093
  0.19340000   0.00012553
  0.19340000   0.00009793
  0.19340000   0.00007642
  0.19340000   0.00005964
  0.19340000   0.00004656
  0.19340000   0.00003636
  0.19340000   0.00002841
  0.19340000   0.00002221
  0.19340000   0.00001737
  0.19340000   0.00001360
  0.19340000   0.00001065
  0.19340000   0.00000836
  0.19360000   0.00197040
  0.19360000   0.00153717
  0.19360000   0.00119922
  0.19360000   0.00093559
  0.19360000   0.00072994
  0.19360000   0.00056951
  0.19360000   0.00044435
  0.19360000   0.00034672
  0.19360000   0.00027056
  0.19360000   0.00021114
  0.19360000   0.00016479
  0.19360000   0.00012863
  0.19360000   0.00010042
  0.19360000   0.00007841
  0.19360000   0.00006123
  0.19360000   0.00004783
  0.19360000   0.00003738
  0.19360000   0.00002922
  0.19360000   0.00002286
  0.19360000   0.00001789
  0.19360000   0.00001401
  0.19360000   0.00001098
  0.19360000   0.00000862
  0.19380000   0.00200382
  0.19380000   0.00156433
  0.19380000   0.00122125
  0.19380000   0.00095344
  0.19380000   0.00074437
  0.19380000   0.00058117
  0.19380000   0.00045377
  0.19380000   0.00035431
  0.19380000   0.00027667
  0.19380000   0.00021606
  0.19380000   0.00016874
  0.19380000   0.00013180
  0.19380000   0.00010296
  0.19380000   0.00008045
  0.19380000   0.00006287
  0.19380000   0.00004915
  0.19380000   0.00003843
  0.19380000   0.00003006
  0.19380000   0.00002353
  0.19380000   0.00001842
  0.19380000   0.00001444
  0.19380000   0.00001132
  0.19380000   0.00000889
  0.19400000   0.00203781
  0.19400000   0.00159197
  0.19400000   0.00124369
  0.19400000   0.00097163
  0.19400000   0.00075910
  0.19400000   0.00059308
  0.19400000   0.00046338
  0.19400000   0.00036207
  0.19400000   0.00028292
  0.19400000   0.00022109
  0.19400000   0.00017279
  0.19400000   0.00013506
  0.19400000   0.00010558
  0.19400000   0.00008255
  0.19400000   0.00006455
  0.19400000   0.00005049
  0.19400000   0.00003951
  0.19400000   0.00003092
  0.19400000   0.00002422
  0.19400000   0.00001897
  0.19400000   0.00001488
  0.19400000   0.00001168
  0.19400000   0.00000917
  0.19420000   0.00207238
  0.19420000   0.00162009
  0.19420000   0.00126654
  0.19420000   0.00099016
  0.19420000   0.00077411
  0.19420000   0.00060522
  0.19420000   0.00047320
  0.19420000   0.00036999
  0.19420000   0.00028931
  0.19420000   0.00022624
  0.19420000   0.00017694
  0.19420000   0.00013839
  0.19420000   0.00010826
  0.19420000   0.00008470
  0.19420000   0.00006628
  0.19420000   0.00005188
  0.19420000   0.00004062
  0.19420000   0.00003181
  0.19420000   0.00002493
  0.19420000   0.00001954
  0.19420000   0.00001533
  0.19420000   0.00001204
  0.19420000   0.00000946
  0.19440000   0.00210753
  0.19440000   0.00164872
  0.19440000   0.00128981
  0.19440000   0.00100905
  0.19440000   0.00078943
  0.19440000   0.00061762
  0.19440000   0.00048323
  0.19440000   0.00037809
  0.19440000   0.00029585
  0.19440000   0.00023151
  0.19440000   0.00018118
  0.19440000   0.00014181
  0.19440000   0.00011100
  0.19440000   0.00008690
  0.19440000   0.00006805
  0.19440000   0.00005330
  0.19440000   0.00004176
  0.19440000   0.00003273
  0.19440000   0.00002566
  0.19440000   0.00002013
  0.19440000   0.00001580
  0.19440000   0.00001241
  0.19440000   0.00000976
  0.19460000   0.00214328
  0.19460000   0.00167785
  0.19460000   0.00131350
  0.19460000   0.00102830
  0.19460000   0.00080504
  0.19460000   0.00063028
  0.19460000   0.00049347
  0.19460000   0.00038637
  0.19460000   0.00030254
  0.19460000   0.00023691
  0.19460000   0.00018553
  0.19460000   0.00014531
  0.19460000   0.00011382
  0.19460000   0.00008917
  0.19460000   0.00006987
  0.19460000   0.00005476
  0.19460000   0.00004293
  0.19460000   0.00003367
  0.19460000   0.00002641
  0.19460000   0.00002073
  0.19460000   0.00001628
  0.19460000   0.00001280
  0.19460000   0.00001007
  0.19480000   0.00217964
  0.19480000   0.00170749
  0.19480000   0.00133764
  0.19480000   0.00104792
  0.19480000   0.00082097
  0.19480000   0.00064319
  0.19480000   0.00050393
  0.19480000   0.00039483
  0.19480000   0.00030937
  0.19480000   0.00024243
  0.19480000   0.00018998
  0.19480000   0.00014890
  0.19480000   0.00011671
  0.19480000   0.00009149
  0.19480000   0.00007174
  0.19480000   0.00005626
  0.19480000   0.00004414
  0.19480000   0.00003463
  0.19480000   0.00002719
  0.19480000   0.00002135
  0.19480000   0.00001678
  0.19480000   0.00001320
  0.19480000   0.00001039
  0.19500000   0.00221662
  0.19500000   0.00173766
  0.19500000   0.00136222
  0.19500000   0.00106791
  0.19500000   0.00083721
  0.19500000   0.00065637
  0.19500000   0.00051461
  0.19500000   0.00040348
  0.19500000   0.00031636
  0.19500000   0.00024807
  0.19500000   0.00019454
  0.19500000   0.00015257
  0.19500000   0.00011967
  0.19500000   0.00009388
  0.19500000   0.00007366
  0.19500000   0.00005781
  0.19500000   0.00004538
  0.19500000   0.00003563
  0.19500000   0.00002799
  0.19500000   0.00002200
  0.19500000   0.00001730
  0.19500000   0.00001361
  0.19500000   0.00001072
  0.19520000   0.00225422
  0.19520000   0.00176837
  0.19520000   0.00138725
  0.19520000   0.00108829
  0.19520000   0.00085378
  0.19520000   0.00066982
  0.19520000   0.00052551
  0.19520000   0.00041231
  0.19520000   0.00032351
  0.19520000   0.00025385
  0.19520000   0.00019921
  0.19520000   0.00015634
  0.19520000   0.00012271
  0.19520000   0.00009633
  0.19520000   0.00007563
  0.19520000   0.00005939
  0.19520000   0.00004665
  0.19520000   0.00003666
  0.19520000   0.00002881
  0.19520000   0.00002266
  0.19520000   0.00001783
  0.19520000   0.00001404
  0.19520000   0.00001106
  0.19540000   0.00229247
  0.19540000   0.00179961
  0.19540000   0.00141274
  0.19540000   0.00110906
  0.19540000   0.00087067
  0.19540000   0.00068354
  0.19540000   0.00053665
  0.19540000   0.00042134
  0.19540000   0.00033083
  0.19540000   0.00025977
  0.19540000   0.00020399
  0.19540000   0.00016020
  0.19540000   0.00012583
  0.19540000   0.00009884
  0.19540000   0.00007765
  0.19540000   0.00006102
  0.19540000   0.00004796
  0.19540000   0.00003771
  0.19540000   0.00002966
  0.19540000   0.00002334
  0.19540000   0.00001837
  0.19540000   0.00001447
  0.19540000   0.00001141
  0.19560000   0.00233136
  0.19560000   0.00183142
  0.19560000   0.00143870
  0.19560000   0.00113022
  0.19560000   0.00088790
  0.19560000   0.00069755
  0.19560000   0.00054803
  0.19560000   0.00043057
  0.19560000   0.00033830
  0.19560000   0.00026582
  0.19560000   0.00020889
  0.19560000   0.00016416
  0.19560000   0.00012902
  0.19560000   0.00010142
  0.19560000   0.00007973
  0.19560000   0.00006270
  0.19560000   0.00004931
  0.19560000   0.00003880
  0.19560000   0.00003053
  0.19560000   0.00002404
  0.19560000   0.00001894
  0.19560000   0.00001493
  0.19560000   0.00001178
  0.19580000   0.00237091
  0.19580000   0.00186378
  0.19580000   0.00146514
  0.19580000   0.00115179
  0.19580000   0.00090547
  0.19580000   0.00071185
  0.19580000   0.00055964
  0.19580000   0.00044000
  0.19580000   0.00034595
  0.19580000   0.00027202
  0.19580000   0.00021390
  0.19580000   0.00016822
  0.19580000   0.00013230
  0.19580000   0.00010407
  0.19580000   0.00008187
  0.19580000   0.00006442
  0.19580000   0.00005070
  0.19580000   0.00003991
  0.19580000   0.00003143
  0.19580000   0.00002476
  0.19580000   0.00001952
  0.19580000   0.00001539
  0.19580000   0.00001215
  0.19600000   0.00241114
  0.19600000   0.00189672
  0.19600000   0.00149207
  0.19600000   0.00117377
  0.19600000   0.00092339
  0.19600000   0.00072643
  0.19600000   0.00057151
  0.19600000   0.00044964
  0.19600000   0.00035377
  0.19600000   0.00027836
  0.19600000   0.00021904
  0.19600000   0.00017237
  0.19600000   0.00013566
  0.19600000   0.00010678
  0.19600000   0.00008406
  0.19600000   0.00006619
  0.19600000   0.00005213
  0.19600000   0.00004106
  0.19600000   0.00003236
  0.19600000   0.00002551
  0.19600000   0.00002012
  0.19600000   0.00001588
  0.19600000   0.00001254
  0.19620000   0.00245205
  0.19620000   0.00193024
  0.19620000   0.00151949
  0.19620000   0.00119617
  0.19620000   0.00094166
  0.19620000   0.00074132
  0.19620000   0.00058362
  0.19620000   0.00045949
  0.19620000   0.00036177
  0.19620000   0.00028485
  0.19620000   0.00022430
  0.19620000   0.00017663
  0.19620000   0.00013911
  0.19620000   0.00010957
  0.19620000   0.00008631
  0.19620000   0.00006801
  0.19620000   0.00005359
  0.19620000   0.00004225
  0.19620000   0.00003331
  0.19620000   0.00002628
  0.19620000   0.00002074
  0.19620000   0.00001637
  0.19620000   0.00001294
  0.19640000   0.00249366
  0.19640000   0.00196435
  0.19640000   0.00154742
  0.19640000   0.00121899
  0.19640000   0.00096030
  0.19640000   0.00075652
  0.19640000   0.00059600
  0.19640000   0.00046955
  0.19640000   0.00036995
  0.19640000   0.00029149
  0.19640000   0.00022968
  0.19640000   0.00018100
  0.19640000   0.00014264
  0.19640000   0.00011243
  0.19640000   0.00008863
  0.19640000   0.00006987
  0.19640000   0.00005510
  0.19640000   0.00004346
  0.19640000   0.00003429
  0.19640000   0.00002707
  0.19640000   0.00002137
  0.19640000   0.00001689
  0.19640000   0.00001335
  0.19660000   0.00253597
  0.19660000   0.00199907
  0.19660000   0.00157586
  0.19660000   0.00124226
  0.19660000   0.00097930
  0.19660000   0.00077202
  0.19660000   0.00060863
  0.19660000   0.00047984
  0.19660000   0.00037831
  0.19660000   0.00029828
  0.19660000   0.00023520
  0.19660000   0.00018547
  0.19660000   0.00014627
  0.19660000   0.00011536
  0.19660000   0.00009100
  0.19660000   0.00007179
  0.19660000   0.00005665
  0.19660000   0.00004472
  0.19660000   0.00003530
  0.19660000   0.00002788
  0.19660000   0.00002203
  0.19660000   0.00001742
  0.19660000   0.00001378
  0.19680000   0.00257901
  0.19680000   0.00203440
  0.19680000   0.00160482
  0.19680000   0.00126597
  0.19680000   0.00099868
  0.19680000   0.00078785
  0.19680000   0.00062154
  0.19680000   0.00049035
  0.19680000   0.00038687
  0.19680000   0.00030524
  0.19680000   0.00024085
  0.19680000   0.00019005
  0.19680000   0.00014998
  0.19680000   0.00011837
  0.19680000   0.00009344
  0.19680000   0.00007377
  0.19680000   0.00005825
  0.19680000   0.00004600
  0.19680000   0.00003634
  0.19680000   0.00002872
  0.19680000   0.00002271
  0.19680000   0.00001796
  0.19680000   0.00001422
  0.19700000   0.00262277
  0.19700000   0.00207036
  0.19700000   0.00163432
  0.19700000   0.00129013
  0.19700000   0.00101845
  0.19700000   0.00080400
  0.19700000   0.00063472
  0.19700000   0.00050109
  0.19700000   0.00039562
  0.19700000   0.00031236
  0.19700000   0.00024663
  0.19700000   0.00019475
  0.19700000   0.00015380
  0.19700000   0.00012147
  0.19700000   0.00009594
  0.19700000   0.00007580
  0.19700000   0.00005989
  0.19700000   0.00004733
  0.19700000   0.00003742
  0.19700000   0.00002959
  0.19700000   0.00002341
  0.19700000   0.00001853
  0.19700000   0.00001467
  0.19720000   0.00266728
  0.19720000   0.00210696
  0.19720000   0.00166436
  0.19720000   0.00131476
  0.19720000   0.00103861
  0.19720000   0.00082048
  0.19720000   0.00064817
  0.19720000   0.00051207
  0.19720000   0.00040456
  0.19720000   0.00031964
  0.19720000   0.00025256
  0.19720000   0.00019957
  0.19720000   0.00015771
  0.19720000   0.00012464
  0.19720000   0.00009852
  0.19720000   0.00007788
  0.19720000   0.00006158
  0.19720000   0.00004870
  0.19720000   0.00003852
  0.19720000   0.00003048
  0.19720000   0.00002413
  0.19720000   0.00001911
  0.19720000   0.00001514
  0.19740000   0.00271255
  0.19740000   0.00214420
  0.19740000   0.00169496
  0.19740000   0.00133985
  0.19740000   0.00105917
  0.19740000   0.00083730
  0.19740000   0.00066192
  0.19740000   0.00052329
  0.19740000   0.00041371
  0.19740000   0.00032709
  0.19740000   0.00025862
  0.19740000   0.00020450
  0.19740000   0.00016171
  0.19740000   0.00012789
  0.19740000   0.00010116
  0.19740000   0.00008002
  0.19740000   0.00006331
  0.19740000   0.00005010
  0.19740000   0.00003966
  0.19740000   0.00003140
  0.19740000   0.00002487
  0.19740000   0.00001971
  0.19740000   0.00001563
  0.19760000   0.00275858
  0.19760000   0.00218210
  0.19760000   0.00172611
  0.19760000   0.00136543
  0.19760000   0.00108013
  0.19760000   0.00085446
  0.19760000   0.00067596
  0.19760000   0.00053476
  0.19760000   0.00042307
  0.19760000   0.00033472
  0.19760000   0.00026484
  0.19760000   0.00020956
  0.19760000   0.00016583
  0.19760000   0.00013123
  0.19760000   0.00010387
  0.19760000   0.00008222
  0.19760000   0.00006510
  0.19760000   0.00005155
  0.19760000   0.00004083
  0.19760000   0.00003235
  0.19760000   0.00002564
  0.19760000   0.00002033
  0.19760000   0.00001613
  0.19780000   0.00280540
  0.19780000   0.00222068
  0.19780000   0.00175785
  0.19780000   0.00139150
  0.19780000   0.00110151
  0.19780000   0.00087198
  0.19780000   0.00069029
  0.19780000   0.00054648
  0.19780000   0.00043264
  0.19780000   0.00034253
  0.19780000   0.00027120
  0.19780000   0.00021474
  0.19780000   0.00017004
  0.19780000   0.00013466
  0.19780000   0.00010665
  0.19780000   0.00008448
  0.19780000   0.00006693
  0.19780000   0.00005304
  0.19780000   0.00004204
  0.19780000   0.00003333
  0.19780000   0.00002643
  0.19780000   0.00002097
  0.19780000   0.00001665
  0.19800000   0.00285301
  0.19800000   0.00225993
  0.19800000   0.00179016
  0.19800000   0.00141806
  0.19800000   0.00112332
  0.19800000   0.00088986
  0.19800000   0.00070493
  0.19800000   0.00055845
  0.19800000   0.00044242
  0.19800000   0.00035052
  0.19800000   0.00027772
  0.19800000   0.00022005
  0.19800000   0.00017437
  0.19800000   0.00013818
  0.19800000   0.00010952
  0.19800000   0.00008681
  0.19800000   0.00006882
  0.19800000   0.00005457
  0.19800000   0.00004328
  0.19800000   0.00003433
  0.19800000   0.00002725
  0.19800000   0.00002163
  0.19800000   0.00001718
  0.19820000   0.00290143
  0.19820000   0.00229988
  0.19820000   0.00182307
  0.19820000   0.00144513
  0.19820000   0.00114556
  0.19820000   0.00090810
  0.19820000   0.00071988
  0.19820000   0.00057069
  0.19820000   0.00045243
  0.19820000   0.00035869
  0.19820000   0.00028439
  0.19820000   0.00022549
  0.19820000   0.00017880
  0.19820000   0.00014179
  0.19820000   0.00011245
  0.19820000   0.00008920
  0.19820000   0.00007076
  0.19820000   0.00005614
  0.19820000   0.00004456
  0.19820000   0.00003537
  0.19820000   0.00002809
  0.19820000   0.00002231
  0.19820000   0.00001773
  0.19840000   0.00295068
  0.19840000   0.00234054
  0.19840000   0.00185659
  0.19840000   0.00147272
  0.19840000   0.00116824
  0.19840000   0.00092672
  0.19840000   0.00073515
  0.19840000   0.00058320
  0.19840000   0.00046267
  0.19840000   0.00036706
  0.19840000   0.00029122
  0.19840000   0.00023107
  0.19840000   0.00018335
  0.19840000   0.00014550
  0.19840000   0.00011547
  0.19840000   0.00009165
  0.19840000   0.00007276
  0.19840000   0.00005777
  0.19840000   0.00004587
  0.19840000   0.00003644
  0.19840000   0.00002895
  0.19840000   0.00002302
  0.19840000   0.00001830
  0.19860000   0.00300076
  0.19860000   0.00238192
  0.19860000   0.00189073
  0.19860000   0.00150084
  0.19860000   0.00119137
  0.19860000   0.00094573
  0.19860000   0.00075075
  0.19860000   0.00059598
  0.19860000   0.00047313
  0.19860000   0.00037562
  0.19860000   0.00029822
  0.19860000   0.00023678
  0.19860000   0.00018801
  0.19860000   0.00014930
  0.19860000   0.00011857
  0.19860000   0.00009417
  0.19860000   0.00007481
  0.19860000   0.00005943
  0.19860000   0.00004723
  0.19860000   0.00003754
  0.19860000   0.00002985
  0.19860000   0.00002374
  0.19860000   0.00001889
  0.19880000   0.00305170
  0.19880000   0.00242404
  0.19880000   0.00192549
  0.19880000   0.00152949
  0.19880000   0.00121496
  0.19880000   0.00096512
  0.19880000   0.00076667
  0.19880000   0.00060904
  0.19880000   0.00048384
  0.19880000   0.00038439
  0.19880000   0.00030539
  0.19880000   0.00024264
  0.19880000   0.00019279
  0.19880000   0.00015320
  0.19880000   0.00012175
  0.19880000   0.00009677
  0.19880000   0.00007692
  0.19880000   0.00006115
  0.19880000   0.00004863
  0.19880000   0.00003868
  0.19880000   0.00003077
  0.19880000   0.00002449
  0.19880000   0.00001950
  0.19900000   0.00310350
  0.19900000   0.00246690
  0.19900000   0.00196089
  0.19900000   0.00155870
  0.19900000   0.00123901
  0.19900000   0.00098491
  0.19900000   0.00078294
  0.19900000   0.00062239
  0.19900000   0.00049479
  0.19900000   0.00039335
  0.19900000   0.00031273
  0.19900000   0.00024864
  0.19900000   0.00019770
  0.19900000   0.00015721
  0.19900000   0.00012502
  0.19900000   0.00009943
  0.19900000   0.00007909
  0.19900000   0.00006292
  0.19900000   0.00005007
  0.19900000   0.00003985
  0.19900000   0.00003172
  0.19900000   0.00002526
  0.19900000   0.00002013
  0.19920000   0.00315618
  0.19920000   0.00251051
  0.19920000   0.00199695
  0.19920000   0.00158846
  0.19920000   0.00126355
  0.19920000   0.00100511
  0.19920000   0.00079954
  0.19920000   0.00063604
  0.19920000   0.00050598
  0.19920000   0.00040253
  0.19920000   0.00032025
  0.19920000   0.00025479
  0.19920000   0.00020273
  0.19920000   0.00016132
  0.19920000   0.00012837
  0.19920000   0.00010217
  0.19920000   0.00008132
  0.19920000   0.00006474
  0.19920000   0.00005155
  0.19920000   0.00004105
  0.19920000   0.00003270
  0.19920000   0.00002606
  0.19920000   0.00002077
  0.19940000   0.00320976
  0.19940000   0.00255490
  0.19940000   0.00203367
  0.19940000   0.00161879
  0.19940000   0.00128857
  0.19940000   0.00102572
  0.19940000   0.00081651
  0.19940000   0.00064998
  0.19940000   0.00051743
  0.19940000   0.00041192
  0.19940000   0.00032794
  0.19940000   0.00026110
  0.19940000   0.00020789
  0.19940000   0.00016553
  0.19940000   0.00013182
  0.19940000   0.00010498
  0.19940000   0.00008362
  0.19940000   0.00006661
  0.19940000   0.00005307
  0.19940000   0.00004229
  0.19940000   0.00003371
  0.19940000   0.00002688
  0.19940000   0.00002144
  0.19960000   0.00326425
  0.19960000   0.00260008
  0.19960000   0.00207106
  0.19960000   0.00164970
  0.19960000   0.00131408
  0.19960000   0.00104676
  0.19960000   0.00083383
  0.19960000   0.00066423
  0.19960000   0.00052914
  0.19960000   0.00042154
  0.19960000   0.00033583
  0.19960000   0.00026756
  0.19960000   0.00021318
  0.19960000   0.00016986
  0.19960000   0.00013536
  0.19960000   0.00010787
  0.19960000   0.00008598
  0.19960000   0.00006854
  0.19960000   0.00005464
  0.19960000   0.00004358
  0.19960000   0.00003476
  0.19960000   0.00002773
  0.19960000   0.00002214
  0.19980000   0.00331966
  0.19980000   0.00264606
  0.19980000   0.00210915
  0.19980000   0.00168120
  0.19980000   0.00134010
  0.19980000   0.00106823
  0.19980000   0.00085152
  0.19980000   0.00067879
  0.19980000   0.00054111
  0.19980000   0.00043137
  0.19980000   0.00034390
  0.19980000   0.00027418
  0.19980000   0.00021860
  0.19980000   0.00017430
  0.19980000   0.00013899
  0.19980000   0.00011084
  0.19980000   0.00008841
  0.19980000   0.00007052
  0.19980000   0.00005626
  0.19980000   0.00004489
  0.19980000   0.00003583
  0.19980000   0.00002861
  0.19980000   0.00002285
  0.20000000   0.00337602
  0.20000000   0.00269285
  0.20000000   0.00214794
  0.20000000   0.00171331
  0.20000000   0.00136664
  0.20000000   0.00109014
  0.20000000   0.00086959
  0.20000000   0.00069367
  0.20000000   0.00055336
  0.20000000   0.00044144
  0.20000000   0.00035217
  0.20000000   0.00028096
  0.20000000   0.00022417
  0.20000000   0.00017886
  0.20000000   0.00014272
  0.20000000   0.00011390
  0.20000000   0.00009090
  0.20000000   0.00007256
  0.20000000   0.00005793
  0.20000000   0.00004625
  0.20000000   0.00003694
  0.20000000   0.00002951
  0.20000000   0.00002359
  0.20020000   0.00343334
  0.20020000   0.00274047
  0.20020000   0.00218744
  0.20020000   0.00174603
  0.20020000   0.00139371
  0.20020000   0.00111250
  0.20020000   0.00088804
  0.20020000   0.00070888
  0.20020000   0.00056588
  0.20020000   0.00045174
  0.20020000   0.00036064
  0.20020000   0.00028792
  0.20020000   0.00022987
  0.20020000   0.00018354
  0.20020000   0.00014656
  0.20020000   0.00011704
  0.20020000   0.00009347
  0.20020000   0.00007466
  0.20020000   0.00005964
  0.20020000   0.00004766
  0.20020000   0.00003809
  0.20020000   0.00003045
  0.20020000   0.00002435
  0.20040000   0.00349163
  0.20040000   0.00278893
  0.20040000   0.00222767
  0.20040000   0.00177937
  0.20040000   0.00142131
  0.20040000   0.00113532
  0.20040000   0.00090688
  0.20040000   0.00072443
  0.20040000   0.00057869
  0.20040000   0.00046229
  0.20040000   0.00036931
  0.20040000   0.00029504
  0.20040000   0.00023572
  0.20040000   0.00018834
  0.20040000   0.00015049
  0.20040000   0.00012026
  0.20040000   0.00009611
  0.20040000   0.00007682
  0.20040000   0.00006141
  0.20040000   0.00004910
  0.20040000   0.00003927
  0.20040000   0.00003141
  0.20040000   0.00002513
  0.20060000   0.00355091
  0.20060000   0.00283825
  0.20060000   0.00226864
  0.20060000   0.00181336
  0.20060000   0.00144946
  0.20060000   0.00115860
  0.20060000   0.00092613
  0.20060000   0.00074031
  0.20060000   0.00059179
  0.20060000   0.00047308
  0.20060000   0.00037819
  0.20060000   0.00030235
  0.20060000   0.00024172
  0.20060000   0.00019327
  0.20060000   0.00015453
  0.20060000   0.00012357
  0.20060000   0.00009883
  0.20060000   0.00007904
  0.20060000   0.00006323
  0.20060000   0.00005059
  0.20060000   0.00004048
  0.20060000   0.00003240
  0.20060000   0.00002595
  0.20080000   0.00361120
  0.20080000   0.00288844
  0.20080000   0.00231036
  0.20080000   0.00184799
  0.20080000   0.00147817
  0.20080000   0.00118237
  0.20080000   0.00094578
  0.20080000   0.00075654
  0.20080000   0.00060518
  0.20080000   0.00048412
  0.20080000   0.00038728
  0.20080000   0.00030983
  0.20080000   0.00024788
  0.20080000   0.00019832
  0.20080000   0.00015869
  0.20080000   0.00012698
  0.20080000   0.00010162
  0.20080000   0.00008133
  0.20080000   0.00006510
  0.20080000   0.00005212
  0.20080000   0.00004174
  0.20080000   0.00003343
  0.20080000   0.00002678
  0.20100000   0.00367252
  0.20100000   0.00293953
  0.20100000   0.00235285
  0.20100000   0.00188329
  0.20100000   0.00150745
  0.20100000   0.00120663
  0.20100000   0.00096585
  0.20100000   0.00077313
  0.20100000   0.00061888
  0.20100000   0.00049542
  0.20100000   0.00039660
  0.20100000   0.00031750
  0.20100000   0.00025419
  0.20100000   0.00020351
  0.20100000   0.00016295
  0.20100000   0.00013048
  0.20100000   0.00010449
  0.20100000   0.00008369
  0.20100000   0.00006703
  0.20100000   0.00005370
  0.20100000   0.00004303
  0.20100000   0.00003449
  0.20100000   0.00002765
  0.20120000   0.00373487
  0.20120000   0.00299152
  0.20120000   0.00239613
  0.20120000   0.00191926
  0.20120000   0.00153731
  0.20120000   0.00123138
  0.20120000   0.00098635
  0.20120000   0.00079009
  0.20120000   0.00063289
  0.20120000   0.00050699
  0.20120000   0.00040614
  0.20120000   0.00032536
  0.20120000   0.00026066
  0.20120000   0.00020884
  0.20120000   0.00016733
  0.20120000   0.00013408
  0.20120000   0.00010744
  0.20120000   0.00008611
  0.20120000   0.00006902
  0.20120000   0.00005533
  0.20120000   0.00004437
  0.20120000   0.00003558
  0.20120000   0.00002854
  0.20140000   0.00379829
  0.20140000   0.00304443
  0.20140000   0.00244020
  0.20140000   0.00195592
  0.20140000   0.00156776
  0.20140000   0.00125664
  0.20140000   0.00100728
  0.20140000   0.00080742
  0.20140000   0.00064722
  0.20140000   0.00051882
  0.20140000   0.00041591
  0.20140000   0.00033342
  0.20140000   0.00026730
  0.20140000   0.00021430
  0.20140000   0.00017182
  0.20140000   0.00013777
  0.20140000   0.00011048
  0.20140000   0.00008860
  0.20140000   0.00007107
  0.20140000   0.00005701
  0.20140000   0.00004574
  0.20140000   0.00003671
  0.20140000   0.00002947
  0.20160000   0.00386279
  0.20160000   0.00309828
  0.20160000   0.00248509
  0.20160000   0.00199328
  0.20160000   0.00159881
  0.20160000   0.00128242
  0.20160000   0.00102866
  0.20160000   0.00082512
  0.20160000   0.00066187
  0.20160000   0.00053093
  0.20160000   0.00042591
  0.20160000   0.00034167
  0.20160000   0.00027411
  0.20160000   0.00021991
  0.20160000   0.00017644
  0.20160000   0.00014157
  0.20160000   0.00011361
  0.20160000   0.00009117
  0.20160000   0.00007318
  0.20160000   0.00005874
  0.20160000   0.00004716
  0.20160000   0.00003787
  0.20160000   0.00003042
  0.20180000   0.00392838
  0.20180000   0.00315308
  0.20180000   0.00253080
  0.20180000   0.00203135
  0.20180000   0.00163048
  0.20180000   0.00130874
  0.20180000   0.00105049
  0.20180000   0.00084322
  0.20180000   0.00067686
  0.20180000   0.00054333
  0.20180000   0.00043616
  0.20180000   0.00035013
  0.20180000   0.00028109
  0.20180000   0.00022567
  0.20180000   0.00018118
  0.20180000   0.00014548
  0.20180000   0.00011682
  0.20180000   0.00009381
  0.20180000   0.00007535
  0.20180000   0.00006052
  0.20180000   0.00004862
  0.20180000   0.00003907
  0.20180000   0.00003140
  0.20200000   0.00399509
  0.20200000   0.00320885
  0.20200000   0.00257736
  0.20200000   0.00207016
  0.20200000   0.00166278
  0.20200000   0.00133559
  0.20200000   0.00107279
  0.20200000   0.00086172
  0.20200000   0.00069218
  0.20200000   0.00055602
  0.20200000   0.00044665
  0.20200000   0.00035880
  0.20200000   0.00028824
  0.20200000   0.00023157
  0.20200000   0.00018605
  0.20200000   0.00014949
  0.20200000   0.00012012
  0.20200000   0.00009653
  0.20200000   0.00007758
  0.20200000   0.00006236
  0.20200000   0.00005013
  0.20200000   0.00004031
  0.20200000   0.00003242
  0.20220000   0.00406294
  0.20220000   0.00326561
  0.20220000   0.00262477
  0.20220000   0.00210970
  0.20220000   0.00169572
  0.20220000   0.00136299
  0.20220000   0.00109556
  0.20220000   0.00088062
  0.20220000   0.00070786
  0.20220000   0.00056900
  0.20220000   0.00045739
  0.20220000   0.00036769
  0.20220000   0.00029559
  0.20220000   0.00023763
  0.20220000   0.00019105
  0.20220000   0.00015361
  0.20220000   0.00012352
  0.20220000   0.00009933
  0.20220000   0.00007988
  0.20220000   0.00006425
  0.20220000   0.00005169
  0.20220000   0.00004159
  0.20220000   0.00003347
  0.20240000   0.00413194
  0.20240000   0.00332337
  0.20240000   0.00267305
  0.20240000   0.00215001
  0.20240000   0.00172932
  0.20240000   0.00139096
  0.20240000   0.00111882
  0.20240000   0.00089993
  0.20240000   0.00072388
  0.20240000   0.00058229
  0.20240000   0.00046840
  0.20240000   0.00037679
  0.20240000   0.00030312
  0.20240000   0.00024385
  0.20240000   0.00019619
  0.20240000   0.00015785
  0.20240000   0.00012701
  0.20240000   0.00010221
  0.20240000   0.00008225
  0.20240000   0.00006621
  0.20240000   0.00005330
  0.20240000   0.00004291
  0.20240000   0.00003456
  0.20260000   0.00420211
  0.20260000   0.00338216
  0.20260000   0.00272223
  0.20260000   0.00219108
  0.20260000   0.00176358
  0.20260000   0.00141950
  0.20260000   0.00114257
  0.20260000   0.00091968
  0.20260000   0.00074028
  0.20260000   0.00059588
  0.20260000   0.00047967
  0.20260000   0.00038613
  0.20260000   0.00031084
  0.20260000   0.00025024
  0.20260000   0.00020146
  0.20260000   0.00016220
  0.20260000   0.00013060
  0.20260000   0.00010517
  0.20260000   0.00008470
  0.20260000   0.00006822
  0.20260000   0.00005495
  0.20260000   0.00004427
  0.20260000   0.00003568
  0.20280000   0.00427347
  0.20280000   0.00344199
  0.20280000   0.00277231
  0.20280000   0.00223294
  0.20280000   0.00179852
  0.20280000   0.00144863
  0.20280000   0.00116682
  0.20280000   0.00093985
  0.20280000   0.00075704
  0.20280000   0.00060980
  0.20280000   0.00049121
  0.20280000   0.00039569
  0.20280000   0.00031876
  0.20280000   0.00025679
  0.20280000   0.00020688
  0.20280000   0.00016668
  0.20280000   0.00013430
  0.20280000   0.00010822
  0.20280000   0.00008721
  0.20280000   0.00007029
  0.20280000   0.00005666
  0.20280000   0.00004568
  0.20280000   0.00003683
  0.20300000   0.00434605
  0.20300000   0.00350289
  0.20300000   0.00282332
  0.20300000   0.00227560
  0.20300000   0.00183416
  0.20300000   0.00147836
  0.20300000   0.00119160
  0.20300000   0.00096047
  0.20300000   0.00077418
  0.20300000   0.00062404
  0.20300000   0.00050303
  0.20300000   0.00040549
  0.20300000   0.00032688
  0.20300000   0.00026351
  0.20300000   0.00021244
  0.20300000   0.00017128
  0.20300000   0.00013810
  0.20300000   0.00011136
  0.20300000   0.00008980
  0.20300000   0.00007242
  0.20300000   0.00005842
  0.20300000   0.00004713
  0.20300000   0.00003803
  0.20320000   0.00441986
  0.20320000   0.00356485
  0.20320000   0.00287526
  0.20320000   0.00231908
  0.20320000   0.00187050
  0.20320000   0.00150870
  0.20320000   0.00121689
  0.20320000   0.00098154
  0.20320000   0.00079172
  0.20320000   0.00063862
  0.20320000   0.00051513
  0.20320000   0.00041554
  0.20320000   0.00033521
  0.20320000   0.00027041
  0.20320000   0.00021816
  0.20320000   0.00017600
  0.20320000   0.00014201
  0.20320000   0.00011458
  0.20320000   0.00009247
  0.20320000   0.00007462
  0.20320000   0.00006023
  0.20320000   0.00004862
  0.20320000   0.00003926
  0.20340000   0.00449493
  0.20340000   0.00362792
  0.20340000   0.00292816
  0.20340000   0.00236339
  0.20340000   0.00190756
  0.20340000   0.00153966
  0.20340000   0.00124273
  0.20340000   0.00100307
  0.20340000   0.00080965
  0.20340000   0.00065353
  0.20340000   0.00052753
  0.20340000   0.00042583
  0.20340000   0.00034375
  0.20340000   0.00027750
  0.20340000   0.00022402
  0.20340000   0.00018086
  0.20340000   0.00014603
  0.20340000   0.00011791
  0.20340000   0.00009521
  0.20340000   0.00007689
  0.20340000   0.00006210
  0.20340000   0.00005017
  0.20340000   0.00004053
  0.20360000   0.00457128
  0.20360000   0.00369211
  0.20360000   0.00298204
  0.20360000   0.00240855
  0.20360000   0.00194536
  0.20360000   0.00157126
  0.20360000   0.00126911
  0.20360000   0.00102508
  0.20360000   0.00082799
  0.20360000   0.00066880
  0.20360000   0.00054022
  0.20360000   0.00043638
  0.20360000   0.00035251
  0.20360000   0.00028476
  0.20360000   0.00023005
  0.20360000   0.00018585
  0.20360000   0.00015016
  0.20360000   0.00012133
  0.20360000   0.00009804
  0.20360000   0.00007923
  0.20360000   0.00006404
  0.20360000   0.00005176
  0.20360000   0.00004185
  0.20380000   0.00464892
  0.20380000   0.00375743
  0.20380000   0.00303691
  0.20380000   0.00245457
  0.20380000   0.00198391
  0.20380000   0.00160351
  0.20380000   0.00129606
  0.20380000   0.00104757
  0.20380000   0.00084674
  0.20380000   0.00068442
  0.20380000   0.00055323
  0.20380000   0.00044719
  0.20380000   0.00036149
  0.20380000   0.00029222
  0.20380000   0.00023623
  0.20380000   0.00019098
  0.20380000   0.00015441
  0.20380000   0.00012485
  0.20380000   0.00010095
  0.20380000   0.00008164
  0.20380000   0.00006603
  0.20380000   0.00005341
  0.20380000   0.00004321
  0.20400000   0.00472789
  0.20400000   0.00382391
  0.20400000   0.00309279
  0.20400000   0.00250147
  0.20400000   0.00202322
  0.20400000   0.00163642
  0.20400000   0.00132358
  0.20400000   0.00107056
  0.20400000   0.00086592
  0.20400000   0.00070041
  0.20400000   0.00056654
  0.20400000   0.00045827
  0.20400000   0.00037070
  0.20400000   0.00029987
  0.20400000   0.00024259
  0.20400000   0.00019625
  0.20400000   0.00015878
  0.20400000   0.00012847
  0.20400000   0.00010395
  0.20400000   0.00008412
  0.20400000   0.00006808
  0.20400000   0.00005511
  0.20400000   0.00004461
  0.20420000   0.00480820
  0.20420000   0.00389157
  0.20420000   0.00314970
  0.20420000   0.00254927
  0.20420000   0.00206331
  0.20420000   0.00167001
  0.20420000   0.00135168
  0.20420000   0.00109405
  0.20420000   0.00088553
  0.20420000   0.00071677
  0.20420000   0.00058018
  0.20420000   0.00046962
  0.20420000   0.00038015
  0.20420000   0.00030773
  0.20420000   0.00024911
  0.20420000   0.00020167
  0.20420000   0.00016327
  0.20420000   0.00013220
  0.20420000   0.00010704
  0.20420000   0.00008668
  0.20420000   0.00007020
  0.20420000   0.00005686
  0.20420000   0.00004606
  0.20440000   0.00488987
  0.20440000   0.00396042
  0.20440000   0.00320766
  0.20440000   0.00259798
  0.20440000   0.00210420
  0.20440000   0.00170429
  0.20440000   0.00138039
  0.20440000   0.00111806
  0.20440000   0.00090559
  0.20440000   0.00073351
  0.20440000   0.00059414
  0.20440000   0.00048126
  0.20440000   0.00038984
  0.20440000   0.00031579
  0.20440000   0.00025582
  0.20440000   0.00020724
  0.20440000   0.00016790
  0.20440000   0.00013603
  0.20440000   0.00011022
  0.20440000   0.00008931
  0.20440000   0.00007238
  0.20440000   0.00005866
  0.20440000   0.00004755
  0.20460000   0.00497294
  0.20460000   0.00403050
  0.20460000   0.00326668
  0.20460000   0.00264763
  0.20460000   0.00214590
  0.20460000   0.00173927
  0.20460000   0.00140970
  0.20460000   0.00114259
  0.20460000   0.00092611
  0.20460000   0.00075065
  0.20460000   0.00060844
  0.20460000   0.00049319
  0.20460000   0.00039977
  0.20460000   0.00032406
  0.20460000   0.00026270
  0.20460000   0.00021296
  0.20460000   0.00017265
  0.20460000   0.00013998
  0.20460000   0.00011350
  0.20460000   0.00009203
  0.20460000   0.00007463
  0.20460000   0.00006053
  0.20460000   0.00004910
  0.20480000   0.00505742
  0.20480000   0.00410182
  0.20480000   0.00332680
  0.20480000   0.00269823
  0.20480000   0.00218843
  0.20480000   0.00177497
  0.20480000   0.00143964
  0.20480000   0.00116767
  0.20480000   0.00094709
  0.20480000   0.00076819
  0.20480000   0.00062309
  0.20480000   0.00050541
  0.20480000   0.00040996
  0.20480000   0.00033255
  0.20480000   0.00026977
  0.20480000   0.00021884
  0.20480000   0.00017754
  0.20480000   0.00014404
  0.20480000   0.00011687
  0.20480000   0.00009483
  0.20480000   0.00007696
  0.20480000   0.00006246
  0.20480000   0.00005070
  0.20500000   0.00514333
  0.20500000   0.00417440
  0.20500000   0.00338802
  0.20500000   0.00274979
  0.20500000   0.00223181
  0.20500000   0.00181141
  0.20500000   0.00147021
  0.20500000   0.00119329
  0.20500000   0.00096854
  0.20500000   0.00078613
  0.20500000   0.00063809
  0.20500000   0.00051793
  0.20500000   0.00042041
  0.20500000   0.00034126
  0.20500000   0.00027702
  0.20500000   0.00022489
  0.20500000   0.00018257
  0.20500000   0.00014822
  0.20500000   0.00012034
  0.20500000   0.00009772
  0.20500000   0.00007935
  0.20500000   0.00006444
  0.20500000   0.00005234
  0.20520000   0.00523071
  0.20520000   0.00424827
  0.20520000   0.00345037
  0.20520000   0.00280234
  0.20520000   0.00227604
  0.20520000   0.00184859
  0.20520000   0.00150143
  0.20520000   0.00121948
  0.20520000   0.00099049
  0.20520000   0.00080450
  0.20520000   0.00065345
  0.20520000   0.00053077
  0.20520000   0.00043113
  0.20520000   0.00035021
  0.20520000   0.00028448
  0.20520000   0.00023110
  0.20520000   0.00018774
  0.20520000   0.00015252
  0.20520000   0.00012392
  0.20520000   0.00010069
  0.20520000   0.00008182
  0.20520000   0.00006649
  0.20520000   0.00005404
  0.20540000   0.00531957
  0.20540000   0.00432345
  0.20540000   0.00351387
  0.20540000   0.00285590
  0.20540000   0.00232115
  0.20540000   0.00188654
  0.20540000   0.00153332
  0.20540000   0.00124624
  0.20540000   0.00101293
  0.20540000   0.00082330
  0.20540000   0.00066918
  0.20540000   0.00054393
  0.20540000   0.00044212
  0.20540000   0.00035938
  0.20540000   0.00029213
  0.20540000   0.00023748
  0.20540000   0.00019306
  0.20540000   0.00015695
  0.20540000   0.00012761
  0.20540000   0.00010375
  0.20540000   0.00008437
  0.20540000   0.00006861
  0.20540000   0.00005580
  0.20560000   0.00540994
  0.20560000   0.00439995
  0.20560000   0.00357854
  0.20560000   0.00291048
  0.20560000   0.00236716
  0.20560000   0.00192527
  0.20560000   0.00156588
  0.20560000   0.00127360
  0.20560000   0.00103588
  0.20560000   0.00084254
  0.20560000   0.00068529
  0.20560000   0.00055741
  0.20560000   0.00045339
  0.20560000   0.00036880
  0.20560000   0.00030000
  0.20560000   0.00024404
  0.20560000   0.00019852
  0.20560000   0.00016151
  0.20560000   0.00013140
  0.20560000   0.00010691
  0.20560000   0.00008699
  0.20560000   0.00007079
  0.20560000   0.00005762
  0.20580000   0.00550185
  0.20580000   0.00447782
  0.20580000   0.00364440
  0.20580000   0.00296611
  0.20580000   0.00241408
  0.20580000   0.00196480
  0.20580000   0.00159914
  0.20580000   0.00130155
  0.20580000   0.00105935
  0.20580000   0.00086223
  0.20580000   0.00070179
  0.20580000   0.00057122
  0.20580000   0.00046495
  0.20580000   0.00037846
  0.20580000   0.00030807
  0.20580000   0.00025078
  0.20580000   0.00020415
  0.20580000   0.00016620
  0.20580000   0.00013531
  0.20580000   0.00011017
  0.20580000   0.00008970
  0.20580000   0.00007305
  0.20580000   0.00005949
  0.20600000   0.00559533
  0.20600000   0.00455707
  0.20600000   0.00371148
  0.20600000   0.00302280
  0.20600000   0.00246193
  0.20600000   0.00200514
  0.20600000   0.00163311
  0.20600000   0.00133012
  0.20600000   0.00108335
  0.20600000   0.00088238
  0.20600000   0.00071869
  0.20600000   0.00058538
  0.20600000   0.00047681
  0.20600000   0.00038838
  0.20600000   0.00031636
  0.20600000   0.00025771
  0.20600000   0.00020993
  0.20600000   0.00017102
  0.20600000   0.00013933
  0.20600000   0.00011352
  0.20600000   0.00009250
  0.20600000   0.00007537
  0.20600000   0.00006143
  0.20620000   0.00569040
  0.20620000   0.00463771
  0.20620000   0.00377979
  0.20620000   0.00308058
  0.20620000   0.00251073
  0.20620000   0.00204630
  0.20620000   0.00166780
  0.20620000   0.00135931
  0.20620000   0.00110790
  0.20620000   0.00090300
  0.20620000   0.00073600
  0.20620000   0.00059989
  0.20620000   0.00048897
  0.20620000   0.00039856
  0.20620000   0.00032488
  0.20620000   0.00026483
  0.20620000   0.00021588
  0.20620000   0.00017599
  0.20620000   0.00014348
  0.20620000   0.00011698
  0.20620000   0.00009538
  0.20620000   0.00007777
  0.20620000   0.00006343
  0.20640000   0.00578708
  0.20640000   0.00471979
  0.20640000   0.00384936
  0.20640000   0.00313946
  0.20640000   0.00256050
  0.20640000   0.00208832
  0.20640000   0.00170322
  0.20640000   0.00138915
  0.20640000   0.00113300
  0.20640000   0.00092410
  0.20640000   0.00075372
  0.20640000   0.00061477
  0.20640000   0.00050144
  0.20640000   0.00040901
  0.20640000   0.00033362
  0.20640000   0.00027214
  0.20640000   0.00022200
  0.20640000   0.00018110
  0.20640000   0.00014774
  0.20640000   0.00012054
  0.20640000   0.00009835
  0.20640000   0.00008025
  0.20640000   0.00006549
  0.20660000   0.00588541
  0.20660000   0.00480333
  0.20660000   0.00392021
  0.20660000   0.00319947
  0.20660000   0.00261126
  0.20660000   0.00213120
  0.20660000   0.00173940
  0.20660000   0.00141965
  0.20660000   0.00115868
  0.20660000   0.00094570
  0.20660000   0.00077187
  0.20660000   0.00063001
  0.20660000   0.00051422
  0.20660000   0.00041973
  0.20660000   0.00034260
  0.20660000   0.00027966
  0.20660000   0.00022829
  0.20660000   0.00018636
  0.20660000   0.00015214
  0.20660000   0.00012421
  0.20660000   0.00010141
  0.20660000   0.00008281
  0.20660000   0.00006762
  0.20680000   0.00598541
  0.20680000   0.00488834
  0.20680000   0.00399237
  0.20680000   0.00326063
  0.20680000   0.00266302
  0.20680000   0.00217496
  0.20680000   0.00177635
  0.20680000   0.00145081
  0.20680000   0.00118494
  0.20680000   0.00096780
  0.20680000   0.00079046
  0.20680000   0.00064563
  0.20680000   0.00052734
  0.20680000   0.00043073
  0.20680000   0.00035183
  0.20680000   0.00028739
  0.20680000   0.00023476
  0.20680000   0.00019177
  0.20680000   0.00015667
  0.20680000   0.00012799
  0.20680000   0.00010457
  0.20680000   0.00008545
  0.20680000   0.00006982
  0.20700000   0.00608711
  0.20700000   0.00497486
  0.20700000   0.00406586
  0.20700000   0.00332296
  0.20700000   0.00271582
  0.20700000   0.00221962
  0.20700000   0.00181409
  0.20700000   0.00148266
  0.20700000   0.00121179
  0.20700000   0.00099042
  0.20700000   0.00080950
  0.20700000   0.00066163
  0.20700000   0.00054079
  0.20700000   0.00044202
  0.20700000   0.00036130
  0.20700000   0.00029533
  0.20700000   0.00024141
  0.20700000   0.00019734
  0.20700000   0.00016133
  0.20700000   0.00013189
  0.20700000   0.00010783
  0.20700000   0.00008817
  0.20700000   0.00007210
  0.20720000   0.00619054
  0.20720000   0.00506292
  0.20720000   0.00414070
  0.20720000   0.00338649
  0.20720000   0.00276966
  0.20720000   0.00226520
  0.20720000   0.00185263
  0.20720000   0.00151521
  0.20720000   0.00123926
  0.20720000   0.00101357
  0.20720000   0.00082899
  0.20720000   0.00067804
  0.20720000   0.00055458
  0.20720000   0.00045361
  0.20720000   0.00037103
  0.20720000   0.00030349
  0.20720000   0.00024825
  0.20720000   0.00020308
  0.20720000   0.00016613
  0.20720000   0.00013591
  0.20720000   0.00011119
  0.20720000   0.00009098
  0.20720000   0.00007444
  0.20740000   0.00629574
  0.20740000   0.00515253
  0.20740000   0.00421693
  0.20740000   0.00345122
  0.20740000   0.00282457
  0.20740000   0.00231171
  0.20740000   0.00189198
  0.20740000   0.00154847
  0.20740000   0.00126734
  0.20740000   0.00103726
  0.20740000   0.00084896
  0.20740000   0.00069485
  0.20740000   0.00056872
  0.20740000   0.00046550
  0.20740000   0.00038102
  0.20740000   0.00031188
  0.20740000   0.00025529
  0.20740000   0.00020898
  0.20740000   0.00017107
  0.20740000   0.00014005
  0.20740000   0.00011466
  0.20740000   0.00009388
  0.20740000   0.00007687
  0.20760000   0.00640272
  0.20760000   0.00524373
  0.20760000   0.00429455
  0.20760000   0.00351720
  0.20760000   0.00288057
  0.20760000   0.00235918
  0.20760000   0.00193218
  0.20760000   0.00158247
  0.20760000   0.00129607
  0.20760000   0.00106151
  0.20760000   0.00086941
  0.20760000   0.00071208
  0.20760000   0.00058323
  0.20760000   0.00047770
  0.20760000   0.00039128
  0.20760000   0.00032050
  0.20760000   0.00026253
  0.20760000   0.00021505
  0.20760000   0.00017616
  0.20760000   0.00014432
  0.20760000   0.00011823
  0.20760000   0.00009687
  0.20760000   0.00007937
  0.20780000   0.00651152
  0.20780000   0.00533655
  0.20780000   0.00437361
  0.20780000   0.00358444
  0.20780000   0.00293768
  0.20780000   0.00240763
  0.20780000   0.00197323
  0.20780000   0.00161721
  0.20780000   0.00132544
  0.20780000   0.00108632
  0.20780000   0.00089035
  0.20780000   0.00072974
  0.20780000   0.00059811
  0.20780000   0.00049023
  0.20780000   0.00040182
  0.20780000   0.00032935
  0.20780000   0.00026997
  0.20780000   0.00022130
  0.20780000   0.00018141
  0.20780000   0.00014871
  0.20780000   0.00012192
  0.20780000   0.00009996
  0.20780000   0.00008196
  0.20800000   0.00662218
  0.20800000   0.00543102
  0.20800000   0.00445413
  0.20800000   0.00365297
  0.20800000   0.00299593
  0.20800000   0.00245708
  0.20800000   0.00201515
  0.20800000   0.00165272
  0.20800000   0.00135549
  0.20800000   0.00111172
  0.20800000   0.00091179
  0.20800000   0.00074783
  0.20800000   0.00061336
  0.20800000   0.00050308
  0.20800000   0.00041264
  0.20800000   0.00033846
  0.20800000   0.00027762
  0.20800000   0.00022773
  0.20800000   0.00018681
  0.20800000   0.00015325
  0.20800000   0.00012572
  0.20800000   0.00010314
  0.20800000   0.00008463
  0.20820000   0.00673471
  0.20820000   0.00552716
  0.20820000   0.00453613
  0.20820000   0.00372281
  0.20820000   0.00305533
  0.20820000   0.00250754
  0.20820000   0.00205797
  0.20820000   0.00168901
  0.20820000   0.00138621
  0.20820000   0.00113771
  0.20820000   0.00093376
  0.20820000   0.00076638
  0.20820000   0.00062901
  0.20820000   0.00051627
  0.20820000   0.00042375
  0.20820000   0.00034781
  0.20820000   0.00028549
  0.20820000   0.00023435
  0.20820000   0.00019237
  0.20820000   0.00015792
  0.20820000   0.00012964
  0.20820000   0.00010643
  0.20820000   0.00008739
  0.20840000   0.00684917
  0.20840000   0.00562500
  0.20840000   0.00461964
  0.20840000   0.00379399
  0.20840000   0.00311591
  0.20840000   0.00255904
  0.20840000   0.00210169
  0.20840000   0.00172610
  0.20840000   0.00141763
  0.20840000   0.00116430
  0.20840000   0.00095625
  0.20840000   0.00078539
  0.20840000   0.00064506
  0.20840000   0.00052981
  0.20840000   0.00043516
  0.20840000   0.00035743
  0.20840000   0.00029359
  0.20840000   0.00024116
  0.20840000   0.00019810
  0.20840000   0.00016273
  0.20840000   0.00013368
  0.20840000   0.00010983
  0.20840000   0.00009023
  0.20860000   0.00696557
  0.20860000   0.00572458
  0.20860000   0.00470470
  0.20860000   0.00386653
  0.20860000   0.00317770
  0.20860000   0.00261159
  0.20860000   0.00214635
  0.20860000   0.00176400
  0.20860000   0.00144977
  0.20860000   0.00119152
  0.20860000   0.00097929
  0.20860000   0.00080486
  0.20860000   0.00066152
  0.20860000   0.00054370
  0.20860000   0.00044688
  0.20860000   0.00036731
  0.20860000   0.00030191
  0.20860000   0.00024817
  0.20860000   0.00020399
  0.20860000   0.00016769
  0.20860000   0.00013785
  0.20860000   0.00011333
  0.20860000   0.00009318
  0.20880000   0.00708395
  0.20880000   0.00582592
  0.20880000   0.00479131
  0.20880000   0.00394046
  0.20880000   0.00324071
  0.20880000   0.00266523
  0.20880000   0.00219196
  0.20880000   0.00180273
  0.20880000   0.00148263
  0.20880000   0.00121938
  0.20880000   0.00100288
  0.20880000   0.00082483
  0.20880000   0.00067839
  0.20880000   0.00055796
  0.20880000   0.00045892
  0.20880000   0.00037746
  0.20880000   0.00031047
  0.20880000   0.00025538
  0.20880000   0.00021007
  0.20880000   0.00017280
  0.20880000   0.00014215
  0.20880000   0.00011695
  0.20880000   0.00009621
  0.20900000   0.00720434
  0.20900000   0.00592906
  0.20900000   0.00487953
  0.20900000   0.00401580
  0.20900000   0.00330497
  0.20900000   0.00271997
  0.20900000   0.00223854
  0.20900000   0.00184232
  0.20900000   0.00151625
  0.20900000   0.00124789
  0.20900000   0.00102704
  0.20900000   0.00084528
  0.20900000   0.00069570
  0.20900000   0.00057260
  0.20900000   0.00047128
  0.20900000   0.00038790
  0.20900000   0.00031928
  0.20900000   0.00026280
  0.20900000   0.00021632
  0.20900000   0.00017807
  0.20900000   0.00014659
  0.20900000   0.00012068
  0.20900000   0.00009935
  0.20920000   0.00732678
  0.20920000   0.00603402
  0.20920000   0.00496937
  0.20920000   0.00409259
  0.20920000   0.00337051
  0.20920000   0.00277584
  0.20920000   0.00228610
  0.20920000   0.00188278
  0.20920000   0.00155062
  0.20920000   0.00127707
  0.20920000   0.00105179
  0.20920000   0.00086625
  0.20920000   0.00071345
  0.20920000   0.00058761
  0.20920000   0.00048398
  0.20920000   0.00039863
  0.20920000   0.00032833
  0.20920000   0.00027044
  0.20920000   0.00022277
  0.20920000   0.00018350
  0.20920000   0.00015116
  0.20920000   0.00012453
  0.20920000   0.00010259
  0.20940000   0.00745131
  0.20940000   0.00614085
  0.20940000   0.00506087
  0.20940000   0.00417084
  0.20940000   0.00343735
  0.20940000   0.00283286
  0.20940000   0.00233468
  0.20940000   0.00192413
  0.20940000   0.00158578
  0.20940000   0.00130693
  0.20940000   0.00107713
  0.20940000   0.00088774
  0.20940000   0.00073166
  0.20940000   0.00060303
  0.20940000   0.00049702
  0.20940000   0.00040965
  0.20940000   0.00033765
  0.20940000   0.00027831
  0.20940000   0.00022940
  0.20940000   0.00018909
  0.20940000   0.00015588
  0.20940000   0.00012850
  0.20940000   0.00010594
  0.20960000   0.00757796
  0.20960000   0.00624957
  0.20960000   0.00515406
  0.20960000   0.00425060
  0.20960000   0.00350551
  0.20960000   0.00289105
  0.20960000   0.00238430
  0.20960000   0.00196638
  0.20960000   0.00162173
  0.20960000   0.00133749
  0.20960000   0.00110308
  0.20960000   0.00090976
  0.20960000   0.00075033
  0.20960000   0.00061884
  0.20960000   0.00051041
  0.20960000   0.00042098
  0.20960000   0.00034722
  0.20960000   0.00028640
  0.20960000   0.00023623
  0.20960000   0.00019486
  0.20960000   0.00016074
  0.20960000   0.00013260
  0.20960000   0.00010939
  0.20980000   0.00770676
  0.20980000   0.00636022
  0.20980000   0.00524896
  0.20980000   0.00433188
  0.20980000   0.00357503
  0.20980000   0.00295043
  0.20980000   0.00243497
  0.20980000   0.00200957
  0.20980000   0.00165850
  0.20980000   0.00136877
  0.20980000   0.00112966
  0.20980000   0.00093233
  0.20980000   0.00076947
  0.20980000   0.00063507
  0.20980000   0.00052416
  0.20980000   0.00043262
  0.20980000   0.00035707
  0.20980000   0.00029472
  0.20980000   0.00024327
  0.20980000   0.00020080
  0.20980000   0.00016576
  0.20980000   0.00013683
  0.20980000   0.00011296
  0.21000000   0.00783775
  0.21000000   0.00647283
  0.21000000   0.00534562
  0.21000000   0.00441471
  0.21000000   0.00364593
  0.21000000   0.00301104
  0.21000000   0.00248672
  0.21000000   0.00205370
  0.21000000   0.00169610
  0.21000000   0.00140077
  0.21000000   0.00115688
  0.21000000   0.00095546
  0.21000000   0.00078911
  0.21000000   0.00065173
  0.21000000   0.00053828
  0.21000000   0.00044458
  0.21000000   0.00036720
  0.21000000   0.00030329
  0.21000000   0.00025052
  0.21000000   0.00020693
  0.21000000   0.00017093
  0.21000000   0.00014120
  0.21000000   0.00011664
  0.21020000   0.00797097
  0.21020000   0.00658743
  0.21020000   0.00544405
  0.21020000   0.00449914
  0.21020000   0.00371824
  0.21020000   0.00307290
  0.21020000   0.00253957
  0.21020000   0.00209881
  0.21020000   0.00173456
  0.21020000   0.00143353
  0.21020000   0.00118475
  0.21020000   0.00097916
  0.21020000   0.00080925
  0.21020000   0.00066883
  0.21020000   0.00055278
  0.21020000   0.00045688
  0.21020000   0.00037762
  0.21020000   0.00031211
  0.21020000   0.00025798
  0.21020000   0.00021324
  0.21020000   0.00017626
  0.21020000   0.00014570
  0.21020000   0.00012045
  0.21040000   0.00810646
  0.21040000   0.00670407
  0.21040000   0.00554430
  0.21040000   0.00458518
  0.21040000   0.00379199
  0.21040000   0.00313602
  0.21040000   0.00259354
  0.21040000   0.00214491
  0.21040000   0.00177389
  0.21040000   0.00146706
  0.21040000   0.00121330
  0.21040000   0.00100345
  0.21040000   0.00082990
  0.21040000   0.00068637
  0.21040000   0.00056768
  0.21040000   0.00046951
  0.21040000   0.00038833
  0.21040000   0.00032119
  0.21040000   0.00026566
  0.21040000   0.00021974
  0.21040000   0.00018176
  0.21040000   0.00015036
  0.21040000   0.00012438
  0.21060000   0.00824426
  0.21060000   0.00682277
  0.21060000   0.00564640
  0.21060000   0.00467286
  0.21060000   0.00386720
  0.21060000   0.00320045
  0.21060000   0.00264866
  0.21060000   0.00219202
  0.21060000   0.00181411
  0.21060000   0.00150137
  0.21060000   0.00124254
  0.21060000   0.00102835
  0.21060000   0.00085108
  0.21060000   0.00070438
  0.21060000   0.00058297
  0.21060000   0.00048250
  0.21060000   0.00039935
  0.21060000   0.00033053
  0.21060000   0.00027358
  0.21060000   0.00022645
  0.21060000   0.00018744
  0.21060000   0.00015516
  0.21060000   0.00012844
  0.21080000   0.00838440
  0.21080000   0.00694358
  0.21080000   0.00575038
  0.21080000   0.00476223
  0.21080000   0.00394390
  0.21080000   0.00326620
  0.21080000   0.00270496
  0.21080000   0.00224017
  0.21080000   0.00185525
  0.21080000   0.00153648
  0.21080000   0.00127249
  0.21080000   0.00105386
  0.21080000   0.00087280
  0.21080000   0.00072286
  0.21080000   0.00059868
  0.21080000   0.00049584
  0.21080000   0.00041068
  0.21080000   0.00034014
  0.21080000   0.00028173
  0.21080000   0.00023335
  0.21080000   0.00019329
  0.21080000   0.00016011
  0.21080000   0.00013263
  0.21100000   0.00852692
  0.21100000   0.00706653
  0.21100000   0.00585628
  0.21100000   0.00485331
  0.21100000   0.00402212
  0.21100000   0.00333330
  0.21100000   0.00276245
  0.21100000   0.00228937
  0.21100000   0.00189732
  0.21100000   0.00157241
  0.21100000   0.00130315
  0.21100000   0.00108001
  0.21100000   0.00089508
  0.21100000   0.00074183
  0.21100000   0.00061482
  0.21100000   0.00050956
  0.21100000   0.00042233
  0.21100000   0.00035004
  0.21100000   0.00029013
  0.21100000   0.00024047
  0.21100000   0.00019932
  0.21100000   0.00016522
  0.21100000   0.00013696
  0.21120000   0.00867187
  0.21120000   0.00719166
  0.21120000   0.00596413
  0.21120000   0.00494613
  0.21120000   0.00410190
  0.21120000   0.00340178
  0.21120000   0.00282117
  0.21120000   0.00233966
  0.21120000   0.00194035
  0.21120000   0.00160919
  0.21120000   0.00133456
  0.21120000   0.00110681
  0.21120000   0.00091793
  0.21120000   0.00076129
  0.21120000   0.00063139
  0.21120000   0.00052366
  0.21120000   0.00043431
  0.21120000   0.00036022
  0.21120000   0.00029877
  0.21120000   0.00024781
  0.21120000   0.00020555
  0.21120000   0.00017050
  0.21120000   0.00014143
  0.21140000   0.00881929
  0.21140000   0.00731901
  0.21140000   0.00607396
  0.21140000   0.00504073
  0.21140000   0.00418326
  0.21140000   0.00347167
  0.21140000   0.00288113
  0.21140000   0.00239106
  0.21140000   0.00198435
  0.21140000   0.00164683
  0.21140000   0.00136672
  0.21140000   0.00113427
  0.21140000   0.00094136
  0.21140000   0.00078126
  0.21140000   0.00064840
  0.21140000   0.00053814
  0.21140000   0.00044664
  0.21140000   0.00037070
  0.21140000   0.00030767
  0.21140000   0.00025537
  0.21140000   0.00021197
  0.21140000   0.00017594
  0.21140000   0.00014605
  0.21160000   0.00896921
  0.21160000   0.00744862
  0.21160000   0.00618583
  0.21160000   0.00513714
  0.21160000   0.00426624
  0.21160000   0.00354300
  0.21160000   0.00294237
  0.21160000   0.00244358
  0.21160000   0.00202935
  0.21160000   0.00168535
  0.21160000   0.00139966
  0.21160000   0.00116242
  0.21160000   0.00096539
  0.21160000   0.00080176
  0.21160000   0.00066588
  0.21160000   0.00055303
  0.21160000   0.00045931
  0.21160000   0.00038148
  0.21160000   0.00031684
  0.21160000   0.00026316
  0.21160000   0.00021858
  0.21160000   0.00018156
  0.21160000   0.00015081
  0.21180000   0.00912169
  0.21180000   0.00758052
  0.21180000   0.00629975
  0.21180000   0.00523539
  0.21180000   0.00435087
  0.21180000   0.00361579
  0.21180000   0.00300492
  0.21180000   0.00249726
  0.21180000   0.00207537
  0.21180000   0.00172477
  0.21180000   0.00143340
  0.21180000   0.00119126
  0.21180000   0.00099003
  0.21180000   0.00082280
  0.21180000   0.00068382
  0.21180000   0.00056833
  0.21180000   0.00047235
  0.21180000   0.00039258
  0.21180000   0.00032629
  0.21180000   0.00027120
  0.21180000   0.00022541
  0.21180000   0.00018736
  0.21180000   0.00015574
  0.21200000   0.00927676
  0.21200000   0.00771476
  0.21200000   0.00641578
  0.21200000   0.00533553
  0.21200000   0.00443717
  0.21200000   0.00369009
  0.21200000   0.00306880
  0.21200000   0.00255212
  0.21200000   0.00212244
  0.21200000   0.00176511
  0.21200000   0.00146795
  0.21200000   0.00122082
  0.21200000   0.00101531
  0.21200000   0.00084439
  0.21200000   0.00070226
  0.21200000   0.00058405
  0.21200000   0.00048575
  0.21200000   0.00040400
  0.21200000   0.00033601
  0.21200000   0.00027947
  0.21200000   0.00023245
  0.21200000   0.00019335
  0.21200000   0.00016082
  0.21220000   0.00943448
  0.21220000   0.00785138
  0.21220000   0.00653395
  0.21220000   0.00543758
  0.21220000   0.00452519
  0.21220000   0.00376591
  0.21220000   0.00313403
  0.21220000   0.00260819
  0.21220000   0.00217058
  0.21220000   0.00180640
  0.21220000   0.00150333
  0.21220000   0.00125112
  0.21220000   0.00104123
  0.21220000   0.00086655
  0.21220000   0.00072119
  0.21220000   0.00060021
  0.21220000   0.00049954
  0.21220000   0.00041575
  0.21220000   0.00034603
  0.21220000   0.00028800
  0.21220000   0.00023971
  0.21220000   0.00019952
  0.21220000   0.00016608
  0.21240000   0.00959487
  0.21240000   0.00799043
  0.21240000   0.00665429
  0.21240000   0.00554159
  0.21240000   0.00461496
  0.21240000   0.00384329
  0.21240000   0.00320066
  0.21240000   0.00266549
  0.21240000   0.00221981
  0.21240000   0.00184866
  0.21240000   0.00153957
  0.21240000   0.00128217
  0.21240000   0.00106781
  0.21240000   0.00088929
  0.21240000   0.00074063
  0.21240000   0.00061682
  0.21240000   0.00051371
  0.21240000   0.00042785
  0.21240000   0.00035634
  0.21240000   0.00029679
  0.21240000   0.00024720
  0.21240000   0.00020590
  0.21240000   0.00017150
  0.21260000   0.00975800
  0.21260000   0.00813194
  0.21260000   0.00677685
  0.21260000   0.00564759
  0.21260000   0.00470651
  0.21260000   0.00392226
  0.21260000   0.00326870
  0.21260000   0.00272405
  0.21260000   0.00227016
  0.21260000   0.00189190
  0.21260000   0.00157668
  0.21260000   0.00131399
  0.21260000   0.00109507
  0.21260000   0.00091263
  0.21260000   0.00076059
  0.21260000   0.00063389
  0.21260000   0.00052830
  0.21260000   0.00044030
  0.21260000   0.00036696
  0.21260000   0.00030585
  0.21260000   0.00025492
  0.21260000   0.00021247
  0.21260000   0.00017710
  0.21280000   0.00992390
  0.21280000   0.00827595
  0.21280000   0.00690168
  0.21280000   0.00575562
  0.21280000   0.00479988
  0.21280000   0.00400286
  0.21280000   0.00333819
  0.21280000   0.00278390
  0.21280000   0.00232165
  0.21280000   0.00193616
  0.21280000   0.00161469
  0.21280000   0.00134660
  0.21280000   0.00112303
  0.21280000   0.00093658
  0.21280000   0.00078109
  0.21280000   0.00065143
  0.21280000   0.00054329
  0.21280000   0.00045311
  0.21280000   0.00037790
  0.21280000   0.00031519
  0.21280000   0.00026288
  0.21280000   0.00021926
  0.21280000   0.00018288
  0.21300000   0.01009262
  0.21300000   0.00842252
  0.21300000   0.00702880
  0.21300000   0.00586572
  0.21300000   0.00489511
  0.21300000   0.00408511
  0.21300000   0.00340916
  0.21300000   0.00284506
  0.21300000   0.00237431
  0.21300000   0.00198146
  0.21300000   0.00165361
  0.21300000   0.00138002
  0.21300000   0.00115170
  0.21300000   0.00096116
  0.21300000   0.00080215
  0.21300000   0.00066945
  0.21300000   0.00055871
  0.21300000   0.00046630
  0.21300000   0.00038917
  0.21300000   0.00032481
  0.21300000   0.00027109
  0.21300000   0.00022627
  0.21300000   0.00018886
  0.21320000   0.01026422
  0.21320000   0.00857169
  0.21320000   0.00715827
  0.21320000   0.00597793
  0.21320000   0.00499222
  0.21320000   0.00416906
  0.21320000   0.00348164
  0.21320000   0.00290757
  0.21320000   0.00242817
  0.21320000   0.00202782
  0.21320000   0.00169348
  0.21320000   0.00141427
  0.21320000   0.00118111
  0.21320000   0.00098639
  0.21320000   0.00082378
  0.21320000   0.00068798
  0.21320000   0.00057457
  0.21320000   0.00047987
  0.21320000   0.00040077
  0.21320000   0.00033472
  0.21320000   0.00027956
  0.21320000   0.00023350
  0.21320000   0.00019503
  0.21340000   0.01043874
  0.21340000   0.00872351
  0.21340000   0.00729013
  0.21340000   0.00609228
  0.21340000   0.00509126
  0.21340000   0.00425473
  0.21340000   0.00355566
  0.21340000   0.00297146
  0.21340000   0.00248325
  0.21340000   0.00207526
  0.21340000   0.00173431
  0.21340000   0.00144938
  0.21340000   0.00121127
  0.21340000   0.00101228
  0.21340000   0.00084599
  0.21340000   0.00070702
  0.21340000   0.00059088
  0.21340000   0.00049383
  0.21340000   0.00041272
  0.21340000   0.00034494
  0.21340000   0.00028830
  0.21340000   0.00024096
  0.21340000   0.00020140
  0.21360000   0.01061622
  0.21360000   0.00887801
  0.21360000   0.00742441
  0.21360000   0.00620883
  0.21360000   0.00519228
  0.21360000   0.00434217
  0.21360000   0.00363126
  0.21360000   0.00303675
  0.21360000   0.00253958
  0.21360000   0.00212381
  0.21360000   0.00177612
  0.21360000   0.00148535
  0.21360000   0.00124219
  0.21360000   0.00103885
  0.21360000   0.00086880
  0.21360000   0.00072659
  0.21360000   0.00060766
  0.21360000   0.00050820
  0.21360000   0.00042503
  0.21360000   0.00035547
  0.21360000   0.00029731
  0.21360000   0.00024866
  0.21360000   0.00020798
  0.21380000   0.01079673
  0.21380000   0.00903525
  0.21380000   0.00756118
  0.21380000   0.00632760
  0.21380000   0.00529529
  0.21380000   0.00443141
  0.21380000   0.00370847
  0.21380000   0.00310347
  0.21380000   0.00259719
  0.21380000   0.00217350
  0.21380000   0.00181894
  0.21380000   0.00152222
  0.21380000   0.00127391
  0.21380000   0.00106612
  0.21380000   0.00089222
  0.21380000   0.00074670
  0.21380000   0.00062491
  0.21380000   0.00052299
  0.21380000   0.00043770
  0.21380000   0.00036633
  0.21380000   0.00030660
  0.21380000   0.00025661
  0.21380000   0.00021477
  0.21400000   0.01098031
  0.21400000   0.00919529
  0.21400000   0.00770046
  0.21400000   0.00644865
  0.21400000   0.00540035
  0.21400000   0.00452248
  0.21400000   0.00378732
  0.21400000   0.00317167
  0.21400000   0.00265611
  0.21400000   0.00222436
  0.21400000   0.00186279
  0.21400000   0.00156001
  0.21400000   0.00130645
  0.21400000   0.00109410
  0.21400000   0.00091628
  0.21400000   0.00076736
  0.21400000   0.00064265
  0.21400000   0.00053822
  0.21400000   0.00045076
  0.21400000   0.00037751
  0.21400000   0.00031618
  0.21400000   0.00026481
  0.21400000   0.00022179
  0.21420000   0.01116701
  0.21420000   0.00935816
  0.21420000   0.00784231
  0.21420000   0.00657202
  0.21420000   0.00550750
  0.21420000   0.00461542
  0.21420000   0.00386784
  0.21420000   0.00324136
  0.21420000   0.00271636
  0.21420000   0.00227640
  0.21420000   0.00190771
  0.21420000   0.00159873
  0.21420000   0.00133981
  0.21420000   0.00112282
  0.21420000   0.00094099
  0.21420000   0.00078860
  0.21420000   0.00066090
  0.21420000   0.00055388
  0.21420000   0.00046420
  0.21420000   0.00038904
  0.21420000   0.00032606
  0.21420000   0.00027327
  0.21420000   0.00022904
  0.21440000   0.01135690
  0.21440000   0.00952391
  0.21440000   0.00798678
  0.21440000   0.00669775
  0.21440000   0.00561678
  0.21440000   0.00471028
  0.21440000   0.00395009
  0.21440000   0.00331259
  0.21440000   0.00277799
  0.21440000   0.00232967
  0.21440000   0.00195370
  0.21440000   0.00163842
  0.21440000   0.00137402
  0.21440000   0.00115230
  0.21440000   0.00096636
  0.21440000   0.00081043
  0.21440000   0.00067966
  0.21440000   0.00057000
  0.21440000   0.00047804
  0.21440000   0.00040092
  0.21440000   0.00033625
  0.21440000   0.00028201
  0.21440000   0.00023653
  0.21460000   0.01155001
  0.21460000   0.00969261
  0.21460000   0.00813392
  0.21460000   0.00682589
  0.21460000   0.00572823
  0.21460000   0.00480709
  0.21460000   0.00403408
  0.21460000   0.00338538
  0.21460000   0.00284101
  0.21460000   0.00238418
  0.21460000   0.00200081
  0.21460000   0.00167909
  0.21460000   0.00140911
  0.21460000   0.00118255
  0.21460000   0.00099242
  0.21460000   0.00083286
  0.21460000   0.00069896
  0.21460000   0.00058660
  0.21460000   0.00049230
  0.21460000   0.00041316
  0.21460000   0.00034676
  0.21460000   0.00029102
  0.21460000   0.00024426
  0.21480000   0.01174641
  0.21480000   0.00986429
  0.21480000   0.00828376
  0.21480000   0.00695649
  0.21480000   0.00584189
  0.21480000   0.00490589
  0.21480000   0.00411986
  0.21480000   0.00345978
  0.21480000   0.00290546
  0.21480000   0.00243997
  0.21480000   0.00204906
  0.21480000   0.00172078
  0.21480000   0.00144510
  0.21480000   0.00121359
  0.21480000   0.00101918
  0.21480000   0.00085592
  0.21480000   0.00071881
  0.21480000   0.00060367
  0.21480000   0.00050698
  0.21480000   0.00042578
  0.21480000   0.00035759
  0.21480000   0.00030033
  0.21480000   0.00025224
  0.21500000   0.01194615
  0.21500000   0.01003902
  0.21500000   0.00843637
  0.21500000   0.00708958
  0.21500000   0.00595781
  0.21500000   0.00500672
  0.21500000   0.00420747
  0.21500000   0.00353581
  0.21500000   0.00297138
  0.21500000   0.00249706
  0.21500000   0.00209846
  0.21500000   0.00176350
  0.21500000   0.00148201
  0.21500000   0.00124545
  0.21500000   0.00104666
  0.21500000   0.00087961
  0.21500000   0.00073922
  0.21500000   0.00062125
  0.21500000   0.00052210
  0.21500000   0.00043879
  0.21500000   0.00036877
  0.21500000   0.00030993
  0.21500000   0.00026048
  0.21520000   0.01214929
  0.21520000   0.01021685
  0.21520000   0.00859179
  0.21520000   0.00722523
  0.21520000   0.00607603
  0.21520000   0.00510962
  0.21520000   0.00429694
  0.21520000   0.00361352
  0.21520000   0.00303880
  0.21520000   0.00255550
  0.21520000   0.00214907
  0.21520000   0.00180728
  0.21520000   0.00151986
  0.21520000   0.00127815
  0.21520000   0.00107489
  0.21520000   0.00090396
  0.21520000   0.00076021
  0.21520000   0.00063933
  0.21520000   0.00053768
  0.21520000   0.00045219
  0.21520000   0.00038030
  0.21520000   0.00031984
  0.21520000   0.00026900
  0.21540000   0.01235589
  0.21540000   0.01039783
  0.21540000   0.00875008
  0.21540000   0.00736347
  0.21540000   0.00619660
  0.21540000   0.00521465
  0.21540000   0.00438831
  0.21540000   0.00369293
  0.21540000   0.00310775
  0.21540000   0.00261530
  0.21540000   0.00220089
  0.21540000   0.00185215
  0.21540000   0.00155868
  0.21540000   0.00131171
  0.21540000   0.00110388
  0.21540000   0.00092898
  0.21540000   0.00078180
  0.21540000   0.00065795
  0.21540000   0.00055371
  0.21540000   0.00046600
  0.21540000   0.00039218
  0.21540000   0.00033007
  0.21540000   0.00027779
  0.21560000   0.01256601
  0.21560000   0.01058202
  0.21560000   0.00891129
  0.21560000   0.00750435
  0.21560000   0.00631956
  0.21560000   0.00532183
  0.21560000   0.00448163
  0.21560000   0.00377409
  0.21560000   0.00317826
  0.21560000   0.00267650
  0.21560000   0.00225396
  0.21560000   0.00189814
  0.21560000   0.00159849
  0.21560000   0.00134615
  0.21560000   0.00113365
  0.21560000   0.00095470
  0.21560000   0.00080401
  0.21560000   0.00067710
  0.21560000   0.00057023
  0.21560000   0.00048023
  0.21560000   0.00040444
  0.21560000   0.00034062
  0.21560000   0.00028687
  0.21580000   0.01277970
  0.21580000   0.01076948
  0.21580000   0.00907547
  0.21580000   0.00764794
  0.21580000   0.00644497
  0.21580000   0.00543122
  0.21580000   0.00457694
  0.21580000   0.00385704
  0.21580000   0.00325037
  0.21580000   0.00273914
  0.21580000   0.00230832
  0.21580000   0.00194526
  0.21580000   0.00163932
  0.21580000   0.00138150
  0.21580000   0.00116423
  0.21580000   0.00098113
  0.21580000   0.00082684
  0.21580000   0.00069682
  0.21580000   0.00058724
  0.21580000   0.00049490
  0.21580000   0.00041709
  0.21580000   0.00035151
  0.21580000   0.00029625
  0.21600000   0.01299703
  0.21600000   0.01096025
  0.21600000   0.00924268
  0.21600000   0.00779428
  0.21600000   0.00657286
  0.21600000   0.00554286
  0.21600000   0.00467427
  0.21600000   0.00394181
  0.21600000   0.00332413
  0.21600000   0.00280324
  0.21600000   0.00236399
  0.21600000   0.00199356
  0.21600000   0.00168119
  0.21600000   0.00141777
  0.21600000   0.00119563
  0.21600000   0.00100830
  0.21600000   0.00085032
  0.21600000   0.00071710
  0.21600000   0.00060476
  0.21600000   0.00051002
  0.21600000   0.00043013
  0.21600000   0.00036275
  0.21600000   0.00030594
  0.21620000   0.01321806
  0.21620000   0.01115441
  0.21620000   0.00941297
  0.21620000   0.00794341
  0.21620000   0.00670330
  0.21620000   0.00565680
  0.21620000   0.00477368
  0.21620000   0.00402844
  0.21620000   0.00339955
  0.21620000   0.00286885
  0.21620000   0.00242100
  0.21620000   0.00204306
  0.21620000   0.00172414
  0.21620000   0.00145500
  0.21620000   0.00122788
  0.21620000   0.00103622
  0.21620000   0.00087448
  0.21620000   0.00073798
  0.21620000   0.00062280
  0.21620000   0.00052560
  0.21620000   0.00044358
  0.21620000   0.00037435
  0.21620000   0.00031594
  0.21640000   0.01344285
  0.21640000   0.01135202
  0.21640000   0.00958640
  0.21640000   0.00809541
  0.21640000   0.00683633
  0.21640000   0.00577308
  0.21640000   0.00487521
  0.21640000   0.00411698
  0.21640000   0.00347669
  0.21640000   0.00293599
  0.21640000   0.00247938
  0.21640000   0.00209380
  0.21640000   0.00176818
  0.21640000   0.00149320
  0.21640000   0.00126100
  0.21640000   0.00106491
  0.21640000   0.00089931
  0.21640000   0.00075947
  0.21640000   0.00064138
  0.21640000   0.00054166
  0.21640000   0.00045744
  0.21640000   0.00038633
  0.21640000   0.00032627
  0.21660000   0.01367146
  0.21660000   0.01155312
  0.21660000   0.00976303
  0.21660000   0.00825031
  0.21660000   0.00697200
  0.21660000   0.00589175
  0.21660000   0.00497889
  0.21660000   0.00420747
  0.21660000   0.00355559
  0.21660000   0.00300470
  0.21660000   0.00253918
  0.21660000   0.00214579
  0.21660000   0.00181335
  0.21660000   0.00153242
  0.21660000   0.00129501
  0.21660000   0.00109439
  0.21660000   0.00092486
  0.21660000   0.00078159
  0.21660000   0.00066052
  0.21660000   0.00055821
  0.21660000   0.00047175
  0.21660000   0.00039868
  0.21660000   0.00033694
  0.21680000   0.01390397
  0.21680000   0.01175779
  0.21680000   0.00994292
  0.21680000   0.00840819
  0.21680000   0.00711036
  0.21680000   0.00601287
  0.21680000   0.00508478
  0.21680000   0.00429995
  0.21680000   0.00363627
  0.21680000   0.00307503
  0.21680000   0.00260042
  0.21680000   0.00219907
  0.21680000   0.00185967
  0.21680000   0.00157266
  0.21680000   0.00132994
  0.21680000   0.00112470
  0.21680000   0.00095113
  0.21680000   0.00080435
  0.21680000   0.00068023
  0.21680000   0.00057526
  0.21680000   0.00048650
  0.21680000   0.00041144
  0.21680000   0.00034796
  0.21700000   0.01414043
  0.21700000   0.01196609
  0.21700000   0.01012612
  0.21700000   0.00856908
  0.21700000   0.00725147
  0.21700000   0.00613647
  0.21700000   0.00519293
  0.21700000   0.00439447
  0.21700000   0.00371879
  0.21700000   0.00314700
  0.21700000   0.00266314
  0.21700000   0.00225368
  0.21700000   0.00190718
  0.21700000   0.00161396
  0.21700000   0.00136582
  0.21700000   0.00115584
  0.21700000   0.00097815
  0.21700000   0.00082777
  0.21700000   0.00070052
  0.21700000   0.00059284
  0.21700000   0.00050171
  0.21700000   0.00042460
  0.21700000   0.00035934
  0.21720000   0.01438092
  0.21720000   0.01217809
  0.21720000   0.01031270
  0.21720000   0.00873306
  0.21720000   0.00739539
  0.21720000   0.00626262
  0.21720000   0.00530337
  0.21720000   0.00449106
  0.21720000   0.00380318
  0.21720000   0.00322066
  0.21720000   0.00272737
  0.21720000   0.00230964
  0.21720000   0.00195590
  0.21720000   0.00165634
  0.21720000   0.00140267
  0.21720000   0.00118785
  0.21720000   0.00100593
  0.21720000   0.00085188
  0.21720000   0.00072143
  0.21720000   0.00061095
  0.21720000   0.00051740
  0.21720000   0.00043818
  0.21720000   0.00037109
  0.21740000   0.01462550
  0.21740000   0.01239384
  0.21740000   0.01050272
  0.21740000   0.00890017
  0.21740000   0.00754216
  0.21740000   0.00639137
  0.21740000   0.00541617
  0.21740000   0.00458978
  0.21740000   0.00388949
  0.21740000   0.00329605
  0.21740000   0.00279316
  0.21740000   0.00236700
  0.21740000   0.00200587
  0.21740000   0.00169984
  0.21740000   0.00144050
  0.21740000   0.00122074
  0.21740000   0.00103451
  0.21740000   0.00087669
  0.21740000   0.00074295
  0.21740000   0.00062962
  0.21740000   0.00053358
  0.21740000   0.00045219
  0.21740000   0.00038322
  0.21760000   0.01487424
  0.21760000   0.01261342
  0.21760000   0.01069625
  0.21760000   0.00907049
  0.21760000   0.00769185
  0.21760000   0.00652276
  0.21760000   0.00553137
  0.21760000   0.00469067
  0.21760000   0.00397775
  0.21760000   0.00337320
  0.21760000   0.00286053
  0.21760000   0.00242578
  0.21760000   0.00205711
  0.21760000   0.00174448
  0.21760000   0.00147937
  0.21760000   0.00125455
  0.21760000   0.00106390
  0.21760000   0.00090222
  0.21760000   0.00076512
  0.21760000   0.00064886
  0.21760000   0.00055027
  0.21760000   0.00046666
  0.21760000   0.00039576
  0.21780000   0.01512721
  0.21780000   0.01283689
  0.21780000   0.01089334
  0.21780000   0.00924407
  0.21780000   0.00784451
  0.21780000   0.00665686
  0.21780000   0.00564902
  0.21780000   0.00479378
  0.21780000   0.00406803
  0.21780000   0.00345215
  0.21780000   0.00292953
  0.21780000   0.00248602
  0.21780000   0.00210967
  0.21780000   0.00179030
  0.21780000   0.00151928
  0.21780000   0.00128929
  0.21780000   0.00109412
  0.21780000   0.00092850
  0.21780000   0.00078796
  0.21780000   0.00066869
  0.21780000   0.00056748
  0.21780000   0.00048159
  0.21780000   0.00040870
  0.21800000   0.01538449
  0.21800000   0.01306432
  0.21800000   0.01109407
  0.21800000   0.00942097
  0.21800000   0.00800021
  0.21800000   0.00679372
  0.21800000   0.00576918
  0.21800000   0.00489916
  0.21800000   0.00416035
  0.21800000   0.00353296
  0.21800000   0.00300019
  0.21800000   0.00254776
  0.21800000   0.00216357
  0.21800000   0.00183732
  0.21800000   0.00156027
  0.21800000   0.00132499
  0.21800000   0.00112520
  0.21800000   0.00095554
  0.21800000   0.00081147
  0.21800000   0.00068912
  0.21800000   0.00058523
  0.21800000   0.00049700
  0.21800000   0.00042207
  0.21820000   0.01564615
  0.21820000   0.01329578
  0.21820000   0.01129850
  0.21820000   0.00960126
  0.21820000   0.00815899
  0.21820000   0.00693339
  0.21820000   0.00589190
  0.21820000   0.00500686
  0.21820000   0.00425477
  0.21820000   0.00361566
  0.21820000   0.00307256
  0.21820000   0.00261104
  0.21820000   0.00221885
  0.21820000   0.00188557
  0.21820000   0.00160236
  0.21820000   0.00136169
  0.21820000   0.00115717
  0.21820000   0.00098338
  0.21820000   0.00083569
  0.21820000   0.00071018
  0.21820000   0.00060353
  0.21820000   0.00051290
  0.21820000   0.00043588
  0.21840000   0.01591227
  0.21840000   0.01353135
  0.21840000   0.01150670
  0.21840000   0.00978501
  0.21840000   0.00832093
  0.21840000   0.00707593
  0.21840000   0.00601722
  0.21840000   0.00511692
  0.21840000   0.00435133
  0.21840000   0.00370030
  0.21840000   0.00314668
  0.21840000   0.00267589
  0.21840000   0.00227554
  0.21840000   0.00193510
  0.21840000   0.00164559
  0.21840000   0.00139940
  0.21840000   0.00119005
  0.21840000   0.00101202
  0.21840000   0.00086063
  0.21840000   0.00073189
  0.21840000   0.00062241
  0.21840000   0.00052931
  0.21840000   0.00045014
  0.21860000   0.01618291
  0.21860000   0.01377109
  0.21860000   0.01171874
  0.21860000   0.00997227
  0.21860000   0.00848609
  0.21860000   0.00722141
  0.21860000   0.00614522
  0.21860000   0.00522941
  0.21860000   0.00445009
  0.21860000   0.00378692
  0.21860000   0.00322258
  0.21860000   0.00274235
  0.21860000   0.00233368
  0.21860000   0.00198593
  0.21860000   0.00168999
  0.21860000   0.00143816
  0.21860000   0.00122386
  0.21860000   0.00104150
  0.21860000   0.00088631
  0.21860000   0.00075425
  0.21860000   0.00064188
  0.21860000   0.00054624
  0.21860000   0.00046486
  0.21880000   0.01645815
  0.21880000   0.01401508
  0.21880000   0.01193469
  0.21880000   0.01016312
  0.21880000   0.00865453
  0.21880000   0.00736988
  0.21880000   0.00627593
  0.21880000   0.00534437
  0.21880000   0.00455109
  0.21880000   0.00387557
  0.21880000   0.00330032
  0.21880000   0.00281046
  0.21880000   0.00239331
  0.21880000   0.00203809
  0.21880000   0.00173559
  0.21880000   0.00147800
  0.21880000   0.00125864
  0.21880000   0.00107184
  0.21880000   0.00091277
  0.21880000   0.00077731
  0.21880000   0.00066195
  0.21880000   0.00056372
  0.21880000   0.00048007
  0.21900000   0.01673809
  0.21900000   0.01426340
  0.21900000   0.01215462
  0.21900000   0.01035762
  0.21900000   0.00882631
  0.21900000   0.00752141
  0.21900000   0.00640944
  0.21900000   0.00546186
  0.21900000   0.00465439
  0.21900000   0.00396630
  0.21900000   0.00337994
  0.21900000   0.00288027
  0.21900000   0.00245447
  0.21900000   0.00209162
  0.21900000   0.00178242
  0.21900000   0.00151893
  0.21900000   0.00129440
  0.21900000   0.00110306
  0.21900000   0.00094001
  0.21900000   0.00080106
  0.21900000   0.00068266
  0.21900000   0.00058176
  0.21900000   0.00049578
  0.21920000   0.01702278
  0.21920000   0.01451612
  0.21920000   0.01237860
  0.21920000   0.01055585
  0.21920000   0.00900151
  0.21920000   0.00767605
  0.21920000   0.00654578
  0.21920000   0.00558194
  0.21920000   0.00476003
  0.21920000   0.00405915
  0.21920000   0.00346147
  0.21920000   0.00295181
  0.21920000   0.00251719
  0.21920000   0.00214656
  0.21920000   0.00183052
  0.21920000   0.00156100
  0.21920000   0.00133118
  0.21920000   0.00113519
  0.21920000   0.00096807
  0.21920000   0.00082555
  0.21920000   0.00070402
  0.21920000   0.00060038
  0.21920000   0.00051200
  0.21940000   0.01731232
  0.21940000   0.01477333
  0.21940000   0.01260672
  0.21940000   0.01075787
  0.21940000   0.00918018
  0.21940000   0.00783388
  0.21940000   0.00668502
  0.21940000   0.00570466
  0.21940000   0.00486807
  0.21940000   0.00415418
  0.21940000   0.00354498
  0.21940000   0.00302512
  0.21940000   0.00258151
  0.21940000   0.00220295
  0.21940000   0.00187991
  0.21940000   0.00160424
  0.21940000   0.00136900
  0.21940000   0.00116826
  0.21940000   0.00099696
  0.21940000   0.00085078
  0.21940000   0.00072604
  0.21940000   0.00061959
  0.21940000   0.00052875
  0.21960000   0.01760679
  0.21960000   0.01503509
  0.21960000   0.01283904
  0.21960000   0.01096376
  0.21960000   0.00936241
  0.21960000   0.00799495
  0.21960000   0.00682723
  0.21960000   0.00583008
  0.21960000   0.00497857
  0.21960000   0.00425143
  0.21960000   0.00363050
  0.21960000   0.00310027
  0.21960000   0.00264747
  0.21960000   0.00226082
  0.21960000   0.00193064
  0.21960000   0.00164868
  0.21960000   0.00140791
  0.21960000   0.00120230
  0.21960000   0.00102672
  0.21960000   0.00087679
  0.21960000   0.00074875
  0.21960000   0.00063942
  0.21960000   0.00054605
  0.21980000   0.01790626
  0.21980000   0.01530149
  0.21980000   0.01307564
  0.21980000   0.01117360
  0.21980000   0.00954825
  0.21980000   0.00815934
  0.21980000   0.00697247
  0.21980000   0.00595826
  0.21980000   0.00509157
  0.21980000   0.00435097
  0.21980000   0.00371809
  0.21980000   0.00317727
  0.21980000   0.00271513
  0.21980000   0.00232021
  0.21980000   0.00198273
  0.21980000   0.00169435
  0.21980000   0.00144791
  0.21980000   0.00123733
  0.21980000   0.00105737
  0.21980000   0.00090359
  0.21980000   0.00077218
  0.21980000   0.00065988
  0.21980000   0.00056392
  0.22000000   0.01821084
  0.22000000   0.01557261
  0.22000000   0.01331661
  0.22000000   0.01138745
  0.22000000   0.00973778
  0.22000000   0.00832711
  0.22000000   0.00712080
  0.22000000   0.00608925
  0.22000000   0.00520715
  0.22000000   0.00445283
  0.22000000   0.00380779
  0.22000000   0.00325620
  0.22000000   0.00278451
  0.22000000   0.00238116
  0.22000000   0.00203624
  0.22000000   0.00174129
  0.22000000   0.00148906
  0.22000000   0.00127337
  0.22000000   0.00108893
  0.22000000   0.00093121
  0.22000000   0.00079634
  0.22000000   0.00068100
  0.22000000   0.00058237
  0.22020000   0.01852059
  0.22020000   0.01584854
  0.22020000   0.01356202
  0.22020000   0.01160540
  0.22020000   0.00993108
  0.22020000   0.00849833
  0.22020000   0.00727229
  0.22020000   0.00622313
  0.22020000   0.00532534
  0.22020000   0.00455708
  0.22020000   0.00389966
  0.22020000   0.00333708
  0.22020000   0.00285567
  0.22020000   0.00244371
  0.22020000   0.00209119
  0.22020000   0.00178952
  0.22020000   0.00153138
  0.22020000   0.00131047
  0.22020000   0.00112144
  0.22020000   0.00095968
  0.22020000   0.00082125
  0.22020000   0.00070280
  0.22020000   0.00060143
  0.22040000   0.01883562
  0.22040000   0.01612936
  0.22040000   0.01381196
  0.22040000   0.01182752
  0.22040000   0.01012822
  0.22040000   0.00867307
  0.22040000   0.00742700
  0.22040000   0.00635996
  0.22040000   0.00544622
  0.22040000   0.00466377
  0.22040000   0.00399374
  0.22040000   0.00341998
  0.22040000   0.00292865
  0.22040000   0.00250791
  0.22040000   0.00214762
  0.22040000   0.00183910
  0.22040000   0.00157490
  0.22040000   0.00134866
  0.22040000   0.00115492
  0.22040000   0.00098901
  0.22040000   0.00084695
  0.22040000   0.00072529
  0.22040000   0.00062111
  0.22060000   0.01915601
  0.22060000   0.01641516
  0.22060000   0.01406650
  0.22060000   0.01205390
  0.22060000   0.01032927
  0.22060000   0.00885141
  0.22060000   0.00758500
  0.22060000   0.00649979
  0.22060000   0.00556985
  0.22060000   0.00477297
  0.22060000   0.00409010
  0.22060000   0.00350494
  0.22060000   0.00300349
  0.22060000   0.00257380
  0.22060000   0.00220558
  0.22060000   0.00189004
  0.22060000   0.00161965
  0.22060000   0.00138795
  0.22060000   0.00118940
  0.22060000   0.00101925
  0.22060000   0.00087345
  0.22060000   0.00074850
  0.22060000   0.00064144
  0.22080000   0.01948185
  0.22080000   0.01670603
  0.22080000   0.01432574
  0.22080000   0.01228461
  0.22080000   0.01053432
  0.22080000   0.00903342
  0.22080000   0.00774637
  0.22080000   0.00664270
  0.22080000   0.00569629
  0.22080000   0.00488472
  0.22080000   0.00418878
  0.22080000   0.00359200
  0.22080000   0.00308025
  0.22080000   0.00264142
  0.22080000   0.00226510
  0.22080000   0.00194241
  0.22080000   0.00166569
  0.22080000   0.00142839
  0.22080000   0.00122490
  0.22080000   0.00105041
  0.22080000   0.00090078
  0.22080000   0.00077246
  0.22080000   0.00066243
  0.22100000   0.01981323
  0.22100000   0.01700205
  0.22100000   0.01458975
  0.22100000   0.01251974
  0.22100000   0.01074344
  0.22100000   0.00921917
  0.22100000   0.00791117
  0.22100000   0.00678876
  0.22100000   0.00582560
  0.22100000   0.00499909
  0.22100000   0.00428985
  0.22100000   0.00368124
  0.22100000   0.00315898
  0.22100000   0.00271081
  0.22100000   0.00232623
  0.22100000   0.00199622
  0.22100000   0.00171303
  0.22100000   0.00147001
  0.22100000   0.00126147
  0.22100000   0.00108252
  0.22100000   0.00092896
  0.22100000   0.00079719
  0.22100000   0.00068411
  0.22120000   0.02015025
  0.22120000   0.01730332
  0.22120000   0.01485864
  0.22120000   0.01275937
  0.22120000   0.01095671
  0.22120000   0.00940874
  0.22120000   0.00807948
  0.22120000   0.00693803
  0.22120000   0.00595784
  0.22120000   0.00511614
  0.22120000   0.00439336
  0.22120000   0.00377269
  0.22120000   0.00323971
  0.22120000   0.00278203
  0.22120000   0.00238902
  0.22120000   0.00205152
  0.22120000   0.00176171
  0.22120000   0.00151284
  0.22120000   0.00129914
  0.22120000   0.00111562
  0.22120000   0.00095803
  0.22120000   0.00082271
  0.22120000   0.00070650
  0.22140000   0.02049301
  0.22140000   0.01760993
  0.22140000   0.01513248
  0.22140000   0.01300359
  0.22140000   0.01117422
  0.22140000   0.00960222
  0.22140000   0.00825137
  0.22140000   0.00709058
  0.22140000   0.00609309
  0.22140000   0.00523593
  0.22140000   0.00449936
  0.22140000   0.00386641
  0.22140000   0.00332251
  0.22140000   0.00285513
  0.22140000   0.00245349
  0.22140000   0.00210836
  0.22140000   0.00181178
  0.22140000   0.00155693
  0.22140000   0.00133792
  0.22140000   0.00114973
  0.22140000   0.00098801
  0.22140000   0.00084904
  0.22140000   0.00072962
  0.22160000   0.02084160
  0.22160000   0.01792197
  0.22160000   0.01541137
  0.22160000   0.01325249
  0.22160000   0.01139605
  0.22160000   0.00979967
  0.22160000   0.00842693
  0.22160000   0.00724649
  0.22160000   0.00623141
  0.22160000   0.00535853
  0.22160000   0.00460793
  0.22160000   0.00396247
  0.22160000   0.00340743
  0.22160000   0.00293014
  0.22160000   0.00251971
  0.22160000   0.00216677
  0.22160000   0.00186328
  0.22160000   0.00160230
  0.22160000   0.00137787
  0.22160000   0.00118488
  0.22160000   0.00101893
  0.22160000   0.00087622
  0.22160000   0.00075350
  0.22180000   0.02119612
  0.22180000   0.01823955
  0.22180000   0.01569540
  0.22180000   0.01350615
  0.22180000   0.01162228
  0.22180000   0.01000119
  0.22180000   0.00860622
  0.22180000   0.00740583
  0.22180000   0.00637287
  0.22180000   0.00548400
  0.22180000   0.00471911
  0.22180000   0.00406091
  0.22180000   0.00349452
  0.22180000   0.00300713
  0.22180000   0.00258772
  0.22180000   0.00222681
  0.22180000   0.00191624
  0.22180000   0.00164899
  0.22180000   0.00141901
  0.22180000   0.00122111
  0.22180000   0.00105082
  0.22180000   0.00090427
  0.22180000   0.00077817
  0.22200000   0.02155667
  0.22200000   0.01856275
  0.22200000   0.01598467
  0.22200000   0.01376467
  0.22200000   0.01185300
  0.22200000   0.01020685
  0.22200000   0.00878932
  0.22200000   0.00756867
  0.22200000   0.00651755
  0.22200000   0.00561241
  0.22200000   0.00483298
  0.22200000   0.00416180
  0.22200000   0.00358384
  0.22200000   0.00308614
  0.22200000   0.00265756
  0.22200000   0.00228851
  0.22200000   0.00197071
  0.22200000   0.00169704
  0.22200000   0.00146138
  0.22200000   0.00125845
  0.22200000   0.00108370
  0.22200000   0.00093322
  0.22200000   0.00080364
  0.22220000   0.02192335
  0.22220000   0.01889168
  0.22220000   0.01627927
  0.22220000   0.01402814
  0.22220000   0.01208831
  0.22220000   0.01041674
  0.22220000   0.00897632
  0.22220000   0.00773510
  0.22220000   0.00666551
  0.22220000   0.00574383
  0.22220000   0.00494960
  0.22220000   0.00426520
  0.22220000   0.00367544
  0.22220000   0.00316723
  0.22220000   0.00272929
  0.22220000   0.00235192
  0.22220000   0.00202672
  0.22220000   0.00174649
  0.22220000   0.00150502
  0.22220000   0.00129693
  0.22220000   0.00111762
  0.22220000   0.00096310
  0.22220000   0.00082995
  0.22240000   0.02229628
  0.22240000   0.01922644
  0.22240000   0.01657931
  0.22240000   0.01429665
  0.22240000   0.01232829
  0.22240000   0.01063095
  0.22240000   0.00916731
  0.22240000   0.00790518
  0.22240000   0.00681683
  0.22240000   0.00587833
  0.22240000   0.00506903
  0.22240000   0.00437117
  0.22240000   0.00376938
  0.22240000   0.00325045
  0.22240000   0.00280296
  0.22240000   0.00241708
  0.22240000   0.00208433
  0.22240000   0.00179739
  0.22240000   0.00154996
  0.22240000   0.00133659
  0.22240000   0.00115259
  0.22240000   0.00099393
  0.22240000   0.00085711
  0.22260000   0.02267555
  0.22260000   0.01956714
  0.22260000   0.01688487
  0.22260000   0.01457031
  0.22260000   0.01257304
  0.22260000   0.01084957
  0.22260000   0.00936236
  0.22260000   0.00807901
  0.22260000   0.00697159
  0.22260000   0.00601598
  0.22260000   0.00519135
  0.22260000   0.00447977
  0.22260000   0.00386573
  0.22260000   0.00333586
  0.22260000   0.00287862
  0.22260000   0.00248406
  0.22260000   0.00214358
  0.22260000   0.00184977
  0.22260000   0.00159624
  0.22260000   0.00137746
  0.22260000   0.00118867
  0.22260000   0.00102575
  0.22260000   0.00088517
  0.22280000   0.02306127
  0.22280000   0.01991387
  0.22280000   0.01719607
  0.22280000   0.01484920
  0.22280000   0.01282265
  0.22280000   0.01107269
  0.22280000   0.00956156
  0.22280000   0.00825667
  0.22280000   0.00712987
  0.22280000   0.00615685
  0.22280000   0.00531662
  0.22280000   0.00459107
  0.22280000   0.00396454
  0.22280000   0.00342351
  0.22280000   0.00295632
  0.22280000   0.00255289
  0.22280000   0.00220451
  0.22280000   0.00190368
  0.22280000   0.00164390
  0.22280000   0.00141958
  0.22280000   0.00122587
  0.22280000   0.00105860
  0.22280000   0.00091415
  0.22300000   0.02345355
  0.22300000   0.02026675
  0.22300000   0.01751300
  0.22300000   0.01513344
  0.22300000   0.01307722
  0.22300000   0.01130039
  0.22300000   0.00976500
  0.22300000   0.00843823
  0.22300000   0.00729174
  0.22300000   0.00630102
  0.22300000   0.00544492
  0.22300000   0.00470514
  0.22300000   0.00406587
  0.22300000   0.00351347
  0.22300000   0.00303612
  0.22300000   0.00262362
  0.22300000   0.00226718
  0.22300000   0.00195916
  0.22300000   0.00169299
  0.22300000   0.00146299
  0.22300000   0.00126424
  0.22300000   0.00109249
  0.22300000   0.00094408
  0.22320000   0.02385250
  0.22320000   0.02062589
  0.22320000   0.01783578
  0.22320000   0.01542311
  0.22320000   0.01333684
  0.22320000   0.01153278
  0.22320000   0.00997277
  0.22320000   0.00862379
  0.22320000   0.00745728
  0.22320000   0.00644857
  0.22320000   0.00557631
  0.22320000   0.00482204
  0.22320000   0.00416980
  0.22320000   0.00360579
  0.22320000   0.00311807
  0.22320000   0.00269632
  0.22320000   0.00233163
  0.22320000   0.00201626
  0.22320000   0.00174355
  0.22320000   0.00150773
  0.22320000   0.00130381
  0.22320000   0.00112747
  0.22320000   0.00097498
  0.22340000   0.02425825
  0.22340000   0.02099138
  0.22340000   0.01816450
  0.22340000   0.01571834
  0.22340000   0.01360161
  0.22340000   0.01176995
  0.22340000   0.01018496
  0.22340000   0.00881342
  0.22340000   0.00762659
  0.22340000   0.00659958
  0.22340000   0.00571088
  0.22340000   0.00494185
  0.22340000   0.00427639
  0.22340000   0.00370054
  0.22340000   0.00320224
  0.22340000   0.00277104
  0.22340000   0.00239791
  0.22340000   0.00207502
  0.22340000   0.00179562
  0.22340000   0.00155384
  0.22340000   0.00134462
  0.22340000   0.00116357
  0.22340000   0.00100690
  0.22360000   0.02467089
  0.22360000   0.02136336
  0.22360000   0.01849929
  0.22360000   0.01601921
  0.22360000   0.01387164
  0.22360000   0.01201200
  0.22360000   0.01040167
  0.22360000   0.00900723
  0.22360000   0.00779974
  0.22360000   0.00675413
  0.22360000   0.00584869
  0.22360000   0.00506464
  0.22360000   0.00438570
  0.22360000   0.00379778
  0.22360000   0.00328868
  0.22360000   0.00284783
  0.22360000   0.00246608
  0.22360000   0.00213550
  0.22360000   0.00184924
  0.22360000   0.00160136
  0.22360000   0.00138670
  0.22360000   0.00120083
  0.22360000   0.00103987
  0.22380000   0.02509055
  0.22380000   0.02174192
  0.22380000   0.01884024
  0.22380000   0.01632585
  0.22380000   0.01414704
  0.22380000   0.01225903
  0.22380000   0.01062299
  0.22380000   0.00920531
  0.22380000   0.00797682
  0.22380000   0.00691229
  0.22380000   0.00598984
  0.22380000   0.00519049
  0.22380000   0.00449781
  0.22380000   0.00389758
  0.22380000   0.00337746
  0.22380000   0.00292675
  0.22380000   0.00253618
  0.22380000   0.00219774
  0.22380000   0.00190447
  0.22380000   0.00165033
  0.22380000   0.00143011
  0.22380000   0.00123928
  0.22380000   0.00107391
  0.22400000   0.02551735
  0.22400000   0.02212720
  0.22400000   0.01918748
  0.22400000   0.01663835
  0.22400000   0.01442790
  0.22400000   0.01251114
  0.22400000   0.01084902
  0.22400000   0.00940774
  0.22400000   0.00815793
  0.22400000   0.00707417
  0.22400000   0.00613438
  0.22400000   0.00531945
  0.22400000   0.00461279
  0.22400000   0.00400001
  0.22400000   0.00346863
  0.22400000   0.00300785
  0.22400000   0.00260828
  0.22400000   0.00226180
  0.22400000   0.00196134
  0.22400000   0.00170080
  0.22400000   0.00147488
  0.22400000   0.00127896
  0.22400000   0.00110908
  0.22420000   0.02595141
  0.22420000   0.02251930
  0.22420000   0.01954112
  0.22420000   0.01695684
  0.22420000   0.01471435
  0.22420000   0.01276843
  0.22420000   0.01107987
  0.22420000   0.00961462
  0.22420000   0.00834315
  0.22420000   0.00723983
  0.22420000   0.00628242
  0.22420000   0.00545163
  0.22420000   0.00473071
  0.22420000   0.00410512
  0.22420000   0.00356227
  0.22420000   0.00309120
  0.22420000   0.00268243
  0.22420000   0.00232772
  0.22420000   0.00201992
  0.22420000   0.00175282
  0.22420000   0.00152104
  0.22420000   0.00131992
  0.22420000   0.00114539
  0.22440000   0.02639285
  0.22440000   0.02291835
  0.22440000   0.01990128
  0.22440000   0.01728143
  0.22440000   0.01500647
  0.22440000   0.01303102
  0.22440000   0.01131562
  0.22440000   0.00982605
  0.22440000   0.00853258
  0.22440000   0.00740938
  0.22440000   0.00643404
  0.22440000   0.00558709
  0.22440000   0.00485164
  0.22440000   0.00421300
  0.22440000   0.00365843
  0.22440000   0.00317687
  0.22440000   0.00275870
  0.22440000   0.00239557
  0.22440000   0.00208025
  0.22440000   0.00180643
  0.22440000   0.00156866
  0.22440000   0.00136219
  0.22440000   0.00118289
  0.22460000   0.02684181
  0.22460000   0.02332447
  0.22460000   0.02026808
  0.22460000   0.01761222
  0.22460000   0.01530440
  0.22460000   0.01329901
  0.22460000   0.01155640
  0.22460000   0.01004214
  0.22460000   0.00872630
  0.22460000   0.00758289
  0.22460000   0.00658931
  0.22460000   0.00572592
  0.22460000   0.00497566
  0.22460000   0.00432372
  0.22460000   0.00375720
  0.22460000   0.00326491
  0.22460000   0.00283713
  0.22460000   0.00246540
  0.22460000   0.00214237
  0.22460000   0.00186168
  0.22460000   0.00161776
  0.22460000   0.00140581
  0.22460000   0.00122162
  0.22480000   0.02729839
  0.22480000   0.02373778
  0.22480000   0.02064164
  0.22480000   0.01794935
  0.22480000   0.01560825
  0.22480000   0.01357251
  0.22480000   0.01180230
  0.22480000   0.01026298
  0.22480000   0.00892443
  0.22480000   0.00776047
  0.22480000   0.00674833
  0.22480000   0.00586820
  0.22480000   0.00510286
  0.22480000   0.00443734
  0.22480000   0.00385863
  0.22480000   0.00335539
  0.22480000   0.00291779
  0.22480000   0.00253726
  0.22480000   0.00220636
  0.22480000   0.00191862
  0.22480000   0.00166841
  0.22480000   0.00145083
  0.22480000   0.00126162
  0.22500000   0.02776274
  0.22500000   0.02415842
  0.22500000   0.02102208
  0.22500000   0.01829294
  0.22500000   0.01591813
  0.22500000   0.01385163
  0.22500000   0.01205343
  0.22500000   0.01048867
  0.22500000   0.00912706
  0.22500000   0.00794222
  0.22500000   0.00691119
  0.22500000   0.00601402
  0.22500000   0.00523331
  0.22500000   0.00455396
  0.22500000   0.00396280
  0.22500000   0.00344838
  0.22500000   0.00300074
  0.22500000   0.00261122
  0.22500000   0.00227226
  0.22500000   0.00197730
  0.22500000   0.00172064
  0.22500000   0.00149729
  0.22500000   0.00130294
  0.22520000   0.02823499
  0.22520000   0.02458651
  0.22520000   0.02140953
  0.22520000   0.01864310
  0.22520000   0.01623416
  0.22520000   0.01413650
  0.22520000   0.01230990
  0.22520000   0.01071933
  0.22520000   0.00933429
  0.22520000   0.00812822
  0.22520000   0.00707798
  0.22520000   0.00616346
  0.22520000   0.00536710
  0.22520000   0.00467364
  0.22520000   0.00406978
  0.22520000   0.00354395
  0.22520000   0.00308606
  0.22520000   0.00268733
  0.22520000   0.00234012
  0.22520000   0.00203778
  0.22520000   0.00177450
  0.22520000   0.00154524
  0.22520000   0.00134560
  0.22540000   0.02871527
  0.22540000   0.02502219
  0.22540000   0.02180412
  0.22540000   0.01899996
  0.22540000   0.01655646
  0.22540000   0.01442723
  0.22540000   0.01257183
  0.22540000   0.01095506
  0.22540000   0.00954622
  0.22540000   0.00831857
  0.22540000   0.00724880
  0.22540000   0.00631661
  0.22540000   0.00550430
  0.22540000   0.00479646
  0.22540000   0.00417965
  0.22540000   0.00364216
  0.22540000   0.00317380
  0.22540000   0.00276567
  0.22540000   0.00241002
  0.22540000   0.00210011
  0.22540000   0.00183005
  0.22540000   0.00159473
  0.22540000   0.00138966
  0.22560000   0.02920371
  0.22560000   0.02546558
  0.22560000   0.02220599
  0.22560000   0.01936366
  0.22560000   0.01688516
  0.22560000   0.01472393
  0.22560000   0.01283934
  0.22560000   0.01119598
  0.22560000   0.00976297
  0.22560000   0.00851339
  0.22560000   0.00742374
  0.22560000   0.00647357
  0.22560000   0.00564502
  0.22560000   0.00492252
  0.22560000   0.00429249
  0.22560000   0.00374310
  0.22560000   0.00326404
  0.22560000   0.00284628
  0.22560000   0.00248200
  0.22560000   0.00216435
  0.22560000   0.00188735
  0.22560000   0.00164580
  0.22560000   0.00143517
  0.22580000   0.02970046
  0.22580000   0.02591683
  0.22580000   0.02261526
  0.22580000   0.01973431
  0.22580000   0.01722039
  0.22580000   0.01502674
  0.22580000   0.01311254
  0.22580000   0.01144220
  0.22580000   0.00998464
  0.22580000   0.00871277
  0.22580000   0.00760291
  0.22580000   0.00663444
  0.22580000   0.00578933
  0.22580000   0.00505189
  0.22580000   0.00440838
  0.22580000   0.00384684
  0.22580000   0.00335684
  0.22580000   0.00292925
  0.22580000   0.00255614
  0.22580000   0.00223055
  0.22580000   0.00194643
  0.22580000   0.00169851
  0.22580000   0.00148217
  0.22600000   0.03020566
  0.22600000   0.02637607
  0.22600000   0.02303207
  0.22600000   0.02011206
  0.22600000   0.01756228
  0.22600000   0.01533577
  0.22600000   0.01339156
  0.22600000   0.01169383
  0.22600000   0.01021135
  0.22600000   0.00891681
  0.22600000   0.00778640
  0.22600000   0.00679930
  0.22600000   0.00593734
  0.22600000   0.00518466
  0.22600000   0.00452740
  0.22600000   0.00395346
  0.22600000   0.00345228
  0.22600000   0.00301464
  0.22600000   0.00263249
  0.22600000   0.00229878
  0.22600000   0.00200737
  0.22600000   0.00175291
  0.22600000   0.00153071
  0.22620000   0.03071944
  0.22620000   0.02684345
  0.22620000   0.02345656
  0.22620000   0.02049704
  0.22620000   0.01791095
  0.22620000   0.01565116
  0.22620000   0.01367651
  0.22620000   0.01195100
  0.22620000   0.01044320
  0.22620000   0.00912564
  0.22620000   0.00797432
  0.22620000   0.00696826
  0.22620000   0.00608913
  0.22620000   0.00532092
  0.22620000   0.00464963
  0.22620000   0.00406303
  0.22620000   0.00355044
  0.22620000   0.00310253
  0.22620000   0.00271112
  0.22620000   0.00236909
  0.22620000   0.00207022
  0.22620000   0.00180905
  0.22620000   0.00158084
  0.22640000   0.03124196
  0.22640000   0.02731911
  0.22640000   0.02388887
  0.22640000   0.02088938
  0.22640000   0.01826654
  0.22640000   0.01597304
  0.22640000   0.01396752
  0.22640000   0.01221382
  0.22640000   0.01068032
  0.22640000   0.00933936
  0.22640000   0.00816678
  0.22640000   0.00714142
  0.22640000   0.00624480
  0.22640000   0.00546076
  0.22640000   0.00477516
  0.22640000   0.00417564
  0.22640000   0.00365139
  0.22640000   0.00319297
  0.22640000   0.00279210
  0.22640000   0.00244156
  0.22640000   0.00213504
  0.22640000   0.00186699
  0.22640000   0.00163261
  0.22660000   0.03177337
  0.22660000   0.02780319
  0.22660000   0.02432915
  0.22660000   0.02128924
  0.22660000   0.01862919
  0.22660000   0.01630153
  0.22660000   0.01426473
  0.22660000   0.01248242
  0.22660000   0.01092282
  0.22660000   0.00955809
  0.22660000   0.00836388
  0.22660000   0.00731888
  0.22660000   0.00640445
  0.22660000   0.00560428
  0.22660000   0.00490408
  0.22660000   0.00429137
  0.22660000   0.00375522
  0.22660000   0.00328605
  0.22660000   0.00287550
  0.22660000   0.00251625
  0.22660000   0.00220188
  0.22660000   0.00192679
  0.22660000   0.00168607
  0.22680000   0.03231380
  0.22680000   0.02829584
  0.22680000   0.02477754
  0.22680000   0.02169674
  0.22680000   0.01899904
  0.22680000   0.01663678
  0.22680000   0.01456826
  0.22680000   0.01275693
  0.22680000   0.01117083
  0.22680000   0.00978194
  0.22680000   0.00856574
  0.22680000   0.00750076
  0.22680000   0.00656819
  0.22680000   0.00575157
  0.22680000   0.00503649
  0.22680000   0.00441031
  0.22680000   0.00386199
  0.22680000   0.00338184
  0.22680000   0.00296139
  0.22680000   0.00259322
  0.22680000   0.00227082
  0.22680000   0.00198851
  0.22680000   0.00174129
  0.22700000   0.03286343
  0.22700000   0.02879722
  0.22700000   0.02523419
  0.22700000   0.02211205
  0.22700000   0.01937623
  0.22700000   0.01697893
  0.22700000   0.01487824
  0.22700000   0.01303748
  0.22700000   0.01142447
  0.22700000   0.01001103
  0.22700000   0.00877247
  0.22700000   0.00768715
  0.22700000   0.00673611
  0.22700000   0.00590274
  0.22700000   0.00517247
  0.22700000   0.00453255
  0.22700000   0.00397180
  0.22700000   0.00348043
  0.22700000   0.00304985
  0.22700000   0.00267255
  0.22700000   0.00234192
  0.22700000   0.00205220
  0.22700000   0.00179832
  0.22720000   0.03342240
  0.22720000   0.02930748
  0.22720000   0.02569925
  0.22720000   0.02253530
  0.22720000   0.01976091
  0.22720000   0.01732810
  0.22720000   0.01519483
  0.22720000   0.01332420
  0.22720000   0.01168387
  0.22720000   0.01024549
  0.22720000   0.00898419
  0.22720000   0.00787818
  0.22720000   0.00690833
  0.22720000   0.00605787
  0.22720000   0.00531212
  0.22720000   0.00465818
  0.22720000   0.00408474
  0.22720000   0.00358190
  0.22720000   0.00314096
  0.22720000   0.00275430
  0.22720000   0.00241525
  0.22720000   0.00211793
  0.22720000   0.00185722
  0.22740000   0.03399086
  0.22740000   0.02982678
  0.22740000   0.02617288
  0.22740000   0.02296665
  0.22740000   0.02015322
  0.22740000   0.01768446
  0.22740000   0.01551815
  0.22740000   0.01361722
  0.22740000   0.01194916
  0.22740000   0.01048544
  0.22740000   0.00920102
  0.22740000   0.00807395
  0.22740000   0.00708495
  0.22740000   0.00621709
  0.22740000   0.00545554
  0.22740000   0.00478729
  0.22740000   0.00420089
  0.22740000   0.00368632
  0.22740000   0.00323478
  0.22740000   0.00283856
  0.22740000   0.00249087
  0.22740000   0.00218577
  0.22740000   0.00191804
  0.22760000   0.03456899
  0.22760000   0.03035527
  0.22760000   0.02665524
  0.22760000   0.02340625
  0.22760000   0.02055332
  0.22760000   0.01804815
  0.22760000   0.01584834
  0.22760000   0.01391668
  0.22760000   0.01222047
  0.22760000   0.01073100
  0.22760000   0.00942309
  0.22760000   0.00827459
  0.22760000   0.00726608
  0.22760000   0.00638049
  0.22760000   0.00560284
  0.22760000   0.00491998
  0.22760000   0.00432034
  0.22760000   0.00379379
  0.22760000   0.00333141
  0.22760000   0.00292539
  0.22760000   0.00256886
  0.22760000   0.00225578
  0.22760000   0.00198086
  0.22780000   0.03515695
  0.22780000   0.03089312
  0.22780000   0.02714647
  0.22780000   0.02385426
  0.22780000   0.02096135
  0.22780000   0.01841931
  0.22780000   0.01618557
  0.22780000   0.01422273
  0.22780000   0.01249794
  0.22780000   0.01098232
  0.22780000   0.00965052
  0.22780000   0.00848022
  0.22780000   0.00745185
  0.22780000   0.00654819
  0.22780000   0.00575412
  0.22780000   0.00505634
  0.22780000   0.00444319
  0.22780000   0.00390439
  0.22780000   0.00343093
  0.22780000   0.00301489
  0.22780000   0.00264930
  0.22780000   0.00232804
  0.22780000   0.00204574
  0.22800000   0.03575490
  0.22800000   0.03144049
  0.22800000   0.02764676
  0.22800000   0.02431085
  0.22800000   0.02137749
  0.22800000   0.01879810
  0.22800000   0.01652996
  0.22800000   0.01453551
  0.22800000   0.01278171
  0.22800000   0.01123953
  0.22800000   0.00988343
  0.22800000   0.00869096
  0.22800000   0.00764236
  0.22800000   0.00672029
  0.22800000   0.00590948
  0.22800000   0.00519649
  0.22800000   0.00456953
  0.22800000   0.00401822
  0.22800000   0.00353342
  0.22800000   0.00310712
  0.22800000   0.00273225
  0.22800000   0.00240261
  0.22800000   0.00211275
  0.22820000   0.03636301
  0.22820000   0.03199756
  0.22820000   0.02815626
  0.22820000   0.02477617
  0.22820000   0.02180188
  0.22820000   0.01918468
  0.22820000   0.01688168
  0.22820000   0.01485516
  0.22820000   0.01307192
  0.22820000   0.01150276
  0.22820000   0.01012196
  0.22820000   0.00890693
  0.22820000   0.00783775
  0.22820000   0.00689692
  0.22820000   0.00606903
  0.22820000   0.00534052
  0.22820000   0.00469947
  0.22820000   0.00413536
  0.22820000   0.00363897
  0.22820000   0.00320217
  0.22820000   0.00281780
  0.22820000   0.00247957
  0.22820000   0.00218195
  0.22840000   0.03698145
  0.22840000   0.03256448
  0.22840000   0.02867515
  0.22840000   0.02525039
  0.22840000   0.02223470
  0.22840000   0.01957921
  0.22840000   0.01724089
  0.22840000   0.01518184
  0.22840000   0.01336872
  0.22840000   0.01177215
  0.22840000   0.01036626
  0.22840000   0.00912827
  0.22840000   0.00803814
  0.22840000   0.00707819
  0.22840000   0.00623290
  0.22840000   0.00548855
  0.22840000   0.00483310
  0.22840000   0.00425592
  0.22840000   0.00374768
  0.22840000   0.00330013
  0.22840000   0.00290603
  0.22840000   0.00255900
  0.22840000   0.00225341
  0.22860000   0.03761040
  0.22860000   0.03314145
  0.22860000   0.02920359
  0.22860000   0.02573368
  0.22860000   0.02267610
  0.22860000   0.01998184
  0.22860000   0.01760773
  0.22860000   0.01551571
  0.22860000   0.01367226
  0.22860000   0.01204785
  0.22860000   0.01061644
  0.22860000   0.00935511
  0.22860000   0.00824364
  0.22860000   0.00726423
  0.22860000   0.00640118
  0.22860000   0.00564068
  0.22860000   0.00497053
  0.22860000   0.00438000
  0.22860000   0.00385964
  0.22860000   0.00340109
  0.22860000   0.00299703
  0.22860000   0.00264097
  0.22860000   0.00232722
  0.22880000   0.03825003
  0.22880000   0.03372863
  0.22880000   0.02974176
  0.22880000   0.02622622
  0.22880000   0.02312626
  0.22880000   0.02039276
  0.22880000   0.01798238
  0.22880000   0.01585692
  0.22880000   0.01398269
  0.22880000   0.01233001
  0.22880000   0.01087267
  0.22880000   0.00958759
  0.22880000   0.00845440
  0.22880000   0.00745516
  0.22880000   0.00657402
  0.22880000   0.00579703
  0.22880000   0.00511187
  0.22880000   0.00450770
  0.22880000   0.00397494
  0.22880000   0.00350514
  0.22880000   0.00309088
  0.22880000   0.00272557
  0.22880000   0.00240345
  0.22900000   0.03890054
  0.22900000   0.03432620
  0.22900000   0.03028984
  0.22900000   0.02672817
  0.22900000   0.02358535
  0.22900000   0.02081212
  0.22900000   0.01836499
  0.22900000   0.01620562
  0.22900000   0.01430017
  0.22900000   0.01261877
  0.22900000   0.01113508
  0.22900000   0.00982584
  0.22900000   0.00867055
  0.22900000   0.00765110
  0.22900000   0.00675152
  0.22900000   0.00595771
  0.22900000   0.00525723
  0.22900000   0.00463912
  0.22900000   0.00409368
  0.22900000   0.00361238
  0.22900000   0.00318766
  0.22900000   0.00281288
  0.22900000   0.00248217
  0.22920000   0.03956209
  0.22920000   0.03493434
  0.22920000   0.03084801
  0.22920000   0.02723973
  0.22920000   0.02405356
  0.22920000   0.02124010
  0.22920000   0.01875574
  0.22920000   0.01656200
  0.22920000   0.01462485
  0.22920000   0.01291430
  0.22920000   0.01140382
  0.22920000   0.01007002
  0.22920000   0.00889223
  0.22920000   0.00785220
  0.22920000   0.00693381
  0.22920000   0.00612284
  0.22920000   0.00540673
  0.22920000   0.00477437
  0.22920000   0.00421597
  0.22920000   0.00372289
  0.22920000   0.00328748
  0.22920000   0.00290299
  0.22920000   0.00256347
  0.22940000   0.04023488
  0.22940000   0.03555326
  0.22940000   0.03141646
  0.22940000   0.02776107
  0.22940000   0.02453104
  0.22940000   0.02167687
  0.22940000   0.01915481
  0.22940000   0.01692620
  0.22940000   0.01495690
  0.22940000   0.01321674
  0.22940000   0.01167904
  0.22940000   0.01032026
  0.22940000   0.00911957
  0.22940000   0.00805857
  0.22940000   0.00712102
  0.22940000   0.00629255
  0.22940000   0.00556047
  0.22940000   0.00491356
  0.22940000   0.00434192
  0.22940000   0.00383679
  0.22940000   0.00339042
  0.22940000   0.00299598
  0.22940000   0.00264744
  0.22960000   0.04091910
  0.22960000   0.03618312
  0.22960000   0.03199538
  0.22960000   0.02829238
  0.22960000   0.02501801
  0.22960000   0.02212262
  0.22960000   0.01956236
  0.22960000   0.01729841
  0.22960000   0.01529649
  0.22960000   0.01352626
  0.22960000   0.01196091
  0.22960000   0.01057672
  0.22960000   0.00935272
  0.22960000   0.00827038
  0.22960000   0.00731329
  0.22960000   0.00646697
  0.22960000   0.00571859
  0.22960000   0.00505682
  0.22960000   0.00447163
  0.22960000   0.00395417
  0.22960000   0.00349659
  0.22960000   0.00309196
  0.22960000   0.00273416
  0.22980000   0.04161494
  0.22980000   0.03682413
  0.22980000   0.03258495
  0.22980000   0.02883385
  0.22980000   0.02551463
  0.22980000   0.02257753
  0.22980000   0.01997857
  0.22980000   0.01767881
  0.22980000   0.01564379
  0.22980000   0.01384304
  0.22980000   0.01224958
  0.22980000   0.01083955
  0.22980000   0.00959184
  0.22980000   0.00848775
  0.22980000   0.00751075
  0.22980000   0.00664622
  0.22980000   0.00588120
  0.22980000   0.00520425
  0.22980000   0.00460522
  0.22980000   0.00407514
  0.22980000   0.00360608
  0.22980000   0.00319101
  0.22980000   0.00282372
  0.23000000   0.04232260
  0.23000000   0.03747649
  0.23000000   0.03318538
  0.23000000   0.02938568
  0.23000000   0.02602110
  0.23000000   0.02304179
  0.23000000   0.02040364
  0.23000000   0.01806756
  0.23000000   0.01599897
  0.23000000   0.01416722
  0.23000000   0.01254521
  0.23000000   0.01110891
  0.23000000   0.00983706
  0.23000000   0.00871083
  0.23000000   0.00771354
  0.23000000   0.00683044
  0.23000000   0.00604844
  0.23000000   0.00535598
  0.23000000   0.00474279
  0.23000000   0.00419981
  0.23000000   0.00371900
  0.23000000   0.00329323
  0.23000000   0.00291621
  0.23020000   0.04304228
  0.23020000   0.03814039
  0.23020000   0.03379686
  0.23020000   0.02994806
  0.23020000   0.02653762
  0.23020000   0.02351559
  0.23020000   0.02083774
  0.23020000   0.01846486
  0.23020000   0.01636220
  0.23020000   0.01449900
  0.23020000   0.01284798
  0.23020000   0.01138496
  0.23020000   0.01008856
  0.23020000   0.00893977
  0.23020000   0.00792181
  0.23020000   0.00701976
  0.23020000   0.00622044
  0.23020000   0.00551213
  0.23020000   0.00488448
  0.23020000   0.00432830
  0.23020000   0.00383546
  0.23020000   0.00339873
  0.23020000   0.00301173
  0.23040000   0.04377417
  0.23040000   0.03881603
  0.23040000   0.03441959
  0.23040000   0.03052118
  0.23040000   0.02706438
  0.23040000   0.02399913
  0.23040000   0.02128108
  0.23040000   0.01887089
  0.23040000   0.01673369
  0.23040000   0.01483854
  0.23040000   0.01315805
  0.23040000   0.01166788
  0.23040000   0.01034648
  0.23040000   0.00917474
  0.23040000   0.00813570
  0.23040000   0.00721434
  0.23040000   0.00639732
  0.23040000   0.00567284
  0.23040000   0.00503040
  0.23040000   0.00446072
  0.23040000   0.00395556
  0.23040000   0.00350761
  0.23040000   0.00311039
  0.23060000   0.04451849
  0.23060000   0.03950363
  0.23060000   0.03505378
  0.23060000   0.03110527
  0.23060000   0.02760158
  0.23060000   0.02449260
  0.23060000   0.02173384
  0.23060000   0.01928584
  0.23060000   0.01711360
  0.23060000   0.01518604
  0.23060000   0.01347559
  0.23060000   0.01195781
  0.23060000   0.01061099
  0.23060000   0.00941587
  0.23060000   0.00835536
  0.23060000   0.00741430
  0.23060000   0.00657924
  0.23060000   0.00583823
  0.23060000   0.00518068
  0.23060000   0.00459719
  0.23060000   0.00407943
  0.23060000   0.00361997
  0.23060000   0.00321227
  0.23080000   0.04527545
  0.23080000   0.04020339
  0.23080000   0.03569965
  0.23080000   0.03170052
  0.23080000   0.02814944
  0.23080000   0.02499621
  0.23080000   0.02219622
  0.23080000   0.01970991
  0.23080000   0.01750213
  0.23080000   0.01554166
  0.23080000   0.01380080
  0.23080000   0.01225496
  0.23080000   0.01088227
  0.23080000   0.00966334
  0.23080000   0.00858095
  0.23080000   0.00761981
  0.23080000   0.00676632
  0.23080000   0.00600844
  0.23080000   0.00533545
  0.23080000   0.00473784
  0.23080000   0.00420717
  0.23080000   0.00373594
  0.23080000   0.00331749
  0.23100000   0.04604527
  0.23100000   0.04091553
  0.23100000   0.03635740
  0.23100000   0.03230715
  0.23100000   0.02870817
  0.23100000   0.02551016
  0.23100000   0.02266844
  0.23100000   0.02014330
  0.23100000   0.01789947
  0.23100000   0.01590561
  0.23100000   0.01413386
  0.23100000   0.01255948
  0.23100000   0.01116048
  0.23100000   0.00991732
  0.23100000   0.00881264
  0.23100000   0.00783101
  0.23100000   0.00695873
  0.23100000   0.00618362
  0.23100000   0.00549484
  0.23100000   0.00488279
  0.23100000   0.00433892
  0.23100000   0.00385562
  0.23100000   0.00342616
  0.23120000   0.04682814
  0.23120000   0.04164026
  0.23120000   0.03702725
  0.23120000   0.03292537
  0.23120000   0.02927797
  0.23120000   0.02603467
  0.23120000   0.02315069
  0.23120000   0.02058622
  0.23120000   0.01830584
  0.23120000   0.01627808
  0.23120000   0.01447495
  0.23120000   0.01287156
  0.23120000   0.01144579
  0.23120000   0.01017796
  0.23120000   0.00905057
  0.23120000   0.00804807
  0.23120000   0.00715661
  0.23120000   0.00636390
  0.23120000   0.00565899
  0.23120000   0.00503217
  0.23120000   0.00447479
  0.23120000   0.00397914
  0.23120000   0.00353839
  0.23140000   0.04762431
  0.23140000   0.04237781
  0.23140000   0.03770943
  0.23140000   0.03355541
  0.23140000   0.02985907
  0.23140000   0.02656996
  0.23140000   0.02364320
  0.23140000   0.02103886
  0.23140000   0.01872142
  0.23140000   0.01665926
  0.23140000   0.01482426
  0.23140000   0.01319140
  0.23140000   0.01173840
  0.23140000   0.01044546
  0.23140000   0.00929493
  0.23140000   0.00827114
  0.23140000   0.00736011
  0.23140000   0.00654943
  0.23140000   0.00582805
  0.23140000   0.00518613
  0.23140000   0.00461491
  0.23140000   0.00410661
  0.23140000   0.00365430
  0.23160000   0.04843399
  0.23160000   0.04312841
  0.23160000   0.03840415
  0.23160000   0.03419749
  0.23160000   0.03045169
  0.23160000   0.02711624
  0.23160000   0.02414617
  0.23160000   0.02150145
  0.23160000   0.01914643
  0.23160000   0.01704937
  0.23160000   0.01518201
  0.23160000   0.01351918
  0.23160000   0.01203849
  0.23160000   0.01071998
  0.23160000   0.00954589
  0.23160000   0.00850039
  0.23160000   0.00756940
  0.23160000   0.00674038
  0.23160000   0.00600216
  0.23160000   0.00534479
  0.23160000   0.00475942
  0.23160000   0.00423817
  0.23160000   0.00377400
  0.23180000   0.04925741
  0.23180000   0.04389228
  0.23180000   0.03911166
  0.23180000   0.03485184
  0.23180000   0.03105606
  0.23180000   0.02767374
  0.23180000   0.02465983
  0.23180000   0.02197420
  0.23180000   0.01958108
  0.23180000   0.01744860
  0.23180000   0.01554837
  0.23180000   0.01385511
  0.23180000   0.01234625
  0.23180000   0.01100172
  0.23180000   0.00980361
  0.23180000   0.00873599
  0.23180000   0.00778464
  0.23180000   0.00693689
  0.23180000   0.00618147
  0.23180000   0.00550831
  0.23180000   0.00490846
  0.23180000   0.00437394
  0.23180000   0.00389763
  0.23200000   0.05009480
  0.23200000   0.04466965
  0.23200000   0.03983218
  0.23200000   0.03551870
  0.23200000   0.03167240
  0.23200000   0.02824269
  0.23200000   0.02518441
  0.23200000   0.02245733
  0.23200000   0.02002559
  0.23200000   0.01785717
  0.23200000   0.01592358
  0.23200000   0.01419937
  0.23200000   0.01266187
  0.23200000   0.01129085
  0.23200000   0.01006830
  0.23200000   0.00897812
  0.23200000   0.00800599
  0.23200000   0.00713913
  0.23200000   0.00636613
  0.23200000   0.00567683
  0.23200000   0.00506217
  0.23200000   0.00451406
  0.23200000   0.00402530
  0.23220000   0.05094640
  0.23220000   0.04546077
  0.23220000   0.04056596
  0.23220000   0.03619829
  0.23220000   0.03230097
  0.23220000   0.02882332
  0.23220000   0.02572013
  0.23220000   0.02295108
  0.23220000   0.02048018
  0.23220000   0.01827531
  0.23220000   0.01630783
  0.23220000   0.01455218
  0.23220000   0.01298555
  0.23220000   0.01158758
  0.23220000   0.01034012
  0.23220000   0.00922696
  0.23220000   0.00823364
  0.23220000   0.00734726
  0.23220000   0.00655631
  0.23220000   0.00585050
  0.23220000   0.00522069
  0.23220000   0.00465867
  0.23220000   0.00415716
  0.23240000   0.05181244
  0.23240000   0.04626587
  0.23240000   0.04131323
  0.23240000   0.03689087
  0.23240000   0.03294199
  0.23240000   0.02941587
  0.23240000   0.02626724
  0.23240000   0.02345568
  0.23240000   0.02094508
  0.23240000   0.01870323
  0.23240000   0.01670135
  0.23240000   0.01491376
  0.23240000   0.01331750
  0.23240000   0.01189211
  0.23240000   0.01061929
  0.23240000   0.00948270
  0.23240000   0.00846776
  0.23240000   0.00756146
  0.23240000   0.00675217
  0.23240000   0.00602949
  0.23240000   0.00538417
  0.23240000   0.00480791
  0.23240000   0.00429333
  0.23260000   0.05269318
  0.23260000   0.04708521
  0.23260000   0.04207424
  0.23260000   0.03759668
  0.23260000   0.03359571
  0.23260000   0.03002059
  0.23260000   0.02682598
  0.23260000   0.02397135
  0.23260000   0.02142052
  0.23260000   0.01914116
  0.23260000   0.01710436
  0.23260000   0.01528431
  0.23260000   0.01365794
  0.23260000   0.01220464
  0.23260000   0.01090598
  0.23260000   0.00974552
  0.23260000   0.00870854
  0.23260000   0.00778191
  0.23260000   0.00695388
  0.23260000   0.00621395
  0.23260000   0.00555277
  0.23260000   0.00496193
  0.23260000   0.00443397
  0.23280000   0.05358886
  0.23280000   0.04791902
  0.23280000   0.04284924
  0.23280000   0.03831597
  0.23280000   0.03426239
  0.23280000   0.03063773
  0.23280000   0.02739658
  0.23280000   0.02449835
  0.23280000   0.02190675
  0.23280000   0.01958933
  0.23280000   0.01751708
  0.23280000   0.01566406
  0.23280000   0.01400707
  0.23280000   0.01252537
  0.23280000   0.01120041
  0.23280000   0.01001562
  0.23280000   0.00895616
  0.23280000   0.00800878
  0.23280000   0.00716161
  0.23280000   0.00640406
  0.23280000   0.00572664
  0.23280000   0.00512089
  0.23280000   0.00457921
  0.23300000   0.05449973
  0.23300000   0.04876757
  0.23300000   0.04363849
  0.23300000   0.03904899
  0.23300000   0.03494228
  0.23300000   0.03126753
  0.23300000   0.02797931
  0.23300000   0.02503692
  0.23300000   0.02240401
  0.23300000   0.02004799
  0.23300000   0.01793976
  0.23300000   0.01605324
  0.23300000   0.01436512
  0.23300000   0.01285453
  0.23300000   0.01150279
  0.23300000   0.01029320
  0.23300000   0.00921082
  0.23300000   0.00824225
  0.23300000   0.00737554
  0.23300000   0.00659998
  0.23300000   0.00590596
  0.23300000   0.00528493
  0.23300000   0.00472921
  0.23320000   0.05542604
  0.23320000   0.04963112
  0.23320000   0.04444226
  0.23320000   0.03979602
  0.23320000   0.03563564
  0.23320000   0.03191027
  0.23320000   0.02857441
  0.23320000   0.02558732
  0.23320000   0.02291253
  0.23320000   0.02051738
  0.23320000   0.01837263
  0.23320000   0.01645208
  0.23320000   0.01473232
  0.23320000   0.01319233
  0.23320000   0.01181333
  0.23320000   0.01057848
  0.23320000   0.00947271
  0.23320000   0.00848254
  0.23320000   0.00759587
  0.23320000   0.00680189
  0.23320000   0.00609090
  0.23320000   0.00545423
  0.23320000   0.00488412
  0.23340000   0.05636806
  0.23340000   0.05050992
  0.23340000   0.04526079
  0.23340000   0.04055731
  0.23340000   0.03634273
  0.23340000   0.03256619
  0.23340000   0.02918215
  0.23340000   0.02614981
  0.23340000   0.02343259
  0.23340000   0.02099775
  0.23340000   0.01881593
  0.23340000   0.01686083
  0.23340000   0.01510889
  0.23340000   0.01353900
  0.23340000   0.01213224
  0.23340000   0.01087165
  0.23340000   0.00974205
  0.23340000   0.00872982
  0.23340000   0.00782277
  0.23340000   0.00700997
  0.23340000   0.00628162
  0.23340000   0.00562895
  0.23340000   0.00504410
  0.23360000   0.05732605
  0.23360000   0.05140425
  0.23360000   0.04609437
  0.23360000   0.04133314
  0.23360000   0.03706383
  0.23360000   0.03323558
  0.23360000   0.02980281
  0.23360000   0.02672464
  0.23360000   0.02396444
  0.23360000   0.02148935
  0.23360000   0.01926991
  0.23360000   0.01727972
  0.23360000   0.01549509
  0.23360000   0.01389478
  0.23360000   0.01245976
  0.23360000   0.01117295
  0.23360000   0.01001904
  0.23360000   0.00898431
  0.23360000   0.00805645
  0.23360000   0.00722442
  0.23360000   0.00647832
  0.23360000   0.00580927
  0.23360000   0.00520932
  0.23380000   0.05830028
  0.23380000   0.05231438
  0.23380000   0.04694328
  0.23380000   0.04212378
  0.23380000   0.03779921
  0.23380000   0.03391870
  0.23380000   0.03043664
  0.23380000   0.02731209
  0.23380000   0.02450834
  0.23380000   0.02199245
  0.23380000   0.01973484
  0.23380000   0.01770901
  0.23380000   0.01589114
  0.23380000   0.01425990
  0.23380000   0.01279611
  0.23380000   0.01148259
  0.23380000   0.01030391
  0.23380000   0.00924622
  0.23380000   0.00829711
  0.23380000   0.00744543
  0.23380000   0.00668117
  0.23380000   0.00599537
  0.23380000   0.00537996
  0.23400000   0.05929102
  0.23400000   0.05324058
  0.23400000   0.04780778
  0.23400000   0.04292952
  0.23400000   0.03854916
  0.23400000   0.03461584
  0.23400000   0.03108393
  0.23400000   0.02791244
  0.23400000   0.02506458
  0.23400000   0.02250731
  0.23400000   0.02021097
  0.23400000   0.01814895
  0.23400000   0.01629731
  0.23400000   0.01463460
  0.23400000   0.01314154
  0.23400000   0.01180081
  0.23400000   0.01059687
  0.23400000   0.00951576
  0.23400000   0.00854495
  0.23400000   0.00767319
  0.23400000   0.00689037
  0.23400000   0.00618742
  0.23400000   0.00555618
  0.23420000   0.06029856
  0.23420000   0.05418314
  0.23420000   0.04868816
  0.23420000   0.04375063
  0.23420000   0.03931395
  0.23420000   0.03532729
  0.23420000   0.03174497
  0.23420000   0.02852596
  0.23420000   0.02563342
  0.23420000   0.02303421
  0.23420000   0.02069858
  0.23420000   0.01859981
  0.23420000   0.01671386
  0.23420000   0.01501915
  0.23420000   0.01349628
  0.23420000   0.01212784
  0.23420000   0.01089815
  0.23420000   0.00979315
  0.23420000   0.00880019
  0.23420000   0.00790792
  0.23420000   0.00710612
  0.23420000   0.00638562
  0.23420000   0.00573817
  0.23440000   0.06132317
  0.23440000   0.05514234
  0.23440000   0.04958472
  0.23440000   0.04458742
  0.23440000   0.04009389
  0.23440000   0.03605332
  0.23440000   0.03242004
  0.23440000   0.02915295
  0.23440000   0.02621515
  0.23440000   0.02357343
  0.23440000   0.02119794
  0.23440000   0.01906186
  0.23440000   0.01714103
  0.23440000   0.01541378
  0.23440000   0.01386059
  0.23440000   0.01246392
  0.23440000   0.01120799
  0.23440000   0.01007862
  0.23440000   0.00906306
  0.23440000   0.00814983
  0.23440000   0.00732862
  0.23440000   0.00659017
  0.23440000   0.00592612
  0.23460000   0.06236514
  0.23460000   0.05611848
  0.23460000   0.05049775
  0.23460000   0.04544017
  0.23460000   0.04088927
  0.23460000   0.03679426
  0.23460000   0.03310944
  0.23460000   0.02979370
  0.23460000   0.02681006
  0.23460000   0.02412525
  0.23460000   0.02170933
  0.23460000   0.01953537
  0.23460000   0.01757912
  0.23460000   0.01581878
  0.23460000   0.01423473
  0.23460000   0.01280931
  0.23460000   0.01152664
  0.23460000   0.01037241
  0.23460000   0.00933376
  0.23460000   0.00839913
  0.23460000   0.00755809
  0.23460000   0.00680127
  0.23460000   0.00612023
  0.23480000   0.06342476
  0.23480000   0.05711185
  0.23480000   0.05142755
  0.23480000   0.04630920
  0.23480000   0.04170040
  0.23480000   0.03755039
  0.23480000   0.03381347
  0.23480000   0.03044851
  0.23480000   0.02741846
  0.23480000   0.02468998
  0.23480000   0.02223305
  0.23480000   0.02002063
  0.23480000   0.01802839
  0.23480000   0.01623441
  0.23480000   0.01461896
  0.23480000   0.01316427
  0.23480000   0.01185433
  0.23480000   0.01067475
  0.23480000   0.00961255
  0.23480000   0.00865605
  0.23480000   0.00779473
  0.23480000   0.00701912
  0.23480000   0.00632069
  0.23500000   0.06450232
  0.23500000   0.05812275
  0.23500000   0.05237442
  0.23500000   0.04719480
  0.23500000   0.04252758
  0.23500000   0.03832203
  0.23500000   0.03453245
  0.23500000   0.03111768
  0.23500000   0.02804064
  0.23500000   0.02526791
  0.23500000   0.02276938
  0.23500000   0.02051793
  0.23500000   0.01848913
  0.23500000   0.01666095
  0.23500000   0.01501355
  0.23500000   0.01352905
  0.23500000   0.01219134
  0.23500000   0.01098591
  0.23500000   0.00989967
  0.23500000   0.00892083
  0.23500000   0.00803879
  0.23500000   0.00724395
  0.23500000   0.00652771
  0.23520000   0.06559814
  0.23520000   0.05915150
  0.23520000   0.05333868
  0.23520000   0.04809730
  0.23520000   0.04337113
  0.23520000   0.03910949
  0.23520000   0.03526668
  0.23520000   0.03180154
  0.23520000   0.02867691
  0.23520000   0.02585934
  0.23520000   0.02331863
  0.23520000   0.02102757
  0.23520000   0.01896163
  0.23520000   0.01709868
  0.23520000   0.01541878
  0.23520000   0.01390393
  0.23520000   0.01253792
  0.23520000   0.01130612
  0.23520000   0.01019535
  0.23520000   0.00919371
  0.23520000   0.00829047
  0.23520000   0.00747598
  0.23520000   0.00674151
  0.23540000   0.06671252
  0.23540000   0.06019840
  0.23540000   0.05432065
  0.23540000   0.04901702
  0.23540000   0.04423137
  0.23540000   0.03991309
  0.23540000   0.03601650
  0.23540000   0.03250039
  0.23540000   0.02932760
  0.23540000   0.02646459
  0.23540000   0.02388111
  0.23540000   0.02154985
  0.23540000   0.01944619
  0.23540000   0.01754791
  0.23540000   0.01583494
  0.23540000   0.01428919
  0.23540000   0.01289435
  0.23540000   0.01163566
  0.23540000   0.01049985
  0.23540000   0.00947492
  0.23540000   0.00855004
  0.23540000   0.00771544
  0.23540000   0.00696231
  0.23560000   0.06784576
  0.23560000   0.06126378
  0.23560000   0.05532064
  0.23560000   0.04995427
  0.23560000   0.04510864
  0.23560000   0.04073318
  0.23560000   0.03678222
  0.23560000   0.03321458
  0.23560000   0.02999303
  0.23560000   0.02708399
  0.23560000   0.02445714
  0.23560000   0.02208509
  0.23560000   0.01994312
  0.23560000   0.01800892
  0.23560000   0.01626231
  0.23560000   0.01468512
  0.23560000   0.01326089
  0.23560000   0.01197480
  0.23560000   0.01081345
  0.23560000   0.00976473
  0.23560000   0.00881772
  0.23560000   0.00796256
  0.23560000   0.00719034
  0.23580000   0.06899819
  0.23580000   0.06234794
  0.23580000   0.05633899
  0.23580000   0.05090940
  0.23580000   0.04600326
  0.23580000   0.04157007
  0.23580000   0.03756419
  0.23580000   0.03394442
  0.23580000   0.03067353
  0.23580000   0.02771786
  0.23580000   0.02504704
  0.23580000   0.02263360
  0.23580000   0.02045273
  0.23580000   0.01848202
  0.23580000   0.01670121
  0.23580000   0.01509200
  0.23580000   0.01363785
  0.23580000   0.01232382
  0.23580000   0.01113640
  0.23580000   0.01006340
  0.23580000   0.00909379
  0.23580000   0.00821760
  0.23580000   0.00742583
  0.23600000   0.07017012
  0.23600000   0.06345123
  0.23600000   0.05737602
  0.23600000   0.05188274
  0.23600000   0.04691558
  0.23600000   0.04242412
  0.23600000   0.03836275
  0.23600000   0.03469028
  0.23600000   0.03136944
  0.23600000   0.02836654
  0.23600000   0.02565115
  0.23600000   0.02319571
  0.23600000   0.02097535
  0.23600000   0.01896754
  0.23600000   0.01715194
  0.23600000   0.01551014
  0.23600000   0.01402551
  0.23600000   0.01268300
  0.23600000   0.01146899
  0.23600000   0.01037119
  0.23600000   0.00937848
  0.23600000   0.00848079
  0.23600000   0.00766903
  0.23620000   0.07136188
  0.23620000   0.06457398
  0.23620000   0.05843209
  0.23620000   0.05287463
  0.23620000   0.04784594
  0.23620000   0.04329566
  0.23620000   0.03917825
  0.23620000   0.03545248
  0.23620000   0.03208110
  0.23620000   0.02903038
  0.23620000   0.02626980
  0.23620000   0.02377176
  0.23620000   0.02151130
  0.23620000   0.01946580
  0.23620000   0.01761482
  0.23620000   0.01593986
  0.23620000   0.01442418
  0.23620000   0.01305263
  0.23620000   0.01181150
  0.23620000   0.01068840
  0.23620000   0.00967209
  0.23620000   0.00875241
  0.23620000   0.00792019
  0.23640000   0.07257381
  0.23640000   0.06571653
  0.23640000   0.05950753
  0.23640000   0.05388543
  0.23640000   0.04879471
  0.23640000   0.04418507
  0.23640000   0.04001104
  0.23640000   0.03623140
  0.23640000   0.03280888
  0.23640000   0.02970972
  0.23640000   0.02690335
  0.23640000   0.02436210
  0.23640000   0.02206092
  0.23640000   0.01997712
  0.23640000   0.01809017
  0.23640000   0.01638147
  0.23640000   0.01483417
  0.23640000   0.01343303
  0.23640000   0.01216424
  0.23640000   0.01101529
  0.23640000   0.00997487
  0.23640000   0.00903273
  0.23640000   0.00817957
  0.23660000   0.07380624
  0.23660000   0.06687922
  0.23660000   0.06060269
  0.23660000   0.05491550
  0.23660000   0.04976223
  0.23660000   0.04509270
  0.23660000   0.04086148
  0.23660000   0.03702739
  0.23660000   0.03355313
  0.23660000   0.03040492
  0.23660000   0.02755214
  0.23660000   0.02496707
  0.23660000   0.02262456
  0.23660000   0.02050186
  0.23660000   0.01857834
  0.23660000   0.01683530
  0.23660000   0.01525580
  0.23660000   0.01382450
  0.23660000   0.01252749
  0.23660000   0.01135218
  0.23660000   0.01028713
  0.23660000   0.00932201
  0.23660000   0.00844744
  0.23680000   0.07505952
  0.23680000   0.06806240
  0.23680000   0.06171795
  0.23680000   0.05596519
  0.23680000   0.05074888
  0.23680000   0.04601893
  0.23680000   0.04172996
  0.23680000   0.03784083
  0.23680000   0.03431423
  0.23680000   0.03111636
  0.23680000   0.02821656
  0.23680000   0.02558703
  0.23680000   0.02320258
  0.23680000   0.02104036
  0.23680000   0.01907966
  0.23680000   0.01730168
  0.23680000   0.01568940
  0.23680000   0.01422737
  0.23680000   0.01290159
  0.23680000   0.01169935
  0.23680000   0.01060916
  0.23680000   0.00962055
  0.23680000   0.00872407
  0.23700000   0.07633399
  0.23700000   0.06926644
  0.23700000   0.06285365
  0.23700000   0.05703488
  0.23700000   0.05175503
  0.23700000   0.04696413
  0.23700000   0.04261685
  0.23700000   0.03867209
  0.23700000   0.03509256
  0.23700000   0.03184441
  0.23700000   0.02889696
  0.23700000   0.02622237
  0.23700000   0.02379535
  0.23700000   0.02159299
  0.23700000   0.01959449
  0.23700000   0.01778097
  0.23700000   0.01613530
  0.23700000   0.01464196
  0.23700000   0.01328684
  0.23700000   0.01205714
  0.23700000   0.01094125
  0.23700000   0.00992864
  0.23700000   0.00900976
  0.23720000   0.07763002
  0.23720000   0.07049169
  0.23720000   0.06401018
  0.23720000   0.05812495
  0.23720000   0.05278107
  0.23720000   0.04792868
  0.23720000   0.04352254
  0.23720000   0.03952157
  0.23720000   0.03588849
  0.23720000   0.03258946
  0.23720000   0.02959375
  0.23720000   0.02687344
  0.23720000   0.02440323
  0.23720000   0.02216010
  0.23720000   0.02012318
  0.23720000   0.01827351
  0.23720000   0.01659387
  0.23720000   0.01506862
  0.23720000   0.01368358
  0.23720000   0.01242585
  0.23720000   0.01128373
  0.23720000   0.01024660
  0.23720000   0.00930479
  0.23740000   0.07894795
  0.23740000   0.07173854
  0.23740000   0.06518791
  0.23740000   0.05923578
  0.23740000   0.05382738
  0.23740000   0.04891298
  0.23740000   0.04444742
  0.23740000   0.04038966
  0.23740000   0.03670244
  0.23740000   0.03335190
  0.23740000   0.03030729
  0.23740000   0.02754066
  0.23740000   0.02502661
  0.23740000   0.02274209
  0.23740000   0.02066612
  0.23740000   0.01877968
  0.23740000   0.01706544
  0.23740000   0.01550770
  0.23740000   0.01409215
  0.23740000   0.01280583
  0.23740000   0.01163692
  0.23740000   0.01057472
  0.23740000   0.00960947
  0.23760000   0.08028816
  0.23760000   0.07300734
  0.23760000   0.06638723
  0.23760000   0.06036777
  0.23760000   0.05489437
  0.23760000   0.04991744
  0.23760000   0.04539190
  0.23760000   0.04127677
  0.23760000   0.03753480
  0.23760000   0.03413214
  0.23760000   0.03103800
  0.23760000   0.02822440
  0.23760000   0.02566589
  0.23760000   0.02333933
  0.23760000   0.02122369
  0.23760000   0.01929985
  0.23760000   0.01755040
  0.23760000   0.01595955
  0.23760000   0.01451291
  0.23760000   0.01319741
  0.23760000   0.01200115
  0.23760000   0.01091334
  0.23760000   0.00992413
  0.23780000   0.08165101
  0.23780000   0.07429849
  0.23780000   0.06760852
  0.23780000   0.06152130
  0.23780000   0.05598243
  0.23780000   0.05094246
  0.23780000   0.04635639
  0.23780000   0.04218330
  0.23780000   0.03838599
  0.23780000   0.03493059
  0.23780000   0.03178630
  0.23780000   0.02892508
  0.23780000   0.02632146
  0.23780000   0.02395223
  0.23780000   0.02179627
  0.23780000   0.01983440
  0.23780000   0.01804912
  0.23780000   0.01642455
  0.23780000   0.01494622
  0.23780000   0.01360095
  0.23780000   0.01237678
  0.23780000   0.01126279
  0.23780000   0.01024907
  0.23800000   0.08303689
  0.23800000   0.07561237
  0.23800000   0.06885219
  0.23800000   0.06269680
  0.23800000   0.05709199
  0.23800000   0.05198845
  0.23800000   0.04734130
  0.23800000   0.04310969
  0.23800000   0.03925643
  0.23800000   0.03574767
  0.23800000   0.03255259
  0.23800000   0.02964313
  0.23800000   0.02699375
  0.23800000   0.02458119
  0.23800000   0.02238428
  0.23800000   0.02038373
  0.23800000   0.01856200
  0.23800000   0.01690308
  0.23800000   0.01539244
  0.23800000   0.01401682
  0.23800000   0.01276414
  0.23800000   0.01162342
  0.23800000   0.01058464
  0.23820000   0.08444618
  0.23820000   0.07694939
  0.23820000   0.07011865
  0.23820000   0.06389467
  0.23820000   0.05822345
  0.23820000   0.05305585
  0.23820000   0.04834708
  0.23820000   0.04405637
  0.23820000   0.04014656
  0.23820000   0.03658381
  0.23820000   0.03333730
  0.23820000   0.03037895
  0.23820000   0.02768317
  0.23820000   0.02522663
  0.23820000   0.02298811
  0.23820000   0.02094825
  0.23820000   0.01908942
  0.23820000   0.01739554
  0.23820000   0.01585197
  0.23820000   0.01444538
  0.23820000   0.01316361
  0.23820000   0.01199558
  0.23820000   0.01093119
  0.23840000   0.08587927
  0.23840000   0.07830994
  0.23840000   0.07140829
  0.23840000   0.06511533
  0.23840000   0.05937726
  0.23840000   0.05414509
  0.23840000   0.04937416
  0.23840000   0.04502377
  0.23840000   0.04105680
  0.23840000   0.03743946
  0.23840000   0.03414089
  0.23840000   0.03113300
  0.23840000   0.02839015
  0.23840000   0.02588899
  0.23840000   0.02360821
  0.23840000   0.02152838
  0.23840000   0.01963180
  0.23840000   0.01790231
  0.23840000   0.01632520
  0.23840000   0.01488703
  0.23840000   0.01357557
  0.23840000   0.01237964
  0.23840000   0.01128907
  0.23860000   0.08733656
  0.23860000   0.07969443
  0.23860000   0.07272156
  0.23860000   0.06635921
  0.23860000   0.06055384
  0.23860000   0.05525661
  0.23860000   0.05042298
  0.23860000   0.04601234
  0.23860000   0.04198763
  0.23860000   0.03831506
  0.23860000   0.03496380
  0.23860000   0.03190572
  0.23860000   0.02911516
  0.23860000   0.02656870
  0.23860000   0.02424499
  0.23860000   0.02212454
  0.23860000   0.02018956
  0.23860000   0.01842383
  0.23860000   0.01681253
  0.23860000   0.01534216
  0.23860000   0.01400040
  0.23860000   0.01277599
  0.23860000   0.01165866
  0.23880000   0.08881845
  0.23880000   0.08110327
  0.23880000   0.07405886
  0.23880000   0.06762676
  0.23880000   0.06175365
  0.23880000   0.05639086
  0.23880000   0.05149401
  0.23880000   0.04702255
  0.23880000   0.04293950
  0.23880000   0.03921109
  0.23880000   0.03580649
  0.23880000   0.03269757
  0.23880000   0.02985863
  0.23880000   0.02726622
  0.23880000   0.02489892
  0.23880000   0.02273718
  0.23880000   0.02076314
  0.23880000   0.01896051
  0.23880000   0.01731439
  0.23880000   0.01581119
  0.23880000   0.01443851
  0.23880000   0.01318500
  0.23880000   0.01204033
  0.23900000   0.09032535
  0.23900000   0.08253690
  0.23900000   0.07542064
  0.23900000   0.06891841
  0.23900000   0.06297713
  0.23900000   0.05754831
  0.23900000   0.05258770
  0.23900000   0.04805486
  0.23900000   0.04391287
  0.23900000   0.04012800
  0.23900000   0.03666943
  0.23900000   0.03350902
  0.23900000   0.03062104
  0.23900000   0.02798201
  0.23900000   0.02557045
  0.23900000   0.02336675
  0.23900000   0.02135299
  0.23900000   0.01951280
  0.23900000   0.01783120
  0.23900000   0.01629453
  0.23900000   0.01489030
  0.23900000   0.01360710
  0.23900000   0.01243448
  0.23920000   0.09185767
  0.23920000   0.08399574
  0.23920000   0.07680734
  0.23920000   0.07023462
  0.23920000   0.06422474
  0.23920000   0.05872942
  0.23920000   0.05370453
  0.23920000   0.04910976
  0.23920000   0.04490824
  0.23920000   0.04106629
  0.23920000   0.03755312
  0.23920000   0.03434056
  0.23920000   0.03140288
  0.23920000   0.02871655
  0.23920000   0.02626005
  0.23920000   0.02401372
  0.23920000   0.02195956
  0.23920000   0.02008114
  0.23920000   0.01836341
  0.23920000   0.01679263
  0.23920000   0.01535622
  0.23920000   0.01404268
  0.23920000   0.01284151
  0.23940000   0.09341584
  0.23940000   0.08548023
  0.23940000   0.07821941
  0.23940000   0.07157585
  0.23940000   0.06549697
  0.23940000   0.05993467
  0.23940000   0.05484500
  0.23940000   0.05018773
  0.23940000   0.04592610
  0.23940000   0.04202646
  0.23940000   0.03845803
  0.23940000   0.03519267
  0.23940000   0.03220462
  0.23940000   0.02947032
  0.23940000   0.02696820
  0.23940000   0.02467856
  0.23940000   0.02258333
  0.23940000   0.02066601
  0.23940000   0.01891148
  0.23940000   0.01730592
  0.23940000   0.01583668
  0.23940000   0.01449219
  0.23940000   0.01326185
  0.23960000   0.09500029
  0.23960000   0.08699082
  0.23960000   0.07965731
  0.23960000   0.07294258
  0.23960000   0.06679428
  0.23960000   0.06116456
  0.23960000   0.05600959
  0.23960000   0.05128928
  0.23960000   0.04696695
  0.23960000   0.04300900
  0.23960000   0.03938468
  0.23960000   0.03606586
  0.23960000   0.03302677
  0.23960000   0.03024382
  0.23960000   0.02769541
  0.23960000   0.02536176
  0.23960000   0.02322478
  0.23960000   0.02126787
  0.23960000   0.01947587
  0.23960000   0.01783488
  0.23960000   0.01633216
  0.23960000   0.01495607
  0.23960000   0.01369592
  0.23980000   0.09661146
  0.23980000   0.08852795
  0.23980000   0.08112151
  0.23980000   0.07433527
  0.23980000   0.06811718
  0.23980000   0.06241957
  0.23980000   0.05719880
  0.23980000   0.05241491
  0.23980000   0.04803130
  0.23980000   0.04401443
  0.23980000   0.04033359
  0.23980000   0.03696066
  0.23980000   0.03386986
  0.23980000   0.03103758
  0.23980000   0.02844218
  0.23980000   0.02606384
  0.23980000   0.02388440
  0.23980000   0.02188723
  0.23980000   0.02005708
  0.23980000   0.01837997
  0.23980000   0.01684311
  0.23980000   0.01543476
  0.23980000   0.01414418
  0.24000000   0.09824978
  0.24000000   0.09009208
  0.24000000   0.08261247
  0.24000000   0.07575442
  0.24000000   0.06946615
  0.24000000   0.06370022
  0.24000000   0.05841316
  0.24000000   0.05356515
  0.24000000   0.04911968
  0.24000000   0.04504328
  0.24000000   0.04130529
  0.24000000   0.03787759
  0.24000000   0.03473441
  0.24000000   0.03185211
  0.24000000   0.02920903
  0.24000000   0.02678530
  0.24000000   0.02456272
  0.24000000   0.02252459
  0.24000000   0.02065560
  0.24000000   0.01894169
  0.24000000   0.01737002
  0.24000000   0.01592876
  0.24000000   0.01460709
  0.24020000   0.09991572
  0.24020000   0.09168369
  0.24020000   0.08413069
  0.24020000   0.07720052
  0.24020000   0.07084170
  0.24020000   0.06500702
  0.24020000   0.05965319
  0.24020000   0.05474053
  0.24020000   0.05023263
  0.24020000   0.04609610
  0.24020000   0.04230032
  0.24020000   0.03881720
  0.24020000   0.03562095
  0.24020000   0.03268795
  0.24020000   0.02999650
  0.24020000   0.02752669
  0.24020000   0.02526026
  0.24020000   0.02318047
  0.24020000   0.02127193
  0.24020000   0.01952055
  0.24020000   0.01791338
  0.24020000   0.01643854
  0.24020000   0.01508513
  0.24040000   0.10160972
  0.24040000   0.09330325
  0.24040000   0.08567664
  0.24040000   0.07867408
  0.24040000   0.07224436
  0.24040000   0.06634051
  0.24040000   0.06091943
  0.24040000   0.05594160
  0.24040000   0.05137070
  0.24040000   0.04717344
  0.24040000   0.04331924
  0.24040000   0.03978003
  0.24040000   0.03653006
  0.24040000   0.03354567
  0.24040000   0.03080514
  0.24040000   0.02828854
  0.24040000   0.02597756
  0.24040000   0.02385540
  0.24040000   0.02190662
  0.24040000   0.02011706
  0.24040000   0.01847370
  0.24040000   0.01696460
  0.24040000   0.01557878
  0.24060000   0.10333225
  0.24060000   0.09495124
  0.24060000   0.08725084
  0.24060000   0.08017561
  0.24060000   0.07367464
  0.24060000   0.06770121
  0.24060000   0.06221243
  0.24060000   0.05716890
  0.24060000   0.05253445
  0.24060000   0.04827586
  0.24060000   0.04436261
  0.24060000   0.04076667
  0.24060000   0.03746229
  0.24060000   0.03442582
  0.24060000   0.03163552
  0.24060000   0.02907142
  0.24060000   0.02671518
  0.24060000   0.02454993
  0.24060000   0.02256020
  0.24060000   0.02073176
  0.24060000   0.01905151
  0.24060000   0.01750746
  0.24060000   0.01608856
  0.24080000   0.10508378
  0.24080000   0.09662815
  0.24080000   0.08885379
  0.24080000   0.08170564
  0.24080000   0.07513309
  0.24080000   0.06908969
  0.24080000   0.06353274
  0.24080000   0.05842301
  0.24080000   0.05372445
  0.24080000   0.04940394
  0.24080000   0.04543102
  0.24080000   0.04177770
  0.24080000   0.03841824
  0.24080000   0.03532900
  0.24080000   0.03248822
  0.24080000   0.02987591
  0.24080000   0.02747368
  0.24080000   0.02526464
  0.24080000   0.02323324
  0.24080000   0.02136519
  0.24080000   0.01964736
  0.24080000   0.01806766
  0.24080000   0.01661498
  0.24100000   0.10686480
  0.24100000   0.09833448
  0.24100000   0.09048601
  0.24100000   0.08326470
  0.24100000   0.07662026
  0.24100000   0.07050650
  0.24100000   0.06488093
  0.24100000   0.05970450
  0.24100000   0.05494130
  0.24100000   0.05055828
  0.24100000   0.04652506
  0.24100000   0.04281370
  0.24100000   0.03939850
  0.24100000   0.03625579
  0.24100000   0.03336383
  0.24100000   0.03070259
  0.24100000   0.02825366
  0.24100000   0.02600010
  0.24100000   0.02392631
  0.24100000   0.02201794
  0.24100000   0.02026181
  0.24100000   0.01864575
  0.24100000   0.01715860
  0.24120000   0.10867579
  0.24120000   0.10007075
  0.24120000   0.09214803
  0.24120000   0.08485332
  0.24120000   0.07813669
  0.24120000   0.07195220
  0.24120000   0.06625759
  0.24120000   0.06101397
  0.24120000   0.05618558
  0.24120000   0.05173947
  0.24120000   0.04764534
  0.24120000   0.04387531
  0.24120000   0.04040368
  0.24120000   0.03720682
  0.24120000   0.03426296
  0.24120000   0.03155208
  0.24120000   0.02905573
  0.24120000   0.02675691
  0.24120000   0.02464000
  0.24120000   0.02269059
  0.24120000   0.02089542
  0.24120000   0.01924230
  0.24120000   0.01771997
  0.24140000   0.11051724
  0.24140000   0.10183745
  0.24140000   0.09384037
  0.24140000   0.08647208
  0.24140000   0.07968297
  0.24140000   0.07342739
  0.24140000   0.06766331
  0.24140000   0.06235203
  0.24140000   0.05745791
  0.24140000   0.05294814
  0.24140000   0.04879249
  0.24140000   0.04496313
  0.24140000   0.04143441
  0.24140000   0.03818270
  0.24140000   0.03518625
  0.24140000   0.03242501
  0.24140000   0.02988049
  0.24140000   0.02753569
  0.24140000   0.02537492
  0.24140000   0.02338373
  0.24140000   0.02154881
  0.24140000   0.01985789
  0.24140000   0.01829966
  0.24160000   0.11238966
  0.24160000   0.10363513
  0.24160000   0.09556358
  0.24160000   0.08812152
  0.24160000   0.08125966
  0.24160000   0.07493266
  0.24160000   0.06909870
  0.24160000   0.06371928
  0.24160000   0.05875892
  0.24160000   0.05418492
  0.24160000   0.04996714
  0.24160000   0.04607782
  0.24160000   0.04249134
  0.24160000   0.03918409
  0.24160000   0.03613434
  0.24160000   0.03332200
  0.24160000   0.03072860
  0.24160000   0.02833707
  0.24160000   0.02613170
  0.24160000   0.02409799
  0.24160000   0.02222257
  0.24160000   0.02049312
  0.24160000   0.01889828
  0.24180000   0.11429357
  0.24180000   0.10546432
  0.24180000   0.09731823
  0.24180000   0.08980221
  0.24180000   0.08286737
  0.24180000   0.07646860
  0.24180000   0.07056437
  0.24180000   0.06511635
  0.24180000   0.06008924
  0.24180000   0.05545046
  0.24180000   0.05116995
  0.24180000   0.04722003
  0.24180000   0.04357512
  0.24180000   0.04021165
  0.24180000   0.03710788
  0.24180000   0.03424373
  0.24180000   0.03160070
  0.24180000   0.02916171
  0.24180000   0.02691099
  0.24180000   0.02483401
  0.24180000   0.02291735
  0.24180000   0.02114863
  0.24180000   0.01951643
  0.24200000   0.11622947
  0.24200000   0.10732554
  0.24200000   0.09910486
  0.24200000   0.09151476
  0.24200000   0.08450668
  0.24200000   0.07803584
  0.24200000   0.07206095
  0.24200000   0.06654390
  0.24200000   0.06144953
  0.24200000   0.05674541
  0.24200000   0.05240159
  0.24200000   0.04839043
  0.24200000   0.04468643
  0.24200000   0.04126605
  0.24200000   0.03810755
  0.24200000   0.03519087
  0.24200000   0.03249747
  0.24200000   0.03001026
  0.24200000   0.02771345
  0.24200000   0.02559244
  0.24200000   0.02363379
  0.24200000   0.02182505
  0.24200000   0.02015476
  0.24220000   0.11819789
  0.24220000   0.10921937
  0.24220000   0.10092406
  0.24220000   0.09325973
  0.24220000   0.08617821
  0.24220000   0.07963501
  0.24220000   0.07358909
  0.24220000   0.06800257
  0.24220000   0.06284046
  0.24220000   0.05807046
  0.24220000   0.05366273
  0.24220000   0.04958971
  0.24220000   0.04582597
  0.24220000   0.04234799
  0.24220000   0.03913406
  0.24220000   0.03616411
  0.24220000   0.03341961
  0.24220000   0.03088344
  0.24220000   0.02853976
  0.24220000   0.02637398
  0.24220000   0.02437257
  0.24220000   0.02252306
  0.24220000   0.02081391
  0.24240000   0.12019938
  0.24240000   0.11114634
  0.24240000   0.10277640
  0.24240000   0.09503775
  0.24240000   0.08788258
  0.24240000   0.08126674
  0.24240000   0.07514945
  0.24240000   0.06949304
  0.24240000   0.06426271
  0.24240000   0.05942629
  0.24240000   0.05495407
  0.24240000   0.05081859
  0.24240000   0.04699445
  0.24240000   0.04345819
  0.24240000   0.04018811
  0.24240000   0.03716417
  0.24240000   0.03436783
  0.24240000   0.03178193
  0.24240000   0.02939064
  0.24240000   0.02717931
  0.24240000   0.02513438
  0.24240000   0.02324332
  0.24240000   0.02149457
  0.24260000   0.12223447
  0.24260000   0.11310705
  0.24260000   0.10466248
  0.24260000   0.09684942
  0.24260000   0.08962043
  0.24260000   0.08293169
  0.24260000   0.07674269
  0.24260000   0.07101598
  0.24260000   0.06571696
  0.24260000   0.06081361
  0.24260000   0.05627634
  0.24260000   0.05207777
  0.24260000   0.04819258
  0.24260000   0.04459736
  0.24260000   0.04127044
  0.24260000   0.03819178
  0.24260000   0.03534285
  0.24260000   0.03270648
  0.24260000   0.03026681
  0.24260000   0.02800915
  0.24260000   0.02591992
  0.24260000   0.02398656
  0.24260000   0.02219742
  0.24280000   0.12430372
  0.24280000   0.11510205
  0.24280000   0.10658290
  0.24280000   0.09869536
  0.24280000   0.09139240
  0.24280000   0.08463052
  0.24280000   0.07836949
  0.24280000   0.07257211
  0.24280000   0.06720394
  0.24280000   0.06223315
  0.24280000   0.05763027
  0.24280000   0.05336801
  0.24280000   0.04942113
  0.24280000   0.04576627
  0.24280000   0.04238180
  0.24280000   0.03924770
  0.24280000   0.03634543
  0.24280000   0.03365782
  0.24280000   0.03116900
  0.24280000   0.02886425
  0.24280000   0.02672995
  0.24280000   0.02475349
  0.24280000   0.02292319
  0.24300000   0.12640768
  0.24300000   0.11713195
  0.24300000   0.10853827
  0.24300000   0.10057623
  0.24300000   0.09319916
  0.24300000   0.08636392
  0.24300000   0.08003056
  0.24300000   0.07416212
  0.24300000   0.06872437
  0.24300000   0.06368564
  0.24300000   0.05901659
  0.24300000   0.05469005
  0.24300000   0.05068084
  0.24300000   0.04696568
  0.24300000   0.04352296
  0.24300000   0.04033269
  0.24300000   0.03737634
  0.24300000   0.03463674
  0.24300000   0.03209799
  0.24300000   0.02974537
  0.24300000   0.02756521
  0.24300000   0.02554487
  0.24300000   0.02367263
  0.24320000   0.12854692
  0.24320000   0.11919733
  0.24320000   0.11052923
  0.24320000   0.10249266
  0.24320000   0.09504137
  0.24320000   0.08813257
  0.24320000   0.08172660
  0.24320000   0.07578674
  0.24320000   0.07027900
  0.24320000   0.06517184
  0.24320000   0.06043609
  0.24320000   0.05604467
  0.24320000   0.05197251
  0.24320000   0.04819637
  0.24320000   0.04469471
  0.24320000   0.04144755
  0.24320000   0.03843637
  0.24320000   0.03564402
  0.24320000   0.03305458
  0.24320000   0.03065329
  0.24320000   0.02842649
  0.24320000   0.02636147
  0.24320000   0.02444649
  0.24340000   0.13072203
  0.24340000   0.12129880
  0.24340000   0.11255639
  0.24340000   0.10444531
  0.24340000   0.09691972
  0.24340000   0.08993718
  0.24340000   0.08345833
  0.24340000   0.07744673
  0.24340000   0.07186857
  0.24340000   0.06669252
  0.24340000   0.06188953
  0.24340000   0.05743267
  0.24340000   0.05329694
  0.24340000   0.04945916
  0.24340000   0.04589786
  0.24340000   0.04259309
  0.24340000   0.03952635
  0.24340000   0.03668048
  0.24340000   0.03403956
  0.24340000   0.03158883
  0.24340000   0.02931458
  0.24340000   0.02720409
  0.24340000   0.02524557
  0.24360000   0.13293359
  0.24360000   0.12343699
  0.24360000   0.11462041
  0.24360000   0.10643485
  0.24360000   0.09883490
  0.24360000   0.09177846
  0.24360000   0.08522650
  0.24360000   0.07914283
  0.24360000   0.07349386
  0.24360000   0.06824847
  0.24360000   0.06337774
  0.24360000   0.05885485
  0.24360000   0.05465493
  0.24360000   0.05075488
  0.24360000   0.04713325
  0.24360000   0.04377015
  0.24360000   0.04064710
  0.24360000   0.03774695
  0.24360000   0.03505379
  0.24360000   0.03255282
  0.24360000   0.03023032
  0.24360000   0.02807356
  0.24360000   0.02607069
  0.24380000   0.13518219
  0.24380000   0.12561251
  0.24380000   0.11672194
  0.24380000   0.10846197
  0.24380000   0.10078762
  0.24380000   0.09365715
  0.24380000   0.08703186
  0.24380000   0.08087582
  0.24380000   0.07515568
  0.24380000   0.06984049
  0.24380000   0.06490151
  0.24380000   0.06031206
  0.24380000   0.05604735
  0.24380000   0.05208436
  0.24380000   0.04840173
  0.24380000   0.04497959
  0.24380000   0.04179949
  0.24380000   0.03884431
  0.24380000   0.03609811
  0.24380000   0.03354611
  0.24380000   0.03117457
  0.24380000   0.02897072
  0.24380000   0.02692269
  0.24400000   0.13746844
  0.24400000   0.12782600
  0.24400000   0.11886165
  0.24400000   0.11052736
  0.24400000   0.10277860
  0.24400000   0.09557400
  0.24400000   0.08887517
  0.24400000   0.08264648
  0.24400000   0.07685481
  0.24400000   0.07146941
  0.24400000   0.06646170
  0.24400000   0.06180513
  0.24400000   0.05747504
  0.24400000   0.05344849
  0.24400000   0.04970418
  0.24400000   0.04622229
  0.24400000   0.04298441
  0.24400000   0.03997342
  0.24400000   0.03717341
  0.24400000   0.03456959
  0.24400000   0.03214820
  0.24400000   0.02989644
  0.24400000   0.02780244
  0.24420000   0.13979296
  0.24420000   0.13007811
  0.24420000   0.12104021
  0.24420000   0.11263173
  0.24420000   0.10480857
  0.24420000   0.09752976
  0.24420000   0.09075723
  0.24420000   0.08445563
  0.24420000   0.07859209
  0.24420000   0.07313606
  0.24420000   0.06805915
  0.24420000   0.06333495
  0.24420000   0.05893889
  0.24420000   0.05484815
  0.24420000   0.05104149
  0.24420000   0.04749915
  0.24420000   0.04420275
  0.24420000   0.04113521
  0.24420000   0.03828061
  0.24420000   0.03562417
  0.24420000   0.03315212
  0.24420000   0.03085164
  0.24420000   0.02871083
  0.24440000   0.14215636
  0.24440000   0.13236950
  0.24440000   0.12325832
  0.24440000   0.11477580
  0.24440000   0.10687829
  0.24440000   0.09952520
  0.24440000   0.09267882
  0.24440000   0.08630408
  0.24440000   0.08036836
  0.24440000   0.07484132
  0.24440000   0.06969475
  0.24440000   0.06490239
  0.24440000   0.06043981
  0.24440000   0.05628426
  0.24440000   0.05241459
  0.24440000   0.04881110
  0.24440000   0.04545547
  0.24440000   0.04233061
  0.24440000   0.03942065
  0.24440000   0.03671079
  0.24440000   0.03418726
  0.24440000   0.03183724
  0.24440000   0.02964880
  0.24460000   0.14455928
  0.24460000   0.13470083
  0.24460000   0.12551667
  0.24460000   0.11696030
  0.24460000   0.10898851
  0.24460000   0.10156113
  0.24460000   0.09464077
  0.24460000   0.08819268
  0.24460000   0.08218448
  0.24460000   0.07658606
  0.24460000   0.07136940
  0.24460000   0.06650838
  0.24460000   0.06197871
  0.24460000   0.05775775
  0.24460000   0.05382443
  0.24460000   0.05015911
  0.24460000   0.04674350
  0.24460000   0.04356058
  0.24460000   0.04059447
  0.24460000   0.03783040
  0.24460000   0.03525458
  0.24460000   0.03285420
  0.24460000   0.03061728
  0.24480000   0.14700236
  0.24480000   0.13707278
  0.24480000   0.12781597
  0.24480000   0.11918597
  0.24480000   0.11114001
  0.24480000   0.10363833
  0.24480000   0.09664391
  0.24480000   0.09012227
  0.24480000   0.08404132
  0.24480000   0.07837118
  0.24480000   0.07308401
  0.24480000   0.06815385
  0.24480000   0.06355655
  0.24480000   0.05926959
  0.24480000   0.05527197
  0.24480000   0.05154413
  0.24480000   0.04806785
  0.24480000   0.04482611
  0.24480000   0.04180309
  0.24480000   0.03898401
  0.24480000   0.03635509
  0.24480000   0.03390351
  0.24480000   0.03161728
  0.24500000   0.14948626
  0.24500000   0.13948604
  0.24500000   0.13015696
  0.24500000   0.12145357
  0.24500000   0.11333358
  0.24500000   0.10575764
  0.24500000   0.09868907
  0.24500000   0.09209373
  0.24500000   0.08593979
  0.24500000   0.08019760
  0.24500000   0.07483951
  0.24500000   0.06983975
  0.24500000   0.06517430
  0.24500000   0.06082075
  0.24500000   0.05675821
  0.24500000   0.05296719
  0.24500000   0.04942951
  0.24500000   0.04612822
  0.24500000   0.04304751
  0.24500000   0.04017262
  0.24500000   0.03748979
  0.24500000   0.03498618
  0.24500000   0.03264981
  0.24520000   0.15201162
  0.24520000   0.14194131
  0.24520000   0.13254036
  0.24520000   0.12376386
  0.24520000   0.11557002
  0.24520000   0.10791987
  0.24520000   0.10077713
  0.24520000   0.09410796
  0.24520000   0.08788080
  0.24520000   0.08206625
  0.24520000   0.07663688
  0.24520000   0.07156707
  0.24520000   0.06683296
  0.24520000   0.06241225
  0.24520000   0.05828417
  0.24520000   0.05442930
  0.24520000   0.05082953
  0.24520000   0.04746795
  0.24520000   0.04432879
  0.24520000   0.04139731
  0.24520000   0.03865975
  0.24520000   0.03610328
  0.24520000   0.03371591
  0.24540000   0.15457914
  0.24540000   0.14443930
  0.24540000   0.13496692
  0.24540000   0.12611765
  0.24540000   0.11785015
  0.24540000   0.11012590
  0.24540000   0.10290897
  0.24540000   0.09616585
  0.24540000   0.08986529
  0.24540000   0.08397810
  0.24540000   0.07847708
  0.24540000   0.07333680
  0.24540000   0.06853353
  0.24540000   0.06404513
  0.24540000   0.05985090
  0.24540000   0.05593153
  0.24540000   0.05226898
  0.24540000   0.04884638
  0.24540000   0.04564801
  0.24540000   0.04265914
  0.24540000   0.03986604
  0.24540000   0.03725588
  0.24540000   0.03481667
  0.24560000   0.15718948
  0.24560000   0.14698072
  0.24560000   0.13743740
  0.24560000   0.12851571
  0.24560000   0.12017480
  0.24560000   0.11237657
  0.24560000   0.10508547
  0.24560000   0.09826834
  0.24560000   0.09189420
  0.24560000   0.08593413
  0.24560000   0.08036112
  0.24560000   0.07514996
  0.24560000   0.07027707
  0.24560000   0.06572043
  0.24560000   0.06145947
  0.24560000   0.05747497
  0.24560000   0.05374895
  0.24560000   0.05026461
  0.24560000   0.04700627
  0.24560000   0.04395923
  0.24560000   0.04110978
  0.24560000   0.03844511
  0.24560000   0.03595320
  0.24580000   0.15984334
  0.24580000   0.14956632
  0.24580000   0.13995258
  0.24580000   0.13095886
  0.24580000   0.12254481
  0.24580000   0.11467277
  0.24580000   0.10730757
  0.24580000   0.10041637
  0.24580000   0.09396851
  0.24580000   0.08793533
  0.24580000   0.08229003
  0.24580000   0.07700760
  0.24580000   0.07206463
  0.24580000   0.06743925
  0.24580000   0.06311099
  0.24580000   0.05906072
  0.24580000   0.05527056
  0.24580000   0.05172378
  0.24580000   0.04840471
  0.24580000   0.04529873
  0.24580000   0.04239213
  0.24580000   0.03967210
  0.24580000   0.03712666
  0.24600000   0.16254142
  0.24600000   0.15219684
  0.24600000   0.14251324
  0.24600000   0.13344793
  0.24600000   0.12496106
  0.24600000   0.11701540
  0.24600000   0.10957618
  0.24600000   0.10261091
  0.24600000   0.09608922
  0.24600000   0.08998272
  0.24600000   0.08426486
  0.24600000   0.07891080
  0.24600000   0.07389732
  0.24600000   0.06920269
  0.24600000   0.06480657
  0.24600000   0.06068994
  0.24600000   0.05683498
  0.24600000   0.05322505
  0.24600000   0.04984453
  0.24600000   0.04667882
  0.24600000   0.04371426
  0.24600000   0.04093806
  0.24600000   0.03833822
  0.24620000   0.16528443
  0.24620000   0.15487302
  0.24620000   0.14512017
  0.24620000   0.13598376
  0.24620000   0.12742442
  0.24620000   0.11940538
  0.24620000   0.11189226
  0.24620000   0.10485294
  0.24620000   0.09825735
  0.24620000   0.09207736
  0.24620000   0.08628667
  0.24620000   0.08086065
  0.24620000   0.07577626
  0.24620000   0.07101190
  0.24620000   0.06654738
  0.24620000   0.06236378
  0.24620000   0.05844339
  0.24620000   0.05476961
  0.24620000   0.05132690
  0.24620000   0.04810071
  0.24620000   0.04507740
  0.24620000   0.04224419
  0.24620000   0.03958913
  0.24640000   0.16807310
  0.24640000   0.15759564
  0.24640000   0.14777419
  0.24640000   0.13856719
  0.24640000   0.12993577
  0.24640000   0.12184363
  0.24640000   0.11425678
  0.24640000   0.10714346
  0.24640000   0.10047392
  0.24640000   0.09422031
  0.24640000   0.08835657
  0.24640000   0.08285828
  0.24640000   0.07770258
  0.24640000   0.07286804
  0.24640000   0.06833461
  0.24640000   0.06408347
  0.24640000   0.06009701
  0.24640000   0.05635871
  0.24640000   0.05285310
  0.24640000   0.04956566
  0.24640000   0.04648280
  0.24640000   0.04359178
  0.24640000   0.04088063
  0.24660000   0.17090815
  0.24660000   0.16036548
  0.24660000   0.15047612
  0.24660000   0.14119909
  0.24660000   0.13249603
  0.24660000   0.12433110
  0.24660000   0.11667073
  0.24660000   0.10948350
  0.24660000   0.10274000
  0.24660000   0.09641266
  0.24660000   0.09047566
  0.24660000   0.08490482
  0.24660000   0.07967746
  0.24660000   0.07477231
  0.24660000   0.07016946
  0.24660000   0.06585023
  0.24660000   0.06179708
  0.24660000   0.05799360
  0.24660000   0.05442437
  0.24660000   0.05107495
  0.24660000   0.04793176
  0.24660000   0.04498210
  0.24660000   0.04221403
  0.24680000   0.17379034
  0.24680000   0.16318333
  0.24680000   0.15322680
  0.24680000   0.14388034
  0.24680000   0.13510613
  0.24680000   0.12686876
  0.24680000   0.11913510
  0.24680000   0.11187410
  0.24680000   0.10505666
  0.24680000   0.09865552
  0.24680000   0.09264511
  0.24680000   0.08700146
  0.24680000   0.08170210
  0.24680000   0.07672594
  0.24680000   0.07205320
  0.24680000   0.06766533
  0.24680000   0.06354490
  0.24680000   0.05967559
  0.24680000   0.05604205
  0.24680000   0.05262989
  0.24680000   0.04942561
  0.24680000   0.04641650
  0.24680000   0.04359068
  0.24700000   0.17672041
  0.24700000   0.16604998
  0.24700000   0.15602707
  0.24700000   0.14661184
  0.24700000   0.13776699
  0.24700000   0.12945760
  0.24700000   0.12165093
  0.24700000   0.11431633
  0.24700000   0.10742501
  0.24700000   0.10095003
  0.24700000   0.09486606
  0.24700000   0.08914939
  0.24700000   0.08377773
  0.24700000   0.07873017
  0.24700000   0.07398709
  0.24700000   0.06953006
  0.24700000   0.06534179
  0.24700000   0.06140601
  0.24700000   0.05770748
  0.24700000   0.05423187
  0.24700000   0.05096571
  0.24700000   0.04789637
  0.24700000   0.04501196
  0.24720000   0.17969912
  0.24720000   0.16896626
  0.24720000   0.15887780
  0.24720000   0.14939450
  0.24720000   0.14047959
  0.24720000   0.13209861
  0.24720000   0.12421926
  0.24720000   0.11681126
  0.24720000   0.10984617
  0.24720000   0.10329734
  0.24720000   0.09713973
  0.24720000   0.09134984
  0.24720000   0.08590561
  0.24720000   0.08078630
  0.24720000   0.07597245
  0.24720000   0.07144577
  0.24720000   0.06718908
  0.24720000   0.06318623
  0.24720000   0.05942205
  0.24720000   0.05588227
  0.24720000   0.05255349
  0.24720000   0.04942312
  0.24720000   0.04647930
  0.24740000   0.18272726
  0.24740000   0.17193299
  0.24740000   0.16177987
  0.24740000   0.15222925
  0.24740000   0.14324489
  0.24740000   0.13479281
  0.24740000   0.12684116
  0.24740000   0.11936000
  0.24740000   0.11232129
  0.24740000   0.10569865
  0.24740000   0.09946733
  0.24740000   0.09360407
  0.24740000   0.08808702
  0.24740000   0.08289563
  0.24740000   0.07801062
  0.24740000   0.07341382
  0.24740000   0.06908819
  0.24740000   0.06501767
  0.24740000   0.06118718
  0.24740000   0.05758254
  0.24740000   0.05419040
  0.24740000   0.05099821
  0.24740000   0.04799417
  0.24760000   0.18580562
  0.24760000   0.17495101
  0.24760000   0.16473416
  0.24760000   0.15511702
  0.24760000   0.14606388
  0.24760000   0.13754125
  0.24760000   0.12951769
  0.24760000   0.12196369
  0.24760000   0.11485153
  0.24760000   0.10815516
  0.24760000   0.10185011
  0.24760000   0.09591336
  0.24760000   0.09032328
  0.24760000   0.08505953
  0.24760000   0.08010297
  0.24760000   0.07543562
  0.24760000   0.07104052
  0.24760000   0.06690176
  0.24760000   0.06300434
  0.24760000   0.05933416
  0.24760000   0.05587793
  0.24760000   0.05262316
  0.24760000   0.04955809
  0.24780000   0.18893498
  0.24780000   0.17802116
  0.24780000   0.16774159
  0.24780000   0.15805878
  0.24780000   0.14893757
  0.24780000   0.14034497
  0.24780000   0.13224998
  0.24780000   0.12462348
  0.24780000   0.11743810
  0.24780000   0.11066812
  0.24780000   0.10428934
  0.24780000   0.09827902
  0.24780000   0.09261574
  0.24780000   0.08727936
  0.24780000   0.08225093
[truncated: 159,277 more chars]
