# Supplementary material for: Bifurcations of a New Fractional-Order System with a One-Scroll Chaotic Attractor
Source: Hindawi journal article supplement (doi:10.1155/2019/8341514), 2019-01-01
Supplement: f1 [file 8341514.f1.zip › 8341514.f1/a-bifurcationdata/adataq094.dat]

  0.10000000   0.00019146
  0.10000000   0.00013533
  0.10000000   0.00009571
  0.10000000   0.00006773
  0.10000000   0.00004797
  0.10000000   0.00003402
  0.10000000   0.00002417
  0.10000000   0.00001720
  0.10000000   0.00001228
  0.10000000   0.00000880
  0.10000000   0.00000634
  0.10000000   0.00000459
  0.10000000   0.00000336
  0.10000000   0.00000248
  0.10000000   0.00000186
  0.10000000   0.00000141
  0.10000000   0.00000109
  0.10000000   0.00000086
  0.10000000   0.00000070
  0.10000000   0.00000058
  0.10000000   0.00000049
  0.10000000   0.00000042
  0.10000000   0.00000037
  0.10000000   0.00000034
  0.10020000   0.00019458
  0.10020000   0.00013762
  0.10020000   0.00009739
  0.10020000   0.00006896
  0.10020000   0.00004888
  0.10020000   0.00003468
  0.10020000   0.00002465
  0.10020000   0.00001755
  0.10020000   0.00001254
  0.10020000   0.00000899
  0.10020000   0.00000647
  0.10020000   0.00000469
  0.10020000   0.00000343
  0.10020000   0.00000253
  0.10020000   0.00000189
  0.10020000   0.00000144
  0.10020000   0.00000111
  0.10020000   0.00000088
  0.10020000   0.00000071
  0.10020000   0.00000058
  0.10020000   0.00000049
  0.10020000   0.00000043
  0.10020000   0.00000038
  0.10020000   0.00000034
  0.10040000   0.00019775
  0.10040000   0.00013995
  0.10040000   0.00009910
  0.10040000   0.00007021
  0.10040000   0.00004979
  0.10040000   0.00003535
  0.10040000   0.00002514
  0.10040000   0.00001791
  0.10040000   0.00001280
  0.10040000   0.00000918
  0.10040000   0.00000661
  0.10040000   0.00000479
  0.10040000   0.00000350
  0.10040000   0.00000258
  0.10040000   0.00000193
  0.10040000   0.00000146
  0.10040000   0.00000113
  0.10040000   0.00000089
  0.10040000   0.00000072
  0.10040000   0.00000059
  0.10040000   0.00000050
  0.10040000   0.00000043
  0.10040000   0.00000038
  0.10040000   0.00000034
  0.10060000   0.00020097
  0.10060000   0.00014232
  0.10060000   0.00010084
  0.10060000   0.00007149
  0.10060000   0.00005073
  0.10060000   0.00003604
  0.10060000   0.00002564
  0.10060000   0.00001828
  0.10060000   0.00001307
  0.10060000   0.00000937
  0.10060000   0.00000675
  0.10060000   0.00000490
  0.10060000   0.00000358
  0.10060000   0.00000264
  0.10060000   0.00000197
  0.10060000   0.00000149
  0.10060000   0.00000115
  0.10060000   0.00000091
  0.10060000   0.00000073
  0.10060000   0.00000060
  0.10060000   0.00000050
  0.10060000   0.00000043
  0.10060000   0.00000038
  0.10060000   0.00000034
  0.10080000   0.00020424
  0.10080000   0.00014473
  0.10080000   0.00010261
  0.10080000   0.00007279
  0.10080000   0.00005168
  0.10080000   0.00003674
  0.10080000   0.00002615
  0.10080000   0.00001865
  0.10080000   0.00001334
  0.10080000   0.00000957
  0.10080000   0.00000690
  0.10080000   0.00000500
  0.10080000   0.00000365
  0.10080000   0.00000269
  0.10080000   0.00000201
  0.10080000   0.00000152
  0.10080000   0.00000117
  0.10080000   0.00000092
  0.10080000   0.00000074
  0.10080000   0.00000061
  0.10080000   0.00000051
  0.10080000   0.00000044
  0.10080000   0.00000038
  0.10080000   0.00000034
  0.10100000   0.00020756
  0.10100000   0.00014718
  0.10100000   0.00010441
  0.10100000   0.00007412
  0.10100000   0.00005266
  0.10100000   0.00003745
  0.10100000   0.00002667
  0.10100000   0.00001903
  0.10100000   0.00001362
  0.10100000   0.00000977
  0.10100000   0.00000705
  0.10100000   0.00000511
  0.10100000   0.00000373
  0.10100000   0.00000275
  0.10100000   0.00000205
  0.10100000   0.00000155
  0.10100000   0.00000119
  0.10100000   0.00000094
  0.10100000   0.00000075
  0.10100000   0.00000062
  0.10100000   0.00000052
  0.10100000   0.00000044
  0.10100000   0.00000039
  0.10100000   0.00000035
  0.10120000   0.00021094
  0.10120000   0.00014967
  0.10120000   0.00010625
  0.10120000   0.00007547
  0.10120000   0.00005365
  0.10120000   0.00003818
  0.10120000   0.00002720
  0.10120000   0.00001942
  0.10120000   0.00001390
  0.10120000   0.00000998
  0.10120000   0.00000720
  0.10120000   0.00000522
  0.10120000   0.00000381
  0.10120000   0.00000281
  0.10120000   0.00000209
  0.10120000   0.00000158
  0.10120000   0.00000122
  0.10120000   0.00000095
  0.10120000   0.00000076
  0.10120000   0.00000062
  0.10120000   0.00000052
  0.10120000   0.00000045
  0.10120000   0.00000039
  0.10120000   0.00000035
  0.10140000   0.00021438
  0.10140000   0.00015221
  0.10140000   0.00010812
  0.10140000   0.00007684
  0.10140000   0.00005466
  0.10140000   0.00003892
  0.10140000   0.00002775
  0.10140000   0.00001982
  0.10140000   0.00001419
  0.10140000   0.00001019
  0.10140000   0.00000735
  0.10140000   0.00000533
  0.10140000   0.00000389
  0.10140000   0.00000287
  0.10140000   0.00000214
  0.10140000   0.00000161
  0.10140000   0.00000124
  0.10140000   0.00000097
  0.10140000   0.00000077
  0.10140000   0.00000063
  0.10140000   0.00000053
  0.10140000   0.00000045
  0.10140000   0.00000039
  0.10140000   0.00000035
  0.10160000   0.00021787
  0.10160000   0.00015479
  0.10160000   0.00011002
  0.10160000   0.00007824
  0.10160000   0.00005569
  0.10160000   0.00003967
  0.10160000   0.00002830
  0.10160000   0.00002023
  0.10160000   0.00001449
  0.10160000   0.00001041
  0.10160000   0.00000751
  0.10160000   0.00000545
  0.10160000   0.00000398
  0.10160000   0.00000293
  0.10160000   0.00000218
  0.10160000   0.00000165
  0.10160000   0.00000126
  0.10160000   0.00000099
  0.10160000   0.00000079
  0.10160000   0.00000064
  0.10160000   0.00000053
  0.10160000   0.00000046
  0.10160000   0.00000040
  0.10160000   0.00000035
  0.10180000   0.00022142
  0.10180000   0.00015741
  0.10180000   0.00011195
  0.10180000   0.00007967
  0.10180000   0.00005673
  0.10180000   0.00004044
  0.10180000   0.00002887
  0.10180000   0.00002064
  0.10180000   0.00001479
  0.10180000   0.00001063
  0.10180000   0.00000767
  0.10180000   0.00000557
  0.10180000   0.00000407
  0.10180000   0.00000299
  0.10180000   0.00000223
  0.10180000   0.00000168
  0.10180000   0.00000129
  0.10180000   0.00000100
  0.10180000   0.00000080
  0.10180000   0.00000065
  0.10180000   0.00000054
  0.10180000   0.00000046
  0.10180000   0.00000040
  0.10180000   0.00000036
  0.10200000   0.00022502
  0.10200000   0.00016008
  0.10200000   0.00011392
  0.10200000   0.00008112
  0.10200000   0.00005780
  0.10200000   0.00004123
  0.10200000   0.00002944
  0.10200000   0.00002106
  0.10200000   0.00001510
  0.10200000   0.00001086
  0.10200000   0.00000784
  0.10200000   0.00000569
  0.10200000   0.00000415
  0.10200000   0.00000306
  0.10200000   0.00000228
  0.10200000   0.00000171
  0.10200000   0.00000131
  0.10200000   0.00000102
  0.10200000   0.00000081
  0.10200000   0.00000066
  0.10200000   0.00000055
  0.10200000   0.00000047
  0.10200000   0.00000040
  0.10200000   0.00000036
  0.10220000   0.00022869
  0.10220000   0.00016279
  0.10220000   0.00011593
  0.10220000   0.00008260
  0.10220000   0.00005889
  0.10220000   0.00004203
  0.10220000   0.00003003
  0.10220000   0.00002150
  0.10220000   0.00001542
  0.10220000   0.00001109
  0.10220000   0.00000801
  0.10220000   0.00000581
  0.10220000   0.00000424
  0.10220000   0.00000312
  0.10220000   0.00000232
  0.10220000   0.00000175
  0.10220000   0.00000134
  0.10220000   0.00000104
  0.10220000   0.00000083
  0.10220000   0.00000067
  0.10220000   0.00000056
  0.10220000   0.00000047
  0.10220000   0.00000041
  0.10220000   0.00000036
  0.10240000   0.00023241
  0.10240000   0.00016555
  0.10240000   0.00011796
  0.10240000   0.00008410
  0.10240000   0.00006000
  0.10240000   0.00004285
  0.10240000   0.00003063
  0.10240000   0.00002194
  0.10240000   0.00001574
  0.10240000   0.00001133
  0.10240000   0.00000818
  0.10240000   0.00000594
  0.10240000   0.00000434
  0.10240000   0.00000319
  0.10240000   0.00000237
  0.10240000   0.00000179
  0.10240000   0.00000136
  0.10240000   0.00000106
  0.10240000   0.00000084
  0.10240000   0.00000068
  0.10240000   0.00000056
  0.10240000   0.00000048
  0.10240000   0.00000041
  0.10240000   0.00000036
  0.10260000   0.00023620
  0.10260000   0.00016835
  0.10260000   0.00012004
  0.10260000   0.00008564
  0.10260000   0.00006113
  0.10260000   0.00004368
  0.10260000   0.00003125
  0.10260000   0.00002239
  0.10260000   0.00001608
  0.10260000   0.00001157
  0.10260000   0.00000836
  0.10260000   0.00000607
  0.10260000   0.00000443
  0.10260000   0.00000326
  0.10260000   0.00000242
  0.10260000   0.00000182
  0.10260000   0.00000139
  0.10260000   0.00000108
  0.10260000   0.00000085
  0.10260000   0.00000069
  0.10260000   0.00000057
  0.10260000   0.00000048
  0.10260000   0.00000042
  0.10260000   0.00000037
  0.10280000   0.00024005
  0.10280000   0.00017121
  0.10280000   0.00012215
  0.10280000   0.00008720
  0.10280000   0.00006229
  0.10280000   0.00004453
  0.10280000   0.00003187
  0.10280000   0.00002285
  0.10280000   0.00001641
  0.10280000   0.00001182
  0.10280000   0.00000854
  0.10280000   0.00000620
  0.10280000   0.00000453
  0.10280000   0.00000333
  0.10280000   0.00000248
  0.10280000   0.00000186
  0.10280000   0.00000142
  0.10280000   0.00000110
  0.10280000   0.00000087
  0.10280000   0.00000070
  0.10280000   0.00000058
  0.10280000   0.00000049
  0.10280000   0.00000042
  0.10280000   0.00000037
  0.10300000   0.00024396
  0.10300000   0.00017411
  0.10300000   0.00012430
  0.10300000   0.00008879
  0.10300000   0.00006346
  0.10300000   0.00004540
  0.10300000   0.00003251
  0.10300000   0.00002332
  0.10300000   0.00001676
  0.10300000   0.00001208
  0.10300000   0.00000873
  0.10300000   0.00000634
  0.10300000   0.00000463
  0.10300000   0.00000341
  0.10300000   0.00000253
  0.10300000   0.00000190
  0.10300000   0.00000145
  0.10300000   0.00000112
  0.10300000   0.00000088
  0.10300000   0.00000071
  0.10300000   0.00000059
  0.10300000   0.00000049
  0.10300000   0.00000042
  0.10300000   0.00000037
  0.10320000   0.00024794
  0.10320000   0.00017706
  0.10320000   0.00012649
  0.10320000   0.00009041
  0.10320000   0.00006466
  0.10320000   0.00004628
  0.10320000   0.00003316
  0.10320000   0.00002380
  0.10320000   0.00001711
  0.10320000   0.00001234
  0.10320000   0.00000892
  0.10320000   0.00000648
  0.10320000   0.00000473
  0.10320000   0.00000348
  0.10320000   0.00000258
  0.10320000   0.00000194
  0.10320000   0.00000148
  0.10320000   0.00000114
  0.10320000   0.00000090
  0.10320000   0.00000072
  0.10320000   0.00000059
  0.10320000   0.00000050
  0.10320000   0.00000043
  0.10320000   0.00000038
  0.10340000   0.00025198
  0.10340000   0.00018006
  0.10340000   0.00012872
  0.10340000   0.00009206
  0.10340000   0.00006588
  0.10340000   0.00004718
  0.10340000   0.00003383
  0.10340000   0.00002429
  0.10340000   0.00001747
  0.10340000   0.00001260
  0.10340000   0.00000912
  0.10340000   0.00000662
  0.10340000   0.00000484
  0.10340000   0.00000356
  0.10340000   0.00000264
  0.10340000   0.00000198
  0.10340000   0.00000151
  0.10340000   0.00000116
  0.10340000   0.00000092
  0.10340000   0.00000073
  0.10340000   0.00000060
  0.10340000   0.00000051
  0.10340000   0.00000043
  0.10340000   0.00000038
  0.10360000   0.00025608
  0.10360000   0.00018312
  0.10360000   0.00013099
  0.10360000   0.00009374
  0.10360000   0.00006712
  0.10360000   0.00004810
  0.10360000   0.00003451
  0.10360000   0.00002479
  0.10360000   0.00001784
  0.10360000   0.00001287
  0.10360000   0.00000932
  0.10360000   0.00000677
  0.10360000   0.00000495
  0.10360000   0.00000364
  0.10360000   0.00000270
  0.10360000   0.00000202
  0.10360000   0.00000154
  0.10360000   0.00000119
  0.10360000   0.00000093
  0.10360000   0.00000075
  0.10360000   0.00000061
  0.10360000   0.00000051
  0.10360000   0.00000044
  0.10360000   0.00000038
  0.10380000   0.00026026
  0.10380000   0.00018622
  0.10380000   0.00013329
  0.10380000   0.00009545
  0.10380000   0.00006839
  0.10380000   0.00004904
  0.10380000   0.00003520
  0.10380000   0.00002530
  0.10380000   0.00001822
  0.10380000   0.00001315
  0.10380000   0.00000952
  0.10380000   0.00000692
  0.10380000   0.00000506
  0.10380000   0.00000372
  0.10380000   0.00000276
  0.10380000   0.00000207
  0.10380000   0.00000157
  0.10380000   0.00000121
  0.10380000   0.00000095
  0.10380000   0.00000076
  0.10380000   0.00000062
  0.10380000   0.00000052
  0.10380000   0.00000044
  0.10380000   0.00000039
  0.10400000   0.00026450
  0.10400000   0.00018938
  0.10400000   0.00013564
  0.10400000   0.00009719
  0.10400000   0.00006968
  0.10400000   0.00005000
  0.10400000   0.00003591
  0.10400000   0.00002582
  0.10400000   0.00001860
  0.10400000   0.00001343
  0.10400000   0.00000973
  0.10400000   0.00000707
  0.10400000   0.00000517
  0.10400000   0.00000380
  0.10400000   0.00000282
  0.10400000   0.00000211
  0.10400000   0.00000160
  0.10400000   0.00000123
  0.10400000   0.00000097
  0.10400000   0.00000077
  0.10400000   0.00000063
  0.10400000   0.00000052
  0.10400000   0.00000045
  0.10400000   0.00000039
  0.10420000   0.00026881
  0.10420000   0.00019259
  0.10420000   0.00013803
  0.10420000   0.00009897
  0.10420000   0.00007100
  0.10420000   0.00005097
  0.10420000   0.00003663
  0.10420000   0.00002636
  0.10420000   0.00001900
  0.10420000   0.00001372
  0.10420000   0.00000994
  0.10420000   0.00000723
  0.10420000   0.00000528
  0.10420000   0.00000389
  0.10420000   0.00000288
  0.10420000   0.00000216
  0.10420000   0.00000164
  0.10420000   0.00000126
  0.10420000   0.00000098
  0.10420000   0.00000079
  0.10420000   0.00000064
  0.10420000   0.00000053
  0.10420000   0.00000045
  0.10420000   0.00000039
  0.10440000   0.00027320
  0.10440000   0.00019586
  0.10440000   0.00014046
  0.10440000   0.00010077
  0.10440000   0.00007234
  0.10440000   0.00005197
  0.10440000   0.00003737
  0.10440000   0.00002690
  0.10440000   0.00001940
  0.10440000   0.00001402
  0.10440000   0.00001016
  0.10440000   0.00000739
  0.10440000   0.00000540
  0.10440000   0.00000397
  0.10440000   0.00000295
  0.10440000   0.00000220
  0.10440000   0.00000167
  0.10440000   0.00000128
  0.10440000   0.00000100
  0.10440000   0.00000080
  0.10440000   0.00000065
  0.10440000   0.00000054
  0.10440000   0.00000046
  0.10440000   0.00000040
  0.10460000   0.00027765
  0.10460000   0.00019918
  0.10460000   0.00014294
  0.10460000   0.00010261
  0.10460000   0.00007371
  0.10460000   0.00005298
  0.10460000   0.00003812
  0.10460000   0.00002746
  0.10460000   0.00001981
  0.10460000   0.00001432
  0.10460000   0.00001039
  0.10460000   0.00000756
  0.10460000   0.00000553
  0.10460000   0.00000406
  0.10460000   0.00000301
  0.10460000   0.00000225
  0.10460000   0.00000171
  0.10460000   0.00000131
  0.10460000   0.00000102
  0.10460000   0.00000081
  0.10460000   0.00000066
  0.10460000   0.00000055
  0.10460000   0.00000046
  0.10460000   0.00000040
  0.10480000   0.00028218
  0.10480000   0.00020256
  0.10480000   0.00014546
  0.10480000   0.00010449
  0.10480000   0.00007510
  0.10480000   0.00005401
  0.10480000   0.00003888
  0.10480000   0.00002803
  0.10480000   0.00002023
  0.10480000   0.00001463
  0.10480000   0.00001061
  0.10480000   0.00000773
  0.10480000   0.00000565
  0.10480000   0.00000416
  0.10480000   0.00000308
  0.10480000   0.00000230
  0.10480000   0.00000174
  0.10480000   0.00000134
  0.10480000   0.00000104
  0.10480000   0.00000083
  0.10480000   0.00000067
  0.10480000   0.00000055
  0.10480000   0.00000047
  0.10480000   0.00000040
  0.10500000   0.00028678
  0.10500000   0.00020600
  0.10500000   0.00014802
  0.10500000   0.00010640
  0.10500000   0.00007652
  0.10500000   0.00005507
  0.10500000   0.00003967
  0.10500000   0.00002861
  0.10500000   0.00002066
  0.10500000   0.00001495
  0.10500000   0.00001085
  0.10500000   0.00000790
  0.10500000   0.00000578
  0.10500000   0.00000425
  0.10500000   0.00000315
  0.10500000   0.00000235
  0.10500000   0.00000178
  0.10500000   0.00000136
  0.10500000   0.00000106
  0.10500000   0.00000084
  0.10500000   0.00000068
  0.10500000   0.00000056
  0.10500000   0.00000047
  0.10500000   0.00000041
  0.10520000   0.00029146
  0.10520000   0.00020950
  0.10520000   0.00015063
  0.10520000   0.00010834
  0.10520000   0.00007797
  0.10520000   0.00005614
  0.10520000   0.00004046
  0.10520000   0.00002920
  0.10520000   0.00002110
  0.10520000   0.00001528
  0.10520000   0.00001109
  0.10520000   0.00000808
  0.10520000   0.00000591
  0.10520000   0.00000435
  0.10520000   0.00000322
  0.10520000   0.00000241
  0.10520000   0.00000182
  0.10520000   0.00000139
  0.10520000   0.00000108
  0.10520000   0.00000086
  0.10520000   0.00000069
  0.10520000   0.00000057
  0.10520000   0.00000048
  0.10520000   0.00000041
  0.10540000   0.00029621
  0.10540000   0.00021305
  0.10540000   0.00015328
  0.10540000   0.00011032
  0.10540000   0.00007944
  0.10540000   0.00005724
  0.10540000   0.00004128
  0.10540000   0.00002980
  0.10540000   0.00002155
  0.10540000   0.00001561
  0.10540000   0.00001133
  0.10540000   0.00000826
  0.10540000   0.00000604
  0.10540000   0.00000444
  0.10540000   0.00000329
  0.10540000   0.00000246
  0.10540000   0.00000186
  0.10540000   0.00000142
  0.10540000   0.00000110
  0.10540000   0.00000087
  0.10540000   0.00000070
  0.10540000   0.00000058
  0.10540000   0.00000049
  0.10540000   0.00000042
  0.10560000   0.00030105
  0.10560000   0.00021667
  0.10560000   0.00015599
  0.10560000   0.00011234
  0.10560000   0.00008094
  0.10560000   0.00005836
  0.10560000   0.00004211
  0.10560000   0.00003042
  0.10560000   0.00002200
  0.10560000   0.00001595
  0.10560000   0.00001159
  0.10560000   0.00000844
  0.10560000   0.00000618
  0.10560000   0.00000455
  0.10560000   0.00000337
  0.10560000   0.00000251
  0.10560000   0.00000190
  0.10560000   0.00000145
  0.10560000   0.00000113
  0.10560000   0.00000089
  0.10560000   0.00000071
  0.10560000   0.00000059
  0.10560000   0.00000049
  0.10560000   0.00000042
  0.10580000   0.00030596
  0.10580000   0.00022035
  0.10580000   0.00015874
  0.10580000   0.00011439
  0.10580000   0.00008248
  0.10580000   0.00005950
  0.10580000   0.00004296
  0.10580000   0.00003105
  0.10580000   0.00002247
  0.10580000   0.00001629
  0.10580000   0.00001184
  0.10580000   0.00000863
  0.10580000   0.00000632
  0.10580000   0.00000465
  0.10580000   0.00000344
  0.10580000   0.00000257
  0.10580000   0.00000194
  0.10580000   0.00000148
  0.10580000   0.00000115
  0.10580000   0.00000091
  0.10580000   0.00000073
  0.10580000   0.00000060
  0.10580000   0.00000050
  0.10580000   0.00000043
  0.10600000   0.00031095
  0.10600000   0.00022409
  0.10600000   0.00016154
  0.10600000   0.00011649
  0.10600000   0.00008404
  0.10600000   0.00006066
  0.10600000   0.00004383
  0.10600000   0.00003169
  0.10600000   0.00002295
  0.10600000   0.00001665
  0.10600000   0.00001211
  0.10600000   0.00000883
  0.10600000   0.00000646
  0.10600000   0.00000476
  0.10600000   0.00000352
  0.10600000   0.00000263
  0.10600000   0.00000198
  0.10600000   0.00000151
  0.10600000   0.00000117
  0.10600000   0.00000092
  0.10600000   0.00000074
  0.10600000   0.00000061
  0.10600000   0.00000051
  0.10600000   0.00000043
  0.10620000   0.00031602
  0.10620000   0.00022790
  0.10620000   0.00016439
  0.10620000   0.00011862
  0.10620000   0.00008563
  0.10620000   0.00006185
  0.10620000   0.00004471
  0.10620000   0.00003235
  0.10620000   0.00002344
  0.10620000   0.00001701
  0.10620000   0.00001238
  0.10620000   0.00000903
  0.10620000   0.00000661
  0.10620000   0.00000487
  0.10620000   0.00000360
  0.10620000   0.00000269
  0.10620000   0.00000203
  0.10620000   0.00000155
  0.10620000   0.00000120
  0.10620000   0.00000094
  0.10620000   0.00000075
  0.10620000   0.00000061
  0.10620000   0.00000051
  0.10620000   0.00000044
  0.10640000   0.00032118
  0.10640000   0.00023177
  0.10640000   0.00016729
  0.10640000   0.00012079
  0.10640000   0.00008725
  0.10640000   0.00006306
  0.10640000   0.00004561
  0.10640000   0.00003302
  0.10640000   0.00002394
  0.10640000   0.00001738
  0.10640000   0.00001265
  0.10640000   0.00000923
  0.10640000   0.00000676
  0.10640000   0.00000498
  0.10640000   0.00000369
  0.10640000   0.00000275
  0.10640000   0.00000207
  0.10640000   0.00000158
  0.10640000   0.00000122
  0.10640000   0.00000096
  0.10640000   0.00000077
  0.10640000   0.00000062
  0.10640000   0.00000052
  0.10640000   0.00000044
  0.10660000   0.00032642
  0.10660000   0.00023570
  0.10660000   0.00017024
  0.10660000   0.00012300
  0.10660000   0.00008890
  0.10660000   0.00006429
  0.10660000   0.00004653
  0.10660000   0.00003371
  0.10660000   0.00002445
  0.10660000   0.00001776
  0.10660000   0.00001293
  0.10660000   0.00000944
  0.10660000   0.00000692
  0.10660000   0.00000509
  0.10660000   0.00000377
  0.10660000   0.00000281
  0.10660000   0.00000212
  0.10660000   0.00000161
  0.10660000   0.00000125
  0.10660000   0.00000098
  0.10660000   0.00000078
  0.10660000   0.00000063
  0.10660000   0.00000053
  0.10660000   0.00000045
  0.10680000   0.00033175
  0.10680000   0.00023970
  0.10680000   0.00017324
  0.10680000   0.00012525
  0.10680000   0.00009058
  0.10680000   0.00006555
  0.10680000   0.00004747
  0.10680000   0.00003441
  0.10680000   0.00002497
  0.10680000   0.00001815
  0.10680000   0.00001322
  0.10680000   0.00000966
  0.10680000   0.00000708
  0.10680000   0.00000521
  0.10680000   0.00000386
  0.10680000   0.00000288
  0.10680000   0.00000217
  0.10680000   0.00000165
  0.10680000   0.00000127
  0.10680000   0.00000100
  0.10680000   0.00000079
  0.10680000   0.00000064
  0.10680000   0.00000053
  0.10680000   0.00000045
  0.10700000   0.00033716
  0.10700000   0.00024378
  0.10700000   0.00017630
  0.10700000   0.00012754
  0.10700000   0.00009230
  0.10700000   0.00006683
  0.10700000   0.00004843
  0.10700000   0.00003512
  0.10700000   0.00002550
  0.10700000   0.00001855
  0.10700000   0.00001352
  0.10700000   0.00000988
  0.10700000   0.00000724
  0.10700000   0.00000533
  0.10700000   0.00000395
  0.10700000   0.00000294
  0.10700000   0.00000221
  0.10700000   0.00000168
  0.10700000   0.00000130
  0.10700000   0.00000102
  0.10700000   0.00000081
  0.10700000   0.00000066
  0.10700000   0.00000054
  0.10700000   0.00000046
  0.10720000   0.00034266
  0.10720000   0.00024792
  0.10720000   0.00017941
  0.10720000   0.00012987
  0.10720000   0.00009405
  0.10720000   0.00006814
  0.10720000   0.00004941
  0.10720000   0.00003585
  0.10720000   0.00002605
  0.10720000   0.00001895
  0.10720000   0.00001382
  0.10720000   0.00001010
  0.10720000   0.00000741
  0.10720000   0.00000545
  0.10720000   0.00000404
  0.10720000   0.00000301
  0.10720000   0.00000227
  0.10720000   0.00000172
  0.10720000   0.00000133
  0.10720000   0.00000104
  0.10720000   0.00000082
  0.10720000   0.00000067
  0.10720000   0.00000055
  0.10720000   0.00000046
  0.10740000   0.00034826
  0.10740000   0.00025213
  0.10740000   0.00018258
  0.10740000   0.00013225
  0.10740000   0.00009583
  0.10740000   0.00006948
  0.10740000   0.00005040
  0.10740000   0.00003660
  0.10740000   0.00002660
  0.10740000   0.00001937
  0.10740000   0.00001413
  0.10740000   0.00001033
  0.10740000   0.00000758
  0.10740000   0.00000558
  0.10740000   0.00000413
  0.10740000   0.00000308
  0.10740000   0.00000232
  0.10740000   0.00000176
  0.10740000   0.00000135
  0.10740000   0.00000106
  0.10740000   0.00000084
  0.10740000   0.00000068
  0.10740000   0.00000056
  0.10740000   0.00000047
  0.10760000   0.00035394
  0.10760000   0.00025641
  0.10760000   0.00018580
  0.10760000   0.00013467
  0.10760000   0.00009765
  0.10760000   0.00007084
  0.10760000   0.00005142
  0.10760000   0.00003736
  0.10760000   0.00002717
  0.10760000   0.00001979
  0.10760000   0.00001444
  0.10760000   0.00001056
  0.10760000   0.00000775
  0.10760000   0.00000571
  0.10760000   0.00000423
  0.10760000   0.00000315
  0.10760000   0.00000237
  0.10760000   0.00000180
  0.10760000   0.00000138
  0.10760000   0.00000108
  0.10760000   0.00000085
  0.10760000   0.00000069
  0.10760000   0.00000057
  0.10760000   0.00000048
  0.10780000   0.00035972
  0.10780000   0.00026077
  0.10780000   0.00018908
  0.10780000   0.00013714
  0.10780000   0.00009950
  0.10780000   0.00007223
  0.10780000   0.00005246
  0.10780000   0.00003814
  0.10780000   0.00002775
  0.10780000   0.00002023
  0.10780000   0.00001477
  0.10780000   0.00001081
  0.10780000   0.00000793
  0.10780000   0.00000585
  0.10780000   0.00000433
  0.10780000   0.00000323
  0.10780000   0.00000242
  0.10780000   0.00000184
  0.10780000   0.00000141
  0.10780000   0.00000110
  0.10780000   0.00000087
  0.10780000   0.00000070
  0.10780000   0.00000058
  0.10800000   0.00036560
  0.10800000   0.00026520
  0.10800000   0.00019242
  0.10800000   0.00013965
  0.10800000   0.00010139
  0.10800000   0.00007364
  0.10800000   0.00005352
  0.10800000   0.00003893
  0.10800000   0.00002835
  0.10800000   0.00002067
  0.10800000   0.00001510
  0.10800000   0.00001105
  0.10800000   0.00000812
  0.10800000   0.00000598
  0.10800000   0.00000443
  0.10800000   0.00000330
  0.10800000   0.00000248
  0.10800000   0.00000188
  0.10800000   0.00000144
  0.10800000   0.00000112
  0.10800000   0.00000089
  0.10800000   0.00000071
  0.10800000   0.00000059
  0.10820000   0.00037156
  0.10820000   0.00026971
  0.10820000   0.00019581
  0.10820000   0.00014220
  0.10820000   0.00010331
  0.10820000   0.00007508
  0.10820000   0.00005460
  0.10820000   0.00003974
  0.10820000   0.00002895
  0.10820000   0.00002112
  0.10820000   0.00001544
  0.10820000   0.00001131
  0.10820000   0.00000830
  0.10820000   0.00000612
  0.10820000   0.00000454
  0.10820000   0.00000338
  0.10820000   0.00000254
  0.10820000   0.00000192
  0.10820000   0.00000148
  0.10820000   0.00000115
  0.10820000   0.00000091
  0.10820000   0.00000073
  0.10820000   0.00000060
  0.10840000   0.00037763
  0.10840000   0.00027429
  0.10840000   0.00019927
  0.10840000   0.00014481
  0.10840000   0.00010527
  0.10840000   0.00007656
  0.10840000   0.00005571
  0.10840000   0.00004057
  0.10840000   0.00002957
  0.10840000   0.00002159
  0.10840000   0.00001578
  0.10840000   0.00001156
  0.10840000   0.00000850
  0.10840000   0.00000627
  0.10840000   0.00000464
  0.10840000   0.00000346
  0.10840000   0.00000260
  0.10840000   0.00000197
  0.10840000   0.00000151
  0.10840000   0.00000117
  0.10840000   0.00000092
  0.10840000   0.00000074
  0.10840000   0.00000061
  0.10860000   0.00038380
  0.10860000   0.00027895
  0.10860000   0.00020279
  0.10860000   0.00014746
  0.10860000   0.00010726
  0.10860000   0.00007806
  0.10860000   0.00005684
  0.10860000   0.00004141
  0.10860000   0.00003021
  0.10860000   0.00002206
  0.10860000   0.00001614
  0.10860000   0.00001183
  0.10860000   0.00000870
  0.10860000   0.00000641
  0.10860000   0.00000475
  0.10860000   0.00000354
  0.10860000   0.00000266
  0.10860000   0.00000201
  0.10860000   0.00000154
  0.10860000   0.00000120
  0.10860000   0.00000094
  0.10860000   0.00000075
  0.10860000   0.00000062
  0.10880000   0.00039007
  0.10880000   0.00028370
  0.10880000   0.00020637
  0.10880000   0.00015016
  0.10880000   0.00010930
  0.10880000   0.00007959
  0.10880000   0.00005799
  0.10880000   0.00004228
  0.10880000   0.00003085
  0.10880000   0.00002254
  0.10880000   0.00001650
  0.10880000   0.00001210
  0.10880000   0.00000890
  0.10880000   0.00000657
  0.10880000   0.00000487
  0.10880000   0.00000363
  0.10880000   0.00000272
  0.10880000   0.00000206
  0.10880000   0.00000158
  0.10880000   0.00000122
  0.10880000   0.00000096
  0.10880000   0.00000077
  0.10880000   0.00000063
  0.10900000   0.00039644
  0.10900000   0.00028852
  0.10900000   0.00021002
  0.10900000   0.00015291
  0.10900000   0.00011137
  0.10900000   0.00008115
  0.10900000   0.00005916
  0.10900000   0.00004316
  0.10900000   0.00003152
  0.10900000   0.00002304
  0.10900000   0.00001687
  0.10900000   0.00001238
  0.10900000   0.00000911
  0.10900000   0.00000672
  0.10900000   0.00000498
  0.10900000   0.00000371
  0.10900000   0.00000279
  0.10900000   0.00000211
  0.10900000   0.00000161
  0.10900000   0.00000125
  0.10900000   0.00000098
  0.10900000   0.00000078
  0.10900000   0.00000064
  0.10920000   0.00040291
  0.10920000   0.00029342
  0.10920000   0.00021373
  0.10920000   0.00015572
  0.10920000   0.00011349
  0.10920000   0.00008274
  0.10920000   0.00006036
  0.10920000   0.00004406
  0.10920000   0.00003219
  0.10920000   0.00002355
  0.10920000   0.00001725
  0.10920000   0.00001266
  0.10920000   0.00000932
  0.10920000   0.00000688
  0.10920000   0.00000510
  0.10920000   0.00000380
  0.10920000   0.00000285
  0.10920000   0.00000216
  0.10920000   0.00000165
  0.10920000   0.00000128
  0.10920000   0.00000100
  0.10920000   0.00000080
  0.10920000   0.00000065
  0.10940000   0.00040949
  0.10940000   0.00029841
  0.10940000   0.00021751
  0.10940000   0.00015857
  0.10940000   0.00011564
  0.10940000   0.00008437
  0.10940000   0.00006158
  0.10940000   0.00004498
  0.10940000   0.00003288
  0.10940000   0.00002407
  0.10940000   0.00001764
  0.10940000   0.00001295
  0.10940000   0.00000954
  0.10940000   0.00000704
  0.10940000   0.00000522
  0.10940000   0.00000389
  0.10940000   0.00000292
  0.10940000   0.00000221
  0.10940000   0.00000169
  0.10940000   0.00000130
  0.10940000   0.00000102
  0.10940000   0.00000081
  0.10940000   0.00000066
  0.10960000   0.00041618
  0.10960000   0.00030349
  0.10960000   0.00022135
  0.10960000   0.00016148
  0.10960000   0.00011783
  0.10960000   0.00008602
  0.10960000   0.00006283
  0.10960000   0.00004592
  0.10960000   0.00003359
  0.10960000   0.00002460
  0.10960000   0.00001804
  0.10960000   0.00001325
  0.10960000   0.00000976
  0.10960000   0.00000721
  0.10960000   0.00000535
  0.10960000   0.00000399
  0.10960000   0.00000299
  0.10960000   0.00000226
  0.10960000   0.00000173
  0.10960000   0.00000133
  0.10960000   0.00000104
  0.10960000   0.00000083
  0.10960000   0.00000067
  0.10980000   0.00042298
  0.10980000   0.00030865
  0.10980000   0.00022526
  0.10980000   0.00016444
  0.10980000   0.00012007
  0.10980000   0.00008771
  0.10980000   0.00006410
  0.10980000   0.00004688
  0.10980000   0.00003431
  0.10980000   0.00002514
  0.10980000   0.00001844
  0.10980000   0.00001356
  0.10980000   0.00000999
  0.10980000   0.00000738
  0.10980000   0.00000548
  0.10980000   0.00000408
  0.10980000   0.00000306
  0.10980000   0.00000231
  0.10980000   0.00000177
  0.10980000   0.00000136
  0.10980000   0.00000107
  0.10980000   0.00000085
  0.10980000   0.00000068
  0.11000000   0.00042989
  0.11000000   0.00031390
  0.11000000   0.00022924
  0.11000000   0.00016745
  0.11000000   0.00012235
  0.11000000   0.00008943
  0.11000000   0.00006540
  0.11000000   0.00004786
  0.11000000   0.00003505
  0.11000000   0.00002569
  0.11000000   0.00001886
  0.11000000   0.00001387
  0.11000000   0.00001022
  0.11000000   0.00000756
  0.11000000   0.00000561
  0.11000000   0.00000418
  0.11000000   0.00000313
  0.11000000   0.00000237
  0.11000000   0.00000181
  0.11000000   0.00000139
  0.11000000   0.00000109
  0.11000000   0.00000086
  0.11000000   0.00000070
  0.11020000   0.00043692
  0.11020000   0.00031924
  0.11020000   0.00023329
  0.11020000   0.00017052
  0.11020000   0.00012468
  0.11020000   0.00009119
  0.11020000   0.00006673
  0.11020000   0.00004886
  0.11020000   0.00003580
  0.11020000   0.00002626
  0.11020000   0.00001929
  0.11020000   0.00001419
  0.11020000   0.00001046
  0.11020000   0.00000774
  0.11020000   0.00000574
  0.11020000   0.00000428
  0.11020000   0.00000321
  0.11020000   0.00000243
  0.11020000   0.00000185
  0.11020000   0.00000142
  0.11020000   0.00000111
  0.11020000   0.00000088
  0.11020000   0.00000071
  0.11040000   0.00044405
  0.11040000   0.00032467
  0.11040000   0.00023742
  0.11040000   0.00017365
  0.11040000   0.00012704
  0.11040000   0.00009298
  0.11040000   0.00006808
  0.11040000   0.00004988
  0.11040000   0.00003657
  0.11040000   0.00002684
  0.11040000   0.00001972
  0.11040000   0.00001452
  0.11040000   0.00001071
  0.11040000   0.00000792
  0.11040000   0.00000588
  0.11040000   0.00000438
  0.11040000   0.00000329
  0.11040000   0.00000248
  0.11040000   0.00000189
  0.11040000   0.00000146
  0.11040000   0.00000114
  0.11040000   0.00000090
  0.11040000   0.00000072
  0.11060000   0.00045131
  0.11060000   0.00033019
  0.11060000   0.00024161
  0.11060000   0.00017683
  0.11060000   0.00012946
  0.11060000   0.00009481
  0.11060000   0.00006946
  0.11060000   0.00005092
  0.11060000   0.00003736
  0.11060000   0.00002743
  0.11060000   0.00002017
  0.11060000   0.00001485
  0.11060000   0.00001096
  0.11060000   0.00000811
  0.11060000   0.00000602
  0.11060000   0.00000449
  0.11060000   0.00000337
  0.11060000   0.00000254
  0.11060000   0.00000194
  0.11060000   0.00000149
  0.11060000   0.00000116
  0.11060000   0.00000092
  0.11060000   0.00000074
  0.11080000   0.00045868
  0.11080000   0.00033581
  0.11080000   0.00024588
  0.11080000   0.00018008
  0.11080000   0.00013192
  0.11080000   0.00009667
  0.11080000   0.00007087
  0.11080000   0.00005198
  0.11080000   0.00003816
  0.11080000   0.00002804
  0.11080000   0.00002063
  0.11080000   0.00001520
  0.11080000   0.00001122
  0.11080000   0.00000831
  0.11080000   0.00000617
  0.11080000   0.00000460
  0.11080000   0.00000345
  0.11080000   0.00000260
  0.11080000   0.00000198
  0.11080000   0.00000152
  0.11080000   0.00000119
  0.11080000   0.00000094
  0.11080000   0.00000075
  0.11100000   0.00046618
  0.11100000   0.00034152
  0.11100000   0.00025023
  0.11100000   0.00018338
  0.11100000   0.00013442
  0.11100000   0.00009857
  0.11100000   0.00007231
  0.11100000   0.00005307
  0.11100000   0.00003898
  0.11100000   0.00002866
  0.11100000   0.00002109
  0.11100000   0.00001555
  0.11100000   0.00001148
  0.11100000   0.00000850
  0.11100000   0.00000632
  0.11100000   0.00000471
  0.11100000   0.00000353
  0.11100000   0.00000267
  0.11100000   0.00000203
  0.11100000   0.00000156
  0.11100000   0.00000121
  0.11100000   0.00000096
  0.11100000   0.00000077
  0.11120000   0.00047380
  0.11120000   0.00034733
  0.11120000   0.00025466
  0.11120000   0.00018674
  0.11120000   0.00013698
  0.11120000   0.00010050
  0.11120000   0.00007377
  0.11120000   0.00005418
  0.11120000   0.00003982
  0.11120000   0.00002929
  0.11120000   0.00002157
  0.11120000   0.00001591
  0.11120000   0.00001176
  0.11120000   0.00000871
  0.11120000   0.00000647
  0.11120000   0.00000483
  0.11120000   0.00000362
  0.11120000   0.00000273
  0.11120000   0.00000208
  0.11120000   0.00000160
  0.11120000   0.00000124
  0.11120000   0.00000098
  0.11120000   0.00000078
  0.11140000   0.00048154
  0.11140000   0.00035324
  0.11140000   0.00025916
  0.11140000   0.00019017
  0.11140000   0.00013958
  0.11140000   0.00010248
  0.11140000   0.00007527
  0.11140000   0.00005531
  0.11140000   0.00004068
  0.11140000   0.00002994
  0.11140000   0.00002206
  0.11140000   0.00001628
  0.11140000   0.00001203
  0.11140000   0.00000892
  0.11140000   0.00000663
  0.11140000   0.00000495
  0.11140000   0.00000371
  0.11140000   0.00000280
  0.11140000   0.00000213
  0.11140000   0.00000163
  0.11140000   0.00000127
  0.11140000   0.00000100
  0.11140000   0.00000080
  0.11160000   0.00048941
  0.11160000   0.00035925
  0.11160000   0.00026374
  0.11160000   0.00019366
  0.11160000   0.00014223
  0.11160000   0.00010449
  0.11160000   0.00007680
  0.11160000   0.00005647
  0.11160000   0.00004155
  0.11160000   0.00003060
  0.11160000   0.00002256
  0.11160000   0.00001666
  0.11160000   0.00001232
  0.11160000   0.00000913
  0.11160000   0.00000679
  0.11160000   0.00000507
  0.11160000   0.00000380
  0.11160000   0.00000287
  0.11160000   0.00000218
  0.11160000   0.00000167
  0.11160000   0.00000130
  0.11160000   0.00000102
  0.11160000   0.00000081
  0.11180000   0.00049741
  0.11180000   0.00036536
  0.11180000   0.00026841
  0.11180000   0.00019721
  0.11180000   0.00014494
  0.11180000   0.00010655
  0.11180000   0.00007836
  0.11180000   0.00005765
  0.11180000   0.00004245
  0.11180000   0.00003128
  0.11180000   0.00002307
  0.11180000   0.00001704
  0.11180000   0.00001261
  0.11180000   0.00000935
  0.11180000   0.00000696
  0.11180000   0.00000519
  0.11180000   0.00000390
  0.11180000   0.00000294
  0.11180000   0.00000223
  0.11180000   0.00000171
  0.11180000   0.00000133
  0.11180000   0.00000104
  0.11180000   0.00000083
  0.11200000   0.00050554
  0.11200000   0.00037158
  0.11200000   0.00027315
  0.11200000   0.00020083
  0.11200000   0.00014769
  0.11200000   0.00010864
  0.11200000   0.00007995
  0.11200000   0.00005886
  0.11200000   0.00004336
  0.11200000   0.00003197
  0.11200000   0.00002360
  0.11200000   0.00001744
  0.11200000   0.00001291
  0.11200000   0.00000958
  0.11200000   0.00000713
  0.11200000   0.00000532
  0.11200000   0.00000399
  0.11200000   0.00000301
  0.11200000   0.00000229
  0.11200000   0.00000175
  0.11200000   0.00000136
  0.11200000   0.00000106
  0.11200000   0.00000085
  0.11220000   0.00051381
  0.11220000   0.00037790
  0.11220000   0.00027798
  0.11220000   0.00020452
  0.11220000   0.00015050
  0.11220000   0.00011078
  0.11220000   0.00008157
  0.11220000   0.00006010
  0.11220000   0.00004430
  0.11220000   0.00003268
  0.11220000   0.00002413
  0.11220000   0.00001784
  0.11220000   0.00001322
  0.11220000   0.00000981
  0.11220000   0.00000730
  0.11220000   0.00000545
  0.11220000   0.00000409
  0.11220000   0.00000309
  0.11220000   0.00000234
  0.11220000   0.00000180
  0.11220000   0.00000139
  0.11220000   0.00000109
  0.11220000   0.00000086
  0.11240000   0.00052221
  0.11240000   0.00038434
  0.11240000   0.00028290
  0.11240000   0.00020827
  0.11240000   0.00015336
  0.11240000   0.00011296
  0.11240000   0.00008323
  0.11240000   0.00006135
  0.11240000   0.00004525
  0.11240000   0.00003340
  0.11240000   0.00002468
  0.11240000   0.00001826
  0.11240000   0.00001353
  0.11240000   0.00001005
  0.11240000   0.00000748
  0.11240000   0.00000559
  0.11240000   0.00000419
  0.11240000   0.00000316
  0.11240000   0.00000240
  0.11240000   0.00000184
  0.11240000   0.00000142
  0.11240000   0.00000111
  0.11240000   0.00000088
  0.11260000   0.00053075
  0.11260000   0.00039088
  0.11260000   0.00028791
  0.11260000   0.00021210
  0.11260000   0.00015628
  0.11260000   0.00011518
  0.11260000   0.00008492
  0.11260000   0.00006264
  0.11260000   0.00004623
  0.11260000   0.00003414
  0.11260000   0.00002524
  0.11260000   0.00001868
  0.11260000   0.00001385
  0.11260000   0.00001029
  0.11260000   0.00000766
  0.11260000   0.00000573
  0.11260000   0.00000430
  0.11260000   0.00000324
  0.11260000   0.00000246
  0.11260000   0.00000188
  0.11260000   0.00000146
  0.11260000   0.00000114
  0.11260000   0.00000090
  0.11280000   0.00053942
  0.11280000   0.00039753
  0.11280000   0.00029300
  0.11280000   0.00021599
  0.11280000   0.00015925
  0.11280000   0.00011745
  0.11280000   0.00008665
  0.11280000   0.00006395
  0.11280000   0.00004723
  0.11280000   0.00003490
  0.11280000   0.00002582
  0.11280000   0.00001912
  0.11280000   0.00001418
  0.11280000   0.00001054
  0.11280000   0.00000785
  0.11280000   0.00000587
  0.11280000   0.00000440
  0.11280000   0.00000332
  0.11280000   0.00000252
  0.11280000   0.00000193
  0.11280000   0.00000149
  0.11280000   0.00000116
  0.11280000   0.00000092
  0.11300000   0.00054824
  0.11300000   0.00040430
  0.11300000   0.00029818
  0.11300000   0.00021996
  0.11300000   0.00016228
  0.11300000   0.00011976
  0.11300000   0.00008841
  0.11300000   0.00006529
  0.11300000   0.00004825
  0.11300000   0.00003568
  0.11300000   0.00002641
  0.11300000   0.00001957
  0.11300000   0.00001452
  0.11300000   0.00001080
  0.11300000   0.00000805
  0.11300000   0.00000602
  0.11300000   0.00000452
  0.11300000   0.00000341
  0.11300000   0.00000259
  0.11300000   0.00000198
  0.11300000   0.00000153
  0.11300000   0.00000119
  0.11300000   0.00000094
  0.11320000   0.00055721
  0.11320000   0.00041118
  0.11320000   0.00030346
  0.11320000   0.00022399
  0.11320000   0.00016537
  0.11320000   0.00012212
  0.11320000   0.00009021
  0.11320000   0.00006666
  0.11320000   0.00004929
  0.11320000   0.00003647
  0.11320000   0.00002701
  0.11320000   0.00002002
  0.11320000   0.00001487
  0.11320000   0.00001106
  0.11320000   0.00000824
  0.11320000   0.00000617
  0.11320000   0.00000463
  0.11320000   0.00000349
  0.11320000   0.00000265
  0.11320000   0.00000203
  0.11320000   0.00000156
  0.11320000   0.00000122
  0.11320000   0.00000096
  0.11340000   0.00056632
  0.11340000   0.00041818
  0.11340000   0.00030883
  0.11340000   0.00022811
  0.11340000   0.00016852
  0.11340000   0.00012452
  0.11340000   0.00009204
  0.11340000   0.00006806
  0.11340000   0.00005035
  0.11340000   0.00003728
  0.11340000   0.00002762
  0.11340000   0.00002049
  0.11340000   0.00001522
  0.11340000   0.00001133
  0.11340000   0.00000845
  0.11340000   0.00000632
  0.11340000   0.00000475
  0.11340000   0.00000358
  0.11340000   0.00000272
  0.11340000   0.00000208
  0.11340000   0.00000160
  0.11340000   0.00000125
  0.11340000   0.00000098
  0.11360000   0.00057558
  0.11360000   0.00042530
  0.11360000   0.00031430
  0.11360000   0.00023230
  0.11360000   0.00017172
  0.11360000   0.00012697
  0.11360000   0.00009391
  0.11360000   0.00006949
  0.11360000   0.00005144
  0.11360000   0.00003811
  0.11360000   0.00002825
  0.11360000   0.00002097
  0.11360000   0.00001558
  0.11360000   0.00001160
  0.11360000   0.00000866
  0.11360000   0.00000648
  0.11360000   0.00000487
  0.11360000   0.00000367
  0.11360000   0.00000279
  0.11360000   0.00000213
  0.11360000   0.00000164
  0.11360000   0.00000128
  0.11360000   0.00000101
  0.11380000   0.00058499
  0.11380000   0.00043254
  0.11380000   0.00031986
  0.11380000   0.00023656
  0.11380000   0.00017499
  0.11380000   0.00012947
  0.11380000   0.00009582
  0.11380000   0.00007095
  0.11380000   0.00005255
  0.11380000   0.00003895
  0.11380000   0.00002890
  0.11380000   0.00002146
  0.11380000   0.00001596
  0.11380000   0.00001188
  0.11380000   0.00000887
  0.11380000   0.00000664
  0.11380000   0.00000499
  0.11380000   0.00000376
  0.11380000   0.00000286
  0.11380000   0.00000218
  0.11380000   0.00000168
  0.11380000   0.00000131
  0.11380000   0.00000103
  0.11400000   0.00059456
  0.11400000   0.00043991
  0.11400000   0.00032552
  0.11400000   0.00024091
  0.11400000   0.00017832
  0.11400000   0.00013202
  0.11400000   0.00009777
  0.11400000   0.00007244
  0.11400000   0.00005369
  0.11400000   0.00003982
  0.11400000   0.00002956
  0.11400000   0.00002196
  0.11400000   0.00001634
  0.11400000   0.00001217
  0.11400000   0.00000909
  0.11400000   0.00000681
  0.11400000   0.00000511
  0.11400000   0.00000386
  0.11400000   0.00000293
  0.11400000   0.00000224
  0.11400000   0.00000172
  0.11400000   0.00000134
  0.11400000   0.00000105
  0.11420000   0.00060429
  0.11420000   0.00044740
  0.11420000   0.00033128
  0.11420000   0.00024533
  0.11420000   0.00018171
  0.11420000   0.00013462
  0.11420000   0.00009976
  0.11420000   0.00007396
  0.11420000   0.00005485
  0.11420000   0.00004071
  0.11420000   0.00003023
  0.11420000   0.00002247
  0.11420000   0.00001673
  0.11420000   0.00001247
  0.11420000   0.00000932
  0.11420000   0.00000698
  0.11420000   0.00000524
  0.11420000   0.00000396
  0.11420000   0.00000300
  0.11420000   0.00000229
  0.11420000   0.00000176
  0.11420000   0.00000137
  0.11420000   0.00000108
  0.11440000   0.00061417
  0.11440000   0.00045502
  0.11440000   0.00033715
  0.11440000   0.00024984
  0.11440000   0.00018517
  0.11440000   0.00013727
  0.11440000   0.00010179
  0.11440000   0.00007551
  0.11440000   0.00005604
  0.11440000   0.00004161
  0.11440000   0.00003092
  0.11440000   0.00002300
  0.11440000   0.00001713
  0.11440000   0.00001278
  0.11440000   0.00000955
  0.11440000   0.00000715
  0.11440000   0.00000538
  0.11440000   0.00000406
  0.11440000   0.00000308
  0.11440000   0.00000235
  0.11440000   0.00000181
  0.11440000   0.00000140
  0.11440000   0.00000110
  0.11460000   0.00062422
  0.11460000   0.00046277
  0.11460000   0.00034312
  0.11460000   0.00025443
  0.11460000   0.00018870
  0.11460000   0.00013998
  0.11460000   0.00010386
  0.11460000   0.00007709
  0.11460000   0.00005725
  0.11460000   0.00004254
  0.11460000   0.00003163
  0.11460000   0.00002354
  0.11460000   0.00001754
  0.11460000   0.00001309
  0.11460000   0.00000979
  0.11460000   0.00000734
  0.11460000   0.00000552
  0.11460000   0.00000416
  0.11460000   0.00000316
  0.11460000   0.00000241
  0.11460000   0.00000185
  0.11460000   0.00000144
  0.11460000   0.00000113
  0.11480000   0.00063443
  0.11480000   0.00047065
  0.11480000   0.00034919
  0.11480000   0.00025911
  0.11480000   0.00019229
  0.11480000   0.00014274
  0.11480000   0.00010598
  0.11480000   0.00007871
  0.11480000   0.00005849
  0.11480000   0.00004348
  0.11480000   0.00003235
  0.11480000   0.00002409
  0.11480000   0.00001796
  0.11480000   0.00001341
  0.11480000   0.00001003
  0.11480000   0.00000752
  0.11480000   0.00000566
  0.11480000   0.00000427
  0.11480000   0.00000324
  0.11480000   0.00000247
  0.11480000   0.00000190
  0.11480000   0.00000147
  0.11480000   0.00000116
  0.11500000   0.00064480
  0.11500000   0.00047867
  0.11500000   0.00035537
  0.11500000   0.00026387
  0.11500000   0.00019595
  0.11500000   0.00014555
  0.11500000   0.00010814
  0.11500000   0.00008037
  0.11500000   0.00005975
  0.11500000   0.00004445
  0.11500000   0.00003309
  0.11500000   0.00002465
  0.11500000   0.00001839
  0.11500000   0.00001374
  0.11500000   0.00001028
  0.11500000   0.00000771
  0.11500000   0.00000580
  0.11500000   0.00000438
  0.11500000   0.00000332
  0.11500000   0.00000254
  0.11500000   0.00000195
  0.11500000   0.00000151
  0.11500000   0.00000118
  0.11520000   0.00065535
  0.11520000   0.00048682
  0.11520000   0.00036167
  0.11520000   0.00026872
  0.11520000   0.00019969
  0.11520000   0.00014842
  0.11520000   0.00011034
  0.11520000   0.00008206
  0.11520000   0.00006105
  0.11520000   0.00004544
  0.11520000   0.00003385
  0.11520000   0.00002523
  0.11520000   0.00001883
  0.11520000   0.00001407
  0.11520000   0.00001054
  0.11520000   0.00000791
  0.11520000   0.00000595
  0.11520000   0.00000449
  0.11520000   0.00000341
  0.11520000   0.00000260
  0.11520000   0.00000200
  0.11520000   0.00000155
  0.11520000   0.00000121
  0.11540000   0.00066608
  0.11540000   0.00049512
  0.11540000   0.00036807
  0.11540000   0.00027366
  0.11540000   0.00020349
  0.11540000   0.00015134
  0.11540000   0.00011259
  0.11540000   0.00008378
  0.11540000   0.00006237
  0.11540000   0.00004645
  0.11540000   0.00003462
  0.11540000   0.00002583
  0.11540000   0.00001928
  0.11540000   0.00001442
  0.11540000   0.00001080
  0.11540000   0.00000811
  0.11540000   0.00000610
  0.11540000   0.00000461
  0.11540000   0.00000350
  0.11540000   0.00000267
  0.11540000   0.00000205
  0.11540000   0.00000159
  0.11540000   0.00000124
  0.11560000   0.00067697
  0.11560000   0.00050355
  0.11560000   0.00037459
  0.11560000   0.00027868
  0.11560000   0.00020737
  0.11560000   0.00015433
  0.11560000   0.00011488
  0.11560000   0.00008554
  0.11560000   0.00006372
  0.11560000   0.00004749
  0.11560000   0.00003541
  0.11560000   0.00002643
  0.11560000   0.00001975
  0.11560000   0.00001477
  0.11560000   0.00001107
  0.11560000   0.00000831
  0.11560000   0.00000626
  0.11560000   0.00000473
  0.11560000   0.00000359
  0.11560000   0.00000274
  0.11560000   0.00000210
  0.11560000   0.00000163
  0.11560000   0.00000127
  0.11580000   0.00068805
  0.11580000   0.00051213
  0.11580000   0.00038122
  0.11580000   0.00028381
  0.11580000   0.00021132
  0.11580000   0.00015737
  0.11580000   0.00011722
  0.11580000   0.00008734
  0.11580000   0.00006510
  0.11580000   0.00004855
  0.11580000   0.00003623
  0.11580000   0.00002705
  0.11580000   0.00002022
  0.11580000   0.00001514
  0.11580000   0.00001135
  0.11580000   0.00000852
  0.11580000   0.00000642
  0.11580000   0.00000485
  0.11580000   0.00000368
  0.11580000   0.00000281
  0.11580000   0.00000216
  0.11580000   0.00000167
  0.11580000   0.00000130
  0.11600000   0.00069931
  0.11600000   0.00052086
  0.11600000   0.00038797
  0.11600000   0.00028902
  0.11600000   0.00021534
  0.11600000   0.00016047
  0.11600000   0.00011961
  0.11600000   0.00008918
  0.11600000   0.00006651
  0.11600000   0.00004963
  0.11600000   0.00003706
  0.11600000   0.00002769
  0.11600000   0.00002071
  0.11600000   0.00001551
  0.11600000   0.00001163
  0.11600000   0.00000874
  0.11600000   0.00000659
  0.11600000   0.00000498
  0.11600000   0.00000378
  0.11600000   0.00000288
  0.11600000   0.00000221
  0.11600000   0.00000171
  0.11600000   0.00000133
  0.11620000   0.00071075
  0.11620000   0.00052973
  0.11620000   0.00039485
  0.11620000   0.00029434
  0.11620000   0.00021944
  0.11620000   0.00016363
  0.11620000   0.00012204
  0.11620000   0.00009105
  0.11620000   0.00006795
  0.11620000   0.00005074
  0.11620000   0.00003790
  0.11620000   0.00002834
  0.11620000   0.00002121
  0.11620000   0.00001589
  0.11620000   0.00001192
  0.11620000   0.00000896
  0.11620000   0.00000676
  0.11620000   0.00000511
  0.11620000   0.00000388
  0.11620000   0.00000296
  0.11620000   0.00000227
  0.11620000   0.00000175
  0.11620000   0.00000137
  0.11640000   0.00072238
  0.11640000   0.00053876
  0.11640000   0.00040184
  0.11640000   0.00029975
  0.11640000   0.00022363
  0.11640000   0.00016686
  0.11640000   0.00012453
  0.11640000   0.00009297
  0.11640000   0.00006943
  0.11640000   0.00005187
  0.11640000   0.00003877
  0.11640000   0.00002901
  0.11640000   0.00002172
  0.11640000   0.00001628
  0.11640000   0.00001222
  0.11640000   0.00000919
  0.11640000   0.00000693
  0.11640000   0.00000524
  0.11640000   0.00000398
  0.11640000   0.00000304
  0.11640000   0.00000233
  0.11640000   0.00000180
  0.11640000   0.00000140
  0.11660000   0.00073420
  0.11660000   0.00054794
  0.11660000   0.00040896
  0.11660000   0.00030526
  0.11660000   0.00022789
  0.11660000   0.00017015
  0.11660000   0.00012707
  0.11660000   0.00009492
  0.11660000   0.00007093
  0.11660000   0.00005303
  0.11660000   0.00003966
  0.11660000   0.00002969
  0.11660000   0.00002224
  0.11660000   0.00001668
  0.11660000   0.00001253
  0.11660000   0.00000943
  0.11660000   0.00000711
  0.11660000   0.00000538
  0.11660000   0.00000408
  0.11660000   0.00000312
  0.11660000   0.00000239
  0.11660000   0.00000185
  0.11660000   0.00000144
  0.11680000   0.00074622
  0.11680000   0.00055727
  0.11680000   0.00041620
  0.11680000   0.00031087
  0.11680000   0.00023223
  0.11680000   0.00017351
  0.11680000   0.00012966
  0.11680000   0.00009692
  0.11680000   0.00007247
  0.11680000   0.00005421
  0.11680000   0.00004057
  0.11680000   0.00003039
  0.11680000   0.00002278
  0.11680000   0.00001709
  0.11680000   0.00001284
  0.11680000   0.00000967
  0.11680000   0.00000730
  0.11680000   0.00000552
  0.11680000   0.00000419
  0.11680000   0.00000320
  0.11680000   0.00000245
  0.11680000   0.00000189
  0.11680000   0.00000147
  0.11700000   0.00075843
  0.11700000   0.00056677
  0.11700000   0.00042358
  0.11700000   0.00031659
  0.11700000   0.00023666
  0.11700000   0.00017693
  0.11700000   0.00013230
  0.11700000   0.00009896
  0.11700000   0.00007404
  0.11700000   0.00005542
  0.11700000   0.00004150
  0.11700000   0.00003110
  0.11700000   0.00002333
  0.11700000   0.00001751
  0.11700000   0.00001317
  0.11700000   0.00000992
  0.11700000   0.00000749
  0.11700000   0.00000567
  0.11700000   0.00000430
  0.11700000   0.00000328
  0.11700000   0.00000252
  0.11700000   0.00000194
  0.11700000   0.00000151
  0.11720000   0.00077084
  0.11720000   0.00057643
  0.11720000   0.00043108
  0.11720000   0.00032241
  0.11720000   0.00024117
  0.11720000   0.00018042
  0.11720000   0.00013500
  0.11720000   0.00010104
  0.11720000   0.00007565
  0.11720000   0.00005666
  0.11720000   0.00004246
  0.11720000   0.00003183
  0.11720000   0.00002389
  0.11720000   0.00001795
  0.11720000   0.00001350
  0.11720000   0.00001017
  0.11720000   0.00000768
  0.11720000   0.00000581
  0.11720000   0.00000442
  0.11720000   0.00000337
  0.11720000   0.00000258
  0.11720000   0.00000199
  0.11720000   0.00000155
  0.11740000   0.00078346
  0.11740000   0.00058625
  0.11740000   0.00043872
  0.11740000   0.00032834
  0.11740000   0.00024576
  0.11740000   0.00018398
  0.11740000   0.00013775
  0.11740000   0.00010317
  0.11740000   0.00007729
  0.11740000   0.00005792
  0.11740000   0.00004343
  0.11740000   0.00003258
  0.11740000   0.00002447
  0.11740000   0.00001839
  0.11740000   0.00001384
  0.11740000   0.00001043
  0.11740000   0.00000788
  0.11740000   0.00000597
  0.11740000   0.00000453
  0.11740000   0.00000346
  0.11740000   0.00000265
  0.11740000   0.00000205
  0.11740000   0.00000159
  0.11760000   0.00079628
  0.11760000   0.00059625
  0.11760000   0.00044649
  0.11760000   0.00033438
  0.11760000   0.00025045
  0.11760000   0.00018761
  0.11760000   0.00014056
  0.11760000   0.00010534
  0.11760000   0.00007897
  0.11760000   0.00005922
  0.11760000   0.00004443
  0.11760000   0.00003335
  0.11760000   0.00002506
  0.11760000   0.00001884
  0.11760000   0.00001419
  0.11760000   0.00001070
  0.11760000   0.00000809
  0.11760000   0.00000613
  0.11760000   0.00000466
  0.11760000   0.00000355
  0.11760000   0.00000272
  0.11760000   0.00000210
  0.11760000   0.00000163
  0.11780000   0.00080932
  0.11780000   0.00060641
  0.11780000   0.00045441
  0.11780000   0.00034053
  0.11780000   0.00025522
  0.11780000   0.00019131
  0.11780000   0.00014343
  0.11780000   0.00010756
  0.11780000   0.00008068
  0.11780000   0.00006054
  0.11780000   0.00004545
  0.11780000   0.00003414
  0.11780000   0.00002566
  0.11780000   0.00001931
  0.11780000   0.00001455
  0.11780000   0.00001098
  0.11780000   0.00000830
  0.11780000   0.00000629
  0.11780000   0.00000478
  0.11780000   0.00000365
  0.11780000   0.00000280
  0.11780000   0.00000216
  0.11780000   0.00000167
  0.11800000   0.00082257
  0.11800000   0.00061675
  0.11800000   0.00046246
  0.11800000   0.00034680
  0.11800000   0.00026009
  0.11800000   0.00019509
  0.11800000   0.00014636
  0.11800000   0.00010982
  0.11800000   0.00008243
  0.11800000   0.00006189
  0.11800000   0.00004649
  0.11800000   0.00003495
  0.11800000   0.00002628
  0.11800000   0.00001979
  0.11800000   0.00001492
  0.11800000   0.00001126
  0.11800000   0.00000852
  0.11800000   0.00000646
  0.11800000   0.00000491
  0.11800000   0.00000375
  0.11800000   0.00000287
  0.11800000   0.00000221
  0.11800000   0.00000172
  0.11820000   0.00083603
  0.11820000   0.00062726
  0.11820000   0.00047065
  0.11820000   0.00035318
  0.11820000   0.00026505
  0.11820000   0.00019894
  0.11820000   0.00014934
  0.11820000   0.00011214
  0.11820000   0.00008422
  0.11820000   0.00006328
  0.11820000   0.00004756
  0.11820000   0.00003577
  0.11820000   0.00002692
  0.11820000   0.00002028
  0.11820000   0.00001529
  0.11820000   0.00001155
  0.11820000   0.00000874
  0.11820000   0.00000663
  0.11820000   0.00000504
  0.11820000   0.00000385
  0.11820000   0.00000295
  0.11820000   0.00000227
  0.11820000   0.00000176
  0.11840000   0.00084972
  0.11840000   0.00063795
  0.11840000   0.00047900
  0.11840000   0.00035967
  0.11840000   0.00027010
  0.11840000   0.00020286
  0.11840000   0.00015239
  0.11840000   0.00011450
  0.11840000   0.00008605
  0.11840000   0.00006469
  0.11840000   0.00004866
  0.11840000   0.00003661
  0.11840000   0.00002757
  0.11840000   0.00002078
  0.11840000   0.00001568
  0.11840000   0.00001185
  0.11840000   0.00000897
  0.11840000   0.00000680
  0.11840000   0.00000517
  0.11840000   0.00000395
  0.11840000   0.00000303
  0.11840000   0.00000233
  0.11840000   0.00000181
  0.11860000   0.00086363
  0.11860000   0.00064883
  0.11860000   0.00048748
  0.11860000   0.00036629
  0.11860000   0.00027525
  0.11860000   0.00020687
  0.11860000   0.00015550
  0.11860000   0.00011691
  0.11860000   0.00008792
  0.11860000   0.00006614
  0.11860000   0.00004977
  0.11860000   0.00003748
  0.11860000   0.00002824
  0.11860000   0.00002130
  0.11860000   0.00001608
  0.11860000   0.00001215
  0.11860000   0.00000920
  0.11860000   0.00000698
  0.11860000   0.00000531
  0.11860000   0.00000406
  0.11860000   0.00000311
  0.11860000   0.00000240
  0.11860000   0.00000186
  0.11880000   0.00087777
  0.11880000   0.00065989
  0.11880000   0.00049613
  0.11880000   0.00037303
  0.11880000   0.00028050
  0.11880000   0.00021095
  0.11880000   0.00015867
  0.11880000   0.00011937
  0.11880000   0.00008983
  0.11880000   0.00006762
  0.11880000   0.00005092
  0.11880000   0.00003836
  0.11880000   0.00002892
  0.11880000   0.00002182
  0.11880000   0.00001648
  0.11880000   0.00001247
  0.11880000   0.00000944
  0.11880000   0.00000717
  0.11880000   0.00000546
  0.11880000   0.00000417
  0.11880000   0.00000320
  0.11880000   0.00000246
  0.11880000   0.00000191
  0.11900000   0.00089214
  0.11900000   0.00067114
  0.11900000   0.00050492
  0.11900000   0.00037989
  0.11900000   0.00028585
  0.11900000   0.00021512
  0.11900000   0.00016191
  0.11900000   0.00012189
  0.11900000   0.00009178
  0.11900000   0.00006913
  0.11900000   0.00005209
  0.11900000   0.00003927
  0.11900000   0.00002962
  0.11900000   0.00002237
  0.11900000   0.00001690
  0.11900000   0.00001279
  0.11900000   0.00000969
  0.11900000   0.00000736
  0.11900000   0.00000561
  0.11900000   0.00000428
  0.11900000   0.00000328
  0.11900000   0.00000253
  0.11900000   0.00000196
  0.11920000   0.00090675
  0.11920000   0.00068259
  0.11920000   0.00051387
  0.11920000   0.00038689
  0.11920000   0.00029131
  0.11920000   0.00021937
  0.11920000   0.00016522
  0.11920000   0.00012446
  0.11920000   0.00009377
  0.11920000   0.00007068
  0.11920000   0.00005329
  0.11920000   0.00004020
  0.11920000   0.00003034
  0.11920000   0.00002292
  0.11920000   0.00001733
  0.11920000   0.00001312
  0.11920000   0.00000995
  0.11920000   0.00000756
  0.11920000   0.00000576
  0.11920000   0.00000440
  0.11920000   0.00000337
  0.11920000   0.00000260
  0.11920000   0.00000201
  0.11940000   0.00092160
  0.11940000   0.00069423
  0.11940000   0.00052298
  0.11940000   0.00039400
  0.11940000   0.00029686
  0.11940000   0.00022370
  0.11940000   0.00016859
  0.11940000   0.00012708
  0.11940000   0.00009581
  0.11940000   0.00007226
  0.11940000   0.00005452
  0.11940000   0.00004115
  0.11940000   0.00003108
  0.11940000   0.00002349
  0.11940000   0.00001777
  0.11940000   0.00001346
  0.11940000   0.00001021
  0.11940000   0.00000776
  0.11940000   0.00000591
  0.11940000   0.00000452
  0.11940000   0.00000347
  0.11940000   0.00000267
  0.11940000   0.00000207
  0.11960000   0.00093669
  0.11960000   0.00070606
  0.11960000   0.00053225
  0.11960000   0.00040126
  0.11960000   0.00030253
  0.11960000   0.00022812
  0.11960000   0.00017203
  0.11960000   0.00012976
  0.11960000   0.00009790
  0.11960000   0.00007388
  0.11960000   0.00005577
  0.11960000   0.00004212
  0.11960000   0.00003183
  0.11960000   0.00002407
  0.11960000   0.00001822
  0.11960000   0.00001381
  0.11960000   0.00001048
  0.11960000   0.00000797
  0.11960000   0.00000607
  0.11960000   0.00000464
  0.11960000   0.00000356
  0.11960000   0.00000274
  0.11960000   0.00000213
  0.11980000   0.00095203
  0.11980000   0.00071810
  0.11980000   0.00054169
  0.11980000   0.00040864
  0.11980000   0.00030830
  0.11980000   0.00023262
  0.11980000   0.00017554
  0.11980000   0.00013249
  0.11980000   0.00010002
  0.11980000   0.00007553
  0.11980000   0.00005706
  0.11980000   0.00004312
  0.11980000   0.00003261
  0.11980000   0.00002467
  0.11980000   0.00001869
  0.11980000   0.00001417
  0.11980000   0.00001076
  0.11980000   0.00000818
  0.11980000   0.00000624
  0.11980000   0.00000477
  0.11980000   0.00000366
  0.11980000   0.00000282
  0.11980000   0.00000218
  0.12000000   0.00096762
  0.12000000   0.00073035
  0.12000000   0.00055129
  0.12000000   0.00041616
  0.12000000   0.00031418
  0.12000000   0.00023722
  0.12000000   0.00017913
  0.12000000   0.00013529
  0.12000000   0.00010220
  0.12000000   0.00007722
  0.12000000   0.00005837
  0.12000000   0.00004414
  0.12000000   0.00003340
  0.12000000   0.00002529
  0.12000000   0.00001916
  0.12000000   0.00001454
  0.12000000   0.00001104
  0.12000000   0.00000840
  0.12000000   0.00000641
  0.12000000   0.00000490
  0.12000000   0.00000376
  0.12000000   0.00000290
  0.12000000   0.00000224
  0.12020000   0.00098346
  0.12020000   0.00074281
  0.12020000   0.00056107
  0.12020000   0.00042382
  0.12020000   0.00032018
  0.12020000   0.00024190
  0.12020000   0.00018279
  0.12020000   0.00013814
  0.12020000   0.00010442
  0.12020000   0.00007895
  0.12020000   0.00005972
  0.12020000   0.00004518
  0.12020000   0.00003421
  0.12020000   0.00002591
  0.12020000   0.00001965
  0.12020000   0.00001491
  0.12020000   0.00001133
  0.12020000   0.00000863
  0.12020000   0.00000658
  0.12020000   0.00000504
  0.12020000   0.00000386
  0.12020000   0.00000298
  0.12020000   0.00000231
  0.12040000   0.00099957
  0.12040000   0.00075548
  0.12040000   0.00057102
  0.12040000   0.00043163
  0.12040000   0.00032629
  0.12040000   0.00024668
  0.12040000   0.00018652
  0.12040000   0.00014105
  0.12040000   0.00010669
  0.12040000   0.00008072
  0.12040000   0.00006109
  0.12040000   0.00004625
  0.12040000   0.00003504
  0.12040000   0.00002656
  0.12040000   0.00002015
  0.12040000   0.00001530
  0.12040000   0.00001164
  0.12040000   0.00000886
  0.12040000   0.00000676
  0.12040000   0.00000517
  0.12040000   0.00000397
  0.12040000   0.00000306
  0.12040000   0.00000237
  0.12060000   0.00101594
  0.12060000   0.00076836
  0.12060000   0.00058114
  0.12060000   0.00043957
  0.12060000   0.00033251
  0.12060000   0.00025155
  0.12060000   0.00019033
  0.12060000   0.00014403
  0.12060000   0.00010901
  0.12060000   0.00008253
  0.12060000   0.00006250
  0.12060000   0.00004735
  0.12060000   0.00003589
  0.12060000   0.00002722
  0.12060000   0.00002066
  0.12060000   0.00001570
  0.12060000   0.00001194
  0.12060000   0.00000910
  0.12060000   0.00000695
  0.12060000   0.00000532
  0.12060000   0.00000408
  0.12060000   0.00000315
  0.12060000   0.00000244
  0.12080000   0.00103258
  0.12080000   0.00078147
  0.12080000   0.00059145
  0.12080000   0.00044766
  0.12080000   0.00033886
  0.12080000   0.00025652
  0.12080000   0.00019422
  0.12080000   0.00014707
  0.12080000   0.00011138
  0.12080000   0.00008438
  0.12080000   0.00006394
  0.12080000   0.00004847
  0.12080000   0.00003676
  0.12080000   0.00002790
  0.12080000   0.00002119
  0.12080000   0.00001611
  0.12080000   0.00001226
  0.12080000   0.00000935
  0.12080000   0.00000714
  0.12080000   0.00000547
  0.12080000   0.00000420
  0.12080000   0.00000323
  0.12080000   0.00000250
  0.12100000   0.00104949
  0.12100000   0.00079480
  0.12100000   0.00060194
  0.12100000   0.00045591
  0.12100000   0.00034533
  0.12100000   0.00026159
  0.12100000   0.00019818
  0.12100000   0.00015017
  0.12100000   0.00011381
  0.12100000   0.00008627
  0.12100000   0.00006542
  0.12100000   0.00004962
  0.12100000   0.00003766
  0.12100000   0.00002859
  0.12100000   0.00002173
  0.12100000   0.00001653
  0.12100000   0.00001259
  0.12100000   0.00000960
  0.12100000   0.00000733
  0.12100000   0.00000562
  0.12100000   0.00000431
  0.12100000   0.00000333
  0.12100000   0.00000257
  0.12120000   0.00106668
  0.12120000   0.00080835
  0.12120000   0.00061261
  0.12120000   0.00046430
  0.12120000   0.00035192
  0.12120000   0.00026676
  0.12120000   0.00020223
  0.12120000   0.00015334
  0.12120000   0.00011628
  0.12120000   0.00008820
  0.12120000   0.00006692
  0.12120000   0.00005080
  0.12120000   0.00003857
  0.12120000   0.00002931
  0.12120000   0.00002228
  0.12120000   0.00001696
  0.12120000   0.00001292
  0.12120000   0.00000986
  0.12120000   0.00000754
  0.12120000   0.00000577
  0.12120000   0.00000444
  0.12120000   0.00000342
  0.12120000   0.00000265
  0.12140000   0.00108416
  0.12140000   0.00082214
  0.12140000   0.00062348
  0.12140000   0.00047285
  0.12140000   0.00035864
  0.12140000   0.00027203
  0.12140000   0.00020637
  0.12140000   0.00015657
  0.12140000   0.00011881
  0.12140000   0.00009018
  0.12140000   0.00006847
  0.12140000   0.00005200
  0.12140000   0.00003951
  0.12140000   0.00003004
  0.12140000   0.00002285
  0.12140000   0.00001740
  0.12140000   0.00001326
  0.12140000   0.00001013
  0.12140000   0.00000774
  0.12140000   0.00000593
  0.12140000   0.00000456
  0.12140000   0.00000352
  0.12140000   0.00000272
  0.12160000   0.00110191
  0.12160000   0.00083617
  0.12160000   0.00063454
  0.12160000   0.00048156
  0.12160000   0.00036548
  0.12160000   0.00027741
  0.12160000   0.00021058
  0.12160000   0.00015988
  0.12160000   0.00012140
  0.12160000   0.00009220
  0.12160000   0.00007005
  0.12160000   0.00005323
  0.12160000   0.00004047
  0.12160000   0.00003079
  0.12160000   0.00002344
  0.12160000   0.00001786
  0.12160000   0.00001362
  0.12160000   0.00001040
  0.12160000   0.00000796
  0.12160000   0.00000610
  0.12160000   0.00000469
  0.12160000   0.00000362
  0.12160000   0.00000280
  0.12180000   0.00111997
  0.12180000   0.00085043
  0.12180000   0.00064579
  0.12180000   0.00049042
  0.12180000   0.00037246
  0.12180000   0.00028289
  0.12180000   0.00021489
  0.12180000   0.00016325
  0.12180000   0.00012404
  0.12180000   0.00009427
  0.12180000   0.00007166
  0.12180000   0.00005450
  0.12180000   0.00004146
  0.12180000   0.00003156
  0.12180000   0.00002404
  0.12180000   0.00001832
  0.12180000   0.00001398
  0.12180000   0.00001068
  0.12180000   0.00000818
  0.12180000   0.00000627
  0.12180000   0.00000482
  0.12180000   0.00000372
  0.12180000   0.00000288
  0.12200000   0.00113831
  0.12200000   0.00086494
  0.12200000   0.00065725
  0.12200000   0.00049946
  0.12200000   0.00037957
  0.12200000   0.00028848
  0.12200000   0.00021928
  0.12200000   0.00016670
  0.12200000   0.00012674
  0.12200000   0.00009639
  0.12200000   0.00007332
  0.12200000   0.00005579
  0.12200000   0.00004247
  0.12200000   0.00003234
  0.12200000   0.00002465
  0.12200000   0.00001880
  0.12200000   0.00001435
  0.12200000   0.00001097
  0.12200000   0.00000840
  0.12200000   0.00000645
  0.12200000   0.00000496
  0.12200000   0.00000382
  0.12200000   0.00000296
  0.12220000   0.00115696
  0.12220000   0.00087970
  0.12220000   0.00066891
  0.12220000   0.00050865
  0.12220000   0.00038682
  0.12220000   0.00029419
  0.12220000   0.00022376
  0.12220000   0.00017022
  0.12220000   0.00012950
  0.12220000   0.00009855
  0.12220000   0.00007501
  0.12220000   0.00005711
  0.12220000   0.00004350
  0.12220000   0.00003315
  0.12220000   0.00002528
  0.12220000   0.00001929
  0.12220000   0.00001474
  0.12220000   0.00001127
  0.12220000   0.00000863
  0.12220000   0.00000663
  0.12220000   0.00000510
  0.12220000   0.00000393
  0.12220000   0.00000305
  0.12240000   0.00117592
  0.12240000   0.00089471
  0.12240000   0.00068078
  0.12240000   0.00051802
  0.12240000   0.00039420
  0.12240000   0.00030000
  0.12240000   0.00022833
  0.12240000   0.00017381
  0.12240000   0.00013232
  0.12240000   0.00010076
  0.12240000   0.00007674
  0.12240000   0.00005847
  0.12240000   0.00004456
  0.12240000   0.00003398
  0.12240000   0.00002593
  0.12240000   0.00001980
  0.12240000   0.00001513
  0.12240000   0.00001158
  0.12240000   0.00000887
  0.12240000   0.00000681
  0.12240000   0.00000524
  0.12240000   0.00000405
  0.12240000   0.00000313
  0.12260000   0.00119518
  0.12260000   0.00090998
  0.12260000   0.00069285
  0.12260000   0.00052756
  0.12260000   0.00040173
  0.12260000   0.00030593
  0.12260000   0.00023300
  0.12260000   0.00017748
  0.12260000   0.00013521
  0.12260000   0.00010302
  0.12260000   0.00007852
  0.12260000   0.00005986
  0.12260000   0.00004565
  0.12260000   0.00003483
  0.12260000   0.00002659
  0.12260000   0.00002032
  0.12260000   0.00001554
  0.12260000   0.00001189
  0.12260000   0.00000912
  0.12260000   0.00000700
  0.12260000   0.00000539
  0.12260000   0.00000416
  0.12260000   0.00000322
  0.12280000   0.00121477
  0.12280000   0.00092550
  0.12280000   0.00070515
  0.12280000   0.00053728
  0.12280000   0.00040940
  0.12280000   0.00031198
  0.12280000   0.00023777
  0.12280000   0.00018123
  0.12280000   0.00013815
  0.12280000   0.00010533
  0.12280000   0.00008033
  0.12280000   0.00006128
  0.12280000   0.00004676
  0.12280000   0.00003570
  0.12280000   0.00002727
  0.12280000   0.00002085
  0.12280000   0.00001595
  0.12280000   0.00001222
  0.12280000   0.00000937
  0.12280000   0.00000720
  0.12280000   0.00000554
  0.12280000   0.00000428
  0.12280000   0.00000332
  0.12300000   0.00123467
  0.12300000   0.00094130
  0.12300000   0.00071766
  0.12300000   0.00054718
  0.12300000   0.00041722
  0.12300000   0.00031815
  0.12300000   0.00024263
  0.12300000   0.00018505
  0.12300000   0.00014116
  0.12300000   0.00010770
  0.12300000   0.00008219
  0.12300000   0.00006273
  0.12300000   0.00004790
  0.12300000   0.00003659
  0.12300000   0.00002797
  0.12300000   0.00002139
  0.12300000   0.00001638
  0.12300000   0.00001255
  0.12300000   0.00000963
  0.12300000   0.00000740
  0.12300000   0.00000570
  0.12300000   0.00000440
  0.12300000   0.00000341
  0.12320000   0.00125490
  0.12320000   0.00095736
  0.12320000   0.00073039
  0.12320000   0.00055726
  0.12320000   0.00042519
  0.12320000   0.00032444
  0.12320000   0.00024759
  0.12320000   0.00018896
  0.12320000   0.00014424
  0.12320000   0.00011012
  0.12320000   0.00008408
  0.12320000   0.00006422
  0.12320000   0.00004907
  0.12320000   0.00003751
  0.12320000   0.00002869
  0.12320000   0.00002195
  0.12320000   0.00001682
  0.12320000   0.00001289
  0.12320000   0.00000990
  0.12320000   0.00000761
  0.12320000   0.00000587
  0.12320000   0.00000453
  0.12320000   0.00000351
  0.12340000   0.00127546
  0.12340000   0.00097370
  0.12340000   0.00074335
  0.12340000   0.00056752
  0.12340000   0.00043331
  0.12340000   0.00033086
  0.12340000   0.00025265
  0.12340000   0.00019295
  0.12340000   0.00014738
  0.12340000   0.00011259
  0.12340000   0.00008603
  0.12340000   0.00006575
  0.12340000   0.00005027
  0.12340000   0.00003845
  0.12340000   0.00002942
  0.12340000   0.00002253
  0.12340000   0.00001727
  0.12340000   0.00001325
  0.12340000   0.00001017
  0.12340000   0.00000783
  0.12340000   0.00000603
  0.12340000   0.00000466
  0.12340000   0.00000361
  0.12360000   0.00129636
  0.12360000   0.00099031
  0.12360000   0.00075654
  0.12360000   0.00057798
  0.12360000   0.00044159
  0.12360000   0.00033740
  0.12360000   0.00025782
  0.12360000   0.00019703
  0.12360000   0.00015059
  0.12360000   0.00011512
  0.12360000   0.00008802
  0.12360000   0.00006731
  0.12360000   0.00005150
  0.12360000   0.00003941
  0.12360000   0.00003018
  0.12360000   0.00002312
  0.12360000   0.00001773
  0.12360000   0.00001361
  0.12360000   0.00001046
  0.12360000   0.00000805
  0.12360000   0.00000621
  0.12360000   0.00000480
  0.12360000   0.00000372
  0.12380000   0.00131761
  0.12380000   0.00100721
  0.12380000   0.00076997
  0.12380000   0.00058863
  0.12380000   0.00045002
  0.12380000   0.00034407
  0.12380000   0.00026309
  0.12380000   0.00020119
  0.12380000   0.00015387
  0.12380000   0.00011770
  0.12380000   0.00009005
  0.12380000   0.00006891
  0.12380000   0.00005275
  0.12380000   0.00004040
  0.12380000   0.00003095
  0.12380000   0.00002373
  0.12380000   0.00001821
  0.12380000   0.00001398
  0.12380000   0.00001075
  0.12380000   0.00000828
  0.12380000   0.00000638
  0.12380000   0.00000494
  0.12380000   0.00000383
  0.12400000   0.00133920
  0.12400000   0.00102441
  0.12400000   0.00078363
  0.12400000   0.00059947
  0.12400000   0.00045862
  0.12400000   0.00035088
  0.12400000   0.00026847
  0.12400000   0.00020544
  0.12400000   0.00015723
  0.12400000   0.00012035
  0.12400000   0.00009213
  0.12400000   0.00007055
  0.12400000   0.00005404
  0.12400000   0.00004141
  0.12400000   0.00003175
  0.12400000   0.00002435
  0.12400000   0.00001869
  0.12400000   0.00001436
  0.12400000   0.00001105
  0.12400000   0.00000851
  0.12400000   0.00000657
  0.12400000   0.00000508
  0.12400000   0.00000394
  0.12420000   0.00136115
  0.12420000   0.00104189
  0.12420000   0.00079754
  0.12420000   0.00061052
  0.12420000   0.00046738
  0.12420000   0.00035782
  0.12420000   0.00027396
  0.12420000   0.00020978
  0.12420000   0.00016065
  0.12420000   0.00012305
  0.12420000   0.00009426
  0.12420000   0.00007223
  0.12420000   0.00005536
  0.12420000   0.00004245
  0.12420000   0.00003256
  0.12420000   0.00002499
  0.12420000   0.00001920
  0.12420000   0.00001476
  0.12420000   0.00001136
  0.12420000   0.00000875
  0.12420000   0.00000676
  0.12420000   0.00000523
  0.12420000   0.00000405
  0.12440000   0.00138346
  0.12440000   0.00105967
  0.12440000   0.00081169
  0.12440000   0.00062177
  0.12440000   0.00047631
  0.12440000   0.00036490
  0.12440000   0.00027957
  0.12440000   0.00021421
  0.12440000   0.00016416
  0.12440000   0.00012581
  0.12440000   0.00009644
  0.12440000   0.00007395
  0.12440000   0.00005671
  0.12440000   0.00004351
  0.12440000   0.00003340
  0.12440000   0.00002565
  0.12440000   0.00001971
  0.12440000   0.00001516
  0.12440000   0.00001167
  0.12440000   0.00000900
  0.12440000   0.00000695
  0.12440000   0.00000538
  0.12440000   0.00000417
  0.12460000   0.00140613
  0.12460000   0.00107776
  0.12460000   0.00082610
  0.12460000   0.00063323
  0.12460000   0.00048541
  0.12460000   0.00037212
  0.12460000   0.00028529
  0.12460000   0.00021874
  0.12460000   0.00016773
  0.12460000   0.00012864
  0.12460000   0.00009867
  0.12460000   0.00007571
  0.12460000   0.00005810
  0.12460000   0.00004460
  0.12460000   0.00003426
  0.12460000   0.00002632
  0.12460000   0.00002024
  0.12460000   0.00001558
  0.12460000   0.00001200
  0.12460000   0.00000926
  0.12460000   0.00000715
  0.12460000   0.00000554
  0.12460000   0.00000430
  0.12480000   0.00142918
  0.12480000   0.00109616
  0.12480000   0.00084076
  0.12480000   0.00064490
  0.12480000   0.00049468
  0.12480000   0.00037948
  0.12480000   0.00029113
  0.12480000   0.00022336
  0.12480000   0.00017139
  0.12480000   0.00013153
  0.12480000   0.00010096
  0.12480000   0.00007751
  0.12480000   0.00005952
  0.12480000   0.00004572
  0.12480000   0.00003514
  0.12480000   0.00002702
  0.12480000   0.00002079
  0.12480000   0.00001601
  0.12480000   0.00001234
  0.12480000   0.00000952
  0.12480000   0.00000736
  0.12480000   0.00000570
  0.12480000   0.00000442
  0.12500000   0.00145260
  0.12500000   0.00111487
  0.12500000   0.00085569
  0.12500000   0.00065678
  0.12500000   0.00050413
  0.12500000   0.00038699
  0.12500000   0.00029708
  0.12500000   0.00022808
  0.12500000   0.00017513
  0.12500000   0.00013449
  0.12500000   0.00010329
  0.12500000   0.00007935
  0.12500000   0.00006097
  0.12500000   0.00004687
  0.12500000   0.00003604
  0.12500000   0.00002773
  0.12500000   0.00002135
  0.12500000   0.00001645
  0.12500000   0.00001268
  0.12500000   0.00000979
  0.12500000   0.00000757
  0.12500000   0.00000587
  0.12500000   0.00000455
  0.12520000   0.00147641
  0.12520000   0.00113390
  0.12520000   0.00087088
  0.12520000   0.00066889
  0.12520000   0.00051377
  0.12520000   0.00039464
  0.12520000   0.00030316
  0.12520000   0.00023290
  0.12520000   0.00017895
  0.12520000   0.00013751
  0.12520000   0.00010568
  0.12520000   0.00008124
  0.12520000   0.00006247
  0.12520000   0.00004804
  0.12520000   0.00003697
  0.12520000   0.00002846
  0.12520000   0.00002192
  0.12520000   0.00001690
  0.12520000   0.00001304
  0.12520000   0.00001007
  0.12520000   0.00000779
  0.12520000   0.00000604
  0.12520000   0.00000469
  0.12540000   0.00150061
  0.12540000   0.00115326
  0.12540000   0.00088633
  0.12540000   0.00068121
  0.12540000   0.00052359
  0.12540000   0.00040245
  0.12540000   0.00030936
  0.12540000   0.00023783
  0.12540000   0.00018285
  0.12540000   0.00014060
  0.12540000   0.00010813
  0.12540000   0.00008317
  0.12540000   0.00006399
  0.12540000   0.00004925
  0.12540000   0.00003792
  0.12540000   0.00002921
  0.12540000   0.00002251
  0.12540000   0.00001736
  0.12540000   0.00001340
  0.12540000   0.00001036
  0.12540000   0.00000802
  0.12540000   0.00000622
  0.12540000   0.00000483
  0.12560000   0.00152521
  0.12560000   0.00117295
  0.12560000   0.00090207
  0.12560000   0.00069377
  0.12560000   0.00053359
  0.12560000   0.00041042
  0.12560000   0.00031570
  0.12560000   0.00024286
  0.12560000   0.00018684
  0.12560000   0.00014376
  0.12560000   0.00011063
  0.12560000   0.00008515
  0.12560000   0.00006556
  0.12560000   0.00005049
  0.12560000   0.00003889
  0.12560000   0.00002998
  0.12560000   0.00002312
  0.12560000   0.00001784
  0.12560000   0.00001378
  0.12560000   0.00001066
  0.12560000   0.00000825
  0.12560000   0.00000640
  0.12560000   0.00000497
  0.12580000   0.00155021
  0.12580000   0.00119297
  0.12580000   0.00091808
  0.12580000   0.00070656
  0.12580000   0.00054379
  0.12580000   0.00041854
  0.12580000   0.00032216
  0.12580000   0.00024799
  0.12580000   0.00019092
  0.12580000   0.00014699
  0.12580000   0.00011319
  0.12580000   0.00008718
  0.12580000   0.00006716
  0.12580000   0.00005175
  0.12580000   0.00003990
  0.12580000   0.00003077
  0.12580000   0.00002374
  0.12580000   0.00001833
  0.12580000   0.00001417
  0.12580000   0.00001096
  0.12580000   0.00000849
  0.12580000   0.00000659
  0.12580000   0.00000512
  0.12600000   0.00157563
  0.12600000   0.00121334
  0.12600000   0.00093438
  0.12600000   0.00071958
  0.12600000   0.00055418
  0.12600000   0.00042682
  0.12600000   0.00032875
  0.12600000   0.00025323
  0.12600000   0.00019508
  0.12600000   0.00015030
  0.12600000   0.00011581
  0.12600000   0.00008926
  0.12600000   0.00006881
  0.12600000   0.00005305
  0.12600000   0.00004092
  0.12600000   0.00003158
  0.12600000   0.00002438
  0.12600000   0.00001884
  0.12600000   0.00001457
  0.12600000   0.00001127
  0.12600000   0.00000874
  0.12600000   0.00000678
  0.12600000   0.00000527
  0.12620000   0.00160146
  0.12620000   0.00123406
  0.12620000   0.00095097
  0.12620000   0.00073285
  0.12620000   0.00056477
  0.12620000   0.00043527
  0.12620000   0.00033548
  0.12620000   0.00025859
  0.12620000   0.00019934
  0.12620000   0.00015368
  0.12620000   0.00011850
  0.12620000   0.00009138
  0.12620000   0.00007049
  0.12620000   0.00005439
  0.12620000   0.00004198
  0.12620000   0.00003241
  0.12620000   0.00002504
  0.12620000   0.00001936
  0.12620000   0.00001498
  0.12620000   0.00001160
  0.12620000   0.00000899
  0.12620000   0.00000698
  0.12620000   0.00000543
  0.12640000   0.00162771
  0.12640000   0.00125513
  0.12640000   0.00096786
  0.12640000   0.00074636
  0.12640000   0.00057557
  0.12640000   0.00044388
  0.12640000   0.00034235
  0.12640000   0.00026405
  0.12640000   0.00020369
  0.12640000   0.00015714
  0.12640000   0.00012124
  0.12640000   0.00009356
  0.12640000   0.00007221
  0.12640000   0.00005575
  0.12640000   0.00004306
  0.12640000   0.00003327
  0.12640000   0.00002572
  0.12640000   0.00001989
  0.12640000   0.00001540
  0.12640000   0.00001193
  0.12640000   0.00000925
  0.12640000   0.00000719
  0.12640000   0.00000559
  0.12660000   0.00165440
  0.12660000   0.00127656
  0.12660000   0.00098504
  0.12660000   0.00076012
  0.12660000   0.00058657
  0.12660000   0.00045267
  0.12660000   0.00034936
  0.12660000   0.00026964
  0.12660000   0.00020813
  0.12660000   0.00016067
  0.12660000   0.00012405
  0.12660000   0.00009579
  0.12660000   0.00007398
  0.12660000   0.00005715
  0.12660000   0.00004417
  0.12660000   0.00003415
  0.12660000   0.00002641
  0.12660000   0.00002044
  0.12660000   0.00001583
  0.12660000   0.00001227
  0.12660000   0.00000952
  0.12660000   0.00000740
  0.12660000   0.00000576
  0.12680000   0.00168152
  0.12680000   0.00129836
  0.12680000   0.00100253
  0.12680000   0.00077413
  0.12680000   0.00059778
  0.12680000   0.00046163
  0.12680000   0.00035651
  0.12680000   0.00027534
  0.12680000   0.00021267
  0.12680000   0.00016428
  0.12680000   0.00012692
  0.12680000   0.00009807
  0.12680000   0.00007579
  0.12680000   0.00005859
  0.12680000   0.00004531
  0.12680000   0.00003505
  0.12680000   0.00002712
  0.12680000   0.00002100
  0.12680000   0.00001628
  0.12680000   0.00001262
  0.12680000   0.00000980
  0.12680000   0.00000762
  0.12680000   0.00000594
  0.12700000   0.00170909
  0.12700000   0.00132053
  0.12700000   0.00102033
  0.12700000   0.00078840
  0.12700000   0.00060921
  0.12700000   0.00047077
  0.12700000   0.00036381
  0.12700000   0.00028116
  0.12700000   0.00021731
  0.12700000   0.00016798
  0.12700000   0.00012986
  0.12700000   0.00010041
  0.12700000   0.00007765
  0.12700000   0.00006006
  0.12700000   0.00004648
  0.12700000   0.00003597
  0.12700000   0.00002786
  0.12700000   0.00002158
  0.12700000   0.00001674
  0.12700000   0.00001299
  0.12700000   0.00001009
  0.12700000   0.00000785
  0.12700000   0.00000611
  0.12720000   0.00173711
  0.12720000   0.00134308
  0.12720000   0.00103845
  0.12720000   0.00080294
  0.12720000   0.00062086
  0.12720000   0.00048009
  0.12720000   0.00037126
  0.12720000   0.00028711
  0.12720000   0.00022206
  0.12720000   0.00017176
  0.12720000   0.00013287
  0.12720000   0.00010280
  0.12720000   0.00007955
  0.12720000   0.00006157
  0.12720000   0.00004767
  0.12720000   0.00003692
  0.12720000   0.00002861
  0.12720000   0.00002218
  0.12720000   0.00001721
  0.12720000   0.00001336
  0.12720000   0.00001038
  0.12720000   0.00000808
  0.12720000   0.00000630
  0.12740000   0.00176560
  0.12740000   0.00136602
  0.12740000   0.00105689
  0.12740000   0.00081774
  0.12740000   0.00063273
  0.12740000   0.00048959
  0.12740000   0.00037886
  0.12740000   0.00029319
  0.12740000   0.00022690
  0.12740000   0.00017562
  0.12740000   0.00013595
  0.12740000   0.00010525
  0.12740000   0.00008150
  0.12740000   0.00006312
  0.12740000   0.00004890
  0.12740000   0.00003790
  0.12740000   0.00002938
  0.12740000   0.00002279
  0.12740000   0.00001769
  0.12740000   0.00001375
  0.12740000   0.00001069
  0.12740000   0.00000832
  0.12740000   0.00000649
  0.12760000   0.00179455
  0.12760000   0.00138935
  0.12760000   0.00107566
  0.12760000   0.00083282
  0.12760000   0.00064483
  0.12760000   0.00049929
  0.12760000   0.00038661
  0.12760000   0.00029939
  0.12760000   0.00023186
  0.12760000   0.00017958
  0.12760000   0.00013910
  0.12760000   0.00010776
  0.12760000   0.00008350
  0.12760000   0.00006471
  0.12760000   0.00005017
  0.12760000   0.00003890
  0.12760000   0.00003018
  0.12760000   0.00002342
  0.12760000   0.00001819
  0.12760000   0.00001414
  0.12760000   0.00001100
  0.12760000   0.00000857
  0.12760000   0.00000669
  0.12780000   0.00182397
  0.12780000   0.00141307
  0.12780000   0.00109476
  0.12780000   0.00084818
  0.12780000   0.00065715
  0.12780000   0.00050917
  0.12780000   0.00039453
  0.12780000   0.00030572
  0.12780000   0.00023692
  0.12780000   0.00018362
  0.12780000   0.00014232
  0.12780000   0.00011033
  0.12780000   0.00008554
  0.12780000   0.00006634
  0.12780000   0.00005146
  0.12780000   0.00003993
  0.12780000   0.00003100
  0.12780000   0.00002407
  0.12780000   0.00001871
  0.12780000   0.00001455
  0.12780000   0.00001132
  0.12780000   0.00000883
  0.12780000   0.00000689
  0.12800000   0.00185388
  0.12800000   0.00143721
  0.12800000   0.00111421
  0.12800000   0.00086382
  0.12800000   0.00066972
  0.12800000   0.00051925
  0.12800000   0.00040261
  0.12800000   0.00031219
  0.12800000   0.00024209
  0.12800000   0.00018775
  0.12800000   0.00014562
  0.12800000   0.00011296
  0.12800000   0.00008764
  0.12800000   0.00006801
  0.12800000   0.00005279
  0.12800000   0.00004099
  0.12800000   0.00003184
  0.12800000   0.00002474
  0.12800000   0.00001924
  0.12800000   0.00001497
  0.12800000   0.00001166
  0.12800000   0.00000909
  0.12800000   0.00000710
  0.12820000   0.00188428
  0.12820000   0.00146175
  0.12820000   0.00113400
  0.12820000   0.00087975
  0.12820000   0.00068253
  0.12820000   0.00052954
  0.12820000   0.00041086
  0.12820000   0.00031879
  0.12820000   0.00024738
  0.12820000   0.00019198
  0.12820000   0.00014900
  0.12820000   0.00011566
  0.12820000   0.00008979
  0.12820000   0.00006972
  0.12820000   0.00005415
  0.12820000   0.00004207
  0.12820000   0.00003270
  0.12820000   0.00002542
  0.12820000   0.00001978
  0.12820000   0.00001540
  0.12820000   0.00001200
  0.12820000   0.00000936
  0.12820000   0.00000731
  0.12840000   0.00191519
  0.12840000   0.00148672
  0.12840000   0.00115414
  0.12840000   0.00089597
  0.12840000   0.00069558
  0.12840000   0.00054002
  0.12840000   0.00041927
  0.12840000   0.00032554
  0.12840000   0.00025278
  0.12840000   0.00019630
  0.12840000   0.00015245
  0.12840000   0.00011841
  0.12840000   0.00009199
  0.12840000   0.00007148
  0.12840000   0.00005555
  0.12840000   0.00004318
  0.12840000   0.00003358
  0.12840000   0.00002613
  0.12840000   0.00002034
  0.12840000   0.00001584
  0.12840000   0.00001235
  0.12840000   0.00000964
  0.12840000   0.00000753
  0.12860000   0.00194659
  0.12860000   0.00151212
  0.12860000   0.00117464
  0.12860000   0.00091250
  0.12860000   0.00070888
  0.12860000   0.00055072
  0.12860000   0.00042786
  0.12860000   0.00033243
  0.12860000   0.00025830
  0.12860000   0.00020072
  0.12860000   0.00015599
  0.12860000   0.00012124
  0.12860000   0.00009425
  0.12860000   0.00007328
  0.12860000   0.00005698
  0.12860000   0.00004433
  0.12860000   0.00003449
  0.12860000   0.00002685
  0.12860000   0.00002092
  0.12860000   0.00001630
  0.12860000   0.00001272
  0.12860000   0.00000993
  0.12860000   0.00000776
  0.12880000   0.00197852
  0.12880000   0.00153794
  0.12880000   0.00119550
  0.12880000   0.00092933
  0.12880000   0.00072243
  0.12880000   0.00056162
  0.12880000   0.00043662
  0.12880000   0.00033946
  0.12880000   0.00026394
  0.12880000   0.00020524
  0.12880000   0.00015960
  0.12880000   0.00012413
  0.12880000   0.00009656
  0.12880000   0.00007512
  0.12880000   0.00005846
  0.12880000   0.00004550
  0.12880000   0.00003543
  0.12880000   0.00002760
  0.12880000   0.00002151
  0.12880000   0.00001677
  0.12880000   0.00001309
  0.12880000   0.00001023
  0.12880000   0.00000800
  0.12900000   0.00201097
  0.12900000   0.00156422
  0.12900000   0.00121674
  0.12900000   0.00094647
  0.12900000   0.00073625
  0.12900000   0.00057274
  0.12900000   0.00044557
  0.12900000   0.00034665
  0.12900000   0.00026971
  0.12900000   0.00020986
  0.12900000   0.00016330
  0.12900000   0.00012709
  0.12900000   0.00009892
  0.12900000   0.00007701
  0.12900000   0.00005997
  0.12900000   0.00004671
  0.12900000   0.00003639
  0.12900000   0.00002836
  0.12900000   0.00002212
  0.12900000   0.00001726
  0.12900000   0.00001348
  0.12900000   0.00001053
  0.12900000   0.00000824
  0.12920000   0.00204395
  0.12920000   0.00159094
  0.12920000   0.00123835
  0.12920000   0.00096392
  0.12920000   0.00075033
  0.12920000   0.00058409
  0.12920000   0.00045470
  0.12920000   0.00035398
  0.12920000   0.00027560
  0.12920000   0.00021458
  0.12920000   0.00016709
  0.12920000   0.00013013
  0.12920000   0.00010135
  0.12920000   0.00007895
  0.12920000   0.00006152
  0.12920000   0.00004794
  0.12920000   0.00003738
  0.12920000   0.00002915
  0.12920000   0.00002275
  0.12920000   0.00001776
  0.12920000   0.00001388
  0.12920000   0.00001085
  0.12920000   0.00000849
  0.12940000   0.00207747
  0.12940000   0.00161811
  0.12940000   0.00126035
  0.12940000   0.00098170
  0.12940000   0.00076468
  0.12940000   0.00059566
  0.12940000   0.00046401
  0.12940000   0.00036148
  0.12940000   0.00028162
  0.12940000   0.00021941
  0.12940000   0.00017097
  0.12940000   0.00013323
  0.12940000   0.00010384
  0.12940000   0.00008094
  0.12940000   0.00006311
  0.12940000   0.00004921
  0.12940000   0.00003839
  0.12940000   0.00002996
  0.12940000   0.00002339
  0.12940000   0.00001827
  0.12940000   0.00001428
  0.12940000   0.00001118
  0.12940000   0.00000875
  0.12960000   0.00211155
  0.12960000   0.00164576
  0.12960000   0.00128274
  0.12960000   0.00099981
  0.12960000   0.00077931
  0.12960000   0.00060746
  0.12960000   0.00047352
  0.12960000   0.00036913
  0.12960000   0.00028777
  0.12960000   0.00022436
  0.12960000   0.00017493
  0.12960000   0.00013641
  0.12960000   0.00010638
  0.12960000   0.00008298
  0.12960000   0.00006474
  0.12960000   0.00005052
  0.12960000   0.00003943
  0.12960000   0.00003079
  0.12960000   0.00002406
  0.12960000   0.00001880
  0.12960000   0.00001471
  0.12960000   0.00001151
  0.12960000   0.00000902
  0.12980000   0.00214618
  0.12980000   0.00167387
  0.12980000   0.00130553
  0.12980000   0.00101826
  0.12980000   0.00079422
  0.12980000   0.00061949
  0.12980000   0.00048322
  0.12980000   0.00037694
  0.12980000   0.00029405
  0.12980000   0.00022941
  0.12980000   0.00017899
  0.12980000   0.00013967
  0.12980000   0.00010900
  0.12980000   0.00008507
  0.12980000   0.00006641
  0.12980000   0.00005186
  0.12980000   0.00004050
  0.12980000   0.00003165
  0.12980000   0.00002474
  0.12980000   0.00001935
  0.12980000   0.00001514
  0.12980000   0.00001186
  0.12980000   0.00000930
  0.13000000   0.00218139
  0.13000000   0.00170247
  0.13000000   0.00132872
  0.13000000   0.00103704
  0.13000000   0.00080941
  0.13000000   0.00063176
  0.13000000   0.00049312
  0.13000000   0.00038492
  0.13000000   0.00030048
  0.13000000   0.00023458
  0.13000000   0.00018314
  0.13000000   0.00014300
  0.13000000   0.00011167
  0.13000000   0.00008722
  0.13000000   0.00006813
  0.13000000   0.00005323
  0.13000000   0.00004160
  0.13000000   0.00003253
  0.13000000   0.00002544
  0.13000000   0.00001991
  0.13000000   0.00001559
  0.13000000   0.00001222
  0.13000000   0.00000958
  0.13020000   0.00221717
  0.13020000   0.00173156
  0.13020000   0.00135233
  0.13020000   0.00105617
  0.13020000   0.00082489
  0.13020000   0.00064428
  0.13020000   0.00050322
  0.13020000   0.00039307
  0.13020000   0.00030704
  0.13020000   0.00023986
  0.13020000   0.00018739
  0.13020000   0.00014641
  0.13020000   0.00011441
  0.13020000   0.00008942
  0.13020000   0.00006989
  0.13020000   0.00005465
  0.13020000   0.00004274
  0.13020000   0.00003343
  0.13020000   0.00002616
  0.13020000   0.00002049
  0.13020000   0.00001605
  0.13020000   0.00001259
  0.13020000   0.00000988
  0.13040000   0.00225354
  0.13040000   0.00176114
  0.13040000   0.00137635
  0.13040000   0.00107566
  0.13040000   0.00084067
  0.13040000   0.00065704
  0.13040000   0.00051354
  0.13040000   0.00040139
  0.13040000   0.00031375
  0.13040000   0.00024526
  0.13040000   0.00019174
  0.13040000   0.00014991
  0.13040000   0.00011722
  0.13040000   0.00009167
  0.13040000   0.00007170
  0.13040000   0.00005609
  0.13040000   0.00004390
  0.13040000   0.00003436
  0.13040000   0.00002691
  0.13040000   0.00002108
  0.13040000   0.00001653
  0.13040000   0.00001296
  0.13040000   0.00001018
  0.13060000   0.00229051
  0.13060000   0.00179123
  0.13060000   0.00140081
  0.13060000   0.00109550
  0.13060000   0.00085675
  0.13060000   0.00067006
  0.13060000   0.00052406
  0.13060000   0.00040989
  0.13060000   0.00032061
  0.13060000   0.00025079
  0.13060000   0.00019619
  0.13060000   0.00015349
  0.13060000   0.00012010
  0.13060000   0.00009398
  0.13060000   0.00007356
  0.13060000   0.00005758
  0.13060000   0.00004509
  0.13060000   0.00003532
  0.13060000   0.00002767
  0.13060000   0.00002169
  0.13060000   0.00001702
  0.13060000   0.00001336
  0.13060000   0.00001049
  0.13080000   0.00232808
  0.13080000   0.00182184
  0.13080000   0.00142570
  0.13080000   0.00111571
  0.13080000   0.00087315
  0.13080000   0.00068333
  0.13080000   0.00053480
  0.13080000   0.00041857
  0.13080000   0.00032762
  0.13080000   0.00025644
  0.13080000   0.00020074
  0.13080000   0.00015716
  0.13080000   0.00012305
  0.13080000   0.00009635
  0.13080000   0.00007546
  0.13080000   0.00005911
  0.13080000   0.00004632
  0.13080000   0.00003630
  0.13080000   0.00002846
  0.13080000   0.00002232
  0.13080000   0.00001752
  0.13080000   0.00001376
  0.13080000   0.00001082
  0.13100000   0.00236628
  0.13100000   0.00185297
  0.13100000   0.00145103
  0.13100000   0.00113630
  0.13100000   0.00088985
  0.13100000   0.00069687
  0.13100000   0.00054576
  0.13100000   0.00042743
  0.13100000   0.00033478
  0.13100000   0.00026222
  0.13100000   0.00020540
  0.13100000   0.00016091
  0.13100000   0.00012607
  0.13100000   0.00009878
  0.13100000   0.00007741
  0.13100000   0.00006068
  0.13100000   0.00004757
  0.13100000   0.00003731
  0.13100000   0.00002927
  0.13100000   0.00002297
  0.13100000   0.00001804
  0.13100000   0.00001418
  0.13100000   0.00001115
  0.13120000   0.00240510
  0.13120000   0.00188463
  0.13120000   0.00147681
  0.13120000   0.00115726
  0.13120000   0.00090688
  0.13120000   0.00071068
  0.13120000   0.00055695
  0.13120000   0.00043648
  0.13120000   0.00034209
  0.13120000   0.00026813
  0.13120000   0.00021017
  0.13120000   0.00016475
  0.13120000   0.00012916
  0.13120000   0.00010127
  0.13120000   0.00007942
  0.13120000   0.00006229
  0.13120000   0.00004887
  0.13120000   0.00003835
  0.13120000   0.00003010
  0.13120000   0.00002364
  0.13120000   0.00001858
  0.13120000   0.00001460
  0.13120000   0.00001149
  0.13140000   0.00244456
  0.13140000   0.00191683
  0.13140000   0.00150306
  0.13140000   0.00117862
  0.13140000   0.00092423
  0.13140000   0.00072476
  0.13140000   0.00056836
  0.13140000   0.00044573
  0.13140000   0.00034957
  0.13140000   0.00027417
  0.13140000   0.00021505
  0.13140000   0.00016869
  0.13140000   0.00013234
  0.13140000   0.00010383
  0.13140000   0.00008148
  0.13140000   0.00006395
  0.13140000   0.00005020
  0.13140000   0.00003942
  0.13140000   0.00003096
  0.13140000   0.00002433
  0.13140000   0.00001913
  0.13140000   0.00001505
  0.13140000   0.00001185
  0.13160000   0.00248466
  0.13160000   0.00194959
  0.13160000   0.00152977
  0.13160000   0.00120037
  0.13160000   0.00094191
  0.13160000   0.00073912
  0.13160000   0.00058001
  0.13160000   0.00045517
  0.13160000   0.00035721
  0.13160000   0.00028035
  0.13160000   0.00022004
  0.13160000   0.00017272
  0.13160000   0.00013559
  0.13160000   0.00010645
  0.13160000   0.00008359
  0.13160000   0.00006564
  0.13160000   0.00005156
  0.13160000   0.00004051
  0.13160000   0.00003184
  0.13160000   0.00002504
  0.13160000   0.00001970
  0.13160000   0.00001550
  0.13160000   0.00001221
  0.13180000   0.00252543
  0.13180000   0.00198291
  0.13180000   0.00155695
  0.13180000   0.00122252
  0.13180000   0.00095994
  0.13180000   0.00075377
  0.13180000   0.00059190
  0.13180000   0.00046481
  0.13180000   0.00036502
  0.13180000   0.00028667
  0.13180000   0.00022515
  0.13180000   0.00017684
  0.13180000   0.00013892
  0.13180000   0.00010914
  0.13180000   0.00008575
  0.13180000   0.00006739
  0.13180000   0.00005297
  0.13180000   0.00004164
  0.13180000   0.00003275
  0.13180000   0.00002577
  0.13180000   0.00002028
  0.13180000   0.00001597
  0.13180000   0.00001259
  0.13200000   0.00256687
  0.13200000   0.00201679
  0.13200000   0.00158462
  0.13200000   0.00124508
  0.13200000   0.00097830
  0.13200000   0.00076871
  0.13200000   0.00060403
  0.13200000   0.00047465
  0.13200000   0.00037300
  0.13200000   0.00029313
  0.13200000   0.00023038
  0.13200000   0.00018107
  0.13200000   0.00014233
  0.13200000   0.00011189
  0.13200000   0.00008797
  0.13200000   0.00006918
  0.13200000   0.00005441
  0.13200000   0.00004280
  0.13200000   0.00003368
  0.13200000   0.00002652
  0.13200000   0.00002088
  0.13200000   0.00001646
  0.13200000   0.00001298
  0.13220000   0.00260898
  0.13220000   0.00205126
  0.13220000   0.00161278
  0.13220000   0.00126805
  0.13220000   0.00099703
  0.13220000   0.00078394
  0.13220000   0.00061642
  0.13220000   0.00048471
  0.13220000   0.00038115
  0.13220000   0.00029974
  0.13220000   0.00023573
  0.13220000   0.00018540
  0.13220000   0.00014583
  0.13220000   0.00011471
  0.13220000   0.00009025
  0.13220000   0.00007102
  0.13220000   0.00005589
  0.13220000   0.00004400
  0.13220000   0.00003464
  0.13220000   0.00002729
  0.13220000   0.00002151
  0.13220000   0.00001696
  0.13220000   0.00001338
  0.13240000   0.00265179
  0.13240000   0.00208632
  0.13240000   0.00164145
  0.13240000   0.00129145
  0.13240000   0.00101611
  0.13240000   0.00079948
  0.13240000   0.00062905
  0.13240000   0.00049497
  0.13240000   0.00038949
  0.13240000   0.00030649
  0.13240000   0.00024120
  0.13240000   0.00018983
  0.13240000   0.00014941
  0.13240000   0.00011761
  0.13240000   0.00009259
  0.13240000   0.00007290
  0.13240000   0.00005741
  0.13240000   0.00004522
  0.13240000   0.00003563
  0.13240000   0.00002809
  0.13240000   0.00002215
  0.13240000   0.00001747
  0.13240000   0.00001379
  0.13260000   0.00269531
  0.13260000   0.00212198
  0.13260000   0.00167062
  0.13260000   0.00131529
  0.13260000   0.00103555
  0.13260000   0.00081533
  0.13260000   0.00064195
  0.13260000   0.00050546
  0.13260000   0.00039800
  0.13260000   0.00031340
  0.13260000   0.00024680
  0.13260000   0.00019436
  0.13260000   0.00015308
  0.13260000   0.00012058
  0.13260000   0.00009499
  0.13260000   0.00007484
  0.13260000   0.00005898
  0.13260000   0.00004649
  0.13260000   0.00003665
  0.13260000   0.00002890
  0.13260000   0.00002280
  0.13260000   0.00001800
  0.13260000   0.00001422
  0.13280000   0.00273954
  0.13280000   0.00215824
  0.13280000   0.00170031
  0.13280000   0.00133956
  0.13280000   0.00105537
  0.13280000   0.00083149
  0.13280000   0.00065511
  0.13280000   0.00051617
  0.13280000   0.00040670
  0.13280000   0.00032047
  0.13280000   0.00025253
  0.13280000   0.00019901
  0.13280000   0.00015684
  0.13280000   0.00012362
  0.13280000   0.00009745
  0.13280000   0.00007683
  0.13280000   0.00006058
  0.13280000   0.00004778
  0.13280000   0.00003770
  0.13280000   0.00002975
  0.13280000   0.00002348
  0.13280000   0.00001855
  0.13280000   0.00001466
  0.13300000   0.00278449
  0.13300000   0.00219513
  0.13300000   0.00173053
  0.13300000   0.00136429
  0.13300000   0.00107557
  0.13300000   0.00084797
  0.13300000   0.00066854
  0.13300000   0.00052710
  0.13300000   0.00041560
  0.13300000   0.00032769
  0.13300000   0.00025840
  0.13300000   0.00020377
  0.13300000   0.00016070
  0.13300000   0.00012675
  0.13300000   0.00009998
  0.13300000   0.00007887
  0.13300000   0.00006223
  0.13300000   0.00004912
  0.13300000   0.00003877
  0.13300000   0.00003062
  0.13300000   0.00002418
  0.13300000   0.00001911
  0.13300000   0.00001511
  0.13320000   0.00283018
  0.13320000   0.00223265
  0.13320000   0.00176129
  0.13320000   0.00138947
  0.13320000   0.00109616
  0.13320000   0.00086478
  0.13320000   0.00068225
  0.13320000   0.00053827
  0.13320000   0.00042469
  0.13320000   0.00033508
  0.13320000   0.00026440
  0.13320000   0.00020864
  0.13320000   0.00016465
  0.13320000   0.00012995
  0.13320000   0.00010257
  0.13320000   0.00008097
  0.13320000   0.00006393
  0.13320000   0.00005049
  0.13320000   0.00003988
  0.13320000   0.00003151
  0.13320000   0.00002490
  0.13320000   0.00001969
  0.13320000   0.00001558
  0.13340000   0.00287663
  0.13340000   0.00227081
  0.13340000   0.00179260
  0.13340000   0.00141511
  0.13340000   0.00111714
  0.13340000   0.00088192
  0.13340000   0.00069624
  0.13340000   0.00054967
  0.13340000   0.00043397
  0.13340000   0.00034264
  0.13340000   0.00027054
  0.13340000   0.00021363
  0.13340000   0.00016870
  0.13340000   0.00013323
  0.13340000   0.00010523
  0.13340000   0.00008312
  0.13340000   0.00006567
  0.13340000   0.00005189
  0.13340000   0.00004102
  0.13340000   0.00003243
  0.13340000   0.00002565
  0.13340000   0.00002029
  0.13340000   0.00001606
  0.13360000   0.00292384
  0.13360000   0.00230963
  0.13360000   0.00182447
  0.13360000   0.00144124
  0.13360000   0.00113852
  0.13360000   0.00089940
  0.13360000   0.00071052
  0.13360000   0.00056132
  0.13360000   0.00044346
  0.13360000   0.00035037
  0.13360000   0.00027683
  0.13360000   0.00021873
  0.13360000   0.00017284
  0.13360000   0.00013659
  0.13360000   0.00010796
  0.13360000   0.00008533
  0.13360000   0.00006746
  0.13360000   0.00005334
  0.13360000   0.00004219
  0.13360000   0.00003338
  0.13360000   0.00002641
  0.13360000   0.00002091
  0.13360000   0.00001656
  0.13380000   0.00297182
  0.13380000   0.00234911
  0.13380000   0.00185690
  0.13380000   0.00146784
  0.13380000   0.00116031
  0.13380000   0.00091723
  0.13380000   0.00072509
  0.13380000   0.00057321
  0.13380000   0.00045316
  0.13380000   0.00035827
  0.13380000   0.00028326
  0.13380000   0.00022396
  0.13380000   0.00017709
  0.13380000   0.00014004
  0.13380000   0.00011076
  0.13380000   0.00008760
  0.13380000   0.00006930
  0.13380000   0.00005483
  0.13380000   0.00004339
  0.13380000   0.00003435
  0.13380000   0.00002720
  0.13380000   0.00002155
  0.13380000   0.00001708
  0.13400000   0.00302060
  0.13400000   0.00238927
  0.13400000   0.00188991
  0.13400000   0.00149493
  0.13400000   0.00118252
  0.13400000   0.00093542
  0.13400000   0.00073996
  0.13400000   0.00058536
  0.13400000   0.00046307
  0.13400000   0.00036635
  0.13400000   0.00028984
  0.13400000   0.00022932
  0.13400000   0.00018145
  0.13400000   0.00014358
  0.13400000   0.00011363
  0.13400000   0.00008994
  0.13400000   0.00007119
  0.13400000   0.00005636
  0.13400000   0.00004463
  0.13400000   0.00003535
  0.13400000   0.00002801
  0.13400000   0.00002220
  0.13400000   0.00001761
  0.13420000   0.00307017
  0.13420000   0.00243011
  0.13420000   0.00192351
  0.13420000   0.00152253
  0.13420000   0.00120516
  0.13420000   0.00095396
  0.13420000   0.00075514
  0.13420000   0.00059776
  0.13420000   0.00047320
  0.13420000   0.00037461
  0.13420000   0.00029657
  0.13420000   0.00023480
  0.13420000   0.00018591
  0.13420000   0.00014721
  0.13420000   0.00011658
  0.13420000   0.00009233
  0.13420000   0.00007313
  0.13420000   0.00005794
  0.13420000   0.00004591
  0.13420000   0.00003639
  0.13420000   0.00002885
  0.13420000   0.00002288
  0.13420000   0.00001816
  0.13440000   0.00312056
  0.13440000   0.00247165
  0.13440000   0.00195770
  0.13440000   0.00155064
  0.13440000   0.00122823
  0.13440000   0.00097287
  0.13440000   0.00077062
  0.13440000   0.00061043
  0.13440000   0.00048355
  0.13440000   0.00038306
  0.13440000   0.00030346
  0.13440000   0.00024042
  0.13440000   0.00019048
  0.13440000   0.00015093
  0.13440000   0.00011960
  0.13440000   0.00009479
  0.13440000   0.00007513
  0.13440000   0.00005956
  0.13440000   0.00004722
  0.13440000   0.00003745
  0.13440000   0.00002971
  0.13440000   0.00002358
  0.13440000   0.00001872
  0.13460000   0.00317178
  0.13460000   0.00251391
  0.13460000   0.00199251
  0.13460000   0.00157926
  0.13460000   0.00125174
  0.13460000   0.00099216
  0.13460000   0.00078643
  0.13460000   0.00062337
  0.13460000   0.00049413
  0.13460000   0.00039170
  0.13460000   0.00031052
  0.13460000   0.00024617
  0.13460000   0.00019517
  0.13460000   0.00015475
  0.13460000   0.00012271
  0.13460000   0.00009731
  0.13460000   0.00007718
  0.13460000   0.00006122
  0.13460000   0.00004857
  0.13460000   0.00003855
  0.13460000   0.00003060
  0.13460000   0.00002430
  0.13460000   0.00001930
  0.13480000   0.00322384
  0.13480000   0.00255689
  0.13480000   0.00202793
  0.13480000   0.00160842
  0.13480000   0.00127571
  0.13480000   0.00101184
  0.13480000   0.00080256
  0.13480000   0.00063658
  0.13480000   0.00050494
  0.13480000   0.00040054
  0.13480000   0.00031773
  0.13480000   0.00025206
  0.13480000   0.00019997
  0.13480000   0.00015866
  0.13480000   0.00012589
  0.13480000   0.00009990
  0.13480000   0.00007928
  0.13480000   0.00006293
  0.13480000   0.00004996
  0.13480000   0.00003968
  0.13480000   0.00003151
  0.13480000   0.00002504
  0.13480000   0.00001990
  0.13500000   0.00327676
  0.13500000   0.00260060
  0.13500000   0.00206399
  0.13500000   0.00163812
  0.13500000   0.00130013
  0.13500000   0.00103190
  0.13500000   0.00081902
  0.13500000   0.00065007
  0.13500000   0.00051599
  0.13500000   0.00040957
  0.13500000   0.00032512
  0.13500000   0.00025809
  0.13500000   0.00020489
  0.13500000   0.00016267
  0.13500000   0.00012916
  0.13500000   0.00010256
  0.13500000   0.00008145
  0.13500000   0.00006469
  0.13500000   0.00005139
  0.13500000   0.00004084
  0.13500000   0.00003246
  0.13500000   0.00002580
  0.13500000   0.00002052
  0.13520000   0.00333055
  0.13520000   0.00264506
  0.13520000   0.00210068
  0.13520000   0.00166836
  0.13520000   0.00132503
  0.13520000   0.00105236
  0.13520000   0.00083582
  0.13520000   0.00066385
  0.13520000   0.00052728
  0.13520000   0.00041881
  0.13520000   0.00033267
  0.13520000   0.00026426
  0.13520000   0.00020993
  0.13520000   0.00016678
  0.13520000   0.00013251
  0.13520000   0.00010529
  0.13520000   0.00008367
  0.13520000   0.00006650
  0.13520000   0.00005286
  0.13520000   0.00004203
  0.13520000   0.00003343
  0.13520000   0.00002659
  0.13520000   0.00002116
  0.13540000   0.00338522
  0.13540000   0.00269029
  0.13540000   0.00213804
  0.13540000   0.00169916
  0.13540000   0.00135039
  0.13540000   0.00107323
  0.13540000   0.00085297
  0.13540000   0.00067792
  0.13540000   0.00053881
  0.13540000   0.00042826
  0.13540000   0.00034040
  0.13540000   0.00027058
  0.13540000   0.00021509
  0.13540000   0.00017100
  0.13540000   0.00013595
  0.13540000   0.00010809
  0.13540000   0.00008596
  0.13540000   0.00006836
  0.13540000   0.00005438
  0.13540000   0.00004326
  0.13540000   0.00003443
  0.13540000   0.00002740
  0.13540000   0.00002182
  0.13560000   0.00344079
  0.13560000   0.00273629
  0.13560000   0.00217605
  0.13560000   0.00173054
  0.13560000   0.00137625
  0.13560000   0.00109451
  0.13560000   0.00087046
  0.13560000   0.00069229
  0.13560000   0.00055060
  0.13560000   0.00043792
  0.13560000   0.00034832
  0.13560000   0.00027706
  0.13560000   0.00022039
  0.13560000   0.00017532
  0.13560000   0.00013948
  0.13560000   0.00011097
  0.13560000   0.00008830
  0.13560000   0.00007027
  0.13560000   0.00005593
  0.13560000   0.00004453
  0.13560000   0.00003546
  0.13560000   0.00002824
  0.13560000   0.00002250
  0.13580000   0.00349727
  0.13580000   0.00278307
  0.13580000   0.00221474
  0.13580000   0.00176249
  0.13580000   0.00140260
  0.13580000   0.00111622
  0.13580000   0.00088832
  0.13580000   0.00070697
  0.13580000   0.00056265
  0.13580000   0.00044781
  0.13580000   0.00035641
  0.13580000   0.00028369
  0.13580000   0.00022581
  0.13580000   0.00017975
  0.13580000   0.00014310
  0.13580000   0.00011393
  0.13580000   0.00009071
  0.13580000   0.00007224
  0.13580000   0.00005754
  0.13580000   0.00004583
  0.13580000   0.00003652
  0.13580000   0.00002911
  0.13580000   0.00002321
  0.13600000   0.00355468
  0.13600000   0.00283066
  0.13600000   0.00225413
  0.13600000   0.00179504
  0.13600000   0.00142946
  0.13600000   0.00113835
  0.13600000   0.00090654
  0.13600000   0.00072195
  0.13600000   0.00057496
  0.13600000   0.00045791
  0.13600000   0.00036470
  0.13600000   0.00029047
  0.13600000   0.00023137
  0.13600000   0.00018430
  0.13600000   0.00014681
  0.13600000   0.00011696
  0.13600000   0.00009319
  0.13600000   0.00007426
  0.13600000   0.00005918
  0.13600000   0.00004718
  0.13600000   0.00003761
  0.13600000   0.00003000
  0.13600000   0.00002393
  0.13620000   0.00361304
  0.13620000   0.00287906
  0.13620000   0.00229421
  0.13620000   0.00182818
  0.13620000   0.00145683
  0.13620000   0.00116093
  0.13620000   0.00092514
  0.13620000   0.00073726
  0.13620000   0.00058754
  0.13620000   0.00046824
  0.13620000   0.00037318
  0.13620000   0.00029743
  0.13620000   0.00023706
  0.13620000   0.00018896
  0.13620000   0.00015063
  0.13620000   0.00012008
  0.13620000   0.00009574
  0.13620000   0.00007634
  0.13620000   0.00006088
  0.13620000   0.00004856
  0.13620000   0.00003874
  0.13620000   0.00003091
  0.13620000   0.00002468
  0.13640000   0.00367235
  0.13640000   0.00292829
  0.13640000   0.00233501
  0.13640000   0.00186194
  0.13640000   0.00148473
  0.13640000   0.00118395
  0.13640000   0.00094412
  0.13640000   0.00075289
  0.13640000   0.00060040
  0.13640000   0.00047881
  0.13640000   0.00038185
  0.13640000   0.00030454
  0.13640000   0.00024290
  0.13640000   0.00019374
  0.13640000   0.00015454
  0.13640000   0.00012328
  0.13640000   0.00009835
  0.13640000   0.00007847
  0.13640000   0.00006262
  0.13640000   0.00004998
  0.13640000   0.00003990
  0.13640000   0.00003186
  0.13640000   0.00002545
  0.13660000   0.00373264
  0.13660000   0.00297837
  0.13660000   0.00237653
  0.13660000   0.00189632
  0.13660000   0.00151316
  0.13660000   0.00120744
  0.13660000   0.00096349
  0.13660000   0.00076885
  0.13660000   0.00061354
  0.13660000   0.00048962
  0.13660000   0.00039073
  0.13660000   0.00031183
  0.13660000   0.00024887
  0.13660000   0.00019864
  0.13660000   0.00015855
  0.13660000   0.00012656
  0.13660000   0.00010104
  0.13660000   0.00008067
  0.13660000   0.00006442
  0.13660000   0.00005145
  0.13660000   0.00004110
  0.13660000   0.00003284
  0.13660000   0.00002624
  0.13680000   0.00379392
  0.13680000   0.00302930
  0.13680000   0.00241880
  0.13680000   0.00193134
  0.13680000   0.00154214
  0.13680000   0.00123139
  0.13680000   0.00098326
  0.13680000   0.00078515
  0.13680000   0.00062697
  0.13680000   0.00050067
  0.13680000   0.00039982
  0.13680000   0.00031929
  0.13680000   0.00025500
  0.13680000   0.00020366
  0.13680000   0.00016267
  0.13680000   0.00012994
  0.13680000   0.00010380
  0.13680000   0.00008293
  0.13680000   0.00006626
  0.13680000   0.00005296
  0.13680000   0.00004233
  0.13680000   0.00003384
  0.13680000   0.00002706
  0.13700000   0.00385621
  0.13700000   0.00308111
  0.13700000   0.00246181
  0.13700000   0.00196701
  0.13700000   0.00157168
  0.13700000   0.00125581
  0.13700000   0.00100344
  0.13700000   0.00080180
  0.13700000   0.00064069
  0.13700000   0.00051196
  0.13700000   0.00040911
  0.13700000   0.00032694
  0.13700000   0.00026128
  0.13700000   0.00020881
  0.13700000   0.00016689
  0.13700000   0.00013340
  0.13700000   0.00010664
  0.13700000   0.00008525
  0.13700000   0.00006816
  0.13700000   0.00005451
  0.13700000   0.00004360
  0.13700000   0.00003488
  0.13700000   0.00002791
  0.13720000   0.00391953
  0.13720000   0.00313380
  0.13720000   0.00250560
  0.13720000   0.00200334
  0.13720000   0.00160178
  0.13720000   0.00128072
  0.13720000   0.00102403
  0.13720000   0.00081880
  0.13720000   0.00065471
  0.13720000   0.00052352
  0.13720000   0.00041863
  0.13720000   0.00033476
  0.13720000   0.00026771
  0.13720000   0.00021410
  0.13720000   0.00017123
  0.13720000   0.00013696
  0.13720000   0.00010955
  0.13720000   0.00008764
  0.13720000   0.00007012
  0.13720000   0.00005611
  0.13720000   0.00004490
  0.13720000   0.00003595
  0.13720000   0.00002878
  0.13740000   0.00398388
  0.13740000   0.00318739
  0.13740000   0.00255016
  0.13740000   0.00204034
  0.13740000   0.00163245
  0.13740000   0.00130613
  0.13740000   0.00104504
  0.13740000   0.00083616
  0.13740000   0.00066904
  0.13740000   0.00053534
  0.13740000   0.00042836
  0.13740000   0.00034278
  0.13740000   0.00027430
  0.13740000   0.00021951
  0.13740000   0.00017568
  0.13740000   0.00014061
  0.13740000   0.00011255
  0.13740000   0.00009009
  0.13740000   0.00007213
  0.13740000   0.00005775
  0.13740000   0.00004625
  0.13740000   0.00003705
  0.13740000   0.00002968
  0.13760000   0.00404929
  0.13760000   0.00324190
  0.13760000   0.00259551
  0.13760000   0.00207802
  0.13760000   0.00166372
  0.13760000   0.00133203
  0.13760000   0.00106649
  0.13760000   0.00085389
  0.13760000   0.00068369
  0.13760000   0.00054742
  0.13760000   0.00043833
  0.13760000   0.00035098
  0.13760000   0.00028105
  0.13760000   0.00022507
  0.13760000   0.00018024
  0.13760000   0.00014436
  0.13760000   0.00011562
  0.13760000   0.00009262
  0.13760000   0.00007420
  0.13760000   0.00005945
  0.13760000   0.00004764
  0.13760000   0.00003818
  0.13760000   0.00003061
  0.13780000   0.00411578
  0.13780000   0.00329735
  0.13780000   0.00264168
  0.13780000   0.00211640
  0.13780000   0.00169559
  0.13780000   0.00135846
  0.13780000   0.00108837
  0.13780000   0.00087200
  0.13780000   0.00069865
  0.13780000   0.00055978
  0.13780000   0.00044852
  0.13780000   0.00035938
  0.13780000   0.00028797
  0.13780000   0.00023076
  0.13780000   0.00018493
  0.13780000   0.00014820
  0.13780000   0.00011878
  0.13780000   0.00009521
  0.13780000   0.00007632
  0.13780000   0.00006119
  0.13780000   0.00004907
  0.13780000   0.00003935
  0.13780000   0.00003157
  0.13800000   0.00418336
  0.13800000   0.00335374
  0.13800000   0.00268866
  0.13800000   0.00215549
  0.13800000   0.00172806
  0.13800000   0.00138541
  0.13800000   0.00111071
  0.13800000   0.00089049
  0.13800000   0.00071395
  0.13800000   0.00057242
  0.13800000   0.00045895
  0.13800000   0.00036799
  0.13800000   0.00029507
  0.13800000   0.00023660
  0.13800000   0.00018973
  0.13800000   0.00015216
  0.13800000   0.00012203
  0.13800000   0.00009788
  0.13800000   0.00007851
  0.13800000   0.00006299
  0.13800000   0.00005054
  0.13800000   0.00004056
  0.13800000   0.00003256
  0.13820000   0.00425206
  0.13820000   0.00341110
  0.13820000   0.00273649
  0.13820000   0.00219531
  0.13820000   0.00176117
  0.13820000   0.00141289
  0.13820000   0.00113351
  0.13820000   0.00090938
  0.13820000   0.00072958
  0.13820000   0.00058534
  0.13820000   0.00046963
  0.13820000   0.00037680
  0.13820000   0.00030233
  0.13820000   0.00024259
  0.13820000   0.00019466
  0.13820000   0.00015621
  0.13820000   0.00012537
  0.13820000   0.00010062
  0.13820000   0.00008077
  0.13820000   0.00006484
  0.13820000   0.00005206
  0.13820000   0.00004180
  0.13820000   0.00003358
  0.13840000   0.00432188
  0.13840000   0.00346945
  0.13840000   0.00278516
  0.13840000   0.00223586
  0.13840000   0.00179490
  0.13840000   0.00144092
  0.13840000   0.00115677
  0.13840000   0.00092866
  0.13840000   0.00074555
  0.13840000   0.00059855
  0.13840000   0.00048055
  0.13840000   0.00038582
  0.13840000   0.00030978
  0.13840000   0.00024873
  0.13840000   0.00019972
  0.13840000   0.00016038
  0.13840000   0.00012880
  0.13840000   0.00010344
  0.13840000   0.00008308
  0.13840000   0.00006674
  0.13840000   0.00005362
  0.13840000   0.00004309
  0.13840000   0.00003463
  0.13860000   0.00439285
  0.13860000   0.00352879
  0.13860000   0.00283471
  0.13860000   0.00227716
  0.13860000   0.00182928
  0.13860000   0.00146951
  0.13860000   0.00118051
  0.13860000   0.00094836
  0.13860000   0.00076187
  0.13860000   0.00061207
  0.13860000   0.00049173
  0.13860000   0.00039506
  0.13860000   0.00031741
  0.13860000   0.00025503
  0.13860000   0.00020491
  0.13860000   0.00016466
  0.13860000   0.00013232
  0.13860000   0.00010634
  0.13860000   0.00008547
  0.13860000   0.00006870
  0.13860000   0.00005523
  0.13860000   0.00004441
  0.13860000   0.00003571
  0.13880000   0.00446499
  0.13880000   0.00358915
  0.13880000   0.00288513
  0.13880000   0.00231922
  0.13880000   0.00186433
  0.13880000   0.00149867
  0.13880000   0.00120474
  0.13880000   0.00096847
  0.13880000   0.00077855
  0.13880000   0.00062589
  0.13880000   0.00050317
  0.13880000   0.00040452
  0.13880000   0.00032522
  0.13880000   0.00026148
  0.13880000   0.00021024
  0.13880000   0.00016905
  0.13880000   0.00013594
  0.13880000   0.00010932
  0.13880000   0.00008792
  0.13880000   0.00007072
  0.13880000   0.00005689
  0.13880000   0.00004577
  0.13880000   0.00003683
  0.13900000   0.00453831
  0.13900000   0.00365054
  0.13900000   0.00293645
  0.13900000   0.00236206
  0.13900000   0.00190004
  0.13900000   0.00152840
  0.13900000   0.00122947
  0.13900000   0.00098901
  0.13900000   0.00079560
  0.13900000   0.00064002
  0.13900000   0.00051487
  0.13900000   0.00041421
  0.13900000   0.00033323
  0.13900000   0.00026810
  0.13900000   0.00021571
  0.13900000   0.00017356
  0.13900000   0.00013966
  0.13900000   0.00011238
  0.13900000   0.00009044
  0.13900000   0.00007280
  0.13900000   0.00005860
  0.13900000   0.00004718
  0.13900000   0.00003799
  0.13920000   0.00461284
  0.13920000   0.00371299
  0.13920000   0.00298869
  0.13920000   0.00240570
  0.13920000   0.00193644
  0.13920000   0.00155873
  0.13920000   0.00125471
  0.13920000   0.00100999
  0.13920000   0.00081302
  0.13920000   0.00065447
  0.13920000   0.00052685
  0.13920000   0.00042413
  0.13920000   0.00034144
  0.13920000   0.00027489
  0.13920000   0.00022131
  0.13920000   0.00017819
  0.13920000   0.00014348
  0.13920000   0.00011553
  0.13920000   0.00009304
  0.13920000   0.00007494
  0.13920000   0.00006036
  0.13920000   0.00004863
  0.13920000   0.00003918
  0.13940000   0.00468860
  0.13940000   0.00377650
  0.13940000   0.00304186
  0.13940000   0.00245014
  0.13940000   0.00197354
  0.13940000   0.00158966
  0.13940000   0.00128046
  0.13940000   0.00103142
  0.13940000   0.00083082
  0.13940000   0.00066925
  0.13940000   0.00053911
  0.13940000   0.00043429
  0.13940000   0.00034985
  0.13940000   0.00028185
  0.13940000   0.00022707
  0.13940000   0.00018294
  0.13940000   0.00014740
  0.13940000   0.00011877
  0.13940000   0.00009571
  0.13940000   0.00007714
  0.13940000   0.00006217
  0.13940000   0.00005012
  0.13940000   0.00004041
  0.13960000   0.00476560
  0.13960000   0.00384111
  0.13960000   0.00309597
  0.13960000   0.00249540
  0.13960000   0.00201135
  0.13960000   0.00162120
  0.13960000   0.00130675
  0.13960000   0.00105329
  0.13960000   0.00084901
  0.13960000   0.00068436
  0.13960000   0.00055165
  0.13960000   0.00044469
  0.13960000   0.00035847
  0.13960000   0.00028898
  0.13960000   0.00023297
  0.13960000   0.00018782
  0.13960000   0.00015144
  0.13960000   0.00012210
  0.13960000   0.00009846
  0.13960000   0.00007940
  0.13960000   0.00006404
  0.13960000   0.00005166
  0.13960000   0.00004168
  0.13980000   0.00484387
  0.13980000   0.00390682
  0.13980000   0.00315105
  0.13980000   0.00254151
  0.13980000   0.00204988
  0.13980000   0.00165337
  0.13980000   0.00133357
  0.13980000   0.00107564
  0.13980000   0.00086760
  0.13980000   0.00069982
  0.13980000   0.00056449
  0.13980000   0.00045534
  0.13980000   0.00036730
  0.13980000   0.00029630
  0.13980000   0.00023903
  0.13980000   0.00019284
  0.13980000   0.00015558
  0.13980000   0.00012553
  0.13980000   0.00010129
  0.13980000   0.00008174
  0.13980000   0.00006597
  0.13980000   0.00005325
  0.13980000   0.00004299
  0.14000000   0.00492343
  0.14000000   0.00397365
  0.14000000   0.00320711
  0.14000000   0.00258846
  0.14000000   0.00208916
  0.14000000   0.00168618
  0.14000000   0.00136095
  0.14000000   0.00109846
  0.14000000   0.00088660
  0.14000000   0.00071562
  0.14000000   0.00057762
  0.14000000   0.00046625
  0.14000000   0.00037635
  0.14000000   0.00030380
  0.14000000   0.00024524
  0.14000000   0.00019798
  0.14000000   0.00015984
  0.14000000   0.00012905
  0.14000000   0.00010420
  0.14000000   0.00008414
  0.14000000   0.00006795
  0.14000000   0.00005488
  0.14000000   0.00004433
  0.14020000   0.00500429
  0.14020000   0.00404163
  0.14020000   0.00326417
  0.14020000   0.00263628
  0.14020000   0.00212919
  0.14020000   0.00171964
  0.14020000   0.00138889
  0.14020000   0.00112176
  0.14020000   0.00090602
  0.14020000   0.00073178
  0.14020000   0.00059106
  0.14020000   0.00047741
  0.14020000   0.00038563
  0.14020000   0.00031149
  0.14020000   0.00025162
  0.14020000   0.00020327
  0.14020000   0.00016421
  0.14020000   0.00013267
  0.14020000   0.00010719
  0.14020000   0.00008661
  0.14020000   0.00006999
  0.14020000   0.00005657
  0.14020000   0.00004573
  0.14040000   0.00508648
  0.14040000   0.00411078
  0.14040000   0.00332225
  0.14040000   0.00268499
  0.14040000   0.00216998
  0.14040000   0.00175377
  0.14040000   0.00141740
  0.14040000   0.00114556
  0.14040000   0.00092586
  0.14040000   0.00074831
  0.14040000   0.00060482
  0.14040000   0.00048885
  0.14040000   0.00039513
  0.14040000   0.00031938
  0.14040000   0.00025817
  0.14040000   0.00020869
  0.14040000   0.00016871
  0.14040000   0.00013639
  0.14040000   0.00011027
  0.14040000   0.00008916
  0.14040000   0.00007210
  0.14040000   0.00005831
  0.14040000   0.00004716
  0.14060000   0.00517003
  0.14060000   0.00418111
  0.14060000   0.00338136
  0.14060000   0.00273460
  0.14060000   0.00221156
  0.14060000   0.00178857
  0.14060000   0.00144650
  0.14060000   0.00116986
  0.14060000   0.00094614
  0.14060000   0.00076521
  0.14060000   0.00061889
  0.14060000   0.00050056
  0.14060000   0.00040486
  0.14060000   0.00032747
  0.14060000   0.00026488
  0.14060000   0.00021426
  0.14060000   0.00017332
  0.14060000   0.00014022
  0.14060000   0.00011344
  0.14060000   0.00009178
  0.14060000   0.00007427
  0.14060000   0.00006010
  0.14060000   0.00004864
  0.14080000   0.00525495
  0.14080000   0.00425264
  0.14080000   0.00344152
  0.14080000   0.00278513
  0.14080000   0.00225394
  0.14080000   0.00182407
  0.14080000   0.00147620
  0.14080000   0.00119468
  0.14080000   0.00096686
  0.14080000   0.00078250
  0.14080000   0.00063330
  0.14080000   0.00051255
  0.14080000   0.00041484
  0.14080000   0.00033577
  0.14080000   0.00027177
  0.14080000   0.00021998
  0.14080000   0.00017807
  0.14080000   0.00014415
  0.14080000   0.00011670
  0.14080000   0.00009448
  0.14080000   0.00007650
  0.14080000   0.00006195
  0.14080000   0.00005017
  0.14100000   0.00534127
  0.14100000   0.00432540
  0.14100000   0.00350276
  0.14100000   0.00283659
  0.14100000   0.00229713
  0.14100000   0.00186027
  0.14100000   0.00150651
  0.14100000   0.00122003
  0.14100000   0.00098804
  0.14100000   0.00080017
  0.14100000   0.00064804
  0.14100000   0.00052483
  0.14100000   0.00042506
  0.14100000   0.00034427
  0.14100000   0.00027884
  0.14100000   0.00022585
  0.14100000   0.00018294
  0.14100000   0.00014819
  0.14100000   0.00012005
  0.14100000   0.00009726
  0.14100000   0.00007880
  0.14100000   0.00006386
  0.14100000   0.00005175
  0.14120000   0.00542900
  0.14120000   0.00439941
  0.14120000   0.00356509
  0.14120000   0.00288900
  0.14120000   0.00234115
  0.14120000   0.00189719
  0.14120000   0.00153744
  0.14120000   0.00124592
  0.14120000   0.00100968
  0.14120000   0.00081825
  0.14120000   0.00066312
  0.14120000   0.00053741
  0.14120000   0.00043554
  0.14120000   0.00035299
  0.14120000   0.00028609
  0.14120000   0.00023188
  0.14120000   0.00018795
  0.14120000   0.00015235
  0.14120000   0.00012350
  0.14120000   0.00010012
  0.14120000   0.00008118
  0.14120000   0.00006582
  0.14120000   0.00005338
  0.14140000   0.00551818
  0.14140000   0.00447468
  0.14140000   0.00362852
  0.14140000   0.00294239
  0.14140000   0.00238601
  0.14140000   0.00193485
  0.14140000   0.00156901
  0.14140000   0.00127235
  0.14140000   0.00103180
  0.14140000   0.00083673
  0.14140000   0.00067855
  0.14140000   0.00055029
  0.14140000   0.00044627
  0.14140000   0.00036193
  0.14140000   0.00029354
  0.14140000   0.00023807
  0.14140000   0.00019310
  0.14140000   0.00015663
  0.14140000   0.00012705
  0.14140000   0.00010307
  0.14140000   0.00008362
  0.14140000   0.00006784
  0.14140000   0.00005505
  0.14160000   0.00560883
  0.14160000   0.00455125
  0.14160000   0.00369309
  0.14160000   0.00299676
  0.14160000   0.00243173
  0.14160000   0.00197325
  0.14160000   0.00160123
  0.14160000   0.00129935
  0.14160000   0.00105440
  0.14160000   0.00085563
  0.14160000   0.00069435
  0.14160000   0.00056347
  0.14160000   0.00045727
  0.14160000   0.00037110
  0.14160000   0.00030117
  0.14160000   0.00024443
  0.14160000   0.00019839
  0.14160000   0.00016102
  0.14160000   0.00013070
  0.14160000   0.00010610
  0.14160000   0.00008613
  0.14160000   0.00006993
  0.14160000   0.00005678
  0.14180000   0.00570096
  0.14180000   0.00462912
  0.14180000   0.00375881
  0.14180000   0.00305214
  0.14180000   0.00247834
  0.14180000   0.00201242
  0.14180000   0.00163411
  0.14180000   0.00132692
  0.14180000   0.00107749
  0.14180000   0.00087496
  0.14180000   0.00071051
  0.14180000   0.00057697
  0.14180000   0.00046854
  0.14180000   0.00038050
  0.14180000   0.00030901
  0.14180000   0.00025096
  0.14180000   0.00020382
  0.14180000   0.00016554
  0.14180000   0.00013446
  0.14180000   0.00010922
  0.14180000   0.00008873
  0.14180000   0.00007208
  0.14180000   0.00005857
  0.14200000   0.00579462
  0.14200000   0.00470833
  0.14200000   0.00382570
  0.14200000   0.00310854
  0.14200000   0.00252583
  0.14200000   0.00205237
  0.14200000   0.00166766
  0.14200000   0.00135508
  0.14200000   0.00110110
  0.14200000   0.00089473
  0.14200000   0.00072705
  0.14200000   0.00059080
  0.14200000   0.00048009
  0.14200000   0.00039014
  0.14200000   0.00031705
  0.14200000   0.00025766
  0.14200000   0.00020940
  0.14200000   0.00017019
  0.14200000   0.00013833
  0.14200000   0.00011244
  0.14200000   0.00009140
  0.14200000   0.00007430
  0.14200000   0.00006041
  0.14220000   0.00588981
  0.14220000   0.00478890
  0.14220000   0.00389378
  0.14220000   0.00316599
  0.14220000   0.00257424
  0.14220000   0.00209311
  0.14220000   0.00170191
  0.14220000   0.00138384
  0.14220000   0.00112522
  0.14220000   0.00091494
  0.14220000   0.00074397
  0.14220000   0.00060496
  0.14220000   0.00049193
  0.14220000   0.00040003
  0.14220000   0.00032530
  0.14220000   0.00026454
  0.14220000   0.00021514
  0.14220000   0.00017497
  0.14220000   0.00014231
  0.14220000   0.00011575
  0.14220000   0.00009415
  0.14220000   0.00007659
  0.14220000   0.00006231
  0.14240000   0.00598657
  0.14240000   0.00487085
  0.14240000   0.00396307
  0.14240000   0.00322450
  0.14240000   0.00262358
  0.14240000   0.00213466
  0.14240000   0.00173686
  0.14240000   0.00141320
  0.14240000   0.00114987
  0.14240000   0.00093562
  0.14240000   0.00076129
  0.14240000   0.00061946
  0.14240000   0.00050406
  0.14240000   0.00041016
  0.14240000   0.00033376
  0.14240000   0.00027161
  0.14240000   0.00022103
  0.14240000   0.00017988
  0.14240000   0.00014640
  0.14240000   0.00011915
  0.14240000   0.00009699
  0.14240000   0.00007895
  0.14240000   0.00006427
  0.14260000   0.00608492
  0.14260000   0.00495420
  0.14260000   0.00403360
  0.14260000   0.00328409
  0.14260000   0.00267386
  0.14260000   0.00217703
  0.14260000   0.00177253
  0.14260000   0.00144320
  0.14260000   0.00117506
  0.14260000   0.00095675
  0.14260000   0.00077901
  0.14260000   0.00063430
  0.14260000   0.00051648
  0.14260000   0.00042055
  0.14260000   0.00034245
  0.14260000   0.00027886
  0.14260000   0.00022709
  0.14260000   0.00018493
  0.14260000   0.00015061
  0.14260000   0.00012266
  0.14260000   0.00009991
  0.14260000   0.00008138
  0.14260000   0.00006629
  0.14280000   0.00618489
  0.14280000   0.00503898
  0.14280000   0.00410539
  0.14280000   0.00334478
  0.14280000   0.00272511
  0.14280000   0.00222025
  0.14280000   0.00180893
  0.14280000   0.00147382
  0.14280000   0.00120081
  0.14280000   0.00097837
  0.14280000   0.00079715
  0.14280000   0.00064951
  0.14280000   0.00052921
  0.14280000   0.00043121
  0.14280000   0.00035136
  0.14280000   0.00028631
  0.14280000   0.00023331
  0.14280000   0.00019012
  0.14280000   0.00015494
  0.14280000   0.00012627
  0.14280000   0.00010292
  0.14280000   0.00008389
  0.14280000   0.00006838
  0.14300000   0.00628650
  0.14300000   0.00512521
  0.14300000   0.00417845
  0.14300000   0.00340660
  0.14300000   0.00277734
  0.14300000   0.00226432
  0.14300000   0.00184608
  0.14300000   0.00150510
  0.14300000   0.00122711
  0.14300000   0.00100048
  0.14300000   0.00081571
  0.14300000   0.00066507
  0.14300000   0.00054226
  0.14300000   0.00044214
  0.14300000   0.00036051
  0.14300000   0.00029396
  0.14300000   0.00023970
  0.14300000   0.00019546
  0.14300000   0.00015940
  0.14300000   0.00012999
  0.14300000   0.00010602
  0.14300000   0.00008647
  0.14300000   0.00007053
  0.14320000   0.00638979
  0.14320000   0.00521292
  0.14320000   0.00425282
  0.14320000   0.00346956
  0.14320000   0.00283057
  0.14320000   0.00230928
  0.14320000   0.00188400
  0.14320000   0.00153705
  0.14320000   0.00125400
  0.14320000   0.00102309
  0.14320000   0.00083470
  0.14320000   0.00068101
  0.14320000   0.00055563
  0.14320000   0.00045334
  0.14320000   0.00036989
  0.14320000   0.00030181
  0.14320000   0.00024626
  0.14320000   0.00020095
  0.14320000   0.00016398
  0.14320000   0.00013382
  0.14320000   0.00010921
  0.14320000   0.00008913
  0.14320000   0.00007275
  0.14340000   0.00649477
  0.14340000   0.00530213
  0.14340000   0.00432851
  0.14340000   0.00353369
  0.14340000   0.00288483
  0.14340000   0.00235512
  0.14340000   0.00192269
  0.14340000   0.00156967
  0.14340000   0.00128148
  0.14340000   0.00104621
  0.14340000   0.00085414
  0.14340000   0.00069734
  0.14340000   0.00056933
  0.14340000   0.00046483
  0.14340000   0.00037952
  0.14340000   0.00030987
  0.14340000   0.00025301
  0.14340000   0.00020659
  0.14340000   0.00016870
  0.14340000   0.00013776
  0.14340000   0.00011250
  0.14340000   0.00009188
  0.14340000   0.00007504
  0.14360000   0.00660148
  0.14360000   0.00539288
  0.14360000   0.00440556
  0.14360000   0.00359901
  0.14360000   0.00294013
  0.14360000   0.00240188
  0.14360000   0.00196218
  0.14360000   0.00160299
  0.14360000   0.00130956
  0.14360000   0.00106985
  0.14360000   0.00087402
  0.14360000   0.00071405
  0.14360000   0.00058337
  0.14360000   0.00047661
  0.14360000   0.00038940
  0.14360000   0.00031815
  0.14360000   0.00025995
  0.14360000   0.00021240
  0.14360000   0.00017355
  0.14360000   0.00014182
  0.14360000   0.00011589
  0.14360000   0.00009471
  0.14360000   0.00007741
  0.14380000   0.00670995
  0.14380000   0.00548517
  0.14380000   0.00448397
  0.14380000   0.00366553
  0.14380000   0.00299649
  0.14380000   0.00244957
  0.14380000   0.00200249
  0.14380000   0.00163701
  0.14380000   0.00133825
  0.14380000   0.00109402
  0.14380000   0.00089438
  0.14380000   0.00073117
  0.14380000   0.00059775
  0.14380000   0.00048869
  0.14380000   0.00039953
  0.14380000   0.00032665
  0.14380000   0.00026707
  0.14380000   0.00021836
  0.14380000   0.00017854
  0.14380000   0.00014599
  0.14380000   0.00011938
  0.14380000   0.00009763
  0.14380000   0.00007984
  0.14400000   0.00682020
  0.14400000   0.00557905
  0.14400000   0.00456378
  0.14400000   0.00373328
  0.14400000   0.00305393
  0.14400000   0.00249820
  0.14400000   0.00204362
  0.14400000   0.00167176
  0.14400000   0.00136758
  0.14400000   0.00111875
  0.14400000   0.00091520
  0.14400000   0.00074870
  0.14400000   0.00061250
  0.14400000   0.00050108
  0.14400000   0.00040993
  0.14400000   0.00033538
  0.14400000   0.00027439
  0.14400000   0.00022450
  0.14400000   0.00018368
  0.14400000   0.00015029
  0.14400000   0.00012298
  0.14400000   0.00010064
  0.14400000   0.00008236
  0.14420000   0.00693227
  0.14420000   0.00567454
  0.14420000   0.00464502
  0.14420000   0.00380229
  0.14420000   0.00311247
  0.14420000   0.00254781
  0.14420000   0.00208560
  0.14420000   0.00170725
  0.14420000   0.00139754
  0.14420000   0.00114403
  0.14420000   0.00093651
  0.14420000   0.00076665
  0.14420000   0.00062760
  0.14420000   0.00051378
  0.14420000   0.00042061
  0.14420000   0.00034434
  0.14420000   0.00028191
  0.14420000   0.00023080
  0.14420000   0.00018897
  0.14420000   0.00015472
  0.14420000   0.00012669
  0.14420000   0.00010374
  0.14420000   0.00008495
  0.14440000   0.00704617
  0.14440000   0.00577166
  0.14440000   0.00472770
  0.14440000   0.00387257
  0.14440000   0.00317213
  0.14440000   0.00259839
  0.14440000   0.00212844
  0.14440000   0.00174349
  0.14440000   0.00142817
  0.14440000   0.00116989
  0.14440000   0.00095832
  0.14440000   0.00078503
  0.14440000   0.00064308
  0.14440000   0.00052680
  0.14440000   0.00043156
  0.14440000   0.00035354
  0.14440000   0.00028963
  0.14440000   0.00023729
  0.14440000   0.00019441
  0.14440000   0.00015928
  0.14440000   0.00013051
  0.14440000   0.00010694
  0.14440000   0.00008763
  0.14460000   0.00716196
  0.14460000   0.00587045
  0.14460000   0.00481185
  0.14460000   0.00394416
  0.14460000   0.00323295
  0.14460000   0.00264999
  0.14460000   0.00217216
  0.14460000   0.00178050
  0.14460000   0.00145947
  0.14460000   0.00119633
  0.14460000   0.00098064
  0.14460000   0.00080385
  0.14460000   0.00065894
  0.14460000   0.00054016
  0.14460000   0.00044279
  0.14460000   0.00036299
  0.14460000   0.00029757
  0.14460000   0.00024395
  0.14460000   0.00020000
  0.14460000   0.00016397
  0.14460000   0.00013444
  0.14460000   0.00011023
  0.14460000   0.00009039
  0.14480000   0.00727964
  0.14480000   0.00597093
  0.14480000   0.00489751
  0.14480000   0.00401707
  0.14480000   0.00329492
  0.14480000   0.00270261
  0.14480000   0.00221678
  0.14480000   0.00181830
  0.14480000   0.00149145
  0.14480000   0.00122337
  0.14480000   0.00100348
  0.14480000   0.00082312
  0.14480000   0.00067519
  0.14480000   0.00055385
  0.14480000   0.00045432
  0.14480000   0.00037269
  0.14480000   0.00030573
  0.14480000   0.00025081
  0.14480000   0.00020576
  0.14480000   0.00016880
  0.14480000   0.00013849
  0.14480000   0.00011363
  0.14480000   0.00009324
  0.14500000   0.00739927
  0.14500000   0.00607313
  0.14500000   0.00498469
  0.14500000   0.00409133
  0.14500000   0.00335809
  0.14500000   0.00275627
  0.14500000   0.00226232
  0.14500000   0.00185690
  0.14500000   0.00152414
  0.14500000   0.00125102
  0.14500000   0.00102685
  0.14500000   0.00084286
  0.14500000   0.00069184
  0.14500000   0.00056789
  0.14500000   0.00046615
  0.14500000   0.00038265
  0.14500000   0.00031411
  0.14500000   0.00025785
  0.14500000   0.00021168
  0.14500000   0.00017378
  0.14500000   0.00014267
  0.14500000   0.00011714
  0.14500000   0.00009618
  0.14520000   0.00752086
  0.14520000   0.00617709
  0.14520000   0.00507342
  0.14520000   0.00416697
  0.14520000   0.00342247
  0.14520000   0.00281101
  0.14520000   0.00230880
  0.14520000   0.00189632
  0.14520000   0.00155754
  0.14520000   0.00127930
  0.14520000   0.00105077
  0.14520000   0.00086307
  0.14520000   0.00070891
  0.14520000   0.00058229
  0.14520000   0.00047829
  0.14520000   0.00039288
  0.14520000   0.00032272
  0.14520000   0.00026510
  0.14520000   0.00021777
  0.14520000   0.00017890
  0.14520000   0.00014697
  0.14520000   0.00012075
  0.14520000   0.00009921
  0.14540000   0.00764445
  0.14540000   0.00628282
  0.14540000   0.00516374
  0.14540000   0.00424400
  0.14540000   0.00348809
  0.14540000   0.00286683
  0.14540000   0.00235623
  0.14540000   0.00193658
  0.14540000   0.00159168
  0.14540000   0.00130821
  0.14540000   0.00107524
  0.14540000   0.00088376
  0.14540000   0.00072639
  0.14540000   0.00059705
  0.14540000   0.00049075
  0.14540000   0.00040338
  0.14540000   0.00033157
  0.14540000   0.00027255
  0.14540000   0.00022404
  0.14540000   0.00018417
  0.14540000   0.00015140
  0.14540000   0.00012447
  0.14540000   0.00010234
  0.14560000   0.00777008
  0.14560000   0.00639037
  0.14560000   0.00525567
  0.14560000   0.00432246
  0.14560000   0.00355497
  0.14560000   0.00292376
  0.14560000   0.00240464
  0.14560000   0.00197769
  0.14560000   0.00162657
  0.14560000   0.00133779
  0.14560000   0.00110028
  0.14560000   0.00090495
  0.14560000   0.00074431
  0.14560000   0.00061219
  0.14560000   0.00050353
  0.14560000   0.00041416
  0.14560000   0.00034066
  0.14560000   0.00028021
  0.14560000   0.00023049
  0.14560000   0.00018960
  0.14560000   0.00015597
  0.14560000   0.00012831
  0.14560000   0.00010556
  0.14580000   0.00789777
  0.14580000   0.00649976
  0.14580000   0.00534923
  0.14580000   0.00440237
  0.14580000   0.00362313
  0.14580000   0.00298182
  0.14580000   0.00245404
  0.14580000   0.00201968
  0.14580000   0.00166222
  0.14580000   0.00136803
  0.14580000   0.00112591
  0.14580000   0.00092666
  0.14580000   0.00076267
  0.14580000   0.00062771
  0.14580000   0.00051664
  0.14580000   0.00042523
  0.14580000   0.00035000
  0.14580000   0.00028808
  0.14580000   0.00023713
  0.14580000   0.00019519
  0.14580000   0.00016068
  0.14580000   0.00013227
  0.14580000   0.00010889
  0.14600000   0.00802756
  0.14600000   0.00661103
  0.14600000   0.00544447
  0.14600000   0.00448376
  0.14600000   0.00369260
  0.14600000   0.00304104
  0.14600000   0.00250446
  0.14600000   0.00206257
  0.14600000   0.00169865
  0.14600000   0.00139895
  0.14600000   0.00115214
  0.14600000   0.00094888
  0.14600000   0.00078148
  0.14600000   0.00064363
  0.14600000   0.00053009
  0.14600000   0.00043660
  0.14600000   0.00035959
  0.14600000   0.00029618
  0.14600000   0.00024395
  0.14600000   0.00020094
  0.14600000   0.00016552
  0.14600000   0.00013635
  0.14600000   0.00011232
  0.14620000   0.00815949
  0.14620000   0.00672420
  0.14620000   0.00554140
  0.14620000   0.00456666
  0.14620000   0.00376340
  0.14620000   0.00310143
  0.14620000   0.00255592
  0.14620000   0.00210636
  0.14620000   0.00173588
  0.14620000   0.00143058
  0.14620000   0.00117898
  0.14620000   0.00097163
  0.14620000   0.00080076
  0.14620000   0.00065995
  0.14620000   0.00054390
  0.14620000   0.00044827
  0.14620000   0.00036945
  0.14620000   0.00030451
  0.14620000   0.00025098
  0.14620000   0.00020687
  0.14620000   0.00017052
  0.14620000   0.00014056
  0.14620000   0.00011587
  0.14640000   0.00829359
  0.14640000   0.00683931
  0.14640000   0.00564005
  0.14640000   0.00465110
  0.14640000   0.00383556
  0.14640000   0.00316303
  0.14640000   0.00260843
  0.14640000   0.00215108
  0.14640000   0.00177394
  0.14640000   0.00146292
  0.14640000   0.00120644
  0.14640000   0.00099493
  0.14640000   0.00082052
  0.14640000   0.00067668
  0.14640000   0.00055807
  0.14640000   0.00046025
  0.14640000   0.00037959
  0.14640000   0.00031306
  0.14640000   0.00025821
  0.14640000   0.00021297
  0.14640000   0.00017566
  0.14640000   0.00014489
  0.14640000   0.00011952
  0.14660000   0.00842989
  0.14660000   0.00695640
  0.14660000   0.00574047
  0.14660000   0.00473709
  0.14660000   0.00390910
  0.14660000   0.00322585
  0.14660000   0.00266203
  0.14660000   0.00219676
  0.14660000   0.00181282
  0.14660000   0.00149599
  0.14660000   0.00123454
  0.14660000   0.00101880
  0.14660000   0.00084076
  0.14660000   0.00069384
  0.14660000   0.00057260
  0.14660000   0.00047256
  0.14660000   0.00039000
  0.14660000   0.00032186
  0.14660000   0.00026564
  0.14660000   0.00021925
  0.14660000   0.00018096
  0.14660000   0.00014936
  0.14660000   0.00012329
  0.14680000   0.00856844
  0.14680000   0.00707549
  0.14680000   0.00584268
  0.14680000   0.00482468
  0.14680000   0.00398406
  0.14680000   0.00328992
  0.14680000   0.00271673
  0.14680000   0.00224341
  0.14680000   0.00185256
  0.14680000   0.00152981
  0.14680000   0.00126330
  0.14680000   0.00104323
  0.14680000   0.00086150
  0.14680000   0.00071144
  0.14680000   0.00058752
  0.14680000   0.00048519
  0.14680000   0.00040069
  0.14680000   0.00033091
  0.14680000   0.00027329
  0.14680000   0.00022571
  0.14680000   0.00018642
  0.14680000   0.00015397
  0.14680000   0.00012718
  0.14700000   0.00870927
  0.14700000   0.00719662
  0.14700000   0.00594670
  0.14700000   0.00491389
  0.14700000   0.00406046
  0.14700000   0.00335526
  0.14700000   0.00277255
  0.14700000   0.00229104
  0.14700000   0.00189317
  0.14700000   0.00156440
  0.14700000   0.00129274
  0.14700000   0.00106825
  0.14700000   0.00088276
  0.14700000   0.00072948
  0.14700000   0.00060282
  0.14700000   0.00049816
  0.14700000   0.00041168
  0.14700000   0.00034022
  0.14700000   0.00028116
  0.14700000   0.00023237
  0.14700000   0.00019204
  0.14700000   0.00015872
  0.14700000   0.00013119
  0.14720000   0.00885242
  0.14720000   0.00731983
  0.14720000   0.00605259
  0.14720000   0.00500475
  0.14720000   0.00413832
  0.14720000   0.00342190
  0.14720000   0.00282952
  0.14720000   0.00233970
  0.14720000   0.00193467
  0.14720000   0.00159977
  0.14720000   0.00132285
  0.14720000   0.00109387
  0.14720000   0.00090454
  0.14720000   0.00074798
  0.14720000   0.00061853
  0.14720000   0.00051148
  0.14720000   0.00042297
  0.14720000   0.00034978
  0.14720000   0.00028926
  0.14720000   0.00023922
  0.14720000   0.00019784
  0.14720000   0.00016362
  0.14720000   0.00013533
  0.14740000   0.00899792
  0.14740000   0.00744515
  0.14740000   0.00616036
  0.14740000   0.00509729
  0.14740000   0.00421768
  0.14740000   0.00348987
  0.14740000   0.00288766
  0.14740000   0.00238938
  0.14740000   0.00197709
  0.14740000   0.00163594
  0.14740000   0.00135367
  0.14740000   0.00112011
  0.14740000   0.00092686
  0.14740000   0.00076695
  0.14740000   0.00063464
  0.14740000   0.00052516
  0.14740000   0.00043457
  0.14740000   0.00035962
  0.14740000   0.00029759
  0.14740000   0.00024627
  0.14740000   0.00020381
  0.14740000   0.00016867
  0.14740000   0.00013960
  0.14760000   0.00914581
  0.14760000   0.00757262
  0.14760000   0.00627005
  0.14760000   0.00519154
  0.14760000   0.00429856
  0.14760000   0.00355919
  0.14760000   0.00294700
  0.14760000   0.00244012
  0.14760000   0.00202043
  0.14760000   0.00167293
  0.14760000   0.00138521
  0.14760000   0.00114698
  0.14760000   0.00094973
  0.14760000   0.00078640
  0.14760000   0.00065117
  0.14760000   0.00053920
  0.14760000   0.00044649
  0.14760000   0.00036973
  0.14760000   0.00030617
  0.14760000   0.00025354
  0.14760000   0.00020996
  0.14760000   0.00017388
  0.14760000   0.00014400
  0.14780000   0.00929614
  0.14780000   0.00770227
  0.14780000   0.00638169
  0.14780000   0.00528754
  0.14780000   0.00438100
  0.14780000   0.00362989
  0.14780000   0.00300756
  0.14780000   0.00249194
  0.14780000   0.00206473
  0.14780000   0.00171076
  0.14780000   0.00141749
  0.14780000   0.00117449
  0.14780000   0.00097316
  0.14780000   0.00080635
  0.14780000   0.00066814
  0.14780000   0.00055362
  0.14780000   0.00045874
  0.14780000   0.00038012
  0.14780000   0.00031499
  0.14780000   0.00026102
  0.14780000   0.00021630
  0.14780000   0.00017925
  0.14780000   0.00014855
  0.14800000   0.00944894
  0.14800000   0.00783415
  0.14800000   0.00649533
  0.14800000   0.00538532
  0.14800000   0.00446502
  0.14800000   0.00370199
  0.14800000   0.00306937
  0.14800000   0.00254486
  0.14800000   0.00211000
  0.14800000   0.00174945
  0.14800000   0.00145051
  0.14800000   0.00120267
  0.14800000   0.00099718
  0.14800000   0.00082680
  0.14800000   0.00068554
  0.14800000   0.00056843
  0.14800000   0.00047132
  0.14800000   0.00039081
  0.14800000   0.00032406
  0.14800000   0.00026871
  0.14800000   0.00022283
  0.14800000   0.00018478
  0.14800000   0.00015323
  0.14820000   0.00960426
  0.14820000   0.00796828
  0.14820000   0.00661099
  0.14820000   0.00548491
  0.14820000   0.00455065
  0.14820000   0.00377553
  0.14820000   0.00313245
  0.14820000   0.00259891
  0.14820000   0.00215626
  0.14820000   0.00178901
  0.14820000   0.00148431
  0.14820000   0.00123152
  0.14820000   0.00102178
  0.14820000   0.00084777
  0.14820000   0.00070341
  0.14820000   0.00058363
  0.14820000   0.00048425
  0.14820000   0.00040180
  0.14820000   0.00033340
  0.14820000   0.00027664
  0.14820000   0.00022955
  0.14820000   0.00019048
  0.14820000   0.00015807
  0.14840000   0.00976213
  0.14840000   0.00810472
  0.14840000   0.00672871
  0.14840000   0.00558634
  0.14840000   0.00463792
  0.14840000   0.00385053
  0.14840000   0.00319683
  0.14840000   0.00265411
  0.14840000   0.00220353
  0.14840000   0.00182946
  0.14840000   0.00151890
  0.14840000   0.00126106
  0.14840000   0.00104700
  0.14840000   0.00086928
  0.14840000   0.00072173
  0.14840000   0.00059924
  0.14840000   0.00049754
  0.14840000   0.00041310
  0.14840000   0.00034300
  0.14840000   0.00028480
  0.14840000   0.00023648
  0.14840000   0.00019637
  0.14840000   0.00016306
  0.14860000   0.00992260
  0.14860000   0.00824349
  0.14860000   0.00684854
  0.14860000   0.00568965
  0.14860000   0.00472687
  0.14860000   0.00392702
  0.14860000   0.00326253
  0.14860000   0.00271048
  0.14860000   0.00225185
  0.14860000   0.00187083
  0.14860000   0.00155429
  0.14860000   0.00129131
  0.14860000   0.00107284
  0.14860000   0.00089133
  0.14860000   0.00074054
  0.14860000   0.00061526
  0.14860000   0.00051119
  0.14860000   0.00042472
  0.14860000   0.00035288
  0.14860000   0.00029320
  0.14860000   0.00024362
  0.14860000   0.00020243
  0.14860000   0.00016821
  0.14880000   0.01008571
  0.14880000   0.00838464
  0.14880000   0.00697049
  0.14880000   0.00579487
  0.14880000   0.00481753
  0.14880000   0.00400503
  0.14880000   0.00332958
  0.14880000   0.00276805
  0.14880000   0.00230123
  0.14880000   0.00191314
  0.14880000   0.00159051
  0.14880000   0.00132229
  0.14880000   0.00109931
  0.14880000   0.00091394
  0.14880000   0.00075984
  0.14880000   0.00063172
  0.14880000   0.00052521
  0.14880000   0.00043666
  0.14880000   0.00036305
  0.14880000   0.00030185
  0.14880000   0.00025098
  0.14880000   0.00020868
  0.14880000   0.00017352
  0.14900000   0.01025150
  0.14900000   0.00852822
  0.14900000   0.00709463
  0.14900000   0.00590204
  0.14900000   0.00490993
  0.14900000   0.00408460
  0.14900000   0.00339801
  0.14900000   0.00282684
  0.14900000   0.00235168
  0.14900000   0.00195640
  0.14900000   0.00162757
  0.14900000   0.00135402
  0.14900000   0.00112645
  0.14900000   0.00093713
  0.14900000   0.00077964
  0.14900000   0.00064862
  0.14900000   0.00053962
  0.14900000   0.00044895
  0.14900000   0.00037351
  0.14900000   0.00031076
  0.14900000   0.00025855
  0.14900000   0.00021512
  0.14900000   0.00017899
  0.14920000   0.01042002
  0.14920000   0.00867425
  0.14920000   0.00722097
  0.14920000   0.00601119
  0.14920000   0.00500410
  0.14920000   0.00416574
  0.14920000   0.00346785
  0.14920000   0.00288688
  0.14920000   0.00240325
  0.14920000   0.00200065
  0.14920000   0.00166550
  0.14920000   0.00138650
  0.14920000   0.00115425
  0.14920000   0.00096090
  0.14920000   0.00079995
  0.14920000   0.00066597
  0.14920000   0.00055443
  0.14920000   0.00046157
  0.14920000   0.00038428
  0.14920000   0.00031993
  0.14920000   0.00026636
  0.14920000   0.00022177
  0.14920000   0.00018464
  0.14940000   0.01059132
  0.14940000   0.00882278
  0.14940000   0.00734957
  0.14940000   0.00612236
  0.14940000   0.00510008
  0.14940000   0.00424850
  0.14940000   0.00353912
  0.14940000   0.00294820
  0.14940000   0.00245595
  0.14940000   0.00204590
  0.14940000   0.00170431
  0.14940000   0.00141977
  0.14940000   0.00118274
  0.14940000   0.00098528
  0.14940000   0.00082080
  0.14940000   0.00068378
  0.14940000   0.00056964
  0.14940000   0.00047456
  0.14940000   0.00039535
  0.14940000   0.00032937
  0.14940000   0.00027440
  0.14940000   0.00022862
  0.14940000   0.00019047
  0.14960000   0.01076543
  0.14960000   0.00897386
  0.14960000   0.00748046
  0.14960000   0.00623559
  0.14960000   0.00519790
  0.14960000   0.00433291
  0.14960000   0.00361187
  0.14960000   0.00301082
  0.14960000   0.00250981
  0.14960000   0.00209217
  0.14960000   0.00174403
  0.14960000   0.00145383
  0.14960000   0.00121193
  0.14960000   0.00101028
  0.14960000   0.00084219
  0.14960000   0.00070207
  0.14960000   0.00058527
  0.14960000   0.00048791
  0.14960000   0.00040674
  0.14960000   0.00033909
  0.14960000   0.00028269
  0.14960000   0.00023568
  0.14960000   0.00019649
  0.14980000   0.01094241
  0.14980000   0.00912754
  0.14980000   0.00761368
  0.14980000   0.00635092
  0.14980000   0.00529760
  0.14980000   0.00441899
  0.14980000   0.00368611
  0.14980000   0.00307478
  0.14980000   0.00256484
  0.14980000   0.00213949
  0.14980000   0.00178468
  0.14980000   0.00148872
  0.14980000   0.00124184
  0.14980000   0.00103591
  0.14980000   0.00086414
  0.14980000   0.00072085
  0.14980000   0.00060133
  0.14980000   0.00050163
  0.14980000   0.00041847
  0.14980000   0.00034909
  0.14980000   0.00029123
  0.14980000   0.00024296
  0.14980000   0.00020269
  0.15000000   0.01112230
  0.15000000   0.00928384
  0.15000000   0.00774928
  0.15000000   0.00646838
  0.15000000   0.00539922
  0.15000000   0.00450679
  0.15000000   0.00376187
  0.15000000   0.00314009
  0.15000000   0.00262109
  0.15000000   0.00218788
  0.15000000   0.00182627
  0.15000000   0.00152444
  0.15000000   0.00127249
  0.15000000   0.00106220
  0.15000000   0.00088666
  0.15000000   0.00074014
  0.15000000   0.00061783
  0.15000000   0.00051574
  0.15000000   0.00043053
  0.15000000   0.00035940
  0.15000000   0.00030002
  0.15000000   0.00025046
  0.15000000   0.00020909
  0.15020000   0.01130516
  0.15020000   0.00944283
  0.15020000   0.00788730
  0.15020000   0.00658802
  0.15020000   0.00550279
  0.15020000   0.00459633
  0.15020000   0.00383920
  0.15020000   0.00320680
  0.15020000   0.00267857
  0.15020000   0.00223736
  0.15020000   0.00186884
  0.15020000   0.00156102
  0.15020000   0.00130391
  0.15020000   0.00108915
  0.15020000   0.00090977
  0.15020000   0.00075994
  0.15020000   0.00063479
  0.15020000   0.00053025
  0.15020000   0.00044294
  0.15020000   0.00037000
  0.15020000   0.00030908
  0.15020000   0.00025820
  0.15020000   0.00021570
  0.15040000   0.01149102
  0.15040000   0.00960454
  0.15040000   0.00802777
  0.15040000   0.00670987
  0.15040000   0.00560834
  0.15040000   0.00468765
  0.15040000   0.00391812
  0.15040000   0.00327492
  0.15040000   0.00273731
  0.15040000   0.00228797
  0.15040000   0.00191239
  0.15040000   0.00159847
  0.15040000   0.00133609
  0.15040000   0.00111678
  0.15040000   0.00093348
  0.15040000   0.00078027
  0.15040000   0.00065221
  0.15040000   0.00054517
  0.15040000   0.00045570
  0.15040000   0.00038092
  0.15040000   0.00031842
  0.15040000   0.00026618
  0.15040000   0.00022251
  0.15060000   0.01167994
  0.15060000   0.00976902
  0.15060000   0.00817075
  0.15060000   0.00683398
  0.15060000   0.00571592
  0.15060000   0.00478079
  0.15060000   0.00399866
  0.15060000   0.00334449
  0.15060000   0.00279735
  0.15060000   0.00233972
  0.15060000   0.00195697
  0.15060000   0.00163683
  0.15060000   0.00136907
  0.15060000   0.00114512
  0.15060000   0.00095781
  0.15060000   0.00080114
  0.15060000   0.00067011
  0.15060000   0.00056051
  0.15060000   0.00046884
  0.15060000   0.00039217
  0.15060000   0.00032804
  0.15060000   0.00027440
  0.15060000   0.00022954
  0.15080000   0.01187196
  0.15080000   0.00993632
  0.15080000   0.00831628
  0.15080000   0.00696039
  0.15080000   0.00582557
  0.15080000   0.00487578
  0.15080000   0.00408086
  0.15080000   0.00341554
  0.15080000   0.00285870
  0.15080000   0.00239264
  0.15080000   0.00200258
  0.15080000   0.00167611
  0.15080000   0.00140287
  0.15080000   0.00117418
  0.15080000   0.00098278
  0.15080000   0.00082258
  0.15080000   0.00068850
  0.15080000   0.00057628
  0.15080000   0.00048235
  0.15080000   0.00040374
  0.15080000   0.00033795
  0.15080000   0.00028288
  0.15080000   0.00023679
  0.15100000   0.01206715
  0.15100000   0.01010649
  0.15100000   0.00846440
  0.15100000   0.00708914
  0.15100000   0.00593733
  0.15100000   0.00497267
  0.15100000   0.00416475
  0.15100000   0.00348810
  0.15100000   0.00292139
  0.15100000   0.00244677
  0.15100000   0.00204926
  0.15100000   0.00171633
  0.15100000   0.00143750
  0.15100000   0.00120398
  0.15100000   0.00100839
  0.15100000   0.00084459
  0.15100000   0.00070739
  0.15100000   0.00059249
  0.15100000   0.00049626
  0.15100000   0.00041566
  0.15100000   0.00034816
  0.15100000   0.00029162
  0.15100000   0.00024427
  0.15120000   0.01226555
  0.15120000   0.01027957
  0.15120000   0.00861517
  0.15120000   0.00722027
  0.15120000   0.00605122
  0.15120000   0.00507147
  0.15120000   0.00425036
  0.15120000   0.00356220
  0.15120000   0.00298547
  0.15120000   0.00250211
  0.15120000   0.00209702
  0.15120000   0.00175752
  0.15120000   0.00147299
  0.15120000   0.00123453
  0.15120000   0.00103468
  0.15120000   0.00086719
  0.15120000   0.00072681
  0.15120000   0.00060916
  0.15120000   0.00051056
  0.15120000   0.00042793
  0.15120000   0.00035867
  0.15120000   0.00030063
  0.15120000   0.00025198
  0.15140000   0.01246722
  0.15140000   0.01045563
  0.15140000   0.00876862
  0.15140000   0.00735382
  0.15140000   0.00616731
  0.15140000   0.00517225
  0.15140000   0.00433774
  0.15140000   0.00363788
  0.15140000   0.00305095
  0.15140000   0.00255872
  0.15140000   0.00214591
  0.15140000   0.00179970
  0.15140000   0.00150936
  0.15140000   0.00126586
  0.15140000   0.00106165
  0.15140000   0.00089039
  0.15140000   0.00074676
  0.15140000   0.00062630
  0.15140000   0.00052528
  0.15140000   0.00044056
  0.15140000   0.00036951
  0.15140000   0.00030992
  0.15140000   0.00025994
  0.15160000   0.01267220
  0.15160000   0.01063470
  0.15160000   0.00892481
  0.15160000   0.00748985
  0.15160000   0.00628563
  0.15160000   0.00527502
  0.15160000   0.00442692
  0.15160000   0.00371517
  0.15160000   0.00311787
  0.15160000   0.00261660
  0.15160000   0.00219593
  0.15160000   0.00184289
  0.15160000   0.00154662
  0.15160000   0.00129799
  0.15160000   0.00108933
  0.15160000   0.00091422
  0.15160000   0.00076726
  0.15160000   0.00064393
  0.15160000   0.00054043
  0.15160000   0.00045357
  0.15160000   0.00038067
  0.15160000   0.00031950
  0.15160000   0.00026816
  0.15180000   0.01288056
  0.15180000   0.01081684
  0.15180000   0.00908378
  0.15180000   0.00762840
  0.15180000   0.00640621
  0.15180000   0.00537985
  0.15180000   0.00451793
  0.15180000   0.00379410
  0.15180000   0.00318625
  0.15180000   0.00267579
  0.15180000   0.00224712
  0.15180000   0.00188712
  0.15180000   0.00158481
  0.15180000   0.00133093
  0.15180000   0.00111772
  0.15180000   0.00093868
  0.15180000   0.00078832
  0.15180000   0.00066205
  0.15180000   0.00055601
  0.15180000   0.00046696
  0.15180000   0.00039217
  0.15180000   0.00032937
  0.15180000   0.00027663
  0.15200000   0.01309234
  0.15200000   0.01100210
  0.15200000   0.00924559
  0.15200000   0.00776952
  0.15200000   0.00652912
  0.15200000   0.00548675
  0.15200000   0.00461081
  0.15200000   0.00387471
  0.15200000   0.00325614
  0.15200000   0.00273633
  0.15200000   0.00229950
  0.15200000   0.00193242
  0.15200000   0.00162394
  0.15200000   0.00136471
  0.15200000   0.00114686
  0.15200000   0.00096380
  0.15200000   0.00080996
  0.15200000   0.00068068
  0.15200000   0.00057204
  0.15200000   0.00048074
  0.15200000   0.00040402
  0.15200000   0.00033955
  0.15200000   0.00028537
  0.15220000   0.01330761
  0.15220000   0.01119054
  0.15220000   0.00941028
  0.15220000   0.00791325
  0.15220000   0.00665438
  0.15220000   0.00559579
  0.15220000   0.00470560
  0.15220000   0.00395704
  0.15220000   0.00332756
  0.15220000   0.00279823
  0.15220000   0.00235311
  0.15220000   0.00197880
  0.15220000   0.00166403
  0.15220000   0.00139934
  0.15220000   0.00117676
  0.15220000   0.00098959
  0.15220000   0.00083219
  0.15220000   0.00069984
  0.15220000   0.00058853
  0.15220000   0.00049494
  0.15220000   0.00041623
  0.15220000   0.00035004
  0.15220000   0.00029439
  0.15240000   0.01352642
  0.15240000   0.01138221
  0.15240000   0.00957791
  0.15240000   0.00805963
  0.15240000   0.00678205
  0.15240000   0.00570699
  0.15240000   0.00480235
  0.15240000   0.00404112
  0.15240000   0.00340055
  0.15240000   0.00286154
  0.15240000   0.00240796
  0.15240000   0.00202629
  0.15240000   0.00170512
  0.15240000   0.00143486
  0.15240000   0.00120744
  0.15240000   0.00101607
  0.15240000   0.00085504
  0.15240000   0.00071953
  0.15240000   0.00060550
  0.15240000   0.00050955
  0.15240000   0.00042881
  0.15240000   0.00036086
  0.15240000   0.00030369
  0.15260000   0.01374884
  0.15260000   0.01157716
  0.15260000   0.00974852
  0.15260000   0.00820873
  0.15260000   0.00691217
  0.15260000   0.00582040
  0.15260000   0.00490108
  0.15260000   0.00412698
  0.15260000   0.00347515
  0.15260000   0.00292628
  0.15260000   0.00246410
  0.15260000   0.00207493
  0.15260000   0.00174722
  0.15260000   0.00147128
  0.15260000   0.00123892
  0.15260000   0.00104327
  0.15260000   0.00087851
  0.15260000   0.00073978
  0.15260000   0.00062296
  0.15260000   0.00052460
  0.15260000   0.00044177
  0.15260000   0.00037202
  0.15260000   0.00031329
  0.15280000   0.01397491
  0.15280000   0.01177546
  0.15280000   0.00992218
  0.15280000   0.00836059
  0.15280000   0.00704478
  0.15280000   0.00593607
  0.15280000   0.00500185
  0.15280000   0.00421467
  0.15280000   0.00355138
  0.15280000   0.00299248
  0.15280000   0.00252155
  0.15280000   0.00212473
  0.15280000   0.00179037
  0.15280000   0.00150862
  0.15280000   0.00127123
  0.15280000   0.00107119
  0.15280000   0.00090263
  0.15280000   0.00076060
  0.15280000   0.00064093
  0.15280000   0.00054009
  0.15280000   0.00045512
  0.15280000   0.00038352
  0.15280000   0.00032319
  0.15300000   0.01420471
  0.15300000   0.01197715
  0.15300000   0.01009893
  0.15300000   0.00851526
  0.15300000   0.00717995
  0.15300000   0.00605404
  0.15300000   0.00510469
  0.15300000   0.00430422
  0.15300000   0.00362928
  0.15300000   0.00306019
  0.15300000   0.00258033
  0.15300000   0.00217573
  0.15300000   0.00183458
  0.15300000   0.00154692
  0.15300000   0.00130437
  0.15300000   0.00109986
  0.15300000   0.00092741
  0.15300000   0.00078201
  0.15300000   0.00065941
  0.15300000   0.00055604
  0.15300000   0.00046887
  0.15300000   0.00039537
  0.15300000   0.00033340
  0.15320000   0.01443828
  0.15320000   0.01218231
  0.15320000   0.01027884
  0.15320000   0.00867280
  0.15320000   0.00731771
  0.15320000   0.00617435
  0.15320000   0.00520965
  0.15320000   0.00439568
  0.15320000   0.00370890
  0.15320000   0.00312943
  0.15320000   0.00264049
  0.15320000   0.00222796
  0.15320000   0.00187988
  0.15320000   0.00158618
  0.15320000   0.00133838
  0.15320000   0.00112929
  0.15320000   0.00095288
  0.15320000   0.00080402
  0.15320000   0.00067843
  0.15320000   0.00057246
  0.15320000   0.00048304
  0.15320000   0.00040759
  0.15320000   0.00034394
  0.15340000   0.01467570
  0.15340000   0.01239098
  0.15340000   0.01046195
  0.15340000   0.00883325
  0.15340000   0.00745811
  0.15340000   0.00629706
  0.15340000   0.00531677
  0.15340000   0.00448909
  0.15340000   0.00379026
  0.15340000   0.00320023
  0.15340000   0.00270206
  0.15340000   0.00228144
  0.15340000   0.00192630
  0.15340000   0.00162645
  0.15340000   0.00137328
  0.15340000   0.00115952
  0.15340000   0.00097904
  0.15340000   0.00082666
  0.15340000   0.00069799
  0.15340000   0.00058936
  0.15340000   0.00049764
  0.15340000   0.00042020
  0.15340000   0.00035481
  0.15360000   0.01491703
  0.15360000   0.01260322
  0.15360000   0.01064833
  0.15360000   0.00899667
  0.15360000   0.00760122
  0.15360000   0.00642221
  0.15360000   0.00542609
  0.15360000   0.00458448
  0.15360000   0.00387341
  0.15360000   0.00327264
  0.15360000   0.00276506
  0.15360000   0.00233620
  0.15360000   0.00197387
  0.15360000   0.00166774
  0.15360000   0.00140909
  0.15360000   0.00119056
  0.15360000   0.00100592
  0.15360000   0.00084992
  0.15360000   0.00071812
  0.15360000   0.00060677
  0.15360000   0.00051268
  0.15360000   0.00043319
  0.15360000   0.00036602
  0.15380000   0.01516233
  0.15380000   0.01281911
  0.15380000   0.01083803
  0.15380000   0.00916312
  0.15380000   0.00774707
  0.15380000   0.00654985
  0.15380000   0.00553766
  0.15380000   0.00468190
  0.15380000   0.00395839
  0.15380000   0.00334669
  0.15380000   0.00282953
  0.15380000   0.00239228
  0.15380000   0.00202261
  0.15380000   0.00171007
  0.15380000   0.00144583
  0.15380000   0.00122242
  0.15380000   0.00103354
  0.15380000   0.00087385
  0.15380000   0.00073884
  0.15380000   0.00062469
  0.15380000   0.00052818
  0.15380000   0.00044658
  0.15380000   0.00037759
  0.15400000   0.01541166
  0.15400000   0.01303869
  0.15400000   0.01103111
  0.15400000   0.00933265
  0.15400000   0.00789572
  0.15400000   0.00668003
  0.15400000   0.00565153
  0.15400000   0.00478139
  0.15400000   0.00404523
  0.15400000   0.00342242
  0.15400000   0.00289550
  0.15400000   0.00244971
  0.15400000   0.00207256
  0.15400000   0.00175348
  0.15400000   0.00148353
  0.15400000   0.00125515
  0.15400000   0.00106192
  0.15400000   0.00089845
  0.15400000   0.00076014
  0.15400000   0.00064313
  0.15400000   0.00054414
  0.15400000   0.00046039
  0.15400000   0.00038953
  0.15420000   0.01566510
  0.15420000   0.01326204
  0.15420000   0.01122764
  0.15420000   0.00950532
  0.15420000   0.00804722
  0.15420000   0.00681280
  0.15420000   0.00576774
  0.15420000   0.00488300
  0.15420000   0.00413398
  0.15420000   0.00349986
  0.15420000   0.00296301
  0.15420000   0.00250852
  0.15420000   0.00212375
  0.15420000   0.00179800
  0.15420000   0.00152222
  0.15420000   0.00128874
  0.15420000   0.00109108
  0.15420000   0.00092374
  0.15420000   0.00078207
  0.15420000   0.00066213
  0.15420000   0.00056059
  0.15420000   0.00047462
  0.15420000   0.00040184
  0.15440000   0.01592270
  0.15440000   0.01348922
  0.15440000   0.01142766
  0.15440000   0.00968119
  0.15440000   0.00820163
  0.15440000   0.00694821
  0.15440000   0.00588634
  0.15440000   0.00498677
  0.15440000   0.00422468
  0.15440000   0.00357906
  0.15440000   0.00303210
  0.15440000   0.00256874
  0.15440000   0.00217620
  0.15440000   0.00184365
  0.15440000   0.00156192
  0.15440000   0.00132324
  0.15440000   0.00112104
  0.15440000   0.00094975
  0.15440000   0.00080463
  0.15440000   0.00068169
  0.15440000   0.00057753
  0.15440000   0.00048930
  0.15440000   0.00041455
  0.15460000   0.01618455
  0.15460000   0.01372029
  0.15460000   0.01163126
  0.15460000   0.00986031
  0.15460000   0.00835901
  0.15460000   0.00708631
  0.15460000   0.00600739
  0.15460000   0.00509274
  0.15460000   0.00431736
  0.15460000   0.00366004
  0.15460000   0.00310281
  0.15460000   0.00263041
  0.15460000   0.00222995
  0.15460000   0.00189045
  0.15460000   0.00160265
  0.15460000   0.00135866
  0.15460000   0.00115183
  0.15460000   0.00097648
  0.15460000   0.00082784
  0.15460000   0.00070182
  0.15460000   0.00059499
  0.15460000   0.00050443
  0.15460000   0.00042765
  0.15480000   0.01645071
  0.15480000   0.01395533
  0.15480000   0.01183848
  0.15480000   0.01004275
  0.15480000   0.00851942
  0.15480000   0.00722716
  0.15480000   0.00613092
  0.15480000   0.00520097
  0.15480000   0.00441209
  0.15480000   0.00374287
  0.15480000   0.00317516
  0.15480000   0.00269356
  0.15480000   0.00228502
  0.15480000   0.00193845
  0.15480000   0.00164444
  0.15480000   0.00139504
  0.15480000   0.00118346
  0.15480000   0.00100398
  0.15480000   0.00085172
  0.15480000   0.00072255
  0.15480000   0.00061298
  0.15480000   0.00052003
  0.15480000   0.00044117
  0.15500000   0.01672124
  0.15500000   0.01419439
  0.15500000   0.01204940
  0.15500000   0.01022857
  0.15500000   0.00868290
  0.15500000   0.00737081
  0.15500000   0.00625700
  0.15500000   0.00531151
  0.15500000   0.00450889
  0.15500000   0.00382757
  0.15500000   0.00324920
  0.15500000   0.00275823
  0.15500000   0.00234146
  0.15500000   0.00198766
  0.15500000   0.00168733
  0.15500000   0.00143238
  0.15500000   0.00121596
  0.15500000   0.00103224
  0.15500000   0.00087628
  0.15500000   0.00074389
  0.15500000   0.00063151
  0.15500000   0.00053611
  0.15500000   0.00045512
  0.15520000   0.01699623
  0.15520000   0.01443755
  0.15520000   0.01226408
  0.15520000   0.01041783
  0.15520000   0.00884952
  0.15520000   0.00751732
  0.15520000   0.00638567
  0.15520000   0.00542439
  0.15520000   0.00460782
  0.15520000   0.00391418
  0.15520000   0.00332497
  0.15520000   0.00282445
  0.15520000   0.00239929
  0.15520000   0.00203813
  0.15520000   0.00173134
  0.15520000   0.00147073
  0.15520000   0.00124935
  0.15520000   0.00106130
  0.15520000   0.00090156
  0.15520000   0.00076587
  0.15520000   0.00065060
  0.15520000   0.00055269
  0.15520000   0.00046951
  0.15540000   0.01727574
  0.15540000   0.01468488
  0.15540000   0.01248259
  0.15540000   0.01061059
  0.15540000   0.00901934
  0.15540000   0.00766674
  0.15540000   0.00651699
  0.15540000   0.00553967
  0.15540000   0.00470892
  0.15540000   0.00400276
  0.15540000   0.00340250
  0.15540000   0.00289227
  0.15540000   0.00245855
  0.15540000   0.00208988
  0.15540000   0.00177649
  0.15540000   0.00151010
  0.15540000   0.00128367
  0.15540000   0.00109119
  0.15540000   0.00092757
  0.15540000   0.00078849
  0.15540000   0.00067027
  0.15540000   0.00056978
  0.15540000   0.00048436
  0.15560000   0.01755985
  0.15560000   0.01493645
  0.15560000   0.01270499
  0.15560000   0.01080692
  0.15560000   0.00919242
  0.15560000   0.00781913
  0.15560000   0.00665101
  0.15560000   0.00565741
  0.15560000   0.00481224
  0.15560000   0.00409335
  0.15560000   0.00348185
  0.15560000   0.00296171
  0.15560000   0.00251928
  0.15560000   0.00214294
  0.15560000   0.00182282
  0.15560000   0.00155053
  0.15560000   0.00131892
  0.15560000   0.00112191
  0.15560000   0.00095433
  0.15560000   0.00081179
  0.15560000   0.00069054
  0.15560000   0.00058740
  0.15560000   0.00049967
  0.15580000   0.01784864
  0.15580000   0.01519233
  0.15580000   0.01293136
  0.15580000   0.01100689
  0.15580000   0.00936883
  0.15580000   0.00797456
  0.15580000   0.00678779
  0.15580000   0.00577765
  0.15580000   0.00491783
  0.15580000   0.00418598
  0.15580000   0.00356305
  0.15580000   0.00303282
  0.15580000   0.00258150
  0.15580000   0.00219735
  0.15580000   0.00187037
  0.15580000   0.00159205
  0.15580000   0.00135515
  0.15580000   0.00115350
  0.15580000   0.00098186
  0.15580000   0.00083577
  0.15580000   0.00071142
  0.15580000   0.00060557
  0.15580000   0.00051547
  0.15600000   0.01814218
  0.15600000   0.01545260
  0.15600000   0.01316176
  0.15600000   0.01121055
  0.15600000   0.00954862
  0.15600000   0.00813308
  0.15600000   0.00692739
  0.15600000   0.00590044
  0.15600000   0.00502574
  0.15600000   0.00428072
  0.15600000   0.00364614
  0.15600000   0.00310564
  0.15600000   0.00264527
  0.15600000   0.00225314
  0.15600000   0.00191915
  0.15600000   0.00163467
  0.15600000   0.00139237
  0.15600000   0.00118598
  0.15600000   0.00101019
  0.15600000   0.00086046
  0.15600000   0.00073293
  0.15600000   0.00062430
  0.15600000   0.00053177
  0.15620000   0.01844055
  0.15620000   0.01571732
  0.15620000   0.01339627
  0.15620000   0.01141799
  0.15620000   0.00973187
  0.15620000   0.00829475
  0.15620000   0.00706985
  0.15620000   0.00602585
  0.15620000   0.00513602
  0.15620000   0.00437760
  0.15620000   0.00373117
  0.15620000   0.00318021
  0.15620000   0.00271061
  0.15620000   0.00231036
  0.15620000   0.00196921
  0.15620000   0.00167844
  0.15620000   0.00143061
  0.15620000   0.00121938
  0.15620000   0.00103933
  0.15620000   0.00088588
  0.15620000   0.00075509
  0.15620000   0.00064361
  0.15620000   0.00054859
  0.15640000   0.01874383
  0.15640000   0.01598659
  0.15640000   0.01363496
  0.15640000   0.01162928
  0.15640000   0.00991863
  0.15640000   0.00845963
  0.15640000   0.00721525
  0.15640000   0.00615393
  0.15640000   0.00524872
  0.15640000   0.00447667
  0.15640000   0.00381819
  0.15640000   0.00325657
  0.15640000   0.00277757
  0.15640000   0.00236902
  0.15640000   0.00202057
  0.15640000   0.00172338
  0.15640000   0.00146990
  0.15640000   0.00125371
  0.15640000   0.00106932
  0.15640000   0.00091205
  0.15640000   0.00077792
  0.15640000   0.00066351
  0.15640000   0.00056594
  0.15660000   0.01905210
  0.15660000   0.01626047
  0.15660000   0.01387791
  0.15660000   0.01184447
  0.15660000   0.01010898
  0.15660000   0.00862780
  0.15660000   0.00736365
  0.15660000   0.00628473
  0.15660000   0.00536390
  0.15660000   0.00457799
  0.15660000   0.00390724
  0.15660000   0.00333477
  0.15660000   0.00284618
  0.15660000   0.00242918
  0.15660000   0.00207328
  0.15660000   0.00176953
  0.15660000   0.00151028
  0.15660000   0.00128902
  0.15660000   0.00110017
  0.15660000   0.00093900
  0.15660000   0.00080144
  0.15660000   0.00068404
  0.15660000   0.00058384
  0.15680000   0.01936544
  0.15680000   0.01653905
  0.15680000   0.01412519
  0.15680000   0.01206364
  0.15680000   0.01030299
  0.15680000   0.00879931
  0.15680000   0.00751509
  0.15680000   0.00641831
  0.15680000   0.00548160
  0.15680000   0.00468160
  0.15680000   0.00399837
  0.15680000   0.00341484
  0.15680000   0.00291649
  0.15680000   0.00249086
  0.15680000   0.00212736
  0.15680000   0.00181691
  0.15680000   0.00155176
  0.15680000   0.00132532
  0.15680000   0.00113192
  0.15680000   0.00096674
  0.15680000   0.00082568
  0.15680000   0.00070520
  0.15680000   0.00060230
  0.15700000   0.01968394
  0.15700000   0.01682240
  0.15700000   0.01437688
  0.15700000   0.01228688
  0.15700000   0.01050072
  0.15700000   0.00897423
  0.15700000   0.00766966
  0.15700000   0.00655473
  0.15700000   0.00560189
  0.15700000   0.00478756
  0.15700000   0.00409162
  0.15700000   0.00349684
  0.15700000   0.00298853
  0.15700000   0.00255412
  0.15700000   0.00218285
  0.15700000   0.00186556
  0.15700000   0.00159439
  0.15700000   0.00136264
  0.15700000   0.00116458
  0.15700000   0.00099531
  0.15700000   0.00085065
  0.15700000   0.00072701
  0.15700000   0.00062135
  0.15720000   0.02000768
  0.15720000   0.01711061
  0.15720000   0.01463305
  0.15720000   0.01251425
  0.15720000   0.01070225
  0.15720000   0.00915263
  0.15720000   0.00782740
  0.15720000   0.00669406
  0.15720000   0.00572482
  0.15720000   0.00489592
  0.15720000   0.00418705
  0.15720000   0.00358081
  0.15720000   0.00306236
  0.15720000   0.00261898
  0.15720000   0.00223979
  0.15720000   0.00191551
  0.15720000   0.00163819
  0.15720000   0.00140101
  0.15720000   0.00119818
  0.15720000   0.00102472
  0.15720000   0.00087637
  0.15720000   0.00074950
  0.15720000   0.00064100
  0.15740000   0.02033674
  0.15740000   0.01740376
  0.15740000   0.01489379
  0.15740000   0.01274583
  0.15740000   0.01090765
  0.15740000   0.00933458
  0.15740000   0.00798839
  0.15740000   0.00683634
  0.15740000   0.00585045
  0.15740000   0.00500674
  0.15740000   0.00428470
  0.15740000   0.00366680
  0.15740000   0.00313801
  0.15740000   0.00268549
  0.15740000   0.00229822
  0.15740000   0.00196681
  0.15740000   0.00168319
  0.15740000   0.00144047
  0.15740000   0.00123276
  0.15740000   0.00105500
  0.15740000   0.00090287
  0.15740000   0.00077269
  0.15740000   0.00066128
  0.15760000   0.02067122
  0.15760000   0.01770193
  0.15760000   0.01515918
  0.15760000   0.01298169
  0.15760000   0.01111700
  0.15760000   0.00952015
  0.15760000   0.00815269
  0.15760000   0.00698166
  0.15760000   0.00597883
  0.15760000   0.00512006
  0.15760000   0.00438464
  0.15760000   0.00375486
  0.15760000   0.00321554
  0.15760000   0.00275369
  0.15760000   0.00235818
  0.15760000   0.00201947
  0.15760000   0.00172943
  0.15760000   0.00148104
  0.15760000   0.00126833
  0.15760000   0.00108617
  0.15760000   0.00093018
  0.15760000   0.00079659
  0.15760000   0.00068220
  0.15780000   0.02101120
  0.15780000   0.01800521
  0.15780000   0.01542930
  0.15780000   0.01322193
  0.15780000   0.01133036
  0.15780000   0.00970942
  0.15780000   0.00832038
  0.15780000   0.00713006
  0.15780000   0.00611004
  0.15780000   0.00523595
  0.15780000   0.00448691
  0.15780000   0.00384503
  0.15780000   0.00329498
  0.15780000   0.00282362
  0.15780000   0.00241969
  0.15780000   0.00207355
  0.15780000   0.00177693
  0.15780000   0.00152275
  0.15780000   0.00130493
  0.15780000   0.00111827
  0.15780000   0.00095831
  0.15780000   0.00082124
  0.15780000   0.00070377
  0.15800000   0.02135678
  0.15800000   0.01831370
  0.15800000   0.01570424
  0.15800000   0.01346661
  0.15800000   0.01154782
  0.15800000   0.00990244
  0.15800000   0.00849151
  0.15800000   0.00728162
  0.15800000   0.00624413
  0.15800000   0.00535446
  0.15800000   0.00459156
  0.15800000   0.00393737
  0.15800000   0.00337638
  0.15800000   0.00289533
  0.15800000   0.00248282
  0.15800000   0.00212908
  0.15800000   0.00182575
  0.15800000   0.00156564
  0.15800000   0.00134258
  0.15800000   0.00115131
  0.15800000   0.00098730
  0.15800000   0.00084665
  0.15800000   0.00072604
  0.15820000   0.02170804
  0.15820000   0.01862746
  0.15820000   0.01598407
  0.15820000   0.01371582
  0.15820000   0.01176946
  0.15820000   0.01009931
  0.15820000   0.00866617
  0.15820000   0.00743641
  0.15820000   0.00638116
  0.15820000   0.00547566
  0.15820000   0.00469866
  0.15820000   0.00403192
  0.15820000   0.00345980
  0.15820000   0.00296886
  0.15820000   0.00254759
  0.15820000   0.00218610
  0.15820000   0.00187591
  0.15820000   0.00160973
  0.15820000   0.00138133
  0.15820000   0.00118534
  0.15820000   0.00101716
  0.15820000   0.00087284
  0.15820000   0.00074900
  0.15840000   0.02206508
  0.15840000   0.01894661
  0.15840000   0.01626890
  0.15840000   0.01396964
  0.15840000   0.01199535
  0.15840000   0.01030009
  0.15840000   0.00884442
  0.15840000   0.00759449
  0.15840000   0.00652120
  0.15840000   0.00559961
  0.15840000   0.00480826
  0.15840000   0.00412875
  0.15840000   0.00354528
  0.15840000   0.00304426
  0.15840000   0.00261405
  0.15840000   0.00224465
  0.15840000   0.00192744
  0.15840000   0.00165507
  0.15840000   0.00142119
  0.15840000   0.00122037
  0.15840000   0.00104792
  0.15840000   0.00089985
  0.15840000   0.00077270
  0.15860000   0.02242800
  0.15860000   0.01927123
  0.15860000   0.01655880
  0.15860000   0.01422817
  0.15860000   0.01222558
  0.15860000   0.01050486
  0.15860000   0.00902634
  0.15860000   0.00775593
  0.15860000   0.00666432
  0.15860000   0.00572636
  0.15860000   0.00492041
  0.15860000   0.00422791
  0.15860000   0.00363287
  0.15860000   0.00312158
  0.15860000   0.00268225
  0.15860000   0.00230476
  0.15860000   0.00198040
  0.15860000   0.00170169
  0.15860000   0.00146221
  0.15860000   0.00125643
  0.15860000   0.00107962
  0.15860000   0.00092769
  0.15860000   0.00079714
  0.15880000   0.02279689
  0.15880000   0.01960141
  0.15880000   0.01685387
  0.15880000   0.01449148
  0.15880000   0.01246023
  0.15880000   0.01071371
  0.15880000   0.00921201
  0.15880000   0.00792080
  0.15880000   0.00681058
  0.15880000   0.00585598
  0.15880000   0.00503519
  0.15880000   0.00432944
  0.15880000   0.00372262
  0.15880000   0.00320086
  0.15880000   0.00275223
  0.15880000   0.00236649
  0.15880000   0.00203481
  0.15880000   0.00174962
  0.15880000   0.00150441
  0.15880000   0.00129356
  0.15880000   0.00111227
  0.15880000   0.00095639
  0.15880000   0.00082236
  0.15900000   0.02317184
  0.15900000   0.01993725
  0.15900000   0.01715420
  0.15900000   0.01475966
  0.15900000   0.01269939
  0.15900000   0.01092671
  0.15900000   0.00940149
  0.15900000   0.00808918
  0.15900000   0.00696005
  0.15900000   0.00598854
  0.15900000   0.00515264
  0.15900000   0.00443342
  0.15900000   0.00381460
  0.15900000   0.00328216
  0.15900000   0.00282404
  0.15900000   0.00242986
  0.15900000   0.00209071
  0.15900000   0.00179890
  0.15900000   0.00154782
  0.15900000   0.00133179
  0.15900000   0.00114592
  0.15900000   0.00098598
  0.15900000   0.00084838
  0.15920000   0.02355297
  0.15920000   0.02027885
  0.15920000   0.01745989
  0.15920000   0.01503281
  0.15920000   0.01294314
  0.15920000   0.01114395
  0.15920000   0.00959488
  0.15920000   0.00826114
  0.15920000   0.00711280
  0.15920000   0.00612410
  0.15920000   0.00527283
  0.15920000   0.00453990
  0.15920000   0.00390885
  0.15920000   0.00336552
  0.15920000   0.00289772
  0.15920000   0.00249494
  0.15920000   0.00214816
  0.15920000   0.00184957
  0.15920000   0.00159250
  0.15920000   0.00137115
  0.15920000   0.00118058
  0.15920000   0.00101649
  0.15920000   0.00087522
  0.15940000   0.02394036
  0.15940000   0.02062630
  0.15940000   0.01777102
  0.15940000   0.01531102
  0.15940000   0.01319157
  0.15940000   0.01136551
  0.15940000   0.00979224
  0.15940000   0.00843676
  0.15940000   0.00726891
  0.15940000   0.00626273
  0.15940000   0.00539583
  0.15940000   0.00464894
  0.15940000   0.00400543
  0.15940000   0.00345100
  0.15940000   0.00297332
  0.15940000   0.00256176
  0.15940000   0.00220718
  0.15940000   0.00190167
  0.15940000   0.00163846
  0.15940000   0.00141168
  0.15940000   0.00121629
  0.15940000   0.00104795
  0.15940000   0.00090291
  0.15960000   0.02433413
  0.15960000   0.02097970
  0.15960000   0.01808770
  0.15960000   0.01559438
  0.15960000   0.01344477
  0.15960000   0.01159148
  0.15960000   0.00999367
  0.15960000   0.00861611
  0.15960000   0.00742845
  0.15960000   0.00640450
  0.15960000   0.00552170
  0.15960000   0.00476059
  0.15960000   0.00410440
  0.15960000   0.00353866
  0.15960000   0.00305090
  0.15960000   0.00263038
  0.15960000   0.00226782
  0.15960000   0.00195524
  0.15960000   0.00168575
  0.15960000   0.00145340
  0.15960000   0.00125308
  0.15960000   0.00108038
  0.15960000   0.00093148
  0.15980000   0.02473437
  0.15980000   0.02133916
  0.15980000   0.01841003
  0.15980000   0.01588298
  0.15980000   0.01370283
  0.15980000   0.01182194
  0.15980000   0.01019924
  0.15980000   0.00879928
  0.15980000   0.00759149
  0.15980000   0.00654948
  0.15980000   0.00565051
  0.15980000   0.00487493
  0.15980000   0.00420581
  0.15980000   0.00362854
  0.15980000   0.00313050
  0.15980000   0.00270083
  0.15980000   0.00233013
  0.15980000   0.00201032
  0.15980000   0.00173440
  0.15980000   0.00149636
  0.15980000   0.00129099
  0.15980000   0.00111381
  0.15980000   0.00096095
  0.16000000   0.02514120
  0.16000000   0.02170478
  0.16000000   0.01873810
  0.16000000   0.01617693
  0.16000000   0.01396584
  0.16000000   0.01205698
  0.16000000   0.01040904
  0.16000000   0.00898634
  0.16000000   0.00775810
  0.16000000   0.00669775
  0.16000000   0.00578232
  0.16000000   0.00499202
  0.16000000   0.00430973
  0.16000000   0.00372071
  0.16000000   0.00321219
  0.16000000   0.00277317
  0.16000000   0.00239416
  0.16000000   0.00206695
  0.16000000   0.00178446
  0.16000000   0.00154059
  0.16000000   0.00133004
  0.16000000   0.00114828
  0.16000000   0.00099135
  0.16020000   0.02555473
  0.16020000   0.02207667
  0.16020000   0.01907202
  0.16020000   0.01647632
  0.16020000   0.01423391
  0.16020000   0.01229670
  0.16020000   0.01062316
  0.16020000   0.00917738
  0.16020000   0.00792838
  0.16020000   0.00684937
  0.16020000   0.00591721
  0.16020000   0.00511192
  0.16020000   0.00441622
  0.16020000   0.00381521
  0.16020000   0.00329600
  0.16020000   0.00284745
  0.16020000   0.00245994
  0.16020000   0.00212518
  0.16020000   0.00183597
  0.16020000   0.00158612
  0.16020000   0.00137028
  0.16020000   0.00118381
  0.16020000   0.00102272
  0.16040000   0.02597505
  0.16040000   0.02245493
  0.16040000   0.01941189
  0.16040000   0.01678125
  0.16040000   0.01450712
  0.16040000   0.01254119
  0.16040000   0.01084168
  0.16040000   0.00937249
  0.16040000   0.00810240
  0.16040000   0.00700443
  0.16040000   0.00605525
  0.16040000   0.00523470
  0.16040000   0.00452535
  0.16040000   0.00391212
  0.16040000   0.00338200
  0.16040000   0.00292372
  0.16040000   0.00252754
  0.16040000   0.00218505
  0.16040000   0.00188897
  0.16040000   0.00163301
  0.16040000   0.00141174
  0.16040000   0.00122045
  0.16040000   0.00105508
  0.16060000   0.02640229
  0.16060000   0.02283967
  0.16060000   0.01975781
  0.16060000   0.01709182
  0.16060000   0.01478558
  0.16060000   0.01279054
  0.16060000   0.01106470
  0.16060000   0.00957174
  0.16060000   0.00828024
  0.16060000   0.00716300
  0.16060000   0.00619651
  0.16060000   0.00536043
  0.16060000   0.00463717
  0.16060000   0.00401150
  0.16060000   0.00347025
  0.16060000   0.00300203
  0.16060000   0.00259699
  0.16060000   0.00224660
  0.16060000   0.00194349
  0.16060000   0.00168128
  0.16060000   0.00145445
  0.16060000   0.00125822
  0.16060000   0.00108847
  0.16080000   0.02683656
  0.16080000   0.02323101
  0.16080000   0.02010991
  0.16080000   0.01740815
  0.16080000   0.01506939
  0.16080000   0.01304485
  0.16080000   0.01129232
  0.16080000   0.00977524
  0.16080000   0.00846198
  0.16080000   0.00732516
  0.16080000   0.00634107
  0.16080000   0.00548919
  0.16080000   0.00475176
  0.16080000   0.00411340
  0.16080000   0.00356080
  0.16080000   0.00308244
  0.16080000   0.00266835
  0.16080000   0.00230989
  0.16080000   0.00199959
  0.16080000   0.00173098
  0.16080000   0.00149845
  0.16080000   0.00129716
  0.16080000   0.00112291
  0.16100000   0.02727796
  0.16100000   0.02362905
  0.16100000   0.02046828
  0.16100000   0.01773033
  0.16100000   0.01535864
  0.16100000   0.01330422
  0.16100000   0.01152461
  0.16100000   0.00998306
  0.16100000   0.00864771
  0.16100000   0.00749099
  0.16100000   0.00648900
  0.16100000   0.00562104
  0.16100000   0.00486918
  0.16100000   0.00421789
  0.16100000   0.00365372
  0.16100000   0.00316501
  0.16100000   0.00274168
  0.16100000   0.00237497
  0.16100000   0.00205731
  0.16100000   0.00178214
  0.16100000   0.00154378
  0.16100000   0.00133730
  0.16100000   0.00115845
  0.16120000   0.02772663
  0.16120000   0.02403391
  0.16120000   0.02083303
  0.16120000   0.01805847
  0.16120000   0.01565345
  0.16120000   0.01356874
  0.16120000   0.01176169
  0.16120000   0.01019530
  0.16120000   0.00883752
  0.16120000   0.00766058
  0.16120000   0.00664038
  0.16120000   0.00575605
  0.16120000   0.00498950
  0.16120000   0.00432503
  0.16120000   0.00374906
  0.16120000   0.00324979
  0.16120000   0.00281702
  0.16120000   0.00244188
  0.16120000   0.00211670
  0.16120000   0.00183482
  0.16120000   0.00159049
  0.16120000   0.00137869
  0.16120000   0.00119510
  0.16140000   0.02818268
  0.16140000   0.02444571
  0.16140000   0.02120429
  0.16140000   0.01839269
  0.16140000   0.01595392
  0.16140000   0.01383853
  0.16140000   0.01200364
  0.16140000   0.01041205
  0.16140000   0.00903150
  0.16140000   0.00783401
  0.16140000   0.00679530
  0.16140000   0.00589431
  0.16140000   0.00511279
  0.16140000   0.00443490
  0.16140000   0.00384689
  0.16140000   0.00333685
  0.16140000   0.00289443
  0.16140000   0.00251067
  0.16140000   0.00217780
  0.16140000   0.00188906
  0.16140000   0.00163861
  0.16140000   0.00142137
  0.16140000   0.00123292
  0.16160000   0.02864623
  0.16160000   0.02486457
  0.16160000   0.02158216
  0.16160000   0.01873310
  0.16160000   0.01626016
  0.16160000   0.01411368
  0.16160000   0.01225057
  0.16160000   0.01063341
  0.16160000   0.00922974
  0.16160000   0.00801137
  0.16160000   0.00695383
  0.16160000   0.00603590
  0.16160000   0.00523914
  0.16160000   0.00454756
  0.16160000   0.00394727
  0.16160000   0.00342623
  0.16160000   0.00297397
  0.16160000   0.00258141
  0.16160000   0.00224067
  0.16160000   0.00194491
  0.16160000   0.00168819
  0.16160000   0.00146536
  0.16160000   0.00127194
  0.16180000   0.02911741
  0.16180000   0.02529060
  0.16180000   0.02196677
  0.16180000   0.01907980
  0.16180000   0.01657227
  0.16180000   0.01439431
  0.16180000   0.01250258
  0.16180000   0.01085949
  0.16180000   0.00943233
  0.16180000   0.00819274
  0.16180000   0.00711606
  0.16180000   0.00618088
  0.16180000   0.00536861
  0.16180000   0.00466308
  0.16180000   0.00405028
  0.16180000   0.00351801
  0.16180000   0.00305570
  0.16180000   0.00265414
  0.16180000   0.00230535
  0.16180000   0.00200240
  0.16180000   0.00173927
  0.16180000   0.00151071
  0.16180000   0.00131220
  0.16200000   0.02959633
  0.16200000   0.02572393
  0.16200000   0.02235823
  0.16200000   0.01943293
  0.16200000   0.01689038
  0.16200000   0.01468051
  0.16200000   0.01275978
  0.16200000   0.01109036
  0.16200000   0.00963937
  0.16200000   0.00837822
  0.16200000   0.00728208
  0.16200000   0.00632935
  0.16200000   0.00550128
  0.16200000   0.00478154
  0.16200000   0.00415598
  0.16200000   0.00361225
  0.16200000   0.00313967
  0.16200000   0.00272892
  0.16200000   0.00237190
  0.16200000   0.00206160
  0.16200000   0.00179189
  0.16200000   0.00155747
  0.16200000   0.00135372
  0.16220000   0.03008313
  0.16220000   0.02616469
  0.16220000   0.02275667
  0.16220000   0.01979259
  0.16220000   0.01721460
  0.16220000   0.01497241
  0.16220000   0.01302228
  0.16220000   0.01132615
  0.16220000   0.00985096
  0.16220000   0.00856790
  0.16220000   0.00745197
  0.16220000   0.00648139
  0.16220000   0.00563723
  0.16220000   0.00490301
  0.16220000   0.00426443
  0.16220000   0.00370902
  0.16220000   0.00322595
  0.16220000   0.00280580
  0.16220000   0.00244038
  0.16220000   0.00212255
  0.16220000   0.00184611
  0.16220000   0.00160568
  0.16220000   0.00139657
  0.16240000   0.03057794
  0.16240000   0.02661300
  0.16240000   0.02316221
  0.16240000   0.02015890
  0.16240000   0.01754504
  0.16240000   0.01527011
  0.16240000   0.01329017
  0.16240000   0.01156696
  0.16240000   0.01006719
  0.16240000   0.00876188
  0.16240000   0.00762583
  0.16240000   0.00663708
  0.16240000   0.00577654
  0.16240000   0.00502757
  0.16240000   0.00437572
  0.16240000   0.00380838
  0.16240000   0.00331461
  0.16240000   0.00288486
  0.16240000   0.00251083
  0.16240000   0.00218530
  0.16240000   0.00190197
  0.16240000   0.00165538
  0.16240000   0.00144077
  0.16260000   0.03108088
  0.16260000   0.02706898
  0.16260000   0.02357498
  0.16260000   0.02053200
  0.16260000   0.01788182
  0.16260000   0.01557373
  0.16260000   0.01356357
  0.16260000   0.01181288
  0.16260000   0.01028816
  0.16260000   0.00896025
  0.16260000   0.00780375
  0.16260000   0.00679651
  0.16260000   0.00591929
  0.16260000   0.00515529
  0.16260000   0.00448991
  0.16260000   0.00391041
  0.16260000   0.00340570
  0.16260000   0.00296614
  0.16260000   0.00258332
  0.16260000   0.00224990
  0.16260000   0.00195952
  0.16260000   0.00170662
  0.16260000   0.00148637
  0.16280000   0.03159209
  0.16280000   0.02753278
  0.16280000   0.02399510
  0.16280000   0.02091200
  0.16280000   0.01822507
  0.16280000   0.01588339
  0.16280000   0.01384260
  0.16280000   0.01206403
  0.16280000   0.01051399
  0.16280000   0.00916312
  0.16280000   0.00798581
  0.16280000   0.00695978
  0.16280000   0.00606557
  0.16280000   0.00528626
  0.16280000   0.00460708
  0.16280000   0.00401516
  0.16280000   0.00349930
  0.16280000   0.00304972
  0.16280000   0.00265790
  0.16280000   0.00231642
  0.16280000   0.00201882
  0.16280000   0.00175945
  0.16280000   0.00153341
  0.16300000   0.03211171
  0.16300000   0.02800453
  0.16300000   0.02442271
  0.16300000   0.02129904
  0.16300000   0.01857491
  0.16300000   0.01619921
  0.16300000   0.01412737
  0.16300000   0.01232053
  0.16300000   0.01074478
  0.16300000   0.00937058
  0.16300000   0.00817213
  0.16300000   0.00712696
  0.16300000   0.00621547
  0.16300000   0.00542056
  0.16300000   0.00472731
  0.16300000   0.00412273
  0.16300000   0.00359547
  0.16300000   0.00313565
  0.16300000   0.00273463
  0.16300000   0.00238490
  0.16300000   0.00207991
  0.16300000   0.00181391
  0.16300000   0.00158194
  0.16320000   0.03263988
  0.16320000   0.02848435
  0.16320000   0.02485793
  0.16320000   0.02169323
  0.16320000   0.01893146
  0.16320000   0.01652131
  0.16320000   0.01441800
  0.16320000   0.01258248
  0.16320000   0.01098064
  0.16320000   0.00958273
  0.16320000   0.00836279
  0.16320000   0.00729817
  0.16320000   0.00636908
  0.16320000   0.00555827
  0.16320000   0.00485068
  0.16320000   0.00423318
  0.16320000   0.00369429
  0.16320000   0.00322400
  0.16320000   0.00281358
  0.16320000   0.00245541
  0.16320000   0.00214284
  0.16320000   0.00187007
  0.16320000   0.00163201
  0.16340000   0.03317673
  0.16340000   0.02897240
  0.16340000   0.02530091
  0.16340000   0.02209472
  0.16340000   0.01929486
  0.16340000   0.01684981
  0.16340000   0.01471461
  0.16340000   0.01285000
  0.16340000   0.01122167
  0.16340000   0.00979969
  0.16340000   0.00855791
  0.16340000   0.00747348
  0.16340000   0.00652648
  0.16340000   0.00569948
  0.16340000   0.00497727
  0.16340000   0.00434659
  0.16340000   0.00379582
  0.16340000   0.00331484
  0.16340000   0.00289481
  0.16340000   0.00252801
  0.16340000   0.00220769
  0.16340000   0.00192795
  0.16340000   0.00168367
  0.16360000   0.03372240
  0.16360000   0.02946881
  0.16360000   0.02575179
  0.16360000   0.02250365
  0.16360000   0.01966523
  0.16360000   0.01718484
  0.16360000   0.01501732
  0.16360000   0.01312320
  0.16360000   0.01146800
  0.16360000   0.01002157
  0.16360000   0.00875758
  0.16360000   0.00765301
  0.16360000   0.00668777
  0.16360000   0.00584428
  0.16360000   0.00510717
  0.16360000   0.00446303
  0.16360000   0.00390014
  0.16360000   0.00340825
  0.16360000   0.00297839
  0.16360000   0.00260275
  0.16360000   0.00227449
  0.16360000   0.00198764
  0.16360000   0.00173696
  0.16380000   0.03427705
  0.16380000   0.02997372
  0.16380000   0.02621070
  0.16380000   0.02292014
  0.16380000   0.02004271
  0.16380000   0.01752654
  0.16380000   0.01532626
  0.16380000   0.01340222
  0.16380000   0.01171973
  0.16380000   0.01024846
  0.16380000   0.00896190
  0.16380000   0.00783686
  0.16380000   0.00685305
  0.16380000   0.00599275
  0.16380000   0.00524046
  0.16380000   0.00458260
  0.16380000   0.00400733
  0.16380000   0.00350428
  0.16380000   0.00306438
  0.16380000   0.00267971
  0.16380000   0.00234332
  0.16380000   0.00204917
  0.16380000   0.00179194
  0.16400000   0.03484081
  0.16400000   0.03048727
  0.16400000   0.02667778
  0.16400000   0.02334433
  0.16400000   0.02042743
  0.16400000   0.01787503
  0.16400000   0.01564156
  0.16400000   0.01368717
  0.16400000   0.01197699
  0.16400000   0.01048050
  0.16400000   0.00917100
  0.16400000   0.00802512
  0.16400000   0.00702242
  0.16400000   0.00614501
  0.16400000   0.00537722
  0.16400000   0.00470537
  0.16400000   0.00411747
  0.16400000   0.00360303
  0.16400000   0.00315286
  0.16400000   0.00275894
  0.16400000   0.00241424
  0.16400000   0.00211260
  0.16400000   0.00184866
  0.16420000   0.03541385
  0.16420000   0.03100963
  0.16420000   0.02715319
  0.16420000   0.02377638
  0.16420000   0.02081955
  0.16420000   0.01823044
  0.16420000   0.01596334
  0.16420000   0.01397818
  0.16420000   0.01223990
  0.16420000   0.01071779
  0.16420000   0.00938497
  0.16420000   0.00821791
  0.16420000   0.00719597
  0.16420000   0.00630113
  0.16420000   0.00551756
  0.16420000   0.00483144
  0.16420000   0.00423064
  0.16420000   0.00370455
  0.16420000   0.00324389
  0.16420000   0.00284051
  0.16420000   0.00248730
  0.16420000   0.00217801
  0.16420000   0.00190718
  0.16440000   0.03599630
  0.16440000   0.03154093
  0.16440000   0.02763706
  0.16440000   0.02421642
  0.16440000   0.02121918
  0.16440000   0.01859293
  0.16440000   0.01629174
  0.16440000   0.01427537
  0.16440000   0.01250858
  0.16440000   0.01096045
  0.16440000   0.00960394
  0.16440000   0.00841532
  0.16440000   0.00737382
  0.16440000   0.00646122
  0.16440000   0.00566156
  0.16440000   0.00496088
  0.16440000   0.00434692
  0.16440000   0.00380894
  0.16440000   0.00333755
  0.16440000   0.00292450
  0.16440000   0.00256257
  0.16440000   0.00224543
  0.16440000   0.00196755
  0.16460000   0.03658833
  0.16460000   0.03208132
  0.16460000   0.02812955
  0.16460000   0.02466460
  0.16460000   0.02162649
  0.16460000   0.01896262
  0.16460000   0.01662690
  0.16460000   0.01457889
  0.16460000   0.01278315
  0.16460000   0.01120861
  0.16460000   0.00982802
  0.16460000   0.00861748
  0.16460000   0.00755606
  0.16460000   0.00662537
  0.16460000   0.00580932
  0.16460000   0.00509379
  0.16460000   0.00446639
  0.16460000   0.00391627
  0.16460000   0.00343392
  0.16460000   0.00301097
  0.16460000   0.00264012
  0.16460000   0.00231495
  0.16460000   0.00202983
  0.16480000   0.03719009
  0.16480000   0.03263098
  0.16480000   0.02863082
  0.16480000   0.02512108
  0.16480000   0.02204161
  0.16480000   0.01933966
  0.16480000   0.01696895
  0.16480000   0.01488885
  0.16480000   0.01306376
  0.16480000   0.01146239
  0.16480000   0.01005733
  0.16480000   0.00882450
  0.16480000   0.00774280
  0.16480000   0.00679370
  0.16480000   0.00596094
  0.16480000   0.00523026
  0.16480000   0.00458915
  0.16480000   0.00402663
  0.16480000   0.00353306
  0.16480000   0.00310000
  0.16480000   0.00272002
  0.16480000   0.00238662
  0.16480000   0.00209408
  0.16500000   0.03780174
  0.16500000   0.03319004
  0.16500000   0.02914102
  0.16500000   0.02558600
  0.16500000   0.02246470
  0.16500000   0.01972420
  0.16500000   0.01731803
  0.16500000   0.01520541
  0.16500000   0.01335052
  0.16500000   0.01172191
  0.16500000   0.01029198
  0.16500000   0.00903649
  0.16500000   0.00793416
  0.16500000   0.00696631
  0.16500000   0.00611652
  0.16500000   0.00537039
  0.16500000   0.00471529
  0.16500000   0.00414010
  0.16500000   0.00363508
  0.16500000   0.00319166
  0.16500000   0.00280234
  0.16500000   0.00246050
  0.16500000   0.00216037
  0.16520000   0.03842345
  0.16520000   0.03375868
  0.16520000   0.02966030
  0.16520000   0.02605952
  0.16520000   0.02289591
  0.16520000   0.02011638
  0.16520000   0.01767430
  0.16520000   0.01552870
  0.16520000   0.01364358
  0.16520000   0.01198731
  0.16520000   0.01053212
  0.16520000   0.00925358
  0.16520000   0.00813025
  0.16520000   0.00714330
  0.16520000   0.00627615
  0.16520000   0.00551428
  0.16520000   0.00484489
  0.16520000   0.00425677
  0.16520000   0.00374004
  0.16520000   0.00328604
  0.16520000   0.00288715
  0.16520000   0.00253668
  0.16520000   0.00222876
  0.16540000   0.03905537
  0.16540000   0.03433706
  0.16540000   0.03018884
  0.16540000   0.02654180
  0.16540000   0.02333539
  0.16540000   0.02051636
  0.16540000   0.01803790
  0.16540000   0.01585886
  0.16540000   0.01394307
  0.16540000   0.01225872
  0.16540000   0.01077785
  0.16540000   0.00947588
  0.16540000   0.00833119
  0.16540000   0.00732479
  0.16540000   0.00643996
  0.16540000   0.00566202
  0.16540000   0.00497806
  0.16540000   0.00437672
  0.16540000   0.00384803
  0.16540000   0.00338320
  0.16540000   0.00297452
  0.16540000   0.00261522
  0.16540000   0.00229931
  0.16560000   0.03969768
  0.16560000   0.03492534
  0.16560000   0.03072679
  0.16560000   0.02703301
  0.16560000   0.02378331
  0.16560000   0.02092429
  0.16560000   0.01840897
  0.16560000   0.01619604
  0.16560000   0.01424914
  0.16560000   0.01253627
  0.16560000   0.01102932
  0.16560000   0.00970352
  0.16560000   0.00853710
  0.16560000   0.00751089
  0.16560000   0.00660804
  0.16560000   0.00581372
  0.16560000   0.00511489
  0.16560000   0.00450006
  0.16560000   0.00395914
  0.16560000   0.00348324
  0.16560000   0.00306455
  0.16560000   0.00269618
  0.16560000   0.00237210
  0.16580000   0.04035054
  0.16580000   0.03552369
  0.16580000   0.03127431
  0.16580000   0.02753330
  0.16580000   0.02423982
  0.16580000   0.02134032
  0.16580000   0.01878768
  0.16580000   0.01654039
  0.16580000   0.01456192
  0.16580000   0.01282011
  0.16580000   0.01128666
  0.16580000   0.00993663
  0.16580000   0.00874809
  0.16580000   0.00770172
  0.16580000   0.00678051
  0.16580000   0.00596949
  0.16580000   0.00525548
  0.16580000   0.00462687
  0.16580000   0.00407346
  0.16580000   0.00358624
  0.16580000   0.00315729
  0.16580000   0.00277966
  0.16580000   0.00244719
  0.16600000   0.04101413
  0.16600000   0.03613229
  0.16600000   0.03183159
  0.16600000   0.02804284
  0.16600000   0.02470509
  0.16600000   0.02176463
  0.16600000   0.01917417
  0.16600000   0.01689205
  0.16600000   0.01488157
  0.16600000   0.01311038
  0.16600000   0.01155000
  0.16600000   0.01017534
  0.16600000   0.00896430
  0.16600000   0.00789740
  0.16600000   0.00695748
  0.16600000   0.00612943
  0.16600000   0.00539993
  0.16600000   0.00475726
  0.16600000   0.00419108
  0.16600000   0.00369228
  0.16600000   0.00325285
  0.16600000   0.00286572
  0.16600000   0.00252467
  0.16620000   0.04168863
  0.16620000   0.03675131
  0.16620000   0.03239880
  0.16620000   0.02856181
  0.16620000   0.02517928
  0.16620000   0.02219737
  0.16620000   0.01956862
  0.16620000   0.01725120
  0.16620000   0.01520823
  0.16620000   0.01340721
  0.16620000   0.01181948
  0.16620000   0.01041979
  0.16620000   0.00918585
  0.16620000   0.00809805
  0.16620000   0.00713907
  0.16620000   0.00629365
  0.16620000   0.00554836
  0.16620000   0.00489132
  0.16620000   0.00431209
  0.16620000   0.00380146
  0.16620000   0.00335130
  0.16620000   0.00295445
  0.16620000   0.00260459
  0.16640000   0.04237421
  0.16640000   0.03738092
  0.16640000   0.03297610
  0.16640000   0.02909038
  0.16640000   0.02566258
  0.16640000   0.02263871
  0.16640000   0.01997117
  0.16640000   0.01761797
  0.16640000   0.01554206
  0.16640000   0.01371077
  0.16640000   0.01209526
  0.16640000   0.01067011
  0.16640000   0.00941288
  0.16640000   0.00830380
  0.16640000   0.00732540
  0.16640000   0.00646228
  0.16640000   0.00570086
  0.16640000   0.00502916
  0.16640000   0.00443661
  0.16640000   0.00391387
  0.16640000   0.00345273
  0.16640000   0.00304592
  0.16640000   0.00268705
  0.16660000   0.04307106
  0.16660000   0.03802131
  0.16660000   0.03356369
  0.16660000   0.02962873
  0.16660000   0.02615515
  0.16660000   0.02308882
  0.16660000   0.02038201
  0.16660000   0.01799255
  0.16660000   0.01588322
  0.16660000   0.01402119
  0.16660000   0.01237746
  0.16660000   0.01092644
  0.16660000   0.00964552
  0.16660000   0.00851477
  0.16660000   0.00751659
  0.16660000   0.00663542
  0.16660000   0.00585756
  0.16660000   0.00517089
  0.16660000   0.00456472
  0.16660000   0.00402961
  0.16660000   0.00355723
  0.16660000   0.00314023
  0.16660000   0.00277211
  0.16680000   0.04377935
  0.16680000   0.03867266
  0.16680000   0.03416173
  0.16680000   0.03017703
  0.16680000   0.02665716
  0.16680000   0.02354788
  0.16680000   0.02080129
  0.16680000   0.01837508
  0.16680000   0.01623187
  0.16680000   0.01433865
  0.16680000   0.01266625
  0.16680000   0.01118892
  0.16680000   0.00988391
  0.16680000   0.00873111
  0.16680000   0.00771277
  0.16680000   0.00681321
  0.16680000   0.00601857
  0.16680000   0.00531661
  0.16680000   0.00469653
  0.16680000   0.00414876
  0.16680000   0.00366489
  0.16680000   0.00323746
  0.16680000   0.00285987
  0.16700000   0.04449928
  0.16700000   0.03933517
  0.16700000   0.03477043
  0.16700000   0.03073548
  0.16700000   0.02716881
  0.16700000   0.02401606
  0.16700000   0.02122920
  0.16700000   0.01876574
  0.16700000   0.01658817
  0.16700000   0.01466329
  0.16700000   0.01296178
  0.16700000   0.01145772
  0.16700000   0.01012819
  0.16700000   0.00895295
  0.16700000   0.00791408
  0.16700000   0.00699576
  0.16700000   0.00618400
  0.16700000   0.00546644
  0.16700000   0.00483214
  0.16700000   0.00427145
  0.16700000   0.00377581
  0.16700000   0.00333769
  0.16700000   0.00295041
  0.16720000   0.04523103
  0.16720000   0.04000901
  0.16720000   0.03538996
  0.16720000   0.03130425
  0.16720000   0.02769027
  0.16720000   0.02449355
  0.16720000   0.02166590
  0.16720000   0.01916471
  0.16720000   0.01695228
  0.16720000   0.01499528
  0.16720000   0.01326420
  0.16720000   0.01173297
  0.16720000   0.01037851
  0.16720000   0.00918042
  0.16720000   0.00812063
  0.16720000   0.00718320
  0.16720000   0.00635398
  0.16720000   0.00562049
  0.16720000   0.00497167
  0.16720000   0.00439776
  0.16720000   0.00389010
  0.16720000   0.00344104
  0.16720000   0.00304382
  0.16740000   0.04597481
  0.16740000   0.04069438
  0.16740000   0.03602052
  0.16740000   0.03188354
  0.16740000   0.02822173
  0.16740000   0.02498052
  0.16740000   0.02211159
  0.16740000   0.01957216
  0.16740000   0.01732439
  0.16740000   0.01533478
  0.16740000   0.01357368
  0.16740000   0.01201483
  0.16740000   0.01063501
  0.16740000   0.00941367
  0.16740000   0.00833258
  0.16740000   0.00737566
  0.16740000   0.00652863
  0.16740000   0.00577888
  0.16740000   0.00511523
  0.16740000   0.00452780
  0.16740000   0.00400784
  0.16740000   0.00354758
  0.16740000   0.00314018
  0.16760000   0.04673080
  0.16760000   0.04139148
  0.16760000   0.03666231
  0.16760000   0.03247354
  0.16760000   0.02876339
  0.16760000   0.02547717
  0.16760000   0.02256643
  0.16760000   0.01998826
  0.16760000   0.01770466
  0.16760000   0.01568197
  0.16760000   0.01389037
  0.16760000   0.01230346
  0.16760000   0.01089786
  0.16760000   0.00965284
  0.16760000   0.00855007
  0.16760000   0.00757328
  0.16760000   0.00670809
  0.16760000   0.00594174
  0.16760000   0.00526294
  0.16760000   0.00466170
  0.16760000   0.00412914
  0.16760000   0.00365742
  0.16760000   0.00323960
  0.16780000   0.04749921
  0.16780000   0.04210051
  0.16780000   0.03731552
  0.16780000   0.03307444
  0.16780000   0.02931544
  0.16780000   0.02598369
  0.16780000   0.02303063
  0.16780000   0.02041321
  0.16780000   0.01809328
  0.16780000   0.01603702
  0.16780000   0.01421445
  0.16780000   0.01259903
  0.16780000   0.01116720
  0.16780000   0.00989809
  0.16780000   0.00877322
  0.16780000   0.00777619
  0.16780000   0.00689247
  0.16780000   0.00610918
  0.16780000   0.00541492
  0.16780000   0.00479955
  0.16780000   0.00425412
  0.16780000   0.00377067
  0.16780000   0.00334216
  0.16800000   0.04828024
  0.16800000   0.04282168
  0.16800000   0.03798036
  0.16800000   0.03368646
  0.16800000   0.02987807
  0.16800000   0.02650027
  0.16800000   0.02350437
  0.16800000   0.02084719
  0.16800000   0.01849042
  0.16800000   0.01640010
  0.16800000   0.01454609
  0.16800000   0.01290169
  0.16800000   0.01144319
  0.16800000   0.01014957
  0.16800000   0.00900220
  0.16800000   0.00798454
  0.16800000   0.00708193
  0.16800000   0.00628135
  0.16800000   0.00557128
  0.16800000   0.00494148
  0.16800000   0.00438287
  0.16800000   0.00388742
  0.16800000   0.00344798
  0.16820000   0.04907410
  0.16820000   0.04355518
  0.16820000   0.03865703
  0.16820000   0.03430980
  0.16820000   0.03045149
  0.16820000   0.02702712
  0.16820000   0.02398786
  0.16820000   0.02129039
  0.16820000   0.01889628
  0.16820000   0.01677140
  0.16820000   0.01488547
  0.16820000   0.01321162
  0.16820000   0.01172600
  0.16820000   0.01040745
  0.16820000   0.00923716
  0.16820000   0.00819847
  0.16820000   0.00727659
  0.16820000   0.00645837
  0.16820000   0.00573216
  0.16820000   0.00508760
  0.16820000   0.00451553
  0.16820000   0.00400779
  0.16820000   0.00355714
  0.16840000   0.04988099
  0.16840000   0.04430123
  0.16840000   0.03934575
  0.16840000   0.03494465
  0.16840000   0.03103591
  0.16840000   0.02756443
  0.16840000   0.02448128
  0.16840000   0.02174301
  0.16840000   0.01931104
  0.16840000   0.01715110
  0.16840000   0.01523276
  0.16840000   0.01352900
  0.16840000   0.01201581
  0.16840000   0.01067187
  0.16840000   0.00947825
  0.16840000   0.00841814
  0.16840000   0.00747660
  0.16840000   0.00664037
  0.16840000   0.00589768
  0.16840000   0.00523805
  0.16840000   0.00465220
  0.16840000   0.00413188
  0.16840000   0.00366976
  0.16860000   0.05070112
  0.16860000   0.04506005
  0.16860000   0.04004672
  0.16860000   0.03559125
  0.16860000   0.03163154
  0.16860000   0.02811241
  0.16860000   0.02498484
  0.16860000   0.02220524
  0.16860000   0.01973490
  0.16860000   0.01753939
  0.16860000   0.01558815
  0.16860000   0.01385400
  0.16860000   0.01231277
  0.16860000   0.01094300
  0.16860000   0.00972563
  0.16860000   0.00864369
  0.16860000   0.00768211
  0.16860000   0.00682751
  0.16860000   0.00606798
  0.16860000   0.00539295
  0.16860000   0.00479301
  0.16860000   0.00425982
  0.16860000   0.00378594
  0.16880000   0.05153473
  0.16880000   0.04583185
  0.16880000   0.04076016
  0.16880000   0.03624979
  0.16880000   0.03223859
  0.16880000   0.02867129
  0.16880000   0.02549875
  0.16880000   0.02267730
  0.16880000   0.02016805
  0.16880000   0.01793648
  0.16880000   0.01595183
  0.16880000   0.01418680
  0.16880000   0.01261707
  0.16880000   0.01122103
  0.16880000   0.00997946
  0.16880000   0.00887528
  0.16880000   0.00789327
  0.16880000   0.00701992
  0.16880000   0.00624320
  0.16880000   0.00555243
  0.16880000   0.00493808
  0.16880000   0.00439172
  0.16880000   0.00390580
  0.16900000   0.05238202
  0.16900000   0.04661684
  0.16900000   0.04148631
  0.16900000   0.03692051
  0.16900000   0.03285727
  0.16900000   0.02924126
  0.16900000   0.02602323
  0.16900000   0.02315938
  0.16900000   0.02061071
  0.16900000   0.01834254
  0.16900000   0.01632399
  0.16900000   0.01452759
  0.16900000   0.01292889
  0.16900000   0.01150612
  0.16900000   0.01023992
  0.16900000   0.00911307
  0.16900000   0.00811023
  0.16900000   0.00721775
  0.16900000   0.00642348
  0.16900000   0.00571662
  0.16900000   0.00508755
  0.16900000   0.00452770
  0.16900000   0.00402946
  0.16920000   0.05324322
  0.16920000   0.04741527
  0.16920000   0.04222537
  0.16920000   0.03760362
  0.16920000   0.03348782
  0.16920000   0.02982255
  0.16920000   0.02655849
  0.16920000   0.02365170
  0.16920000   0.02106308
  0.16920000   0.01875780
  0.16920000   0.01670483
  0.16920000   0.01487657
  0.16920000   0.01324841
  0.16920000   0.01179844
  0.16920000   0.01050718
  0.16920000   0.00935724
  0.16920000   0.00833315
  0.16920000   0.00742115
  0.16920000   0.00660897
  0.16920000   0.00588567
  0.16920000   0.00524153
  0.16920000   0.00466789
  0.16920000   0.00415704
  0.16940000   0.05411855
  0.16940000   0.04822735
  0.16940000   0.04297758
  0.16940000   0.03829936
  0.16940000   0.03413045
  0.16940000   0.03041539
  0.16940000   0.02710474
  0.16940000   0.02415449
  0.16940000   0.02152538
  0.16940000   0.01918245
  0.16940000   0.01709456
  0.16940000   0.01523393
  0.16940000   0.01357582
  0.16940000   0.01209820
  0.16940000   0.01078141
  0.16940000   0.00960794
  0.16940000   0.00856221
  0.16940000   0.00763029
  0.16940000   0.00679981
  0.16940000   0.00605972
  0.16940000   0.00540018
  0.16940000   0.00481243
  0.16940000   0.00428865
  0.16960000   0.05500825
  0.16960000   0.04905332
  0.16960000   0.04374317
  0.16960000   0.03900796
  0.16960000   0.03478541
  0.16960000   0.03102000
  0.16960000   0.02766223
  0.16960000   0.02466795
  0.16960000   0.02199781
  0.16960000   0.01961671
  0.16960000   0.01749336
  0.16960000   0.01559986
  0.16960000   0.01391133
  0.16960000   0.01240556
  0.16960000   0.01106279
  0.16960000   0.00986537
  0.16960000   0.00879755
  0.16960000   0.00784532
  0.16960000   0.00699616
  0.16960000   0.00623891
  0.16960000   0.00556363
  0.16960000   0.00496144
  0.16960000   0.00442443
  0.16980000   0.05591255
  0.16980000   0.04989341
  0.16980000   0.04452238
  0.16980000   0.03972965
  0.16980000   0.03545292
  0.16980000   0.03163662
  0.16980000   0.02823116
  0.16980000   0.02519232
  0.16980000   0.02248060
  0.16980000   0.02006079
  0.16980000   0.01790147
  0.16980000   0.01597459
  0.16980000   0.01425512
  0.16980000   0.01272074
  0.16980000   0.01135152
  0.16980000   0.01012968
  0.16980000   0.00903936
  0.16980000   0.00806641
  0.16980000   0.00719818
  0.16980000   0.00642340
  0.16980000   0.00573202
  0.16980000   0.00511506
  0.16980000   0.00456451
  0.17000000   0.05683170
  0.17000000   0.05074786
  0.17000000   0.04531545
  0.17000000   0.04046467
  0.17000000   0.03613322
  0.17000000   0.03226548
  0.17000000   0.02881179
  0.17000000   0.02572782
  0.17000000   0.02297398
  0.17000000   0.02051492
  0.17000000   0.01831909
  0.17000000   0.01635831
  0.17000000   0.01460740
  0.17000000   0.01304391
  0.17000000   0.01164778
  0.17000000   0.01040108
  0.17000000   0.00928782
  0.17000000   0.00829373
  0.17000000   0.00740603
  0.17000000   0.00661335
  0.17000000   0.00590552
  0.17000000   0.00527344
  0.17000000   0.00470902
  0.17020000   0.05776592
  0.17020000   0.05161693
  0.17020000   0.04612263
  0.17020000   0.04121327
  0.17020000   0.03682656
  0.17020000   0.03290683
  0.17020000   0.02940435
  0.17020000   0.02627470
  0.17020000   0.02347818
  0.17020000   0.02097933
  0.17020000   0.01874645
  0.17020000   0.01675124
  0.17020000   0.01496839
  0.17020000   0.01337530
  0.17020000   0.01195176
  0.17020000   0.01067974
  0.17020000   0.00954311
  0.17020000   0.00852745
  0.17020000   0.00761989
  0.17020000   0.00680892
  0.17020000   0.00608426
  0.17020000   0.00543673
  0.17020000   0.00485811
  0.17040000   0.05871547
  0.17040000   0.05250085
  0.17040000   0.04694416
  0.17040000   0.04197571
  0.17040000   0.03753319
  0.17040000   0.03356091
  0.17040000   0.03000909
  0.17040000   0.02683319
  0.17040000   0.02399344
  0.17040000   0.02145424
  0.17040000   0.01918377
  0.17040000   0.01715360
  0.17040000   0.01533829
  0.17040000   0.01371509
  0.17040000   0.01226368
  0.17040000   0.01096587
  0.17040000   0.00980541
  0.17040000   0.00876775
  0.17040000   0.00783991
  0.17040000   0.00701026
  0.17040000   0.00626841
  0.17040000   0.00560507
  0.17040000   0.00501192
  0.17060000   0.05968060
  0.17060000   0.05339988
  0.17060000   0.04778030
  0.17060000   0.04275222
  0.17060000   0.03825336
  0.17060000   0.03422798
  0.17060000   0.03062624
  0.17060000   0.02740355
  0.17060000   0.02451999
  0.17060000   0.02193989
  0.17060000   0.01963129
  0.17060000   0.01756562
  0.17060000   0.01571733
  0.17060000   0.01406352
  0.17060000   0.01258374
  0.17060000   0.01125966
  0.17060000   0.01007492
  0.17060000   0.00901483
  0.17060000   0.00806629
  0.17060000   0.00721756
  0.17060000   0.00645814
  0.17060000   0.00577862
  0.17060000   0.00517060
  0.17080000   0.06066156
  0.17080000   0.05431428
  0.17080000   0.04863131
  0.17080000   0.04354308
  0.17080000   0.03898733
  0.17080000   0.03490829
  0.17080000   0.03125608
  0.17080000   0.02798601
  0.17080000   0.02505809
  0.17080000   0.02243652
  0.17080000   0.02008924
  0.17080000   0.01798754
  0.17080000   0.01610573
  0.17080000   0.01442079
  0.17080000   0.01291214
  0.17080000   0.01156132
  0.17080000   0.01035183
  0.17080000   0.00926887
  0.17080000   0.00829921
  0.17080000   0.00743099
  0.17080000   0.00665360
  0.17080000   0.00595754
  0.17080000   0.00533430
  0.17100000   0.06165862
  0.17100000   0.05524431
  0.17100000   0.04949745
  0.17100000   0.04434855
  0.17100000   0.03973536
  0.17100000   0.03560211
  0.17100000   0.03189885
  0.17100000   0.02858084
  0.17100000   0.02560799
  0.17100000   0.02294439
  0.17100000   0.02055786
  0.17100000   0.01841958
  0.17100000   0.01650372
  0.17100000   0.01478714
  0.17100000   0.01324911
  0.17100000   0.01187106
  0.17100000   0.01063635
  0.17100000   0.00953006
  0.17100000   0.00853884
  0.17100000   0.00765073
  0.17100000   0.00685498
  0.17100000   0.00614201
  0.17100000   0.00550319
  0.17120000   0.06267202
  0.17120000   0.05619023
  0.17120000   0.05037899
  0.17120000   0.04516889
  0.17120000   0.04049772
  0.17120000   0.03630969
  0.17120000   0.03255482
  0.17120000   0.02918830
  0.17120000   0.02616995
  0.17120000   0.02346374
  0.17120000   0.02103741
  0.17120000   0.01886199
  0.17120000   0.01691154
  0.17120000   0.01516278
  0.17120000   0.01359487
  0.17120000   0.01218909
  0.17120000   0.01092868
  0.17120000   0.00979861
  0.17120000   0.00878540
  0.17120000   0.00787696
  0.17120000   0.00706246
  0.17120000   0.00633218
  0.17120000   0.00567742
  0.17140000   0.06370204
  0.17140000   0.05715231
  0.17140000   0.05127620
  0.17140000   0.04600438
  0.17140000   0.04127468
  0.17140000   0.03703132
  0.17140000   0.03322427
  0.17140000   0.02980866
  0.17140000   0.02674422
  0.17140000   0.02399484
  0.17140000   0.02152813
  0.17140000   0.01931502
  0.17140000   0.01732943
  0.17140000   0.01554797
  0.17140000   0.01394965
  0.17140000   0.01251564
  0.17140000   0.01122905
  0.17140000   0.01007473
  0.17140000   0.00903907
  0.17140000   0.00810988
  0.17140000   0.00727621
  0.17140000   0.00652824
  0.17140000   0.00585716
  0.17160000   0.06474895
  0.17160000   0.05813083
  0.17160000   0.05218936
  0.17160000   0.04685530
  0.17160000   0.04206653
  0.17160000   0.03776727
  0.17160000   0.03390747
  0.17160000   0.03044218
  0.17160000   0.02733108
  0.17160000   0.02453795
  0.17160000   0.02203029
  0.17160000   0.01977892
  0.17160000   0.01775763
  0.17160000   0.01594293
  0.17160000   0.01431368
  0.17160000   0.01285093
  0.17160000   0.01153767
  0.17160000   0.01035862
  0.17160000   0.00930007
  0.17160000   0.00834969
  0.17160000   0.00749643
  0.17160000   0.00673037
  0.17160000   0.00604260
  0.17180000   0.06581303
  0.17180000   0.05912607
  0.17180000   0.05311875
  0.17180000   0.04772193
  0.17180000   0.04287355
  0.17180000   0.03851783
  0.17180000   0.03460469
  0.17180000   0.03108915
  0.17180000   0.02793080
  0.17180000   0.02509334
  0.17180000   0.02254415
  0.17180000   0.02025395
  0.17180000   0.01819642
  0.17180000   0.01634791
  0.17180000   0.01468720
  0.17180000   0.01319520
  0.17180000   0.01185477
  0.17180000   0.01065051
  0.17180000   0.00956859
  0.17180000   0.00859658
  0.17180000   0.00772331
  0.17180000   0.00693876
  0.17180000   0.00623390
  0.17200000   0.06689455
  0.17200000   0.06013831
  0.17200000   0.05406465
  0.17200000   0.04860456
  0.17200000   0.04369601
  0.17200000   0.03928327
  0.17200000   0.03531623
  0.17200000   0.03174985
  0.17200000   0.02854367
  0.17200000   0.02566128
  0.17200000   0.02306998
  0.17200000   0.02074038
  0.17200000   0.01864603
  0.17200000   0.01676318
  0.17200000   0.01507047
  0.17200000   0.01354869
  0.17200000   0.01218058
  0.17200000   0.01095062
  0.17200000   0.00984487
  0.17200000   0.00885077
  0.17200000   0.00795706
  0.17200000   0.00715359
  0.17200000   0.00643126
  0.17220000   0.06799380
  0.17220000   0.06116784
  0.17220000   0.05502736
  0.17220000   0.04950348
  0.17220000   0.04453423
  0.17220000   0.04006391
  0.17220000   0.03604238
  0.17220000   0.03242458
  0.17220000   0.02916996
  0.17220000   0.02624206
  0.17220000   0.02360807
  0.17220000   0.02123848
  0.17220000   0.01910675
  0.17220000   0.01718899
  0.17220000   0.01546373
  0.17220000   0.01391164
  0.17220000   0.01251534
  0.17220000   0.01125919
  0.17220000   0.01012912
  0.17220000   0.00911248
  0.17220000   0.00819788
  0.17220000   0.00737508
  0.17220000   0.00663486
  0.17240000   0.06911106
  0.17240000   0.06221495
  0.17240000   0.05600718
  0.17240000   0.05041899
  0.17240000   0.04538850
  0.17240000   0.04086003
  0.17240000   0.03678344
  0.17240000   0.03311362
  0.17240000   0.02980999
  0.17240000   0.02683598
  0.17240000   0.02415870
  0.17240000   0.02174853
  0.17240000   0.01957883
  0.17240000   0.01762560
  0.17240000   0.01586724
  0.17240000   0.01428430
  0.17240000   0.01285929
  0.17240000   0.01157644
  0.17240000   0.01042157
  0.17240000   0.00938192
  0.17240000   0.00844598
  0.17240000   0.00760342
  0.17240000   0.00684491
  0.17260000   0.07024664
  0.17260000   0.06327994
  0.17260000   0.05700440
  0.17260000   0.05135140
  0.17260000   0.04625913
  0.17260000   0.04167194
  0.17260000   0.03753971
  0.17260000   0.03381729
  0.17260000   0.03046403
  0.17260000   0.02744331
  0.17260000   0.02472215
  0.17260000   0.02227082
  0.17260000   0.02006257
  0.17260000   0.01807330
  0.17260000   0.01628127
  0.17260000   0.01466694
  0.17260000   0.01321269
  0.17260000   0.01190263
  0.17260000   0.01072247
  0.17260000   0.00965932
  0.17260000   0.00870160
  0.17260000   0.00783883
  0.17260000   0.00706161
  0.17280000   0.07140082
  0.17280000   0.06436311
  0.17280000   0.05801934
  0.17280000   0.05230101
  0.17280000   0.04714642
  0.17280000   0.04249995
  0.17280000   0.03831150
  0.17280000   0.03453589
  0.17280000   0.03113241
  0.17280000   0.02806438
  0.17280000   0.02529873
  0.17280000   0.02280564
  0.17280000   0.02055826
  0.17280000   0.01853235
  0.17280000   0.01670610
  0.17280000   0.01505983
  0.17280000   0.01357579
  0.17280000   0.01223800
  0.17280000   0.01103204
  0.17280000   0.00994492
  0.17280000   0.00896494
  0.17280000   0.00808152
  0.17280000   0.00728516
  0.17300000   0.07257391
  0.17300000   0.06546478
  0.17300000   0.05905231
  0.17300000   0.05326815
  0.17300000   0.04805070
  0.17300000   0.04334439
  0.17300000   0.03909913
  0.17300000   0.03526973
  0.17300000   0.03181543
  0.17300000   0.02869948
  0.17300000   0.02588873
  0.17300000   0.02335329
  0.17300000   0.02106617
  0.17300000   0.01900306
  0.17300000   0.01714201
  0.17300000   0.01546323
  0.17300000   0.01394887
  0.17300000   0.01258281
  0.17300000   0.01135055
  0.17300000   0.01023897
  0.17300000   0.00923625
  0.17300000   0.00833173
  0.17300000   0.00751579
  0.17320000   0.07376622
  0.17320000   0.06658526
  0.17320000   0.06010362
  0.17320000   0.05425313
  0.17320000   0.04897228
  0.17320000   0.04420558
  0.17320000   0.03990293
  0.17320000   0.03601914
  0.17320000   0.03251341
  0.17320000   0.02934894
  0.17320000   0.02649249
  0.17320000   0.02391407
  0.17320000   0.02158662
  0.17320000   0.01948571
  0.17320000   0.01758928
  0.17320000   0.01587743
  0.17320000   0.01433218
  0.17320000   0.01293734
  0.17320000   0.01167825
  0.17320000   0.01054170
  0.17320000   0.00951576
  0.17320000   0.00858967
  0.17320000   0.00775372
  0.17340000   0.07497805
  0.17340000   0.06772485
  0.17340000   0.06117360
  0.17340000   0.05525628
  0.17340000   0.04991150
  0.17340000   0.04508384
  0.17340000   0.04072322
  0.17340000   0.03678444
  0.17340000   0.03322668
  0.17340000   0.03001307
  0.17340000   0.02711030
  0.17340000   0.02448830
  0.17340000   0.02211992
  0.17340000   0.01998060
  0.17340000   0.01804821
  0.17340000   0.01630271
  0.17340000   0.01472603
  0.17340000   0.01330184
  0.17340000   0.01201540
  0.17340000   0.01085337
  0.17340000   0.00980373
  0.17340000   0.00885560
  0.17340000   0.00799917
  0.17360000   0.07620974
  0.17360000   0.06888390
  0.17360000   0.06226257
  0.17360000   0.05627793
  0.17360000   0.05086870
  0.17360000   0.04597951
  0.17360000   0.04156034
  0.17360000   0.03756598
  0.17360000   0.03395557
  0.17360000   0.03069220
  0.17360000   0.02774250
  0.17360000   0.02507631
  0.17360000   0.02266637
  0.17360000   0.02048805
  0.17360000   0.01851910
  0.17360000   0.01673937
  0.17360000   0.01513069
  0.17360000   0.01367661
  0.17360000   0.01236228
  0.17360000   0.01117426
  0.17360000   0.01010041
  0.17360000   0.00912976
  0.17360000   0.00825239
  0.17380000   0.07746159
  0.17380000   0.07006272
  0.17380000   0.06337088
  0.17380000   0.05731842
  0.17380000   0.05184420
  0.17380000   0.04689294
  0.17380000   0.04241463
  0.17380000   0.03836409
  0.17380000   0.03470043
  0.17380000   0.03138668
  0.17380000   0.02838942
  0.17380000   0.02567841
  0.17380000   0.02322631
  0.17380000   0.02100838
  0.17380000   0.01900226
  0.17380000   0.01718772
  0.17380000   0.01554646
  0.17380000   0.01406193
  0.17380000   0.01271916
  0.17380000   0.01150462
  0.17380000   0.01040606
  0.17380000   0.00941240
  0.17380000   0.00851363
  0.17400000   0.07873393
  0.17400000   0.07126166
  0.17400000   0.06449886
  0.17400000   0.05837811
  0.17400000   0.05283838
  0.17400000   0.04782447
  0.17400000   0.04328645
  0.17400000   0.03917912
  0.17400000   0.03546159
  0.17400000   0.03209685
  0.17400000   0.02905140
  0.17400000   0.02629495
  0.17400000   0.02380006
  0.17400000   0.02154190
  0.17400000   0.01949801
  0.17400000   0.01764806
  0.17400000   0.01597364
  0.17400000   0.01445809
  0.17400000   0.01308634
  0.17400000   0.01184475
  0.17400000   0.01072095
  0.17400000   0.00970379
  0.17400000   0.00878313
  0.17420000   0.08002711
  0.17420000   0.07248105
  0.17420000   0.06564687
  0.17420000   0.05945733
  0.17420000   0.05385156
  0.17420000   0.04877447
  0.17420000   0.04417615
  0.17420000   0.04001144
  0.17420000   0.03623942
  0.17420000   0.03282306
  0.17420000   0.02972880
  0.17420000   0.02692627
  0.17420000   0.02438796
  0.17420000   0.02208896
  0.17420000   0.02000669
  0.17420000   0.01812072
  0.17420000   0.01641255
  0.17420000   0.01486541
  0.17420000   0.01346411
  0.17420000   0.01219492
  0.17420000   0.01104537
  0.17420000   0.01000418
  0.17420000   0.00906115
  0.17440000   0.08134145
  0.17440000   0.07372123
  0.17440000   0.06681524
  0.17440000   0.06055644
  0.17440000   0.05488413
  0.17440000   0.04974329
  0.17440000   0.04508410
  0.17440000   0.04086140
  0.17440000   0.03703428
  0.17440000   0.03356567
  0.17440000   0.03042197
  0.17440000   0.02757273
  0.17440000   0.02499037
  0.17440000   0.02264989
  0.17440000   0.02052862
  0.17440000   0.01860603
  0.17440000   0.01686351
  0.17440000   0.01528419
  0.17440000   0.01385278
  0.17440000   0.01255544
  0.17440000   0.01137959
  0.17440000   0.01031388
  0.17440000   0.00934797
  0.17460000   0.08267730
  0.17460000   0.07498257
  0.17460000   0.06800435
  0.17460000   0.06167582
  0.17460000   0.05593644
  0.17460000   0.05073131
  0.17460000   0.04601067
  0.17460000   0.04172938
  0.17460000   0.03784654
  0.17460000   0.03432505
  0.17460000   0.03113127
  0.17460000   0.02823469
  0.17460000   0.02560764
  0.17460000   0.02322504
  0.17460000   0.02106415
  0.17460000   0.01910432
  0.17460000   0.01732684
  0.17460000   0.01571475
  0.17460000   0.01425266
  0.17460000   0.01292660
  0.17460000   0.01172393
  0.17460000   0.01063315
  0.17460000   0.00964386
  0.17480000   0.08403501
  0.17480000   0.07626541
  0.17480000   0.06921455
  0.17480000   0.06281583
  0.17480000   0.05700888
  0.17480000   0.05173891
  0.17480000   0.04695623
  0.17480000   0.04261576
  0.17480000   0.03867659
  0.17480000   0.03510158
  0.17480000   0.03185708
  0.17480000   0.02891251
  0.17480000   0.02624013
  0.17480000   0.02381478
  0.17480000   0.02161363
  0.17480000   0.01961593
  0.17480000   0.01780289
  0.17480000   0.01615743
  0.17480000   0.01466407
  0.17480000   0.01330873
  0.17480000   0.01207867
  0.17480000   0.01096230
  0.17480000   0.00994911
  0.17500000   0.08541493
  0.17500000   0.07757013
  0.17500000   0.07044621
  0.17500000   0.06397684
  0.17500000   0.05810181
  0.17500000   0.05276647
  0.17500000   0.04792118
  0.17500000   0.04352093
  0.17500000   0.03952479
  0.17500000   0.03589565
  0.17500000   0.03259978
  0.17500000   0.02960657
  0.17500000   0.02688822
  0.17500000   0.02441948
  0.17500000   0.02217742
  0.17500000   0.02014123
  0.17500000   0.01829201
  0.17500000   0.01661257
  0.17500000   0.01508734
  0.17500000   0.01370215
  0.17500000   0.01244413
  0.17500000   0.01130163
  0.17500000   0.01026402
  0.17520000   0.08681742
  0.17520000   0.07889708
  0.17520000   0.07169972
  0.17520000   0.06515925
  0.17520000   0.05921564
  0.17520000   0.05381437
  0.17520000   0.04890592
  0.17520000   0.04444527
  0.17520000   0.04039156
  0.17520000   0.03670764
  0.17520000   0.03335977
  0.17520000   0.03031727
  0.17520000   0.02755229
  0.17520000   0.02503950
  0.17520000   0.02275590
  0.17520000   0.02068058
  0.17520000   0.01879454
  0.17520000   0.01708052
  0.17520000   0.01552282
  0.17520000   0.01410718
  0.17520000   0.01282065
  0.17520000   0.01165145
  0.17520000   0.01058888
  0.17540000   0.08824285
  0.17540000   0.08024665
  0.17540000   0.07297546
  0.17540000   0.06636344
  0.17540000   0.06035076
  0.17540000   0.05488304
  0.17540000   0.04991083
  0.17540000   0.04538920
  0.17540000   0.04127730
  0.17540000   0.03753796
  0.17540000   0.03413743
  0.17540000   0.03104500
  0.17540000   0.02823273
  0.17540000   0.02567525
  0.17540000   0.02334945
  0.17540000   0.02123436
  0.17540000   0.01931087
  0.17540000   0.01756163
  0.17540000   0.01597085
  0.17540000   0.01452417
  0.17540000   0.01320854
  0.17540000   0.01201209
  0.17540000   0.01092402
  0.17560000   0.08969158
  0.17560000   0.08161922
  0.17560000   0.07427382
  0.17560000   0.06758982
  0.17560000   0.06150758
  0.17560000   0.05597286
  0.17560000   0.05093634
  0.17560000   0.04635313
  0.17560000   0.04218241
  0.17560000   0.03838703
  0.17560000   0.03493320
  0.17560000   0.03179016
  0.17560000   0.02892995
  0.17560000   0.02632710
  0.17560000   0.02395846
  0.17560000   0.02180294
  0.17560000   0.01984136
  0.17560000   0.01805627
  0.17560000   0.01643180
  0.17560000   0.01495348
  0.17560000   0.01360816
  0.17560000   0.01238389
  0.17560000   0.01126976
  0.17580000   0.09116400
  0.17580000   0.08301517
  0.17580000   0.07559519
  0.17580000   0.06883878
  0.17580000   0.06268649
  0.17580000   0.05708426
  0.17580000   0.05198286
  0.17580000   0.04733748
  0.17580000   0.04310732
  0.17580000   0.03925525
  0.17580000   0.03574747
  0.17580000   0.03255318
  0.17580000   0.02964436
  0.17580000   0.02699548
  0.17580000   0.02458333
  0.17580000   0.02238672
  0.17580000   0.02038641
  0.17580000   0.01856483
  0.17580000   0.01690604
  0.17580000   0.01539546
  0.17580000   0.01401986
  0.17580000   0.01276718
  0.17580000   0.01162643
  0.17600000   0.09266049
  0.17600000   0.08443490
  0.17600000   0.07693999
  0.17600000   0.07011073
  0.17600000   0.06388793
  0.17600000   0.05821766
  0.17600000   0.05305082
  0.17600000   0.04834267
  0.17600000   0.04405246
  0.17600000   0.04014307
  0.17600000   0.03658068
  0.17600000   0.03333447
  0.17600000   0.03037637
  0.17600000   0.02768080
  0.17600000   0.02522446
  0.17600000   0.02298611
  0.17600000   0.02094640
  0.17600000   0.01908770
  0.17600000   0.01739394
  0.17600000   0.01585049
  0.17600000   0.01444400
  0.17600000   0.01316232
  0.17600000   0.01199438
  0.17620000   0.09418143
  0.17620000   0.08587881
  0.17620000   0.07830861
  0.17620000   0.07140611
  0.17620000   0.06511232
  0.17620000   0.05937350
  0.17620000   0.05414066
  0.17620000   0.04936915
  0.17620000   0.04501828
  0.17620000   0.04105092
  0.17620000   0.03743327
  0.17620000   0.03413447
  0.17620000   0.03112643
  0.17620000   0.02838349
  0.17620000   0.02588229
  0.17620000   0.02360153
  0.17620000   0.02152176
  0.17620000   0.01962527
  0.17620000   0.01789591
  0.17620000   0.01631895
  0.17620000   0.01488096
  0.17620000   0.01356968
  0.17620000   0.01237396
  0.17640000   0.09572723
  0.17640000   0.08734731
  0.17640000   0.07970149
  0.17640000   0.07272533
  0.17640000   0.06636009
  0.17640000   0.06055221
  0.17640000   0.05525282
  0.17640000   0.05041737
  0.17640000   0.04600521
  0.17640000   0.04197925
  0.17640000   0.03830568
  0.17640000   0.03495364
  0.17640000   0.03189496
  0.17640000   0.02910398
  0.17640000   0.02655725
  0.17640000   0.02423339
  0.17640000   0.02211289
  0.17640000   0.02017796
  0.17640000   0.01841235
  0.17640000   0.01680124
  0.17640000   0.01533112
  0.17640000   0.01398963
  0.17640000   0.01276554
  0.17660000   0.09729828
  0.17660000   0.08884081
  0.17660000   0.08111903
  0.17660000   0.07406883
  0.17660000   0.06763169
  0.17660000   0.06175424
  0.17660000   0.05638776
  0.17660000   0.05148778
  0.17660000   0.04701372
  0.17660000   0.04292852
  0.17660000   0.03919838
  0.17660000   0.03579242
  0.17660000   0.03268244
  0.17660000   0.02984272
  0.17660000   0.02724977
  0.17660000   0.02488214
  0.17660000   0.02272024
  0.17660000   0.02074619
  0.17660000   0.01894367
  0.17660000   0.01729777
  0.17660000   0.01579488
  0.17660000   0.01442257
  0.17660000   0.01316950
  0.17680000   0.09889499
  0.17680000   0.09035973
  0.17680000   0.08256169
  0.17680000   0.07543705
  0.17680000   0.06892757
  0.17680000   0.06298005
  0.17680000   0.05754593
  0.17680000   0.05258085
  0.17680000   0.04804427
  0.17680000   0.04389921
  0.17680000   0.04011183
  0.17680000   0.03665128
  0.17680000   0.03348932
  0.17680000   0.03060018
  0.17680000   0.02796032
  0.17680000   0.02554823
  0.17680000   0.02334424
  0.17680000   0.02133040
  0.17680000   0.01949030
  0.17680000   0.01780895
  0.17680000   0.01627265
  0.17680000   0.01486888
  0.17680000   0.01358622
  0.17700000   0.10051777
  0.17700000   0.09190450
  0.17700000   0.08402989
  0.17700000   0.07683044
  0.17700000   0.07024818
  0.17700000   0.06423011
  0.17700000   0.05872782
  0.17700000   0.05369705
  0.17700000   0.04909735
  0.17700000   0.04489178
  0.17700000   0.04104652
  0.17700000   0.03753070
  0.17700000   0.03431607
  0.17700000   0.03137682
  0.17700000   0.02868936
  0.17700000   0.02623211
  0.17700000   0.02398535
  0.17700000   0.02193103
  0.17700000   0.02005268
  0.17700000   0.01833521
  0.17700000   0.01676485
  0.17700000   0.01532900
  0.17700000   0.01401612
  0.17720000   0.10216704
  0.17720000   0.09347556
  0.17720000   0.08552408
  0.17720000   0.07824947
  0.17720000   0.07159400
  0.17720000   0.06550489
  0.17720000   0.05993389
  0.17720000   0.05483687
  0.17720000   0.05017345
  0.17720000   0.04590673
  0.17720000   0.04200293
  0.17720000   0.03843116
  0.17720000   0.03516318
  0.17720000   0.03217314
  0.17720000   0.02943738
  0.17720000   0.02693427
  0.17720000   0.02464403
  0.17720000   0.02254855
  0.17720000   0.02063126
  0.17720000   0.01887700
  0.17720000   0.01727192
  0.17720000   0.01580332
  0.17720000   0.01445961
  0.17740000   0.10384324
  0.17740000   0.09507334
  0.17740000   0.08704472
  0.17740000   0.07969459
  0.17740000   0.07296549
  0.17740000   0.06680488
  0.17740000   0.06116465
  0.17740000   0.05600080
  0.17740000   0.05127306
  0.17740000   0.04694456
  0.17740000   0.04298156
  0.17740000   0.03935318
  0.17740000   0.03603116
  0.17740000   0.03298961
  0.17740000   0.03020485
  0.17740000   0.02765519
  0.17740000   0.02532077
  0.17740000   0.02318342
  0.17740000   0.02122650
  0.17740000   0.01943478
  0.17740000   0.01779431
  0.17740000   0.01629231
  0.17740000   0.01491710
  0.17760000   0.10554679
  0.17760000   0.09669829
  0.17760000   0.08859227
  0.17760000   0.08116628
  0.17760000   0.07436316
  0.17760000   0.06813056
  0.17760000   0.06242059
  0.17760000   0.05718936
  0.17760000   0.05239669
  0.17760000   0.04800578
  0.17760000   0.04398293
  0.17760000   0.04029727
  0.17760000   0.03692051
  0.17760000   0.03382676
  0.17760000   0.03099229
  0.17760000   0.02839536
  0.17760000   0.02601606
  0.17760000   0.02383614
  0.17760000   0.02183889
  0.17760000   0.02000901
  0.17760000   0.01833247
  0.17760000   0.01679641
  0.17760000   0.01538906
  0.17780000   0.10727813
  0.17780000   0.09835088
  0.17780000   0.09016721
  0.17780000   0.08266503
  0.17780000   0.07578748
  0.17780000   0.06948245
  0.17780000   0.06370222
  0.17780000   0.05840305
  0.17780000   0.05354486
  0.17780000   0.04909092
  0.17780000   0.04500756
  0.17780000   0.04126394
  0.17780000   0.03783176
  0.17780000   0.03468510
  0.17780000   0.03180021
  0.17780000   0.02915530
  0.17780000   0.02673040
  0.17780000   0.02450720
  0.17780000   0.02246892
  0.17780000   0.02060018
  0.17780000   0.01888688
  0.17780000   0.01731608
  0.17780000   0.01587592
  0.17800000   0.10903771
  0.17800000   0.10003156
  0.17800000   0.09177000
  0.17800000   0.08419133
  0.17800000   0.07723896
  0.17800000   0.07086106
  0.17800000   0.06501007
  0.17800000   0.05964241
  0.17800000   0.05471811
  0.17800000   0.05020051
  0.17800000   0.04605600
  0.17800000   0.04225373
  0.17800000   0.03876544
  0.17800000   0.03556517
  0.17800000   0.03262915
  0.17800000   0.02993553
  0.17800000   0.02746431
  0.17800000   0.02519711
  0.17800000   0.02311709
  0.17800000   0.02120879
  0.17800000   0.01945803
  0.17800000   0.01785180
  0.17800000   0.01637817
  0.17820000   0.11082599
  0.17820000   0.10174081
  0.17820000   0.09340115
  0.17820000   0.08574567
  0.17820000   0.07871812
  0.17820000   0.07226690
  0.17820000   0.06634467
  0.17820000   0.06090798
  0.17820000   0.05591698
  0.17820000   0.05133510
  0.17820000   0.04712878
  0.17820000   0.04326720
  0.17820000   0.03972209
  0.17820000   0.03646751
  0.17820000   0.03347964
  0.17820000   0.03073660
  0.17820000   0.02821833
  0.17820000   0.02590641
  0.17820000   0.02378392
  0.17820000   0.02183534
  0.17820000   0.02004642
  0.17820000   0.01840407
  0.17820000   0.01689628
  0.17840000   0.11264343
  0.17840000   0.10347910
  0.17840000   0.09506113
  0.17840000   0.08732857
  0.17840000   0.08022548
  0.17840000   0.07370052
  0.17840000   0.06770655
  0.17840000   0.06220029
  0.17840000   0.05714202
  0.17840000   0.05249525
  0.17840000   0.04822646
  0.17840000   0.04430490
  0.17840000   0.04070229
  0.17840000   0.03739269
  0.17840000   0.03435224
  0.17840000   0.03155905
  0.17840000   0.02899301
  0.17840000   0.02663563
  0.17840000   0.02446995
  0.17840000   0.02248037
  0.17840000   0.02065257
  0.17840000   0.01897340
  0.17840000   0.01743075
  0.17860000   0.11449048
  0.17860000   0.10524692
  0.17860000   0.09675046
  0.17860000   0.08894054
  0.17860000   0.08176157
  0.17860000   0.07516245
  0.17860000   0.06909627
  0.17860000   0.06351992
  0.17860000   0.05839380
  0.17860000   0.05368152
  0.17860000   0.04934964
  0.17860000   0.04536741
  0.17860000   0.04170661
  0.17860000   0.03834127
  0.17860000   0.03524753
  0.17860000   0.03240346
  0.17860000   0.02978891
  0.17860000   0.02738534
  0.17860000   0.02517573
  0.17860000   0.02314442
  0.17860000   0.02127702
  0.17860000   0.01956030
  0.17860000   0.01798211
  0.17880000   0.11636764
  0.17880000   0.10704476
  0.17880000   0.09846964
  0.17880000   0.09058212
  0.17880000   0.08332692
  0.17880000   0.07665324
  0.17880000   0.07051439
  0.17880000   0.06486743
  0.17880000   0.05967290
  0.17880000   0.05489451
  0.17880000   0.05049888
  0.17880000   0.04645533
  0.17880000   0.04273564
  0.17880000   0.03931384
  0.17880000   0.03616609
  0.17880000   0.03327040
  0.17880000   0.03060660
  0.17880000   0.02815610
  0.17880000   0.02590182
  0.17880000   0.02382804
  0.17880000   0.02192031
  0.17880000   0.02016533
  0.17880000   0.01855087
  0.17900000   0.11827538
  0.17900000   0.10887313
  0.17900000   0.10021920
  0.17900000   0.09225383
  0.17900000   0.08492209
  0.17900000   0.07817347
  0.17900000   0.07196149
  0.17900000   0.06624341
  0.17900000   0.06097991
  0.17900000   0.05613480
  0.17900000   0.05167479
  0.17900000   0.04756924
  0.17900000   0.04378997
  0.17900000   0.04031102
  0.17900000   0.03710852
  0.17900000   0.03416048
  0.17900000   0.03144668
  0.17900000   0.02894850
  0.17900000   0.02664880
  0.17900000   0.02453182
  0.17900000   0.02258302
  0.17900000   0.02078904
  0.17900000   0.01913759
  0.17920000   0.12021419
  0.17920000   0.11073254
  0.17920000   0.10199966
  0.17920000   0.09395622
  0.17920000   0.08654765
  0.17920000   0.07972370
  0.17920000   0.07343815
  0.17920000   0.06764845
  0.17920000   0.06231543
  0.17920000   0.05740301
  0.17920000   0.05287798
  0.17920000   0.04870978
  0.17920000   0.04487023
  0.17920000   0.04133341
  0.17920000   0.03807543
  0.17920000   0.03507430
  0.17920000   0.03230976
  0.17920000   0.02976315
  0.17920000   0.02741728
  0.17920000   0.02525633
  0.17920000   0.02326572
  0.17920000   0.02143201
  0.17920000   0.01974284
  0.17940000   0.12218456
  0.17940000   0.11262351
  0.17940000   0.10381157
  0.17940000   0.09568986
  0.17940000   0.08820415
  0.17940000   0.08130452
  0.17940000   0.07494497
  0.17940000   0.06908316
  0.17940000   0.06368007
  0.17940000   0.05869975
  0.17940000   0.05410909
  0.17940000   0.04987757
  0.17940000   0.04597706
  0.17940000   0.04238165
  0.17940000   0.03906747
  0.17940000   0.03601250
  0.17940000   0.03319647
  0.17940000   0.03060066
  0.17940000   0.02820787
  0.17940000   0.02600219
  0.17940000   0.02396901
  0.17940000   0.02209482
  0.17940000   0.02036719
  0.17960000   0.12418702
  0.17960000   0.11454656
  0.17960000   0.10565547
  0.17960000   0.09745530
  0.17960000   0.08989219
  0.17960000   0.08291652
  0.17960000   0.07648256
  0.17960000   0.07054816
  0.17960000   0.06507447
  0.17960000   0.06002568
  0.17960000   0.05536875
  0.17960000   0.05107325
  0.17960000   0.04711109
  0.17960000   0.04345639
  0.17960000   0.04008528
  0.17960000   0.03697573
  0.17960000   0.03410744
  0.17960000   0.03146169
  0.17960000   0.02902119
  0.17960000   0.02677003
  0.17960000   0.02469351
  0.17960000   0.02277808
  0.17960000   0.02101124
  0.17980000   0.12622205
  0.17980000   0.11650222
  0.17980000   0.10753191
  0.17980000   0.09925312
  0.17980000   0.09161235
  0.17980000   0.08456032
  0.17980000   0.07805154
  0.17980000   0.07204408
  0.17980000   0.06649927
  0.17980000   0.06138143
  0.17980000   0.05665762
  0.17980000   0.05229749
  0.17980000   0.04827300
  0.17980000   0.04455829
  0.17980000   0.04112952
  0.17980000   0.03796464
  0.17980000   0.03504334
  0.17980000   0.03234687
  0.17980000   0.02985791
  0.17980000   0.02756049
  0.17980000   0.02543987
  0.17980000   0.02348243
  0.17980000   0.02167562
  0.18000000   0.12829020
  0.18000000   0.11849105
  0.18000000   0.10944147
  0.18000000   0.10108390
  0.18000000   0.09336525
  0.18000000   0.08623652
  0.18000000   0.07965254
  0.18000000   0.07357157
  0.18000000   0.06795513
  0.18000000   0.06276766
  0.18000000   0.05797637
  0.18000000   0.05355096
  0.18000000   0.04946346
  0.18000000   0.04568804
  0.18000000   0.04220087
  0.18000000   0.03897992
  0.18000000   0.03600485
  0.18000000   0.03325689
  0.18000000   0.03071869
  0.18000000   0.02837423
  0.18000000   0.02620873
  0.18000000   0.02420851
  0.18000000   0.02236096
  0.18020000   0.13039198
  0.18020000   0.12051359
  0.18020000   0.11138471
  0.18020000   0.10294824
  0.18020000   0.09515148
  0.18020000   0.08794577
  0.18020000   0.08128620
  0.18020000   0.07513129
  0.18020000   0.06944270
  0.18020000   0.06418507
  0.18020000   0.05932569
  0.18020000   0.05483435
  0.18020000   0.05068316
  0.18020000   0.04684633
  0.18020000   0.04330004
  0.18020000   0.04002226
  0.18020000   0.03699266
  0.18020000   0.03419244
  0.18020000   0.03160422
  0.18020000   0.02921194
  0.18020000   0.02700077
  0.18020000   0.02495699
  0.18020000   0.02306792
  0.18040000   0.13252793
  0.18040000   0.12257041
  0.18040000   0.11336222
  0.18040000   0.10484675
  0.18040000   0.09697168
  0.18040000   0.08968871
  0.18040000   0.08295320
  0.18040000   0.07672390
  0.18040000   0.07096269
  0.18040000   0.06563434
  0.18040000   0.06070627
  0.18040000   0.05614838
  0.18040000   0.05193283
  0.18040000   0.04803388
  0.18040000   0.04442773
  0.18040000   0.04109238
  0.18040000   0.03800749
  0.18040000   0.03515423
  0.18040000   0.03251520
  0.18040000   0.03007431
  0.18040000   0.02781668
  0.18040000   0.02572855
  0.18040000   0.02379718
  0.18060000   0.13469860
  0.18060000   0.12466207
  0.18060000   0.11537460
  0.18060000   0.10678003
  0.18060000   0.09882648
  0.18060000   0.09146598
  0.18060000   0.08465419
  0.18060000   0.07835009
  0.18060000   0.07251578
  0.18060000   0.06711617
  0.18060000   0.06211884
  0.18060000   0.05749376
  0.18060000   0.05321318
  0.18060000   0.04925141
  0.18060000   0.04558469
  0.18060000   0.04219102
  0.18060000   0.03905006
  0.18060000   0.03614298
  0.18060000   0.03345236
  0.18060000   0.03096207
  0.18060000   0.02865719
  0.18060000   0.02652390
  0.18060000   0.02454945
  0.18080000   0.13690453
  0.18080000   0.12678916
  0.18080000   0.11742244
  0.18080000   0.10874873
  0.18080000   0.10071654
  0.18080000   0.09327826
  0.18080000   0.08638985
  0.18080000   0.08001056
  0.18080000   0.07410268
  0.18080000   0.06863130
  0.18080000   0.06356412
  0.18080000   0.05887124
  0.18080000   0.05452497
  0.18080000   0.05049969
  0.18080000   0.04677167
  0.18080000   0.04331893
  0.18080000   0.04012114
  0.18080000   0.03715946
  0.18080000   0.03441645
  0.18080000   0.03187596
  0.18080000   0.02952302
  0.18080000   0.02734378
  0.18080000   0.02532543
  0.18100000   0.13914630
  0.18100000   0.12895225
  0.18100000   0.11950637
  0.18100000   0.11075347
  0.18100000   0.10264250
  0.18100000   0.09512623
  0.18100000   0.08816090
  0.18100000   0.08170603
  0.18100000   0.07572413
  0.18100000   0.07018046
  0.18100000   0.06504287
  0.18100000   0.06028157
  0.18100000   0.05586896
  0.18100000   0.05177948
  0.18100000   0.04798943
  0.18100000   0.04447688
  0.18100000   0.04122150
  0.18100000   0.03820444
  0.18100000   0.03540824
  0.18100000   0.03281674
  0.18100000   0.03041493
  0.18100000   0.02818894
  0.18100000   0.02612588
  0.18120000   0.14142447
  0.18120000   0.13115196
  0.18120000   0.12162700
  0.18120000   0.11279490
  0.18120000   0.10460505
  0.18120000   0.09701057
  0.18120000   0.08996803
  0.18120000   0.08343722
  0.18120000   0.07738086
  0.18120000   0.07176441
  0.18120000   0.06655586
  0.18120000   0.06172553
  0.18120000   0.05724593
  0.18120000   0.05309156
  0.18120000   0.04923878
  0.18120000   0.04566567
  0.18120000   0.04235192
  0.18120000   0.03927870
  0.18120000   0.03642852
  0.18120000   0.03378520
  0.18120000   0.03133372
  0.18120000   0.02906014
  0.18120000   0.02695156
  0.18140000   0.14373961
  0.18140000   0.13338889
  0.18140000   0.12378497
  0.18140000   0.11487368
  0.18140000   0.10660486
  0.18140000   0.09893199
  0.18140000   0.09181198
  0.18140000   0.08520488
  0.18140000   0.07907364
  0.18140000   0.07338392
  0.18140000   0.06810386
  0.18140000   0.06320392
  0.18140000   0.05865669
  0.18140000   0.05443675
  0.18140000   0.05052051
  0.18140000   0.04688611
  0.18140000   0.04351323
  0.18140000   0.04038306
  0.18140000   0.03747810
  0.18140000   0.03478216
  0.18140000   0.03228017
  0.18140000   0.02995819
  0.18140000   0.02780326
  0.18160000   0.14609232
  0.18160000   0.13566365
  0.18160000   0.12598092
  0.18160000   0.11699049
  0.18160000   0.10864262
  0.18160000   0.10089121
  0.18160000   0.09369348
  0.18160000   0.08700975
  0.18160000   0.08080324
  0.18160000   0.07503978
  0.18160000   0.06968768
  0.18160000   0.06471754
  0.18160000   0.06010205
  0.18160000   0.05581587
  0.18160000   0.05183548
  0.18160000   0.04813903
  0.18160000   0.04470627
  0.18160000   0.04151835
  0.18160000   0.03855782
  0.18160000   0.03580843
  0.18160000   0.03325513
  0.18160000   0.03088391
  0.18160000   0.02868180
  0.18180000   0.14848319
  0.18180000   0.13797687
  0.18180000   0.12821552
  0.18180000   0.11914600
  0.18180000   0.11071906
  0.18180000   0.10288896
  0.18180000   0.09561327
  0.18180000   0.08885262
  0.18180000   0.08257044
  0.18180000   0.07673279
  0.18180000   0.07130814
  0.18180000   0.06626722
  0.18180000   0.06158285
  0.18180000   0.05722977
  0.18180000   0.05318451
  0.18180000   0.04942530
  0.18180000   0.04593188
  0.18180000   0.04268545
  0.18180000   0.03966853
  0.18180000   0.03686488
  0.18180000   0.03425943
  0.18180000   0.03183815
  0.18180000   0.02958802
  0.18200000   0.15091283
  0.18200000   0.14032919
  0.18200000   0.13048941
  0.18200000   0.12134092
  0.18200000   0.11283488
  0.18200000   0.10492599
  0.18200000   0.09757214
  0.18200000   0.09073427
  0.18200000   0.08437606
  0.18200000   0.07846377
  0.18200000   0.07296607
  0.18200000   0.06785382
  0.18200000   0.06309996
  0.18200000   0.05867931
  0.18200000   0.05456850
  0.18200000   0.05074579
  0.18200000   0.04719096
  0.18200000   0.04388522
  0.18200000   0.04081111
  0.18200000   0.03795239
  0.18200000   0.03529396
  0.18200000   0.03282177
  0.18200000   0.03052278
  0.18220000   0.15338184
  0.18220000   0.14272124
  0.18220000   0.13280329
  0.18220000   0.12357594
  0.18220000   0.11499082
  0.18220000   0.10700304
  0.18220000   0.09957087
  0.18220000   0.09265551
  0.18220000   0.08622091
  0.18220000   0.08023358
  0.18220000   0.07466233
  0.18220000   0.06947820
  0.18220000   0.06465424
  0.18220000   0.06016539
  0.18220000   0.05598834
  0.18220000   0.05210140
  0.18220000   0.04848440
  0.18220000   0.04511858
  0.18220000   0.04198648
  0.18220000   0.03907187
  0.18220000   0.03635962
  0.18220000   0.03383568
  0.18220000   0.03148698
  0.18240000   0.15589086
  0.18240000   0.14515370
  0.18240000   0.13515784
  0.18240000   0.12585178
  0.18240000   0.11718763
  0.18240000   0.10912091
  0.18240000   0.10161024
  0.18240000   0.09461714
  0.18240000   0.08810584
  0.18240000   0.08204305
  0.18240000   0.07639779
  0.18240000   0.07114125
  0.18240000   0.06624661
  0.18240000   0.06168892
  0.18240000   0.05744494
  0.18240000   0.05349306
  0.18240000   0.04981314
  0.18240000   0.04638646
  0.18240000   0.04319557
  0.18240000   0.04022424
  0.18240000   0.03745734
  0.18240000   0.03488081
  0.18240000   0.03248154
  0.18260000   0.15844050
  0.18260000   0.14762722
  0.18260000   0.13755376
  0.18260000   0.12816917
  0.18260000   0.11942607
  0.18260000   0.11128037
  0.18260000   0.10369107
  0.18260000   0.09662002
  0.18260000   0.09003170
  0.18260000   0.08389307
  0.18260000   0.07817335
  0.18260000   0.07284388
  0.18260000   0.06787799
  0.18260000   0.06325082
  0.18260000   0.05893925
  0.18260000   0.05492171
  0.18260000   0.05117813
  0.18260000   0.04768981
  0.18260000   0.04443933
  0.18260000   0.04141046
  0.18260000   0.03858808
  0.18260000   0.03595810
  0.18260000   0.03350741
  0.18280000   0.16103142
  0.18280000   0.15014247
  0.18280000   0.13999176
  0.18280000   0.13052887
  0.18280000   0.12170690
  0.18280000   0.11348222
  0.18280000   0.10581419
  0.18280000   0.09866499
  0.18280000   0.09199937
  0.18280000   0.08578454
  0.18280000   0.07998991
  0.18280000   0.07458701
  0.18280000   0.06954931
  0.18280000   0.06485206
  0.18280000   0.06047223
  0.18280000   0.05638833
  0.18280000   0.05258035
  0.18280000   0.04902963
  0.18280000   0.04571876
  0.18280000   0.04263153
  0.18280000   0.03975282
  0.18280000   0.03706854
  0.18280000   0.03456556
  0.18300000   0.16366426
  0.18300000   0.15270016
  0.18300000   0.14247255
  0.18300000   0.13293161
  0.18300000   0.12403092
  0.18300000   0.11572728
  0.18300000   0.10798045
  0.18300000   0.10075291
  0.18300000   0.09400974
  0.18300000   0.08771836
  0.18300000   0.08184842
  0.18300000   0.07637161
  0.18300000   0.07126154
  0.18300000   0.06649361
  0.18300000   0.06204487
  0.18300000   0.05789392
  0.18300000   0.05402081
  0.18300000   0.05040691
  0.18300000   0.04703485
  0.18300000   0.04388845
  0.18300000   0.04095258
  0.18300000   0.03821314
  0.18300000   0.03565700
  0.18320000   0.16633969
  0.18320000   0.15530096
  0.18320000   0.14499688
  0.18320000   0.13537816
  0.18320000   0.12639892
  0.18320000   0.11801638
  0.18320000   0.11019069
  0.18320000   0.10288469
  0.18320000   0.09606372
  0.18320000   0.08969548
  0.18320000   0.08374982
  0.18320000   0.07819863
  0.18320000   0.07301567
  0.18320000   0.06817647
  0.18320000   0.06365819
  0.18320000   0.05943951
  0.18320000   0.05550053
  0.18320000   0.05182269
  0.18320000   0.04838866
  0.18320000   0.04518226
  0.18320000   0.04218839
  0.18320000   0.03939295
  0.18320000   0.03678278
  0.18340000   0.16905837
  0.18340000   0.15794560
  0.18340000   0.14756549
  0.18340000   0.13786932
  0.18340000   0.12881172
  0.18340000   0.12035037
  0.18340000   0.11244581
  0.18340000   0.10506121
  0.18340000   0.09816224
  0.18340000   0.09171684
  0.18340000   0.08569509
  0.18340000   0.08006908
  0.18340000   0.07481272
  0.18340000   0.06990167
  0.18340000   0.06531322
  0.18340000   0.06102613
  0.18340000   0.05702057
  0.18340000   0.05327805
  0.18340000   0.04978126
  0.18340000   0.04651405
  0.18340000   0.04346134
  0.18340000   0.04060903
  0.18340000   0.03794396
  0.18360000   0.17182097
  0.18360000   0.16063479
  0.18360000   0.15017913
  0.18360000   0.14040587
  0.18360000   0.13127015
  0.18360000   0.12273011
  0.18360000   0.11474668
  0.18360000   0.10728341
  0.18360000   0.10030625
  0.18360000   0.09378342
  0.18360000   0.08768523
  0.18360000   0.08198396
  0.18360000   0.07665371
  0.18360000   0.07167026
  0.18360000   0.06701103
  0.18360000   0.06265486
  0.18360000   0.05858203
  0.18360000   0.05477407
  0.18360000   0.05121373
  0.18360000   0.04788491
  0.18360000   0.04477252
  0.18360000   0.04186249
  0.18360000   0.03914165
  0.18380000   0.17462820
  0.18380000   0.16336926
  0.18380000   0.15283857
  0.18380000   0.14298862
  0.18380000   0.13377505
  0.18380000   0.12515647
  0.18380000   0.11709423
  0.18380000   0.10955222
  0.18380000   0.10249671
  0.18380000   0.09589621
  0.18380000   0.08972125
  0.18380000   0.08394433
  0.18380000   0.07853970
  0.18380000   0.07348332
  0.18380000   0.06875270
  0.18380000   0.06432682
  0.18380000   0.06018600
  0.18380000   0.05631187
  0.18380000   0.05268722
  0.18380000   0.04929597
  0.18380000   0.04612308
  0.18380000   0.04315447
  0.18380000   0.04037698
  0.18400000   0.17748075
  0.18400000   0.16614974
  0.18400000   0.15554460
  0.18400000   0.14561838
  0.18400000   0.13632727
  0.18400000   0.12763035
  0.18400000   0.11948937
  0.18400000   0.11186859
  0.18400000   0.10473462
  0.18400000   0.09805622
  0.18400000   0.09180420
  0.18400000   0.08595123
  0.18400000   0.08047178
  0.18400000   0.07534195
  0.18400000   0.07053937
  0.18400000   0.06604313
  0.18400000   0.06183365
  0.18400000   0.05789262
  0.18400000   0.05420289
  0.18400000   0.05074842
  0.18400000   0.04751419
  0.18400000   0.04448614
  0.18400000   0.04165113
  0.18420000   0.18037933
  0.18420000   0.16897700
  0.18420000   0.15829800
  0.18420000   0.14829599
  0.18420000   0.13892770
  0.18420000   0.13015265
  0.18420000   0.12193304
  0.18420000   0.11423351
  0.18420000   0.10702098
  0.18420000   0.10026450
  0.18420000   0.09393513
  0.18420000   0.08800577
  0.18420000   0.08245106
  0.18420000   0.07724727
  0.18420000   0.07237216
  0.18420000   0.06780495
  0.18420000   0.06352614
  0.18420000   0.05951749
  0.18420000   0.05576192
  0.18420000   0.05224343
  0.18420000   0.04894704
  0.18420000   0.04585872
  0.18420000   0.04296531
  0.18440000   0.18332465
  0.18440000   0.17185179
  0.18440000   0.16109959
  0.18440000   0.15102231
  0.18440000   0.14157720
  0.18440000   0.13272431
  0.18440000   0.12442622
  0.18440000   0.11664797
  0.18440000   0.10935682
  0.18440000   0.10252210
  0.18440000   0.09611513
  0.18440000   0.09010904
  0.18440000   0.08447867
  0.18440000   0.07920044
  0.18440000   0.07425226
  0.18440000   0.06961347
  0.18440000   0.06526467
  0.18440000   0.06118770
  0.18440000   0.05736554
  0.18440000   0.05378226
  0.18440000   0.05042289
  0.18440000   0.04727343
  0.18440000   0.04432076
  0.18460000   0.18631745
  0.18460000   0.17477490
  0.18460000   0.16395018
  0.18460000   0.15379818
  0.18460000   0.14427670
  0.18460000   0.13534625
  0.18460000   0.12696988
  0.18460000   0.11911299
  0.18460000   0.11174318
  0.18460000   0.10483010
  0.18460000   0.09834531
  0.18460000   0.09226219
  0.18460000   0.08655577
  0.18460000   0.08120264
  0.18460000   0.07618087
  0.18460000   0.07146991
  0.18460000   0.06705048
  0.18460000   0.06290450
  0.18460000   0.05901502
  0.18460000   0.05536616
  0.18460000   0.05194300
  0.18460000   0.04873157
  0.18460000   0.04571876
  0.18480000   0.18935847
  0.18480000   0.17774709
  0.18480000   0.16685060
  0.18480000   0.15662449
  0.18480000   0.14702710
  0.18480000   0.13801945
  0.18480000   0.12956502
  0.18480000   0.12162960
  0.18480000   0.11418114
  0.18480000   0.10718959
  0.18480000   0.10062681
  0.18480000   0.09446638
  0.18480000   0.08868354
  0.18480000   0.08325508
  0.18480000   0.07815922
  0.18480000   0.07337553
  0.18480000   0.06888484
  0.18480000   0.06466917
  0.18480000   0.06071165
  0.18480000   0.05699644
  0.18480000   0.05350868
  0.18480000   0.05023444
  0.18480000   0.04716063
  0.18500000   0.19244845
  0.18500000   0.18076918
  0.18500000   0.16980170
  0.18500000   0.15950212
  0.18500000   0.14982935
  0.18500000   0.14074488
  0.18500000   0.13221265
  0.18500000   0.12419885
  0.18500000   0.11667178
  0.18500000   0.10960172
  0.18500000   0.10296077
  0.18500000   0.09672278
  0.18500000   0.09086321
  0.18500000   0.08535901
  0.18500000   0.08018857
  0.18500000   0.07533160
  0.18500000   0.07076905
  0.18500000   0.06648303
  0.18500000   0.06245675
  0.18500000   0.05867444
  0.18500000   0.05512129
  0.18500000   0.05178342
  0.18500000   0.04864774
  0.18520000   0.19558816
  0.18520000   0.18384197
  0.18520000   0.17280434
  0.18520000   0.16243198
  0.18520000   0.15268438
  0.18520000   0.14352352
  0.18520000   0.13491381
  0.18520000   0.12682182
  0.18520000   0.11921623
  0.18520000   0.11206762
  0.18520000   0.10534838
  0.18520000   0.09903262
  0.18520000   0.09309601
  0.18520000   0.08751569
  0.18520000   0.08227022
  0.18520000   0.07733945
  0.18520000   0.07270444
  0.18520000   0.06834743
  0.18520000   0.06425169
  0.18520000   0.06040154
  0.18520000   0.05678222
  0.18520000   0.05337988
  0.18520000   0.05018149
  0.18540000   0.19877836
  0.18540000   0.18696629
  0.18540000   0.17585938
  0.18540000   0.16541499
  0.18540000   0.15559316
  0.18540000   0.14635640
  0.18540000   0.13766955
  0.18540000   0.12949961
  0.18540000   0.12181561
  0.18540000   0.11458846
  0.18540000   0.10779085
  0.18540000   0.10139714
  0.18540000   0.09538321
  0.18540000   0.08972642
  0.18540000   0.08440548
  0.18540000   0.07940041
  0.18540000   0.07469239
  0.18540000   0.07026375
  0.18540000   0.06609788
  0.18540000   0.06217916
  0.18540000   0.05849289
  0.18540000   0.05502528
  0.18540000   0.05176333
  0.18560000   0.20201985
  0.18560000   0.19014296
  0.18560000   0.17896771
  0.18560000   0.16845208
  0.18560000   0.15855668
  0.18560000   0.14924453
  0.18560000   0.14048094
  0.18560000   0.13223332
  0.18560000   0.12447107
  0.18560000   0.11716544
  0.18560000   0.11028942
  0.18560000   0.10381759
  0.18560000   0.09772611
  0.18560000   0.09199252
  0.18560000   0.08659572
  0.18560000   0.08151586
  0.18560000   0.07673428
  0.18560000   0.07223342
  0.18560000   0.06799675
  0.18560000   0.06400875
  0.18560000   0.06025478
  0.18560000   0.05672109
  0.18560000   0.05339474
  0.18580000   0.20531340
  0.18580000   0.19337284
  0.18580000   0.18213023
  0.18580000   0.17154420
  0.18580000   0.16157593
  0.18580000   0.15218897
  0.18580000   0.14334908
  0.18580000   0.13502411
  0.18580000   0.12718381
  0.18580000   0.11979979
  0.18580000   0.11284533
  0.18580000   0.10629529
  0.18580000   0.10012604
  0.18580000   0.09431536
  0.18580000   0.08884232
  0.18580000   0.08368724
  0.18580000   0.07883158
  0.18580000   0.07425790
  0.18580000   0.06994980
  0.18580000   0.06589181
  0.18580000   0.06206939
  0.18580000   0.05846884
  0.18580000   0.05507726
  0.18600000   0.20865983
  0.18600000   0.19665677
  0.18600000   0.18534784
  0.18600000   0.17469231
  0.18600000   0.16465193
  0.18600000   0.15519078
  0.18600000   0.14627508
  0.18600000   0.13787311
  0.18600000   0.12995503
  0.18600000   0.12249275
  0.18600000   0.11545987
  0.18600000   0.10883154
  0.18600000   0.10258437
  0.18600000   0.09669634
  0.18600000   0.09114671
  0.18600000   0.08591597
  0.18600000   0.08098574
  0.18600000   0.07633869
  0.18600000   0.07195853
  0.18600000   0.06782988
  0.18600000   0.06393828
  0.18600000   0.06027009
  0.18600000   0.05681247
  0.18620000   0.21205995
  0.18620000   0.19999564
  0.18620000   0.18862148
  0.18620000   0.17789739
  0.18620000   0.16778571
  0.18620000   0.15825103
  0.18620000   0.14926007
  0.18620000   0.14078153
  0.18620000   0.13278594
  0.18620000   0.12524558
  0.18620000   0.11813436
  0.18620000   0.11142770
  0.18620000   0.10510247
  0.18620000   0.09913686
  0.18620000   0.09351034
  0.18620000   0.08820356
  0.18620000   0.08319829
  0.18620000   0.07847733
  0.18620000   0.07402451
  0.18620000   0.06982455
  0.18620000   0.06586306
  0.18620000   0.06212647
  0.18620000   0.05860199
  0.18640000   0.21551459
  0.18640000   0.20339031
  0.18640000   0.19195208
  0.18640000   0.18116044
  0.18640000   0.17097832
  0.18640000   0.16137084
  0.18640000   0.15230521
  0.18640000   0.14375055
  0.18640000   0.13567780
  0.18640000   0.12805959
  0.18640000   0.12087014
  0.18640000   0.11408516
  0.18640000   0.10768177
  0.18640000   0.10163840
  0.18640000   0.09593471
  0.18640000   0.09055152
  0.18640000   0.08547077
  0.18640000   0.08067540
  0.18640000   0.07614935
  0.18640000   0.07187743
  0.18640000   0.06784535
  0.18640000   0.06403962
  0.18640000   0.06044751
  0.18660000   0.21902458
  0.18660000   0.20684170
  0.18660000   0.19534060
  0.18660000   0.18448247
  0.18660000   0.17423082
  0.18660000   0.16455133
  0.18660000   0.15541167
  0.18660000   0.14678141
  0.18660000   0.13863189
  0.18660000   0.13093609
  0.18660000   0.12366857
  0.18660000   0.11680532
  0.18660000   0.11032373
  0.18660000   0.10420244
  0.18660000   0.09842133
  0.18660000   0.09296142
  0.18660000   0.08780479
  0.18660000   0.08293452
  0.18660000   0.07833468
  0.18660000   0.07399020
  0.18660000   0.06988687
  0.18660000   0.06601127
  0.18660000   0.06235074
  0.18680000   0.22259077
  0.18680000   0.21035070
  0.18680000   0.19878799
  0.18680000   0.18786449
  0.18680000   0.17754430
  0.18680000   0.16779363
  0.18680000   0.15858064
  0.18680000   0.14987535
  0.18680000   0.14164950
  0.18680000   0.13387644
  0.18680000   0.12653105
  0.18680000   0.11958963
  0.18680000   0.11302982
  0.18680000   0.10683051
  0.18680000   0.10097179
  0.18680000   0.09543485
  0.18680000   0.09020196
  0.18680000   0.08525636
  0.18680000   0.08058221
  0.18680000   0.07616457
  0.18680000   0.07198934
  0.18680000   0.06804316
  0.18680000   0.06431346
  0.18700000   0.22621402
  0.18700000   0.21391824
  0.18700000   0.20229525
  0.18700000   0.19130756
  0.18700000   0.18091986
  0.18700000   0.17109889
  0.18700000   0.16181333
  0.18700000   0.15303364
  0.18700000   0.14473196
  0.18700000   0.13688202
  0.18700000   0.12945902
  0.18700000   0.12243956
  0.18700000   0.11580156
  0.18700000   0.10952416
  0.18700000   0.10358766
  0.18700000   0.09797346
  0.18700000   0.09266398
  0.18700000   0.08764261
  0.18700000   0.08289366
  0.18700000   0.07840231
  0.18700000   0.07415455
  0.18700000   0.07013712
  0.18700000   0.06633751
  0.18720000   0.22989520
  0.18720000   0.21754524
  0.18720000   0.20586337
  0.18720000   0.19481273
  0.18720000   0.18435861
  0.18720000   0.17446831
  0.18720000   0.16511100
  0.18720000   0.15625758
  0.18720000   0.14788062
  0.18720000   0.13995421
  0.18720000   0.13245391
  0.18720000   0.12535661
  0.18720000   0.11864052
  0.18720000   0.11228500
  0.18720000   0.10627061
  0.18720000   0.10057892
  0.18720000   0.09519254
  0.18720000   0.09009503
  0.18720000   0.08527083
  0.18720000   0.08070524
  0.18720000   0.07638435
  0.18720000   0.07229501
  0.18720000   0.06842478
  0.18740000   0.23363519
  0.18740000   0.22123266
  0.18740000   0.20949336
  0.18740000   0.19838107
  0.18740000   0.18786170
  0.18740000   0.17790308
  0.18740000   0.16847489
  0.18740000   0.15954849
  0.18740000   0.15109685
  0.18740000   0.14309447
  0.18740000   0.13551722
  0.18740000   0.12834233
  0.18740000   0.12154826
  0.18740000   0.11511466
  0.18740000   0.10902229
  0.18740000   0.10325295
  0.18740000   0.09778942
  0.18740000   0.09261541
  0.18740000   0.08771553
  0.18740000   0.08307520
  0.18740000   0.07868062
  0.18740000   0.07451873
  0.18740000   0.07057719
  0.18760000   0.23743489
  0.18760000   0.22498146
  0.18760000   0.21318624
  0.18760000   0.20201368
  0.18760000   0.19143028
  0.18760000   0.18140442
  0.18760000   0.17190629
  0.18760000   0.16290770
  0.18760000   0.15438207
  0.18760000   0.14630424
  0.18760000   0.13865046
  0.18760000   0.13139827
  0.18760000   0.12452642
  0.18760000   0.11801481
  0.18760000   0.11184444
  0.18760000   0.10599731
  0.18760000   0.10045641
  0.18760000   0.09520561
  0.18760000   0.09022966
  0.18760000   0.08551411
  0.18760000   0.08104530
  0.18760000   0.07681027
  0.18760000   0.07279675
  0.18780000   0.24129520
  0.18780000   0.22879261
  0.18780000   0.21694306
  0.18780000   0.20571166
  0.18780000   0.19506551
  0.18780000   0.18497357
  0.18780000   0.17540649
  0.18780000   0.16633659
  0.18780000   0.15773768
  0.18780000   0.14958502
  0.18780000   0.14185518
  0.18780000   0.13452604
  0.18780000   0.12757664
  0.18780000   0.12098715
  0.18780000   0.11473880
  0.18780000   0.10881381
  0.18780000   0.10319536
  0.18780000   0.09786750
  0.18780000   0.09281513
  0.18780000   0.08802395
  0.18780000   0.08348040
  0.18780000   0.07917164
  0.18780000   0.07508551
  0.18800000   0.24521704
  0.18800000   0.23266709
  0.18800000   0.22076486
  0.18800000   0.20947614
  0.18800000   0.19876861
  0.18800000   0.18861178
  0.18800000   0.17897684
  0.18800000   0.16983655
  0.18800000   0.16116516
  0.18800000   0.15293831
  0.18800000   0.14513296
  0.18800000   0.13772728
  0.18800000   0.13070063
  0.18800000   0.12403343
  0.18800000   0.11770717
  0.18800000   0.11170429
  0.18800000   0.10600816
  0.18800000   0.10060302
  0.18800000   0.09547392
  0.18800000   0.09060672
  0.18800000   0.08598797
  0.18800000   0.08160495
  0.18800000   0.07744559
  0.18820000   0.24920133
  0.18820000   0.23660590
  0.18820000   0.22465273
  0.18820000   0.21330825
  0.18820000   0.20254076
  0.18820000   0.19232034
  0.18820000   0.18261866
  0.18820000   0.17340898
  0.18820000   0.16466598
  0.18820000   0.15636568
  0.18820000   0.14848540
  0.18820000   0.14100366
  0.18820000   0.13390010
  0.18820000   0.12715544
  0.18820000   0.12075140
  0.18820000   0.11467065
  0.18820000   0.10889676
  0.18820000   0.10341416
  0.18820000   0.09820808
  0.18820000   0.09326449
  0.18820000   0.08857011
  0.18820000   0.08411232
  0.18820000   0.07987917
  0.18840000   0.25324902
  0.18840000   0.24061006
  0.18840000   0.22860774
  0.18840000   0.21720915
  0.18840000   0.20638321
  0.18840000   0.19610054
  0.18840000   0.18633335
  0.18840000   0.17705534
  0.18840000   0.16824165
  0.18840000   0.15986869
  0.18840000   0.15191415
  0.18840000   0.14435688
  0.18840000   0.13717684
  0.18840000   0.13035500
  0.18840000   0.12387336
  0.18840000   0.11771481
  0.18840000   0.11186314
  0.18840000   0.10630296
  0.18840000   0.10101966
  0.18840000   0.09599940
  0.18840000   0.09122900
  0.18840000   0.08669598
  0.18840000   0.08238848
  0.18860000   0.25736107
  0.18860000   0.24468059
  0.18860000   0.23263099
  0.18860000   0.22118002
  0.18860000   0.21029721
  0.18860000   0.19995371
  0.18860000   0.19012228
  0.18860000   0.18077710
  0.18860000   0.17189371
  0.18860000   0.16344895
  0.18860000   0.15542089
  0.18860000   0.14778869
  0.18860000   0.14053263
  0.18860000   0.13363398
  0.18860000   0.12707498
  0.18860000   0.12083877
  0.18860000   0.11490934
  0.18860000   0.10927150
  0.18860000   0.10391083
  0.18860000   0.09881362
  0.18860000   0.09396685
  0.18860000   0.08935818
  0.18860000   0.08497584
  0.18880000   0.26153842
  0.18880000   0.24881853
  0.18880000   0.23672361
  0.18880000   0.22522206
  0.18880000   0.21428401
  0.18880000   0.20388120
  0.18880000   0.19398689
  0.18880000   0.18457573
  0.18880000   0.17562372
  0.18880000   0.16710811
  0.18880000   0.15900731
  0.18880000   0.15130085
  0.18880000   0.14396932
  0.18880000   0.13699428
  0.18880000   0.13035823
  0.18880000   0.12404455
  0.18880000   0.11803745
  0.18880000   0.11232193
  0.18880000   0.10688376
  0.18880000   0.10170940
  0.18880000   0.09678597
  0.18880000   0.09210126
  0.18880000   0.08764362
  0.18900000   0.26578206
  0.18900000   0.25302493
  0.18900000   0.24088671
  0.18900000   0.22933645
  0.18900000   0.21834491
  0.18900000   0.20788437
  0.18900000   0.19792860
  0.18900000   0.18845276
  0.18900000   0.17943328
  0.18900000   0.17084782
  0.18900000   0.16267516
  0.18900000   0.15489519
  0.18900000   0.14748880
  0.18900000   0.14043786
  0.18900000   0.13372512
  0.18900000   0.12733422
  0.18900000   0.12124959
  0.18900000   0.11545644
  0.18900000   0.10994071
  0.18900000   0.10468904
  0.18900000   0.09968870
  0.18900000   0.09492761
  0.18900000   0.09039426
  0.18920000   0.27009299
  0.18920000   0.25730087
  0.18920000   0.24512145
  0.18920000   0.23352445
  0.18920000   0.22248121
  0.18920000   0.21196459
  0.18920000   0.20194890
  0.18920000   0.19240975
  0.18920000   0.18332402
  0.18920000   0.17466978
  0.18920000   0.16642622
  0.18920000   0.15857354
  0.18920000   0.15109299
  0.18920000   0.14396670
  0.18920000   0.13717772
  0.18920000   0.13070991
  0.18920000   0.12454796
  0.18920000   0.11867728
  0.18920000   0.11308399
  0.18920000   0.10775490
  0.18920000   0.10267745
  0.18920000   0.09783970
  0.18920000   0.09323027
  0.18940000   0.27447218
  0.18940000   0.26164741
  0.18940000   0.24942898
  0.18940000   0.23778728
  0.18940000   0.22669424
  0.18940000   0.21612329
  0.18940000   0.20604926
  0.18940000   0.19644825
  0.18940000   0.18729758
  0.18940000   0.17857574
  0.18940000   0.17026229
  0.18940000   0.16233781
  0.18940000   0.15478384
  0.18940000   0.14758283
  0.18940000   0.14071811
  0.18940000   0.13417380
  0.18940000   0.12793481
  0.18940000   0.12198675
  0.18940000   0.11631595
  0.18940000   0.11090941
  0.18940000   0.10575471
  0.18940000   0.10084007
  0.18940000   0.09615423
  0.18960000   0.27892067
  0.18960000   0.26606566
  0.18960000   0.25381049
  0.18960000   0.24212620
  0.18960000   0.23098534
  0.18960000   0.22036190
  0.18960000   0.21023120
  0.18960000   0.20056986
  0.18960000   0.19135564
  0.18960000   0.18256745
  0.18960000   0.17418522
  0.18960000   0.16618990
  0.18960000   0.15856335
  0.18960000   0.15128835
  0.18960000   0.14434847
  0.18960000   0.13772811
  0.18960000   0.13141241
  0.18960000   0.12538721
  0.18960000   0.11963903
  0.18960000   0.11415505
  0.18960000   0.10892302
  0.18960000   0.10393131
  0.18960000   0.09916879
  0.18980000   0.28343946
  0.18980000   0.27055671
  0.18980000   0.25826717
  0.18980000   0.24654251
  0.18980000   0.23535588
  0.18980000   0.22468185
  0.18980000   0.21449627
  0.18980000   0.20477622
  0.18980000   0.19549992
  0.18980000   0.18664670
  0.18980000   0.17819689
  0.18980000   0.17013178
  0.18980000   0.16243358
  0.18980000   0.15508536
  0.18980000   0.14807099
  0.18980000   0.14137512
  0.18980000   0.13498312
  0.18980000   0.12888108
  0.18980000   0.12305571
  0.18980000   0.11749437
  0.18980000   0.11218500
  0.18980000   0.10711609
  0.18980000   0.10227670
  0.19000000   0.28802960
  0.19000000   0.27512170
  0.19000000   0.26280022
  0.19000000   0.25103748
  0.19000000   0.23980725
  0.19000000   0.22908463
  0.19000000   0.21884602
  0.19000000   0.20906897
  0.19000000   0.19973216
  0.19000000   0.19081534
  0.19000000   0.18229922
  0.19000000   0.17416546
  0.19000000   0.16639661
  0.19000000   0.15897604
  0.19000000   0.15188791
  0.19000000   0.14511714
  0.19000000   0.13864935
  0.19000000   0.13247084
  0.19000000   0.12656854
  0.19000000   0.12093000
  0.19000000   0.11554332
  0.19000000   0.11039718
  0.19000000   0.10548075
  0.19020000   0.29269214
  0.19020000   0.27976176
  0.19020000   0.26741087
  0.19020000   0.25561245
  0.19020000   0.24434084
  0.19020000   0.23357174
  0.19020000   0.22328204
  0.19020000   0.21344979
  0.19020000   0.20405413
  0.19020000   0.19507521
  0.19020000   0.18649415
  0.19020000   0.17829298
  0.19020000   0.17045456
  0.19020000   0.16296260
  0.19020000   0.15580154
  0.19020000   0.14895657
  0.19020000   0.14241355
  0.19020000   0.13615903
  0.19020000   0.13018014
  0.19020000   0.12446461
  0.19020000   0.11900075
  0.19020000   0.11377738
  0.19020000   0.10878383
  0.19040000   0.29742812
  0.19040000   0.28447803
  0.19040000   0.27210036
  0.19040000   0.26026872
  0.19040000   0.24895809
  0.19040000   0.23814469
  0.19040000   0.22780594
  0.19040000   0.21792039
  0.19040000   0.20846762
  0.19040000   0.19942822
  0.19040000   0.19078368
  0.19040000   0.18251641
  0.19040000   0.17460961
  0.19040000   0.16704730
  0.19040000   0.15981421
  0.19040000   0.15289582
  0.19040000   0.14627824
  0.19040000   0.13994824
  0.19040000   0.13389316
  0.19040000   0.12810096
  0.19040000   0.12256010
  0.19040000   0.11725959
  0.19040000   0.11218892
  0.19060000   0.30223863
  0.19060000   0.28927167
  0.19060000   0.27686994
  0.19060000   0.26500767
  0.19060000   0.25366043
  0.19060000   0.24280502
  0.19060000   0.23241937
  0.19060000   0.22248251
  0.19060000   0.21297448
  0.19060000   0.20387629
  0.19060000   0.19516983
  0.19060000   0.18683787
  0.19060000   0.17886396
  0.19060000   0.17123244
  0.19060000   0.16392834
  0.19060000   0.15693740
  0.19060000   0.15024600
  0.19060000   0.14384113
  0.19060000   0.13771037
  0.19060000   0.13184187
  0.19060000   0.12622429
  0.19060000   0.12084680
  0.19060000   0.11569904
  0.19080000   0.30712474
  0.19080000   0.29414386
  0.19080000   0.28172087
  0.19080000   0.26983065
  0.19080000   0.25844934
  0.19080000   0.24755430
  0.19080000   0.23712398
  0.19080000   0.22713790
  0.19080000   0.21757656
  0.19080000   0.20842138
  0.19080000   0.19965466
  0.19080000   0.19125953
  0.19080000   0.18321989
  0.19080000   0.17552038
  0.19080000   0.16814637
  0.19080000   0.16108384
  0.19080000   0.15431945
  0.19080000   0.14784043
  0.19080000   0.14163457
  0.19080000   0.13569024
  0.19080000   0.12999628
  0.19080000   0.12454205
  0.19080000   0.11931735
  0.19100000   0.31208755
  0.19100000   0.29909580
  0.19100000   0.28665446
  0.19100000   0.27473904
  0.19100000   0.26332629
  0.19100000   0.25239411
  0.19100000   0.24192147
  0.19100000   0.23188837
  0.19100000   0.22227576
  0.19100000   0.21306550
  0.19100000   0.20424027
  0.19100000   0.19578358
  0.19100000   0.18767967
  0.19100000   0.17991353
  0.19100000   0.17247079
  0.19100000   0.16533774
  0.19100000   0.15850129
  0.19100000   0.15194891
  0.19100000   0.14566864
  0.19100000   0.13964903
  0.19100000   0.13387913
  0.19100000   0.12834848
  0.19100000   0.12304705
  0.19120000   0.31712816
  0.19120000   0.30412867
  0.19120000   0.29167199
  0.19120000   0.27973426
  0.19120000   0.26829279
  0.19120000   0.25732605
  0.19120000   0.24681354
  0.19120000   0.23673572
  0.19120000   0.22707400
  0.19120000   0.21781066
  0.19120000   0.20892879
  0.19120000   0.20041227
  0.19120000   0.19224568
  0.19120000   0.18441432
  0.19120000   0.17690416
  0.19120000   0.16970175
  0.19120000   0.16279427
  0.19120000   0.15616944
  0.19120000   0.14981552
  0.19120000   0.14372128
  0.19120000   0.13787597
  0.19120000   0.13226931
  0.19120000   0.12689144
  0.19140000   0.32224769
  0.19140000   0.30924370
  0.19140000   0.29677479
  0.19140000   0.28481771
  0.19140000   0.27335037
  0.19140000   0.26235177
  0.19140000   0.25180193
  0.19140000   0.24168180
  0.19140000   0.23197324
  0.19140000   0.22265894
  0.19140000   0.21372241
  0.19140000   0.20514787
  0.19140000   0.19692029
  0.19140000   0.18902527
  0.19140000   0.18144908
  0.19140000   0.17417859
  0.19140000   0.16720121
  0.19140000   0.16050492
  0.19140000   0.15407822
  0.19140000   0.14791010
  0.19140000   0.14199001
  0.19140000   0.13630784
  0.19140000   0.13085393
  0.19160000   0.32744727
  0.19160000   0.31444212
  0.19160000   0.30196418
  0.19160000   0.28999083
  0.19160000   0.27850056
  0.19160000   0.26747291
  0.19160000   0.25688841
  0.19160000   0.24672849
  0.19160000   0.23697546
  0.19160000   0.22761244
  0.19160000   0.21862333
  0.19160000   0.20999272
  0.19160000   0.20170594
  0.19160000   0.19374892
  0.19160000   0.18610823
  0.19160000   0.17877101
  0.19160000   0.17172497
  0.19160000   0.16495834
  0.19160000   0.15845985
  0.19160000   0.15221869
  0.19160000   0.14622453
  0.19160000   0.14046746
  0.19160000   0.13493799
  0.19180000   0.33272803
  0.19180000   0.31972515
  0.19180000   0.30724151
  0.19180000   0.29525508
  0.19180000   0.28374494
  0.19180000   0.27269115
  0.19180000   0.26207476
  0.19180000   0.25187769
  0.19180000   0.24208268
  0.19180000   0.23267329
  0.19180000   0.22363379
  0.19180000   0.21494919
  0.19180000   0.20660511
  0.19180000   0.19858786
  0.19180000   0.19088429
  0.19180000   0.18348185
  0.19180000   0.17636851
  0.19180000   0.16953275
  0.19180000   0.16296354
  0.19180000   0.15665030
  0.19180000   0.15058291
  0.19180000   0.14475164
  0.19180000   0.13914719
  0.19200000   0.33809113
  0.19200000   0.32509407
  0.19200000   0.31260814
  0.19200000   0.30061193
  0.19200000   0.28908507
  0.19200000   0.27800819
  0.19200000   0.26736281
  0.19200000   0.25713133
  0.19200000   0.24729695
  0.19200000   0.23784365
  0.19200000   0.22875610
  0.19200000   0.22001966
  0.19200000   0.21162034
  0.19200000   0.20354475
  0.19200000   0.19578006
  0.19200000   0.18831400
  0.19200000   0.18113482
  0.19200000   0.17423127
  0.19200000   0.16759254
  0.19200000   0.16120829
  0.19200000   0.15506860
  0.19200000   0.14916395
  0.19200000   0.14348522
  0.19220000   0.34353773
  0.19220000   0.33055014
  0.19220000   0.31806546
  0.19220000   0.30606287
  0.19220000   0.29452258
  0.19220000   0.28342573
  0.19220000   0.27275437
  0.19220000   0.26249137
  0.19220000   0.25262036
  0.19220000   0.24312573
  0.19220000   0.23399257
  0.19220000   0.22520661
  0.19220000   0.21675420
  0.19220000   0.20862227
  0.19220000   0.20079833
  0.19220000   0.19327039
  0.19220000   0.18602697
  0.19220000   0.17905708
  0.19220000   0.17235015
  0.19220000   0.16589607
  0.19220000   0.15968514
  0.19220000   0.15370804
  0.19220000   0.14795582
  0.19240000   0.34906900
  0.19240000   0.33609463
  0.19240000   0.32361484
  0.19240000   0.31160940
  0.19240000   0.30005907
  0.19240000   0.28894554
  0.19240000   0.27825133
  0.19240000   0.26795979
  0.19240000   0.25805500
  0.19240000   0.24852177
  0.19240000   0.23934558
  0.19240000   0.23051252
  0.19240000   0.22200930
  0.19240000   0.21382319
  0.19240000   0.20594200
  0.19240000   0.19835403
  0.19240000   0.19104809
  0.19240000   0.18401343
  0.19240000   0.17723975
  0.19240000   0.17071716
  0.19240000   0.16443616
  0.19240000   0.15838764
  0.19240000   0.15256285
  0.19260000   0.35468612
  0.19260000   0.34172884
  0.19260000   0.32925769
  0.19260000   0.31725304
  0.19260000   0.30569619
  0.19260000   0.29456936
  0.19260000   0.28385556
  0.19260000   0.27353861
  0.19260000   0.26360303
  0.19260000   0.25403404
  0.19260000   0.24481751
  0.19260000   0.23593992
  0.19260000   0.22738832
  0.19260000   0.21915030
  0.19260000   0.21121399
  0.19260000   0.20356798
  0.19260000   0.19620137
  0.19260000   0.18910366
  0.19260000   0.18226479
  0.19260000   0.17567512
  0.19260000   0.16932536
  0.19260000   0.16320660
  0.19260000   0.15731029
  0.19280000   0.36039028
  0.19280000   0.34745407
  0.19280000   0.33499544
  0.19280000   0.32299533
  0.19280000   0.31143560
  0.19280000   0.30029898
  0.19280000   0.28956898
  0.19280000   0.27922987
  0.19280000   0.26926661
  0.19280000   0.25966485
  0.19280000   0.25041082
  0.19280000   0.24149139
  0.19280000   0.23289396
  0.19280000   0.22460644
  0.19280000   0.21661728
  0.19280000   0.20891537
  0.19280000   0.20149007
  0.19280000   0.19433115
  0.19280000   0.18742881
  0.19280000   0.18077363
  0.19280000   0.17435653
  0.19280000   0.16816884
  0.19280000   0.16220217
  0.19300000   0.36618269
  0.19300000   0.35327164
  0.19300000   0.34082951
  0.19300000   0.32883782
  0.19300000   0.31727898
  0.19300000   0.30613621
  0.19300000   0.29539352
  0.19300000   0.28503564
  0.19300000   0.27504796
  0.19300000   0.26541652
  0.19300000   0.25612799
  0.19300000   0.24716956
  0.19300000   0.23852898
  0.19300000   0.23019453
  0.19300000   0.22215493
  0.19300000   0.21439938
  0.19300000   0.20691752
  0.19300000   0.19969939
  0.19300000   0.19273542
  0.19300000   0.18601642
  0.19300000   0.17953357
  0.19300000   0.17327837
  0.19300000   0.16724266
  0.19320000   0.37206456
  0.19320000   0.35918288
  0.19320000   0.34676136
  0.19320000   0.33478209
  0.19320000   0.32322802
  0.19320000   0.31208288
  0.19320000   0.30133115
  0.19320000   0.29095801
  0.19320000   0.28094929
  0.19320000   0.27129145
  0.19320000   0.26197152
  0.19320000   0.25297707
  0.19320000   0.24429620
  0.19320000   0.23591750
  0.19320000   0.22783002
  0.19320000   0.22002325
  0.19320000   0.21248711
  0.19320000   0.20521189
  0.19320000   0.19818828
  0.19320000   0.19140734
  0.19320000   0.18486045
  0.19320000   0.17853933
  0.19320000   0.17243601
  0.19340000   0.37803711
  0.19340000   0.36518911
  0.19340000   0.35279243
  0.19340000   0.34082972
  0.19340000   0.32928444
  0.19340000   0.31814082
  0.19340000   0.30738383
  0.19340000   0.29699910
  0.19340000   0.28697288
  0.19340000   0.27729203
  0.19340000   0.26794397
  0.19340000   0.25891663
  0.19340000   0.25019845
  0.19340000   0.24177836
  0.19340000   0.23364571
  0.19340000   0.22579029
  0.19340000   0.21820229
  0.19340000   0.21087227
  0.19340000   0.20379118
  0.19340000   0.19695029
  0.19340000   0.19034123
  0.19340000   0.18395592
  0.19340000   0.17778659
  0.19360000   0.38410157
  0.19360000   0.37129170
  0.19360000   0.35892421
  0.19360000   0.34698230
  0.19360000   0.33544996
  0.19360000   0.32431191
  0.19360000   0.31355359
  0.19360000   0.30316107
  0.19360000   0.29312102
  0.19360000   0.28342071
  0.19360000   0.27404793
  0.19360000   0.26499098
  0.19360000   0.25623864
  0.19360000   0.24778017
  0.19360000   0.23960521
  0.19360000   0.23170387
  0.19360000   0.22406659
  0.19360000   0.21668422
  0.19360000   0.20954794
  0.19360000   0.20264927
  0.19360000   0.19598006
  0.19360000   0.18953244
  0.19360000   0.18329886
  0.19380000   0.39025919
  0.19380000   0.37749200
  0.19380000   0.36515818
  0.19380000   0.35324146
  0.19380000   0.34172634
  0.19380000   0.33059804
  0.19380000   0.31984245
  0.19380000   0.30944608
  0.19380000   0.29939603
  0.19380000   0.28967996
  0.19380000   0.28028603
  0.19380000   0.27120291
  0.19380000   0.26241971
  0.19380000   0.25392601
  0.19380000   0.24571178
  0.19380000   0.23776739
  0.19380000   0.23008359
  0.19380000   0.22265147
  0.19380000   0.21546247
  0.19380000   0.20850835
  0.19380000   0.20178118
  0.19380000   0.19527331
  0.19380000   0.18897738
  0.19400000   0.39651120
  0.19400000   0.38379139
  0.19400000   0.37149584
  0.19400000   0.35960882
  0.19400000   0.34811534
  0.19400000   0.33700110
  0.19400000   0.32625245
  0.19400000   0.31585633
  0.19400000   0.30580026
  0.19400000   0.29607228
  0.19400000   0.28666093
  0.19400000   0.27755523
  0.19400000   0.26874464
  0.19400000   0.26021905
  0.19400000   0.25196874
  0.19400000   0.24398436
  0.19400000   0.23625695
  0.19400000   0.22877786
  0.19400000   0.22153878
  0.19400000   0.21453171
  0.19400000   0.20774893
  0.19400000   0.20118302
  0.19400000   0.19482683
  0.19420000   0.40285887
  0.19420000   0.39019123
  0.19420000   0.37793868
  0.19420000   0.36608601
  0.19420000   0.35461874
  0.19420000   0.34352303
  0.19420000   0.33278567
  0.19420000   0.32239405
  0.19420000   0.31233609
  0.19420000   0.30260021
  0.19420000   0.29317533
  0.19420000   0.28405082
  0.19420000   0.27521647
  0.19420000   0.26666248
  0.19420000   0.25837945
  0.19420000   0.25035832
  0.19420000   0.24259039
  0.19420000   0.23506728
  0.19420000   0.22778093
  0.19420000   0.22072357
  0.19420000   0.21388773
  0.19420000   0.20726618
  0.19420000   0.20085198
  0.19440000   0.40930346
  0.19440000   0.39669293
  0.19440000   0.38448824
  0.19440000   0.37267471
  0.19440000   0.36123833
  0.19440000   0.35016575
  0.19440000   0.33944420
  0.19440000   0.32906149
  0.19440000   0.31900592
  0.19440000   0.30926632
  0.19440000   0.29983196
  0.19440000   0.29069256
  0.19440000   0.28183825
  0.19440000   0.27325955
  0.19440000   0.26494734
  0.19440000   0.25689286
  0.19440000   0.24908768
  0.19440000   0.24152369
  0.19440000   0.23419306
  0.19440000   0.22708828
  0.19440000   0.22020209
  0.19440000   0.21352748
  0.19440000   0.20705772
  0.19460000   0.41584623
  0.19460000   0.40329787
  0.19460000   0.39114604
  0.19460000   0.37937657
  0.19460000   0.36797594
  0.19460000   0.35693124
  0.19460000   0.34623016
  0.19460000   0.33586090
  0.19460000   0.32581218
  0.19460000   0.31607320
  0.19460000   0.30663359
  0.19460000   0.29748341
  0.19460000   0.28861312
  0.19460000   0.28001355
  0.19460000   0.27167588
  0.19460000   0.26359165
  0.19460000   0.25575268
  0.19460000   0.24815112
  0.19460000   0.24077940
  0.19460000   0.23363025
  0.19460000   0.22669661
  0.19460000   0.21997171
  0.19460000   0.21344902
  0.19480000   0.42248848
  0.19480000   0.41000747
  0.19480000   0.39791362
  0.19480000   0.38619327
  0.19480000   0.37483337
  0.19480000   0.36382146
  0.19480000   0.35314566
  0.19480000   0.34279458
  0.19480000   0.33275733
  0.19480000   0.32302347
  0.19480000   0.31358301
  0.19480000   0.30442633
  0.19480000   0.29554422
  0.19480000   0.28692782
  0.19480000   0.27856861
  0.19480000   0.27045839
  0.19480000   0.26258928
  0.19480000   0.25495367
  0.19480000   0.24754425
  0.19480000   0.24035396
  0.19480000   0.23337599
  0.19480000   0.22660377
  0.19480000   0.22003097
  0.19500000   0.42923147
  0.19500000   0.41682313
  0.19500000   0.40479254
  0.19500000   0.39312651
  0.19500000   0.38181247
  0.19500000   0.37083841
  0.19500000   0.36019286
  0.19500000   0.34986484
  0.19500000   0.33984384
  0.19500000   0.33011980
  0.19500000   0.32068305
  0.19500000   0.31152434
  0.19500000   0.30263476
  0.19500000   0.29400575
  0.19500000   0.28562910
  0.19500000   0.27749687
  0.19500000   0.26960146
  0.19500000   0.26193552
  0.19500000   0.25449197
  0.19500000   0.24726399
  0.19500000   0.24024499
  0.19500000   0.23342863
  0.19500000   0.22680877
  0.19520000   0.43607650
  0.19520000   0.42374627
  0.19520000   0.41178433
  0.19520000   0.40017798
  0.19520000   0.38891509
  0.19520000   0.37798409
  0.19520000   0.36737393
  0.19520000   0.35707401
  0.19520000   0.34707423
  0.19520000   0.33736485
  0.19520000   0.32793658
  0.19520000   0.31878048
  0.19520000   0.30988796
  0.19520000   0.30125076
  0.19520000   0.29286096
  0.19520000   0.28471091
  0.19520000   0.27679325
  0.19520000   0.26910089
  0.19520000   0.26162700
  0.19520000   0.25436499
  0.19520000   0.24730850
  0.19520000   0.24045138
  0.19520000   0.23378771
  0.19540000   0.44302487
  0.19540000   0.43077832
  0.19540000   0.41889058
  0.19540000   0.40734939
  0.19540000   0.39614308
  0.19540000   0.38526052
  0.19540000   0.37469104
  0.19540000   0.36442445
  0.19540000   0.35445100
  0.19540000   0.34476134
  0.19540000   0.33534648
  0.19540000   0.32619783
  0.19540000   0.31730710
  0.19540000   0.30866633
  0.19540000   0.30026788
  0.19540000   0.29210438
  0.19540000   0.28416873
  0.19540000   0.27645409
  0.19540000   0.26895387
  0.19540000   0.26166170
  0.19540000   0.25457145
  0.19540000   0.24767719
  0.19540000   0.24097319
  0.19560000   0.45007786
  0.19560000   0.43792071
  0.19560000   0.42611284
  0.19560000   0.41464246
  0.19560000   0.40349832
  0.19560000   0.39266972
  0.19560000   0.38214639
  0.19560000   0.37191852
  0.19560000   0.36197672
  0.19560000   0.35231198
  0.19560000   0.34291567
  0.19560000   0.33377949
  0.19560000   0.32489548
  0.19560000   0.31625596
  0.19560000   0.30785357
  0.19560000   0.29968121
  0.19560000   0.29173204
  0.19560000   0.28399947
  0.19560000   0.27647714
  0.19560000   0.26915892
  0.19560000   0.26203889
  0.19560000   0.25511132
  0.19560000   0.24837069
  0.19580000   0.45723678
  0.19580000   0.44517488
  0.19580000   0.43345270
  0.19580000   0.42205891
  0.19580000   0.41098269
  0.19580000   0.40021374
  0.19580000   0.38974218
  0.19580000   0.37955859
  0.19580000   0.36965393
  0.19580000   0.36001953
  0.19580000   0.35064709
  0.19580000   0.34152861
  0.19580000   0.33265644
  0.19580000   0.32402320
  0.19580000   0.31562179
  0.19580000   0.30744538
  0.19580000   0.29948738
  0.19580000   0.29174145
  0.19580000   0.28420147
  0.19580000   0.27686153
  0.19580000   0.26971591
  0.19580000   0.26275912
  0.19580000   0.25598581
  0.19600000   0.46450293
  0.19600000   0.45254226
  0.19600000   0.44091174
  0.19600000   0.42960047
  0.19600000   0.41859807
  0.19600000   0.40789462
  0.19600000   0.39748065
  0.19600000   0.38734708
  0.19600000   0.37748522
  0.19600000   0.36788676
  0.19600000   0.35854369
  0.19600000   0.34944835
  0.19600000   0.34059336
  0.19600000   0.33197163
  0.19600000   0.32357633
  0.19600000   0.31540090
  0.19600000   0.30743900
  0.19600000   0.29968452
  0.19600000   0.29213157
  0.19600000   0.28477447
  0.19600000   0.27760772
  0.19600000   0.27062602
  0.19600000   0.26382423
  0.19620000   0.47187762
  0.19620000   0.46002429
  0.19620000   0.44849153
  0.19620000   0.43726887
  0.19620000   0.42634635
  0.19620000   0.41571443
  0.19620000   0.40536401
  0.19620000   0.39528638
  0.19620000   0.38547319
  0.19620000   0.37591645
  0.19620000   0.36660847
  0.19620000   0.35754190
  0.19620000   0.34870963
  0.19620000   0.34010487
  0.19620000   0.33172104
  0.19620000   0.32355184
  0.19620000   0.31559119
  0.19620000   0.30783320
  0.19620000   0.30027221
  0.19620000   0.29290276
  0.19620000   0.28571957
  0.19620000   0.27871754
  0.19620000   0.27189172
  0.19640000   0.47936214
  0.19640000   0.46762242
  0.19640000   0.45619367
  0.19640000   0.44506587
  0.19640000   0.43422943
  0.19640000   0.42367523
  0.19640000   0.41339451
  0.19640000   0.40337891
  0.19640000   0.39362044
  0.19640000   0.38411140
  0.19640000   0.37484443
  0.19640000   0.36581246
  0.19640000   0.35700868
  0.19640000   0.34842655
  0.19640000   0.34005979
  0.19640000   0.33190231
  0.19640000   0.32394828
  0.19640000   0.31619207
  0.19640000   0.30862822
  0.19640000   0.30125149
  0.19640000   0.29405681
  0.19640000   0.28703927
  0.19640000   0.28019413
  0.19660000   0.48695782
  0.19660000   0.47533808
  0.19660000   0.46401975
  0.19660000   0.45299319
  0.19660000   0.44224922
  0.19660000   0.43177908
  0.19660000   0.42157438
  0.19660000   0.41162711
  0.19660000   0.40192958
  0.19660000   0.39247443
  0.19660000   0.38325458
  0.19660000   0.37426327
  0.19660000   0.36549395
  0.19660000   0.35694037
  0.19660000   0.34859647
  0.19660000   0.34045644
  0.19660000   0.33251467
  0.19660000   0.32476575
  0.19660000   0.31720447
  0.19660000   0.30982579
  0.19660000   0.30262483
  0.19660000   0.29559689
  0.19660000   0.28873742
  0.19680000   0.49466594
  0.19680000   0.48317272
  0.19680000   0.47197134
  0.19680000   0.46105257
  0.19680000   0.45040761
  0.19680000   0.44002806
  0.19680000   0.42990588
  0.19680000   0.42003340
  0.19680000   0.41040324
  0.19680000   0.40100835
  0.19680000   0.39184197
  0.19680000   0.38289757
  0.19680000   0.37416892
  0.19680000   0.36564999
  0.19680000   0.35733501
  0.19680000   0.34921839
  0.19680000   0.34129476
  0.19680000   0.33355893
  0.19680000   0.32600591
  0.19680000   0.31863085
  0.19680000   0.31142910
  0.19680000   0.30439613
  0.19680000   0.29752758
  0.19700000   0.50248782
  0.19700000   0.49112778
  0.19700000   0.48005004
  0.19700000   0.46924576
  0.19700000   0.45870651
  0.19700000   0.44842424
  0.19700000   0.43839126
  0.19700000   0.42860022
  0.19700000   0.41904406
  0.19700000   0.40971602
  0.19700000   0.40060962
  0.19700000   0.39171862
  0.19700000   0.38303705
  0.19700000   0.37455915
  0.19700000   0.36627937
  0.19700000   0.35819237
  0.19700000   0.35029300
  0.19700000   0.34257630
  0.19700000   0.33503748
  0.19700000   0.32767191
  0.19700000   0.32047512
  0.19700000   0.31344278
  0.19700000   0.30657072
  0.19720000   0.51042474
  0.19720000   0.49920469
  0.19720000   0.48825743
  0.19720000   0.47757449
  0.19720000   0.46714781
  0.19720000   0.45696969
  0.19720000   0.44703277
  0.19720000   0.43733001
  0.19720000   0.42785466
  0.19720000   0.41860025
  0.19720000   0.40956058
  0.19720000   0.40072969
  0.19720000   0.39210186
  0.19720000   0.38367156
  0.19720000   0.37543351
  0.19720000   0.36738259
  0.19720000   0.35951387
  0.19720000   0.35182261
  0.19720000   0.34430421
  0.19720000   0.33695426
  0.19720000   0.32976847
  0.19720000   0.32274271
  0.19720000   0.31587297
  0.19740000   0.51847800
  0.19740000   0.50740489
  0.19740000   0.49659509
  0.19740000   0.48604050
  0.19740000   0.47573342
  0.19740000   0.46566648
  0.19740000   0.45583265
  0.19740000   0.44622520
  0.19740000   0.43683767
  0.19740000   0.42766388
  0.19740000   0.41869791
  0.19740000   0.40993405
  0.19740000   0.40136682
  0.19740000   0.39299097
  0.19740000   0.38480142
  0.19740000   0.37679329
  0.19740000   0.36896186
  0.19740000   0.36130260
  0.19740000   0.35381113
  0.19740000   0.34648321
  0.19740000   0.33931476
  0.19740000   0.33230181
  0.19740000   0.32544054
  0.19760000   0.52664889
  0.19760000   0.51572980
  0.19760000   0.50506458
  0.19760000   0.49464550
  0.19760000   0.48446521
  0.19760000   0.47451666
  0.19760000   0.46479315
  0.19760000   0.45528822
  0.19760000   0.44599573
  0.19760000   0.43690976
  0.19760000   0.42802465
  0.19760000   0.41933496
  0.19760000   0.41083546
  0.19760000   0.40252111
  0.19760000   0.39438708
  0.19760000   0.38642871
  0.19760000   0.37864148
  0.19760000   0.37102108
  0.19760000   0.36356330
  0.19760000   0.35626412
  0.19760000   0.34911961
  0.19760000   0.34212602
  0.19760000   0.33527967
  0.19780000   0.53493869
  0.19780000   0.52418083
  0.19780000   0.51366746
  0.19780000   0.50339122
  0.19780000   0.49334507
  0.19780000   0.48352230
  0.19780000   0.47391649
  0.19780000   0.46452149
  0.19780000   0.45533144
  0.19780000   0.44634070
  0.19780000   0.43754385
  0.19780000   0.42893570
  0.19780000   0.42051126
  0.19780000   0.41226573
  0.19780000   0.40419449
  0.19780000   0.39629310
  0.19780000   0.38855725
  0.19780000   0.38098281
  0.19780000   0.37356579
  0.19780000   0.36630233
  0.19780000   0.35918870
  0.19780000   0.35222131
  0.19780000   0.34539665
  0.19800000   0.54334866
  0.19800000   0.53275939
  0.19800000   0.52240530
  0.19800000   0.51227936
  0.19800000   0.50237487
  0.19800000   0.49268542
  0.19800000   0.48320489
  0.19800000   0.47392743
  0.19800000   0.46484743
  0.19800000   0.45595951
  0.19800000   0.44725852
  0.19800000   0.43873951
  0.19800000   0.43039771
  0.19800000   0.42222856
  0.19800000   0.41422763
  0.19800000   0.40639070
  0.19800000   0.39871367
  0.19800000   0.39119260
  0.19800000   0.38382368
  0.19800000   0.37660323
  0.19800000   0.36952771
  0.19800000   0.36259367
  0.19800000   0.35579779
  0.19820000   0.55188006
  0.19820000   0.54146688
  0.19820000   0.53127962
  0.19820000   0.52131161
  0.19820000   0.51155645
  0.19820000   0.50200805
  0.19820000   0.49266056
  0.19820000   0.48350841
  0.19820000   0.47454627
  0.19820000   0.46576900
  0.19820000   0.45717169
  0.19820000   0.44874964
  0.19820000   0.44049829
  0.19820000   0.43241330
  0.19820000   0.42449047
  0.19820000   0.41672576
  0.19820000   0.40911526
  0.19820000   0.40165523
  0.19820000   0.39434204
  0.19820000   0.38717219
  0.19820000   0.38014230
  0.19820000   0.37324909
  0.19820000   0.36648940
  0.19840000   0.56053415
  0.19840000   0.55030467
  0.19840000   0.54029196
  0.19840000   0.53048965
  0.19840000   0.52089166
  0.19840000   0.51149219
  0.19840000   0.50228568
  0.19840000   0.49326682
  0.19840000   0.48443053
  0.19840000   0.47577193
  0.19840000   0.46728635
  0.19840000   0.45896929
  0.19840000   0.45081645
  0.19840000   0.44282367
  0.19840000   0.43498696
  0.19840000   0.42730247
  0.19840000   0.41976650
  0.19840000   0.41237547
  0.19840000   0.40512594
  0.19840000   0.39801457
  0.19840000   0.39103815
  0.19840000   0.38419356
  0.19840000   0.37747780
  0.19860000   0.56931215
  0.19860000   0.55927413
  0.19860000   0.54944381
  0.19860000   0.53981513
  0.19860000   0.53038231
  0.19860000   0.52113983
  0.19860000   0.51208241
  0.19860000   0.50320499
  0.19860000   0.49450276
  0.19860000   0.48597106
  0.19860000   0.47760545
  0.19860000   0.46940167
  0.19860000   0.46135560
  0.19860000   0.45346332
  0.19860000   0.44572101
  0.19860000   0.43812502
  0.19860000   0.43067184
  0.19860000   0.42335805
  0.19860000   0.41618040
  0.19860000   0.40913570
  0.19860000   0.40222090
  0.19860000   0.39543304
  0.19860000   0.38876928
  0.19880000   0.57821528
  0.19880000   0.56837661
  0.19880000   0.55873666
  0.19880000   0.54928969
  0.19880000   0.54003019
  0.19880000   0.53095292
  0.19880000   0.52205288
  0.19880000   0.51332525
  0.19880000   0.50476546
  0.19880000   0.49636909
  0.19880000   0.48813192
  0.19880000   0.48004991
  0.19880000   0.47211914
  0.19880000   0.46433587
  0.19880000   0.45669650
  0.19880000   0.44919755
  0.19880000   0.44183569
  0.19880000   0.43460768
  0.19880000   0.42751040
  0.19880000   0.42054086
  0.19880000   0.41369616
  0.19880000   0.40697347
  0.19880000   0.40037010
  0.19900000   0.58724473
  0.19900000   0.57761343
  0.19900000   0.56817198
  0.19900000   0.55891493
  0.19900000   0.54983705
  0.19900000   0.54093339
  0.19900000   0.53219918
  0.19900000   0.52362987
  0.19900000   0.51522110
  0.19900000   0.50696870
  0.19900000   0.49886865
  0.19900000   0.49091711
  0.19900000   0.48311038
  0.19900000   0.47544490
  0.19900000   0.46791726
  0.19900000   0.46052415
  0.19900000   0.45326241
  0.19900000   0.44612898
  0.19900000   0.43912089
  0.19900000   0.43223531
  0.19900000   0.42546947
  0.19900000   0.41882072
  0.19900000   0.41228648
  0.19920000   0.59640168
  0.19920000   0.58698590
  0.19920000   0.57775120
  0.19920000   0.56869243
  0.19920000   0.55980464
  0.19920000   0.55108313
  0.19920000   0.54252338
  0.19920000   0.53412109
  0.19920000   0.52587212
  0.19920000   0.51777251
  0.19920000   0.50981846
  0.19920000   0.50200633
  0.19920000   0.49433261
  0.19920000   0.48679393
  0.19920000   0.47938705
  0.19920000   0.47210884
  0.19920000   0.46495630
  0.19920000   0.45792653
  0.19920000   0.45101672
  0.19920000   0.44422419
  0.19920000   0.43754631
  0.19920000   0.43098057
  0.19920000   0.42452453
  0.19940000   0.60568730
  0.19940000   0.59649528
  0.19940000   0.58747573
  0.19940000   0.57862374
  0.19940000   0.56993464
  0.19940000   0.56140398
  0.19940000   0.55302750
  0.19940000   0.54480110
  0.19940000   0.53672088
  0.19940000   0.52878309
  0.19940000   0.52098413
  0.19940000   0.51332056
  0.19940000   0.50578904
  0.19940000   0.49838640
  0.19940000   0.49110955
  0.19940000   0.48395556
  0.19940000   0.47692156
  0.19940000   0.47000481
  0.19940000   0.46320267
  0.19940000   0.45651257
  0.19940000   0.44993205
  0.19940000   0.44345872
  0.19940000   0.43709028
  0.19960000   0.61510269
  0.19960000   0.60614284
  0.19960000   0.59734694
  0.19960000   0.58871036
  0.19960000   0.58022871
  0.19960000   0.57189776
  0.19960000   0.56371349
  0.19960000   0.55567204
  0.19960000   0.54776970
  0.19960000   0.54000294
  0.19960000   0.53236836
  0.19960000   0.52486269
  0.19960000   0.51748280
  0.19960000   0.51022566
  0.19960000   0.50308837
  0.19960000   0.49606815
  0.19960000   0.48916229
  0.19960000   0.48236820
  0.19960000   0.47568338
  0.19960000   0.46910541
  0.19960000   0.46263196
  0.19960000   0.45626076
  0.19960000   0.44998964
  0.19980000   0.62464897
  0.19980000   0.61592978
  0.19980000   0.60736617
  0.19980000   0.59895378
  0.19980000   0.59068845
  0.19980000   0.58256622
  0.19980000   0.57458328
  0.19980000   0.56673598
  0.19980000   0.55902083
  0.19980000   0.55143450
  0.19980000   0.54397378
  0.19980000   0.53663557
  0.19980000   0.52941692
  0.19980000   0.52231498
  0.19980000   0.51532700
  0.19980000   0.50845035
  0.19980000   0.50168249
  0.19980000   0.49502096
  0.19980000   0.48846340
  0.19980000   0.48200753
  0.19980000   0.47565114
  0.19980000   0.46939210
  0.19980000   0.46322835
  0.20000000   0.63432721
  0.20000000   0.62585729
  0.20000000   0.61753472
  0.20000000   0.60935540
  0.20000000   0.60131543
  0.20000000   0.59341106
  0.20000000   0.58563870
  0.20000000   0.57799493
  0.20000000   0.57047645
  0.20000000   0.56308012
  0.20000000   0.55580291
  0.20000000   0.54864191
  0.20000000   0.54159434
  0.20000000   0.53465750
  0.20000000   0.52782881
  0.20000000   0.52110578
  0.20000000   0.51448602
  0.20000000   0.50796720
  0.20000000   0.50154711
  0.20000000   0.49522359
  0.20000000   0.48899455
  0.20000000   0.48285799
  0.20000000   0.47681198
  0.20020000   0.64413844
  0.20020000   0.63592650
  0.20020000   0.62785384
  0.20020000   0.61991662
  0.20020000   0.61211115
  0.20020000   0.60443391
  0.20020000   0.59688154
  0.20020000   0.58945081
  0.20020000   0.58213864
  0.20020000   0.57494205
  0.20020000   0.56785820
  0.20020000   0.56088435
  0.20020000   0.55401788
  0.20020000   0.54725625
  0.20020000   0.54059704
  0.20020000   0.53403790
  0.20020000   0.52757656
  0.20020000   0.52121087
  0.20020000   0.51493870
  0.20020000   0.50875804
  0.20020000   0.50266693
  0.20020000   0.49666348
  0.20020000   0.49074586
  0.20040000   0.65408366
  0.20040000   0.64613853
  0.20040000   0.63832475
  0.20040000   0.63063874
  0.20040000   0.62307703
  0.20040000   0.61563634
  0.20040000   0.60831350
  0.20040000   0.60110548
  0.20040000   0.59400939
  0.20040000   0.58702244
  0.20040000   0.58014196
  0.20040000   0.57336537
  0.20040000   0.56669021
  0.20040000   0.56011411
  0.20040000   0.55363477
  0.20040000   0.54724999
  0.20040000   0.54095765
  0.20040000   0.53475570
  0.20040000   0.52864217
  0.20040000   0.52261515
  0.20040000   0.51667281
  0.20040000   0.51081335
  0.20040000   0.50503507
  0.20060000   0.66416384
  0.20060000   0.65649441
  0.20060000   0.64894860
  0.20060000   0.64152302
  0.20060000   0.63421447
  0.20060000   0.62701984
  0.20060000   0.61993619
  0.20060000   0.61296069
  0.20060000   0.60609061
  0.20060000   0.59932334
  0.20060000   0.59265639
  0.20060000   0.58608734
  0.20060000   0.57961388
  0.20060000   0.57323378
  0.20060000   0.56694489
  0.20060000   0.56074516
  0.20060000   0.55463258
  0.20060000   0.54860524
  0.20060000   0.54266129
  0.20060000   0.53679892
  0.20060000   0.53101643
  0.20060000   0.52531213
  0.20060000   0.51968441
  0.20080000   0.67437988
  0.20080000   0.66699516
  0.20080000   0.65972647
  0.20080000   0.65257067
  0.20080000   0.64552475
  0.20080000   0.63858582
  0.20080000   0.63175115
  0.20080000   0.62501807
  0.20080000   0.61838405
  0.20080000   0.61184665
  0.20080000   0.60540354
  0.20080000   0.59905245
  0.20080000   0.59279123
  0.20080000   0.58661780
  0.20080000   0.58053013
  0.20080000   0.57452630
  0.20080000   0.56860445
  0.20080000   0.56276278
  0.20080000   0.55699954
  0.20080000   0.55131307
  0.20080000   0.54570175
  0.20080000   0.54016400
  0.20080000   0.53469832
  0.20100000   0.68473266
  0.20100000   0.67764173
  0.20100000   0.67065941
  0.20100000   0.66378280
  0.20100000   0.65700908
  0.20100000   0.65033560
  0.20100000   0.64375978
  0.20100000   0.63727916
  0.20100000   0.63089137
  0.20100000   0.62459415
  0.20100000   0.61838531
  0.20100000   0.61226275
  0.20100000   0.60622446
  0.20100000   0.60026849
  0.20100000   0.59439296
  0.20100000   0.58859607
  0.20100000   0.58287608
  0.20100000   0.57723131
  0.20100000   0.57166014
  0.20100000   0.56616099
  0.20100000   0.56073237
  0.20100000   0.55537279
  0.20100000   0.55008085
  0.20120000   0.69522299
  0.20120000   0.68843500
  0.20120000   0.68174838
  0.20120000   0.67516045
  0.20120000   0.66866861
  0.20120000   0.66227038
  0.20120000   0.65596339
  0.20120000   0.64974535
  0.20120000   0.64361407
  0.20120000   0.63756743
  0.20120000   0.63160342
  0.20120000   0.62572007
  0.20120000   0.61991552
  0.20120000   0.61418795
  0.20120000   0.60853562
  0.20120000   0.60295684
  0.20120000   0.59745001
  0.20120000   0.59201354
  0.20120000   0.58664593
  0.20120000   0.58134573
  0.20120000   0.57611151
  0.20120000   0.57094192
  0.20120000   0.56583563
  0.20140000   0.70585164
  0.20140000   0.69937579
  0.20140000   0.69299427
  0.20140000   0.68670459
  0.20140000   0.68050435
  0.20140000   0.67439128
  0.20140000   0.66836318
  0.20140000   0.66241793
  0.20140000   0.65655350
  0.20140000   0.65076796
  0.20140000   0.64505941
  0.20140000   0.63942606
  0.20140000   0.63386616
  0.20140000   0.62837803
  0.20140000   0.62296007
  0.20140000   0.61761070
  0.20140000   0.61232843
  0.20140000   0.60711180
  0.20140000   0.60195941
  0.20140000   0.59686990
  0.20140000   0.59184196
  0.20140000   0.58687433
  0.20140000   0.58196576
  0.20160000   0.71661932
  0.20160000   0.71046488
  0.20160000   0.70439789
  0.20160000   0.69841607
  0.20160000   0.69251724
  0.20160000   0.68669928
  0.20160000   0.68096017
  0.20160000   0.67529799
  0.20160000   0.66971085
  0.20160000   0.66419697
  0.20160000   0.65875461
  0.20160000   0.65338211
  0.20160000   0.64807785
  0.20160000   0.64284031
  0.20160000   0.63766797
  0.20160000   0.63255940
  0.20160000   0.62751321
  0.20160000   0.62252806
  0.20160000   0.61760264
  0.20160000   0.61273570
  0.20160000   0.60792603
  0.20160000   0.60317244
  0.20160000   0.59847381
  0.20180000   0.72752665
  0.20180000   0.72170293
  0.20180000   0.71595996
  0.20180000   0.71029568
  0.20180000   0.70470807
  0.20180000   0.69919523
  0.20180000   0.69375529
  0.20180000   0.68838649
  0.20180000   0.68308711
  0.20180000   0.67785551
  0.20180000   0.67269011
  0.20180000   0.66758937
  0.20180000   0.66255182
  0.20180000   0.65757604
  0.20180000   0.65266065
  0.20180000   0.64780434
  0.20180000   0.64300581
  0.20180000   0.63826384
  0.20180000   0.63357722
  0.20180000   0.62894480
  0.20180000   0.62436546
  0.20180000   0.61983811
  0.20180000   0.61536171
  0.20200000   0.73857422
  0.20200000   0.73309055
  0.20200000   0.72768112
  0.20200000   0.72234406
  0.20200000   0.71707755
  0.20200000   0.71187984
  0.20200000   0.70674926
  0.20200000   0.70168419
  0.20200000   0.69668308
  0.20200000   0.69174442
  0.20200000   0.68686677
  0.20200000   0.68204873
  0.20200000   0.67728896
  0.20200000   0.67258616
  0.20200000   0.66793907
  0.20200000   0.66334649
  0.20200000   0.65880724
  0.20200000   0.65432018
  0.20200000   0.64988423
  0.20200000   0.64549831
  0.20200000   0.64116141
  0.20200000   0.63687253
  0.20200000   0.63263069
  0.20220000   0.74976251
  0.20220000   0.74462824
  0.20220000   0.73956189
  0.20220000   0.73456176
  0.20220000   0.72962622
  0.20220000   0.72475369
  0.20220000   0.71994266
  0.20220000   0.71519168
  0.20220000   0.71049933
  0.20220000   0.70586425
  0.20220000   0.70128515
  0.20220000   0.69676075
  0.20220000   0.69228984
  0.20220000   0.68787123
  0.20220000   0.68350379
  0.20220000   0.67918641
  0.20220000   0.67491804
  0.20220000   0.67069763
  0.20220000   0.66652419
  0.20220000   0.66239675
  0.20220000   0.65831438
  0.20220000   0.65427617
  0.20220000   0.65028124
  0.20240000   0.76109195
  0.20240000   0.75631644
  0.20240000   0.75160270
  0.20240000   0.74694920
  0.20240000   0.74235449
  0.20240000   0.73781717
  0.20240000   0.73333588
  0.20240000   0.72890931
  0.20240000   0.72453620
  0.20240000   0.72021534
  0.20240000   0.71594555
  0.20240000   0.71172569
  0.20240000   0.70755466
  0.20240000   0.70343142
  0.20240000   0.69935492
  0.20240000   0.69532417
  0.20240000   0.69133822
  0.20240000   0.68739612
  0.20240000   0.68349699
  0.20240000   0.67963994
  0.20240000   0.67582413
  0.20240000   0.67204874
  0.20240000   0.66831296
  0.20260000   0.77256287
  0.20260000   0.76815547
  0.20260000   0.76380384
  0.20260000   0.75950666
  0.20260000   0.75526262
  0.20260000   0.75107050
  0.20260000   0.74692908
  0.20260000   0.74283722
  0.20260000   0.73879378
  0.20260000   0.73479769
  0.20260000   0.73084791
  0.20260000   0.72694342
  0.20260000   0.72308325
  0.20260000   0.71926644
  0.20260000   0.71549208
  0.20260000   0.71175929
  0.20260000   0.70806721
  0.20260000   0.70441499
  0.20260000   0.70080184
  0.20260000   0.69722697
  0.20260000   0.69368962
  0.20260000   0.69018904
  0.20260000   0.68672454
  0.20280000   0.78417550
  0.20280000   0.78014552
  0.20280000   0.77616550
  0.20280000   0.77223427
  0.20280000   0.76835070
  0.20280000   0.76451371
  0.20280000   0.76072224
  0.20280000   0.75697529
  0.20280000   0.75327187
  0.20280000   0.74961103
  0.20280000   0.74599185
  0.20280000   0.74241345
  0.20280000   0.73887496
  0.20280000   0.73537555
  0.20280000   0.73191441
  0.20280000   0.72849075
  0.20280000   0.72510382
  0.20280000   0.72175287
  0.20280000   0.71843720
  0.20280000   0.71515610
  0.20280000   0.71190891
  0.20280000   0.70869496
  0.20280000   0.70551363
  0.20300000   0.79592999
  0.20300000   0.79228671
  0.20300000   0.78868772
  0.20300000   0.78513201
  0.20300000   0.78161862
  0.20300000   0.77814661
  0.20300000   0.77471508
  0.20300000   0.77132315
  0.20300000   0.76796997
  0.20300000   0.76465472
  0.20300000   0.76137661
  0.20300000   0.75813486
  0.20300000   0.75492873
  0.20300000   0.75175748
  0.20300000   0.74862043
  0.20300000   0.74551687
  0.20300000   0.74244616
  0.20300000   0.73940765
  0.20300000   0.73640070
  0.20300000   0.73342473
  0.20300000   0.73047912
  0.20300000   0.72756332
  0.20300000   0.72467676
  0.20320000   0.80782638
  0.20320000   0.80457901
  0.20320000   0.80137040
  0.20320000   0.79819971
  0.20320000   0.79506611
  0.20320000   0.79196883
  0.20320000   0.78890708
  0.20320000   0.78588013
  0.20320000   0.78288727
  0.20320000   0.77992778
  0.20320000   0.77700100
  0.20320000   0.77410627
  0.20320000   0.77124295
  0.20320000   0.76841041
  0.20320000   0.76560807
  0.20320000   0.76283532
  0.20320000   0.76009162
  0.20320000   0.75737639
  0.20320000   0.75468911
  0.20320000   0.75202926
  0.20320000   0.74939632
  0.20320000   0.74678980
  0.20320000   0.74420922
  0.20340000   0.81986460
  0.20340000   0.81702227
  0.20340000   0.81421330
  0.20340000   0.81143699
  0.20340000   0.80869268
  0.20340000   0.80597971
  0.20340000   0.80329744
  0.20340000   0.80064527
  0.20340000   0.79802259
  0.20340000   0.79542883
  0.20340000   0.79286342
  0.20340000   0.79032582
  0.20340000   0.78781549
  0.20340000   0.78533191
  0.20340000   0.78287459
  0.20340000   0.78044302
  0.20340000   0.77803675
  0.20340000   0.77565530
  0.20340000   0.77329822
  0.20340000   0.77096507
  0.20340000   0.76865543
  0.20340000   0.76636887
  0.20340000   0.76410500
  0.20360000   0.83204446
  0.20360000   0.82961618
  0.20360000   0.82721598
  0.20360000   0.82484330
  0.20360000   0.82249760
  0.20360000   0.82017836
  0.20360000   0.81788508
  0.20360000   0.81561725
  0.20360000   0.81337440
  0.20360000   0.81115606
  0.20360000   0.80896178
  0.20360000   0.80679110
  0.20360000   0.80464362
  0.20360000   0.80251889
  0.20360000   0.80041652
  0.20360000   0.79833611
  0.20360000   0.79627726
  0.20360000   0.79423960
  0.20360000   0.79222277
  0.20360000   0.79022640
  0.20360000   0.78825014
  0.20360000   0.78629365
  0.20360000   0.78435660
  0.20380000   0.84436563
  0.20380000   0.84236030
  0.20380000   0.84037786
  0.20380000   0.83841787
  0.20380000   0.83647993
  0.20380000   0.83456363
  0.20380000   0.83266859
  0.20380000   0.83079441
  0.20380000   0.82894074
  0.20380000   0.82710721
  0.20380000   0.82529347
  0.20380000   0.82349917
  0.20380000   0.82172398
  0.20380000   0.81996758
  0.20380000   0.81822963
  0.20380000   0.81650984
  0.20380000   0.81480791
  0.20380000   0.81312352
  0.20380000   0.81145640
  0.20380000   0.80980625
  0.20380000   0.80817282
  0.20380000   0.80655582
  0.20380000   0.80495499
  0.20400000   0.85682767
  0.20400000   0.85525404
  0.20400000   0.85369816
  0.20400000   0.85215973
  0.20400000   0.85063846
  0.20400000   0.84913406
  0.20400000   0.84764624
  0.20400000   0.84617473
  0.20400000   0.84471925
  0.20400000   0.84327955
  0.20400000   0.84185536
  0.20400000   0.84044644
  0.20400000   0.83905255
  0.20400000   0.83767343
  0.20400000   0.83630886
  0.20400000   0.83495860
  0.20400000   0.83362244
  0.20400000   0.83230015
  0.20400000   0.83099152
  0.20400000   0.82969634
  0.20400000   0.82841440
  0.20400000   0.82714551
  0.20400000   0.82588946
  0.20420000   0.86942999
  0.20420000   0.86829660
  0.20420000   0.86717590
  0.20420000   0.86606767
  0.20420000   0.86497173
  0.20420000   0.86388788
  0.20420000   0.86281595
  0.20420000   0.86175574
  0.20420000   0.86070709
  0.20420000   0.85966981
  0.20420000   0.85864374
  0.20420000   0.85762870
  0.20420000   0.85662455
  0.20420000   0.85563111
  0.20420000   0.85464823
  0.20420000   0.85367575
  0.20420000   0.85271354
  0.20420000   0.85176142
  0.20420000   0.85081928
  0.20420000   0.84988695
  0.20420000   0.84896430
  0.20420000   0.84805120
  0.20420000   0.84714751
  0.20440000   0.88217183
  0.20440000   0.88148705
  0.20440000   0.88080988
  0.20440000   0.88014022
  0.20440000   0.87947796
  0.20440000   0.87882300
  0.20440000   0.87817524
  0.20440000   0.87753458
  0.20440000   0.87690092
  0.20440000   0.87627417
  0.20440000   0.87565424
  0.20440000   0.87504103
  0.20440000   0.87443445
  0.20440000   0.87383441
  0.20440000   0.87324084
  0.20440000   0.87265363
  0.20440000   0.87207271
  0.20440000   0.87149800
  0.20440000   0.87092941
  0.20440000   0.87036686
  0.20440000   0.86981028
  0.20440000   0.86925959
  0.20440000   0.86871471
  0.20460000   0.89505229
  0.20460000   0.89482423
  0.20460000   0.89459869
  0.20460000   0.89437566
  0.20460000   0.89415509
  0.20460000   0.89393696
  0.20460000   0.89372124
  0.20460000   0.89350790
  0.20460000   0.89329691
  0.20460000   0.89308824
  0.20460000   0.89288186
  0.20460000   0.89267775
  0.20460000   0.89247588
  0.20460000   0.89227622
  0.20460000   0.89207875
  0.20460000   0.89188344
  0.20460000   0.89169026
  0.20460000   0.89149919
  0.20460000   0.89131021
  0.20460000   0.89112328
  0.20460000   0.89093840
  0.20460000   0.89075552
  0.20460000   0.89057463
  0.20480000   0.90807030
  0.20480000   0.90830679
  0.20480000   0.90854068
  0.20480000   0.90877198
  0.20480000   0.90900073
  0.20480000   0.90922695
  0.20480000   0.90945065
  0.20480000   0.90967187
  0.20480000   0.90989064
  0.20480000   0.91010697
  0.20480000   0.91032089
  0.20480000   0.91053243
  0.20480000   0.91074160
  0.20480000   0.91094844
  0.20480000   0.91115296
  0.20480000   0.91135520
  0.20480000   0.91155517
  0.20480000   0.91175289
  0.20480000   0.91194840
  0.20480000   0.91214171
  0.20480000   0.91233284
  0.20480000   0.91252183
  0.20480000   0.91270868
  0.20500000   0.92122459
  0.20500000   0.92193318
  0.20500000   0.92263393
  0.20500000   0.92332690
  0.20500000   0.92401214
  0.20500000   0.92468972
  0.20500000   0.92535971
  0.20500000   0.92602215
  0.20500000   0.92667712
  0.20500000   0.92732466
  0.20500000   0.92796486
  0.20500000   0.92859776
  0.20500000   0.92922344
  0.20500000   0.92984194
  0.20500000   0.93045333
  0.20500000   0.93105768
  0.20500000   0.93165505
  0.20500000   0.93224549
  0.20500000   0.93282908
  0.20500000   0.93340586
  0.20500000   0.93397591
  0.20500000   0.93453928
  0.20500000   0.93509603
  0.20520000   0.93451371
  0.20520000   0.93570160
  0.20520000   0.93687626
  0.20520000   0.93803778
  0.20520000   0.93918622
  0.20520000   0.94032165
  0.20520000   0.94144416
  0.20520000   0.94255382
  0.20520000   0.94365071
  0.20520000   0.94473492
  0.20520000   0.94580651
  0.20520000   0.94686558
  0.20520000   0.94791222
  0.20520000   0.94894650
  0.20520000   0.94996850
  0.20520000   0.95097833
  0.20520000   0.95197607
  0.20520000   0.95296179
  0.20520000   0.95393561
  0.20520000   0.95489759
  0.20520000   0.95584785
  0.20520000   0.95678646
  0.20520000   0.95771352
  0.20540000   0.94793601
  0.20540000   0.94961001
  0.20540000   0.95126522
  0.20540000   0.95290168
  0.20540000   0.95451946
  0.20540000   0.95611863
  0.20540000   0.95769925
  0.20540000   0.95926140
  0.20540000   0.96080514
  0.20540000   0.96233057
  0.20540000   0.96383775
  0.20540000   0.96532678
  0.20540000   0.96679775
  0.20540000   0.96825074
  0.20540000   0.96968586
  0.20540000   0.97110320
  0.20540000   0.97250286
  0.20540000   0.97388495
  0.20540000   0.97524957
  0.20540000   0.97659683
  0.20540000   0.97792684
  0.20540000   0.97923971
  0.20540000   0.98053557
  0.20560000   0.96148962
  0.20560000   0.96365613
  0.20560000   0.96579802
  0.20560000   0.96791530
  0.20560000   0.97000798
  0.20560000   0.97207610
  0.20560000   0.97411969
  0.20560000   0.97613878
  0.20560000   0.97813342
  0.20560000   0.98010368
  0.20560000   0.98204960
  0.20560000   0.98397127
  0.20560000   0.98586874
  0.20560000   0.98774211
  0.20560000   0.98959147
  0.20560000   0.99141690
  0.20560000   0.99321851
  0.20560000   0.99499640
  0.20560000   0.99675068
  0.20560000   0.99848147
  0.20560000   1.00018889
  0.20560000   1.00187307
  0.20560000   1.00353414
  0.20580000   0.97517246
  0.20580000   0.97783741
  0.20580000   0.98047160
  0.20580000   0.98307496
  0.20580000   0.98564744
  0.20580000   0.98818900
  0.20580000   0.99069959
  0.20580000   0.99317920
  0.20580000   0.99562783
  0.20580000   0.99804548
  0.20580000   1.00043217
  0.20580000   1.00278792
  0.20580000   1.00511277
  0.20580000   1.00740678
  0.20580000   1.00967001
  0.20580000   1.01190253
  0.20580000   1.01410443
  0.20580000   1.01627579
  0.20580000   1.01841673
  0.20580000   1.02052736
  0.20580000   1.02260780
  0.20580000   1.02465819
  0.20580000   1.02667866
  0.20600000   0.98898218
  0.20600000   0.99215099
  0.20600000   0.99528253
  0.20600000   0.99837661
  0.20600000   1.00143306
  0.20600000   1.00445173
  0.20600000   1.00743249
  0.20600000   1.01037524
  0.20600000   1.01327989
  0.20600000   1.01614635
  0.20600000   1.01897458
  0.20600000   1.02176454
  0.20600000   1.02451622
  0.20600000   1.02722961
  0.20600000   1.02990474
  0.20600000   1.03254164
  0.20600000   1.03514036
  0.20600000   1.03770098
  0.20600000   1.04022358
  0.20600000   1.04270826
  0.20600000   1.04515515
  0.20600000   1.04756437
  0.20600000   1.04993608
  0.20620000   1.00291620
  0.20620000   1.00659375
  0.20620000   1.01022705
  0.20620000   1.01381576
  0.20620000   1.01735956
  0.20620000   1.02085816
  0.20620000   1.02431130
  0.20620000   1.02771874
  0.20620000   1.03108029
  0.20620000   1.03439575
  0.20620000   1.03766497
  0.20620000   1.04088784
  0.20620000   1.04406425
  0.20620000   1.04719414
  0.20620000   1.05027745
  0.20620000   1.05331418
  0.20620000   1.05630434
  0.20620000   1.05924795
  0.20620000   1.06214508
  0.20620000   1.06499581
  0.20620000   1.06780026
  0.20620000   1.07055855
  0.20620000   1.07327084
  0.20640000   1.01697168
  0.20640000   1.02116222
  0.20640000   1.02530100
  0.20640000   1.02938750
  0.20640000   1.03342118
  0.20640000   1.03740157
  0.20640000   1.04132825
  0.20640000   1.04520082
  0.20640000   1.04901890
  0.20640000   1.05278220
  0.20640000   1.05649043
  0.20640000   1.06014335
  0.20640000   1.06374076
  0.20640000   1.06728250
  0.20640000   1.07076844
  0.20640000   1.07419850
  0.20640000   1.07757264
  0.20640000   1.08089084
  0.20640000   1.08415313
  0.20640000   1.08735957
  0.20640000   1.09051027
  0.20640000   1.09360535
  0.20640000   1.09664499
  0.20660000   1.03114549
  0.20660000   1.03585262
  0.20660000   1.04049988
  0.20660000   1.04508647
  0.20660000   1.04961163
  0.20660000   1.05407466
  0.20660000   1.05847491
  0.20660000   1.06281179
  0.20660000   1.06708474
  0.20660000   1.07129328
  0.20660000   1.07543698
  0.20660000   1.07951544
  0.20660000   1.08352836
  0.20660000   1.08747544
  0.20660000   1.09135648
  0.20660000   1.09517130
  0.20660000   1.09891980
  0.20660000   1.10260192
  0.20660000   1.10621765
  0.20660000   1.10976704
  0.20660000   1.11325017
  0.20660000   1.11666720
  0.20660000   1.12001831
  0.20680000   1.04543423
  0.20680000   1.05066083
  0.20680000   1.05581873
  0.20680000   1.06090683
  0.20680000   1.06592407
  0.20680000   1.07086947
  0.20680000   1.07574212
  0.20680000   1.08054118
  0.20680000   1.08526589
  0.20680000   1.08991554
  0.20680000   1.09448951
  0.20680000   1.09898727
  0.20680000   1.10340832
  0.20680000   1.10775227
  0.20680000   1.11201880
  0.20680000   1.11620765
  0.20680000   1.12031864
  0.20680000   1.12435167
  0.20680000   1.12830669
  0.20680000   1.13218374
  0.20680000   1.13598293
  0.20680000   1.13970442
  0.20680000   1.14334846
  0.20700000   1.05983416
  0.20700000   1.06558234
  0.20700000   1.07125220
  0.20700000   1.07684225
  0.20700000   1.08235109
  0.20700000   1.08777741
  0.20700000   1.09311999
  0.20700000   1.09837770
  0.20700000   1.10354952
  0.20700000   1.10863451
  0.20700000   1.11363184
  0.20700000   1.11854075
  0.20700000   1.12336062
  0.20700000   1.12809090
  0.20700000   1.13273116
  0.20700000   1.13728103
  0.20700000   1.14174030
  0.20700000   1.14610879
  0.20700000   1.15038647
  0.20700000   1.15457337
  0.20700000   1.15866963
  0.20700000   1.16267548
  0.20700000   1.16659123
  0.20720000   1.07434125
  0.20720000   1.08061230
  0.20720000   1.08679449
  0.20720000   1.09288589
  0.20720000   1.09888469
  0.20720000   1.10478921
  0.20720000   1.11059786
  0.20720000   1.11630919
  0.20720000   1.12192188
  0.20720000   1.12743470
  0.20720000   1.13284659
  0.20720000   1.13815660
  0.20720000   1.14336390
  0.20720000   1.14846781
  0.20720000   1.15346778
  0.20720000   1.15836336
  0.20720000   1.16315428
  0.20720000   1.16784035
  0.20720000   1.17242154
  0.20720000   1.17689792
  0.20720000   1.18126971
  0.20720000   1.18553722
  0.20720000   1.18970089
  0.20740000   1.08895113
  0.20740000   1.09574545
  0.20740000   1.10243933
  0.20740000   1.10903036
  0.20740000   1.11551626
  0.20740000   1.12189491
  0.20740000   1.12816430
  0.20740000   1.13432263
  0.20740000   1.14036821
  0.20740000   1.14629955
  0.20740000   1.15211529
  0.20740000   1.15781428
  0.20740000   1.16339550
  0.20740000   1.16885812
  0.20740000   1.17420148
  0.20740000   1.17942508
  0.20740000   1.18452860
  0.20740000   1.18951189
  0.20740000   1.19437494
  0.20740000   1.19911792
  0.20740000   1.20374117
  0.20740000   1.20824515
  0.20740000   1.21263049
  0.20760000   1.10365907
  0.20760000   1.11097609
  0.20760000   1.11817997
  0.20760000   1.12526773
  0.20760000   1.13223656
  0.20760000   1.13908382
  0.20760000   1.14580708
  0.20760000   1.15240409
  0.20760000   1.15887282
  0.20760000   1.16521143
  0.20760000   1.17141832
  0.20760000   1.17749206
  0.20760000   1.18343148
  0.20760000   1.18923562
  0.20760000   1.19490372
  0.20760000   1.20043526
  0.20760000   1.20582992
  0.20760000   1.21108761
  0.20760000   1.21620843
  0.20760000   1.22119270
  0.20760000   1.22604094
  0.20760000   1.23075386
  0.20760000   1.23533234
  0.20780000   1.11846001
  0.20780000   1.12629814
  0.20780000   1.13400918
  0.20780000   1.14158950
  0.20780000   1.14903568
  0.20780000   1.15634454
  0.20780000   1.16351313
  0.20780000   1.17053877
  0.20780000   1.17741902
  0.20780000   1.18415170
  0.20780000   1.19073492
  0.20780000   1.19716703
  0.20780000   1.20344671
  0.20780000   1.20957286
  0.20780000   1.21554471
  0.20780000   1.22136173
  0.20780000   1.22702368
  0.20780000   1.23253059
  0.20780000   1.23788275
  0.20780000   1.24308070
  0.20780000   1.24812525
  0.20780000   1.25301743
  0.20780000   1.25775851
  0.20800000   1.13334848
  0.20800000   1.14170506
  0.20800000   1.14991921
  0.20800000   1.15798657
  0.20800000   1.16590306
  0.20800000   1.17366491
  0.20800000   1.18126860
  0.20800000   1.18871097
  0.20800000   1.19598917
  0.20800000   1.20310066
  0.20800000   1.21004327
  0.20800000   1.21681518
  0.20800000   1.22341489
  0.20800000   1.22984127
  0.20800000   1.23609354
  0.20800000   1.24217126
  0.20800000   1.24807435
  0.20800000   1.25380305
  0.20800000   1.25935792
  0.20800000   1.26473985
  0.20800000   1.26995004
  0.20800000   1.27498997
  0.20800000   1.27986141
  0.20820000   1.14831865
  0.20820000   1.15718985
  0.20820000   1.16590177
  0.20820000   1.17444925
  0.20820000   1.18282749
  0.20820000   1.19103203
  0.20820000   1.19905879
  0.20820000   1.20690410
  0.20820000   1.21456466
  0.20820000   1.22203762
  0.20820000   1.22932054
  0.20820000   1.23641142
  0.20820000   1.24330869
  0.20820000   1.25001123
  0.20820000   1.25651835
  0.20820000   1.26282978
  0.20820000   1.26894569
  0.20820000   1.27486665
  0.20820000   1.28059363
  0.20820000   1.28612800
  0.20820000   1.29147147
  0.20820000   1.29662612
  0.20820000   1.30159435
  0.20840000   1.16336425
  0.20840000   1.17274505
  0.20840000   1.18194805
  0.20840000   1.19096724
  0.20840000   1.19979703
  0.20840000   1.20843224
  0.20840000   1.21686819
  0.20840000   1.22510067
  0.20840000   1.23312598
  0.20840000   1.24094094
  0.20840000   1.24854289
  0.20840000   1.25592973
  0.20840000   1.26309989
  0.20840000   1.27005233
  0.20840000   1.27678656
  0.20840000   1.28330261
  0.20840000   1.28960103
  0.20840000   1.29568287
  0.20840000   1.30154965
  0.20840000   1.30720336
  0.20840000   1.31264642
  0.20840000   1.31788166
  0.20840000   1.32291227
  0.20860000   1.17847865
  0.20860000   1.18836271
  0.20860000   1.19804869
  0.20860000   1.20752963
  0.20860000   1.21679908
  0.20860000   1.22585114
  0.20860000   1.23468047
  0.20860000   1.24328237
  0.20860000   1.25165273
  0.20860000   1.25978808
  0.20860000   1.26768564
  0.20860000   1.27534326
  0.20860000   1.28275947
  0.20860000   1.28993346
  0.20860000   1.29686505
  0.20860000   1.30355474
  0.20860000   1.31000362
  0.20860000   1.31621336
  0.20860000   1.32218625
  0.20860000   1.32792506
  0.20860000   1.33343310
  0.20860000   1.33871414
  0.20860000   1.34377237
  0.20880000   1.19365474
  0.20880000   1.20403439
  0.20880000   1.21419375
  0.20880000   1.22412485
  0.20880000   1.23382035
  0.20880000   1.24327357
  0.20880000   1.25247855
  0.20880000   1.26143007
  0.20880000   1.27012368
  0.20880000   1.27855572
  0.20880000   1.28672333
  0.20880000   1.29462446
  0.20880000   1.30225786
  0.20880000   1.30962310
  0.20880000   1.31672051
  0.20880000   1.32355119
  0.20880000   1.33011698
  0.20880000   1.33642042
  0.20880000   1.34246470
  0.20880000   1.34825363
  0.20880000   1.35379160
  0.20880000   1.35908351
  0.20880000   1.36413475
  0.20900000   1.20888501
  0.20900000   1.21975117
  0.20900000   1.23037276
  0.20900000   1.24074075
  0.20900000   1.25084687
  0.20900000   1.26068366
  0.20900000   1.27024455
  0.20900000   1.27952386
  0.20900000   1.28851687
  0.20900000   1.29721980
  0.20900000   1.30562987
  0.20900000   1.31374526
  0.20900000   1.32156512
  0.20900000   1.32908957
  0.20900000   1.33631966
  0.20900000   1.34325732
  0.20900000   1.34990537
  0.20900000   1.35626740
  0.20900000   1.36234778
  0.20900000   1.36815158
  0.20900000   1.37368448
  0.20900000   1.37895274
  0.20900000   1.38396313
  0.20920000   1.22416150
  0.20920000   1.23550359
  0.20920000   1.24657466
  0.20920000   1.25736453
  0.20920000   1.26786400
  0.20920000   1.27806484
  0.20920000   1.28795991
  0.20920000   1.29754315
  0.20920000   1.30680966
  0.20920000   1.31575569
  0.20920000   1.32437869
  0.20920000   1.33267725
  0.20920000   1.34065115
  0.20920000   1.34830127
  0.20920000   1.35562962
  0.20920000   1.36263923
  0.20920000   1.36933411
  0.20920000   1.37571921
  0.20920000   1.38180031
  0.20920000   1.38758395
  0.20920000   1.39307737
  0.20920000   1.39828840
  0.20920000   1.40322538
  0.20940000   1.23947579
  0.20940000   1.25128171
  0.20940000   1.26278781
  0.20940000   1.27398278
  0.20940000   1.28485646
  0.20940000   1.29539989
  0.20940000   1.30560542
  0.20940000   1.31546673
  0.20940000   1.32497887
  0.20940000   1.33413831
  0.20940000   1.34294291
  0.20940000   1.35139193
  0.20940000   1.35948599
  0.20940000   1.36722704
  0.20940000   1.37461830
  0.20940000   1.38166416
  0.20940000   1.38837015
  0.20940000   1.39474281
  0.20940000   1.40078960
  0.20940000   1.40651883
  0.20940000   1.41193949
  0.20940000   1.41706119
  0.20940000   1.42189405
  0.20960000   1.25481900
  0.20960000   1.26707506
  0.20960000   1.27900005
  0.20960000   1.29058151
  0.20960000   1.30180835
  0.20960000   1.31267095
  0.20960000   1.32316126
  0.20960000   1.33327283
  0.20960000   1.34300088
  0.20960000   1.35234227
  0.20960000   1.36129556
  0.20960000   1.36986092
  0.20960000   1.37804012
  0.20960000   1.38583646
  0.20960000   1.39325469
  0.20960000   1.40030089
  0.20960000   1.40698238
  0.20960000   1.41330761
  0.20960000   1.41928600
  0.20960000   1.42492783
  0.20960000   1.43024411
  0.20960000   1.43524642
  0.20960000   1.43994683
  0.20980000   1.27018181
  0.20980000   1.28287266
  0.20980000   1.29519864
  0.20980000   1.30714614
  0.20980000   1.31870318
  0.20980000   1.32985961
  0.20980000   1.34060711
  0.20980000   1.35093931
  0.20980000   1.36085179
  0.20980000   1.37034211
  0.20980000   1.37940978
  0.20980000   1.38805623
  0.20980000   1.39628470
  0.20980000   1.40410019
  0.20980000   1.41150931
  0.20980000   1.41852016
  0.20980000   1.42514218
  0.20980000   1.43138601
  0.20980000   1.43726330
  0.20980000   1.44278656
  0.20980000   1.44796900
  0.20980000   1.45282436
  0.20980000   1.45736677
  0.21000000   1.28555442
  0.21000000   1.29866304
  0.21000000   1.31137032
  0.21000000   1.32366154
  0.21000000   1.33552396
  0.21000000   1.34694699
  0.21000000   1.35792227
  0.21000000   1.36844371
  0.21000000   1.37850758
  0.21000000   1.38811242
  0.21000000   1.39725907
  0.21000000   1.40595054
  0.21000000   1.41419195
  0.21000000   1.42199034
  0.21000000   1.42935456
  0.21000000   1.43629507
  0.21000000   1.44282376
  0.21000000   1.44895373
  0.21000000   1.45469913
  0.21000000   1.46007492
  0.21000000   1.46509668
  0.21000000   1.46978046
  0.21000000   1.47414254
  0.21020000   1.30092658
  0.21020000   1.31443423
  0.21020000   1.32750132
  0.21020000   1.34011210
  0.21020000   1.35225320
  0.21020000   1.36391378
  0.21020000   1.37508569
  0.21020000   1.38576344
  0.21020000   1.39594428
  0.21020000   1.40562813
  0.21020000   1.41481754
  0.21020000   1.42351752
  0.21020000   1.43173544
  0.21020000   1.43948081
  0.21020000   1.44676509
  0.21020000   1.45360145
  0.21020000   1.46000452
  0.21020000   1.46599018
  0.21020000   1.47157528
  0.21020000   1.47677741
  0.21020000   1.48161468
  0.21020000   1.48610549
  0.21020000   1.49026837
  0.21040000   1.31628760
  0.21040000   1.33017378
  0.21040000   1.34357738
  0.21040000   1.35648173
  0.21040000   1.36887299
  0.21040000   1.38074037
  0.21040000   1.39207618
  0.21040000   1.40287591
  0.21040000   1.41313818
  0.21040000   1.42286471
  0.21040000   1.43206019
  0.21040000   1.44073207
  0.21040000   1.44889043
  0.21040000   1.45654764
  0.21040000   1.46371815
  0.21040000   1.47041818
  0.21040000   1.47666542
  0.21040000   1.48247875
  0.21040000   1.48787791
  0.21040000   1.49288327
  0.21040000   1.49751555
  0.21040000   1.50179555
  0.21040000   1.50574400
  0.21060000   1.33162633
  0.21060000   1.34586880
  0.21060000   1.35958381
  0.21060000   1.37275394
  0.21060000   1.38536515
  0.21060000   1.39740695
  0.21060000   1.40887253
  0.21060000   1.41975873
  0.21060000   1.43006602
  0.21060000   1.43979840
  0.21060000   1.44896315
  0.21060000   1.45757067
  0.21060000   1.46563416
  0.21060000   1.47316929
  0.21060000   1.48019387
  0.21060000   1.48672750
  0.21060000   1.49279118
  0.21060000   1.49840697
  0.21060000   1.50359769
  0.21060000   1.50838654
  0.21060000   1.51279685
  0.21060000   1.51685185
  0.21060000   1.52057439
  0.21080000   1.34693121
  0.21080000   1.36150596
  0.21080000   1.37550551
  0.21080000   1.38891191
  0.21080000   1.40171120
  0.21080000   1.41389361
  0.21080000   1.42545360
  0.21080000   1.43638988
  0.21080000   1.44670524
  0.21080000   1.45640647
  0.21080000   1.46550400
  0.21080000   1.47401164
  0.21080000   1.48194617
  0.21080000   1.48932698
  0.21080000   1.49617559
  0.21080000   1.50251523
  0.21080000   1.50837046
  0.21080000   1.51376668
  0.21080000   1.51872982
  0.21080000   1.52328595
  0.21080000   1.52746101
  0.21080000   1.53128051
  0.21080000   1.53476933
  0.21100000   1.36219027
  0.21100000   1.37707154
  0.21100000   1.39132703
  0.21100000   1.40493854
  0.21100000   1.41789258
  0.21100000   1.43018051
  0.21100000   1.44179859
  0.21100000   1.45274791
  0.21100000   1.46303417
  0.21100000   1.47266749
  0.21100000   1.48166199
  0.21100000   1.49003540
  0.21100000   1.49780854
  0.21100000   1.50500488
  0.21100000   1.51164996
  0.21100000   1.51777091
  0.21100000   1.52339596
  0.21100000   1.52855395
  0.21100000   1.53327394
  0.21100000   1.53758481
  0.21100000   1.54151500
  0.21100000   1.54509216
  0.21100000   1.54834301
  0.21120000   1.37739115
  0.21120000   1.39255148
  0.21120000   1.40703264
  0.21120000   1.42081657
  0.21120000   1.43389068
  0.21120000   1.44624800
  0.21120000   1.45788713
  0.21120000   1.46881214
  0.21120000   1.47903227
  0.21120000   1.48856155
  0.21120000   1.49741833
  0.21120000   1.50562476
  0.21120000   1.51320613
  0.21120000   1.52019033
  0.21120000   1.52660719
  0.21120000   1.53248789
  0.21120000   1.53786442
  0.21120000   1.54276907
  0.21120000   1.54723396
  0.21120000   1.55129069
  0.21120000   1.55496998
  0.21120000   1.55830146
  0.21120000   1.56131345
  0.21140000   1.39252115
  0.21140000   1.40793139
  0.21140000   1.42260639
  0.21140000   1.43652865
  0.21140000   1.44968702
  0.21140000   1.46207676
  0.21140000   1.47369949
  0.21140000   1.48456289
  0.21140000   1.49468036
  0.21140000   1.50407048
  0.21140000   1.51275638
  0.21140000   1.52076508
  0.21140000   1.52812674
  0.21140000   1.53487396
  0.21140000   1.54104103
  0.21140000   1.54666330
  0.21140000   1.55177651
  0.21140000   1.55641633
  0.21140000   1.56061781
  0.21140000   1.56441504
  0.21140000   1.56784087
  0.21140000   1.57092659
  0.21140000   1.57370186
  0.21160000   1.40756725
  0.21160000   1.42319665
  0.21160000   1.43803219
  0.21160000   1.45205746
  0.21160000   1.46526334
  0.21160000   1.47764801
  0.21160000   1.48921677
  0.21160000   1.49998165
  0.21160000   1.50996085
  0.21160000   1.51917812
  0.21160000   1.52766189
  0.21160000   1.53544449
  0.21160000   1.54256128
  0.21160000   1.54904977
  0.21160000   1.55494884
  0.21160000   1.56029799
  0.21160000   1.56513668
  0.21160000   1.56950377
  0.21160000   1.57343703
  0.21160000   1.57697284
  0.21160000   1.58014581
  0.21160000   1.58298866
  0.21160000   1.58553207
  0.21180000   1.42251616
  0.21180000   1.43833246
  0.21180000   1.45329391
  0.21180000   1.46738582
  0.21180000   1.48060178
  0.21180000   1.49294363
  0.21180000   1.50442110
  0.21180000   1.51505129
  0.21180000   1.52485792
  0.21180000   1.53387044
  0.21180000   1.54212311
  0.21180000   1.54965396
  0.21180000   1.55650376
  0.21180000   1.56271510
  0.21180000   1.56833145
  0.21180000   1.57339639
  0.21180000   1.57795291
  0.21180000   1.58204285
  0.21180000   1.58570644
  0.21180000   1.58898199
  0.21180000   1.59190562
  0.21180000   1.59451111
  0.21180000   1.59682986
  0.21200000   1.43735435
  0.21200000   1.45332387
  0.21200000   1.46837546
  0.21200000   1.48249680
  0.21200000   1.49568500
  0.21200000   1.50794635
  0.21200000   1.51929581
  0.21200000   1.52975629
  0.21200000   1.53935769
  0.21200000   1.54813576
  0.21200000   1.55613100
  0.21200000   1.56338742
  0.21200000   1.56995140
  0.21200000   1.57587061
  0.21200000   1.58119306
  0.21200000   1.58596622
  0.21200000   1.59023638
  0.21200000   1.59404806
  0.21200000   1.59744361
  0.21200000   1.60046293
  0.21200000   1.60314327
  0.21200000   1.60551915
  0.21200000   1.60762234
  0.21220000   1.45206815
  0.21220000   1.46815593
  0.21220000   1.48326088
  0.21220000   1.49737388
  0.21220000   1.51049635
  0.21220000   1.52263991
  0.21220000   1.53382559
  0.21220000   1.54408286
  0.21220000   1.55344841
  0.21220000   1.56196483
  0.21220000   1.56967921
  0.21220000   1.57664174
  0.21220000   1.58290447
  0.21220000   1.58852010
  0.21220000   1.59354098
  0.21220000   1.59801824
  0.21220000   1.60200113
  0.21220000   1.60553649
  0.21220000   1.60866842
  0.21220000   1.61143802
  0.21220000   1.61388330
  0.21220000   1.61603916
  0.21220000   1.61793743
  0.21240000   1.46664374
  0.21240000   1.48281371
  0.21240000   1.49793450
  0.21240000   1.51200103
  0.21240000   1.52502000
  0.21240000   1.53700923
  0.21240000   1.54799668
  0.21240000   1.55801910
  0.21240000   1.56712058
  0.21240000   1.57535096
  0.21240000   1.58276417
  0.21240000   1.58941671
  0.21240000   1.59536625
  0.21240000   1.60067035
  0.21240000   1.60538543
  0.21240000   1.60956592
  0.21240000   1.61326366
  0.21240000   1.61652740
  0.21240000   1.61940256
  0.21240000   1.62193105
  0.21240000   1.62415128
  0.21240000   1.62609817
  0.21240000   1.62780331
  0.21260000   1.48106730
  0.21260000   1.49728244
  0.21260000   1.51238098
  0.21260000   1.52636290
  0.21260000   1.53924111
  0.21260000   1.55104059
  0.21260000   1.56179702
  0.21260000   1.57155516
  0.21260000   1.58036702
  0.21260000   1.58828999
  0.21260000   1.59538505
  0.21260000   1.60171496
  0.21260000   1.60734286
  0.21260000   1.61233088
  0.21260000   1.61673917
  0.21260000   1.62062505
  0.21260000   1.62404249
  0.21260000   1.62704172
  0.21260000   1.62966904
  0.21260000   1.63196678
  0.21260000   1.63397336
  0.21260000   1.63572340
  0.21260000   1.63724798
  0.21280000   1.49532502
  0.21280000   1.51154756
  0.21280000   1.52658552
  0.21280000   1.54044493
  0.21280000   1.55314597
  0.21280000   1.56472171
  0.21280000   1.57521637
  0.21280000   1.58468332
  0.21280000   1.59318292
  0.21280000   1.60078037
  0.21280000   1.60754368
  0.21280000   1.61354179
  0.21280000   1.61884299
  0.21280000   1.62351364
  0.21280000   1.62761717
  0.21280000   1.63121333
  0.21280000   1.63435774
  0.21280000   1.63710163
  0.21280000   1.63949175
  0.21280000   1.64157046
  0.21280000   1.64337581
  0.21280000   1.64494186
  0.21280000   1.64629887
  0.21300000   1.50940322
  0.21300000   1.52559488
  0.21300000   1.54053391
  0.21300000   1.55423350
  0.21300000   1.56672215
  0.21300000   1.57804196
  0.21300000   1.58824641
  0.21300000   1.59739804
  0.21300000   1.60556588
  0.21300000   1.61282304
  0.21300000   1.61924445
  0.21300000   1.62490497
  0.21300000   1.62987770
  0.21300000   1.63423274
  0.21300000   1.63803630
  0.21300000   1.64135004
  0.21300000   1.64423073
  0.21300000   1.64673013
  0.21300000   1.64889503
  0.21300000   1.65076740
  0.21300000   1.65238465
  0.21300000   1.65377995
  0.21300000   1.65498257
  0.21320000   1.52328840
  0.21320000   1.53941063
  0.21320000   1.55421266
  0.21320000   1.56771604
  0.21320000   1.57995861
  0.21320000   1.59099238
  0.21320000   1.60088081
  0.21320000   1.60969602
  0.21320000   1.61751587
  0.21320000   1.62442136
  0.21320000   1.63049414
  0.21320000   1.63581457
  0.21320000   1.64046011
  0.21320000   1.64450407
  0.21320000   1.64801488
  0.21320000   1.65105557
  0.21320000   1.65368355
  0.21320000   1.65595065
  0.21320000   1.65790327
  0.21320000   1.65958267
  0.21320000   1.66102530
  0.21320000   1.66226323
  0.21320000   1.66332452
  0.21340000   1.53696738
  0.21340000   1.55298159
  0.21340000   1.56760918
  0.21340000   1.58088116
  0.21340000   1.59284581
  0.21340000   1.60356586
  0.21340000   1.61311530
  0.21340000   1.62157614
  0.21340000   1.62903515
  0.21340000   1.63558098
  0.21340000   1.64130169
  0.21340000   1.64628266
  0.21340000   1.65060510
  0.21340000   1.65434499
  0.21340000   1.65757238
  0.21340000   1.66035110
  0.21340000   1.66273871
  0.21340000   1.66478667
  0.21340000   1.66654061
  0.21340000   1.66804075
  0.21340000   1.66932236
  0.21340000   1.67041617
  0.21340000   1.67134891
  0.21360000   1.55042733
  0.21360000   1.56629524
  0.21360000   1.58071180
  0.21360000   1.59371877
  0.21360000   1.60537581
  0.21360000   1.61575711
  0.21360000   1.62494766
  0.21360000   1.63303948
  0.21360000   1.64012815
  0.21360000   1.64630969
  0.21360000   1.65167803
  0.21360000   1.65632302
  0.21360000   1.66032901
  0.21360000   1.66377399
  0.21360000   1.66672903
  0.21360000   1.66925823
  0.21360000   1.67141881
  0.21360000   1.67326144
  0.21360000   1.67483063
  0.21360000   1.67616533
  0.21360000   1.67729935
  0.21360000   1.67826198
  0.21360000   1.67907849
  0.21380000   1.56365592
  0.21380000   1.57933978
  0.21380000   1.59350998
  0.21380000   1.60622017
  0.21380000   1.61754234
  0.21380000   1.62756277
  0.21380000   1.63637770
  0.21380000   1.64408921
  0.21380000   1.65080139
  0.21380000   1.65661718
  0.21380000   1.66163580
  0.21380000   1.66595089
  0.21380000   1.66964930
  0.21380000   1.67281033
  0.21380000   1.67550551
  0.21380000   1.67779867
  0.21380000   1.67974623
  0.21380000   1.68139768
  0.21380000   1.68279617
  0.21380000   1.68397907
  0.21380000   1.68497863
  0.21380000   1.68582254
  0.21380000   1.68653453
  0.21400000   1.57664139
  0.21400000   1.59210430
  0.21400000   1.60599434
  0.21400000   1.61837815
  0.21400000   1.62934087
  0.21400000   1.63898135
  0.21400000   1.64740723
  0.21400000   1.65473046
  0.21400000   1.66106325
  0.21400000   1.66651484
  0.21400000   1.67118908
  0.21400000   1.67518267
  0.21400000   1.67858424
  0.21400000   1.68147377
  0.21400000   1.68392265
  0.21400000   1.68599394
  0.21400000   1.68774286
  0.21400000   1.68921741
  0.21400000   1.69045907
  0.21400000   1.69150350
  0.21400000   1.69238123
  0.21400000   1.69311828
  0.21400000   1.69373679
  0.21420000   1.58937264
  0.21420000   1.60457888
  0.21420000   1.61815676
  0.21420000   1.63018701
  0.21420000   1.64076859
  0.21420000   1.65001324
  0.21420000   1.65803996
  0.21420000   1.66497023
  0.21420000   1.67092379
  0.21420000   1.67601553
  0.21420000   1.68035312
  0.21420000   1.68403561
  0.21420000   1.68715264
  0.21420000   1.68978426
  0.21420000   1.69200117
  0.21420000   1.69386518
  0.21420000   1.69542996
  0.21420000   1.69674173
  0.21420000   1.69784012
  0.21420000   1.69875892
  0.21420000   1.69952685
  0.21420000   1.70016821
  0.21420000   1.70070353
  0.21440000   1.60183936
  0.21440000   1.61675463
  0.21440000   1.62999049
  0.21440000   1.64164264
  0.21440000   1.65182446
  0.21440000   1.66066066
  0.21440000   1.66828140
  0.21440000   1.67481717
  0.21440000   1.68039457
  0.21440000   1.68513332
  0.21440000   1.68914412
  0.21440000   1.69252754
  0.21440000   1.69537357
  0.21440000   1.69776170
  0.21440000   1.69976141
  0.21440000   1.70143290
  0.21440000   1.70282793
  0.21440000   1.70399074
  0.21440000   1.70495892
  0.21440000   1.70576432
  0.21440000   1.70643378
  0.21440000   1.70698987
  0.21440000   1.70745153
  0.21460000   1.61403206
  0.21460000   1.62862383
  0.21460000   1.64149015
  0.21460000   1.65274256
  0.21460000   1.66250913
  0.21460000   1.67092755
  0.21460000   1.67813871
  0.21460000   1.68428143
  0.21460000   1.68948839
  0.21460000   1.69388325
  0.21460000   1.69757889
  0.21460000   1.70067664
  0.21460000   1.70326613
  0.21460000   1.70542571
  0.21460000   1.70722321
  0.21460000   1.70871684
  0.21460000   1.70995621
  0.21460000   1.71098339
  0.21460000   1.71183385
  0.21460000   1.71253738
  0.21460000   1.71311896
  0.21460000   1.71359943
  0.21460000   1.71399615
  0.21480000   1.62594220
  0.21480000   1.64017996
  0.21480000   1.65265185
  0.21480000   1.66348585
  0.21480000   1.67282495
  0.21480000   1.68081951
  0.21480000   1.68762056
  0.21480000   1.69337449
  0.21480000   1.69821909
  0.21480000   1.70228108
  0.21480000   1.70567467
  0.21480000   1.70850116
  0.21480000   1.71084918
  0.21480000   1.71279544
  0.21480000   1.71440569
  0.21480000   1.71573586
  0.21480000   1.71683321
  0.21480000   1.71773751
  0.21480000   1.71848201
  0.21480000   1.71909448
  0.21480000   1.71959799
  0.21480000   1.72001169
  0.21480000   1.72035142
  0.21500000   1.63756226
  0.21500000   1.65141776
  0.21500000   1.66347311
  0.21500000   1.67387319
  0.21500000   1.68277584
  0.21500000   1.69034363
  0.21500000   1.69673697
  0.21500000   1.70210887
  0.21500000   1.70660132
  0.21500000   1.71034310
  0.21500000   1.71344889
  0.21500000   1.71601925
  0.21500000   1.71814123
  0.21500000   1.71988942
  0.21500000   1.72132714
  0.21500000   1.72250782
  0.21500000   1.72347622
  0.21500000   1.72426970
  0.21500000   1.72491929
  0.21500000   1.72545070
  0.21500000   1.72588516
  0.21500000   1.72624016
  0.21500000   1.72653009
  0.21520000   1.64888576
  0.21520000   1.66233328
  0.21520000   1.67395296
  0.21520000   1.68390681
  0.21520000   1.69236723
  0.21520000   1.69950836
  0.21520000   1.70549908
  0.21520000   1.71049802
  0.21520000   1.71465029
  0.21520000   1.71808582
  0.21520000   1.72091894
  0.21520000   1.72324877
  0.21520000   1.72516024
  0.21520000   1.72672542
  0.21520000   1.72800496
  0.21520000   1.72904957
  0.21520000   1.72990141
  0.21520000   1.73059540
  0.21520000   1.73116034
  0.21520000   1.73161991
  0.21520000   1.73199354
  0.21520000   1.73229715
  0.21520000   1.73254375
  0.21540000   1.65990741
  0.21540000   1.67292392
  0.21540000   1.68409186
  0.21540000   1.69359037
  0.21540000   1.70160593
  0.21540000   1.70832338
  0.21540000   1.71391904
  0.21540000   1.71855606
  0.21540000   1.72238162
  0.21540000   1.72552587
  0.21540000   1.72810201
  0.21540000   1.73020710
  0.21540000   1.73192350
  0.21540000   1.73332041
  0.21540000   1.73445557
  0.21540000   1.73537688
  0.21540000   1.73612382
  0.21540000   1.73672887
  0.21540000   1.73721861
  0.21540000   1.73761477
  0.21540000   1.73793505
  0.21540000   1.73819385
  0.21540000   1.73840289
  0.21560000   1.67062302
  0.21560000   1.68318839
  0.21560000   1.69389168
  0.21560000   1.70292894
  0.21560000   1.71050000
  0.21560000   1.71679940
  0.21560000   1.72200976
  0.21560000   1.72629757
  0.21560000   1.72981109
  0.21560000   1.73267977
  0.21560000   1.73501494
  0.21560000   1.73691108
  0.21560000   1.73844754
  0.21560000   1.73969042
  0.21560000   1.74069440
  0.21560000   1.74150444
  0.21560000   1.74215738
  0.21560000   1.74268324
  0.21560000   1.74310646
  0.21560000   1.74344687
  0.21560000   1.74372053
  0.21560000   1.74394041
  0.21560000   1.74411701
  0.21580000   1.68102967
  0.21580000   1.69312674
  0.21580000   1.70335566
  0.21580000   1.71192886
  0.21580000   1.71905861
  0.21580000   1.72494800
  0.21580000   1.72978472
  0.21580000   1.73373747
  0.21580000   1.73695450
  0.21580000   1.73956377
  0.21580000   1.74167408
  0.21580000   1.74337682
  0.21580000   1.74474806
  0.21580000   1.74585056
  0.21580000   1.74673584
  0.21580000   1.74744590
  0.21580000   1.74801492
  0.21580000   1.74847055
  0.21580000   1.74883515
  0.21580000   1.74912674
  0.21580000   1.74935981
  0.21580000   1.74954602
  0.21580000   1.74969471
  0.21600000   1.69112560
  0.21600000   1.70274034
  0.21600000   1.71248832
  0.21600000   1.72059763
  0.21600000   1.72729190
  0.21600000   1.73278148
  0.21600000   1.73725785
  0.21600000   1.74089076
  0.21600000   1.74382750
  0.21600000   1.74619374
  0.21600000   1.74809517
  0.21600000   1.74961973
  0.21600000   1.75083989
  0.21600000   1.75181499
  0.21600000   1.75259328
  0.21600000   1.75321385
  0.21600000   1.75370825
  0.21600000   1.75410184
  0.21600000   1.75441497
  0.21600000   1.75466396
  0.21600000   1.75486183
  0.21600000   1.75501900
  0.21600000   1.75514377
  0.21620000   1.70091030
  0.21620000   1.71203180
  0.21620000   1.72129537
  0.21620000   1.72894380
  0.21620000   1.73521081
  0.21620000   1.74031266
  0.21620000   1.74444331
  0.21620000   1.74777243
  0.21620000   1.75044546
  0.21620000   1.75258504
  0.21620000   1.75429330
  0.21620000   1.75565436
  0.21620000   1.75673696
  0.21620000   1.75759687
  0.21620000   1.75827912
  0.21620000   1.75881990
  0.21620000   1.75924819
  0.21620000   1.75958716
  0.21620000   1.75985527
  0.21620000   1.76006721
  0.21620000   1.76023466
  0.21620000   1.76036689
  0.21620000   1.76047124
  0.21640000   1.71038444
  0.21640000   1.72100493
  0.21640000   1.72978361
  0.21640000   1.73697682
  0.21640000   1.74282694
  0.21640000   1.74755472
  0.21640000   1.75135535
  0.21640000   1.75439731
  0.21640000   1.75682332
  0.21640000   1.75875245
  0.21640000   1.76028281
  0.21640000   1.76149447
  0.21640000   1.76245229
  0.21640000   1.76320847
  0.21640000   1.76380481
  0.21640000   1.76427469
  0.21640000   1.76464463
  0.21640000   1.76493569
  0.21640000   1.76516455
  0.21640000   1.76534440
  0.21640000   1.76548565
  0.21640000   1.76559652
  0.21640000   1.76568348
  0.21660000   1.71954987
  0.21660000   1.72966466
  0.21660000   1.73796084
  0.21660000   1.74470690
  0.21660000   1.75015238
  0.21660000   1.75452110
  0.21660000   1.75800816
  0.21660000   1.76077990
  0.21660000   1.76297557
  0.21660000   1.76471009
  0.21660000   1.76607726
  0.21660000   1.76715293
  0.21660000   1.76799799
  0.21660000   1.76866109
  0.21660000   1.76918088
  0.21660000   1.76958798
  0.21660000   1.76990659
  0.21660000   1.77015577
  0.21660000   1.77035053
  0.21660000   1.77050267
  0.21660000   1.77062143
  0.21660000   1.77071407
  0.21660000   1.77078629
  0.21680000   1.72840954
  0.21680000   1.73801697
  0.21680000   1.74583571
  0.21680000   1.75214487
  0.21680000   1.75719959
  0.21680000   1.76122526
  0.21680000   1.76441577
  0.21680000   1.76693434
  0.21680000   1.76891608
  0.21680000   1.77047138
  0.21680000   1.77168944
  0.21680000   1.77264177
  0.21680000   1.77338531
  0.21680000   1.77396518
  0.21680000   1.77441697
  0.21680000   1.77476868
  0.21680000   1.77504228
  0.21680000   1.77525498
  0.21680000   1.77542022
  0.21680000   1.77554850
  0.21680000   1.77564802
  0.21680000   1.77572518
  0.21680000   1.77578493
  0.21700000   1.73696748
  0.21700000   1.74606880
  0.21700000   1.75341763
  0.21700000   1.75930206
  0.21700000   1.76398121
  0.21700000   1.76768067
  0.21700000   1.77059192
  0.21700000   1.77287426
  0.21700000   1.77465813
  0.21700000   1.77604899
  0.21700000   1.77713130
  0.21700000   1.77797217
  0.21700000   1.77862462
  0.21700000   1.77913032
  0.21700000   1.77952192
  0.21700000   1.77982492
  0.21700000   1.78005920
  0.21700000   1.78024021
  0.21700000   1.78037996
  0.21700000   1.78048779
  0.21700000   1.78057091
  0.21700000   1.78063493
  0.21700000   1.78068418
  0.21720000   1.74522873
  0.21720000   1.75382791
  0.21720000   1.76071660
  0.21720000   1.76619015
  0.21720000   1.77051000
  0.21720000   1.77390058
  0.21720000   1.77654996
  0.21720000   1.77861278
  0.21720000   1.78021431
  0.21720000   1.78145485
  0.21720000   1.78241401
  0.21720000   1.78315451
  0.21720000   1.78372550
  0.21720000   1.78416532
  0.21720000   1.78450382
  0.21720000   1.78476412
  0.21720000   1.78496413
  0.21720000   1.78511772
  0.21720000   1.78523555
  0.21720000   1.78532588
  0.21720000   1.78539506
  0.21720000   1.78544799
  0.21720000   1.78548842
  0.21740000   1.75319922
  0.21740000   1.76130279
  0.21740000   1.76774314
  0.21740000   1.77282103
  0.21740000   1.77679866
  0.21740000   1.77989802
  0.21740000   1.78230281
  0.21740000   1.78416239
  0.21740000   1.78559651
  0.21740000   1.78670013
  0.21740000   1.78754795
  0.21740000   1.78819836
  0.21740000   1.78869673
  0.21740000   1.78907824
  0.21740000   1.78937002
  0.21740000   1.78959301
  0.21740000   1.78976328
  0.21740000   1.78989319
  0.21740000   1.78999222
  0.21740000   1.79006764
  0.21740000   1.79012501
  0.21740000   1.79016859
  0.21740000   1.79020164
  0.21760000   1.76088573
  0.21760000   1.76850257
  0.21760000   1.77450811
  0.21760000   1.77920672
  0.21760000   1.78285977
  0.21760000   1.78568564
  0.21760000   1.78786286
  0.21760000   1.78953498
  0.21760000   1.79081593
  0.21760000   1.79179524
  0.21760000   1.79254274
  0.21760000   1.79311254
  0.21760000   1.79354640
  0.21760000   1.79387643
  0.21760000   1.79412725
  0.21760000   1.79431773
  0.21760000   1.79446224
  0.21760000   1.79457179
  0.21760000   1.79465475
  0.21760000   1.79471750
  0.21760000   1.79476489
  0.21760000   1.79480063
  0.21760000   1.79482753
  0.21780000   1.76829576
  0.21780000   1.77543688
  0.21780000   1.78102266
  0.21780000   1.78535921
  0.21780000   1.78870567
  0.21780000   1.79127570
  0.21780000   1.79324195
  0.21780000   1.79474176
  0.21780000   1.79588305
  0.21780000   1.79674989
  0.21780000   1.79740727
  0.21780000   1.79790517
  0.21780000   1.79828187
  0.21780000   1.79856661
  0.21780000   1.79878163
  0.21780000   1.79894387
  0.21780000   1.79906615
  0.21780000   1.79915824
  0.21780000   1.79922749
  0.21780000   1.79927950
  0.21780000   1.79931850
  0.21780000   1.79934768
  0.21780000   1.79936945
  0.21800000   1.77543746
  0.21800000   1.78211575
  0.21800000   1.78729803
  0.21800000   1.79129041
  0.21800000   1.79434839
  0.21800000   1.79667998
  0.21800000   1.79845134
  0.21800000   1.79979329
  0.21800000   1.80080766
  0.21800000   1.80157304
  0.21800000   1.80214972
  0.21800000   1.80258369
  0.21800000   1.80290991
  0.21800000   1.80315491
  0.21800000   1.80333872
  0.21800000   1.80347650
  0.21800000   1.80357966
  0.21800000   1.80365681
  0.21800000   1.80371442
  0.21800000   1.80375736
  0.21800000   1.80378931
  0.21800000   1.80381301
  0.21800000   1.80383054
  0.21820000   1.78231950
  0.21820000   1.78854950
  0.21820000   1.79334554
  0.21820000   1.79701203
  0.21820000   1.79979958
  0.21820000   1.80190972
  0.21820000   1.80350167
  0.21820000   1.80469949
  0.21820000   1.80559886
  0.21820000   1.80627301
  0.21820000   1.80677763
  0.21820000   1.80715491
  0.21820000   1.80743668
  0.21820000   1.80764691
  0.21820000   1.80780360
  0.21820000   1.80792026
  0.21820000   1.80800701
  0.21820000   1.80807142
  0.21820000   1.80811916
  0.21820000   1.80815448
  0.21820000   1.80818053
  0.21820000   1.80819968
  0.21820000   1.80821369
  0.21840000   1.78895103
  0.21840000   1.79474864
  0.21840000   1.79917644
  0.21840000   1.80253551
  0.21840000   1.80507046
  0.21840000   1.80697565
  0.21840000   1.80840296
  0.21840000   1.80946958
  0.21840000   1.81026508
  0.21840000   1.81085743
  0.21840000   1.81129791
  0.21840000   1.81162508
  0.21840000   1.81186781
  0.21840000   1.81204772
  0.21840000   1.81218090
  0.21840000   1.81227937
  0.21840000   1.81235207
  0.21840000   1.81240566
  0.21840000   1.81244506
  0.21840000   1.81247397
  0.21840000   1.81249510
  0.21840000   1.81251047
  0.21840000   1.81252160
  0.21860000   1.79534148
  0.21860000   1.80072376
  0.21860000   1.80480183
  0.21860000   1.80787198
  0.21860000   1.81017180
  0.21860000   1.81188792
  0.21860000   1.81316463
  0.21860000   1.81411219
  0.21860000   1.81481415
  0.21860000   1.81533336
  0.21860000   1.81571690
  0.21860000   1.81599988
  0.21860000   1.81620843
  0.21860000   1.81636195
  0.21860000   1.81647482
  0.21860000   1.81655768
  0.21860000   1.81661840
  0.21860000   1.81666280
  0.21860000   1.81669519
  0.21860000   1.81671873
  0.21860000   1.81673577
  0.21860000   1.81674802
  0.21860000   1.81675678
  0.21880000   1.80150057
  0.21880000   1.80648547
  0.21880000   1.81023262
  0.21880000   1.81303216
  0.21880000   1.81511386
  0.21880000   1.81665611
  0.21880000   1.81779546
  0.21880000   1.81863530
  0.21880000   1.81925326
  0.21880000   1.81970727
  0.21880000   1.82004040
  0.21880000   1.82028453
  0.21880000   1.82046323
  0.21880000   1.82059386
  0.21880000   1.82068922
  0.21880000   1.82075870
  0.21880000   1.82080923
  0.21880000   1.82084588
  0.21880000   1.82087237
  0.21880000   1.82089143
  0.21880000   1.82090508
  0.21880000   1.82091477
  0.21880000   1.82092158
  0.21900000   1.80743816
  0.21900000   1.81204428
  0.21900000   1.81547943
  0.21900000   1.81802639
  0.21900000   1.81990635
  0.21900000   1.82128920
  0.21900000   1.82230367
  0.21900000   1.82304632
  0.21900000   1.82358904
  0.21900000   1.82398508
  0.21900000   1.82427371
  0.21900000   1.82448378
  0.21900000   1.82463647
  0.21900000   1.82474730
  0.21900000   1.82482761
  0.21900000   1.82488567
  0.21900000   1.82492755
  0.21900000   1.82495766
  0.21900000   1.82497921
  0.21900000   1.82499456
  0.21900000   1.82500540
  0.21900000   1.82501298
  0.21900000   1.82501820
  0.21920000   1.81316417
  0.21920000   1.81741057
  0.21920000   1.82055255
  0.21920000   1.82286451
  0.21920000   1.82455850
  0.21920000   1.82579565
  0.21920000   1.82669688
  0.21920000   1.82735207
  0.21920000   1.82782761
  0.21920000   1.82817225
  0.21920000   1.82842168
  0.21920000   1.82860196
  0.21920000   1.82873207
  0.21920000   1.82882581
  0.21920000   1.82889321
  0.21920000   1.82894156
  0.21920000   1.82897612
  0.21920000   1.82900073
  0.21920000   1.82901816
  0.21920000   1.82903042
  0.21920000   1.82903895
  0.21920000   1.82904480
  0.21920000   1.82904874
  0.21940000   1.81868851
  0.21940000   1.82259448
  0.21940000   1.82546193
  0.21940000   1.82755592
  0.21940000   1.82907896
  0.21940000   1.83018331
  0.21940000   1.83098215
  0.21940000   1.83155887
  0.21940000   1.83197456
  0.21940000   1.83227373
  0.21940000   1.83248874
  0.21940000   1.83264304
  0.21940000   1.83275358
  0.21940000   1.83283262
  0.21940000   1.83288899
  0.21940000   1.83292908
  0.21940000   1.83295747
  0.21940000   1.83297748
  0.21940000   1.83299147
  0.21940000   1.83300117
  0.21940000   1.83300781
  0.21940000   1.83301225
  0.21940000   1.83301515
  0.21960000   1.82402102
  0.21960000   1.82760591
  0.21960000   1.83021708
  0.21960000   1.83210953
  0.21960000   1.83347588
  0.21960000   1.83445952
  0.21960000   1.83516602
  0.21960000   1.83567251
  0.21960000   1.83603502
  0.21960000   1.83629409
  0.21960000   1.83647895
  0.21960000   1.83661064
  0.21960000   1.83670427
  0.21960000   1.83677069
  0.21960000   1.83681766
  0.21960000   1.83685075
  0.21960000   1.83687395
  0.21960000   1.83689011
  0.21960000   1.83690126
  0.21960000   1.83690885
  0.21960000   1.83691393
  0.21960000   1.83691724
  0.21960000   1.83691929
  0.21980000   1.82917139
  0.21980000   1.83245444
  0.21980000   1.83482710
  0.21980000   1.83653372
  0.21980000   1.83775688
  0.21980000   1.83863109
  0.21980000   1.83925454
  0.21980000   1.83969833
  0.21980000   1.84001372
  0.21980000   1.84023750
  0.21980000   1.84039601
  0.21980000   1.84050808
  0.21980000   1.84058713
  0.21980000   1.84064274
  0.21980000   1.84068172
  0.21980000   1.84070891
  0.21980000   1.84072775
  0.21980000   1.84074071
  0.21980000   1.84074950
  0.21980000   1.84075536
  0.21980000   1.84075917
  0.21980000   1.84076155
  0.21980000   1.84076292
  0.22000000   1.83414910
  0.22000000   1.83714929
  0.22000000   1.83930065
  0.22000000   1.84083643
  0.22000000   1.84192904
  0.22000000   1.84270432
  0.22000000   1.84325326
  0.22000000   1.84364122
  0.22000000   1.84391495
  0.22000000   1.84410775
  0.22000000   1.84424330
  0.22000000   1.84433839
  0.22000000   1.84440491
  0.22000000   1.84445130
  0.22000000   1.84448349
  0.22000000   1.84450571
  0.22000000   1.84452091
  0.22000000   1.84453120
  0.22000000   1.84453804
  0.22000000   1.84454249
  0.22000000   1.84454527
  0.22000000   1.84454690
  0.22000000   1.84454773
  0.22020000   1.83896340
  0.22020000   1.84169932
  0.22020000   1.84364592
  0.22020000   1.84502505
  0.22020000   1.84599900
  0.22020000   1.84668505
  0.22020000   1.84716731
  0.22020000   1.84750568
  0.22020000   1.84774267
  0.22020000   1.84790835
  0.22020000   1.84802393
  0.22020000   1.84810435
  0.22020000   1.84816013
  0.22020000   1.84819866
  0.22020000   1.84822512
  0.22020000   1.84824316
  0.22020000   1.84825532
  0.22020000   1.84826340
  0.22020000   1.84826865
  0.22020000   1.84827194
  0.22020000   1.84827389
  0.22020000   1.84827491
  0.22020000   1.84827531
  0.22040000   1.84362323
  0.22040000   1.84611297
  0.22040000   1.84787066
  0.22040000   1.84910655
  0.22040000   1.84997288
  0.22040000   1.85057867
  0.22040000   1.85100139
  0.22040000   1.85129582
  0.22040000   1.85150049
  0.22040000   1.85164248
  0.22040000   1.85174074
  0.22040000   1.85180854
  0.22040000   1.85185513
  0.22040000   1.85188698
  0.22040000   1.85190860
  0.22040000   1.85192314
  0.22040000   1.85193278
  0.22040000   1.85193903
  0.22040000   1.85194297
  0.22040000   1.85194532
  0.22040000   1.85194659
  0.22040000   1.85194713
  0.22040000   1.85194719
  0.22060000   1.84813723
  0.22060000   1.85039830
  0.22060000   1.85198215
  0.22060000   1.85308739
  0.22060000   1.85385637
  0.22060000   1.85439013
  0.22060000   1.85475984
  0.22060000   1.85501541
  0.22060000   1.85519173
  0.22060000   1.85531307
  0.22060000   1.85539635
  0.22060000   1.85545329
  0.22060000   1.85549204
  0.22060000   1.85551824
  0.22060000   1.85553579
  0.22060000   1.85554741
  0.22060000   1.85555495
  0.22060000   1.85555971
  0.22060000   1.85556257
  0.22060000   1.85556416
  0.22060000   1.85556488
  0.22060000   1.85556504
  0.22060000   1.85556483
  0.22080000   1.85251368
  0.22080000   1.85456292
  0.22080000   1.85598723
  0.22080000   1.85697360
  0.22080000   1.85765475
  0.22080000   1.85812401
  0.22080000   1.85844661
  0.22080000   1.85866792
  0.22080000   1.85881940
  0.22080000   1.85892280
  0.22080000   1.85899314
  0.22080000   1.85904079
  0.22080000   1.85907286
  0.22080000   1.85909429
  0.22080000   1.85910843
  0.22080000   1.85911761
  0.22080000   1.85912342
  0.22080000   1.85912695
  0.22080000   1.85912894
  0.22080000   1.85912991
  0.22080000   1.85913020
  0.22080000   1.85913005
  0.22080000   1.85912962
  0.22100000   1.85676050
  0.22100000   1.85861404
  0.22100000   1.85989231
  0.22100000   1.86077079
  0.22100000   1.86137285
  0.22100000   1.86178451
  0.22100000   1.86206535
  0.22100000   1.86225652
  0.22100000   1.86238630
  0.22100000   1.86247414
  0.22100000   1.86253335
  0.22100000   1.86257304
  0.22100000   1.86259946
  0.22100000   1.86261685
  0.22100000   1.86262814
  0.22100000   1.86263530
  0.22100000   1.86263968
  0.22100000   1.86264220
  0.22100000   1.86264349
  0.22100000   1.86264396
  0.22100000   1.86264390
  0.22100000   1.86264351
  0.22100000   1.86264292
  0.22120000   1.86088523
  0.22120000   1.86255844
  0.22120000   1.86370334
  0.22120000   1.86448413
  0.22120000   1.86501518
  0.22120000   1.86537550
  0.22120000   1.86561941
  0.22120000   1.86578411
  0.22120000   1.86589499
  0.22120000   1.86596936
  0.22120000   1.86601900
  0.22120000   1.86605192
  0.22120000   1.86607354
  0.22120000   1.86608755
  0.22120000   1.86609645
  0.22120000   1.86610194
  0.22120000   1.86610515
  0.22120000   1.86610685
  0.22120000   1.86610756
  0.22120000   1.86610764
  0.22120000   1.86610731
  0.22120000   1.86610673
  0.22120000   1.86610600
  0.22140000   1.86489504
  0.22140000   1.86640249
  0.22140000   1.86742589
  0.22140000   1.86811844
  0.22140000   1.86858584
  0.22140000   1.86890052
  0.22140000   1.86911184
  0.22140000   1.86925335
  0.22140000   1.86934780
  0.22140000   1.86941055
  0.22140000   1.86945200
  0.22140000   1.86947914
  0.22140000   1.86949672
  0.22140000   1.86950790
  0.22140000   1.86951482
  0.22140000   1.86951892
  0.22140000   1.86952117
  0.22140000   1.86952220
  0.22140000   1.86952246
  0.22140000   1.86952221
  0.22140000   1.86952167
  0.22140000   1.86952094
  0.22140000   1.86952011
  0.22160000   1.86879670
  0.22160000   1.87015215
  0.22160000   1.87106514
  0.22160000   1.87167815
  0.22160000   1.87208865
  0.22160000   1.87236283
  0.22160000   1.87254545
  0.22160000   1.87266671
  0.22160000   1.87274690
  0.22160000   1.87279964
  0.22160000   1.87283408
  0.22160000   1.87285634
  0.22160000   1.87287050
  0.22160000   1.87287931
  0.22160000   1.87288459
  0.22160000   1.87288756
  0.22160000   1.87288902
  0.22160000   1.87288952
  0.22160000   1.87288940
  0.22160000   1.87288891
  0.22160000   1.87288819
  0.22160000   1.87288734
  0.22160000   1.87288644
  0.22180000   1.87259660
  0.22180000   1.87381301
  0.22180000   1.87462586
  0.22180000   1.87516736
  0.22180000   1.87552709
  0.22180000   1.87576542
  0.22180000   1.87592284
  0.22180000   1.87602643
  0.22180000   1.87609428
  0.22180000   1.87613843
  0.22180000   1.87616690
  0.22180000   1.87618501
  0.22180000   1.87619631
  0.22180000   1.87620315
  0.22180000   1.87620707
  0.22180000   1.87620911
  0.22180000   1.87620993
  0.22180000   1.87620999
  0.22180000   1.87620958
  0.22180000   1.87620889
  0.22180000   1.87620804
  0.22180000   1.87620710
  0.22180000   1.87620614
  0.22200000   1.87630073
  0.22200000   1.87739026
  0.22200000   1.87811251
  0.22200000   1.87858983
  0.22200000   1.87890437
  0.22200000   1.87911104
  0.22200000   1.87924637
  0.22200000   1.87933459
  0.22200000   1.87939179
  0.22200000   1.87942857
  0.22200000   1.87945196
  0.22200000   1.87946658
  0.22200000   1.87947548
  0.22200000   1.87948068
  0.22200000   1.87948348
  0.22200000   1.87948475
  0.22200000   1.87948506
  0.22200000   1.87948477
  0.22200000   1.87948413
  0.22200000   1.87948328
  0.22200000   1.87948232
  0.22200000   1.87948132
  0.22200000   1.87948031
  0.22220000   1.87991475
  0.22220000   1.88088873
  0.22220000   1.88152920
  0.22220000   1.88194905
  0.22220000   1.88222346
  0.22220000   1.88240222
  0.22220000   1.88251822
  0.22220000   1.88259311
  0.22220000   1.88264112
  0.22220000   1.88267161
  0.22220000   1.88269068
  0.22220000   1.88270236
  0.22220000   1.88270927
  0.22220000   1.88271310
  0.22220000   1.88271499
  0.22220000   1.88271564
  0.22220000   1.88271553
  0.22220000   1.88271496
  0.22220000   1.88271413
  0.22220000   1.88271316
  0.22220000   1.88271213
  0.22220000   1.88271107
  0.22220000   1.88271003
  0.22240000   1.88344391
  0.22240000   1.88431291
  0.22240000   1.88487971
  0.22240000   1.88524822
  0.22240000   1.88548705
  0.22240000   1.88564127
  0.22240000   1.88574040
  0.22240000   1.88580374
  0.22240000   1.88584387
  0.22240000   1.88586898
  0.22240000   1.88588441
  0.22240000   1.88589362
  0.22240000   1.88589886
  0.22240000   1.88590157
  0.22240000   1.88590270
  0.22240000   1.88590285
  0.22240000   1.88590241
  0.22240000   1.88590162
  0.22240000   1.88590065
  0.22240000   1.88589958
  0.22240000   1.88589848
  0.22240000   1.88589739
  0.22240000   1.88589633
  0.22260000   1.88689315
  0.22260000   1.88766697
  0.22260000   1.88816754
  0.22260000   1.88849028
  0.22260000   1.88869764
  0.22260000   1.88883033
  0.22260000   1.88891477
  0.22260000   1.88896813
  0.22260000   1.88900150
  0.22260000   1.88902204
  0.22260000   1.88903440
  0.22260000   1.88904154
  0.22260000   1.88904539
  0.22260000   1.88904718
  0.22260000   1.88904770
  0.22260000   1.88904744
  0.22260000   1.88904673
  0.22260000   1.88904577
  0.22260000   1.88904468
  0.22260000   1.88904354
  0.22260000   1.88904240
  0.22260000   1.88904128
  0.22260000   1.88904020
  0.22280000   1.89026705
  0.22280000   1.89095477
  0.22280000   1.89139594
  0.22280000   1.89167795
  0.22280000   1.89185754
  0.22280000   1.89197136
  0.22280000   1.89204305
  0.22280000   1.89208780
  0.22280000   1.89211538
  0.22280000   1.89213205
  0.22280000   1.89214182
  0.22280000   1.89214723
  0.22280000   1.89214994
  0.22280000   1.89215097
  0.22280000   1.89215099
  0.22280000   1.89215040
  0.22280000   1.89214948
  0.22280000   1.89214838
  0.22280000   1.89214720
  0.22280000   1.89214601
  0.22280000   1.89214483
  0.22280000   1.89214369
  0.22280000   1.89214260
  0.22300000   1.89356988
  0.22300000   1.89417987
  0.22300000   1.89456786
  0.22300000   1.89481371
  0.22300000   1.89496884
  0.22300000   1.89506618
  0.22300000   1.89512681
  0.22300000   1.89516416
  0.22300000   1.89518681
  0.22300000   1.89520020
  0.22300000   1.89520778
  0.22300000   1.89521177
  0.22300000   1.89521353
  0.22300000   1.89521394
  0.22300000   1.89521355
  0.22300000   1.89521271
  0.22300000   1.89521162
  0.22300000   1.89521041
  0.22300000   1.89520917
  0.22300000   1.89520793
  0.22300000   1.89520673
  0.22300000   1.89520557
  0.22300000   1.89520448
  0.22320000   1.89680561
  0.22320000   1.89734557
  0.22320000   1.89768605
  0.22320000   1.89789987
  0.22320000   1.89803349
  0.22320000   1.89811646
  0.22320000   1.89816752
  0.22320000   1.89819853
  0.22320000   1.89821697
  0.22320000   1.89822759
  0.22320000   1.89823336
  0.22320000   1.89823615
  0.22320000   1.89823713
  0.22320000   1.89823704
  0.22320000   1.89823633
  0.22320000   1.89823528
  0.22320000   1.89823405
  0.22320000   1.89823276
  0.22320000   1.89823147
  0.22320000   1.89823020
  0.22320000   1.89822898
  0.22320000   1.89822782
  0.22320000   1.89822672
  0.22340000   1.89997790
  0.22340000   1.90045491
  0.22340000   1.90075303
  0.22340000   1.90093852
  0.22340000   1.90105329
  0.22340000   1.90112376
  0.22340000   1.90116656
  0.22340000   1.90119213
  0.22340000   1.90120701
  0.22340000   1.90121530
  0.22340000   1.90121955
  0.22340000   1.90122135
  0.22340000   1.90122170
  0.22340000   1.90122120
  0.22340000   1.90122022
  0.22340000   1.90121901
  0.22340000   1.90121768
  0.22340000   1.90121633
  0.22340000   1.90121500
  0.22340000   1.90121371
  0.22340000   1.90121248
  0.22340000   1.90121131
  0.22340000   1.90121020
  0.22360000   1.90309018
  0.22360000   1.90351069
  0.22360000   1.90377113
  0.22360000   1.90393162
  0.22360000   1.90402989
  0.22360000   1.90408951
  0.22360000   1.90412520
  0.22360000   1.90414612
  0.22360000   1.90415798
  0.22360000   1.90416431
  0.22360000   1.90416730
  0.22360000   1.90416829
  0.22360000   1.90416812
  0.22360000   1.90416729
  0.22360000   1.90416610
  0.22360000   1.90416476
  0.22360000   1.90416335
  0.22360000   1.90416195
  0.22360000   1.90416059
  0.22360000   1.90415929
  0.22360000   1.90415805
  0.22360000   1.90415688
  0.22360000   1.90415577
  0.22380000   1.90614558
  0.22380000   1.90651550
  0.22380000   1.90674248
  0.22380000   1.90688097
  0.22380000   1.90696482
  0.22380000   1.90701503
  0.22380000   1.90704461
  0.22380000   1.90706158
  0.22380000   1.90707089
  0.22380000   1.90707558
  0.22380000   1.90707752
  0.22380000   1.90707785
  0.22380000   1.90707725
  0.22380000   1.90707616
  0.22380000   1.90707481
  0.22380000   1.90707336
  0.22380000   1.90707190
  0.22380000   1.90707046
  0.22380000   1.90706908
  0.22380000   1.90706777
  0.22380000   1.90706653
  0.22380000   1.90706536
  0.22380000   1.90706425
  0.22400000   1.90914703
  0.22400000   1.90947174
  0.22400000   1.90966906
  0.22400000   1.90978820
  0.22400000   1.90985949
  0.22400000   1.90990158
  0.22400000   1.90992593
  0.22400000   1.90993954
  0.22400000   1.90994670
  0.22400000   1.90995002
  0.22400000   1.90995109
  0.22400000   1.90995087
  0.22400000   1.90994994
  0.22400000   1.90994863
  0.22400000   1.90994716
  0.22400000   1.90994563
  0.22400000   1.90994412
  0.22400000   1.90994266
  0.22400000   1.90994127
  0.22400000   1.90993995
  0.22400000   1.90993870
  0.22400000   1.90993753
  0.22400000   1.90993643
  0.22420000   1.91209721
  0.22420000   1.91238159
  0.22420000   1.91255269
  0.22420000   1.91265486
  0.22420000   1.91271523
  0.22420000   1.91275031
  0.22420000   1.91277018
  0.22420000   1.91278094
  0.22420000   1.91278630
  0.22420000   1.91278849
  0.22420000   1.91278884
  0.22420000   1.91278818
  0.22420000   1.91278697
  0.22420000   1.91278549
  0.22420000   1.91278392
  0.22420000   1.91278233
  0.22420000   1.91278079
  0.22420000   1.91277931
  0.22420000   1.91277791
  0.22420000   1.91277659
  0.22420000   1.91277534
  0.22420000   1.91277417
  0.22420000   1.91277307
  0.22440000   1.91499861
  0.22440000   1.91524708
  0.22440000   1.91539504
  0.22440000   1.91548237
  0.22440000   1.91553325
  0.22440000   1.91556231
  0.22440000   1.91557836
  0.22440000   1.91558671
  0.22440000   1.91559056
  0.22440000   1.91559180
  0.22440000   1.91559157
  0.22440000   1.91559054
  0.22440000   1.91558911
  0.22440000   1.91558751
  0.22440000   1.91558585
  0.22440000   1.91558422
  0.22440000   1.91558266
  0.22440000   1.91558117
  0.22440000   1.91557976
  0.22440000   1.91557844
  0.22440000   1.91557719
  0.22440000   1.91557602
  0.22440000   1.91557493
  0.22460000   1.91785351
  0.22460000   1.91807009
  0.22460000   1.91819766
  0.22460000   1.91827202
  0.22460000   1.91831469
  0.22460000   1.91833857
  0.22460000   1.91835138
  0.22460000   1.91835770
  0.22460000   1.91836029
  0.22460000   1.91836075
  0.22460000   1.91836004
  0.22460000   1.91835872
  0.22460000   1.91835712
  0.22460000   1.91835541
  0.22460000   1.91835370
  0.22460000   1.91835204
  0.22460000   1.91835045
  0.22460000   1.91834895
  0.22460000   1.91834754
  0.22460000   1.91834622
  0.22460000   1.91834498
  0.22460000   1.91834381
  0.22460000   1.91834272
  0.22480000   1.92066404
  0.22480000   1.92085233
  0.22480000   1.92096198
  0.22480000   1.92102504
  0.22480000   1.92106062
  0.22480000   1.92108007
  0.22480000   1.92109012
  0.22480000   1.92109474
  0.22480000   1.92109627
  0.22480000   1.92109609
  0.22480000   1.92109499
  0.22480000   1.92109344
  0.22480000   1.92109170
  0.22480000   1.92108991
  0.22480000   1.92108816
  0.22480000   1.92108647
  0.22480000   1.92108487
  0.22480000   1.92108337
  0.22480000   1.92108196
  0.22480000   1.92108064
  0.22480000   1.92107940
  0.22480000   1.92107824
  0.22480000   1.92107715
  0.22500000   1.92343215
  0.22500000   1.92359541
  0.22500000   1.92368933
  0.22500000   1.92374256
  0.22500000   1.92377203
  0.22500000   1.92378770
  0.22500000   1.92379541
  0.22500000   1.92379860
  0.22500000   1.92379926
  0.22500000   1.92379855
  0.22500000   1.92379714
  0.22500000   1.92379541
  0.22500000   1.92379356
  0.22500000   1.92379171
  0.22500000   1.92378992
  0.22500000   1.92378822
  0.22500000   1.92378661
  0.22500000   1.92378511
  0.22500000   1.92378370
  0.22500000   1.92378238
  0.22500000   1.92378115
  0.22500000   1.92377999
  0.22500000   1.92377890
  0.22520000   1.92615963
  0.22520000   1.92630078
  0.22520000   1.92638093
  0.22520000   1.92642564
  0.22520000   1.92644985
  0.22520000   1.92646229
  0.22520000   1.92646804
  0.22520000   1.92647003
  0.22520000   1.92646997
  0.22520000   1.92646884
  0.22520000   1.92646717
  0.22520000   1.92646529
  0.22520000   1.92646335
  0.22520000   1.92646146
  0.22520000   1.92645965
  0.22520000   1.92645793
  0.22520000   1.92645633
  0.22520000   1.92645483
  0.22520000   1.92645342
  0.22520000   1.92645211
  0.22520000   1.92645088
  0.22520000   1.92644972
  0.22520000   1.92644864
  0.22540000   1.92884815
  0.22540000   1.92896981
  0.22540000   1.92903794
  0.22540000   1.92907526
  0.22540000   1.92909496
  0.22540000   1.92910466
  0.22540000   1.92910875
  0.22540000   1.92910975
  0.22540000   1.92910910
  0.22540000   1.92910761
  0.22540000   1.92910574
  0.22540000   1.92910374
  0.22540000   1.92910175
  0.22540000   1.92909982
  0.22540000   1.92909799
  0.22540000   1.92909627
  0.22540000   1.92909467
  0.22540000   1.92909316
  0.22540000   1.92909176
  0.22540000   1.92909045
  0.22540000   1.92908923
  0.22540000   1.92908808
  0.22540000   1.92908699
  0.22560000   1.93149925
  0.22560000   1.93160376
  0.22560000   1.93166140
  0.22560000   1.93169234
  0.22560000   1.93170818
  0.22560000   1.93171556
  0.22560000   1.93171826
  0.22560000   1.93171843
  0.22560000   1.93171729
  0.22560000   1.93171553
  0.22560000   1.93171350
  0.22560000   1.93171141
  0.22560000   1.93170936
  0.22560000   1.93170741
  0.22560000   1.93170557
  0.22560000   1.93170385
  0.22560000   1.93170225
  0.22560000   1.93170075
  0.22560000   1.93169935
  0.22560000   1.93169805
  0.22560000   1.93169682
  0.22560000   1.93169568
  0.22560000   1.93169460
  0.22580000   1.93411434
  0.22580000   1.93420379
  0.22580000   1.93425231
  0.22580000   1.93427776
  0.22580000   1.93429030
  0.22580000   1.93429571
  0.22580000   1.93429725
  0.22580000   1.93429674
  0.22580000   1.93429521
  0.22580000   1.93429321
  0.22580000   1.93429106
  0.22580000   1.93428890
  0.22580000   1.93428682
  0.22580000   1.93428485
  0.22580000   1.93428301
  0.22580000   1.93428129
  0.22580000   1.93427968
  0.22580000   1.93427819
  0.22580000   1.93427680
  0.22580000   1.93427550
  0.22580000   1.93427428
  0.22580000   1.93427313
  0.22580000   1.93427206
  0.22600000   1.93669474
  0.22600000   1.93677100
  0.22600000   1.93681160
  0.22600000   1.93683231
  0.22600000   1.93684205
  0.22600000   1.93684580
  0.22600000   1.93684637
  0.22600000   1.93684530
  0.22600000   1.93684345
  0.22600000   1.93684127
  0.22600000   1.93683902
  0.22600000   1.93683681
  0.22600000   1.93683471
  0.22600000   1.93683273
  0.22600000   1.93683088
  0.22600000   1.93682916
  0.22600000   1.93682756
  0.22600000   1.93682608
  0.22600000   1.93682469
  0.22600000   1.93682339
  0.22600000   1.93682217
  0.22600000   1.93682103
  0.22600000   1.93681996
  0.22620000   1.93924166
  0.22620000   1.93930638
  0.22620000   1.93934012
  0.22620000   1.93935678
  0.22620000   1.93936413
  0.22620000   1.93936649
  0.22620000   1.93936626
  0.22620000   1.93936473
  0.22620000   1.93936261
  0.22620000   1.93936030
  0.22620000   1.93935797
  0.22620000   1.93935572
  0.22620000   1.93935360
  0.22620000   1.93935162
  0.22620000   1.93934977
  0.22620000   1.93934806
  0.22620000   1.93934646
  0.22620000   1.93934498
  0.22620000   1.93934359
  0.22620000   1.93934230
  0.22620000   1.93934109
  0.22620000   1.93933995
  0.22620000   1.93933888
  0.22640000   1.94175623
  0.22640000   1.94181088
  0.22640000   1.94183869
  0.22640000   1.94185188
  0.22640000   1.94185721
  0.22640000   1.94185841
  0.22640000   1.94185751
  0.22640000   1.94185560
  0.22640000   1.94185328
  0.22640000   1.94185085
  0.22640000   1.94184847
  0.22640000   1.94184619
  0.22640000   1.94184406
  0.22640000   1.94184207
  0.22640000   1.94184023
  0.22640000   1.94183852
  0.22640000   1.94183693
  0.22640000   1.94183545
  0.22640000   1.94183407
  0.22640000   1.94183278
  0.22640000   1.94183157
  0.22640000   1.94183044
  0.22640000   1.94182937
  0.22660000   1.94423949
  0.22660000   1.94428538
  0.22660000   1.94430807
  0.22660000   1.94431829
  0.22660000   1.94432192
  0.22660000   1.94432215
  0.22660000   1.94432070
  0.22660000   1.94431849
  0.22660000   1.94431601
  0.22660000   1.94431349
  0.22660000   1.94431106
  0.22660000   1.94430877
  0.22660000   1.94430663
  0.22660000   1.94430465
  0.22660000   1.94430281
  0.22660000   1.94430110
  0.22660000   1.94429952
  0.22660000   1.94429804
  0.22660000   1.94429667
  0.22660000   1.94429538
  0.22660000   1.94429418
  0.22660000   1.94429305
  0.22660000   1.94429198
  0.22680000   1.94669241
  0.22680000   1.94673069
  0.22680000   1.94674898
  0.22680000   1.94675668
  0.22680000   1.94675888
  0.22680000   1.94675829
  0.22680000   1.94675639
  0.22680000   1.94675394
  0.22680000   1.94675133
  0.22680000   1.94674875
  0.22680000   1.94674629
  0.22680000   1.94674398
  0.22680000   1.94674184
  0.22680000   1.94673986
  0.22680000   1.94673803
  0.22680000   1.94673633
  0.22680000   1.94673475
  0.22680000   1.94673328
  0.22680000   1.94673191
  0.22680000   1.94673063
  0.22680000   1.94672942
  0.22680000   1.94672830
  0.22680000   1.94672723
  0.22700000   1.94911591
  0.22700000   1.94914758
  0.22700000   1.94916210
  0.22700000   1.94916766
  0.22700000   1.94916865
  0.22700000   1.94916740
  0.22700000   1.94916513
  0.22700000   1.94916248
  0.22700000   1.94915977
  0.22700000   1.94915714
  0.22700000   1.94915466
  0.22700000   1.94915235
  0.22700000   1.94915021
  0.22700000   1.94914823
  0.22700000   1.94914640
  0.22700000   1.94914471
  0.22700000   1.94914314
  0.22700000   1.94914167
  0.22700000   1.94914030
  0.22700000   1.94913903
  0.22700000   1.94913783
  0.22700000   1.94913670
  0.22700000   1.94913564
  0.22720000   1.95151082
  0.22720000   1.95153678
  0.22720000   1.95154807
  0.22720000   1.95155182
  0.22720000   1.95155180
  0.22720000   1.95155000
  0.22720000   1.95154743
  0.22720000   1.95154463
  0.22720000   1.95154184
  0.22720000   1.95153917
  0.22720000   1.95153668
  0.22720000   1.95153437
  0.22720000   1.95153223
  0.22720000   1.95153026
  0.22720000   1.95152844
  0.22720000   1.95152675
  0.22720000   1.95152518
  0.22720000   1.95152372
  0.22720000   1.95152236
  0.22720000   1.95152108
  0.22720000   1.95151989
  0.22720000   1.95151876
  0.22720000   1.95151770
  0.22740000   1.95387794
  0.22740000   1.95389897
  0.22740000   1.95390750
  0.22740000   1.95390971
  0.22740000   1.95390886
  0.22740000   1.95390660
  0.22740000   1.95390380
  0.22740000   1.95390088
  0.22740000   1.95389802
  0.22740000   1.95389533
  0.22740000   1.95389283
  0.22740000   1.95389052
  0.22740000   1.95388839
  0.22740000   1.95388643
  0.22740000   1.95388461
  0.22740000   1.95388293
  0.22740000   1.95388137
  0.22740000   1.95387991
  0.22740000   1.95387855
  0.22740000   1.95387728
  0.22740000   1.95387609
  0.22740000   1.95387497
  0.22740000   1.95387391
  0.22760000   1.95621799
  0.22760000   1.95623478
  0.22760000   1.95624096
  0.22760000   1.95624189
  0.22760000   1.95624034
  0.22760000   1.95623772
  0.22760000   1.95623473
  0.22760000   1.95623171
  0.22760000   1.95622881
  0.22760000   1.95622611
  0.22760000   1.95622360
  0.22760000   1.95622129
  0.22760000   1.95621917
  0.22760000   1.95621721
  0.22760000   1.95621540
  0.22760000   1.95621373
  0.22760000   1.95621217
  0.22760000   1.95621072
  0.22760000   1.95620936
  0.22760000   1.95620809
  0.22760000   1.95620690
  0.22760000   1.95620578
  0.22760000   1.95620473
  0.22780000   1.95853168
  0.22780000   1.95854483
  0.22780000   1.95854901
  0.22780000   1.95854887
  0.22780000   1.95854674
  0.22780000   1.95854382
  0.22780000   1.95854068
  0.22780000   1.95853759
  0.22780000   1.95853466
  0.22780000   1.95853195
  0.22780000   1.95852944
  0.22780000   1.95852714
  0.22780000   1.95852502
  0.22780000   1.95852307
  0.22780000   1.95852127
  0.22780000   1.95851960
  0.22780000   1.95851805
  0.22780000   1.95851660
  0.22780000   1.95851525
  0.22780000   1.95851398
  0.22780000   1.95851279
  0.22780000   1.95851168
  0.22780000   1.95851062
  0.22800000   1.96081966
  0.22800000   1.96082968
  0.22800000   1.96083219
  0.22800000   1.96083114
  0.22800000   1.96082854
  0.22800000   1.96082538
  0.22800000   1.96082212
  0.22800000   1.96081897
  0.22800000   1.96081603
  0.22800000   1.96081331
  0.22800000   1.96081081
  0.22800000   1.96080852
  0.22800000   1.96080641
  0.22800000   1.96080446
  0.22800000   1.96080266
  0.22800000   1.96080100
  0.22800000   1.96079945
  0.22800000   1.96079801
  0.22800000   1.96079666
  0.22800000   1.96079540
  0.22800000   1.96079421
  0.22800000   1.96079310
  0.22800000   1.96079204
  0.22820000   1.96308254
  0.22820000   1.96308990
  0.22820000   1.96309098
  0.22820000   1.96308918
  0.22820000   1.96308620
  0.22820000   1.96308284
  0.22820000   1.96307949
  0.22820000   1.96307631
  0.22820000   1.96307335
  0.22820000   1.96307063
  0.22820000   1.96306814
  0.22820000   1.96306585
  0.22820000   1.96306375
  0.22820000   1.96306181
  0.22820000   1.96306002
  0.22820000   1.96305836
  0.22820000   1.96305682
  0.22820000   1.96305538
  0.22820000   1.96305404
  0.22820000   1.96305278
  0.22820000   1.96305159
  0.22820000   1.96305048
  0.22820000   1.96304943
  0.22840000   1.96532090
  0.22840000   1.96532598
  0.22840000   1.96532587
  0.22840000   1.96532346
  0.22840000   1.96532016
  0.22840000   1.96531665
  0.22840000   1.96531323
  0.22840000   1.96531002
  0.22840000   1.96530706
  0.22840000   1.96530435
  0.22840000   1.96530186
  0.22840000   1.96529958
  0.22840000   1.96529749
  0.22840000   1.96529556
  0.22840000   1.96529377
  0.22840000   1.96529212
  0.22840000   1.96529058
  0.22840000   1.96528914
  0.22840000   1.96528780
  0.22840000   1.96528654
  0.22840000   1.96528536
  0.22840000   1.96528425
  0.22840000   1.96528320
  0.22860000   1.96753529
  0.22860000   1.96753845
  0.22860000   1.96753733
  0.22860000   1.96753441
  0.22860000   1.96753086
  0.22860000   1.96752723
  0.22860000   1.96752376
  0.22860000   1.96752054
  0.22860000   1.96751757
  0.22860000   1.96751486
  0.22860000   1.96751239
  0.22860000   1.96751012
  0.22860000   1.96750803
  0.22860000   1.96750611
  0.22860000   1.96750433
  0.22860000   1.96750268
  0.22860000   1.96750114
  0.22860000   1.96749971
  0.22860000   1.96749837
  0.22860000   1.96749712
  0.22860000   1.96749594
  0.22860000   1.96749483
  0.22860000   1.96749378
  0.22880000   1.96972623
  0.22880000   1.96972775
  0.22880000   1.96972580
  0.22880000   1.96972246
  0.22880000   1.96971871
  0.22880000   1.96971500
  0.22880000   1.96971149
  0.22880000   1.96970826
  0.22880000   1.96970530
  0.22880000   1.96970259
  0.22880000   1.96970012
  0.22880000   1.96969786
  0.22880000   1.96969578
  0.22880000   1.96969387
  0.22880000   1.96969210
  0.22880000   1.96969045
  0.22880000   1.96968892
  0.22880000   1.96968749
  0.22880000   1.96968615
  0.22880000   1.96968490
  0.22880000   1.96968372
  0.22880000   1.96968261
  0.22880000   1.96968157
  0.22900000   1.97189421
  0.22900000   1.97189436
  0.22900000   1.97189172
  0.22900000   1.97188804
  0.22900000   1.97188413
  0.22900000   1.97188035
  0.22900000   1.97187682
  0.22900000   1.97187358
  0.22900000   1.97187062
  0.22900000   1.97186793
  0.22900000   1.97186547
  0.22900000   1.97186322
  0.22900000   1.97186115
  0.22900000   1.97185924
  0.22900000   1.97185747
  0.22900000   1.97185583
  0.22900000   1.97185430
  0.22900000   1.97185288
  0.22900000   1.97185154
  0.22900000   1.97185029
  0.22900000   1.97184911
  0.22900000   1.97184801
  0.22900000   1.97184696
  0.22920000   1.97403971
  0.22920000   1.97403870
  0.22920000   1.97403549
  0.22920000   1.97403153
  0.22920000   1.97402750
  0.22920000   1.97402367
  0.22920000   1.97402013
  0.22920000   1.97401689
  0.22920000   1.97401394
  0.22920000   1.97401126
  0.22920000   1.97400881
  0.22920000   1.97400656
  0.22920000   1.97400450
  0.22920000   1.97400260
  0.22920000   1.97400084
  0.22920000   1.97399920
  0.22920000   1.97399768
  0.22920000   1.97399625
  0.22920000   1.97399492
  0.22920000   1.97399367
  0.22920000   1.97399250
  0.22920000   1.97399139
  0.22920000   1.97399034
  0.22940000   1.97616317
  0.22940000   1.97616120
  0.22940000   1.97615751
  0.22940000   1.97615334
  0.22940000   1.97614922
  0.22940000   1.97614535
  0.22940000   1.97614180
  0.22940000   1.97613857
  0.22940000   1.97613563
  0.22940000   1.97613296
  0.22940000   1.97613052
  0.22940000   1.97612828
  0.22940000   1.97612622
  0.22940000   1.97612433
  0.22940000   1.97612257
  0.22940000   1.97612094
  0.22940000   1.97611942
  0.22940000   1.97611800
  0.22940000   1.97611667
  0.22940000   1.97611542
  0.22940000   1.97611425
  0.22940000   1.97611314
  0.22940000   1.97611209
  0.22960000   1.97826503
  0.22960000   1.97826225
  0.22960000   1.97825818
  0.22960000   1.97825384
  0.22960000   1.97824965
  0.22960000   1.97824575
  0.22960000   1.97824220
  0.22960000   1.97823898
  0.22960000   1.97823605
  0.22960000   1.97823339
  0.22960000   1.97823096
  0.22960000   1.97822873
  0.22960000   1.97822668
  0.22960000   1.97822479
  0.22960000   1.97822304
  0.22960000   1.97822141
  0.22960000   1.97821989
  0.22960000   1.97821848
  0.22960000   1.97821715
  0.22960000   1.97821590
  0.22960000   1.97821473
  0.22960000   1.97821362
  0.22960000   1.97821258
  0.22980000   1.98034570
  0.22980000   1.98034226
  0.22980000   1.98033788
  0.22980000   1.98033340
  0.22980000   1.98032915
  0.22980000   1.98032525
  0.22980000   1.98032170
  0.22980000   1.98031848
  0.22980000   1.98031557
  0.22980000   1.98031292
  0.22980000   1.98031050
  0.22980000   1.98030828
  0.22980000   1.98030623
  0.22980000   1.98030435
  0.22980000   1.98030260
  0.22980000   1.98030098
  0.22980000   1.98029946
  0.22980000   1.98029805
  0.22980000   1.98029672
  0.22980000   1.98029548
  0.22980000   1.98029431
  0.22980000   1.98029320
  0.22980000   1.98029216
  0.23000000   1.98240558
  0.23000000   1.98240158
  0.23000000   1.98239695
  0.23000000   1.98239237
  0.23000000   1.98238808
  0.23000000   1.98238418
  0.23000000   1.98238063
  0.23000000   1.98237743
  0.23000000   1.98237453
  0.23000000   1.98237189
  0.23000000   1.98236948
  0.23000000   1.98236727
  0.23000000   1.98236523
  0.23000000   1.98236335
  0.23000000   1.98236161
  0.23000000   1.98235998
  0.23000000   1.98235847
  0.23000000   1.98235706
  0.23000000   1.98235574
  0.23000000   1.98235449
  0.23000000   1.98235332
  0.23000000   1.98235222
  0.23000000   1.98235118
  0.23020000   1.98444504
  0.23020000   1.98444059
  0.23020000   1.98443576
  0.23020000   1.98443110
  0.23020000   1.98442679
  0.23020000   1.98442289
  0.23020000   1.98441936
  0.23020000   1.98441617
  0.23020000   1.98441327
  0.23020000   1.98441064
  0.23020000   1.98440824
  0.23020000   1.98440604
  0.23020000   1.98440401
  0.23020000   1.98440213
  0.23020000   1.98440039
  0.23020000   1.98439878
  0.23020000   1.98439727
  0.23020000   1.98439586
  0.23020000   1.98439453
  0.23020000   1.98439329
  0.23020000   1.98439212
  0.23020000   1.98439102
  0.23020000   1.98438998
  0.23040000   1.98646445
  0.23040000   1.98645963
  0.23040000   1.98645465
  0.23040000   1.98644993
  0.23040000   1.98644562
  0.23040000   1.98644171
  0.23040000   1.98643819
  0.23040000   1.98643502
  0.23040000   1.98643214
  0.23040000   1.98642952
  0.23040000   1.98642712
  0.23040000   1.98642493
  0.23040000   1.98642290
  0.23040000   1.98642103
  0.23040000   1.98641930
  0.23040000   1.98641768
  0.23040000   1.98641618
  0.23040000   1.98641477
  0.23040000   1.98641345
  0.23040000   1.98641221
  0.23040000   1.98641104
  0.23040000   1.98640994
  0.23040000   1.98640889
  0.23060000   1.98846417
  0.23060000   1.98845905
  0.23060000   1.98845395
  0.23060000   1.98844920
  0.23060000   1.98844487
  0.23060000   1.98844098
  0.23060000   1.98843748
  0.23060000   1.98843431
  0.23060000   1.98843144
  0.23060000   1.98842884
  0.23060000   1.98842645
  0.23060000   1.98842426
  0.23060000   1.98842224
  0.23060000   1.98842038
  0.23060000   1.98841865
  0.23060000   1.98841703
  0.23060000   1.98841553
  0.23060000   1.98841412
  0.23060000   1.98841280
  0.23060000   1.98841156
  0.23060000   1.98841040
  0.23060000   1.98840929
  0.23060000   1.98840825
  0.23080000   1.99044453
  0.23080000   1.99043918
  0.23080000   1.99043399
  0.23080000   1.99042921
  0.23080000   1.99042489
  0.23080000   1.99042101
  0.23080000   1.99041752
  0.23080000   1.99041437
  0.23080000   1.99041151
  0.23080000   1.99040891
  0.23080000   1.99040654
  0.23080000   1.99040435
  0.23080000   1.99040234
  0.23080000   1.99040048
  0.23080000   1.99039875
  0.23080000   1.99039714
  0.23080000   1.99039564
  0.23080000   1.99039424
  0.23080000   1.99039292
  0.23080000   1.99039168
  0.23080000   1.99039051
  0.23080000   1.99038941
  0.23080000   1.99038837
  0.23100000   1.99240588
  0.23100000   1.99240034
  0.23100000   1.99239508
  0.23100000   1.99239029
  0.23100000   1.99238598
  0.23100000   1.99238211
  0.23100000   1.99237863
  0.23100000   1.99237550
  0.23100000   1.99237265
  0.23100000   1.99237006
  0.23100000   1.99236769
  0.23100000   1.99236552
  0.23100000   1.99236351
  0.23100000   1.99236165
  0.23100000   1.99235993
  0.23100000   1.99235832
  0.23100000   1.99235682
  0.23100000   1.99235542
  0.23100000   1.99235410
  0.23100000   1.99235286
  0.23100000   1.99235170
  0.23100000   1.99235059
  0.23100000   1.99234955
  0.23120000   1.99434852
  0.23120000   1.99434283
  0.23120000   1.99433753
  0.23120000   1.99433274
  0.23120000   1.99432843
  0.23120000   1.99432458
  0.23120000   1.99432112
  0.23120000   1.99431800
  0.23120000   1.99431517
  0.23120000   1.99431259
  0.23120000   1.99431023
  0.23120000   1.99430805
  0.23120000   1.99430605
  0.23120000   1.99430420
  0.23120000   1.99430248
  0.23120000   1.99430087
  0.23120000   1.99429938
  0.23120000   1.99429797
  0.23120000   1.99429666
  0.23120000   1.99429542
  0.23120000   1.99429425
  0.23120000   1.99429315
  0.23120000   1.99429211
  0.23140000   1.99627277
  0.23140000   1.99626697
  0.23140000   1.99626164
  0.23140000   1.99625685
  0.23140000   1.99625256
  0.23140000   1.99624873
  0.23140000   1.99624528
  0.23140000   1.99624217
  0.23140000   1.99623935
  0.23140000   1.99623678
  0.23140000   1.99623443
  0.23140000   1.99623226
  0.23140000   1.99623026
  0.23140000   1.99622841
  0.23140000   1.99622670
  0.23140000   1.99622509
  0.23140000   1.99622360
  0.23140000   1.99622220
  0.23140000   1.99622088
  0.23140000   1.99621964
  0.23140000   1.99621848
  0.23140000   1.99621738
  0.23140000   1.99621634
  0.23160000   1.99817893
  0.23160000   1.99817306
  0.23160000   1.99816771
  0.23160000   1.99816292
  0.23160000   1.99815865
  0.23160000   1.99815483
  0.23160000   1.99815141
  0.23160000   1.99814831
  0.23160000   1.99814550
  0.23160000   1.99814294
  0.23160000   1.99814059
  0.23160000   1.99813843
  0.23160000   1.99813644
  0.23160000   1.99813459
  0.23160000   1.99813287
  0.23160000   1.99813127
  0.23160000   1.99812978
  0.23160000   1.99812838
  0.23160000   1.99812707
  0.23160000   1.99812583
  0.23160000   1.99812466
  0.23160000   1.99812356
  0.23160000   1.99812252
  0.23180000   2.00006730
  0.23180000   2.00006136
  0.23180000   2.00005601
  0.23180000   2.00005124
  0.23180000   2.00004699
  0.23180000   2.00004319
  0.23180000   2.00003977
  0.23180000   2.00003669
  0.23180000   2.00003389
  0.23180000   2.00003133
  0.23180000   2.00002899
  0.23180000   2.00002684
  0.23180000   2.00002485
  0.23180000   2.00002301
  0.23180000   2.00002129
  0.23180000   2.00001970
  0.23180000   2.00001820
  0.23180000   2.00001680
  0.23180000   2.00001549
  0.23180000   2.00001425
  0.23180000   2.00001309
  0.23180000   2.00001199
  0.23180000   2.00001095
  0.23200000   2.00193815
  0.23200000   2.00193218
  0.23200000   2.00192683
  0.23200000   2.00192208
  0.23200000   2.00191784
  0.23200000   2.00191406
  0.23200000   2.00191066
  0.23200000   2.00190759
  0.23200000   2.00190480
  0.23200000   2.00190225
  0.23200000   2.00189992
  0.23200000   2.00189777
  0.23200000   2.00189578
  0.23200000   2.00189394
  0.23200000   2.00189223
  0.23200000   2.00189064
  0.23200000   2.00188914
  0.23200000   2.00188775
  0.23200000   2.00188643
  0.23200000   2.00188520
  0.23200000   2.00188403
  0.23200000   2.00188293
  0.23200000   2.00188189
  0.23220000   2.00379177
  0.23220000   2.00378578
  0.23220000   2.00378044
  0.23220000   2.00377570
  0.23220000   2.00377149
  0.23220000   2.00376772
  0.23220000   2.00376434
  0.23220000   2.00376128
  0.23220000   2.00375850
  0.23220000   2.00375596
  0.23220000   2.00375363
  0.23220000   2.00375149
  0.23220000   2.00374951
  0.23220000   2.00374767
  0.23220000   2.00374596
  0.23220000   2.00374437
  0.23220000   2.00374288
  0.23220000   2.00374148
  0.23220000   2.00374017
  0.23220000   2.00373893
  0.23220000   2.00373777
  0.23220000   2.00373667
  0.23220000   2.00373562
  0.23240000   2.00562843
  0.23240000   2.00562243
  0.23240000   2.00561711
  0.23240000   2.00561239
  0.23240000   2.00560820
  0.23240000   2.00560445
  0.23240000   2.00560108
  0.23240000   2.00559803
  0.23240000   2.00559526
  0.23240000   2.00559272
  0.23240000   2.00559040
  0.23240000   2.00558826
  0.23240000   2.00558628
  0.23240000   2.00558445
  0.23240000   2.00558274
  0.23240000   2.00558115
  0.23240000   2.00557966
  0.23240000   2.00557827
  0.23240000   2.00557695
  0.23240000   2.00557572
  0.23240000   2.00557455
  0.23240000   2.00557345
  0.23240000   2.00557241
  0.23260000   2.00744839
  0.23260000   2.00744239
  0.23260000   2.00743709
  0.23260000   2.00743239
  0.23260000   2.00742822
  0.23260000   2.00742448
  0.23260000   2.00742113
  0.23260000   2.00741809
  0.23260000   2.00741533
  0.23260000   2.00741280
  0.23260000   2.00741048
  0.23260000   2.00740835
  0.23260000   2.00740637
  0.23260000   2.00740454
  0.23260000   2.00740284
  0.23260000   2.00740125
  0.23260000   2.00739976
  0.23260000   2.00739836
  0.23260000   2.00739705
  0.23260000   2.00739582
  0.23260000   2.00739465
  0.23260000   2.00739355
  0.23260000   2.00739251
  0.23280000   2.00925191
  0.23280000   2.00924592
  0.23280000   2.00924063
  0.23280000   2.00923596
  0.23280000   2.00923181
  0.23280000   2.00922809
  0.23280000   2.00922475
  0.23280000   2.00922172
  0.23280000   2.00921897
  0.23280000   2.00921645
  0.23280000   2.00921413
  0.23280000   2.00921200
  0.23280000   2.00921003
  0.23280000   2.00920820
  0.23280000   2.00920650
  0.23280000   2.00920491
  0.23280000   2.00920342
  0.23280000   2.00920203
  0.23280000   2.00920072
  0.23280000   2.00919948
  0.23280000   2.00919832
  0.23280000   2.00919722
  0.23280000   2.00919618
  0.23300000   2.01103924
  0.23300000   2.01103326
  0.23300000   2.01102800
  0.23300000   2.01102335
  0.23300000   2.01101921
  0.23300000   2.01101551
  0.23300000   2.01101218
  0.23300000   2.01100917
  0.23300000   2.01100642
  0.23300000   2.01100391
  0.23300000   2.01100160
  0.23300000   2.01099947
  0.23300000   2.01099750
  0.23300000   2.01099568
  0.23300000   2.01099398
  0.23300000   2.01099239
  0.23300000   2.01099090
  0.23300000   2.01098951
  0.23300000   2.01098820
  0.23300000   2.01098696
  0.23300000   2.01098580
  0.23300000   2.01098470
  0.23300000   2.01098365
  0.23320000   2.01281062
  0.23320000   2.01280466
  0.23320000   2.01279942
  0.23320000   2.01279479
  0.23320000   2.01279068
  0.23320000   2.01278700
  0.23320000   2.01278368
  0.23320000   2.01278067
  0.23320000   2.01277793
  0.23320000   2.01277543
  0.23320000   2.01277312
  0.23320000   2.01277100
  0.23320000   2.01276903
  0.23320000   2.01276721
  0.23320000   2.01276551
  0.23320000   2.01276392
  0.23320000   2.01276244
  0.23320000   2.01276104
  0.23320000   2.01275973
  0.23320000   2.01275850
  0.23320000   2.01275733
  0.23320000   2.01275623
  0.23320000   2.01275519
  0.23340000   2.01456629
  0.23340000   2.01456036
  0.23340000   2.01455514
  0.23340000   2.01455054
[truncated: 205,375 more chars]
