# Supplementary material for: Bifurcations of a New Fractional-Order System with a One-Scroll Chaotic Attractor
Source: Hindawi journal article supplement (doi:10.1155/2019/8341514), 2019-01-01
Supplement: f1 [file 8341514.f1.zip › 8341514.f1/a-bifurcationdata/adataq095.dat]

  0.10000000   0.00271142
  0.10000000   0.00213109
  0.10000000   0.00167499
  0.10000000   0.00131652
  0.10000000   0.00103479
  0.10000000   0.00081336
  0.10000000   0.00063933
  0.10000000   0.00050255
  0.10000000   0.00039504
  0.10000000   0.00031055
  0.10000000   0.00024414
  0.10000000   0.00019194
  0.10000000   0.00015092
  0.10000000   0.00011867
  0.10000000   0.00009333
  0.10000000   0.00007341
  0.10000000   0.00005775
  0.10000000   0.00004544
  0.10000000   0.00003576
  0.10000000   0.00002815
  0.10000000   0.00002217
  0.10000000   0.00001747
  0.10000000   0.00001377
  0.10000000   0.00001087
  0.10020000   0.00275520
  0.10020000   0.00216693
  0.10020000   0.00170428
  0.10020000   0.00134043
  0.10020000   0.00105427
  0.10020000   0.00082922
  0.10020000   0.00065222
  0.10020000   0.00051302
  0.10020000   0.00040354
  0.10020000   0.00031744
  0.10020000   0.00024972
  0.10020000   0.00019646
  0.10020000   0.00015457
  0.10020000   0.00012162
  0.10020000   0.00009571
  0.10020000   0.00007533
  0.10020000   0.00005929
  0.10020000   0.00004668
  0.10020000   0.00003676
  0.10020000   0.00002896
  0.10020000   0.00002282
  0.10020000   0.00001799
  0.10020000   0.00001419
  0.10020000   0.00001120
  0.10040000   0.00279969
  0.10040000   0.00220337
  0.10040000   0.00173409
  0.10040000   0.00136477
  0.10040000   0.00107412
  0.10040000   0.00084539
  0.10040000   0.00066538
  0.10040000   0.00052371
  0.10040000   0.00041222
  0.10040000   0.00032448
  0.10040000   0.00025543
  0.10040000   0.00020108
  0.10040000   0.00015831
  0.10040000   0.00012464
  0.10040000   0.00009815
  0.10040000   0.00007730
  0.10040000   0.00006088
  0.10040000   0.00004797
  0.10040000   0.00003780
  0.10040000   0.00002979
  0.10040000   0.00002349
  0.10040000   0.00001853
  0.10040000   0.00001463
  0.10040000   0.00001155
  0.10060000   0.00284489
  0.10060000   0.00224043
  0.10060000   0.00176442
  0.10060000   0.00138956
  0.10060000   0.00109435
  0.10060000   0.00086188
  0.10060000   0.00067880
  0.10060000   0.00053463
  0.10060000   0.00042109
  0.10060000   0.00033168
  0.10060000   0.00026126
  0.10060000   0.00020581
  0.10060000   0.00016214
  0.10060000   0.00012774
  0.10060000   0.00010065
  0.10060000   0.00007932
  0.10060000   0.00006252
  0.10060000   0.00004928
  0.10060000   0.00003886
  0.10060000   0.00003065
  0.10060000   0.00002418
  0.10060000   0.00001909
  0.10060000   0.00001507
  0.10060000   0.00001191
  0.10080000   0.00289083
  0.10080000   0.00227811
  0.10080000   0.00179527
  0.10080000   0.00141479
  0.10080000   0.00111496
  0.10080000   0.00087869
  0.10080000   0.00069250
  0.10080000   0.00054578
  0.10080000   0.00043015
  0.10080000   0.00033904
  0.10080000   0.00026724
  0.10080000   0.00021065
  0.10080000   0.00016606
  0.10080000   0.00013092
  0.10080000   0.00010322
  0.10080000   0.00008140
  0.10080000   0.00006419
  0.10080000   0.00005064
  0.10080000   0.00003995
  0.10080000   0.00003153
  0.10080000   0.00002489
  0.10080000   0.00001966
  0.10080000   0.00001553
  0.10080000   0.00001228
  0.10100000   0.00293751
  0.10100000   0.00231642
  0.10100000   0.00182667
  0.10100000   0.00144049
  0.10100000   0.00113596
  0.10100000   0.00089583
  0.10100000   0.00070647
  0.10100000   0.00055715
  0.10100000   0.00043941
  0.10100000   0.00034656
  0.10100000   0.00027334
  0.10100000   0.00021561
  0.10100000   0.00017008
  0.10100000   0.00013417
  0.10100000   0.00010586
  0.10100000   0.00008353
  0.10100000   0.00006592
  0.10100000   0.00005203
  0.10100000   0.00004108
  0.10100000   0.00003244
  0.10100000   0.00002562
  0.10100000   0.00002025
  0.10100000   0.00001601
  0.10100000   0.00001266
  0.10120000   0.00298494
  0.10120000   0.00235538
  0.10120000   0.00185862
  0.10120000   0.00146665
  0.10120000   0.00115735
  0.10120000   0.00091330
  0.10120000   0.00072073
  0.10120000   0.00056877
  0.10120000   0.00044887
  0.10120000   0.00035425
  0.10120000   0.00027959
  0.10120000   0.00022068
  0.10120000   0.00017419
  0.10120000   0.00013751
  0.10120000   0.00010856
  0.10120000   0.00008571
  0.10120000   0.00006769
  0.10120000   0.00005346
  0.10120000   0.00004223
  0.10120000   0.00003337
  0.10120000   0.00002638
  0.10120000   0.00002086
  0.10120000   0.00001650
  0.10120000   0.00001306
  0.10140000   0.00303315
  0.10140000   0.00239500
  0.10140000   0.00189113
  0.10140000   0.00149329
  0.10140000   0.00117915
  0.10140000   0.00093112
  0.10140000   0.00073527
  0.10140000   0.00058063
  0.10140000   0.00045853
  0.10140000   0.00036211
  0.10140000   0.00028598
  0.10140000   0.00022587
  0.10140000   0.00017840
  0.10140000   0.00014092
  0.10140000   0.00011133
  0.10140000   0.00008796
  0.10140000   0.00006950
  0.10140000   0.00005493
  0.10140000   0.00004342
  0.10140000   0.00003433
  0.10140000   0.00002715
  0.10140000   0.00002148
  0.10140000   0.00001700
  0.10140000   0.00001347
  0.10160000   0.00308213
  0.10160000   0.00243528
  0.10160000   0.00192421
  0.10160000   0.00152041
  0.10160000   0.00120136
  0.10160000   0.00094928
  0.10160000   0.00075011
  0.10160000   0.00059273
  0.10160000   0.00046839
  0.10160000   0.00037015
  0.10160000   0.00029252
  0.10160000   0.00023119
  0.10160000   0.00018272
  0.10160000   0.00014443
  0.10160000   0.00011417
  0.10160000   0.00009026
  0.10160000   0.00007137
  0.10160000   0.00005644
  0.10160000   0.00004464
  0.10160000   0.00003532
  0.10160000   0.00002795
  0.10160000   0.00002213
  0.10160000   0.00001752
  0.10160000   0.00001389
  0.10180000   0.00313190
  0.10180000   0.00247625
  0.10180000   0.00195787
  0.10180000   0.00154803
  0.10180000   0.00122399
  0.10180000   0.00096780
  0.10180000   0.00076524
  0.10180000   0.00060509
  0.10180000   0.00047847
  0.10180000   0.00037836
  0.10180000   0.00029921
  0.10180000   0.00023663
  0.10180000   0.00018714
  0.10180000   0.00014802
  0.10180000   0.00011708
  0.10180000   0.00009262
  0.10180000   0.00007328
  0.10180000   0.00005799
  0.10180000   0.00004590
  0.10180000   0.00003633
  0.10180000   0.00002877
  0.10180000   0.00002279
  0.10180000   0.00001806
  0.10180000   0.00001432
  0.10200000   0.00318248
  0.10200000   0.00251790
  0.10200000   0.00199212
  0.10200000   0.00157614
  0.10200000   0.00124705
  0.10200000   0.00098668
  0.10200000   0.00078068
  0.10200000   0.00061771
  0.10200000   0.00048877
  0.10200000   0.00038676
  0.10200000   0.00030605
  0.10200000   0.00024219
  0.10200000   0.00019167
  0.10200000   0.00015170
  0.10200000   0.00012007
  0.10200000   0.00009505
  0.10200000   0.00007525
  0.10200000   0.00005958
  0.10200000   0.00004719
  0.10200000   0.00003738
  0.10200000   0.00002962
  0.10200000   0.00002347
  0.10200000   0.00001861
  0.10200000   0.00001477
  0.10220000   0.00323388
  0.10220000   0.00256025
  0.10220000   0.00202697
  0.10220000   0.00160477
  0.10220000   0.00127054
  0.10220000   0.00100593
  0.10220000   0.00079644
  0.10220000   0.00063059
  0.10220000   0.00049929
  0.10220000   0.00039534
  0.10220000   0.00031305
  0.10220000   0.00024789
  0.10220000   0.00019631
  0.10220000   0.00015547
  0.10220000   0.00012314
  0.10220000   0.00009754
  0.10220000   0.00007727
  0.10220000   0.00006122
  0.10220000   0.00004852
  0.10220000   0.00003846
  0.10220000   0.00003049
  0.10220000   0.00002418
  0.10220000   0.00001918
  0.10220000   0.00001523
  0.10240000   0.00328610
  0.10240000   0.00260332
  0.10240000   0.00206242
  0.10240000   0.00163392
  0.10240000   0.00129447
  0.10240000   0.00102555
  0.10240000   0.00081251
  0.10240000   0.00064374
  0.10240000   0.00051004
  0.10240000   0.00040412
  0.10240000   0.00032021
  0.10240000   0.00025373
  0.10240000   0.00020106
  0.10240000   0.00015934
  0.10240000   0.00012628
  0.10240000   0.00010009
  0.10240000   0.00007935
  0.10240000   0.00006291
  0.10240000   0.00004988
  0.10240000   0.00003956
  0.10240000   0.00003139
  0.10240000   0.00002491
  0.10240000   0.00001977
  0.10240000   0.00001570
  0.10260000   0.00333918
  0.10260000   0.00264712
  0.10260000   0.00209850
  0.10260000   0.00166361
  0.10260000   0.00131885
  0.10260000   0.00104556
  0.10260000   0.00082891
  0.10260000   0.00065717
  0.10260000   0.00052102
  0.10260000   0.00041309
  0.10260000   0.00032753
  0.10260000   0.00025970
  0.10260000   0.00020593
  0.10260000   0.00016330
  0.10260000   0.00012951
  0.10260000   0.00010272
  0.10260000   0.00008148
  0.10260000   0.00006464
  0.10260000   0.00005129
  0.10260000   0.00004070
  0.10260000   0.00003231
  0.10260000   0.00002565
  0.10260000   0.00002038
  0.10260000   0.00001619
  0.10280000   0.00339311
  0.10280000   0.00269165
  0.10280000   0.00213521
  0.10280000   0.00169383
  0.10280000   0.00134370
  0.10280000   0.00106596
  0.10280000   0.00084564
  0.10280000   0.00067087
  0.10280000   0.00053223
  0.10280000   0.00042226
  0.10280000   0.00033502
  0.10280000   0.00026581
  0.10280000   0.00021091
  0.10280000   0.00016736
  0.10280000   0.00013282
  0.10280000   0.00010541
  0.10280000   0.00008367
  0.10280000   0.00006642
  0.10280000   0.00005273
  0.10280000   0.00004187
  0.10280000   0.00003326
  0.10280000   0.00002643
  0.10280000   0.00002100
  0.10280000   0.00001670
  0.10300000   0.00344791
  0.10300000   0.00273693
  0.10300000   0.00217257
  0.10300000   0.00172460
  0.10300000   0.00136901
  0.10300000   0.00108676
  0.10300000   0.00086271
  0.10300000   0.00068486
  0.10300000   0.00054369
  0.10300000   0.00043163
  0.10300000   0.00034268
  0.10300000   0.00027207
  0.10300000   0.00021602
  0.10300000   0.00017153
  0.10300000   0.00013621
  0.10300000   0.00010817
  0.10300000   0.00008591
  0.10300000   0.00006824
  0.10300000   0.00005422
  0.10300000   0.00004308
  0.10300000   0.00003424
  0.10300000   0.00002722
  0.10300000   0.00002165
  0.10300000   0.00001722
  0.10320000   0.00350360
  0.10320000   0.00278297
  0.10320000   0.00221058
  0.10320000   0.00175593
  0.10320000   0.00139480
  0.10320000   0.00110796
  0.10320000   0.00088012
  0.10320000   0.00069915
  0.10320000   0.00055540
  0.10320000   0.00044121
  0.10320000   0.00035052
  0.10320000   0.00027848
  0.10320000   0.00022125
  0.10320000   0.00017580
  0.10320000   0.00013969
  0.10320000   0.00011101
  0.10320000   0.00008822
  0.10320000   0.00007012
  0.10320000   0.00005575
  0.10320000   0.00004432
  0.10320000   0.00003525
  0.10320000   0.00002804
  0.10320000   0.00002231
  0.10320000   0.00001776
  0.10340000   0.00356019
  0.10340000   0.00282979
  0.10340000   0.00224925
  0.10340000   0.00178783
  0.10340000   0.00142108
  0.10340000   0.00112958
  0.10340000   0.00089789
  0.10340000   0.00071373
  0.10340000   0.00056735
  0.10340000   0.00045101
  0.10340000   0.00035854
  0.10340000   0.00028503
  0.10340000   0.00022661
  0.10340000   0.00018017
  0.10340000   0.00014326
  0.10340000   0.00011392
  0.10340000   0.00009059
  0.10340000   0.00007205
  0.10340000   0.00005732
  0.10340000   0.00004560
  0.10340000   0.00003629
  0.10340000   0.00002888
  0.10340000   0.00002300
  0.10340000   0.00001832
  0.10360000   0.00361770
  0.10360000   0.00287740
  0.10360000   0.00228861
  0.10360000   0.00182031
  0.10360000   0.00144786
  0.10360000   0.00115162
  0.10360000   0.00091601
  0.10360000   0.00072861
  0.10360000   0.00057957
  0.10360000   0.00046102
  0.10360000   0.00036674
  0.10360000   0.00029174
  0.10360000   0.00023210
  0.10360000   0.00018465
  0.10360000   0.00014692
  0.10360000   0.00011690
  0.10360000   0.00009303
  0.10360000   0.00007404
  0.10360000   0.00005893
  0.10360000   0.00004692
  0.10360000   0.00003736
  0.10360000   0.00002975
  0.10360000   0.00002370
  0.10360000   0.00001889
  0.10380000   0.00367614
  0.10380000   0.00292581
  0.10380000   0.00232865
  0.10380000   0.00185339
  0.10380000   0.00147513
  0.10380000   0.00117409
  0.10380000   0.00093450
  0.10380000   0.00074381
  0.10380000   0.00059205
  0.10380000   0.00047126
  0.10380000   0.00037512
  0.10380000   0.00029861
  0.10380000   0.00023772
  0.10380000   0.00018925
  0.10380000   0.00015067
  0.10380000   0.00011997
  0.10380000   0.00009553
  0.10380000   0.00007608
  0.10380000   0.00006059
  0.10380000   0.00004827
  0.10380000   0.00003846
  0.10380000   0.00003065
  0.10380000   0.00002443
  0.10380000   0.00001948
  0.10400000   0.00373552
  0.10400000   0.00297504
  0.10400000   0.00236940
  0.10400000   0.00188706
  0.10400000   0.00150293
  0.10400000   0.00119700
  0.10400000   0.00095336
  0.10400000   0.00075933
  0.10400000   0.00060479
  0.10400000   0.00048172
  0.10400000   0.00038371
  0.10400000   0.00030564
  0.10400000   0.00024347
  0.10400000   0.00019396
  0.10400000   0.00015452
  0.10400000   0.00012311
  0.10400000   0.00009810
  0.10400000   0.00007817
  0.10400000   0.00006230
  0.10400000   0.00004966
  0.10400000   0.00003959
  0.10400000   0.00003157
  0.10400000   0.00002518
  0.10400000   0.00002010
  0.10420000   0.00379586
  0.10420000   0.00302510
  0.10420000   0.00241085
  0.10420000   0.00192135
  0.10420000   0.00153125
  0.10420000   0.00122036
  0.10420000   0.00097261
  0.10420000   0.00077517
  0.10420000   0.00061782
  0.10420000   0.00049242
  0.10420000   0.00039248
  0.10420000   0.00031284
  0.10420000   0.00024937
  0.10420000   0.00019878
  0.10420000   0.00015847
  0.10420000   0.00012634
  0.10420000   0.00010073
  0.10420000   0.00008032
  0.10420000   0.00006406
  0.10420000   0.00005109
  0.10420000   0.00004076
  0.10420000   0.00003252
  0.10420000   0.00002596
  0.10420000   0.00002073
  0.10440000   0.00385718
  0.10440000   0.00307600
  0.10440000   0.00245304
  0.10440000   0.00195626
  0.10440000   0.00156010
  0.10440000   0.00124418
  0.10440000   0.00099225
  0.10440000   0.00079134
  0.10440000   0.00063112
  0.10440000   0.00050335
  0.10440000   0.00040146
  0.10440000   0.00032021
  0.10440000   0.00025541
  0.10440000   0.00020373
  0.10440000   0.00016252
  0.10440000   0.00012965
  0.10440000   0.00010344
  0.10440000   0.00008254
  0.10440000   0.00006587
  0.10440000   0.00005257
  0.10440000   0.00004196
  0.10440000   0.00003350
  0.10440000   0.00002676
  0.10440000   0.00002138
  0.10460000   0.00391949
  0.10460000   0.00312775
  0.10460000   0.00249596
  0.10460000   0.00199181
  0.10460000   0.00158950
  0.10460000   0.00126846
  0.10460000   0.00101228
  0.10460000   0.00080785
  0.10460000   0.00064471
  0.10460000   0.00051453
  0.10460000   0.00041065
  0.10460000   0.00032775
  0.10460000   0.00026159
  0.10460000   0.00020880
  0.10460000   0.00016667
  0.10460000   0.00013305
  0.10460000   0.00010622
  0.10460000   0.00008481
  0.10460000   0.00006772
  0.10460000   0.00005409
  0.10460000   0.00004320
  0.10460000   0.00003452
  0.10460000   0.00002758
  0.10460000   0.00002205
  0.10480000   0.00398281
  0.10480000   0.00318038
  0.10480000   0.00253964
  0.10480000   0.00202800
  0.10480000   0.00161945
  0.10480000   0.00129322
  0.10480000   0.00103271
  0.10480000   0.00082470
  0.10480000   0.00065860
  0.10480000   0.00052596
  0.10480000   0.00042004
  0.10480000   0.00033547
  0.10480000   0.00026793
  0.10480000   0.00021400
  0.10480000   0.00017093
  0.10480000   0.00013654
  0.10480000   0.00010908
  0.10480000   0.00008715
  0.10480000   0.00006963
  0.10480000   0.00005565
  0.10480000   0.00004448
  0.10480000   0.00003556
  0.10480000   0.00002843
  0.10480000   0.00002274
  0.10500000   0.00404715
  0.10500000   0.00323390
  0.10500000   0.00258408
  0.10500000   0.00206485
  0.10500000   0.00164997
  0.10500000   0.00131846
  0.10500000   0.00105357
  0.10500000   0.00084191
  0.10500000   0.00067278
  0.10500000   0.00053764
  0.10500000   0.00042965
  0.10500000   0.00034337
  0.10500000   0.00027442
  0.10500000   0.00021933
  0.10500000   0.00017530
  0.10500000   0.00014012
  0.10500000   0.00011201
  0.10500000   0.00008955
  0.10500000   0.00007160
  0.10500000   0.00005725
  0.10500000   0.00004579
  0.10500000   0.00003663
  0.10500000   0.00002931
  0.10500000   0.00002345
  0.10520000   0.00411254
  0.10520000   0.00328832
  0.10520000   0.00262930
  0.10520000   0.00210237
  0.10520000   0.00168106
  0.10520000   0.00134419
  0.10520000   0.00107484
  0.10520000   0.00085947
  0.10520000   0.00068727
  0.10520000   0.00054958
  0.10520000   0.00043949
  0.10520000   0.00035146
  0.10520000   0.00028107
  0.10520000   0.00022479
  0.10520000   0.00017979
  0.10520000   0.00014380
  0.10520000   0.00011503
  0.10520000   0.00009202
  0.10520000   0.00007362
  0.10520000   0.00005891
  0.10520000   0.00004714
  0.10520000   0.00003773
  0.10520000   0.00003021
  0.10520000   0.00002419
  0.10540000   0.00417898
  0.10540000   0.00334365
  0.10540000   0.00267531
  0.10540000   0.00214058
  0.10540000   0.00171274
  0.10540000   0.00137043
  0.10540000   0.00109654
  0.10540000   0.00087740
  0.10540000   0.00070207
  0.10540000   0.00056179
  0.10540000   0.00044954
  0.10540000   0.00035974
  0.10540000   0.00028788
  0.10540000   0.00023038
  0.10540000   0.00018438
  0.10540000   0.00014757
  0.10540000   0.00011812
  0.10540000   0.00009455
  0.10540000   0.00007570
  0.10540000   0.00006061
  0.10540000   0.00004853
  0.10540000   0.00003887
  0.10540000   0.00003114
  0.10540000   0.00002495
  0.10560000   0.00424649
  0.10560000   0.00339992
  0.10560000   0.00272213
  0.10560000   0.00217948
  0.10560000   0.00174502
  0.10560000   0.00139717
  0.10560000   0.00111868
  0.10560000   0.00089571
  0.10560000   0.00071719
  0.10560000   0.00057426
  0.10560000   0.00045983
  0.10560000   0.00036821
  0.10560000   0.00029485
  0.10560000   0.00023612
  0.10560000   0.00018910
  0.10560000   0.00015144
  0.10560000   0.00012130
  0.10560000   0.00009716
  0.10560000   0.00007783
  0.10560000   0.00006236
  0.10560000   0.00004997
  0.10560000   0.00004005
  0.10560000   0.00003210
  0.10560000   0.00002574
  0.10580000   0.00431510
  0.10580000   0.00345714
  0.10580000   0.00276977
  0.10580000   0.00221909
  0.10580000   0.00177790
  0.10580000   0.00142445
  0.10580000   0.00114127
  0.10580000   0.00091440
  0.10580000   0.00073264
  0.10580000   0.00058702
  0.10580000   0.00047035
  0.10580000   0.00037688
  0.10580000   0.00030200
  0.10580000   0.00024200
  0.10580000   0.00019393
  0.10580000   0.00015542
  0.10580000   0.00012456
  0.10580000   0.00009984
  0.10580000   0.00008003
  0.10580000   0.00006416
  0.10580000   0.00005144
  0.10580000   0.00004125
  0.10580000   0.00003309
  0.10580000   0.00002655
  0.10600000   0.00438482
  0.10600000   0.00351532
  0.10600000   0.00281825
  0.10600000   0.00225942
  0.10600000   0.00181141
  0.10600000   0.00145225
  0.10600000   0.00116432
  0.10600000   0.00093348
  0.10600000   0.00074842
  0.10600000   0.00060006
  0.10600000   0.00048112
  0.10600000   0.00038576
  0.10600000   0.00030932
  0.10600000   0.00024803
  0.10600000   0.00019889
  0.10600000   0.00015950
  0.10600000   0.00012791
  0.10600000   0.00010259
  0.10600000   0.00008229
  0.10600000   0.00006601
  0.10600000   0.00005296
  0.10600000   0.00004250
  0.10600000   0.00003411
  0.10600000   0.00002738
  0.10620000   0.00445567
  0.10620000   0.00357448
  0.10620000   0.00286757
  0.10620000   0.00230048
  0.10620000   0.00184555
  0.10620000   0.00148060
  0.10620000   0.00118783
  0.10620000   0.00095296
  0.10620000   0.00076454
  0.10620000   0.00061339
  0.10620000   0.00049213
  0.10620000   0.00039485
  0.10620000   0.00031681
  0.10620000   0.00025420
  0.10620000   0.00020398
  0.10620000   0.00016368
  0.10620000   0.00013136
  0.10620000   0.00010542
  0.10620000   0.00008462
  0.10620000   0.00006792
  0.10620000   0.00005453
  0.10620000   0.00004378
  0.10620000   0.00003516
  0.10620000   0.00002824
  0.10640000   0.00452766
  0.10640000   0.00363464
  0.10640000   0.00291776
  0.10640000   0.00234229
  0.10640000   0.00188034
  0.10640000   0.00150950
  0.10640000   0.00121181
  0.10640000   0.00097284
  0.10640000   0.00078101
  0.10640000   0.00062701
  0.10640000   0.00050339
  0.10640000   0.00040415
  0.10640000   0.00032449
  0.10640000   0.00026053
  0.10640000   0.00020919
  0.10640000   0.00016798
  0.10640000   0.00013489
  0.10640000   0.00010833
  0.10640000   0.00008700
  0.10640000   0.00006989
  0.10640000   0.00005614
  0.10640000   0.00004511
  0.10640000   0.00003625
  0.10640000   0.00002913
  0.10660000   0.00460082
  0.10660000   0.00369581
  0.10660000   0.00296883
  0.10660000   0.00238486
  0.10660000   0.00191578
  0.10660000   0.00153897
  0.10660000   0.00123629
  0.10660000   0.00099315
  0.10660000   0.00079784
  0.10660000   0.00064094
  0.10660000   0.00051491
  0.10660000   0.00041368
  0.10660000   0.00033235
  0.10660000   0.00026702
  0.10660000   0.00021454
  0.10660000   0.00017239
  0.10660000   0.00013852
  0.10660000   0.00011132
  0.10660000   0.00008946
  0.10660000   0.00007191
  0.10660000   0.00005780
  0.10660000   0.00004647
  0.10660000   0.00003737
  0.10660000   0.00003005
  0.10680000   0.00467516
  0.10680000   0.00375801
  0.10680000   0.00302079
  0.10680000   0.00242821
  0.10680000   0.00195189
  0.10680000   0.00156901
  0.10680000   0.00126125
  0.10680000   0.00101387
  0.10680000   0.00081502
  0.10680000   0.00065518
  0.10680000   0.00052670
  0.10680000   0.00042342
  0.10680000   0.00034041
  0.10680000   0.00027367
  0.10680000   0.00022003
  0.10680000   0.00017691
  0.10680000   0.00014225
  0.10680000   0.00011439
  0.10680000   0.00009199
  0.10680000   0.00007398
  0.10680000   0.00005951
  0.10680000   0.00004787
  0.10680000   0.00003852
  0.10680000   0.00003100
  0.10700000   0.00475071
  0.10700000   0.00382126
  0.10700000   0.00307367
  0.10700000   0.00247235
  0.10700000   0.00198868
  0.10700000   0.00159965
  0.10700000   0.00128673
  0.10700000   0.00103503
  0.10700000   0.00083258
  0.10700000   0.00066974
  0.10700000   0.00053876
  0.10700000   0.00043340
  0.10700000   0.00034866
  0.10700000   0.00028049
  0.10700000   0.00022566
  0.10700000   0.00018156
  0.10700000   0.00014608
  0.10700000   0.00011754
  0.10700000   0.00009459
  0.10700000   0.00007612
  0.10700000   0.00006127
  0.10700000   0.00004932
  0.10700000   0.00003971
  0.10700000   0.00003197
  0.10720000   0.00482748
  0.10720000   0.00388558
  0.10720000   0.00312747
  0.10720000   0.00251729
  0.10720000   0.00202617
  0.10720000   0.00163088
  0.10720000   0.00131271
  0.10720000   0.00105663
  0.10720000   0.00085052
  0.10720000   0.00068462
  0.10720000   0.00055109
  0.10720000   0.00044361
  0.10720000   0.00035711
  0.10720000   0.00028748
  0.10720000   0.00023143
  0.10720000   0.00018632
  0.10720000   0.00015001
  0.10720000   0.00012079
  0.10720000   0.00009726
  0.10720000   0.00007832
  0.10720000   0.00006308
  0.10720000   0.00005081
  0.10720000   0.00004093
  0.10720000   0.00003298
  0.10740000   0.00490549
  0.10740000   0.00395098
  0.10740000   0.00318221
  0.10740000   0.00256304
  0.10740000   0.00206436
  0.10740000   0.00166272
  0.10740000   0.00133923
  0.10740000   0.00107869
  0.10740000   0.00086884
  0.10740000   0.00069983
  0.10740000   0.00056371
  0.10740000   0.00045407
  0.10740000   0.00036576
  0.10740000   0.00029464
  0.10740000   0.00023735
  0.10740000   0.00019122
  0.10740000   0.00015405
  0.10740000   0.00012412
  0.10740000   0.00010001
  0.10740000   0.00008059
  0.10740000   0.00006495
  0.10740000   0.00005235
  0.10740000   0.00004220
  0.10740000   0.00003402
  0.10760000   0.00498476
  0.10760000   0.00401748
  0.10760000   0.00323792
  0.10760000   0.00260963
  0.10760000   0.00210327
  0.10760000   0.00169518
  0.10760000   0.00136628
  0.10760000   0.00110120
  0.10760000   0.00088756
  0.10760000   0.00071538
  0.10760000   0.00057661
  0.10760000   0.00046477
  0.10760000   0.00037463
  0.10760000   0.00030198
  0.10760000   0.00024343
  0.10760000   0.00019624
  0.10760000   0.00015820
  0.10760000   0.00012754
  0.10760000   0.00010284
  0.10760000   0.00008292
  0.10760000   0.00006687
  0.10760000   0.00005393
  0.10760000   0.00004350
  0.10760000   0.00003510
  0.10780000   0.00506531
  0.10780000   0.00408511
  0.10780000   0.00329460
  0.10780000   0.00265707
  0.10780000   0.00214292
  0.10780000   0.00172828
  0.10780000   0.00139387
  0.10780000   0.00112418
  0.10780000   0.00090669
  0.10780000   0.00073128
  0.10780000   0.00058981
  0.10780000   0.00047572
  0.10780000   0.00038371
  0.10780000   0.00030950
  0.10780000   0.00024966
  0.10780000   0.00020139
  0.10780000   0.00016246
  0.10780000   0.00013106
  0.10780000   0.00010574
  0.10780000   0.00008532
  0.10780000   0.00006885
  0.10780000   0.00005556
  0.10780000   0.00004485
  0.10780000   0.00003620
  0.10800000   0.00514717
  0.10800000   0.00415387
  0.10800000   0.00335227
  0.10800000   0.00270537
  0.10800000   0.00218332
  0.10800000   0.00176202
  0.10800000   0.00142203
  0.10800000   0.00114765
  0.10800000   0.00092622
  0.10800000   0.00074753
  0.10800000   0.00060332
  0.10800000   0.00048694
  0.10800000   0.00039301
  0.10800000   0.00031722
  0.10800000   0.00025604
  0.10800000   0.00020668
  0.10800000   0.00016684
  0.10800000   0.00013468
  0.10800000   0.00010873
  0.10800000   0.00008779
  0.10800000   0.00007088
  0.10800000   0.00005724
  0.10800000   0.00004623
  0.10800000   0.00003735
  0.10820000   0.00523035
  0.10820000   0.00422379
  0.10820000   0.00341095
  0.10820000   0.00275455
  0.10820000   0.00222448
  0.10820000   0.00179643
  0.10820000   0.00145075
  0.10820000   0.00117161
  0.10820000   0.00094618
  0.10820000   0.00076414
  0.10820000   0.00061713
  0.10820000   0.00049841
  0.10820000   0.00040254
  0.10820000   0.00032512
  0.10820000   0.00026260
  0.10820000   0.00021210
  0.10820000   0.00017133
  0.10820000   0.00013840
  0.10820000   0.00011181
  0.10820000   0.00009033
  0.10820000   0.00007298
  0.10820000   0.00005897
  0.10820000   0.00004766
  0.10820000   0.00003852
  0.10840000   0.00531488
  0.10840000   0.00429489
  0.10840000   0.00347067
  0.10840000   0.00280463
  0.10840000   0.00226642
  0.10840000   0.00183150
  0.10840000   0.00148006
  0.10840000   0.00119606
  0.10840000   0.00096657
  0.10840000   0.00078112
  0.10840000   0.00063126
  0.10840000   0.00051016
  0.10840000   0.00041230
  0.10840000   0.00033322
  0.10840000   0.00026932
  0.10840000   0.00021768
  0.10840000   0.00017594
  0.10840000   0.00014222
  0.10840000   0.00011497
  0.10840000   0.00009294
  0.10840000   0.00007514
  0.10840000   0.00006076
  0.10840000   0.00004913
  0.10840000   0.00003974
  0.10860000   0.00540078
  0.10860000   0.00436720
  0.10860000   0.00353143
  0.10860000   0.00285562
  0.10860000   0.00230915
  0.10860000   0.00186727
  0.10860000   0.00150996
  0.10860000   0.00122103
  0.10860000   0.00098740
  0.10860000   0.00079848
  0.10860000   0.00064571
  0.10860000   0.00052219
  0.10860000   0.00042230
  0.10860000   0.00034152
  0.10860000   0.00027621
  0.10860000   0.00022339
  0.10860000   0.00018068
  0.10860000   0.00014615
  0.10860000   0.00011822
  0.10860000   0.00009563
  0.10860000   0.00007737
  0.10860000   0.00006260
  0.10860000   0.00005065
  0.10860000   0.00004099
  0.10880000   0.00548807
  0.10880000   0.00444071
  0.10880000   0.00359325
  0.10880000   0.00290753
  0.10880000   0.00235269
  0.10880000   0.00190373
  0.10880000   0.00154046
  0.10880000   0.00124652
  0.10880000   0.00100868
  0.10880000   0.00081622
  0.10880000   0.00066050
  0.10880000   0.00053450
  0.10880000   0.00043254
  0.10880000   0.00035004
  0.10880000   0.00028328
  0.10880000   0.00022926
  0.10880000   0.00018555
  0.10880000   0.00015018
  0.10880000   0.00012156
  0.10880000   0.00009840
  0.10880000   0.00007966
  0.10880000   0.00006449
  0.10880000   0.00005222
  0.10880000   0.00004229
  0.10900000   0.00557677
  0.10900000   0.00451547
  0.10900000   0.00365616
  0.10900000   0.00296039
  0.10900000   0.00239704
  0.10900000   0.00194091
  0.10900000   0.00157158
  0.10900000   0.00127254
  0.10900000   0.00103041
  0.10900000   0.00083436
  0.10900000   0.00067563
  0.10900000   0.00054710
  0.10900000   0.00044302
  0.10900000   0.00035876
  0.10900000   0.00029053
  0.10900000   0.00023528
  0.10900000   0.00019055
  0.10900000   0.00015433
  0.10900000   0.00012500
  0.10900000   0.00010125
  0.10900000   0.00008202
  0.10900000   0.00006645
  0.10900000   0.00005384
  0.10900000   0.00004362
  0.10920000   0.00566690
  0.10920000   0.00459149
  0.10920000   0.00372017
  0.10920000   0.00301422
  0.10920000   0.00244224
  0.10920000   0.00197881
  0.10920000   0.00160333
  0.10920000   0.00129911
  0.10920000   0.00105262
  0.10920000   0.00085291
  0.10920000   0.00069110
  0.10920000   0.00055999
  0.10920000   0.00045377
  0.10920000   0.00036770
  0.10920000   0.00029797
  0.10920000   0.00024146
  0.10920000   0.00019568
  0.10920000   0.00015859
  0.10920000   0.00012853
  0.10920000   0.00010418
  0.10920000   0.00008445
  0.10920000   0.00006846
  0.10920000   0.00005550
  0.10920000   0.00004500
  0.10940000   0.00575850
  0.10940000   0.00466879
  0.10940000   0.00378531
  0.10940000   0.00306902
  0.10940000   0.00248829
  0.10940000   0.00201745
  0.10940000   0.00163572
  0.10940000   0.00132623
  0.10940000   0.00107530
  0.10940000   0.00087187
  0.10940000   0.00070692
  0.10940000   0.00057319
  0.10940000   0.00046477
  0.10940000   0.00037686
  0.10940000   0.00030559
  0.10940000   0.00024781
  0.10940000   0.00020095
  0.10940000   0.00016297
  0.10940000   0.00013217
  0.10940000   0.00010720
  0.10940000   0.00008695
  0.10940000   0.00007053
  0.10940000   0.00005722
  0.10940000   0.00004642
  0.10960000   0.00585157
  0.10960000   0.00474739
  0.10960000   0.00385158
  0.10960000   0.00312482
  0.10960000   0.00253520
  0.10960000   0.00205685
  0.10960000   0.00166877
  0.10960000   0.00135392
  0.10960000   0.00109848
  0.10960000   0.00089124
  0.10960000   0.00072311
  0.10960000   0.00058671
  0.10960000   0.00047604
  0.10960000   0.00038626
  0.10960000   0.00031342
  0.10960000   0.00025432
  0.10960000   0.00020637
  0.10960000   0.00016747
  0.10960000   0.00013591
  0.10960000   0.00011030
  0.10960000   0.00008952
  0.10960000   0.00007267
  0.10960000   0.00005899
  0.10960000   0.00004789
  0.10980000   0.00594616
  0.10980000   0.00482732
  0.10980000   0.00391902
  0.10980000   0.00318164
  0.10980000   0.00258301
  0.10980000   0.00209702
  0.10980000   0.00170248
  0.10980000   0.00138219
  0.10980000   0.00112216
  0.10980000   0.00091105
  0.10980000   0.00073967
  0.10980000   0.00060054
  0.10980000   0.00048759
  0.10980000   0.00039589
  0.10980000   0.00032144
  0.10980000   0.00026100
  0.10980000   0.00021193
  0.10980000   0.00017209
  0.10980000   0.00013975
  0.10980000   0.00011349
  0.10980000   0.00009218
  0.10980000   0.00007487
  0.10980000   0.00006081
  0.10980000   0.00004941
  0.11000000   0.00604227
  0.11000000   0.00490860
  0.11000000   0.00398764
  0.11000000   0.00323949
  0.11000000   0.00263171
  0.11000000   0.00213798
  0.11000000   0.00173688
  0.11000000   0.00141104
  0.11000000   0.00114634
  0.11000000   0.00093131
  0.11000000   0.00075662
  0.11000000   0.00061470
  0.11000000   0.00049941
  0.11000000   0.00040575
  0.11000000   0.00032967
  0.11000000   0.00026786
  0.11000000   0.00021764
  0.11000000   0.00017685
  0.11000000   0.00014371
  0.11000000   0.00011678
  0.11000000   0.00009491
  0.11000000   0.00007714
  0.11000000   0.00006270
  0.11000000   0.00005097
  0.11020000   0.00613994
  0.11020000   0.00499124
  0.11020000   0.00405746
  0.11020000   0.00329839
  0.11020000   0.00268134
  0.11020000   0.00217973
  0.11020000   0.00177198
  0.11020000   0.00144051
  0.11020000   0.00117105
  0.11020000   0.00095201
  0.11020000   0.00077394
  0.11020000   0.00062920
  0.11020000   0.00051153
  0.11020000   0.00041587
  0.11020000   0.00033811
  0.11020000   0.00027490
  0.11020000   0.00022351
  0.11020000   0.00018173
  0.11020000   0.00014777
  0.11020000   0.00012016
  0.11020000   0.00009772
  0.11020000   0.00007947
  0.11020000   0.00006464
  0.11020000   0.00005258
  0.11040000   0.00623919
  0.11040000   0.00507528
  0.11040000   0.00412851
  0.11040000   0.00335837
  0.11040000   0.00273190
  0.11040000   0.00222231
  0.11040000   0.00180778
  0.11040000   0.00147058
  0.11040000   0.00119629
  0.11040000   0.00097317
  0.11040000   0.00079167
  0.11040000   0.00064403
  0.11040000   0.00052393
  0.11040000   0.00042624
  0.11040000   0.00034677
  0.11040000   0.00028212
  0.11040000   0.00022953
  0.11040000   0.00018675
  0.11040000   0.00015195
  0.11040000   0.00012364
  0.11040000   0.00010061
  0.11040000   0.00008188
  0.11040000   0.00006664
  0.11040000   0.00005424
  0.11060000   0.00634004
  0.11060000   0.00516074
  0.11060000   0.00420080
  0.11060000   0.00341944
  0.11060000   0.00278342
  0.11060000   0.00226571
  0.11060000   0.00184431
  0.11060000   0.00150129
  0.11060000   0.00122208
  0.11060000   0.00099480
  0.11060000   0.00080981
  0.11060000   0.00065922
  0.11060000   0.00053664
  0.11060000   0.00043686
  0.11060000   0.00035565
  0.11060000   0.00028953
  0.11060000   0.00023572
  0.11060000   0.00019191
  0.11060000   0.00015625
  0.11060000   0.00012723
  0.11060000   0.00010360
  0.11060000   0.00008436
  0.11060000   0.00006870
  0.11060000   0.00005596
  0.11080000   0.00644253
  0.11080000   0.00524763
  0.11080000   0.00427436
  0.11080000   0.00348162
  0.11080000   0.00283591
  0.11080000   0.00230997
  0.11080000   0.00188158
  0.11080000   0.00153264
  0.11080000   0.00124842
  0.11080000   0.00101692
  0.11080000   0.00082836
  0.11080000   0.00067476
  0.11080000   0.00054966
  0.11080000   0.00044776
  0.11080000   0.00036475
  0.11080000   0.00029714
  0.11080000   0.00024207
  0.11080000   0.00019721
  0.11080000   0.00016067
  0.11080000   0.00013091
  0.11080000   0.00010667
  0.11080000   0.00008692
  0.11080000   0.00007083
  0.11080000   0.00005773
  0.11100000   0.00654668
  0.11100000   0.00533599
  0.11100000   0.00434921
  0.11100000   0.00354493
  0.11100000   0.00288939
  0.11100000   0.00235509
  0.11100000   0.00191960
  0.11100000   0.00156464
  0.11100000   0.00127533
  0.11100000   0.00103953
  0.11100000   0.00084733
  0.11100000   0.00069068
  0.11100000   0.00056299
  0.11100000   0.00045892
  0.11100000   0.00037409
  0.11100000   0.00030495
  0.11100000   0.00024860
  0.11100000   0.00020266
  0.11100000   0.00016522
  0.11100000   0.00013470
  0.11100000   0.00010983
  0.11100000   0.00008955
  0.11100000   0.00007303
  0.11100000   0.00005955
  0.11120000   0.00665251
  0.11120000   0.00542584
  0.11120000   0.00442538
  0.11120000   0.00360940
  0.11120000   0.00294388
  0.11120000   0.00240109
  0.11120000   0.00195839
  0.11120000   0.00159732
  0.11120000   0.00130283
  0.11120000   0.00106264
  0.11120000   0.00086674
  0.11120000   0.00070696
  0.11120000   0.00057665
  0.11120000   0.00047036
  0.11120000   0.00038367
  0.11120000   0.00031297
  0.11120000   0.00025530
  0.11120000   0.00020826
  0.11120000   0.00016990
  0.11120000   0.00013861
  0.11120000   0.00011308
  0.11120000   0.00009227
  0.11120000   0.00007529
  0.11120000   0.00006144
  0.11140000   0.00676006
  0.11140000   0.00551721
  0.11140000   0.00450287
  0.11140000   0.00367504
  0.11140000   0.00299940
  0.11140000   0.00244799
  0.11140000   0.00199796
  0.11140000   0.00163067
  0.11140000   0.00133091
  0.11140000   0.00108627
  0.11140000   0.00088660
  0.11140000   0.00072364
  0.11140000   0.00059064
  0.11140000   0.00048209
  0.11140000   0.00039350
  0.11140000   0.00032119
  0.11140000   0.00026218
  0.11140000   0.00021402
  0.11140000   0.00017471
  0.11140000   0.00014262
  0.11140000   0.00011644
  0.11140000   0.00009506
  0.11140000   0.00007762
  0.11140000   0.00006338
  0.11160000   0.00686934
  0.11160000   0.00561012
  0.11160000   0.00458173
  0.11160000   0.00374187
  0.11160000   0.00305597
  0.11160000   0.00249581
  0.11160000   0.00203834
  0.11160000   0.00166473
  0.11160000   0.00135961
  0.11160000   0.00111042
  0.11160000   0.00090691
  0.11160000   0.00074070
  0.11160000   0.00060497
  0.11160000   0.00049411
  0.11160000   0.00040358
  0.11160000   0.00032964
  0.11160000   0.00026925
  0.11160000   0.00021993
  0.11160000   0.00017965
  0.11160000   0.00014676
  0.11160000   0.00011989
  0.11160000   0.00009795
  0.11160000   0.00008003
  0.11160000   0.00006539
  0.11180000   0.00698040
  0.11180000   0.00570459
  0.11180000   0.00466197
  0.11180000   0.00380992
  0.11180000   0.00311361
  0.11180000   0.00254457
  0.11180000   0.00207953
  0.11180000   0.00169949
  0.11180000   0.00138892
  0.11180000   0.00113511
  0.11180000   0.00092769
  0.11180000   0.00075817
  0.11180000   0.00061964
  0.11180000   0.00050643
  0.11180000   0.00041391
  0.11180000   0.00033830
  0.11180000   0.00027651
  0.11180000   0.00022601
  0.11180000   0.00018474
  0.11180000   0.00015101
  0.11180000   0.00012345
  0.11180000   0.00010092
  0.11180000   0.00008251
  0.11180000   0.00006746
  0.11200000   0.00709325
  0.11200000   0.00580065
  0.11200000   0.00474362
  0.11200000   0.00387921
  0.11200000   0.00317233
  0.11200000   0.00259427
  0.11200000   0.00212156
  0.11200000   0.00173499
  0.11200000   0.00141886
  0.11200000   0.00116035
  0.11200000   0.00094894
  0.11200000   0.00077606
  0.11200000   0.00063468
  0.11200000   0.00051906
  0.11200000   0.00042451
  0.11200000   0.00034720
  0.11200000   0.00028397
  0.11200000   0.00023226
  0.11200000   0.00018997
  0.11200000   0.00015539
  0.11200000   0.00012711
  0.11200000   0.00010398
  0.11200000   0.00008506
  0.11200000   0.00006959
  0.11220000   0.00720793
  0.11220000   0.00589834
  0.11220000   0.00482669
  0.11220000   0.00394976
  0.11220000   0.00323217
  0.11220000   0.00264495
  0.11220000   0.00216444
  0.11220000   0.00177122
  0.11220000   0.00144945
  0.11220000   0.00118615
  0.11220000   0.00097068
  0.11220000   0.00079436
  0.11220000   0.00065008
  0.11220000   0.00053201
  0.11220000   0.00043539
  0.11220000   0.00035632
  0.11220000   0.00029162
  0.11220000   0.00023868
  0.11220000   0.00019535
  0.11220000   0.00015989
  0.11220000   0.00013088
  0.11220000   0.00010713
  0.11220000   0.00008770
  0.11220000   0.00007180
  0.11240000   0.00732447
  0.11240000   0.00599767
  0.11240000   0.00491123
  0.11240000   0.00402160
  0.11240000   0.00329313
  0.11240000   0.00269663
  0.11240000   0.00220818
  0.11240000   0.00180822
  0.11240000   0.00148071
  0.11240000   0.00121252
  0.11240000   0.00099292
  0.11240000   0.00081310
  0.11240000   0.00066585
  0.11240000   0.00054528
  0.11240000   0.00044654
  0.11240000   0.00036569
  0.11240000   0.00029949
  0.11240000   0.00024527
  0.11240000   0.00020088
  0.11240000   0.00016453
  0.11240000   0.00013476
  0.11240000   0.00011038
  0.11240000   0.00009042
  0.11240000   0.00007407
  0.11260000   0.00744289
  0.11260000   0.00609868
  0.11260000   0.00499724
  0.11260000   0.00409474
  0.11260000   0.00335525
  0.11260000   0.00274931
  0.11260000   0.00225281
  0.11260000   0.00184598
  0.11260000   0.00151263
  0.11260000   0.00123949
  0.11260000   0.00101567
  0.11260000   0.00083228
  0.11260000   0.00068201
  0.11260000   0.00055887
  0.11260000   0.00045798
  0.11260000   0.00037531
  0.11260000   0.00030756
  0.11260000   0.00025205
  0.11260000   0.00020657
  0.11260000   0.00016930
  0.11260000   0.00013876
  0.11260000   0.00011373
  0.11260000   0.00009322
  0.11260000   0.00007642
  0.11280000   0.00756323
  0.11280000   0.00620139
  0.11280000   0.00508477
  0.11280000   0.00416922
  0.11280000   0.00341853
  0.11280000   0.00280302
  0.11280000   0.00229834
  0.11280000   0.00188454
  0.11280000   0.00154525
  0.11280000   0.00126705
  0.11280000   0.00103894
  0.11280000   0.00085191
  0.11280000   0.00069856
  0.11280000   0.00057281
  0.11280000   0.00046971
  0.11280000   0.00038517
  0.11280000   0.00031586
  0.11280000   0.00025902
  0.11280000   0.00021242
  0.11280000   0.00017420
  0.11280000   0.00014287
  0.11280000   0.00011718
  0.11280000   0.00009611
  0.11280000   0.00007884
  0.11300000   0.00768552
  0.11300000   0.00630583
  0.11300000   0.00517383
  0.11300000   0.00424505
  0.11300000   0.00348302
  0.11300000   0.00285779
  0.11300000   0.00234480
  0.11300000   0.00192390
  0.11300000   0.00157857
  0.11300000   0.00129523
  0.11300000   0.00106275
  0.11300000   0.00087201
  0.11300000   0.00071551
  0.11300000   0.00058710
  0.11300000   0.00048175
  0.11300000   0.00039530
  0.11300000   0.00032438
  0.11300000   0.00026618
  0.11300000   0.00021843
  0.11300000   0.00017926
  0.11300000   0.00014711
  0.11300000   0.00012073
  0.11300000   0.00009909
  0.11300000   0.00008133
  0.11320000   0.00780979
  0.11320000   0.00641203
  0.11320000   0.00526445
  0.11320000   0.00432227
  0.11320000   0.00354872
  0.11320000   0.00291362
  0.11320000   0.00239219
  0.11320000   0.00196409
  0.11320000   0.00161261
  0.11320000   0.00132403
  0.11320000   0.00108710
  0.11320000   0.00089258
  0.11320000   0.00073287
  0.11320000   0.00060175
  0.11320000   0.00049409
  0.11320000   0.00040570
  0.11320000   0.00033313
  0.11320000   0.00027354
  0.11320000   0.00022462
  0.11320000   0.00018445
  0.11320000   0.00015148
  0.11320000   0.00012440
  0.11320000   0.00010217
  0.11320000   0.00008391
  0.11340000   0.00793606
  0.11340000   0.00652002
  0.11340000   0.00535666
  0.11340000   0.00440089
  0.11340000   0.00361566
  0.11340000   0.00297055
  0.11340000   0.00244054
  0.11340000   0.00200511
  0.11340000   0.00164738
  0.11340000   0.00135348
  0.11340000   0.00111201
  0.11340000   0.00091364
  0.11340000   0.00075066
  0.11340000   0.00061676
  0.11340000   0.00050675
  0.11340000   0.00041637
  0.11340000   0.00034211
  0.11340000   0.00028110
  0.11340000   0.00023098
  0.11340000   0.00018980
  0.11340000   0.00015597
  0.11340000   0.00012817
  0.11340000   0.00010533
  0.11340000   0.00008657
  0.11360000   0.00806439
  0.11360000   0.00662984
  0.11360000   0.00545049
  0.11360000   0.00448094
  0.11360000   0.00368387
  0.11360000   0.00302859
  0.11360000   0.00248988
  0.11360000   0.00204700
  0.11360000   0.00168290
  0.11360000   0.00138358
  0.11360000   0.00113750
  0.11360000   0.00093519
  0.11360000   0.00076887
  0.11360000   0.00063214
  0.11360000   0.00051973
  0.11360000   0.00042732
  0.11360000   0.00035134
  0.11360000   0.00028888
  0.11360000   0.00023753
  0.11360000   0.00019531
  0.11360000   0.00016060
  0.11360000   0.00013206
  0.11360000   0.00010860
  0.11360000   0.00008931
  0.11380000   0.00819479
  0.11380000   0.00674150
  0.11380000   0.00554596
  0.11380000   0.00456245
  0.11380000   0.00375336
  0.11380000   0.00308776
  0.11380000   0.00254021
  0.11380000   0.00208976
  0.11380000   0.00171920
  0.11380000   0.00141435
  0.11380000   0.00116357
  0.11380000   0.00095726
  0.11380000   0.00078753
  0.11380000   0.00064791
  0.11380000   0.00053305
  0.11380000   0.00043855
  0.11380000   0.00036082
  0.11380000   0.00029686
  0.11380000   0.00024425
  0.11380000   0.00020097
  0.11380000   0.00016536
  0.11380000   0.00013607
  0.11380000   0.00011197
  0.11380000   0.00009214
  0.11400000   0.00832730
  0.11400000   0.00685505
  0.11400000   0.00564311
  0.11400000   0.00464544
  0.11400000   0.00382417
  0.11400000   0.00314810
  0.11400000   0.00259156
  0.11400000   0.00213341
  0.11400000   0.00175627
  0.11400000   0.00144581
  0.11400000   0.00119023
  0.11400000   0.00097984
  0.11400000   0.00080665
  0.11400000   0.00066407
  0.11400000   0.00054671
  0.11400000   0.00045009
  0.11400000   0.00037055
  0.11400000   0.00030507
  0.11400000   0.00025117
  0.11400000   0.00020680
  0.11400000   0.00017027
  0.11400000   0.00014020
  0.11400000   0.00011544
  0.11400000   0.00009507
  0.11420000   0.00846196
  0.11420000   0.00697052
  0.11420000   0.00574196
  0.11420000   0.00472995
  0.11420000   0.00389631
  0.11420000   0.00320961
  0.11420000   0.00264394
  0.11420000   0.00217798
  0.11420000   0.00179415
  0.11420000   0.00147796
  0.11420000   0.00121751
  0.11420000   0.00100296
  0.11420000   0.00082623
  0.11420000   0.00068064
  0.11420000   0.00056071
  0.11420000   0.00046193
  0.11420000   0.00038055
  0.11420000   0.00031351
  0.11420000   0.00025829
  0.11420000   0.00021280
  0.11420000   0.00017533
  0.11420000   0.00014446
  0.11420000   0.00011903
  0.11420000   0.00009808
  0.11440000   0.00859879
  0.11440000   0.00708793
  0.11440000   0.00584254
  0.11440000   0.00481599
  0.11440000   0.00396982
  0.11440000   0.00327233
  0.11440000   0.00269739
  0.11440000   0.00222348
  0.11440000   0.00183284
  0.11440000   0.00151084
  0.11440000   0.00124541
  0.11440000   0.00102663
  0.11440000   0.00084628
  0.11440000   0.00069762
  0.11440000   0.00057508
  0.11440000   0.00047408
  0.11440000   0.00039081
  0.11440000   0.00032218
  0.11440000   0.00026561
  0.11440000   0.00021897
  0.11440000   0.00018053
  0.11440000   0.00014884
  0.11440000   0.00012272
  0.11440000   0.00010119
  0.11460000   0.00873784
  0.11460000   0.00720732
  0.11460000   0.00594489
  0.11460000   0.00490360
  0.11460000   0.00404471
  0.11460000   0.00333627
  0.11460000   0.00275192
  0.11460000   0.00226993
  0.11460000   0.00187237
  0.11460000   0.00154444
  0.11460000   0.00127396
  0.11460000   0.00105085
  0.11460000   0.00086682
  0.11460000   0.00071503
  0.11460000   0.00058982
  0.11460000   0.00048654
  0.11460000   0.00040136
  0.11460000   0.00033109
  0.11460000   0.00027313
  0.11460000   0.00022532
  0.11460000   0.00018589
  0.11460000   0.00015336
  0.11460000   0.00012653
  0.11460000   0.00010440
  0.11480000   0.00887915
  0.11480000   0.00732872
  0.11480000   0.00604904
  0.11480000   0.00499281
  0.11480000   0.00412102
  0.11480000   0.00340147
  0.11480000   0.00280756
  0.11480000   0.00231735
  0.11480000   0.00191275
  0.11480000   0.00157880
  0.11480000   0.00130316
  0.11480000   0.00107565
  0.11480000   0.00088786
  0.11480000   0.00073287
  0.11480000   0.00060494
  0.11480000   0.00049934
  0.11480000   0.00041219
  0.11480000   0.00034025
  0.11480000   0.00028087
  0.11480000   0.00023186
  0.11480000   0.00019141
  0.11480000   0.00015802
  0.11480000   0.00013046
  0.11480000   0.00010771
  0.11500000   0.00902274
  0.11500000   0.00745217
  0.11500000   0.00615501
  0.11500000   0.00508364
  0.11500000   0.00419877
  0.11500000   0.00346794
  0.11500000   0.00286432
  0.11500000   0.00236577
  0.11500000   0.00195400
  0.11500000   0.00161392
  0.11500000   0.00133302
  0.11500000   0.00110103
  0.11500000   0.00090941
  0.11500000   0.00075115
  0.11500000   0.00062044
  0.11500000   0.00051248
  0.11500000   0.00042331
  0.11500000   0.00034966
  0.11500000   0.00028883
  0.11500000   0.00023859
  0.11500000   0.00019709
  0.11500000   0.00016281
  0.11500000   0.00013450
  0.11500000   0.00011112
  0.11520000   0.00916865
  0.11520000   0.00757771
  0.11520000   0.00626283
  0.11520000   0.00517613
  0.11520000   0.00427799
  0.11520000   0.00353571
  0.11520000   0.00292222
  0.11520000   0.00241520
  0.11520000   0.00199615
  0.11520000   0.00164982
  0.11520000   0.00136358
  0.11520000   0.00112701
  0.11520000   0.00093149
  0.11520000   0.00076990
  0.11520000   0.00063634
  0.11520000   0.00052596
  0.11520000   0.00043473
  0.11520000   0.00035933
  0.11520000   0.00029701
  0.11520000   0.00024551
  0.11520000   0.00020294
  0.11520000   0.00016776
  0.11520000   0.00013868
  0.11520000   0.00011465
  0.11540000   0.00931693
  0.11540000   0.00770536
  0.11540000   0.00637255
  0.11540000   0.00527030
  0.11540000   0.00435871
  0.11540000   0.00360480
  0.11540000   0.00298131
  0.11540000   0.00246566
  0.11540000   0.00203920
  0.11540000   0.00168652
  0.11540000   0.00139483
  0.11540000   0.00115361
  0.11540000   0.00095410
  0.11540000   0.00078911
  0.11540000   0.00065265
  0.11540000   0.00053980
  0.11540000   0.00044646
  0.11540000   0.00036927
  0.11540000   0.00030543
  0.11540000   0.00025263
  0.11540000   0.00020897
  0.11540000   0.00017285
  0.11540000   0.00014298
  0.11540000   0.00011828
  0.11560000   0.00946761
  0.11560000   0.00783516
  0.11560000   0.00648420
  0.11560000   0.00536618
  0.11560000   0.00444095
  0.11560000   0.00367525
  0.11560000   0.00304158
  0.11560000   0.00251717
  0.11560000   0.00208319
  0.11560000   0.00172404
  0.11560000   0.00142681
  0.11560000   0.00118083
  0.11560000   0.00097726
  0.11560000   0.00080880
  0.11560000   0.00066938
  0.11560000   0.00055400
  0.11560000   0.00045851
  0.11560000   0.00037949
  0.11560000   0.00031409
  0.11560000   0.00025996
  0.11560000   0.00021517
  0.11560000   0.00017810
  0.11560000   0.00014742
  0.11560000   0.00012203
  0.11580000   0.00962072
  0.11580000   0.00796715
  0.11580000   0.00659780
  0.11580000   0.00546381
  0.11580000   0.00452474
  0.11580000   0.00374708
  0.11580000   0.00310308
  0.11580000   0.00256977
  0.11580000   0.00212812
  0.11580000   0.00176239
  0.11580000   0.00145951
  0.11580000   0.00120870
  0.11580000   0.00100099
  0.11580000   0.00082898
  0.11580000   0.00068654
  0.11580000   0.00056857
  0.11580000   0.00047088
  0.11580000   0.00038998
  0.11580000   0.00032299
  0.11580000   0.00026751
  0.11580000   0.00022156
  0.11580000   0.00018351
  0.11580000   0.00015200
  0.11580000   0.00012590
  0.11600000   0.00977632
  0.11600000   0.00810137
  0.11600000   0.00671339
  0.11600000   0.00556322
  0.11600000   0.00461012
  0.11600000   0.00382031
  0.11600000   0.00316582
  0.11600000   0.00262346
  0.11600000   0.00217403
  0.11600000   0.00180160
  0.11600000   0.00149297
  0.11600000   0.00123722
  0.11600000   0.00102529
  0.11600000   0.00084967
  0.11600000   0.00070413
  0.11600000   0.00058353
  0.11600000   0.00048359
  0.11600000   0.00040077
  0.11600000   0.00033214
  0.11600000   0.00027527
  0.11600000   0.00022814
  0.11600000   0.00018909
  0.11600000   0.00015672
  0.11600000   0.00012990
  0.11620000   0.00993444
  0.11620000   0.00823785
  0.11620000   0.00683101
  0.11620000   0.00566445
  0.11620000   0.00469711
  0.11620000   0.00389497
  0.11620000   0.00322983
  0.11620000   0.00267828
  0.11620000   0.00222093
  0.11620000   0.00184168
  0.11620000   0.00152720
  0.11620000   0.00126642
  0.11620000   0.00105018
  0.11620000   0.00087087
  0.11620000   0.00072218
  0.11620000   0.00059889
  0.11620000   0.00049664
  0.11620000   0.00041186
  0.11620000   0.00034156
  0.11620000   0.00028326
  0.11620000   0.00023492
  0.11620000   0.00019483
  0.11620000   0.00016159
  0.11620000   0.00013402
  0.11640000   0.01009511
  0.11640000   0.00837663
  0.11640000   0.00695070
  0.11640000   0.00576751
  0.11640000   0.00478574
  0.11640000   0.00397110
  0.11640000   0.00329514
  0.11640000   0.00273425
  0.11640000   0.00226883
  0.11640000   0.00188265
  0.11640000   0.00156221
  0.11640000   0.00129631
  0.11640000   0.00107568
  0.11640000   0.00089261
  0.11640000   0.00074069
  0.11640000   0.00061464
  0.11640000   0.00051005
  0.11640000   0.00042326
  0.11640000   0.00035124
  0.11640000   0.00029148
  0.11640000   0.00024189
  0.11640000   0.00020075
  0.11640000   0.00016660
  0.11640000   0.00013827
  0.11660000   0.01025839
  0.11660000   0.00851775
  0.11660000   0.00707248
  0.11660000   0.00587245
  0.11660000   0.00487605
  0.11660000   0.00404871
  0.11660000   0.00336177
  0.11660000   0.00279138
  0.11660000   0.00231778
  0.11660000   0.00192454
  0.11660000   0.00159802
  0.11660000   0.00132691
  0.11660000   0.00110180
  0.11660000   0.00091488
  0.11660000   0.00075968
  0.11660000   0.00063082
  0.11660000   0.00052381
  0.11660000   0.00043497
  0.11660000   0.00036120
  0.11660000   0.00029994
  0.11660000   0.00024908
  0.11660000   0.00020685
  0.11660000   0.00017178
  0.11660000   0.00014266
  0.11680000   0.01042431
  0.11680000   0.00866126
  0.11680000   0.00719640
  0.11680000   0.00597930
  0.11680000   0.00496806
  0.11680000   0.00412785
  0.11680000   0.00342974
  0.11680000   0.00284971
  0.11680000   0.00236778
  0.11680000   0.00196736
  0.11680000   0.00163466
  0.11680000   0.00135823
  0.11680000   0.00112855
  0.11680000   0.00093772
  0.11680000   0.00077916
  0.11680000   0.00064741
  0.11680000   0.00053795
  0.11680000   0.00044700
  0.11680000   0.00037144
  0.11680000   0.00030865
  0.11680000   0.00025648
  0.11680000   0.00021313
  0.11680000   0.00017711
  0.11680000   0.00014719
  0.11700000   0.01059291
  0.11700000   0.00880718
  0.11700000   0.00732249
  0.11700000   0.00608810
  0.11700000   0.00506181
  0.11700000   0.00420853
  0.11700000   0.00349910
  0.11700000   0.00290926
  0.11700000   0.00241886
  0.11700000   0.00201113
  0.11700000   0.00167213
  0.11700000   0.00139029
  0.11700000   0.00115595
  0.11700000   0.00096112
  0.11700000   0.00079913
  0.11700000   0.00066445
  0.11700000   0.00055247
  0.11700000   0.00045937
  0.11700000   0.00038196
  0.11700000   0.00031761
  0.11700000   0.00026410
  0.11700000   0.00021960
  0.11700000   0.00018261
  0.11700000   0.00015186
  0.11720000   0.01076425
  0.11720000   0.00895557
  0.11720000   0.00745080
  0.11720000   0.00619888
  0.11720000   0.00515733
  0.11720000   0.00429079
  0.11720000   0.00356985
  0.11720000   0.00297006
  0.11720000   0.00247104
  0.11720000   0.00205588
  0.11720000   0.00171047
  0.11720000   0.00142310
  0.11720000   0.00118402
  0.11720000   0.00098511
  0.11720000   0.00081962
  0.11720000   0.00068194
  0.11720000   0.00056739
  0.11720000   0.00047208
  0.11720000   0.00039279
  0.11720000   0.00032683
  0.11720000   0.00027194
  0.11720000   0.00022628
  0.11720000   0.00018829
  0.11720000   0.00015668
  0.11740000   0.01093836
  0.11740000   0.00910645
  0.11740000   0.00758135
  0.11740000   0.00631168
  0.11740000   0.00525465
  0.11740000   0.00437466
  0.11740000   0.00364204
  0.11740000   0.00303212
  0.11740000   0.00252435
  0.11740000   0.00210162
  0.11740000   0.00174969
  0.11740000   0.00145670
  0.11740000   0.00121277
  0.11740000   0.00100970
  0.11740000   0.00084063
  0.11740000   0.00069988
  0.11740000   0.00058270
  0.11740000   0.00048515
  0.11740000   0.00040393
  0.11740000   0.00033631
  0.11740000   0.00028002
  0.11740000   0.00023315
  0.11740000   0.00019413
  0.11740000   0.00016165
  0.11760000   0.01111529
  0.11760000   0.00925988
  0.11760000   0.00771420
  0.11760000   0.00642653
  0.11760000   0.00535382
  0.11760000   0.00446017
  0.11760000   0.00371569
  0.11760000   0.00309549
  0.11760000   0.00257881
  0.11760000   0.00214839
  0.11760000   0.00178981
  0.11760000   0.00149108
  0.11760000   0.00124222
  0.11760000   0.00103490
  0.11760000   0.00086219
  0.11760000   0.00071830
  0.11760000   0.00059843
  0.11760000   0.00049857
  0.11760000   0.00041538
  0.11760000   0.00034608
  0.11760000   0.00028834
  0.11760000   0.00024024
  0.11760000   0.00020016
  0.11780000   0.01129509
  0.11780000   0.00941590
  0.11780000   0.00784937
  0.11780000   0.00654348
  0.11780000   0.00545486
  0.11780000   0.00454735
  0.11780000   0.00379083
  0.11780000   0.00316018
  0.11780000   0.00263445
  0.11780000   0.00219619
  0.11780000   0.00183084
  0.11780000   0.00152628
  0.11780000   0.00127239
  0.11780000   0.00106073
  0.11780000   0.00088429
  0.11780000   0.00073721
  0.11780000   0.00061459
  0.11780000   0.00051237
  0.11780000   0.00042716
  0.11780000   0.00035612
  0.11780000   0.00029691
  0.11780000   0.00024754
  0.11780000   0.00020638
  0.11800000   0.01147779
  0.11800000   0.00957455
  0.11800000   0.00798692
  0.11800000   0.00666256
  0.11800000   0.00555780
  0.11800000   0.00463624
  0.11800000   0.00386750
  0.11800000   0.00322623
  0.11800000   0.00269129
  0.11800000   0.00224506
  0.11800000   0.00187282
  0.11800000   0.00156231
  0.11800000   0.00130329
  0.11800000   0.00108721
  0.11800000   0.00090697
  0.11800000   0.00075661
  0.11800000   0.00063118
  0.11800000   0.00052655
  0.11800000   0.00043927
  0.11800000   0.00036646
  0.11800000   0.00030573
  0.11800000   0.00025506
  0.11800000   0.00021280
  0.11820000   0.01166345
  0.11820000   0.00973588
  0.11820000   0.00812688
  0.11820000   0.00678380
  0.11820000   0.00566269
  0.11820000   0.00472687
  0.11820000   0.00394571
  0.11820000   0.00329365
  0.11820000   0.00274936
  0.11820000   0.00229502
  0.11820000   0.00191577
  0.11820000   0.00159919
  0.11820000   0.00133494
  0.11820000   0.00111435
  0.11820000   0.00093022
  0.11820000   0.00077652
  0.11820000   0.00064822
  0.11820000   0.00054113
  0.11820000   0.00045173
  0.11820000   0.00037710
  0.11820000   0.00031481
  0.11820000   0.00026281
  0.11820000   0.00021941
  0.11840000   0.01185212
  0.11840000   0.00989993
  0.11840000   0.00826929
  0.11840000   0.00690725
  0.11840000   0.00576956
  0.11840000   0.00481927
  0.11840000   0.00402551
  0.11840000   0.00336249
  0.11840000   0.00280868
  0.11840000   0.00234609
  0.11840000   0.00195970
  0.11840000   0.00163695
  0.11840000   0.00136736
  0.11840000   0.00114217
  0.11840000   0.00095407
  0.11840000   0.00079696
  0.11840000   0.00066572
  0.11840000   0.00055610
  0.11840000   0.00046454
  0.11840000   0.00038805
  0.11840000   0.00032417
  0.11840000   0.00027080
  0.11840000   0.00022622
  0.11860000   0.01204385
  0.11860000   0.01006674
  0.11860000   0.00841420
  0.11860000   0.00703295
  0.11860000   0.00587846
  0.11860000   0.00491348
  0.11860000   0.00410692
  0.11860000   0.00343277
  0.11860000   0.00286928
  0.11860000   0.00239830
  0.11860000   0.00200463
  0.11860000   0.00167559
  0.11860000   0.00140056
  0.11860000   0.00117068
  0.11860000   0.00097854
  0.11860000   0.00081794
  0.11860000   0.00068370
  0.11860000   0.00057150
  0.11860000   0.00047771
  0.11860000   0.00039932
  0.11860000   0.00033380
  0.11860000   0.00027903
  0.11860000   0.00023325
  0.11880000   0.01223868
  0.11880000   0.01023637
  0.11880000   0.00856166
  0.11880000   0.00716095
  0.11880000   0.00598940
  0.11880000   0.00500954
  0.11880000   0.00418998
  0.11880000   0.00350452
  0.11880000   0.00293120
  0.11880000   0.00245167
  0.11880000   0.00205060
  0.11880000   0.00171515
  0.11880000   0.00143458
  0.11880000   0.00119991
  0.11880000   0.00100363
  0.11880000   0.00083947
  0.11880000   0.00070216
  0.11880000   0.00058731
  0.11880000   0.00049126
  0.11880000   0.00041092
  0.11880000   0.00034372
  0.11880000   0.00028751
  0.11880000   0.00024050
  0.11900000   0.01243666
  0.11900000   0.01040885
  0.11900000   0.00871170
  0.11900000   0.00729127
  0.11900000   0.00610245
  0.11900000   0.00510747
  0.11900000   0.00427473
  0.11900000   0.00357776
  0.11900000   0.00299444
  0.11900000   0.00250623
  0.11900000   0.00209763
  0.11900000   0.00175564
  0.11900000   0.00146942
  0.11900000   0.00122987
  0.11900000   0.00102937
  0.11900000   0.00086156
  0.11900000   0.00072112
  0.11900000   0.00060357
  0.11900000   0.00050519
  0.11900000   0.00042285
  0.11900000   0.00035393
  0.11900000   0.00029625
  0.11900000   0.00024798
  0.11920000   0.01263785
  0.11920000   0.01058425
  0.11920000   0.00886437
  0.11920000   0.00742397
  0.11920000   0.00621763
  0.11920000   0.00520732
  0.11920000   0.00436119
  0.11920000   0.00365255
  0.11920000   0.00305906
  0.11920000   0.00256201
  0.11920000   0.00214573
  0.11920000   0.00179709
  0.11920000   0.00150511
  0.11920000   0.00126057
  0.11920000   0.00105577
  0.11920000   0.00088424
  0.11920000   0.00074059
  0.11920000   0.00062028
  0.11920000   0.00051952
  0.11920000   0.00043513
  0.11920000   0.00036445
  0.11920000   0.00030526
  0.11920000   0.00025568
  0.11940000   0.01284230
  0.11940000   0.01076261
  0.11940000   0.00901972
  0.11940000   0.00755908
  0.11940000   0.00633498
  0.11940000   0.00530912
  0.11940000   0.00444939
  0.11940000   0.00372889
  0.11940000   0.00312507
  0.11940000   0.00261903
  0.11940000   0.00219494
  0.11940000   0.00183953
  0.11940000   0.00154167
  0.11940000   0.00129204
  0.11940000   0.00108284
  0.11940000   0.00090752
  0.11940000   0.00076059
  0.11940000   0.00063745
  0.11940000   0.00053425
  0.11940000   0.00044777
  0.11940000   0.00037528
  0.11940000   0.00031454
  0.11940000   0.00026363
  0.11960000   0.01305005
  0.11960000   0.01094397
  0.11960000   0.00917779
  0.11960000   0.00769666
  0.11960000   0.00645456
  0.11960000   0.00541292
  0.11960000   0.00453939
  0.11960000   0.00380684
  0.11960000   0.00319250
  0.11960000   0.00267732
  0.11960000   0.00224528
  0.11960000   0.00188296
  0.11960000   0.00157911
  0.11960000   0.00132430
  0.11960000   0.00111061
  0.11960000   0.00093141
  0.11960000   0.00078113
  0.11960000   0.00065510
  0.11960000   0.00054941
  0.11960000   0.00046077
  0.11960000   0.00038644
  0.11960000   0.00032410
  0.11960000   0.00027182
  0.11980000   0.01326118
  0.11980000   0.01112839
  0.11980000   0.00933864
  0.11980000   0.00783674
  0.11980000   0.00657639
  0.11980000   0.00551875
  0.11980000   0.00463121
  0.11980000   0.00388641
  0.11980000   0.00326140
  0.11980000   0.00273691
  0.11980000   0.00229677
  0.11980000   0.00192742
  0.11980000   0.00161747
  0.11980000   0.00135737
  0.11980000   0.00113910
  0.11980000   0.00095593
  0.11980000   0.00080222
  0.11980000   0.00067323
  0.11980000   0.00056499
  0.11980000   0.00047415
  0.11980000   0.00039792
  0.11980000   0.00033395
  0.11980000   0.00028027
  0.12000000   0.01347571
  0.12000000   0.01131593
  0.12000000   0.00950231
  0.12000000   0.00797937
  0.12000000   0.00670052
  0.12000000   0.00562664
  0.12000000   0.00472488
  0.12000000   0.00396765
  0.12000000   0.00333178
  0.12000000   0.00279782
  0.12000000   0.00234944
  0.12000000   0.00197293
  0.12000000   0.00165676
  0.12000000   0.00139126
  0.12000000   0.00116831
  0.12000000   0.00098110
  0.12000000   0.00082389
  0.12000000   0.00069187
  0.12000000   0.00058101
  0.12000000   0.00048792
  0.12000000   0.00040975
  0.12000000   0.00034411
  0.12000000   0.00028898
  0.12020000   0.01369373
  0.12020000   0.01150662
  0.12020000   0.00966885
  0.12020000   0.00812460
  0.12020000   0.00682700
  0.12020000   0.00573665
  0.12020000   0.00482045
  0.12020000   0.00405059
  0.12020000   0.00340368
  0.12020000   0.00286009
  0.12020000   0.00240333
  0.12020000   0.00201951
  0.12020000   0.00169700
  0.12020000   0.00142600
  0.12020000   0.00119828
  0.12020000   0.00100693
  0.12020000   0.00084614
  0.12020000   0.00071103
  0.12020000   0.00059750
  0.12020000   0.00050210
  0.12020000   0.00042193
  0.12020000   0.00035457
  0.12020000   0.00029797
  0.12040000   0.01391527
  0.12040000   0.01170054
  0.12040000   0.00983831
  0.12040000   0.00827248
  0.12040000   0.00695587
  0.12040000   0.00584882
  0.12040000   0.00491796
  0.12040000   0.00413526
  0.12040000   0.00347713
  0.12040000   0.00292375
  0.12040000   0.00245845
  0.12040000   0.00206720
  0.12040000   0.00173822
  0.12040000   0.00146161
  0.12040000   0.00122901
  0.12040000   0.00103344
  0.12040000   0.00086899
  0.12040000   0.00073071
  0.12040000   0.00061444
  0.12040000   0.00051668
  0.12040000   0.00043447
  0.12040000   0.00036535
  0.12040000   0.00030723
  0.12060000   0.01414040
  0.12060000   0.01189772
  0.12060000   0.01001074
  0.12060000   0.00842305
  0.12060000   0.00708717
  0.12060000   0.00596317
  0.12060000   0.00501744
  0.12060000   0.00422171
  0.12060000   0.00355217
  0.12060000   0.00298883
  0.12060000   0.00251484
  0.12060000   0.00211602
  0.12060000   0.00178045
  0.12060000   0.00149810
  0.12060000   0.00126054
  0.12060000   0.00106065
  0.12060000   0.00089246
  0.12060000   0.00075095
  0.12060000   0.00063187
  0.12060000   0.00053169
  0.12060000   0.00044739
  0.12060000   0.00037646
  0.12060000   0.00031678
  0.12080000   0.01436918
  0.12080000   0.01209823
  0.12080000   0.01018620
  0.12080000   0.00857637
  0.12080000   0.00722096
  0.12080000   0.00607977
  0.12080000   0.00511894
  0.12080000   0.00430996
  0.12080000   0.00362884
  0.12080000   0.00305536
  0.12080000   0.00257252
  0.12080000   0.00216598
  0.12080000   0.00182370
  0.12080000   0.00153551
  0.12080000   0.00129287
  0.12080000   0.00108857
  0.12080000   0.00091656
  0.12080000   0.00077174
  0.12080000   0.00064980
  0.12080000   0.00054713
  0.12080000   0.00046069
  0.12080000   0.00038791
  0.12080000   0.00032663
  0.12100000   0.01460166
  0.12100000   0.01230212
  0.12100000   0.01036474
  0.12100000   0.00873247
  0.12100000   0.00735727
  0.12100000   0.00619864
  0.12100000   0.00522249
  0.12100000   0.00440006
  0.12100000   0.00370715
  0.12100000   0.00312337
  0.12100000   0.00263152
  0.12100000   0.00221713
  0.12100000   0.00186800
  0.12100000   0.00157386
  0.12100000   0.00132603
  0.12100000   0.00111723
  0.12100000   0.00094132
  0.12100000   0.00079311
  0.12100000   0.00066823
  0.12100000   0.00056303
  0.12100000   0.00047439
  0.12100000   0.00039971
  0.12100000   0.00033679
  0.12120000   0.01483790
  0.12120000   0.01250945
  0.12120000   0.01054641
  0.12120000   0.00889142
  0.12120000   0.00749616
  0.12120000   0.00631985
  0.12120000   0.00532813
  0.12120000   0.00449205
  0.12120000   0.00378716
  0.12120000   0.00319290
  0.12120000   0.00269188
  0.12120000   0.00226949
  0.12120000   0.00191339
  0.12120000   0.00161316
  0.12120000   0.00136005
  0.12120000   0.00114665
  0.12120000   0.00096674
  0.12120000   0.00081507
  0.12120000   0.00068719
  0.12120000   0.00057938
  0.12120000   0.00048849
  0.12120000   0.00041186
  0.12120000   0.00034726
  0.12140000   0.01507797
  0.12140000   0.01272028
  0.12140000   0.01073126
  0.12140000   0.00905327
  0.12140000   0.00763767
  0.12140000   0.00644342
  0.12140000   0.00543592
  0.12140000   0.00458596
  0.12140000   0.00386890
  0.12140000   0.00326397
  0.12140000   0.00275363
  0.12140000   0.00232309
  0.12140000   0.00195987
  0.12140000   0.00165344
  0.12140000   0.00139493
  0.12140000   0.00117685
  0.12140000   0.00099286
  0.12140000   0.00083764
  0.12140000   0.00070669
  0.12140000   0.00059622
  0.12140000   0.00050302
  0.12140000   0.00042439
  0.12140000   0.00035805
  0.12160000   0.01532193
  0.12160000   0.01293466
  0.12160000   0.01091936
  0.12160000   0.00921807
  0.12160000   0.00778185
  0.12160000   0.00656941
  0.12160000   0.00554589
  0.12160000   0.00468183
  0.12160000   0.00395240
  0.12160000   0.00333663
  0.12160000   0.00281679
  0.12160000   0.00237795
  0.12160000   0.00200748
  0.12160000   0.00169474
  0.12160000   0.00143072
  0.12160000   0.00120783
  0.12160000   0.00101968
  0.12160000   0.00086083
  0.12160000   0.00072674
  0.12160000   0.00061354
  0.12160000   0.00051797
  0.12160000   0.00043729
  0.12160000   0.00036919
  0.12180000   0.01556984
  0.12180000   0.01315266
  0.12180000   0.01111076
  0.12180000   0.00938586
  0.12180000   0.00792876
  0.12180000   0.00669787
  0.12180000   0.00565808
  0.12180000   0.00477971
  0.12180000   0.00403771
  0.12180000   0.00341090
  0.12180000   0.00288141
  0.12180000   0.00243411
  0.12180000   0.00205626
  0.12180000   0.00173706
  0.12180000   0.00146742
  0.12180000   0.00123964
  0.12180000   0.00104722
  0.12180000   0.00088467
  0.12180000   0.00074736
  0.12180000   0.00063136
  0.12180000   0.00053337
  0.12180000   0.00045060
  0.12180000   0.00038067
  0.12200000   0.01582176
  0.12200000   0.01337434
  0.12200000   0.01130551
  0.12200000   0.00955672
  0.12200000   0.00807845
  0.12200000   0.00682885
  0.12200000   0.00577255
  0.12200000   0.00487964
  0.12200000   0.00412486
  0.12200000   0.00348683
  0.12200000   0.00294750
  0.12200000   0.00249160
  0.12200000   0.00210621
  0.12200000   0.00178044
  0.12200000   0.00150507
  0.12200000   0.00127228
  0.12200000   0.00107551
  0.12200000   0.00090917
  0.12200000   0.00076856
  0.12200000   0.00064971
  0.12200000   0.00054923
  0.12200000   0.00046430
  0.12200000   0.00039251
  0.12220000   0.01607776
  0.12220000   0.01359975
  0.12220000   0.01150368
  0.12220000   0.00973068
  0.12220000   0.00823096
  0.12220000   0.00696238
  0.12220000   0.00588933
  0.12220000   0.00498166
  0.12220000   0.00421389
  0.12220000   0.00356446
  0.12220000   0.00301512
  0.12220000   0.00255044
  0.12220000   0.00215739
  0.12220000   0.00182491
  0.12220000   0.00154368
  0.12220000   0.00130579
  0.12220000   0.00110456
  0.12220000   0.00093435
  0.12220000   0.00079037
  0.12220000   0.00066858
  0.12220000   0.00056556
  0.12220000   0.00047842
  0.12220000   0.00040471
  0.12240000   0.01633791
  0.12240000   0.01382897
  0.12240000   0.01170533
  0.12240000   0.00990782
  0.12240000   0.00838635
  0.12240000   0.00709853
  0.12240000   0.00600848
  0.12240000   0.00508582
  0.12240000   0.00430485
  0.12240000   0.00364381
  0.12240000   0.00308428
  0.12240000   0.00261068
  0.12240000   0.00220981
  0.12240000   0.00187049
  0.12240000   0.00158328
  0.12240000   0.00134018
  0.12240000   0.00113440
  0.12240000   0.00096023
  0.12240000   0.00081280
  0.12240000   0.00068801
  0.12240000   0.00058238
  0.12240000   0.00049298
  0.12240000   0.00041730
  0.12260000   0.01660226
  0.12260000   0.01406205
  0.12260000   0.01191052
  0.12260000   0.01008818
  0.12260000   0.00854468
  0.12260000   0.00723734
  0.12260000   0.00613004
  0.12260000   0.00519215
  0.12260000   0.00439777
  0.12260000   0.00372493
  0.12260000   0.00315504
  0.12260000   0.00267234
  0.12260000   0.00226350
  0.12260000   0.00191721
  0.12260000   0.00162390
  0.12260000   0.00137547
  0.12260000   0.00116505
  0.12260000   0.00098682
  0.12260000   0.00083586
  0.12260000   0.00070800
  0.12260000   0.00059970
  0.12260000   0.00050797
  0.12260000   0.00043028
  0.12280000   0.01687090
  0.12280000   0.01429907
  0.12280000   0.01211930
  0.12280000   0.01027183
  0.12280000   0.00870600
  0.12280000   0.00737888
  0.12280000   0.00625406
  0.12280000   0.00530071
  0.12280000   0.00449270
  0.12280000   0.00380786
  0.12280000   0.00322742
  0.12280000   0.00273546
  0.12280000   0.00231850
  0.12280000   0.00196509
  0.12280000   0.00166556
  0.12280000   0.00141169
  0.12280000   0.00119652
  0.12280000   0.00101415
  0.12280000   0.00085958
  0.12280000   0.00072857
  0.12280000   0.00061754
  0.12280000   0.00052342
  0.12280000   0.00044366
  0.12300000   0.01714389
  0.12300000   0.01454008
  0.12300000   0.01233175
  0.12300000   0.01045883
  0.12300000   0.00887037
  0.12300000   0.00752318
  0.12300000   0.00638059
  0.12300000   0.00541155
  0.12300000   0.00458968
  0.12300000   0.00389264
  0.12300000   0.00330146
  0.12300000   0.00280007
  0.12300000   0.00237483
  0.12300000   0.00201418
  0.12300000   0.00170830
  0.12300000   0.00144887
  0.12300000   0.00122885
  0.12300000   0.00104224
  0.12300000   0.00088398
  0.12300000   0.00074975
  0.12300000   0.00063590
  0.12300000   0.00053935
  0.12300000   0.00045746
  0.12320000   0.01742130
  0.12320000   0.01478516
  0.12320000   0.01254792
  0.12320000   0.01064923
  0.12320000   0.00903785
  0.12320000   0.00767030
  0.12320000   0.00650969
  0.12320000   0.00552470
  0.12320000   0.00468875
  0.12320000   0.00397930
  0.12320000   0.00337720
  0.12320000   0.00286621
  0.12320000   0.00243254
  0.12320000   0.00206449
  0.12320000   0.00175213
  0.12320000   0.00148703
  0.12320000   0.00126205
  0.12320000   0.00107111
  0.12320000   0.00090906
  0.12320000   0.00077153
  0.12320000   0.00065481
  0.12320000   0.00055576
  0.12320000   0.00047169
  0.12340000   0.01770320
  0.12340000   0.01503437
  0.12340000   0.01276789
  0.12340000   0.01084310
  0.12340000   0.00920849
  0.12340000   0.00782030
  0.12340000   0.00664140
  0.12340000   0.00564021
  0.12340000   0.00478997
  0.12340000   0.00406790
  0.12340000   0.00345468
  0.12340000   0.00293391
  0.12340000   0.00249165
  0.12340000   0.00211605
  0.12340000   0.00179708
  0.12340000   0.00152620
  0.12340000   0.00129615
  0.12340000   0.00110078
  0.12340000   0.00093486
  0.12340000   0.00079395
  0.12340000   0.00067429
  0.12340000   0.00057266
  0.12340000   0.00048636
  0.12360000   0.01798967
  0.12360000   0.01528778
  0.12360000   0.01299171
  0.12360000   0.01104050
  0.12360000   0.00938235
  0.12360000   0.00797324
  0.12360000   0.00677577
  0.12360000   0.00575815
  0.12360000   0.00489337
  0.12360000   0.00415847
  0.12360000   0.00353394
  0.12360000   0.00300321
  0.12360000   0.00255219
  0.12360000   0.00216891
  0.12360000   0.00184319
  0.12360000   0.00156639
  0.12360000   0.00133117
  0.12360000   0.00113127
  0.12360000   0.00096139
  0.12360000   0.00081703
  0.12360000   0.00069434
  0.12360000   0.00059009
  0.12360000   0.00050149
  0.12380000   0.01828077
  0.12380000   0.01554547
  0.12380000   0.01321947
  0.12380000   0.01124150
  0.12380000   0.00955950
  0.12380000   0.00812918
  0.12380000   0.00691287
  0.12380000   0.00587855
  0.12380000   0.00499900
  0.12380000   0.00425105
  0.12380000   0.00361502
  0.12380000   0.00307415
  0.12380000   0.00261421
  0.12380000   0.00222309
  0.12380000   0.00189049
  0.12380000   0.00160765
  0.12380000   0.00136713
  0.12380000   0.00116260
  0.12380000   0.00098868
  0.12380000   0.00084077
  0.12380000   0.00071500
  0.12380000   0.00060804
  0.12380000   0.00051709
  0.12400000   0.01857659
  0.12400000   0.01580751
  0.12400000   0.01345121
  0.12400000   0.01144616
  0.12400000   0.00974000
  0.12400000   0.00828816
  0.12400000   0.00705274
  0.12400000   0.00600148
  0.12400000   0.00510692
  0.12400000   0.00434571
  0.12400000   0.00369796
  0.12400000   0.00314677
  0.12400000   0.00267774
  0.12400000   0.00227862
  0.12400000   0.00193900
  0.12400000   0.00165000
  0.12400000   0.00140407
  0.12400000   0.00119481
  0.12400000   0.00101674
  0.12400000   0.00086521
  0.12400000   0.00073626
  0.12400000   0.00062654
  0.12400000   0.00053317
  0.12420000   0.01887719
  0.12420000   0.01607396
  0.12420000   0.01368702
  0.12420000   0.01165455
  0.12420000   0.00992390
  0.12420000   0.00845026
  0.12420000   0.00719544
  0.12420000   0.00612697
  0.12420000   0.00521717
  0.12420000   0.00444247
  0.12420000   0.00378280
  0.12420000   0.00322110
  0.12420000   0.00274281
  0.12420000   0.00233554
  0.12420000   0.00198875
  0.12420000   0.00169346
  0.12420000   0.00144201
  0.12420000   0.00122791
  0.12420000   0.00104559
  0.12420000   0.00089035
  0.12420000   0.00075816
  0.12420000   0.00064560
  0.12420000   0.00054976
  0.12440000   0.01918267
  0.12440000   0.01634491
  0.12440000   0.01392697
  0.12440000   0.01186674
  0.12440000   0.01011128
  0.12440000   0.00861552
  0.12440000   0.00734104
  0.12440000   0.00625509
  0.12440000   0.00532980
  0.12440000   0.00454138
  0.12440000   0.00386960
  0.12440000   0.00329719
  0.12440000   0.00280946
  0.12440000   0.00239389
  0.12440000   0.00203978
  0.12440000   0.00173806
  0.12440000   0.00148098
  0.12440000   0.00126192
  0.12440000   0.00107527
  0.12440000   0.00091623
  0.12440000   0.00078072
  0.12440000   0.00066525
  0.12440000   0.00056686
  0.12460000   0.01949309
  0.12460000   0.01662043
  0.12460000   0.01417113
  0.12460000   0.01208279
  0.12460000   0.01030220
  0.12460000   0.00878403
  0.12460000   0.00748958
  0.12460000   0.00638590
  0.12460000   0.00544486
  0.12460000   0.00464250
  0.12460000   0.00395838
  0.12460000   0.00337508
  0.12460000   0.00287774
  0.12460000   0.00245369
  0.12460000   0.00209213
  0.12460000   0.00178385
  0.12460000   0.00152100
  0.12460000   0.00129688
  0.12460000   0.00110579
  0.12460000   0.00094286
  0.12460000   0.00080394
  0.12460000   0.00068549
  0.12460000   0.00058450
  0.12480000   0.01980853
  0.12480000   0.01690060
  0.12480000   0.01441957
  0.12480000   0.01230277
  0.12480000   0.01049673
  0.12480000   0.00895583
  0.12480000   0.00764113
  0.12480000   0.00651944
  0.12480000   0.00556241
  0.12480000   0.00474587
  0.12480000   0.00404921
  0.12480000   0.00345481
  0.12480000   0.00294768
  0.12480000   0.00251499
  0.12480000   0.00214581
  0.12480000   0.00183084
  0.12480000   0.00156210
  0.12480000   0.00133281
  0.12480000   0.00113718
  0.12480000   0.00097027
  0.12480000   0.00082786
  0.12480000   0.00070635
  0.12480000   0.00060268
  0.12500000   0.02012909
  0.12500000   0.01718549
  0.12500000   0.01467237
  0.12500000   0.01252677
  0.12500000   0.01069494
  0.12500000   0.00913099
  0.12500000   0.00779575
  0.12500000   0.00665577
  0.12500000   0.00568250
  0.12500000   0.00485155
  0.12500000   0.00414212
  0.12500000   0.00353643
  0.12500000   0.00301931
  0.12500000   0.00257782
  0.12500000   0.00220088
  0.12500000   0.00187906
  0.12500000   0.00160431
  0.12500000   0.00136973
  0.12500000   0.00116946
  0.12500000   0.00099847
  0.12500000   0.00085248
  0.12500000   0.00072785
  0.12500000   0.00062143
  0.12520000   0.02045483
  0.12520000   0.01747519
  0.12520000   0.01492960
  0.12520000   0.01275484
  0.12520000   0.01089689
  0.12520000   0.00930958
  0.12520000   0.00795350
  0.12520000   0.00679496
  0.12520000   0.00580518
  0.12520000   0.00495958
  0.12520000   0.00423716
  0.12520000   0.00361998
  0.12520000   0.00309269
  0.12520000   0.00264222
  0.12520000   0.00225736
  0.12520000   0.00192856
  0.12520000   0.00164766
  0.12520000   0.00140768
  0.12520000   0.00120265
  0.12520000   0.00102749
  0.12520000   0.00087784
  0.12520000   0.00074999
  0.12520000   0.00064077
  0.12540000   0.02078585
  0.12540000   0.01776977
  0.12540000   0.01519135
  0.12540000   0.01298707
  0.12540000   0.01110265
  0.12540000   0.00949167
  0.12540000   0.00811444
  0.12540000   0.00693706
  0.12540000   0.00593051
  0.12540000   0.00507002
  0.12540000   0.00433439
  0.12540000   0.00370550
  0.12540000   0.00316786
  0.12540000   0.00270823
  0.12540000   0.00231529
  0.12540000   0.00197937
  0.12540000   0.00169219
  0.12540000   0.00144668
  0.12540000   0.00123679
  0.12540000   0.00105736
  0.12540000   0.00090396
  0.12540000   0.00077282
  0.12540000   0.00066071
  0.12560000   0.02112223
  0.12560000   0.01806932
  0.12560000   0.01545768
  0.12560000   0.01322353
  0.12560000   0.01131230
  0.12560000   0.00967732
  0.12560000   0.00827864
  0.12560000   0.00708213
  0.12560000   0.00605856
  0.12560000   0.00518292
  0.12560000   0.00443385
  0.12560000   0.00379304
  0.12560000   0.00324485
  0.12560000   0.00277589
  0.12560000   0.00237471
  0.12560000   0.00203151
  0.12560000   0.00173792
  0.12560000   0.00148676
  0.12560000   0.00127190
  0.12560000   0.00108809
  0.12560000   0.00093085
  0.12560000   0.00079634
  0.12560000   0.00068126
  0.12580000   0.02146405
  0.12580000   0.01837392
  0.12580000   0.01572869
  0.12580000   0.01346430
  0.12580000   0.01152592
  0.12580000   0.00986660
  0.12580000   0.00844617
  0.12580000   0.00723024
  0.12580000   0.00618936
  0.12580000   0.00529834
  0.12580000   0.00453559
  0.12580000   0.00388265
  0.12580000   0.00332371
  0.12580000   0.00284524
  0.12580000   0.00243565
  0.12580000   0.00208503
  0.12580000   0.00178489
  0.12580000   0.00152795
  0.12580000   0.00130801
  0.12580000   0.00111972
  0.12580000   0.00095855
  0.12580000   0.00082057
  0.12580000   0.00070246
  0.12600000   0.02181141
  0.12600000   0.01868366
  0.12600000   0.01600446
  0.12600000   0.01370946
  0.12600000   0.01174357
  0.12600000   0.01005959
  0.12600000   0.00861709
  0.12600000   0.00738145
  0.12600000   0.00632300
  0.12600000   0.00541632
  0.12600000   0.00463967
  0.12600000   0.00397438
  0.12600000   0.00340450
  0.12600000   0.00291633
  0.12600000   0.00249816
  0.12600000   0.00213996
  0.12600000   0.00183313
  0.12600000   0.00157029
  0.12600000   0.00134514
  0.12600000   0.00115227
  0.12600000   0.00098707
  0.12600000   0.00084555
  0.12600000   0.00072432
  0.12620000   0.02216439
  0.12620000   0.01899863
  0.12620000   0.01628506
  0.12620000   0.01395908
  0.12620000   0.01196533
  0.12620000   0.01025635
  0.12620000   0.00879147
  0.12620000   0.00753582
  0.12620000   0.00645952
  0.12620000   0.00553694
  0.12620000   0.00474614
  0.12620000   0.00406828
  0.12620000   0.00348724
  0.12620000   0.00298919
  0.12620000   0.00256228
  0.12620000   0.00219634
  0.12620000   0.00188267
  0.12620000   0.00161380
  0.12620000   0.00138333
  0.12620000   0.00118577
  0.12620000   0.00101643
  0.12620000   0.00087128
  0.12620000   0.00074686
  0.12640000   0.02252309
  0.12640000   0.01931891
  0.12640000   0.01657058
  0.12640000   0.01421325
  0.12640000   0.01219128
  0.12640000   0.01045697
  0.12640000   0.00896938
  0.12640000   0.00769343
  0.12640000   0.00659899
  0.12640000   0.00566025
  0.12640000   0.00485505
  0.12640000   0.00416440
  0.12640000   0.00357200
  0.12640000   0.00306388
  0.12640000   0.00262804
  0.12640000   0.00225421
  0.12640000   0.00193355
  0.12640000   0.00165851
  0.12640000   0.00142260
  0.12640000   0.00122024
  0.12640000   0.00104668
  0.12640000   0.00089780
  0.12640000   0.00077010
  0.12660000   0.02288759
  0.12660000   0.01964458
  0.12660000   0.01686111
  0.12660000   0.01447205
  0.12660000   0.01242150
  0.12660000   0.01066151
  0.12660000   0.00915090
  0.12660000   0.00785433
  0.12660000   0.00674147
  0.12660000   0.00578630
  0.12660000   0.00496646
  0.12660000   0.00426279
  0.12660000   0.00365883
  0.12660000   0.00314043
  0.12660000   0.00269549
  0.12660000   0.00231360
  0.12660000   0.00198581
  0.12660000   0.00170447
  0.12660000   0.00146298
  0.12660000   0.00125572
  0.12660000   0.00107782
  0.12660000   0.00092513
  0.12660000   0.00079407
  0.12680000   0.02325799
  0.12680000   0.01997576
  0.12680000   0.01715674
  0.12680000   0.01473556
  0.12680000   0.01265607
  0.12680000   0.01087005
  0.12680000   0.00933609
  0.12680000   0.00801859
  0.12680000   0.00688703
  0.12680000   0.00591516
  0.12680000   0.00508044
  0.12680000   0.00436351
  0.12680000   0.00374776
  0.12680000   0.00321890
  0.12680000   0.00276468
  0.12680000   0.00237455
  0.12680000   0.00203948
  0.12680000   0.00175169
  0.12680000   0.00150452
  0.12680000   0.00129223
  0.12680000   0.00110989
  0.12680000   0.00095329
  0.12680000   0.00081878
  0.12700000   0.02363440
  0.12700000   0.02031251
  0.12700000   0.01745755
  0.12700000   0.01500387
  0.12700000   0.01289508
  0.12700000   0.01108268
  0.12700000   0.00952502
  0.12700000   0.00818630
  0.12700000   0.00703574
  0.12700000   0.00604689
  0.12700000   0.00519703
  0.12700000   0.00446661
  0.12700000   0.00383886
  0.12700000   0.00329933
  0.12700000   0.00283564
  0.12700000   0.00243711
  0.12700000   0.00209460
  0.12700000   0.00180023
  0.12700000   0.00154723
  0.12700000   0.00132980
  0.12700000   0.00114292
  0.12700000   0.00098230
  0.12700000   0.00084426
  0.12720000   0.02401689
  0.12720000   0.02065495
  0.12720000   0.01776364
  0.12720000   0.01527707
  0.12720000   0.01313859
  0.12720000   0.01129947
  0.12720000   0.00971779
  0.12720000   0.00835752
  0.12720000   0.00718766
  0.12720000   0.00618156
  0.12720000   0.00531629
  0.12720000   0.00457215
  0.12720000   0.00393217
  0.12720000   0.00338177
  0.12720000   0.00290842
  0.12720000   0.00250133
  0.12720000   0.00215122
  0.12720000   0.00185012
  0.12720000   0.00159116
  0.12720000   0.00136846
  0.12720000   0.00117692
  0.12720000   0.00101220
  0.12720000   0.00087054
  0.12740000   0.02440558
  0.12740000   0.02100316
  0.12740000   0.01807510
  0.12740000   0.01555525
  0.12740000   0.01338671
  0.12740000   0.01152050
  0.12740000   0.00991446
  0.12740000   0.00853231
  0.12740000   0.00734286
  0.12740000   0.00631923
  0.12740000   0.00543830
  0.12740000   0.00468018
  0.12740000   0.00402775
  0.12740000   0.00346627
  0.12740000   0.00298307
  0.12740000   0.00256723
  0.12740000   0.00220936
  0.12740000   0.00190139
  0.12740000   0.00163634
  0.12740000   0.00140824
  0.12740000   0.00121195
  0.12740000   0.00104301
  0.12740000   0.00089763
  0.12760000   0.02480056
  0.12760000   0.02135724
  0.12760000   0.01839202
  0.12760000   0.01583850
  0.12760000   0.01363952
  0.12760000   0.01174585
  0.12760000   0.01011511
  0.12760000   0.00871077
  0.12760000   0.00750141
  0.12760000   0.00645996
  0.12760000   0.00556311
  0.12760000   0.00479077
  0.12760000   0.00412566
  0.12760000   0.00355289
  0.12760000   0.00305964
  0.12760000   0.00263488
  0.12760000   0.00226908
  0.12760000   0.00195407
  0.12760000   0.00168280
  0.12760000   0.00144919
  0.12760000   0.00124801
  0.12760000   0.00107476
  0.12760000   0.00092557
  0.12780000   0.02520193
  0.12780000   0.02171730
  0.12780000   0.01871450
  0.12780000   0.01612691
  0.12780000   0.01389710
  0.12780000   0.01197562
  0.12780000   0.01031982
  0.12780000   0.00889296
  0.12780000   0.00766339
  0.12780000   0.00660384
  0.12780000   0.00569078
  0.12780000   0.00490397
  0.12780000   0.00422594
  0.12780000   0.00364167
  0.12780000   0.00313818
  0.12780000   0.00270430
  0.12780000   0.00233042
  0.12780000   0.00200823
  0.12780000   0.00173058
  0.12780000   0.00149133
  0.12780000   0.00128515
  0.12780000   0.00110748
  0.12780000   0.00095438
  0.12800000   0.02560980
  0.12800000   0.02208342
  0.12800000   0.01904263
  0.12800000   0.01642057
  0.12800000   0.01415956
  0.12800000   0.01220988
  0.12800000   0.01052868
  0.12800000   0.00907897
  0.12800000   0.00782887
  0.12800000   0.00675091
  0.12800000   0.00582138
  0.12800000   0.00501984
  0.12800000   0.00432867
  0.12800000   0.00373267
  0.12800000   0.00321873
  0.12800000   0.00277556
  0.12800000   0.00239341
  0.12800000   0.00206388
  0.12800000   0.00177972
  0.12800000   0.00153469
  0.12800000   0.00132339
  0.12800000   0.00114119
  0.12800000   0.00098408
  0.12820000   0.02602428
  0.12820000   0.02245572
  0.12820000   0.01937652
  0.12820000   0.01671957
  0.12820000   0.01442696
  0.12820000   0.01244873
  0.12820000   0.01074176
  0.12820000   0.00926886
  0.12820000   0.00799793
  0.12820000   0.00690127
  0.12820000   0.00595499
  0.12820000   0.00513846
  0.12820000   0.00443390
  0.12820000   0.00382594
  0.12820000   0.00330135
  0.12820000   0.00284870
  0.12820000   0.00245811
  0.12820000   0.00212107
  0.12820000   0.00183025
  0.12820000   0.00157931
  0.12820000   0.00136278
  0.12820000   0.00117594
  0.12820000   0.00101471
  0.12840000   0.02644546
  0.12840000   0.02283430
  0.12840000   0.01971627
  0.12840000   0.01702403
  0.12840000   0.01469942
  0.12840000   0.01269225
  0.12840000   0.01095916
  0.12840000   0.00946273
  0.12840000   0.00817064
  0.12840000   0.00705498
  0.12840000   0.00609166
  0.12840000   0.00525988
  0.12840000   0.00454168
  0.12840000   0.00392155
  0.12840000   0.00338610
  0.12840000   0.00292376
  0.12840000   0.00252455
  0.12840000   0.00217985
  0.12840000   0.00188222
  0.12840000   0.00162523
  0.12840000   0.00140333
  0.12840000   0.00121173
  0.12840000   0.00104630
  0.12860000   0.02687346
  0.12860000   0.02321926
  0.12860000   0.02006198
  0.12860000   0.01733403
  0.12860000   0.01497703
  0.12860000   0.01294054
  0.12860000   0.01118097
  0.12860000   0.00966066
  0.12860000   0.00834707
  0.12860000   0.00721211
  0.12860000   0.00623147
  0.12860000   0.00538417
  0.12860000   0.00465209
  0.12860000   0.00401955
  0.12860000   0.00347302
  0.12860000   0.00300080
  0.12860000   0.00259280
  0.12860000   0.00224027
  0.12860000   0.00193567
  0.12860000   0.00167249
  0.12860000   0.00144510
  0.12860000   0.00124862
  0.12860000   0.00107887
  0.12880000   0.02730839
  0.12880000   0.02361072
  0.12880000   0.02041375
  0.12880000   0.01764968
  0.12880000   0.01525989
  0.12880000   0.01319369
  0.12880000   0.01140726
  0.12880000   0.00986272
  0.12880000   0.00852732
  0.12880000   0.00737274
  0.12880000   0.00637449
  0.12880000   0.00551140
  0.12880000   0.00476518
  0.12880000   0.00412000
  0.12880000   0.00356217
  0.12880000   0.00307988
  0.12880000   0.00266289
  0.12880000   0.00230235
  0.12880000   0.00199064
  0.12880000   0.00172113
  0.12880000   0.00148811
  0.12880000   0.00128664
  0.12880000   0.00111245
  0.12900000   0.02775037
  0.12900000   0.02400877
  0.12900000   0.02077169
  0.12900000   0.01797108
  0.12900000   0.01554808
  0.12900000   0.01345179
  0.12900000   0.01163814
  0.12900000   0.01006902
  0.12900000   0.00871147
  0.12900000   0.00753695
  0.12900000   0.00652079
  0.12900000   0.00564164
  0.12900000   0.00488103
  0.12900000   0.00422296
  0.12900000   0.00365362
  0.12900000   0.00316104
  0.12900000   0.00273487
  0.12900000   0.00236616
  0.12900000   0.00204716
  0.12900000   0.00177118
  0.12900000   0.00153240
  0.12900000   0.00132581
  0.12900000   0.00114708
  0.12920000   0.02819949
  0.12920000   0.02441354
  0.12920000   0.02113591
  0.12920000   0.01829833
  0.12920000   0.01584172
  0.12920000   0.01371494
  0.12920000   0.01187369
  0.12920000   0.01027963
  0.12920000   0.00889959
  0.12920000   0.00770482
  0.12920000   0.00667046
  0.12920000   0.00577496
  0.12920000   0.00499969
  0.12920000   0.00432849
  0.12920000   0.00374741
  0.12920000   0.00324434
  0.12920000   0.00280880
  0.12920000   0.00243174
  0.12920000   0.00210530
  0.12920000   0.00182268
  0.12920000   0.00157800
  0.12920000   0.00136618
  0.12920000   0.00118278
  0.12940000   0.02865588
  0.12940000   0.02482513
  0.12940000   0.02150651
  0.12940000   0.01863154
  0.12940000   0.01614091
  0.12940000   0.01398324
  0.12940000   0.01211401
  0.12940000   0.01049465
  0.12940000   0.00909178
  0.12940000   0.00787644
  0.12940000   0.00682356
  0.12940000   0.00591143
  0.12940000   0.00512123
  0.12940000   0.00443667
  0.12940000   0.00384361
  0.12940000   0.00332983
  0.12940000   0.00288474
  0.12940000   0.00249914
  0.12940000   0.00216508
  0.12940000   0.00187568
  0.12940000   0.00162497
  0.12940000   0.00140777
  0.12940000   0.00121961
  0.12960000   0.02911966
  0.12960000   0.02524367
  0.12960000   0.02188362
  0.12960000   0.01897083
  0.12960000   0.01644575
  0.12960000   0.01425679
  0.12960000   0.01235919
  0.12960000   0.01071417
  0.12960000   0.00928812
  0.12960000   0.00805187
  0.12960000   0.00698018
  0.12960000   0.00605113
  0.12960000   0.00524574
  0.12960000   0.00454755
  0.12960000   0.00394228
  0.12960000   0.00341758
  0.12960000   0.00296272
  0.12960000   0.00256840
  0.12960000   0.00222657
  0.12960000   0.00193023
  0.12960000   0.00167334
  0.12960000   0.00145063
  0.12960000   0.00125757
  0.12980000   0.02959095
  0.12980000   0.02566926
  0.12980000   0.02226733
  0.12980000   0.01931629
  0.12980000   0.01675635
  0.12980000   0.01453569
  0.12980000   0.01260934
  0.12980000   0.01093829
  0.12980000   0.00948870
  0.12980000   0.00823122
  0.12980000   0.00714039
  0.12980000   0.00619413
  0.12980000   0.00537327
  0.12980000   0.00466120
  0.12980000   0.00404349
  0.12980000   0.00350765
  0.12980000   0.00304282
  0.12980000   0.00263959
  0.12980000   0.00228980
  0.12980000   0.00198636
  0.12980000   0.00172314
  0.12980000   0.00149480
  0.12980000   0.00129672
  0.13000000   0.03006987
  0.13000000   0.02610202
  0.13000000   0.02265778
  0.13000000   0.01966804
  0.13000000   0.01707282
  0.13000000   0.01482006
  0.13000000   0.01286456
  0.13000000   0.01116709
  0.13000000   0.00969361
  0.13000000   0.00841456
  0.13000000   0.00730428
  0.13000000   0.00634051
  0.13000000   0.00550390
  0.13000000   0.00477769
  0.13000000   0.00414730
  0.13000000   0.00360009
  0.13000000   0.00312508
  0.13000000   0.00271275
  0.13000000   0.00235483
  0.13000000   0.00204413
  0.13000000   0.00177443
  0.13000000   0.00154032
  0.13000000   0.00133709
  0.13020000   0.03055653
  0.13020000   0.02654209
  0.13020000   0.02305508
  0.13020000   0.02002620
  0.13020000   0.01739527
  0.13020000   0.01510998
  0.13020000   0.01312494
  0.13020000   0.01140068
  0.13020000   0.00990295
  0.13020000   0.00860199
  0.13020000   0.00747194
  0.13020000   0.00649035
  0.13020000   0.00563771
  0.13020000   0.00489709
  0.13020000   0.00425377
  0.13020000   0.00369496
  0.13020000   0.00320957
  0.13020000   0.00278794
  0.13020000   0.00242170
  0.13020000   0.00210358
  0.13020000   0.00182725
  0.13020000   0.00158722
  0.13020000   0.00137872
  0.13040000   0.03105108
  0.13040000   0.02698957
  0.13040000   0.02345934
  0.13040000   0.02039089
  0.13040000   0.01772380
  0.13040000   0.01540558
  0.13040000   0.01339059
  0.13040000   0.01163916
  0.13040000   0.01011681
  0.13040000   0.00879359
  0.13040000   0.00764344
  0.13040000   0.00664373
  0.13040000   0.00577478
  0.13040000   0.00501948
  0.13040000   0.00436298
  0.13040000   0.00379234
  0.13040000   0.00329634
  0.13040000   0.00286521
  0.13040000   0.00249048
  0.13040000   0.00216475
  0.13040000   0.00188163
  0.13040000   0.00163554
  0.13040000   0.00142164
  0.13060000   0.03155362
  0.13060000   0.02744459
  0.13060000   0.02387069
  0.13060000   0.02076222
  0.13060000   0.01805855
  0.13060000   0.01570697
  0.13060000   0.01366162
  0.13060000   0.01188263
  0.13060000   0.01033530
  0.13060000   0.00898946
  0.13060000   0.00781889
  0.13060000   0.00680074
  0.13060000   0.00591518
  0.13060000   0.00514493
  0.13060000   0.00447499
  0.13060000   0.00389229
  0.13060000   0.00338546
  0.13060000   0.00294463
  0.13060000   0.00256121
  0.13060000   0.00222771
  0.13060000   0.00193764
  0.13060000   0.00168535
  0.13060000   0.00146590
  0.13080000   0.03206430
  0.13080000   0.02790729
  0.13080000   0.02428926
  0.13080000   0.02114030
  0.13080000   0.01839961
  0.13080000   0.01601425
  0.13080000   0.01393814
  0.13080000   0.01213119
  0.13080000   0.01055850
  0.13080000   0.00918970
  0.13080000   0.00799836
  0.13080000   0.00696146
  0.13080000   0.00605899
  0.13080000   0.00527352
  0.13080000   0.00458988
  0.13080000   0.00399487
  0.13080000   0.00347699
  0.13080000   0.00302625
  0.13080000   0.00263395
  0.13080000   0.00229250
  0.13080000   0.00199532
  0.13080000   0.00173667
  0.13080000   0.00151154
  0.13100000   0.03258325
  0.13100000   0.02837779
  0.13100000   0.02471516
  0.13100000   0.02152528
  0.13100000   0.01874712
  0.13100000   0.01632754
  0.13100000   0.01422026
  0.13100000   0.01238495
  0.13100000   0.01078652
  0.13100000   0.00939440
  0.13100000   0.00818195
  0.13100000   0.00712598
  0.13100000   0.00620631
  0.13100000   0.00540532
  0.13100000   0.00470772
  0.13100000   0.00410015
  0.13100000   0.00357100
  0.13100000   0.00311014
  0.13100000   0.00270876
  0.13100000   0.00235918
  0.13100000   0.00205472
  0.13100000   0.00178955
  0.13100000   0.00155860
  0.13120000   0.03311059
  0.13120000   0.02885622
  0.13120000   0.02514853
  0.13120000   0.02191727
  0.13120000   0.01910120
  0.13120000   0.01664697
  0.13120000   0.01450809
  0.13120000   0.01264403
  0.13120000   0.01101948
  0.13120000   0.00960366
  0.13120000   0.00836976
  0.13120000   0.00729440
  0.13120000   0.00635720
  0.13120000   0.00554042
  0.13120000   0.00482859
  0.13120000   0.00420821
  0.13120000   0.00366755
  0.13120000   0.00319635
  0.13120000   0.00278569
  0.13120000   0.00242779
  0.13120000   0.00211588
  0.13120000   0.00184404
  0.13120000   0.00160713
  0.13140000   0.03364646
  0.13140000   0.02934272
  0.13140000   0.02558951
  0.13140000   0.02231639
  0.13140000   0.01946196
  0.13140000   0.01697264
  0.13140000   0.01480174
  0.13140000   0.01290852
  0.13140000   0.01125746
  0.13140000   0.00981758
  0.13140000   0.00856188
  0.13140000   0.00746679
  0.13140000   0.00651177
  0.13140000   0.00567890
  0.13140000   0.00495256
  0.13140000   0.00431912
  0.13140000   0.00376671
  0.13140000   0.00328495
  0.13140000   0.00286481
  0.13140000   0.00249840
  0.13140000   0.00217887
  0.13140000   0.00190020
  0.13140000   0.00165717
  0.13160000   0.03419101
  0.13160000   0.02983742
  0.13160000   0.02603821
  0.13160000   0.02272279
  0.13160000   0.01982953
  0.13160000   0.01730469
  0.13160000   0.01510134
  0.13160000   0.01317855
  0.13160000   0.01150058
  0.13160000   0.01003627
  0.13160000   0.00875841
  0.13160000   0.00764326
  0.13160000   0.00667009
  0.13160000   0.00582084
  0.13160000   0.00507972
  0.13160000   0.00443296
  0.13160000   0.00386855
  0.13160000   0.00337600
  0.13160000   0.00294617
  0.13160000   0.00257107
  0.13160000   0.00224373
  0.13160000   0.00195806
  0.13160000   0.00170877
  0.13180000   0.03474437
  0.13180000   0.03034045
  0.13180000   0.02649478
  0.13180000   0.02313658
  0.13180000   0.02020405
  0.13180000   0.01764323
  0.13180000   0.01540701
  0.13180000   0.01345422
  0.13180000   0.01174896
  0.13180000   0.01025983
  0.13180000   0.00895946
  0.13180000   0.00782390
  0.13180000   0.00683227
  0.13180000   0.00596633
  0.13180000   0.00521014
  0.13180000   0.00454979
  0.13180000   0.00397315
  0.13180000   0.00346959
  0.13180000   0.00302985
  0.13180000   0.00264585
  0.13180000   0.00231052
  0.13180000   0.00201769
  0.13180000   0.00176198
  0.13200000   0.03530668
  0.13200000   0.03085197
  0.13200000   0.02695936
  0.13200000   0.02355791
  0.13200000   0.02058564
  0.13200000   0.01798840
  0.13200000   0.01571886
  0.13200000   0.01373567
  0.13200000   0.01200270
  0.13200000   0.01048838
  0.13200000   0.00916512
  0.13200000   0.00800881
  0.13200000   0.00699839
  0.13200000   0.00611545
  0.13200000   0.00534391
  0.13200000   0.00466971
  0.13200000   0.00408057
  0.13200000   0.00356577
  0.13200000   0.00311591
  0.13200000   0.00272281
  0.13200000   0.00237930
  0.13200000   0.00207914
  0.13200000   0.00181684
  0.13220000   0.03587809
  0.13220000   0.03137211
  0.13220000   0.02743208
  0.13220000   0.02398691
  0.13220000   0.02097444
  0.13220000   0.01834032
  0.13220000   0.01603703
  0.13220000   0.01402300
  0.13220000   0.01226192
  0.13220000   0.01072201
  0.13220000   0.00937550
  0.13220000   0.00819809
  0.13220000   0.00716855
  0.13220000   0.00626830
  0.13220000   0.00548112
  0.13220000   0.00479279
  0.13220000   0.00419091
  0.13220000   0.00366461
  0.13220000   0.00320441
  0.13220000   0.00280200
  0.13220000   0.00245013
  0.13220000   0.00214245
  0.13220000   0.00187341
  0.13240000   0.03645874
  0.13240000   0.03190101
  0.13240000   0.02791309
  0.13240000   0.02442373
  0.13240000   0.02137059
  0.13240000   0.01869913
  0.13240000   0.01636163
  0.13240000   0.01431635
  0.13240000   0.01252674
  0.13240000   0.01096085
  0.13240000   0.00959071
  0.13240000   0.00839185
  0.13240000   0.00734285
  0.13240000   0.00642498
  0.13240000   0.00562185
  0.13240000   0.00491911
  0.13240000   0.00430422
  0.13240000   0.00376620
  0.13240000   0.00329543
  0.13240000   0.00288351
  0.13240000   0.00252307
  0.13240000   0.00220770
  0.13240000   0.00193175
  0.13260000   0.03704879
  0.13260000   0.03243883
  0.13260000   0.02840253
  0.13260000   0.02486849
  0.13260000   0.02177421
  0.13260000   0.01906495
  0.13260000   0.01669281
  0.13260000   0.01461583
  0.13260000   0.01279729
  0.13260000   0.01120502
  0.13260000   0.00981087
  0.13260000   0.00859018
  0.13260000   0.00752139
  0.13260000   0.00658557
  0.13260000   0.00576620
  0.13260000   0.00504877
  0.13260000   0.00442061
  0.13260000   0.00387060
  0.13260000   0.00338903
  0.13260000   0.00296738
  0.13260000   0.00259819
  0.13260000   0.00227493
  0.13260000   0.00199190
  0.13280000   0.03764839
  0.13280000   0.03298572
  0.13280000   0.02890055
  0.13280000   0.02532136
  0.13280000   0.02218546
  0.13280000   0.01943794
  0.13280000   0.01703069
  0.13280000   0.01492158
  0.13280000   0.01307367
  0.13280000   0.01145462
  0.13280000   0.01003608
  0.13280000   0.00879321
  0.13280000   0.00770427
  0.13280000   0.00675018
  0.13280000   0.00591425
  0.13280000   0.00518184
  0.13280000   0.00454014
  0.13280000   0.00397790
  0.13280000   0.00348529
  0.13280000   0.00305369
  0.13280000   0.00267554
  0.13280000   0.00234422
  0.13280000   0.00205392
  0.13300000   0.03825768
  0.13300000   0.03354182
  0.13300000   0.02940731
  0.13300000   0.02578247
  0.13300000   0.02260447
  0.13300000   0.01981821
  0.13300000   0.01737541
  0.13300000   0.01523372
  0.13300000   0.01335603
  0.13300000   0.01170978
  0.13300000   0.01026646
  0.13300000   0.00900104
  0.13300000   0.00789160
  0.13300000   0.00691890
  0.13300000   0.00606611
  0.13300000   0.00531842
  0.13300000   0.00466290
  0.13300000   0.00408818
  0.13300000   0.00358429
  0.13300000   0.00314252
  0.13300000   0.00275519
  0.13300000   0.00241561
  0.13300000   0.00211788
  0.13320000   0.03887684
  0.13320000   0.03410729
  0.13320000   0.02992295
  0.13320000   0.02625198
  0.13320000   0.02303140
  0.13320000   0.02020593
  0.13320000   0.01772711
  0.13320000   0.01555240
  0.13320000   0.01364448
  0.13320000   0.01197063
  0.13320000   0.01050213
  0.13320000   0.00921378
  0.13320000   0.00808348
  0.13320000   0.00709185
  0.13320000   0.00622186
  0.13320000   0.00545861
  0.13320000   0.00478899
  0.13320000   0.00420151
  0.13320000   0.00368610
  0.13320000   0.00323393
  0.13320000   0.00283722
  0.13320000   0.00248918
  0.13320000   0.00218383
  0.13340000   0.03950600
  0.13340000   0.03468230
  0.13340000   0.03044762
  0.13340000   0.02673003
  0.13340000   0.02346638
  0.13340000   0.02060124
  0.13340000   0.01808593
  0.13340000   0.01587774
  0.13340000   0.01393917
  0.13340000   0.01223729
  0.13340000   0.01074321
  0.13340000   0.00943154
  0.13340000   0.00828003
  0.13340000   0.00726911
  0.13340000   0.00638162
  0.13340000   0.00560249
  0.13340000   0.00491848
  0.13340000   0.00431799
  0.13340000   0.00379081
  0.13340000   0.00332800
  0.13340000   0.00292169
  0.13340000   0.00256499
  0.13340000   0.00225184
  0.13360000   0.04014535
  0.13360000   0.03526699
  0.13360000   0.03098150
  0.13360000   0.02721679
  0.13360000   0.02390959
  0.13360000   0.02100427
  0.13360000   0.01845201
  0.13360000   0.01620988
  0.13360000   0.01424021
  0.13360000   0.01250989
  0.13360000   0.01098982
  0.13360000   0.00965446
  0.13360000   0.00848136
  0.13360000   0.00745081
  0.13360000   0.00654548
  0.13360000   0.00575016
  0.13360000   0.00505148
  0.13360000   0.00443769
  0.13360000   0.00389849
  0.13360000   0.00342480
  0.13360000   0.00300867
  0.13360000   0.00264311
  0.13360000   0.00232196
  0.13380000   0.04079503
  0.13380000   0.03586154
  0.13380000   0.03152473
  0.13380000   0.02771242
  0.13380000   0.02436116
  0.13380000   0.02141519
  0.13380000   0.01882550
  0.13380000   0.01654898
  0.13380000   0.01454777
  0.13380000   0.01278856
  0.13380000   0.01124210
  0.13380000   0.00988264
  0.13380000   0.00868759
  0.13380000   0.00763705
  0.13380000   0.00671355
  0.13380000   0.00590172
  0.13380000   0.00518807
  0.13380000   0.00456072
  0.13380000   0.00400923
  0.13380000   0.00352443
  0.13380000   0.00309825
  0.13380000   0.00272361
  0.13380000   0.00239427
  0.13400000   0.04145523
  0.13400000   0.03646611
  0.13400000   0.03207748
  0.13400000   0.02821706
  0.13400000   0.02482126
  0.13400000   0.02183415
  0.13400000   0.01920654
  0.13400000   0.01689517
  0.13400000   0.01486196
  0.13400000   0.01307344
  0.13400000   0.01150016
  0.13400000   0.01011622
  0.13400000   0.00889883
  0.13400000   0.00782795
  0.13400000   0.00688593
  0.13400000   0.00605729
  0.13400000   0.00532836
  0.13400000   0.00468715
  0.13400000   0.00412311
  0.13400000   0.00362695
  0.13400000   0.00319049
  0.13400000   0.00280656
  0.13400000   0.00246883
  0.13420000   0.04212610
  0.13420000   0.03708086
  0.13420000   0.03263992
  0.13420000   0.02873089
  0.13420000   0.02529004
  0.13420000   0.02226130
  0.13420000   0.01959530
  0.13420000   0.01724860
  0.13420000   0.01518294
  0.13420000   0.01336467
  0.13420000   0.01176416
  0.13420000   0.01035532
  0.13420000   0.00911521
  0.13420000   0.00802362
  0.13420000   0.00706275
  0.13420000   0.00621695
  0.13420000   0.00547244
  0.13420000   0.00481710
  0.13420000   0.00424024
  0.13420000   0.00373246
  0.13420000   0.00328549
  0.13420000   0.00289204
  0.13420000   0.00254572
  0.13440000   0.04280782
  0.13440000   0.03770597
  0.13440000   0.03321222
  0.13440000   0.02925407
  0.13440000   0.02576768
  0.13440000   0.02269681
  0.13440000   0.01999193
  0.13440000   0.01760942
  0.13440000   0.01551085
  0.13440000   0.01366238
  0.13440000   0.01203421
  0.13440000   0.01060008
  0.13440000   0.00933685
  0.13440000   0.00822418
  0.13440000   0.00724410
  0.13440000   0.00638082
  0.13440000   0.00562042
  0.13440000   0.00495065
  0.13440000   0.00436068
  0.13440000   0.00384103
  0.13440000   0.00338331
  0.13440000   0.00298013
  0.13440000   0.00262500
  0.13460000   0.04350057
  0.13460000   0.03834161
  0.13460000   0.03379455
  0.13460000   0.02978678
  0.13460000   0.02625434
  0.13460000   0.02314084
  0.13460000   0.02039659
  0.13460000   0.01797779
  0.13460000   0.01584584
  0.13460000   0.01396673
  0.13460000   0.01231046
  0.13460000   0.01085061
  0.13460000   0.00956389
  0.13460000   0.00842975
  0.13460000   0.00743011
  0.13460000   0.00654902
  0.13460000   0.00577241
  0.13460000   0.00508790
  0.13460000   0.00448456
  0.13460000   0.00395277
  0.13460000   0.00348404
  0.13460000   0.00307090
  0.13460000   0.00270675
  0.13480000   0.04420452
  0.13480000   0.03898797
  0.13480000   0.03438708
  0.13480000   0.03032919
  0.13480000   0.02675018
  0.13480000   0.02359355
  0.13480000   0.02080943
  0.13480000   0.01835386
  0.13480000   0.01618807
  0.13480000   0.01427786
  0.13480000   0.01259306
  0.13480000   0.01110707
  0.13480000   0.00979644
  0.13480000   0.00864047
  0.13480000   0.00762090
  0.13480000   0.00672164
  0.13480000   0.00592850
  0.13480000   0.00522895
  0.13480000   0.00461195
  0.13480000   0.00406775
  0.13480000   0.00358777
  0.13480000   0.00316443
  0.13480000   0.00279104
  0.13500000   0.04491985
  0.13500000   0.03964521
  0.13500000   0.03499000
  0.13500000   0.03088146
  0.13500000   0.02725539
  0.13500000   0.02405511
  0.13500000   0.02123063
  0.13500000   0.01873780
  0.13500000   0.01653769
  0.13500000   0.01459591
  0.13500000   0.01288214
  0.13500000   0.01136959
  0.13500000   0.01003465
  0.13500000   0.00885645
  0.13500000   0.00781659
  0.13500000   0.00689882
  0.13500000   0.00608882
  0.13500000   0.00537392
  0.13500000   0.00474296
  0.13500000   0.00418609
  0.13500000   0.00369460
  0.13500000   0.00326081
  0.13500000   0.00287797
  0.13520000   0.04564675
  0.13520000   0.04031352
  0.13520000   0.03560348
  0.13520000   0.03144379
  0.13520000   0.02777013
  0.13520000   0.02452570
  0.13520000   0.02166035
  0.13520000   0.01912977
  0.13520000   0.01689486
  0.13520000   0.01492106
  0.13520000   0.01317786
  0.13520000   0.01163832
  0.13520000   0.01027865
  0.13520000   0.00907783
  0.13520000   0.00801730
  0.13520000   0.00708067
  0.13520000   0.00625347
  0.13520000   0.00552291
  0.13520000   0.00487769
  0.13520000   0.00430786
  0.13520000   0.00380460
  0.13520000   0.00336014
  0.13520000   0.00296760
  0.13540000   0.04638540
  0.13540000   0.04099309
  0.13540000   0.03622771
  0.13540000   0.03201635
  0.13540000   0.02829459
  0.13540000   0.02500550
  0.13540000   0.02209877
  0.13540000   0.01952994
  0.13540000   0.01725974
  0.13540000   0.01525344
  0.13540000   0.01348036
  0.13540000   0.01191340
  0.13540000   0.01052858
  0.13540000   0.00930474
  0.13540000   0.00822317
  0.13540000   0.00726731
  0.13540000   0.00642257
  0.13540000   0.00567603
  0.13540000   0.00501626
  0.13540000   0.00443318
  0.13540000   0.00391788
  0.13540000   0.00346248
  0.13540000   0.00306002
  0.13560000   0.04713600
  0.13560000   0.04168411
  0.13560000   0.03686288
  0.13560000   0.03259934
  0.13560000   0.02882895
  0.13560000   0.02549468
  0.13560000   0.02254606
  0.13560000   0.01993848
  0.13560000   0.01763250
  0.13560000   0.01559323
  0.13560000   0.01378981
  0.13560000   0.01219498
  0.13560000   0.01078459
  0.13560000   0.00953733
  0.13560000   0.00843432
  0.13560000   0.00745888
  0.13560000   0.00659625
  0.13560000   0.00583339
  0.13560000   0.00515876
  0.13560000   0.00456215
  0.13560000   0.00403454
  0.13560000   0.00356795
  0.13560000   0.00315532
  0.13580000   0.04789873
  0.13580000   0.04238677
  0.13580000   0.03750918
  0.13580000   0.03319293
  0.13580000   0.02937340
  0.13580000   0.02599342
  0.13580000   0.02300239
  0.13580000   0.02035556
  0.13580000   0.01801331
  0.13580000   0.01594058
  0.13580000   0.01410636
  0.13580000   0.01248321
  0.13580000   0.01104683
  0.13580000   0.00977573
  0.13580000   0.00865090
  0.13580000   0.00765549
  0.13580000   0.00677463
  0.13580000   0.00599512
  0.13580000   0.00530530
  0.13580000   0.00469486
  0.13580000   0.00415467
  0.13580000   0.00367662
  0.13580000   0.00325359
  0.13600000   0.04867379
  0.13600000   0.04310126
  0.13600000   0.03816680
  0.13600000   0.03379732
  0.13600000   0.02992812
  0.13600000   0.02650191
  0.13600000   0.02346797
  0.13600000   0.02078136
  0.13600000   0.01840234
  0.13600000   0.01629567
  0.13600000   0.01443018
  0.13600000   0.01277825
  0.13600000   0.01131544
  0.13600000   0.01002009
  0.13600000   0.00887303
  0.13600000   0.00785729
  0.13600000   0.00695783
  0.13600000   0.00616133
  0.13600000   0.00545602
  0.13600000   0.00483144
  0.13600000   0.00427837
  0.13600000   0.00378861
  0.13600000   0.00335492
  0.13620000   0.04946138
  0.13620000   0.04382779
  0.13620000   0.03883594
  0.13620000   0.03441272
  0.13620000   0.03049332
  0.13620000   0.02702035
  0.13620000   0.02394296
  0.13620000   0.02121607
  0.13620000   0.01879977
  0.13620000   0.01665867
  0.13620000   0.01476143
  0.13620000   0.01308027
  0.13620000   0.01159059
  0.13620000   0.01027056
  0.13620000   0.00910088
  0.13620000   0.00806441
  0.13620000   0.00714598
  0.13620000   0.00633215
  0.13620000   0.00561101
  0.13620000   0.00497200
  0.13620000   0.00440576
  0.13620000   0.00390401
  0.13620000   0.00345941
  0.13640000   0.05026170
  0.13640000   0.04456655
  0.13640000   0.03951681
  0.13640000   0.03503931
  0.13640000   0.03106918
  0.13640000   0.02754893
  0.13640000   0.02442756
  0.13640000   0.02165987
  0.13640000   0.01920578
  0.13640000   0.01702975
  0.13640000   0.01510028
  0.13640000   0.01338943
  0.13640000   0.01187242
  0.13640000   0.01052729
  0.13640000   0.00933457
  0.13640000   0.00827698
  0.13640000   0.00733922
  0.13640000   0.00650771
  0.13640000   0.00577041
  0.13640000   0.00511664
  0.13640000   0.00453695
  0.13640000   0.00402293
  0.13640000   0.00356715
  0.13660000   0.05107496
  0.13660000   0.04531775
  0.13660000   0.04020960
  0.13660000   0.03567730
  0.13660000   0.03165591
  0.13660000   0.02808784
  0.13660000   0.02492196
  0.13660000   0.02211294
  0.13660000   0.01962056
  0.13660000   0.01740910
  0.13660000   0.01544691
  0.13660000   0.01370589
  0.13660000   0.01216111
  0.13660000   0.01079044
  0.13660000   0.00957426
  0.13660000   0.00849516
  0.13660000   0.00753769
  0.13660000   0.00668813
  0.13660000   0.00593433
  0.13660000   0.00526549
  0.13660000   0.00467204
  0.13660000   0.00414547
  0.13660000   0.00367825
  0.13680000   0.05190136
  0.13680000   0.04608161
  0.13680000   0.04091453
  0.13680000   0.03632689
  0.13680000   0.03225371
  0.13680000   0.02863728
  0.13680000   0.02542637
  0.13680000   0.02257549
  0.13680000   0.02004429
  0.13680000   0.01779690
  0.13680000   0.01580150
  0.13680000   0.01402983
  0.13680000   0.01245681
  0.13680000   0.01106016
  0.13680000   0.00982011
  0.13680000   0.00871909
  0.13680000   0.00774152
  0.13680000   0.00687356
  0.13680000   0.00610292
  0.13680000   0.00541867
  0.13680000   0.00481115
  0.13680000   0.00427174
  0.13680000   0.00379281
  0.13700000   0.05274111
  0.13700000   0.04685832
  0.13700000   0.04163180
  0.13700000   0.03698831
  0.13700000   0.03286280
  0.13700000   0.02919747
  0.13700000   0.02594098
  0.13700000   0.02304772
  0.13700000   0.02047717
  0.13700000   0.01819333
  0.13700000   0.01616422
  0.13700000   0.01436142
  0.13700000   0.01275970
  0.13700000   0.01133663
  0.13700000   0.01007227
  0.13700000   0.00894893
  0.13700000   0.00795087
  0.13700000   0.00706413
  0.13700000   0.00627629
  0.13700000   0.00557631
  0.13700000   0.00495441
  0.13700000   0.00440186
  0.13700000   0.00391094
  0.13720000   0.05359444
  0.13720000   0.04764811
  0.13720000   0.04236164
  0.13720000   0.03766176
  0.13720000   0.03348338
  0.13720000   0.02976860
  0.13720000   0.02646600
  0.13720000   0.02352981
  0.13720000   0.02091939
  0.13720000   0.01859859
  0.13720000   0.01653526
  0.13720000   0.01470085
  0.13720000   0.01306996
  0.13720000   0.01162000
  0.13720000   0.01033090
  0.13720000   0.00918482
  0.13720000   0.00816588
  0.13720000   0.00725998
  0.13720000   0.00645459
  0.13720000   0.00573854
  0.13720000   0.00510193
  0.13720000   0.00453595
  0.13720000   0.00403275
  0.13740000   0.05446155
  0.13740000   0.04845120
  0.13740000   0.04310425
  0.13740000   0.03834746
  0.13740000   0.03411566
  0.13740000   0.03035091
  0.13740000   0.02700163
  0.13740000   0.02402198
  0.13740000   0.02137116
  0.13740000   0.01901287
  0.13740000   0.01691482
  0.13740000   0.01504830
  0.13740000   0.01338776
  0.13740000   0.01191046
  0.13740000   0.01059618
  0.13740000   0.00942693
  0.13740000   0.00838670
  0.13740000   0.00746127
  0.13740000   0.00663795
  0.13740000   0.00590548
  0.13740000   0.00525385
  0.13740000   0.00467411
  0.13740000   0.00415835
  0.13760000   0.05534268
  0.13760000   0.04926781
  0.13760000   0.04385988
  0.13760000   0.03904563
  0.13760000   0.03475988
  0.13760000   0.03094459
  0.13760000   0.02754811
  0.13760000   0.02452445
  0.13760000   0.02183268
  0.13760000   0.01943637
  0.13760000   0.01730309
  0.13760000   0.01540396
  0.13760000   0.01371328
  0.13760000   0.01220817
  0.13760000   0.01086826
  0.13760000   0.00967542
  0.13760000   0.00861350
  0.13760000   0.00766813
  0.13760000   0.00682652
  0.13760000   0.00607729
  0.13760000   0.00541028
  0.13760000   0.00481649
  0.13760000   0.00428787
  0.13780000   0.05623804
  0.13780000   0.05009816
  0.13780000   0.04462873
  0.13780000   0.03975650
  0.13780000   0.03541625
  0.13780000   0.03154988
  0.13780000   0.02810563
  0.13780000   0.02503741
  0.13780000   0.02230416
  0.13780000   0.01986931
  0.13780000   0.01770027
  0.13780000   0.01576803
  0.13780000   0.01404672
  0.13780000   0.01251333
  0.13780000   0.01114733
  0.13780000   0.00993046
  0.13780000   0.00884642
  0.13780000   0.00788073
  0.13780000   0.00702045
  0.13780000   0.00625409
  0.13780000   0.00557138
  0.13780000   0.00496320
  0.13780000   0.00442142
  0.13800000   0.05714787
  0.13800000   0.05094249
  0.13800000   0.04541105
  0.13800000   0.04048030
  0.13800000   0.03608501
  0.13800000   0.03216700
  0.13800000   0.02867443
  0.13800000   0.02556110
  0.13800000   0.02278582
  0.13800000   0.02031189
  0.13800000   0.01810656
  0.13800000   0.01614069
  0.13800000   0.01438827
  0.13800000   0.01282611
  0.13800000   0.01143357
  0.13800000   0.01019222
  0.13800000   0.00908565
  0.13800000   0.00809922
  0.13800000   0.00721989
  0.13800000   0.00643603
  0.13800000   0.00573728
  0.13800000   0.00511439
  0.13800000   0.00455913
  0.13820000   0.05807239
  0.13820000   0.05180104
  0.13820000   0.04620706
  0.13820000   0.04121727
  0.13820000   0.03676638
  0.13820000   0.03279618
  0.13820000   0.02925474
  0.13820000   0.02609574
  0.13820000   0.02327788
  0.13820000   0.02076431
  0.13820000   0.01852218
  0.13820000   0.01652216
  0.13820000   0.01473811
  0.13820000   0.01314671
  0.13820000   0.01172715
  0.13820000   0.01046088
  0.13820000   0.00933134
  0.13820000   0.00832377
  0.13820000   0.00742499
  0.13820000   0.00662327
  0.13820000   0.00590811
  0.13820000   0.00527018
  0.13820000   0.00470113
  0.13840000   0.05901185
  0.13840000   0.05267403
  0.13840000   0.04701701
  0.13840000   0.04196764
  0.13840000   0.03746061
  0.13840000   0.03343765
  0.13840000   0.02984677
  0.13840000   0.02664155
  0.13840000   0.02378055
  0.13840000   0.02122681
  0.13840000   0.01894733
  0.13840000   0.01691264
  0.13840000   0.01509646
  0.13840000   0.01347532
  0.13840000   0.01202827
  0.13840000   0.01073662
  0.13840000   0.00958367
  0.13840000   0.00855454
  0.13840000   0.00763592
  0.13840000   0.00681595
  0.13840000   0.00608403
  0.13840000   0.00543071
  0.13840000   0.00484755
  0.13860000   0.05996648
  0.13860000   0.05356171
  0.13860000   0.04784114
  0.13860000   0.04273165
  0.13860000   0.03816793
  0.13860000   0.03409167
  0.13860000   0.03045078
  0.13860000   0.02719877
  0.13860000   0.02429408
  0.13860000   0.02169961
  0.13860000   0.01938223
  0.13860000   0.01731235
  0.13860000   0.01546352
  0.13860000   0.01381214
  0.13860000   0.01233712
  0.13860000   0.01101963
  0.13860000   0.00984283
  0.13860000   0.00879171
  0.13860000   0.00785284
  0.13860000   0.00701424
  0.13860000   0.00626519
  0.13860000   0.00559614
  0.13860000   0.00499853
  0.13880000   0.06093653
  0.13880000   0.05446433
  0.13880000   0.04867970
  0.13880000   0.04350955
  0.13880000   0.03888859
  0.13880000   0.03475846
  0.13880000   0.03106700
  0.13880000   0.02776763
  0.13880000   0.02481868
  0.13880000   0.02218293
  0.13880000   0.01982711
  0.13880000   0.01772150
  0.13880000   0.01583950
  0.13880000   0.01415738
  0.13880000   0.01265390
  0.13880000   0.01131009
  0.13880000   0.01010900
  0.13880000   0.00903546
  0.13880000   0.00807593
  0.13880000   0.00721830
  0.13880000   0.00645174
  0.13880000   0.00576660
  0.13880000   0.00515422
  0.13900000   0.06192224
  0.13900000   0.05538214
  0.13900000   0.04953293
  0.13900000   0.04430160
  0.13900000   0.03962284
  0.13900000   0.03543827
  0.13900000   0.03169569
  0.13900000   0.02834838
  0.13900000   0.02535460
  0.13900000   0.02267701
  0.13900000   0.02028220
  0.13900000   0.01814031
  0.13900000   0.01622462
  0.13900000   0.01451124
  0.13900000   0.01297881
  0.13900000   0.01160821
  0.13900000   0.01038236
  0.13900000   0.00928596
  0.13900000   0.00830534
  0.13900000   0.00742829
  0.13900000   0.00664385
  0.13900000   0.00594226
  0.13900000   0.00531475
  0.13920000   0.06292387
  0.13920000   0.05631539
  0.13920000   0.05040110
  0.13920000   0.04510804
  0.13920000   0.04037094
  0.13920000   0.03613138
  0.13920000   0.03233708
  0.13920000   0.02894127
  0.13920000   0.02590209
  0.13920000   0.02318209
  0.13920000   0.02074773
  0.13920000   0.01856901
  0.13920000   0.01661910
  0.13920000   0.01487394
  0.13920000   0.01331206
  0.13920000   0.01191419
  0.13920000   0.01066311
  0.13920000   0.00954340
  0.13920000   0.00854128
  0.13920000   0.00764439
  0.13920000   0.00684168
  0.13920000   0.00612326
  0.13920000   0.00548028
  0.13940000   0.06394168
  0.13940000   0.05726434
  0.13940000   0.05128446
  0.13940000   0.04592915
  0.13940000   0.04113315
  0.13940000   0.03683802
  0.13940000   0.03299144
  0.13940000   0.02954655
  0.13940000   0.02646139
  0.13940000   0.02369840
  0.13940000   0.02122393
  0.13940000   0.01900784
  0.13940000   0.01702316
  0.13940000   0.01524571
  0.13940000   0.01365386
  0.13940000   0.01222822
  0.13940000   0.01095145
  0.13940000   0.00980798
  0.13940000   0.00878392
  0.13940000   0.00786677
  0.13940000   0.00704540
  0.13940000   0.00630978
  0.13940000   0.00565097
  0.13960000   0.06497591
  0.13960000   0.05822925
  0.13960000   0.05218328
  0.13960000   0.04676518
  0.13960000   0.04190973
  0.13960000   0.03755846
  0.13960000   0.03365902
  0.13960000   0.03016447
  0.13960000   0.02703276
  0.13960000   0.02422621
  0.13960000   0.02171106
  0.13960000   0.01945704
  0.13960000   0.01743704
  0.13960000   0.01562676
  0.13960000   0.01400443
  0.13960000   0.01255053
  0.13960000   0.01124758
  0.13960000   0.01007990
  0.13960000   0.00903344
  0.13960000   0.00809563
  0.13960000   0.00725518
  0.13960000   0.00650198
  0.13960000   0.00582698
  0.13980000   0.06602685
  0.13980000   0.05921039
  0.13980000   0.05309782
  0.13980000   0.04761641
  0.13980000   0.04270095
  0.13980000   0.03829298
  0.13980000   0.03434010
  0.13980000   0.03079530
  0.13980000   0.02761646
  0.13980000   0.02476577
  0.13980000   0.02220936
  0.13980000   0.01991684
  0.13980000   0.01786098
  0.13980000   0.01601734
  0.13980000   0.01436401
  0.13980000   0.01288134
  0.13980000   0.01155172
  0.13980000   0.01035935
  0.13980000   0.00929006
  0.13980000   0.00833114
  0.13980000   0.00747120
  0.13980000   0.00670003
  0.13980000   0.00600846
  0.14000000   0.06709474
  0.14000000   0.06020804
  0.14000000   0.05402837
  0.14000000   0.04848311
  0.14000000   0.04350709
  0.14000000   0.03904185
  0.14000000   0.03503495
  0.14000000   0.03143932
  0.14000000   0.02821274
  0.14000000   0.02531733
  0.14000000   0.02271908
  0.14000000   0.02038751
  0.14000000   0.01829522
  0.14000000   0.01641767
  0.14000000   0.01473281
  0.14000000   0.01322086
  0.14000000   0.01186408
  0.14000000   0.01064654
  0.14000000   0.00955396
  0.14000000   0.00857350
  0.14000000   0.00769366
  0.14000000   0.00690412
  0.14000000   0.00619560
  0.14020000   0.06817987
  0.14020000   0.06122246
  0.14020000   0.05497520
  0.14020000   0.04936556
  0.14020000   0.04432842
  0.14020000   0.03980534
  0.14020000   0.03574384
  0.14020000   0.03209679
  0.14020000   0.02882189
  0.14020000   0.02588116
  0.14020000   0.02324050
  0.14020000   0.02086928
  0.14020000   0.01874001
  0.14020000   0.01682800
  0.14020000   0.01511107
  0.14020000   0.01356932
  0.14020000   0.01218488
  0.14020000   0.01094170
  0.14020000   0.00982535
  0.14020000   0.00882291
  0.14020000   0.00792274
  0.14020000   0.00711442
  0.14020000   0.00638857
  0.14040000   0.06928252
  0.14040000   0.06225394
  0.14040000   0.05593859
  0.14040000   0.05026404
  0.14040000   0.04516524
  0.14040000   0.04058375
  0.14040000   0.03646705
  0.14040000   0.03276799
  0.14040000   0.02944418
  0.14040000   0.02645754
  0.14040000   0.02377388
  0.14040000   0.02136244
  0.14040000   0.01919561
  0.14040000   0.01724858
  0.14040000   0.01549904
  0.14040000   0.01392697
  0.14040000   0.01251436
  0.14040000   0.01124503
  0.14040000   0.01010446
  0.14040000   0.00907957
  0.14040000   0.00815864
  0.14040000   0.00733113
  0.14040000   0.00658754
  0.14060000   0.07040295
  0.14060000   0.06330277
  0.14060000   0.05691884
  0.14060000   0.05117886
  0.14060000   0.04601784
  0.14060000   0.04137735
  0.14060000   0.03720488
  0.14060000   0.03345321
  0.14060000   0.03007989
  0.14060000   0.02704675
  0.14060000   0.02431948
  0.14060000   0.02186724
  0.14060000   0.01966227
  0.14060000   0.01767966
  0.14060000   0.01589697
  0.14060000   0.01429404
  0.14060000   0.01285274
  0.14060000   0.01155677
  0.14060000   0.01039148
  0.14060000   0.00934370
  0.14060000   0.00840156
  0.14060000   0.00755443
  0.14060000   0.00679271
  0.14080000   0.07154147
  0.14080000   0.06436922
  0.14080000   0.05791622
  0.14080000   0.05211029
  0.14080000   0.04688650
  0.14080000   0.04218645
  0.14080000   0.03795762
  0.14080000   0.03415274
  0.14080000   0.03072931
  0.14080000   0.02764906
  0.14080000   0.02487760
  0.14080000   0.02238395
  0.14080000   0.02014028
  0.14080000   0.01812151
  0.14080000   0.01630510
  0.14080000   0.01467077
  0.14080000   0.01320026
  0.14080000   0.01187715
  0.14080000   0.01068666
  0.14080000   0.00961551
  0.14080000   0.00865172
  0.14080000   0.00778453
  0.14080000   0.00700427
  0.14100000   0.07269835
  0.14100000   0.06545361
  0.14100000   0.05893105
  0.14100000   0.05305864
  0.14100000   0.04777153
  0.14100000   0.04301135
  0.14100000   0.03872557
  0.14100000   0.03486688
  0.14100000   0.03139273
  0.14100000   0.02826477
  0.14100000   0.02544851
  0.14100000   0.02291287
  0.14100000   0.02062989
  0.14100000   0.01857440
  0.14100000   0.01672371
  0.14100000   0.01505743
  0.14100000   0.01355718
  0.14100000   0.01220641
  0.14100000   0.01099022
  0.14100000   0.00989522
  0.14100000   0.00890932
  0.14100000   0.00802165
  0.14100000   0.00722242
  0.14120000   0.07387390
  0.14120000   0.06655622
  0.14120000   0.05996363
  0.14120000   0.05402422
  0.14120000   0.04867324
  0.14120000   0.04385235
  0.14120000   0.03950903
  0.14120000   0.03559594
  0.14120000   0.03207046
  0.14120000   0.02889418
  0.14120000   0.02603251
  0.14120000   0.02345427
  0.14120000   0.02113140
  0.14120000   0.01903859
  0.14120000   0.01715306
  0.14120000   0.01545427
  0.14120000   0.01392374
  0.14120000   0.01254478
  0.14120000   0.01130240
  0.14120000   0.01018306
  0.14120000   0.00917458
  0.14120000   0.00826598
  0.14120000   0.00744736
  0.14140000   0.07506841
  0.14140000   0.06767737
  0.14140000   0.06101426
  0.14140000   0.05500734
  0.14140000   0.04959194
  0.14140000   0.04470977
  0.14140000   0.04030832
  0.14140000   0.03634022
  0.14140000   0.03276280
  0.14140000   0.02953759
  0.14140000   0.02662989
  0.14140000   0.02400846
  0.14140000   0.02164509
  0.14140000   0.01951438
  0.14140000   0.01759342
  0.14140000   0.01586157
  0.14140000   0.01430020
  0.14140000   0.01289254
  0.14140000   0.01162344
  0.14140000   0.01047928
  0.14140000   0.00944774
  0.14140000   0.00851775
  0.14140000   0.00767930
  0.14160000   0.07628218
  0.14160000   0.06881735
  0.14160000   0.06208326
  0.14160000   0.05600831
  0.14160000   0.05052794
  0.14160000   0.04558393
  0.14160000   0.04112375
  0.14160000   0.03710004
  0.14160000   0.03347007
  0.14160000   0.03019531
  0.14160000   0.02724098
  0.14160000   0.02457572
  0.14160000   0.02217125
  0.14160000   0.02000205
  0.14160000   0.01804508
  0.14160000   0.01627959
  0.14160000   0.01468684
  0.14160000   0.01324993
  0.14160000   0.01195360
  0.14160000   0.01078410
  0.14160000   0.00972903
  0.14160000   0.00877718
  0.14160000   0.00791847
  0.14180000   0.07751552
  0.14180000   0.06997650
  0.14180000   0.06317095
  0.14180000   0.05702746
  0.14180000   0.05148159
  0.14180000   0.04647515
  0.14180000   0.04195566
  0.14180000   0.03787573
  0.14180000   0.03419259
  0.14180000   0.03086765
  0.14180000   0.02786607
  0.14180000   0.02515638
  0.14180000   0.02271019
  0.14180000   0.02050189
  0.14180000   0.01850833
  0.14180000   0.01670863
  0.14180000   0.01508393
  0.14180000   0.01361722
  0.14180000   0.01229313
  0.14180000   0.01109779
  0.14180000   0.01001869
  0.14180000   0.00904452
  0.14180000   0.00816507
  0.14200000   0.07876876
  0.14200000   0.07115511
  0.14200000   0.06427765
  0.14200000   0.05806512
  0.14200000   0.05245319
  0.14200000   0.04738376
  0.14200000   0.04280436
  0.14200000   0.03866760
  0.14200000   0.03493069
  0.14200000   0.03155495
  0.14200000   0.02850548
  0.14200000   0.02575074
  0.14200000   0.02326222
  0.14200000   0.02101421
  0.14200000   0.01898346
  0.14200000   0.01714896
  0.14200000   0.01549174
  0.14200000   0.01399468
  0.14200000   0.01264230
  0.14200000   0.01142060
  0.14200000   0.01031697
  0.14200000   0.00932000
  0.14200000   0.00841936
  0.14220000   0.08004219
  0.14220000   0.07235353
  0.14220000   0.06540369
  0.14220000   0.05912162
  0.14220000   0.05344310
  0.14220000   0.04831010
  0.14220000   0.04367021
  0.14220000   0.03947601
  0.14220000   0.03568469
  0.14220000   0.03225753
  0.14220000   0.02915955
  0.14220000   0.02635912
  0.14220000   0.02382766
  0.14220000   0.02153933
  0.14220000   0.01947077
  0.14220000   0.01760088
  0.14220000   0.01591058
  0.14220000   0.01438260
  0.14220000   0.01300138
  0.14220000   0.01175280
  0.14220000   0.01062413
  0.14220000   0.00960386
  0.14220000   0.00868157
  0.14240000   0.08133616
  0.14240000   0.07357208
  0.14240000   0.06654941
  0.14240000   0.06019729
  0.14240000   0.05445164
  0.14240000   0.04925452
  0.14240000   0.04455353
  0.14240000   0.04030129
  0.14240000   0.03645494
  0.14240000   0.03297574
  0.14240000   0.02982861
  0.14240000   0.02698187
  0.14240000   0.02440682
  0.14240000   0.02207755
  0.14240000   0.01997058
  0.14240000   0.01806471
  0.14240000   0.01634072
  0.14240000   0.01478127
  0.14240000   0.01337065
  0.14240000   0.01209465
  0.14240000   0.01094043
  0.14240000   0.00989636
  0.14240000   0.00895193
  0.14260000   0.08265098
  0.14260000   0.07481109
  0.14260000   0.06771515
  0.14260000   0.06129249
  0.14260000   0.05547918
  0.14260000   0.05021737
  0.14260000   0.04545470
  0.14260000   0.04114380
  0.14260000   0.03724180
  0.14260000   0.03370991
  0.14260000   0.03051300
  0.14260000   0.02761930
  0.14260000   0.02500005
  0.14260000   0.02262921
  0.14260000   0.02048322
  0.14260000   0.01854074
  0.14260000   0.01678249
  0.14260000   0.01519098
  0.14260000   0.01375040
  0.14260000   0.01244644
  0.14260000   0.01126614
  0.14260000   0.01019777
  0.14260000   0.00923071
  0.14280000   0.08398699
  0.14280000   0.07607091
  0.14280000   0.06890126
  0.14280000   0.06240757
  0.14280000   0.05652607
  0.14280000   0.05119899
  0.14280000   0.04637405
  0.14280000   0.04200388
  0.14280000   0.03804561
  0.14280000   0.03446040
  0.14280000   0.03121307
  0.14280000   0.02827178
  0.14280000   0.02560768
  0.14280000   0.02319464
  0.14280000   0.02100899
  0.14280000   0.01902931
  0.14280000   0.01723619
  0.14280000   0.01561204
  0.14280000   0.01414093
  0.14280000   0.01280845
  0.14280000   0.01160154
  0.14280000   0.01050835
  0.14280000   0.00951817
  0.14300000   0.08534453
  0.14300000   0.07735189
  0.14300000   0.07010809
  0.14300000   0.06354289
  0.14300000   0.05759267
  0.14300000   0.05219977
  0.14300000   0.04731196
  0.14300000   0.04288192
  0.14300000   0.03886674
  0.14300000   0.03522757
  0.14300000   0.03192918
  0.14300000   0.02893965
  0.14300000   0.02623006
  0.14300000   0.02377418
  0.14300000   0.02154825
  0.14300000   0.01953075
  0.14300000   0.01770214
  0.14300000   0.01604475
  0.14300000   0.01454255
  0.14300000   0.01318099
  0.14300000   0.01194691
  0.14300000   0.01082838
  0.14300000   0.00981458
  0.14320000   0.08672394
  0.14320000   0.07865437
  0.14320000   0.07133599
  0.14320000   0.06469880
  0.14320000   0.05867934
  0.14320000   0.05322006
  0.14320000   0.04826881
  0.14320000   0.04377827
  0.14320000   0.03970557
  0.14320000   0.03601180
  0.14320000   0.03266170
  0.14320000   0.02962328
  0.14320000   0.02686754
  0.14320000   0.02436818
  0.14320000   0.02210134
  0.14320000   0.02004538
  0.14320000   0.01818068
  0.14320000   0.01648946
  0.14320000   0.01495556
  0.14320000   0.01356435
  0.14320000   0.01230257
  0.14320000   0.01115816
  0.14320000   0.01012021
  0.14340000   0.08812557
  0.14340000   0.07997871
  0.14340000   0.07258534
  0.14340000   0.06587569
  0.14340000   0.05978647
  0.14340000   0.05426026
  0.14340000   0.04924496
  0.14340000   0.04469333
  0.14340000   0.04056246
  0.14340000   0.03681345
  0.14340000   0.03341099
  0.14340000   0.03032303
  0.14340000   0.02752050
  0.14340000   0.02497701
  0.14340000   0.02266860
  0.14340000   0.02057356
  0.14340000   0.01867215
  0.14340000   0.01694647
  0.14340000   0.01538029
  0.14340000   0.01395886
  0.14340000   0.01266880
  0.14340000   0.01149797
  0.14340000   0.01043535
  0.14360000   0.08954978
  0.14360000   0.08132529
  0.14360000   0.07385651
  0.14360000   0.06707393
  0.14360000   0.06091443
  0.14360000   0.05532073
  0.14360000   0.05024082
  0.14360000   0.04562747
  0.14360000   0.04143781
  0.14360000   0.03763292
  0.14360000   0.03417745
  0.14360000   0.03103929
  0.14360000   0.02818931
  0.14360000   0.02560103
  0.14360000   0.02325041
  0.14360000   0.02111564
  0.14360000   0.01917688
  0.14360000   0.01741614
  0.14360000   0.01581707
  0.14360000   0.01436483
  0.14360000   0.01304593
  0.14360000   0.01184812
  0.14360000   0.01076030
  0.14380000   0.09099692
  0.14380000   0.08269446
  0.14380000   0.07514988
  0.14380000   0.06829390
  0.14380000   0.06206362
  0.14380000   0.05640188
  0.14380000   0.05125677
  0.14380000   0.04658110
  0.14380000   0.04233202
  0.14380000   0.03847060
  0.14380000   0.03496146
  0.14380000   0.03177244
  0.14380000   0.02887434
  0.14380000   0.02624061
  0.14380000   0.02384713
  0.14380000   0.02167198
  0.14380000   0.01969524
  0.14380000   0.01789882
  0.14380000   0.01626625
  0.14380000   0.01478260
  0.14380000   0.01343427
  0.14380000   0.01220893
  0.14380000   0.01109536
  0.14400000   0.09246737
  0.14400000   0.08408660
  0.14400000   0.07646582
  0.14400000   0.06953600
  0.14400000   0.06323443
  0.14400000   0.05750411
  0.14400000   0.05229321
  0.14400000   0.04755461
  0.14400000   0.04324549
  0.14400000   0.03932689
  0.14400000   0.03576343
  0.14400000   0.03252289
  0.14400000   0.02957600
  0.14400000   0.02689616
  0.14400000   0.02445915
  0.14400000   0.02224297
  0.14400000   0.02022760
  0.14400000   0.01839485
  0.14400000   0.01672817
  0.14400000   0.01521250
  0.14400000   0.01383417
  0.14400000   0.01258072
  0.14400000   0.01144085
  0.14420000   0.09396149
  0.14420000   0.08550210
  0.14420000   0.07780473
  0.14420000   0.07080062
  0.14420000   0.06442727
  0.14420000   0.05862783
  0.14420000   0.05335056
  0.14420000   0.04854843
  0.14420000   0.04417862
  0.14420000   0.04020221
  0.14420000   0.03658375
  0.14420000   0.03329102
  0.14420000   0.03029469
  0.14420000   0.02756806
  0.14420000   0.02508685
  0.14420000   0.02282898
  0.14420000   0.02077434
  0.14420000   0.01890462
  0.14420000   0.01720319
  0.14420000   0.01565490
  0.14420000   0.01424596
  0.14420000   0.01296383
  0.14420000   0.01179709
  0.14440000   0.09547966
  0.14440000   0.08694135
  0.14440000   0.07916700
  0.14440000   0.07208817
  0.14440000   0.06564255
  0.14440000   0.05977344
  0.14440000   0.05442924
  0.14440000   0.04956297
  0.14440000   0.04513185
  0.14440000   0.04109697
  0.14440000   0.03742286
  0.14440000   0.03407727
  0.14440000   0.03103080
  0.14440000   0.02825672
  0.14440000   0.02573064
  0.14440000   0.02343041
  0.14440000   0.02133583
  0.14440000   0.01942850
  0.14440000   0.01769169
  0.14440000   0.01611015
  0.14440000   0.01466999
  0.14440000   0.01335858
  0.14440000   0.01216441
  0.14460000   0.09702226
  0.14460000   0.08840473
  0.14460000   0.08055305
  0.14460000   0.07339906
  0.14460000   0.06688068
  0.14460000   0.06094138
  0.14460000   0.05552967
  0.14460000   0.05059865
  0.14460000   0.04610560
  0.14460000   0.04201160
  0.14460000   0.03828118
  0.14460000   0.03488205
  0.14460000   0.03178478
  0.14460000   0.02896255
  0.14460000   0.02639093
  0.14460000   0.02404767
  0.14460000   0.02191248
  0.14460000   0.01996688
  0.14460000   0.01819405
  0.14460000   0.01657862
  0.14460000   0.01510664
  0.14460000   0.01376535
  0.14460000   0.01254316
  0.14480000   0.09858968
  0.14480000   0.08989265
  0.14480000   0.08196329
  0.14480000   0.07473371
  0.14480000   0.06814209
  0.14480000   0.06213208
  0.14480000   0.05665230
  0.14480000   0.05165593
  0.14480000   0.04710032
  0.14480000   0.04294654
  0.14480000   0.03915915
  0.14480000   0.03570581
  0.14480000   0.03255704
  0.14480000   0.02968599
  0.14480000   0.02706814
  0.14480000   0.02468116
  0.14480000   0.02250470
  0.14480000   0.02052017
  0.14480000   0.01871065
  0.14480000   0.01706071
  0.14480000   0.01555627
  0.14480000   0.01418449
  0.14480000   0.01293369
  0.14500000   0.10018232
  0.14500000   0.09140552
  0.14500000   0.08339812
  0.14500000   0.07609255
  0.14500000   0.06942723
  0.14500000   0.06334597
  0.14500000   0.05779755
  0.14500000   0.05273525
  0.14500000   0.04811644
  0.14500000   0.04390225
  0.14500000   0.04005721
  0.14500000   0.03654898
  0.14500000   0.03334804
  0.14500000   0.03042747
  0.14500000   0.02776270
  0.14500000   0.02533132
  0.14500000   0.02311289
  0.14500000   0.02108876
  0.14500000   0.01924190
  0.14500000   0.01755679
  0.14500000   0.01601926
  0.14500000   0.01461639
  0.14500000   0.01333637
  0.14520000   0.10180058
  0.14520000   0.09294375
  0.14520000   0.08485797
  0.14520000   0.07747601
  0.14520000   0.07073652
  0.14520000   0.06458351
  0.14520000   0.05896590
  0.14520000   0.05383706
  0.14520000   0.04915443
  0.14520000   0.04487917
  0.14520000   0.04097582
  0.14520000   0.03741202
  0.14520000   0.03415821
  0.14520000   0.03118743
  0.14520000   0.02847505
  0.14520000   0.02599858
  0.14520000   0.02373751
  0.14520000   0.02167309
  0.14520000   0.01978822
  0.14520000   0.01806729
  0.14520000   0.01649603
  0.14520000   0.01506142
  0.14520000   0.01375158
  0.14540000   0.10344487
  0.14540000   0.09450776
  0.14540000   0.08634329
  0.14540000   0.07888454
  0.14540000   0.07207042
  0.14540000   0.06584515
  0.14540000   0.06015779
  0.14540000   0.05496182
  0.14540000   0.05021476
  0.14540000   0.04587778
  0.14540000   0.04191546
  0.14540000   0.03829540
  0.14540000   0.03498804
  0.14540000   0.03196634
  0.14540000   0.02920564
  0.14540000   0.02668339
  0.14540000   0.02437897
  0.14540000   0.02227359
  0.14540000   0.02035003
  0.14540000   0.01859261
  0.14540000   0.01698696
  0.14540000   0.01551998
  0.14540000   0.01417970
  0.14560000   0.10511560
  0.14560000   0.09609798
  0.14560000   0.08785450
  0.14560000   0.08031858
  0.14560000   0.07342939
  0.14560000   0.06713136
  0.14560000   0.06137371
  0.14560000   0.05611002
  0.14560000   0.05129790
  0.14560000   0.04689856
  0.14560000   0.04287659
  0.14560000   0.03919960
  0.14560000   0.03583798
  0.14560000   0.03276468
  0.14560000   0.02995495
  0.14560000   0.02738620
  0.14560000   0.02503775
  0.14560000   0.02289070
  0.14560000   0.02092777
  0.14560000   0.01913318
  0.14560000   0.01749249
  0.14560000   0.01599249
  0.14560000   0.01462113
  0.14580000   0.10681318
  0.14580000   0.09771484
  0.14580000   0.08939206
  0.14580000   0.08177859
  0.14580000   0.07481389
  0.14580000   0.06844261
  0.14580000   0.06261412
  0.14580000   0.05728214
  0.14580000   0.05240434
  0.14580000   0.04794200
  0.14580000   0.04385971
  0.14580000   0.04012509
  0.14580000   0.03670852
  0.14580000   0.03358291
  0.14580000   0.03072346
  0.14580000   0.02810750
  0.14580000   0.02571430
  0.14580000   0.02352488
  0.14580000   0.02152189
  0.14580000   0.01968946
  0.14580000   0.01801304
  0.14580000   0.01647937
  0.14580000   0.01507629
  0.14600000   0.10853806
  0.14600000   0.09935879
  0.14600000   0.09095641
  0.14600000   0.08326504
  0.14600000   0.07622441
  0.14600000   0.06977939
  0.14600000   0.06387953
  0.14600000   0.05847867
  0.14600000   0.05353458
  0.14600000   0.04900858
  0.14600000   0.04486532
  0.14600000   0.04107239
  0.14600000   0.03760017
  0.14600000   0.03442153
  0.14600000   0.03151163
  0.14600000   0.02884776
  0.14600000   0.02640910
  0.14600000   0.02417661
  0.14600000   0.02213285
  0.14600000   0.02026188
  0.14600000   0.01854907
  0.14600000   0.01698106
  0.14600000   0.01554560
  0.14620000   0.11029065
  0.14620000   0.10103027
  0.14620000   0.09254802
  0.14620000   0.08477840
  0.14620000   0.07766142
  0.14620000   0.07114219
  0.14620000   0.06517043
  0.14620000   0.05970012
  0.14620000   0.05468913
  0.14620000   0.05009884
  0.14620000   0.04589392
  0.14620000   0.04204200
  0.14620000   0.03851343
  0.14620000   0.03528105
  0.14620000   0.03232000
  0.14620000   0.02960748
  0.14620000   0.02712264
  0.14620000   0.02484636
  0.14620000   0.02276113
  0.14620000   0.02085092
  0.14620000   0.01910103
  0.14620000   0.01749800
  0.14620000   0.01602951
  0.14640000   0.11207140
  0.14640000   0.10272973
  0.14640000   0.09416737
  0.14640000   0.08631915
  0.14640000   0.07912542
  0.14640000   0.07253150
  0.14640000   0.06648733
  0.14640000   0.06094701
  0.14640000   0.05586850
  0.14640000   0.05121328
  0.14640000   0.04694605
  0.14640000   0.04303445
  0.14640000   0.03944882
  0.14640000   0.03616199
  0.14640000   0.03314905
  0.14640000   0.03038717
  0.14640000   0.02785543
  0.14640000   0.02553464
  0.14640000   0.02340722
  0.14640000   0.02145706
  0.14640000   0.01966938
  0.14640000   0.01803066
  0.14640000   0.01652846
  0.14660000   0.11388076
  0.14660000   0.10445765
  0.14660000   0.09581492
  0.14660000   0.08788779
  0.14660000   0.08061691
  0.14660000   0.07394785
  0.14660000   0.06783074
  0.14660000   0.06221985
  0.14660000   0.05707323
  0.14660000   0.05235245
  0.14660000   0.04802223
  0.14660000   0.04405026
  0.14660000   0.04040687
  0.14660000   0.03706488
  0.14660000   0.03399933
  0.14660000   0.03118736
  0.14660000   0.02860798
  0.14660000   0.02624195
  0.14660000   0.02407161
  0.14660000   0.02208079
  0.14660000   0.02025463
  0.14660000   0.01857950
  0.14660000   0.01704292
  0.14680000   0.11571917
  0.14680000   0.10621449
  0.14680000   0.09749116
  0.14680000   0.08948481
  0.14680000   0.08213640
  0.14680000   0.07539175
  0.14680000   0.06920121
  0.14680000   0.06351918
  0.14680000   0.05830386
  0.14680000   0.05351687
  0.14680000   0.04912302
  0.14680000   0.04508999
  0.14680000   0.04138814
  0.14680000   0.03799025
  0.14680000   0.03487137
  0.14680000   0.03200857
  0.14680000   0.02938082
  0.14680000   0.02696881
  0.14680000   0.02475484
  0.14680000   0.02272263
  0.14680000   0.02085726
  0.14680000   0.01914503
  0.14680000   0.01757338
  0.14700000   0.11758711
  0.14700000   0.10800073
  0.14700000   0.09919659
  0.14700000   0.09111073
  0.14700000   0.08368441
  0.14700000   0.07686374
  0.14700000   0.07059926
  0.14700000   0.06484556
  0.14700000   0.05956094
  0.14700000   0.05470712
  0.14700000   0.05024897
  0.14700000   0.04615419
  0.14700000   0.04239317
  0.14700000   0.03893868
  0.14700000   0.03576573
  0.14700000   0.03285136
  0.14700000   0.03017449
  0.14700000   0.02771577
  0.14700000   0.02545742
  0.14700000   0.02338309
  0.14700000   0.02147779
  0.14700000   0.01972775
  0.14700000   0.01812032
  0.14720000   0.11948503
  0.14720000   0.10981685
  0.14720000   0.10093172
  0.14720000   0.09276605
  0.14720000   0.08526147
  0.14720000   0.07836435
  0.14720000   0.07202545
  0.14720000   0.06619953
  0.14720000   0.06084503
  0.14720000   0.05592376
  0.14720000   0.05140064
  0.14720000   0.04724345
  0.14720000   0.04342255
  0.14720000   0.03991073
  0.14720000   0.03668297
  0.14720000   0.03371629
  0.14720000   0.03098957
  0.14720000   0.02848338
  0.14720000   0.02617990
  0.14720000   0.02406271
  0.14720000   0.02211676
  0.14720000   0.02032818
  0.14720000   0.01868426
  0.14740000   0.12141341
  0.14740000   0.11166335
  0.14740000   0.10269704
  0.14740000   0.09445131
  0.14740000   0.08686812
  0.14740000   0.07989414
  0.14740000   0.07348034
  0.14740000   0.06758167
  0.14740000   0.06215671
  0.14740000   0.05716737
  0.14740000   0.05257864
  0.14740000   0.04835833
  0.14740000   0.04447685
  0.14740000   0.04090698
  0.14740000   0.03762368
  0.14740000   0.03460395
  0.14740000   0.03182661
  0.14740000   0.02927221
  0.14740000   0.02692285
  0.14740000   0.02476206
  0.14740000   0.02277470
  0.14740000   0.02094686
  0.14740000   0.01926572
  0.14760000   0.12337273
  0.14760000   0.11354073
  0.14760000   0.10449307
  0.14760000   0.09616703
  0.14760000   0.08850491
  0.14760000   0.08145366
  0.14760000   0.07496450
  0.14760000   0.06899256
  0.14760000   0.06349657
  0.14760000   0.05843854
  0.14760000   0.05378355
  0.14760000   0.04949945
  0.14760000   0.04555668
  0.14760000   0.04192803
  0.14760000   0.03858845
  0.14760000   0.03551492
  0.14760000   0.03268621
  0.14760000   0.03008284
  0.14760000   0.02768684
  0.14760000   0.02548169
  0.14760000   0.02345218
  0.14760000   0.02158433
  0.14760000   0.01986525
  0.14780000   0.12536349
  0.14780000   0.11544949
  0.14780000   0.10632036
  0.14780000   0.09791377
  0.14780000   0.09017239
  0.14780000   0.08304349
  0.14780000   0.07647852
  0.14780000   0.07043280
  0.14780000   0.06486520
  0.14780000   0.05973788
  0.14780000   0.05501598
  0.14780000   0.05066742
  0.14780000   0.04666266
  0.14780000   0.04297450
  0.14780000   0.03957791
  0.14780000   0.03644981
  0.14780000   0.03356898
  0.14780000   0.03091587
  0.14780000   0.02847247
  0.14780000   0.02622219
  0.14780000   0.02414978
  0.14780000   0.02224117
  0.14780000   0.02048341
  0.14800000   0.12738617
  0.14800000   0.11739016
  0.14800000   0.10817942
  0.14800000   0.09969207
  0.14800000   0.09187115
  0.14800000   0.08466422
  0.14800000   0.07802298
  0.14800000   0.07190297
  0.14800000   0.06626322
  0.14800000   0.06106600
  0.14800000   0.05627655
  0.14800000   0.05186285
  0.14800000   0.04779540
  0.14800000   0.04404702
  0.14800000   0.04059266
  0.14800000   0.03740925
  0.14800000   0.03447553
  0.14800000   0.03177191
  0.14800000   0.02928034
  0.14800000   0.02698417
  0.14800000   0.02486809
  0.14800000   0.02291796
  0.14800000   0.02112077
  0.14820000   0.12944128
  0.14820000   0.11936327
  0.14820000   0.11007081
  0.14820000   0.10150250
  0.14820000   0.09360175
  0.14820000   0.08631643
  0.14820000   0.07959850
  0.14820000   0.07340371
  0.14820000   0.06769126
  0.14820000   0.06242355
  0.14820000   0.05756592
  0.14820000   0.05308640
  0.14820000   0.04895556
  0.14820000   0.04514622
  0.14820000   0.04163336
  0.14820000   0.03839388
  0.14820000   0.03540651
  0.14820000   0.03265161
  0.14820000   0.03011108
  0.14820000   0.02776825
  0.14820000   0.02560772
  0.14820000   0.02361531
  0.14820000   0.02177792
  0.14840000   0.13152934
  0.14840000   0.12136933
  0.14840000   0.11199509
  0.14840000   0.10334564
  0.14840000   0.09536478
  0.14840000   0.08800072
  0.14840000   0.08120569
  0.14840000   0.07493564
  0.14840000   0.06914996
  0.14840000   0.06381117
  0.14840000   0.05888471
  0.14840000   0.05433872
  0.14840000   0.05014379
  0.14840000   0.04627278
  0.14840000   0.04270067
  0.14840000   0.03940436
  0.14840000   0.03636256
  0.14840000   0.03355560
  0.14840000   0.03096534
  0.14840000   0.02857506
  0.14840000   0.02636931
  0.14840000   0.02433383
  0.14840000   0.02245549
  0.14860000   0.13365085
  0.14860000   0.12340890
  0.14860000   0.11395280
  0.14860000   0.10522205
  0.14860000   0.09716085
  0.14860000   0.08971773
  0.14860000   0.08284519
  0.14860000   0.07649941
  0.14860000   0.07063995
  0.14860000   0.06522951
  0.14860000   0.06023361
  0.14860000   0.05562048
  0.14860000   0.05136076
  0.14860000   0.04742736
  0.14860000   0.04379526
  0.14860000   0.04044136
  0.14860000   0.03734436
  0.14860000   0.03448456
  0.14860000   0.03184379
  0.14860000   0.02940526
  0.14860000   0.02715350
  0.14860000   0.02507418
  0.14860000   0.02315410
  0.14880000   0.13580636
  0.14880000   0.12548253
  0.14880000   0.11594454
  0.14880000   0.10713235
  0.14880000   0.09899057
  0.14880000   0.09146806
  0.14880000   0.08451762
  0.14880000   0.07809566
  0.14880000   0.07216192
  0.14880000   0.06667925
  0.14880000   0.06161330
  0.14880000   0.05693237
  0.14880000   0.05260718
  0.14880000   0.04861066
  0.14880000   0.04491782
  0.14880000   0.04150558
  0.14880000   0.03835259
  0.14880000   0.03543917
  0.14880000   0.03274709
  0.14880000   0.03025953
  0.14880000   0.02796095
  0.14880000   0.02583700
  0.14880000   0.02387440
  0.14900000   0.13799639
  0.14900000   0.12759078
  0.14900000   0.11797087
  0.14900000   0.10907713
  0.14900000   0.10085456
  0.14900000   0.09325237
  0.14900000   0.08622365
  0.14900000   0.07972506
  0.14900000   0.07371654
  0.14900000   0.06816107
  0.14900000   0.06302446
  0.14900000   0.05827509
  0.14900000   0.05388373
  0.14900000   0.04982338
  0.14900000   0.04606907
  0.14900000   0.04259771
  0.14900000   0.03938797
  0.14900000   0.03642013
  0.14900000   0.03367594
  0.14900000   0.03113855
  0.14900000   0.02879237
  0.14900000   0.02662298
  0.14900000   0.02461706
  0.14920000   0.14022148
  0.14920000   0.12973420
  0.14920000   0.12003239
  0.14920000   0.11105699
  0.14920000   0.10275344
  0.14920000   0.09507130
  0.14920000   0.08796395
  0.14920000   0.08138830
  0.14920000   0.07530450
  0.14920000   0.06967569
  0.14920000   0.06446782
  0.14920000   0.05964935
  0.14920000   0.05519115
  0.14920000   0.05106625
  0.14920000   0.04724972
  0.14920000   0.04371849
  0.14920000   0.04045123
  0.14920000   0.03742818
  0.14920000   0.03463108
  0.14920000   0.03204305
  0.14920000   0.02964845
  0.14920000   0.02743281
  0.14920000   0.02538277
  0.14940000   0.14248219
  0.14940000   0.13191339
  0.14940000   0.12212971
  0.14940000   0.11307258
  0.14940000   0.10468787
  0.14940000   0.09692552
  0.14940000   0.08973919
  0.14940000   0.08308607
  0.14940000   0.07692650
  0.14940000   0.07122382
  0.14940000   0.06594409
  0.14940000   0.06105589
  0.14940000   0.05653017
  0.14940000   0.05234002
  0.14940000   0.04846054
  0.14940000   0.04486868
  0.14940000   0.04154309
  0.14940000   0.03846404
  0.14940000   0.03561324
  0.14940000   0.03297375
  0.14940000   0.03052992
  0.14940000   0.02826723
  0.14940000   0.02617225
  0.14960000   0.14477908
  0.14960000   0.13412893
  0.14960000   0.12426342
  0.14960000   0.11512452
  0.14960000   0.10665851
  0.14960000   0.09881569
  0.14960000   0.09155007
  0.14960000   0.08481908
  0.14960000   0.07858328
  0.14960000   0.07280619
  0.14960000   0.06745402
  0.14960000   0.06249547
  0.14960000   0.05790156
  0.14960000   0.05364545
  0.14960000   0.04970228
  0.14960000   0.04604902
  0.14960000   0.04266434
  0.14960000   0.03952849
  0.14960000   0.03662317
  0.14960000   0.03393141
  0.14960000   0.03143753
  0.14960000   0.02912696
  0.14960000   0.02698623
  0.14980000   0.14711271
  0.14980000   0.13638140
  0.14980000   0.12643416
  0.14980000   0.11721345
  0.14980000   0.10866601
  0.14980000   0.10074251
  0.14980000   0.09339729
  0.14980000   0.08658804
  0.14980000   0.08027557
  0.14980000   0.07442356
  0.14980000   0.06899838
  0.14980000   0.06396885
  0.14980000   0.05930609
  0.14980000   0.05498331
  0.14980000   0.05097572
  0.14980000   0.04726030
  0.14980000   0.04381575
  0.14980000   0.04062231
  0.14980000   0.03766166
  0.14980000   0.03491682
  0.14980000   0.03237205
  0.14980000   0.03001277
  0.14980000   0.02782546
  0.15000000   0.14948367
  0.15000000   0.13867143
  0.15000000   0.12864255
  0.15000000   0.11934003
  0.15000000   0.11071106
  0.15000000   0.10270669
  0.15000000   0.09528158
  0.15000000   0.08839370
  0.15000000   0.08200411
  0.15000000   0.07607668
  0.15000000   0.07057793
  0.15000000   0.06547682
  0.15000000   0.06074454
  0.15000000   0.05635441
  0.15000000   0.05228167
  0.15000000   0.04850334
  0.15000000   0.04499814
  0.15000000   0.04174630
  0.15000000   0.03872950
  0.15000000   0.03593075
  0.15000000   0.03333428
  0.15000000   0.03092546
  0.15000000   0.02869073
  0.15020000   0.15189252
  0.15020000   0.14099961
  0.15020000   0.13088924
  0.15020000   0.12150494
  0.15020000   0.11279434
  0.15020000   0.10470892
  0.15020000   0.09720366
  0.15020000   0.09023682
  0.15020000   0.08376968
  0.15020000   0.07776634
  0.15020000   0.07219348
  0.15020000   0.06702017
  0.15020000   0.06221774
  0.15020000   0.05775957
  0.15020000   0.05362095
  0.15020000   0.04977896
  0.15020000   0.04621232
  0.15020000   0.04290129
  0.15020000   0.03982753
  0.15020000   0.03697404
  0.15020000   0.03432503
  0.15020000   0.03186582
  0.15020000   0.02958283
  0.15040000   0.15433988
  0.15040000   0.14336658
  0.15040000   0.13317488
  0.15040000   0.12370884
  0.15040000   0.11491657
  0.15040000   0.10674994
  0.15040000   0.09916428
  0.15040000   0.09211814
  0.15040000   0.08557306
  0.15040000   0.07949334
  0.15040000   0.07384582
  0.15040000   0.06859974
  0.15040000   0.06372651
  0.15040000   0.05919961
  0.15040000   0.05499440
  0.15040000   0.05108800
  0.15040000   0.04745915
  0.15040000   0.04408813
  0.15040000   0.04095660
  0.15040000   0.03804754
  0.15040000   0.03534514
  0.15040000   0.03283470
  0.15040000   0.03050260
  0.15060000   0.15682633
  0.15060000   0.14577296
  0.15060000   0.13550013
  0.15060000   0.12595243
  0.15060000   0.11707846
  0.15060000   0.10883049
  0.15060000   0.10116420
  0.15060000   0.09403846
  0.15060000   0.08741505
  0.15060000   0.08125849
  0.15060000   0.07553580
  0.15060000   0.07021636
  0.15060000   0.06527171
  0.15060000   0.06067541
  0.15060000   0.05640289
  0.15060000   0.05243133
  0.15060000   0.04873950
  0.15060000   0.04530768
  0.15060000   0.04211756
  0.15060000   0.03915210
  0.15060000   0.03639547
  0.15060000   0.03383296
  0.15060000   0.03145089
  0.15080000   0.15935250
  0.15080000   0.14821940
  0.15080000   0.13786566
  0.15080000   0.12823641
  0.15080000   0.11928073
  0.15080000   0.11095132
  0.15080000   0.10320421
  0.15080000   0.09599857
  0.15080000   0.08929647
  0.15080000   0.08306263
  0.15080000   0.07726426
  0.15080000   0.07187090
  0.15080000   0.06685420
  0.15080000   0.06218784
  0.15080000   0.05784731
  0.15080000   0.05380984
  0.15080000   0.05005425
  0.15080000   0.04656085
  0.15080000   0.04331132
  0.15080000   0.04028862
  0.15080000   0.03747692
  0.15080000   0.03486147
  0.15080000   0.03242858
  0.15100000   0.16191900
  0.15100000   0.15070656
  0.15100000   0.14027215
  0.15100000   0.13056149
  0.15100000   0.12152413
  0.15100000   0.11311319
  0.15100000   0.10528508
  0.15100000   0.09799929
  0.15100000   0.09121814
  0.15100000   0.08490659
  0.15100000   0.07903206
  0.15100000   0.07356422
  0.15100000   0.06847488
  0.15100000   0.06373779
  0.15100000   0.05932855
  0.15100000   0.05522445
  0.15100000   0.05140434
  0.15100000   0.04784855
  0.15100000   0.04453880
  0.15100000   0.04145803
  0.15100000   0.03859040
  0.15100000   0.03592116
  0.15100000   0.03343657
  0.15120000   0.16452645
  0.15120000   0.15323508
  0.15120000   0.14272031
  0.15120000   0.13292841
  0.15120000   0.12380942
  0.15120000   0.11531690
  0.15120000   0.10740764
  0.15120000   0.10004144
  0.15120000   0.09318092
  0.15120000   0.08679126
  0.15120000   0.08084009
  0.15120000   0.07529723
  0.15120000   0.07013465
  0.15120000   0.06532620
  0.15120000   0.06084756
  0.15120000   0.05667609
  0.15120000   0.05279069
  0.15120000   0.04917173
  0.15120000   0.04580093
  0.15120000   0.04266126
  0.15120000   0.03973685
  0.15120000   0.03701295
  0.15120000   0.03447580
  0.15140000   0.16717551
  0.15140000   0.15580566
  0.15140000   0.14521084
  0.15140000   0.13533788
  0.15140000   0.12613735
  0.15140000   0.11756322
  0.15140000   0.10957269
  0.15140000   0.10212587
  0.15140000   0.09518567
  0.15140000   0.08871752
  0.15140000   0.08268924
  0.15140000   0.07707086
  0.15140000   0.07183445
  0.15140000   0.06695400
  0.15140000   0.06240528
  0.15140000   0.05816572
  0.15140000   0.05421427
  0.15140000   0.05053136
  0.15140000   0.04709870
  0.15140000   0.04389928
  0.15140000   0.04091725
  0.15140000   0.03813782
  0.15140000   0.03554723
  0.15160000   0.16986680
  0.15160000   0.15841897
  0.15160000   0.14774445
  0.15160000   0.13779068
  0.15160000   0.12850871
  0.15160000   0.11985298
  0.15160000   0.11178107
  0.15160000   0.10425344
  0.15160000   0.09723328
  0.15160000   0.09068627
  0.15160000   0.08458046
  0.15160000   0.07888603
  0.15160000   0.07357523
  0.15160000   0.06862215
  0.15160000   0.06400269
  0.15160000   0.05969432
  0.15160000   0.05567608
  0.15160000   0.05192842
  0.15160000   0.04843309
  0.15160000   0.04517310
  0.15160000   0.04213258
  0.15160000   0.03929676
  0.15160000   0.03665184
  0.15180000   0.17260100
  0.15180000   0.16107570
  0.15180000   0.15032187
  0.15180000   0.14028755
  0.15180000   0.13092429
  0.15180000   0.12218700
  0.15180000   0.11403364
  0.15180000   0.10642503
  0.15180000   0.09932464
  0.15180000   0.09269844
  0.15180000   0.08651467
  0.15180000   0.08074371
  0.15180000   0.07535796
  0.15180000   0.07033166
  0.15180000   0.06564078
  0.15180000   0.06126291
  0.15180000   0.05717713
  0.15180000   0.05336394
  0.15180000   0.04980514
  0.15180000   0.04648373
  0.15180000   0.04338388
  0.15180000   0.04049079
  0.15180000   0.03779067
  0.15200000   0.17537877
  0.15200000   0.16377655
  0.15200000   0.15294385
  0.15200000   0.14282927
  0.15200000   0.13338491
  0.15200000   0.12456612
  0.15200000   0.11633127
  0.15200000   0.10864153
  0.15200000   0.10146069
  0.15200000   0.09475497
  0.15200000   0.08849284
  0.15200000   0.08264488
  0.15200000   0.07718365
  0.15200000   0.07208353
  0.15200000   0.06732059
  0.15200000   0.06287252
  0.15200000   0.05871847
  0.15200000   0.05483898
  0.15200000   0.05121589
  0.15200000   0.04783224
  0.15200000   0.04467220
  0.15200000   0.04172097
  0.15200000   0.03896475
  0.15220000   0.17820078
  0.15220000   0.16652226
  0.15220000   0.15561114
  0.15220000   0.14541664
  0.15220000   0.13589138
  0.15220000   0.12699118
  0.15220000   0.11867483
  0.15220000   0.11090385
  0.15220000   0.10364235
  0.15220000   0.09685681
  0.15220000   0.09051595
  0.15220000   0.08459055
  0.15220000   0.07905332
  0.15220000   0.07387880
  0.15220000   0.06904317
  0.15220000   0.06452421
  0.15220000   0.06030115
  0.15220000   0.05635460
  0.15220000   0.05266643
  0.15220000   0.04921971
  0.15220000   0.04599862
  0.15220000   0.04298838
  0.15220000   0.04017518
  0.15240000   0.18106772
  0.15240000   0.16931353
  0.15240000   0.15832450
  0.15240000   0.14805045
  0.15240000   0.13844454
  0.15240000   0.12946307
  0.15240000   0.12106523
  0.15240000   0.11321293
  0.15240000   0.10587059
  0.15240000   0.09900497
  0.15240000   0.09258502
  0.15240000   0.08658174
  0.15240000   0.08096802
  0.15240000   0.07571852
  0.15240000   0.07080958
  0.15240000   0.06621906
  0.15240000   0.06192628
  0.15240000   0.05791191
  0.15240000   0.05415787
  0.15240000   0.05064725
  0.15240000   0.04736427
  0.15240000   0.04429414
  0.15240000   0.04142307
  0.15260000   0.18398029
  0.15260000   0.17215110
  0.15260000   0.16108470
  0.15260000   0.15073151
  0.15260000   0.14104524
  0.15260000   0.13198266
  0.15260000   0.12350340
  0.15260000   0.11556972
  0.15260000   0.10814638
  0.15260000   0.10120043
  0.15260000   0.09470107
  0.15260000   0.08861950
  0.15260000   0.08292880
  0.15260000   0.07760379
  0.15260000   0.07262093
  0.15260000   0.06795820
  0.15260000   0.06359499
  0.15260000   0.05951205
  0.15260000   0.05569134
  0.15260000   0.05211601
  0.15260000   0.04877029
  0.15260000   0.04563941
  0.15260000   0.04270957
  0.15280000   0.18693918
  0.15280000   0.17503573
  0.15280000   0.16389254
  0.15280000   0.15346067
  0.15280000   0.14369435
  0.15280000   0.13455086
  0.15280000   0.12599025
  0.15280000   0.11797518
  0.15280000   0.11047072
  0.15280000   0.10344422
  0.15280000   0.09686514
  0.15280000   0.09070490
  0.15280000   0.08493677
  0.15280000   0.07953572
  0.15280000   0.07447836
  0.15280000   0.06974276
  0.15280000   0.06530843
  0.15280000   0.06115618
  0.15280000   0.05726803
  0.15280000   0.05362717
  0.15280000   0.05021786
  0.15280000   0.04702535
  0.15280000   0.04403586
  0.15300000   0.18994512
  0.15300000   0.17796816
  0.15300000   0.16674882
  0.15300000   0.15623874
  0.15300000   0.14639275
  0.15300000   0.13716858
  0.15300000   0.12852675
  0.15300000   0.12043029
  0.15300000   0.11284462
  0.15300000   0.10573739
  0.15300000   0.09907832
  0.15300000   0.09283905
  0.15300000   0.08699304
  0.15300000   0.08151545
  0.15300000   0.07638301
  0.15300000   0.07157392
  0.15300000   0.06706779
  0.15300000   0.06284549
  0.15300000   0.05888913
  0.15300000   0.05518194
  0.15300000   0.05170820
  0.15300000   0.04845321
  0.15300000   0.04540317
  0.15320000   0.19299883
  0.15320000   0.18094918
  0.15320000   0.16965434
  0.15320000   0.15906660
  0.15320000   0.14914132
  0.15320000   0.13983677
  0.15320000   0.13111387
  0.15320000   0.12293607
  0.15320000   0.11526913
  0.15320000   0.10808101
  0.15320000   0.10134169
  0.15320000   0.09502305
  0.15320000   0.08909876
  0.15320000   0.08354414
  0.15320000   0.07833607
  0.15320000   0.07345288
  0.15320000   0.06887428
  0.15320000   0.06458122
  0.15320000   0.06055589
  0.15320000   0.05678156
  0.15320000   0.05324257
  0.15320000   0.04992422
  0.15320000   0.04681275
  0.15340000   0.19610105
  0.15340000   0.18397956
  0.15340000   0.17260994
  0.15340000   0.16194510
  0.15340000   0.15194099
  0.15340000   0.14255635
  0.15340000   0.13375259
  0.15340000   0.12549353
  0.15340000   0.11774530
  0.15340000   0.11047616
  0.15340000   0.10365638
  0.15340000   0.09725806
  0.15340000   0.09125510
  0.15340000   0.08562298
  0.15340000   0.08033875
  0.15340000   0.07538087
  0.15340000   0.07072914
  0.15340000   0.06636463
  0.15340000   0.06226958
  0.15340000   0.05842732
  0.15340000   0.05482224
  0.15340000   0.05143968
  0.15340000   0.04826589
  0.15360000   0.19925252
  0.15360000   0.18706010
  0.15360000   0.17561646
  0.15360000   0.16487514
  0.15360000   0.15479267
  0.15360000   0.14532832
  0.15360000   0.13644392
  0.15360000   0.12810372
  0.15360000   0.12027420
  0.15360000   0.11292396
  0.15360000   0.10602352
  0.15360000   0.09954525
  0.15360000   0.09346325
  0.15360000   0.08775320
  0.15360000   0.08239230
  0.15360000   0.07735914
  0.15360000   0.07263365
  0.15360000   0.06819700
  0.15360000   0.06403149
  0.15360000   0.06012053
  0.15360000   0.05644855
  0.15360000   0.05300092
  0.15360000   0.04976394
  0.15380000   0.20245400
  0.15380000   0.19019159
  0.15380000   0.17867473
  0.15380000   0.16785761
  0.15380000   0.15769732
  0.15380000   0.14815364
  0.15380000   0.13918888
  0.15380000   0.13076770
  0.15380000   0.12285695
  0.15380000   0.11542553
  0.15380000   0.10844428
  0.15380000   0.10188582
  0.15380000   0.09572444
  0.15380000   0.08993604
  0.15380000   0.08449798
  0.15380000   0.07938900
  0.15380000   0.07458914
  0.15380000   0.07007966
  0.15380000   0.06584297
  0.15380000   0.06186254
  0.15380000   0.05812285
  0.15380000   0.05460931
  0.15380000   0.05130825
  0.15400000   0.20570626
  0.15400000   0.19337487
  0.15400000   0.18178564
  0.15400000   0.17089342
  0.15400000   0.16065588
  0.15400000   0.15103332
  0.15400000   0.14198852
  0.15400000   0.13348655
  0.15400000   0.12549465
  0.15400000   0.11798205
  0.15400000   0.11091986
  0.15400000   0.10428098
  0.15400000   0.09803993
  0.15400000   0.09217279
  0.15400000   0.08665711
  0.15400000   0.08147176
  0.15400000   0.07659693
  0.15400000   0.07201398
  0.15400000   0.06770540
  0.15400000   0.06365474
  0.15400000   0.05984654
  0.15400000   0.05626626
  0.15400000   0.05290025
  0.15420000   0.20901007
  0.15420000   0.19661074
  0.15420000   0.18495006
  0.15420000   0.17398350
  0.15420000   0.16366933
  0.15420000   0.15396838
  0.15420000   0.14484390
  0.15420000   0.13626139
  0.15420000   0.12818846
  0.15420000   0.12059468
  0.15420000   0.11345147
  0.15420000   0.10673198
  0.15420000   0.10041098
  0.15420000   0.09446475
  0.15420000   0.08887101
  0.15420000   0.08360879
  0.15420000   0.07865841
  0.15420000   0.07400135
  0.15420000   0.06962019
  0.15420000   0.06549856
  0.15420000   0.06162106
  0.15420000   0.05797321
  0.15420000   0.05454140
  0.15440000   0.21236622
  0.15440000   0.19990007
  0.15440000   0.18816887
  0.15440000   0.17712879
  0.15440000   0.16673865
  0.15440000   0.15695985
  0.15440000   0.14775610
  0.15440000   0.13909333
  0.15440000   0.13093954
  0.15440000   0.12326464
  0.15440000   0.11604035
  0.15440000   0.10924011
  0.15440000   0.10283891
  0.15440000   0.09681326
  0.15440000   0.09114105
  0.15440000   0.08580148
  0.15440000   0.08077500
  0.15440000   0.07604321
  0.15440000   0.07158879
  0.15440000   0.06739547
  0.15440000   0.06344790
  0.15440000   0.05973166
  0.15440000   0.05623318
  0.15460000   0.21577552
  0.15460000   0.20324368
  0.15460000   0.19144299
  0.15460000   0.18033024
  0.15460000   0.16986487
  0.15460000   0.16000879
  0.15460000   0.15072622
  0.15460000   0.14198352
  0.15460000   0.13374907
  0.15460000   0.12599314
  0.15460000   0.11868778
  0.15460000   0.11180667
  0.15460000   0.10532507
  0.15460000   0.09921969
  0.15460000   0.09346863
  0.15460000   0.08805125
  0.15460000   0.08294814
  0.15460000   0.07814102
  0.15460000   0.07361270
  0.15460000   0.06934697
  0.15460000   0.06532857
  0.15460000   0.06154314
  0.15460000   0.05797716
  0.15480000   0.21923877
  0.15480000   0.20664247
  0.15480000   0.19477333
  0.15480000   0.18358882
  0.15480000   0.17304899
  0.15480000   0.16311628
  0.15480000   0.15375539
  0.15480000   0.14493313
  0.15480000   0.13661828
  0.15480000   0.12878146
  0.15480000   0.12139504
  0.15480000   0.11443298
  0.15480000   0.10787081
  0.15480000   0.10168544
  0.15480000   0.09585518
  0.15480000   0.09035956
  0.15480000   0.08517932
  0.15480000   0.08029631
  0.15480000   0.07569344
  0.15480000   0.07135461
  0.15480000   0.06726463
  0.15480000   0.06340922
  0.15480000   0.05977490
  0.15500000   0.22275679
  0.15500000   0.21009729
  0.15500000   0.19816083
  0.15500000   0.18690554
  0.15500000   0.17629206
  0.15500000   0.16628339
  0.15500000   0.15684474
  0.15500000   0.14794334
  0.15500000   0.13954839
  0.15500000   0.13163087
  0.15500000   0.12416345
  0.15500000   0.11712042
  0.15500000   0.11047753
  0.15500000   0.10421195
  0.15500000   0.09830217
  0.15500000   0.09272791
  0.15500000   0.08747006
  0.15500000   0.08251061
  0.15500000   0.07783259
  0.15500000   0.07341999
  0.15500000   0.06925771
  0.15500000   0.06533154
  0.15500000   0.06162807
  0.15520000   0.22633042
  0.15520000   0.21360904
  0.15520000   0.20160643
  0.15520000   0.19028137
  0.15520000   0.17959513
  0.15520000   0.16951125
  0.15520000   0.15999543
  0.15520000   0.15101537
  0.15520000   0.14254067
  0.15520000   0.13454266
  0.15520000   0.12699438
  0.15520000   0.11987037
  0.15520000   0.11314667
  0.15520000   0.10680068
  0.15520000   0.10081110
  0.15520000   0.09515783
  0.15520000   0.08982192
  0.15520000   0.08478552
  0.15520000   0.08003175
  0.15520000   0.07554473
  0.15520000   0.07130945
  0.15520000   0.06731177
  0.15520000   0.06353833
  0.15540000   0.22996049
  0.15540000   0.21717862
  0.15540000   0.20511109
  0.15540000   0.19371735
  0.15540000   0.18295928
  0.15540000   0.17280098
  0.15540000   0.16320866
  0.15540000   0.15415046
  0.15540000   0.14559639
  0.15540000   0.13751819
  0.15540000   0.12988918
  0.15540000   0.12268425
  0.15540000   0.11587969
  0.15540000   0.10945314
  0.15540000   0.10338351
  0.15540000   0.09765089
  0.15540000   0.09223652
  0.15540000   0.08712266
  0.15540000   0.08229260
  0.15540000   0.07773053
  0.15540000   0.07342156
  0.15540000   0.06935162
  0.15540000   0.06550742
  0.15560000   0.23364788
  0.15560000   0.22080695
  0.15560000   0.20867578
  0.15560000   0.19721451
  0.15560000   0.18638560
  0.15560000   0.17615374
  0.15560000   0.16648561
  0.15560000   0.15734985
  0.15560000   0.14871688
  0.15560000   0.14055879
  0.15560000   0.13284928
  0.15560000   0.12556352
  0.15560000   0.11867808
  0.15560000   0.11217085
  0.15560000   0.10602096
  0.15560000   0.10020871
  0.15560000   0.09471548
  0.15560000   0.08952372
  0.15560000   0.08461681
  0.15560000   0.07997910
  0.15560000   0.07559578
  0.15560000   0.07145286
  0.15560000   0.06753714
  0.15580000   0.23739343
  0.15580000   0.22449496
  0.15580000   0.21230150
  0.15580000   0.20077389
  0.15580000   0.18987520
  0.15580000   0.17957067
  0.15580000   0.16982752
  0.15580000   0.16061484
  0.15580000   0.15190345
  0.15580000   0.14366587
  0.15580000   0.13587610
  0.15580000   0.12850965
  0.15580000   0.12154337
  0.15580000   0.11495540
  0.15580000   0.10872508
  0.15580000   0.10283293
  0.15580000   0.09726050
  0.15580000   0.09199039
  0.15580000   0.08700615
  0.15580000   0.08229222
  0.15580000   0.07783391
  0.15580000   0.07361732
  0.15580000   0.06962931
  0.15600000   0.24119803
  0.15600000   0.22824358
  0.15600000   0.21598925
  0.15600000   0.20439656
  0.15600000   0.19342921
  0.15600000   0.18305299
  0.15600000   0.17323564
  0.15600000   0.16394671
  0.15600000   0.15515748
  0.15600000   0.14684082
  0.15600000   0.13897112
  0.15600000   0.13152417
  0.15600000   0.12447712
  0.15600000   0.11780837
  0.15600000   0.11149751
  0.15600000   0.10552523
  0.15600000   0.09987329
  0.15600000   0.09452446
  0.15600000   0.08946240
  0.15600000   0.08467171
  0.15600000   0.08013779
  0.15600000   0.07584685
  0.15600000   0.07178584
  0.15620000   0.24506257
  0.15620000   0.23205377
  0.15620000   0.21974005
  0.15620000   0.20808361
  0.15620000   0.19704877
  0.15620000   0.18660188
  0.15620000   0.17671122
  0.15620000   0.16734681
  0.15620000   0.15848034
  0.15620000   0.15008510
  0.15620000   0.14213581
  0.15620000   0.13460861
  0.15620000   0.12748093
  0.15620000   0.12073142
  0.15620000   0.11433993
  0.15620000   0.10828735
  0.15620000   0.10255563
  0.15620000   0.09712771
  0.15620000   0.09198740
  0.15620000   0.08711944
  0.15620000   0.08250934
  0.15620000   0.07814340
  0.15620000   0.07400867
  0.15640000   0.24898795
  0.15640000   0.23592649
  0.15640000   0.22355493
  0.15640000   0.21183613
  0.15640000   0.20073504
  0.15640000   0.19021859
  0.15640000   0.18025556
  0.15640000   0.17081647
  0.15640000   0.16187345
  0.15640000   0.15340016
  0.15640000   0.14537171
  0.15640000   0.13776455
  0.15640000   0.13055641
  0.15640000   0.12372623
  0.15640000   0.11725406
  0.15640000   0.11112105
  0.15640000   0.10530933
  0.15640000   0.09980199
  0.15640000   0.09458304
  0.15640000   0.08963732
  0.15640000   0.08495048
  0.15640000   0.08050893
  0.15640000   0.07629980
  0.15660000   0.25297508
  0.15660000   0.23986273
  0.15660000   0.22743494
  0.15660000   0.21565524
  0.15660000   0.20448920
  0.15660000   0.19390435
  0.15660000   0.18386998
  0.15660000   0.17435708
  0.15660000   0.16533824
  0.15660000   0.15678751
  0.15660000   0.14868037
  0.15660000   0.14099361
  0.15660000   0.13370525
  0.15660000   0.12679451
  0.15660000   0.12024169
  0.15660000   0.11402815
  0.15660000   0.10813623
  0.15660000   0.10254922
  0.15660000   0.09725126
  0.15660000   0.09222734
  0.15660000   0.08746324
  0.15660000   0.08294549
  0.15660000   0.07866130
  0.15680000   0.25702489
  0.15680000   0.24386349
  0.15680000   0.23138114
  0.15680000   0.21954206
  0.15680000   0.20831247
  0.15680000   0.19766044
  0.15680000   0.18755580
  0.15680000   0.17797004
  0.15680000   0.16887618
  0.15680000   0.16024868
  0.15680000   0.15206339
  0.15680000   0.14429743
  0.15680000   0.13692914
  0.15680000   0.12993801
  0.15680000   0.12330460
  0.15680000   0.11701050
  0.15680000   0.11103825
  0.15680000   0.10537132
  0.15680000   0.09999403
  0.15680000   0.09489151
  0.15680000   0.09004968
  0.15680000   0.08545516
  0.15680000   0.08109530
  0.15700000   0.26113831
  0.15700000   0.24792976
  0.15700000   0.23539461
  0.15700000   0.22349776
  0.15700000   0.21220605
  0.15700000   0.20148814
  0.15700000   0.19131439
  0.15700000   0.18165677
  0.15700000   0.17248875
  0.15700000   0.16378521
  0.15700000   0.15552237
  0.15700000   0.14767769
  0.15700000   0.14022982
  0.15700000   0.13315854
  0.15700000   0.12644466
  0.15700000   0.12007001
  0.15700000   0.11401734
  0.15700000   0.10827030
  0.15700000   0.10281340
  0.15700000   0.09763192
  0.15700000   0.09271190
  0.15700000   0.08804010
  0.15700000   0.08360396
  0.15720000   0.26531628
  0.15720000   0.25206257
  0.15720000   0.23947644
  0.15720000   0.22752349
  0.15720000   0.21617118
  0.15720000   0.20538876
  0.15720000   0.19514712
  0.15720000   0.18541872
  0.15720000   0.17617749
  0.15720000   0.16739870
  0.15720000   0.15905897
  0.15720000   0.15113610
  0.15720000   0.14360906
  0.15720000   0.13645791
  0.15720000   0.12966374
  0.15720000   0.12320860
  0.15720000   0.11707548
  0.15720000   0.11124821
  0.15720000   0.10571146
  0.15720000   0.10045069
  0.15720000   0.09545208
  0.15720000   0.09070252
  0.15720000   0.08618955
  0.15740000   0.26955978
  0.15740000   0.25626294
  0.15740000   0.24362774
  0.15740000   0.23162043
  0.15740000   0.22020913
  0.15740000   0.20936364
  0.15740000   0.19905540
  0.15740000   0.18925737
  0.15740000   0.17994392
  0.15740000   0.17109076
  0.15740000   0.16267487
  0.15740000   0.15467441
  0.15740000   0.14706868
  0.15740000   0.13983802
  0.15740000   0.13296379
  0.15740000   0.12642829
  0.15740000   0.12021472
  0.15740000   0.11430712
  0.15740000   0.10869035
  0.15740000   0.10335002
  0.15740000   0.09827246
  0.15740000   0.09344469
  0.15740000   0.08885438
  0.15760000   0.27386977
  0.15760000   0.26053194
  0.15760000   0.24784964
  0.15760000   0.23578980
  0.15760000   0.22432116
  0.15760000   0.21341412
  0.15760000   0.20304066
  0.15760000   0.19317422
  0.15760000   0.18378964
  0.15760000   0.17486304
  0.15760000   0.16637179
  0.15760000   0.15829441
  0.15760000   0.15061052
  0.15760000   0.14330077
  0.15760000   0.13634678
  0.15760000   0.12973110
  0.15760000   0.12343715
  0.15760000   0.11744920
  0.15760000   0.11175227
  0.15760000   0.10633216
  0.15760000   0.10117533
  0.15760000   0.09626895
  0.15760000   0.09160081
  0.15780000   0.27824723
  0.15780000   0.26487062
  0.15780000   0.25214327
  0.15780000   0.24003280
  0.15780000   0.22850857
  0.15780000   0.21754159
  0.15780000   0.20710435
  0.15780000   0.19717080
  0.15780000   0.18771624
  0.15780000   0.17871721
  0.15780000   0.17015148
  0.15780000   0.16199792
  0.15780000   0.15423648
  0.15780000   0.14684812
  0.15780000   0.13981473
  0.15780000   0.13311911
  0.15780000   0.12674493
  0.15780000   0.12067664
  0.15780000   0.11489949
  0.15780000   0.10939941
  0.15780000   0.10416305
  0.15780000   0.09917771
  0.15780000   0.09443130
  0.15800000   0.28269316
  0.15800000   0.26928005
  0.15800000   0.25650978
  0.15800000   0.24435066
  0.15800000   0.23277269
  0.15800000   0.22174743
  0.15800000   0.21124794
  0.15800000   0.20124866
  0.15800000   0.19172535
  0.15800000   0.18265499
  0.15800000   0.17401572
  0.15800000   0.16578680
  0.15800000   0.15794849
  0.15800000   0.15048207
  0.15800000   0.14336970
  0.15800000   0.13659446
  0.15800000   0.13014024
  0.15800000   0.12399171
  0.15800000   0.11813430
  0.15800000   0.11255414
  0.15800000   0.10723803
  0.15800000   0.10217343
  0.15800000   0.09734837
  0.15820000   0.28720857
  0.15820000   0.27376133
  0.15820000   0.26095036
  0.15820000   0.24874465
  0.15820000   0.23711484
  0.15820000   0.22603307
  0.15820000   0.21547293
  0.15820000   0.20540939
  0.15820000   0.19581864
  0.15820000   0.18667811
  0.15820000   0.17796634
  0.15820000   0.16966294
  0.15820000   0.16174852
  0.15820000   0.15420466
  0.15820000   0.14701383
  0.15820000   0.14015934
  0.15820000   0.13362533
  0.15820000   0.12739670
  0.15820000   0.12145908
  0.15820000   0.11579878
  0.15820000   0.11040277
  0.15820000   0.10525865
  0.15820000   0.10035459
  0.15840000   0.29179448
  0.15840000   0.27831555
  0.15840000   0.26546618
  0.15840000   0.25321604
  0.15840000   0.24153638
  0.15840000   0.23039994
  0.15840000   0.21978085
  0.15840000   0.20965458
  0.15840000   0.19999780
  0.15840000   0.19078835
  0.15840000   0.18200518
  0.15840000   0.17362827
  0.15840000   0.16563858
  0.15840000   0.15801798
  0.15840000   0.15074925
  0.15840000   0.14381596
  0.15840000   0.13720250
  0.15840000   0.13089400
  0.15840000   0.12487627
  0.15840000   0.11913582
  0.15840000   0.11365981
  0.15840000   0.10843597
  0.15840000   0.10345263
  0.15860000   0.29645192
  0.15860000   0.28294383
  0.15860000   0.27005845
  0.15860000   0.25776610
  0.15860000   0.24603868
  0.15860000   0.23484950
  0.15860000   0.22417325
  0.15860000   0.21398588
  0.15860000   0.20426454
  0.15860000   0.19498751
  0.15860000   0.18613414
  0.15860000   0.17768477
  0.15860000   0.16962072
  0.15860000   0.16192417
  0.15860000   0.15457818
  0.15860000   0.14756662
  0.15860000   0.14087412
  0.15860000   0.13448601
  0.15860000   0.12838835
  0.15860000   0.12256783
  0.15860000   0.11701177
  0.15860000   0.11170807
  0.15860000   0.10664522
  0.15880000   0.30118193
  0.15880000   0.28764731
  0.15880000   0.27472838
  0.15880000   0.26239615
  0.15880000   0.25062314
  0.15880000   0.23938325
  0.15880000   0.22865170
  0.15880000   0.21840495
  0.15880000   0.20862063
  0.15880000   0.19927744
  0.15880000   0.19035514
  0.15880000   0.18183445
  0.15880000   0.17369703
  0.15880000   0.16592539
  0.15880000   0.15850289
  0.15880000   0.15141366
  0.15880000   0.14464258
  0.15880000   0.13817523
  0.15880000   0.13199788
  0.15880000   0.12609742
  0.15880000   0.12046134
  0.15880000   0.11507771
  0.15880000   0.10993517
  0.15900000   0.30598557
  0.15900000   0.29242712
  0.15900000   0.27947720
  0.15900000   0.26710751
  0.15900000   0.25529117
  0.15900000   0.24400268
  0.15900000   0.23321780
  0.15900000   0.22291348
  0.15900000   0.21306784
  0.15900000   0.20366000
  0.15900000   0.19467014
  0.15900000   0.18607936
  0.15900000   0.17786965
  0.15900000   0.17002387
  0.15900000   0.16252566
  0.15900000   0.15535944
  0.15900000   0.14851035
  0.15900000   0.14196420
  0.15900000   0.13570748
  0.15900000   0.12972728
  0.15900000   0.12401127
  0.15900000   0.11854771
  0.15900000   0.11332537
  0.15920000   0.31086390
  0.15920000   0.29728442
  0.15920000   0.28430617
  0.15920000   0.27190152
  0.15920000   0.26004422
  0.15920000   0.24870933
  0.15920000   0.23787316
  0.15920000   0.22751319
  0.15920000   0.21760798
  0.15920000   0.20813711
  0.15920000   0.19908115
  0.15920000   0.19042159
  0.15920000   0.18214077
  0.15920000   0.17422188
  0.15920000   0.16664887
  0.15920000   0.15940643
  0.15920000   0.15247996
  0.15920000   0.14585553
  0.15920000   0.13951983
  0.15920000   0.13346016
  0.15920000   0.12766440
  0.15920000   0.12212096
  0.15920000   0.11681879
  0.15940000   0.31581801
  0.15940000   0.30222038
  0.15940000   0.28921656
  0.15940000   0.27677954
  0.15940000   0.26488372
  0.15940000   0.25350474
  0.15940000   0.24261945
  0.15940000   0.23220582
  0.15940000   0.22224289
  0.15940000   0.21271069
  0.15940000   0.20359019
  0.15940000   0.19486326
  0.15940000   0.18651261
  0.15940000   0.17852173
  0.15940000   0.17087491
  0.15940000   0.16355710
  0.15940000   0.15655399
  0.15940000   0.14985187
  0.15940000   0.14343767
  0.15940000   0.13729891
  0.15940000   0.13142364
  0.15940000   0.12580046
  0.15940000   0.12041847
  0.15960000   0.32084899
  0.15960000   0.30723620
  0.15960000   0.29420963
  0.15960000   0.28174296
  0.15960000   0.26981117
  0.15960000   0.25839050
  0.15960000   0.24745833
  0.15960000   0.23699315
  0.15960000   0.22697446
  0.15960000   0.21738273
  0.15960000   0.20819934
  0.15960000   0.19940655
  0.15960000   0.19098742
  0.15960000   0.18292579
  0.15960000   0.17520624
  0.15960000   0.16781402
  0.15960000   0.16073508
  0.15960000   0.15395596
  0.15960000   0.14746383
  0.15960000   0.14124641
  0.15960000   0.13529195
  0.15960000   0.12958924
  0.15960000   0.12412755
  0.15980000   0.32595794
  0.15980000   0.31233306
  0.15980000   0.29928669
  0.15980000   0.28679315
  0.15980000   0.27482805
  0.15980000   0.26336819
  0.15980000   0.25239151
  0.15980000   0.24187698
  0.15980000   0.23180458
  0.15980000   0.22215522
  0.15980000   0.21291071
  0.15980000   0.20405367
  0.15980000   0.19556753
  0.15980000   0.18743647
  0.15980000   0.17964537
  0.15980000   0.17217979
  0.15980000   0.16502593
  0.15980000   0.15817059
  0.15980000   0.15160118
  0.15980000   0.14530563
  0.15980000   0.13927240
  0.15980000   0.13349045
  0.15980000   0.12794924
  0.16000000   0.33114597
  0.16000000   0.31751219
  0.16000000   0.30444905
  0.16000000   0.29193154
  0.16000000   0.27993588
  0.16000000   0.26843945
  0.16000000   0.25742070
  0.16000000   0.24685914
  0.16000000   0.23673519
  0.16000000   0.22703023
  0.16000000   0.21772645
  0.16000000   0.20880688
  0.16000000   0.20025530
  0.16000000   0.19205623
  0.16000000   0.18419487
  0.16000000   0.17665706
  0.16000000   0.16942929
  0.16000000   0.16249862
  0.16000000   0.15585268
  0.16000000   0.14947962
  0.16000000   0.14336811
  0.16000000   0.13750732
  0.16000000   0.13188685
  0.16020000   0.33641422
  0.16020000   0.32277480
  0.16020000   0.30969803
  0.16020000   0.29715956
  0.16020000   0.28513620
  0.16020000   0.27360590
  0.16020000   0.26254767
  0.16020000   0.25194148
  0.16020000   0.24176826
  0.16020000   0.23200981
  0.16020000   0.22264873
  0.16020000   0.21366846
  0.16020000   0.20505312
  0.16020000   0.19678757
  0.16020000   0.18885734
  0.16020000   0.18124857
  0.16020000   0.17394800
  0.16020000   0.16694297
  0.16020000   0.16022134
  0.16020000   0.15377149
  0.16020000   0.14758231
  0.16020000   0.14164314
  0.16020000   0.13594377
  0.16040000   0.34176382
  0.16040000   0.32812213
  0.16040000   0.31503499
  0.16040000   0.30247865
  0.16040000   0.29043056
  0.16040000   0.27886923
  0.16040000   0.26777418
  0.16040000   0.25712590
  0.16040000   0.24690579
  0.16040000   0.23709608
  0.16040000   0.22767980
  0.16040000   0.21864075
  0.16040000   0.20996344
  0.16040000   0.20163307
  0.16040000   0.19363546
  0.16040000   0.18595707
  0.16040000   0.17858493
  0.16040000   0.17150663
  0.16040000   0.16471026
  0.16040000   0.15818445
  0.16040000   0.15191828
  0.16040000   0.14590130
  0.16040000   0.14012349
  0.16060000   0.34719592
  0.16060000   0.33355545
  0.16060000   0.32046127
  0.16060000   0.30789029
  0.16060000   0.29582054
  0.16060000   0.28423110
  0.16060000   0.27310203
  0.16060000   0.26241432
  0.16060000   0.25214981
  0.16060000   0.24229119
  0.16060000   0.23282191
  0.16060000   0.22372614
  0.16060000   0.21498876
  0.16060000   0.20659532
  0.16060000   0.19853195
  0.16060000   0.19078542
  0.16060000   0.18334304
  0.16060000   0.17619265
  0.16060000   0.16932261
  0.16060000   0.16272175
  0.16060000   0.15637940
  0.16060000   0.15028528
  0.16060000   0.14442957
  0.16080000   0.35271168
  0.16080000   0.33907600
  0.16080000   0.32597825
  0.16080000   0.31339595
  0.16080000   0.30130774
  0.16080000   0.28969325
  0.16080000   0.27853307
  0.16080000   0.26780867
  0.16080000   0.25750239
  0.16080000   0.24759733
  0.16080000   0.23807735
  0.16080000   0.22892704
  0.16080000   0.22013162
  0.16080000   0.21167698
  0.16080000   0.20354959
  0.16080000   0.19573651
  0.16080000   0.18822533
  0.16080000   0.18100416
  0.16080000   0.17406161
  0.16080000   0.16738676
  0.16080000   0.16096912
  0.16080000   0.15479864
  0.16080000   0.14886570
  0.16100000   0.35831228
  0.16100000   0.34468509
  0.16100000   0.33158732
  0.16100000   0.31899714
  0.16100000   0.30689377
  0.16100000   0.29525740
  0.16100000   0.28406912
  0.16100000   0.27331093
  0.16100000   0.26296561
  0.16100000   0.25301670
  0.16100000   0.24344848
  0.16100000   0.23424591
  0.16100000   0.22539460
  0.16100000   0.21688077
  0.16100000   0.20869121
  0.16100000   0.20081329
  0.16100000   0.19323488
  0.16100000   0.18594436
  0.16100000   0.17893059
  0.16100000   0.17218289
  0.16100000   0.16569099
  0.16100000   0.15944505
  0.16100000   0.15343562
  0.16120000   0.36399890
  0.16120000   0.35038399
  0.16120000   0.33728989
  0.16120000   0.32469538
  0.16120000   0.31258027
  0.16120000   0.30092530
  0.16120000   0.28971209
  0.16120000   0.27892311
  0.16120000   0.26854160
  0.16120000   0.25855156
  0.16120000   0.24893767
  0.16120000   0.23968528
  0.16120000   0.23078035
  0.16120000   0.22220945
  0.16120000   0.21395970
  0.16120000   0.20601878
  0.16120000   0.19837483
  0.16120000   0.19101651
  0.16120000   0.18393294
  0.16120000   0.17711366
  0.16120000   0.17054863
  0.16120000   0.16422823
  0.16120000   0.15814320
  0.16140000   0.36977274
  0.16140000   0.35617401
  0.16140000   0.34308737
  0.16140000   0.33049221
  0.16140000   0.31836890
  0.16140000   0.30669873
  0.16140000   0.29546386
  0.16140000   0.28464722
  0.16140000   0.27423253
  0.16140000   0.26420421
  0.16140000   0.25454734
  0.16140000   0.24524767
  0.16140000   0.23629153
  0.16140000   0.22766583
  0.16140000   0.21935801
  0.16140000   0.21135604
  0.16140000   0.20364838
  0.16140000   0.19622395
  0.16140000   0.18907211
  0.16140000   0.18218265
  0.16140000   0.17554576
  0.16140000   0.16915203
  0.16140000   0.16299241
  0.16160000   0.37563499
  0.16160000   0.36205647
  0.16160000   0.34898119
  0.16160000   0.33638916
  0.16160000   0.32426132
  0.16160000   0.31257951
  0.16160000   0.30132637
  0.16160000   0.29048534
  0.16160000   0.28004058
  0.16160000   0.26997695
  0.16160000   0.26027995
  0.16160000   0.25093569
  0.16160000   0.24193088
  0.16160000   0.23325277
  0.16160000   0.22488913
  0.16160000   0.21682823
  0.16160000   0.20905881
  0.16160000   0.20157008
  0.16160000   0.19435164
  0.16160000   0.18739354
  0.16160000   0.18068619
  0.16160000   0.17422039
  0.16160000   0.16798728
  0.16180000   0.38158688
  0.16180000   0.36803270
  0.16180000   0.35497282
  0.16180000   0.34238783
  0.16180000   0.33025925
  0.16180000   0.31856944
  0.16180000   0.30730157
  0.16180000   0.29643954
  0.16180000   0.28596798
  0.16180000   0.27587216
  0.16180000   0.26613799
  0.16180000   0.25675198
  0.16180000   0.24770118
  0.16180000   0.23897320
  0.16180000   0.23055612
  0.16180000   0.22243853
  0.16180000   0.21460946
  0.16180000   0.20705837
  0.16180000   0.19977516
  0.16180000   0.19275008
  0.16180000   0.18597380
  0.16180000   0.17943732
  0.16180000   0.17313200
  0.16200000   0.38762964
  0.16200000   0.37410405
  0.16200000   0.36106370
  0.16200000   0.34848978
  0.16200000   0.33636438
  0.16200000   0.32467037
  0.16200000   0.31339143
  0.16200000   0.30251194
  0.16200000   0.29201697
  0.16200000   0.28189222
  0.16200000   0.27212400
  0.16200000   0.26269921
  0.16200000   0.25360525
  0.16200000   0.24483007
  0.16200000   0.23636210
  0.16200000   0.22819021
  0.16200000   0.22030372
  0.16200000   0.21269239
  0.16200000   0.20534635
  0.16200000   0.19825611
  0.16200000   0.19141257
  0.16200000   0.18480695
  0.16200000   0.17843081
  0.16220000   0.39376449
  0.16220000   0.38027185
  0.16220000   0.36725531
  0.16220000   0.35469663
  0.16220000   0.34257845
  0.16220000   0.33088417
  0.16220000   0.31959797
  0.16220000   0.30870468
  0.16220000   0.29818984
  0.16220000   0.28803956
  0.16220000   0.27824055
  0.16220000   0.26878009
  0.16220000   0.25964596
  0.16220000   0.25082642
  0.16220000   0.24231023
  0.16220000   0.23408658
  0.16220000   0.22614508
  0.16220000   0.21847575
  0.16220000   0.21106899
  0.16220000   0.20391556
  0.16220000   0.19700658
  0.16220000   0.19033350
  0.16220000   0.18388808
  0.16240000   0.39999268
  0.16240000   0.38653749
  0.16240000   0.37354915
  0.16240000   0.36101000
  0.16240000   0.34890321
  0.16240000   0.33721273
  0.16240000   0.32592320
  0.16240000   0.31501994
  0.16240000   0.30448890
  0.16240000   0.29431664
  0.16240000   0.28449026
  0.16240000   0.27499741
  0.16240000   0.26582622
  0.16240000   0.25696531
  0.16240000   0.24840375
  0.16240000   0.24013104
  0.16240000   0.23213707
  0.16240000   0.22441215
  0.16240000   0.21694693
  0.16240000   0.20973243
  0.16240000   0.20275998
  0.16240000   0.19602127
  0.16240000   0.18950828
  0.16260000   0.40631548
  0.16260000   0.39290234
  0.16260000   0.37994671
  0.16260000   0.36743150
  0.16260000   0.35534043
  0.16260000   0.34365795
  0.16260000   0.33236917
  0.16260000   0.32145989
  0.16260000   0.31091650
  0.16260000   0.30072596
  0.16260000   0.29087577
  0.16260000   0.28135395
  0.16260000   0.27214899
  0.16260000   0.26324986
  0.16260000   0.25464593
  0.16260000   0.24632702
  0.16260000   0.23828330
  0.16260000   0.23050536
  0.16260000   0.22298411
  0.16260000   0.21571081
  0.16260000   0.20867704
  0.16260000   0.20187470
  0.16260000   0.19529598
  0.16280000   0.41273413
  0.16280000   0.39936778
  0.16280000   0.38644951
  0.16280000   0.37396280
  0.16280000   0.36189190
  0.16280000   0.35022175
  0.16280000   0.33893796
  0.16280000   0.32802678
  0.16280000   0.31747501
  0.16280000   0.30727005
  0.16280000   0.29739977
  0.16280000   0.28785257
  0.16280000   0.27861730
  0.16280000   0.26968325
  0.16280000   0.26104012
  0.16280000   0.25267803
  0.16280000   0.24458744
  0.16280000   0.23675922
  0.16280000   0.22918453
  0.16280000   0.22185488
  0.16280000   0.21476210
  0.16280000   0.20789829
  0.16280000   0.20125587
  0.16300000   0.41924993
  0.16300000   0.40593521
  0.16300000   0.39305908
  0.16300000   0.38060556
  0.16300000   0.36855942
  0.16300000   0.35690609
  0.16300000   0.34563167
  0.16300000   0.33472284
  0.16300000   0.32416684
  0.16300000   0.31395146
  0.16300000   0.30406499
  0.16300000   0.29449616
  0.16300000   0.28523419
  0.16300000   0.27626870
  0.16300000   0.26758971
  0.16300000   0.25918764
  0.16300000   0.25105324
  0.16300000   0.24317764
  0.16300000   0.23555228
  0.16300000   0.22816891
  0.16300000   0.22101959
  0.16300000   0.21409666
  0.16300000   0.20739273
  0.16320000   0.42586414
  0.16320000   0.41260604
  0.16320000   0.39977696
  0.16320000   0.38736145
  0.16320000   0.37534480
  0.16320000   0.36371293
  0.16320000   0.35245240
  0.16320000   0.34155034
  0.16320000   0.33099441
  0.16320000   0.32077280
  0.16320000   0.31087418
  0.16320000   0.30128765
  0.16320000   0.29200277
  0.16320000   0.28300949
  0.16320000   0.27429815
  0.16320000   0.26585947
  0.16320000   0.25768450
  0.16320000   0.24976461
  0.16320000   0.24209153
  0.16320000   0.23465724
  0.16320000   0.22745405
  0.16320000   0.22047451
  0.16320000   0.21371145
  0.16340000   0.43257805
  0.16340000   0.41938169
  0.16340000   0.40660470
  0.16340000   0.39423216
  0.16340000   0.38224988
  0.16340000   0.37064426
  0.16340000   0.35940231
  0.16340000   0.34851159
  0.16340000   0.33796019
  0.16340000   0.32773669
  0.16340000   0.31783013
  0.16340000   0.30823000
  0.16340000   0.29892617
  0.16340000   0.28990894
  0.16340000   0.28116895
  0.16340000   0.27269722
  0.16340000   0.26448508
  0.16340000   0.25652420
  0.16340000   0.24880653
  0.16340000   0.24132432
  0.16340000   0.23407010
  0.16340000   0.22703666
  0.16340000   0.22021704
  0.16360000   0.43939297
  0.16360000   0.42626358
  0.16360000   0.41354385
  0.16360000   0.40121940
  0.16360000   0.38927651
  0.16360000   0.37770207
  0.16360000   0.36648353
  0.16360000   0.35560890
  0.16360000   0.34506666
  0.16360000   0.33484579
  0.16360000   0.32493569
  0.16360000   0.31532622
  0.16360000   0.30600759
  0.16360000   0.29697042
  0.16360000   0.28820567
  0.16360000   0.27970463
  0.16360000   0.27145895
  0.16360000   0.26346053
  0.16360000   0.25570160
  0.16360000   0.24817466
  0.16360000   0.24087246
  0.16360000   0.23378803
  0.16360000   0.22691460
  0.16380000   0.44631019
  0.16380000   0.43325315
  0.16380000   0.42059600
  0.16380000   0.40832489
  0.16380000   0.39642656
  0.16380000   0.38488839
  0.16380000   0.37369826
  0.16380000   0.36284461
  0.16380000   0.35231633
  0.16380000   0.34210277
  0.16380000   0.33219372
  0.16380000   0.32257936
  0.16380000   0.31325026
  0.16380000   0.30419736
  0.16380000   0.29541191
  0.16380000   0.28688552
  0.16380000   0.27861008
  0.16380000   0.27057780
  0.16380000   0.26278114
  0.16380000   0.25521286
  0.16380000   0.24786594
  0.16380000   0.24073361
  0.16380000   0.23380936
  0.16400000   0.45333103
  0.16400000   0.44035184
  0.16400000   0.42776273
  0.16400000   0.41555033
  0.16400000   0.40370190
  0.16400000   0.39220524
  0.16400000   0.38104870
  0.16400000   0.37022110
  0.16400000   0.35971174
  0.16400000   0.34951036
  0.16400000   0.33960711
  0.16400000   0.32999251
  0.16400000   0.32065746
  0.16400000   0.31159321
  0.16400000   0.30279134
  0.16400000   0.29424373
  0.16400000   0.28594256
  0.16400000   0.27788028
  0.16400000   0.27004964
  0.16400000   0.26244361
  0.16400000   0.25505542
  0.16400000   0.24787853
  0.16400000   0.24090663
  0.16420000   0.46045679
  0.16420000   0.44756110
  0.16420000   0.43504561
  0.16420000   0.42289749
  0.16420000   0.41110442
  0.16420000   0.39965469
  0.16420000   0.38853705
  0.16420000   0.37774074
  0.16420000   0.36725545
  0.16420000   0.35707130
  0.16420000   0.34717878
  0.16420000   0.33756877
  0.16420000   0.32823249
  0.16420000   0.31916150
  0.16420000   0.31034768
  0.16420000   0.30178319
  0.16420000   0.29346050
  0.16420000   0.28537232
  0.16420000   0.27751164
  0.16420000   0.26987168
  0.16420000   0.26244591
  0.16420000   0.25522799
  0.16420000   0.24821183
  0.16440000   0.46768880
  0.16440000   0.45488237
  0.16440000   0.44244626
  0.16440000   0.43036809
  0.16440000   0.41863603
  0.16440000   0.40723878
  0.16440000   0.39616554
  0.16440000   0.38540594
  0.16440000   0.37495005
  0.16440000   0.36478836
  0.16440000   0.35491170
  0.16440000   0.34531130
  0.16440000   0.33597871
  0.16440000   0.32690578
  0.16440000   0.31808468
  0.16440000   0.30950788
  0.16440000   0.30116810
  0.16440000   0.29305832
  0.16440000   0.28517177
  0.16440000   0.27750193
  0.16440000   0.27004247
  0.16440000   0.26278729
  0.16440000   0.25573051
  0.16460000   0.47502839
  0.16460000   0.46231713
  0.16460000   0.44996627
  0.16460000   0.43796389
  0.16460000   0.42629863
  0.16460000   0.41495961
  0.16460000   0.40393643
  0.16460000   0.39321912
  0.16460000   0.38279814
  0.16460000   0.37266432
  0.16460000   0.36280886
  0.16460000   0.35322330
  0.16460000   0.34389950
  0.16460000   0.33482963
  0.16460000   0.32600616
  0.16460000   0.31742182
  0.16460000   0.30906960
  0.16460000   0.30094274
  0.16460000   0.29303473
  0.16460000   0.28533927
  0.16460000   0.27785026
  0.16460000   0.27056183
  0.16460000   0.26346829
  0.16480000   0.48247687
  0.16480000   0.46986684
  0.16480000   0.45760726
  0.16480000   0.44568667
  0.16480000   0.43409415
  0.16480000   0.42281925
  0.16480000   0.41185197
  0.16480000   0.40118273
  0.16480000   0.39080234
  0.16480000   0.38070201
  0.16480000   0.37087326
  0.16480000   0.36130796
  0.16480000   0.35199828
  0.16480000   0.34293671
  0.16480000   0.33411597
  0.16480000   0.32552908
  0.16480000   0.31716930
  0.16480000   0.30903013
  0.16480000   0.30110529
  0.16480000   0.29338871
  0.16480000   0.28587453
  0.16480000   0.27855709
  0.16480000   0.27143090
  0.16500000   0.49003558
  0.16500000   0.47753297
  0.16500000   0.46537083
  0.16500000   0.45353818
  0.16500000   0.44202452
  0.16500000   0.43081980
  0.16500000   0.41991443
  0.16500000   0.40929921
  0.16500000   0.39896530
  0.16500000   0.38890426
  0.16500000   0.37910794
  0.16500000   0.36956854
  0.16500000   0.36027853
  0.16500000   0.35123067
  0.16500000   0.34241800
  0.16500000   0.33383379
  0.16500000   0.32547157
  0.16500000   0.31732508
  0.16500000   0.30938827
  0.16500000   0.30165533
  0.16500000   0.29412060
  0.16500000   0.28677865
  0.16500000   0.27962418
  0.16520000   0.49770585
  0.16520000   0.48531698
  0.16520000   0.47325862
  0.16520000   0.46152020
  0.16520000   0.45009167
  0.16520000   0.43896337
  0.16520000   0.42812610
  0.16520000   0.41757103
  0.16520000   0.40728968
  0.16520000   0.39727393
  0.16520000   0.38751597
  0.16520000   0.37800830
  0.16520000   0.36874371
  0.16520000   0.35971524
  0.16520000   0.35091619
  0.16520000   0.34234012
  0.16520000   0.33398080
  0.16520000   0.32583222
  0.16520000   0.31788858
  0.16520000   0.31014427
  0.16520000   0.30259388
  0.16520000   0.29523217
  0.16520000   0.28805406
  0.16540000   0.50548901
  0.16540000   0.49322036
  0.16540000   0.48127223
  0.16540000   0.46963452
  0.16540000   0.45829755
  0.16540000   0.44725208
  0.16540000   0.43648928
  0.16540000   0.42600067
  0.16540000   0.41577814
  0.16540000   0.40581388
  0.16540000   0.39610042
  0.16540000   0.38663055
  0.16540000   0.37739734
  0.16540000   0.36839414
  0.16540000   0.35961452
  0.16540000   0.35105228
  0.16540000   0.34270145
  0.16540000   0.33455627
  0.16540000   0.32661117
  0.16540000   0.31886076
  0.16540000   0.31129985
  0.16540000   0.30392339
  0.16540000   0.29672653
  0.16560000   0.51338640
  0.16560000   0.50124457
  0.16560000   0.48941330
  0.16560000   0.47788290
  0.16560000   0.46664409
  0.16560000   0.45568804
  0.16560000   0.44500625
  0.16560000   0.43459062
  0.16560000   0.42443337
  0.16560000   0.41452701
  0.16560000   0.40486438
  0.16560000   0.39543858
  0.16560000   0.38624297
  0.16560000   0.37727115
  0.16560000   0.36851698
  0.16560000   0.35997452
  0.16560000   0.35163803
  0.16560000   0.34350199
  0.16560000   0.33556105
  0.16560000   0.32781007
  0.16560000   0.32024405
  0.16560000   0.31285815
  0.16560000   0.30564772
  0.16580000   0.52139935
  0.16580000   0.50939109
  0.16580000   0.49768345
  0.16580000   0.48626713
  0.16580000   0.47513326
  0.16580000   0.46427337
  0.16580000   0.45367933
  0.16580000   0.44334338
  0.16580000   0.43325806
  0.16580000   0.42341622
  0.16580000   0.41381098
  0.16580000   0.40443574
  0.16580000   0.39528414
  0.16580000   0.38635007
  0.16580000   0.37762762
  0.16580000   0.36911111
  0.16580000   0.36079505
  0.16580000   0.35267415
  0.16580000   0.34474329
  0.16580000   0.33699753
  0.16580000   0.32943209
  0.16580000   0.32204233
  0.16580000   0.31482379
  0.16600000   0.52952918
  0.16600000   0.51766140
  0.16600000   0.50608430
  0.16600000   0.49478900
  0.16600000   0.48376700
  0.16600000   0.47301020
  0.16600000   0.46251082
  0.16600000   0.45226144
  0.16600000   0.44225491
  0.16600000   0.43248440
  0.16600000   0.42294333
  0.16600000   0.41362537
  0.16600000   0.40452445
  0.16600000   0.39563470
  0.16600000   0.38695049
  0.16600000   0.37846638
  0.16600000   0.37017711
  0.16600000   0.36207761
  0.16600000   0.35416300
  0.16600000   0.34642854
  0.16600000   0.33886965
  0.16600000   0.33148190
  0.16600000   0.32426101
  0.16620000   0.53777722
  0.16620000   0.52605695
  0.16620000   0.51461747
  0.16620000   0.50345027
  0.16620000   0.49254725
  0.16620000   0.48190065
  0.16620000   0.47150303
  0.16620000   0.46134730
  0.16620000   0.45142663
  0.16620000   0.44173448
  0.16620000   0.43226456
  0.16620000   0.42301083
  0.16620000   0.41396747
  0.16620000   0.40512888
  0.16620000   0.39648968
  0.16620000   0.38804465
  0.16620000   0.37978879
  0.16620000   0.37171724
  0.16620000   0.36382532
  0.16620000   0.35610852
  0.16620000   0.34856244
  0.16620000   0.34118287
  0.16620000   0.33396570
  0.16640000   0.54614480
  0.16640000   0.53457922
  0.16640000   0.52328457
  0.16640000   0.51225273
  0.16640000   0.50147596
  0.16640000   0.49094684
  0.16640000   0.48065827
  0.16640000   0.47060347
  0.16640000   0.46077592
  0.16640000   0.45116936
  0.16640000   0.44177781
  0.16640000   0.43259547
  0.16640000   0.42361680
  0.16640000   0.41483645
  0.16640000   0.40624928
  0.16640000   0.39785030
  0.16640000   0.38963473
  0.16640000   0.38159793
  0.16640000   0.37373545
  0.16640000   0.36604295
  0.16640000   0.35851626
  0.16640000   0.35115133
  0.16640000   0.34394424
  0.16660000   0.55463322
  0.16660000   0.54322965
  0.16660000   0.53208721
  0.16660000   0.52119815
  0.16660000   0.51055506
  0.16660000   0.50015088
  0.16660000   0.48997883
  0.16660000   0.48003243
  0.16660000   0.47030547
  0.16660000   0.46079197
  0.16660000   0.45148620
  0.16660000   0.44238267
  0.16660000   0.43347606
  0.16660000   0.42476127
  0.16660000   0.41623339
  0.16660000   0.40788768
  0.16660000   0.39971956
  0.16660000   0.39172462
  0.16660000   0.38389859
  0.16660000   0.37623734
  0.16660000   0.36873689
  0.16660000   0.36139338
  0.16660000   0.35420307
  0.16680000   0.56324380
  0.16680000   0.55200971
  0.16680000   0.54102699
  0.16680000   0.53028827
  0.16680000   0.51978648
  0.16680000   0.50951488
  0.16680000   0.49946701
  0.16680000   0.48963668
  0.16680000   0.48001797
  0.16680000   0.47060519
  0.16680000   0.46139288
  0.16680000   0.45237578
  0.16680000   0.44354883
  0.16680000   0.43490718
  0.16680000   0.42644614
  0.16680000   0.41816118
  0.16680000   0.41004795
  0.16680000   0.40210223
  0.16680000   0.39431996
  0.16680000   0.38669722
  0.16680000   0.37923019
  0.16680000   0.37191519
  0.16680000   0.36474868
  0.16700000   0.57197783
  0.16700000   0.56092082
  0.16700000   0.55010551
  0.16700000   0.53952486
  0.16700000   0.52917214
  0.16700000   0.51904094
  0.16700000   0.50912508
  0.16700000   0.49941869
  0.16700000   0.48991612
  0.16700000   0.48061194
  0.16700000   0.47150095
  0.16700000   0.46257815
  0.16700000   0.45383872
  0.16700000   0.44527803
  0.16700000   0.43689161
  0.16700000   0.42867517
  0.16700000   0.42062454
  0.16700000   0.41273571
  0.16700000   0.40500482
  0.16700000   0.39742812
  0.16700000   0.39000200
  0.16700000   0.38272294
  0.16700000   0.37558756
  0.16720000   0.58083660
  0.16720000   0.56996441
  0.16720000   0.55932433
  0.16720000   0.54890964
  0.16720000   0.53871394
  0.16720000   0.52873112
  0.16720000   0.51895532
  0.16720000   0.50938093
  0.16720000   0.50000257
  0.16720000   0.49081509
  0.16720000   0.48181353
  0.16720000   0.47299313
  0.16720000   0.46434931
  0.16720000   0.45587766
  0.16720000   0.44757393
  0.16720000   0.43943402
  0.16720000   0.43145398
  0.16720000   0.42363000
  0.16720000   0.41595840
  0.16720000   0.40843561
  0.16720000   0.40105819
  0.16720000   0.39382281
  0.16720000   0.38672624
  0.16740000   0.58982139
  0.16740000   0.57914191
  0.16740000   0.56868502
  0.16740000   0.55844433
  0.16740000   0.54841376
  0.16740000   0.53858750
  0.16740000   0.52895996
  0.16740000   0.51952582
  0.16740000   0.51027997
  0.16740000   0.50121750
  0.16740000   0.49233370
  0.16740000   0.48362403
  0.16740000   0.47508416
  0.16740000   0.46670987
  0.16740000   0.45849714
  0.16740000   0.45044208
  0.16740000   0.44254091
  0.16740000   0.43479003
  0.16740000   0.42718593
  0.16740000   0.41972522
  0.16740000   0.41240463
  0.16740000   0.40522100
  0.16740000   0.39817126
  0.16760000   0.59893345
  0.16760000   0.58845470
  0.16760000   0.57818912
  0.16760000   0.56813064
  0.16760000   0.55827347
  0.16760000   0.54861210
  0.16760000   0.53914123
  0.16760000   0.52985579
  0.16760000   0.52075094
  0.16760000   0.51182200
  0.16760000   0.50306450
  0.16760000   0.49447414
  0.16760000   0.48604679
  0.16760000   0.47777846
  0.16760000   0.46966532
  0.16760000   0.46170367
  0.16760000   0.45388994
  0.16760000   0.44622070
  0.16760000   0.43869261
  0.16760000   0.43130246
  0.16760000   0.42404715
  0.16760000   0.41692368
  0.16760000   0.40992913
  0.16780000   0.60817403
  0.16780000   0.59790417
  0.16780000   0.58783816
  0.16780000   0.57797023
  0.16780000   0.56829491
  0.16780000   0.55880695
  0.16780000   0.54950133
  0.16780000   0.54037323
  0.16780000   0.53141806
  0.16780000   0.52263139
  0.16780000   0.51400897
  0.16780000   0.50554672
  0.16780000   0.49724071
  0.16780000   0.48908718
  0.16780000   0.48108247
  0.16780000   0.47322308
  0.16780000   0.46550564
  0.16780000   0.45792686
  0.16780000   0.45048361
  0.16780000   0.44317283
  0.16780000   0.43599157
  0.16780000   0.42893699
  0.16780000   0.42200634
  0.16800000   0.61754436
  0.16800000   0.60749168
  0.16800000   0.59763363
  0.16800000   0.58796477
  0.16800000   0.57847989
  0.16800000   0.56917402
  0.16800000   0.56004241
  0.16800000   0.55108049
  0.16800000   0.54228389
  0.16800000   0.53364843
  0.16800000   0.52517008
  0.16800000   0.51684496
  0.16800000   0.50866937
  0.16800000   0.50063972
  0.16800000   0.49275255
  0.16800000   0.48500455
  0.16800000   0.47739251
  0.16800000   0.46991334
  0.16800000   0.46256404
  0.16800000   0.45534174
  0.16800000   0.44824364
  0.16800000   0.44126704
  0.16800000   0.43440933
  0.16820000   0.62704563
  0.16820000   0.61721855
  0.16820000   0.60757702
  0.16820000   0.59811587
  0.16820000   0.58883019
  0.16820000   0.57971527
  0.16820000   0.57076660
  0.16820000   0.56197986
  0.16820000   0.55335093
  0.16820000   0.54487584
  0.16820000   0.53655076
  0.16820000   0.52837204
  0.16820000   0.52033616
  0.16820000   0.51243972
  0.16820000   0.50467947
  0.16820000   0.49705225
  0.16820000   0.48955502
  0.16820000   0.48218487
  0.16820000   0.47493897
  0.16820000   0.46781457
  0.16820000   0.46080905
  0.16820000   0.45391984
  0.16820000   0.44714448
  0.16840000   0.63667904
  0.16840000   0.62708611
  0.16840000   0.61766976
  0.16840000   0.60842513
  0.16840000   0.59934755
  0.16840000   0.59043259
  0.16840000   0.58167598
  0.16840000   0.57307363
  0.16840000   0.56462165
  0.16840000   0.55631627
  0.16840000   0.54815389
  0.16840000   0.54013104
  0.16840000   0.53224441
  0.16840000   0.52449077
  0.16840000   0.51686705
  0.16840000   0.50937026
  0.16840000   0.50199755
  0.16840000   0.49474613
  0.16840000   0.48761334
  0.16840000   0.48059659
  0.16840000   0.47369339
  0.16840000   0.46690133
  0.16840000   0.46021806
  0.16860000   0.64644573
  0.16860000   0.63709562
  0.16860000   0.62791328
  0.16860000   0.61889410
  0.16860000   0.61003369
  0.16860000   0.60132786
  0.16860000   0.59277258
  0.16860000   0.58436400
  0.16860000   0.57609842
  0.16860000   0.56797231
  0.16860000   0.55998226
  0.16860000   0.55212499
  0.16860000   0.54439737
  0.16860000   0.53679636
  0.16860000   0.52931904
  0.16860000   0.52196261
  0.16860000   0.51472436
  0.16860000   0.50760167
  0.16860000   0.50059202
  0.16860000   0.49369297
  0.16860000   0.48690217
  0.16860000   0.48021732
  0.16860000   0.47363624
  0.16880000   0.65634684
  0.16880000   0.64724834
  0.16880000   0.63830893
  0.16880000   0.62952428
  0.16880000   0.62089025
  0.16880000   0.61240288
  0.16880000   0.60405838
  0.16880000   0.59585311
  0.16880000   0.58778360
  0.16880000   0.57984650
  0.16880000   0.57203861
  0.16880000   0.56435683
  0.16880000   0.55679820
  0.16880000   0.54935987
  0.16880000   0.54203908
  0.16880000   0.53483319
  0.16880000   0.52773963
  0.16880000   0.52075594
  0.16880000   0.51387975
  0.16880000   0.50710874
  0.16880000   0.50044071
  0.16880000   0.49387350
  0.16880000   0.48740502
  0.16900000   0.66638345
  0.16900000   0.65754548
  0.16900000   0.64885807
  0.16900000   0.64031716
  0.16900000   0.63191884
  0.16900000   0.62365941
  0.16900000   0.61553528
  0.16900000   0.60754305
  0.16900000   0.59967943
  0.16900000   0.59194128
  0.16900000   0.58432557
  0.16900000   0.57682940
  0.16900000   0.56944997
  0.16900000   0.56218460
  0.16900000   0.55503070
  0.16900000   0.54798576
  0.16900000   0.54104738
  0.16900000   0.53421324
  0.16900000   0.52748110
  0.16900000   0.52084879
  0.16900000   0.51431422
  0.16900000   0.50787535
  0.16900000   0.50153025
  0.16920000   0.67655664
  0.16920000   0.66798821
  0.16920000   0.65956198
  0.16920000   0.65127414
  0.16920000   0.64312102
  0.16920000   0.63509914
  0.16920000   0.62720514
  0.16920000   0.61943582
  0.16920000   0.61178808
  0.16920000   0.60425898
  0.16920000   0.59684567
  0.16920000   0.58954543
  0.16920000   0.58235561
  0.16920000   0.57527371
  0.16920000   0.56829727
  0.16920000   0.56142395
  0.16920000   0.55465150
  0.16920000   0.54797771
  0.16920000   0.54140049
  0.16920000   0.53491780
  0.16920000   0.52852767
  0.16920000   0.52222819
  0.16920000   0.51601753
  0.16940000   0.68686742
  0.16940000   0.67857766
  0.16940000   0.67042190
  0.16940000   0.66239658
  0.16940000   0.65449827
  0.16940000   0.64672370
  0.16940000   0.63906972
  0.16940000   0.63153333
  0.16940000   0.62411163
  0.16940000   0.61680186
  0.16940000   0.60960134
  0.16940000   0.60250752
  0.16940000   0.59551793
  0.16940000   0.58863020
  0.16940000   0.58184203
  0.16940000   0.57515123
  0.16940000   0.56855567
  0.16940000   0.56205330
  0.16940000   0.55564213
  0.16940000   0.54932026
  0.16940000   0.54308584
  0.16940000   0.53693708
  0.16940000   0.53087224
  0.16960000   0.69731679
  0.16960000   0.68931491
  0.16960000   0.68143902
  0.16960000   0.67368579
  0.16960000   0.66605201
  0.16960000   0.65853462
  0.16960000   0.65113069
  0.16960000   0.64383740
  0.16960000   0.63665205
  0.16960000   0.62957204
  0.16960000   0.62259488
  0.16960000   0.61571816
  0.16960000   0.60893959
  0.16960000   0.60225693
  0.16960000   0.59566804
  0.16960000   0.58917086
  0.16960000   0.58276340
  0.16960000   0.57644373
  0.16960000   0.57020999
  0.16960000   0.56406041
  0.16960000   0.55799323
  0.16960000   0.55200679
  0.16960000   0.54609946
  0.16980000   0.70790566
  0.16980000   0.70020099
  0.16980000   0.69261447
  0.16980000   0.68514299
  0.16980000   0.67778358
  0.16980000   0.67053337
  0.16980000   0.66338964
  0.16980000   0.65634975
  0.16980000   0.64941119
  0.16980000   0.64257152
  0.16980000   0.63582843
  0.16980000   0.62917966
  0.16980000   0.62262307
  0.16980000   0.61615656
  0.16980000   0.60977815
  0.16980000   0.60348590
  0.16980000   0.59727794
  0.16980000   0.59115249
  0.16980000   0.58510779
  0.16980000   0.57914218
  0.16980000   0.57325404
  0.16980000   0.56744179
  0.16980000   0.56170392
  0.17000000   0.71863495
  0.17000000   0.71123688
  0.17000000   0.70394931
  0.17000000   0.69676935
  0.17000000   0.68969424
  0.17000000   0.68272132
  0.17000000   0.67584805
  0.17000000   0.66907198
  0.17000000   0.66239077
  0.17000000   0.65580216
  0.17000000   0.64930399
  0.17000000   0.64289416
  0.17000000   0.63657066
  0.17000000   0.63033156
  0.17000000   0.62417499
  0.17000000   0.61809915
  0.17000000   0.61210231
  0.17000000   0.60618277
  0.17000000   0.60033894
  0.17000000   0.59456922
  0.17000000   0.58887213
  0.17000000   0.58324618
  0.17000000   0.57768997
  0.17020000   0.72950547
  0.17020000   0.72242348
  0.17020000   0.71544453
  0.17020000   0.70856594
  0.17020000   0.70178516
  0.17020000   0.69509972
  0.17020000   0.68850727
  0.17020000   0.68200555
  0.17020000   0.67559237
  0.17020000   0.66926565
  0.17020000   0.66302337
  0.17020000   0.65686360
  0.17020000   0.65078446
  0.17020000   0.64478416
  0.17020000   0.63886095
  0.17020000   0.63301318
  0.17020000   0.62723921
  0.17020000   0.62153748
  0.17020000   0.61590650
  0.17020000   0.61034480
  0.17020000   0.60485097
  0.17020000   0.59942365
  0.17020000   0.59406152
  0.17040000   0.74051802
  0.17040000   0.73376166
  0.17040000   0.72710105
  0.17040000   0.72053375
  0.17040000   0.71405740
  0.17040000   0.70766972
  0.17040000   0.70136854
  0.17040000   0.69515178
  0.17040000   0.68901741
  0.17040000   0.68296351
  0.17040000   0.67698822
  0.17040000   0.67108973
  0.17040000   0.66526632
  0.17040000   0.65951633
  0.17040000   0.65383814
  0.17040000   0.64823020
  0.17040000   0.64269102
  0.17040000   0.63721914
  0.17040000   0.63181318
  0.17040000   0.62647176
  0.17040000   0.62119359
  0.17040000   0.61597741
  0.17040000   0.61082197
  0.17060000   0.75167331
  0.17060000   0.74525217
  0.17060000   0.73891971
  0.17060000   0.73267369
  0.17060000   0.72651193
  0.17060000   0.72043235
  0.17060000   0.71443297
  0.17060000   0.70851185
  0.17060000   0.70266714
  0.17060000   0.69689708
  0.17060000   0.69119993
  0.17060000   0.68557404
  0.17060000   0.68001784
  0.17060000   0.67452976
  0.17060000   0.66910834
  0.17060000   0.66375214
  0.17060000   0.65845977
  0.17060000   0.65322990
  0.17060000   0.64806123
  0.17060000   0.64295252
  0.17060000   0.63790255
  0.17060000   0.63291015
  0.17060000   0.62797418
  0.17080000   0.76297199
  0.17080000   0.75689572
  0.17080000   0.75090125
  0.17080000   0.74498653
  0.17080000   0.73914959
  0.17080000   0.73338851
  0.17080000   0.72770149
  0.17080000   0.72208676
  0.17080000   0.71654262
  0.17080000   0.71106745
  0.17080000   0.70565968
  0.17080000   0.70031779
  0.17080000   0.69504031
  0.17080000   0.68982585
  0.17080000   0.68467302
  0.17080000   0.67958052
  0.17080000   0.67454708
  0.17080000   0.66957145
  0.17080000   0.66465247
  0.17080000   0.65978896
  0.17080000   0.65497982
  0.17080000   0.65022396
  0.17080000   0.64552035
  0.17100000   0.77441465
  0.17100000   0.76869293
  0.17100000   0.76304632
  0.17100000   0.75747297
  0.17100000   0.75197109
  0.17100000   0.74653895
  0.17100000   0.74117489
  0.17100000   0.73587732
  0.17100000   0.73064470
  0.17100000   0.72547554
  0.17100000   0.72036840
  0.17100000   0.71532192
  0.17100000   0.71033475
  0.17100000   0.70540561
  0.17100000   0.70053325
  0.17100000   0.69571647
  0.17100000   0.69095410
  0.17100000   0.68624502
  0.17100000   0.68158814
  0.17100000   0.67698240
  0.17100000   0.67242678
  0.17100000   0.66792030
  0.17100000   0.66346198
  0.17120000   0.78600179
  0.17120000   0.78064431
  0.17120000   0.77535546
  0.17120000   0.77013356
  0.17120000   0.76497701
  0.17120000   0.75988424
  0.17120000   0.75485377
  0.17120000   0.74988415
  0.17120000   0.74497399
  0.17120000   0.74012195
  0.17120000   0.73532674
  0.17120000   0.73058709
  0.17120000   0.72590181
  0.17120000   0.72126973
  0.17120000   0.71668971
  0.17120000   0.71216066
  0.17120000   0.70768153
  0.17120000   0.70325128
  0.17120000   0.69886894
  0.17120000   0.69453354
  0.17120000   0.69024414
  0.17120000   0.68599985
  0.17120000   0.68179979
  0.17140000   0.79773382
  0.17140000   0.79275030
  0.17140000   0.78782910
  0.17140000   0.78296874
  0.17140000   0.77816777
  0.17140000   0.77342482
  0.17140000   0.76873854
  0.17140000   0.76410765
  0.17140000   0.75953089
  0.17140000   0.75500707
  0.17140000   0.75053502
  0.17140000   0.74611361
  0.17140000   0.74174177
  0.17140000   0.73741843
  0.17140000   0.73314259
  0.17140000   0.72891326
  0.17140000   0.72472948
  0.17140000   0.72059033
  0.17140000   0.71649491
  0.17140000   0.71244236
  0.17140000   0.70843184
  0.17140000   0.70446252
  0.17140000   0.70053362
  0.17160000   0.80961109
  0.17160000   0.80501121
  0.17160000   0.80046755
  0.17160000   0.79597878
  0.17160000   0.79154365
  0.17160000   0.78716092
  0.17160000   0.78282941
  0.17160000   0.77854797
  0.17160000   0.77431550
  0.17160000   0.77013094
  0.17160000   0.76599324
  0.17160000   0.76190141
  0.17160000   0.75785449
  0.17160000   0.75385152
  0.17160000   0.74989162
  0.17160000   0.74597389
  0.17160000   0.74209749
  0.17160000   0.73826159
  0.17160000   0.73446538
  0.17160000   0.73070810
  0.17160000   0.72698899
  0.17160000   0.72330730
  0.17160000   0.71966235
  0.17180000   0.82163382
  0.17180000   0.81742726
  0.17180000   0.81327098
  0.17180000   0.80916384
  0.17180000   0.80510473
  0.17180000   0.80109257
  0.17180000   0.79712633
  0.17180000   0.79320501
  0.17180000   0.78932765
  0.17180000   0.78549329
  0.17180000   0.78170105
  0.17180000   0.77795003
  0.17180000   0.77423939
  0.17180000   0.77056830
  0.17180000   0.76693595
  0.17180000   0.76334159
  0.17180000   0.75978444
  0.17180000   0.75626379
  0.17180000   0.75277891
  0.17180000   0.74932913
  0.17180000   0.74591378
  0.17180000   0.74253220
  0.17180000   0.73918376
  0.17200000   0.83380215
  0.17200000   0.82999854
  0.17200000   0.82623944
  0.17200000   0.82252388
  0.17200000   0.81885091
  0.17200000   0.81521959
  0.17200000   0.81162905
  0.17200000   0.80807841
  0.17200000   0.80456684
  0.17200000   0.80109353
  0.17200000   0.79765769
  0.17200000   0.79425856
  0.17200000   0.79089541
  0.17200000   0.78756751
  0.17200000   0.78427417
  0.17200000   0.78101472
  0.17200000   0.77778850
  0.17200000   0.77459487
  0.17200000   0.77143321
  0.17200000   0.76830292
  0.17200000   0.76520342
  0.17200000   0.76213413
  0.17200000   0.75909451
  0.17220000   0.84611611
  0.17220000   0.84272501
  0.17220000   0.83937282
  0.17220000   0.83605871
  0.17220000   0.83278189
  0.17220000   0.82954158
  0.17220000   0.82633702
  0.17220000   0.82316747
  0.17220000   0.82003224
  0.17220000   0.81693063
  0.17220000   0.81386198
  0.17220000   0.81082563
  0.17220000   0.80782095
  0.17220000   0.80484734
  0.17220000   0.80190421
  0.17220000   0.79899096
  0.17220000   0.79610704
  0.17220000   0.79325191
  0.17220000   0.79042504
  0.17220000   0.78762590
  0.17220000   0.78485399
  0.17220000   0.78210883
  0.17220000   0.77938994
  0.17240000   0.85857561
  0.17240000   0.85560649
  0.17240000   0.85267082
  0.17240000   0.84976794
  0.17240000   0.84689717
  0.17240000   0.84405787
  0.17240000   0.84124942
  0.17240000   0.83847121
  0.17240000   0.83572266
  0.17240000   0.83300320
  0.17240000   0.83031227
  0.17240000   0.82764933
  0.17240000   0.82501385
  0.17240000   0.82240533
  0.17240000   0.81982328
  0.17240000   0.81726719
  0.17240000   0.81473662
  0.17240000   0.81223109
  0.17240000   0.80975017
  0.17240000   0.80729342
  0.17240000   0.80486041
  0.17240000   0.80245073
  0.17240000   0.80006398
  0.17260000   0.87118042
  0.17260000   0.86864266
  0.17260000   0.86613302
  0.17260000   0.86365097
  0.17260000   0.86119597
  0.17260000   0.85876752
  0.17260000   0.85636512
  0.17260000   0.85398827
  0.17260000   0.85163651
  0.17260000   0.84930937
  0.17260000   0.84700642
  0.17260000   0.84472721
  0.17260000   0.84247132
  0.17260000   0.84023833
  0.17260000   0.83802785
  0.17260000   0.83583949
  0.17260000   0.83367285
  0.17260000   0.83152756
  0.17260000   0.82940327
  0.17260000   0.82729962
  0.17260000   0.82521626
  0.17260000   0.82315285
  0.17260000   0.82110907
  0.17280000   0.88393020
  0.17280000   0.88183303
  0.17280000   0.87975877
  0.17280000   0.87770700
  0.17280000   0.87567732
  0.17280000   0.87366934
  0.17280000   0.87168266
  0.17280000   0.86971693
  0.17280000   0.86777177
  0.17280000   0.86584682
  0.17280000   0.86394176
  0.17280000   0.86205622
  0.17280000   0.86018990
  0.17280000   0.85834246
  0.17280000   0.85651359
  0.17280000   0.85470298
  0.17280000   0.85291035
  0.17280000   0.85113538
  0.17280000   0.84937781
  0.17280000   0.84763735
  0.17280000   0.84591373
  0.17280000   0.84420668
  0.17280000   0.84251595
  0.17300000   0.89682445
  0.17300000   0.89517696
  0.17300000   0.89354724
  0.17300000   0.89193500
  0.17300000   0.89033994
  0.17300000   0.88876178
  0.17300000   0.88720024
  0.17300000   0.88565506
  0.17300000   0.88412596
  0.17300000   0.88261270
  0.17300000   0.88111502
  0.17300000   0.87963267
  0.17300000   0.87816541
  0.17300000   0.87671301
  0.17300000   0.87527524
  0.17300000   0.87385186
  0.17300000   0.87244267
  0.17300000   0.87104745
  0.17300000   0.86966598
  0.17300000   0.86829806
  0.17300000   0.86694349
  0.17300000   0.86560206
  0.17300000   0.86427360
  0.17320000   0.90986254
  0.17320000   0.90867362
  0.17320000   0.90749740
  0.17320000   0.90633367
  0.17320000   0.90518227
  0.17320000   0.90404299
  0.17320000   0.90291566
  0.17320000   0.90180010
  0.17320000   0.90069614
  0.17320000   0.89960360
  0.17320000   0.89852233
  0.17320000   0.89745215
  0.17320000   0.89639291
  0.17320000   0.89534445
  0.17320000   0.89430661
  0.17320000   0.89327926
  0.17320000   0.89226223
  0.17320000   0.89125538
  0.17320000   0.89025858
  0.17320000   0.88927168
  0.17320000   0.88829455
  0.17320000   0.88732705
  0.17320000   0.88636905
  0.17340000   0.92304366
  0.17340000   0.92232199
  0.17340000   0.92160796
  0.17340000   0.92090148
  0.17340000   0.92020245
  0.17340000   0.91951076
  0.17340000   0.91882632
  0.17340000   0.91814903
  0.17340000   0.91747880
  0.17340000   0.91681553
  0.17340000   0.91615914
  0.17340000   0.91550952
  0.17340000   0.91486660
  0.17340000   0.91423029
  0.17340000   0.91360051
  0.17340000   0.91297716
  0.17340000   0.91236017
  0.17340000   0.91174945
  0.17340000   0.91114493
  0.17340000   0.91054654
  0.17340000   0.90995418
  0.17340000   0.90936779
  0.17340000   0.90878729
  0.17360000   0.93636683
  0.17360000   0.93612083
  0.17360000   0.93587743
  0.17360000   0.93563659
  0.17360000   0.93539830
  0.17360000   0.93516251
  0.17360000   0.93492921
  0.17360000   0.93469835
  0.17360000   0.93446991
  0.17360000   0.93424387
  0.17360000   0.93402020
  0.17360000   0.93379886
  0.17360000   0.93357983
  0.17360000   0.93336309
  0.17360000   0.93314861
  0.17360000   0.93293637
  0.17360000   0.93272633
  0.17360000   0.93251847
  0.17360000   0.93231277
  0.17360000   0.93210921
  0.17360000   0.93190775
  0.17360000   0.93170839
  0.17360000   0.93151108
  0.17380000   0.94983090
  0.17380000   0.95006871
  0.17380000   0.95030404
  0.17380000   0.95053688
  0.17380000   0.95076728
  0.17380000   0.95099525
  0.17380000   0.95122082
  0.17380000   0.95144401
  0.17380000   0.95166483
  0.17380000   0.95188332
  0.17380000   0.95209949
  0.17380000   0.95231337
  0.17380000   0.95252498
  0.17380000   0.95273433
  0.17380000   0.95294146
  0.17380000   0.95314639
  0.17380000   0.95334913
  0.17380000   0.95354970
  0.17380000   0.95374814
  0.17380000   0.95394445
  0.17380000   0.95413866
  0.17380000   0.95433079
  0.17380000   0.95452086
  0.17400000   0.96343450
  0.17400000   0.96416396
  0.17400000   0.96488575
  0.17400000   0.96559990
  0.17400000   0.96630649
  0.17400000   0.96700557
  0.17400000   0.96769718
  0.17400000   0.96838140
  0.17400000   0.96905827
  0.17400000   0.96972785
  0.17400000   0.97039019
  0.17400000   0.97104536
  0.17400000   0.97169340
  0.17400000   0.97233438
  0.17400000   0.97296835
  0.17400000   0.97359537
  0.17400000   0.97421549
  0.17400000   0.97482878
  0.17400000   0.97543528
  0.17400000   0.97603506
  0.17400000   0.97662816
  0.17400000   0.97721466
  0.17400000   0.97779459
  0.17420000   0.97717610
  0.17420000   0.97840466
  0.17420000   0.97962023
  0.17420000   0.98082287
  0.17420000   0.98201263
  0.17420000   0.98318958
  0.17420000   0.98435380
  0.17420000   0.98550533
  0.17420000   0.98664427
  0.17420000   0.98777067
  0.17420000   0.98888462
  0.17420000   0.98998617
  0.17420000   0.99107541
  0.17420000   0.99215241
  0.17420000   0.99321725
  0.17420000   0.99427001
  0.17420000   0.99531076
  0.17420000   0.99633959
  0.17420000   0.99735657
  0.17420000   0.99836178
  0.17420000   0.99935531
  0.17420000   1.00033725
  0.17420000   1.00130766
  0.17440000   0.99105390
  0.17440000   0.99278864
  0.17440000   0.99450487
  0.17440000   0.99620263
  0.17440000   0.99788198
  0.17440000   0.99954295
  0.17440000   1.00118559
  0.17440000   1.00280998
  0.17440000   1.00441616
  0.17440000   1.00600420
  0.17440000   1.00757417
  0.17440000   1.00912614
  0.17440000   1.01066017
  0.17440000   1.01217635
  0.17440000   1.01367476
  0.17440000   1.01515548
  0.17440000   1.01661860
  0.17440000   1.01806420
  0.17440000   1.01949237
  0.17440000   1.02090322
  0.17440000   1.02229683
  0.17440000   1.02367331
  0.17440000   1.02503276
  0.17460000   1.00506591
  0.17460000   1.00731344
  0.17460000   1.00953670
  0.17460000   1.01173568
  0.17460000   1.01391037
  0.17460000   1.01606079
  0.17460000   1.01818694
  0.17460000   1.02028883
  0.17460000   1.02236650
  0.17460000   1.02441998
  0.17460000   1.02644930
  0.17460000   1.02845451
  0.17460000   1.03043566
  0.17460000   1.03239280
  0.17460000   1.03432602
  0.17460000   1.03623536
  0.17460000   1.03812092
  0.17460000   1.03998278
  0.17460000   1.04182102
  0.17460000   1.04363574
  0.17460000   1.04542704
  0.17460000   1.04719502
  0.17460000   1.04893980
  0.17480000   1.01920988
  0.17480000   1.02197632
  0.17480000   1.02471242
  0.17480000   1.02741807
  0.17480000   1.03009319
  0.17480000   1.03273771
  0.17480000   1.03535156
  0.17480000   1.03793469
  0.17480000   1.04048706
  0.17480000   1.04300865
  0.17480000   1.04549943
  0.17480000   1.04795940
  0.17480000   1.05038858
  0.17480000   1.05278698
  0.17480000   1.05515462
  0.17480000   1.05749156
  0.17480000   1.05979784
  0.17480000   1.06207352
  0.17480000   1.06431868
  0.17480000   1.06653339
  0.17480000   1.06871776
  0.17480000   1.07087189
  0.17480000   1.07299588
  0.17500000   1.03348329
  0.17500000   1.03677423
  0.17500000   1.04002836
  0.17500000   1.04324546
  0.17500000   1.04642531
  0.17500000   1.04956773
  0.17500000   1.05267254
  0.17500000   1.05573960
  0.17500000   1.05876875
  0.17500000   1.06175989
  0.17500000   1.06471293
  0.17500000   1.06762777
  0.17500000   1.07050435
  0.17500000   1.07334264
  0.17500000   1.07614261
  0.17500000   1.07890425
  0.17500000   1.08162756
  0.17500000   1.08431257
  0.17500000   1.08695933
  0.17500000   1.08956789
  0.17500000   1.09213833
  0.17500000   1.09467074
  0.17500000   1.09716524
  0.17520000   1.04788338
  0.17520000   1.05170381
  0.17520000   1.05548050
  0.17520000   1.05921305
  0.17520000   1.06290109
  0.17520000   1.06654427
  0.17520000   1.07014228
  0.17520000   1.07369481
  0.17520000   1.07720160
  0.17520000   1.08066242
  0.17520000   1.08407705
  0.17520000   1.08744530
  0.17520000   1.09076702
  0.17520000   1.09404208
  0.17520000   1.09727037
  0.17520000   1.10045182
  0.17520000   1.10358637
  0.17520000   1.10667400
  0.17520000   1.10971472
  0.17520000   1.11270854
  0.17520000   1.11565552
  0.17520000   1.11855573
  0.17520000   1.12140928
  0.17540000   1.06240708
  0.17540000   1.06676133
  0.17540000   1.07106436
  0.17540000   1.07531556
  0.17540000   1.07951433
  0.17540000   1.08366012
  0.17540000   1.08775243
  0.17540000   1.09179077
  0.17540000   1.09577473
  0.17540000   1.09970388
  0.17540000   1.10357789
  0.17540000   1.10739643
  0.17540000   1.11115922
  0.17540000   1.11486601
  0.17540000   1.11851661
  0.17540000   1.12211085
  0.17540000   1.12564861
  0.17540000   1.12912979
  0.17540000   1.13255434
  0.17540000   1.13592227
  0.17540000   1.13923358
  0.17540000   1.14248834
  0.17540000   1.14568665
  0.17560000   1.07705101
  0.17560000   1.08194273
  0.17560000   1.08677509
  0.17560000   1.09154722
  0.17560000   1.09625826
  0.17560000   1.10090740
  0.17560000   1.10549391
  0.17560000   1.11001708
  0.17560000   1.11447626
  0.17560000   1.11887087
  0.17560000   1.12320036
  0.17560000   1.12746426
  0.17560000   1.13166213
  0.17560000   1.13579359
  0.17560000   1.13985833
  0.17560000   1.14385607
  0.17560000   1.14778661
  0.17560000   1.15164978
  0.17560000   1.15544548
  0.17560000   1.15917366
  0.17560000   1.16283433
  0.17560000   1.16642752
  0.17560000   1.16995334
  0.17580000   1.09181151
  0.17580000   1.09724354
  0.17580000   1.10260737
  0.17580000   1.10790175
  0.17580000   1.11312551
  0.17580000   1.11827756
  0.17580000   1.12335684
  0.17580000   1.12836241
  0.17580000   1.13329335
  0.17580000   1.13814884
  0.17580000   1.14292813
  0.17580000   1.14763054
  0.17580000   1.15225546
  0.17580000   1.15680236
  0.17580000   1.16127079
  0.17580000   1.16566035
  0.17580000   1.16997076
  0.17580000   1.17420177
  0.17580000   1.17835322
  0.17580000   1.18242504
  0.17580000   1.18641721
  0.17580000   1.19032979
  0.17580000   1.19416291
  0.17600000   1.10668454
  0.17600000   1.11265893
  0.17600000   1.11855539
  0.17600000   1.12437230
  0.17600000   1.13010808
  0.17600000   1.13576129
  0.17600000   1.14133054
  0.17600000   1.14681454
  0.17600000   1.15221210
  0.17600000   1.15752212
  0.17600000   1.16274360
  0.17600000   1.16787564
  0.17600000   1.17291742
  0.17600000   1.17786826
  0.17600000   1.18272753
  0.17600000   1.18749476
  0.17600000   1.19216952
  0.17600000   1.19675153
  0.17600000   1.20124058
  0.17600000   1.20563658
  0.17600000   1.20993952
  0.17600000   1.21414950
  0.17600000   1.21826671
  0.17620000   1.12166574
  0.17620000   1.12818363
  0.17620000   1.13461290
  0.17620000   1.14095147
  0.17620000   1.14719732
  0.17620000   1.15334857
  0.17620000   1.15940344
  0.17620000   1.16536029
  0.17620000   1.17121756
  0.17620000   1.17697387
  0.17620000   1.18262791
  0.17620000   1.18817854
  0.17620000   1.19362474
  0.17620000   1.19896562
  0.17620000   1.20420043
  0.17620000   1.20932855
  0.17620000   1.21434950
  0.17620000   1.21926293
  0.17620000   1.22406862
  0.17620000   1.22876650
  0.17620000   1.23335659
  0.17620000   1.23783908
  0.17620000   1.24221426
  0.17640000   1.13675038
  0.17640000   1.14381193
  0.17640000   1.15077311
  0.17640000   1.15763126
  0.17640000   1.16438388
  0.17640000   1.17102858
  0.17640000   1.17756315
  0.17640000   1.18398550
  0.17640000   1.19029371
  0.17640000   1.19648604
  0.17640000   1.20256088
  0.17640000   1.20851683
  0.17640000   1.21435263
  0.17640000   1.22006721
  0.17640000   1.22565968
  0.17640000   1.23112932
  0.17640000   1.23647558
  0.17640000   1.24169809
  0.17640000   1.24679667
  0.17640000   1.25177129
  0.17640000   1.25662210
  0.17640000   1.26134941
  0.17640000   1.26595369
  0.17660000   1.15193333
  0.17660000   1.15953769
  0.17660000   1.16702869
  0.17660000   1.17440307
  0.17660000   1.18165772
  0.17660000   1.18878972
  0.17660000   1.19579634
  0.17660000   1.20267501
  0.17660000   1.20942342
  0.17660000   1.21603941
  0.17660000   1.22252108
  0.17660000   1.22886673
  0.17660000   1.23507489
  0.17660000   1.24114430
  0.17660000   1.24707395
  0.17660000   1.25286305
  0.17660000   1.25851104
  0.17660000   1.26401758
  0.17660000   1.26938255
  0.17660000   1.27460608
  0.17660000   1.27968847
  0.17660000   1.28463027
  0.17660000   1.28943222
  0.17680000   1.16720910
  0.17680000   1.17535428
  0.17680000   1.18337179
  0.17680000   1.19125765
  0.17680000   1.19900809
  0.17680000   1.20661957
  0.17680000   1.21408878
  0.17680000   1.22141268
  0.17680000   1.22858845
  0.17680000   1.23561358
  0.17680000   1.24248580
  0.17680000   1.24920314
  0.17680000   1.25576391
  0.17680000   1.26216672
  0.17680000   1.26841047
  0.17680000   1.27449433
  0.17680000   1.28041780
  0.17680000   1.28618064
  0.17680000   1.29178290
  0.17680000   1.29722491
  0.17680000   1.30250727
  0.17680000   1.30763085
  0.17680000   1.31259677
  0.17700000   1.18257174
  0.17700000   1.19125460
  0.17700000   1.19979398
  0.17700000   1.20818510
  0.17700000   1.21642346
  0.17700000   1.22450485
  0.17700000   1.23242534
  0.17700000   1.24018132
  0.17700000   1.24776951
  0.17700000   1.25518696
  0.17700000   1.26243108
  0.17700000   1.26949965
  0.17700000   1.27639079
  0.17700000   1.28310301
  0.17700000   1.28963516
  0.17700000   1.29598651
  0.17700000   1.30215664
  0.17700000   1.30814554
  0.17700000   1.31395352
  0.17700000   1.31958126
  0.17700000   1.32502976
  0.17700000   1.33030034
  0.17700000   1.33539465
  0.17720000   1.19801490
  0.17720000   1.20723103
  0.17720000   1.21628622
  0.17720000   1.22517485
  0.17720000   1.23389159
  0.17720000   1.24243148
  0.17720000   1.25078993
  0.17720000   1.25896276
  0.17720000   1.26694617
  0.17720000   1.27473683
  0.17720000   1.28233182
  0.17720000   1.28972869
  0.17720000   1.29692544
  0.17720000   1.30392053
  0.17720000   1.31071291
  0.17720000   1.31730196
  0.17720000   1.32368753
  0.17720000   1.32986993
  0.17720000   1.33584987
  0.17720000   1.34162853
  0.17720000   1.34720746
  0.17720000   1.35258862
  0.17720000   1.35777432
  0.17740000   1.21353177
  0.17740000   1.22327541
  0.17740000   1.23283891
  0.17740000   1.24221564
  0.17740000   1.25139942
  0.17740000   1.26038449
  0.17740000   1.26916556
  0.17740000   1.27773783
  0.17740000   1.28609702
  0.17740000   1.29423941
  0.17740000   1.30216180
  0.17740000   1.30986159
  0.17740000   1.31733672
  0.17740000   1.32458573
  0.17740000   1.33160772
  0.17740000   1.33840239
  0.17740000   1.34496996
  0.17740000   1.35131123
  0.17740000   1.35742749
  0.17740000   1.36332059
  0.17740000   1.36899281
  0.17740000   1.37444693
  0.17740000   1.37968612
  0.17760000   1.22911508
  0.17760000   1.23937909
  0.17760000   1.24944179
  0.17760000   1.25929553
  0.17760000   1.26893317
  0.17760000   1.27834810
  0.17760000   1.28753430
  0.17760000   1.29648639
  0.17760000   1.30519961
  0.17760000   1.31366989
  0.17760000   1.32189382
  0.17760000   1.32986873
  0.17760000   1.33759263
  0.17760000   1.34506427
  0.17760000   1.35228307
  0.17760000   1.35924916
  0.17760000   1.36596337
  0.17760000   1.37242715
  0.17760000   1.37864259
  0.17760000   1.38461240
  0.17760000   1.39033984
  0.17760000   1.39582867
  0.17760000   1.40108316
  0.17780000   1.24475709
  0.17780000   1.25553283
  0.17780000   1.26608401
  0.17780000   1.27640187
  0.17780000   1.28647824
  0.17780000   1.29630566
  0.17780000   1.30587737
  0.17780000   1.31518741
  0.17780000   1.32423058
  0.17780000   1.33300255
  0.17780000   1.34149981
  0.17780000   1.34971973
  0.17780000   1.35766056
  0.17780000   1.36532138
  0.17780000   1.37270216
  0.17780000   1.37980369
  0.17780000   1.38662757
  0.17780000   1.39317617
  0.17780000   1.39945261
  0.17780000   1.40546069
  0.17780000   1.41120485
  0.17780000   1.41669013
  0.17780000   1.42192209
  0.17800000   1.26044957
  0.17800000   1.27172684
  0.17800000   1.28275408
  0.17800000   1.29352129
  0.17800000   1.30401930
  0.17800000   1.31423973
  0.17800000   1.32417512
  0.17800000   1.33381896
  0.17800000   1.34316572
  0.17800000   1.35221088
  0.17800000   1.36095099
  0.17800000   1.36938363
  0.17800000   1.37750745
  0.17800000   1.38532213
  0.17800000   1.39282837
  0.17800000   1.40002787
  0.17800000   1.40692328
  0.17800000   1.41351814
  0.17800000   1.41981685
  0.17800000   1.42582457
  0.17800000   1.43154720
  0.17800000   1.43699127
  0.17800000   1.44216386
  0.17820000   1.27618379
  0.17820000   1.28795078
  0.17820000   1.29943985
  0.17820000   1.31063976
  0.17820000   1.32154024
  0.17820000   1.33213207
  0.17820000   1.34240710
  0.17820000   1.35235835
  0.17820000   1.36198006
  0.17820000   1.37126772
  0.17820000   1.38021807
  0.17820000   1.38882913
  0.17820000   1.39710019
  0.17820000   1.40503175
  0.17820000   1.41262557
  0.17820000   1.41988452
  0.17820000   1.42681259
  0.17820000   1.43341478
  0.17820000   1.43969706
  0.17820000   1.44566625
  0.17820000   1.45132994
  0.17820000   1.45669640
  0.17820000   1.46177448
  0.17840000   1.29195054
  0.17840000   1.30419372
  0.17840000   1.31612855
  0.17840000   1.32774251
  0.17840000   1.33902426
  0.17840000   1.34996371
  0.17840000   1.36055212
  0.17840000   1.37078219
  0.17840000   1.38064807
  0.17840000   1.39014543
  0.17840000   1.39927145
  0.17840000   1.40802485
  0.17840000   1.41640583
  0.17840000   1.42441607
  0.17840000   1.43205862
  0.17840000   1.43933790
  0.17840000   1.44625954
  0.17840000   1.45283034
  0.17840000   1.45905812
  0.17840000   1.46495164
  0.17840000   1.47052046
  0.17840000   1.47577484
  0.17840000   1.48072559
  0.17860000   1.30774005
  0.17860000   1.32044415
  0.17860000   1.33280680
  0.17860000   1.34481416
  0.17860000   1.35645383
  0.17860000   1.36771497
  0.17860000   1.37858836
  0.17860000   1.38906651
  0.17860000   1.39914371
  0.17860000   1.40881605
  0.17860000   1.41808146
  0.17860000   1.42693963
  0.17860000   1.43539203
  0.17860000   1.44344183
  0.17860000   1.45109379
  0.17860000   1.45835418
  0.17860000   1.46523064
  0.17860000   1.47173208
  0.17860000   1.47786852
  0.17860000   1.48365092
  0.17860000   1.48909106
  0.17860000   1.49420141
  0.17860000   1.49899493
  0.17880000   1.32354209
  0.17880000   1.33669001
  0.17880000   1.34946057
  0.17880000   1.36183863
  0.17880000   1.37381080
  0.17880000   1.38536558
  0.17880000   1.39649342
  0.17880000   1.40718690
  0.17880000   1.41744068
  0.17880000   1.42725160
  0.17880000   1.43661863
  0.17880000   1.44554284
  0.17880000   1.45402734
  0.17880000   1.46207719
  0.17880000   1.46969921
  0.17880000   1.47690194
  0.17880000   1.48369538
  0.17880000   1.49009090
  0.17880000   1.49610097
  0.17880000   1.50173907
  0.17880000   1.50701942
  0.17880000   1.51195687
  0.17880000   1.51656666
  0.17900000   1.33934586
  0.17900000   1.35291866
  0.17900000   1.36607526
  0.17900000   1.37879927
  0.17900000   1.39107643
  0.17900000   1.40289470
  0.17900000   1.41424449
  0.17900000   1.42511866
  0.17900000   1.43551260
  0.17900000   1.44542423
  0.17900000   1.45485399
  0.17900000   1.46380474
  0.17900000   1.47228165
  0.17900000   1.48029207
  0.17900000   1.48784535
  0.17900000   1.49495265
  0.17900000   1.50162672
  0.17900000   1.50788168
  0.17900000   1.51373280
  0.17900000   1.51919625
  0.17900000   1.52428890
  0.17900000   1.52902811
  0.17900000   1.53343151
  0.17920000   1.35514010
  0.17920000   1.36911691
  0.17920000   1.38263569
  0.17920000   1.39567887
  0.17920000   1.40823143
  0.17920000   1.42028110
  0.17920000   1.43181844
  0.17920000   1.44283697
  0.17920000   1.45333319
  0.17920000   1.46330655
  0.17920000   1.47275939
  0.17920000   1.48169681
  0.17920000   1.49012652
  0.17920000   1.49805864
  0.17920000   1.50550544
  0.17920000   1.51248112
  0.17920000   1.51900151
  0.17920000   1.52508381
  0.17920000   1.53074630
  0.17920000   1.53600805
  0.17920000   1.54088873
  0.17920000   1.54540827
  0.17920000   1.54958673
  0.17940000   1.37091301
  0.17940000   1.38527106
  0.17940000   1.39912615
  0.17940000   1.41245968
  0.17940000   1.42525612
  0.17940000   1.43750319
  0.17940000   1.44919199
  0.17940000   1.46031710
  0.17940000   1.47087658
  0.17940000   1.48087189
  0.17940000   1.49030778
  0.17940000   1.49919211
  0.17940000   1.50753563
  0.17940000   1.51535167
  0.17940000   1.52265587
  0.17940000   1.52946585
  0.17940000   1.53580085
  0.17940000   1.54168138
  0.17940000   1.54712895
  0.17940000   1.55216568
  0.17940000   1.55681406
  0.17940000   1.56109664
  0.17940000   1.56503586
  0.17960000   1.38665231
  0.17960000   1.40136687
  0.17960000   1.41553044
  0.17960000   1.42912356
  0.17960000   1.44213046
  0.17960000   1.45453921
  0.17960000   1.46634189
  0.17960000   1.47753461
  0.17960000   1.48811750
  0.17960000   1.49809459
  0.17960000   1.50747359
  0.17960000   1.51626567
  0.17960000   1.52448510
  0.17960000   1.53214893
  0.17960000   1.53927657
  0.17960000   1.54588939
  0.17960000   1.55201032
  0.17960000   1.55766343
  0.17960000   1.56287354
  0.17960000   1.56766589
  0.17960000   1.57206580
  0.17960000   1.57609839
  0.17960000   1.57978833
  0.17980000   1.40234525
  0.17980000   1.41738967
  0.17980000   1.43183192
  0.17980000   1.44565199
  0.17980000   1.45883418
  0.17980000   1.47136737
  0.17980000   1.48324509
  0.17980000   1.49446556
  0.17980000   1.50503158
  0.17980000   1.51495031
  0.17980000   1.52423303
  0.17980000   1.53289477
  0.17980000   1.54095385
  0.17980000   1.54843149
  0.17980000   1.55535124
  0.17980000   1.56173854
  0.17980000   1.56762021
  0.17980000   1.57302399
  0.17980000   1.57797810
  0.17980000   1.58251087
  0.17980000   1.58665038
  0.17980000   1.59042416
  0.17980000   1.59385896
  0.18000000   1.41797863
  0.18000000   1.43332433
  0.18000000   1.44801361
  0.18000000   1.46202618
  0.18000000   1.47534692
  0.18000000   1.48796598
  0.18000000   1.49987897
  0.18000000   1.51108680
  0.18000000   1.52159559
  0.18000000   1.53141630
  0.18000000   1.54056439
  0.18000000   1.54905930
  0.18000000   1.55692392
  0.18000000   1.56418401
  0.18000000   1.57086764
  0.18000000   1.57700451
  0.18000000   1.58262549
  0.18000000   1.58776205
  0.18000000   1.59244576
  0.18000000   1.59670795
  0.18000000   1.60057930
  0.18000000   1.60408954
  0.18000000   1.60726730
  0.18020000   1.43353884
  0.18020000   1.44915536
  0.18020000   1.46405819
  0.18020000   1.47822721
  0.18020000   1.49164835
  0.18020000   1.50431369
  0.18020000   1.51622151
  0.18020000   1.52737616
  0.18020000   1.53778776
  0.18020000   1.54747174
  0.18020000   1.55644836
  0.18020000   1.56474202
  0.18020000   1.57238064
  0.18020000   1.57939492
  0.18020000   1.58581763
  0.18020000   1.59168294
  0.18020000   1.59702580
  0.18020000   1.60188136
  0.18020000   1.60628445
  0.18020000   1.61026919
  0.18020000   1.61386863
  0.18020000   1.61711447
  0.18020000   1.62003686
  0.18040000   1.44901187
  0.18040000   1.46486695
  0.18040000   1.47994816
  0.18040000   1.49423610
  0.18040000   1.50771835
  0.18040000   1.52038959
  0.18040000   1.53225155
  0.18040000   1.54331274
  0.18040000   1.55358801
  0.18040000   1.56309797
  0.18040000   1.57186826
  0.18040000   1.57992880
  0.18040000   1.58731292
  0.18040000   1.59405651
  0.18040000   1.60019727
  0.18040000   1.60577386
  0.18040000   1.61082526
  0.18040000   1.61539018
  0.18040000   1.61950649
  0.18040000   1.62321087
  0.18040000   1.62653842
  0.18040000   1.62952248
  0.18040000   1.63219443
  0.18060000   1.46438340
  0.18060000   1.48044302
  0.18060000   1.49566591
  0.18060000   1.51003397
  0.18060000   1.52353714
  0.18060000   1.53617349
  0.18060000   1.54794898
  0.18060000   1.55887711
  0.18060000   1.56897821
  0.18060000   1.57827873
  0.18060000   1.58681031
  0.18060000   1.59460879
  0.18060000   1.60171326
  0.18060000   1.60816502
  0.18060000   1.61400673
  0.18060000   1.61928149
  0.18060000   1.62403220
  0.18060000   1.62830087
  0.18060000   1.63212815
  0.18060000   1.63555291
  0.18060000   1.63861200
  0.18060000   1.64134002
  0.18060000   1.64376921
  0.18080000   1.47963879
  0.18080000   1.49586733
  0.18080000   1.51119382
  0.18080000   1.52560216
  0.18080000   1.53908548
  0.18080000   1.55164606
  0.18080000   1.56329501
  0.18080000   1.57405159
  0.18080000   1.58394241
  0.18080000   1.59300041
  0.18080000   1.60126372
  0.18080000   1.60877452
  0.18080000   1.61557786
  0.18080000   1.62172054
  0.18080000   1.62725013
  0.18080000   1.63221404
  0.18080000   1.63665881
  0.18080000   1.64062947
  0.18080000   1.64416905
  0.18080000   1.64731829
  0.18080000   1.65011534
  0.18080000   1.65259569
  0.18080000   1.65479211
  0.18100000   1.49476322
  0.18100000   1.51112357
  0.18100000   1.52651439
  0.18100000   1.54092241
  0.18100000   1.55434483
  0.18100000   1.56678910
  0.18100000   1.57827234
  0.18100000   1.58882045
  0.18100000   1.59846706
  0.18100000   1.60725217
  0.18100000   1.61522088
  0.18100000   1.62242196
  0.18100000   1.62890653
  0.18100000   1.63472688
  0.18100000   1.63993532
  0.18100000   1.64458331
  0.18100000   1.64872070
  0.18100000   1.65239513
  0.18100000   1.65565163
  0.18100000   1.65853233
  0.18100000   1.66107633
  0.18100000   1.66331959
  0.18100000   1.66529501
  0.18120000   1.50974167
  0.18120000   1.52619541
  0.18120000   1.54161035
  0.18120000   1.55597697
  0.18120000   1.56929754
  0.18120000   1.58158564
  0.18120000   1.59286537
  0.18120000   1.60317010
  0.18120000   1.61254113
  0.18120000   1.62102610
  0.18120000   1.62867737
  0.18120000   1.63555047
  0.18120000   1.64170261
  0.18120000   1.64719137
  0.18120000   1.65207357
  0.18120000   1.65640434
  0.18120000   1.66023641
  0.18120000   1.66361960
  0.18120000   1.66660048
  0.18120000   1.66922214
  0.18120000   1.67152415
  0.18120000   1.67354260
  0.18120000   1.67531016
  0.18140000   1.52455909
  0.18140000   1.54106667
  0.18140000   1.55646482
  0.18140000   1.57074881
  0.18140000   1.58392702
  0.18140000   1.59602024
  0.18140000   1.60706042
  0.18140000   1.61708924
  0.18140000   1.62615629
  0.18140000   1.63431723
  0.18140000   1.64163194
  0.18140000   1.64816273
  0.18140000   1.65397274
  0.18140000   1.65912459
  0.18140000   1.66367920
  0.18140000   1.66769493
  0.18140000   1.67122693
  0.18140000   1.67432669
  0.18140000   1.67704182
  0.18140000   1.67941593
  0.18140000   1.68148866
  0.18140000   1.68329583
  0.18140000   1.68486957
  0.18160000   1.53920039
  0.18160000   1.55572135
  0.18160000   1.57106141
  0.18160000   1.58522174
  0.18160000   1.59821796
  0.18160000   1.61007907
  0.18160000   1.62084587
  0.18160000   1.63056902
  0.18160000   1.63930693
  0.18160000   1.64712361
  0.18160000   1.65408649
  0.18160000   1.66026457
  0.18160000   1.66572665
  0.18160000   1.67053999
  0.18160000   1.67476915
  0.18160000   1.67847519
  0.18160000   1.68171514
  0.18160000   1.68454166
  0.18160000   1.68700289
  0.18160000   1.68914251
  0.18160000   1.69099985
  0.18160000   1.69261010
  0.18160000   1.69400456
  0.18180000   1.55365061
  0.18180000   1.57014385
  0.18180000   1.58538442
  0.18180000   1.59938060
  0.18180000   1.61215642
  0.18180000   1.62375016
  0.18180000   1.63421228
  0.18180000   1.64360309
  0.18180000   1.65199023
  0.18180000   1.65944617
  0.18180000   1.66604587
  0.18180000   1.67186473
  0.18180000   1.67697684
  0.18180000   1.68145356
  0.18180000   1.68536257
  0.18180000   1.68876705
  0.18180000   1.69172534
  0.18180000   1.69429073
  0.18180000   1.69651144
  0.18180000   1.69843078
  0.18180000   1.70008738
  0.18180000   1.70151551
  0.18180000   1.70274539
  0.18200000   1.56789497
  0.18200000   1.58431900
  0.18200000   1.59941893
  0.18200000   1.61321141
  0.18200000   1.62573007
  0.18200000   1.63702346
  0.18200000   1.64715251
  0.18200000   1.65618769
  0.18200000   1.66420611
  0.18200000   1.67128870
  0.18200000   1.67751774
  0.18200000   1.68297462
  0.18200000   1.68773820
  0.18200000   1.69188340
  0.18200000   1.69548033
  0.18200000   1.69859374
  0.18200000   1.70128270
  0.18200000   1.70360059
  0.18200000   1.70559526
  0.18200000   1.70730925
  0.18200000   1.70878018
  0.18200000   1.71004110
  0.18200000   1.71112097
  0.18220000   1.58191901
  0.18220000   1.59823225
  0.18220000   1.61315097
  0.18220000   1.62670152
  0.18220000   1.63892826
  0.18220000   1.64989098
  0.18220000   1.65966175
  0.18220000   1.66832159
  0.18220000   1.67595714
  0.18220000   1.68265765
  0.18220000   1.68851230
  0.18220000   1.69360800
  0.18220000   1.69802772
  0.18220000   1.70184929
  0.18220000   1.70514464
  0.18220000   1.70797941
  0.18220000   1.71041286
  0.18220000   1.71249798
  0.18220000   1.71428179
  0.18220000   1.71580573
  0.18220000   1.71710611
  0.18220000   1.71821458
  0.18220000   1.71915862
  0.18240000   1.59570866
  0.18240000   1.61186977
  0.18240000   1.62656768
  0.18240000   1.63983973
  0.18240000   1.65174218
  0.18240000   1.66234689
  0.18240000   1.67173761
  0.18240000   1.68000609
  0.18240000   1.68724845
  0.18240000   1.69356192
  0.18240000   1.69904204
  0.18240000   1.70378061
  0.18240000   1.70786402
  0.18240000   1.71137231
  0.18240000   1.71437854
  0.18240000   1.71694864
  0.18240000   1.71914151
  0.18240000   1.72100928
  0.18240000   1.72259777
  0.18240000   1.72394702
  0.18240000   1.72509178
  0.18240000   1.72606212
  0.18240000   1.72688396
  0.18260000   1.60925037
  0.18260000   1.62521859
  0.18260000   1.63965738
  0.18260000   1.65261643
  0.18260000   1.66416492
  0.18260000   1.67438753
  0.18260000   1.68338002
  0.18260000   1.69124493
  0.18260000   1.69808757
  0.18260000   1.70401264
  0.18260000   1.70912144
  0.18260000   1.71350988
  0.18260000   1.71726705
  0.18260000   1.72047443
  0.18260000   1.72320556
  0.18260000   1.72552608
  0.18260000   1.72749401
  0.18260000   1.72916020
  0.18260000   1.73056897
  0.18260000   1.73175865
  0.18260000   1.73276231
  0.18260000   1.73360828
  0.18260000   1.73432081
  0.18280000   1.62253125
  0.18280000   1.63826672
  0.18280000   1.65240977
  0.18280000   1.66502369
  0.18280000   1.67619156
  0.18280000   1.68601140
  0.18280000   1.69459120
  0.18280000   1.70204410
  0.18280000   1.70848416
  0.18280000   1.71402290
  0.18280000   1.71876662
  0.18280000   1.72281453
  0.18280000   1.72625762
  0.18280000   1.72917810
  0.18280000   1.73164934
  0.18280000   1.73373612
  0.18280000   1.73549511
  0.18280000   1.73697556
  0.18280000   1.73821996
  0.18280000   1.73926480
  0.18280000   1.74014125
  0.18280000   1.74087587
  0.18280000   1.74149119
  0.18300000   1.63553914
  0.18300000   1.65100326
  0.18300000   1.66481598
  0.18300000   1.67705536
  0.18300000   1.68781918
  0.18300000   1.69721920
  0.18300000   1.70537560
  0.18300000   1.71241175
  0.18300000   1.71844985
  0.18300000   1.72360747
  0.18300000   1.72799504
  0.18300000   1.73171423
  0.18300000   1.73485713
  0.18300000   1.73750597
  0.18300000   1.73973332
  0.18300000   1.74160258
  0.18300000   1.74316873
  0.18300000   1.74447905
  0.18300000   1.74557403
  0.18300000   1.74648812
  0.18300000   1.74725055
  0.18300000   1.74788601
  0.18300000   1.74841532
  0.18320000   1.64826274
  0.18320000   1.66341853
  0.18320000   1.67686866
  0.18320000   1.68870708
  0.18320000   1.69904687
  0.18320000   1.70801371
  0.18320000   1.71573971
  0.18320000   1.72235794
  0.18320000   1.72799795
  0.18320000   1.73278247
  0.18320000   1.73682516
  0.18320000   1.74022928
  0.18320000   1.74308722
  0.18320000   1.74548054
  0.18320000   1.74748044
  0.18320000   1.74914854
  0.18320000   1.75053772
  0.18320000   1.75169311
  0.18320000   1.75265299
  0.18320000   1.75344970
  0.18320000   1.75411045
  0.18320000   1.75465808
  0.18320000   1.75511169
  0.18340000   1.66069173
  0.18340000   1.67550413
  0.18340000   1.68856209
  0.18340000   1.69997635
  0.18340000   1.70987570
  0.18340000   1.71839969
  0.18340000   1.72569192
  0.18340000   1.73189441
  0.18340000   1.73714317
  0.18340000   1.74156511
  0.18340000   1.74527615
  0.18340000   1.74838029
  0.18340000   1.75096945
  0.18340000   1.75312389
  0.18340000   1.75491295
  0.18340000   1.75639607
  0.18340000   1.75762378
  0.18340000   1.75863884
  0.18340000   1.75947722
  0.18340000   1.76016909
  0.18340000   1.76073963
  0.18340000   1.76120983
  0.18340000   1.76159713
  0.18360000   1.67281684
  0.18360000   1.68725307
  0.18360000   1.69989221
  0.18360000   1.71086250
  0.18360000   1.72030866
  0.18360000   1.72838379
  0.18360000   1.73524235
  0.18360000   1.74103439
  0.18360000   1.74590136
  0.18360000   1.74997335
  0.18360000   1.75336758
  0.18360000   1.75618791
  0.18360000   1.75852508
  0.18360000   1.76045751
  0.18360000   1.76205223
  0.18360000   1.76336617
  0.18360000   1.76444731
  0.18360000   1.76533592
  0.18360000   1.76606558
  0.18360000   1.76666427
  0.18360000   1.76715515
  0.18360000   1.76755742
  0.18360000   1.76788691
  0.18380000   1.68462997
  0.18380000   1.69865981
  0.18380000   1.71085662
  0.18380000   1.72136667
  0.18380000   1.73035053
  0.18380000   1.73797436
  0.18380000   1.74440260
  0.18380000   1.74979231
  0.18380000   1.75428927
  0.18380000   1.75802569
  0.18380000   1.76111914
  0.18380000   1.76367255
  0.18380000   1.76577486
  0.18380000   1.76750207
  0.18380000   1.76891861
  0.18380000   1.77007863
  0.18380000   1.77102741
  0.18380000   1.77180262
  0.18380000   1.77243546
  0.18380000   1.77295171
  0.18380000   1.77337259
  0.18380000   1.77371552
  0.18380000   1.77399483
  0.18400000   1.69612424
  0.18400000   1.70972030
  0.18400000   1.72145462
  0.18400000   1.73149177
  0.18400000   1.74000784
  0.18400000   1.74718131
  0.18400000   1.75318557
  0.18400000   1.75818355
  0.18400000   1.76232423
  0.18400000   1.76574084
  0.18400000   1.76855043
  0.18400000   1.77085423
  0.18400000   1.77273880
  0.18400000   1.77427735
  0.18400000   1.77553135
  0.18400000   1.77655202
  0.18400000   1.77738183
  0.18400000   1.77805582
  0.18400000   1.77860283
  0.18400000   1.77904647
  0.18400000   1.77940607
  0.18400000   1.77969742
  0.18400000   1.77993335
  0.18420000   1.70729406
  0.18420000   1.72043201
  0.18420000   1.73168716
  0.18420000   1.74124234
  0.18420000   1.74928865
  0.18420000   1.75601588
  0.18420000   1.76160522
  0.18420000   1.76622423
  0.18420000   1.77002391
  0.18420000   1.77313754
  0.18420000   1.77568072
  0.18420000   1.77775236
  0.18420000   1.77943611
  0.18420000   1.78080207
  0.18420000   1.78190851
  0.18420000   1.78280360
  0.18420000   1.78352696
  0.18420000   1.78411102
  0.18420000   1.78458225
  0.18420000   1.78496222
  0.18420000   1.78526844
  0.18420000   1.78551510
  0.18420000   1.78571370
  0.18440000   1.71813519
  0.18440000   1.73079395
  0.18440000   1.74155680
  0.18440000   1.75062454
  0.18440000   1.75820242
  0.18440000   1.76449046
  0.18440000   1.76967633
  0.18440000   1.77393094
  0.18440000   1.77740616
  0.18440000   1.78023430
  0.18440000   1.78252878
  0.18440000   1.78438559
  0.18440000   1.78588505
  0.18440000   1.78709385
  0.18440000   1.78806695
  0.18440000   1.78884940
  0.18440000   1.78947792
  0.18440000   1.78998240
  0.18440000   1.79038704
  0.18440000   1.79071140
  0.18440000   1.79097128
  0.18440000   1.79117940
  0.18440000   1.79134599
  0.18460000   1.72864479
  0.18460000   1.74080666
  0.18460000   1.75106763
  0.18460000   1.75964591
  0.18460000   1.76675987
  0.18460000   1.77261839
  0.18460000   1.77741429
  0.18460000   1.78132052
  0.18460000   1.78448871
  0.18460000   1.78704928
  0.18460000   1.78911278
  0.18460000   1.79077174
  0.18460000   1.79210286
  0.18460000   1.79316922
  0.18460000   1.79402236
  0.18460000   1.79470416
  0.18460000   1.79524856
  0.18460000   1.79568291
  0.18460000   1.79602924
  0.18460000   1.79630523
  0.18460000   1.79652505
  0.18460000   1.79670006
  0.18460000   1.79683932
  0.18480000   1.73882137
  0.18480000   1.75047214
  0.18480000   1.76022521
  0.18480000   1.76831533
  0.18480000   1.77497273
  0.18480000   1.78041374
  0.18480000   1.78483488
  0.18480000   1.78840989
  0.18480000   1.79128906
  0.18480000   1.79360011
  0.18480000   1.79545010
  0.18480000   1.79692770
  0.18480000   1.79810574
  0.18480000   1.79904354
  0.18480000   1.79978920
  0.18480000   1.80038148
  0.18480000   1.80085153
  0.18480000   1.80122433
  0.18480000   1.80151981
  0.18480000   1.80175387
  0.18480000   1.80193920
  0.18480000   1.80208586
  0.18480000   1.80220188
  0.18500000   1.74866485
  0.18500000   1.75979384
  0.18500000   1.76903642
  0.18500000   1.77664280
  0.18500000   1.78285362
  0.18500000   1.78789113
  0.18500000   1.79195410
  0.18500000   1.79521583
  0.18500000   1.79782428
  0.18500000   1.79990376
  0.18500000   1.80155729
  0.18500000   1.80286939
  0.18500000   1.80390880
  0.18500000   1.80473106
  0.18500000   1.80538080
  0.18500000   1.80589375
  0.18500000   1.80629837
  0.18500000   1.80661734
  0.18500000   1.80686864
  0.18500000   1.80706651
  0.18500000   1.80722223
  0.18500000   1.80734473
  0.18500000   1.80744104
  0.18520000   1.75817649
  0.18520000   1.76877652
  0.18520000   1.77750936
  0.18520000   1.78463930
  0.18520000   1.79041582
  0.18520000   1.79506549
  0.18520000   1.79878795
  0.18520000   1.80175485
  0.18520000   1.80411094
  0.18520000   1.80597646
  0.18520000   1.80745002
  0.18520000   1.80861171
  0.18520000   1.80952610
  0.18520000   1.81024492
  0.18520000   1.81080941
  0.18520000   1.81125231
  0.18520000   1.81159955
  0.18520000   1.81187163
  0.18520000   1.81208467
  0.18520000   1.81225141
  0.18520000   1.81238183
  0.18520000   1.81248379
  0.18520000   1.81256345
  0.18540000   1.76735891
  0.18540000   1.77742624
  0.18540000   1.78565320
  0.18540000   1.79231662
  0.18540000   1.79767311
  0.18540000   1.80195196
  0.18540000   1.80535229
  0.18540000   1.80804303
  0.18540000   1.81016495
  0.18540000   1.81183365
  0.18540000   1.81314301
  0.18540000   1.81416856
  0.18540000   1.81497065
  0.18540000   1.81559722
  0.18540000   1.81608620
  0.18540000   1.81646749
  0.18540000   1.81676459
  0.18540000   1.81699595
  0.18540000   1.81717600
  0.18540000   1.81731605
  0.18540000   1.81742491
  0.18540000   1.81750948
  0.18540000   1.81757513
  0.18560000   1.77621595
  0.18560000   1.78575017
  0.18560000   1.79347805
  0.18560000   1.79968720
  0.18560000   1.80463959
  0.18560000   1.80856566
  0.18560000   1.81166270
  0.18560000   1.81409594
  0.18560000   1.81600148
  0.18560000   1.81748989
  0.18560000   1.81865006
  0.18560000   1.81955286
  0.18560000   1.82025443
  0.18560000   1.82079902
  0.18560000   1.82122137
  0.18560000   1.82154865
  0.18560000   1.82180209
  0.18560000   1.82199823
  0.18560000   1.82214992
  0.18560000   1.82226716
  0.18560000   1.82235772
  0.18560000   1.82242762
  0.18560000   1.82248153
  0.18580000   1.78475264
  0.18580000   1.79375654
  0.18580000   1.80099479
  0.18580000   1.80676394
  0.18580000   1.81132952
  0.18580000   1.81492157
  0.18580000   1.81773435
  0.18580000   1.81992854
  0.18580000   1.82163498
  0.18580000   1.82295888
  0.18580000   1.82398399
  0.18580000   1.82477652
  0.18580000   1.82538845
  0.18580000   1.82586046
  0.18580000   1.82622421
  0.18580000   1.82650432
  0.18580000   1.82671987
  0.18580000   1.82688563
  0.18580000   1.82701301
  0.18580000   1.82711084
  0.18580000   1.82718592
  0.18580000   1.82724348
  0.18580000   1.82728757
  0.18600000   1.79297515
  0.18600000   1.80145448
  0.18600000   1.80821496
  0.18600000   1.81356009
  0.18600000   1.81775717
  0.18600000   1.82103441
  0.18600000   1.82358192
  0.18600000   1.82555509
  0.18600000   1.82707906
  0.18600000   1.82825341
  0.18600000   1.82915672
  0.18600000   1.82985054
  0.18600000   1.83038282
  0.18600000   1.83079076
  0.18600000   1.83110315
  0.18600000   1.83134219
  0.18600000   1.83152496
  0.18600000   1.83166462
  0.18600000   1.83177125
  0.18600000   1.83185261
  0.18600000   1.83191462
  0.18600000   1.83196184
  0.18600000   1.83199775
  0.18620000   1.80089061
  0.18620000   1.80885389
  0.18620000   1.81515055
  0.18620000   1.82008904
  0.18620000   1.82393670
  0.18620000   1.82691852
  0.18620000   1.82921951
  0.18620000   1.83098915
  0.18620000   1.83234650
  0.18620000   1.83338541
  0.18620000   1.83417926
  0.18620000   1.83478502
  0.18620000   1.83524674
  0.18620000   1.83559834
  0.18620000   1.83586586
  0.18620000   1.83606925
  0.18620000   1.83622376
  0.18620000   1.83634106
  0.18620000   1.83643003
  0.18620000   1.83649745
  0.18620000   1.83654848
  0.18620000   1.83658706
  0.18620000   1.83661618
  0.18640000   1.80850705
  0.18640000   1.81596530
  0.18640000   1.82181391
  0.18640000   1.82636424
  0.18640000   1.82988202
  0.18640000   1.83258777
  0.18640000   1.83466058
  0.18640000   1.83624348
  0.18640000   1.83744925
  0.18640000   1.83836593
  0.18640000   1.83906173
  0.18640000   1.83958920
  0.18640000   1.83998864
  0.18640000   1.84029083
  0.18640000   1.84051928
  0.18640000   1.84069183
  0.18640000   1.84082205
  0.18640000   1.84092025
  0.18640000   1.84099423
  0.18640000   1.84104990
  0.18640000   1.84109174
  0.18640000   1.84112312
  0.18640000   1.84114663
  0.18660000   1.81583330
  0.18660000   1.82279977
  0.18660000   1.82821759
  0.18660000   1.83239905
  0.18660000   1.83560671
  0.18660000   1.83805551
  0.18660000   1.83991790
  0.18660000   1.84133011
  0.18660000   1.84239846
  0.18660000   1.84320519
  0.18660000   1.84381346
  0.18660000   1.84427154
  0.18660000   1.84461616
  0.18660000   1.84487518
  0.18660000   1.84506969
  0.18660000   1.84521565
  0.18660000   1.84532506
  0.18660000   1.84540700
  0.18660000   1.84546830
  0.18660000   1.84551410
  0.18660000   1.84554825
  0.18660000   1.84557367
  0.18660000   1.84559255
  0.18680000   1.82287883
  0.18680000   1.82936872
  0.18680000   1.83437421
  0.18680000   1.83820664
  0.18680000   1.84112392
  0.18680000   1.84333447
  0.18680000   1.84500354
  0.18680000   1.84626027
  0.18680000   1.84720446
  0.18680000   1.84791261
  0.18680000   1.84844298
  0.18680000   1.84883975
  0.18680000   1.84913627
  0.18680000   1.84935767
  0.18680000   1.84952282
  0.18680000   1.84964590
  0.18680000   1.84973754
  0.18680000   1.84980569
  0.18680000   1.84985629
  0.18680000   1.84989381
  0.18680000   1.84992157
  0.18680000   1.84994206
  0.18680000   1.84995712
  0.18700000   1.82965366
  0.18700000   1.83568381
  0.18700000   1.84029637
  0.18700000   1.84379987
  0.18700000   1.84644633
  0.18700000   1.84843679
  0.18700000   1.84992886
  0.18700000   1.85104442
  0.18700000   1.85187678
  0.18700000   1.85249683
  0.18700000   1.85295810
  0.18700000   1.85330086
  0.18700000   1.85355531
  0.18700000   1.85374401
  0.18700000   1.85388383
  0.18700000   1.85398730
  0.18700000   1.85406380
  0.18700000   1.85412027
  0.18700000   1.85416189
  0.18700000   1.85419250
  0.18700000   1.85421495
  0.18700000   1.85423137
  0.18700000   1.85424331
  0.18720000   1.83616824
  0.18720000   1.84175686
  0.18720000   1.84599651
  0.18720000   1.84919126
  0.18720000   1.85158605
  0.18720000   1.85337391
  0.18720000   1.85470447
  0.18720000   1.85569229
  0.18720000   1.85642425
  0.18720000   1.85696579
  0.18720000   1.85736593
  0.18720000   1.85766127
  0.18720000   1.85787902
  0.18720000   1.85803940
  0.18720000   1.85815741
  0.18720000   1.85824413
  0.18720000   1.85830777
  0.18720000   1.85835439
  0.18720000   1.85838848
  0.18720000   1.85841334
  0.18720000   1.85843140
  0.18720000   1.85844447
  0.18720000   1.85845387
  0.18740000   1.84243331
  0.18740000   1.84759968
  0.18740000   1.85148686
  0.18740000   1.85439288
  0.18740000   1.85655464
  0.18740000   1.85815662
  0.18740000   1.85934029
  0.18740000   1.86021287
  0.18740000   1.86085497
  0.18740000   1.86132676
  0.18740000   1.86167298
  0.18740000   1.86192678
  0.18740000   1.86211261
  0.18740000   1.86224854
  0.18740000   1.86234784
  0.18740000   1.86242028
  0.18740000   1.86247303
  0.18740000   1.86251137
  0.18740000   1.86253917
  0.18740000   1.86255924
  0.18740000   1.86257368
  0.18740000   1.86258401
  0.18740000   1.86259134
  0.18760000   1.84845982
  0.18760000   1.85322404
  0.18760000   1.85677933
  0.18760000   1.85941631
  0.18760000   1.86136305
  0.18760000   1.86279506
  0.18760000   1.86384553
  0.18760000   1.86461447
  0.18760000   1.86517635
  0.18760000   1.86558636
  0.18760000   1.86588517
  0.18760000   1.86610269
  0.18760000   1.86626084
  0.18760000   1.86637570
  0.18760000   1.86645899
  0.18760000   1.86651929
  0.18760000   1.86656286
  0.18760000   1.86659426
  0.18760000   1.86661680
  0.18760000   1.86663293
  0.18760000   1.86664440
  0.18760000   1.86665249
  0.18760000   1.86665814
  0.18780000   1.85425882
  0.18780000   1.85864152
  0.18780000   1.86188544
  0.18780000   1.86427263
  0.18780000   1.86602159
  0.18780000   1.86729866
  0.18780000   1.86822873
  0.18780000   1.86890472
  0.18780000   1.86939522
  0.18780000   1.86975065
  0.18780000   1.87000787
  0.18780000   1.87019380
  0.18780000   1.87032802
  0.18780000   1.87042478
  0.18780000   1.87049441
  0.18780000   1.87054443
  0.18780000   1.87058026
  0.18780000   1.87060585
  0.18780000   1.87062404
  0.18780000   1.87063691
  0.18780000   1.87064594
  0.18780000   1.87065221
  0.18780000   1.87065650
  0.18800000   1.85984135
  0.18800000   1.86386347
  0.18800000   1.86681633
  0.18800000   1.86897233
  0.18800000   1.87053998
  0.18800000   1.87167623
  0.18800000   1.87249778
  0.18800000   1.87309065
  0.18800000   1.87351781
  0.18800000   1.87382515
  0.18800000   1.87404600
  0.18800000   1.87420448
  0.18800000   1.87431806
  0.18800000   1.87439931
  0.18800000   1.87445733
  0.18800000   1.87449866
  0.18800000   1.87452800
  0.18800000   1.87454874
  0.18800000   1.87456333
  0.18800000   1.87457352
  0.18800000   1.87458056
  0.18800000   1.87458535
  0.18800000   1.87458855
  0.18820000   1.86521836
  0.18820000   1.86890093
  0.18820000   1.87158262
  0.18820000   1.87352538
  0.18820000   1.87492730
  0.18820000   1.87593595
  0.18820000   1.87665996
  0.18820000   1.87717870
  0.18820000   1.87754979
  0.18820000   1.87781489
  0.18820000   1.87800400
  0.18820000   1.87813872
  0.18820000   1.87823454
  0.18820000   1.87830255
  0.18820000   1.87835071
  0.18820000   1.87838471
  0.18820000   1.87840862
  0.18820000   1.87842535
  0.18820000   1.87843696
  0.18820000   1.87844495
  0.18820000   1.87845036
  0.18820000   1.87845396
  0.18820000   1.87845628
  0.18840000   1.87040065
  0.18840000   1.87376458
  0.18840000   1.87619448
  0.18840000   1.87794113
  0.18840000   1.87919203
  0.18840000   1.88008537
  0.18840000   1.88072195
  0.18840000   1.88117477
  0.18840000   1.88149637
  0.18840000   1.88172444
  0.18840000   1.88188595
  0.18840000   1.88200014
  0.18840000   1.88208072
  0.18840000   1.88213745
  0.18840000   1.88217727
  0.18840000   1.88220512
  0.18840000   1.88222449
  0.18840000   1.88223788
  0.18840000   1.88224705
  0.18840000   1.88225324
  0.18840000   1.88225734
  0.18840000   1.88225998
  0.18840000   1.88226160
  0.18860000   1.87539879
  0.18860000   1.87846471
  0.18860000   1.88066154
  0.18860000   1.88222839
  0.18860000   1.88334204
  0.18860000   1.88413148
  0.18860000   1.88468991
  0.18860000   1.88508425
  0.18860000   1.88536227
  0.18860000   1.88555798
  0.18860000   1.88569554
  0.18860000   1.88579203
  0.18860000   1.88585958
  0.18860000   1.88590672
  0.18860000   1.88593951
  0.18860000   1.88596220
  0.18860000   1.88597781
  0.18860000   1.88598844
  0.18860000   1.88599560
  0.18860000   1.88600033
  0.18860000   1.88600336
  0.18860000   1.88600523
  0.18860000   1.88600629
  0.18880000   1.88022305
  0.18880000   1.88301116
  0.18880000   1.88499290
  0.18880000   1.88639537
  0.18880000   1.88738465
  0.18880000   1.88808071
  0.18880000   1.88856947
  0.18880000   1.88891206
  0.18880000   1.88915181
  0.18880000   1.88931932
  0.18880000   1.88943614
  0.18880000   1.88951743
  0.18880000   1.88957385
  0.18880000   1.88961287
  0.18880000   1.88963974
  0.18880000   1.88965813
  0.18880000   1.88967060
  0.18880000   1.88967897
  0.18880000   1.88968448
  0.18880000   1.88968802
  0.18880000   1.88969021
  0.18880000   1.88969146
  0.18880000   1.88969207
  0.18900000   1.88488337
  0.18900000   1.88741330
  0.18900000   1.88919715
  0.18900000   1.89044977
  0.18900000   1.89132664
  0.18900000   1.89193900
  0.18900000   1.89236579
  0.18900000   1.89266271
  0.18900000   1.89286894
  0.18900000   1.89301192
  0.18900000   1.89311083
  0.18900000   1.89317909
  0.18900000   1.89322605
  0.18900000   1.89325820
  0.18900000   1.89328010
  0.18900000   1.89329490
  0.18900000   1.89330479
  0.18900000   1.89331129
  0.18900000   1.89331547
  0.18900000   1.89331805
  0.18900000   1.89331954
  0.18900000   1.89332030
  0.18900000   1.89332057
  0.18920000   1.88938932
  0.18920000   1.89168006
  0.18920000   1.89328232
  0.18920000   1.89439870
  0.18920000   1.89517425
  0.18920000   1.89571177
  0.18920000   1.89608358
  0.18920000   1.89634031
  0.18920000   1.89651724
  0.18920000   1.89663894
  0.18920000   1.89672244
  0.18920000   1.89677956
  0.18920000   1.89681847
  0.18920000   1.89684485
  0.18920000   1.89686259
  0.18920000   1.89687441
  0.18920000   1.89688216
  0.18920000   1.89688714
  0.18920000   1.89689023
  0.18920000   1.89689204
  0.18920000   1.89689298
  0.18920000   1.89689335
  0.18920000   1.89689334
  0.18940000   1.89375008
  0.18940000   1.89581983
  0.18940000   1.89725596
  0.18940000   1.89824879
  0.18940000   1.89893323
  0.18940000   1.89940401
  0.18940000   1.89972718
  0.18940000   1.89994860
  0.18940000   1.90010000
  0.18940000   1.90020328
  0.18940000   1.90027354
  0.18940000   1.90032115
  0.18940000   1.90035326
  0.18940000   1.90037478
  0.18940000   1.90038905
  0.18940000   1.90039840
  0.18940000   1.90040440
  0.18940000   1.90040814
  0.18940000   1.90041034
  0.18940000   1.90041153
  0.18940000   1.90041204
  0.18940000   1.90041210
  0.18940000   1.90041187
  0.18960000   1.89797439
  0.18960000   1.89984056
  0.18960000   1.90112508
  0.18960000   1.90200617
  0.18960000   1.90260890
  0.18960000   1.90302029
  0.18960000   1.90330051
  0.18960000   1.90349100
  0.18960000   1.90362019
  0.18960000   1.90370758
  0.18960000   1.90376649
  0.18960000   1.90380603
  0.18960000   1.90383240
  0.18960000   1.90384983
  0.18960000   1.90386122
  0.18960000   1.90386853
  0.18960000   1.90387310
  0.18960000   1.90387582
  0.18960000   1.90387732
  0.18960000   1.90387800
  0.18960000   1.90387816
  0.18960000   1.90387798
  0.18960000   1.90387759
  0.18980000   1.90207055
  0.18980000   1.90374969
  0.18980000   1.90489622
  0.18980000   1.90567649
  0.18980000   1.90620611
  0.18980000   1.90656479
  0.18980000   1.90680719
  0.18980000   1.90697064
  0.18980000   1.90708058
  0.18980000   1.90715428
  0.18980000   1.90720349
  0.18980000   1.90723617
  0.18980000   1.90725770
  0.18980000   1.90727173
  0.18980000   1.90728073
  0.18980000   1.90728636
  0.18980000   1.90728975
  0.18980000   1.90729165
  0.18980000   1.90729258
  0.18980000   1.90729287
  0.18980000   1.90729276
  0.18980000   1.90729239
  0.18980000   1.90729186
  0.19000000   1.90604643
  0.19000000   1.90755419
  0.19000000   1.90857544
  0.19000000   1.90926497
  0.19000000   1.90972933
  0.19000000   1.91004133
  0.19000000   1.91025050
  0.19000000   1.91039038
  0.19000000   1.91048365
  0.19000000   1.91054560
  0.19000000   1.91058654
  0.19000000   1.91061342
  0.19000000   1.91063089
  0.19000000   1.91064208
  0.19000000   1.91064910
  0.19000000   1.91065335
  0.19000000   1.91065578
  0.19000000   1.91065703
  0.19000000   1.91065750
  0.19000000   1.91065747
  0.19000000   1.91065714
  0.19000000   1.91065662
  0.19000000   1.91065600
  0.19020000   1.90990945
  0.19020000   1.91126058
  0.19020000   1.91216837
  0.19020000   1.91277642
  0.19020000   1.91318266
  0.19020000   1.91345343
  0.19020000   1.91363347
  0.19020000   1.91375284
  0.19020000   1.91383171
  0.19020000   1.91388359
  0.19020000   1.91391751
  0.19020000   1.91393949
  0.19020000   1.91395355
  0.19020000   1.91396238
  0.19020000   1.91396777
  0.19020000   1.91397090
  0.19020000   1.91397255
  0.19020000   1.91397326
  0.19020000   1.91397337
  0.19020000   1.91397310
  0.19020000   1.91397260
  0.19020000   1.91397197
  0.19020000   1.91397127
  0.19040000   1.91366658
  0.19040000   1.91487490
  0.19040000   1.91568018
  0.19040000   1.91621524
  0.19040000   1.91656984
  0.19040000   1.91680427
  0.19040000   1.91695883
  0.19040000   1.91706041
  0.19040000   1.91712689
  0.19040000   1.91717016
  0.19040000   1.91719811
  0.19040000   1.91721597
  0.19040000   1.91722719
  0.19040000   1.91723406
  0.19040000   1.91723811
  0.19040000   1.91724032
  0.19040000   1.91724135
  0.19040000   1.91724163
  0.19040000   1.91724145
  0.19040000   1.91724098
  0.19040000   1.91724035
  0.19040000   1.91723963
  0.19040000   1.91723888
  0.19060000   1.91732435
  0.19060000   1.91840280
  0.19060000   1.91911567
  0.19060000   1.91958549
  0.19060000   1.91989433
  0.19060000   1.92009679
  0.19060000   1.92022912
  0.19060000   1.92031529
  0.19060000   1.92037112
  0.19060000   1.92040705
  0.19060000   1.92042996
  0.19060000   1.92044435
  0.19060000   1.92045321
  0.19060000   1.92045847
  0.19060000   1.92046141
  0.19060000   1.92046288
  0.19060000   1.92046340
  0.19060000   1.92046334
  0.19060000   1.92046293
  0.19060000   1.92046231
  0.19060000   1.92046158
  0.19060000   1.92046080
  0.19060000   1.92046000
  0.19080000   1.92088889
  0.19080000   1.92184949
  0.19080000   1.92247925
  0.19080000   1.92289091
  0.19080000   1.92315925
  0.19080000   1.92333367
  0.19080000   1.92344664
  0.19080000   1.92351950
  0.19080000   1.92356620
  0.19080000   1.92359589
  0.19080000   1.92361454
  0.19080000   1.92362604
  0.19080000   1.92363293
  0.19080000   1.92363686
  0.19080000   1.92363891
  0.19080000   1.92363977
  0.19080000   1.92363989
  0.19080000   1.92363956
  0.19080000   1.92363897
  0.19080000   1.92363823
  0.19080000   1.92363742
  0.19080000   1.92363659
  0.19080000   1.92363575
  0.19100000   1.92436588
  0.19100000   1.92521980
  0.19100000   1.92577499
  0.19100000   1.92613488
  0.19100000   1.92636750
  0.19100000   1.92651736
  0.19100000   1.92661352
  0.19100000   1.92667491
  0.19100000   1.92671381
  0.19100000   1.92673820
  0.19100000   1.92675327
  0.19100000   1.92676235
  0.19100000   1.92676761
  0.19100000   1.92677045
  0.19100000   1.92677176
  0.19100000   1.92677213
  0.19100000   1.92677193
  0.19100000   1.92677139
  0.19100000   1.92677066
  0.19100000   1.92676983
  0.19100000   1.92676896
  0.19100000   1.92676809
  0.19100000   1.92676724
  0.19120000   1.92776063
  0.19120000   1.92851819
  0.19120000   1.92900662
  0.19120000   1.92932056
  0.19120000   1.92952170
  0.19120000   1.92965012
  0.19120000   1.92973171
  0.19120000   1.92978324
  0.19120000   1.92981548
  0.19120000   1.92983539
  0.19120000   1.92984745
  0.19120000   1.92985451
  0.19120000   1.92985843
  0.19120000   1.92986038
  0.19120000   1.92986110
  0.19120000   1.92986108
  0.19120000   1.92986062
  0.19120000   1.92985991
  0.19120000   1.92985907
  0.19120000   1.92985817
  0.19120000   1.92985726
  0.19120000   1.92985636
  0.19120000   1.92985549
  0.19140000   1.93107806
  0.19140000   1.93174879
  0.19140000   1.93217757
  0.19140000   1.93245079
  0.19140000   1.93262429
  0.19140000   1.93273401
  0.19140000   1.93280301
  0.19140000   1.93284607
  0.19140000   1.93287265
  0.19140000   1.93288878
  0.19140000   1.93289832
  0.19140000   1.93290371
  0.19140000   1.93290652
  0.19140000   1.93290774
  0.19140000   1.93290798
  0.19140000   1.93290765
  0.19140000   1.93290699
  0.19140000   1.93290615
  0.19140000   1.93290522
  0.19140000   1.93290427
  0.19140000   1.93290333
  0.19140000   1.93290241
  0.19140000   1.93290153
  0.19160000   1.93432274
  0.19160000   1.93491539
  0.19160000   1.93529099
  0.19160000   1.93552822
  0.19160000   1.93567748
  0.19160000   1.93577094
  0.19160000   1.93582907
  0.19160000   1.93586489
  0.19160000   1.93588666
  0.19160000   1.93589961
  0.19160000   1.93590705
  0.19160000   1.93591106
  0.19160000   1.93591296
  0.19160000   1.93591359
  0.19160000   1.93591345
  0.19160000   1.93591286
  0.19160000   1.93591204
  0.19160000   1.93591110
  0.19160000   1.93591011
  0.19160000   1.93590912
  0.19160000   1.93590815
  0.19160000   1.93590722
  0.19160000   1.93590633
  0.19180000   1.93749890
  0.19180000   1.93802148
  0.19180000   1.93834977
  0.19180000   1.93855525
  0.19180000   1.93868330
  0.19180000   1.93876265
  0.19180000   1.93881143
  0.19180000   1.93884108
  0.19180000   1.93885878
  0.19180000   1.93886905
  0.19180000   1.93887474
  0.19180000   1.93887761
  0.19180000   1.93887877
  0.19180000   1.93887891
  0.19180000   1.93887846
  0.19180000   1.93887769
  0.19180000   1.93887674
  0.19180000   1.93887572
  0.19180000   1.93887468
  0.19180000   1.93887366
  0.19180000   1.93887268
  0.19180000   1.93887174
  0.19180000   1.93887085
  0.19200000   1.94061043
  0.19200000   1.94107026
  0.19200000   1.94135656
  0.19200000   1.94153410
  0.19200000   1.94164364
  0.19200000   1.94171077
  0.19200000   1.94175152
  0.19200000   1.94177590
  0.19200000   1.94179016
  0.19200000   1.94179820
  0.19200000   1.94180243
  0.19200000   1.94180436
  0.19200000   1.94180492
  0.19200000   1.94180468
  0.19200000   1.94180398
  0.19200000   1.94180305
  0.19200000   1.94180201
  0.19200000   1.94180093
  0.19200000   1.94179986
  0.19200000   1.94179882
  0.19200000   1.94179782
  0.19200000   1.94179688
  0.19200000   1.94179598
  0.19220000   1.94366093
  0.19220000   1.94406470
  0.19220000   1.94431380
  0.19220000   1.94446679
  0.19220000   1.94456020
  0.19220000   1.94461678
  0.19220000   1.94465065
  0.19220000   1.94467056
  0.19220000   1.94468192
  0.19220000   1.94468809
  0.19220000   1.94469113
  0.19220000   1.94469229
  0.19220000   1.94469236
  0.19220000   1.94469181
  0.19220000   1.94469092
  0.19220000   1.94468986
  0.19220000   1.94468874
  0.19220000   1.94468762
  0.19220000   1.94468652
  0.19220000   1.94468547
  0.19220000   1.94468447
  0.19220000   1.94468352
  0.19220000   1.94468262
  0.19240000   1.94665374
  0.19240000   1.94700751
  0.19240000   1.94722372
  0.19240000   1.94735519
  0.19240000   1.94743458
  0.19240000   1.94748207
  0.19240000   1.94751006
  0.19240000   1.94752618
  0.19240000   1.94753511
  0.19240000   1.94753973
  0.19240000   1.94754177
  0.19240000   1.94754231
  0.19240000   1.94754198
  0.19240000   1.94754118
  0.19240000   1.94754014
  0.19240000   1.94753899
  0.19240000   1.94753781
  0.19240000   1.94753666
  0.19240000   1.94753554
  0.19240000   1.94753448
  0.19240000   1.94753347
  0.19240000   1.94753252
  0.19240000   1.94753163
  0.19260000   1.94959190
  0.19260000   1.94990118
  0.19260000   1.95008838
  0.19260000   1.95020102
  0.19260000   1.95026826
  0.19260000   1.95030792
  0.19260000   1.95033090
  0.19260000   1.95034382
  0.19260000   1.95035072
  0.19260000   1.95035404
  0.19260000   1.95035527
  0.19260000   1.95035529
  0.19260000   1.95035465
  0.19260000   1.95035365
  0.19260000   1.95035249
  0.19260000   1.95035127
  0.19260000   1.95035005
  0.19260000   1.95034887
  0.19260000   1.95034774
  0.19260000   1.95034667
  0.19260000   1.95034567
  0.19260000   1.95034472
  0.19260000   1.95034382
  0.19280000   1.95247822
  0.19280000   1.95274799
  0.19280000   1.95290965
  0.19280000   1.95300587
  0.19280000   1.95306258
  0.19280000   1.95309554
  0.19280000   1.95311425
  0.19280000   1.95312447
  0.19280000   1.95312967
  0.19280000   1.95313192
  0.19280000   1.95313248
  0.19280000   1.95313210
  0.19280000   1.95313120
  0.19280000   1.95313004
  0.19280000   1.95312879
  0.19280000   1.95312751
  0.19280000   1.95312627
  0.19280000   1.95312507
  0.19280000   1.95312393
  0.19280000   1.95312286
  0.19280000   1.95312185
  0.19280000   1.95312090
  0.19280000   1.95312001
  0.19300000   1.95531531
  0.19300000   1.95555006
  0.19300000   1.95568928
  0.19300000   1.95577118
  0.19300000   1.95581882
  0.19300000   1.95584603
  0.19300000   1.95586112
  0.19300000   1.95586907
  0.19300000   1.95587285
  0.19300000   1.95587423
  0.19300000   1.95587425
  0.19300000   1.95587353
  0.19300000   1.95587242
  0.19300000   1.95587115
  0.19300000   1.95586982
  0.19300000   1.95586851
  0.19300000   1.95586724
  0.19300000   1.95586603
  0.19300000   1.95586489
  0.19300000   1.95586382
  0.19300000   1.95586281
  0.19300000   1.95586186
  0.19300000   1.95586097
  0.19320000   1.95810554
  0.19320000   1.95830932
  0.19320000   1.95842886
  0.19320000   1.95849833
  0.19320000   1.95853813
  0.19320000   1.95856044
  0.19320000   1.95857247
  0.19320000   1.95857852
  0.19320000   1.95858113
  0.19320000   1.95858178
  0.19320000   1.95858136
  0.19320000   1.95858037
  0.19320000   1.95857911
  0.19320000   1.95857774
  0.19320000   1.95857636
  0.19320000   1.95857501
  0.19320000   1.95857373
  0.19320000   1.95857251
  0.19320000   1.95857137
  0.19320000   1.95857030
  0.19320000   1.95856929
  0.19320000   1.95856835
  0.19320000   1.95856746
  0.19340000   1.96085110
  0.19340000   1.96102753
  0.19340000   1.96112986
  0.19340000   1.96118854
  0.19340000   1.96122163
  0.19340000   1.96123975
  0.19340000   1.96124920
  0.19340000   1.96125367
  0.19340000   1.96125530
  0.19340000   1.96125536
  0.19340000   1.96125458
  0.19340000   1.96125337
  0.19340000   1.96125199
  0.19340000   1.96125055
  0.19340000   1.96124913
  0.19340000   1.96124776
  0.19340000   1.96124647
  0.19340000   1.96124525
  0.19340000   1.96124410
  0.19340000   1.96124303
  0.19340000   1.96124203
  0.19340000   1.96124109
  0.19340000   1.96124020
  0.19360000   1.96355401
  0.19360000   1.96370635
  0.19360000   1.96379364
  0.19360000   1.96384300
  0.19360000   1.96387031
  0.19360000   1.96388489
  0.19360000   1.96389217
  0.19360000   1.96389531
  0.19360000   1.96389613
  0.19360000   1.96389571
  0.19360000   1.96389464
  0.19360000   1.96389327
  0.19360000   1.96389179
  0.19360000   1.96389029
  0.19360000   1.96388884
  0.19360000   1.96388746
  0.19360000   1.96388616
  0.19360000   1.96388494
  0.19360000   1.96388380
  0.19360000   1.96388273
  0.19360000   1.96388173
  0.19360000   1.96388079
  0.19360000   1.96387991
  0.19380000   1.96621611
  0.19380000   1.96634727
  0.19380000   1.96642147
  0.19380000   1.96646277
  0.19380000   1.96648515
  0.19380000   1.96649672
  0.19380000   1.96650218
  0.19380000   1.96650421
  0.19380000   1.96650438
  0.19380000   1.96650357
  0.19380000   1.96650227
  0.19380000   1.96650077
  0.19380000   1.96649921
  0.19380000   1.96649767
  0.19380000   1.96649620
  0.19380000   1.96649481
  0.19380000   1.96649351
  0.19380000   1.96649229
  0.19380000   1.96649115
  0.19380000   1.96649008
  0.19380000   1.96648908
  0.19380000   1.96648815
  0.19380000   1.96648727
  0.19400000   1.96883911
  0.19400000   1.96895170
  0.19400000   1.96901451
  0.19400000   1.96904887
  0.19400000   1.96906704
  0.19400000   1.96907607
  0.19400000   1.96907999
  0.19400000   1.96908112
  0.19400000   1.96908075
  0.19400000   1.96907962
  0.19400000   1.96907814
  0.19400000   1.96907653
  0.19400000   1.96907492
  0.19400000   1.96907335
  0.19400000   1.96907187
  0.19400000   1.96907047
  0.19400000   1.96906917
  0.19400000   1.96906795
  0.19400000   1.96906681
  0.19400000   1.96906575
  0.19400000   1.96906475
  0.19400000   1.96906382
  0.19400000   1.96906295
  0.19420000   1.97142459
  0.19420000   1.97152091
  0.19420000   1.97157385
  0.19420000   1.97160224
  0.19420000   1.97161682
  0.19420000   1.97162371
  0.19420000   1.97162636
  0.19420000   1.97162674
  0.19420000   1.97162593
  0.19420000   1.97162454
  0.19420000   1.97162292
  0.19420000   1.97162123
  0.19420000   1.97161957
  0.19420000   1.97161799
  0.19420000   1.97161649
  0.19420000   1.97161510
  0.19420000   1.97161379
  0.19420000   1.97161258
  0.19420000   1.97161144
  0.19420000   1.97161038
  0.19420000   1.97160939
  0.19420000   1.97160846
  0.19420000   1.97160759
  0.19440000   1.97397399
  0.19440000   1.97405609
  0.19440000   1.97410048
  0.19440000   1.97412376
  0.19440000   1.97413530
  0.19440000   1.97414038
  0.19440000   1.97414198
  0.19440000   1.97414173
  0.19440000   1.97414057
  0.19440000   1.97413898
  0.19440000   1.97413725
  0.19440000   1.97413550
  0.19440000   1.97413381
  0.19440000   1.97413221
  0.19440000   1.97413071
  0.19440000   1.97412931
  0.19440000   1.97412801
  0.19440000   1.97412680
  0.19440000   1.97412567
  0.19440000   1.97412461
  0.19440000   1.97412362
  0.19440000   1.97412270
  0.19440000   1.97412183
  0.19460000   1.97648864
  0.19460000   1.97655835
  0.19460000   1.97659536
  0.19460000   1.97661426
  0.19460000   1.97662322
  0.19460000   1.97662680
  0.19460000   1.97662751
  0.19460000   1.97662676
  0.19460000   1.97662531
  0.19460000   1.97662357
  0.19460000   1.97662174
  0.19460000   1.97661995
  0.19460000   1.97661824
  0.19460000   1.97661663
  0.19460000   1.97661513
  0.19460000   1.97661373
  0.19460000   1.97661243
  0.19460000   1.97661123
  0.19460000   1.97661010
  0.19460000   1.97660905
  0.19460000   1.97660806
  0.19460000   1.97660714
  0.19460000   1.97660627
  0.19480000   1.97896978
  0.19480000   1.97902871
  0.19480000   1.97905935
  0.19480000   1.97907452
  0.19480000   1.97908130
  0.19480000   1.97908362
  0.19480000   1.97908361
  0.19480000   1.97908245
  0.19480000   1.97908077
  0.19480000   1.97907890
  0.19480000   1.97907701
  0.19480000   1.97907518
  0.19480000   1.97907346
  0.19480000   1.97907184
  0.19480000   1.97907034
  0.19480000   1.97906895
  0.19480000   1.97906766
  0.19480000   1.97906645
  0.19480000   1.97906533
  0.19480000   1.97906428
  0.19480000   1.97906330
  0.19480000   1.97906238
  0.19480000   1.97906151
  0.19500000   1.98141856
  0.19500000   1.98146811
  0.19500000   1.98149329
  0.19500000   1.98150528
  0.19500000   1.98151023
  0.19500000   1.98151150
  0.19500000   1.98151090
  0.19500000   1.98150940
  0.19500000   1.98150754
  0.19500000   1.98150557
  0.19500000   1.98150363
  0.19500000   1.98150178
  0.19500000   1.98150004
  0.19500000   1.98149843
  0.19500000   1.98149693
  0.19500000   1.98149554
  0.19500000   1.98149425
  0.19500000   1.98149305
  0.19500000   1.98149193
  0.19500000   1.98149089
  0.19500000   1.98148991
  0.19500000   1.98148899
  0.19500000   1.98148813
  0.19520000   1.98383601
  0.19520000   1.98387746
  0.19520000   1.98389795
  0.19520000   1.98390724
  0.19520000   1.98391065
  0.19520000   1.98391105
  0.19520000   1.98390996
  0.19520000   1.98390820
  0.19520000   1.98390619
  0.19520000   1.98390415
  0.19520000   1.98390217
  0.19520000   1.98390030
  0.19520000   1.98389856
  0.19520000   1.98389695
  0.19520000   1.98389545
  0.19520000   1.98389407
  0.19520000   1.98389278
  0.19520000   1.98389159
  0.19520000   1.98389047
  0.19520000   1.98388943
  0.19520000   1.98388845
  0.19520000   1.98388754
  0.19520000   1.98388668
  0.19540000   1.98622314
  0.19540000   1.98625758
  0.19540000   1.98627405
  0.19540000   1.98628106
  0.19540000   1.98628319
  0.19540000   1.98628286
  0.19540000   1.98628138
  0.19540000   1.98627940
  0.19540000   1.98627728
  0.19540000   1.98627518
  0.19540000   1.98627317
  0.19540000   1.98627130
  0.19540000   1.98626956
  0.19540000   1.98626794
  0.19540000   1.98626645
  0.19540000   1.98626507
  0.19540000   1.98626379
  0.19540000   1.98626260
  0.19540000   1.98626149
  0.19540000   1.98626045
  0.19540000   1.98625948
  0.19540000   1.98625856
  0.19540000   1.98625770
  0.19560000   1.98858085
  0.19560000   1.98860924
  0.19560000   1.98862228
  0.19560000   1.98862737
  0.19560000   1.98862842
  0.19560000   1.98862750
  0.19560000   1.98862570
  0.19560000   1.98862355
  0.19560000   1.98862134
  0.19560000   1.98861920
  0.19560000   1.98861718
  0.19560000   1.98861530
  0.19560000   1.98861356
  0.19560000   1.98861195
  0.19560000   1.98861046
  0.19560000   1.98860909
  0.19560000   1.98860781
  0.19560000   1.98860662
  0.19560000   1.98860551
  0.19560000   1.98860448
  0.19560000   1.98860351
  0.19560000   1.98860260
  0.19560000   1.98860174
  0.19580000   1.99090999
  0.19580000   1.99093317
  0.19580000   1.99094330
  0.19580000   1.99094677
  0.19580000   1.99094693
  0.19580000   1.99094552
  0.19580000   1.99094346
  0.19580000   1.99094118
  0.19580000   1.99093890
  0.19580000   1.99093673
  0.19580000   1.99093470
  0.19580000   1.99093282
  0.19580000   1.99093108
  0.19580000   1.99092948
  0.19580000   1.99092800
  0.19580000   1.99092662
  0.19580000   1.99092535
  0.19580000   1.99092417
  0.19580000   1.99092306
  0.19580000   1.99092203
  0.19580000   1.99092106
  0.19580000   1.99092015
  0.19580000   1.99091930
  0.19600000   1.99321135
  0.19600000   1.99323007
  0.19600000   1.99323772
  0.19600000   1.99323983
  0.19600000   1.99323925
  0.19600000   1.99323745
  0.19600000   1.99323518
  0.19600000   1.99323280
  0.19600000   1.99323047
  0.19600000   1.99322828
  0.19600000   1.99322624
  0.19600000   1.99322436
  0.19600000   1.99322263
  0.19600000   1.99322103
  0.19600000   1.99321955
  0.19600000   1.99321819
  0.19600000   1.99321692
  0.19600000   1.99321574
  0.19600000   1.99321464
  0.19600000   1.99321361
  0.19600000   1.99321264
  0.19600000   1.99321173
  0.19600000   1.99321088
  0.19620000   1.99548567
  0.19620000   1.99550057
  0.19620000   1.99550613
  0.19620000   1.99550710
  0.19620000   1.99550591
  0.19620000   1.99550380
  0.19620000   1.99550136
  0.19620000   1.99549890
  0.19620000   1.99549654
  0.19620000   1.99549433
  0.19620000   1.99549229
  0.19620000   1.99549041
  0.19620000   1.99548868
  0.19620000   1.99548709
  0.19620000   1.99548562
  0.19620000   1.99548426
  0.19620000   1.99548300
  0.19620000   1.99548182
  0.19620000   1.99548072
  0.19620000   1.99547970
  0.19620000   1.99547873
  0.19620000   1.99547783
  0.19620000   1.99547697
  0.19640000   1.99773366
  0.19640000   1.99774530
  0.19640000   1.99774909
  0.19640000   1.99774911
  0.19640000   1.99774742
  0.19640000   1.99774505
  0.19640000   1.99774249
  0.19640000   1.99773996
  0.19640000   1.99773758
  0.19640000   1.99773536
  0.19640000   1.99773332
  0.19640000   1.99773145
  0.19640000   1.99772973
  0.19640000   1.99772814
  0.19640000   1.99772668
  0.19640000   1.99772532
  0.19640000   1.99772406
  0.19640000   1.99772289
  0.19640000   1.99772179
  0.19640000   1.99772077
  0.19640000   1.99771981
  0.19640000   1.99771890
  0.19640000   1.99771805
  0.19660000   1.99995597
  0.19660000   1.99996482
  0.19660000   1.99996713
  0.19660000   1.99996637
  0.19660000   1.99996427
  0.19660000   1.99996169
  0.19660000   1.99995903
  0.19660000   1.99995646
  0.19660000   1.99995405
  0.19660000   1.99995184
  0.19660000   1.99994980
  0.19660000   1.99994794
  0.19660000   1.99994622
  0.19660000   1.99994464
  0.19660000   1.99994318
  0.19660000   1.99994183
  0.19660000   1.99994057
  0.19660000   1.99993941
  0.19660000   1.99993831
  0.19660000   1.99993729
  0.19660000   1.99993633
  0.19660000   1.99993543
  0.19660000   1.99993458
  0.19680000   2.00215321
  0.19680000   2.00215970
  0.19680000   2.00216076
  0.19680000   2.00215935
  0.19680000   2.00215692
  0.19680000   2.00215418
  0.19680000   2.00215144
  0.19680000   2.00214884
  0.19680000   2.00214643
  0.19680000   2.00214421
  0.19680000   2.00214218
  0.19680000   2.00214032
  0.19680000   2.00213861
  0.19680000   2.00213704
  0.19680000   2.00213558
  0.19680000   2.00213424
  0.19680000   2.00213299
  0.19680000   2.00213182
  0.19680000   2.00213073
  0.19680000   2.00212971
  0.19680000   2.00212875
  0.19680000   2.00212785
  0.19680000   2.00212700
  0.19700000   2.00432596
  0.19700000   2.00433046
  0.19700000   2.00433047
  0.19700000   2.00432853
  0.19700000   2.00432583
  0.19700000   2.00432296
  0.19700000   2.00432017
  0.19700000   2.00431755
  0.19700000   2.00431513
  0.19700000   2.00431292
  0.19700000   2.00431089
  0.19700000   2.00430904
  0.19700000   2.00430734
  0.19700000   2.00430577
  0.19700000   2.00430432
  0.19700000   2.00430298
  0.19700000   2.00430173
  0.19700000   2.00430057
  0.19700000   2.00429948
  0.19700000   2.00429846
  0.19700000   2.00429751
  0.19700000   2.00429661
  0.19700000   2.00429576
  0.19720000   2.00647478
  0.19720000   2.00647759
  0.19720000   2.00647674
  0.19720000   2.00647436
  0.19720000   2.00647145
  0.19720000   2.00646848
  0.19720000   2.00646564
  0.19720000   2.00646301
  0.19720000   2.00646059
  0.19720000   2.00645839
  0.19720000   2.00645637
  0.19720000   2.00645452
  0.19720000   2.00645283
  0.19720000   2.00645127
  0.19720000   2.00644982
  0.19720000   2.00644848
  0.19720000   2.00644724
  0.19720000   2.00644608
  0.19720000   2.00644499
  0.19720000   2.00644398
  0.19720000   2.00644302
  0.19720000   2.00644212
  0.19720000   2.00644128
  0.19740000   2.00860018
  0.19740000   2.00860157
  0.19740000   2.00860001
  0.19740000   2.00859727
  0.19740000   2.00859420
  0.19740000   2.00859115
  0.19740000   2.00858829
  0.19740000   2.00858565
  0.19740000   2.00858323
  0.19740000   2.00858103
  0.19740000   2.00857902
  0.19740000   2.00857719
  0.19740000   2.00857550
  0.19740000   2.00857394
  0.19740000   2.00857250
  0.19740000   2.00857117
  0.19740000   2.00856993
  0.19740000   2.00856877
  0.19740000   2.00856769
  0.19740000   2.00856667
  0.19740000   2.00856572
  0.19740000   2.00856482
  0.19740000   2.00856397
  0.19760000   2.01070267
  0.19760000   2.01070288
  0.19760000   2.01070072
  0.19760000   2.01069770
  0.19760000   2.01069449
  0.19760000   2.01069139
  0.19760000   2.01068851
  0.19760000   2.01068586
  0.19760000   2.01068346
  0.19760000   2.01068126
  0.19760000   2.01067926
  0.19760000   2.01067743
  0.19760000   2.01067575
  0.19760000   2.01067420
  0.19760000   2.01067276
  0.19760000   2.01067143
  0.19760000   2.01067020
  0.19760000   2.01066904
  0.19760000   2.01066796
  0.19760000   2.01066695
  0.19760000   2.01066599
  0.19760000   2.01066510
  0.19760000   2.01066425
  0.19780000   2.01278272
  0.19780000   2.01278193
  0.19780000   2.01277929
  0.19780000   2.01277604
  0.19780000   2.01277273
  0.19780000   2.01276959
  0.19780000   2.01276670
  0.19780000   2.01276406
  0.19780000   2.01276166
  0.19780000   2.01275947
  0.19780000   2.01275748
  0.19780000   2.01275566
  0.19780000   2.01275398
  0.19780000   2.01275243
  0.19780000   2.01275101
  0.19780000   2.01274968
  0.19780000   2.01274844
  0.19780000   2.01274729
  0.19780000   2.01274621
  0.19780000   2.01274520
  0.19780000   2.01274425
  0.19780000   2.01274335
  0.19780000   2.01274251
  0.19800000   2.01484078
  0.19800000   2.01483917
  0.19800000   2.01483613
  0.19800000   2.01483270
  0.19800000   2.01482932
  0.19800000   2.01482615
  0.19800000   2.01482325
  0.19800000   2.01482061
  0.19800000   2.01481822
  0.19800000   2.01481605
  0.19800000   2.01481406
  0.19800000   2.01481224
  0.19800000   2.01481057
  0.19800000   2.01480903
  0.19800000   2.01480761
  0.19800000   2.01480629
  0.19800000   2.01480505
  0.19800000   2.01480390
  0.19800000   2.01480283
  0.19800000   2.01480182
  0.19800000   2.01480087
  0.19800000   2.01479997
  0.19800000   2.01479913
  0.19820000   2.01687729
  0.19820000   2.01687499
  0.19820000   2.01687163
  0.19820000   2.01686806
  0.19820000   2.01686462
  0.19820000   2.01686144
  0.19820000   2.01685854
  0.19820000   2.01685591
  0.19820000   2.01685353
  0.19820000   2.01685136
  0.19820000   2.01684938
  0.19820000   2.01684757
  0.19820000   2.01684591
  0.19820000   2.01684437
  0.19820000   2.01684295
  0.19820000   2.01684163
  0.19820000   2.01684040
  0.19820000   2.01683925
  0.19820000   2.01683818
  0.19820000   2.01683717
  0.19820000   2.01683622
  0.19820000   2.01683533
  0.19820000   2.01683448
  0.19840000   2.01889265
  0.19840000   2.01888979
  0.19840000   2.01888618
  0.19840000   2.01888249
  0.19840000   2.01887901
  0.19840000   2.01887582
  0.19840000   2.01887293
  0.19840000   2.01887031
  0.19840000   2.01886793
  0.19840000   2.01886578
  0.19840000   2.01886381
  0.19840000   2.01886201
  0.19840000   2.01886035
  0.19840000   2.01885882
  0.19840000   2.01885740
  0.19840000   2.01885608
  0.19840000   2.01885485
  0.19840000   2.01885371
  0.19840000   2.01885263
  0.19840000   2.01885163
  0.19840000   2.01885068
  0.19840000   2.01884979
  0.19840000   2.01884894
  0.19860000   2.02088727
  0.19860000   2.02088395
  0.19860000   2.02088013
  0.19860000   2.02087637
  0.19860000   2.02087286
  0.19860000   2.02086967
  0.19860000   2.02086678
  0.19860000   2.02086417
  0.19860000   2.02086181
  0.19860000   2.02085966
  0.19860000   2.02085770
  0.19860000   2.02085590
  0.19860000   2.02085425
  0.19860000   2.02085272
  0.19860000   2.02085131
  0.19860000   2.02084999
  0.19860000   2.02084877
  0.19860000   2.02084762
  0.19860000   2.02084655
  0.19860000   2.02084555
  0.19860000   2.02084460
  0.19860000   2.02084370
  0.19860000   2.02084286
  0.19880000   2.02286154
  0.19880000   2.02285784
  0.19880000   2.02285386
  0.19880000   2.02285004
  0.19880000   2.02284651
  0.19880000   2.02284332
  0.19880000   2.02284044
  0.19880000   2.02283784
  0.19880000   2.02283549
  0.19880000   2.02283335
  0.19880000   2.02283140
  0.19880000   2.02282961
  0.19880000   2.02282796
  0.19880000   2.02282644
  0.19880000   2.02282503
  0.19880000   2.02282372
  0.19880000   2.02282249
  0.19880000   2.02282135
  0.19880000   2.02282028
  0.19880000   2.02281927
  0.19880000   2.02281833
  0.19880000   2.02281743
  0.19880000   2.02281659
  0.19900000   2.02481581
  0.19900000   2.02481181
  0.19900000   2.02480771
  0.19900000   2.02480384
  0.19900000   2.02480031
  0.19900000   2.02479712
  0.19900000   2.02479425
  0.19900000   2.02479167
  0.19900000   2.02478932
  0.19900000   2.02478719
  0.19900000   2.02478525
  0.19900000   2.02478346
  0.19900000   2.02478182
  0.19900000   2.02478030
  0.19900000   2.02477890
  0.19900000   2.02477759
  0.19900000   2.02477637
  0.19900000   2.02477522
  0.19900000   2.02477416
  0.19900000   2.02477315
  0.19900000   2.02477220
  0.19900000   2.02477131
  0.19900000   2.02477047
  0.19920000   2.02675045
  0.19920000   2.02674621
  0.19920000   2.02674202
  0.19920000   2.02673812
  0.19920000   2.02673458
  0.19920000   2.02673141
  0.19920000   2.02672855
  0.19920000   2.02672597
  0.19920000   2.02672364
  0.19920000   2.02672152
  0.19920000   2.02671958
  0.19920000   2.02671780
  0.19920000   2.02671617
  0.19920000   2.02671465
  0.19920000   2.02671325
  0.19920000   2.02671194
  0.19920000   2.02671072
  0.19920000   2.02670958
  0.19920000   2.02670851
  0.19920000   2.02670751
  0.19920000   2.02670656
  0.19920000   2.02670567
  0.19920000   2.02670483
  0.19940000   2.02866580
  0.19940000   2.02866138
  0.19940000   2.02865711
  0.19940000   2.02865319
  0.19940000   2.02864966
  0.19940000   2.02864650
  0.19940000   2.02864365
  0.19940000   2.02864109
  0.19940000   2.02863877
  0.19940000   2.02863665
  0.19940000   2.02863472
  0.19940000   2.02863295
  0.19940000   2.02863132
  0.19940000   2.02862981
  0.19940000   2.02862840
  0.19940000   2.02862710
  0.19940000   2.02862588
  0.19940000   2.02862474
  0.19940000   2.02862368
  0.19940000   2.02862267
  0.19940000   2.02862173
  0.19940000   2.02862084
  0.19940000   2.02862000
  0.19960000   2.03056221
  0.19960000   2.03055763
  0.19960000   2.03055331
  0.19960000   2.03054939
  0.19960000   2.03054587
  0.19960000   2.03054271
  0.19960000   2.03053988
  0.19960000   2.03053733
  0.19960000   2.03053502
  0.19960000   2.03053291
  0.19960000   2.03053099
  0.19960000   2.03052922
  0.19960000   2.03052759
  0.19960000   2.03052608
  0.19960000   2.03052468
  0.19960000   2.03052338
  0.19960000   2.03052217
  0.19960000   2.03052103
  0.19960000   2.03051996
  0.19960000   2.03051896
  0.19960000   2.03051802
  0.19960000   2.03051713
  0.19960000   2.03051628
  0.19980000   2.03243998
  0.19980000   2.03243529
  0.19980000   2.03243094
  0.19980000   2.03242701
  0.19980000   2.03242350
  0.19980000   2.03242036
  0.19980000   2.03241754
  0.19980000   2.03241500
  0.19980000   2.03241270
  0.19980000   2.03241060
  0.19980000   2.03240868
  0.19980000   2.03240692
  0.19980000   2.03240529
  0.19980000   2.03240379
  0.19980000   2.03240239
  0.19980000   2.03240109
  0.19980000   2.03239988
  0.19980000   2.03239874
  0.19980000   2.03239768
  0.19980000   2.03239668
  0.19980000   2.03239573
  0.19980000   2.03239484
  0.19980000   2.03239400
  0.20000000   2.03429943
  0.20000000   2.03429466
  0.20000000   2.03429029
  0.20000000   2.03428637
  0.20000000   2.03428287
  0.20000000   2.03427974
  0.20000000   2.03427694
  0.20000000   2.03427441
  0.20000000   2.03427211
  0.20000000   2.03427002
  0.20000000   2.03426811
  0.20000000   2.03426635
  0.20000000   2.03426473
  0.20000000   2.03426323
  0.20000000   2.03426184
  0.20000000   2.03426054
  0.20000000   2.03425933
  0.20000000   2.03425819
  0.20000000   2.03425713
  0.20000000   2.03425613
  0.20000000   2.03425518
  0.20000000   2.03425429
  0.20000000   2.03425345
  0.20020000   2.03614087
  0.20020000   2.03613604
  0.20020000   2.03613166
  0.20020000   2.03612775
  0.20020000   2.03612427
  0.20020000   2.03612115
  0.20020000   2.03611836
  0.20020000   2.03611584
  0.20020000   2.03611356
  0.20020000   2.03611148
  0.20020000   2.03610957
  0.20020000   2.03610782
  0.20020000   2.03610620
  0.20020000   2.03610470
  0.20020000   2.03610331
  0.20020000   2.03610201
  0.20020000   2.03610080
  0.20020000   2.03609967
  0.20020000   2.03609860
  0.20020000   2.03609760
  0.20020000   2.03609666
  0.20020000   2.03609577
  0.20020000   2.03609493
  0.20040000   2.03796460
  0.20040000   2.03795973
  0.20040000   2.03795535
  0.20040000   2.03795145
  0.20040000   2.03794798
  0.20040000   2.03794488
  0.20040000   2.03794210
  0.20040000   2.03793960
  0.20040000   2.03793732
  0.20040000   2.03793524
  0.20040000   2.03793334
  0.20040000   2.03793159
  0.20040000   2.03792998
  0.20040000   2.03792848
  0.20040000   2.03792709
  0.20040000   2.03792580
  0.20040000   2.03792459
  0.20040000   2.03792346
  0.20040000   2.03792239
  0.20040000   2.03792139
  0.20040000   2.03792045
  0.20040000   2.03791956
  0.20040000   2.03791872
  0.20060000   2.03977091
  0.20060000   2.03976601
  0.20060000   2.03976163
  0.20060000   2.03975775
  0.20060000   2.03975429
  0.20060000   2.03975121
  0.20060000   2.03974845
  0.20060000   2.03974595
  0.20060000   2.03974368
  0.20060000   2.03974161
  0.20060000   2.03973971
  0.20060000   2.03973797
  0.20060000   2.03973636
  0.20060000   2.03973487
  0.20060000   2.03973348
  0.20060000   2.03973218
  0.20060000   2.03973098
  0.20060000   2.03972984
  0.20060000   2.03972878
  0.20060000   2.03972778
  0.20060000   2.03972684
  0.20060000   2.03972595
  0.20060000   2.03972511
  0.20080000   2.04156007
  0.20080000   2.04155515
  0.20080000   2.04155078
  0.20080000   2.04154692
  0.20080000   2.04154348
  0.20080000   2.04154042
  0.20080000   2.04153766
  0.20080000   2.04153517
  0.20080000   2.04153291
  0.20080000   2.04153085
  0.20080000   2.04152896
  0.20080000   2.04152722
  0.20080000   2.04152561
  0.20080000   2.04152412
  0.20080000   2.04152273
  0.20080000   2.04152144
  0.20080000   2.04152023
  0.20080000   2.04151910
  0.20080000   2.04151804
  0.20080000   2.04151704
  0.20080000   2.04151610
  0.20080000   2.04151521
  0.20080000   2.04151437
  0.20100000   2.04333235
  0.20100000   2.04332743
  0.20100000   2.04332308
  0.20100000   2.04331923
  0.20100000   2.04331581
  0.20100000   2.04331276
  0.20100000   2.04331002
  0.20100000   2.04330754
  0.20100000   2.04330529
  0.20100000   2.04330323
  0.20100000   2.04330134
  0.20100000   2.04329961
  0.20100000   2.04329800
  0.20100000   2.04329651
  0.20100000   2.04329513
  0.20100000   2.04329384
  0.20100000   2.04329263
  0.20100000   2.04329150
  0.20100000   2.04329044
  0.20100000   2.04328944
  0.20100000   2.04328850
  0.20100000   2.04328761
  0.20100000   2.04328677
  0.20120000   2.04508803
  0.20120000   2.04508312
  0.20120000   2.04507878
  0.20120000   2.04507495
  0.20120000   2.04507155
  0.20120000   2.04506851
  0.20120000   2.04506578
  0.20120000   2.04506331
  0.20120000   2.04506107
  0.20120000   2.04505902
  0.20120000   2.04505713
  0.20120000   2.04505540
  0.20120000   2.04505380
  0.20120000   2.04505231
  0.20120000   2.04505093
  0.20120000   2.04504964
  0.20120000   2.04504843
  0.20120000   2.04504730
  0.20120000   2.04504624
  0.20120000   2.04504524
  0.20120000   2.04504430
  0.20120000   2.04504341
  0.20120000   2.04504257
  0.20140000   2.04682737
  0.20140000   2.04682246
  0.20140000   2.04681815
  0.20140000   2.04681434
  0.20140000   2.04681095
  0.20140000   2.04680793
  0.20140000   2.04680521
  0.20140000   2.04680275
  0.20140000   2.04680051
  0.20140000   2.04679846
  0.20140000   2.04679658
  0.20140000   2.04679485
  0.20140000   2.04679325
  0.20140000   2.04679177
  0.20140000   2.04679039
  0.20140000   2.04678910
  0.20140000   2.04678790
  0.20140000   2.04678677
  0.20140000   2.04678571
  0.20140000   2.04678471
  0.20140000   2.04678377
  0.20140000   2.04678288
  0.20140000   2.04678203
  0.20160000   2.04855061
  0.20160000   2.04854572
  0.20160000   2.04854143
  0.20160000   2.04853764
  0.20160000   2.04853427
  0.20160000   2.04853126
  0.20160000   2.04852855
  0.20160000   2.04852609
  0.20160000   2.04852386
  0.20160000   2.04852182
  0.20160000   2.04851995
  0.20160000   2.04851822
  0.20160000   2.04851662
  0.20160000   2.04851514
  0.20160000   2.04851376
  0.20160000   2.04851248
  0.20160000   2.04851127
  0.20160000   2.04851014
  0.20160000   2.04850908
  0.20160000   2.04850808
  0.20160000   2.04850714
  0.20160000   2.04850625
  0.20160000   2.04850541
  0.20180000   2.05025801
  0.20180000   2.05025314
  0.20180000   2.05024887
  0.20180000   2.05024510
  0.20180000   2.05024174
  0.20180000   2.05023875
  0.20180000   2.05023605
  0.20180000   2.05023360
  0.20180000   2.05023137
  0.20180000   2.05022934
  0.20180000   2.05022747
  0.20180000   2.05022575
  0.20180000   2.05022415
  0.20180000   2.05022267
  0.20180000   2.05022129
  0.20180000   2.05022001
  0.20180000   2.05021880
  0.20180000   2.05021768
  0.20180000   2.05021661
  0.20180000   2.05021562
  0.20180000   2.05021467
  0.20180000   2.05021378
  0.20180000   2.05021294
  0.20200000   2.05194981
  0.20200000   2.05194496
  0.20200000   2.05194071
  0.20200000   2.05193696
  0.20200000   2.05193362
  0.20200000   2.05193063
  0.20200000   2.05192794
  0.20200000   2.05192551
  0.20200000   2.05192329
  0.20200000   2.05192126
  0.20200000   2.05191939
  0.20200000   2.05191767
  0.20200000   2.05191608
  0.20200000   2.05191460
  0.20200000   2.05191322
  0.20200000   2.05191194
  0.20200000   2.05191073
  0.20200000   2.05190961
  0.20200000   2.05190855
  0.20200000   2.05190755
  0.20200000   2.05190660
  0.20200000   2.05190571
  0.20200000   2.05190487
  0.20220000   2.05362624
  0.20220000   2.05362142
  0.20220000   2.05361719
  0.20220000   2.05361345
  0.20220000   2.05361013
  0.20220000   2.05360716
  0.20220000   2.05360448
  0.20220000   2.05360205
  0.20220000   2.05359983
  0.20220000   2.05359781
  0.20220000   2.05359595
  0.20220000   2.05359423
  0.20220000   2.05359264
  0.20220000   2.05359116
  0.20220000   2.05358978
  0.20220000   2.05358850
  0.20220000   2.05358730
  0.20220000   2.05358617
  0.20220000   2.05358511
  0.20220000   2.05358411
  0.20220000   2.05358317
  0.20220000   2.05358228
  0.20220000   2.05358143
  0.20240000   2.05528754
  0.20240000   2.05528274
  0.20240000   2.05527853
  0.20240000   2.05527482
  0.20240000   2.05527151
  0.20240000   2.05526855
  0.20240000   2.05526588
  0.20240000   2.05526345
  0.20240000   2.05526125
  0.20240000   2.05525922
  0.20240000   2.05525736
  0.20240000   2.05525565
  0.20240000   2.05525406
  0.20240000   2.05525259
  0.20240000   2.05525121
  0.20240000   2.05524993
  0.20240000   2.05524873
  0.20240000   2.05524760
  0.20240000   2.05524654
  0.20240000   2.05524554
  0.20240000   2.05524459
  0.20240000   2.05524370
  0.20240000   2.05524286
  0.20260000   2.05693393
  0.20260000   2.05692915
  0.20260000   2.05692497
  0.20260000   2.05692127
  0.20260000   2.05691798
  0.20260000   2.05691503
  0.20260000   2.05691237
  0.20260000   2.05690995
  0.20260000   2.05690775
  0.20260000   2.05690573
  0.20260000   2.05690387
  0.20260000   2.05690216
  0.20260000   2.05690057
  0.20260000   2.05689910
  0.20260000   2.05689773
  0.20260000   2.05689644
  0.20260000   2.05689524
  0.20260000   2.05689411
  0.20260000   2.05689305
  0.20260000   2.05689205
  0.20260000   2.05689111
  0.20260000   2.05689022
  0.20260000   2.05688937
  0.20280000   2.05856563
  0.20280000   2.05856088
  0.20280000   2.05855672
  0.20280000   2.05855304
  0.20280000   2.05854976
  0.20280000   2.05854682
  0.20280000   2.05854417
  0.20280000   2.05854176
  0.20280000   2.05853956
  0.20280000   2.05853755
  0.20280000   2.05853569
  0.20280000   2.05853398
  0.20280000   2.05853240
  0.20280000   2.05853092
  0.20280000   2.05852955
  0.20280000   2.05852827
  0.20280000   2.05852707
  0.20280000   2.05852594
  0.20280000   2.05852488
  0.20280000   2.05852388
  0.20280000   2.05852294
  0.20280000   2.05852204
  0.20280000   2.05852120
  0.20300000   2.06018286
  0.20300000   2.06017814
  0.20300000   2.06017400
  0.20300000   2.06017034
  0.20300000   2.06016707
  0.20300000   2.06016414
  0.20300000   2.06016150
  0.20300000   2.06015909
  0.20300000   2.06015690
  0.20300000   2.06015489
  0.20300000   2.06015304
  0.20300000   2.06015133
  0.20300000   2.06014975
  0.20300000   2.06014828
  0.20300000   2.06014690
  0.20300000   2.06014562
  0.20300000   2.06014442
  0.20300000   2.06014329
  0.20300000   2.06014223
  0.20300000   2.06014123
  0.20300000   2.06014029
  0.20300000   2.06013940
  0.20300000   2.06013855
  0.20320000   2.06178583
  0.20320000   2.06178114
  0.20320000   2.06177702
  0.20320000   2.06177337
  0.20320000   2.06177012
  0.20320000   2.06176720
  0.20320000   2.06176456
  0.20320000   2.06176217
  0.20320000   2.06175998
  0.20320000   2.06175797
  0.20320000   2.06175612
  0.20320000   2.06175442
  0.20320000   2.06175283
  0.20320000   2.06175136
  0.20320000   2.06174999
  0.20320000   2.06174871
  0.20320000   2.06174751
  0.20320000   2.06174638
  0.20320000   2.06174532
  0.20320000   2.06174432
  0.20320000   2.06174338
  0.20320000   2.06174248
  0.20320000   2.06174164
  0.20340000   2.06337476
  0.20340000   2.06337009
  0.20340000   2.06336599
  0.20340000   2.06336236
  0.20340000   2.06335912
  0.20340000   2.06335621
  0.20340000   2.06335357
  0.20340000   2.06335118
  0.20340000   2.06334900
  0.20340000   2.06334700
  0.20340000   2.06334515
  0.20340000   2.06334345
  0.20340000   2.06334186
  0.20340000   2.06334039
  0.20340000   2.06333902
  0.20340000   2.06333774
  0.20340000   2.06333654
  0.20340000   2.06333542
  0.20340000   2.06333435
  0.20340000   2.06333335
  0.20340000   2.06333241
  0.20340000   2.06333152
  0.20340000   2.06333067
  0.20360000   2.06494983
  0.20360000   2.06494518
  0.20360000   2.06494110
  0.20360000   2.06493749
  0.20360000   2.06493426
  0.20360000   2.06493136
  0.20360000   2.06492873
  0.20360000   2.06492635
  0.20360000   2.06492417
  0.20360000   2.06492217
  0.20360000   2.06492033
  0.20360000   2.06491862
  0.20360000   2.06491704
  0.20360000   2.06491557
  0.20360000   2.06491420
  0.20360000   2.06491292
  0.20360000   2.06491172
  0.20360000   2.06491060
  0.20360000   2.06490953
  0.20360000   2.06490853
  0.20360000   2.06490759
  0.20360000   2.06490669
  0.20360000   2.06490585
  0.20380000   2.06651125
  0.20380000   2.06650663
  0.20380000   2.06650257
  0.20380000   2.06649897
  0.20380000   2.06649575
  0.20380000   2.06649286
  0.20380000   2.06649024
  0.20380000   2.06648786
  0.20380000   2.06648568
  0.20380000   2.06648369
  0.20380000   2.06648185
  0.20380000   2.06648015
  0.20380000   2.06647857
  0.20380000   2.06647710
  0.20380000   2.06647573
  0.20380000   2.06647445
  0.20380000   2.06647325
  0.20380000   2.06647212
  0.20380000   2.06647106
  0.20380000   2.06647006
  0.20380000   2.06646911
  0.20380000   2.06646822
  0.20380000   2.06646737
  0.20400000   2.06805921
  0.20400000   2.06805462
  0.20400000   2.06805058
  0.20400000   2.06804699
  0.20400000   2.06804379
  0.20400000   2.06804090
  0.20400000   2.06803829
  0.20400000   2.06803591
  0.20400000   2.06803374
  0.20400000   2.06803175
  0.20400000   2.06802991
  0.20400000   2.06802821
  0.20400000   2.06802663
  0.20400000   2.06802516
  0.20400000   2.06802380
  0.20400000   2.06802252
  0.20400000   2.06802131
  0.20400000   2.06802019
  0.20400000   2.06801913
  0.20400000   2.06801812
  0.20400000   2.06801718
  0.20400000   2.06801628
  0.20400000   2.06801543
  0.20420000   2.06959392
  0.20420000   2.06958934
  0.20420000   2.06958532
  0.20420000   2.06958175
  0.20420000   2.06957855
  0.20420000   2.06957568
  0.20420000   2.06957307
  0.20420000   2.06957070
  0.20420000   2.06956853
  0.20420000   2.06956654
  0.20420000   2.06956470
  0.20420000   2.06956300
  0.20420000   2.06956143
  0.20420000   2.06955996
  0.20420000   2.06955859
  0.20420000   2.06955731
  0.20420000   2.06955611
  0.20420000   2.06955498
  0.20420000   2.06955392
  0.20420000   2.06955292
  0.20420000   2.06955197
  0.20420000   2.06955108
  0.20420000   2.06955023
  0.20440000   2.07111554
  0.20440000   2.07111099
  0.20440000   2.07110698
  0.20440000   2.07110342
  0.20440000   2.07110024
  0.20440000   2.07109737
  0.20440000   2.07109477
  0.20440000   2.07109240
  0.20440000   2.07109024
  0.20440000   2.07108825
  0.20440000   2.07108641
  0.20440000   2.07108472
  0.20440000   2.07108314
  0.20440000   2.07108168
  0.20440000   2.07108031
  0.20440000   2.07107903
  0.20440000   2.07107783
  0.20440000   2.07107670
  0.20440000   2.07107564
  0.20440000   2.07107463
  0.20440000   2.07107369
  0.20440000   2.07107279
  0.20440000   2.07107194
  0.20460000   2.07262426
  0.20460000   2.07261974
  0.20460000   2.07261575
  0.20460000   2.07261220
  0.20460000   2.07260903
  0.20460000   2.07260616
  0.20460000   2.07260357
  0.20460000   2.07260121
  0.20460000   2.07259904
  0.20460000   2.07259706
  0.20460000   2.07259523
  0.20460000   2.07259353
  0.20460000   2.07259196
  0.20460000   2.07259049
  0.20460000   2.07258912
  0.20460000   2.07258784
  0.20460000   2.07258664
  0.20460000   2.07258551
  0.20460000   2.07258445
  0.20460000   2.07258345
  0.20460000   2.07258250
  0.20460000   2.07258160
  0.20460000   2.07258075
  0.20480000   2.07412027
  0.20480000   2.07411577
  0.20480000   2.07411179
  0.20480000   2.07410826
  0.20480000   2.07410509
  0.20480000   2.07410224
  0.20480000   2.07409965
  0.20480000   2.07409729
  0.20480000   2.07409513
  0.20480000   2.07409315
  0.20480000   2.07409132
  0.20480000   2.07408962
  0.20480000   2.07408805
  0.20480000   2.07408658
  0.20480000   2.07408522
  0.20480000   2.07408394
  0.20480000   2.07408274
  0.20480000   2.07408161
  0.20480000   2.07408054
  0.20480000   2.07407954
  0.20480000   2.07407859
  0.20480000   2.07407769
  0.20480000   2.07407684
  0.20500000   2.07560374
  0.20500000   2.07559926
  0.20500000   2.07559530
  0.20500000   2.07559178
  0.20500000   2.07558862
  0.20500000   2.07558577
  0.20500000   2.07558319
  0.20500000   2.07558083
  0.20500000   2.07557868
  0.20500000   2.07557670
  0.20500000   2.07557487
  0.20500000   2.07557317
  0.20500000   2.07557160
  0.20500000   2.07557014
  0.20500000   2.07556877
  0.20500000   2.07556749
  0.20500000   2.07556629
  0.20500000   2.07556516
  0.20500000   2.07556409
  0.20500000   2.07556309
  0.20500000   2.07556214
  0.20500000   2.07556124
  0.20500000   2.07556039
  0.20520000   2.07707485
  0.20520000   2.07707038
  0.20520000   2.07706644
  0.20520000   2.07706293
  0.20520000   2.07705978
  0.20520000   2.07705693
  0.20520000   2.07705436
  0.20520000   2.07705201
  0.20520000   2.07704985
  0.20520000   2.07704787
  0.20520000   2.07704604
  0.20520000   2.07704435
  0.20520000   2.07704278
  0.20520000   2.07704131
  0.20520000   2.07703995
  0.20520000   2.07703867
  0.20520000   2.07703746
  0.20520000   2.07703633
  0.20520000   2.07703527
  0.20520000   2.07703427
  0.20520000   2.07703332
  0.20520000   2.07703242
  0.20520000   2.07703156
  0.20540000   2.07853375
  0.20540000   2.07852930
  0.20540000   2.07852537
  0.20540000   2.07852187
  0.20540000   2.07851873
  0.20540000   2.07851590
  0.20540000   2.07851332
  0.20540000   2.07851097
  0.20540000   2.07850882
  0.20540000   2.07850685
  0.20540000   2.07850502
  0.20540000   2.07850333
  0.20540000   2.07850176
  0.20540000   2.07850029
  0.20540000   2.07849892
  0.20540000   2.07849764
  0.20540000   2.07849644
  0.20540000   2.07849531
  0.20540000   2.07849425
  0.20540000   2.07849324
  0.20540000   2.07849229
  0.20540000   2.07849139
  0.20540000   2.07849054
  0.20560000   2.07998062
  0.20560000   2.07997619
  0.20560000   2.07997227
  0.20560000   2.07996878
  0.20560000   2.07996565
  0.20560000   2.07996282
  0.20560000   2.07996025
  0.20560000   2.07995791
  0.20560000   2.07995576
  0.20560000   2.07995378
  0.20560000   2.07995196
  0.20560000   2.07995027
  0.20560000   2.07994870
  0.20560000   2.07994723
  0.20560000   2.07994586
  0.20560000   2.07994458
  0.20560000   2.07994338
  0.20560000   2.07994225
  0.20560000   2.07994118
  0.20560000   2.07994018
  0.20560000   2.07993923
  0.20560000   2.07993833
  0.20560000   2.07993747
  0.20580000   2.08141561
  0.20580000   2.08141120
  0.20580000   2.08140730
  0.20580000   2.08140382
  0.20580000   2.08140070
  0.20580000   2.08139787
  0.20580000   2.08139531
  0.20580000   2.08139297
  0.20580000   2.08139082
  0.20580000   2.08138885
  0.20580000   2.08138702
  0.20580000   2.08138533
  0.20580000   2.08138376
  0.20580000   2.08138230
  0.20580000   2.08138093
  0.20580000   2.08137965
  0.20580000   2.08137845
  0.20580000   2.08137731
  0.20580000   2.08137625
  0.20580000   2.08137524
  0.20580000   2.08137429
  0.20580000   2.08137339
  0.20580000   2.08137253
  0.20600000   2.08283890
  0.20600000   2.08283451
  0.20600000   2.08283062
  0.20600000   2.08282715
  0.20600000   2.08282403
  0.20600000   2.08282121
  0.20600000   2.08281865
  0.20600000   2.08281631
  0.20600000   2.08281417
  0.20600000   2.08281219
  0.20600000   2.08281037
  0.20600000   2.08280868
  0.20600000   2.08280711
  0.20600000   2.08280565
  0.20600000   2.08280428
  0.20600000   2.08280300
  0.20600000   2.08280180
  0.20600000   2.08280066
  0.20600000   2.08279960
  0.20600000   2.08279859
  0.20600000   2.08279764
  0.20600000   2.08279673
  0.20600000   2.08279588
  0.20620000   2.08425063
  0.20620000   2.08424625
  0.20620000   2.08424238
  0.20620000   2.08423891
  0.20620000   2.08423580
  0.20620000   2.08423299
  0.20620000   2.08423043
  0.20620000   2.08422810
  0.20620000   2.08422596
  0.20620000   2.08422399
  0.20620000   2.08422216
  0.20620000   2.08422047
  0.20620000   2.08421890
  0.20620000   2.08421744
  0.20620000   2.08421607
  0.20620000   2.08421479
  0.20620000   2.08421359
  0.20620000   2.08421245
  0.20620000   2.08421139
  0.20620000   2.08421038
  0.20620000   2.08420943
  0.20620000   2.08420852
  0.20620000   2.08420766
  0.20640000   2.08565096
  0.20640000   2.08564660
  0.20640000   2.08564273
  0.20640000   2.08563928
  0.20640000   2.08563617
  0.20640000   2.08563337
  0.20640000   2.08563081
  0.20640000   2.08562848
  0.20640000   2.08562634
  0.20640000   2.08562437
  0.20640000   2.08562255
  0.20640000   2.08562086
  0.20640000   2.08561929
  0.20640000   2.08561783
  0.20640000   2.08561646
  0.20640000   2.08561518
  0.20640000   2.08561397
  0.20640000   2.08561284
  0.20640000   2.08561177
  0.20640000   2.08561076
  0.20640000   2.08560981
  0.20640000   2.08560890
  0.20640000   2.08560805
  0.20660000   2.08704003
  0.20660000   2.08703569
  0.20660000   2.08703183
  0.20660000   2.08702839
  0.20660000   2.08702529
  0.20660000   2.08702249
  0.20660000   2.08701994
  0.20660000   2.08701761
  0.20660000   2.08701547
  0.20660000   2.08701350
  0.20660000   2.08701168
  0.20660000   2.08701000
  0.20660000   2.08700843
  0.20660000   2.08700696
  0.20660000   2.08700559
  0.20660000   2.08700431
  0.20660000   2.08700311
  0.20660000   2.08700197
  0.20660000   2.08700090
  0.20660000   2.08699989
  0.20660000   2.08699894
  0.20660000   2.08699803
  0.20660000   2.08699717
  0.20680000   2.08841801
  0.20680000   2.08841368
  0.20680000   2.08840983
  0.20680000   2.08840640
  0.20680000   2.08840331
  0.20680000   2.08840051
  0.20680000   2.08839796
  0.20680000   2.08839563
  0.20680000   2.08839350
  0.20680000   2.08839153
  0.20680000   2.08838971
  0.20680000   2.08838802
  0.20680000   2.08838645
  0.20680000   2.08838499
  0.20680000   2.08838362
  0.20680000   2.08838234
  0.20680000   2.08838113
  0.20680000   2.08838000
  0.20680000   2.08837893
  0.20680000   2.08837792
  0.20680000   2.08837696
  0.20680000   2.08837605
  0.20680000   2.08837519
  0.20700000   2.08978502
  0.20700000   2.08978070
  0.20700000   2.08977687
  0.20700000   2.08977344
  0.20700000   2.08977036
  0.20700000   2.08976756
  0.20700000   2.08976502
  0.20700000   2.08976269
  0.20700000   2.08976056
  0.20700000   2.08975859
  0.20700000   2.08975677
  0.20700000   2.08975509
  0.20700000   2.08975352
  0.20700000   2.08975205
  0.20700000   2.08975068
  0.20700000   2.08974940
  0.20700000   2.08974819
  0.20700000   2.08974706
  0.20700000   2.08974599
  0.20700000   2.08974498
  0.20700000   2.08974402
  0.20700000   2.08974311
  0.20700000   2.08974225
  0.20720000   2.09114122
  0.20720000   2.09113691
  0.20720000   2.09113309
  0.20720000   2.09112967
  0.20720000   2.09112659
  0.20720000   2.09112380
  0.20720000   2.09112126
  0.20720000   2.09111894
  0.20720000   2.09111680
  0.20720000   2.09111484
  0.20720000   2.09111302
  0.20720000   2.09111133
  0.20720000   2.09110976
  0.20720000   2.09110830
  0.20720000   2.09110693
  0.20720000   2.09110564
  0.20720000   2.09110444
  0.20720000   2.09110330
  0.20720000   2.09110223
  0.20720000   2.09110122
  0.20720000   2.09110026
  0.20720000   2.09109935
  0.20720000   2.09109849
  0.20740000   2.09248673
  0.20740000   2.09248244
  0.20740000   2.09247863
  0.20740000   2.09247522
  0.20740000   2.09247214
  0.20740000   2.09246936
  0.20740000   2.09246682
  0.20740000   2.09246450
  0.20740000   2.09246237
  0.20740000   2.09246040
  0.20740000   2.09245859
  0.20740000   2.09245690
  0.20740000   2.09245533
  0.20740000   2.09245386
  0.20740000   2.09245249
  0.20740000   2.09245121
  0.20740000   2.09245000
  0.20740000   2.09244887
  0.20740000   2.09244779
  0.20740000   2.09244678
  0.20740000   2.09244582
  0.20740000   2.09244491
  0.20740000   2.09244405
  0.20760000   2.09382171
  0.20760000   2.09381743
  0.20760000   2.09381363
  0.20760000   2.09381023
  0.20760000   2.09380716
  0.20760000   2.09380437
  0.20760000   2.09380184
  0.20760000   2.09379952
  0.20760000   2.09379739
  0.20760000   2.09379543
  0.20760000   2.09379361
  0.20760000   2.09379192
  0.20760000   2.09379035
  0.20760000   2.09378889
  0.20760000   2.09378752
  0.20760000   2.09378623
  0.20760000   2.09378502
  0.20760000   2.09378389
  0.20760000   2.09378281
  0.20760000   2.09378180
  0.20760000   2.09378084
  0.20760000   2.09377993
  0.20760000   2.09377907
  0.20780000   2.09514628
  0.20780000   2.09514202
  0.20780000   2.09513823
  0.20780000   2.09513483
  0.20780000   2.09513176
  0.20780000   2.09512898
  0.20780000   2.09512645
  0.20780000   2.09512413
  0.20780000   2.09512201
  0.20780000   2.09512004
  0.20780000   2.09511823
  0.20780000   2.09511654
  0.20780000   2.09511497
  0.20780000   2.09511350
  0.20780000   2.09511213
  0.20780000   2.09511085
  0.20780000   2.09510964
  0.20780000   2.09510850
  0.20780000   2.09510743
  0.20780000   2.09510641
  0.20780000   2.09510545
  0.20780000   2.09510454
  0.20780000   2.09510367
  0.20800000   2.09646058
  0.20800000   2.09645633
  0.20800000   2.09645254
  0.20800000   2.09644915
  0.20800000   2.09644609
  0.20800000   2.09644332
  0.20800000   2.09644079
  0.20800000   2.09643847
  0.20800000   2.09643634
  0.20800000   2.09643438
  0.20800000   2.09643257
  0.20800000   2.09643088
  0.20800000   2.09642931
  0.20800000   2.09642784
  0.20800000   2.09642647
  0.20800000   2.09642518
  0.20800000   2.09642397
  0.20800000   2.09642284
  0.20800000   2.09642176
  0.20800000   2.09642075
  0.20800000   2.09641978
  0.20800000   2.09641887
  0.20800000   2.09641801
  0.20820000   2.09776474
  0.20820000   2.09776050
  0.20820000   2.09775672
  0.20820000   2.09775333
  0.20820000   2.09775028
  0.20820000   2.09774751
  0.20820000   2.09774498
  0.20820000   2.09774267
  0.20820000   2.09774054
  0.20820000   2.09773858
  0.20820000   2.09773676
  0.20820000   2.09773507
  0.20820000   2.09773350
  0.20820000   2.09773204
  0.20820000   2.09773066
  0.20820000   2.09772938
  0.20820000   2.09772817
  0.20820000   2.09772703
  0.20820000   2.09772595
  0.20820000   2.09772493
  0.20820000   2.09772397
  0.20820000   2.09772306
  0.20820000   2.09772219
  0.20840000   2.09905887
  0.20840000   2.09905464
  0.20840000   2.09905088
  0.20840000   2.09904749
  0.20840000   2.09904444
  0.20840000   2.09904168
  0.20840000   2.09903915
  0.20840000   2.09903684
  0.20840000   2.09903471
  0.20840000   2.09903275
  0.20840000   2.09903094
  0.20840000   2.09902925
  0.20840000   2.09902768
  0.20840000   2.09902621
  0.20840000   2.09902484
  0.20840000   2.09902355
  0.20840000   2.09902234
  0.20840000   2.09902120
  0.20840000   2.09902012
  0.20840000   2.09901910
  0.20840000   2.09901814
  0.20840000   2.09901723
  0.20840000   2.09901636
  0.20860000   2.10034312
  0.20860000   2.10033890
  0.20860000   2.10033514
  0.20860000   2.10033176
  0.20860000   2.10032872
  0.20860000   2.10032595
  0.20860000   2.10032343
  0.20860000   2.10032112
  0.20860000   2.10031900
  0.20860000   2.10031703
  0.20860000   2.10031522
  0.20860000   2.10031353
  0.20860000   2.10031196
  0.20860000   2.10031049
  0.20860000   2.10030912
  0.20860000   2.10030783
  0.20860000   2.10030662
  0.20860000   2.10030548
  0.20860000   2.10030440
  0.20860000   2.10030338
  0.20860000   2.10030242
  0.20860000   2.10030150
  0.20860000   2.10030063
  0.20880000   2.10161760
  0.20880000   2.10161339
  0.20880000   2.10160963
  0.20880000   2.10160627
  0.20880000   2.10160322
  0.20880000   2.10160046
  0.20880000   2.10159794
  0.20880000   2.10159563
  0.20880000   2.10159351
  0.20880000   2.10159155
  0.20880000   2.10158973
  0.20880000   2.10158804
  0.20880000   2.10158647
  0.20880000   2.10158500
  0.20880000   2.10158363
  0.20880000   2.10158234
  0.20880000   2.10158113
  0.20880000   2.10157998
  0.20880000   2.10157890
  0.20880000   2.10157789
  0.20880000   2.10157692
  0.20880000   2.10157600
  0.20880000   2.10157513
  0.20900000   2.10288243
  0.20900000   2.10287823
  0.20900000   2.10287448
  0.20900000   2.10287112
  0.20900000   2.10286808
  0.20900000   2.10286532
  0.20900000   2.10286280
  0.20900000   2.10286049
  0.20900000   2.10285837
  0.20900000   2.10285641
  0.20900000   2.10285459
  0.20900000   2.10285291
  0.20900000   2.10285133
  0.20900000   2.10284986
  0.20900000   2.10284849
  0.20900000   2.10284720
  0.20900000   2.10284598
  0.20900000   2.10284484
  0.20900000   2.10284376
  0.20900000   2.10284274
  0.20900000   2.10284177
  0.20900000   2.10284086
  0.20900000   2.10283999
  0.20920000   2.10413773
  0.20920000   2.10413354
  0.20920000   2.10412980
  0.20920000   2.10412644
  0.20920000   2.10412340
  0.20920000   2.10412065
  0.20920000   2.10411813
  0.20920000   2.10411582
  0.20920000   2.10411370
  0.20920000   2.10411174
  0.20920000   2.10410992
  0.20920000   2.10410824
  0.20920000   2.10410666
  0.20920000   2.10410519
  0.20920000   2.10410382
  0.20920000   2.10410253
  0.20920000   2.10410131
  0.20920000   2.10410017
  0.20920000   2.10409909
  0.20920000   2.10409807
  0.20920000   2.10409710
  0.20920000   2.10409618
  0.20920000   2.10409531
  0.20940000   2.10538362
  0.20940000   2.10537943
  0.20940000   2.10537570
  0.20940000   2.10537235
  0.20940000   2.10536932
  0.20940000   2.10536656
  0.20940000   2.10536405
  0.20940000   2.10536174
  0.20940000   2.10535962
  0.20940000   2.10535766
  0.20940000   2.10535584
  0.20940000   2.10535415
  0.20940000   2.10535258
  0.20940000   2.10535111
  0.20940000   2.10534973
  0.20940000   2.10534844
  0.20940000   2.10534723
  0.20940000   2.10534608
  0.20940000   2.10534500
  0.20940000   2.10534398
  0.20940000   2.10534301
  0.20940000   2.10534209
  0.20940000   2.10534122
  0.20960000   2.10662021
  0.20960000   2.10661603
  0.20960000   2.10661231
  0.20960000   2.10660896
  0.20960000   2.10660593
  0.20960000   2.10660318
  0.20960000   2.10660066
  0.20960000   2.10659836
  0.20960000   2.10659624
  0.20960000   2.10659428
  0.20960000   2.10659246
  0.20960000   2.10659077
  0.20960000   2.10658920
  0.20960000   2.10658773
  0.20960000   2.10658635
  0.20960000   2.10658506
  0.20960000   2.10658384
  0.20960000   2.10658269
  0.20960000   2.10658161
  0.20960000   2.10658059
  0.20960000   2.10657962
  0.20960000   2.10657870
  0.20960000   2.10657782
  0.20980000   2.10784761
  0.20980000   2.10784345
  0.20980000   2.10783973
  0.20980000   2.10783638
  0.20980000   2.10783336
  0.20980000   2.10783061
  0.20980000   2.10782809
  0.20980000   2.10782579
  0.20980000   2.10782367
  0.20980000   2.10782171
  0.20980000   2.10781989
  0.20980000   2.10781820
  0.20980000   2.10781663
  0.20980000   2.10781516
  0.20980000   2.10781378
  0.20980000   2.10781248
  0.20980000   2.10781127
  0.20980000   2.10781012
  0.20980000   2.10780904
  0.20980000   2.10780801
  0.20980000   2.10780704
  0.20980000   2.10780612
  0.20980000   2.10780524
  0.21000000   2.10906594
  0.21000000   2.10906178
  0.21000000   2.10905807
  0.21000000   2.10905473
  0.21000000   2.10905171
  0.21000000   2.10904896
  0.21000000   2.10904645
  0.21000000   2.10904415
  0.21000000   2.10904202
  0.21000000   2.10904006
  0.21000000   2.10903825
  0.21000000   2.10903656
  0.21000000   2.10903498
  0.21000000   2.10903351
  0.21000000   2.10903213
  0.21000000   2.10903084
  0.21000000   2.10902962
  0.21000000   2.10902847
  0.21000000   2.10902738
  0.21000000   2.10902636
  0.21000000   2.10902539
  0.21000000   2.10902446
  0.21000000   2.10902359
  0.21020000   2.11027530
  0.21020000   2.11027115
  0.21020000   2.11026745
  0.21020000   2.11026411
  0.21020000   2.11026109
  0.21020000   2.11025835
  0.21020000   2.11025584
  0.21020000   2.11025353
  0.21020000   2.11025141
  0.21020000   2.11024945
  0.21020000   2.11024764
  0.21020000   2.11024595
  0.21020000   2.11024437
  0.21020000   2.11024290
  0.21020000   2.11024152
  0.21020000   2.11024022
  0.21020000   2.11023900
  0.21020000   2.11023785
  0.21020000   2.11023677
  0.21020000   2.11023574
  0.21020000   2.11023477
  0.21020000   2.11023384
  0.21020000   2.11023296
  0.21040000   2.11147581
  0.21040000   2.11147167
  0.21040000   2.11146796
  0.21040000   2.11146463
  0.21040000   2.11146161
  0.21040000   2.11145887
  0.21040000   2.11145636
  0.21040000   2.11145406
  0.21040000   2.11145194
  0.21040000   2.11144998
  0.21040000   2.11144816
  0.21040000   2.11144647
  0.21040000   2.11144490
  0.21040000   2.11144342
  0.21040000   2.11144204
  0.21040000   2.11144074
  0.21040000   2.11143952
  0.21040000   2.11143837
  0.21040000   2.11143729
  0.21040000   2.11143626
  0.21040000   2.11143528
  0.21040000   2.11143436
  0.21040000   2.11143348
  0.21060000   2.11266756
  0.21060000   2.11266342
  0.21060000   2.11265973
  0.21060000   2.11265640
  0.21060000   2.11265338
  0.21060000   2.11265064
  0.21060000   2.11264813
  0.21060000   2.11264583
  0.21060000   2.11264371
  0.21060000   2.11264175
  0.21060000   2.11263993
  0.21060000   2.11263824
  0.21060000   2.11263667
  0.21060000   2.11263519
  0.21060000   2.11263381
  0.21060000   2.11263251
  0.21060000   2.11263129
  0.21060000   2.11263014
  0.21060000   2.11262905
  0.21060000   2.11262802
  0.21060000   2.11262704
  0.21060000   2.11262612
  0.21060000   2.11262524
  0.21080000   2.11385066
  0.21080000   2.11384653
  0.21080000   2.11384284
  0.21080000   2.11383951
  0.21080000   2.11383650
  0.21080000   2.11383376
  0.21080000   2.11383125
  0.21080000   2.11382895
  0.21080000   2.11382683
  0.21080000   2.11382487
  0.21080000   2.11382305
  0.21080000   2.11382136
  0.21080000   2.11381978
  0.21080000   2.11381831
  0.21080000   2.11381693
  0.21080000   2.11381563
  0.21080000   2.11381440
  0.21080000   2.11381325
  0.21080000   2.11381216
  0.21080000   2.11381113
  0.21080000   2.11381015
  0.21080000   2.11380923
  0.21080000   2.11380835
  0.21100000   2.11502521
  0.21100000   2.11502109
  0.21100000   2.11501740
  0.21100000   2.11501408
  0.21100000   2.11501107
  0.21100000   2.11500833
  0.21100000   2.11500582
  0.21100000   2.11500352
  0.21100000   2.11500140
  0.21100000   2.11499944
  0.21100000   2.11499762
  0.21100000   2.11499593
  0.21100000   2.11499435
  0.21100000   2.11499288
  0.21100000   2.11499149
  0.21100000   2.11499019
  0.21100000   2.11498897
  0.21100000   2.11498781
  0.21100000   2.11498672
  0.21100000   2.11498569
  0.21100000   2.11498471
  0.21100000   2.11498379
  0.21100000   2.11498291
  0.21120000   2.11619131
  0.21120000   2.11618719
  0.21120000   2.11618351
  0.21120000   2.11618019
  0.21120000   2.11617719
  0.21120000   2.11617445
  0.21120000   2.11617194
  0.21120000   2.11616964
  0.21120000   2.11616752
  0.21120000   2.11616556
  0.21120000   2.11616374
  0.21120000   2.11616205
  0.21120000   2.11616047
  0.21120000   2.11615899
  0.21120000   2.11615761
  0.21120000   2.11615631
  0.21120000   2.11615508
  0.21120000   2.11615393
  0.21120000   2.11615283
  0.21120000   2.11615180
  0.21120000   2.11615082
  0.21120000   2.11614989
  0.21120000   2.11614901
  0.21140000   2.11734906
  0.21140000   2.11734495
  0.21140000   2.11734127
  0.21140000   2.11733796
  0.21140000   2.11733495
  0.21140000   2.11733222
  0.21140000   2.11732971
  0.21140000   2.11732741
  0.21140000   2.11732529
  0.21140000   2.11732333
  0.21140000   2.11732151
  0.21140000   2.11731982
  0.21140000   2.11731824
  0.21140000   2.11731676
  0.21140000   2.11731537
  0.21140000   2.11731407
  0.21140000   2.11731284
  0.21140000   2.11731169
  0.21140000   2.11731059
  0.21140000   2.11730956
  0.21140000   2.11730858
  0.21140000   2.11730765
  0.21140000   2.11730677
  0.21160000   2.11849855
  0.21160000   2.11849445
  0.21160000   2.11849078
  0.21160000   2.11848747
  0.21160000   2.11848446
  0.21160000   2.11848173
  0.21160000   2.11847923
  0.21160000   2.11847693
  0.21160000   2.11847480
  0.21160000   2.11847284
  0.21160000   2.11847102
  0.21160000   2.11846933
  0.21160000   2.11846775
  0.21160000   2.11846627
  0.21160000   2.11846488
  0.21160000   2.11846358
  0.21160000   2.11846235
  0.21160000   2.11846119
  0.21160000   2.11846010
  0.21160000   2.11845906
  0.21160000   2.11845808
  0.21160000   2.11845715
  0.21160000   2.11845626
  0.21180000   2.11963989
  0.21180000   2.11963579
  0.21180000   2.11963212
  0.21180000   2.11962882
  0.21180000   2.11962581
  0.21180000   2.11962308
  0.21180000   2.11962058
  0.21180000   2.11961828
  0.21180000   2.11961616
  0.21180000   2.11961420
  0.21180000   2.11961237
  0.21180000   2.11961068
  0.21180000   2.11960910
  0.21180000   2.11960761
  0.21180000   2.11960623
  0.21180000   2.11960492
  0.21180000   2.11960369
  0.21180000   2.11960253
  0.21180000   2.11960144
  0.21180000   2.11960040
  0.21180000   2.11959942
  0.21180000   2.11959849
  0.21180000   2.11959760
  0.21200000   2.12077316
  0.21200000   2.12076907
  0.21200000   2.12076540
  0.21200000   2.12076210
  0.21200000   2.12075910
  0.21200000   2.12075637
  0.21200000   2.12075386
  0.21200000   2.12075156
  0.21200000   2.12074944
  0.21200000   2.12074748
  0.21200000   2.12074566
  0.21200000   2.12074396
  0.21200000   2.12074238
  0.21200000   2.12074090
  0.21200000   2.12073951
  0.21200000   2.12073820
  0.21200000   2.12073697
  0.21200000   2.12073581
  0.21200000   2.12073472
  0.21200000   2.12073368
  0.21200000   2.12073270
  0.21200000   2.12073176
  0.21200000   2.12073087
  0.21220000   2.12189846
  0.21220000   2.12189437
  0.21220000   2.12189071
  0.21220000   2.12188741
  0.21220000   2.12188441
  0.21220000   2.12188168
  0.21220000   2.12187918
  0.21220000   2.12187688
  0.21220000   2.12187476
  0.21220000   2.12187279
  0.21220000   2.12187097
  0.21220000   2.12186927
  0.21220000   2.12186769
  0.21220000   2.12186620
  0.21220000   2.12186481
  0.21220000   2.12186351
  0.21220000   2.12186228
  0.21220000   2.12186111
  0.21220000   2.12186002
  0.21220000   2.12185898
  0.21220000   2.12185799
  0.21220000   2.12185706
  0.21220000   2.12185617
  0.21240000   2.12301587
  0.21240000   2.12301179
  0.21240000   2.12300813
  0.21240000   2.12300483
  0.21240000   2.12300184
  0.21240000   2.12299911
  0.21240000   2.12299660
  0.21240000   2.12299430
  0.21240000   2.12299218
  0.21240000   2.12299022
  0.21240000   2.12298839
  0.21240000   2.12298670
  0.21240000   2.12298511
  0.21240000   2.12298363
  0.21240000   2.12298224
  0.21240000   2.12298093
  0.21240000   2.12297970
  0.21240000   2.12297853
  0.21240000   2.12297743
  0.21240000   2.12297639
  0.21240000   2.12297541
  0.21240000   2.12297447
  0.21240000   2.12297358
  0.21260000   2.12412549
  0.21260000   2.12412142
  0.21260000   2.12411776
  0.21260000   2.12411446
  0.21260000   2.12411147
  0.21260000   2.12410874
  0.21260000   2.12410624
  0.21260000   2.12410394
  0.21260000   2.12410182
  0.21260000   2.12409985
  0.21260000   2.12409803
  0.21260000   2.12409633
  0.21260000   2.12409474
  0.21260000   2.12409326
  0.21260000   2.12409186
  0.21260000   2.12409055
  0.21260000   2.12408932
  0.21260000   2.12408816
  0.21260000   2.12408706
  0.21260000   2.12408602
  0.21260000   2.12408503
  0.21260000   2.12408409
  0.21260000   2.12408320
  0.21280000   2.12522740
  0.21280000   2.12522334
  0.21280000   2.12521968
  0.21280000   2.12521639
  0.21280000   2.12521339
  0.21280000   2.12521066
  0.21280000   2.12520816
  0.21280000   2.12520586
  0.21280000   2.12520374
  0.21280000   2.12520177
  0.21280000   2.12519995
  0.21280000   2.12519825
  0.21280000   2.12519666
  0.21280000   2.12519518
  0.21280000   2.12519378
  0.21280000   2.12519247
  0.21280000   2.12519124
  0.21280000   2.12519007
  0.21280000   2.12518897
  0.21280000   2.12518793
  0.21280000   2.12518694
  0.21280000   2.12518600
  0.21280000   2.12518511
  0.21300000   2.12632170
  0.21300000   2.12631763
  0.21300000   2.12631398
  0.21300000   2.12631069
  0.21300000   2.12630770
  0.21300000   2.12630497
  0.21300000   2.12630247
  0.21300000   2.12630017
  0.21300000   2.12629804
  0.21300000   2.12629608
  0.21300000   2.12629425
  0.21300000   2.12629255
  0.21300000   2.12629096
  0.21300000   2.12628947
  0.21300000   2.12628808
  0.21300000   2.12628677
  0.21300000   2.12628553
  0.21300000   2.12628437
  0.21300000   2.12628326
  0.21300000   2.12628222
  0.21300000   2.12628123
  0.21300000   2.12628029
  0.21300000   2.12627940
  0.21320000   2.12740845
  0.21320000   2.12740440
  0.21320000   2.12740075
  0.21320000   2.12739746
  0.21320000   2.12739447
  0.21320000   2.12739174
  0.21320000   2.12738924
  0.21320000   2.12738694
  0.21320000   2.12738481
  0.21320000   2.12738285
  0.21320000   2.12738102
  0.21320000   2.12737932
  0.21320000   2.12737773
  0.21320000   2.12737624
  0.21320000   2.12737484
  0.21320000   2.12737353
  0.21320000   2.12737229
  0.21320000   2.12737112
  0.21320000   2.12737002
  0.21320000   2.12736898
  0.21320000   2.12736799
  0.21320000   2.12736704
  0.21320000   2.12736615
  0.21340000   2.12848776
  0.21340000   2.12848371
  0.21340000   2.12848006
  0.21340000   2.12847677
  0.21340000   2.12847378
  0.21340000   2.12847105
  0.21340000   2.12846855
  0.21340000   2.12846625
  0.21340000   2.12846413
  0.21340000   2.12846216
  0.21340000   2.12846033
  0.21340000   2.12845863
  0.21340000   2.12845704
  0.21340000   2.12845555
  0.21340000   2.12845415
  0.21340000   2.12845284
  0.21340000   2.12845160
  0.21340000   2.12845043
  0.21340000   2.12844933
  0.21340000   2.12844828
  0.21340000   2.12844729
  0.21340000   2.12844634
  0.21340000   2.12844545
  0.21360000   2.12955970
  0.21360000   2.12955565
  0.21360000   2.12955201
  0.21360000   2.12954872
  0.21360000   2.12954573
  0.21360000   2.12954300
  0.21360000   2.12954050
  0.21360000   2.12953820
  0.21360000   2.12953607
  0.21360000   2.12953411
  0.21360000   2.12953228
  0.21360000   2.12953057
  0.21360000   2.12952898
  0.21360000   2.12952749
  0.21360000   2.12952609
  0.21360000   2.12952477
  0.21360000   2.12952353
  0.21360000   2.12952236
  0.21360000   2.12952126
  0.21360000   2.12952021
  0.21360000   2.12951922
  0.21360000   2.12951827
  0.21360000   2.12951738
  0.21380000   2.13062434
  0.21380000   2.13062030
  0.21380000   2.13061666
  0.21380000   2.13061337
  0.21380000   2.13061039
  0.21380000   2.13060766
  0.21380000   2.13060516
  0.21380000   2.13060286
  0.21380000   2.13060073
  0.21380000   2.13059876
  0.21380000   2.13059693
  0.21380000   2.13059522
  0.21380000   2.13059363
  0.21380000   2.13059214
  0.21380000   2.13059074
  0.21380000   2.13058942
  0.21380000   2.13058818
  0.21380000   2.13058701
  0.21380000   2.13058590
  0.21380000   2.13058485
  0.21380000   2.13058386
  0.21380000   2.13058291
  0.21380000   2.13058202
  0.21400000   2.13168178
  0.21400000   2.13167774
  0.21400000   2.13167411
  0.21400000   2.13167082
  0.21400000   2.13166783
  0.21400000   2.13166511
  0.21400000   2.13166261
  0.21400000   2.13166030
  0.21400000   2.13165818
  0.21400000   2.13165621
  0.21400000   2.13165438
  0.21400000   2.13165267
  0.21400000   2.13165107
  0.21400000   2.13164958
  0.21400000   2.13164818
  0.21400000   2.13164686
  0.21400000   2.13164562
  0.21400000   2.13164445
  0.21400000   2.13164334
  0.21400000   2.13164229
  0.21400000   2.13164129
  0.21400000   2.13164035
  0.21400000   2.13163945
  0.21420000   2.13273209
  0.21420000   2.13272805
  0.21420000   2.13272442
  0.21420000   2.13272114
  0.21420000   2.13271815
  0.21420000   2.13271542
  0.21420000   2.13271292
  0.21420000   2.13271062
  0.21420000   2.13270849
  0.21420000   2.13270652
  0.21420000   2.13270469
  0.21420000   2.13270298
  0.21420000   2.13270139
  0.21420000   2.13269989
  0.21420000   2.13269849
  0.21420000   2.13269717
  0.21420000   2.13269592
  0.21420000   2.13269475
  0.21420000   2.13269364
  0.21420000   2.13269259
  0.21420000   2.13269159
  0.21420000   2.13269064
  0.21420000   2.13268974
  0.21440000   2.13377535
  0.21440000   2.13377131
  0.21440000   2.13376768
  0.21440000   2.13376440
  0.21440000   2.13376141
  0.21440000   2.13375869
  0.21440000   2.13375619
  0.21440000   2.13375388
  0.21440000   2.13375175
  0.21440000   2.13374978
  0.21440000   2.13374795
  0.21440000   2.13374624
  0.21440000   2.13374464
  0.21440000   2.13374315
  0.21440000   2.13374174
  0.21440000   2.13374042
  0.21440000   2.13373918
  0.21440000   2.13373800
  0.21440000   2.13373689
  0.21440000   2.13373584
  0.21440000   2.13373484
  0.21440000   2.13373389
  0.21440000   2.13373299
  0.21460000   2.13481163
  0.21460000   2.13480760
  0.21460000   2.13480397
  0.21460000   2.13480068
  0.21460000   2.13479770
  0.21460000   2.13479497
  0.21460000   2.13479247
  0.21460000   2.13479017
  0.21460000   2.13478804
  0.21460000   2.13478607
  0.21460000   2.13478423
  0.21460000   2.13478252
  0.21460000   2.13478092
  0.21460000   2.13477942
  0.21460000   2.13477802
  0.21460000   2.13477670
  0.21460000   2.13477545
  0.21460000   2.13477427
  0.21460000   2.13477316
  0.21460000   2.13477211
  0.21460000   2.13477111
  0.21460000   2.13477016
  0.21460000   2.13476925
  0.21480000   2.13584100
  0.21480000   2.13583697
  0.21480000   2.13583335
  0.21480000   2.13583007
  0.21480000   2.13582708
  0.21480000   2.13582436
  0.21480000   2.13582185
  0.21480000   2.13581955
  0.21480000   2.13581742
  0.21480000   2.13581545
  0.21480000   2.13581361
  0.21480000   2.13581190
  0.21480000   2.13581030
  0.21480000   2.13580880
  0.21480000   2.13580739
  0.21480000   2.13580607
  0.21480000   2.13580482
  0.21480000   2.13580364
  0.21480000   2.13580253
  0.21480000   2.13580148
  0.21480000   2.13580047
  0.21480000   2.13579952
  0.21480000   2.13579862
  0.21500000   2.13686355
  0.21500000   2.13685953
  0.21500000   2.13685590
  0.21500000   2.13685262
  0.21500000   2.13684964
  0.21500000   2.13684691
  0.21500000   2.13684441
  0.21500000   2.13684210
  0.21500000   2.13683997
  0.21500000   2.13683800
  0.21500000   2.13683616
  0.21500000   2.13683445
  0.21500000   2.13683285
  0.21500000   2.13683135
  0.21500000   2.13682994
  0.21500000   2.13682861
  0.21500000   2.13682736
  0.21500000   2.13682619
  0.21500000   2.13682507
  0.21500000   2.13682401
  0.21500000   2.13682301
  0.21500000   2.13682206
  0.21500000   2.13682115
  0.21520000   2.13787935
  0.21520000   2.13787532
  0.21520000   2.13787170
  0.21520000   2.13786842
  0.21520000   2.13786544
  0.21520000   2.13786271
  0.21520000   2.13786021
  0.21520000   2.13785790
  0.21520000   2.13785577
  0.21520000   2.13785379
  0.21520000   2.13785195
  0.21520000   2.13785024
  0.21520000   2.13784864
  0.21520000   2.13784714
  0.21520000   2.13784573
  0.21520000   2.13784440
  0.21520000   2.13784315
  0.21520000   2.13784197
  0.21520000   2.13784085
  0.21520000   2.13783980
  0.21520000   2.13783879
  0.21520000   2.13783784
  0.21520000   2.13783693
  0.21540000   2.13888845
  0.21540000   2.13888443
  0.21540000   2.13888081
  0.21540000   2.13887754
  0.21540000   2.13887455
  0.21540000   2.13887182
  0.21540000   2.13886932
  0.21540000   2.13886701
  0.21540000   2.13886488
  0.21540000   2.13886290
  0.21540000   2.13886106
  0.21540000   2.13885935
  0.21540000   2.13885775
  0.21540000   2.13885624
  0.21540000   2.13885483
  0.21540000   2.13885350
  0.21540000   2.13885225
  0.21540000   2.13885107
  0.21540000   2.13884995
  0.21540000   2.13884889
  0.21540000   2.13884789
  0.21540000   2.13884693
  0.21540000   2.13884602
  0.21560000   2.13989095
  0.21560000   2.13988693
  0.21560000   2.13988331
  0.21560000   2.13988004
  0.21560000   2.13987705
  0.21560000   2.13987432
  0.21560000   2.13987182
  0.21560000   2.13986951
  0.21560000   2.13986738
  0.21560000   2.13986540
  0.21560000   2.13986356
  0.21560000   2.13986184
  0.21560000   2.13986024
  0.21560000   2.13985873
  0.21560000   2.13985732
  0.21560000   2.13985599
  0.21560000   2.13985474
  0.21560000   2.13985356
  0.21560000   2.13985244
  0.21560000   2.13985138
  0.21560000   2.13985037
  0.21560000   2.13984941
  0.21560000   2.13984850
  0.21580000   2.14088690
  0.21580000   2.14088289
  0.21580000   2.14087927
  0.21580000   2.14087599
  0.21580000   2.14087301
  0.21580000   2.14087028
  0.21580000   2.14086778
  0.21580000   2.14086547
  0.21580000   2.14086333
  0.21580000   2.14086135
  0.21580000   2.14085951
  0.21580000   2.14085779
  0.21580000   2.14085619
  0.21580000   2.14085468
  0.21580000   2.14085327
  0.21580000   2.14085194
  0.21580000   2.14085068
  0.21580000   2.14084950
  0.21580000   2.14084838
  0.21580000   2.14084731
  0.21580000   2.14084631
  0.21580000   2.14084535
  0.21580000   2.14084444
  0.21600000   2.14187638
  0.21600000   2.14187236
  0.21600000   2.14186875
  0.21600000   2.14186547
  0.21600000   2.14186249
  0.21600000   2.14185976
  0.21600000   2.14185725
  0.21600000   2.14185495
  0.21600000   2.14185281
  0.21600000   2.14185083
  0.21600000   2.14184899
  0.21600000   2.14184727
  0.21600000   2.14184566
  0.21600000   2.14184415
  0.21600000   2.14184274
  0.21600000   2.14184140
  0.21600000   2.14184015
  0.21600000   2.14183896
  0.21600000   2.14183784
  0.21600000   2.14183678
  0.21600000   2.14183577
  0.21600000   2.14183481
  0.21600000   2.14183389
  0.21620000   2.14285944
  0.21620000   2.14285543
  0.21620000   2.14285182
  0.21620000   2.14284854
  0.21620000   2.14284556
  0.21620000   2.14284283
  0.21620000   2.14284033
  0.21620000   2.14283801
  0.21620000   2.14283588
  0.21620000   2.14283390
  0.21620000   2.14283205
  0.21620000   2.14283033
  0.21620000   2.14282872
  0.21620000   2.14282721
  0.21620000   2.14282580
  0.21620000   2.14282446
  0.21620000   2.14282320
  0.21620000   2.14282202
  0.21620000   2.14282089
  0.21620000   2.14281983
  0.21620000   2.14281882
  0.21620000   2.14281786
  0.21620000   2.14281694
  0.21640000   2.14383617
  0.21640000   2.14383216
  0.21640000   2.14382855
  0.21640000   2.14382527
  0.21640000   2.14382229
  0.21640000   2.14381956
  0.21640000   2.14381705
  0.21640000   2.14381474
  0.21640000   2.14381260
  0.21640000   2.14381062
  0.21640000   2.14380877
  0.21640000   2.14380705
  0.21640000   2.14380544
  0.21640000   2.14380393
  0.21640000   2.14380251
  0.21640000   2.14380118
  0.21640000   2.14379992
  0.21640000   2.14379873
  0.21640000   2.14379761
  0.21640000   2.14379654
  0.21640000   2.14379553
  0.21640000   2.14379457
  0.21640000   2.14379365
  0.21660000   2.14480662
  0.21660000   2.14480261
  0.21660000   2.14479900
  0.21660000   2.14479573
  0.21660000   2.14479274
  0.21660000   2.14479001
  0.21660000   2.14478751
  0.21660000   2.14478519
  0.21660000   2.14478305
  0.21660000   2.14478107
  0.21660000   2.14477922
  0.21660000   2.14477750
  0.21660000   2.14477589
  0.21660000   2.14477437
  0.21660000   2.14477295
  0.21660000   2.14477162
  0.21660000   2.14477036
  0.21660000   2.14476917
  0.21660000   2.14476804
  0.21660000   2.14476697
  0.21660000   2.14476596
  0.21660000   2.14476500
  0.21660000   2.14476408
  0.21680000   2.14577086
  0.21680000   2.14576685
  0.21680000   2.14576324
  0.21680000   2.14575997
  0.21680000   2.14575698
  0.21680000   2.14575425
  0.21680000   2.14575175
  0.21680000   2.14574943
  0.21680000   2.14574729
  0.21680000   2.14574530
  0.21680000   2.14574346
  0.21680000   2.14574173
  0.21680000   2.14574012
  0.21680000   2.14573860
  0.21680000   2.14573718
  0.21680000   2.14573585
  0.21680000   2.14573458
  0.21680000   2.14573339
  0.21680000   2.14573226
  0.21680000   2.14573119
  0.21680000   2.14573018
  0.21680000   2.14572922
  0.21680000   2.14572830
  0.21700000   2.14672895
  0.21700000   2.14672495
  0.21700000   2.14672133
  0.21700000   2.14671806
  0.21700000   2.14671508
  0.21700000   2.14671235
  0.21700000   2.14670984
  0.21700000   2.14670752
  0.21700000   2.14670538
  0.21700000   2.14670339
  0.21700000   2.14670154
  0.21700000   2.14669982
  0.21700000   2.14669820
  0.21700000   2.14669669
  0.21700000   2.14669526
  0.21700000   2.14669392
  0.21700000   2.14669266
  0.21700000   2.14669147
  0.21700000   2.14669034
  0.21700000   2.14668927
  0.21700000   2.14668825
  0.21700000   2.14668729
  0.21700000   2.14668637
  0.21720000   2.14768095
  0.21720000   2.14767695
  0.21720000   2.14767334
  0.21720000   2.14767007
  0.21720000   2.14766708
  0.21720000   2.14766435
  0.21720000   2.14766184
  0.21720000   2.14765953
  0.21720000   2.14765738
  0.21720000   2.14765539
  0.21720000   2.14765354
  0.21720000   2.14765181
  0.21720000   2.14765020
  0.21720000   2.14764868
  0.21720000   2.14764726
  0.21720000   2.14764592
  0.21720000   2.14764465
  0.21720000   2.14764346
  0.21720000   2.14764233
  0.21720000   2.14764125
  0.21720000   2.14764024
  0.21720000   2.14763927
  0.21720000   2.14763835
  0.21740000   2.14862693
  0.21740000   2.14862293
  0.21740000   2.14861933
  0.21740000   2.14861605
  0.21740000   2.14861307
  0.21740000   2.14861033
  0.21740000   2.14860782
  0.21740000   2.14860551
  0.21740000   2.14860336
  0.21740000   2.14860137
  0.21740000   2.14859952
  0.21740000   2.14859779
  0.21740000   2.14859617
  0.21740000   2.14859465
  0.21740000   2.14859323
  0.21740000   2.14859188
  0.21740000   2.14859062
  0.21740000   2.14858942
  0.21740000   2.14858829
  0.21740000   2.14858722
  0.21740000   2.14858620
  0.21740000   2.14858523
  0.21740000   2.14858431
  0.21760000   2.14956695
  0.21760000   2.14956295
  0.21760000   2.14955934
  0.21760000   2.14955607
  0.21760000   2.14955309
  0.21760000   2.14955035
  0.21760000   2.14954784
  0.21760000   2.14954552
  0.21760000   2.14954338
  0.21760000   2.14954138
  0.21760000   2.14953953
  0.21760000   2.14953780
  0.21760000   2.14953618
  0.21760000   2.14953466
  0.21760000   2.14953323
  0.21760000   2.14953189
  0.21760000   2.14953062
  0.21760000   2.14952942
  0.21760000   2.14952829
  0.21760000   2.14952722
  0.21760000   2.14952619
  0.21760000   2.14952522
  0.21760000   2.14952430
  0.21780000   2.15050107
  0.21780000   2.15049707
  0.21780000   2.15049346
  0.21780000   2.15049019
  0.21780000   2.15048720
  0.21780000   2.15048447
  0.21780000   2.15048195
  0.21780000   2.15047964
  0.21780000   2.15047749
  0.21780000   2.15047550
  0.21780000   2.15047364
  0.21780000   2.15047191
  0.21780000   2.15047029
  0.21780000   2.15046877
  0.21780000   2.15046734
  0.21780000   2.15046599
  0.21780000   2.15046472
  0.21780000   2.15046352
  0.21780000   2.15046239
  0.21780000   2.15046131
  0.21780000   2.15046029
  0.21780000   2.15045932
  0.21780000   2.15045839
  0.21800000   2.15142934
  0.21800000   2.15142534
  0.21800000   2.15142174
  0.21800000   2.15141846
  0.21800000   2.15141547
  0.21800000   2.15141274
  0.21800000   2.15141023
  0.21800000   2.15140790
  0.21800000   2.15140576
  0.21800000   2.15140376
  0.21800000   2.15140190
  0.21800000   2.15140017
  0.21800000   2.15139855
  0.21800000   2.15139703
  0.21800000   2.15139560
  0.21800000   2.15139425
  0.21800000   2.15139298
  0.21800000   2.15139178
  0.21800000   2.15139064
  0.21800000   2.15138956
  0.21800000   2.15138854
  0.21800000   2.15138757
  0.21800000   2.15138664
  0.21820000   2.15235182
  0.21820000   2.15234783
  0.21820000   2.15234422
  0.21820000   2.15234095
  0.21820000   2.15233796
  0.21820000   2.15233523
  0.21820000   2.15233271
  0.21820000   2.15233039
  0.21820000   2.15232824
  0.21820000   2.15232624
  0.21820000   2.15232438
  0.21820000   2.15232265
  0.21820000   2.15232102
  0.21820000   2.15231950
  0.21820000   2.15231807
  0.21820000   2.15231672
  0.21820000   2.15231545
  0.21820000   2.15231425
  0.21820000   2.15231311
  0.21820000   2.15231203
  0.21820000   2.15231100
  0.21820000   2.15231003
  0.21820000   2.15230910
  0.21840000   2.15326858
  0.21840000   2.15326459
  0.21840000   2.15326098
  0.21840000   2.15325771
  0.21840000   2.15325472
  0.21840000   2.15325198
  0.21840000   2.15324947
  0.21840000   2.15324714
  0.21840000   2.15324499
  0.21840000   2.15324300
  0.21840000   2.15324114
  0.21840000   2.15323940
  0.21840000   2.15323777
  0.21840000   2.15323625
  0.21840000   2.15323481
  0.21840000   2.15323346
  0.21840000   2.15323219
  0.21840000   2.15323099
  0.21840000   2.15322985
  0.21840000   2.15322877
  0.21840000   2.15322774
  0.21840000   2.15322676
  0.21840000   2.15322584
  0.21860000   2.15417967
  0.21860000   2.15417568
  0.21860000   2.15417207
  0.21860000   2.15416880
  0.21860000   2.15416581
  0.21860000   2.15416307
  0.21860000   2.15416055
  0.21860000   2.15415823
  0.21860000   2.15415608
  0.21860000   2.15415408
  0.21860000   2.15415222
  0.21860000   2.15415048
  0.21860000   2.15414885
  0.21860000   2.15414732
  0.21860000   2.15414589
  0.21860000   2.15414454
  0.21860000   2.15414326
  0.21860000   2.15414205
  0.21860000   2.15414091
  0.21860000   2.15413983
  0.21860000   2.15413880
  0.21860000   2.15413783
  0.21860000   2.15413690
  0.21880000   2.15508514
  0.21880000   2.15508115
  0.21880000   2.15507755
  0.21880000   2.15507427
  0.21880000   2.15507128
  0.21880000   2.15506854
  0.21880000   2.15506602
  0.21880000   2.15506370
  0.21880000   2.15506154
  0.21880000   2.15505954
  0.21880000   2.15505768
  0.21880000   2.15505594
  0.21880000   2.15505431
  0.21880000   2.15505278
  0.21880000   2.15505134
  0.21880000   2.15504999
  0.21880000   2.15504871
  0.21880000   2.15504751
  0.21880000   2.15504636
  0.21880000   2.15504528
  0.21880000   2.15504425
  0.21880000   2.15504327
  0.21880000   2.15504234
  0.21900000   2.15598506
  0.21900000   2.15598106
  0.21900000   2.15597746
  0.21900000   2.15597418
  0.21900000   2.15597119
  0.21900000   2.15596845
  0.21900000   2.15596593
  0.21900000   2.15596361
  0.21900000   2.15596145
  0.21900000   2.15595945
  0.21900000   2.15595758
  0.21900000   2.15595584
  0.21900000   2.15595421
  0.21900000   2.15595268
  0.21900000   2.15595124
  0.21900000   2.15594989
  0.21900000   2.15594861
  0.21900000   2.15594740
  0.21900000   2.15594626
  0.21900000   2.15594517
  0.21900000   2.15594414
  0.21900000   2.15594316
  0.21900000   2.15594223
  0.21920000   2.15687946
  0.21920000   2.15687547
  0.21920000   2.15687187
  0.21920000   2.15686859
  0.21920000   2.15686560
  0.21920000   2.15686286
  0.21920000   2.15686034
  0.21920000   2.15685801
  0.21920000   2.15685585
  0.21920000   2.15685385
  0.21920000   2.15685198
  0.21920000   2.15685024
  0.21920000   2.15684860
  0.21920000   2.15684707
  0.21920000   2.15684563
  0.21920000   2.15684428
  0.21920000   2.15684300
  0.21920000   2.15684179
  0.21920000   2.15684064
  0.21920000   2.15683955
  0.21920000   2.15683852
  0.21920000   2.15683754
  0.21920000   2.15683661
  0.21940000   2.15776842
  0.21940000   2.15776443
  0.21940000   2.15776082
  0.21940000   2.15775754
  0.21940000   2.15775455
  0.21940000   2.15775181
  0.21940000   2.15774929
  0.21940000   2.15774696
  0.21940000   2.15774480
  0.21940000   2.15774279
  0.21940000   2.15774093
  0.21940000   2.15773918
  0.21940000   2.15773755
  0.21940000   2.15773601
  0.21940000   2.15773457
  0.21940000   2.15773321
  0.21940000   2.15773193
  0.21940000   2.15773072
  0.21940000   2.15772957
  0.21940000   2.15772849
  0.21940000   2.15772745
  0.21940000   2.15772647
  0.21940000   2.15772553
  0.21960000   2.15865197
  0.21960000   2.15864798
  0.21960000   2.15864438
  0.21960000   2.15864110
  0.21960000   2.15863811
  0.21960000   2.15863536
  0.21960000   2.15863284
  0.21960000   2.15863051
  0.21960000   2.15862835
  0.21960000   2.15862634
  0.21960000   2.15862447
  0.21960000   2.15862273
  0.21960000   2.15862109
  0.21960000   2.15861955
  0.21960000   2.15861811
  0.21960000   2.15861675
  0.21960000   2.15861547
  0.21960000   2.15861426
  0.21960000   2.15861311
  0.21960000   2.15861202
  0.21960000   2.15861098
  0.21960000   2.15861000
  0.21960000   2.15860906
  0.21980000   2.15953018
  0.21980000   2.15952619
  0.21980000   2.15952259
  0.21980000   2.15951931
  0.21980000   2.15951632
  0.21980000   2.15951357
  0.21980000   2.15951105
  0.21980000   2.15950871
  0.21980000   2.15950655
  0.21980000   2.15950454
  0.21980000   2.15950267
  0.21980000   2.15950092
  0.21980000   2.15949928
  0.21980000   2.15949775
  0.21980000   2.15949630
  0.21980000   2.15949494
  0.21980000   2.15949366
  0.21980000   2.15949244
  0.21980000   2.15949129
  0.21980000   2.15949020
  0.21980000   2.15948916
  0.21980000   2.15948818
  0.21980000   2.15948724
  0.22000000   2.16040310
  0.22000000   2.16039911
  0.22000000   2.16039550
  0.22000000   2.16039222
  0.22000000   2.16038923
  0.22000000   2.16038648
  0.22000000   2.16038395
  0.22000000   2.16038162
  0.22000000   2.16037946
  0.22000000   2.16037745
  0.22000000   2.16037557
  0.22000000   2.16037382
  0.22000000   2.16037218
  0.22000000   2.16037065
  0.22000000   2.16036920
  0.22000000   2.16036784
  0.22000000   2.16036655
  0.22000000   2.16036533
  0.22000000   2.16036418
  0.22000000   2.16036309
  0.22000000   2.16036205
  0.22000000   2.16036106
  0.22000000   2.16036013
  0.22020000   2.16127076
  0.22020000   2.16126678
  0.22020000   2.16126317
  0.22020000   2.16125989
  0.22020000   2.16125689
  0.22020000   2.16125415
  0.22020000   2.16125162
  0.22020000   2.16124928
  0.22020000   2.16124712
  0.22020000   2.16124511
  0.22020000   2.16124323
  0.22020000   2.16124148
  0.22020000   2.16123984
  0.22020000   2.16123830
  0.22020000   2.16123685
  0.22020000   2.16123549
  0.22020000   2.16123420
  0.22020000   2.16123298
  0.22020000   2.16123183
  0.22020000   2.16123073
  0.22020000   2.16122969
  0.22020000   2.16122871
  0.22020000   2.16122776
  0.22040000   2.16213324
  0.22040000   2.16212925
  0.22040000   2.16212564
  0.22040000   2.16212236
  0.22040000   2.16211937
  0.22040000   2.16211662
  0.22040000   2.16211409
  0.22040000   2.16211175
  0.22040000   2.16210958
  0.22040000   2.16210757
  0.22040000   2.16210569
  0.22040000   2.16210394
  0.22040000   2.16210230
  0.22040000   2.16210076
  0.22040000   2.16209931
  0.22040000   2.16209794
  0.22040000   2.16209665
  0.22040000   2.16209543
  0.22040000   2.16209428
  0.22040000   2.16209318
  0.22040000   2.16209214
  0.22040000   2.16209115
  0.22040000   2.16209021
  0.22060000   2.16299057
  0.22060000   2.16298658
  0.22060000   2.16298297
  0.22060000   2.16297969
  0.22060000   2.16297669
  0.22060000   2.16297394
  0.22060000   2.16297141
  0.22060000   2.16296907
  0.22060000   2.16296691
  0.22060000   2.16296489
  0.22060000   2.16296301
  0.22060000   2.16296126
  0.22060000   2.16295961
  0.22060000   2.16295807
  0.22060000   2.16295662
  0.22060000   2.16295525
  0.22060000   2.16295396
  0.22060000   2.16295274
  0.22060000   2.16295158
  0.22060000   2.16295048
  0.22060000   2.16294944
  0.22060000   2.16294845
  0.22060000   2.16294751
  0.22080000   2.16384280
  0.22080000   2.16383881
  0.22080000   2.16383520
  0.22080000   2.16383192
  0.22080000   2.16382892
  0.22080000   2.16382617
  0.22080000   2.16382364
  0.22080000   2.16382130
  0.22080000   2.16381913
  0.22080000   2.16381711
  0.22080000   2.16381523
  0.22080000   2.16381348
  0.22080000   2.16381183
  0.22080000   2.16381028
  0.22080000   2.16380883
  0.22080000   2.16380746
  0.22080000   2.16380617
  0.22080000   2.16380495
  0.22080000   2.16380379
  0.22080000   2.16380269
  0.22080000   2.16380165
  0.22080000   2.16380065
  0.22080000   2.16379971
  0.22100000   2.16468998
  0.22100000   2.16468600
  0.22100000   2.16468239
  0.22100000   2.16467911
  0.22100000   2.16467611
  0.22100000   2.16467335
  0.22100000   2.16467082
  0.22100000   2.16466848
  0.22100000   2.16466631
  0.22100000   2.16466429
  0.22100000   2.16466240
  0.22100000   2.16466065
  0.22100000   2.16465900
  0.22100000   2.16465745
  0.22100000   2.16465600
  0.22100000   2.16465463
  0.22100000   2.16465333
  0.22100000   2.16465211
  0.22100000   2.16465095
  0.22100000   2.16464985
  0.22100000   2.16464880
  0.22100000   2.16464781
  0.22100000   2.16464686
  0.22120000   2.16553217
  0.22120000   2.16552818
  0.22120000   2.16552457
  0.22120000   2.16552129
  0.22120000   2.16551829
  0.22120000   2.16551553
  0.22120000   2.16551300
  0.22120000   2.16551065
  0.22120000   2.16550848
  0.22120000   2.16550646
  0.22120000   2.16550458
  0.22120000   2.16550282
  0.22120000   2.16550117
  0.22120000   2.16549962
  0.22120000   2.16549816
  0.22120000   2.16549679
  0.22120000   2.16549549
  0.22120000   2.16549427
  0.22120000   2.16549311
  0.22120000   2.16549200
  0.22120000   2.16549096
  0.22120000   2.16548996
  0.22120000   2.16548901
  0.22140000   2.16636940
  0.22140000   2.16636541
  0.22140000   2.16636180
  0.22140000   2.16635852
  0.22140000   2.16635551
  0.22140000   2.16635276
  0.22140000   2.16635022
  0.22140000   2.16634788
  0.22140000   2.16634570
  0.22140000   2.16634368
  0.22140000   2.16634179
  0.22140000   2.16634003
  0.22140000   2.16633838
  0.22140000   2.16633683
  0.22140000   2.16633537
  0.22140000   2.16633400
  0.22140000   2.16633270
  0.22140000   2.16633147
  0.22140000   2.16633031
  0.22140000   2.16632921
  0.22140000   2.16632816
  0.22140000   2.16632716
  0.22140000   2.16632621
  0.22160000   2.16720172
  0.22160000   2.16719773
  0.22160000   2.16719412
  0.22160000   2.16719084
  0.22160000   2.16718783
  0.22160000   2.16718508
  0.22160000   2.16718254
  0.22160000   2.16718019
  0.22160000   2.16717801
  0.22160000   2.16717599
  0.22160000   2.16717410
  0.22160000   2.16717234
  0.22160000   2.16717068
  0.22160000   2.16716913
  0.22160000   2.16716767
  0.22160000   2.16716630
  0.22160000   2.16716500
  0.22160000   2.16716377
  0.22160000   2.16716260
  0.22160000   2.16716150
  0.22160000   2.16716045
  0.22160000   2.16715945
  0.22160000   2.16715850
  0.22180000   2.16802918
  0.22180000   2.16802519
  0.22180000   2.16802158
  0.22180000   2.16801830
  0.22180000   2.16801529
  0.22180000   2.16801253
  0.22180000   2.16800999
  0.22180000   2.16800764
  0.22180000   2.16800546
  0.22180000   2.16800344
  0.22180000   2.16800155
  0.22180000   2.16799978
  0.22180000   2.16799813
  0.22180000   2.16799657
  0.22180000   2.16799511
  0.22180000   2.16799373
  0.22180000   2.16799243
  0.22180000   2.16799120
  0.22180000   2.16799004
  0.22180000   2.16798893
  0.22180000   2.16798788
  0.22180000   2.16798688
  0.22180000   2.16798593
  0.22200000   2.16885182
  0.22200000   2.16884784
  0.22200000   2.16884422
  0.22200000   2.16884094
  0.22200000   2.16883793
  0.22200000   2.16883517
  0.22200000   2.16883263
  0.22200000   2.16883028
  0.22200000   2.16882810
  0.22200000   2.16882607
  0.22200000   2.16882418
  0.22200000   2.16882241
  0.22200000   2.16882075
  0.22200000   2.16881920
  0.22200000   2.16881773
  0.22200000   2.16881635
  0.22200000   2.16881505
  0.22200000   2.16881382
  0.22200000   2.16881265
  0.22200000   2.16881155
  0.22200000   2.16881049
  0.22200000   2.16880949
  0.22200000   2.16880854
  0.22220000   2.16966970
  0.22220000   2.16966571
  0.22220000   2.16966209
  0.22220000   2.16965880
  0.22220000   2.16965580
  0.22220000   2.16965304
  0.22220000   2.16965049
  0.22220000   2.16964814
  0.22220000   2.16964596
  0.22220000   2.16964393
  0.22220000   2.16964203
  0.22220000   2.16964026
  0.22220000   2.16963861
  0.22220000   2.16963705
  0.22220000   2.16963558
  0.22220000   2.16963420
  0.22220000   2.16963290
  0.22220000   2.16963166
  0.22220000   2.16963050
  0.22220000   2.16962939
  0.22220000   2.16962833
  0.22220000   2.16962733
  0.22220000   2.16962638
  0.22240000   2.17048284
  0.22240000   2.17047885
  0.22240000   2.17047523
  0.22240000   2.17047194
  0.22240000   2.17046894
  0.22240000   2.17046617
  0.22240000   2.17046363
  0.22240000   2.17046127
  0.22240000   2.17045909
  0.22240000   2.17045706
  0.22240000   2.17045516
  0.22240000   2.17045339
  0.22240000   2.17045173
  0.22240000   2.17045017
  0.22240000   2.17044870
  0.22240000   2.17044732
  0.22240000   2.17044602
  0.22240000   2.17044478
  0.22240000   2.17044361
  0.22240000   2.17044250
  0.22240000   2.17044144
  0.22240000   2.17044044
  0.22240000   2.17043948
  0.22260000   2.17129129
  0.22260000   2.17128730
  0.22260000   2.17128369
  0.22260000   2.17128040
  0.22260000   2.17127739
  0.22260000   2.17127462
  0.22260000   2.17127208
  0.22260000   2.17126972
  0.22260000   2.17126753
  0.22260000   2.17126550
  0.22260000   2.17126360
  0.22260000   2.17126183
  0.22260000   2.17126017
  0.22260000   2.17125861
  0.22260000   2.17125714
  0.22260000   2.17125575
  0.22260000   2.17125445
  0.22260000   2.17125321
  0.22260000   2.17125204
  0.22260000   2.17125093
  0.22260000   2.17124987
  0.22260000   2.17124886
  0.22260000   2.17124791
  0.22280000   2.17209511
  0.22280000   2.17209112
  0.22280000   2.17208750
  0.22280000   2.17208421
  0.22280000   2.17208120
  0.22280000   2.17207843
  0.22280000   2.17207588
  0.22280000   2.17207352
  0.22280000   2.17207134
  0.22280000   2.17206930
  0.22280000   2.17206740
  0.22280000   2.17206563
  0.22280000   2.17206396
  0.22280000   2.17206240
  0.22280000   2.17206093
  0.22280000   2.17205954
  0.22280000   2.17205823
  0.22280000   2.17205700
  0.22280000   2.17205582
  0.22280000   2.17205471
  0.22280000   2.17205365
  0.22280000   2.17205264
  0.22280000   2.17205168
  0.22300000   2.17289432
  0.22300000   2.17289033
  0.22300000   2.17288671
  0.22300000   2.17288342
  0.22300000   2.17288041
  0.22300000   2.17287764
  0.22300000   2.17287509
  0.22300000   2.17287273
  0.22300000   2.17287054
  0.22300000   2.17286850
  0.22300000   2.17286660
  0.22300000   2.17286482
  0.22300000   2.17286316
  0.22300000   2.17286159
  0.22300000   2.17286012
  0.22300000   2.17285873
  0.22300000   2.17285742
  0.22300000   2.17285618
  0.22300000   2.17285501
  0.22300000   2.17285389
  0.22300000   2.17285283
  0.22300000   2.17285182
  0.22300000   2.17285086
  0.22320000   2.17368898
  0.22320000   2.17368499
  0.22320000   2.17368137
  0.22320000   2.17367807
  0.22320000   2.17367506
  0.22320000   2.17367229
  0.22320000   2.17366973
  0.22320000   2.17366737
  0.22320000   2.17366518
  0.22320000   2.17366314
  0.22320000   2.17366124
  0.22320000   2.17365946
  0.22320000   2.17365779
  0.22320000   2.17365623
  0.22320000   2.17365475
  0.22320000   2.17365336
  0.22320000   2.17365205
  0.22320000   2.17365081
  0.22320000   2.17364963
  0.22320000   2.17364852
  0.22320000   2.17364745
  0.22320000   2.17364644
  0.22320000   2.17364548
  0.22340000   2.17447911
  0.22340000   2.17447512
  0.22340000   2.17447150
  0.22340000   2.17446821
  0.22340000   2.17446519
  0.22340000   2.17446242
  0.22340000   2.17445986
  0.22340000   2.17445750
  0.22340000   2.17445531
  0.22340000   2.17445327
  0.22340000   2.17445136
  0.22340000   2.17444958
  0.22340000   2.17444791
  0.22340000   2.17444634
  0.22340000   2.17444487
  0.22340000   2.17444348
  0.22340000   2.17444216
  0.22340000   2.17444092
  0.22340000   2.17443974
  0.22340000   2.17443862
  0.22340000   2.17443756
  0.22340000   2.17443655
  0.22340000   2.17443558
  0.22360000   2.17526477
  0.22360000   2.17526078
  0.22360000   2.17525716
  0.22360000   2.17525386
  0.22360000   2.17525085
  0.22360000   2.17524807
  0.22360000   2.17524551
  0.22360000   2.17524315
  0.22360000   2.17524095
  0.22360000   2.17523891
  0.22360000   2.17523701
  0.22360000   2.17523522
  0.22360000   2.17523355
  0.22360000   2.17523198
  0.22360000   2.17523050
  0.22360000   2.17522911
  0.22360000   2.17522780
  0.22360000   2.17522655
  0.22360000   2.17522537
  0.22360000   2.17522425
  0.22360000   2.17522319
  0.22360000   2.17522217
  0.22360000   2.17522121
  0.22380000   2.17604600
  0.22380000   2.17604201
  0.22380000   2.17603838
  0.22380000   2.17603508
  0.22380000   2.17603206
  0.22380000   2.17602929
  0.22380000   2.17602673
  0.22380000   2.17602436
  0.22380000   2.17602217
  0.22380000   2.17602012
  0.22380000   2.17601821
  0.22380000   2.17601643
  0.22380000   2.17601476
  0.22380000   2.17601318
  0.22380000   2.17601170
  0.22380000   2.17601031
  0.22380000   2.17600899
  0.22380000   2.17600775
  0.22380000   2.17600656
  0.22380000   2.17600544
  0.22380000   2.17600438
  0.22380000   2.17600336
  0.22380000   2.17600240
  0.22400000   2.17682283
  0.22400000   2.17681883
  0.22400000   2.17681521
  0.22400000   2.17681191
  0.22400000   2.17680888
  0.22400000   2.17680611
  0.22400000   2.17680355
  0.22400000   2.17680118
  0.22400000   2.17679898
  0.22400000   2.17679693
  0.22400000   2.17679502
  0.22400000   2.17679324
  0.22400000   2.17679156
  0.22400000   2.17678999
  0.22400000   2.17678851
  0.22400000   2.17678711
  0.22400000   2.17678579
  0.22400000   2.17678454
  0.22400000   2.17678336
  0.22400000   2.17678224
  0.22400000   2.17678117
  0.22400000   2.17678015
  0.22400000   2.17677919
  0.22420000   2.17759529
  0.22420000   2.17759130
  0.22420000   2.17758767
  0.22420000   2.17758437
  0.22420000   2.17758135
  0.22420000   2.17757857
  0.22420000   2.17757601
  0.22420000   2.17757363
  0.22420000   2.17757143
  0.22420000   2.17756939
  0.22420000   2.17756747
  0.22420000   2.17756569
  0.22420000   2.17756401
  0.22420000   2.17756243
  0.22420000   2.17756095
  0.22420000   2.17755955
  0.22420000   2.17755823
  0.22420000   2.17755698
  0.22420000   2.17755580
  0.22420000   2.17755467
  0.22420000   2.17755360
  0.22420000   2.17755259
  0.22420000   2.17755162
  0.22440000   2.17836344
  0.22440000   2.17835945
  0.22440000   2.17835582
  0.22440000   2.17835252
  0.22440000   2.17834949
  0.22440000   2.17834671
  0.22440000   2.17834415
  0.22440000   2.17834177
  0.22440000   2.17833957
  0.22440000   2.17833752
  0.22440000   2.17833561
  0.22440000   2.17833382
  0.22440000   2.17833214
  0.22440000   2.17833056
  0.22440000   2.17832908
  0.22440000   2.17832767
  0.22440000   2.17832635
  0.22440000   2.17832510
  0.22440000   2.17832391
  0.22440000   2.17832279
  0.22440000   2.17832172
  0.22440000   2.17832070
  0.22440000   2.17831973
  0.22460000   2.17912731
  0.22460000   2.17912331
  0.22460000   2.17911969
  0.22460000   2.17911638
  0.22460000   2.17911335
  0.22460000   2.17911057
  0.22460000   2.17910800
  0.22460000   2.17910563
  0.22460000   2.17910342
  0.22460000   2.17910137
  0.22460000   2.17909946
  0.22460000   2.17909766
  0.22460000   2.17909598
  0.22460000   2.17909440
  0.22460000   2.17909292
  0.22460000   2.17909152
  0.22460000   2.17909019
  0.22460000   2.17908894
  0.22460000   2.17908775
  0.22460000   2.17908662
  0.22460000   2.17908555
  0.22460000   2.17908453
  0.22460000   2.17908356
  0.22480000   2.17988693
  0.22480000   2.17988294
  0.22480000   2.17987931
  0.22480000   2.17987600
  0.22480000   2.17987297
  0.22480000   2.17987019
  0.22480000   2.17986762
  0.22480000   2.17986524
  0.22480000   2.17986303
  0.22480000   2.17986098
  0.22480000   2.17985906
  0.22480000   2.17985727
  0.22480000   2.17985559
  0.22480000   2.17985401
  0.22480000   2.17985252
  0.22480000   2.17985111
  0.22480000   2.17984979
  0.22480000   2.17984853
  0.22480000   2.17984734
  0.22480000   2.17984621
  0.22480000   2.17984514
  0.22480000   2.17984412
  0.22480000   2.17984314
  0.22500000   2.18064235
  0.22500000   2.18063835
  0.22500000   2.18063472
  0.22500000   2.18063141
  0.22500000   2.18062838
  0.22500000   2.18062560
  0.22500000   2.18062303
  0.22500000   2.18062065
  0.22500000   2.18061844
  0.22500000   2.18061638
  0.22500000   2.18061446
  0.22500000   2.18061267
  0.22500000   2.18061098
  0.22500000   2.18060940
  0.22500000   2.18060791
  0.22500000   2.18060650
  0.22500000   2.18060518
  0.22500000   2.18060392
  0.22500000   2.18060273
  0.22500000   2.18060160
  0.22500000   2.18060052
  0.22500000   2.18059950
  0.22500000   2.18059852
  0.22520000   2.18139360
  0.22520000   2.18138960
  0.22520000   2.18138597
  0.22520000   2.18138266
  0.22520000   2.18137962
  0.22520000   2.18137684
  0.22520000   2.18137426
  0.22520000   2.18137188
  0.22520000   2.18136967
  0.22520000   2.18136761
  0.22520000   2.18136569
  0.22520000   2.18136389
  0.22520000   2.18136221
  0.22520000   2.18136062
  0.22520000   2.18135913
  0.22520000   2.18135772
  0.22520000   2.18135639
  0.22520000   2.18135514
  0.22520000   2.18135394
  0.22520000   2.18135281
  0.22520000   2.18135173
  0.22520000   2.18135071
  0.22520000   2.18134973
  0.22540000   2.18214071
  0.22540000   2.18213671
  0.22540000   2.18213308
  0.22540000   2.18212977
  0.22540000   2.18212673
  0.22540000   2.18212394
  0.22540000   2.18212137
  0.22540000   2.18211898
  0.22540000   2.18211677
  0.22540000   2.18211471
  0.22540000   2.18211279
  0.22540000   2.18211099
  0.22540000   2.18210930
  0.22540000   2.18210771
  0.22540000   2.18210622
  0.22540000   2.18210481
  0.22540000   2.18210348
  0.22540000   2.18210222
  0.22540000   2.18210103
  0.22540000   2.18209989
  0.22540000   2.18209881
  0.22540000   2.18209779
  0.22540000   2.18209681
  0.22560000   2.18288373
  0.22560000   2.18287973
  0.22560000   2.18287609
  0.22560000   2.18287278
  0.22560000   2.18286974
  0.22560000   2.18286695
  0.22560000   2.18286437
  0.22560000   2.18286199
  0.22560000   2.18285977
  0.22560000   2.18285771
  0.22560000   2.18285579
  0.22560000   2.18285398
  0.22560000   2.18285229
  0.22560000   2.18285071
  0.22560000   2.18284921
  0.22560000   2.18284780
  0.22560000   2.18284647
  0.22560000   2.18284521
  0.22560000   2.18284401
  0.22560000   2.18284287
  0.22560000   2.18284179
  0.22560000   2.18284077
  0.22560000   2.18283979
  0.22580000   2.18362269
  0.22580000   2.18361868
  0.22580000   2.18361505
  0.22580000   2.18361173
  0.22580000   2.18360869
  0.22580000   2.18360590
  0.22580000   2.18360332
  0.22580000   2.18360093
  0.22580000   2.18359871
  0.22580000   2.18359665
  0.22580000   2.18359472
  0.22580000   2.18359292
  0.22580000   2.18359123
  0.22580000   2.18358964
  0.22580000   2.18358814
  0.22580000   2.18358673
  0.22580000   2.18358539
  0.22580000   2.18358413
  0.22580000   2.18358293
  0.22580000   2.18358179
  0.22580000   2.18358071
  0.22580000   2.18357968
  0.22580000   2.18357870
  0.22600000   2.18435761
  0.22600000   2.18435361
  0.22600000   2.18434997
  0.22600000   2.18434665
  0.22600000   2.18434361
  0.22600000   2.18434082
  0.22600000   2.18433824
  0.22600000   2.18433585
  0.22600000   2.18433363
  0.22600000   2.18433156
  0.22600000   2.18432963
  0.22600000   2.18432783
  0.22600000   2.18432613
  0.22600000   2.18432454
  0.22600000   2.18432304
  0.22600000   2.18432163
  0.22600000   2.18432029
  0.22600000   2.18431903
  0.22600000   2.18431783
  0.22600000   2.18431669
  0.22600000   2.18431560
  0.22600000   2.18431457
  0.22600000   2.18431359
  0.22620000   2.18508855
  0.22620000   2.18508454
  0.22620000   2.18508090
  0.22620000   2.18507758
  0.22620000   2.18507454
  0.22620000   2.18507174
  0.22620000   2.18506916
  0.22620000   2.18506677
  0.22620000   2.18506455
  0.22620000   2.18506248
  0.22620000   2.18506055
  0.22620000   2.18505874
  0.22620000   2.18505704
  0.22620000   2.18505545
  0.22620000   2.18505395
  0.22620000   2.18505253
  0.22620000   2.18505120
  0.22620000   2.18504993
  0.22620000   2.18504873
  0.22620000   2.18504759
  0.22620000   2.18504650
  0.22620000   2.18504547
  0.22620000   2.18504449
  0.22640000   2.18581553
  0.22640000   2.18581152
  0.22640000   2.18580788
  0.22640000   2.18580456
  0.22640000   2.18580151
  0.22640000   2.18579871
  0.22640000   2.18579613
  0.22640000   2.18579373
  0.22640000   2.18579151
  0.22640000   2.18578944
  0.22640000   2.18578751
  0.22640000   2.18578570
  0.22640000   2.18578400
  0.22640000   2.18578240
  0.22640000   2.18578090
  0.22640000   2.18577948
  0.22640000   2.18577814
  0.22640000   2.18577687
  0.22640000   2.18577567
  0.22640000   2.18577453
  0.22640000   2.18577344
  0.22640000   2.18577241
  0.22640000   2.18577143
  0.22660000   2.18653858
  0.22660000   2.18653457
  0.22660000   2.18653093
  0.22660000   2.18652760
  0.22660000   2.18652456
  0.22660000   2.18652176
  0.22660000   2.18651917
  0.22660000   2.18651677
  0.22660000   2.18651455
  0.22660000   2.18651248
  0.22660000   2.18651054
  0.22660000   2.18650873
  0.22660000   2.18650703
  0.22660000   2.18650543
  0.22660000   2.18650393
  0.22660000   2.18650251
  0.22660000   2.18650117
  0.22660000   2.18649990
  0.22660000   2.18649869
  0.22660000   2.18649755
  0.22660000   2.18649646
  0.22660000   2.18649543
  0.22660000   2.18649444
  0.22680000   2.18725774
  0.22680000   2.18725373
  0.22680000   2.18725009
  0.22680000   2.18724676
  0.22680000   2.18724371
  0.22680000   2.18724091
  0.22680000   2.18723832
  0.22680000   2.18723592
  0.22680000   2.18723369
  0.22680000   2.18723162
  0.22680000   2.18722968
  0.22680000   2.18722787
  0.22680000   2.18722617
  0.22680000   2.18722457
  0.22680000   2.18722306
  0.22680000   2.18722164
  0.22680000   2.18722030
  0.22680000   2.18721902
  0.22680000   2.18721782
  0.22680000   2.18721667
  0.22680000   2.18721558
  0.22680000   2.18721455
  0.22680000   2.18721356
  0.22700000   2.18797305
  0.22700000   2.18796903
  0.22700000   2.18796539
  0.22700000   2.18796206
  0.22700000   2.18795901
  0.22700000   2.18795620
  0.22700000   2.18795361
  0.22700000   2.18795121
  0.22700000   2.18794898
  0.22700000   2.18794690
  0.22700000   2.18794497
  0.22700000   2.18794315
  0.22700000   2.18794145
  0.22700000   2.18793985
  0.22700000   2.18793834
  0.22700000   2.18793691
  0.22700000   2.18793557
  0.22700000   2.18793430
  0.22700000   2.18793309
  0.22700000   2.18793194
  0.22700000   2.18793085
  0.22700000   2.18792981
  0.22700000   2.18792882
  0.22720000   2.18868452
  0.22720000   2.18868051
  0.22720000   2.18867686
  0.22720000   2.18867353
  0.22720000   2.18867048
  0.22720000   2.18866767
  0.22720000   2.18866508
  0.22720000   2.18866268
  0.22720000   2.18866044
  0.22720000   2.18865837
  0.22720000   2.18865642
  0.22720000   2.18865461
  0.22720000   2.18865290
  0.22720000   2.18865130
  0.22720000   2.18864979
  0.22720000   2.18864836
  0.22720000   2.18864702
  0.22720000   2.18864574
  0.22720000   2.18864453
  0.22720000   2.18864338
  0.22720000   2.18864229
  0.22720000   2.18864125
  0.22720000   2.18864026
  0.22740000   2.18939221
  0.22740000   2.18938819
  0.22740000   2.18938454
  0.22740000   2.18938121
  0.22740000   2.18937816
  0.22740000   2.18937535
  0.22740000   2.18937275
  0.22740000   2.18937035
  0.22740000   2.18936811
  0.22740000   2.18936603
  0.22740000   2.18936409
  0.22740000   2.18936227
  0.22740000   2.18936056
  0.22740000   2.18935896
  0.22740000   2.18935744
  0.22740000   2.18935602
  0.22740000   2.18935467
  0.22740000   2.18935339
  0.22740000   2.18935218
  0.22740000   2.18935103
  0.22740000   2.18934994
  0.22740000   2.18934890
  0.22740000   2.18934791
  0.22760000   2.19009613
  0.22760000   2.19009211
  0.22760000   2.19008846
  0.22760000   2.19008513
  0.22760000   2.19008207
  0.22760000   2.19007926
  0.22760000   2.19007666
  0.22760000   2.19007426
  0.22760000   2.19007202
  0.22760000   2.19006994
  0.22760000   2.19006799
  0.22760000   2.19006617
  0.22760000   2.19006446
  0.22760000   2.19006285
  0.22760000   2.19006134
  0.22760000   2.19005991
  0.22760000   2.19005856
  0.22760000   2.19005728
  0.22760000   2.19005607
  0.22760000   2.19005492
  0.22760000   2.19005382
  0.22760000   2.19005278
  0.22760000   2.19005179
  0.22780000   2.19079633
  0.22780000   2.19079231
  0.22780000   2.19078865
  0.22780000   2.19078532
  0.22780000   2.19078226
  0.22780000   2.19077944
  0.22780000   2.19077684
  0.22780000   2.19077443
  0.22780000   2.19077220
  0.22780000   2.19077011
  0.22780000   2.19076816
  0.22780000   2.19076634
  0.22780000   2.19076463
  0.22780000   2.19076302
  0.22780000   2.19076150
  0.22780000   2.19076007
  0.22780000   2.19075872
  0.22780000   2.19075744
  0.22780000   2.19075623
  0.22780000   2.19075507
  0.22780000   2.19075398
  0.22780000   2.19075293
  0.22780000   2.19075194
  0.22800000   2.19149282
  0.22800000   2.19148880
  0.22800000   2.19148514
  0.22800000   2.19148181
  0.22800000   2.19147874
  0.22800000   2.19147593
  0.22800000   2.19147333
  0.22800000   2.19147091
  0.22800000   2.19146867
  0.22800000   2.19146659
  0.22800000   2.19146464
  0.22800000   2.19146281
  0.22800000   2.19146110
  0.22800000   2.19145949
  0.22800000   2.19145797
  0.22800000   2.19145654
  0.22800000   2.19145518
  0.22800000   2.19145390
  0.22800000   2.19145269
  0.22800000   2.19145153
  0.22800000   2.19145043
  0.22800000   2.19144939
  0.22800000   2.19144839
  0.22820000   2.19218565
  0.22820000   2.19218162
  0.22820000   2.19217797
  0.22820000   2.19217463
  0.22820000   2.19217156
  0.22820000   2.19216874
  0.22820000   2.19216614
  0.22820000   2.19216373
  0.22820000   2.19216148
  0.22820000   2.19215939
  0.22820000   2.19215744
  0.22820000   2.19215561
  0.22820000   2.19215390
  0.22820000   2.19215229
  0.22820000   2.19215077
  0.22820000   2.19214933
  0.22820000   2.19214798
  0.22820000   2.19214669
  0.22820000   2.19214548
  0.22820000   2.19214432
  0.22820000   2.19214322
  0.22820000   2.19214217
  0.22820000   2.19214118
  0.22840000   2.19287483
  0.22840000   2.19287081
  0.22840000   2.19286715
  0.22840000   2.19286381
  0.22840000   2.19286074
  0.22840000   2.19285792
  0.22840000   2.19285531
  0.22840000   2.19285290
  0.22840000   2.19285065
  0.22840000   2.19284856
  0.22840000   2.19284661
  0.22840000   2.19284478
  0.22840000   2.19284306
  0.22840000   2.19284145
  0.22840000   2.19283993
  0.22840000   2.19283849
  0.22840000   2.19283713
  0.22840000   2.19283585
  0.22840000   2.19283463
  0.22840000   2.19283347
  0.22840000   2.19283237
  0.22840000   2.19283132
  0.22840000   2.19283032
  0.22860000   2.19356041
  0.22860000   2.19355639
  0.22860000   2.19355273
  0.22860000   2.19354938
  0.22860000   2.19354632
  0.22860000   2.19354349
  0.22860000   2.19354088
  0.22860000   2.19353847
  0.22860000   2.19353622
  0.22860000   2.19353412
  0.22860000   2.19353217
  0.22860000   2.19353034
  0.22860000   2.19352862
  0.22860000   2.19352700
  0.22860000   2.19352548
  0.22860000   2.19352404
  0.22860000   2.19352268
  0.22860000   2.19352139
  0.22860000   2.19352017
  0.22860000   2.19351901
  0.22860000   2.19351791
  0.22860000   2.19351686
  0.22860000   2.19351586
  0.22880000   2.19424242
  0.22880000   2.19423839
  0.22880000   2.19423473
  0.22880000   2.19423138
  0.22880000   2.19422831
  0.22880000   2.19422548
  0.22880000   2.19422287
  0.22880000   2.19422045
  0.22880000   2.19421820
  0.22880000   2.19421611
  0.22880000   2.19421415
  0.22880000   2.19421232
  0.22880000   2.19421059
  0.22880000   2.19420898
  0.22880000   2.19420745
  0.22880000   2.19420601
  0.22880000   2.19420465
  0.22880000   2.19420336
  0.22880000   2.19420214
  0.22880000   2.19420098
  0.22880000   2.19419987
  0.22880000   2.19419882
  0.22880000   2.19419782
  0.22900000   2.19492087
  0.22900000   2.19491684
  0.22900000   2.19491317
  0.22900000   2.19490983
  0.22900000   2.19490675
  0.22900000   2.19490393
  0.22900000   2.19490131
  0.22900000   2.19489889
  0.22900000   2.19489664
  0.22900000   2.19489454
  0.22900000   2.19489258
  0.22900000   2.19489075
  0.22900000   2.19488902
  0.22900000   2.19488740
  0.22900000   2.19488587
  0.22900000   2.19488443
  0.22900000   2.19488307
  0.22900000   2.19488178
  0.22900000   2.19488056
  0.22900000   2.19487939
  0.22900000   2.19487829
  0.22900000   2.19487723
  0.22900000   2.19487623
  0.22920000   2.19559580
  0.22920000   2.19559177
  0.22920000   2.19558810
  0.22920000   2.19558475
  0.22920000   2.19558168
  0.22920000   2.19557885
  0.22920000   2.19557623
  0.22920000   2.19557381
  0.22920000   2.19557156
  0.22920000   2.19556946
  0.22920000   2.19556749
  0.22920000   2.19556565
  0.22920000   2.19556393
  0.22920000   2.19556231
  0.22920000   2.19556078
  0.22920000   2.19555933
  0.22920000   2.19555797
  0.22920000   2.19555668
  0.22920000   2.19555545
  0.22920000   2.19555429
  0.22920000   2.19555318
  0.22920000   2.19555213
  0.22920000   2.19555112
  0.22940000   2.19626725
  0.22940000   2.19626321
  0.22940000   2.19625954
  0.22940000   2.19625619
  0.22940000   2.19625311
  0.22940000   2.19625028
  0.22940000   2.19624766
  0.22940000   2.19624524
  0.22940000   2.19624298
  0.22940000   2.19624088
  0.22940000   2.19623891
  0.22940000   2.19623707
  0.22940000   2.19623535
  0.22940000   2.19623372
  0.22940000   2.19623219
  0.22940000   2.19623075
  0.22940000   2.19622938
  0.22940000   2.19622809
  0.22940000   2.19622686
  0.22940000   2.19622569
  0.22940000   2.19622458
  0.22940000   2.19622353
  0.22940000   2.19622252
  0.22960000   2.19693523
  0.22960000   2.19693119
  0.22960000   2.19692752
  0.22960000   2.19692416
  0.22960000   2.19692108
  0.22960000   2.19691825
  0.22960000   2.19691563
  0.22960000   2.19691320
  0.22960000   2.19691094
  0.22960000   2.19690884
  0.22960000   2.19690687
  0.22960000   2.19690503
  0.22960000   2.19690330
  0.22960000   2.19690167
  0.22960000   2.19690014
  0.22960000   2.19689869
  0.22960000   2.19689733
  0.22960000   2.19689603
  0.22960000   2.19689480
  0.22960000   2.19689363
  0.22960000   2.19689252
  0.22960000   2.19689147
  0.22960000   2.19689046
  0.22980000   2.19759977
  0.22980000   2.19759573
  0.22980000   2.19759206
  0.22980000   2.19758870
  0.22980000   2.19758562
  0.22980000   2.19758278
  0.22980000   2.19758016
  0.22980000   2.19757773
  0.22980000   2.19757547
  0.22980000   2.19757336
  0.22980000   2.19757139
  0.22980000   2.19756955
  0.22980000   2.19756782
  0.22980000   2.19756619
  0.22980000   2.19756466
  0.22980000   2.19756321
  0.22980000   2.19756184
  0.22980000   2.19756054
  0.22980000   2.19755931
  0.22980000   2.19755814
  0.22980000   2.19755703
  0.22980000   2.19755597
  0.22980000   2.19755496
  0.23000000   2.19826091
  0.23000000   2.19825687
  0.23000000   2.19825319
  0.23000000   2.19824983
  0.23000000   2.19824675
  0.23000000   2.19824391
  0.23000000   2.19824128
  0.23000000   2.19823885
  0.23000000   2.19823659
  0.23000000   2.19823448
  0.23000000   2.19823251
  0.23000000   2.19823066
  0.23000000   2.19822893
  0.23000000   2.19822730
  0.23000000   2.19822576
  0.23000000   2.19822431
  0.23000000   2.19822294
  0.23000000   2.19822164
  0.23000000   2.19822041
  0.23000000   2.19821924
  0.23000000   2.19821813
  0.23000000   2.19821707
  0.23000000   2.19821605
  0.23020000   2.19891867
  0.23020000   2.19891462
  0.23020000   2.19891095
  0.23020000   2.19890758
  0.23020000   2.19890450
  0.23020000   2.19890166
  0.23020000   2.19889903
  0.23020000   2.19889659
  0.23020000   2.19889433
  0.23020000   2.19889222
  0.23020000   2.19889025
  0.23020000   2.19888840
  0.23020000   2.19888666
  0.23020000   2.19888503
  0.23020000   2.19888349
  0.23020000   2.19888204
  0.23020000   2.19888066
  0.23020000   2.19887936
  0.23020000   2.19887813
  0.23020000   2.19887696
  0.23020000   2.19887584
  0.23020000   2.19887478
  0.23020000   2.19887377
  0.23040000   2.19957307
  0.23040000   2.19956903
  0.23040000   2.19956535
  0.23040000   2.19956198
  0.23040000   2.19955890
  0.23040000   2.19955605
  0.23040000   2.19955342
  0.23040000   2.19955098
  0.23040000   2.19954872
  0.23040000   2.19954660
  0.23040000   2.19954463
  0.23040000   2.19954278
  0.23040000   2.19954104
  0.23040000   2.19953941
  0.23040000   2.19953787
  0.23040000   2.19953641
  0.23040000   2.19953504
  0.23040000   2.19953373
  0.23040000   2.19953250
  0.23040000   2.19953132
  0.23040000   2.19953021
  0.23040000   2.19952915
  0.23040000   2.19952813
  0.23060000   2.20022415
  0.23060000   2.20022011
  0.23060000   2.20021642
  0.23060000   2.20021306
  0.23060000   2.20020997
  0.23060000   2.20020712
  0.23060000   2.20020449
  0.23060000   2.20020205
  0.23060000   2.20019978
  0.23060000   2.20019766
  0.23060000   2.20019568
  0.23060000   2.20019383
  0.23060000   2.20019209
  0.23060000   2.20019046
  0.23060000   2.20018892
  0.23060000   2.20018746
  0.23060000   2.20018608
  0.23060000   2.20018478
  0.23060000   2.20018354
  0.23060000   2.20018237
  0.23060000   2.20018125
  0.23060000   2.20018018
  0.23060000   2.20017917
  0.23080000   2.20087193
  0.23080000   2.20086789
  0.23080000   2.20086420
  0.23080000   2.20086083
  0.23080000   2.20085774
  0.23080000   2.20085489
  0.23080000   2.20085225
  0.23080000   2.20084981
  0.23080000   2.20084754
  0.23080000   2.20084542
  0.23080000   2.20084344
  0.23080000   2.20084159
  0.23080000   2.20083985
  0.23080000   2.20083821
  0.23080000   2.20083666
  0.23080000   2.20083521
  0.23080000   2.20083383
  0.23080000   2.20083252
  0.23080000   2.20083128
  0.23080000   2.20083011
  0.23080000   2.20082899
  0.23080000   2.20082792
  0.23080000   2.20082690
  0.23100000   2.20151644
  0.23100000   2.20151239
  0.23100000   2.20150870
  0.23100000   2.20150533
  0.23100000   2.20150224
  0.23100000   2.20149938
  0.23100000   2.20149675
  0.23100000   2.20149430
  0.23100000   2.20149203
  0.23100000   2.20148991
  0.23100000   2.20148793
  0.23100000   2.20148607
  0.23100000   2.20148433
  0.23100000   2.20148269
  0.23100000   2.20148114
  0.23100000   2.20147968
  0.23100000   2.20147830
  0.23100000   2.20147699
  0.23100000   2.20147575
  0.23100000   2.20147457
  0.23100000   2.20147345
  0.23100000   2.20147239
  0.23100000   2.20147137
  0.23120000   2.20215770
  0.23120000   2.20215365
  0.23120000   2.20214996
  0.23120000   2.20214659
  0.23120000   2.20214349
  0.23120000   2.20214063
  0.23120000   2.20213799
  0.23120000   2.20213555
  0.23120000   2.20213327
  0.23120000   2.20213115
  0.23120000   2.20212917
  0.23120000   2.20212731
  0.23120000   2.20212556
  0.23120000   2.20212392
  0.23120000   2.20212237
  0.23120000   2.20212091
  0.23120000   2.20211953
  0.23120000   2.20211822
  0.23120000   2.20211698
  0.23120000   2.20211579
  0.23120000   2.20211467
  0.23120000   2.20211360
  0.23120000   2.20211258
  0.23140000   2.20279574
  0.23140000   2.20279169
  0.23140000   2.20278799
  0.23140000   2.20278462
  0.23140000   2.20278152
  0.23140000   2.20277866
  0.23140000   2.20277602
  0.23140000   2.20277357
  0.23140000   2.20277129
  0.23140000   2.20276917
  0.23140000   2.20276718
  0.23140000   2.20276532
  0.23140000   2.20276357
  0.23140000   2.20276193
  0.23140000   2.20276038
  0.23140000   2.20275892
  0.23140000   2.20275753
  0.23140000   2.20275622
  0.23140000   2.20275498
  0.23140000   2.20275379
  0.23140000   2.20275267
  0.23140000   2.20275160
  0.23140000   2.20275058
  0.23160000   2.20343058
  0.23160000   2.20342653
  0.23160000   2.20342283
  0.23160000   2.20341945
  0.23160000   2.20341635
  0.23160000   2.20341349
  0.23160000   2.20341085
  0.23160000   2.20340840
  0.23160000   2.20340612
  0.23160000   2.20340399
  0.23160000   2.20340200
  0.23160000   2.20340014
  0.23160000   2.20339839
  0.23160000   2.20339674
  0.23160000   2.20339519
  0.23160000   2.20339372
  0.23160000   2.20339234
  0.23160000   2.20339103
  0.23160000   2.20338978
  0.23160000   2.20338860
  0.23160000   2.20338747
  0.23160000   2.20338640
  0.23160000   2.20338538
  0.23180000   2.20406226
  0.23180000   2.20405820
  0.23180000   2.20405450
  0.23180000   2.20405112
  0.23180000   2.20404801
  0.23180000   2.20404515
  0.23180000   2.20404251
  0.23180000   2.20404005
  0.23180000   2.20403777
  0.23180000   2.20403564
  0.23180000   2.20403365
  0.23180000   2.20403178
  0.23180000   2.20403003
  0.23180000   2.20402838
  0.23180000   2.20402683
  0.23180000   2.20402536
  0.23180000   2.20402398
  0.23180000   2.20402266
  0.23180000   2.20402141
  0.23180000   2.20402023
  0.23180000   2.20401910
  0.23180000   2.20401803
  0.23180000   2.20401700
  0.23200000   2.20469078
  0.23200000   2.20468672
  0.23200000   2.20468302
  0.23200000   2.20467964
  0.23200000   2.20467653
  0.23200000   2.20467367
  0.23200000   2.20467102
  0.23200000   2.20466856
  0.23200000   2.20466628
  0.23200000   2.20466414
  0.23200000   2.20466215
  0.23200000   2.20466028
  0.23200000   2.20465853
  0.23200000   2.20465688
  0.23200000   2.20465532
  0.23200000   2.20465386
  0.23200000   2.20465247
  0.23200000   2.20465115
  0.23200000   2.20464990
  0.23200000   2.20464871
  0.23200000   2.20464759
  0.23200000   2.20464651
  0.23200000   2.20464548
  0.23220000   2.20531619
  0.23220000   2.20531212
  0.23220000   2.20530842
  0.23220000   2.20530503
  0.23220000   2.20530192
  0.23220000   2.20529906
  0.23220000   2.20529641
  0.23220000   2.20529395
  0.23220000   2.20529166
  0.23220000   2.20528953
  0.23220000   2.20528753
  0.23220000   2.20528566
  0.23220000   2.20528391
  0.23220000   2.20528225
  0.23220000   2.20528070
  0.23220000   2.20527923
  0.23220000   2.20527784
  0.23220000   2.20527652
  0.23220000   2.20527527
  0.23220000   2.20527408
  0.23220000   2.20527295
  0.23220000   2.20527187
  0.23220000   2.20527084
  0.23240000   2.20593849
  0.23240000   2.20593443
  0.23240000   2.20593072
  0.23240000   2.20592733
  0.23240000   2.20592422
  0.23240000   2.20592135
  0.23240000   2.20591870
  0.23240000   2.20591624
  0.23240000   2.20591395
  0.23240000   2.20591181
  0.23240000   2.20590981
  0.23240000   2.20590794
  0.23240000   2.20590619
  0.23240000   2.20590453
  0.23240000   2.20590297
  0.23240000   2.20590150
  0.23240000   2.20590011
  0.23240000   2.20589879
  0.23240000   2.20589753
  0.23240000   2.20589634
  0.23240000   2.20589521
  0.23240000   2.20589413
  0.23240000   2.20589311
  0.23260000   2.20655773
  0.23260000   2.20655366
  0.23260000   2.20654995
  0.23260000   2.20654656
  0.23260000   2.20654344
  0.23260000   2.20654057
  0.23260000   2.20653792
  0.23260000   2.20653545
  0.23260000   2.20653316
  0.23260000   2.20653102
  0.23260000   2.20652902
  0.23260000   2.20652715
  0.23260000   2.20652539
  0.23260000   2.20652373
  0.23260000   2.20652217
  0.23260000   2.20652070
  0.23260000   2.20651930
  0.23260000   2.20651798
  0.23260000   2.20651673
  0.23260000   2.20651554
  0.23260000   2.20651440
  0.23260000   2.20651332
  0.23260000   2.20651229
  0.23280000   2.20717391
  0.23280000   2.20716984
  0.23280000   2.20716613
  0.23280000   2.20716274
  0.23280000   2.20715962
  0.23280000   2.20715674
  0.23280000   2.20715409
  0.23280000   2.20715162
  0.23280000   2.20714933
  0.23280000   2.20714719
  0.23280000   2.20714518
  0.23280000   2.20714331
  0.23280000   2.20714155
  0.23280000   2.20713989
  0.23280000   2.20713832
  0.23280000   2.20713685
  0.23280000   2.20713545
  0.23280000   2.20713413
  0.23280000   2.20713287
  0.23280000   2.20713168
  0.23280000   2.20713054
  0.23280000   2.20712946
  0.23280000   2.20712843
  0.23300000   2.20778707
[truncated: 204,621 more chars]
