# Supplementary material for: Bifurcations of a New Fractional-Order System with a One-Scroll Chaotic Attractor
Source: Hindawi journal article supplement (doi:10.1155/2019/8341514), 2019-01-01
Supplement: f1 [file 8341514.f1.zip › 8341514.f1/a-bifurcationdata/adataq096.dat]

  0.10000000   0.03634595
  0.10000000   0.03173583
  0.10000000   0.02771049
  0.10000000   0.02419574
  0.10000000   0.02112682
  0.10000000   0.01844716
  0.10000000   0.01610740
  0.10000000   0.01406440
  0.10000000   0.01228054
  0.10000000   0.01072295
  0.10000000   0.00936291
  0.10000000   0.00817538
  0.10000000   0.00713847
  0.10000000   0.00623307
  0.10000000   0.00544252
  0.10000000   0.00475223
  0.10000000   0.00414950
  0.10000000   0.00362322
  0.10000000   0.00316368
  0.10000000   0.00276243
  0.10000000   0.00241208
  0.10000000   0.00210616
  0.10000000   0.00183904
  0.10000000   0.00160580
  0.10020000   0.03692503
  0.10020000   0.03226253
  0.10020000   0.02818880
  0.10020000   0.02462948
  0.10020000   0.02151960
  0.10020000   0.01880241
  0.10020000   0.01642832
  0.10020000   0.01435400
  0.10020000   0.01254160
  0.10020000   0.01095805
  0.10020000   0.00957445
  0.10020000   0.00836556
  0.10020000   0.00730930
  0.10020000   0.00638641
  0.10020000   0.00558005
  0.10020000   0.00487551
  0.10020000   0.00425992
  0.10020000   0.00372207
  0.10020000   0.00325212
  0.10020000   0.00284151
  0.10020000   0.00248275
  0.10020000   0.00216928
  0.10020000   0.00189539
  0.10020000   0.00165609
  0.10040000   0.03751333
  0.10040000   0.03279798
  0.10040000   0.02867537
  0.10040000   0.02507099
  0.10040000   0.02191969
  0.10040000   0.01916450
  0.10040000   0.01675564
  0.10040000   0.01464956
  0.10040000   0.01280821
  0.10040000   0.01119832
  0.10040000   0.00979078
  0.10040000   0.00856016
  0.10040000   0.00748422
  0.10040000   0.00654352
  0.10040000   0.00572106
  0.10040000   0.00500198
  0.10040000   0.00437329
  0.10040000   0.00382361
  0.10040000   0.00334303
  0.10040000   0.00292285
  0.10040000   0.00255549
  0.10040000   0.00223430
  0.10040000   0.00195348
  0.10040000   0.00170795
  0.10060000   0.03811101
  0.10060000   0.03334231
  0.10060000   0.02917034
  0.10060000   0.02552042
  0.10060000   0.02232721
  0.10060000   0.01953356
  0.10060000   0.01708948
  0.10060000   0.01495121
  0.10060000   0.01308049
  0.10060000   0.01144385
  0.10060000   0.01001199
  0.10060000   0.00875929
  0.10060000   0.00766333
  0.10060000   0.00670450
  0.10060000   0.00586564
  0.10060000   0.00513174
  0.10060000   0.00448967
  0.10060000   0.00392793
  0.10060000   0.00343648
  0.10060000   0.00300652
  0.10060000   0.00263036
  0.10060000   0.00230126
  0.10060000   0.00201334
  0.10060000   0.00176144
  0.10080000   0.03871821
  0.10080000   0.03389568
  0.10080000   0.02967386
  0.10080000   0.02597791
  0.10080000   0.02274231
  0.10080000   0.01990974
  0.10080000   0.01742997
  0.10080000   0.01525907
  0.10080000   0.01335856
  0.10080000   0.01169477
  0.10080000   0.01023820
  0.10080000   0.00896306
  0.10080000   0.00784673
  0.10080000   0.00686944
  0.10080000   0.00601387
  0.10080000   0.00526487
  0.10080000   0.00460915
  0.10080000   0.00403510
  0.10080000   0.00353255
  0.10080000   0.00309259
  0.10080000   0.00270743
  0.10080000   0.00237024
  0.10080000   0.00207504
  0.10080000   0.00181661
  0.10100000   0.03933508
  0.10100000   0.03445823
  0.10100000   0.03018606
  0.10100000   0.02644359
  0.10100000   0.02316514
  0.10100000   0.02029315
  0.10100000   0.01777725
  0.10100000   0.01557327
  0.10100000   0.01364255
  0.10100000   0.01195119
  0.10100000   0.01046953
  0.10100000   0.00917156
  0.10100000   0.00803452
  0.10100000   0.00703844
  0.10100000   0.00616585
  0.10100000   0.00540145
  0.10100000   0.00473181
  0.10100000   0.00414519
  0.10100000   0.00363130
  0.10100000   0.00318112
  0.10100000   0.00278675
  0.10100000   0.00244128
  0.10100000   0.00213863
  0.10100000   0.00187351
  0.10100000   0.03933508
  0.10100000   0.03445823
  0.10100000   0.03018606
  0.10100000   0.02644359
  0.10100000   0.02316514
  0.10100000   0.02029315
  0.10100000   0.01777725
  0.10100000   0.01557327
  0.10100000   0.01364255
  0.10100000   0.01195119
  0.10100000   0.01046953
  0.10100000   0.00917156
  0.10100000   0.00803452
  0.10100000   0.00703844
  0.10100000   0.00616585
  0.10100000   0.00540145
  0.10100000   0.00473181
  0.10100000   0.00414519
  0.10100000   0.00363130
  0.10100000   0.00318112
  0.10100000   0.00278675
  0.10100000   0.00244128
  0.10100000   0.00213863
  0.10100000   0.00187351
  0.10120000   0.03996178
  0.10120000   0.03503012
  0.10120000   0.03070711
  0.10120000   0.02691763
  0.10120000   0.02359582
  0.10120000   0.02068396
  0.10120000   0.01813145
  0.10120000   0.01589394
  0.10120000   0.01393257
  0.10120000   0.01221324
  0.10120000   0.01070608
  0.10120000   0.00938492
  0.10120000   0.00822680
  0.10120000   0.00721160
  0.10120000   0.00632167
  0.10120000   0.00554157
  0.10120000   0.00485774
  0.10120000   0.00425829
  0.10120000   0.00373282
  0.10120000   0.00327219
  0.10120000   0.00286841
  0.10120000   0.00251445
  0.10120000   0.00220417
  0.10120000   0.00193218
  0.10140000   0.04059846
  0.10140000   0.03561149
  0.10140000   0.03123715
  0.10140000   0.02740016
  0.10140000   0.02403451
  0.10140000   0.02108229
  0.10140000   0.01849271
  0.10140000   0.01622122
  0.10140000   0.01422875
  0.10140000   0.01248103
  0.10140000   0.01094798
  0.10140000   0.00960325
  0.10140000   0.00842369
  0.10140000   0.00738901
  0.10140000   0.00648143
  0.10140000   0.00568533
  0.10140000   0.00498701
  0.10140000   0.00437447
  0.10140000   0.00383717
  0.10140000   0.00336587
  0.10140000   0.00295245
  0.10140000   0.00258982
  0.10140000   0.00227172
  0.10140000   0.00199270
  0.10160000   0.04124528
  0.10160000   0.03620251
  0.10160000   0.03177634
  0.10160000   0.02789134
  0.10160000   0.02448135
  0.10160000   0.02148829
  0.10160000   0.01886116
  0.10160000   0.01655524
  0.10160000   0.01453124
  0.10160000   0.01275469
  0.10160000   0.01119535
  0.10160000   0.00982665
  0.10160000   0.00862529
  0.10160000   0.00757080
  0.10160000   0.00664523
  0.10160000   0.00583282
  0.10160000   0.00511974
  0.10160000   0.00449383
  0.10160000   0.00394444
  0.10160000   0.00346222
  0.10160000   0.00303896
  0.10160000   0.00266744
  0.10160000   0.00234134
  0.10160000   0.00205511
  0.10180000   0.04190240
  0.10180000   0.03680334
  0.10180000   0.03232483
  0.10180000   0.02839133
  0.10180000   0.02493651
  0.10180000   0.02190211
  0.10180000   0.01923696
  0.10180000   0.01689613
  0.10180000   0.01484015
  0.10180000   0.01303436
  0.10180000   0.01144831
  0.10180000   0.01005525
  0.10180000   0.00883171
  0.10180000   0.00775706
  0.10180000   0.00681317
  0.10180000   0.00598414
  0.10180000   0.00525599
  0.10180000   0.00461644
  0.10180000   0.00405472
  0.10180000   0.00356134
  0.10180000   0.00312800
  0.10180000   0.00274740
  0.10180000   0.00241310
  0.10180000   0.00211948
  0.10200000   0.04256999
  0.10200000   0.03741414
  0.10200000   0.03288279
  0.10200000   0.02890028
  0.10200000   0.02540012
  0.10200000   0.02232389
  0.10200000   0.01962024
  0.10200000   0.01724405
  0.10200000   0.01515564
  0.10200000   0.01332016
  0.10200000   0.01170698
  0.10200000   0.01028917
  0.10200000   0.00904308
  0.10200000   0.00794790
  0.10200000   0.00698536
  0.10200000   0.00613939
  0.10200000   0.00539587
  0.10200000   0.00474240
  0.10200000   0.00416807
  0.10200000   0.00366330
  0.10200000   0.00321966
  0.10200000   0.00282975
  0.10200000   0.00248706
  0.10200000   0.00218587
  0.10220000   0.04324821
  0.10220000   0.03803507
  0.10220000   0.03345038
  0.10220000   0.02941835
  0.10220000   0.02587235
  0.10220000   0.02275380
  0.10220000   0.02001117
  0.10220000   0.01759913
  0.10220000   0.01547783
  0.10220000   0.01361223
  0.10220000   0.01197150
  0.10220000   0.01052854
  0.10220000   0.00925951
  0.10220000   0.00814344
  0.10220000   0.00716189
  0.10220000   0.00629866
  0.10220000   0.00553948
  0.10220000   0.00487180
  0.10220000   0.00428460
  0.10220000   0.00376818
  0.10220000   0.00331400
  0.10220000   0.00291457
  0.10220000   0.00256328
  0.10220000   0.00225433
  0.10240000   0.04393723
  0.10240000   0.03866631
  0.10240000   0.03402776
  0.10240000   0.02994570
  0.10240000   0.02635337
  0.10240000   0.02319199
  0.10240000   0.02040988
  0.10240000   0.01796152
  0.10240000   0.01580687
  0.10240000   0.01391070
  0.10240000   0.01224200
  0.10240000   0.01077347
  0.10240000   0.00948112
  0.10240000   0.00834379
  0.10240000   0.00734290
  0.10240000   0.00646207
  0.10240000   0.00568690
  0.10240000   0.00500473
  0.10240000   0.00440439
  0.10240000   0.00387606
  0.10240000   0.00341111
  0.10240000   0.00300193
  0.10240000   0.00264184
  0.10240000   0.00232495
  0.10260000   0.04463723
  0.10260000   0.03930802
  0.10260000   0.03461510
  0.10260000   0.03048251
  0.10260000   0.02684332
  0.10260000   0.02363862
  0.10260000   0.02081653
  0.10260000   0.01833137
  0.10260000   0.01614291
  0.10260000   0.01421572
  0.10260000   0.01251861
  0.10260000   0.01102411
  0.10260000   0.00970803
  0.10260000   0.00854907
  0.10260000   0.00752847
  0.10260000   0.00662972
  0.10260000   0.00583826
  0.10260000   0.00514129
  0.10260000   0.00452752
  0.10260000   0.00398703
  0.10260000   0.00351106
  0.10260000   0.00309192
  0.10260000   0.00272281
  0.10260000   0.00239777
  0.10280000   0.04534837
  0.10280000   0.03996037
  0.10280000   0.03521259
  0.10280000   0.03102894
  0.10280000   0.02734238
  0.10280000   0.02409385
  0.10280000   0.02123129
  0.10280000   0.01870884
  0.10280000   0.01648609
  0.10280000   0.01452742
  0.10280000   0.01280147
  0.10280000   0.01128057
  0.10280000   0.00994037
  0.10280000   0.00875940
  0.10280000   0.00771874
  0.10280000   0.00680172
  0.10280000   0.00599364
  0.10280000   0.00528157
  0.10280000   0.00465410
  0.10280000   0.00410118
  0.10280000   0.00361395
  0.10280000   0.00318460
  0.10280000   0.00280626
  0.10280000   0.00247287
  0.10300000   0.04607084
  0.10300000   0.04062354
  0.10300000   0.03582038
  0.10300000   0.03158516
  0.10300000   0.02785072
  0.10300000   0.02455785
  0.10300000   0.02165431
  0.10300000   0.01909408
  0.10300000   0.01683657
  0.10300000   0.01484597
  0.10300000   0.01309072
  0.10300000   0.01154301
  0.10300000   0.01017828
  0.10300000   0.00897491
  0.10300000   0.00791382
  0.10300000   0.00697818
  0.10300000   0.00615316
  0.10300000   0.00542568
  0.10300000   0.00478422
  0.10300000   0.00421860
  0.10300000   0.00371984
  0.10300000   0.00328006
  0.10300000   0.00289227
  0.10300000   0.00255033
  0.10320000   0.04680481
  0.10320000   0.04129772
  0.10320000   0.03643866
  0.10320000   0.03215135
  0.10320000   0.02836851
  0.10320000   0.02503077
  0.10320000   0.02208576
  0.10320000   0.01948726
  0.10320000   0.01719449
  0.10320000   0.01517149
  0.10320000   0.01338651
  0.10320000   0.01181154
  0.10320000   0.01042188
  0.10320000   0.00919572
  0.10320000   0.00811382
  0.10320000   0.00715922
  0.10320000   0.00631693
  0.10320000   0.00557373
  0.10320000   0.00491798
  0.10320000   0.00433938
  0.10320000   0.00382885
  0.10320000   0.00337839
  0.10320000   0.00298092
  0.10320000   0.00263022
  0.10340000   0.04755046
  0.10340000   0.04198308
  0.10340000   0.03706760
  0.10340000   0.03272769
  0.10340000   0.02889592
  0.10340000   0.02551281
  0.10340000   0.02252581
  0.10340000   0.01988853
  0.10340000   0.01756003
  0.10340000   0.01550416
  0.10340000   0.01368898
  0.10340000   0.01208633
  0.10340000   0.01067131
  0.10340000   0.00942197
  0.10340000   0.00831889
  0.10340000   0.00734496
  0.10340000   0.00648505
  0.10340000   0.00572582
  0.10340000   0.00505548
  0.10340000   0.00446362
  0.10340000   0.00394105
  0.10340000   0.00347966
  0.10340000   0.00307229
  0.10340000   0.00271261
  0.10360000   0.04830799
  0.10360000   0.04267981
  0.10360000   0.03770740
  0.10360000   0.03331435
  0.10360000   0.02943314
  0.10360000   0.02600413
  0.10360000   0.02297462
  0.10360000   0.02029806
  0.10360000   0.01793334
  0.10360000   0.01584412
  0.10360000   0.01399829
  0.10360000   0.01236751
  0.10360000   0.01092672
  0.10360000   0.00965378
  0.10360000   0.00852914
  0.10360000   0.00753552
  0.10360000   0.00665765
  0.10360000   0.00588206
  0.10360000   0.00519682
  0.10360000   0.00459141
  0.10360000   0.00405653
  0.10360000   0.00358397
  0.10360000   0.00316645
  0.10360000   0.00279758
  0.10380000   0.04907758
  0.10380000   0.04338809
  0.10380000   0.03835824
  0.10380000   0.03391153
  0.10380000   0.02998034
  0.10380000   0.02650490
  0.10380000   0.02343237
  0.10380000   0.02071603
  0.10380000   0.01831458
  0.10380000   0.01619153
  0.10380000   0.01431459
  0.10380000   0.01265523
  0.10380000   0.01118823
  0.10380000   0.00989129
  0.10380000   0.00874470
  0.10380000   0.00773102
  0.10380000   0.00683485
  0.10380000   0.00604256
  0.10380000   0.00534212
  0.10380000   0.00472287
  0.10380000   0.00417541
  0.10380000   0.00369141
  0.10380000   0.00326351
  0.10380000   0.00288522
  0.10400000   0.04985943
  0.10400000   0.04410812
  0.10400000   0.03902030
  0.10400000   0.03451940
  0.10400000   0.03053771
  0.10400000   0.02701532
  0.10400000   0.02389924
  0.10400000   0.02114260
  0.10400000   0.01870393
  0.10400000   0.01654656
  0.10400000   0.01463803
  0.10400000   0.01294965
  0.10400000   0.01145601
  0.10400000   0.01013466
  0.10400000   0.00896571
  0.10400000   0.00793160
  0.10400000   0.00701676
  0.10400000   0.00620745
  0.10400000   0.00549148
  0.10400000   0.00485809
  0.10400000   0.00429776
  0.10400000   0.00380206
  0.10400000   0.00336354
  0.10400000   0.00297560
  0.10420000   0.05065371
  0.10420000   0.04484010
  0.10420000   0.03969379
  0.10420000   0.03513817
  0.10420000   0.03110544
  0.10420000   0.02753556
  0.10420000   0.02437541
  0.10420000   0.02157795
  0.10420000   0.01910156
  0.10420000   0.01690938
  0.10420000   0.01496879
  0.10420000   0.01325091
  0.10420000   0.01173020
  0.10420000   0.01038400
  0.10420000   0.00919231
  0.10420000   0.00813738
  0.10420000   0.00720352
  0.10420000   0.00637683
  0.10420000   0.00564502
  0.10420000   0.00499719
  0.10420000   0.00442371
  0.10420000   0.00391604
  0.10420000   0.00346664
  0.10420000   0.00306881
  0.10440000   0.05146065
  0.10440000   0.04558421
  0.10440000   0.04037889
  0.10440000   0.03576803
  0.10440000   0.03168372
  0.10440000   0.02806582
  0.10440000   0.02486106
  0.10440000   0.02202227
  0.10440000   0.01950763
  0.10440000   0.01728015
  0.10440000   0.01530701
  0.10440000   0.01355919
  0.10440000   0.01201094
  0.10440000   0.01063949
  0.10440000   0.00942463
  0.10440000   0.00834850
  0.10440000   0.00739524
  0.10440000   0.00655084
  0.10440000   0.00580285
  0.10440000   0.00514027
  0.10440000   0.00455334
  0.10440000   0.00403344
  0.10440000   0.00357290
  0.10440000   0.00316494
  0.10460000   0.05228042
  0.10460000   0.04634066
  0.10460000   0.04107582
  0.10460000   0.03640917
  0.10460000   0.03227275
  0.10460000   0.02860629
  0.10460000   0.02535639
  0.10460000   0.02247573
  0.10460000   0.01992234
  0.10460000   0.01765905
  0.10460000   0.01565288
  0.10460000   0.01387464
  0.10460000   0.01229841
  0.10460000   0.01090126
  0.10460000   0.00966283
  0.10460000   0.00856510
  0.10460000   0.00759207
  0.10460000   0.00672959
  0.10460000   0.00596509
  0.10460000   0.00528744
  0.10460000   0.00468678
  0.10460000   0.00415435
  0.10460000   0.00368241
  0.10460000   0.00326409
  0.10480000   0.05311325
  0.10480000   0.04710966
  0.10480000   0.04178476
  0.10480000   0.03706180
  0.10480000   0.03287272
  0.10480000   0.02915716
  0.10480000   0.02586159
  0.10480000   0.02293853
  0.10480000   0.02034586
  0.10480000   0.01804625
  0.10480000   0.01600656
  0.10480000   0.01419742
  0.10480000   0.01259276
  0.10480000   0.01116947
  0.10480000   0.00990705
  0.10480000   0.00878732
  0.10480000   0.00779415
  0.10480000   0.00691323
  0.10480000   0.00613187
  0.10480000   0.00543883
  0.10480000   0.00482412
  0.10480000   0.00427889
  0.10480000   0.00379529
  0.10480000   0.00336634
  0.10500000   0.05395933
  0.10500000   0.04789141
  0.10500000   0.04250593
  0.10500000   0.03772612
  0.10500000   0.03348384
  0.10500000   0.02971863
  0.10500000   0.02637685
  0.10500000   0.02341085
  0.10500000   0.02077839
  0.10500000   0.01844195
  0.10500000   0.01636824
  0.10500000   0.01452771
  0.10500000   0.01289415
  0.10500000   0.01144428
  0.10500000   0.01015744
  0.10500000   0.00901530
  0.10500000   0.00800159
  0.10500000   0.00710187
  0.10500000   0.00630332
  0.10500000   0.00559456
  0.10500000   0.00496550
  0.10500000   0.00440717
  0.10500000   0.00391162
  0.10500000   0.00347179
  0.10520000   0.05481888
  0.10520000   0.04868612
  0.10520000   0.04323954
  0.10520000   0.03840234
  0.10520000   0.03410632
  0.10520000   0.03029092
  0.10520000   0.02690237
  0.10520000   0.02389290
  0.10520000   0.02122011
  0.10520000   0.01884632
  0.10520000   0.01673808
  0.10520000   0.01486569
  0.10520000   0.01320276
  0.10520000   0.01172585
  0.10520000   0.01041416
  0.10520000   0.00924920
  0.10520000   0.00821457
  0.10520000   0.00729567
  0.10520000   0.00647956
  0.10520000   0.00575474
  0.10520000   0.00511101
  0.10520000   0.00453929
  0.10520000   0.00403152
  0.10520000   0.00358055
  0.10540000   0.05569210
  0.10540000   0.04949401
  0.10540000   0.04398580
  0.10540000   0.03909067
  0.10540000   0.03474036
  0.10540000   0.03087422
  0.10540000   0.02743835
  0.10540000   0.02438487
  0.10540000   0.02167121
  0.10540000   0.01925955
  0.10540000   0.01711628
  0.10540000   0.01521153
  0.10540000   0.01351875
  0.10540000   0.01201435
  0.10540000   0.01067737
  0.10540000   0.00948917
  0.10540000   0.00843321
  0.10540000   0.00749475
  0.10540000   0.00666073
  0.10540000   0.00591952
  0.10540000   0.00526079
  0.10540000   0.00467537
  0.10540000   0.00415510
  0.10540000   0.00369272
  0.10560000   0.05657923
  0.10560000   0.05031530
  0.10560000   0.04474494
  0.10560000   0.03979133
  0.10560000   0.03538618
  0.10560000   0.03146874
  0.10560000   0.02798501
  0.10560000   0.02488697
  0.10560000   0.02213190
  0.10560000   0.01968185
  0.10560000   0.01750303
  0.10560000   0.01556541
  0.10560000   0.01384230
  0.10560000   0.01230995
  0.10560000   0.01094723
  0.10560000   0.00973537
  0.10560000   0.00865767
  0.10560000   0.00769927
  0.10560000   0.00684696
  0.10560000   0.00608901
  0.10560000   0.00541496
  0.10560000   0.00481553
  0.10560000   0.00428246
  0.10560000   0.00380840
  0.10580000   0.05748047
  0.10580000   0.05115019
  0.10580000   0.04551716
  0.10580000   0.04050455
  0.10580000   0.03604400
  0.10580000   0.03207471
  0.10580000   0.02854256
  0.10580000   0.02539940
  0.10580000   0.02260239
  0.10580000   0.02011340
  0.10580000   0.01789851
  0.10580000   0.01592753
  0.10580000   0.01417360
  0.10580000   0.01261282
  0.10580000   0.01122391
  0.10580000   0.00998795
  0.10580000   0.00888810
  0.10580000   0.00790936
  0.10580000   0.00703840
  0.10580000   0.00626335
  0.10580000   0.00557365
  0.10580000   0.00495990
  0.10580000   0.00441373
  0.10580000   0.00392771
  0.10600000   0.05839605
  0.10600000   0.05199893
  0.10600000   0.04630270
  0.10600000   0.04123054
  0.10600000   0.03671405
  0.10600000   0.03269234
  0.10600000   0.02911121
  0.10600000   0.02592238
  0.10600000   0.02308287
  0.10600000   0.02055441
  0.10600000   0.01830292
  0.10600000   0.01629807
  0.10600000   0.01451283
  0.10600000   0.01292314
  0.10600000   0.01150759
  0.10600000   0.01024709
  0.10600000   0.00912467
  0.10600000   0.00812519
  0.10600000   0.00723520
  0.10600000   0.00644269
  0.10600000   0.00573699
  0.10600000   0.00510860
  0.10600000   0.00454903
  0.10600000   0.00405076
  0.10620000   0.05932619
  0.10620000   0.05286174
  0.10620000   0.04710179
  0.10620000   0.04196953
  0.10620000   0.03739654
  0.10620000   0.03332186
  0.10620000   0.02969118
  0.10620000   0.02645612
  0.10620000   0.02357356
  0.10620000   0.02100509
  0.10620000   0.01871647
  0.10620000   0.01667722
  0.10620000   0.01486017
  0.10620000   0.01324109
  0.10620000   0.01179843
  0.10620000   0.01051295
  0.10620000   0.00936753
  0.10620000   0.00834691
  0.10620000   0.00743750
  0.10620000   0.00662716
  0.10620000   0.00590512
  0.10620000   0.00526175
  0.10620000   0.00468847
  0.10620000   0.00417766
  0.10640000   0.06027114
  0.10640000   0.05373885
  0.10640000   0.04791465
  0.10640000   0.04272175
  0.10640000   0.03809170
  0.10640000   0.03396349
  0.10640000   0.03028271
  0.10640000   0.02700085
  0.10640000   0.02407468
  0.10640000   0.02146564
  0.10640000   0.01913937
  0.10640000   0.01706520
  0.10640000   0.01521582
  0.10640000   0.01356687
  0.10640000   0.01209662
  0.10640000   0.01078571
  0.10640000   0.00961686
  0.10640000   0.00857468
  0.10640000   0.00764545
  0.10640000   0.00681692
  0.10640000   0.00607818
  0.10640000   0.00541949
  0.10640000   0.00483219
  0.10640000   0.00430854
  0.10660000   0.06123112
  0.10660000   0.05463050
  0.10660000   0.04874153
  0.10660000   0.04348745
  0.10660000   0.03879979
  0.10660000   0.03461747
  0.10660000   0.03088601
  0.10660000   0.02755679
  0.10660000   0.02458645
  0.10660000   0.02193629
  0.10660000   0.01957181
  0.10660000   0.01746220
  0.10660000   0.01557999
  0.10660000   0.01390066
  0.10660000   0.01240235
  0.10660000   0.01106554
  0.10660000   0.00987282
  0.10660000   0.00880867
  0.10660000   0.00785922
  0.10660000   0.00701211
  0.10660000   0.00625630
  0.10660000   0.00558197
  0.10660000   0.00498032
  0.10660000   0.00444351
  0.10680000   0.06220637
  0.10680000   0.05553693
  0.10680000   0.04958266
  0.10680000   0.04426685
  0.10680000   0.03952102
  0.10680000   0.03528403
  0.10680000   0.03150132
  0.10680000   0.02812417
  0.10680000   0.02510909
  0.10680000   0.02241726
  0.10680000   0.02001402
  0.10680000   0.01786843
  0.10680000   0.01595287
  0.10680000   0.01424266
  0.10680000   0.01271580
  0.10680000   0.01135263
  0.10680000   0.01013560
  0.10680000   0.00904904
  0.10680000   0.00807896
  0.10680000   0.00721288
  0.10680000   0.00643965
  0.10680000   0.00574931
  0.10680000   0.00513298
  0.10680000   0.00458272
  0.10700000   0.06319713
  0.10700000   0.05645838
  0.10700000   0.05043830
  0.10700000   0.04506022
  0.10700000   0.04025565
  0.10700000   0.03596342
  0.10700000   0.03212888
  0.10700000   0.02870322
  0.10700000   0.02564283
  0.10700000   0.02290877
  0.10700000   0.02046622
  0.10700000   0.01828411
  0.10700000   0.01633467
  0.10700000   0.01459308
  0.10700000   0.01303718
  0.10700000   0.01164717
  0.10700000   0.01040537
  0.10700000   0.00929597
  0.10700000   0.00830485
  0.10700000   0.00741941
  0.10700000   0.00662837
  0.10700000   0.00592168
  0.10700000   0.00529033
  0.10700000   0.00472629
  0.10720000   0.06420365
  0.10720000   0.05739509
  0.10720000   0.05130868
  0.10720000   0.04586778
  0.10720000   0.04100392
  0.10720000   0.03665588
  0.10720000   0.03276894
  0.10720000   0.02929419
  0.10720000   0.02618792
  0.10720000   0.02341105
  0.10720000   0.02092864
  0.10720000   0.01870946
  0.10720000   0.01672560
  0.10720000   0.01495211
  0.10720000   0.01336667
  0.10720000   0.01194935
  0.10720000   0.01068232
  0.10720000   0.00954964
  0.10720000   0.00853706
  0.10720000   0.00763185
  0.10720000   0.00682263
  0.10720000   0.00609921
  0.10720000   0.00545250
  0.10720000   0.00487436
  0.10740000   0.06522618
  0.10740000   0.05834733
  0.10740000   0.05219407
  0.10740000   0.04668981
  0.10740000   0.04176609
  0.10740000   0.03736166
  0.10740000   0.03342173
  0.10740000   0.02989732
  0.10740000   0.02674459
  0.10740000   0.02392433
  0.10740000   0.02140149
  0.10740000   0.01914470
  0.10740000   0.01712589
  0.10740000   0.01531997
  0.10740000   0.01370450
  0.10740000   0.01225937
  0.10740000   0.01096664
  0.10740000   0.00981023
  0.10740000   0.00877576
  0.10740000   0.00785037
  0.10740000   0.00702257
  0.10740000   0.00628206
  0.10740000   0.00561964
  0.10740000   0.00502706
  0.10760000   0.06626497
  0.10760000   0.05931535
  0.10760000   0.05309471
  0.10760000   0.04752656
  0.10760000   0.04254241
  0.10760000   0.03808102
  0.10760000   0.03408753
  0.10760000   0.03051286
  0.10760000   0.02731308
  0.10760000   0.02444887
  0.10760000   0.02188503
  0.10760000   0.01959006
  0.10760000   0.01753576
  0.10760000   0.01569689
  0.10760000   0.01405085
  0.10760000   0.01257743
  0.10760000   0.01125853
  0.10760000   0.01007793
  0.10760000   0.00902113
  0.10760000   0.00807515
  0.10760000   0.00722838
  0.10760000   0.00647040
  0.10760000   0.00579190
  0.10760000   0.00518455
  0.10780000   0.06732028
  0.10780000   0.06029941
  0.10780000   0.05401088
  0.10780000   0.04837828
  0.10780000   0.04333315
  0.10780000   0.03881422
  0.10780000   0.03476657
  0.10780000   0.03114106
  0.10780000   0.02789365
  0.10780000   0.02498490
  0.10780000   0.02237948
  0.10780000   0.02004577
  0.10780000   0.01795543
  0.10780000   0.01608307
  0.10780000   0.01440596
  0.10780000   0.01290375
  0.10780000   0.01155818
  0.10780000   0.01035293
  0.10780000   0.00927336
  0.10780000   0.00830637
  0.10780000   0.00744021
  0.10780000   0.00666438
  0.10780000   0.00596944
  0.10780000   0.00534698
  0.10800000   0.06839237
  0.10800000   0.06129977
  0.10800000   0.05494284
  0.10800000   0.04924525
  0.10800000   0.04413858
  0.10800000   0.03956152
  0.10800000   0.03545914
  0.10800000   0.03178219
  0.10800000   0.02848655
  0.10800000   0.02553267
  0.10800000   0.02288510
  0.10800000   0.02051208
  0.10800000   0.01838514
  0.10800000   0.01647875
  0.10800000   0.01477004
  0.10800000   0.01323852
  0.10800000   0.01186581
  0.10800000   0.01063543
  0.10800000   0.00953264
  0.10800000   0.00854420
  0.10800000   0.00765825
  0.10800000   0.00686417
  0.10800000   0.00615243
  0.10800000   0.00551449
  0.10820000   0.06948150
  0.10820000   0.06231670
  0.10820000   0.05589086
  0.10820000   0.05012773
  0.10820000   0.04495895
  0.10820000   0.04032319
  0.10820000   0.03616548
  0.10820000   0.03243650
  0.10820000   0.02909204
  0.10820000   0.02609244
  0.10820000   0.02340214
  0.10820000   0.02098924
  0.10820000   0.01882513
  0.10820000   0.01688416
  0.10820000   0.01514332
  0.10820000   0.01358198
  0.10820000   0.01218162
  0.10820000   0.01092565
  0.10820000   0.00979917
  0.10820000   0.00878885
  0.10820000   0.00788269
  0.10820000   0.00706996
  0.10820000   0.00634103
  0.10820000   0.00568725
  0.10840000   0.07058795
  0.10840000   0.06335047
  0.10840000   0.05685521
  0.10840000   0.05102602
  0.10840000   0.04579456
  0.10840000   0.04109952
  0.10840000   0.03688589
  0.10840000   0.03310428
  0.10840000   0.02971040
  0.10840000   0.02666449
  0.10840000   0.02393085
  0.10840000   0.02147749
  0.10840000   0.01927565
  0.10840000   0.01729954
  0.10840000   0.01552603
  0.10840000   0.01393435
  0.10840000   0.01250584
  0.10840000   0.01122378
  0.10840000   0.01007316
  0.10840000   0.00904049
  0.10840000   0.00811370
  0.10840000   0.00728191
  0.10840000   0.00653540
  0.10840000   0.00586542
  0.10860000   0.07171199
  0.10860000   0.06440137
  0.10860000   0.05783618
  0.10860000   0.05194038
  0.10860000   0.04664568
  0.10860000   0.04189078
  0.10860000   0.03762063
  0.10860000   0.03378579
  0.10860000   0.03034189
  0.10860000   0.02724906
  0.10860000   0.02447151
  0.10860000   0.02197709
  0.10860000   0.01973694
  0.10860000   0.01772514
  0.10860000   0.01591841
  0.10860000   0.01429585
  0.10860000   0.01283868
  0.10860000   0.01153004
  0.10860000   0.01035480
  0.10860000   0.00929934
  0.10860000   0.00835148
  0.10860000   0.00750022
  0.10860000   0.00673574
  0.10860000   0.00604918
  0.10880000   0.07285389
  0.10880000   0.06546967
  0.10880000   0.05883405
  0.10880000   0.05287110
  0.10880000   0.04751260
  0.10880000   0.04269725
  0.10880000   0.03836999
  0.10880000   0.03448132
  0.10880000   0.03098679
  0.10880000   0.02784644
  0.10880000   0.02502436
  0.10880000   0.02248830
  0.10880000   0.02020927
  0.10880000   0.01816120
  0.10880000   0.01632070
  0.10880000   0.01466673
  0.10880000   0.01318038
  0.10880000   0.01184466
  0.10880000   0.01064431
  0.10880000   0.00956561
  0.10880000   0.00859622
  0.10880000   0.00772508
  0.10880000   0.00694221
  0.10880000   0.00623869
  0.10900000   0.07401395
  0.10900000   0.06655566
  0.10900000   0.05984911
  0.10900000   0.05381847
  0.10900000   0.04839561
  0.10900000   0.04351923
  0.10900000   0.03913426
  0.10900000   0.03519116
  0.10900000   0.03164539
  0.10900000   0.02845691
  0.10900000   0.02558970
  0.10900000   0.02301140
  0.10900000   0.02069289
  0.10900000   0.01860799
  0.10900000   0.01673316
  0.10900000   0.01504723
  0.10900000   0.01353117
  0.10900000   0.01216786
  0.10900000   0.01094192
  0.10900000   0.00983949
  0.10900000   0.00884814
  0.10900000   0.00795667
  0.10900000   0.00715502
  0.10900000   0.00643414
  0.10920000   0.07519244
  0.10920000   0.06765964
  0.10920000   0.06088165
  0.10920000   0.05478280
  0.10920000   0.04929501
  0.10920000   0.04435702
  0.10920000   0.03991374
  0.10920000   0.03591559
  0.10920000   0.03231797
  0.10920000   0.02908074
  0.10920000   0.02616780
  0.10920000   0.02354666
  0.10920000   0.02118808
  0.10920000   0.01906576
  0.10920000   0.01715603
  0.10920000   0.01543760
  0.10920000   0.01389129
  0.10920000   0.01249988
  0.10920000   0.01124784
  0.10920000   0.01012121
  0.10920000   0.00910744
  0.10920000   0.00819520
  0.10920000   0.00737435
  0.10920000   0.00663571
  0.10940000   0.07638966
  0.10940000   0.06878189
  0.10940000   0.06193198
  0.10940000   0.05576438
  0.10940000   0.05021110
  0.10940000   0.04521092
  0.10940000   0.04070873
  0.10940000   0.03665492
  0.10940000   0.03300483
  0.10940000   0.02971825
  0.10940000   0.02675896
  0.10940000   0.02409436
  0.10940000   0.02169511
  0.10940000   0.01953479
  0.10940000   0.01758959
  0.10940000   0.01583809
  0.10940000   0.01426100
  0.10940000   0.01284096
  0.10940000   0.01156232
  0.10940000   0.01041100
  0.10940000   0.00937433
  0.10940000   0.00844089
  0.10940000   0.00760039
  0.10940000   0.00684359
  0.10960000   0.07760590
  0.10960000   0.06992272
  0.10960000   0.06300040
  0.10960000   0.05676352
  0.10960000   0.05114419
  0.10960000   0.04608123
  0.10960000   0.04151953
  0.10960000   0.03740946
  0.10960000   0.03370628
  0.10960000   0.03036971
  0.10960000   0.02736345
  0.10960000   0.02465479
  0.10960000   0.02221427
  0.10960000   0.02001534
  0.10960000   0.01803409
  0.10960000   0.01624896
  0.10960000   0.01464054
  0.10960000   0.01319133
  0.10960000   0.01188558
  0.10960000   0.01070909
  0.10960000   0.00964905
  0.10960000   0.00869394
  0.10960000   0.00783337
  0.10960000   0.00705799
  0.10980000   0.07884146
  0.10980000   0.07108244
  0.10980000   0.06408721
  0.10980000   0.05778053
  0.10980000   0.05209460
  0.10980000   0.04696827
  0.10980000   0.04234647
  0.10980000   0.03817951
  0.10980000   0.03442262
  0.10980000   0.03103545
  0.10980000   0.02798159
  0.10980000   0.02522825
  0.10980000   0.02274585
  0.10980000   0.02050772
  0.10980000   0.01848982
  0.10980000   0.01667049
  0.10980000   0.01503018
  0.10980000   0.01355127
  0.10980000   0.01221788
  0.10980000   0.01101570
  0.10980000   0.00993181
  0.10980000   0.00895457
  0.10980000   0.00807349
  0.10980000   0.00727910
  0.11000000   0.08009666
  0.11000000   0.07226136
  0.11000000   0.06519274
  0.11000000   0.05881574
  0.11000000   0.05306264
  0.11000000   0.04787237
  0.11000000   0.04318985
  0.11000000   0.03896539
  0.11000000   0.03515417
  0.11000000   0.03171576
  0.11000000   0.02861369
  0.11000000   0.02581504
  0.11000000   0.02329013
  0.11000000   0.02101219
  0.11000000   0.01895706
  0.11000000   0.01710295
  0.11000000   0.01543018
  0.11000000   0.01392102
  0.11000000   0.01255947
  0.11000000   0.01133109
  0.11000000   0.01022286
  0.11000000   0.00922301
  0.11000000   0.00832096
  0.11000000   0.00750714
  0.11020000   0.08137179
  0.11020000   0.07345979
  0.11020000   0.06631731
  0.11020000   0.05986946
  0.11020000   0.05404864
  0.11020000   0.04879384
  0.11020000   0.04405001
  0.11020000   0.03976743
  0.11020000   0.03590125
  0.11020000   0.03241098
  0.11020000   0.02926004
  0.11020000   0.02641546
  0.11020000   0.02384743
  0.11020000   0.02152907
  0.11020000   0.01943611
  0.11020000   0.01754661
  0.11020000   0.01584082
  0.11020000   0.01430086
  0.11020000   0.01291060
  0.11020000   0.01165551
  0.11020000   0.01052243
  0.11020000   0.00949950
  0.11020000   0.00857602
  0.11020000   0.00774232
  0.11040000   0.08266717
  0.11040000   0.07467805
  0.11040000   0.06746124
  0.11040000   0.06094202
  0.11040000   0.05505293
  0.11040000   0.04973303
  0.11040000   0.04492727
  0.11040000   0.04058596
  0.11040000   0.03666419
  0.11040000   0.03312141
  0.11040000   0.02992099
  0.11040000   0.02702983
  0.11040000   0.02441806
  0.11040000   0.02205866
  0.11040000   0.01992724
  0.11040000   0.01800179
  0.11040000   0.01626238
  0.11040000   0.01469105
  0.11040000   0.01327155
  0.11040000   0.01198921
  0.11040000   0.01083078
  0.11040000   0.00978428
  0.11040000   0.00883890
  0.11040000   0.00798486
  0.11060000   0.08398313
  0.11060000   0.07591647
  0.11060000   0.06862486
  0.11060000   0.06203377
  0.11060000   0.05607585
  0.11060000   0.05069026
  0.11060000   0.04582198
  0.11060000   0.04142131
  0.11060000   0.03744332
  0.11060000   0.03384740
  0.11060000   0.03059685
  0.11060000   0.02765849
  0.11060000   0.02500232
  0.11060000   0.02260126
  0.11060000   0.02043079
  0.11060000   0.01846876
  0.11060000   0.01669516
  0.11060000   0.01509189
  0.11060000   0.01364258
  0.11060000   0.01233246
  0.11060000   0.01114816
  0.11060000   0.01007759
  0.11060000   0.00910983
  0.11060000   0.00823501
  0.11080000   0.08531999
  0.11080000   0.07717538
  0.11080000   0.06980851
  0.11080000   0.06314503
  0.11080000   0.05711775
  0.11080000   0.05166589
  0.11080000   0.04673448
  0.11080000   0.04227384
  0.11080000   0.03823899
  0.11080000   0.03458929
  0.11080000   0.03128796
  0.11080000   0.02830174
  0.11080000   0.02560056
  0.11080000   0.02315720
  0.11080000   0.02094704
  0.11080000   0.01894784
  0.11080000   0.01713944
  0.11080000   0.01550365
  0.11080000   0.01402398
  0.11080000   0.01268554
  0.11080000   0.01147484
  0.11080000   0.01037969
  0.11080000   0.00938906
  0.11080000   0.00849298
  0.11100000   0.08667807
  0.11100000   0.07845513
  0.11100000   0.07101253
  0.11100000   0.06427616
  0.11100000   0.05817897
  0.11100000   0.05266026
  0.11100000   0.04766513
  0.11100000   0.04314388
  0.11100000   0.03905154
  0.11100000   0.03534742
  0.11100000   0.03199466
  0.11100000   0.02895995
  0.11100000   0.02621310
  0.11100000   0.02372680
  0.11100000   0.02147633
  0.11100000   0.01943933
  0.11100000   0.01759555
  0.11100000   0.01592665
  0.11100000   0.01441604
  0.11100000   0.01304872
  0.11100000   0.01181109
  0.11100000   0.01069084
  0.11100000   0.00967685
  0.11100000   0.00875904
  0.11120000   0.08805771
  0.11120000   0.07975604
  0.11120000   0.07223727
  0.11120000   0.06542752
  0.11120000   0.05925987
  0.11120000   0.05367374
  0.11120000   0.04861428
  0.11120000   0.04403181
  0.11120000   0.03988134
  0.11120000   0.03612214
  0.11120000   0.03271731
  0.11120000   0.02963344
  0.11120000   0.02684027
  0.11120000   0.02431040
  0.11120000   0.02201899
  0.11120000   0.01994357
  0.11120000   0.01806378
  0.11120000   0.01636117
  0.11120000   0.01481905
  0.11120000   0.01342229
  0.11120000   0.01215718
  0.11120000   0.01101132
  0.11120000   0.00997346
  0.11120000   0.00903342
  0.11140000   0.08945925
  0.11140000   0.08107846
  0.11140000   0.07348309
  0.11140000   0.06659945
  0.11140000   0.06036081
  0.11140000   0.05470669
  0.11140000   0.04958230
  0.11140000   0.04493798
  0.11140000   0.04072875
  0.11140000   0.03691382
  0.11140000   0.03345626
  0.11140000   0.03032259
  0.11140000   0.02748244
  0.11140000   0.02490834
  0.11140000   0.02257534
  0.11140000   0.02046088
  0.11140000   0.01854446
  0.11140000   0.01680755
  0.11140000   0.01523333
  0.11140000   0.01380655
  0.11140000   0.01251341
  0.11140000   0.01134140
  0.11140000   0.01027915
  0.11140000   0.00931640
  0.11160000   0.09088303
  0.11160000   0.08242276
  0.11160000   0.07475034
  0.11160000   0.06779233
  0.11160000   0.06148217
  0.11160000   0.05575949
  0.11160000   0.05056956
  0.11160000   0.04586277
  0.11160000   0.04159413
  0.11160000   0.03772283
  0.11160000   0.03421189
  0.11160000   0.03102774
  0.11160000   0.02813996
  0.11160000   0.02552097
  0.11160000   0.02314574
  0.11160000   0.02099159
  0.11160000   0.01903793
  0.11160000   0.01726610
  0.11160000   0.01565917
  0.11160000   0.01420181
  0.11160000   0.01288008
  0.11160000   0.01168136
  0.11160000   0.01059421
  0.11160000   0.00960824
  0.11180000   0.09232942
  0.11180000   0.08378929
  0.11180000   0.07603939
  0.11180000   0.06900653
  0.11180000   0.06262431
  0.11180000   0.05683250
  0.11180000   0.05157645
  0.11180000   0.04680657
  0.11180000   0.04247788
  0.11180000   0.03854955
  0.11180000   0.03498455
  0.11180000   0.03174927
  0.11180000   0.02881319
  0.11180000   0.02614866
  0.11180000   0.02373054
  0.11180000   0.02153605
  0.11180000   0.01954451
  0.11180000   0.01773714
  0.11180000   0.01609692
  0.11180000   0.01460837
  0.11180000   0.01325748
  0.11180000   0.01203152
  0.11180000   0.01091892
  0.11180000   0.00990922
  0.11200000   0.09379875
  0.11200000   0.08517842
  0.11200000   0.07735062
  0.11200000   0.07024243
  0.11200000   0.06378763
  0.11200000   0.05792612
  0.11200000   0.05260334
  0.11200000   0.04776975
  0.11200000   0.04338037
  0.11200000   0.03939436
  0.11200000   0.03577465
  0.11200000   0.03248755
  0.11200000   0.02950251
  0.11200000   0.02679177
  0.11200000   0.02433010
  0.11200000   0.02209463
  0.11200000   0.02006457
  0.11200000   0.01822103
  0.11200000   0.01654689
  0.11200000   0.01502657
  0.11200000   0.01364594
  0.11200000   0.01239216
  0.11200000   0.01125359
  0.11200000   0.01021962
  0.11220000   0.09529140
  0.11220000   0.08659050
  0.11220000   0.07868440
  0.11220000   0.07150041
  0.11220000   0.06497251
  0.11220000   0.05904075
  0.11220000   0.05365065
  0.11220000   0.04875272
  0.11220000   0.04430201
  0.11220000   0.04025766
  0.11220000   0.03658256
  0.11220000   0.03324299
  0.11220000   0.03020831
  0.11220000   0.02745068
  0.11220000   0.02494480
  0.11220000   0.02266768
  0.11220000   0.02059845
  0.11220000   0.01871811
  0.11220000   0.01700943
  0.11220000   0.01545673
  0.11220000   0.01404577
  0.11220000   0.01276361
  0.11220000   0.01159850
  0.11220000   0.01053974
  0.11240000   0.09680772
  0.11240000   0.08802594
  0.11240000   0.08004112
  0.11240000   0.07278086
  0.11240000   0.06617935
  0.11240000   0.06017677
  0.11240000   0.05471876
  0.11240000   0.04975588
  0.11240000   0.04524319
  0.11240000   0.04113984
  0.11240000   0.03740869
  0.11240000   0.03401596
  0.11240000   0.03093096
  0.11240000   0.02812577
  0.11240000   0.02557500
  0.11240000   0.02325558
  0.11240000   0.02114652
  0.11240000   0.01922874
  0.11240000   0.01748489
  0.11240000   0.01589919
  0.11240000   0.01445730
  0.11240000   0.01314619
  0.11240000   0.01195397
  0.11240000   0.01086989
  0.11260000   0.09834810
  0.11260000   0.08948509
  0.11260000   0.08142116
  0.11260000   0.07408418
  0.11260000   0.06740855
  0.11260000   0.06133461
  0.11260000   0.05580810
  0.11260000   0.05077964
  0.11260000   0.04620433
  0.11260000   0.04204133
  0.11260000   0.03825345
  0.11260000   0.03480689
  0.11260000   0.03167089
  0.11260000   0.02881745
  0.11260000   0.02622111
  0.11260000   0.02385871
  0.11260000   0.02170916
  0.11260000   0.01975328
  0.11260000   0.01797363
  0.11260000   0.01635431
  0.11260000   0.01488089
  0.11260000   0.01354022
  0.11260000   0.01232034
  0.11260000   0.01121036
  0.11280000   0.09991291
  0.11280000   0.09096837
  0.11280000   0.08282494
  0.11280000   0.07541078
  0.11280000   0.06866053
  0.11280000   0.06251468
  0.11280000   0.05691908
  0.11280000   0.05182443
  0.11280000   0.04718586
  0.11280000   0.04296253
  0.11280000   0.03911726
  0.11280000   0.03561618
  0.11280000   0.03242849
  0.11280000   0.02952612
  0.11280000   0.02688353
  0.11280000   0.02447747
  0.11280000   0.02228676
  0.11280000   0.02029213
  0.11280000   0.01847602
  0.11280000   0.01682245
  0.11280000   0.01531688
  0.11280000   0.01394606
  0.11280000   0.01269793
  0.11280000   0.01156150
  0.11300000   0.10150253
  0.11300000   0.09247615
  0.11300000   0.08425284
  0.11300000   0.07676108
  0.11300000   0.06993570
  0.11300000   0.06371740
  0.11300000   0.05805212
  0.11300000   0.05289067
  0.11300000   0.04818820
  0.11300000   0.04390389
  0.11300000   0.04000054
  0.11300000   0.03644426
  0.11300000   0.03320418
  0.11300000   0.03025219
  0.11300000   0.02756266
  0.11300000   0.02511225
  0.11300000   0.02287971
  0.11300000   0.02084565
  0.11300000   0.01899244
  0.11300000   0.01730398
  0.11300000   0.01576563
  0.11300000   0.01436405
  0.11300000   0.01308708
  0.11300000   0.01192363
  0.11320000   0.10311735
  0.11320000   0.09400884
  0.11320000   0.08570529
  0.11320000   0.07813548
  0.11320000   0.07123450
  0.11320000   0.06494320
  0.11320000   0.05920767
  0.11320000   0.05397880
  0.11320000   0.04921179
  0.11320000   0.04486584
  0.11320000   0.04090373
  0.11320000   0.03729156
  0.11320000   0.03399841
  0.11320000   0.03099609
  0.11320000   0.02825892
  0.11320000   0.02576348
  0.11320000   0.02348842
  0.11320000   0.02141426
  0.11320000   0.01952328
  0.11320000   0.01779928
  0.11320000   0.01622752
  0.11320000   0.01479457
  0.11320000   0.01348815
  0.11320000   0.01229710
  0.11340000   0.10475777
  0.11340000   0.09556685
  0.11340000   0.08718270
  0.11340000   0.07953442
  0.11340000   0.07255735
  0.11340000   0.06619252
  0.11340000   0.06038617
  0.11340000   0.05508927
  0.11340000   0.05025708
  0.11340000   0.04584882
  0.11340000   0.04182728
  0.11340000   0.03815853
  0.11340000   0.03481160
  0.11340000   0.03175826
  0.11340000   0.02897275
  0.11340000   0.02643158
  0.11340000   0.02411330
  0.11340000   0.02199837
  0.11340000   0.02006894
  0.11340000   0.01830874
  0.11340000   0.01670294
  0.11340000   0.01523797
  0.11340000   0.01390150
  0.11340000   0.01268225
  0.11360000   0.10642420
  0.11360000   0.09715059
  0.11360000   0.08868550
  0.11360000   0.08095834
  0.11360000   0.07390470
  0.11360000   0.06746582
  0.11360000   0.06158808
  0.11360000   0.05622253
  0.11360000   0.05132453
  0.11360000   0.04685330
  0.11360000   0.04277165
  0.11360000   0.03904562
  0.11360000   0.03564421
  0.11360000   0.03253915
  0.11360000   0.02970459
  0.11360000   0.02711698
  0.11360000   0.02475479
  0.11360000   0.02259839
  0.11360000   0.02062984
  0.11360000   0.01883278
  0.11360000   0.01719226
  0.11360000   0.01569466
  0.11360000   0.01432751
  0.11360000   0.01307946
  0.11380000   0.10811703
  0.11380000   0.09876049
  0.11380000   0.09021412
  0.11380000   0.08240767
  0.11380000   0.07527700
  0.11380000   0.06876355
  0.11380000   0.06281384
  0.11380000   0.05737906
  0.11380000   0.05241460
  0.11380000   0.04787974
  0.11380000   0.04373730
  0.11380000   0.03995330
  0.11380000   0.03649671
  0.11380000   0.03333920
  0.11380000   0.03045489
  0.11380000   0.02782013
  0.11380000   0.02541333
  0.11380000   0.02321475
  0.11380000   0.02120640
  0.11380000   0.01937179
  0.11380000   0.01769591
  0.11380000   0.01616502
  0.11380000   0.01476657
  0.11380000   0.01348910
  0.11400000   0.10983668
  0.11400000   0.10039697
  0.11400000   0.09176900
  0.11400000   0.08388287
  0.11400000   0.07667471
  0.11400000   0.07008617
  0.11400000   0.06406394
  0.11400000   0.05855932
  0.11400000   0.05352777
  0.11400000   0.04892863
  0.11400000   0.04472471
  0.11400000   0.04088204
  0.11400000   0.03736956
  0.11400000   0.03415890
  0.11400000   0.03122411
  0.11400000   0.02854149
  0.11400000   0.02608936
  0.11400000   0.02384791
  0.11400000   0.02179905
  0.11400000   0.01992622
  0.11400000   0.01821430
  0.11400000   0.01664946
  0.11400000   0.01521906
  0.11400000   0.01391156
  0.11420000   0.11158358
  0.11420000   0.10206046
  0.11420000   0.09335058
  0.11420000   0.08538439
  0.11420000   0.07809829
  0.11420000   0.07143416
  0.11420000   0.06533886
  0.11420000   0.05976379
  0.11420000   0.05466453
  0.11420000   0.05000044
  0.11420000   0.04573437
  0.11420000   0.04183233
  0.11420000   0.03826325
  0.11420000   0.03499872
  0.11420000   0.03201273
  0.11420000   0.02928152
  0.11420000   0.02678335
  0.11420000   0.02449832
  0.11420000   0.02240825
  0.11420000   0.02049650
  0.11420000   0.01874786
  0.11420000   0.01714841
  0.11420000   0.01568541
  0.11420000   0.01434724
  0.11440000   0.11335815
  0.11440000   0.10375142
  0.11440000   0.09495933
  0.11440000   0.08691269
  0.11440000   0.07954822
  0.11440000   0.07280800
  0.11440000   0.06663908
  0.11440000   0.06099298
  0.11440000   0.05582537
  0.11440000   0.05109568
  0.11440000   0.04676677
  0.11440000   0.04280467
  0.11440000   0.03917828
  0.11440000   0.03585915
  0.11440000   0.03282124
  0.11440000   0.03004072
  0.11440000   0.02749577
  0.11440000   0.02516644
  0.11440000   0.02303445
  0.11440000   0.02108308
  0.11440000   0.01929703
  0.11440000   0.01766229
  0.11440000   0.01616604
  0.11440000   0.01479655
  0.11460000   0.11516082
  0.11460000   0.10547028
  0.11460000   0.09659570
  0.11460000   0.08846826
  0.11460000   0.08102498
  0.11460000   0.07420819
  0.11460000   0.06796510
  0.11460000   0.06224739
  0.11460000   0.05701081
  0.11460000   0.05221486
  0.11460000   0.04782243
  0.11460000   0.04379956
  0.11460000   0.04011515
  0.11460000   0.03674070
  0.11460000   0.03365014
  0.11460000   0.03081957
  0.11460000   0.02822712
  0.11460000   0.02585276
  0.11460000   0.02367813
  0.11460000   0.02168643
  0.11460000   0.01986227
  0.11460000   0.01819156
  0.11460000   0.01666138
  0.11460000   0.01525992
  0.11480000   0.11699203
  0.11480000   0.10721750
  0.11480000   0.09826016
  0.11480000   0.09005158
  0.11480000   0.08252907
  0.11480000   0.07563522
  0.11480000   0.06931743
  0.11480000   0.06352752
  0.11480000   0.05822136
  0.11480000   0.05335849
  0.11480000   0.04890187
  0.11480000   0.04481753
  0.11480000   0.04107437
  0.11480000   0.03764388
  0.11480000   0.03449993
  0.11480000   0.03161858
  0.11480000   0.02897790
  0.11480000   0.02655777
  0.11480000   0.02433977
  0.11480000   0.02230703
  0.11480000   0.02044405
  0.11480000   0.01873667
  0.11480000   0.01717189
  0.11480000   0.01573779
  0.11500000   0.11885224
  0.11500000   0.10899354
  0.11500000   0.09995319
  0.11500000   0.09166313
  0.11500000   0.08406098
  0.11500000   0.07708960
  0.11500000   0.07069659
  0.11500000   0.06483391
  0.11500000   0.05945754
  0.11500000   0.05452711
  0.11500000   0.05000561
  0.11500000   0.04585911
  0.11500000   0.04205649
  0.11500000   0.03856922
  0.11500000   0.03537115
  0.11500000   0.03243828
  0.11500000   0.02974861
  0.11500000   0.02728198
  0.11500000   0.02501988
  0.11500000   0.02294536
  0.11500000   0.02104285
  0.11500000   0.01929810
  0.11500000   0.01769802
  0.11500000   0.01623061
  0.11520000   0.12074189
  0.11520000   0.11079889
  0.11520000   0.10167528
  0.11520000   0.09330341
  0.11520000   0.08562124
  0.11520000   0.07857186
  0.11520000   0.07210310
  0.11520000   0.06616709
  0.11520000   0.06071990
  0.11520000   0.05572126
  0.11520000   0.05113421
  0.11520000   0.04692484
  0.11520000   0.04306204
  0.11520000   0.03951727
  0.11520000   0.03626433
  0.11520000   0.03327918
  0.11520000   0.03053979
  0.11520000   0.02802590
  0.11520000   0.02571896
  0.11520000   0.02360193
  0.11520000   0.02165917
  0.11520000   0.01987633
  0.11520000   0.01824025
  0.11520000   0.01673884
  0.11540000   0.12266144
  0.11540000   0.11263400
  0.11540000   0.10342691
  0.11540000   0.09497293
  0.11540000   0.08721034
  0.11540000   0.08008253
  0.11540000   0.07353751
  0.11540000   0.06752760
  0.11540000   0.06200899
  0.11540000   0.05694150
  0.11540000   0.05228822
  0.11540000   0.04801529
  0.11540000   0.04409159
  0.11540000   0.04048857
  0.11540000   0.03718001
  0.11540000   0.03414185
  0.11540000   0.03135197
  0.11540000   0.02879008
  0.11540000   0.02643755
  0.11540000   0.02427727
  0.11540000   0.02229351
  0.11540000   0.02047187
  0.11540000   0.01879907
  0.11540000   0.01726298
  0.11560000   0.12461136
  0.11560000   0.11449937
  0.11560000   0.10520860
  0.11560000   0.09667221
  0.11560000   0.08882884
  0.11560000   0.08162214
  0.11560000   0.07500037
  0.11560000   0.06891600
  0.11560000   0.06332537
  0.11560000   0.05818839
  0.11560000   0.05346821
  0.11560000   0.04913101
  0.11560000   0.04514569
  0.11560000   0.04148370
  0.11560000   0.03811878
  0.11560000   0.03502684
  0.11560000   0.03218572
  0.11560000   0.02957507
  0.11560000   0.02717619
  0.11560000   0.02497190
  0.11560000   0.02294641
  0.11560000   0.02108522
  0.11560000   0.01937500
  0.11560000   0.01780350
  0.11580000   0.12659213
  0.11580000   0.11639550
  0.11580000   0.10702085
  0.11580000   0.09840177
  0.11580000   0.09047726
  0.11580000   0.08319125
  0.11580000   0.07649223
  0.11580000   0.07033285
  0.11580000   0.06466961
  0.11580000   0.05946250
  0.11580000   0.05467476
  0.11580000   0.05027260
  0.11580000   0.04622494
  0.11580000   0.04250323
  0.11580000   0.03908120
  0.11580000   0.03593472
  0.11580000   0.03304160
  0.11580000   0.03038142
  0.11580000   0.02793543
  0.11580000   0.02568637
  0.11580000   0.02361840
  0.11580000   0.02171693
  0.11580000   0.01996855
  0.11580000   0.01836093
  0.11600000   0.12860423
  0.11600000   0.11832287
  0.11600000   0.10886417
  0.11600000   0.10016214
  0.11600000   0.09215614
  0.11600000   0.08479041
  0.11600000   0.07801366
  0.11600000   0.07177875
  0.11600000   0.06604230
  0.11600000   0.06076444
  0.11600000   0.05590847
  0.11600000   0.05144065
  0.11600000   0.04732993
  0.11600000   0.04354776
  0.11600000   0.04006787
  0.11600000   0.03686609
  0.11600000   0.03392019
  0.11600000   0.03120971
  0.11600000   0.02871584
  0.11600000   0.02642126
  0.11600000   0.02431005
  0.11600000   0.02236754
  0.11600000   0.02058025
  0.11600000   0.01893579
  0.11620000   0.13064814
  0.11620000   0.12028201
  0.11620000   0.11073910
  0.11620000   0.10195388
  0.11620000   0.09386606
  0.11620000   0.08642019
  0.11620000   0.07956525
  0.11620000   0.07325427
  0.11620000   0.06744404
  0.11620000   0.06209480
  0.11620000   0.05716993
  0.11620000   0.05263576
  0.11620000   0.04846127
  0.11620000   0.04461790
  0.11620000   0.04107940
  0.11620000   0.03782155
  0.11620000   0.03482210
  0.11620000   0.03206055
  0.11620000   0.02951802
  0.11620000   0.02717714
  0.11620000   0.02502191
  0.11620000   0.02303761
  0.11620000   0.02121067
  0.11620000   0.01952863
  0.11640000   0.13272436
  0.11640000   0.12227342
  0.11640000   0.11264617
  0.11640000   0.10377752
  0.11640000   0.09560757
  0.11640000   0.08808118
  0.11640000   0.08114758
  0.11640000   0.07476001
  0.11640000   0.06887543
  0.11640000   0.06345419
  0.11640000   0.05845978
  0.11640000   0.05385857
  0.11640000   0.04961958
  0.11640000   0.04571428
  0.11640000   0.04211640
  0.11640000   0.03880172
  0.11640000   0.03574795
  0.11640000   0.03293454
  0.11640000   0.03034257
  0.11640000   0.02795461
  0.11640000   0.02575459
  0.11640000   0.02372772
  0.11640000   0.02186038
  0.11640000   0.02014000
  0.11660000   0.13483340
  0.11660000   0.12429764
  0.11660000   0.11458592
  0.11660000   0.10563364
  0.11660000   0.09738126
  0.11660000   0.08977397
  0.11660000   0.08276126
  0.11660000   0.07629660
  0.11660000   0.07033710
  0.11660000   0.06484326
  0.11660000   0.05977864
  0.11660000   0.05510970
  0.11660000   0.05080550
  0.11660000   0.04683754
  0.11660000   0.04317952
  0.11660000   0.03980724
  0.11660000   0.03669836
  0.11660000   0.03383231
  0.11660000   0.03119011
  0.11660000   0.02875428
  0.11660000   0.02650869
  0.11660000   0.02443848
  0.11660000   0.02252995
  0.11660000   0.02077048
  0.11680000   0.13697576
  0.11680000   0.12635519
  0.11680000   0.11655892
  0.11680000   0.10752280
  0.11680000   0.09918771
  0.11680000   0.09149916
  0.11680000   0.08440691
  0.11680000   0.07786466
  0.11680000   0.07182969
  0.11680000   0.06626263
  0.11680000   0.06112717
  0.11680000   0.05638982
  0.11680000   0.05201970
  0.11680000   0.04798832
  0.11680000   0.04426942
  0.11680000   0.04083876
  0.11680000   0.03767399
  0.11680000   0.03475450
  0.11680000   0.03206128
  0.11680000   0.02957678
  0.11680000   0.02728482
  0.11680000   0.02517049
  0.11680000   0.02322001
  0.11680000   0.02142068
  0.11700000   0.13915197
  0.11700000   0.12844661
  0.11700000   0.11856571
  0.11700000   0.10944558
  0.11700000   0.10102752
  0.11700000   0.09325736
  0.11700000   0.08608516
  0.11700000   0.07946482
  0.11700000   0.07335384
  0.11700000   0.06771297
  0.11700000   0.06250602
  0.11700000   0.05769958
  0.11700000   0.05326283
  0.11700000   0.04916730
  0.11700000   0.04538675
  0.11700000   0.04189694
  0.11700000   0.03867550
  0.11700000   0.03570178
  0.11700000   0.03295673
  0.11700000   0.03042277
  0.11700000   0.02808365
  0.11700000   0.02592439
  0.11700000   0.02393116
  0.11700000   0.02209119
  0.11720000   0.14136255
  0.11720000   0.13057247
  0.11720000   0.12060687
  0.11720000   0.11140258
  0.11720000   0.10290129
  0.11720000   0.09504920
  0.11720000   0.08779663
  0.11720000   0.08109774
  0.11720000   0.07491021
  0.11720000   0.06919495
  0.11720000   0.06391588
  0.11720000   0.05903968
  0.11720000   0.05453558
  0.11720000   0.05037517
  0.11720000   0.04653222
  0.11720000   0.04298247
  0.11720000   0.03970356
  0.11720000   0.03667482
  0.11720000   0.03387714
  0.11720000   0.03129290
  0.11720000   0.02890582
  0.11720000   0.02670083
  0.11720000   0.02466406
  0.11720000   0.02278266
  0.11740000   0.14360804
  0.11740000   0.13273330
  0.11740000   0.12268298
  0.11740000   0.11339440
  0.11740000   0.10480966
  0.11740000   0.09687531
  0.11740000   0.08954199
  0.11740000   0.08276409
  0.11740000   0.07649948
  0.11740000   0.07070924
  0.11740000   0.06535742
  0.11740000   0.06041080
  0.11740000   0.05583866
  0.11740000   0.05161263
  0.11740000   0.04770651
  0.11740000   0.04409606
  0.11740000   0.04075890
  0.11740000   0.03767432
  0.11740000   0.03482320
  0.11740000   0.03218788
  0.11740000   0.02975201
  0.11740000   0.02750049
  0.11740000   0.02541937
  0.11740000   0.02349574
  0.11760000   0.14588897
  0.11760000   0.13492969
  0.11760000   0.12479464
  0.11760000   0.11542164
  0.11760000   0.10675324
  0.11760000   0.09873635
  0.11760000   0.09132189
  0.11760000   0.08446453
  0.11760000   0.07812233
  0.11760000   0.07225656
  0.11760000   0.06683137
  0.11760000   0.06181365
  0.11760000   0.05717277
  0.11760000   0.05288040
  0.11760000   0.04891036
  0.11760000   0.04523843
  0.11760000   0.04184221
  0.11760000   0.03870099
  0.11760000   0.03579563
  0.11760000   0.03310840
  0.11760000   0.03062292
  0.11760000   0.02832404
  0.11760000   0.02619776
  0.11760000   0.02423111
  0.11780000   0.14820590
  0.11780000   0.13716220
  0.11780000   0.12694244
  0.11780000   0.11748494
  0.11780000   0.10873269
  0.11780000   0.10063296
  0.11780000   0.09313702
  0.11780000   0.08619976
  0.11780000   0.07977948
  0.11780000   0.07383761
  0.11780000   0.06833845
  0.11780000   0.06324898
  0.11780000   0.05853866
  0.11780000   0.05417922
  0.11780000   0.05014450
  0.11780000   0.04641031
  0.11780000   0.04295424
  0.11780000   0.03975558
  0.11780000   0.03679514
  0.11780000   0.03405518
  0.11780000   0.03151927
  0.11780000   0.02917222
  0.11780000   0.02699995
  0.11780000   0.02498944
  0.11800000   0.15055939
  0.11800000   0.13943143
  0.11800000   0.12912699
  0.11800000   0.11958492
  0.11800000   0.11074865
  0.11800000   0.10256584
  0.11800000   0.09498806
  0.11800000   0.08797048
  0.11800000   0.08147163
  0.11800000   0.07545312
  0.11800000   0.06987938
  0.11800000   0.06471752
  0.11800000   0.05993708
  0.11800000   0.05550984
  0.11800000   0.05140969
  0.11800000   0.04761246
  0.11800000   0.04409575
  0.11800000   0.04083883
  0.11800000   0.03782250
  0.11800000   0.03502898
  0.11800000   0.03244181
  0.11800000   0.03004574
  0.11800000   0.02782665
  0.11800000   0.02577147
  0.11820000   0.15295001
  0.11820000   0.14173796
  0.11820000   0.13134891
  0.11820000   0.12172222
  0.11820000   0.11280178
  0.11820000   0.10453565
  0.11820000   0.09687571
  0.11820000   0.08977742
  0.11820000   0.08319953
  0.11820000   0.07710383
  0.11820000   0.07145493
  0.11820000   0.06622004
  0.11820000   0.06136878
  0.11820000   0.05687303
  0.11820000   0.05270671
  0.11820000   0.04884567
  0.11820000   0.04526752
  0.11820000   0.04195152
  0.11820000   0.03887847
  0.11820000   0.03603056
  0.11820000   0.03339129
  0.11820000   0.03094536
  0.11820000   0.02867861
  0.11820000   0.02657792
  0.11840000   0.15537832
  0.11840000   0.14408240
  0.11840000   0.13360882
  0.11840000   0.12389750
  0.11840000   0.11489278
  0.11840000   0.10654310
  0.11840000   0.09880069
  0.11840000   0.09162130
  0.11840000   0.08496391
  0.11840000   0.07879051
  0.11840000   0.07306586
  0.11840000   0.06775730
  0.11840000   0.06283457
  0.11840000   0.05826959
  0.11840000   0.05403635
  0.11840000   0.05011071
  0.11840000   0.04647033
  0.11840000   0.04309445
  0.11840000   0.03996385
  0.11840000   0.03706071
  0.11840000   0.03436849
  0.11840000   0.03187186
  0.11840000   0.02955661
  0.11840000   0.02740956
  0.11860000   0.15784491
  0.11860000   0.14646536
  0.11860000   0.13590738
  0.11860000   0.12611143
  0.11860000   0.11702232
  0.11860000   0.10858889
  0.11860000   0.10076373
  0.11860000   0.09350287
  0.11860000   0.08676554
  0.11860000   0.08051393
  0.11860000   0.07471296
  0.11860000   0.06933013
  0.11860000   0.06433524
  0.11860000   0.05970033
  0.11860000   0.05539942
  0.11860000   0.05140843
  0.11860000   0.04770501
  0.11860000   0.04426843
  0.11860000   0.04107945
  0.11860000   0.03812024
  0.11860000   0.03537422
  0.11860000   0.03282603
  0.11860000   0.03046142
  0.11860000   0.02826716
  0.11880000   0.16035038
  0.11880000   0.14888747
  0.11880000   0.13824523
  0.11880000   0.12836468
  0.11880000   0.11919110
  0.11880000   0.11067375
  0.11880000   0.10276558
  0.11880000   0.09542290
  0.11880000   0.08860520
  0.11880000   0.08227488
  0.11880000   0.07639704
  0.11880000   0.07093931
  0.11880000   0.06587162
  0.11880000   0.06116607
  0.11880000   0.05679676
  0.11880000   0.05273964
  0.11880000   0.04897239
  0.11880000   0.04547430
  0.11880000   0.04222611
  0.11880000   0.03920998
  0.11880000   0.03640931
  0.11880000   0.03380871
  0.11880000   0.03139388
  0.11880000   0.02915155
  0.11900000   0.16289533
  0.11900000   0.15134934
  0.11900000   0.14062302
  0.11900000   0.13065793
  0.11900000   0.12139983
  0.11900000   0.11279842
  0.11900000   0.10480698
  0.11900000   0.09738215
  0.11900000   0.09048367
  0.11900000   0.08407417
  0.11900000   0.07811892
  0.11900000   0.07258570
  0.11900000   0.06744455
  0.11900000   0.06266767
  0.11900000   0.05822922
  0.11900000   0.05410521
  0.11900000   0.05027334
  0.11900000   0.04671292
  0.11900000   0.04340469
  0.11900000   0.04033079
  0.11900000   0.03747461
  0.11900000   0.03482073
  0.11900000   0.03235481
  0.11900000   0.03006354
  0.11920000   0.16548036
  0.11920000   0.15385164
  0.11920000   0.14304144
  0.11920000   0.13299189
  0.11920000   0.12364925
  0.11920000   0.11496364
  0.11920000   0.10688871
  0.11920000   0.09938142
  0.11920000   0.09240178
  0.11920000   0.08591263
  0.11920000   0.07987944
  0.11920000   0.07427014
  0.11920000   0.06905489
  0.11920000   0.06420599
  0.11920000   0.05969768
  0.11920000   0.05550602
  0.11920000   0.05160874
  0.11920000   0.04798517
  0.11920000   0.04461606
  0.11920000   0.04148355
  0.11920000   0.03857100
  0.11920000   0.03586297
  0.11920000   0.03334508
  0.11920000   0.03100400
  0.11940000   0.16810609
  0.11940000   0.15639500
  0.11940000   0.14550116
  0.11940000   0.13536727
  0.11940000   0.12594009
  0.11940000   0.11717018
  0.11940000   0.10901156
  0.11940000   0.10142152
  0.11940000   0.09436034
  0.11940000   0.08779110
  0.11940000   0.08167946
  0.11940000   0.07599349
  0.11940000   0.07070352
  0.11940000   0.06578193
  0.11940000   0.06120304
  0.11940000   0.05694297
  0.11940000   0.05297949
  0.11940000   0.04929196
  0.11940000   0.04586114
  0.11940000   0.04266916
  0.11940000   0.03969937
  0.11940000   0.03693632
  0.11940000   0.03436559
  0.11940000   0.03197380
  0.11960000   0.17077315
  0.11960000   0.15898009
  0.11960000   0.14800287
  0.11960000   0.13778478
  0.11960000   0.12827310
  0.11960000   0.11941881
  0.11960000   0.11117633
  0.11960000   0.10350328
  0.11960000   0.09636020
  0.11960000   0.08971044
  0.11960000   0.08351984
  0.11960000   0.07775666
  0.11960000   0.07239134
  0.11960000   0.06739639
  0.11960000   0.06274621
  0.11960000   0.05841698
  0.11960000   0.05438653
  0.11960000   0.05063423
  0.11960000   0.04714086
  0.11960000   0.04388856
  0.11960000   0.04086067
  0.11960000   0.03804171
  0.11960000   0.03541725
  0.11960000   0.03297387
  0.11980000   0.17348219
  0.11980000   0.16160758
  0.11980000   0.15054728
  0.11980000   0.14024517
  0.11980000   0.13064904
  0.11980000   0.12171032
  0.11980000   0.11338383
  0.11980000   0.10562751
  0.11980000   0.09840222
  0.11980000   0.09167152
  0.11980000   0.08540149
  0.11980000   0.07956055
  0.11980000   0.07411929
  0.11980000   0.06905032
  0.11980000   0.06432814
  0.11980000   0.05992901
  0.11980000   0.05583080
  0.11980000   0.05201292
  0.11980000   0.04845617
  0.11980000   0.04514269
  0.11980000   0.04205583
  0.11980000   0.03918008
  0.11980000   0.03650100
  0.11980000   0.03400514
  0.12000000   0.17623384
  0.12000000   0.16427815
  0.12000000   0.15313511
  0.12000000   0.14274918
  0.12000000   0.13306869
  0.12000000   0.12404553
  0.12000000   0.11563490
  0.12000000   0.10779510
  0.12000000   0.10048728
  0.12000000   0.09367526
  0.12000000   0.08732533
  0.12000000   0.08140609
  0.12000000   0.07588829
  0.12000000   0.07074465
  0.12000000   0.06594979
  0.12000000   0.06148002
  0.12000000   0.05731328
  0.12000000   0.05342902
  0.12000000   0.04980806
  0.12000000   0.04643255
  0.12000000   0.04328585
  0.12000000   0.04035243
  0.12000000   0.03761783
  0.12000000   0.03506857
  0.12020000   0.17902875
  0.12020000   0.16699249
  0.12020000   0.15576707
  0.12020000   0.14529757
  0.12020000   0.13553284
  0.12020000   0.12642524
  0.12020000   0.11793037
  0.12020000   0.11000690
  0.12020000   0.10261626
  0.12020000   0.09572255
  0.12020000   0.08929228
  0.12020000   0.08329423
  0.12020000   0.07769931
  0.12020000   0.07248038
  0.12020000   0.06761215
  0.12020000   0.06307101
  0.12020000   0.05883498
  0.12020000   0.05488353
  0.12020000   0.05119753
  0.12020000   0.04775915
  0.12020000   0.04455172
  0.12020000   0.04155974
  0.12020000   0.03876873
  0.12020000   0.03616518
  0.12040000   0.18186761
  0.12040000   0.16975130
  0.12040000   0.15844391
  0.12040000   0.14789111
  0.12040000   0.13804230
  0.12040000   0.12885029
  0.12040000   0.12027112
  0.12040000   0.11226380
  0.12040000   0.10479009
  0.12040000   0.09781434
  0.12040000   0.09130330
  0.12040000   0.08522595
  0.12040000   0.07955335
  0.12040000   0.07425850
  0.12040000   0.06931622
  0.12040000   0.06470300
  0.12040000   0.06039692
  0.12040000   0.05637749
  0.12040000   0.05262563
  0.12040000   0.04912351
  0.12040000   0.04585450
  0.12040000   0.04280307
  0.12040000   0.03995473
  0.12040000   0.03729597
  0.12060000   0.18475107
  0.12060000   0.17255530
  0.12060000   0.16116638
  0.12060000   0.15053059
  0.12060000   0.14059787
  0.12060000   0.13132153
  0.12060000   0.12265802
  0.12060000   0.11456671
  0.12060000   0.10700969
  0.12060000   0.09995158
  0.12060000   0.09335936
  0.12060000   0.08720223
  0.12060000   0.08145141
  0.12060000   0.07608004
  0.12060000   0.07106306
  0.12060000   0.06637705
  0.12060000   0.06200015
  0.12060000   0.05791196
  0.12060000   0.05409341
  0.12060000   0.05052672
  0.12060000   0.04719524
  0.12060000   0.04408347
  0.12060000   0.04117691
  0.12060000   0.03846202
  0.12080000   0.18767982
  0.12080000   0.17540521
  0.12080000   0.16393523
  0.12080000   0.15321680
  0.12080000   0.14320040
  0.12080000   0.13383983
  0.12080000   0.12509197
  0.12080000   0.11691656
  0.12080000   0.10927601
  0.12080000   0.10213524
  0.12080000   0.09546147
  0.12080000   0.08922410
  0.12080000   0.08339452
  0.12080000   0.07794604
  0.12080000   0.07285371
  0.12080000   0.06809421
  0.12080000   0.06364577
  0.12080000   0.05948803
  0.12080000   0.05560198
  0.12080000   0.05196986
  0.12080000   0.04857505
  0.12080000   0.04540205
  0.12080000   0.04243635
  0.12100000   0.19065456
  0.12100000   0.17830176
  0.12100000   0.16675124
  0.12100000   0.15595055
  0.12100000   0.14585073
  0.12100000   0.13640607
  0.12100000   0.12757387
  0.12100000   0.11931427
  0.12100000   0.11159002
  0.12100000   0.10436632
  0.12100000   0.09761063
  0.12100000   0.09129258
  0.12100000   0.08538375
  0.12100000   0.07985758
  0.12100000   0.07468927
  0.12100000   0.06985559
  0.12100000   0.06533487
  0.12100000   0.06110681
  0.12100000   0.05715245
  0.12100000   0.05345406
  0.12100000   0.04999505
  0.12100000   0.04675993
  0.12100000   0.04373419
  0.12120000   0.19367600
  0.12120000   0.18124570
  0.12120000   0.16961520
  0.12120000   0.15873267
  0.12120000   0.14854972
  0.12120000   0.13902113
  0.12120000   0.13010466
  0.12120000   0.12176083
  0.12120000   0.11395272
  0.12120000   0.10664583
  0.12120000   0.09980790
  0.12120000   0.09340875
  0.12120000   0.08742017
  0.12120000   0.08181576
  0.12120000   0.07657085
  0.12120000   0.07166233
  0.12120000   0.06706860
  0.12120000   0.06276945
  0.12120000   0.05874598
  0.12120000   0.05498048
  0.12120000   0.05145641
  0.12120000   0.04815827
  0.12120000   0.04507158
  0.12140000   0.19674483
  0.12140000   0.18423779
  0.12140000   0.17252790
  0.12140000   0.16156399
  0.12140000   0.15129824
  0.12140000   0.14168594
  0.12140000   0.13268528
  0.12140000   0.12425719
  0.12140000   0.11636510
  0.12140000   0.10897481
  0.12140000   0.10205431
  0.12140000   0.09557368
  0.12140000   0.08950488
  0.12140000   0.08382170
  0.12140000   0.07849958
  0.12140000   0.07351556
  0.12140000   0.06884812
  0.12140000   0.06447713
  0.12140000   0.06038374
  0.12140000   0.05655031
  0.12140000   0.05296031
  0.12140000   0.04959828
  0.12140000   0.04644972
  0.12160000   0.19986180
  0.12160000   0.18727879
  0.12160000   0.17549016
  0.12160000   0.16444537
  0.12160000   0.15409719
  0.12160000   0.14440141
  0.12160000   0.13531670
  0.12160000   0.12680436
  0.12160000   0.11882819
  0.12160000   0.11135431
  0.12160000   0.10435097
  0.12160000   0.09778848
  0.12160000   0.09163902
  0.12160000   0.08587654
  0.12160000   0.08047664
  0.12160000   0.07541647
  0.12160000   0.07067463
  0.12160000   0.06623106
  0.12160000   0.06206697
  0.12160000   0.05816478
  0.12160000   0.05450800
  0.12160000   0.05108118
  0.12160000   0.04786984
  0.12180000   0.20302763
  0.12180000   0.19036948
  0.12180000   0.17850279
  0.12180000   0.16737767
  0.12180000   0.15694747
  0.12180000   0.14716850
  0.12180000   0.13799988
  0.12180000   0.12940335
  0.12180000   0.12134305
  0.12180000   0.11378541
  0.12180000   0.10669898
  0.12180000   0.10005429
  0.12180000   0.09382375
  0.12180000   0.08798148
  0.12180000   0.08250323
  0.12180000   0.07736629
  0.12180000   0.07254935
  0.12180000   0.06803246
  0.12180000   0.06379691
  0.12180000   0.05982514
  0.12180000   0.05610072
  0.12180000   0.05260823
  0.12180000   0.04933322
  0.12200000   0.20624306
  0.12200000   0.19351065
  0.12200000   0.18156663
  0.12200000   0.17036177
  0.12200000   0.15985000
  0.12200000   0.14998816
  0.12200000   0.14073585
  0.12200000   0.13205520
  0.12200000   0.12391073
  0.12200000   0.11626921
  0.12200000   0.10909946
  0.12200000   0.10237227
  0.12200000   0.09606024
  0.12200000   0.09013770
  0.12200000   0.08458057
  0.12200000   0.07936624
  0.12200000   0.07447355
  0.12200000   0.06988263
  0.12200000   0.06557483
  0.12200000   0.06153268
  0.12200000   0.05773979
  0.12200000   0.05418075
  0.12200000   0.05084116
  0.12220000   0.20950886
  0.12220000   0.19670311
  0.12220000   0.18468253
  0.12220000   0.17339856
  0.12220000   0.16280571
  0.12220000   0.15286137
  0.12220000   0.14352560
  0.12220000   0.13476096
  0.12220000   0.12653234
  0.12220000   0.11880684
  0.12220000   0.11155357
  0.12220000   0.10474358
  0.12220000   0.09834971
  0.12220000   0.09234645
  0.12220000   0.08670990
  0.12220000   0.08141761
  0.12220000   0.07644852
  0.12220000   0.07178285
  0.12220000   0.06740207
  0.12220000   0.06328874
  0.12220000   0.05942652
  0.12220000   0.05580008
  0.12220000   0.05239500
  0.12240000   0.21282579
  0.12240000   0.19994767
  0.12240000   0.18785135
  0.12240000   0.17648895
  0.12240000   0.16581556
  0.12240000   0.15578913
  0.12240000   0.14637018
  0.12240000   0.13752170
  0.12240000   0.12920898
  0.12240000   0.12139944
  0.12240000   0.11406249
  0.12240000   0.10716945
  0.12240000   0.10069338
  0.12240000   0.09460899
  0.12240000   0.08889252
  0.12240000   0.08352170
  0.12240000   0.07847557
  0.12240000   0.07373448
  0.12240000   0.06927996
  0.12240000   0.06509466
  0.12240000   0.06116231
  0.12240000   0.05746758
  0.12240000   0.05399612
  0.12260000   0.21619462
  0.12260000   0.20324515
  0.12260000   0.19107397
  0.12260000   0.17963385
  0.12260000   0.16888052
  0.12260000   0.15877244
  0.12260000   0.14927063
  0.12260000   0.14033852
  0.12260000   0.13194178
  0.12260000   0.12404817
  0.12260000   0.11662742
  0.12260000   0.10965111
  0.12260000   0.10309253
  0.12260000   0.09692660
  0.12260000   0.09112974
  0.12260000   0.08567984
  0.12260000   0.08055606
  0.12260000   0.07573887
  0.12260000   0.07120990
  0.12260000   0.06695187
  0.12260000   0.06294855
  0.12260000   0.05918469
  0.12260000   0.05564596
  0.12280000   0.21961614
  0.12280000   0.20659639
  0.12280000   0.19435127
  0.12280000   0.18283422
  0.12280000   0.17200157
  0.12280000   0.16181234
  0.12280000   0.15222804
  0.12280000   0.14321254
  0.12280000   0.13473190
  0.12280000   0.12675424
  0.12280000   0.11924960
  0.12280000   0.11218982
  0.12280000   0.10554844
  0.12280000   0.09930060
  0.12280000   0.09342291
  0.12280000   0.08789340
  0.12280000   0.08269139
  0.12280000   0.07779745
  0.12280000   0.07319331
  0.12280000   0.06886178
  0.12280000   0.06478670
  0.12280000   0.06095287
  0.12280000   0.05734598
  0.12300000   0.22309115
  0.12300000   0.21000225
  0.12300000   0.19768415
  0.12300000   0.18609099
  0.12300000   0.17517971
  0.12300000   0.16490987
  0.12300000   0.15524350
  0.12300000   0.14614489
  0.12300000   0.13758052
  0.12300000   0.12951886
  0.12300000   0.12193026
  0.12300000   0.11478686
  0.12300000   0.10806244
  0.12300000   0.10173235
  0.12300000   0.09577341
  0.12300000   0.09016379
  0.12300000   0.08488298
  0.12300000   0.07991166
  0.12300000   0.07523166
  0.12300000   0.07082589
  0.12300000   0.06667825
  0.12300000   0.06277360
  0.12300000   0.05909769
  0.12320000   0.22662045
  0.12320000   0.21346358
  0.12320000   0.20107353
  0.12320000   0.18940514
  0.12320000   0.17841596
  0.12320000   0.16806611
  0.12320000   0.15831811
  0.12320000   0.14913673
  0.12320000   0.14048884
  0.12320000   0.13234327
  0.12320000   0.12467070
  0.12320000   0.11744355
  0.12320000   0.11063587
  0.12320000   0.10422323
  0.12320000   0.09818263
  0.12320000   0.09249245
  0.12320000   0.08713229
  0.12320000   0.08208297
  0.12320000   0.07732645
  0.12320000   0.07284571
  0.12320000   0.06862474
  0.12320000   0.06464845
  0.12320000   0.06090265
  0.12340000   0.23020487
  0.12340000   0.21698125
  0.12340000   0.20452034
  0.12340000   0.19277765
  0.12340000   0.18171134
  0.12340000   0.17128212
  0.12340000   0.16145301
  0.12340000   0.15218924
  0.12340000   0.14345807
  0.12340000   0.13522873
  0.12340000   0.12747221
  0.12340000   0.12016124
  0.12340000   0.11327012
  0.12340000   0.10677465
  0.12340000   0.10065204
  0.12340000   0.09488084
  0.12340000   0.08944081
  0.12340000   0.08431292
  0.12340000   0.07947922
  0.12340000   0.07492280
  0.12340000   0.07062773
  0.12340000   0.06657900
  0.12340000   0.06276246
  0.12360000   0.23384524
  0.12360000   0.22055617
  0.12360000   0.20802552
  0.12360000   0.19620950
  0.12360000   0.18506692
  0.12360000   0.17455902
  0.12360000   0.16464936
  0.12360000   0.15530361
  0.12360000   0.14648948
  0.12360000   0.13817654
  0.12360000   0.13033614
  0.12360000   0.12294130
  0.12360000   0.11596659
  0.12360000   0.10938806
  0.12360000   0.10318311
  0.12360000   0.09733047
  0.12360000   0.09181009
  0.12360000   0.08660306
  0.12360000   0.08169156
  0.12360000   0.07705877
  0.12360000   0.07268886
  0.12360000   0.06856688
  0.12360000   0.06467876
  0.12380000   0.23754240
  0.12380000   0.22418922
  0.12380000   0.21159003
  0.12380000   0.19970173
  0.12380000   0.18848375
  0.12380000   0.17789793
  0.12380000   0.16790832
  0.12380000   0.15848108
  0.12380000   0.14958432
  0.12380000   0.14118801
  0.12380000   0.13326385
  0.12380000   0.12578514
  0.12380000   0.11872674
  0.12380000   0.11206493
  0.12380000   0.10577734
  0.12380000   0.09984290
  0.12380000   0.09424170
  0.12380000   0.08895500
  0.12380000   0.08396508
  0.12380000   0.07925526
  0.12380000   0.07480978
  0.12380000   0.07061379
  0.12380000   0.06665325
  0.12400000   0.24129721
  0.12400000   0.22788132
  0.12400000   0.21521484
  0.12400000   0.20325535
  0.12400000   0.19196293
  0.12400000   0.18129998
  0.12400000   0.17123109
  0.12400000   0.16172288
  0.12400000   0.15274390
  0.12400000   0.14426450
  0.12400000   0.13625672
  0.12400000   0.12869418
  0.12400000   0.12155203
  0.12400000   0.11480678
  0.12400000   0.10843630
  0.12400000   0.10241970
  0.12400000   0.09673726
  0.12400000   0.09137036
  0.12400000   0.08630146
  0.12400000   0.08151396
  0.12400000   0.07699221
  0.12400000   0.07272143
  0.12400000   0.06868768
  0.12420000   0.24511052
  0.12420000   0.23163339
  0.12420000   0.21890093
  0.12420000   0.20687142
  0.12420000   0.19550556
  0.12420000   0.18476635
  0.12420000   0.17461889
  0.12420000   0.16503029
  0.12420000   0.15596953
  0.12420000   0.14740736
  0.12420000   0.13931617
  0.12420000   0.13166989
  0.12420000   0.12444396
  0.12420000   0.11761515
  0.12420000   0.11116156
  0.12420000   0.10506249
  0.12420000   0.09929840
  0.12420000   0.09385085
  0.12420000   0.08870241
  0.12420000   0.08383661
  0.12420000   0.07923790
  0.12420000   0.07489161
  0.12420000   0.07078385
  0.12440000   0.24898321
  0.12440000   0.23544638
  0.12440000   0.22264931
  0.12440000   0.21055098
  0.12440000   0.19911275
  0.12440000   0.18829819
  0.12440000   0.17807294
  0.12440000   0.16840460
  0.12440000   0.15926257
  0.12440000   0.15061800
  0.12440000   0.14244364
  0.12440000   0.13471377
  0.12440000   0.12740408
  0.12440000   0.12049163
  0.12440000   0.11395474
  0.12440000   0.10777293
  0.12440000   0.10192684
  0.12440000   0.09639818
  0.12440000   0.09116968
  0.12440000   0.08622499
  0.12440000   0.08154867
  0.12440000   0.07712614
  0.12440000   0.07294359
  0.12460000   0.25291618
  0.12460000   0.23932123
  0.12460000   0.22646099
  0.12460000   0.21429513
  0.12460000   0.20278565
  0.12460000   0.19189673
  0.12460000   0.18159452
  0.12460000   0.17184712
  0.12460000   0.16262438
  0.12460000   0.15389784
  0.12460000   0.14564063
  0.12460000   0.13782734
  0.12460000   0.13043397
  0.12460000   0.12343784
  0.12460000   0.11681751
  0.12460000   0.11055272
  0.12460000   0.10462430
  0.12460000   0.09901413
  0.12460000   0.09370507
  0.12460000   0.08868093
  0.12460000   0.08392637
  0.12460000   0.07942691
  0.12460000   0.07516882
  0.12480000   0.25691032
  0.12480000   0.24325892
  0.12480000   0.23033699
  0.12480000   0.21810494
  0.12480000   0.20652542
  0.12480000   0.19556316
  0.12480000   0.18518490
  0.12480000   0.17535919
  0.12480000   0.16605636
  0.12480000   0.15724834
  0.12480000   0.14890862
  0.12480000   0.14101215
  0.12480000   0.13353522
  0.12480000   0.12645543
  0.12480000   0.11975157
  0.12480000   0.11340360
  0.12480000   0.10739256
  0.12480000   0.10170050
  0.12480000   0.09631044
  0.12480000   0.09120632
  0.12480000   0.08637292
  0.12480000   0.08179585
  0.12480000   0.07746149
  0.12500000   0.26096655
  0.12500000   0.24726041
  0.12500000   0.23427837
  0.12500000   0.22198154
  0.12500000   0.21033322
  0.12500000   0.19929875
  0.12500000   0.18884538
  0.12500000   0.17894218
  0.12500000   0.16955993
  0.12500000   0.16067097
  0.12500000   0.15224917
  0.12500000   0.14426980
  0.12500000   0.13670948
  0.12500000   0.12954608
  0.12500000   0.12275865
  0.12500000   0.11632736
  0.12500000   0.11023346
  0.12500000   0.10445917
  0.12500000   0.09898769
  0.12500000   0.09380308
  0.12500000   0.08889026
  0.12500000   0.08423495
  0.12500000   0.07982362
  0.12520000   0.26508578
  0.12520000   0.25132669
  0.12520000   0.23828618
  0.12520000   0.22592606
  0.12520000   0.21421026
  0.12520000   0.20310473
  0.12520000   0.19257728
  0.12520000   0.18259748
  0.12520000   0.17313654
  0.12520000   0.16416724
  0.12520000   0.15566383
  0.12520000   0.14760192
  0.12520000   0.13995843
  0.12520000   0.13271153
  0.12520000   0.12584052
  0.12520000   0.11932581
  0.12520000   0.11314885
  0.12520000   0.10729204
  0.12520000   0.10173875
  0.12520000   0.09647319
  0.12520000   0.09148042
  0.12520000   0.08674625
  0.12520000   0.08225727
  0.12540000   0.26926896
  0.12540000   0.25545879
  0.12540000   0.24236150
  0.12540000   0.22993962
  0.12540000   0.21815774
  0.12540000   0.20698241
  0.12540000   0.19638197
  0.12540000   0.18632650
  0.12540000   0.17678768
  0.12540000   0.16773871
  0.12540000   0.15915421
  0.12540000   0.15101015
  0.12540000   0.14328379
  0.12540000   0.13595355
  0.12540000   0.12899902
  0.12540000   0.12240083
  0.12540000   0.11614064
  0.12540000   0.11020107
  0.12540000   0.10456563
  0.12540000   0.09921870
  0.12540000   0.09414546
  0.12540000   0.08933186
  0.12540000   0.08476458
  0.12560000   0.27351702
  0.12560000   0.25965770
  0.12560000   0.24650542
  0.12560000   0.23402340
  0.12560000   0.22217691
  0.12560000   0.21093307
  0.12560000   0.20026080
  0.12560000   0.19013067
  0.12560000   0.18051484
  0.12560000   0.17138692
  0.12560000   0.16272193
  0.12560000   0.15449620
  0.12560000   0.14668729
  0.12560000   0.13927394
  0.12560000   0.13223599
  0.12560000   0.12555432
  0.12560000   0.11921081
  0.12560000   0.11318826
  0.12560000   0.10747038
  0.12560000   0.10204169
  0.12560000   0.09688752
  0.12560000   0.09199394
  0.12560000   0.08734775
  0.12580000   0.27783094
  0.12580000   0.26392448
  0.12580000   0.25071904
  0.12580000   0.23817858
  0.12580000   0.22626900
  0.12580000   0.21495804
  0.12580000   0.20421517
  0.12580000   0.19401147
  0.12580000   0.18431956
  0.12580000   0.17511349
  0.12580000   0.16636867
  0.12580000   0.15806179
  0.12580000   0.15017074
  0.12580000   0.14267455
  0.12580000   0.13555334
  0.12580000   0.12878824
  0.12580000   0.12236135
  0.12580000   0.11625567
  0.12580000   0.11045509
  0.12580000   0.10494430
  0.12580000   0.09970877
  0.12580000   0.09473471
  0.12580000   0.09000902
  0.12600000   0.28221168
  0.12600000   0.26826015
  0.12600000   0.25500349
  0.12600000   0.24240635
  0.12600000   0.23043529
  0.12600000   0.21905867
  0.12600000   0.20824649
  0.12600000   0.19797038
  0.12600000   0.18820340
  0.12600000   0.17892005
  0.12600000   0.17009612
  0.12600000   0.16170868
  0.12600000   0.15373595
  0.12600000   0.14615727
  0.12600000   0.13895302
  0.12600000   0.13210459
  0.12600000   0.12559432
  0.12600000   0.11940541
  0.12600000   0.11352193
  0.12600000   0.10792874
  0.12600000   0.10261147
  0.12600000   0.09755645
  0.12600000   0.09275072
  0.12620000   0.28666022
  0.12620000   0.27266579
  0.12620000   0.25935990
  0.12620000   0.24670792
  0.12620000   0.23467708
  0.12620000   0.22323632
  0.12620000   0.21235622
  0.12620000   0.20200891
  0.12620000   0.19216795
  0.12620000   0.18280824
  0.12620000   0.17390602
  0.12620000   0.16543868
  0.12620000   0.15738480
  0.12620000   0.14972402
  0.12620000   0.14243702
  0.12620000   0.13550543
  0.12620000   0.12891182
  0.12620000   0.12263963
  0.12620000   0.11667309
  0.12620000   0.11099726
  0.12620000   0.10559790
  0.12620000   0.10046151
  0.12620000   0.09557523
  0.12640000   0.29117757
  0.12640000   0.27714246
  0.12640000   0.26378942
  0.12640000   0.25108453
  0.12640000   0.23899566
  0.12640000   0.22749238
  0.12640000   0.21654582
  0.12640000   0.20612862
  0.12640000   0.19621482
  0.12640000   0.18677978
  0.12640000   0.17780011
  0.12640000   0.16925361
  0.12640000   0.16111918
  0.12640000   0.15337678
  0.12640000   0.14600737
  0.12640000   0.13899285
  0.12640000   0.13231602
  0.12640000   0.12596054
  0.12640000   0.11991085
  0.12640000   0.11415218
  0.12640000   0.10867045
  0.12640000   0.10345230
  0.12640000   0.09848501
  0.12660000   0.29576473
  0.12660000   0.28169125
  0.12660000   0.26829323
  0.12660000   0.25553743
  0.12660000   0.24339238
  0.12660000   0.23182826
  0.12660000   0.22081677
  0.12660000   0.21033107
  0.12660000   0.20034567
  0.12660000   0.19083637
  0.12660000   0.18178021
  0.12660000   0.17315535
  0.12660000   0.16494104
  0.12660000   0.15711755
  0.12660000   0.14966615
  0.12660000   0.14256899
  0.12660000   0.13580912
  0.12660000   0.12937042
  0.12660000   0.12323754
  0.12660000   0.11739587
  0.12660000   0.11183153
  0.12660000   0.10653130
  0.12660000   0.10148258
  0.12680000   0.30042271
  0.12680000   0.28631328
  0.12680000   0.27287250
  0.12680000   0.26006787
  0.12680000   0.24786858
  0.12680000   0.23624540
  0.12680000   0.22517059
  0.12680000   0.21461785
  0.12680000   0.20456216
  0.12680000   0.19497979
  0.12680000   0.18584815
  0.12680000   0.17714581
  0.12680000   0.16885236
  0.12680000   0.16094840
  0.12680000   0.15341549
  0.12680000   0.14623605
  0.12680000   0.13939338
  0.12680000   0.13287159
  0.12680000   0.12665553
  0.12680000   0.12073079
  0.12680000   0.11508365
  0.12680000   0.10970105
  0.12680000   0.10457053
  0.12700000   0.30515256
  0.12700000   0.29100964
  0.12700000   0.27752844
  0.12700000   0.26467716
  0.12700000   0.25242563
  0.12700000   0.24074524
  0.12700000   0.22960883
  0.12700000   0.21899059
  0.12700000   0.20886602
  0.12700000   0.19921181
  0.12700000   0.19000580
  0.12700000   0.18122694
  0.12700000   0.17285518
  0.12700000   0.16487143
  0.12700000   0.15725756
  0.12700000   0.14999627
  0.12700000   0.14307111
  0.12700000   0.13646642
  0.12700000   0.13016726
  0.12700000   0.12415942
  0.12700000   0.11842936
  0.12700000   0.11296416
  0.12700000   0.10775153
  0.12720000   0.30995532
  0.12720000   0.29578148
  0.12720000   0.28226227
  0.12720000   0.26936658
  0.12720000   0.25706492
  0.12720000   0.24532927
  0.12720000   0.23413304
  0.12720000   0.22345095
  0.12720000   0.21325897
  0.12720000   0.20353425
  0.12720000   0.19425507
  0.12720000   0.18540073
  0.12720000   0.17695155
  0.12720000   0.16888878
  0.12720000   0.16119459
  0.12720000   0.15385195
  0.12720000   0.14684469
  0.12720000   0.14015735
  0.12720000   0.13377525
  0.12720000   0.12768434
  0.12720000   0.12187129
  0.12720000   0.11632333
  0.12720000   0.11102832
  0.12740000   0.31483204
  0.12740000   0.30062994
  0.12740000   0.28707521
  0.12740000   0.27413747
  0.12740000   0.26178787
  0.12740000   0.24999899
  0.12740000   0.23874482
  0.12740000   0.22800060
  0.12740000   0.21774278
  0.12740000   0.20794898
  0.12740000   0.19859789
  0.12740000   0.18966920
  0.12740000   0.18114359
  0.12740000   0.17300265
  0.12740000   0.16522884
  0.12740000   0.15780544
  0.12740000   0.15071652
  0.12740000   0.14394689
  0.12740000   0.13748205
  0.12740000   0.13130819
  0.12740000   0.12541213
  0.12740000   0.11978131
  0.12740000   0.11440372
  0.12760000   0.31978380
  0.12760000   0.30555617
  0.12760000   0.29196852
  0.12760000   0.27899116
  0.12760000   0.26659589
  0.12760000   0.25475592
  0.12760000   0.24344578
  0.12760000   0.23264124
  0.12760000   0.22231926
  0.12760000   0.21245789
  0.12760000   0.20303624
  0.12760000   0.19403441
  0.12760000   0.18543345
  0.12760000   0.17721527
  0.12760000   0.16936264
  0.12760000   0.16185915
  0.12760000   0.15468911
  0.12760000   0.14783757
  0.12760000   0.14129029
  0.12760000   0.13503365
  0.12760000   0.12905466
  0.12760000   0.12334093
  0.12760000   0.11788062
  0.12780000   0.32481168
  0.12780000   0.31056135
  0.12780000   0.29694346
  0.12780000   0.28392901
  0.12780000   0.27149046
  0.12780000   0.25960161
  0.12780000   0.24823756
  0.12780000   0.23737462
  0.12780000   0.22699022
  0.12780000   0.21706289
  0.12780000   0.20757214
  0.12780000   0.19849849
  0.12780000   0.18982333
  0.12780000   0.18152892
  0.12780000   0.17359836
  0.12780000   0.16601551
  0.12780000   0.15876497
  0.12780000   0.15183203
  0.12780000   0.14520268
  0.12780000   0.13886350
  0.12780000   0.13280172
  0.12780000   0.12700511
  0.12780000   0.12146200
  0.12800000   0.32991677
  0.12800000   0.31564666
  0.12800000   0.30200131
  0.12800000   0.28895240
  0.12800000   0.27647303
  0.12800000   0.26453763
  0.12800000   0.25312184
  0.12800000   0.24220250
  0.12800000   0.23175754
  0.12800000   0.22176594
  0.12800000   0.21220765
  0.12800000   0.20306357
  0.12800000   0.19431546
  0.12800000   0.18594595
  0.12800000   0.17793843
  0.12800000   0.17027705
  0.12800000   0.16294671
  0.12800000   0.15593294
  0.12800000   0.14922196
  0.12800000   0.14280058
  0.12800000   0.13665621
  0.12800000   0.13077682
  0.12800000   0.12515091
  0.12820000   0.33510018
  0.12820000   0.32081332
  0.12820000   0.30714337
  0.12820000   0.29406272
  0.12820000   0.28154511
  0.12820000   0.26956556
  0.12820000   0.25810029
  0.12820000   0.24712667
  0.12820000   0.23662310
  0.12820000   0.22656903
  0.12820000   0.21694485
  0.12820000   0.20773184
  0.12820000   0.19891214
  0.12820000   0.19046872
  0.12820000   0.18238530
  0.12820000   0.17464634
  0.12820000   0.16723698
  0.12820000   0.16014304
  0.12820000   0.15335097
  0.12820000   0.14684780
  0.12820000   0.14062114
  0.12820000   0.13465915
  0.12820000   0.12895050
  0.12840000   0.34036303
  0.12840000   0.32606253
  0.12840000   0.31237096
  0.12840000   0.29926139
  0.12840000   0.28670821
  0.12840000   0.27468703
  0.12840000   0.26317465
  0.12840000   0.25214895
  0.12840000   0.24158883
  0.12840000   0.23147420
  0.12840000   0.22178587
  0.12840000   0.21250553
  0.12840000   0.20361570
  0.12840000   0.19509968
  0.12840000   0.18694152
  0.12840000   0.17912598
  0.12840000   0.17163850
  0.12840000   0.16446514
  0.12840000   0.15759260
  0.12840000   0.15100813
  0.12840000   0.14469956
  0.12840000   0.13865522
  0.12840000   0.13286398
  0.12860000   0.34570646
  0.12860000   0.33139552
  0.12860000   0.31768540
  0.12860000   0.30454983
  0.12860000   0.29196386
  0.12860000   0.27990368
  0.12860000   0.26834666
  0.12860000   0.25727120
  0.12860000   0.24665669
  0.12860000   0.23648351
  0.12860000   0.22673289
  0.12860000   0.21738692
  0.12860000   0.20842851
  0.12860000   0.19984129
  0.12860000   0.19160966
  0.12860000   0.18371867
  0.12860000   0.17615404
  0.12860000   0.16890212
  0.12860000   0.16194982
  0.12860000   0.15528464
  0.12860000   0.14889461
  0.12860000   0.14276828
  0.12860000   0.13689468
  0.12880000   0.35113160
  0.12880000   0.33681354
  0.12880000   0.32308803
  0.12880000   0.30992951
  0.12880000   0.29731361
  0.12880000   0.28521717
  0.12880000   0.27361809
  0.12880000   0.26249529
  0.12880000   0.25182867
  0.12880000   0.24159905
  0.12880000   0.23178810
  0.12880000   0.22237833
  0.12880000   0.21335299
  0.12880000   0.20469609
  0.12880000   0.19639235
  0.12880000   0.18842714
  0.12880000   0.18078645
  0.12880000   0.17345690
  0.12880000   0.16642566
  0.12880000   0.15968046
  0.12880000   0.15320954
  0.12880000   0.14700164
  0.12880000   0.14104599
  0.12900000   0.35663962
  0.12900000   0.34231785
  0.12900000   0.32858023
  0.12900000   0.31540188
  0.12900000   0.30275906
  0.12900000   0.29062919
  0.12900000   0.27899073
  0.12900000   0.26782313
  0.12900000   0.25710679
  0.12900000   0.24682296
  0.12900000   0.23695376
  0.12900000   0.22748210
  0.12900000   0.21839161
  0.12900000   0.20966666
  0.12900000   0.20129229
  0.12900000   0.19325418
  0.12900000   0.18553862
  0.12900000   0.17813250
  0.12900000   0.17102323
  0.12900000   0.16419879
  0.12900000   0.15764762
  0.12900000   0.15135869
  0.12900000   0.14532140
  0.12920000   0.36223167
  0.12920000   0.34790971
  0.12920000   0.33416338
  0.12920000   0.32096843
  0.12920000   0.30830179
  0.12920000   0.29614144
  0.12920000   0.28446642
  0.12920000   0.27325667
  0.12920000   0.26249309
  0.12920000   0.25215741
  0.12920000   0.24223216
  0.12920000   0.23270064
  0.12920000   0.22354689
  0.12920000   0.21475563
  0.12920000   0.20631222
  0.12920000   0.19820266
  0.12920000   0.19041353
  0.12920000   0.18293199
  0.12920000   0.17574572
  0.12920000   0.16884292
  0.12920000   0.16221227
  0.12920000   0.15584293
  0.12920000   0.14972450
  0.12940000   0.36790895
  0.12940000   0.35359042
  0.12940000   0.33983885
  0.12940000   0.32663068
  0.12940000   0.31394342
  0.12940000   0.30175567
  0.12940000   0.29004699
  0.12940000   0.27879788
  0.12940000   0.26798968
  0.12940000   0.25760460
  0.12940000   0.24762561
  0.12940000   0.23803640
  0.12940000   0.22882140
  0.12940000   0.21996567
  0.12940000   0.21145493
  0.12940000   0.20327548
  0.12940000   0.19541420
  0.12940000   0.18785852
  0.12940000   0.18059637
  0.12940000   0.17361621
  0.12940000   0.16690694
  0.12940000   0.16045793
  0.12940000   0.15425897
  0.12960000   0.37367263
  0.12960000   0.35936127
  0.12960000   0.34560808
  0.12960000   0.33239014
  0.12960000   0.31968560
  0.12960000   0.30747363
  0.12960000   0.29573434
  0.12960000   0.28444874
  0.12960000   0.27359867
  0.12960000   0.26316678
  0.12960000   0.25313648
  0.12960000   0.24349187
  0.12960000   0.23421774
  0.12960000   0.22529954
  0.12960000   0.21672329
  0.12960000   0.20847563
  0.12960000   0.20054373
  0.12960000   0.19291529
  0.12960000   0.18557853
  0.12960000   0.17852211
  0.12960000   0.17173520
  0.12960000   0.16520736
  0.12960000   0.15892858
  0.12980000   0.37952394
  0.12980000   0.36522358
  0.12980000   0.35147248
  0.12980000   0.33824836
  0.12980000   0.32552999
  0.12980000   0.31329710
  0.12980000   0.30153036
  0.12980000   0.29021129
  0.12980000   0.27932221
  0.12980000   0.26884623
  0.12980000   0.25876718
  0.12980000   0.24906957
  0.12980000   0.23973858
  0.12980000   0.23076000
  0.12980000   0.22212020
  0.12980000   0.21380614
  0.12980000   0.20580528
  0.12980000   0.19810560
  0.12980000   0.19069559
  0.12980000   0.18356416
  0.12980000   0.17670068
  0.12980000   0.17009497
  0.12980000   0.16373721
  0.13000000   0.38546408
  0.13000000   0.37117867
  0.13000000   0.35743349
  0.13000000   0.34420689
  0.13000000   0.33147826
  0.13000000   0.31922789
  0.13000000   0.30743699
  0.13000000   0.29608759
  0.13000000   0.28516249
  0.13000000   0.27464527
  0.13000000   0.26452016
  0.13000000   0.25477210
  0.13000000   0.24538663
  0.13000000   0.23634991
  0.13000000   0.22764865
  0.13000000   0.21927012
  0.13000000   0.21120208
  0.13000000   0.20343281
  0.13000000   0.19595104
  0.13000000   0.18874594
  0.13000000   0.18180713
  0.13000000   0.17512462
  0.13000000   0.16868882
  0.13020000   0.39149428
  0.13020000   0.37722789
  0.13020000   0.36349258
  0.13020000   0.35026733
  0.13020000   0.33753212
  0.13020000   0.32526782
  0.13020000   0.31345618
  0.13020000   0.30207972
  0.13020000   0.29112174
  0.13020000   0.28056623
  0.13020000   0.27039790
  0.13020000   0.26060206
  0.13020000   0.25116464
  0.13020000   0.24207215
  0.13020000   0.23331165
  0.13020000   0.22487072
  0.13020000   0.21673743
  0.13020000   0.20890034
  0.13020000   0.20134844
  0.13020000   0.19407117
  0.13020000   0.18705836
  0.13020000   0.18030027
  0.13020000   0.17378749
  0.13040000   0.39761577
  0.13040000   0.38337259
  0.13040000   0.36965121
  0.13040000   0.35643125
  0.13040000   0.34369329
  0.13040000   0.33141875
  0.13040000   0.31958991
  0.13040000   0.30818980
  0.13040000   0.29720219
  0.13040000   0.28661153
  0.13040000   0.27640293
  0.13040000   0.26656212
  0.13040000   0.25707541
  0.13040000   0.24792967
  0.13040000   0.23911229
  0.13040000   0.23061118
  0.13040000   0.22241470
  0.13040000   0.21451170
  0.13040000   0.20689144
  0.13040000   0.19954361
  0.13040000   0.19245829
  0.13040000   0.18562594
  0.13040000   0.17903739
  0.13060000   0.40382981
  0.13060000   0.38961414
  0.13060000   0.37591088
  0.13060000   0.36270028
  0.13060000   0.34996351
  0.13060000   0.33768255
  0.13060000   0.32584019
  0.13060000   0.31441998
  0.13060000   0.30340614
  0.13060000   0.29278357
  0.13060000   0.28253782
  0.13060000   0.27265501
  0.13060000   0.26312182
  0.13060000   0.25392548
  0.13060000   0.24505373
  0.13060000   0.23649478
  0.13060000   0.22823732
  0.13060000   0.22027047
  0.13060000   0.21258376
  0.13060000   0.20516713
  0.13060000   0.19801092
  0.13060000   0.19110580
  0.13060000   0.18444281
  0.13080000   0.41013766
  0.13080000   0.39595391
  0.13080000   0.38227308
  0.13080000   0.36907605
  0.13080000   0.35634455
  0.13080000   0.34406112
  0.13080000   0.33220906
  0.13080000   0.32077242
  0.13080000   0.30973590
  0.13080000   0.29908483
  0.13080000   0.28880518
  0.13080000   0.27888346
  0.13080000   0.26930675
  0.13080000   0.26006262
  0.13080000   0.25113915
  0.13080000   0.24252488
  0.13080000   0.23420879
  0.13080000   0.22618029
  0.13080000   0.21842919
  0.13080000   0.21094568
  0.13080000   0.20372034
  0.13080000   0.19674407
  0.13080000   0.19000813
  0.13100000   0.41654059
  0.13100000   0.40239330
  0.13100000   0.38873935
  0.13100000   0.37556021
  0.13100000   0.36283819
  0.13100000   0.35055637
  0.13100000   0.33869858
  0.13100000   0.32724934
  0.13100000   0.31619382
  0.13100000   0.30551780
  0.13100000   0.29520765
  0.13100000   0.28525029
  0.13100000   0.27563316
  0.13100000   0.26634421
  0.13100000   0.25737184
  0.13100000   0.24870490
  0.13100000   0.24033270
  0.13100000   0.23224491
  0.13100000   0.22443163
  0.13100000   0.21688330
  0.13100000   0.20959074
  0.13100000   0.20254510
  0.13100000   0.19573784
  0.13120000   0.42303987
  0.13120000   0.40893371
  0.13120000   0.39531120
  0.13120000   0.38215441
  0.13120000   0.36944622
  0.13120000   0.35717025
  0.13120000   0.34531083
  0.13120000   0.33385297
  0.13120000   0.32278229
  0.13120000   0.31208501
  0.13120000   0.30174793
  0.13120000   0.29175834
  0.13120000   0.28210407
  0.13120000   0.27277340
  0.13120000   0.26375509
  0.13120000   0.25503832
  0.13120000   0.24661267
  0.13120000   0.23846812
  0.13120000   0.23059503
  0.13120000   0.22298411
  0.13120000   0.21562642
  0.13120000   0.20851333
  0.13120000   0.20163654
  0.13140000   0.42963681
  0.13140000   0.41557655
  0.13140000   0.40199018
  0.13140000   0.38886035
  0.13140000   0.37617047
  0.13140000   0.36390472
  0.13140000   0.35204792
  0.13140000   0.34058556
  0.13140000   0.32950371
  0.13140000   0.31878904
  0.13140000   0.30842873
  0.13140000   0.29841049
  0.13140000   0.28872251
  0.13140000   0.27935342
  0.13140000   0.27029231
  0.13140000   0.26152869
  0.13140000   0.25305243
  0.13140000   0.24485381
  0.13140000   0.23692345
  0.13140000   0.22925233
  0.13140000   0.22183175
  0.13140000   0.21465331
  0.13140000   0.20770894
  0.13160000   0.43633269
  0.13160000   0.42232327
  0.13160000   0.40877786
  0.13160000   0.39567971
  0.13160000   0.38301278
  0.13160000   0.37076177
  0.13160000   0.35891199
  0.13160000   0.34744940
  0.13160000   0.33636054
  0.13160000   0.32563249
  0.13160000   0.31525284
  0.13160000   0.30520969
  0.13160000   0.29549158
  0.13160000   0.28608753
  0.13160000   0.27698693
  0.13160000   0.26817961
  0.13160000   0.25965575
  0.13160000   0.25140592
  0.13160000   0.24342101
  0.13160000   0.23569226
  0.13160000   0.22821120
  0.13160000   0.22096969
  0.13160000   0.21395986
  0.13180000   0.44312883
  0.13180000   0.42917528
  0.13180000   0.41567581
  0.13180000   0.40261421
  0.13180000   0.38997501
  0.13180000   0.37774339
  0.13180000   0.36590519
  0.13180000   0.35444682
  0.13180000   0.34335525
  0.13180000   0.33261799
  0.13180000   0.32222305
  0.13180000   0.31215890
  0.13180000   0.30241445
  0.13180000   0.29297905
  0.13180000   0.28384244
  0.13180000   0.27499476
  0.13180000   0.26642650
  0.13180000   0.25812850
  0.13180000   0.25009193
  0.13180000   0.24230829
  0.13180000   0.23476935
  0.13180000   0.22746721
  0.13180000   0.22039422
  0.13200000   0.45002655
  0.13200000   0.43613405
  0.13200000   0.42268561
  0.13200000   0.40966558
  0.13200000   0.39705902
  0.13200000   0.38485162
  0.13200000   0.37302970
  0.13200000   0.36158014
  0.13200000   0.35049034
  0.13200000   0.33974823
  0.13200000   0.32934222
  0.13200000   0.31926114
  0.13200000   0.30949429
  0.13200000   0.30003135
  0.13200000   0.29086241
  0.13200000   0.28197789
  0.13200000   0.27336860
  0.13200000   0.26502565
  0.13200000   0.25694051
  0.13200000   0.24910490
  0.13200000   0.24151087
  0.13200000   0.23415074
  0.13200000   0.22701708
  0.13220000   0.45702717
  0.13220000   0.44320103
  0.13220000   0.42980886
  0.13220000   0.41683556
  0.13220000   0.40426671
  0.13220000   0.39208851
  0.13220000   0.38028774
  0.13220000   0.36885174
  0.13220000   0.35776835
  0.13220000   0.34702591
  0.13220000   0.33661321
  0.13220000   0.32651948
  0.13220000   0.31673436
  0.13220000   0.30724788
  0.13220000   0.29805044
  0.13220000   0.28913279
  0.13220000   0.28048603
  0.13220000   0.27210156
  0.13220000   0.26397111
  0.13220000   0.25608666
  0.13220000   0.24844052
  0.13220000   0.24102522
  0.13220000   0.23383358
  0.13240000   0.46413203
  0.13240000   0.45037770
  0.13240000   0.43704717
  0.13240000   0.42412590
  0.13240000   0.41159998
  0.13240000   0.39945610
  0.13240000   0.38768152
  0.13240000   0.37626401
  0.13240000   0.36519185
  0.13240000   0.35445377
  0.13240000   0.34403896
  0.13240000   0.33393702
  0.13240000   0.32413794
  0.13240000   0.31463209
  0.13240000   0.30541020
  0.13240000   0.29646333
  0.13240000   0.28778286
  0.13240000   0.27936049
  0.13240000   0.27118819
  0.13240000   0.26325824
  0.13240000   0.25556316
  0.13240000   0.24809573
  0.13240000   0.24084899
  0.13260000   0.47134248
  0.13260000   0.45766552
  0.13260000   0.44440216
  0.13260000   0.43153837
  0.13260000   0.41906076
  0.13260000   0.40695650
  0.13260000   0.39521330
  0.13260000   0.38381938
  0.13260000   0.37276342
  0.13260000   0.36203458
  0.13260000   0.35162242
  0.13260000   0.34151690
  0.13260000   0.33170837
  0.13260000   0.32218754
  0.13260000   0.31294543
  0.13260000   0.30397344
  0.13260000   0.29526322
  0.13260000   0.28680676
  0.13260000   0.27859631
  0.13260000   0.27062438
  0.13260000   0.26288375
  0.13260000   0.25536743
  0.13260000   0.24806869
  0.13280000   0.47865985
  0.13280000   0.46506599
  0.13280000   0.45187546
  0.13280000   0.43907476
  0.13280000   0.42665099
  0.13280000   0.41459179
  0.13280000   0.40288534
  0.13280000   0.39152027
  0.13280000   0.38048570
  0.13280000   0.36977115
  0.13280000   0.35936658
  0.13280000   0.34926231
  0.13280000   0.33944903
  0.13280000   0.32991778
  0.13280000   0.32065991
  0.13280000   0.31166710
  0.13280000   0.30293131
  0.13280000   0.29444480
  0.13280000   0.28620008
  0.13280000   0.27818992
  0.13280000   0.27040734
  0.13280000   0.26284560
  0.13280000   0.25549816
  0.13300000   0.48608552
  0.13300000   0.47258060
  0.13300000   0.45946871
  0.13300000   0.44673685
  0.13300000   0.43437261
  0.13300000   0.42236410
  0.13300000   0.41069993
  0.13300000   0.39936916
  0.13300000   0.38836131
  0.13300000   0.37766631
  0.13300000   0.36727447
  0.13300000   0.35717647
  0.13300000   0.34736334
  0.13300000   0.33782645
  0.13300000   0.32855746
  0.13300000   0.31954836
  0.13300000   0.31079139
  0.13300000   0.30227907
  0.13300000   0.29400420
  0.13300000   0.28595978
  0.13300000   0.27813909
  0.13300000   0.27053560
  0.13300000   0.26314301
  0.13320000   0.49362083
  0.13320000   0.48021086
  0.13320000   0.46718356
  0.13320000   0.45452646
  0.13320000   0.44222760
  0.13320000   0.43027556
  0.13320000   0.41865937
  0.13320000   0.40736852
  0.13320000   0.39639294
  0.13320000   0.38572291
  0.13320000   0.37534913
  0.13320000   0.36526263
  0.13320000   0.35545476
  0.13320000   0.34591722
  0.13320000   0.33664199
  0.13320000   0.32762133
  0.13320000   0.31884778
  0.13320000   0.31031414
  0.13320000   0.30201344
  0.13320000   0.29393897
  0.13320000   0.28608422
  0.13320000   0.27844291
  0.13320000   0.27100895
  0.13340000   0.50126715
  0.13340000   0.48795826
  0.13340000   0.47502168
  0.13340000   0.46244539
  0.13340000   0.45021793
  0.13340000   0.43832830
  0.13340000   0.42676599
  0.13340000   0.41552087
  0.13340000   0.40458327
  0.13340000   0.39394385
  0.13340000   0.38359367
  0.13340000   0.37352408
  0.13340000   0.36372680
  0.13340000   0.35419382
  0.13340000   0.34491742
  0.13340000   0.33589017
  0.13340000   0.32710488
  0.13340000   0.31855462
  0.13340000   0.31023268
  0.13340000   0.30213259
  0.13340000   0.29424808
  0.13340000   0.28657311
  0.13340000   0.27910180
  0.13360000   0.50902586
  0.13360000   0.49582434
  0.13360000   0.48298471
  0.13360000   0.47049547
  0.13360000   0.45834558
  0.13360000   0.44652450
  0.13360000   0.43502212
  0.13360000   0.42382873
  0.13360000   0.41293503
  0.13360000   0.40233205
  0.13360000   0.39201119
  0.13360000   0.38196417
  0.13360000   0.37218300
  0.13360000   0.36266000
  0.13360000   0.35338775
  0.13360000   0.34435910
  0.13360000   0.33556713
  0.13360000   0.32700519
  0.13360000   0.31866683
  0.13360000   0.31054580
  0.13360000   0.30263609
  0.13360000   0.29493186
  0.13360000   0.28742747
  0.13380000   0.51689833
  0.13380000   0.50381060
  0.13380000   0.49107434
  0.13380000   0.47867852
  0.13380000   0.46661255
  0.13380000   0.45486632
  0.13380000   0.44343012
  0.13380000   0.43229464
  0.13380000   0.42145094
  0.13380000   0.41089043
  0.13380000   0.40060485
  0.13380000   0.39058624
  0.13380000   0.38082694
  0.13380000   0.37131957
  0.13380000   0.36205701
  0.13380000   0.35303238
  0.13380000   0.34423906
  0.13380000   0.33567063
  0.13380000   0.32732089
  0.13380000   0.31918387
  0.13380000   0.31125376
  0.13380000   0.30352495
  0.13380000   0.29599202
  0.13400000   0.52488594
  0.13400000   0.51191856
  0.13400000   0.49929224
  0.13400000   0.48699639
  0.13400000   0.47502086
  0.13400000   0.46335595
  0.13400000   0.45199236
  0.13400000   0.44092115
  0.13400000   0.43013377
  0.13400000   0.41962196
  0.13400000   0.40937781
  0.13400000   0.39939368
  0.13400000   0.38966223
  0.13400000   0.38017637
  0.13400000   0.37092927
  0.13400000   0.36191434
  0.13400000   0.35312521
  0.13400000   0.34455573
  0.13400000   0.33619995
  0.13400000   0.32805212
  0.13400000   0.32010668
  0.13400000   0.31235823
  0.13400000   0.30480156
  0.13420000   0.53299006
  0.13420000   0.52014976
  0.13420000   0.50764009
  0.13420000   0.49545091
  0.13420000   0.48357250
  0.13420000   0.47199557
  0.13420000   0.46071120
  0.13420000   0.44971084
  0.13420000   0.43898628
  0.13420000   0.42852962
  0.13420000   0.41833327
  0.13420000   0.40838991
  0.13420000   0.39869251
  0.13420000   0.38923428
  0.13420000   0.38000866
  0.13420000   0.37100934
  0.13420000   0.36223021
  0.13420000   0.35366538
  0.13420000   0.34530914
  0.13420000   0.33715596
  0.13420000   0.32920052
  0.13420000   0.32143765
  0.13420000   0.31386233
  0.13440000   0.54121208
  0.13440000   0.52850571
  0.13440000   0.51611957
  0.13440000   0.50404393
  0.13440000   0.49226950
  0.13440000   0.48078739
  0.13440000   0.46958905
  0.13440000   0.45866629
  0.13440000   0.44801126
  0.13440000   0.43761640
  0.13440000   0.42747444
  0.13440000   0.41757837
  0.13440000   0.40792146
  0.13440000   0.39849721
  0.13440000   0.38929934
  0.13440000   0.38032180
  0.13440000   0.37155874
  0.13440000   0.36300451
  0.13440000   0.35465365
  0.13440000   0.34650087
  0.13440000   0.33854106
  0.13440000   0.33076925
  0.13440000   0.32318065
  0.13460000   0.54955337
  0.13460000   0.53698795
  0.13460000   0.52473236
  0.13460000   0.51277730
  0.13460000   0.50111389
  0.13460000   0.48973360
  0.13460000   0.47862828
  0.13460000   0.46779009
  0.13460000   0.45721151
  0.13460000   0.44688532
  0.13460000   0.43680456
  0.13460000   0.42696253
  0.13460000   0.41735278
  0.13460000   0.40796911
  0.13460000   0.39880549
  0.13460000   0.38985615
  0.13460000   0.38111549
  0.13460000   0.37257810
  0.13460000   0.36423875
  0.13460000   0.35609238
  0.13460000   0.34813410
  0.13460000   0.34035915
  0.13460000   0.33276295
  0.13480000   0.55801531
  0.13480000   0.54559800
  0.13480000   0.53348015
  0.13480000   0.52165288
  0.13480000   0.51010768
  0.13480000   0.49883642
  0.13480000   0.48783130
  0.13480000   0.47708483
  0.13480000   0.46658984
  0.13480000   0.45633940
  0.13480000   0.44632687
  0.13480000   0.43654586
  0.13480000   0.42699019
  0.13480000   0.41765394
  0.13480000   0.40853135
  0.13480000   0.39961690
  0.13480000   0.39090523
  0.13480000   0.38239119
  0.13480000   0.37406976
  0.13480000   0.36593610
  0.13480000   0.35798555
  0.13480000   0.35021355
  0.13480000   0.34261572
  0.13500000   0.56659928
  0.13500000   0.55433739
  0.13500000   0.54236462
  0.13500000   0.53067249
  0.13500000   0.51925289
  0.13500000   0.50809805
  0.13500000   0.49720051
  0.13500000   0.48655313
  0.13500000   0.47614904
  0.13500000   0.46598166
  0.13500000   0.45604463
  0.13500000   0.44633185
  0.13500000   0.43683743
  0.13500000   0.42755569
  0.13500000   0.41848116
  0.13500000   0.40960855
  0.13500000   0.40093275
  0.13500000   0.39244883
  0.13500000   0.38415202
  0.13500000   0.37603769
  0.13500000   0.36810136
  0.13500000   0.36033871
  0.13500000   0.35274554
  0.13520000   0.57530664
  0.13520000   0.56320763
  0.13520000   0.55138745
  0.13520000   0.53983801
  0.13520000   0.52855156
  0.13520000   0.51752069
  0.13520000   0.50673830
  0.13520000   0.49619757
  0.13520000   0.48589195
  0.13520000   0.47581515
  0.13520000   0.46596112
  0.13520000   0.45632402
  0.13520000   0.44689824
  0.13520000   0.43767837
  0.13520000   0.42865918
  0.13520000   0.41983564
  0.13520000   0.41120287
  0.13520000   0.40275616
  0.13520000   0.39449095
  0.13520000   0.38640284
  0.13520000   0.37848755
  0.13520000   0.37074097
  0.13520000   0.36315906
  0.13540000   0.58413877
  0.13540000   0.57221024
  0.13540000   0.56055031
  0.13540000   0.54915125
  0.13540000   0.53800569
  0.13540000   0.52710656
  0.13540000   0.51644709
  0.13540000   0.50602078
  0.13540000   0.49582138
  0.13540000   0.48584291
  0.13540000   0.47607959
  0.13540000   0.46652587
  0.13540000   0.45717639
  0.13540000   0.44802600
  0.13540000   0.43906972
  0.13540000   0.43030275
  0.13540000   0.42172043
  0.13540000   0.41331829
  0.13540000   0.40509198
  0.13540000   0.39703730
  0.13540000   0.38915018
  0.13540000   0.38142669
  0.13540000   0.37386300
  0.13560000   0.59309702
  0.13560000   0.58134673
  0.13560000   0.56985486
  0.13560000   0.55861406
  0.13560000   0.54761730
  0.13560000   0.53685784
  0.13560000   0.52632925
  0.13560000   0.51602533
  0.13560000   0.50594014
  0.13560000   0.49606797
  0.13560000   0.48640332
  0.13560000   0.47694091
  0.13560000   0.46767564
  0.13560000   0.45860261
  0.13560000   0.44971706
  0.13560000   0.44101443
  0.13560000   0.43249030
  0.13560000   0.42414039
  0.13560000   0.41596058
  0.13560000   0.40794685
  0.13560000   0.40009535
  0.13560000   0.39240231
  0.13560000   0.38486411
  0.13580000   0.60218274
  0.13580000   0.59061860
  0.13580000   0.57930276
  0.13580000   0.56822825
  0.13580000   0.55738838
  0.13580000   0.54677673
  0.13580000   0.53638718
  0.13580000   0.52621383
  0.13580000   0.51625103
  0.13580000   0.50649336
  0.13580000   0.49693558
  0.13580000   0.48757266
  0.13580000   0.47839977
  0.13580000   0.46941222
  0.13580000   0.46060551
  0.13580000   0.45197529
  0.13580000   0.44351735
  0.13580000   0.43522764
  0.13580000   0.42710223
  0.13580000   0.41913730
  0.13580000   0.41132918
  0.13580000   0.40367430
  0.13580000   0.39616921
  0.13600000   0.61139728
  0.13600000   0.60002733
  0.13600000   0.58889567
  0.13600000   0.57799565
  0.13600000   0.56732093
  0.13600000   0.55686540
  0.13600000   0.54662324
  0.13600000   0.53658884
  0.13600000   0.52675685
  0.13600000   0.51712210
  0.13600000   0.50767961
  0.13600000   0.49842462
  0.13600000   0.48935251
  0.13600000   0.48045885
  0.13600000   0.47173935
  0.13600000   0.46318989
  0.13600000   0.45480646
  0.13600000   0.44658522
  0.13600000   0.43852242
  0.13600000   0.43061446
  0.13600000   0.42285783
  0.13600000   0.41524915
  0.13600000   0.40778514
  0.13620000   0.62074195
  0.13620000   0.60957440
  0.13620000   0.59863520
  0.13620000   0.58791805
  0.13620000   0.57741691
  0.13620000   0.56712600
  0.13620000   0.55703978
  0.13620000   0.54715293
  0.13620000   0.53746037
  0.13620000   0.52795718
  0.13620000   0.51863866
  0.13620000   0.50950026
  0.13620000   0.50053761
  0.13620000   0.49174651
  0.13620000   0.48312288
  0.13620000   0.47466281
  0.13620000   0.46636250
  0.13620000   0.45821830
  0.13620000   0.45022665
  0.13620000   0.44238415
  0.13620000   0.43468745
  0.13620000   0.42713336
  0.13620000   0.41971875
  0.13640000   0.63021809
  0.13640000   0.61926127
  0.13640000   0.60852298
  0.13640000   0.59799723
  0.13640000   0.58767828
  0.13640000   0.57756067
  0.13640000   0.56763914
  0.13640000   0.55790864
  0.13640000   0.54836434
  0.13640000   0.53900160
  0.13640000   0.52981593
  0.13640000   0.52080304
  0.13640000   0.51195879
  0.13640000   0.50327918
  0.13640000   0.49476035
  0.13640000   0.48639859
  0.13640000   0.47819031
  0.13640000   0.47013203
  0.13640000   0.46222040
  0.13640000   0.45445217
  0.13640000   0.44682419
  0.13640000   0.43933342
  0.13640000   0.43197691
  0.13660000   0.63982698
  0.13660000   0.62908939
  0.13660000   0.61856060
  0.13660000   0.60823494
  0.13660000   0.59810698
  0.13660000   0.58817153
  0.13660000   0.57842362
  0.13660000   0.56885847
  0.13660000   0.55947149
  0.13660000   0.55025828
  0.13660000   0.54121461
  0.13660000   0.53233641
  0.13660000   0.52361973
  0.13660000   0.51506082
  0.13660000   0.50665600
  0.13660000   0.49840177
  0.13660000   0.49029472
  0.13660000   0.48233156
  0.13660000   0.47450912
  0.13660000   0.46682432
  0.13660000   0.45927418
  0.13660000   0.45185583
  0.13660000   0.44456645
  0.13680000   0.64956991
  0.13680000   0.63906017
  0.13680000   0.62874963
  0.13680000   0.61863292
  0.13680000   0.60870490
  0.13680000   0.59896067
  0.13680000   0.58939550
  0.13680000   0.58000489
  0.13680000   0.57078450
  0.13680000   0.56173015
  0.13680000   0.55283785
  0.13680000   0.54410373
  0.13680000   0.53552409
  0.13680000   0.52709533
  0.13680000   0.51881402
  0.13680000   0.51067682
  0.13680000   0.50268050
  0.13680000   0.49482197
  0.13680000   0.48709822
  0.13680000   0.47950634
  0.13680000   0.47204351
  0.13680000   0.46470701
  0.13680000   0.45749420
  0.13700000   0.65944814
  0.13700000   0.64917502
  0.13700000   0.63909163
  0.13700000   0.62919288
  0.13700000   0.61947393
  0.13700000   0.60993013
  0.13700000   0.60055703
  0.13700000   0.59135036
  0.13700000   0.58230603
  0.13700000   0.57342008
  0.13700000   0.56468875
  0.13700000   0.55610837
  0.13700000   0.54767544
  0.13700000   0.53938659
  0.13700000   0.53123854
  0.13700000   0.52322815
  0.13700000   0.51535238
  0.13700000   0.50760830
  0.13700000   0.49999306
  0.13700000   0.49250392
  0.13700000   0.48513821
  0.13700000   0.47789338
  0.13700000   0.47076691
  0.13720000   0.66946291
  0.13720000   0.65943532
  0.13720000   0.64958811
  0.13720000   0.63991649
  0.13720000   0.63041590
  0.13720000   0.62108193
  0.13720000   0.61191040
  0.13720000   0.60289727
  0.13720000   0.59403867
  0.13720000   0.58533089
  0.13720000   0.57677034
  0.13720000   0.56835360
  0.13720000   0.56007734
  0.13720000   0.55193838
  0.13720000   0.54393364
  0.13720000   0.53606014
  0.13720000   0.52831501
  0.13720000   0.52069550
  0.13720000   0.51319891
  0.13720000   0.50582267
  0.13720000   0.49856425
  0.13720000   0.49142123
  0.13720000   0.48439126
  0.13740000   0.67961543
  0.13740000   0.66984240
  0.13740000   0.66024056
  0.13740000   0.65080540
  0.13740000   0.64153261
  0.13740000   0.63241805
  0.13740000   0.62345776
  0.13740000   0.61464796
  0.13740000   0.60598498
  0.13740000   0.59746533
  0.13740000   0.58908563
  0.13740000   0.58084264
  0.13740000   0.57273325
  0.13740000   0.56475443
  0.13740000   0.55690330
  0.13740000   0.54917704
  0.13740000   0.54157296
  0.13740000   0.53408845
  0.13740000   0.52672098
  0.13740000   0.51946810
  0.13740000   0.51232747
  0.13740000   0.50529678
  0.13740000   0.49837383
  0.13760000   0.68990690
  0.13760000   0.68039759
  0.13760000   0.67105044
  0.13760000   0.66186120
  0.13760000   0.65282582
  0.13760000   0.64394040
  0.13760000   0.63520122
  0.13760000   0.62660471
  0.13760000   0.61814743
  0.13760000   0.60982609
  0.13760000   0.60163751
  0.13760000   0.59357864
  0.13760000   0.58564654
  0.13760000   0.57783838
  0.13760000   0.57015142
  0.13760000   0.56258304
  0.13760000   0.55513069
  0.13760000   0.54779191
  0.13760000   0.54056432
  0.13760000   0.53344563
  0.13760000   0.52643362
  0.13760000   0.51952613
  0.13760000   0.51272107
  0.13780000   0.70033845
  0.13780000   0.69110217
  0.13780000   0.68201916
  0.13780000   0.67308546
  0.13780000   0.66429724
  0.13780000   0.65565086
  0.13780000   0.64714282
  0.13780000   0.63876975
  0.13780000   0.63052844
  0.13780000   0.62241579
  0.13780000   0.61442881
  0.13780000   0.60656463
  0.13780000   0.59882049
  0.13780000   0.59119374
  0.13780000   0.58368180
  0.13780000   0.57628219
  0.13780000   0.56899253
  0.13780000   0.56181050
  0.13780000   0.55473388
  0.13780000   0.54776050
  0.13780000   0.54088827
  0.13780000   0.53411518
  0.13780000   0.52743926
  0.13800000   0.71091122
  0.13800000   0.70195737
  0.13800000   0.69314809
  0.13800000   0.68447966
  0.13800000   0.67594852
  0.13800000   0.66755123
  0.13800000   0.65928451
  0.13800000   0.65114522
  0.13800000   0.64313034
  0.13800000   0.63523694
  0.13800000   0.62746225
  0.13800000   0.61980356
  0.13800000   0.61225828
  0.13800000   0.60482392
  0.13800000   0.59749807
  0.13800000   0.59027840
  0.13800000   0.58316267
  0.13800000   0.57614871
  0.13800000   0.56923442
  0.13800000   0.56241779
  0.13800000   0.55569684
  0.13800000   0.54906969
  0.13800000   0.54253450
  0.13820000   0.72162629
  0.13820000   0.71296439
  0.13820000   0.70443854
  0.13820000   0.69604527
  0.13820000   0.68778124
  0.13820000   0.67964324
  0.13820000   0.67162820
  0.13820000   0.66373318
  0.13820000   0.65595535
  0.13820000   0.64829198
  0.13820000   0.64074045
  0.13820000   0.63329825
  0.13820000   0.62596295
  0.13820000   0.61873220
  0.13820000   0.61160375
  0.13820000   0.60457543
  0.13820000   0.59764513
  0.13820000   0.59081082
  0.13820000   0.58407053
  0.13820000   0.57742238
  0.13820000   0.57086452
  0.13820000   0.56439518
  0.13820000   0.55801263
  0.13840000   0.73248470
  0.13840000   0.72412438
  0.13840000   0.71589179
  0.13840000   0.70778368
  0.13840000   0.69979693
  0.13840000   0.69192856
  0.13840000   0.68417570
  0.13840000   0.67653560
  0.13840000   0.66900561
  0.13840000   0.66158320
  0.13840000   0.65426591
  0.13840000   0.64705139
  0.13840000   0.63993738
  0.13840000   0.63292168
  0.13840000   0.62600218
  0.13840000   0.61917686
  0.13840000   0.61244374
  0.13840000   0.60580092
  0.13840000   0.59924657
  0.13840000   0.59277892
  0.13840000   0.58639624
  0.13840000   0.58009688
  0.13840000   0.57387922
  0.13860000   0.74348745
  0.13860000   0.73543845
  0.13860000   0.72750904
  0.13860000   0.71969620
  0.13860000   0.71199704
  0.13860000   0.70440876
  0.13860000   0.69692871
  0.13860000   0.68955433
  0.13860000   0.68228314
  0.13860000   0.67511278
  0.13860000   0.66804097
  0.13860000   0.66106552
  0.13860000   0.65418430
  0.13860000   0.64739528
  0.13860000   0.64069650
  0.13860000   0.63408604
  0.13860000   0.62756208
  0.13860000   0.62112285
  0.13860000   0.61476663
  0.13860000   0.60849177
  0.13860000   0.60229666
  0.13860000   0.59617975
  0.13860000   0.59013954
  0.13880000   0.75463548
  0.13880000   0.74690763
  0.13880000   0.73929143
  0.13880000   0.73178409
  0.13880000   0.72438292
  0.13880000   0.71708533
  0.13880000   0.70988885
  0.13880000   0.70279111
  0.13880000   0.69578981
  0.13880000   0.68888276
  0.13880000   0.68206783
  0.13880000   0.67534298
  0.13880000   0.66870625
  0.13880000   0.66215574
  0.13880000   0.65568962
  0.13880000   0.64930611
  0.13880000   0.64300352
  0.13880000   0.63678019
  0.13880000   0.63063453
  0.13880000   0.62456500
  0.13880000   0.61857009
  0.13880000   0.61264837
  0.13880000   0.60679844
  0.13900000   0.76592969
  0.13900000   0.75853290
  0.13900000   0.75124004
  0.13900000   0.74404852
  0.13900000   0.73695584
  0.13900000   0.72995964
  0.13900000   0.72305761
  0.13900000   0.71624757
  0.13900000   0.70952738
  0.13900000   0.70289501
  0.13900000   0.69634851
  0.13900000   0.68988597
  0.13900000   0.68350557
  0.13900000   0.67720555
  0.13900000   0.67098422
  0.13900000   0.66483993
  0.13900000   0.65877110
  0.13900000   0.65277620
  0.13900000   0.64685374
  0.13900000   0.64100230
  0.13900000   0.63522048
  0.13900000   0.62950694
  0.13900000   0.62386039
  0.13920000   0.77737091
  0.13920000   0.77031519
  0.13920000   0.76335586
  0.13920000   0.75649055
  0.13920000   0.74971698
  0.13920000   0.74303295
  0.13920000   0.73643636
  0.13920000   0.72992516
  0.13920000   0.72349742
  0.13920000   0.71715125
  0.13920000   0.71088483
  0.13920000   0.70469643
  0.13920000   0.69858435
  0.13920000   0.69254696
  0.13920000   0.68658271
  0.13920000   0.68069006
  0.13920000   0.67486756
  0.13920000   0.66911379
  0.13920000   0.66342737
  0.13920000   0.65780698
  0.13920000   0.65225133
  0.13920000   0.64675918
  0.13920000   0.64132933
  0.13940000   0.78895993
  0.13940000   0.78225532
  0.13940000   0.77563980
  0.13940000   0.76911119
  0.13940000   0.76266740
  0.13940000   0.75630642
  0.13940000   0.75002631
  0.13940000   0.74382522
  0.13940000   0.73770135
  0.13940000   0.73165297
  0.13940000   0.72567842
  0.13940000   0.71977609
  0.13940000   0.71394443
  0.13940000   0.70818193
  0.13940000   0.70248717
  0.13940000   0.69685873
  0.13940000   0.69129527
  0.13940000   0.68579547
  0.13940000   0.68035808
  0.13940000   0.67498188
  0.13940000   0.66966566
  0.13940000   0.66440829
  0.13940000   0.65920866
  0.13960000   0.80069745
  0.13960000   0.79435407
  0.13960000   0.78809267
  0.13960000   0.78191130
  0.13960000   0.77580803
  0.13960000   0.76978103
  0.13960000   0.76382855
  0.13960000   0.75794888
  0.13960000   0.75214038
  0.13960000   0.74640148
  0.13960000   0.74073065
  0.13960000   0.73512641
  0.13960000   0.72958736
  0.13960000   0.72411211
  0.13960000   0.71869935
  0.13960000   0.71334778
  0.13960000   0.70805618
  0.13960000   0.70282334
  0.13960000   0.69764809
  0.13960000   0.69252933
  0.13960000   0.68746594
  0.13960000   0.68245689
  0.13960000   0.67750114
  0.13980000   0.81258411
  0.13980000   0.80661210
  0.13980000   0.80071521
  0.13980000   0.79489165
  0.13980000   0.78913969
  0.13980000   0.78345766
  0.13980000   0.77784398
  0.13980000   0.77229710
  0.13980000   0.76681553
  0.13980000   0.76139783
  0.13980000   0.75604263
  0.13980000   0.75074858
  0.13980000   0.74551438
  0.13980000   0.74033880
  0.13980000   0.73522062
  0.13980000   0.73015867
  0.13980000   0.72515182
  0.13980000   0.72019897
  0.13980000   0.71529907
  0.13980000   0.71045109
  0.13980000   0.70565403
  0.13980000   0.70090691
  0.13980000   0.69620882
  0.14000000   0.82462044
  0.14000000   0.81903000
  0.14000000   0.81350802
  0.14000000   0.80805288
  0.14000000   0.80266304
  0.14000000   0.79733700
  0.14000000   0.79207333
  0.14000000   0.78687063
  0.14000000   0.78172756
  0.14000000   0.77664284
  0.14000000   0.77161520
  0.14000000   0.76664344
  0.14000000   0.76172639
  0.14000000   0.75686291
  0.14000000   0.75205192
  0.14000000   0.74729236
  0.14000000   0.74258319
  0.14000000   0.73792343
  0.14000000   0.73331210
  0.14000000   0.72874829
  0.14000000   0.72423107
  0.14000000   0.71975958
  0.14000000   0.71533296
  0.14020000   0.83680694
  0.14020000   0.83160827
  0.14020000   0.82647160
  0.14020000   0.82139550
  0.14020000   0.81637860
  0.14020000   0.81141957
  0.14020000   0.80651711
  0.14020000   0.80166999
  0.14020000   0.79687701
  0.14020000   0.79213701
  0.14020000   0.78744887
  0.14020000   0.78281151
  0.14020000   0.77822387
  0.14020000   0.77368494
  0.14020000   0.76919374
  0.14020000   0.76474932
  0.14020000   0.76035075
  0.14020000   0.75599713
  0.14020000   0.75168761
  0.14020000   0.74742133
  0.14020000   0.74319748
  0.14020000   0.73901527
  0.14020000   0.73487393
  0.14040000   0.84914397
  0.14040000   0.84434726
  0.14040000   0.83960632
  0.14040000   0.83491988
  0.14040000   0.83028673
  0.14040000   0.82570569
  0.14040000   0.82117564
  0.14040000   0.81669547
  0.14040000   0.81226413
  0.14040000   0.80788057
  0.14040000   0.80354382
  0.14040000   0.79925291
  0.14040000   0.79500691
  0.14040000   0.79080492
  0.14040000   0.78664605
  0.14040000   0.78252946
  0.14040000   0.77845434
  0.14040000   0.77441987
  0.14040000   0.77042529
  0.14040000   0.76646984
  0.14040000   0.76255279
  0.14040000   0.75867344
  0.14040000   0.75483109
  0.14060000   0.86163182
  0.14060000   0.85724725
  0.14060000   0.85291241
  0.14060000   0.84862621
  0.14060000   0.84438758
  0.14060000   0.84019551
  0.14060000   0.83604899
  0.14060000   0.83194709
  0.14060000   0.82788885
  0.14060000   0.82387340
  0.14060000   0.81989985
  0.14060000   0.81596737
  0.14060000   0.81207514
  0.14060000   0.80822235
  0.14060000   0.80440825
  0.14060000   0.80063208
  0.14060000   0.79689312
  0.14060000   0.79319067
  0.14060000   0.78952404
  0.14060000   0.78589257
  0.14060000   0.78229561
  0.14060000   0.77873253
  0.14060000   0.77520272
  0.14080000   0.87427065
  0.14080000   0.87030837
  0.14080000   0.86638998
  0.14080000   0.86251454
  0.14080000   0.85868114
  0.14080000   0.85488890
  0.14080000   0.85113699
  0.14080000   0.84742456
  0.14080000   0.84375082
  0.14080000   0.84011501
  0.14080000   0.83651635
  0.14080000   0.83295414
  0.14080000   0.82942765
  0.14080000   0.82593620
  0.14080000   0.82247913
  0.14080000   0.81905579
  0.14080000   0.81566553
  0.14080000   0.81230777
  0.14080000   0.80898188
  0.14080000   0.80568731
  0.14080000   0.80242348
  0.14080000   0.79918985
  0.14080000   0.79598588
  0.14100000   0.88706052
  0.14100000   0.88353062
  0.14100000   0.88003894
  0.14100000   0.87658471
  0.14100000   0.87316716
  0.14100000   0.86978555
  0.14100000   0.86643916
  0.14100000   0.86312731
  0.14100000   0.85984931
  0.14100000   0.85660451
  0.14100000   0.85339227
  0.14100000   0.85021197
  0.14100000   0.84706302
  0.14100000   0.84394482
  0.14100000   0.84085682
  0.14100000   0.83779845
  0.14100000   0.83476918
  0.14100000   0.83176848
  0.14100000   0.82879585
  0.14100000   0.82585079
  0.14100000   0.82293282
  0.14100000   0.82004147
  0.14100000   0.81717628
  0.14120000   0.90000138
  0.14120000   0.89691386
  0.14120000   0.89385907
  0.14120000   0.89083639
  0.14120000   0.88784518
  0.14120000   0.88488483
  0.14120000   0.88195477
  0.14120000   0.87905441
  0.14120000   0.87618319
  0.14120000   0.87334059
  0.14120000   0.87052606
  0.14120000   0.86773909
  0.14120000   0.86497920
  0.14120000   0.86224589
  0.14120000   0.85953868
  0.14120000   0.85685713
  0.14120000   0.85420077
  0.14120000   0.85156918
  0.14120000   0.84896193
  0.14120000   0.84637860
  0.14120000   0.84381878
  0.14120000   0.84128209
  0.14120000   0.83876814
  0.14140000   0.91309303
  0.14140000   0.91045778
  0.14140000   0.90784995
  0.14140000   0.90526902
  0.14140000   0.90271449
  0.14140000   0.90018588
  0.14140000   0.89768273
  0.14140000   0.89520457
  0.14140000   0.89275096
  0.14140000   0.89032146
  0.14140000   0.88791566
  0.14140000   0.88553314
  0.14140000   0.88317350
  0.14140000   0.88083635
  0.14140000   0.87852131
  0.14140000   0.87622801
  0.14140000   0.87395607
  0.14140000   0.87170516
  0.14140000   0.86947492
  0.14140000   0.86726502
  0.14140000   0.86507512
  0.14140000   0.86290491
  0.14140000   0.86075408
  0.14160000   0.92633513
  0.14160000   0.92416194
  0.14160000   0.92201096
  0.14160000   0.91988181
  0.14160000   0.91777412
  0.14160000   0.91568750
  0.14160000   0.91362161
  0.14160000   0.91157610
  0.14160000   0.90955062
  0.14160000   0.90754484
  0.14160000   0.90555844
  0.14160000   0.90359111
  0.14160000   0.90164252
  0.14160000   0.89971239
  0.14160000   0.89780041
  0.14160000   0.89590630
  0.14160000   0.89402977
  0.14160000   0.89217056
  0.14160000   0.89032838
  0.14160000   0.88850299
  0.14160000   0.88669412
  0.14160000   0.88490151
  0.14160000   0.88312494
  0.14180000   0.93972721
  0.14180000   0.93802568
  0.14180000   0.93634129
  0.14180000   0.93467376
  0.14180000   0.93302281
  0.14180000   0.93138818
  0.14180000   0.92976963
  0.14180000   0.92816689
  0.14180000   0.92657972
  0.14180000   0.92500789
  0.14180000   0.92345116
  0.14180000   0.92190931
  0.14180000   0.92038210
  0.14180000   0.91886931
  0.14180000   0.91737074
  0.14180000   0.91588618
  0.14180000   0.91441542
  0.14180000   0.91295825
  0.14180000   0.91151448
  0.14180000   0.91008392
  0.14180000   0.90866638
  0.14180000   0.90726168
  0.14180000   0.90586962
  0.14200000   0.95326861
  0.14200000   0.95204818
  0.14200000   0.95083989
  0.14200000   0.94964355
  0.14200000   0.94845900
  0.14200000   0.94728606
  0.14200000   0.94612457
  0.14200000   0.94497437
  0.14200000   0.94383529
  0.14200000   0.94270719
  0.14200000   0.94158991
  0.14200000   0.94048330
  0.14200000   0.93938722
  0.14200000   0.93830152
  0.14200000   0.93722605
  0.14200000   0.93616069
  0.14200000   0.93510530
  0.14200000   0.93405974
  0.14200000   0.93302389
  0.14200000   0.93199760
  0.14200000   0.93098077
  0.14200000   0.92997327
  0.14200000   0.92897496
  0.14220000   0.96695852
  0.14220000   0.96622841
  0.14220000   0.96550548
  0.14220000   0.96478964
  0.14220000   0.96408081
  0.14220000   0.96337890
  0.14220000   0.96268381
  0.14220000   0.96199547
  0.14220000   0.96131378
  0.14220000   0.96063867
  0.14220000   0.95997006
  0.14220000   0.95930786
  0.14220000   0.95865200
  0.14220000   0.95800240
  0.14220000   0.95735898
  0.14220000   0.95672167
  0.14220000   0.95609039
  0.14220000   0.95546508
  0.14220000   0.95484566
  0.14220000   0.95423206
  0.14220000   0.95362422
  0.14220000   0.95302205
  0.14220000   0.95242551
  0.14240000   0.98079595
  0.14240000   0.98056510
  0.14240000   0.98033651
  0.14240000   0.98011015
  0.14240000   0.97988600
  0.14240000   0.97966404
  0.14240000   0.97944425
  0.14240000   0.97922659
  0.14240000   0.97901104
  0.14240000   0.97879759
  0.14240000   0.97858622
  0.14240000   0.97837688
  0.14240000   0.97816958
  0.14240000   0.97796428
  0.14240000   0.97776097
  0.14240000   0.97755961
  0.14240000   0.97736020
  0.14240000   0.97716271
  0.14240000   0.97696713
  0.14240000   0.97677342
  0.14240000   0.97658158
  0.14240000   0.97639158
  0.14240000   0.97620340
  0.14260000   0.99477970
  0.14260000   0.99505678
  0.14260000   0.99533116
  0.14260000   0.99560289
  0.14260000   0.99587197
  0.14260000   0.99613843
  0.14260000   0.99640228
  0.14260000   0.99666357
  0.14260000   0.99692229
  0.14260000   0.99717848
  0.14260000   0.99743216
  0.14260000   0.99768335
  0.14260000   0.99793207
  0.14260000   0.99817835
  0.14260000   0.99842219
  0.14260000   0.99866363
  0.14260000   0.99890269
  0.14260000   0.99913939
  0.14260000   0.99937374
  0.14260000   0.99960577
  0.14260000   0.99983551
  0.14260000   1.00006296
  0.14260000   1.00028815
  0.14280000   1.00890838
  0.14280000   1.00970171
  0.14280000   1.01048735
  0.14280000   1.01126533
  0.14280000   1.01203569
  0.14280000   1.01279850
  0.14280000   1.01355380
  0.14280000   1.01430163
  0.14280000   1.01504204
  0.14280000   1.01577508
  0.14280000   1.01650080
  0.14280000   1.01721925
  0.14280000   1.01793048
  0.14280000   1.01863454
  0.14280000   1.01933147
  0.14280000   1.02002133
  0.14280000   1.02070417
  0.14280000   1.02138003
  0.14280000   1.02204897
  0.14280000   1.02271104
  0.14280000   1.02336629
  0.14280000   1.02401477
  0.14280000   1.02465652
  0.14300000   1.02318036
  0.14300000   1.02449791
  0.14300000   1.02580263
  0.14300000   1.02709456
  0.14300000   1.02837375
  0.14300000   1.02964024
  0.14300000   1.03089409
  0.14300000   1.03213534
  0.14300000   1.03336406
  0.14300000   1.03458028
  0.14300000   1.03578408
  0.14300000   1.03697551
  0.14300000   1.03815462
  0.14300000   1.03932148
  0.14300000   1.04047615
  0.14300000   1.04161869
  0.14300000   1.04274916
  0.14300000   1.04386764
  0.14300000   1.04497418
  0.14300000   1.04606885
  0.14300000   1.04715172
  0.14300000   1.04822286
  0.14300000   1.04928235
  0.14320000   1.03759379
  0.14320000   1.03944310
  0.14320000   1.04127428
  0.14320000   1.04308732
  0.14320000   1.04488225
  0.14320000   1.04665909
  0.14320000   1.04841786
  0.14320000   1.05015860
  0.14320000   1.05188134
  0.14320000   1.05358611
  0.14320000   1.05527296
  0.14320000   1.05694193
  0.14320000   1.05859306
  0.14320000   1.06022642
  0.14320000   1.06184204
  0.14320000   1.06344000
  0.14320000   1.06502034
  0.14320000   1.06658314
  0.14320000   1.06812846
  0.14320000   1.06965637
  0.14320000   1.07116694
  0.14320000   1.07266025
  0.14320000   1.07413638
  0.14340000   1.05214657
  0.14340000   1.05453471
  0.14340000   1.05689917
  0.14340000   1.05923988
  0.14340000   1.06155681
  0.14340000   1.06384991
  0.14340000   1.06611916
  0.14340000   1.06836454
  0.14340000   1.07058603
  0.14340000   1.07278362
  0.14340000   1.07495731
  0.14340000   1.07710712
  0.14340000   1.07923304
  0.14340000   1.08133510
  0.14340000   1.08341332
  0.14340000   1.08546774
  0.14340000   1.08749840
  0.14340000   1.08950533
  0.14340000   1.09148860
  0.14340000   1.09344825
  0.14340000   1.09538435
  0.14340000   1.09729697
  0.14340000   1.09918618
  0.14360000   1.06683632
  0.14360000   1.06976986
  0.14360000   1.07267384
  0.14360000   1.07554812
  0.14360000   1.07839255
  0.14360000   1.08120701
  0.14360000   1.08399137
  0.14360000   1.08674553
  0.14360000   1.08946939
  0.14360000   1.09216287
  0.14360000   1.09482590
  0.14360000   1.09745841
  0.14360000   1.10006036
  0.14360000   1.10263171
  0.14360000   1.10517243
  0.14360000   1.10768251
  0.14360000   1.11016193
  0.14360000   1.11261072
  0.14360000   1.11502888
  0.14360000   1.11741645
  0.14360000   1.11977346
  0.14360000   1.12209996
  0.14360000   1.12439601
  0.14380000   1.08166041
  0.14380000   1.08514531
  0.14380000   1.08859441
  0.14380000   1.09200741
  0.14380000   1.09538404
  0.14380000   1.09872402
  0.14380000   1.10202712
  0.14380000   1.10529309
  0.14380000   1.10852173
  0.14380000   1.11171285
  0.14380000   1.11486626
  0.14380000   1.11798182
  0.14380000   1.12105937
  0.14380000   1.12409881
  0.14380000   1.12710001
  0.14380000   1.13006290
  0.14380000   1.13298741
  0.14380000   1.13587349
  0.14380000   1.13872109
  0.14380000   1.14153022
  0.14380000   1.14430086
  0.14380000   1.14703303
  0.14380000   1.14972677
  0.14400000   1.09661588
  0.14400000   1.10065749
  0.14400000   1.10465658
  0.14400000   1.10861266
  0.14400000   1.11252527
  0.14400000   1.11639395
  0.14400000   1.12021829
  0.14400000   1.12399789
  0.14400000   1.12773239
  0.14400000   1.13142143
  0.14400000   1.13506472
  0.14400000   1.13866195
  0.14400000   1.14221286
  0.14400000   1.14571723
  0.14400000   1.14917483
  0.14400000   1.15258549
  0.14400000   1.15594905
  0.14400000   1.15926538
  0.14400000   1.16253439
  0.14400000   1.16575599
  0.14400000   1.16893013
  0.14400000   1.17205680
  0.14400000   1.17513599
  0.14420000   1.11169947
  0.14420000   1.11630244
  0.14420000   1.12085561
  0.14420000   1.12535824
  0.14420000   1.12980962
  0.14420000   1.13420907
  0.14420000   1.13855595
  0.14420000   1.14284966
  0.14420000   1.14708963
  0.14420000   1.15127532
  0.14420000   1.15540624
  0.14420000   1.15948194
  0.14420000   1.16350200
  0.14420000   1.16746603
  0.14420000   1.17137370
  0.14420000   1.17522470
  0.14420000   1.17901877
  0.14420000   1.18275569
  0.14420000   1.18643527
  0.14420000   1.19005737
  0.14420000   1.19362188
  0.14420000   1.19712872
  0.14420000   1.20057788
  0.14440000   1.12690760
  0.14440000   1.13207582
  0.14440000   1.13718629
  0.14440000   1.14223797
  0.14440000   1.14722983
  0.14440000   1.15216092
  0.14440000   1.15703032
  0.14440000   1.16183716
  0.14440000   1.16658064
  0.14440000   1.17125997
  0.14440000   1.17587446
  0.14440000   1.18042343
  0.14440000   1.18490628
  0.14440000   1.18932245
  0.14440000   1.19367144
  0.14440000   1.19795282
  0.14440000   1.20216619
  0.14440000   1.20631121
  0.14440000   1.21038762
  0.14440000   1.21439518
  0.14440000   1.21833373
  0.14440000   1.22220316
  0.14440000   1.22600341
  0.14460000   1.14223631
  0.14460000   1.14797285
  0.14460000   1.15364292
  0.14460000   1.15924508
  0.14460000   1.16477796
  0.14460000   1.17024025
  0.14460000   1.17563071
  0.14460000   1.18094816
  0.14460000   1.18619147
  0.14460000   1.19135959
  0.14460000   1.19645156
  0.14460000   1.20146647
  0.14460000   1.20640348
  0.14460000   1.21126184
  0.14460000   1.21604086
  0.14460000   1.22073995
  0.14460000   1.22535857
  0.14460000   1.22989627
  0.14460000   1.23435267
  0.14460000   1.23872749
  0.14460000   1.24302049
  0.14460000   1.24723154
  0.14460000   1.25136057
  0.14480000   1.15768130
  0.14480000   1.16398832
  0.14480000   1.17021925
  0.14480000   1.17637220
  0.14480000   1.18244536
  0.14480000   1.18843702
  0.14480000   1.19434554
  0.14480000   1.20016934
  0.14480000   1.20590697
  0.14480000   1.21155705
  0.14480000   1.21711830
  0.14480000   1.22258952
  0.14480000   1.22796964
  0.14480000   1.23325767
  0.14480000   1.23845272
  0.14480000   1.24355402
  0.14480000   1.24856089
  0.14480000   1.25347276
  0.14480000   1.25828917
  0.14480000   1.26300976
  0.14480000   1.26763427
  0.14480000   1.27216256
  0.14480000   1.27659459
  0.14500000   1.17323785
  0.14500000   1.18011656
  0.14500000   1.18690851
  0.14500000   1.19361132
  0.14500000   1.20022265
  0.14500000   1.20674032
  0.14500000   1.21316221
  0.14500000   1.21948632
  0.14500000   1.22571080
  0.14500000   1.23183387
  0.14500000   1.23785391
  0.14500000   1.24376942
  0.14500000   1.24957904
  0.14500000   1.25528152
  0.14500000   1.26087577
  0.14500000   1.26636083
  0.14500000   1.27173590
  0.14500000   1.27700029
  0.14500000   1.28215347
  0.14500000   1.28719505
  0.14500000   1.29212478
  0.14500000   1.29694254
  0.14500000   1.30164837
  0.14520000   1.18890088
  0.14520000   1.19635139
  0.14520000   1.20370336
  0.14520000   1.21095375
  0.14520000   1.21809967
  0.14520000   1.22513834
  0.14520000   1.23206715
  0.14520000   1.23888359
  0.14520000   1.24558532
  0.14520000   1.25217018
  0.14520000   1.25863614
  0.14520000   1.26498136
  0.14520000   1.27120417
  0.14520000   1.27730308
  0.14520000   1.28327678
  0.14520000   1.28912414
  0.14520000   1.29484423
  0.14520000   1.30043629
  0.14520000   1.30589977
  0.14520000   1.31123428
  0.14520000   1.31643963
  0.14520000   1.32151581
  0.14520000   1.32646300
  0.14540000   1.20466482
  0.14540000   1.21268615
  0.14540000   1.22059582
  0.14540000   1.22839011
  0.14540000   1.23606544
  0.14540000   1.24361840
  0.14540000   1.25104575
  0.14540000   1.25834446
  0.14540000   1.26551166
  0.14540000   1.27254472
  0.14540000   1.27944121
  0.14540000   1.28619890
  0.14540000   1.29281584
  0.14540000   1.29929026
  0.14540000   1.30562066
  0.14540000   1.31180577
  0.14540000   1.31784458
  0.14540000   1.32373630
  0.14540000   1.32948040
  0.14540000   1.33507659
  0.14540000   1.34052481
  0.14540000   1.34582526
  0.14540000   1.35097834
  0.14560000   1.22052370
  0.14560000   1.22911363
  0.14560000   1.23757734
  0.14560000   1.24591030
  0.14560000   1.25410817
  0.14560000   1.26216682
  0.14560000   1.27008235
  0.14560000   1.27785110
  0.14560000   1.28546964
  0.14560000   1.29293485
  0.14560000   1.30024384
  0.14560000   1.30739404
  0.14560000   1.31438316
  0.14560000   1.32120922
  0.14560000   1.32787056
  0.14560000   1.33436581
  0.14560000   1.34069394
  0.14560000   1.34685420
  0.14560000   1.35284619
  0.14560000   1.35866979
  0.14560000   1.36432522
  0.14560000   1.36981296
  0.14560000   1.37513380
  0.14580000   1.23647105
  0.14580000   1.24562607
  0.14580000   1.25463869
  0.14580000   1.26350346
  0.14580000   1.27221521
  0.14580000   1.28076901
  0.14580000   1.28916021
  0.14580000   1.29738447
  0.14580000   1.30543779
  0.14580000   1.31331650
  0.14580000   1.32101729
  0.14580000   1.32853720
  0.14580000   1.33587369
  0.14580000   1.34302458
  0.14580000   1.34998809
  0.14580000   1.35676285
  0.14580000   1.36334789
  0.14580000   1.36974264
  0.14580000   1.37594691
  0.14580000   1.38196092
  0.14580000   1.38778527
  0.14580000   1.39342092
  0.14580000   1.39886918
  0.14600000   1.25249993
  0.14600000   1.26221513
  0.14600000   1.27176996
  0.14600000   1.28115797
  0.14600000   1.29037304
  0.14600000   1.29940936
  0.14600000   1.30826149
  0.14600000   1.31692437
  0.14600000   1.32539338
  0.14600000   1.33366431
  0.14600000   1.34173342
  0.14600000   1.34959743
  0.14600000   1.35725355
  0.14600000   1.36469950
  0.14600000   1.37193350
  0.14600000   1.37895426
  0.14600000   1.38576100
  0.14600000   1.39235345
  0.14600000   1.39873183
  0.14600000   1.40489684
  0.14600000   1.41084966
  0.14600000   1.41659189
  0.14600000   1.42212559
  0.14620000   1.26860290
  0.14620000   1.27887188
  0.14620000   1.28896056
  0.14620000   1.29886141
  0.14620000   1.30856723
  0.14620000   1.31807129
  0.14620000   1.32736728
  0.14620000   1.33644942
  0.14620000   1.34531243
  0.14620000   1.35395159
  0.14620000   1.36236276
  0.14620000   1.37054240
  0.14620000   1.37848759
  0.14620000   1.38619601
  0.14620000   1.39366601
  0.14620000   1.40089655
  0.14620000   1.40788720
  0.14620000   1.41463819
  0.14620000   1.42115032
  0.14620000   1.42742499
  0.14620000   1.43346415
  0.14620000   1.43927031
  0.14620000   1.44484647
  0.14640000   1.28477197
  0.14640000   1.29558676
  0.14640000   1.30619921
  0.14640000   1.31660054
  0.14640000   1.32678246
  0.14640000   1.33673721
  0.14640000   1.34645761
  0.14640000   1.35593709
  0.14640000   1.36516977
  0.14640000   1.37415045
  0.14640000   1.38287467
  0.14640000   1.39133870
  0.14640000   1.39953960
  0.14640000   1.40747522
  0.14640000   1.41514416
  0.14640000   1.42254582
  0.14640000   1.42968037
  0.14640000   1.43654872
  0.14640000   1.44315252
  0.14640000   1.44949410
  0.14640000   1.45557647
  0.14640000   1.46140325
  0.14640000   1.46697864
  0.14660000   1.30099862
  0.14660000   1.31234961
  0.14660000   1.32347388
  0.14660000   1.33436135
  0.14660000   1.34500252
  0.14660000   1.35538858
  0.14660000   1.36551143
  0.14660000   1.37536378
  0.14660000   1.38493914
  0.14660000   1.39423192
  0.14660000   1.40323744
  0.14660000   1.41195193
  0.14660000   1.42037262
  0.14660000   1.42849765
  0.14660000   1.43632617
  0.14660000   1.44385823
  0.14660000   1.45109484
  0.14660000   1.45803788
  0.14660000   1.46469012
  0.14660000   1.47105511
  0.14660000   1.47713719
  0.14660000   1.48294138
  0.14660000   1.48847336
  0.14680000   1.31727377
  0.14680000   1.32914958
  0.14680000   1.34077181
  0.14680000   1.35212895
  0.14680000   1.36321027
  0.14680000   1.37400586
  0.14680000   1.38450672
  0.14680000   1.39470484
  0.14680000   1.40459325
  0.14680000   1.41416606
  0.14680000   1.42341852
  0.14680000   1.43234704
  0.14680000   1.44094918
  0.14680000   1.44922368
  0.14680000   1.45717045
  0.14680000   1.46479053
  0.14680000   1.47208605
  0.14680000   1.47906018
  0.14680000   1.48571712
  0.14680000   1.49206196
  0.14680000   1.49810067
  0.14680000   1.50383997
  0.14680000   1.50928728
  0.14700000   1.33358777
  0.14700000   1.34597520
  0.14700000   1.35807950
  0.14700000   1.36988769
  0.14700000   1.38138772
  0.14700000   1.39256861
  0.14700000   1.40342048
  0.14700000   1.41393471
  0.14700000   1.42410394
  0.14700000   1.43392216
  0.14700000   1.44338477
  0.14700000   1.45248855
  0.14700000   1.46123172
  0.14700000   1.46961390
  0.14700000   1.47763610
  0.14700000   1.48530066
  0.14700000   1.49261120
  0.14700000   1.49957254
  0.14700000   1.50619063
  0.14700000   1.51247246
  0.14700000   1.51842592
  0.14700000   1.52405975
  0.14700000   1.52938339
  0.14720000   1.34993040
  0.14720000   1.36281432
  0.14720000   1.37538272
  0.14720000   1.38762107
  0.14720000   1.39951601
  0.14720000   1.41105550
  0.14720000   1.42222887
  0.14720000   1.43302699
  0.14720000   1.44344232
  0.14720000   1.45346894
  0.14720000   1.46310264
  0.14720000   1.47234092
  0.14720000   1.48118297
  0.14720000   1.48962965
  0.14720000   1.49768344
  0.14720000   1.50534837
  0.14720000   1.51262995
  0.14720000   1.51953501
  0.14720000   1.52607165
  0.14720000   1.53224906
  0.14720000   1.53807742
  0.14720000   1.54356773
  0.14720000   1.54873171
  0.14740000   1.36629081
  0.14740000   1.37965411
  0.14740000   1.39266649
  0.14740000   1.40531183
  0.14740000   1.41757548
  0.14740000   1.42944439
  0.14740000   1.44090726
  0.14740000   1.45195462
  0.14740000   1.46257897
  0.14740000   1.47277478
  0.14740000   1.48253858
  0.14740000   1.49186893
  0.14740000   1.50076638
  0.14740000   1.50923347
  0.14740000   1.51727457
  0.14740000   1.52489584
  0.14740000   1.53210506
  0.14740000   1.53891152
  0.14740000   1.54532579
  0.14740000   1.55135964
  0.14740000   1.55702581
  0.14740000   1.56233783
  0.14740000   1.56730989
  0.14760000   1.38265758
  0.14760000   1.39648110
  0.14760000   1.40991511
  0.14760000   1.42294194
  0.14760000   1.43554568
  0.14760000   1.44771241
  0.14760000   1.45943036
  0.14760000   1.47069000
  0.14760000   1.48148415
  0.14760000   1.49180804
  0.14760000   1.50165932
  0.14760000   1.51103804
  0.14760000   1.51994662
  0.14760000   1.52838968
  0.14760000   1.53637401
  0.14760000   1.54390831
  0.14760000   1.55100311
  0.14760000   1.55767050
  0.14760000   1.56392395
  0.14760000   1.56977807
  0.14760000   1.57524843
  0.14760000   1.58035132
  0.14760000   1.58510355
  0.14780000   1.39901869
  0.14780000   1.41328114
  0.14780000   1.42711221
  0.14780000   1.44049267
  0.14780000   1.45340550
  0.14780000   1.46583608
  0.14780000   1.47777242
  0.14780000   1.48920524
  0.14780000   1.50012806
  0.14780000   1.51053731
  0.14780000   1.52043224
  0.14780000   1.52981489
  0.14780000   1.53869003
  0.14780000   1.54706493
  0.14780000   1.55494923
  0.14780000   1.56235471
  0.14780000   1.56929504
  0.14780000   1.57578551
  0.14780000   1.58184280
  0.14780000   1.58748467
  0.14780000   1.59272971
  0.14780000   1.59759709
  0.14780000   1.60210633
  0.14800000   1.41536153
  0.14800000   1.43003945
  0.14800000   1.44424072
  0.14800000   1.45794463
  0.14800000   1.47113321
  0.14800000   1.48379141
  0.14800000   1.49590733
  0.14800000   1.50747232
  0.14800000   1.51848112
  0.14800000   1.52893180
  0.14800000   1.53882579
  0.14800000   1.54816769
  0.14800000   1.55696515
  0.14800000   1.56522865
  0.14800000   1.57297122
  0.14800000   1.58020815
  0.14800000   1.58695667
  0.14800000   1.59323565
  0.14800000   1.59906523
  0.14800000   1.60446651
  0.14800000   1.60946127
  0.14800000   1.61407161
  0.14800000   1.61831977
  0.14820000   1.43167289
  0.14820000   1.44674064
  0.14820000   1.46128296
  0.14820000   1.47527785
  0.14820000   1.48870660
  0.14820000   1.50155406
  0.14820000   1.51380882
  0.14820000   1.52546340
  0.14820000   1.53651423
  0.14820000   1.54696167
  0.14820000   1.55680990
  0.14820000   1.56606669
  0.14820000   1.57474320
  0.14820000   1.58285365
  0.14820000   1.59041498
  0.14820000   1.59744642
  0.14820000   1.60396917
  0.14820000   1.61000593
  0.14820000   1.61558052
  0.14820000   1.62071752
  0.14820000   1.62544191
  0.14820000   1.62977874
  0.14820000   1.63375285
  0.14840000   1.44793899
  0.14840000   1.46336872
  0.14840000   1.47822071
  0.14840000   1.49247186
  0.14840000   1.50610307
  0.14840000   1.51909949
  0.14840000   1.53145074
  0.14840000   1.54315103
  0.14840000   1.55419916
  0.14840000   1.56459840
  0.14840000   1.57435636
  0.14840000   1.58348464
  0.14840000   1.59199851
  0.14840000   1.59991650
  0.14840000   1.60725991
  0.14840000   1.61405236
  0.14840000   1.62031927
  0.14840000   1.62608741
  0.14840000   1.63138440
  0.14840000   1.63623833
  0.14840000   1.64067733
  0.14840000   1.64472928
  0.14840000   1.64842148
  0.14860000   1.46414551
  0.14860000   1.47990716
  0.14860000   1.49503520
  0.14860000   1.50950578
  0.14860000   1.52329978
  0.14860000   1.53640318
  0.14860000   1.54880723
  0.14860000   1.56050850
  0.14860000   1.57150884
  0.14860000   1.58181519
  0.14860000   1.59143928
  0.14860000   1.60039722
  0.14860000   1.60870899
  0.14860000   1.61639794
  0.14860000   1.62349021
  0.14860000   1.63001408
  0.14860000   1.63599945
  0.14860000   1.64147726
  0.14860000   1.64647895
  0.14860000   1.65103603
  0.14860000   1.65517968
  0.14860000   1.65894036
  0.14860000   1.66234758
  0.14880000   1.48027760
  0.14880000   1.49633893
  0.14880000   1.51170730
  0.14880000   1.52635847
  0.14880000   1.54027384
  0.14880000   1.55344083
  0.14880000   1.56585301
  0.14880000   1.57751008
  0.14880000   1.58841772
  0.14880000   1.59858732
  0.14880000   1.60803545
  0.14880000   1.61678338
  0.14880000   1.62485641
  0.14880000   1.63228319
  0.14880000   1.63909501
  0.14880000   1.64532509
  0.14880000   1.65100789
  0.14880000   1.65617854
  0.14880000   1.66087221
  0.14880000   1.66512368
  0.14880000   1.66896688
  0.14880000   1.67243462
  0.14880000   1.67555827
  0.14900000   1.49631995
  0.14900000   1.51264658
  0.14900000   1.52821753
  0.14900000   1.54300862
  0.14900000   1.55700244
  0.14900000   1.57018855
  0.14900000   1.58256364
  0.14900000   1.59413138
  0.14900000   1.60490213
  0.14900000   1.61489249
  0.14900000   1.62412466
  0.14900000   1.63262570
  0.14900000   1.64042674
  0.14900000   1.64756212
  0.14900000   1.65406854
  0.14900000   1.65998426
  0.14900000   1.66534833
  0.14900000   1.67019995
  0.14900000   1.67457781
  0.14900000   1.67851968
  0.14900000   1.68206194
  0.14900000   1.68523936
  0.14900000   1.68808481
  0.14920000   1.51225679
  0.14920000   1.52881232
  0.14920000   1.54454618
  0.14920000   1.55943495
  0.14920000   1.57346308
  0.14920000   1.58662313
  0.14920000   1.59891581
  0.14920000   1.61034964
  0.14920000   1.62094057
  0.14920000   1.63071121
  0.14920000   1.63969010
  0.14920000   1.64791067
  0.14920000   1.65541031
  0.14920000   1.66222935
  0.14920000   1.66841003
  0.14920000   1.67399566
  0.14920000   1.67902975
  0.14920000   1.68355532
  0.14920000   1.68761430
  0.14920000   1.69124706
  0.14920000   1.69449207
  0.14920000   1.69738561
  0.14920000   1.69996164
  0.14940000   1.52807200
  0.14940000   1.54481806
  0.14940000   1.56067350
  0.14940000   1.57561634
  0.14940000   1.58963377
  0.14940000   1.60272230
  0.14940000   1.61488760
  0.14940000   1.62614405
  0.14940000   1.63651404
  0.14940000   1.64602702
  0.14940000   1.65471849
  0.14940000   1.66262879
  0.14940000   1.66980188
  0.14940000   1.67628422
  0.14940000   1.68212362
  0.14940000   1.68736829
  0.14940000   1.69206594
  0.14940000   1.69626309
  0.14940000   1.70000449
  0.14940000   1.70333270
  0.14940000   1.70628779
  0.14940000   1.70890713
  0.14940000   1.71122533
  0.14960000   1.54374911
  0.14960000   1.56064557
  0.14960000   1.57657975
  0.14960000   1.59153200
  0.14960000   1.60549324
  0.14960000   1.61846494
  0.14960000   1.63045880
  0.14960000   1.64149601
  0.14960000   1.65160631
  0.14960000   1.66082675
  0.14960000   1.66920036
  0.14960000   1.67677473
  0.14960000   1.68360063
  0.14960000   1.68973066
  0.14960000   1.69521805
  0.14960000   1.70011563
  0.14960000   1.70447496
  0.14960000   1.70834562
  0.14960000   1.71177470
  0.14960000   1.71480646
  0.14960000   1.71748207
  0.14960000   1.71983954
  0.14960000   1.72191369
  0.14980000   1.55927146
  0.14980000   1.57627655
  0.14980000   1.59224541
  0.14980000   1.60716172
  0.14980000   1.62102118
  0.14980000   1.63383138
  0.14980000   1.64561112
  0.14980000   1.65638941
  0.14980000   1.66620417
  0.14980000   1.67510071
  0.14980000   1.68313005
  0.14980000   1.69034730
  0.14980000   1.69681005
  0.14980000   1.70257692
  0.14980000   1.70770627
  0.14980000   1.71225517
  0.14980000   1.71627854
  0.14980000   1.71982851
  0.14980000   1.72295398
  0.14980000   1.72570037
  0.14980000   1.72810946
  0.14980000   1.73021943
  0.14980000   1.73206489
  0.15000000   1.57462223
  0.15000000   1.59169276
  0.15000000   1.60765131
  0.15000000   1.62248597
  0.15000000   1.63619846
  0.15000000   1.64880362
  0.15000000   1.66032847
  0.15000000   1.67081083
  0.15000000   1.68029756
  0.15000000   1.68884277
  0.15000000   1.69650579
  0.15000000   1.70334934
  0.15000000   1.70943770
  0.15000000   1.71483523
  0.15000000   1.71960500
  0.15000000   1.72380783
  0.15000000   1.72750141
  0.15000000   1.73073986
  0.15000000   1.73357332
  0.15000000   1.73604782
  0.15000000   1.73820529
  0.15000000   1.74008360
  0.15000000   1.74171678
  0.15020000   1.58978453
  0.15020000   1.60687619
  0.15020000   1.62277883
  0.15020000   1.63748621
  0.15020000   1.65100733
  0.15020000   1.66336555
  0.15020000   1.67459719
  0.15020000   1.68474974
  0.15020000   1.69387971
  0.15020000   1.70205040
  0.15020000   1.70932960
  0.15020000   1.71578752
  0.15020000   1.72149491
  0.15020000   1.72652138
  0.15020000   1.73093422
  0.15020000   1.73479734
  0.15020000   1.73817063
  0.15020000   1.74110957
  0.15020000   1.74366494
  0.15020000   1.74588289
  0.15020000   1.74780498
  0.15020000   1.74946841
  0.15020000   1.75090627
  0.15040000   1.60474156
  0.15040000   1.62180915
  0.15040000   1.63761003
  0.15040000   1.65214501
  0.15040000   1.66543170
  0.15040000   1.67750320
  0.15040000   1.68840619
  0.15040000   1.69819864
  0.15040000   1.70694721
  0.15040000   1.71472461
  0.15040000   1.72160710
  0.15040000   1.72767211
  0.15040000   1.73299638
  0.15040000   1.73765425
  0.15040000   1.74171654
  0.15040000   1.74524963
  0.15040000   1.74831493
  0.15040000   1.75096863
  0.15040000   1.75326162
  0.15040000   1.75523963
  0.15040000   1.75694345
  0.15040000   1.75840923
  0.15040000   1.75966882
  0.15060000   1.61947670
  0.15060000   1.63647445
  0.15060000   1.65212788
  0.15060000   1.66644629
  0.15060000   1.67945728
  0.15060000   1.69120487
  0.15060000   1.70174710
  0.15060000   1.71115306
  0.15060000   1.71949992
  0.15060000   1.72686986
  0.15060000   1.73334733
  0.15060000   1.73901659
  0.15060000   1.74395977
  0.15060000   1.74825527
  0.15060000   1.75197671
  0.15060000   1.75519222
  0.15060000   1.75796406
  0.15060000   1.76034853
  0.15060000   1.76239607
  0.15060000   1.76415156
  0.15060000   1.76565460
  0.15060000   1.76693998
  0.15060000   1.76803812
  0.15080000   1.63397360
  0.15080000   1.65085556
  0.15080000   1.66631643
  0.15080000   1.68037551
  0.15080000   1.69307177
  0.15080000   1.70446133
  0.15080000   1.71461438
  0.15080000   1.72361166
  0.15080000   1.73154097
  0.15080000   1.73849381
  0.15080000   1.74456242
  0.15080000   1.74983729
  0.15080000   1.75440521
  0.15080000   1.75834788
  0.15080000   1.76174096
  0.15080000   1.76465360
  0.15080000   1.76714823
  0.15080000   1.76928068
  0.15080000   1.77110047
  0.15080000   1.77265117
  0.15080000   1.77397091
  0.15080000   1.77509288
  0.15080000   1.77604582
  0.15100000   1.64821639
  0.15100000   1.66493677
  0.15100000   1.68016095
  0.15100000   1.69391982
  0.15100000   1.70626504
  0.15100000   1.71726588
  0.15100000   1.72700534
  0.15100000   1.73557611
  0.15100000   1.74307655
  0.15100000   1.74960712
  0.15100000   1.75526726
  0.15100000   1.76015294
  0.15100000   1.76435481
  0.15100000   1.76795703
  0.15100000   1.77103652
  0.15100000   1.77366271
  0.15100000   1.77589758
  0.15100000   1.77779597
  0.15100000   1.77940599
  0.15100000   1.78076961
  0.15100000   1.78192320
  0.15100000   1.78289813
  0.15100000   1.78372138
  0.15120000   1.66218974
  0.15120000   1.67870331
  0.15120000   1.69364815
  0.15120000   1.70706823
  0.15120000   1.71902923
  0.15120000   1.72961442
  0.15120000   1.73892011
  0.15120000   1.74705098
  0.15120000   1.75411570
  0.15120000   1.76022311
  0.15120000   1.76547909
  0.15120000   1.76998422
  0.15120000   1.77383216
  0.15120000   1.77710864
  0.15120000   1.77989107
  0.15120000   1.78224846
  0.15120000   1.78424177
  0.15120000   1.78592434
  0.15120000   1.78734253
  0.15120000   1.78853641
  0.15120000   1.78954037
  0.15120000   1.79038387
  0.15120000   1.79109200
  0.15140000   1.67587907
  0.15140000   1.69214158
  0.15140000   1.70676628
  0.15140000   1.71981177
  0.15140000   1.73135884
  0.15140000   1.74150549
  0.15140000   1.75036158
  0.15140000   1.75804363
  0.15140000   1.76467009
  0.15140000   1.77035743
  0.15140000   1.77521709
  0.15140000   1.77935333
  0.15140000   1.78286186
  0.15140000   1.78582914
  0.15140000   1.78833230
  0.15140000   1.79043930
  0.15140000   1.79220954
  0.15140000   1.79369448
  0.15140000   1.79493842
  0.15140000   1.79597927
  0.15140000   1.79684934
  0.15140000   1.79757606
  0.15140000   1.79818263
  0.15160000   1.68927063
  0.15160000   1.70523923
  0.15160000   1.71950532
  0.15160000   1.73214353
  0.15160000   1.74325076
  0.15160000   1.75294020
  0.15160000   1.76133528
  0.15160000   1.76856392
  0.15160000   1.77475366
  0.15160000   1.78002768
  0.15160000   1.78450199
  0.15160000   1.78828352
  0.15160000   1.79146907
  0.15160000   1.79414503
  0.15160000   1.79638751
  0.15160000   1.79826289
  0.15160000   1.79982852
  0.15160000   1.80113365
  0.15160000   1.80222026
  0.15160000   1.80312400
  0.15160000   1.80387497
  0.15160000   1.80449853
  0.15160000   1.80501597
  0.15180000   1.70235167
  0.15180000   1.71798534
  0.15180000   1.73185707
  0.15180000   1.74405880
  0.15180000   1.75470429
  0.15180000   1.76392219
  0.15180000   1.77184919
  0.15180000   1.77862402
  0.15180000   1.78438234
  0.15180000   1.78925306
  0.15180000   1.79335564
  0.15180000   1.79679865
  0.15180000   1.79967911
  0.15180000   1.80208251
  0.15180000   1.80408332
  0.15180000   1.80574580
  0.15180000   1.80712493
  0.15180000   1.80826745
  0.15180000   1.80921287
  0.15180000   1.80999445
  0.15180000   1.81064006
  0.15180000   1.81117299
  0.15180000   1.81161265
  0.15200000   1.71511057
  0.15200000   1.73037053
  0.15200000   1.74381522
  0.15200000   1.75555503
  0.15200000   1.76572110
  0.15200000   1.77445745
  0.15200000   1.78191356
  0.15200000   1.78823805
  0.15200000   1.79357371
  0.15200000   1.79805394
  0.15200000   1.80180060
  0.15200000   1.80492287
  0.15200000   1.80751710
  0.15200000   1.80966716
  0.15200000   1.81144534
  0.15200000   1.81291334
  0.15200000   1.81412347
  0.15200000   1.81511977
  0.15200000   1.81593919
  0.15200000   1.81661252
  0.15200000   1.81716542
  0.15200000   1.81761913
  0.15200000   1.81799126
  0.15220000   1.72753698
  0.15220000   1.74238705
  0.15220000   1.75537546
  0.15220000   1.76663190
  0.15220000   1.77630512
  0.15220000   1.78455421
  0.15220000   1.79154064
  0.15220000   1.79742187
  0.15220000   1.80234659
  0.15220000   1.80645154
  0.15220000   1.80985980
  0.15220000   1.81268022
  0.15220000   1.81500763
  0.15220000   1.81692370
  0.15220000   1.81849800
  0.15220000   1.81978938
  0.15220000   1.82084722
  0.15220000   1.82171277
  0.15220000   1.82242031
  0.15220000   1.82299822
  0.15220000   1.82346993
  0.15220000   1.82385476
  0.15220000   1.82416854
  0.15240000   1.73962187
  0.15240000   1.75402888
  0.15240000   1.76653547
  0.15240000   1.77729121
  0.15240000   1.78646246
  0.15240000   1.79422270
  0.15240000   1.80074441
  0.15240000   1.80619267
  0.15240000   1.81072076
  0.15240000   1.81446752
  0.15240000   1.81755619
  0.15240000   1.82009433
  0.15240000   1.82217457
  0.15240000   1.82387576
  0.15240000   1.82526442
  0.15240000   1.82639626
  0.15240000   1.82731760
  0.15240000   1.82806681
  0.15240000   1.82867552
  0.15240000   1.82916972
  0.15240000   1.82957070
  0.15240000   1.82989589
  0.15240000   1.83015948
  0.15260000   1.75135772
  0.15260000   1.76529180
  0.15260000   1.77729492
  0.15260000   1.78753688
  0.15260000   1.79620121
  0.15260000   1.80347495
  0.15260000   1.80954033
  0.15260000   1.81456871
  0.15260000   1.81871661
  0.15260000   1.82212375
  0.15260000   1.82491246
  0.15260000   1.82718822
  0.15260000   1.82904078
  0.15260000   1.83054575
  0.15260000   1.83176628
  0.15260000   1.83275475
  0.15260000   1.83355435
  0.15260000   1.83420056
  0.15260000   1.83472239
  0.15260000   1.83514349
  0.15260000   1.83548312
  0.15260000   1.83575691
  0.15260000   1.83597753
  0.15280000   1.76273853
  0.15280000   1.77617339
  0.15280000   1.78765547
  0.15280000   1.79737476
  0.15280000   1.80553129
  0.15280000   1.81232451
  0.15280000   1.81794502
  0.15280000   1.82256897
  0.15280000   1.82635481
  0.15280000   1.82944192
  0.15280000   1.83195080
  0.15280000   1.83398405
  0.15280000   1.83562804
  0.15280000   1.83695477
  0.15280000   1.83802379
  0.15280000   1.83888406
  0.15280000   1.83957561
  0.15280000   1.84013104
  0.15280000   1.84057682
  0.15280000   1.84093439
  0.15280000   1.84122104
  0.15280000   1.84145073
  0.15280000   1.84163471
  0.15300000   1.77375987
  0.15300000   1.78667305
  0.15300000   1.79762067
  0.15300000   1.80681255
  0.15300000   1.81446426
  0.15300000   1.82078625
  0.15300000   1.82597598
  0.15300000   1.83021292
  0.15300000   1.83365607
  0.15300000   1.83644340
  0.15300000   1.83869267
  0.15300000   1.84050298
  0.15300000   1.84195689
  0.15300000   1.84312251
  0.15300000   1.84405566
  0.15300000   1.84480182
  0.15300000   1.84539790
  0.15300000   1.84587369
  0.15300000   1.84625321
  0.15300000   1.84655577
  0.15300000   1.84679686
  0.15300000   1.84698888
  0.15300000   1.84714176
  0.15320000   1.78441900
  0.15320000   1.79679198
  0.15320000   1.80719587
  0.15320000   1.81585962
  0.15320000   1.82301304
  0.15320000   1.82887604
  0.15320000   1.83365133
  0.15320000   1.83752018
  0.15320000   1.84064087
  0.15320000   1.84314894
  0.15320000   1.84515864
  0.15320000   1.84676507
  0.15320000   1.84804659
  0.15320000   1.84906727
  0.15320000   1.84987913
  0.15320000   1.85052419
  0.15320000   1.85103627
  0.15320000   1.85144248
  0.15320000   1.85176451
  0.15320000   1.85201966
  0.15320000   1.85222173
  0.15320000   1.85238169
  0.15320000   1.85250826
  0.15340000   1.79471478
  0.15340000   1.80653313
  0.15340000   1.81638813
  0.15340000   1.82452681
  0.15340000   1.83119171
  0.15340000   1.83661053
  0.15340000   1.84098951
  0.15340000   1.84451031
  0.15340000   1.84732927
  0.15340000   1.84957857
  0.15340000   1.85136832
  0.15340000   1.85278917
  0.15340000   1.85391509
  0.15340000   1.85480597
  0.15340000   1.85551003
  0.15340000   1.85606588
  0.15340000   1.85650437
  0.15340000   1.85685004
  0.15340000   1.85712237
  0.15340000   1.85733682
  0.15340000   1.85750560
  0.15340000   1.85763838
  0.15340000   1.85774280
  0.15360000   1.80464774
  0.15360000   1.81590111
  0.15360000   1.82520603
  0.15360000   1.83282623
  0.15360000   1.83901530
  0.15360000   1.84400686
  0.15360000   1.84800911
  0.15360000   1.85120261
  0.15360000   1.85374071
  0.15360000   1.85575143
  0.15360000   1.85734019
  0.15360000   1.85859292
  0.15360000   1.85957901
  0.15360000   1.86035415
  0.15360000   1.86096278
  0.15360000   1.86144025
  0.15360000   1.86181452
  0.15360000   1.86210772
  0.15360000   1.86233727
  0.15360000   1.86251690
  0.15360000   1.86265740
  0.15360000   1.86276723
  0.15360000   1.86285306
  0.15380000   1.81421999
  0.15380000   1.82490210
  0.15380000   1.83365953
  0.15380000   1.84077109
  0.15380000   1.84649950
  0.15380000   1.85108250
  0.15380000   1.85472856
  0.15380000   1.85761590
  0.15380000   1.85989388
  0.15380000   1.86168567
  0.15380000   1.86309164
  0.15380000   1.86419272
  0.15380000   1.86505367
  0.15380000   1.86572602
  0.15380000   1.86625054
  0.15380000   1.86665939
  0.15380000   1.86697784
  0.15380000   1.86722573
  0.15380000   1.86741859
  0.15380000   1.86756856
  0.15380000   1.86768511
  0.15380000   1.86777564
  0.15380000   1.86784592
  0.15400000   1.82343520
  0.15400000   1.83354373
  0.15400000   1.84175981
  0.15400000   1.84837545
  0.15400000   1.85366049
  0.15400000   1.85785496
  0.15400000   1.86116605
  0.15400000   1.86376842
  0.15400000   1.86580661
  0.15400000   1.86739844
  0.15400000   1.86863886
  0.15400000   1.86960372
  0.15400000   1.87035315
  0.15400000   1.87093457
  0.15400000   1.87138522
  0.15400000   1.87173424
  0.15400000   1.87200435
  0.15400000   1.87221327
  0.15400000   1.87237477
  0.15400000   1.87249955
  0.15400000   1.87259589
  0.15400000   1.87267025
  0.15400000   1.87272759
  0.15420000   1.83229848
  0.15420000   1.84183492
  0.15420000   1.84951904
  0.15420000   1.85565400
  0.15420000   1.86051470
  0.15420000   1.86434163
  0.15420000   1.86733926
  0.15420000   1.86967766
  0.15420000   1.87149582
  0.15420000   1.87290577
  0.15420000   1.87399690
  0.15420000   1.87483989
  0.15420000   1.87549031
  0.15420000   1.87599160
  0.15420000   1.87637762
  0.15420000   1.87667465
  0.15420000   1.87690304
  0.15420000   1.87707856
  0.15420000   1.87721336
  0.15420000   1.87731683
  0.15420000   1.87739620
  0.15420000   1.87745704
  0.15420000   1.87750364
  0.15440000   1.84081634
  0.15440000   1.84978576
  0.15440000   1.85695025
  0.15440000   1.86262190
  0.15440000   1.86707863
  0.15440000   1.87055961
  0.15440000   1.87326532
  0.15440000   1.87536030
  0.15440000   1.87697741
  0.15440000   1.87822264
  0.15440000   1.87917965
  0.15440000   1.87991403
  0.15440000   1.88047687
  0.15440000   1.88090781
  0.15440000   1.88123749
  0.15440000   1.88148950
  0.15440000   1.88168202
  0.15440000   1.88182900
  0.15440000   1.88194115
  0.15440000   1.88202665
  0.15440000   1.88209180
  0.15440000   1.88214139
  0.15440000   1.88217911
  0.15460000   1.84899650
  0.15460000   1.85740730
  0.15460000   1.86406709
  0.15460000   1.86929458
  0.15460000   1.87336865
  0.15460000   1.87652559
  0.15460000   1.87896066
  0.15460000   1.88083212
  0.15460000   1.88226631
  0.15460000   1.88336292
  0.15460000   1.88419991
  0.15460000   1.88483785
  0.15460000   1.88532351
  0.15460000   1.88569289
  0.15460000   1.88597361
  0.15460000   1.88618679
  0.15460000   1.88634857
  0.15460000   1.88647126
  0.15460000   1.88656424
  0.15460000   1.88663465
  0.15460000   1.88668793
  0.15460000   1.88672820
  0.15460000   1.88675859
  0.15480000   1.85684781
  0.15480000   1.86471144
  0.15480000   1.87088367
  0.15480000   1.87568754
  0.15480000   1.87940090
  0.15480000   1.88225568
  0.15480000   1.88444093
  0.15480000   1.88610801
  0.15480000   1.88737640
  0.15480000   1.88833943
  0.15480000   1.88906941
  0.15480000   1.88962202
  0.15480000   1.89003989
  0.15480000   1.89035559
  0.15480000   1.89059392
  0.15480000   1.89077370
  0.15480000   1.89090922
  0.15480000   1.89101130
  0.15480000   1.89108813
  0.15480000   1.89114591
  0.15480000   1.89118931
  0.15480000   1.89122187
  0.15480000   1.89124625
  0.15500000   1.86438012
  0.15500000   1.87171071
  0.15500000   1.87741440
  0.15500000   1.88181619
  0.15500000   1.88519111
  0.15500000   1.88776537
  0.15500000   1.88972097
  0.15500000   1.89120188
  0.15500000   1.89232056
  0.15500000   1.89316397
  0.15500000   1.89379888
  0.15500000   1.89427623
  0.15500000   1.89463476
  0.15500000   1.89490381
  0.15500000   1.89510555
  0.15500000   1.89525670
  0.15500000   1.89536987
  0.15500000   1.89545452
  0.15500000   1.89551779
  0.15500000   1.89556501
  0.15500000   1.89560023
  0.15500000   1.89562644
  0.15500000   1.89564590
  0.15520000   1.87160409
  0.15520000   1.87841816
  0.15520000   1.88367379
  0.15520000   1.88769574
  0.15520000   1.89075450
  0.15520000   1.89306941
  0.15520000   1.89481473
  0.15520000   1.89612672
  0.15520000   1.89711070
  0.15520000   1.89784736
  0.15520000   1.89839807
  0.15520000   1.89880929
  0.15520000   1.89911604
  0.15520000   1.89934468
  0.15520000   1.89951494
  0.15520000   1.89964164
  0.15520000   1.89973583
  0.15520000   1.89980579
  0.15520000   1.89985769
  0.15520000   1.89989615
  0.15520000   1.89992459
  0.15520000   1.89994559
  0.15520000   1.89996105
  0.15540000   1.87853106
  0.15540000   1.88484713
  0.15540000   1.88967633
  0.15540000   1.89334106
  0.15540000   1.89610572
  0.15540000   1.89818181
  0.15540000   1.89973531
  0.15540000   1.90089456
  0.15540000   1.90175778
  0.15540000   1.90239949
  0.15540000   1.90287589
  0.15540000   1.90322916
  0.15540000   1.90349089
  0.15540000   1.90368461
  0.15540000   1.90382788
  0.15540000   1.90393375
  0.15540000   1.90401189
  0.15540000   1.90406950
  0.15540000   1.90411192
  0.15540000   1.90414310
  0.15540000   1.90416598
  0.15540000   1.90418271
  0.15540000   1.90419491
  0.15560000   1.88517292
  0.15560000   1.89101117
  0.15560000   1.89543638
  0.15560000   1.89876657
  0.15560000   1.90125875
  0.15560000   1.90311577
  0.15560000   1.90449492
  0.15560000   1.90551656
  0.15560000   1.90627186
  0.15560000   1.90682938
  0.15560000   1.90724040
  0.15560000   1.90754307
  0.15560000   1.90776575
  0.15560000   1.90792942
  0.15560000   1.90804961
  0.15560000   1.90813778
  0.15560000   1.90820239
  0.15560000   1.90824966
  0.15560000   1.90828419
  0.15560000   1.90830936
  0.15560000   1.90832766
  0.15560000   1.90834091
  0.15560000   1.90835047
  0.15580000   1.89154194
  0.15580000   1.89692385
  0.15580000   1.90096798
  0.15580000   1.90398619
  0.15580000   1.90622688
  0.15580000   1.90788366
  0.15580000   1.90910489
  0.15580000   1.91000295
  0.15580000   1.91066213
  0.15580000   1.91114525
  0.15580000   1.91149891
  0.15580000   1.91175753
  0.15580000   1.91194645
  0.15580000   1.91208432
  0.15580000   1.91218484
  0.15580000   1.91225803
  0.15580000   1.91231126
  0.15580000   1.91234990
  0.15580000   1.91237788
  0.15580000   1.91239810
  0.15580000   1.91241266
  0.15580000   1.91242308
  0.15580000   1.91243051
  0.15600000   1.89765066
  0.15600000   1.90259868
  0.15600000   1.90628484
  0.15600000   1.90901321
  0.15600000   1.91102267
  0.15600000   1.91249705
  0.15600000   1.91357574
  0.15600000   1.91436317
  0.15600000   1.91493699
  0.15600000   1.91535456
  0.15600000   1.91565806
  0.15600000   1.91587842
  0.15600000   1.91603825
  0.15600000   1.91615405
  0.15600000   1.91623785
  0.15600000   1.91629840
  0.15600000   1.91634208
  0.15600000   1.91637353
  0.15600000   1.91639611
  0.15600000   1.91641226
  0.15600000   1.91642376
  0.15600000   1.91643190
  0.15600000   1.91643762
  0.15620000   1.90351171
  0.15620000   1.90804896
  0.15620000   1.91140020
  0.15620000   1.91386032
  0.15620000   1.91565790
  0.15620000   1.91696672
  0.15620000   1.91791713
  0.15620000   1.91860584
  0.15620000   1.91910410
  0.15620000   1.91946408
  0.15620000   1.91972385
  0.15620000   1.91991109
  0.15620000   1.92004592
  0.15620000   1.92014287
  0.15620000   1.92021250
  0.15620000   1.92026242
  0.15620000   1.92029813
  0.15620000   1.92032361
  0.15620000   1.92034173
  0.15620000   1.92035455
  0.15620000   1.92036357
  0.15620000   1.92036987
  0.15620000   1.92037421
  0.15640000   1.90913775
  0.15640000   1.91328768
  0.15640000   1.91632677
  0.15640000   1.91853953
  0.15640000   1.92014362
  0.15640000   1.92130264
  0.15640000   1.92213798
  0.15640000   1.92273886
  0.15640000   1.92317041
  0.15640000   1.92347994
  0.15640000   1.92370168
  0.15640000   1.92386035
  0.15640000   1.92397374
  0.15640000   1.92405466
  0.15640000   1.92411232
  0.15640000   1.92415331
  0.15640000   1.92418238
  0.15640000   1.92420293
  0.15640000   1.92421738
  0.15640000   1.92422749
  0.15640000   1.92423450
  0.15640000   1.92423931
  0.15640000   1.92424255
  0.15660000   1.91454133
  0.15660000   1.91832750
  0.15660000   1.92107672
  0.15660000   1.92306215
  0.15660000   1.92449013
  0.15660000   1.92551402
  0.15660000   1.92624645
  0.15660000   1.92676941
  0.15660000   1.92714225
  0.15660000   1.92740771
  0.15660000   1.92759648
  0.15660000   1.92773054
  0.15660000   1.92782562
  0.15660000   1.92789294
  0.15660000   1.92794051
  0.15660000   1.92797404
  0.15660000   1.92799759
  0.15660000   1.92801407
  0.15660000   1.92802552
  0.15660000   1.92803342
  0.15660000   1.92803881
  0.15660000   1.92804243
  0.15660000   1.92804480
  0.15680000   1.91973478
  0.15680000   1.92318060
  0.15680000   1.92566160
  0.15680000   1.92743880
  0.15680000   1.92870699
  0.15680000   1.92960936
  0.15680000   1.93025001
  0.15680000   1.93070404
  0.15680000   1.93102535
  0.15680000   1.93125242
  0.15680000   1.93141268
  0.15680000   1.93152563
  0.15680000   1.93160510
  0.15680000   1.93166091
  0.15680000   1.93170001
  0.15680000   1.93172731
  0.15680000   1.93174629
  0.15680000   1.93175942
  0.15680000   1.93176842
  0.15680000   1.93177453
  0.15680000   1.93177862
  0.15680000   1.93178128
  0.15680000   1.93178296
  0.15700000   1.92473017
  0.15700000   1.92785869
  0.15700000   1.93009233
  0.15700000   1.93167941
  0.15700000   1.93280307
  0.15700000   1.93359646
  0.15700000   1.93415550
  0.15700000   1.93454873
  0.15700000   1.93482492
  0.15700000   1.93501864
  0.15700000   1.93515431
  0.15700000   1.93524919
  0.15700000   1.93531540
  0.15700000   1.93536150
  0.15700000   1.93539350
  0.15700000   1.93541562
  0.15700000   1.93543083
  0.15700000   1.93544121
  0.15700000   1.93544822
  0.15700000   1.93545289
  0.15700000   1.93545592
  0.15700000   1.93545783
  0.15700000   1.93545897
  0.15720000   1.92953920
  0.15720000   1.93237293
  0.15720000   1.93437920
  0.15720000   1.93579323
  0.15720000   1.93678652
  0.15720000   1.93748248
  0.15720000   1.93796913
  0.15720000   1.93830887
  0.15720000   1.93854568
  0.15720000   1.93871050
  0.15720000   1.93882503
  0.15720000   1.93890447
  0.15720000   1.93895944
  0.15720000   1.93899737
  0.15720000   1.93902344
  0.15720000   1.93904127
  0.15720000   1.93905337
  0.15720000   1.93906151
  0.15720000   1.93906691
  0.15720000   1.93907041
  0.15720000   1.93907261
  0.15720000   1.93907392
  0.15720000   1.93907462
  0.15740000   1.93417317
  0.15740000   1.93673395
  0.15740000   1.93853186
  0.15740000   1.93978885
  0.15740000   1.94066488
  0.15740000   1.94127395
  0.15740000   1.94169659
  0.15740000   1.94198938
  0.15740000   1.94219190
  0.15740000   1.94233175
  0.15740000   1.94242815
  0.15740000   1.94249445
  0.15740000   1.94253992
  0.15740000   1.94257100
  0.15740000   1.94259213
  0.15740000   1.94260641
  0.15740000   1.94261596
  0.15740000   1.94262227
  0.15740000   1.94262636
  0.15740000   1.94262893
  0.15740000   1.94263046
  0.15740000   1.94263130
  0.15740000   1.94263167
  0.15760000   1.93864290
  0.15760000   1.94095177
  0.15760000   1.94255934
  0.15760000   1.94367420
  0.15760000   1.94444507
  0.15760000   1.94497686
  0.15760000   1.94534303
  0.15760000   1.94559474
  0.15760000   1.94576747
  0.15760000   1.94588580
  0.15760000   1.94596668
  0.15760000   1.94602182
  0.15760000   1.94605929
  0.15760000   1.94608463
  0.15760000   1.94610167
  0.15760000   1.94611302
  0.15760000   1.94612049
  0.15760000   1.94612532
  0.15760000   1.94612835
  0.15760000   1.94613017
  0.15760000   1.94613118
  0.15760000   1.94613164
  0.15760000   1.94613175
  0.15780000   1.94295876
  0.15780000   1.94503583
  0.15780000   1.94647001
  0.15780000   1.94745662
  0.15780000   1.94813341
  0.15780000   1.94859666
  0.15780000   1.94891315
  0.15780000   1.94912899
  0.15780000   1.94927592
  0.15780000   1.94937574
  0.15780000   1.94944339
  0.15780000   1.94948908
  0.15780000   1.94951982
  0.15780000   1.94954038
  0.15780000   1.94955401
  0.15780000   1.94956296
  0.15780000   1.94956873
  0.15780000   1.94957236
  0.15780000   1.94957455
  0.15780000   1.94957578
  0.15780000   1.94957637
  0.15780000   1.94957654
  0.15780000   1.94957644
  0.15800000   1.94713056
  0.15800000   1.94899499
  0.15800000   1.95027168
  0.15800000   1.95114286
  0.15800000   1.95173572
  0.15800000   1.95213833
  0.15800000   1.95241120
  0.15800000   1.95259581
  0.15800000   1.95272045
  0.15800000   1.95280440
  0.15800000   1.95286078
  0.15800000   1.95289850
  0.15800000   1.95292359
  0.15800000   1.95294017
  0.15800000   1.95295101
  0.15800000   1.95295798
  0.15800000   1.95296237
  0.15800000   1.95296503
  0.15800000   1.95296655
  0.15800000   1.95296730
  0.15800000   1.95296757
  0.15800000   1.95296751
  0.15800000   1.95296726
  0.15820000   1.95116762
  0.15820000   1.95283754
  0.15820000   1.95397157
  0.15820000   1.95473912
  0.15820000   1.95525730
  0.15820000   1.95560638
  0.15820000   1.95584107
  0.15820000   1.95599855
  0.15820000   1.95610398
  0.15820000   1.95617436
  0.15820000   1.95622118
  0.15820000   1.95625217
  0.15820000   1.95627255
  0.15820000   1.95628582
  0.15820000   1.95629435
  0.15820000   1.95629972
  0.15820000   1.95630299
  0.15820000   1.95630487
  0.15820000   1.95630585
  0.15820000   1.95630623
  0.15820000   1.95630624
  0.15820000   1.95630601
  0.15820000   1.95630563
  0.15840000   1.95507870
  0.15840000   1.95657120
  0.15840000   1.95757633
  0.15840000   1.95825111
  0.15840000   1.95870298
  0.15840000   1.95900493
  0.15840000   1.95920628
  0.15840000   1.95934025
  0.15840000   1.95942916
  0.15840000   1.95948796
  0.15840000   1.95952669
  0.15840000   1.95955203
  0.15840000   1.95956848
  0.15840000   1.95957902
  0.15840000   1.95958566
  0.15840000   1.95958972
  0.15840000   1.95959208
  0.15840000   1.95959334
  0.15840000   1.95959389
  0.15840000   1.95959398
  0.15840000   1.95959379
  0.15840000   1.95959342
  0.15840000   1.95959296
  0.15860000   1.95887203
  0.15860000   1.96020313
  0.15860000   1.96109210
  0.15860000   1.96168402
  0.15860000   1.96207717
  0.15860000   1.96233773
  0.15860000   1.96251004
  0.15860000   1.96262369
  0.15860000   1.96269843
  0.15860000   1.96274738
  0.15860000   1.96277927
  0.15860000   1.96279988
  0.15860000   1.96281306
  0.15860000   1.96282135
  0.15860000   1.96282644
  0.15860000   1.96282944
  0.15860000   1.96283107
  0.15860000   1.96283184
  0.15860000   1.96283205
  0.15860000   1.96283191
  0.15860000   1.96283156
  0.15860000   1.96283109
  0.15860000   1.96283056
  0.15880000   1.96255533
  0.15880000   1.96373998
  0.15880000   1.96452454
  0.15880000   1.96504263
  0.15880000   1.96538391
  0.15880000   1.96560821
  0.15880000   1.96575526
  0.15880000   1.96585139
  0.15880000   1.96591401
  0.15880000   1.96595460
  0.15880000   1.96598073
  0.15880000   1.96599739
  0.15880000   1.96600786
  0.15880000   1.96601430
  0.15880000   1.96601813
  0.15880000   1.96602026
  0.15880000   1.96602132
  0.15880000   1.96602169
  0.15880000   1.96602163
  0.15880000   1.96602131
  0.15880000   1.96602085
  0.15880000   1.96602030
  0.15880000   1.96601971
  0.15900000   1.96613578
  0.15900000   1.96718788
  0.15900000   1.96787882
  0.15900000   1.96833128
  0.15900000   1.96862685
  0.15900000   1.96881945
  0.15900000   1.96894461
  0.15900000   1.96902567
  0.15900000   1.96907795
  0.15900000   1.96911145
  0.15900000   1.96913275
  0.15900000   1.96914611
  0.15900000   1.96915435
  0.15900000   1.96915927
  0.15900000   1.96916207
  0.15900000   1.96916351
  0.15900000   1.96916410
  0.15900000   1.96916416
  0.15900000   1.96916389
  0.15900000   1.96916344
  0.15900000   1.96916288
  0.15900000   1.96916227
  0.15900000   1.96916165
  0.15920000   1.96962007
  0.15920000   1.97055251
  0.15920000   1.97115970
  0.15920000   1.97155397
  0.15920000   1.97180933
  0.15920000   1.97197428
  0.15920000   1.97208051
  0.15920000   1.97214864
  0.15920000   1.97219211
  0.15920000   1.97221964
  0.15920000   1.97223688
  0.15920000   1.97224751
  0.15920000   1.97225390
  0.15920000   1.97225758
  0.15920000   1.97225955
  0.15920000   1.97226044
  0.15920000   1.97226066
  0.15920000   1.97226047
  0.15920000   1.97226004
  0.15920000   1.97225948
  0.15920000   1.97225886
  0.15920000   1.97225820
  0.15920000   1.97225755
  0.15940000   1.97301440
  0.15940000   1.97383908
  0.15940000   1.97437152
  0.15940000   1.97471431
  0.15940000   1.97493440
  0.15940000   1.97507530
  0.15940000   1.97516518
  0.15940000   1.97522225
  0.15940000   1.97525824
  0.15940000   1.97528073
  0.15940000   1.97529459
  0.15940000   1.97530296
  0.15940000   1.97530783
  0.15940000   1.97531050
  0.15940000   1.97531180
  0.15940000   1.97531224
  0.15940000   1.97531216
  0.15940000   1.97531178
  0.15940000   1.97531123
  0.15940000   1.97531059
  0.15940000   1.97530991
  0.15940000   1.97530923
  0.15940000   1.97530856
  0.15960000   1.97632453
  0.15960000   1.97705238
  0.15960000   1.97751827
  0.15960000   1.97781561
  0.15960000   1.97800484
  0.15960000   1.97812486
  0.15960000   1.97820067
  0.15960000   1.97824828
  0.15960000   1.97827794
  0.15960000   1.97829620
  0.15960000   1.97830724
  0.15960000   1.97831373
  0.15960000   1.97831737
  0.15960000   1.97831922
  0.15960000   1.97831997
  0.15960000   1.97832006
  0.15960000   1.97831976
  0.15960000   1.97831923
  0.15960000   1.97831858
  0.15960000   1.97831788
  0.15960000   1.97831716
  0.15960000   1.97831645
  0.15960000   1.97831576
  0.15980000   1.97955577
  0.15980000   1.98019682
  0.15980000   1.98060357
  0.15980000   1.98086089
  0.15980000   1.98102316
  0.15980000   1.98112510
  0.15980000   1.98118882
  0.15980000   1.98122838
  0.15980000   1.98125269
  0.15980000   1.98126741
  0.15980000   1.98127611
  0.15980000   1.98128106
  0.15980000   1.98128368
  0.15980000   1.98128487
  0.15980000   1.98128519
  0.15980000   1.98128500
  0.15980000   1.98128452
  0.15980000   1.98128387
  0.15980000   1.98128315
  0.15980000   1.98128240
  0.15980000   1.98128166
  0.15980000   1.98128093
  0.15980000   1.98128023
  0.16000000   1.98271301
  0.16000000   1.98327642
  0.16000000   1.98363076
  0.16000000   1.98385291
  0.16000000   1.98399169
  0.16000000   1.98407801
  0.16000000   1.98413138
  0.16000000   1.98416409
  0.16000000   1.98418390
  0.16000000   1.98419565
  0.16000000   1.98420241
  0.16000000   1.98420610
  0.16000000   1.98420789
  0.16000000   1.98420855
  0.16000000   1.98420852
  0.16000000   1.98420811
  0.16000000   1.98420748
  0.16000000   1.98420675
  0.16000000   1.98420597
  0.16000000   1.98420519
  0.16000000   1.98420443
  0.16000000   1.98420369
  0.16000000   1.98420299
  0.16020000   1.98580075
  0.16020000   1.98629489
  0.16020000   1.98660287
  0.16020000   1.98679418
  0.16020000   1.98691254
  0.16020000   1.98698539
  0.16020000   1.98702990
  0.16020000   1.98705682
  0.16020000   1.98707284
  0.16020000   1.98708213
  0.16020000   1.98708729
  0.16020000   1.98708993
  0.16020000   1.98709106
  0.16020000   1.98709128
  0.16020000   1.98709099
  0.16020000   1.98709040
  0.16020000   1.98708967
  0.16020000   1.98708887
  0.16020000   1.98708805
  0.16020000   1.98708724
  0.16020000   1.98708646
  0.16020000   1.98708572
  0.16020000   1.98708501
  0.16040000   1.98882315
  0.16040000   1.98925559
  0.16040000   1.98952267
  0.16040000   1.98968700
  0.16040000   1.98978765
  0.16040000   1.98984891
  0.16040000   1.98988588
  0.16040000   1.98990789
  0.16040000   1.98992073
  0.16040000   1.98992797
  0.16040000   1.98993181
  0.16040000   1.98993361
  0.16040000   1.98993420
  0.16040000   1.98993408
  0.16040000   1.98993357
  0.16040000   1.98993285
  0.16040000   1.98993203
  0.16040000   1.98993118
  0.16040000   1.98993033
  0.16040000   1.98992951
  0.16040000   1.98992872
  0.16040000   1.98992797
  0.16040000   1.98992726
  0.16060000   1.99178401
  0.16060000   1.99216164
  0.16060000   1.99239269
  0.16060000   1.99253346
  0.16060000   1.99261878
  0.16060000   1.99267011
  0.16060000   1.99270065
  0.16060000   1.99271853
  0.16060000   1.99272871
  0.16060000   1.99273425
  0.16060000   1.99273701
  0.16060000   1.99273813
  0.16060000   1.99273828
  0.16060000   1.99273789
  0.16060000   1.99273721
  0.16060000   1.99273639
  0.16060000   1.99273550
  0.16060000   1.99273461
  0.16060000   1.99273374
  0.16060000   1.99273291
  0.16060000   1.99273211
  0.16060000   1.99273136
  0.16060000   1.99273065
  0.16080000   1.99468681
  0.16080000   1.99501585
  0.16080000   1.99521524
  0.16080000   1.99533550
  0.16080000   1.99540758
  0.16080000   1.99545040
  0.16080000   1.99547549
  0.16080000   1.99548989
  0.16080000   1.99549786
  0.16080000   1.99550200
  0.16080000   1.99550388
  0.16080000   1.99550443
  0.16080000   1.99550424
  0.16080000   1.99550364
  0.16080000   1.99550282
  0.16080000   1.99550192
  0.16080000   1.99550099
  0.16080000   1.99550007
  0.16080000   1.99549919
  0.16080000   1.99549834
  0.16080000   1.99549754
  0.16080000   1.99549679
  0.16080000   1.99549608
  0.16100000   1.99753477
  0.16100000   1.99782081
  0.16100000   1.99799244
  0.16100000   1.99809487
  0.16100000   1.99815555
  0.16100000   1.99819110
  0.16100000   1.99821158
  0.16100000   1.99822306
  0.16100000   1.99822919
  0.16100000   1.99823218
  0.16100000   1.99823333
  0.16100000   1.99823344
  0.16100000   1.99823297
  0.16100000   1.99823220
  0.16100000   1.99823128
  0.16100000   1.99823032
  0.16100000   1.99822935
  0.16100000   1.99822841
  0.16100000   1.99822752
  0.16100000   1.99822667
  0.16100000   1.99822587
  0.16100000   1.99822512
  0.16100000   1.99822441
  0.16120000   2.00033080
  0.16120000   2.00057888
  0.16120000   2.00072623
  0.16120000   2.00081320
  0.16120000   2.00086407
  0.16120000   2.00089343
  0.16120000   2.00091002
  0.16120000   2.00091906
  0.16120000   2.00092367
  0.16120000   2.00092570
  0.16120000   2.00092627
  0.16120000   2.00092602
  0.16120000   2.00092533
  0.16120000   2.00092443
  0.16120000   2.00092343
  0.16120000   2.00092242
  0.16120000   2.00092143
  0.16120000   2.00092048
  0.16120000   2.00091958
  0.16120000   2.00091873
  0.16120000   2.00091793
  0.16120000   2.00091718
  0.16120000   2.00091647
  0.16140000   2.00307760
  0.16140000   2.00329224
  0.16140000   2.00341838
  0.16140000   2.00349197
  0.16140000   2.00353444
  0.16140000   2.00355854
  0.16140000   2.00357184
  0.16140000   2.00357884
  0.16140000   2.00358220
  0.16140000   2.00358346
  0.16140000   2.00358355
  0.16140000   2.00358301
  0.16140000   2.00358215
  0.16140000   2.00358114
  0.16140000   2.00358009
  0.16140000   2.00357904
  0.16140000   2.00357803
  0.16140000   2.00357708
  0.16140000   2.00357617
  0.16140000   2.00357532
  0.16140000   2.00357452
  0.16140000   2.00357377
  0.16140000   2.00357307
  0.16160000   2.00577762
  0.16160000   2.00596285
  0.16160000   2.00607052
  0.16160000   2.00613256
  0.16160000   2.00616783
  0.16160000   2.00618748
  0.16160000   2.00619803
  0.16160000   2.00620333
  0.16160000   2.00620565
  0.16160000   2.00620628
  0.16160000   2.00620599
  0.16160000   2.00620523
  0.16160000   2.00620423
  0.16160000   2.00620314
  0.16160000   2.00620204
  0.16160000   2.00620097
  0.16160000   2.00619995
  0.16160000   2.00619899
  0.16160000   2.00619808
  0.16160000   2.00619723
  0.16160000   2.00619643
  0.16160000   2.00619569
  0.16160000   2.00619498
  0.16180000   2.00843310
  0.16180000   2.00859254
  0.16180000   2.00868415
  0.16180000   2.00873624
  0.16180000   2.00876538
  0.16180000   2.00878125
  0.16180000   2.00878949
  0.16180000   2.00879339
  0.16180000   2.00879486
  0.16180000   2.00879498
  0.16180000   2.00879438
  0.16180000   2.00879344
  0.16180000   2.00879233
  0.16180000   2.00879119
  0.16180000   2.00879006
  0.16180000   2.00878897
  0.16180000   2.00878794
  0.16180000   2.00878697
  0.16180000   2.00878606
  0.16180000   2.00878522
  0.16180000   2.00878442
  0.16180000   2.00878368
  0.16180000   2.00878298
  0.16200000   2.01104612
  0.16200000   2.01118297
  0.16200000   2.01126065
  0.16200000   2.01130419
  0.16200000   2.01132810
  0.16200000   2.01134079
  0.16200000   2.01134710
  0.16200000   2.01134985
  0.16200000   2.01135061
  0.16200000   2.01135032
  0.16200000   2.01134948
  0.16200000   2.01134839
  0.16200000   2.01134721
  0.16200000   2.01134602
  0.16200000   2.01134486
  0.16200000   2.01134377
  0.16200000   2.01134273
  0.16200000   2.01134176
  0.16200000   2.01134086
  0.16200000   2.01134001
  0.16200000   2.01133922
  0.16200000   2.01133848
  0.16200000   2.01133778
  0.16220000   2.01361854
  0.16220000   2.01373567
  0.16220000   2.01380129
  0.16220000   2.01383750
  0.16220000   2.01385697
  0.16220000   2.01386698
  0.16220000   2.01387169
  0.16220000   2.01387348
  0.16220000   2.01387368
  0.16220000   2.01387305
  0.16220000   2.01387202
  0.16220000   2.01387082
  0.16220000   2.01386958
  0.16220000   2.01386836
  0.16220000   2.01386718
  0.16220000   2.01386608
  0.16220000   2.01386504
  0.16220000   2.01386407
  0.16220000   2.01386317
  0.16220000   2.01386233
  0.16220000   2.01386154
  0.16220000   2.01386080
  0.16220000   2.01386010
  0.16240000   2.01615211
  0.16240000   2.01625204
  0.16240000   2.01630725
  0.16240000   2.01633718
  0.16240000   2.01635289
  0.16240000   2.01636066
  0.16240000   2.01636404
  0.16240000   2.01636504
  0.16240000   2.01636478
  0.16240000   2.01636389
  0.16240000   2.01636271
  0.16240000   2.01636143
  0.16240000   2.01636014
  0.16240000   2.01635889
  0.16240000   2.01635771
  0.16240000   2.01635660
  0.16240000   2.01635556
  0.16240000   2.01635459
  0.16240000   2.01635369
  0.16240000   2.01635285
  0.16240000   2.01635207
  0.16240000   2.01635133
  0.16240000   2.01635064
  0.16260000   2.01864841
  0.16260000   2.01873338
  0.16260000   2.01877962
  0.16260000   2.01880420
  0.16260000   2.01881673
  0.16260000   2.01882262
  0.16260000   2.01882490
  0.16260000   2.01882526
  0.16260000   2.01882463
  0.16260000   2.01882353
  0.16260000   2.01882223
  0.16260000   2.01882088
  0.16260000   2.01881955
  0.16260000   2.01881829
  0.16260000   2.01881710
  0.16260000   2.01881599
  0.16260000   2.01881495
  0.16260000   2.01881399
  0.16260000   2.01881309
  0.16260000   2.01881225
  0.16260000   2.01881147
  0.16260000   2.01881074
  0.16260000   2.01881005
  0.16280000   2.02110891
  0.16280000   2.02118088
  0.16280000   2.02121941
  0.16280000   2.02123943
  0.16280000   2.02124929
  0.16280000   2.02125361
  0.16280000   2.02125499
  0.16280000   2.02125482
  0.16280000   2.02125389
  0.16280000   2.02125262
  0.16280000   2.02125123
  0.16280000   2.02124983
  0.16280000   2.02124848
  0.16280000   2.02124721
  0.16280000   2.02124602
  0.16280000   2.02124491
  0.16280000   2.02124387
  0.16280000   2.02124291
  0.16280000   2.02124202
  0.16280000   2.02124118
  0.16280000   2.02124040
  0.16280000   2.02123967
  0.16280000   2.02123898
  0.16300000   2.02353493
  0.16300000   2.02359566
  0.16300000   2.02362757
  0.16300000   2.02364372
  0.16300000   2.02365133
  0.16300000   2.02365435
  0.16300000   2.02365498
  0.16300000   2.02365439
  0.16300000   2.02365322
  0.16300000   2.02365182
  0.16300000   2.02365036
  0.16300000   2.02364892
  0.16300000   2.02364756
  0.16300000   2.02364628
  0.16300000   2.02364508
  0.16300000   2.02364398
  0.16300000   2.02364295
  0.16300000   2.02364199
  0.16300000   2.02364110
  0.16300000   2.02364026
  0.16300000   2.02363949
  0.16300000   2.02363876
  0.16300000   2.02363807
  0.16320000   2.02592772
  0.16320000   2.02597873
  0.16320000   2.02600498
  0.16320000   2.02601785
  0.16320000   2.02602357
  0.16320000   2.02602552
  0.16320000   2.02602553
  0.16320000   2.02602460
  0.16320000   2.02602325
  0.16320000   2.02602174
  0.16320000   2.02602023
  0.16320000   2.02601877
  0.16320000   2.02601739
  0.16320000   2.02601611
  0.16320000   2.02601492
  0.16320000   2.02601381
  0.16320000   2.02601278
  0.16320000   2.02601183
  0.16320000   2.02601094
  0.16320000   2.02601011
  0.16320000   2.02600934
  0.16320000   2.02600861
  0.16320000   2.02600793
  0.16340000   2.02828842
  0.16340000   2.02833104
  0.16340000   2.02835246
  0.16340000   2.02836257
  0.16340000   2.02836671
  0.16340000   2.02836777
  0.16340000   2.02836728
  0.16340000   2.02836608
  0.16340000   2.02836457
  0.16340000   2.02836299
  0.16340000   2.02836144
  0.16340000   2.02835996
  0.16340000   2.02835858
  0.16340000   2.02835730
  0.16340000   2.02835611
  0.16340000   2.02835500
  0.16340000   2.02835398
  0.16340000   2.02835303
  0.16340000   2.02835215
  0.16340000   2.02835132
  0.16340000   2.02835055
  0.16340000   2.02834982
  0.16340000   2.02834914
  0.16360000   2.03061808
  0.16360000   2.03065349
  0.16360000   2.03067080
  0.16360000   2.03067857
  0.16360000   2.03068140
  0.16360000   2.03068173
  0.16360000   2.03068084
  0.16360000   2.03067941
  0.16360000   2.03067779
  0.16360000   2.03067615
  0.16360000   2.03067457
  0.16360000   2.03067308
  0.16360000   2.03067170
  0.16360000   2.03067042
  0.16360000   2.03066923
  0.16360000   2.03066813
  0.16360000   2.03066711
  0.16360000   2.03066616
  0.16360000   2.03066528
  0.16360000   2.03066446
  0.16360000   2.03066369
  0.16360000   2.03066296
  0.16360000   2.03066228
  0.16380000   2.03291768
  0.16380000   2.03294690
  0.16380000   2.03296071
  0.16380000   2.03296653
  0.16380000   2.03296827
  0.16380000   2.03296799
  0.16380000   2.03296678
  0.16380000   2.03296518
  0.16380000   2.03296347
  0.16380000   2.03296179
  0.16380000   2.03296019
  0.16380000   2.03295869
  0.16380000   2.03295731
  0.16380000   2.03295603
  0.16380000   2.03295484
  0.16380000   2.03295375
  0.16380000   2.03295273
  0.16380000   2.03295179
  0.16380000   2.03295091
  0.16380000   2.03295009
  0.16380000   2.03294932
  0.16380000   2.03294860
  0.16380000   2.03294792
  0.16400000   2.03518812
  0.16400000   2.03521204
  0.16400000   2.03522290
  0.16400000   2.03522707
  0.16400000   2.03522791
  0.16400000   2.03522715
  0.16400000   2.03522567
  0.16400000   2.03522394
  0.16400000   2.03522216
  0.16400000   2.03522045
  0.16400000   2.03521883
  0.16400000   2.03521733
  0.16400000   2.03521595
  0.16400000   2.03521467
  0.16400000   2.03521350
  0.16400000   2.03521240
  0.16400000   2.03521139
  0.16400000   2.03521045
  0.16400000   2.03520958
  0.16400000   2.03520876
  0.16400000   2.03520799
  0.16400000   2.03520727
  0.16400000   2.03520659
  0.16420000   2.03743026
  0.16420000   2.03744965
  0.16420000   2.03745800
  0.16420000   2.03746081
  0.16420000   2.03746091
  0.16420000   2.03745975
  0.16420000   2.03745807
  0.16420000   2.03745622
  0.16420000   2.03745440
  0.16420000   2.03745266
  0.16420000   2.03745104
  0.16420000   2.03744954
  0.16420000   2.03744816
  0.16420000   2.03744689
  0.16420000   2.03744571
  0.16420000   2.03744462
  0.16420000   2.03744362
  0.16420000   2.03744268
  0.16420000   2.03744181
  0.16420000   2.03744099
  0.16420000   2.03744023
  0.16420000   2.03743951
  0.16420000   2.03743883
  0.16440000   2.03964487
  0.16440000   2.03966040
  0.16440000   2.03966665
  0.16440000   2.03966832
  0.16440000   2.03966781
  0.16440000   2.03966633
  0.16440000   2.03966448
  0.16440000   2.03966256
  0.16440000   2.03966069
  0.16440000   2.03965894
  0.16440000   2.03965731
  0.16440000   2.03965582
  0.16440000   2.03965444
  0.16440000   2.03965317
  0.16440000   2.03965200
  0.16440000   2.03965092
  0.16440000   2.03964992
  0.16440000   2.03964899
  0.16440000   2.03964811
  0.16440000   2.03964730
  0.16440000   2.03964654
  0.16440000   2.03964582
  0.16440000   2.03964515
  0.16460000   2.04183269
  0.16460000   2.04184494
  0.16460000   2.04184942
  0.16460000   2.04185015
  0.16460000   2.04184914
  0.16460000   2.04184740
  0.16460000   2.04184543
  0.16460000   2.04184345
  0.16460000   2.04184155
  0.16460000   2.04183979
  0.16460000   2.04183817
  0.16460000   2.04183667
  0.16460000   2.04183530
  0.16460000   2.04183404
  0.16460000   2.04183288
  0.16460000   2.04183180
  0.16460000   2.04183080
  0.16460000   2.04182987
  0.16460000   2.04182900
  0.16460000   2.04182819
  0.16460000   2.04182742
  0.16460000   2.04182671
  0.16460000   2.04182604
  0.16480000   2.04399441
  0.16480000   2.04400389
  0.16480000   2.04400689
  0.16480000   2.04400684
  0.16480000   2.04400542
  0.16480000   2.04400348
  0.16480000   2.04400141
  0.16480000   2.04399938
  0.16480000   2.04399747
  0.16480000   2.04399570
  0.16480000   2.04399408
  0.16480000   2.04399259
  0.16480000   2.04399123
  0.16480000   2.04398997
  0.16480000   2.04398881
  0.16480000   2.04398773
  0.16480000   2.04398674
  0.16480000   2.04398581
  0.16480000   2.04398494
  0.16480000   2.04398413
  0.16480000   2.04398337
  0.16480000   2.04398266
  0.16480000   2.04398199
  0.16500000   2.04613068
  0.16500000   2.04613781
  0.16500000   2.04613958
  0.16500000   2.04613889
  0.16500000   2.04613715
  0.16500000   2.04613505
  0.16500000   2.04613290
  0.16500000   2.04613083
  0.16500000   2.04612891
  0.16500000   2.04612715
  0.16500000   2.04612553
  0.16500000   2.04612404
  0.16500000   2.04612268
  0.16500000   2.04612143
  0.16500000   2.04612028
  0.16500000   2.04611921
  0.16500000   2.04611821
  0.16500000   2.04611729
  0.16500000   2.04611642
  0.16500000   2.04611562
  0.16500000   2.04611486
  0.16500000   2.04611414
  0.16500000   2.04611347
  0.16520000   2.04824212
  0.16520000   2.04824727
  0.16520000   2.04824801
  0.16520000   2.04824679
  0.16520000   2.04824479
  0.16520000   2.04824257
  0.16520000   2.04824036
  0.16520000   2.04823827
  0.16520000   2.04823635
  0.16520000   2.04823458
  0.16520000   2.04823297
  0.16520000   2.04823149
  0.16520000   2.04823014
  0.16520000   2.04822889
  0.16520000   2.04822774
  0.16520000   2.04822667
  0.16520000   2.04822568
  0.16520000   2.04822476
  0.16520000   2.04822390
  0.16520000   2.04822309
  0.16520000   2.04822233
  0.16520000   2.04822162
  0.16520000   2.04822095
  0.16540000   2.05032929
  0.16540000   2.05033278
  0.16540000   2.05033267
  0.16540000   2.05033103
  0.16540000   2.05032882
  0.16540000   2.05032650
  0.16540000   2.05032425
  0.16540000   2.05032215
  0.16540000   2.05032022
  0.16540000   2.05031846
  0.16540000   2.05031685
  0.16540000   2.05031538
  0.16540000   2.05031403
  0.16540000   2.05031279
  0.16540000   2.05031164
  0.16540000   2.05031058
  0.16540000   2.05030959
  0.16540000   2.05030867
  0.16540000   2.05030781
  0.16540000   2.05030701
  0.16540000   2.05030625
  0.16540000   2.05030554
  0.16540000   2.05030487
  0.16560000   2.05239274
  0.16560000   2.05239485
  0.16560000   2.05239404
  0.16560000   2.05239205
  0.16560000   2.05238968
  0.16560000   2.05238728
  0.16560000   2.05238500
  0.16560000   2.05238289
  0.16560000   2.05238097
  0.16560000   2.05237921
  0.16560000   2.05237761
  0.16560000   2.05237614
  0.16560000   2.05237480
  0.16560000   2.05237356
  0.16560000   2.05237242
  0.16560000   2.05237136
  0.16560000   2.05237038
  0.16560000   2.05236946
  0.16560000   2.05236860
  0.16560000   2.05236780
  0.16560000   2.05236704
  0.16560000   2.05236633
  0.16560000   2.05236567
  0.16580000   2.05443300
  0.16580000   2.05443395
  0.16580000   2.05443257
  0.16580000   2.05443030
  0.16580000   2.05442780
  0.16580000   2.05442534
  0.16580000   2.05442305
  0.16580000   2.05442094
  0.16580000   2.05441902
  0.16580000   2.05441727
  0.16580000   2.05441567
  0.16580000   2.05441421
  0.16580000   2.05441287
  0.16580000   2.05441164
  0.16580000   2.05441050
  0.16580000   2.05440944
  0.16580000   2.05440846
  0.16580000   2.05440755
  0.16580000   2.05440669
  0.16580000   2.05440589
  0.16580000   2.05440514
  0.16580000   2.05440443
  0.16580000   2.05440376
  0.16600000   2.05645056
  0.16600000   2.05645054
  0.16600000   2.05644869
  0.16600000   2.05644620
  0.16600000   2.05644360
  0.16600000   2.05644111
  0.16600000   2.05643880
  0.16600000   2.05643669
  0.16600000   2.05643478
  0.16600000   2.05643303
  0.16600000   2.05643144
  0.16600000   2.05642999
  0.16600000   2.05642866
  0.16600000   2.05642743
  0.16600000   2.05642629
  0.16600000   2.05642524
  0.16600000   2.05642426
  0.16600000   2.05642335
  0.16600000   2.05642250
  0.16600000   2.05642169
  0.16600000   2.05642094
  0.16600000   2.05642024
  0.16600000   2.05641957
  0.16620000   2.05844589
  0.16620000   2.05844507
  0.16620000   2.05844284
  0.16620000   2.05844018
  0.16620000   2.05843750
  0.16620000   2.05843498
  0.16620000   2.05843267
  0.16620000   2.05843056
  0.16620000   2.05842865
  0.16620000   2.05842692
  0.16620000   2.05842533
  0.16620000   2.05842389
  0.16620000   2.05842256
  0.16620000   2.05842134
  0.16620000   2.05842020
  0.16620000   2.05841915
  0.16620000   2.05841818
  0.16620000   2.05841727
  0.16620000   2.05841641
  0.16620000   2.05841561
  0.16620000   2.05841486
  0.16620000   2.05841416
  0.16620000   2.05841349
  0.16640000   2.06041943
  0.16640000   2.06041796
  0.16640000   2.06041542
  0.16640000   2.06041262
  0.16640000   2.06040989
  0.16640000   2.06040735
  0.16640000   2.06040504
  0.16640000   2.06040294
  0.16640000   2.06040104
  0.16640000   2.06039931
  0.16640000   2.06039773
  0.16640000   2.06039629
  0.16640000   2.06039497
  0.16640000   2.06039375
  0.16640000   2.06039262
  0.16640000   2.06039157
  0.16640000   2.06039060
  0.16640000   2.06038969
  0.16640000   2.06038884
  0.16640000   2.06038804
  0.16640000   2.06038729
  0.16640000   2.06038658
  0.16640000   2.06038592
  0.16660000   2.06237162
  0.16660000   2.06236962
  0.16660000   2.06236683
  0.16660000   2.06236393
  0.16660000   2.06236116
  0.16660000   2.06235861
  0.16660000   2.06235630
  0.16660000   2.06235420
  0.16660000   2.06235231
  0.16660000   2.06235059
  0.16660000   2.06234902
  0.16660000   2.06234759
  0.16660000   2.06234627
  0.16660000   2.06234505
  0.16660000   2.06234393
  0.16660000   2.06234288
  0.16660000   2.06234191
  0.16660000   2.06234100
  0.16660000   2.06234015
  0.16660000   2.06233936
  0.16660000   2.06233861
  0.16660000   2.06233790
  0.16660000   2.06233724
  0.16680000   2.06430288
  0.16680000   2.06430043
  0.16680000   2.06429746
  0.16680000   2.06429447
  0.16680000   2.06429168
  0.16680000   2.06428912
  0.16680000   2.06428682
  0.16680000   2.06428473
  0.16680000   2.06428285
  0.16680000   2.06428113
  0.16680000   2.06427957
  0.16680000   2.06427814
  0.16680000   2.06427683
  0.16680000   2.06427562
  0.16680000   2.06427450
  0.16680000   2.06427345
  0.16680000   2.06427248
  0.16680000   2.06427158
  0.16680000   2.06427073
  0.16680000   2.06426993
  0.16680000   2.06426918
  0.16680000   2.06426848
  0.16680000   2.06426781
  0.16700000   2.06621360
  0.16700000   2.06621080
  0.16700000   2.06620767
  0.16700000   2.06620463
  0.16700000   2.06620181
  0.16700000   2.06619926
  0.16700000   2.06619696
  0.16700000   2.06619489
  0.16700000   2.06619301
  0.16700000   2.06619130
  0.16700000   2.06618975
  0.16700000   2.06618833
  0.16700000   2.06618702
  0.16700000   2.06618581
  0.16700000   2.06618469
  0.16700000   2.06618365
  0.16700000   2.06618268
  0.16700000   2.06618178
  0.16700000   2.06618093
  0.16700000   2.06618013
  0.16700000   2.06617939
  0.16700000   2.06617868
  0.16700000   2.06617802
  0.16720000   2.06810416
  0.16720000   2.06810108
  0.16720000   2.06809783
  0.16720000   2.06809475
  0.16720000   2.06809192
  0.16720000   2.06808938
  0.16720000   2.06808708
  0.16720000   2.06808502
  0.16720000   2.06808315
  0.16720000   2.06808145
  0.16720000   2.06807990
  0.16720000   2.06807849
  0.16720000   2.06807718
  0.16720000   2.06807598
  0.16720000   2.06807486
  0.16720000   2.06807382
  0.16720000   2.06807285
  0.16720000   2.06807195
  0.16720000   2.06807111
  0.16720000   2.06807031
  0.16720000   2.06806956
  0.16720000   2.06806886
  0.16720000   2.06806820
  0.16740000   2.06997493
  0.16740000   2.06997163
  0.16740000   2.06996829
  0.16740000   2.06996518
  0.16740000   2.06996235
  0.16740000   2.06995981
  0.16740000   2.06995753
  0.16740000   2.06995547
  0.16740000   2.06995361
  0.16740000   2.06995193
  0.16740000   2.06995038
  0.16740000   2.06994897
  0.16740000   2.06994767
  0.16740000   2.06994647
  0.16740000   2.06994535
  0.16740000   2.06994432
  0.16740000   2.06994335
  0.16740000   2.06994245
  0.16740000   2.06994161
  0.16740000   2.06994081
  0.16740000   2.06994007
  0.16740000   2.06993936
  0.16740000   2.06993870
  0.16760000   2.07182628
  0.16760000   2.07182280
  0.16760000   2.07181940
  0.16760000   2.07181627
  0.16760000   2.07181344
  0.16760000   2.07181091
  0.16760000   2.07180864
  0.16760000   2.07180659
  0.16760000   2.07180474
  0.16760000   2.07180306
  0.16760000   2.07180152
  0.16760000   2.07180011
  0.16760000   2.07179882
  0.16760000   2.07179762
  0.16760000   2.07179651
  0.16760000   2.07179547
  0.16760000   2.07179451
  0.16760000   2.07179361
  0.16760000   2.07179276
  0.16760000   2.07179197
  0.16760000   2.07179123
  0.16760000   2.07179052
  0.16760000   2.07178986
  0.16780000   2.07365855
  0.16780000   2.07365492
  0.16780000   2.07365148
  0.16780000   2.07364834
  0.16780000   2.07364552
  0.16780000   2.07364300
  0.16780000   2.07364074
  0.16780000   2.07363870
  0.16780000   2.07363686
  0.16780000   2.07363518
  0.16780000   2.07363365
  0.16780000   2.07363225
  0.16780000   2.07363095
  0.16780000   2.07362976
  0.16780000   2.07362865
  0.16780000   2.07362762
  0.16780000   2.07362665
  0.16780000   2.07362575
  0.16780000   2.07362491
  0.16780000   2.07362412
  0.16780000   2.07362337
  0.16780000   2.07362267
  0.16780000   2.07362201
  0.16800000   2.07547206
  0.16800000   2.07546833
  0.16800000   2.07546486
  0.16800000   2.07546171
  0.16800000   2.07545891
  0.16800000   2.07545640
  0.16800000   2.07545415
  0.16800000   2.07545212
  0.16800000   2.07545028
  0.16800000   2.07544861
  0.16800000   2.07544709
  0.16800000   2.07544569
  0.16800000   2.07544440
  0.16800000   2.07544320
  0.16800000   2.07544210
  0.16800000   2.07544107
  0.16800000   2.07544011
  0.16800000   2.07543921
  0.16800000   2.07543837
  0.16800000   2.07543758
  0.16800000   2.07543683
  0.16800000   2.07543613
  0.16800000   2.07543546
  0.16820000   2.07726715
  0.16820000   2.07726335
  0.16820000   2.07725985
  0.16820000   2.07725671
  0.16820000   2.07725391
  0.16820000   2.07725142
  0.16820000   2.07724918
  0.16820000   2.07724716
  0.16820000   2.07724533
  0.16820000   2.07724367
  0.16820000   2.07724215
  0.16820000   2.07724075
  0.16820000   2.07723947
  0.16820000   2.07723827
  0.16820000   2.07723717
  0.16820000   2.07723614
  0.16820000   2.07723518
  0.16820000   2.07723429
  0.16820000   2.07723344
  0.16820000   2.07723265
  0.16820000   2.07723191
  0.16820000   2.07723121
  0.16820000   2.07723054
  0.16840000   2.07904414
  0.16840000   2.07904028
  0.16840000   2.07903677
  0.16840000   2.07903364
  0.16840000   2.07903085
  0.16840000   2.07902836
  0.16840000   2.07902614
  0.16840000   2.07902413
  0.16840000   2.07902231
  0.16840000   2.07902065
  0.16840000   2.07901914
  0.16840000   2.07901774
  0.16840000   2.07901646
  0.16840000   2.07901527
  0.16840000   2.07901417
  0.16840000   2.07901314
  0.16840000   2.07901218
  0.16840000   2.07901129
  0.16840000   2.07901045
  0.16840000   2.07900966
  0.16840000   2.07900891
  0.16840000   2.07900821
  0.16840000   2.07900755
  0.16860000   2.08080332
  0.16860000   2.08079942
  0.16860000   2.08079591
  0.16860000   2.08079279
  0.16860000   2.08079001
  0.16860000   2.08078754
  0.16860000   2.08078532
  0.16860000   2.08078332
  0.16860000   2.08078151
  0.16860000   2.08077986
  0.16860000   2.08077835
  0.16860000   2.08077696
  0.16860000   2.08077568
  0.16860000   2.08077449
  0.16860000   2.08077339
  0.16860000   2.08077237
  0.16860000   2.08077141
  0.16860000   2.08077052
  0.16860000   2.08076968
  0.16860000   2.08076889
  0.16860000   2.08076814
  0.16860000   2.08076744
  0.16860000   2.08076677
  0.16880000   2.08254499
  0.16880000   2.08254107
  0.16880000   2.08253756
  0.16880000   2.08253445
  0.16880000   2.08253170
  0.16880000   2.08252923
  0.16880000   2.08252703
  0.16880000   2.08252504
  0.16880000   2.08252323
  0.16880000   2.08252159
  0.16880000   2.08252008
  0.16880000   2.08251869
  0.16880000   2.08251742
  0.16880000   2.08251623
  0.16880000   2.08251513
  0.16880000   2.08251411
  0.16880000   2.08251315
  0.16880000   2.08251226
  0.16880000   2.08251142
  0.16880000   2.08251063
  0.16880000   2.08250989
  0.16880000   2.08250918
  0.16880000   2.08250852
  0.16900000   2.08426945
  0.16900000   2.08426552
  0.16900000   2.08426202
  0.16900000   2.08425892
  0.16900000   2.08425618
  0.16900000   2.08425373
  0.16900000   2.08425153
  0.16900000   2.08424955
  0.16900000   2.08424775
  0.16900000   2.08424611
  0.16900000   2.08424461
  0.16900000   2.08424323
  0.16900000   2.08424195
  0.16900000   2.08424077
  0.16900000   2.08423967
  0.16900000   2.08423865
  0.16900000   2.08423770
  0.16900000   2.08423680
  0.16900000   2.08423596
  0.16900000   2.08423517
  0.16900000   2.08423443
  0.16900000   2.08423373
  0.16900000   2.08423306
  0.16920000   2.08597698
  0.16920000   2.08597304
  0.16920000   2.08596955
  0.16920000   2.08596647
  0.16920000   2.08596374
  0.16920000   2.08596131
  0.16920000   2.08595912
  0.16920000   2.08595715
  0.16920000   2.08595535
  0.16920000   2.08595372
  0.16920000   2.08595222
  0.16920000   2.08595084
  0.16920000   2.08594957
  0.16920000   2.08594839
  0.16920000   2.08594729
  0.16920000   2.08594627
  0.16920000   2.08594532
  0.16920000   2.08594442
  0.16920000   2.08594359
  0.16920000   2.08594280
  0.16920000   2.08594205
  0.16920000   2.08594135
  0.16920000   2.08594069
  0.16940000   2.08766785
  0.16940000   2.08766391
  0.16940000   2.08766044
  0.16940000   2.08765738
  0.16940000   2.08765466
  0.16940000   2.08765224
  0.16940000   2.08765006
  0.16940000   2.08764809
  0.16940000   2.08764630
  0.16940000   2.08764467
  0.16940000   2.08764318
  0.16940000   2.08764180
  0.16940000   2.08764053
  0.16940000   2.08763936
  0.16940000   2.08763826
  0.16940000   2.08763724
  0.16940000   2.08763629
  0.16940000   2.08763540
  0.16940000   2.08763456
  0.16940000   2.08763377
  0.16940000   2.08763302
  0.16940000   2.08763232
  0.16940000   2.08763166
  0.16960000   2.08934233
  0.16960000   2.08933840
  0.16960000   2.08933494
  0.16960000   2.08933190
  0.16960000   2.08932919
  0.16960000   2.08932678
  0.16960000   2.08932461
  0.16960000   2.08932265
  0.16960000   2.08932087
  0.16960000   2.08931925
  0.16960000   2.08931776
  0.16960000   2.08931638
  0.16960000   2.08931512
  0.16960000   2.08931394
  0.16960000   2.08931285
  0.16960000   2.08931183
  0.16960000   2.08931087
  0.16960000   2.08930998
  0.16960000   2.08930914
  0.16960000   2.08930836
  0.16960000   2.08930761
  0.16960000   2.08930691
  0.16960000   2.08930624
  0.16980000   2.09100068
  0.16980000   2.09099676
  0.16980000   2.09099332
  0.16980000   2.09099029
  0.16980000   2.09098760
  0.16980000   2.09098520
  0.16980000   2.09098304
  0.16980000   2.09098109
  0.16980000   2.09097931
  0.16980000   2.09097769
  0.16980000   2.09097621
  0.16980000   2.09097484
  0.16980000   2.09097357
  0.16980000   2.09097240
  0.16980000   2.09097130
  0.16980000   2.09097029
  0.16980000   2.09096933
  0.16980000   2.09096844
  0.16980000   2.09096760
  0.16980000   2.09096682
  0.16980000   2.09096607
  0.16980000   2.09096537
  0.16980000   2.09096471
  0.17000000   2.09264315
  0.17000000   2.09263925
  0.17000000   2.09263583
  0.17000000   2.09263282
  0.17000000   2.09263014
  0.17000000   2.09262775
  0.17000000   2.09262560
  0.17000000   2.09262366
  0.17000000   2.09262189
  0.17000000   2.09262027
  0.17000000   2.09261879
  0.17000000   2.09261742
  0.17000000   2.09261615
  0.17000000   2.09261498
  0.17000000   2.09261389
  0.17000000   2.09261287
  0.17000000   2.09261192
  0.17000000   2.09261103
  0.17000000   2.09261019
  0.17000000   2.09260940
  0.17000000   2.09260866
  0.17000000   2.09260796
  0.17000000   2.09260729
  0.17020000   2.09427000
  0.17020000   2.09426612
  0.17020000   2.09426272
  0.17020000   2.09425972
  0.17020000   2.09425706
  0.17020000   2.09425468
  0.17020000   2.09425254
  0.17020000   2.09425060
  0.17020000   2.09424883
  0.17020000   2.09424722
  0.17020000   2.09424574
  0.17020000   2.09424437
  0.17020000   2.09424311
  0.17020000   2.09424194
  0.17020000   2.09424085
  0.17020000   2.09423984
  0.17020000   2.09423888
  0.17020000   2.09423799
  0.17020000   2.09423716
  0.17020000   2.09423637
  0.17020000   2.09423562
  0.17020000   2.09423492
  0.17020000   2.09423426
  0.17040000   2.09588147
  0.17040000   2.09587761
  0.17040000   2.09587423
  0.17040000   2.09587124
  0.17040000   2.09586860
  0.17040000   2.09586622
  0.17040000   2.09586409
  0.17040000   2.09586216
  0.17040000   2.09586040
  0.17040000   2.09585879
  0.17040000   2.09585731
  0.17040000   2.09585595
  0.17040000   2.09585469
  0.17040000   2.09585352
  0.17040000   2.09585243
  0.17040000   2.09585141
  0.17040000   2.09585046
  0.17040000   2.09584957
  0.17040000   2.09584874
  0.17040000   2.09584795
  0.17040000   2.09584720
  0.17040000   2.09584650
  0.17040000   2.09584584
  0.17060000   2.09747780
  0.17060000   2.09747395
  0.17060000   2.09747059
  0.17060000   2.09746762
  0.17060000   2.09746499
  0.17060000   2.09746263
  0.17060000   2.09746050
  0.17060000   2.09745857
  0.17060000   2.09745682
  0.17060000   2.09745521
  0.17060000   2.09745374
  0.17060000   2.09745238
  0.17060000   2.09745112
  0.17060000   2.09744995
  0.17060000   2.09744886
  0.17060000   2.09744785
  0.17060000   2.09744690
  0.17060000   2.09744601
  0.17060000   2.09744517
  0.17060000   2.09744438
  0.17060000   2.09744364
  0.17060000   2.09744294
  0.17060000   2.09744227
  0.17080000   2.09905921
  0.17080000   2.09905539
  0.17080000   2.09905204
  0.17080000   2.09904909
  0.17080000   2.09904647
  0.17080000   2.09904412
  0.17080000   2.09904200
  0.17080000   2.09904008
  0.17080000   2.09903833
  0.17080000   2.09903672
  0.17080000   2.09903525
  0.17080000   2.09903389
  0.17080000   2.09903264
  0.17080000   2.09903147
  0.17080000   2.09903038
  0.17080000   2.09902937
  0.17080000   2.09902842
  0.17080000   2.09902753
  0.17080000   2.09902669
  0.17080000   2.09902590
  0.17080000   2.09902516
  0.17080000   2.09902446
  0.17080000   2.09902379
  0.17100000   2.10062594
  0.17100000   2.10062214
  0.17100000   2.10061881
  0.17100000   2.10061588
  0.17100000   2.10061326
  0.17100000   2.10061092
  0.17100000   2.10060881
  0.17100000   2.10060689
  0.17100000   2.10060515
  0.17100000   2.10060355
  0.17100000   2.10060208
  0.17100000   2.10060072
  0.17100000   2.10059947
  0.17100000   2.10059830
  0.17100000   2.10059722
  0.17100000   2.10059620
  0.17100000   2.10059525
  0.17100000   2.10059436
  0.17100000   2.10059352
  0.17100000   2.10059274
  0.17100000   2.10059199
  0.17100000   2.10059129
  0.17100000   2.10059062
  0.17120000   2.10217820
  0.17120000   2.10217443
  0.17120000   2.10217112
  0.17120000   2.10216820
  0.17120000   2.10216560
  0.17120000   2.10216326
  0.17120000   2.10216116
  0.17120000   2.10215925
  0.17120000   2.10215750
  0.17120000   2.10215591
  0.17120000   2.10215444
  0.17120000   2.10215309
  0.17120000   2.10215183
  0.17120000   2.10215067
  0.17120000   2.10214958
  0.17120000   2.10214857
  0.17120000   2.10214762
  0.17120000   2.10214673
  0.17120000   2.10214589
  0.17120000   2.10214510
  0.17120000   2.10214436
  0.17120000   2.10214366
  0.17120000   2.10214299
  0.17140000   2.10371622
  0.17140000   2.10371247
  0.17140000   2.10370918
  0.17140000   2.10370627
  0.17140000   2.10370368
  0.17140000   2.10370135
  0.17140000   2.10369926
  0.17140000   2.10369735
  0.17140000   2.10369561
  0.17140000   2.10369402
  0.17140000   2.10369256
  0.17140000   2.10369120
  0.17140000   2.10368995
  0.17140000   2.10368879
  0.17140000   2.10368770
  0.17140000   2.10368669
  0.17140000   2.10368574
  0.17140000   2.10368485
  0.17140000   2.10368401
  0.17140000   2.10368322
  0.17140000   2.10368248
  0.17140000   2.10368177
  0.17140000   2.10368111
  0.17160000   2.10524021
  0.17160000   2.10523648
  0.17160000   2.10523321
  0.17160000   2.10523031
  0.17160000   2.10522773
  0.17160000   2.10522541
  0.17160000   2.10522332
  0.17160000   2.10522142
  0.17160000   2.10521969
  0.17160000   2.10521810
  0.17160000   2.10521663
  0.17160000   2.10521528
  0.17160000   2.10521403
  0.17160000   2.10521287
  0.17160000   2.10521178
  0.17160000   2.10521077
  0.17160000   2.10520982
  0.17160000   2.10520893
  0.17160000   2.10520809
  0.17160000   2.10520731
  0.17160000   2.10520656
  0.17160000   2.10520586
  0.17160000   2.10520519
  0.17180000   2.10675038
  0.17180000   2.10674667
  0.17180000   2.10674341
  0.17180000   2.10674053
  0.17180000   2.10673795
  0.17180000   2.10673565
  0.17180000   2.10673356
  0.17180000   2.10673166
  0.17180000   2.10672993
  0.17180000   2.10672834
  0.17180000   2.10672688
  0.17180000   2.10672553
  0.17180000   2.10672428
  0.17180000   2.10672312
  0.17180000   2.10672204
  0.17180000   2.10672103
  0.17180000   2.10672008
  0.17180000   2.10671919
  0.17180000   2.10671835
  0.17180000   2.10671756
  0.17180000   2.10671681
  0.17180000   2.10671611
  0.17180000   2.10671544
  0.17200000   2.10824692
  0.17200000   2.10824323
  0.17200000   2.10823999
  0.17200000   2.10823712
  0.17200000   2.10823456
  0.17200000   2.10823225
  0.17200000   2.10823017
  0.17200000   2.10822828
  0.17200000   2.10822655
  0.17200000   2.10822497
  0.17200000   2.10822351
  0.17200000   2.10822216
  0.17200000   2.10822091
  0.17200000   2.10821975
  0.17200000   2.10821867
  0.17200000   2.10821766
  0.17200000   2.10821671
  0.17200000   2.10821582
  0.17200000   2.10821498
  0.17200000   2.10821419
  0.17200000   2.10821344
  0.17200000   2.10821274
  0.17200000   2.10821207
  0.17220000   2.10973004
  0.17220000   2.10972637
  0.17220000   2.10972314
  0.17220000   2.10972029
  0.17220000   2.10971773
  0.17220000   2.10971544
  0.17220000   2.10971336
  0.17220000   2.10971147
  0.17220000   2.10970975
  0.17220000   2.10970817
  0.17220000   2.10970671
  0.17220000   2.10970537
  0.17220000   2.10970412
  0.17220000   2.10970296
  0.17220000   2.10970187
  0.17220000   2.10970086
  0.17220000   2.10969991
  0.17220000   2.10969902
  0.17220000   2.10969818
  0.17220000   2.10969739
  0.17220000   2.10969665
  0.17220000   2.10969594
  0.17220000   2.10969527
  0.17240000   2.11119993
  0.17240000   2.11119628
  0.17240000   2.11119307
  0.17240000   2.11119023
  0.17240000   2.11118768
  0.17240000   2.11118539
  0.17240000   2.11118332
  0.17240000   2.11118144
  0.17240000   2.11117972
  0.17240000   2.11117814
  0.17240000   2.11117668
  0.17240000   2.11117534
  0.17240000   2.11117409
  0.17240000   2.11117293
  0.17240000   2.11117185
  0.17240000   2.11117084
  0.17240000   2.11116989
  0.17240000   2.11116900
  0.17240000   2.11116816
  0.17240000   2.11116737
  0.17240000   2.11116662
  0.17240000   2.11116592
  0.17240000   2.11116525
  0.17260000   2.11265679
  0.17260000   2.11265316
  0.17260000   2.11264996
  0.17260000   2.11264713
  0.17260000   2.11264459
  0.17260000   2.11264231
  0.17260000   2.11264024
  0.17260000   2.11263837
  0.17260000   2.11263665
  0.17260000   2.11263507
  0.17260000   2.11263362
  0.17260000   2.11263227
  0.17260000   2.11263103
  0.17260000   2.11262987
  0.17260000   2.11262878
  0.17260000   2.11262777
  0.17260000   2.11262682
  0.17260000   2.11262593
  0.17260000   2.11262509
  0.17260000   2.11262430
  0.17260000   2.11262356
  0.17260000   2.11262285
  0.17260000   2.11262218
  0.17280000   2.11410080
  0.17280000   2.11409719
  0.17280000   2.11409401
  0.17280000   2.11409118
  0.17280000   2.11408865
  0.17280000   2.11408638
  0.17280000   2.11408432
  0.17280000   2.11408244
  0.17280000   2.11408072
  0.17280000   2.11407915
  0.17280000   2.11407770
  0.17280000   2.11407635
  0.17280000   2.11407511
  0.17280000   2.11407395
  0.17280000   2.11407287
  0.17280000   2.11407186
  0.17280000   2.11407091
  0.17280000   2.11407002
  0.17280000   2.11406918
  0.17280000   2.11406839
  0.17280000   2.11406764
  0.17280000   2.11406693
  0.17280000   2.11406626
  0.17300000   2.11553215
  0.17300000   2.11552855
  0.17300000   2.11552538
  0.17300000   2.11552257
  0.17300000   2.11552005
  0.17300000   2.11551778
  0.17300000   2.11551572
  0.17300000   2.11551385
  0.17300000   2.11551213
  0.17300000   2.11551056
  0.17300000   2.11550911
  0.17300000   2.11550777
  0.17300000   2.11550652
  0.17300000   2.11550536
  0.17300000   2.11550428
  0.17300000   2.11550327
  0.17300000   2.11550232
  0.17300000   2.11550143
  0.17300000   2.11550059
  0.17300000   2.11549980
  0.17300000   2.11549905
  0.17300000   2.11549835
  0.17300000   2.11549768
  0.17320000   2.11695100
  0.17320000   2.11694742
  0.17320000   2.11694427
  0.17320000   2.11694146
  0.17320000   2.11693895
  0.17320000   2.11693669
  0.17320000   2.11693464
  0.17320000   2.11693277
  0.17320000   2.11693106
  0.17320000   2.11692948
  0.17320000   2.11692803
  0.17320000   2.11692669
  0.17320000   2.11692545
  0.17320000   2.11692429
  0.17320000   2.11692321
  0.17320000   2.11692220
  0.17320000   2.11692125
  0.17320000   2.11692036
  0.17320000   2.11691952
  0.17320000   2.11691873
  0.17320000   2.11691798
  0.17320000   2.11691727
  0.17320000   2.11691660
  0.17340000   2.11835755
  0.17340000   2.11835399
  0.17340000   2.11835085
  0.17340000   2.11834805
  0.17340000   2.11834554
  0.17340000   2.11834329
  0.17340000   2.11834124
  0.17340000   2.11833937
  0.17340000   2.11833766
  0.17340000   2.11833609
  0.17340000   2.11833465
  0.17340000   2.11833331
  0.17340000   2.11833206
  0.17340000   2.11833090
  0.17340000   2.11832982
  0.17340000   2.11832881
  0.17340000   2.11832786
  0.17340000   2.11832697
  0.17340000   2.11832613
  0.17340000   2.11832534
  0.17340000   2.11832459
  0.17340000   2.11832388
  0.17340000   2.11832321
  0.17360000   2.11975196
  0.17360000   2.11974842
  0.17360000   2.11974528
  0.17360000   2.11974250
  0.17360000   2.11974000
  0.17360000   2.11973775
  0.17360000   2.11973570
  0.17360000   2.11973384
  0.17360000   2.11973213
  0.17360000   2.11973057
  0.17360000   2.11972912
  0.17360000   2.11972778
  0.17360000   2.11972654
  0.17360000   2.11972538
  0.17360000   2.11972430
  0.17360000   2.11972329
  0.17360000   2.11972234
  0.17360000   2.11972144
  0.17360000   2.11972060
  0.17360000   2.11971981
  0.17360000   2.11971906
  0.17360000   2.11971835
  0.17360000   2.11971768
  0.17380000   2.12113441
  0.17380000   2.12113087
  0.17380000   2.12112775
  0.17380000   2.12112498
  0.17380000   2.12112248
  0.17380000   2.12112024
  0.17380000   2.12111820
  0.17380000   2.12111634
  0.17380000   2.12111463
  0.17380000   2.12111307
  0.17380000   2.12111162
  0.17380000   2.12111028
  0.17380000   2.12110904
  0.17380000   2.12110788
  0.17380000   2.12110680
  0.17380000   2.12110579
  0.17380000   2.12110484
  0.17380000   2.12110395
  0.17380000   2.12110311
  0.17380000   2.12110231
  0.17380000   2.12110156
  0.17380000   2.12110085
  0.17380000   2.12110018
  0.17400000   2.12250504
  0.17400000   2.12250153
  0.17400000   2.12249842
  0.17400000   2.12249565
  0.17400000   2.12249316
  0.17400000   2.12249092
  0.17400000   2.12248888
  0.17400000   2.12248703
  0.17400000   2.12248533
  0.17400000   2.12248376
  0.17400000   2.12248232
  0.17400000   2.12248098
  0.17400000   2.12247974
  0.17400000   2.12247858
  0.17400000   2.12247750
  0.17400000   2.12247648
  0.17400000   2.12247554
  0.17400000   2.12247464
  0.17400000   2.12247380
  0.17400000   2.12247301
  0.17400000   2.12247226
  0.17400000   2.12247155
  0.17400000   2.12247087
  0.17420000   2.12386404
  0.17420000   2.12386054
  0.17420000   2.12385744
  0.17420000   2.12385468
  0.17420000   2.12385220
  0.17420000   2.12384996
  0.17420000   2.12384793
  0.17420000   2.12384608
  0.17420000   2.12384438
  0.17420000   2.12384281
  0.17420000   2.12384137
  0.17420000   2.12384003
  0.17420000   2.12383879
  0.17420000   2.12383763
  0.17420000   2.12383655
  0.17420000   2.12383554
  0.17420000   2.12383459
  0.17420000   2.12383370
  0.17420000   2.12383285
  0.17420000   2.12383206
  0.17420000   2.12383131
  0.17420000   2.12383060
  0.17420000   2.12382992
  0.17440000   2.12521156
  0.17440000   2.12520807
  0.17440000   2.12520499
  0.17440000   2.12520223
  0.17440000   2.12519976
  0.17440000   2.12519752
  0.17440000   2.12519549
  0.17440000   2.12519364
  0.17440000   2.12519194
  0.17440000   2.12519038
  0.17440000   2.12518894
  0.17440000   2.12518760
  0.17440000   2.12518636
  0.17440000   2.12518520
  0.17440000   2.12518412
  0.17440000   2.12518311
  0.17440000   2.12518216
  0.17440000   2.12518127
  0.17440000   2.12518042
  0.17440000   2.12517963
  0.17440000   2.12517888
  0.17440000   2.12517817
  0.17440000   2.12517749
  0.17460000   2.12654775
  0.17460000   2.12654428
  0.17460000   2.12654120
  0.17460000   2.12653845
  0.17460000   2.12653599
  0.17460000   2.12653376
  0.17460000   2.12653173
  0.17460000   2.12652988
  0.17460000   2.12652818
  0.17460000   2.12652662
  0.17460000   2.12652518
  0.17460000   2.12652385
  0.17460000   2.12652260
  0.17460000   2.12652145
  0.17460000   2.12652037
  0.17460000   2.12651935
  0.17460000   2.12651840
  0.17460000   2.12651751
  0.17460000   2.12651667
  0.17460000   2.12651587
  0.17460000   2.12651512
  0.17460000   2.12651441
  0.17460000   2.12651373
  0.17480000   2.12787278
  0.17480000   2.12786931
  0.17480000   2.12786624
  0.17480000   2.12786351
  0.17480000   2.12786104
  0.17480000   2.12785882
  0.17480000   2.12785679
  0.17480000   2.12785495
  0.17480000   2.12785325
  0.17480000   2.12785169
  0.17480000   2.12785025
  0.17480000   2.12784891
  0.17480000   2.12784767
  0.17480000   2.12784652
  0.17480000   2.12784543
  0.17480000   2.12784442
  0.17480000   2.12784347
  0.17480000   2.12784258
  0.17480000   2.12784173
  0.17480000   2.12784094
  0.17480000   2.12784018
  0.17480000   2.12783947
  0.17480000   2.12783880
  0.17500000   2.12918678
  0.17500000   2.12918332
  0.17500000   2.12918027
  0.17500000   2.12917753
  0.17500000   2.12917508
  0.17500000   2.12917285
  0.17500000   2.12917083
  0.17500000   2.12916899
  0.17500000   2.12916729
  0.17500000   2.12916574
  0.17500000   2.12916429
  0.17500000   2.12916296
  0.17500000   2.12916172
  0.17500000   2.12916056
  0.17500000   2.12915948
  0.17500000   2.12915847
  0.17500000   2.12915751
  0.17500000   2.12915662
  0.17500000   2.12915578
  0.17500000   2.12915498
  0.17500000   2.12915423
  0.17500000   2.12915351
  0.17500000   2.12915284
  0.17520000   2.13048990
  0.17520000   2.13048646
  0.17520000   2.13048341
  0.17520000   2.13048068
  0.17520000   2.13047823
  0.17520000   2.13047601
  0.17520000   2.13047400
  0.17520000   2.13047215
  0.17520000   2.13047046
  0.17520000   2.13046890
  0.17520000   2.13046746
  0.17520000   2.13046613
  0.17520000   2.13046489
  0.17520000   2.13046373
  0.17520000   2.13046265
  0.17520000   2.13046163
  0.17520000   2.13046068
  0.17520000   2.13045979
  0.17520000   2.13045894
  0.17520000   2.13045815
  0.17520000   2.13045739
  0.17520000   2.13045668
  0.17520000   2.13045600
  0.17540000   2.13178230
  0.17540000   2.13177887
  0.17540000   2.13177583
  0.17540000   2.13177311
  0.17540000   2.13177066
  0.17540000   2.13176844
  0.17540000   2.13176643
  0.17540000   2.13176459
  0.17540000   2.13176290
  0.17540000   2.13176134
  0.17540000   2.13175990
  0.17540000   2.13175857
  0.17540000   2.13175733
  0.17540000   2.13175617
  0.17540000   2.13175509
  0.17540000   2.13175407
  0.17540000   2.13175312
  0.17540000   2.13175222
  0.17540000   2.13175138
  0.17540000   2.13175058
  0.17540000   2.13174983
  0.17540000   2.13174911
  0.17540000   2.13174843
  0.17560000   2.13306410
  0.17560000   2.13306069
  0.17560000   2.13305765
  0.17560000   2.13305494
  0.17560000   2.13305250
  0.17560000   2.13305028
  0.17560000   2.13304827
  0.17560000   2.13304643
  0.17560000   2.13304474
  0.17560000   2.13304319
  0.17560000   2.13304175
  0.17560000   2.13304041
  0.17560000   2.13303917
  0.17560000   2.13303801
  0.17560000   2.13303693
  0.17560000   2.13303592
  0.17560000   2.13303497
  0.17560000   2.13303407
  0.17560000   2.13303322
  0.17560000   2.13303243
  0.17560000   2.13303167
  0.17560000   2.13303095
  0.17560000   2.13303028
  0.17580000   2.13433546
  0.17580000   2.13433205
  0.17580000   2.13432903
  0.17580000   2.13432632
  0.17580000   2.13432388
  0.17580000   2.13432167
  0.17580000   2.13431966
  0.17580000   2.13431783
  0.17580000   2.13431614
  0.17580000   2.13431458
  0.17580000   2.13431314
  0.17580000   2.13431181
  0.17580000   2.13431057
  0.17580000   2.13430941
  0.17580000   2.13430833
  0.17580000   2.13430731
  0.17580000   2.13430636
  0.17580000   2.13430546
  0.17580000   2.13430462
  0.17580000   2.13430382
  0.17580000   2.13430306
  0.17580000   2.13430235
  0.17580000   2.13430167
  0.17600000   2.13559651
  0.17600000   2.13559311
  0.17600000   2.13559009
  0.17600000   2.13558739
  0.17600000   2.13558496
  0.17600000   2.13558275
  0.17600000   2.13558074
  0.17600000   2.13557891
  0.17600000   2.13557722
  0.17600000   2.13557567
  0.17600000   2.13557423
  0.17600000   2.13557289
  0.17600000   2.13557165
  0.17600000   2.13557049
  0.17600000   2.13556941
  0.17600000   2.13556840
  0.17600000   2.13556744
  0.17600000   2.13556654
  0.17600000   2.13556570
  0.17600000   2.13556490
  0.17600000   2.13556414
  0.17600000   2.13556342
  0.17600000   2.13556274
  0.17620000   2.13684737
  0.17620000   2.13684399
  0.17620000   2.13684098
  0.17620000   2.13683828
  0.17620000   2.13683585
  0.17620000   2.13683365
  0.17620000   2.13683164
  0.17620000   2.13682981
  0.17620000   2.13682812
  0.17620000   2.13682657
  0.17620000   2.13682513
  0.17620000   2.13682380
  0.17620000   2.13682256
  0.17620000   2.13682140
  0.17620000   2.13682031
  0.17620000   2.13681930
  0.17620000   2.13681834
  0.17620000   2.13681745
  0.17620000   2.13681660
  0.17620000   2.13681580
  0.17620000   2.13681504
  0.17620000   2.13681432
  0.17620000   2.13681364
  0.17640000   2.13808819
  0.17640000   2.13808482
  0.17640000   2.13808181
  0.17640000   2.13807912
  0.17640000   2.13807670
  0.17640000   2.13807450
  0.17640000   2.13807249
  0.17640000   2.13807066
  0.17640000   2.13806898
  0.17640000   2.13806742
  0.17640000   2.13806599
  0.17640000   2.13806465
  0.17640000   2.13806341
  0.17640000   2.13806225
  0.17640000   2.13806117
  0.17640000   2.13806015
  0.17640000   2.13805920
  0.17640000   2.13805830
  0.17640000   2.13805745
  0.17640000   2.13805665
  0.17640000   2.13805589
  0.17640000   2.13805517
  0.17640000   2.13805449
  0.17660000   2.13931910
  0.17660000   2.13931573
  0.17660000   2.13931273
  0.17660000   2.13931005
  0.17660000   2.13930763
  0.17660000   2.13930543
  0.17660000   2.13930343
  0.17660000   2.13930160
  0.17660000   2.13929991
  0.17660000   2.13929836
  0.17660000   2.13929692
  0.17660000   2.13929559
  0.17660000   2.13929435
  0.17660000   2.13929319
  0.17660000   2.13929210
  0.17660000   2.13929109
  0.17660000   2.13929013
  0.17660000   2.13928923
  0.17660000   2.13928838
  0.17660000   2.13928758
  0.17660000   2.13928682
  0.17660000   2.13928610
  0.17660000   2.13928542
  0.17680000   2.14054021
  0.17680000   2.14053685
  0.17680000   2.14053386
  0.17680000   2.14053118
  0.17680000   2.14052876
  0.17680000   2.14052657
  0.17680000   2.14052457
  0.17680000   2.14052274
  0.17680000   2.14052105
  0.17680000   2.14051950
  0.17680000   2.14051807
  0.17680000   2.14051673
  0.17680000   2.14051549
  0.17680000   2.14051433
  0.17680000   2.14051325
  0.17680000   2.14051223
  0.17680000   2.14051127
  0.17680000   2.14051037
  0.17680000   2.14050952
  0.17680000   2.14050872
  0.17680000   2.14050796
  0.17680000   2.14050724
  0.17680000   2.14050656
  0.17700000   2.14175166
  0.17700000   2.14174831
  0.17700000   2.14174532
  0.17700000   2.14174265
  0.17700000   2.14174023
  0.17700000   2.14173804
  0.17700000   2.14173604
  0.17700000   2.14173421
  0.17700000   2.14173253
  0.17700000   2.14173098
  0.17700000   2.14172954
  0.17700000   2.14172821
  0.17700000   2.14172697
  0.17700000   2.14172581
  0.17700000   2.14172472
  0.17700000   2.14172370
  0.17700000   2.14172275
  0.17700000   2.14172184
  0.17700000   2.14172099
  0.17700000   2.14172019
  0.17700000   2.14171943
  0.17700000   2.14171871
  0.17700000   2.14171802
  0.17720000   2.14295356
  0.17720000   2.14295022
  0.17720000   2.14294724
  0.17720000   2.14294457
  0.17720000   2.14294216
  0.17720000   2.14293997
  0.17720000   2.14293797
  0.17720000   2.14293614
  0.17720000   2.14293446
  0.17720000   2.14293291
  0.17720000   2.14293147
  0.17720000   2.14293014
  0.17720000   2.14292890
  0.17720000   2.14292774
  0.17720000   2.14292665
  0.17720000   2.14292563
  0.17720000   2.14292467
  0.17720000   2.14292377
  0.17720000   2.14292292
  0.17720000   2.14292212
  0.17720000   2.14292136
  0.17720000   2.14292063
  0.17720000   2.14291995
  0.17740000   2.14414604
  0.17740000   2.14414271
  0.17740000   2.14413973
  0.17740000   2.14413707
  0.17740000   2.14413466
  0.17740000   2.14413247
  0.17740000   2.14413047
  0.17740000   2.14412865
  0.17740000   2.14412697
  0.17740000   2.14412542
  0.17740000   2.14412398
  0.17740000   2.14412264
  0.17740000   2.14412140
  0.17740000   2.14412024
  0.17740000   2.14411915
  0.17740000   2.14411814
  0.17740000   2.14411718
  0.17740000   2.14411627
  0.17740000   2.14411542
  0.17740000   2.14411462
  0.17740000   2.14411386
  0.17740000   2.14411313
  0.17740000   2.14411245
  0.17760000   2.14532921
  0.17760000   2.14532589
  0.17760000   2.14532292
  0.17760000   2.14532026
  0.17760000   2.14531785
  0.17760000   2.14531567
  0.17760000   2.14531367
  0.17760000   2.14531185
  0.17760000   2.14531017
  0.17760000   2.14530861
  0.17760000   2.14530718
  0.17760000   2.14530584
  0.17760000   2.14530460
  0.17760000   2.14530344
  0.17760000   2.14530235
  0.17760000   2.14530133
  0.17760000   2.14530037
  0.17760000   2.14529947
  0.17760000   2.14529862
  0.17760000   2.14529781
  0.17760000   2.14529705
  0.17760000   2.14529633
  0.17760000   2.14529564
  0.17780000   2.14650320
  0.17780000   2.14649988
  0.17780000   2.14649692
  0.17780000   2.14649426
  0.17780000   2.14649185
  0.17780000   2.14648967
  0.17780000   2.14648768
  0.17780000   2.14648585
  0.17780000   2.14648417
  0.17780000   2.14648262
  0.17780000   2.14648119
  0.17780000   2.14647985
  0.17780000   2.14647861
  0.17780000   2.14647745
  0.17780000   2.14647636
  0.17780000   2.14647534
  0.17780000   2.14647438
  0.17780000   2.14647347
  0.17780000   2.14647262
  0.17780000   2.14647181
  0.17780000   2.14647105
  0.17780000   2.14647033
  0.17780000   2.14646964
  0.17800000   2.14766810
  0.17800000   2.14766479
  0.17800000   2.14766184
  0.17800000   2.14765918
  0.17800000   2.14765678
  0.17800000   2.14765460
  0.17800000   2.14765261
  0.17800000   2.14765078
  0.17800000   2.14764910
  0.17800000   2.14764755
  0.17800000   2.14764612
  0.17800000   2.14764478
  0.17800000   2.14764354
  0.17800000   2.14764237
  0.17800000   2.14764129
  0.17800000   2.14764027
  0.17800000   2.14763930
  0.17800000   2.14763840
  0.17800000   2.14763755
  0.17800000   2.14763674
  0.17800000   2.14763597
  0.17800000   2.14763525
  0.17800000   2.14763456
  0.17820000   2.14882405
  0.17820000   2.14882074
  0.17820000   2.14881779
  0.17820000   2.14881514
  0.17820000   2.14881274
  0.17820000   2.14881056
  0.17820000   2.14880857
  0.17820000   2.14880675
  0.17820000   2.14880507
  0.17820000   2.14880352
  0.17820000   2.14880208
  0.17820000   2.14880075
  0.17820000   2.14879950
  0.17820000   2.14879834
  0.17820000   2.14879725
  0.17820000   2.14879623
  0.17820000   2.14879527
  0.17820000   2.14879436
  0.17820000   2.14879351
  0.17820000   2.14879270
  0.17820000   2.14879193
  0.17820000   2.14879121
  0.17820000   2.14879052
  0.17840000   2.14997113
  0.17840000   2.14996784
  0.17840000   2.14996489
  0.17840000   2.14996224
  0.17840000   2.14995985
  0.17840000   2.14995767
  0.17840000   2.14995568
  0.17840000   2.14995386
  0.17840000   2.14995218
  0.17840000   2.14995063
  0.17840000   2.14994919
  0.17840000   2.14994785
  0.17840000   2.14994661
  0.17840000   2.14994545
  0.17840000   2.14994436
  0.17840000   2.14994333
  0.17840000   2.14994237
  0.17840000   2.14994147
  0.17840000   2.14994061
  0.17840000   2.14993980
  0.17840000   2.14993904
  0.17840000   2.14993831
  0.17840000   2.14993762
  0.17860000   2.15110948
  0.17860000   2.15110618
  0.17860000   2.15110324
  0.17860000   2.15110060
  0.17860000   2.15109820
  0.17860000   2.15109603
  0.17860000   2.15109404
  0.17860000   2.15109222
  0.17860000   2.15109054
  0.17860000   2.15108899
  0.17860000   2.15108755
  0.17860000   2.15108622
  0.17860000   2.15108497
  0.17860000   2.15108381
  0.17860000   2.15108272
  0.17860000   2.15108169
  0.17860000   2.15108073
  0.17860000   2.15107982
  0.17860000   2.15107897
  0.17860000   2.15107816
  0.17860000   2.15107739
  0.17860000   2.15107666
  0.17860000   2.15107597
  0.17880000   2.15223918
  0.17880000   2.15223589
  0.17880000   2.15223295
  0.17880000   2.15223031
  0.17880000   2.15222792
  0.17880000   2.15222575
  0.17880000   2.15222376
  0.17880000   2.15222194
  0.17880000   2.15222026
  0.17880000   2.15221871
  0.17880000   2.15221727
  0.17880000   2.15221594
  0.17880000   2.15221469
  0.17880000   2.15221353
  0.17880000   2.15221243
  0.17880000   2.15221141
  0.17880000   2.15221045
  0.17880000   2.15220954
  0.17880000   2.15220868
  0.17880000   2.15220787
  0.17880000   2.15220710
  0.17880000   2.15220638
  0.17880000   2.15220568
  0.17900000   2.15336034
  0.17900000   2.15335706
  0.17900000   2.15335413
  0.17900000   2.15335149
  0.17900000   2.15334910
  0.17900000   2.15334693
  0.17900000   2.15334494
  0.17900000   2.15334312
  0.17900000   2.15334144
  0.17900000   2.15333989
  0.17900000   2.15333846
  0.17900000   2.15333712
  0.17900000   2.15333587
  0.17900000   2.15333471
  0.17900000   2.15333362
  0.17900000   2.15333259
  0.17900000   2.15333163
  0.17900000   2.15333072
  0.17900000   2.15332986
  0.17900000   2.15332905
  0.17900000   2.15332828
  0.17900000   2.15332755
  0.17900000   2.15332686
  0.17920000   2.15447307
  0.17920000   2.15446980
  0.17920000   2.15446687
  0.17920000   2.15446424
  0.17920000   2.15446185
  0.17920000   2.15445968
  0.17920000   2.15445769
  0.17920000   2.15445587
  0.17920000   2.15445419
  0.17920000   2.15445264
  0.17920000   2.15445121
  0.17920000   2.15444987
  0.17920000   2.15444862
  0.17920000   2.15444745
  0.17920000   2.15444636
  0.17920000   2.15444534
  0.17920000   2.15444437
  0.17920000   2.15444346
  0.17920000   2.15444260
  0.17920000   2.15444179
  0.17920000   2.15444102
  0.17920000   2.15444029
  0.17920000   2.15443960
  0.17940000   2.15557747
  0.17940000   2.15557420
  0.17940000   2.15557128
  0.17940000   2.15556865
  0.17940000   2.15556626
  0.17940000   2.15556409
  0.17940000   2.15556211
  0.17940000   2.15556029
  0.17940000   2.15555861
  0.17940000   2.15555706
  0.17940000   2.15555562
  0.17940000   2.15555428
  0.17940000   2.15555303
  0.17940000   2.15555187
  0.17940000   2.15555077
  0.17940000   2.15554975
  0.17940000   2.15554878
  0.17940000   2.15554787
  0.17940000   2.15554701
  0.17940000   2.15554620
  0.17940000   2.15554543
  0.17940000   2.15554470
  0.17940000   2.15554400
  0.17960000   2.15667364
  0.17960000   2.15667038
  0.17960000   2.15666745
  0.17960000   2.15666482
  0.17960000   2.15666244
  0.17960000   2.15666027
  0.17960000   2.15665829
  0.17960000   2.15665647
  0.17960000   2.15665479
  0.17960000   2.15665324
  0.17960000   2.15665180
  0.17960000   2.15665046
  0.17960000   2.15664921
  0.17960000   2.15664805
  0.17960000   2.15664695
  0.17960000   2.15664593
  0.17960000   2.15664496
  0.17960000   2.15664405
  0.17960000   2.15664319
  0.17960000   2.15664237
  0.17960000   2.15664160
  0.17960000   2.15664087
  0.17960000   2.15664017
  0.17980000   2.15776167
  0.17980000   2.15775841
  0.17980000   2.15775549
  0.17980000   2.15775286
  0.17980000   2.15775048
  0.17980000   2.15774832
  0.17980000   2.15774633
  0.17980000   2.15774451
  0.17980000   2.15774284
  0.17980000   2.15774128
  0.17980000   2.15773984
  0.17980000   2.15773851
  0.17980000   2.15773726
  0.17980000   2.15773609
  0.17980000   2.15773499
  0.17980000   2.15773397
  0.17980000   2.15773300
  0.17980000   2.15773209
  0.17980000   2.15773122
  0.17980000   2.15773041
  0.17980000   2.15772964
  0.17980000   2.15772890
  0.17980000   2.15772821
  0.18000000   2.15884166
  0.18000000   2.15883840
  0.18000000   2.15883549
  0.18000000   2.15883286
  0.18000000   2.15883048
  0.18000000   2.15882832
  0.18000000   2.15882634
  0.18000000   2.15882452
  0.18000000   2.15882284
  0.18000000   2.15882129
  0.18000000   2.15881985
  0.18000000   2.15881851
  0.18000000   2.15881726
  0.18000000   2.15881609
  0.18000000   2.15881499
  0.18000000   2.15881396
  0.18000000   2.15881300
  0.18000000   2.15881208
  0.18000000   2.15881122
  0.18000000   2.15881040
  0.18000000   2.15880963
  0.18000000   2.15880890
  0.18000000   2.15880820
  0.18020000   2.15991370
  0.18020000   2.15991045
  0.18020000   2.15990754
  0.18020000   2.15990492
  0.18020000   2.15990254
  0.18020000   2.15990037
  0.18020000   2.15989839
  0.18020000   2.15989657
  0.18020000   2.15989489
  0.18020000   2.15989334
  0.18020000   2.15989190
  0.18020000   2.15989056
  0.18020000   2.15988931
  0.18020000   2.15988814
  0.18020000   2.15988705
  0.18020000   2.15988602
  0.18020000   2.15988505
  0.18020000   2.15988413
  0.18020000   2.15988327
  0.18020000   2.15988245
  0.18020000   2.15988168
  0.18020000   2.15988094
  0.18020000   2.15988024
  0.18040000   2.16097789
  0.18040000   2.16097464
  0.18040000   2.16097174
  0.18040000   2.16096912
  0.18040000   2.16096674
  0.18040000   2.16096457
  0.18040000   2.16096259
  0.18040000   2.16096077
  0.18040000   2.16095910
  0.18040000   2.16095754
  0.18040000   2.16095610
  0.18040000   2.16095476
  0.18040000   2.16095351
  0.18040000   2.16095234
  0.18040000   2.16095124
  0.18040000   2.16095021
  0.18040000   2.16094924
  0.18040000   2.16094833
  0.18040000   2.16094746
  0.18040000   2.16094664
  0.18040000   2.16094587
  0.18040000   2.16094513
  0.18040000   2.16094443
  0.18060000   2.16203431
  0.18060000   2.16203107
  0.18060000   2.16202817
  0.18060000   2.16202555
  0.18060000   2.16202318
  0.18060000   2.16202101
  0.18060000   2.16201903
  0.18060000   2.16201721
  0.18060000   2.16201553
  0.18060000   2.16201398
  0.18060000   2.16201254
  0.18060000   2.16201120
  0.18060000   2.16200995
  0.18060000   2.16200877
  0.18060000   2.16200768
  0.18060000   2.16200664
  0.18060000   2.16200567
  0.18060000   2.16200476
  0.18060000   2.16200389
  0.18060000   2.16200307
  0.18060000   2.16200230
  0.18060000   2.16200156
  0.18060000   2.16200086
  0.18080000   2.16308306
  0.18080000   2.16307983
  0.18080000   2.16307693
  0.18080000   2.16307431
  0.18080000   2.16307194
  0.18080000   2.16306978
  0.18080000   2.16306780
  0.18080000   2.16306598
  0.18080000   2.16306430
  0.18080000   2.16306274
  0.18080000   2.16306130
  0.18080000   2.16305996
  0.18080000   2.16305871
  0.18080000   2.16305754
  0.18080000   2.16305644
  0.18080000   2.16305540
  0.18080000   2.16305443
  0.18080000   2.16305351
  0.18080000   2.16305265
  0.18080000   2.16305183
  0.18080000   2.16305105
  0.18080000   2.16305031
  0.18080000   2.16304961
  0.18100000   2.16412423
  0.18100000   2.16412100
  0.18100000   2.16411810
  0.18100000   2.16411549
  0.18100000   2.16411312
  0.18100000   2.16411095
  0.18100000   2.16410898
  0.18100000   2.16410716
  0.18100000   2.16410548
  0.18100000   2.16410392
  0.18100000   2.16410248
  0.18100000   2.16410114
  0.18100000   2.16409988
  0.18100000   2.16409871
  0.18100000   2.16409761
  0.18100000   2.16409658
  0.18100000   2.16409560
  0.18100000   2.16409469
  0.18100000   2.16409382
  0.18100000   2.16409300
  0.18100000   2.16409222
  0.18100000   2.16409148
  0.18100000   2.16409078
  0.18120000   2.16515790
  0.18120000   2.16515468
  0.18120000   2.16515178
  0.18120000   2.16514917
  0.18120000   2.16514680
  0.18120000   2.16514463
  0.18120000   2.16514266
  0.18120000   2.16514084
  0.18120000   2.16513916
  0.18120000   2.16513760
  0.18120000   2.16513616
  0.18120000   2.16513482
  0.18120000   2.16513356
  0.18120000   2.16513239
  0.18120000   2.16513129
  0.18120000   2.16513025
  0.18120000   2.16512928
  0.18120000   2.16512836
  0.18120000   2.16512749
  0.18120000   2.16512667
  0.18120000   2.16512589
  0.18120000   2.16512515
  0.18120000   2.16512445
  0.18140000   2.16618416
  0.18140000   2.16618094
  0.18140000   2.16617804
  0.18140000   2.16617543
  0.18140000   2.16617306
  0.18140000   2.16617090
  0.18140000   2.16616892
  0.18140000   2.16616710
  0.18140000   2.16616542
  0.18140000   2.16616387
  0.18140000   2.16616242
  0.18140000   2.16616108
  0.18140000   2.16615982
  0.18140000   2.16615865
  0.18140000   2.16615755
  0.18140000   2.16615651
  0.18140000   2.16615554
  0.18140000   2.16615462
  0.18140000   2.16615375
  0.18140000   2.16615293
  0.18140000   2.16615215
  0.18140000   2.16615141
  0.18140000   2.16615070
  0.18160000   2.16720309
  0.18160000   2.16719987
  0.18160000   2.16719698
  0.18160000   2.16719437
  0.18160000   2.16719200
  0.18160000   2.16718984
  0.18160000   2.16718786
  0.18160000   2.16718604
  0.18160000   2.16718436
  0.18160000   2.16718280
  0.18160000   2.16718136
  0.18160000   2.16718001
  0.18160000   2.16717876
  0.18160000   2.16717758
  0.18160000   2.16717648
  0.18160000   2.16717544
  0.18160000   2.16717447
  0.18160000   2.16717355
  0.18160000   2.16717268
  0.18160000   2.16717185
  0.18160000   2.16717107
  0.18160000   2.16717033
  0.18160000   2.16716963
  0.18180000   2.16821477
  0.18180000   2.16821155
  0.18180000   2.16820867
  0.18180000   2.16820606
  0.18180000   2.16820369
  0.18180000   2.16820153
  0.18180000   2.16819955
  0.18180000   2.16819773
  0.18180000   2.16819605
  0.18180000   2.16819449
  0.18180000   2.16819305
  0.18180000   2.16819170
  0.18180000   2.16819045
  0.18180000   2.16818927
  0.18180000   2.16818817
  0.18180000   2.16818713
  0.18180000   2.16818615
  0.18180000   2.16818523
  0.18180000   2.16818436
  0.18180000   2.16818353
  0.18180000   2.16818275
  0.18180000   2.16818201
  0.18180000   2.16818130
  0.18200000   2.16921929
  0.18200000   2.16921607
  0.18200000   2.16921319
  0.18200000   2.16921058
  0.18200000   2.16920822
  0.18200000   2.16920606
  0.18200000   2.16920408
  0.18200000   2.16920226
  0.18200000   2.16920058
  0.18200000   2.16919902
  0.18200000   2.16919757
  0.18200000   2.16919623
  0.18200000   2.16919497
  0.18200000   2.16919379
  0.18200000   2.16919269
  0.18200000   2.16919165
  0.18200000   2.16919067
  0.18200000   2.16918975
  0.18200000   2.16918888
  0.18200000   2.16918805
  0.18200000   2.16918727
  0.18200000   2.16918652
  0.18200000   2.16918582
  0.18220000   2.17021672
  0.18220000   2.17021351
  0.18220000   2.17021063
  0.18220000   2.17020802
  0.18220000   2.17020566
  0.18220000   2.17020350
  0.18220000   2.17020152
  0.18220000   2.17019970
  0.18220000   2.17019801
  0.18220000   2.17019646
  0.18220000   2.17019501
  0.18220000   2.17019366
  0.18220000   2.17019240
  0.18220000   2.17019123
  0.18220000   2.17019012
  0.18220000   2.17018908
  0.18220000   2.17018810
  0.18220000   2.17018718
  0.18220000   2.17018631
  0.18220000   2.17018548
  0.18220000   2.17018469
  0.18220000   2.17018395
  0.18220000   2.17018324
  0.18240000   2.17120714
  0.18240000   2.17120394
  0.18240000   2.17120106
  0.18240000   2.17119845
  0.18240000   2.17119609
  0.18240000   2.17119393
  0.18240000   2.17119195
  0.18240000   2.17119013
  0.18240000   2.17118845
  0.18240000   2.17118689
  0.18240000   2.17118544
  0.18240000   2.17118409
  0.18240000   2.17118283
  0.18240000   2.17118165
  0.18240000   2.17118055
  0.18240000   2.17117951
  0.18240000   2.17117853
  0.18240000   2.17117760
  0.18240000   2.17117673
  0.18240000   2.17117590
  0.18240000   2.17117512
  0.18240000   2.17117437
  0.18240000   2.17117366
  0.18260000   2.17219064
  0.18260000   2.17218744
  0.18260000   2.17218456
  0.18260000   2.17218196
  0.18260000   2.17217959
  0.18260000   2.17217743
  0.18260000   2.17217545
  0.18260000   2.17217363
  0.18260000   2.17217195
  0.18260000   2.17217039
  0.18260000   2.17216894
  0.18260000   2.17216759
  0.18260000   2.17216633
  0.18260000   2.17216515
  0.18260000   2.17216405
  0.18260000   2.17216300
  0.18260000   2.17216202
  0.18260000   2.17216110
  0.18260000   2.17216022
  0.18260000   2.17215939
  0.18260000   2.17215861
  0.18260000   2.17215786
  0.18260000   2.17215715
  0.18280000   2.17316729
  0.18280000   2.17316409
  0.18280000   2.17316121
  0.18280000   2.17315861
  0.18280000   2.17315624
  0.18280000   2.17315409
  0.18280000   2.17315211
  0.18280000   2.17315028
  0.18280000   2.17314860
  0.18280000   2.17314704
  0.18280000   2.17314559
  0.18280000   2.17314424
  0.18280000   2.17314298
  0.18280000   2.17314180
  0.18280000   2.17314069
  0.18280000   2.17313965
  0.18280000   2.17313867
  0.18280000   2.17313774
  0.18280000   2.17313686
  0.18280000   2.17313603
  0.18280000   2.17313525
  0.18280000   2.17313450
  0.18280000   2.17313379
  0.18300000   2.17413715
  0.18300000   2.17413396
  0.18300000   2.17413108
  0.18300000   2.17412848
  0.18300000   2.17412612
  0.18300000   2.17412396
  0.18300000   2.17412198
  0.18300000   2.17412016
  0.18300000   2.17411847
  0.18300000   2.17411691
  0.18300000   2.17411546
  0.18300000   2.17411411
  0.18300000   2.17411285
  0.18300000   2.17411167
  0.18300000   2.17411056
  0.18300000   2.17410952
  0.18300000   2.17410853
  0.18300000   2.17410760
  0.18300000   2.17410673
  0.18300000   2.17410590
  0.18300000   2.17410511
  0.18300000   2.17410436
  0.18300000   2.17410365
  0.18320000   2.17510032
  0.18320000   2.17509712
  0.18320000   2.17509425
  0.18320000   2.17509165
  0.18320000   2.17508929
  0.18320000   2.17508713
  0.18320000   2.17508515
  0.18320000   2.17508333
  0.18320000   2.17508164
  0.18320000   2.17508008
  0.18320000   2.17507863
  0.18320000   2.17507728
  0.18320000   2.17507602
  0.18320000   2.17507483
  0.18320000   2.17507372
  0.18320000   2.17507268
  0.18320000   2.17507169
  0.18320000   2.17507076
  0.18320000   2.17506989
  0.18320000   2.17506905
  0.18320000   2.17506827
  0.18320000   2.17506752
  0.18320000   2.17506680
  0.18340000   2.17605685
  0.18340000   2.17605366
  0.18340000   2.17605079
  0.18340000   2.17604819
  0.18340000   2.17604583
  0.18340000   2.17604367
  0.18340000   2.17604169
  0.18340000   2.17603987
  0.18340000   2.17603818
  0.18340000   2.17603662
  0.18340000   2.17603517
  0.18340000   2.17603381
  0.18340000   2.17603255
  0.18340000   2.17603137
  0.18340000   2.17603025
  0.18340000   2.17602921
  0.18340000   2.17602822
  0.18340000   2.17602729
  0.18340000   2.17602641
  0.18340000   2.17602558
  0.18340000   2.17602479
  0.18340000   2.17602404
  0.18340000   2.17602333
  0.18360000   2.17700683
  0.18360000   2.17700364
  0.18360000   2.17700077
  0.18360000   2.17699817
  0.18360000   2.17699581
  0.18360000   2.17699365
  0.18360000   2.17699167
  0.18360000   2.17698985
  0.18360000   2.17698816
  0.18360000   2.17698660
  0.18360000   2.17698514
  0.18360000   2.17698379
  0.18360000   2.17698253
  0.18360000   2.17698134
  0.18360000   2.17698023
  0.18360000   2.17697918
  0.18360000   2.17697819
  0.18360000   2.17697726
  0.18360000   2.17697638
  0.18360000   2.17697555
  0.18360000   2.17697476
  0.18360000   2.17697401
  0.18360000   2.17697329
  0.18380000   2.17795032
  0.18380000   2.17794713
  0.18380000   2.17794426
  0.18380000   2.17794166
  0.18380000   2.17793930
  0.18380000   2.17793714
  0.18380000   2.17793516
  0.18380000   2.17793334
  0.18380000   2.17793165
  0.18380000   2.17793009
  0.18380000   2.17792863
  0.18380000   2.17792728
  0.18380000   2.17792601
  0.18380000   2.17792483
  0.18380000   2.17792371
  0.18380000   2.17792266
  0.18380000   2.17792168
  0.18380000   2.17792074
  0.18380000   2.17791986
  0.18380000   2.17791903
  0.18380000   2.17791824
  0.18380000   2.17791748
  0.18380000   2.17791677
  0.18400000   2.17888738
  0.18400000   2.17888420
  0.18400000   2.17888133
  0.18400000   2.17887874
  0.18400000   2.17887637
  0.18400000   2.17887421
  0.18400000   2.17887223
  0.18400000   2.17887041
  0.18400000   2.17886872
  0.18400000   2.17886716
  0.18400000   2.17886570
  0.18400000   2.17886435
  0.18400000   2.17886308
  0.18400000   2.17886189
  0.18400000   2.17886078
  0.18400000   2.17885973
  0.18400000   2.17885874
  0.18400000   2.17885781
  0.18400000   2.17885692
  0.18400000   2.17885609
  0.18400000   2.17885529
  0.18400000   2.17885454
  0.18400000   2.17885382
  0.18420000   2.17981810
  0.18420000   2.17981492
  0.18420000   2.17981205
  0.18420000   2.17980946
  0.18420000   2.17980710
  0.18420000   2.17980494
  0.18420000   2.17980296
  0.18420000   2.17980113
  0.18420000   2.17979944
  0.18420000   2.17979788
  0.18420000   2.17979642
  0.18420000   2.17979506
  0.18420000   2.17979380
  0.18420000   2.17979261
  0.18420000   2.17979149
  0.18420000   2.17979044
  0.18420000   2.17978945
  0.18420000   2.17978852
  0.18420000   2.17978763
  0.18420000   2.17978680
  0.18420000   2.17978600
  0.18420000   2.17978525
  0.18420000   2.17978453
  0.18440000   2.18074254
  0.18440000   2.18073936
  0.18440000   2.18073649
  0.18440000   2.18073390
  0.18440000   2.18073154
  0.18440000   2.18072938
  0.18440000   2.18072740
  0.18440000   2.18072557
  0.18440000   2.18072388
  0.18440000   2.18072231
  0.18440000   2.18072086
  0.18440000   2.18071950
  0.18440000   2.18071823
  0.18440000   2.18071704
  0.18440000   2.18071592
  0.18440000   2.18071487
  0.18440000   2.18071388
  0.18440000   2.18071295
  0.18440000   2.18071206
  0.18440000   2.18071122
  0.18440000   2.18071043
  0.18440000   2.18070967
  0.18440000   2.18070895
  0.18460000   2.18166076
  0.18460000   2.18165758
  0.18460000   2.18165472
  0.18460000   2.18165212
  0.18460000   2.18164976
  0.18460000   2.18164760
  0.18460000   2.18164562
  0.18460000   2.18164379
  0.18460000   2.18164210
  0.18460000   2.18164053
  0.18460000   2.18163908
  0.18460000   2.18163772
  0.18460000   2.18163645
  0.18460000   2.18163526
  0.18460000   2.18163414
  0.18460000   2.18163309
  0.18460000   2.18163209
  0.18460000   2.18163116
  0.18460000   2.18163027
  0.18460000   2.18162943
  0.18460000   2.18162864
  0.18460000   2.18162788
  0.18460000   2.18162716
  0.18480000   2.18257283
  0.18480000   2.18256965
  0.18480000   2.18256679
  0.18480000   2.18256419
  0.18480000   2.18256183
  0.18480000   2.18255967
  0.18480000   2.18255769
  0.18480000   2.18255586
  0.18480000   2.18255417
  0.18480000   2.18255260
  0.18480000   2.18255115
  0.18480000   2.18254979
  0.18480000   2.18254851
  0.18480000   2.18254732
  0.18480000   2.18254620
  0.18480000   2.18254515
  0.18480000   2.18254416
  0.18480000   2.18254322
  0.18480000   2.18254233
  0.18480000   2.18254149
  0.18480000   2.18254069
  0.18480000   2.18253994
  0.18480000   2.18253922
  0.18500000   2.18347881
  0.18500000   2.18347564
  0.18500000   2.18347277
  0.18500000   2.18347018
  0.18500000   2.18346782
  0.18500000   2.18346566
  0.18500000   2.18346368
  0.18500000   2.18346185
  0.18500000   2.18346016
  0.18500000   2.18345859
  0.18500000   2.18345713
  0.18500000   2.18345577
  0.18500000   2.18345449
  0.18500000   2.18345330
  0.18500000   2.18345218
  0.18500000   2.18345113
  0.18500000   2.18345013
  0.18500000   2.18344919
  0.18500000   2.18344831
  0.18500000   2.18344746
  0.18500000   2.18344666
  0.18500000   2.18344591
  0.18500000   2.18344518
  0.18520000   2.18437877
  0.18520000   2.18437560
  0.18520000   2.18437274
  0.18520000   2.18437014
  0.18520000   2.18436778
  0.18520000   2.18436562
  0.18520000   2.18436364
  0.18520000   2.18436181
  0.18520000   2.18436012
  0.18520000   2.18435855
  0.18520000   2.18435709
  0.18520000   2.18435572
  0.18520000   2.18435445
  0.18520000   2.18435326
  0.18520000   2.18435213
  0.18520000   2.18435108
  0.18520000   2.18435008
  0.18520000   2.18434914
  0.18520000   2.18434825
  0.18520000   2.18434741
  0.18520000   2.18434661
  0.18520000   2.18434585
  0.18520000   2.18434513
  0.18540000   2.18527277
  0.18540000   2.18526960
  0.18540000   2.18526674
  0.18540000   2.18526415
  0.18540000   2.18526179
  0.18540000   2.18525962
  0.18540000   2.18525764
  0.18540000   2.18525581
  0.18540000   2.18525412
  0.18540000   2.18525255
  0.18540000   2.18525108
  0.18540000   2.18524972
  0.18540000   2.18524845
  0.18540000   2.18524725
  0.18540000   2.18524613
  0.18540000   2.18524507
  0.18540000   2.18524408
  0.18540000   2.18524313
  0.18540000   2.18524224
  0.18540000   2.18524140
  0.18540000   2.18524060
  0.18540000   2.18523984
  0.18540000   2.18523912
  0.18560000   2.18616088
  0.18560000   2.18615771
  0.18560000   2.18615485
  0.18560000   2.18615225
  0.18560000   2.18614989
  0.18560000   2.18614773
  0.18560000   2.18614574
  0.18560000   2.18614391
  0.18560000   2.18614222
  0.18560000   2.18614065
  0.18560000   2.18613918
  0.18560000   2.18613782
  0.18560000   2.18613654
  0.18560000   2.18613535
  0.18560000   2.18613422
  0.18560000   2.18613317
  0.18560000   2.18613217
  0.18560000   2.18613123
  0.18560000   2.18613033
  0.18560000   2.18612949
  0.18560000   2.18612869
  0.18560000   2.18612793
  0.18560000   2.18612720
  0.18580000   2.18704314
  0.18580000   2.18703997
  0.18580000   2.18703711
  0.18580000   2.18703452
  0.18580000   2.18703216
  0.18580000   2.18703000
  0.18580000   2.18702801
  0.18580000   2.18702618
  0.18580000   2.18702448
  0.18580000   2.18702291
  0.18580000   2.18702145
  0.18580000   2.18702008
  0.18580000   2.18701880
  0.18580000   2.18701761
  0.18580000   2.18701648
  0.18580000   2.18701542
  0.18580000   2.18701442
  0.18580000   2.18701348
  0.18580000   2.18701259
  0.18580000   2.18701174
  0.18580000   2.18701094
  0.18580000   2.18701018
  0.18580000   2.18700945
  0.18600000   2.18791963
  0.18600000   2.18791646
  0.18600000   2.18791360
  0.18600000   2.18791101
  0.18600000   2.18790865
  0.18600000   2.18790648
  0.18600000   2.18790450
  0.18600000   2.18790266
  0.18600000   2.18790097
  0.18600000   2.18789940
  0.18600000   2.18789793
  0.18600000   2.18789656
  0.18600000   2.18789528
  0.18600000   2.18789409
  0.18600000   2.18789296
  0.18600000   2.18789190
  0.18600000   2.18789090
  0.18600000   2.18788996
  0.18600000   2.18788906
  0.18600000   2.18788821
  0.18600000   2.18788741
  0.18600000   2.18788665
  0.18600000   2.18788592
  0.18620000   2.18879040
  0.18620000   2.18878723
  0.18620000   2.18878437
  0.18620000   2.18878178
  0.18620000   2.18877942
  0.18620000   2.18877725
  0.18620000   2.18877527
  0.18620000   2.18877343
  0.18620000   2.18877174
  0.18620000   2.18877016
  0.18620000   2.18876869
  0.18620000   2.18876733
  0.18620000   2.18876605
  0.18620000   2.18876485
  0.18620000   2.18876372
  0.18620000   2.18876266
  0.18620000   2.18876166
  0.18620000   2.18876071
  0.18620000   2.18875982
  0.18620000   2.18875897
  0.18620000   2.18875816
  0.18620000   2.18875740
  0.18620000   2.18875667
  0.18640000   2.18965551
  0.18640000   2.18965234
  0.18640000   2.18964948
  0.18640000   2.18964689
  0.18640000   2.18964453
  0.18640000   2.18964236
  0.18640000   2.18964037
  0.18640000   2.18963854
  0.18640000   2.18963684
  0.18640000   2.18963527
  0.18640000   2.18963380
  0.18640000   2.18963243
  0.18640000   2.18963115
  0.18640000   2.18962995
  0.18640000   2.18962882
  0.18640000   2.18962776
  0.18640000   2.18962676
  0.18640000   2.18962581
  0.18640000   2.18962491
  0.18640000   2.18962406
  0.18640000   2.18962326
  0.18640000   2.18962249
  0.18640000   2.18962176
  0.18660000   2.19051501
  0.18660000   2.19051185
  0.18660000   2.19050899
  0.18660000   2.19050640
  0.18660000   2.19050403
  0.18660000   2.19050187
  0.18660000   2.19049988
  0.18660000   2.19049805
  0.18660000   2.19049635
  0.18660000   2.19049477
  0.18660000   2.19049330
  0.18660000   2.19049193
  0.18660000   2.19049065
  0.18660000   2.19048945
  0.18660000   2.19048832
  0.18660000   2.19048725
  0.18660000   2.19048625
  0.18660000   2.19048530
  0.18660000   2.19048441
  0.18660000   2.19048355
  0.18660000   2.19048275
  0.18660000   2.19048198
  0.18660000   2.19048125
  0.18680000   2.19136897
  0.18680000   2.19136581
  0.18680000   2.19136295
  0.18680000   2.19136036
  0.18680000   2.19135799
  0.18680000   2.19135583
  0.18680000   2.19135384
  0.18680000   2.19135200
  0.18680000   2.19135030
  0.18680000   2.19134872
  0.18680000   2.19134726
  0.18680000   2.19134588
  0.18680000   2.19134460
  0.18680000   2.19134340
  0.18680000   2.19134227
  0.18680000   2.19134120
  0.18680000   2.19134020
  0.18680000   2.19133925
  0.18680000   2.19133835
  0.18680000   2.19133750
  0.18680000   2.19133669
  0.18680000   2.19133592
  0.18680000   2.19133519
  0.18700000   2.19221744
  0.18700000   2.19221428
  0.18700000   2.19221142
  0.18700000   2.19220883
  0.18700000   2.19220646
  0.18700000   2.19220430
  0.18700000   2.19220231
  0.18700000   2.19220047
  0.18700000   2.19219877
  0.18700000   2.19219719
  0.18700000   2.19219572
  0.18700000   2.19219435
  0.18700000   2.19219306
  0.18700000   2.19219186
  0.18700000   2.19219072
  0.18700000   2.19218966
  0.18700000   2.19218865
  0.18700000   2.19218770
  0.18700000   2.19218680
  0.18700000   2.19218595
  0.18700000   2.19218514
  0.18700000   2.19218437
  0.18700000   2.19218364
  0.18720000   2.19306047
  0.18720000   2.19305731
  0.18720000   2.19305446
  0.18720000   2.19305186
  0.18720000   2.19304950
  0.18720000   2.19304733
  0.18720000   2.19304534
  0.18720000   2.19304350
  0.18720000   2.19304180
  0.18720000   2.19304022
  0.18720000   2.19303875
  0.18720000   2.19303737
  0.18720000   2.19303609
  0.18720000   2.19303488
  0.18720000   2.19303375
  0.18720000   2.19303268
  0.18720000   2.19303167
  0.18720000   2.19303072
  0.18720000   2.19302982
  0.18720000   2.19302897
  0.18720000   2.19302816
  0.18720000   2.19302739
  0.18720000   2.19302665
  0.18740000   2.19389813
  0.18740000   2.19389496
  0.18740000   2.19389211
  0.18740000   2.19388952
  0.18740000   2.19388715
  0.18740000   2.19388498
  0.18740000   2.19388299
  0.18740000   2.19388115
  0.18740000   2.19387945
  0.18740000   2.19387787
  0.18740000   2.19387639
  0.18740000   2.19387502
  0.18740000   2.19387373
  0.18740000   2.19387252
  0.18740000   2.19387139
  0.18740000   2.19387032
  0.18740000   2.19386931
  0.18740000   2.19386836
  0.18740000   2.19386746
  0.18740000   2.19386660
  0.18740000   2.19386579
  0.18740000   2.19386502
  0.18740000   2.19386429
  0.18760000   2.19473045
  0.18760000   2.19472729
  0.18760000   2.19472443
  0.18760000   2.19472184
  0.18760000   2.19471947
  0.18760000   2.19471731
  0.18760000   2.19471531
  0.18760000   2.19471347
  0.18760000   2.19471177
  0.18760000   2.19471019
  0.18760000   2.19470871
  0.18760000   2.19470733
  0.18760000   2.19470605
  0.18760000   2.19470484
  0.18760000   2.19470370
  0.18760000   2.19470263
  0.18760000   2.19470162
  0.18760000   2.19470067
  0.18760000   2.19469977
  0.18760000   2.19469891
  0.18760000   2.19469810
  0.18760000   2.19469733
  0.18760000   2.19469659
  0.18780000   2.19555750
  0.18780000   2.19555434
  0.18780000   2.19555148
  0.18780000   2.19554889
  0.18780000   2.19554652
  0.18780000   2.19554436
  0.18780000   2.19554236
  0.18780000   2.19554052
  0.18780000   2.19553881
  0.18780000   2.19553723
  0.18780000   2.19553575
  0.18780000   2.19553438
  0.18780000   2.19553309
  0.18780000   2.19553188
  0.18780000   2.19553074
  0.18780000   2.19552967
  0.18780000   2.19552866
  0.18780000   2.19552770
  0.18780000   2.19552680
  0.18780000   2.19552594
  0.18780000   2.19552513
  0.18780000   2.19552436
  0.18780000   2.19552362
  0.18800000   2.19637932
  0.18800000   2.19637616
  0.18800000   2.19637331
  0.18800000   2.19637072
  0.18800000   2.19636835
  0.18800000   2.19636618
  0.18800000   2.19636418
  0.18800000   2.19636234
  0.18800000   2.19636063
  0.18800000   2.19635905
  0.18800000   2.19635757
  0.18800000   2.19635619
  0.18800000   2.19635490
  0.18800000   2.19635369
  0.18800000   2.19635255
  0.18800000   2.19635148
  0.18800000   2.19635047
  0.18800000   2.19634951
  0.18800000   2.19634861
  0.18800000   2.19634775
  0.18800000   2.19634694
  0.18800000   2.19634616
  0.18800000   2.19634542
  0.18820000   2.19719598
  0.18820000   2.19719282
  0.18820000   2.19718996
  0.18820000   2.19718737
  0.18820000   2.19718500
  0.18820000   2.19718283
  0.18820000   2.19718083
  0.18820000   2.19717899
  0.18820000   2.19717728
  0.18820000   2.19717570
  0.18820000   2.19717422
  0.18820000   2.19717284
  0.18820000   2.19717155
  0.18820000   2.19717033
  0.18820000   2.19716919
  0.18820000   2.19716812
  0.18820000   2.19716711
  0.18820000   2.19716615
  0.18820000   2.19716524
  0.18820000   2.19716439
  0.18820000   2.19716357
  0.18820000   2.19716279
  0.18820000   2.19716206
  0.18840000   2.19800751
  0.18840000   2.19800435
  0.18840000   2.19800150
  0.18840000   2.19799890
  0.18840000   2.19799653
  0.18840000   2.19799436
  0.18840000   2.19799236
  0.18840000   2.19799052
  0.18840000   2.19798881
  0.18840000   2.19798722
  0.18840000   2.19798574
  0.18840000   2.19798436
  0.18840000   2.19798307
  0.18840000   2.19798185
  0.18840000   2.19798071
  0.18840000   2.19797964
  0.18840000   2.19797862
  0.18840000   2.19797767
  0.18840000   2.19797676
  0.18840000   2.19797590
  0.18840000   2.19797508
  0.18840000   2.19797430
  0.18840000   2.19797356
  0.18860000   2.19881397
  0.18860000   2.19881081
  0.18860000   2.19880796
  0.18860000   2.19880536
  0.18860000   2.19880299
  0.18860000   2.19880082
  0.18860000   2.19879882
  0.18860000   2.19879698
  0.18860000   2.19879526
  0.18860000   2.19879368
  0.18860000   2.19879220
  0.18860000   2.19879081
  0.18860000   2.19878952
  0.18860000   2.19878830
  0.18860000   2.19878716
  0.18860000   2.19878609
  0.18860000   2.19878507
  0.18860000   2.19878411
  0.18860000   2.19878320
  0.18860000   2.19878234
  0.18860000   2.19878152
  0.18860000   2.19878074
  0.18860000   2.19878000
  0.18880000   2.19961541
  0.18880000   2.19961225
  0.18880000   2.19960940
  0.18880000   2.19960680
  0.18880000   2.19960443
  0.18880000   2.19960226
  0.18880000   2.19960026
  0.18880000   2.19959841
  0.18880000   2.19959670
  0.18880000   2.19959511
  0.18880000   2.19959362
  0.18880000   2.19959224
  0.18880000   2.19959094
  0.18880000   2.19958973
  0.18880000   2.19958859
  0.18880000   2.19958751
  0.18880000   2.19958649
  0.18880000   2.19958553
  0.18880000   2.19958462
  0.18880000   2.19958376
  0.18880000   2.19958294
  0.18880000   2.19958216
  0.18880000   2.19958142
  0.18900000   2.20041187
  0.18900000   2.20040872
  0.18900000   2.20040586
  0.18900000   2.20040326
  0.18900000   2.20040089
  0.18900000   2.20039872
  0.18900000   2.20039672
  0.18900000   2.20039487
  0.18900000   2.20039316
  0.18900000   2.20039156
  0.18900000   2.20039008
  0.18900000   2.20038870
  0.18900000   2.20038740
  0.18900000   2.20038618
  0.18900000   2.20038504
  0.18900000   2.20038396
  0.18900000   2.20038294
  0.18900000   2.20038198
  0.18900000   2.20038107
  0.18900000   2.20038020
  0.18900000   2.20037938
  0.18900000   2.20037860
  0.18900000   2.20037786
  0.18920000   2.20120341
  0.18920000   2.20120025
  0.18920000   2.20119740
  0.18920000   2.20119480
  0.18920000   2.20119243
  0.18920000   2.20119025
  0.18920000   2.20118825
  0.18920000   2.20118640
  0.18920000   2.20118469
  0.18920000   2.20118309
  0.18920000   2.20118161
  0.18920000   2.20118022
  0.18920000   2.20117892
  0.18920000   2.20117771
  0.18920000   2.20117656
  0.18920000   2.20117548
  0.18920000   2.20117446
  0.18920000   2.20117350
  0.18920000   2.20117259
  0.18920000   2.20117172
  0.18920000   2.20117090
  0.18920000   2.20117012
  0.18920000   2.20116938
  0.18940000   2.20199007
  0.18940000   2.20198691
  0.18940000   2.20198406
  0.18940000   2.20198146
  0.18940000   2.20197909
  0.18940000   2.20197691
  0.18940000   2.20197491
  0.18940000   2.20197306
  0.18940000   2.20197134
  0.18940000   2.20196975
  0.18940000   2.20196826
  0.18940000   2.20196687
  0.18940000   2.20196557
  0.18940000   2.20196435
  0.18940000   2.20196321
  0.18940000   2.20196212
  0.18940000   2.20196110
  0.18940000   2.20196014
  0.18940000   2.20195923
  0.18940000   2.20195836
  0.18940000   2.20195754
  0.18940000   2.20195676
  0.18940000   2.20195601
  0.18960000   2.20277190
  0.18960000   2.20276874
  0.18960000   2.20276588
  0.18960000   2.20276329
  0.18960000   2.20276091
  0.18960000   2.20275873
  0.18960000   2.20275673
  0.18960000   2.20275488
  0.18960000   2.20275316
  0.18960000   2.20275157
  0.18960000   2.20275008
  0.18960000   2.20274869
  0.18960000   2.20274739
  0.18960000   2.20274617
  0.18960000   2.20274502
  0.18960000   2.20274394
  0.18960000   2.20274291
  0.18960000   2.20274195
  0.18960000   2.20274103
  0.18960000   2.20274017
  0.18960000   2.20273934
  0.18960000   2.20273856
  0.18960000   2.20273781
  0.18980000   2.20354894
  0.18980000   2.20354578
  0.18980000   2.20354292
  0.18980000   2.20354032
  0.18980000   2.20353795
  0.18980000   2.20353577
  0.18980000   2.20353377
  0.18980000   2.20353191
  0.18980000   2.20353019
  0.18980000   2.20352860
  0.18980000   2.20352711
  0.18980000   2.20352572
  0.18980000   2.20352442
  0.18980000   2.20352319
  0.18980000   2.20352204
  0.18980000   2.20352096
  0.18980000   2.20351994
  0.18980000   2.20351897
  0.18980000   2.20351805
  0.18980000   2.20351719
  0.18980000   2.20351636
  0.18980000   2.20351558
  0.18980000   2.20351483
  0.19000000   2.20432124
  0.19000000   2.20431808
  0.19000000   2.20431522
  0.19000000   2.20431262
  0.19000000   2.20431025
  0.19000000   2.20430807
  0.19000000   2.20430606
  0.19000000   2.20430421
  0.19000000   2.20430249
  0.19000000   2.20430089
  0.19000000   2.20429940
  0.19000000   2.20429801
  0.19000000   2.20429670
  0.19000000   2.20429548
  0.19000000   2.20429433
  0.19000000   2.20429324
  0.19000000   2.20429222
  0.19000000   2.20429125
  0.19000000   2.20429033
  0.19000000   2.20428946
  0.19000000   2.20428864
  0.19000000   2.20428785
  0.19000000   2.20428710
  0.19020000   2.20508884
  0.19020000   2.20508568
  0.19020000   2.20508282
  0.19020000   2.20508022
  0.19020000   2.20507785
  0.19020000   2.20507567
  0.19020000   2.20507366
  0.19020000   2.20507180
  0.19020000   2.20507008
  0.19020000   2.20506848
  0.19020000   2.20506699
  0.19020000   2.20506560
  0.19020000   2.20506429
  0.19020000   2.20506307
  0.19020000   2.20506192
  0.19020000   2.20506083
  0.19020000   2.20505980
  0.19020000   2.20505884
  0.19020000   2.20505792
  0.19020000   2.20505705
  0.19020000   2.20505622
  0.19020000   2.20505543
  0.19020000   2.20505468
  0.19040000   2.20585179
  0.19040000   2.20584863
  0.19040000   2.20584578
  0.19040000   2.20584317
  0.19040000   2.20584080
  0.19040000   2.20583861
  0.19040000   2.20583661
  0.19040000   2.20583475
  0.19040000   2.20583303
  0.19040000   2.20583142
  0.19040000   2.20582993
  0.19040000   2.20582854
  0.19040000   2.20582723
  0.19040000   2.20582600
  0.19040000   2.20582485
  0.19040000   2.20582376
  0.19040000   2.20582274
  0.19040000   2.20582177
  0.19040000   2.20582085
  0.19040000   2.20581997
  0.19040000   2.20581915
  0.19040000   2.20581836
  0.19040000   2.20581761
  0.19060000   2.20661013
  0.19060000   2.20660698
  0.19060000   2.20660412
  0.19060000   2.20660151
  0.19060000   2.20659914
  0.19060000   2.20659695
  0.19060000   2.20659494
  0.19060000   2.20659308
  0.19060000   2.20659136
  0.19060000   2.20658976
  0.19060000   2.20658826
  0.19060000   2.20658687
  0.19060000   2.20658556
  0.19060000   2.20658433
  0.19060000   2.20658318
  0.19060000   2.20658209
  0.19060000   2.20658106
  0.19060000   2.20658009
  0.19060000   2.20657917
  0.19060000   2.20657830
  0.19060000   2.20657747
  0.19060000   2.20657668
  0.19060000   2.20657593
  0.19080000   2.20736391
  0.19080000   2.20736075
  0.19080000   2.20735789
  0.19080000   2.20735529
  0.19080000   2.20735291
  0.19080000   2.20735073
  0.19080000   2.20734871
  0.19080000   2.20734685
  0.19080000   2.20734513
  0.19080000   2.20734353
  0.19080000   2.20734203
  0.19080000   2.20734063
  0.19080000   2.20733932
  0.19080000   2.20733809
  0.19080000   2.20733694
  0.19080000   2.20733585
  0.19080000   2.20733482
  0.19080000   2.20733385
  0.19080000   2.20733292
  0.19080000   2.20733205
  0.19080000   2.20733122
  0.19080000   2.20733043
  0.19080000   2.20732968
  0.19100000   2.20811316
  0.19100000   2.20811001
  0.19100000   2.20810715
  0.19100000   2.20810454
  0.19100000   2.20810216
  0.19100000   2.20809998
  0.19100000   2.20809796
  0.19100000   2.20809610
  0.19100000   2.20809438
  0.19100000   2.20809277
  0.19100000   2.20809127
  0.19100000   2.20808987
  0.19100000   2.20808856
  0.19100000   2.20808733
  0.19100000   2.20808618
  0.19100000   2.20808508
  0.19100000   2.20808405
  0.19100000   2.20808308
  0.19100000   2.20808216
  0.19100000   2.20808128
  0.19100000   2.20808045
  0.19100000   2.20807966
  0.19100000   2.20807890
  0.19120000   2.20885794
  0.19120000   2.20885478
  0.19120000   2.20885192
  0.19120000   2.20884931
  0.19120000   2.20884693
  0.19120000   2.20884474
  0.19120000   2.20884273
  0.19120000   2.20884087
  0.19120000   2.20883914
  0.19120000   2.20883753
  0.19120000   2.20883603
  0.19120000   2.20883463
  0.19120000   2.20883332
  0.19120000   2.20883209
  0.19120000   2.20883093
  0.19120000   2.20882984
  0.19120000   2.20882881
  0.19120000   2.20882783
  0.19120000   2.20882691
  0.19120000   2.20882603
  0.19120000   2.20882520
  0.19120000   2.20882440
  0.19120000   2.20882365
  0.19140000   2.20959827
  0.19140000   2.20959511
  0.19140000   2.20959225
  0.19140000   2.20958964
  0.19140000   2.20958726
  0.19140000   2.20958507
  0.19140000   2.20958306
  0.19140000   2.20958119
  0.19140000   2.20957946
  0.19140000   2.20957785
  0.19140000   2.20957636
  0.19140000   2.20957495
  0.19140000   2.20957364
  0.19140000   2.20957241
  0.19140000   2.20957125
  0.19140000   2.20957015
  0.19140000   2.20956912
  0.19140000   2.20956814
  0.19140000   2.20956722
  0.19140000   2.20956634
  0.19140000   2.20956551
  0.19140000   2.20956471
  0.19140000   2.20956396
  0.19160000   2.21033420
  0.19160000   2.21033104
  0.19160000   2.21032818
  0.19160000   2.21032557
  0.19160000   2.21032319
  0.19160000   2.21032100
  0.19160000   2.21031898
  0.19160000   2.21031712
  0.19160000   2.21031539
  0.19160000   2.21031378
  0.19160000   2.21031228
  0.19160000   2.21031087
  0.19160000   2.21030956
  0.19160000   2.21030832
  0.19160000   2.21030716
  0.19160000   2.21030607
  0.19160000   2.21030503
  0.19160000   2.21030406
  0.19160000   2.21030313
  0.19160000   2.21030225
  0.19160000   2.21030141
  0.19160000   2.21030062
  0.19160000   2.21029986
  0.19180000   2.21106578
  0.19180000   2.21106262
  0.19180000   2.21105975
  0.19180000   2.21105715
  0.19180000   2.21105476
  0.19180000   2.21105257
  0.19180000   2.21105055
  0.19180000   2.21104868
  0.19180000   2.21104695
  0.19180000   2.21104534
  0.19180000   2.21104384
  0.19180000   2.21104243
  0.19180000   2.21104112
  0.19180000   2.21103988
  0.19180000   2.21103872
  0.19180000   2.21103762
  0.19180000   2.21103659
  0.19180000   2.21103561
  0.19180000   2.21103468
  0.19180000   2.21103380
  0.19180000   2.21103296
  0.19180000   2.21103217
  0.19180000   2.21103141
  0.19200000   2.21179303
  0.19200000   2.21178987
  0.19200000   2.21178701
  0.19200000   2.21178440
  0.19200000   2.21178201
  0.19200000   2.21177982
  0.19200000   2.21177780
  0.19200000   2.21177593
  0.19200000   2.21177420
  0.19200000   2.21177259
  0.19200000   2.21177108
  0.19200000   2.21176968
  0.19200000   2.21176836
  0.19200000   2.21176712
  0.19200000   2.21176596
  0.19200000   2.21176486
  0.19200000   2.21176382
  0.19200000   2.21176284
  0.19200000   2.21176191
  0.19200000   2.21176103
  0.19200000   2.21176019
  0.19200000   2.21175940
  0.19200000   2.21175864
  0.19220000   2.21251601
  0.19220000   2.21251285
  0.19220000   2.21250998
  0.19220000   2.21250737
  0.19220000   2.21250498
  0.19220000   2.21250279
  0.19220000   2.21250077
  0.19220000   2.21249890
  0.19220000   2.21249716
  0.19220000   2.21249555
  0.19220000   2.21249405
  0.19220000   2.21249264
  0.19220000   2.21249132
  0.19220000   2.21249008
  0.19220000   2.21248892
  0.19220000   2.21248782
  0.19220000   2.21248678
  0.19220000   2.21248580
  0.19220000   2.21248487
  0.19220000   2.21248398
  0.19220000   2.21248314
  0.19220000   2.21248235
  0.19220000   2.21248159
  0.19240000   2.21323474
  0.19240000   2.21323158
  0.19240000   2.21322871
  0.19240000   2.21322610
  0.19240000   2.21322371
  0.19240000   2.21322152
  0.19240000   2.21321950
  0.19240000   2.21321763
  0.19240000   2.21321589
  0.19240000   2.21321427
  0.19240000   2.21321277
  0.19240000   2.21321136
  0.19240000   2.21321004
  0.19240000   2.21320880
  0.19240000   2.21320763
  0.19240000   2.21320653
  0.19240000   2.21320549
  0.19240000   2.21320451
  0.19240000   2.21320358
  0.19240000   2.21320269
  0.19240000   2.21320185
  0.19240000   2.21320105
  0.19240000   2.21320029
  0.19260000   2.21394927
  0.19260000   2.21394611
  0.19260000   2.21394324
  0.19260000   2.21394063
  0.19260000   2.21393824
  0.19260000   2.21393605
  0.19260000   2.21393402
  0.19260000   2.21393215
  0.19260000   2.21393041
  0.19260000   2.21392880
  0.19260000   2.21392729
  0.19260000   2.21392588
  0.19260000   2.21392456
  0.19260000   2.21392331
  0.19260000   2.21392215
  0.19260000   2.21392104
  0.19260000   2.21392000
  0.19260000   2.21391902
  0.19260000   2.21391809
  0.19260000   2.21391720
  0.19260000   2.21391636
  0.19260000   2.21391556
  0.19260000   2.21391480
  0.19280000   2.21465964
  0.19280000   2.21465648
  0.19280000   2.21465361
  0.19280000   2.21465100
  0.19280000   2.21464860
  0.19280000   2.21464641
  0.19280000   2.21464438
  0.19280000   2.21464251
  0.19280000   2.21464077
  0.19280000   2.21463915
  0.19280000   2.21463764
  0.19280000   2.21463623
  0.19280000   2.21463491
  0.19280000   2.21463366
  0.19280000   2.21463249
  0.19280000   2.21463139
  0.19280000   2.21463035
  0.19280000   2.21462936
  0.19280000   2.21462843
  0.19280000   2.21462754
  0.19280000   2.21462670
  0.19280000   2.21462590
  0.19280000   2.21462514
  0.19300000   2.21536588
  0.19300000   2.21536271
  0.19300000   2.21535985
  0.19300000   2.21535723
  0.19300000   2.21535484
  0.19300000   2.21535264
  0.19300000   2.21535061
  0.19300000   2.21534874
  0.19300000   2.21534700
  0.19300000   2.21534538
  0.19300000   2.21534387
  0.19300000   2.21534245
  0.19300000   2.21534113
  0.19300000   2.21533988
  0.19300000   2.21533871
  0.19300000   2.21533761
  0.19300000   2.21533657
  0.19300000   2.21533558
  0.19300000   2.21533464
  0.19300000   2.21533376
  0.19300000   2.21533291
  0.19300000   2.21533211
  0.19300000   2.21533135
  0.19320000   2.21606803
  0.19320000   2.21606486
  0.19320000   2.21606199
  0.19320000   2.21605938
  0.19320000   2.21605698
  0.19320000   2.21605478
  0.19320000   2.21605275
  0.19320000   2.21605088
  0.19320000   2.21604914
  0.19320000   2.21604751
  0.19320000   2.21604600
  0.19320000   2.21604459
  0.19320000   2.21604326
  0.19320000   2.21604202
  0.19320000   2.21604084
  0.19320000   2.21603974
  0.19320000   2.21603869
  0.19320000   2.21603770
  0.19320000   2.21603677
  0.19320000   2.21603588
  0.19320000   2.21603503
  0.19320000   2.21603423
  0.19320000   2.21603347
  0.19340000   2.21676612
  0.19340000   2.21676296
  0.19340000   2.21676008
  0.19340000   2.21675747
  0.19340000   2.21675507
  0.19340000   2.21675287
  0.19340000   2.21675084
  0.19340000   2.21674896
  0.19340000   2.21674722
  0.19340000   2.21674560
  0.19340000   2.21674408
  0.19340000   2.21674267
  0.19340000   2.21674134
  0.19340000   2.21674009
  0.19340000   2.21673892
  0.19340000   2.21673781
  0.19340000   2.21673676
  0.19340000   2.21673578
  0.19340000   2.21673484
  0.19340000   2.21673395
  0.19340000   2.21673310
  0.19340000   2.21673230
  0.19340000   2.21673153
  0.19360000   2.21746019
  0.19360000   2.21745703
  0.19360000   2.21745416
  0.19360000   2.21745154
  0.19360000   2.21744914
  0.19360000   2.21744694
  0.19360000   2.21744491
  0.19360000   2.21744303
  0.19360000   2.21744128
  0.19360000   2.21743966
  0.19360000   2.21743814
  0.19360000   2.21743673
  0.19360000   2.21743540
  0.19360000   2.21743415
  0.19360000   2.21743297
  0.19360000   2.21743187
  0.19360000   2.21743082
  0.19360000   2.21742983
  0.19360000   2.21742889
  0.19360000   2.21742800
  0.19360000   2.21742715
  0.19360000   2.21742634
  0.19360000   2.21742558
  0.19380000   2.21815029
  0.19380000   2.21814712
  0.19380000   2.21814425
  0.19380000   2.21814163
  0.19380000   2.21813923
  0.19380000   2.21813703
  0.19380000   2.21813499
  0.19380000   2.21813311
  0.19380000   2.21813137
  0.19380000   2.21812974
  0.19380000   2.21812822
  0.19380000   2.21812680
  0.19380000   2.21812547
  0.19380000   2.21812422
  0.19380000   2.21812305
  0.19380000   2.21812194
  0.19380000   2.21812089
  0.19380000   2.21811990
  0.19380000   2.21811896
  0.19380000   2.21811806
  0.19380000   2.21811722
  0.19380000   2.21811641
  0.19380000   2.21811564
  0.19400000   2.21883643
  0.19400000   2.21883326
  0.19400000   2.21883039
  0.19400000   2.21882777
  0.19400000   2.21882537
  0.19400000   2.21882317
  0.19400000   2.21882113
  0.19400000   2.21881925
  0.19400000   2.21881750
  0.19400000   2.21881587
  0.19400000   2.21881435
  0.19400000   2.21881293
  0.19400000   2.21881160
  0.19400000   2.21881035
  0.19400000   2.21880917
  0.19400000   2.21880806
  0.19400000   2.21880701
  0.19400000   2.21880602
  0.19400000   2.21880508
  0.19400000   2.21880418
  0.19400000   2.21880333
  0.19400000   2.21880252
  0.19400000   2.21880176
  0.19420000   2.21951866
  0.19420000   2.21951549
  0.19420000   2.21951262
  0.19420000   2.21951000
  0.19420000   2.21950760
  0.19420000   2.21950539
  0.19420000   2.21950335
  0.19420000   2.21950147
  0.19420000   2.21949972
  0.19420000   2.21949809
  0.19420000   2.21949657
  0.19420000   2.21949515
  0.19420000   2.21949381
  0.19420000   2.21949256
  0.19420000   2.21949138
  0.19420000   2.21949027
  0.19420000   2.21948922
  0.19420000   2.21948822
  0.19420000   2.21948728
  0.19420000   2.21948639
  0.19420000   2.21948554
  0.19420000   2.21948473
  0.19420000   2.21948396
  0.19440000   2.22019701
  0.19440000   2.22019385
  0.19440000   2.22019097
  0.19440000   2.22018835
  0.19440000   2.22018594
  0.19440000   2.22018374
  0.19440000   2.22018170
  0.19440000   2.22017981
  0.19440000   2.22017806
  0.19440000   2.22017643
  0.19440000   2.22017491
  0.19440000   2.22017348
  0.19440000   2.22017215
  0.19440000   2.22017089
  0.19440000   2.22016971
  0.19440000   2.22016860
  0.19440000   2.22016755
  0.19440000   2.22016655
  0.19440000   2.22016561
  0.19440000   2.22016471
  0.19440000   2.22016386
  0.19440000   2.22016305
  0.19440000   2.22016228
  0.19460000   2.22087152
  0.19460000   2.22086835
  0.19460000   2.22086547
  0.19460000   2.22086285
  0.19460000   2.22086044
  0.19460000   2.22085824
  0.19460000   2.22085620
  0.19460000   2.22085431
  0.19460000   2.22085256
  0.19460000   2.22085092
  0.19460000   2.22084940
  0.19460000   2.22084797
  0.19460000   2.22084664
  0.19460000   2.22084538
  0.19460000   2.22084420
  0.19460000   2.22084308
  0.19460000   2.22084203
  0.19460000   2.22084103
  0.19460000   2.22084009
  0.19460000   2.22083919
  0.19460000   2.22083834
  0.19460000   2.22083753
  0.19460000   2.22083675
  0.19480000   2.22154222
  0.19480000   2.22153904
  0.19480000   2.22153617
  0.19480000   2.22153354
  0.19480000   2.22153114
  0.19480000   2.22152892
  0.19480000   2.22152688
  0.19480000   2.22152499
  0.19480000   2.22152324
  0.19480000   2.22152160
  0.19480000   2.22152008
  0.19480000   2.22151865
  0.19480000   2.22151732
  0.19480000   2.22151606
  0.19480000   2.22151487
  0.19480000   2.22151376
  0.19480000   2.22151270
  0.19480000   2.22151170
  0.19480000   2.22151076
  0.19480000   2.22150986
  0.19480000   2.22150901
  0.19480000   2.22150819
  0.19480000   2.22150742
  0.19500000   2.22220913
  0.19500000   2.22220596
  0.19500000   2.22220308
  0.19500000   2.22220045
  0.19500000   2.22219805
  0.19500000   2.22219583
  0.19500000   2.22219379
  0.19500000   2.22219190
  0.19500000   2.22219014
  0.19500000   2.22218851
  0.19500000   2.22218698
  0.19500000   2.22218555
  0.19500000   2.22218421
  0.19500000   2.22218296
  0.19500000   2.22218177
  0.19500000   2.22218065
  0.19500000   2.22217960
  0.19500000   2.22217860
  0.19500000   2.22217765
  0.19500000   2.22217675
  0.19500000   2.22217589
  0.19500000   2.22217508
  0.19500000   2.22217431
  0.19520000   2.22287230
  0.19520000   2.22286913
  0.19520000   2.22286625
  0.19520000   2.22286362
  0.19520000   2.22286121
  0.19520000   2.22285899
  0.19520000   2.22285695
  0.19520000   2.22285506
  0.19520000   2.22285330
  0.19520000   2.22285166
  0.19520000   2.22285014
  0.19520000   2.22284871
  0.19520000   2.22284737
  0.19520000   2.22284611
  0.19520000   2.22284492
  0.19520000   2.22284380
  0.19520000   2.22284274
  0.19520000   2.22284174
  0.19520000   2.22284079
  0.19520000   2.22283989
  0.19520000   2.22283904
  0.19520000   2.22283822
  0.19520000   2.22283744
  0.19540000   2.22353176
  0.19540000   2.22352858
  0.19540000   2.22352570
  0.19540000   2.22352307
  0.19540000   2.22352066
  0.19540000   2.22351844
  0.19540000   2.22351640
  0.19540000   2.22351450
  0.19540000   2.22351274
  0.19540000   2.22351111
  0.19540000   2.22350958
  0.19540000   2.22350814
  0.19540000   2.22350680
  0.19540000   2.22350554
  0.19540000   2.22350435
  0.19540000   2.22350323
  0.19540000   2.22350217
  0.19540000   2.22350117
  0.19540000   2.22350022
  0.19540000   2.22349932
  0.19540000   2.22349846
  0.19540000   2.22349765
  0.19540000   2.22349687
  0.19560000   2.22418753
  0.19560000   2.22418435
  0.19560000   2.22418147
  0.19560000   2.22417884
  0.19560000   2.22417643
  0.19560000   2.22417421
  0.19560000   2.22417216
  0.19560000   2.22417027
  0.19560000   2.22416850
  0.19560000   2.22416686
  0.19560000   2.22416533
  0.19560000   2.22416390
  0.19560000   2.22416256
  0.19560000   2.22416129
  0.19560000   2.22416011
  0.19560000   2.22415898
  0.19560000   2.22415792
  0.19560000   2.22415692
  0.19560000   2.22415597
  0.19560000   2.22415506
  0.19560000   2.22415421
  0.19560000   2.22415339
  0.19560000   2.22415261
  0.19580000   2.22483965
  0.19580000   2.22483647
  0.19580000   2.22483359
  0.19580000   2.22483096
  0.19580000   2.22482854
  0.19580000   2.22482632
  0.19580000   2.22482427
  0.19580000   2.22482238
  0.19580000   2.22482062
  0.19580000   2.22481897
  0.19580000   2.22481744
  0.19580000   2.22481601
  0.19580000   2.22481466
  0.19580000   2.22481340
  0.19580000   2.22481221
  0.19580000   2.22481108
  0.19580000   2.22481002
  0.19580000   2.22480902
  0.19580000   2.22480806
  0.19580000   2.22480716
  0.19580000   2.22480630
  0.19580000   2.22480548
  0.19580000   2.22480470
  0.19600000   2.22548815
  0.19600000   2.22548497
  0.19600000   2.22548209
  0.19600000   2.22547945
  0.19600000   2.22547704
  0.19600000   2.22547482
  0.19600000   2.22547277
  0.19600000   2.22547087
  0.19600000   2.22546910
  0.19600000   2.22546746
  0.19600000   2.22546593
  0.19600000   2.22546449
  0.19600000   2.22546314
  0.19600000   2.22546188
  0.19600000   2.22546069
  0.19600000   2.22545956
  0.19600000   2.22545850
  0.19600000   2.22545749
  0.19600000   2.22545654
  0.19600000   2.22545563
  0.19600000   2.22545477
  0.19600000   2.22545395
  0.19600000   2.22545317
  0.19620000   2.22613306
  0.19620000   2.22612989
  0.19620000   2.22612700
  0.19620000   2.22612436
  0.19620000   2.22612195
  0.19620000   2.22611972
  0.19620000   2.22611767
  0.19620000   2.22611577
  0.19620000   2.22611401
  0.19620000   2.22611236
  0.19620000   2.22611082
  0.19620000   2.22610939
  0.19620000   2.22610804
  0.19620000   2.22610677
  0.19620000   2.22610558
  0.19620000   2.22610445
  0.19620000   2.22610339
  0.19620000   2.22610238
  0.19620000   2.22610143
  0.19620000   2.22610052
  0.19620000   2.22609966
  0.19620000   2.22609884
  0.19620000   2.22609805
  0.19640000   2.22677442
  0.19640000   2.22677124
  0.19640000   2.22676835
  0.19640000   2.22676571
  0.19640000   2.22676329
  0.19640000   2.22676107
  0.19640000   2.22675902
  0.19640000   2.22675711
  0.19640000   2.22675535
  0.19640000   2.22675370
  0.19640000   2.22675216
  0.19640000   2.22675072
  0.19640000   2.22674937
  0.19640000   2.22674811
  0.19640000   2.22674691
  0.19640000   2.22674578
  0.19640000   2.22674472
  0.19640000   2.22674371
  0.19640000   2.22674275
  0.19640000   2.22674184
  0.19640000   2.22674098
  0.19640000   2.22674016
  0.19640000   2.22673938
  0.19660000   2.22741224
  0.19660000   2.22740906
  0.19660000   2.22740617
  0.19660000   2.22740353
  0.19660000   2.22740111
  0.19660000   2.22739889
  0.19660000   2.22739683
  0.19660000   2.22739493
  0.19660000   2.22739316
  0.19660000   2.22739151
  0.19660000   2.22738997
  0.19660000   2.22738853
  0.19660000   2.22738718
  0.19660000   2.22738591
  0.19660000   2.22738471
  0.19660000   2.22738358
  0.19660000   2.22738252
  0.19660000   2.22738151
  0.19660000   2.22738055
  0.19660000   2.22737964
  0.19660000   2.22737878
  0.19660000   2.22737795
  0.19660000   2.22737717
  0.19680000   2.22804657
  0.19680000   2.22804339
  0.19680000   2.22804049
  0.19680000   2.22803785
  0.19680000   2.22803543
  0.19680000   2.22803321
  0.19680000   2.22803115
  0.19680000   2.22802924
  0.19680000   2.22802747
  0.19680000   2.22802582
  0.19680000   2.22802428
  0.19680000   2.22802284
  0.19680000   2.22802149
  0.19680000   2.22802022
  0.19680000   2.22801902
  0.19680000   2.22801789
  0.19680000   2.22801682
  0.19680000   2.22801581
  0.19680000   2.22801485
  0.19680000   2.22801394
  0.19680000   2.22801307
  0.19680000   2.22801225
  0.19680000   2.22801146
  0.19700000   2.22867742
  0.19700000   2.22867424
  0.19700000   2.22867135
  0.19700000   2.22866871
  0.19700000   2.22866628
  0.19700000   2.22866405
  0.19700000   2.22866200
  0.19700000   2.22866009
  0.19700000   2.22865831
  0.19700000   2.22865666
  0.19700000   2.22865512
  0.19700000   2.22865368
  0.19700000   2.22865232
  0.19700000   2.22865105
  0.19700000   2.22864985
  0.19700000   2.22864872
  0.19700000   2.22864765
  0.19700000   2.22864664
  0.19700000   2.22864568
  0.19700000   2.22864477
  0.19700000   2.22864390
  0.19700000   2.22864307
  0.19700000   2.22864229
  0.19720000   2.22930484
  0.19720000   2.22930165
  0.19720000   2.22929876
  0.19720000   2.22929612
  0.19720000   2.22929369
  0.19720000   2.22929146
  0.19720000   2.22928940
  0.19720000   2.22928749
  0.19720000   2.22928572
  0.19720000   2.22928407
  0.19720000   2.22928252
  0.19720000   2.22928108
  0.19720000   2.22927972
  0.19720000   2.22927844
  0.19720000   2.22927724
  0.19720000   2.22927611
  0.19720000   2.22927504
  0.19720000   2.22927403
  0.19720000   2.22927307
  0.19720000   2.22927215
  0.19720000   2.22927128
  0.19720000   2.22927046
  0.19720000   2.22926967
  0.19740000   2.22992884
  0.19740000   2.22992566
  0.19740000   2.22992276
  0.19740000   2.22992011
  0.19740000   2.22991769
  0.19740000   2.22991546
  0.19740000   2.22991339
  0.19740000   2.22991148
  0.19740000   2.22990971
  0.19740000   2.22990805
  0.19740000   2.22990651
  0.19740000   2.22990506
  0.19740000   2.22990370
  0.19740000   2.22990243
  0.19740000   2.22990122
  0.19740000   2.22990009
  0.19740000   2.22989902
  0.19740000   2.22989800
  0.19740000   2.22989704
  0.19740000   2.22989613
  0.19740000   2.22989526
  0.19740000   2.22989443
  0.19740000   2.22989364
  0.19760000   2.23054946
  0.19760000   2.23054627
  0.19760000   2.23054337
  0.19760000   2.23054073
  0.19760000   2.23053830
  0.19760000   2.23053607
  0.19760000   2.23053400
  0.19760000   2.23053209
  0.19760000   2.23053031
  0.19760000   2.23052866
  0.19760000   2.23052711
  0.19760000   2.23052566
  0.19760000   2.23052430
  0.19760000   2.23052302
  0.19760000   2.23052182
  0.19760000   2.23052068
  0.19760000   2.23051961
  0.19760000   2.23051859
  0.19760000   2.23051763
  0.19760000   2.23051672
  0.19760000   2.23051584
  0.19760000   2.23051502
  0.19760000   2.23051423
  0.19780000   2.23116672
  0.19780000   2.23116353
  0.19780000   2.23116063
  0.19780000   2.23115798
  0.19780000   2.23115555
  0.19780000   2.23115332
  0.19780000   2.23115125
  0.19780000   2.23114934
  0.19780000   2.23114756
  0.19780000   2.23114590
  0.19780000   2.23114435
  0.19780000   2.23114290
  0.19780000   2.23114154
  0.19780000   2.23114027
  0.19780000   2.23113906
  0.19780000   2.23113792
  0.19780000   2.23113685
  0.19780000   2.23113583
  0.19780000   2.23113486
  0.19780000   2.23113395
  0.19780000   2.23113308
  0.19780000   2.23113225
  0.19780000   2.23113146
  0.19800000   2.23178065
  0.19800000   2.23177746
  0.19800000   2.23177456
  0.19800000   2.23177191
  0.19800000   2.23176948
  0.19800000   2.23176724
  0.19800000   2.23176518
  0.19800000   2.23176326
  0.19800000   2.23176148
  0.19800000   2.23175982
  0.19800000   2.23175827
  0.19800000   2.23175682
  0.19800000   2.23175546
  0.19800000   2.23175418
  0.19800000   2.23175297
  0.19800000   2.23175183
  0.19800000   2.23175076
  0.19800000   2.23174974
  0.19800000   2.23174877
  0.19800000   2.23174785
  0.19800000   2.23174698
  0.19800000   2.23174615
  0.19800000   2.23174536
  0.19820000   2.23239129
  0.19820000   2.23238809
  0.19820000   2.23238519
  0.19820000   2.23238254
  0.19820000   2.23238011
  0.19820000   2.23237787
  0.19820000   2.23237580
  0.19820000   2.23237388
  0.19820000   2.23237210
  0.19820000   2.23237044
  0.19820000   2.23236889
  0.19820000   2.23236743
  0.19820000   2.23236607
  0.19820000   2.23236479
  0.19820000   2.23236358
  0.19820000   2.23236244
  0.19820000   2.23236136
  0.19820000   2.23236034
  0.19820000   2.23235937
  0.19820000   2.23235845
  0.19820000   2.23235758
  0.19820000   2.23235675
  0.19820000   2.23235595
  0.19840000   2.23299864
  0.19840000   2.23299545
  0.19840000   2.23299255
  0.19840000   2.23298989
  0.19840000   2.23298746
  0.19840000   2.23298522
  0.19840000   2.23298315
  0.19840000   2.23298123
  0.19840000   2.23297944
  0.19840000   2.23297778
  0.19840000   2.23297623
  0.19840000   2.23297477
  0.19840000   2.23297341
  0.19840000   2.23297212
  0.19840000   2.23297091
  0.19840000   2.23296977
  0.19840000   2.23296869
  0.19840000   2.23296767
  0.19840000   2.23296670
  0.19840000   2.23296578
  0.19840000   2.23296491
  0.19840000   2.23296407
  0.19840000   2.23296328
  0.19860000   2.23360275
  0.19860000   2.23359956
  0.19860000   2.23359665
  0.19860000   2.23359400
  0.19860000   2.23359156
  0.19860000   2.23358932
  0.19860000   2.23358725
  0.19860000   2.23358533
  0.19860000   2.23358354
  0.19860000   2.23358188
  0.19860000   2.23358032
  0.19860000   2.23357886
  0.19860000   2.23357750
  0.19860000   2.23357621
  0.19860000   2.23357500
  0.19860000   2.23357386
  0.19860000   2.23357278
  0.19860000   2.23357176
  0.19860000   2.23357078
  0.19860000   2.23356986
  0.19860000   2.23356899
  0.19860000   2.23356815
  0.19860000   2.23356736
  0.19880000   2.23420364
  0.19880000   2.23420045
  0.19880000   2.23419754
  0.19880000   2.23419488
  0.19880000   2.23419244
  0.19880000   2.23419020
  0.19880000   2.23418812
  0.19880000   2.23418620
  0.19880000   2.23418441
  0.19880000   2.23418275
  0.19880000   2.23418119
  0.19880000   2.23417973
  0.19880000   2.23417837
  0.19880000   2.23417708
  0.19880000   2.23417587
  0.19880000   2.23417472
  0.19880000   2.23417364
  0.19880000   2.23417262
  0.19880000   2.23417164
  0.19880000   2.23417072
  0.19880000   2.23416984
  0.19880000   2.23416901
  0.19880000   2.23416821
  0.19900000   2.23480134
  0.19900000   2.23479814
  0.19900000   2.23479523
  0.19900000   2.23479257
  0.19900000   2.23479013
  0.19900000   2.23478788
  0.19900000   2.23478581
  0.19900000   2.23478388
  0.19900000   2.23478209
  0.19900000   2.23478043
  0.19900000   2.23477887
  0.19900000   2.23477741
  0.19900000   2.23477604
  0.19900000   2.23477475
  0.19900000   2.23477354
  0.19900000   2.23477239
  0.19900000   2.23477131
  0.19900000   2.23477028
  0.19900000   2.23476931
  0.19900000   2.23476839
  0.19900000   2.23476751
  0.19900000   2.23476667
  0.19900000   2.23476587
  0.19920000   2.23539586
  0.19920000   2.23539266
  0.19920000   2.23538975
  0.19920000   2.23538709
  0.19920000   2.23538465
  0.19920000   2.23538240
  0.19920000   2.23538032
  0.19920000   2.23537840
  0.19920000   2.23537660
  0.19920000   2.23537494
  0.19920000   2.23537338
  0.19920000   2.23537191
  0.19920000   2.23537054
  0.19920000   2.23536925
  0.19920000   2.23536804
  0.19920000   2.23536689
  0.19920000   2.23536581
  0.19920000   2.23536478
  0.19920000   2.23536381
  0.19920000   2.23536288
  0.19920000   2.23536200
  0.19920000   2.23536116
  0.19920000   2.23536036
  0.19940000   2.23598724
  0.19940000   2.23598404
  0.19940000   2.23598113
  0.19940000   2.23597847
  0.19940000   2.23597602
  0.19940000   2.23597377
  0.19940000   2.23597169
  0.19940000   2.23596976
  0.19940000   2.23596797
  0.19940000   2.23596630
  0.19940000   2.23596474
  0.19940000   2.23596328
  0.19940000   2.23596190
  0.19940000   2.23596061
  0.19940000   2.23595940
  0.19940000   2.23595825
  0.19940000   2.23595716
  0.19940000   2.23595613
  0.19940000   2.23595516
  0.19940000   2.23595423
  0.19940000   2.23595335
  0.19940000   2.23595251
  0.19940000   2.23595171
  0.19960000   2.23657550
  0.19960000   2.23657230
  0.19960000   2.23656939
  0.19960000   2.23656672
  0.19960000   2.23656428
  0.19960000   2.23656203
  0.19960000   2.23655994
  0.19960000   2.23655801
  0.19960000   2.23655622
  0.19960000   2.23655455
  0.19960000   2.23655298
  0.19960000   2.23655152
  0.19960000   2.23655014
  0.19960000   2.23654885
  0.19960000   2.23654763
  0.19960000   2.23654648
  0.19960000   2.23654540
  0.19960000   2.23654437
  0.19960000   2.23654339
  0.19960000   2.23654246
  0.19960000   2.23654158
  0.19960000   2.23654074
  0.19960000   2.23653994
  0.19980000   2.23716067
  0.19980000   2.23715747
  0.19980000   2.23715455
  0.19980000   2.23715188
  0.19980000   2.23714944
  0.19980000   2.23714719
  0.19980000   2.23714510
  0.19980000   2.23714317
  0.19980000   2.23714137
  0.19980000   2.23713970
  0.19980000   2.23713814
  0.19980000   2.23713667
  0.19980000   2.23713529
  0.19980000   2.23713400
  0.19980000   2.23713278
  0.19980000   2.23713163
  0.19980000   2.23713054
  0.19980000   2.23712951
  0.19980000   2.23712853
  0.19980000   2.23712760
  0.19980000   2.23712672
  0.19980000   2.23712588
  0.19980000   2.23712507
  0.20000000   2.23774277
  0.20000000   2.23773957
  0.20000000   2.23773665
  0.20000000   2.23773398
  0.20000000   2.23773153
  0.20000000   2.23772928
  0.20000000   2.23772719
  0.20000000   2.23772526
  0.20000000   2.23772346
  0.20000000   2.23772178
  0.20000000   2.23772022
  0.20000000   2.23771875
  0.20000000   2.23771737
  0.20000000   2.23771608
  0.20000000   2.23771485
  0.20000000   2.23771370
  0.20000000   2.23771261
  0.20000000   2.23771158
  0.20000000   2.23771060
  0.20000000   2.23770967
  0.20000000   2.23770879
  0.20000000   2.23770794
  0.20000000   2.23770714
  0.20020000   2.23832183
  0.20020000   2.23831862
  0.20020000   2.23831570
  0.20020000   2.23831303
  0.20020000   2.23831058
  0.20020000   2.23830832
  0.20020000   2.23830623
  0.20020000   2.23830430
  0.20020000   2.23830250
  0.20020000   2.23830082
  0.20020000   2.23829925
  0.20020000   2.23829779
  0.20020000   2.23829641
  0.20020000   2.23829511
  0.20020000   2.23829389
  0.20020000   2.23829273
  0.20020000   2.23829164
  0.20020000   2.23829061
  0.20020000   2.23828963
  0.20020000   2.23828869
  0.20020000   2.23828781
  0.20020000   2.23828697
  0.20020000   2.23828616
  0.20040000   2.23889786
  0.20040000   2.23889465
  0.20040000   2.23889173
  0.20040000   2.23888906
  0.20040000   2.23888661
  0.20040000   2.23888435
  0.20040000   2.23888226
  0.20040000   2.23888032
  0.20040000   2.23887852
  0.20040000   2.23887684
  0.20040000   2.23887527
  0.20040000   2.23887380
  0.20040000   2.23887242
  0.20040000   2.23887112
  0.20040000   2.23886990
  0.20040000   2.23886874
  0.20040000   2.23886765
  0.20040000   2.23886661
  0.20040000   2.23886563
  0.20040000   2.23886470
  0.20040000   2.23886381
  0.20040000   2.23886297
  0.20040000   2.23886216
  0.20060000   2.23947090
  0.20060000   2.23946769
  0.20060000   2.23946476
  0.20060000   2.23946209
  0.20060000   2.23945964
  0.20060000   2.23945738
  0.20060000   2.23945528
  0.20060000   2.23945335
  0.20060000   2.23945154
  0.20060000   2.23944986
  0.20060000   2.23944829
  0.20060000   2.23944682
  0.20060000   2.23944544
  0.20060000   2.23944414
  0.20060000   2.23944291
  0.20060000   2.23944175
  0.20060000   2.23944066
  0.20060000   2.23943962
  0.20060000   2.23943864
  0.20060000   2.23943771
  0.20060000   2.23943682
  0.20060000   2.23943597
  0.20060000   2.23943517
  0.20080000   2.24004096
  0.20080000   2.24003775
  0.20080000   2.24003483
  0.20080000   2.24003215
  0.20080000   2.24002970
  0.20080000   2.24002743
  0.20080000   2.24002534
  0.20080000   2.24002340
  0.20080000   2.24002159
  0.20080000   2.24001991
  0.20080000   2.24001834
  0.20080000   2.24001686
  0.20080000   2.24001548
  0.20080000   2.24001418
  0.20080000   2.24001295
  0.20080000   2.24001179
  0.20080000   2.24001070
  0.20080000   2.24000966
  0.20080000   2.24000868
  0.20080000   2.24000774
  0.20080000   2.24000685
  0.20080000   2.24000600
  0.20080000   2.24000520
  0.20100000   2.24060808
  0.20100000   2.24060487
  0.20100000   2.24060194
  0.20100000   2.24059926
  0.20100000   2.24059680
  0.20100000   2.24059454
  0.20100000   2.24059244
  0.20100000   2.24059050
  0.20100000   2.24058869
  0.20100000   2.24058701
  0.20100000   2.24058544
  0.20100000   2.24058396
  0.20100000   2.24058258
  0.20100000   2.24058127
  0.20100000   2.24058004
  0.20100000   2.24057888
  0.20100000   2.24057779
  0.20100000   2.24057675
  0.20100000   2.24057576
  0.20100000   2.24057483
  0.20100000   2.24057394
  0.20100000   2.24057309
  0.20100000   2.24057228
  0.20120000   2.24117227
  0.20120000   2.24116905
  0.20120000   2.24116612
  0.20120000   2.24116344
  0.20120000   2.24116098
  0.20120000   2.24115872
  0.20120000   2.24115662
  0.20120000   2.24115468
  0.20120000   2.24115287
  0.20120000   2.24115118
  0.20120000   2.24114961
  0.20120000   2.24114813
  0.20120000   2.24114674
  0.20120000   2.24114544
  0.20120000   2.24114421
  0.20120000   2.24114305
  0.20120000   2.24114195
  0.20120000   2.24114091
  0.20120000   2.24113992
  0.20120000   2.24113898
  0.20120000   2.24113809
  0.20120000   2.24113724
  0.20120000   2.24113643
  0.20140000   2.24173355
  0.20140000   2.24173034
  0.20140000   2.24172741
  0.20140000   2.24172473
  0.20140000   2.24172226
  0.20140000   2.24171999
  0.20140000   2.24171790
  0.20140000   2.24171595
  0.20140000   2.24171414
  0.20140000   2.24171245
  0.20140000   2.24171087
  0.20140000   2.24170940
  0.20140000   2.24170801
  0.20140000   2.24170670
  0.20140000   2.24170547
  0.20140000   2.24170431
  0.20140000   2.24170321
  0.20140000   2.24170217
  0.20140000   2.24170118
  0.20140000   2.24170024
  0.20140000   2.24169935
  0.20140000   2.24169849
  0.20140000   2.24169768
  0.20160000   2.24229196
  0.20160000   2.24228874
  0.20160000   2.24228581
  0.20160000   2.24228312
  0.20160000   2.24228066
  0.20160000   2.24227839
  0.20160000   2.24227629
  0.20160000   2.24227434
  0.20160000   2.24227253
  0.20160000   2.24227084
  0.20160000   2.24226926
  0.20160000   2.24226778
  0.20160000   2.24226639
  0.20160000   2.24226508
  0.20160000   2.24226385
  0.20160000   2.24226269
  0.20160000   2.24226158
  0.20160000   2.24226054
  0.20160000   2.24225955
  0.20160000   2.24225861
  0.20160000   2.24225772
  0.20160000   2.24225687
  0.20160000   2.24225605
  0.20180000   2.24284750
  0.20180000   2.24284428
  0.20180000   2.24284135
  0.20180000   2.24283866
  0.20180000   2.24283620
  0.20180000   2.24283393
  0.20180000   2.24283182
  0.20180000   2.24282987
  0.20180000   2.24282806
  0.20180000   2.24282637
  0.20180000   2.24282479
  0.20180000   2.24282331
  0.20180000   2.24282191
  0.20180000   2.24282060
  0.20180000   2.24281937
  0.20180000   2.24281821
  0.20180000   2.24281710
  0.20180000   2.24281606
  0.20180000   2.24281507
  0.20180000   2.24281413
  0.20180000   2.24281323
  0.20180000   2.24281238
  0.20180000   2.24281157
  0.20200000   2.24340021
  0.20200000   2.24339699
  0.20200000   2.24339405
  0.20200000   2.24339137
  0.20200000   2.24338890
  0.20200000   2.24338663
  0.20200000   2.24338452
  0.20200000   2.24338257
  0.20200000   2.24338076
  0.20200000   2.24337906
  0.20200000   2.24337748
  0.20200000   2.24337599
  0.20200000   2.24337460
  0.20200000   2.24337329
  0.20200000   2.24337206
  0.20200000   2.24337089
  0.20200000   2.24336978
  0.20200000   2.24336874
  0.20200000   2.24336775
  0.20200000   2.24336680
  0.20200000   2.24336591
  0.20200000   2.24336505
  0.20200000   2.24336424
  0.20220000   2.24395011
  0.20220000   2.24394688
  0.20220000   2.24394395
  0.20220000   2.24394126
  0.20220000   2.24393879
  0.20220000   2.24393651
  0.20220000   2.24393441
  0.20220000   2.24393245
  0.20220000   2.24393063
  0.20220000   2.24392894
  0.20220000   2.24392736
  0.20220000   2.24392587
  0.20220000   2.24392447
  0.20220000   2.24392316
  0.20220000   2.24392193
  0.20220000   2.24392076
  0.20220000   2.24391965
  0.20220000   2.24391860
  0.20220000   2.24391761
  0.20220000   2.24391667
  0.20220000   2.24391577
  0.20220000   2.24391492
  0.20220000   2.24391410
  0.20240000   2.24449721
  0.20240000   2.24449398
  0.20240000   2.24449104
  0.20240000   2.24448835
  0.20240000   2.24448588
  0.20240000   2.24448360
  0.20240000   2.24448150
  0.20240000   2.24447954
  0.20240000   2.24447772
  0.20240000   2.24447602
  0.20240000   2.24447444
  0.20240000   2.24447295
  0.20240000   2.24447156
  0.20240000   2.24447024
  0.20240000   2.24446900
  0.20240000   2.24446783
  0.20240000   2.24446673
  0.20240000   2.24446568
  0.20240000   2.24446468
  0.20240000   2.24446374
  0.20240000   2.24446284
  0.20240000   2.24446198
  0.20240000   2.24446117
  0.20260000   2.24504154
  0.20260000   2.24503831
  0.20260000   2.24503537
  0.20260000   2.24503268
  0.20260000   2.24503020
  0.20260000   2.24502792
  0.20260000   2.24502581
  0.20260000   2.24502386
  0.20260000   2.24502204
  0.20260000   2.24502034
  0.20260000   2.24501875
  0.20260000   2.24501726
  0.20260000   2.24501586
  0.20260000   2.24501455
  0.20260000   2.24501331
  0.20260000   2.24501214
  0.20260000   2.24501103
  0.20260000   2.24500998
  0.20260000   2.24500898
  0.20260000   2.24500804
  0.20260000   2.24500714
  0.20260000   2.24500628
  0.20260000   2.24500546
  0.20280000   2.24558312
  0.20280000   2.24557989
  0.20280000   2.24557695
  0.20280000   2.24557425
  0.20280000   2.24557178
  0.20280000   2.24556949
  0.20280000   2.24556738
  0.20280000   2.24556542
  0.20280000   2.24556360
  0.20280000   2.24556190
  0.20280000   2.24556031
  0.20280000   2.24555882
  0.20280000   2.24555742
  0.20280000   2.24555610
  0.20280000   2.24555486
  0.20280000   2.24555369
  0.20280000   2.24555258
  0.20280000   2.24555153
  0.20280000   2.24555053
  0.20280000   2.24554959
  0.20280000   2.24554868
  0.20280000   2.24554783
  0.20280000   2.24554701
  0.20300000   2.24612197
  0.20300000   2.24611874
  0.20300000   2.24611579
  0.20300000   2.24611310
  0.20300000   2.24611062
  0.20300000   2.24610833
  0.20300000   2.24610622
  0.20300000   2.24610426
  0.20300000   2.24610244
  0.20300000   2.24610074
  0.20300000   2.24609914
  0.20300000   2.24609765
  0.20300000   2.24609625
  0.20300000   2.24609493
  0.20300000   2.24609369
  0.20300000   2.24609251
  0.20300000   2.24609140
  0.20300000   2.24609035
  0.20300000   2.24608935
  0.20300000   2.24608840
  0.20300000   2.24608750
  0.20300000   2.24608664
  0.20300000   2.24608582
  0.20320000   2.24665811
  0.20320000   2.24665488
  0.20320000   2.24665193
  0.20320000   2.24664923
  0.20320000   2.24664675
  0.20320000   2.24664447
  0.20320000   2.24664235
  0.20320000   2.24664039
  0.20320000   2.24663856
  0.20320000   2.24663686
  0.20320000   2.24663527
  0.20320000   2.24663377
  0.20320000   2.24663237
  0.20320000   2.24663105
  0.20320000   2.24662980
  0.20320000   2.24662863
  0.20320000   2.24662752
  0.20320000   2.24662646
  0.20320000   2.24662547
  0.20320000   2.24662451
  0.20320000   2.24662361
  0.20320000   2.24662275
  0.20320000   2.24662193
  0.20340000   2.24719157
  0.20340000   2.24718833
  0.20340000   2.24718538
  0.20340000   2.24718268
  0.20340000   2.24718020
  0.20340000   2.24717791
  0.20340000   2.24717579
  0.20340000   2.24717383
  0.20340000   2.24717200
  0.20340000   2.24717030
  0.20340000   2.24716870
  0.20340000   2.24716721
  0.20340000   2.24716580
  0.20340000   2.24716448
  0.20340000   2.24716323
  0.20340000   2.24716206
  0.20340000   2.24716094
  0.20340000   2.24715989
  0.20340000   2.24715889
  0.20340000   2.24715794
  0.20340000   2.24715703
  0.20340000   2.24715617
  0.20340000   2.24715535
  0.20360000   2.24772235
  0.20360000   2.24771912
  0.20360000   2.24771616
  0.20360000   2.24771346
  0.20360000   2.24771098
  0.20360000   2.24770869
  0.20360000   2.24770657
  0.20360000   2.24770460
  0.20360000   2.24770277
  0.20360000   2.24770106
  0.20360000   2.24769947
  0.20360000   2.24769797
  0.20360000   2.24769657
  0.20360000   2.24769524
  0.20360000   2.24769400
  0.20360000   2.24769282
  0.20360000   2.24769170
  0.20360000   2.24769065
  0.20360000   2.24768964
  0.20360000   2.24768869
  0.20360000   2.24768778
  0.20360000   2.24768692
  0.20360000   2.24768610
  0.20380000   2.24825049
  0.20380000   2.24824725
  0.20380000   2.24824430
  0.20380000   2.24824159
  0.20380000   2.24823911
  0.20380000   2.24823682
  0.20380000   2.24823470
  0.20380000   2.24823273
  0.20380000   2.24823089
  0.20380000   2.24822919
  0.20380000   2.24822759
  0.20380000   2.24822609
  0.20380000   2.24822468
  0.20380000   2.24822336
  0.20380000   2.24822211
  0.20380000   2.24822093
  0.20380000   2.24821981
  0.20380000   2.24821875
  0.20380000   2.24821775
  0.20380000   2.24821680
  0.20380000   2.24821589
  0.20380000   2.24821503
  0.20380000   2.24821420
  0.20400000   2.24877600
  0.20400000   2.24877276
  0.20400000   2.24876980
  0.20400000   2.24876710
  0.20400000   2.24876461
  0.20400000   2.24876232
  0.20400000   2.24876019
  0.20400000   2.24875822
  0.20400000   2.24875639
  0.20400000   2.24875468
  0.20400000   2.24875308
  0.20400000   2.24875158
  0.20400000   2.24875017
  0.20400000   2.24874884
  0.20400000   2.24874759
  0.20400000   2.24874641
  0.20400000   2.24874529
  0.20400000   2.24874424
  0.20400000   2.24874323
  0.20400000   2.24874228
  0.20400000   2.24874137
  0.20400000   2.24874050
  0.20400000   2.24873968
  0.20420000   2.24929890
  0.20420000   2.24929566
  0.20420000   2.24929270
  0.20420000   2.24928999
  0.20420000   2.24928751
  0.20420000   2.24928521
  0.20420000   2.24928309
  0.20420000   2.24928111
  0.20420000   2.24927928
  0.20420000   2.24927757
  0.20420000   2.24927596
  0.20420000   2.24927446
  0.20420000   2.24927305
  0.20420000   2.24927172
  0.20420000   2.24927047
  0.20420000   2.24926929
  0.20420000   2.24926817
  0.20420000   2.24926711
  0.20420000   2.24926610
  0.20420000   2.24926515
  0.20420000   2.24926424
  0.20420000   2.24926337
  0.20420000   2.24926254
  0.20440000   2.24981922
  0.20440000   2.24981597
  0.20440000   2.24981301
  0.20440000   2.24981030
  0.20440000   2.24980781
  0.20440000   2.24980551
  0.20440000   2.24980339
  0.20440000   2.24980141
  0.20440000   2.24979958
  0.20440000   2.24979786
  0.20440000   2.24979626
  0.20440000   2.24979475
  0.20440000   2.24979334
  0.20440000   2.24979201
  0.20440000   2.24979076
  0.20440000   2.24978958
  0.20440000   2.24978846
  0.20440000   2.24978739
  0.20440000   2.24978639
  0.20440000   2.24978543
  0.20440000   2.24978452
  0.20440000   2.24978365
  0.20440000   2.24978282
  0.20460000   2.25033696
  0.20460000   2.25033372
  0.20460000   2.25033075
  0.20460000   2.25032804
  0.20460000   2.25032555
  0.20460000   2.25032325
  0.20460000   2.25032112
  0.20460000   2.25031914
  0.20460000   2.25031730
  0.20460000   2.25031559
  0.20460000   2.25031398
  0.20460000   2.25031248
  0.20460000   2.25031107
  0.20460000   2.25030973
  0.20460000   2.25030848
  0.20460000   2.25030729
  0.20460000   2.25030617
  0.20460000   2.25030511
  0.20460000   2.25030410
  0.20460000   2.25030314
  0.20460000   2.25030223
  0.20460000   2.25030136
  0.20460000   2.25030053
  0.20480000   2.25085216
  0.20480000   2.25084891
  0.20480000   2.25084594
  0.20480000   2.25084323
  0.20480000   2.25084073
  0.20480000   2.25083843
  0.20480000   2.25083630
  0.20480000   2.25083432
  0.20480000   2.25083248
  0.20480000   2.25083077
  0.20480000   2.25082916
  0.20480000   2.25082765
  0.20480000   2.25082624
  0.20480000   2.25082491
  0.20480000   2.25082365
  0.20480000   2.25082246
  0.20480000   2.25082134
  0.20480000   2.25082027
  0.20480000   2.25081926
  0.20480000   2.25081830
  0.20480000   2.25081739
  0.20480000   2.25081652
  0.20480000   2.25081569
  0.20500000   2.25136482
  0.20500000   2.25136157
  0.20500000   2.25135860
  0.20500000   2.25135589
  0.20500000   2.25135339
  0.20500000   2.25135109
  0.20500000   2.25134895
  0.20500000   2.25134697
  0.20500000   2.25134513
  0.20500000   2.25134341
  0.20500000   2.25134180
  0.20500000   2.25134030
  0.20500000   2.25133888
  0.20500000   2.25133754
  0.20500000   2.25133629
  0.20500000   2.25133510
  0.20500000   2.25133397
  0.20500000   2.25133291
  0.20500000   2.25133190
  0.20500000   2.25133094
  0.20500000   2.25133002
  0.20500000   2.25132915
  0.20500000   2.25132832
  0.20520000   2.25187497
  0.20520000   2.25187172
  0.20520000   2.25186875
  0.20520000   2.25186603
  0.20520000   2.25186353
  0.20520000   2.25186123
  0.20520000   2.25185909
  0.20520000   2.25185711
  0.20520000   2.25185527
  0.20520000   2.25185355
  0.20520000   2.25185194
  0.20520000   2.25185043
  0.20520000   2.25184901
  0.20520000   2.25184767
  0.20520000   2.25184641
  0.20520000   2.25184522
  0.20520000   2.25184410
  0.20520000   2.25184303
  0.20520000   2.25184202
  0.20520000   2.25184106
  0.20520000   2.25184014
  0.20520000   2.25183927
  0.20520000   2.25183843
  0.20540000   2.25238263
  0.20540000   2.25237937
  0.20540000   2.25237640
  0.20540000   2.25237368
  0.20540000   2.25237118
  0.20540000   2.25236887
  0.20540000   2.25236674
  0.20540000   2.25236475
  0.20540000   2.25236291
  0.20540000   2.25236119
  0.20540000   2.25235957
  0.20540000   2.25235806
  0.20540000   2.25235664
  0.20540000   2.25235530
  0.20540000   2.25235404
  0.20540000   2.25235285
  0.20540000   2.25235173
  0.20540000   2.25235066
  0.20540000   2.25234964
  0.20540000   2.25234868
  0.20540000   2.25234776
  0.20540000   2.25234689
  0.20540000   2.25234606
  0.20560000   2.25288781
  0.20560000   2.25288456
  0.20560000   2.25288158
  0.20560000   2.25287886
  0.20560000   2.25287636
  0.20560000   2.25287404
  0.20560000   2.25287191
  0.20560000   2.25286992
  0.20560000   2.25286807
  0.20560000   2.25286635
  0.20560000   2.25286474
  0.20560000   2.25286322
  0.20560000   2.25286180
  0.20560000   2.25286046
  0.20560000   2.25285920
  0.20560000   2.25285801
  0.20560000   2.25285688
  0.20560000   2.25285581
  0.20560000   2.25285479
  0.20560000   2.25285383
  0.20560000   2.25285291
  0.20560000   2.25285204
  0.20560000   2.25285120
  0.20580000   2.25339054
  0.20580000   2.25338728
  0.20580000   2.25338430
  0.20580000   2.25338158
  0.20580000   2.25337907
  0.20580000   2.25337676
  0.20580000   2.25337462
  0.20580000   2.25337263
  0.20580000   2.25337078
  0.20580000   2.25336906
  0.20580000   2.25336744
  0.20580000   2.25336592
  0.20580000   2.25336450
  0.20580000   2.25336316
  0.20580000   2.25336190
  0.20580000   2.25336070
  0.20580000   2.25335957
  0.20580000   2.25335850
  0.20580000   2.25335749
  0.20580000   2.25335652
  0.20580000   2.25335560
  0.20580000   2.25335472
  0.20580000   2.25335389
  0.20600000   2.25389082
  0.20600000   2.25388756
  0.20600000   2.25388458
  0.20600000   2.25388185
  0.20600000   2.25387935
  0.20600000   2.25387703
  0.20600000   2.25387489
  0.20600000   2.25387290
  0.20600000   2.25387105
  0.20600000   2.25386932
  0.20600000   2.25386770
  0.20600000   2.25386619
  0.20600000   2.25386476
  0.20600000   2.25386342
  0.20600000   2.25386216
  0.20600000   2.25386096
  0.20600000   2.25385983
  0.20600000   2.25385876
  0.20600000   2.25385774
  0.20600000   2.25385677
  0.20600000   2.25385585
  0.20600000   2.25385497
  0.20600000   2.25385414
  0.20620000   2.25438868
  0.20620000   2.25438542
  0.20620000   2.25438244
  0.20620000   2.25437971
  0.20620000   2.25437720
  0.20620000   2.25437489
  0.20620000   2.25437274
  0.20620000   2.25437075
  0.20620000   2.25436890
  0.20620000   2.25436717
  0.20620000   2.25436555
  0.20620000   2.25436403
  0.20620000   2.25436260
  0.20620000   2.25436126
  0.20620000   2.25435999
  0.20620000   2.25435880
  0.20620000   2.25435766
  0.20620000   2.25435659
  0.20620000   2.25435557
  0.20620000   2.25435460
  0.20620000   2.25435368
  0.20620000   2.25435280
  0.20620000   2.25435196
  0.20640000   2.25488414
  0.20640000   2.25488088
  0.20640000   2.25487789
  0.20640000   2.25487516
  0.20640000   2.25487265
  0.20640000   2.25487033
  0.20640000   2.25486819
  0.20640000   2.25486619
  0.20640000   2.25486434
  0.20640000   2.25486261
  0.20640000   2.25486099
  0.20640000   2.25485947
  0.20640000   2.25485804
  0.20640000   2.25485669
  0.20640000   2.25485542
  0.20640000   2.25485423
  0.20640000   2.25485309
  0.20640000   2.25485202
  0.20640000   2.25485100
  0.20640000   2.25485003
  0.20640000   2.25484910
  0.20640000   2.25484823
  0.20640000   2.25484739
  0.20660000   2.25537721
  0.20660000   2.25537395
  0.20660000   2.25537096
  0.20660000   2.25536823
  0.20660000   2.25536571
  0.20660000   2.25536340
  0.20660000   2.25536125
  0.20660000   2.25535925
  0.20660000   2.25535739
  0.20660000   2.25535566
  0.20660000   2.25535404
  0.20660000   2.25535252
  0.20660000   2.25535109
  0.20660000   2.25534974
  0.20660000   2.25534847
  0.20660000   2.25534727
  0.20660000   2.25534614
  0.20660000   2.25534506
  0.20660000   2.25534404
  0.20660000   2.25534307
  0.20660000   2.25534214
  0.20660000   2.25534126
  0.20660000   2.25534042
  0.20680000   2.25586791
  0.20680000   2.25586465
  0.20680000   2.25586166
  0.20680000   2.25585893
  0.20680000   2.25585641
  0.20680000   2.25585409
  0.20680000   2.25585194
  0.20680000   2.25584994
  0.20680000   2.25584808
  0.20680000   2.25584635
  0.20680000   2.25584472
  0.20680000   2.25584320
  0.20680000   2.25584177
  0.20680000   2.25584042
  0.20680000   2.25583915
  0.20680000   2.25583795
  0.20680000   2.25583681
  0.20680000   2.25583573
  0.20680000   2.25583471
  0.20680000   2.25583374
  0.20680000   2.25583281
  0.20680000   2.25583193
  0.20680000   2.25583109
  0.20700000   2.25635626
  0.20700000   2.25635300
  0.20700000   2.25635000
  0.20700000   2.25634727
  0.20700000   2.25634475
  0.20700000   2.25634243
  0.20700000   2.25634027
  0.20700000   2.25633828
  0.20700000   2.25633642
  0.20700000   2.25633468
  0.20700000   2.25633305
  0.20700000   2.25633153
  0.20700000   2.25633009
  0.20700000   2.25632874
  0.20700000   2.25632747
  0.20700000   2.25632627
  0.20700000   2.25632513
  0.20700000   2.25632405
  0.20700000   2.25632303
  0.20700000   2.25632205
  0.20700000   2.25632113
  0.20700000   2.25632024
  0.20700000   2.25631940
  0.20720000   2.25684227
  0.20720000   2.25683901
  0.20720000   2.25683602
  0.20720000   2.25683328
  0.20720000   2.25683076
  0.20720000   2.25682843
  0.20720000   2.25682628
  0.20720000   2.25682428
  0.20720000   2.25682241
  0.20720000   2.25682067
  0.20720000   2.25681905
  0.20720000   2.25681752
  0.20720000   2.25681608
  0.20720000   2.25681473
  0.20720000   2.25681346
  0.20720000   2.25681226
  0.20720000   2.25681112
  0.20720000   2.25681004
  0.20720000   2.25680901
  0.20720000   2.25680803
  0.20720000   2.25680711
  0.20720000   2.25680622
  0.20720000   2.25680538
  0.20740000   2.25732597
  0.20740000   2.25732270
  0.20740000   2.25731971
  0.20740000   2.25731697
  0.20740000   2.25731444
  0.20740000   2.25731212
  0.20740000   2.25730996
  0.20740000   2.25730796
  0.20740000   2.25730609
  0.20740000   2.25730435
  0.20740000   2.25730272
  0.20740000   2.25730119
  0.20740000   2.25729976
  0.20740000   2.25729841
  0.20740000   2.25729713
  0.20740000   2.25729592
  0.20740000   2.25729478
  0.20740000   2.25729370
  0.20740000   2.25729268
  0.20740000   2.25729170
  0.20740000   2.25729077
  0.20740000   2.25728988
  0.20740000   2.25728904
  0.20760000   2.25780736
  0.20760000   2.25780410
  0.20760000   2.25780110
  0.20760000   2.25779836
  0.20760000   2.25779583
  0.20760000   2.25779350
  0.20760000   2.25779134
  0.20760000   2.25778934
  0.20760000   2.25778747
  0.20760000   2.25778573
  0.20760000   2.25778410
  0.20760000   2.25778257
  0.20760000   2.25778113
  0.20760000   2.25777977
  0.20760000   2.25777850
  0.20760000   2.25777729
  0.20760000   2.25777615
  0.20760000   2.25777507
  0.20760000   2.25777404
  0.20760000   2.25777306
  0.20760000   2.25777213
  0.20760000   2.25777124
  0.20760000   2.25777040
  0.20780000   2.25828647
  0.20780000   2.25828320
  0.20780000   2.25828020
  0.20780000   2.25827746
  0.20780000   2.25827493
  0.20780000   2.25827260
  0.20780000   2.25827044
  0.20780000   2.25826843
  0.20780000   2.25826656
  0.20780000   2.25826482
  0.20780000   2.25826319
  0.20780000   2.25826165
  0.20780000   2.25826021
  0.20780000   2.25825886
  0.20780000   2.25825758
  0.20780000   2.25825637
  0.20780000   2.25825523
  0.20780000   2.25825414
  0.20780000   2.25825311
  0.20780000   2.25825214
  0.20780000   2.25825120
  0.20780000   2.25825032
  0.20780000   2.25824947
  0.20800000   2.25876331
  0.20800000   2.25876004
  0.20800000   2.25875703
  0.20800000   2.25875429
  0.20800000   2.25875176
  0.20800000   2.25874943
  0.20800000   2.25874726
  0.20800000   2.25874526
  0.20800000   2.25874338
  0.20800000   2.25874164
  0.20800000   2.25874000
  0.20800000   2.25873847
  0.20800000   2.25873703
  0.20800000   2.25873567
  0.20800000   2.25873439
  0.20800000   2.25873318
  0.20800000   2.25873204
  0.20800000   2.25873095
  0.20800000   2.25872992
  0.20800000   2.25872894
  0.20800000   2.25872801
  0.20800000   2.25872712
  0.20800000   2.25872627
  0.20820000   2.25923789
  0.20820000   2.25923463
  0.20820000   2.25923162
  0.20820000   2.25922887
  0.20820000   2.25922634
  0.20820000   2.25922400
  0.20820000   2.25922184
  0.20820000   2.25921983
  0.20820000   2.25921795
  0.20820000   2.25921621
  0.20820000   2.25921457
  0.20820000   2.25921304
  0.20820000   2.25921159
  0.20820000   2.25921023
  0.20820000   2.25920895
  0.20820000   2.25920774
  0.20820000   2.25920659
  0.20820000   2.25920551
  0.20820000   2.25920447
  0.20820000   2.25920349
  0.20820000   2.25920256
  0.20820000   2.25920167
  0.20820000   2.25920082
  0.20840000   2.25971024
  0.20840000   2.25970697
  0.20840000   2.25970396
  0.20840000   2.25970121
  0.20840000   2.25969868
  0.20840000   2.25969634
  0.20840000   2.25969417
  0.20840000   2.25969216
  0.20840000   2.25969029
  0.20840000   2.25968854
  0.20840000   2.25968690
  0.20840000   2.25968536
  0.20840000   2.25968392
  0.20840000   2.25968256
  0.20840000   2.25968127
  0.20840000   2.25968006
  0.20840000   2.25967891
  0.20840000   2.25967782
  0.20840000   2.25967679
  0.20840000   2.25967581
  0.20840000   2.25967487
  0.20840000   2.25967398
  0.20840000   2.25967313
  0.20860000   2.26018037
  0.20860000   2.26017710
  0.20860000   2.26017408
  0.20860000   2.26017133
  0.20860000   2.26016880
  0.20860000   2.26016646
  0.20860000   2.26016429
  0.20860000   2.26016227
  0.20860000   2.26016040
  0.20860000   2.26015865
  0.20860000   2.26015700
  0.20860000   2.26015547
  0.20860000   2.26015402
  0.20860000   2.26015266
  0.20860000   2.26015137
  0.20860000   2.26015016
  0.20860000   2.26014901
  0.20860000   2.26014792
  0.20860000   2.26014689
  0.20860000   2.26014590
  0.20860000   2.26014497
  0.20860000   2.26014408
  0.20860000   2.26014322
  0.20880000   2.26064829
  0.20880000   2.26064502
  0.20880000   2.26064200
  0.20880000   2.26063925
  0.20880000   2.26063671
  0.20880000   2.26063437
  0.20880000   2.26063220
  0.20880000   2.26063018
  0.20880000   2.26062830
  0.20880000   2.26062655
  0.20880000   2.26062491
  0.20880000   2.26062337
  0.20880000   2.26062192
  0.20880000   2.26062056
  0.20880000   2.26061927
  0.20880000   2.26061805
  0.20880000   2.26061690
  0.20880000   2.26061581
  0.20880000   2.26061478
  0.20880000   2.26061379
  0.20880000   2.26061285
  0.20880000   2.26061196
  0.20880000   2.26061111
  0.20900000   2.26111402
  0.20900000   2.26111075
  0.20900000   2.26110773
  0.20900000   2.26110497
  0.20900000   2.26110243
  0.20900000   2.26110009
  0.20900000   2.26109791
  0.20900000   2.26109590
  0.20900000   2.26109402
  0.20900000   2.26109226
  0.20900000   2.26109062
  0.20900000   2.26108908
  0.20900000   2.26108763
  0.20900000   2.26108626
  0.20900000   2.26108497
  0.20900000   2.26108376
  0.20900000   2.26108260
  0.20900000   2.26108151
  0.20900000   2.26108047
  0.20900000   2.26107949
  0.20900000   2.26107855
  0.20900000   2.26107766
  0.20900000   2.26107680
  0.20920000   2.26157757
  0.20920000   2.26157430
  0.20920000   2.26157128
  0.20920000   2.26156852
  0.20920000   2.26156598
  0.20920000   2.26156363
  0.20920000   2.26156146
  0.20920000   2.26155944
  0.20920000   2.26155756
  0.20920000   2.26155580
  0.20920000   2.26155415
  0.20920000   2.26155261
  0.20920000   2.26155116
  0.20920000   2.26154979
  0.20920000   2.26154850
  0.20920000   2.26154728
  0.20920000   2.26154613
  0.20920000   2.26154504
  0.20920000   2.26154400
  0.20920000   2.26154301
  0.20920000   2.26154207
  0.20920000   2.26154118
  0.20920000   2.26154032
  0.20940000   2.26203897
  0.20940000   2.26203570
  0.20940000   2.26203267
  0.20940000   2.26202991
  0.20940000   2.26202736
  0.20940000   2.26202502
  0.20940000   2.26202284
  0.20940000   2.26202082
  0.20940000   2.26201893
  0.20940000   2.26201718
  0.20940000   2.26201553
  0.20940000   2.26201398
  0.20940000   2.26201253
  0.20940000   2.26201116
  0.20940000   2.26200987
  0.20940000   2.26200865
  0.20940000   2.26200750
  0.20940000   2.26200640
  0.20940000   2.26200536
  0.20940000   2.26200437
  0.20940000   2.26200343
  0.20940000   2.26200254
  0.20940000   2.26200168
  0.20960000   2.26249822
  0.20960000   2.26249495
  0.20960000   2.26249192
  0.20960000   2.26248916
  0.20960000   2.26248661
  0.20960000   2.26248426
  0.20960000   2.26248208
  0.20960000   2.26248006
  0.20960000   2.26247817
  0.20960000   2.26247641
  0.20960000   2.26247476
  0.20960000   2.26247321
  0.20960000   2.26247176
  0.20960000   2.26247039
  0.20960000   2.26246910
  0.20960000   2.26246788
  0.20960000   2.26246672
  0.20960000   2.26246562
  0.20960000   2.26246458
  0.20960000   2.26246359
  0.20960000   2.26246265
  0.20960000   2.26246175
  0.20960000   2.26246090
  0.20980000   2.26295534
  0.20980000   2.26295207
  0.20980000   2.26294903
  0.20980000   2.26294627
  0.20980000   2.26294372
  0.20980000   2.26294137
  0.20980000   2.26293919
  0.20980000   2.26293716
  0.20980000   2.26293527
  0.20980000   2.26293351
  0.20980000   2.26293186
  0.20980000   2.26293031
  0.20980000   2.26292886
  0.20980000   2.26292749
  0.20980000   2.26292619
  0.20980000   2.26292497
  0.20980000   2.26292381
  0.20980000   2.26292271
  0.20980000   2.26292167
  0.20980000   2.26292068
  0.20980000   2.26291974
  0.20980000   2.26291884
  0.20980000   2.26291798
  0.21000000   2.26341035
  0.21000000   2.26340707
  0.21000000   2.26340404
  0.21000000   2.26340127
  0.21000000   2.26339872
  0.21000000   2.26339636
  0.21000000   2.26339418
  0.21000000   2.26339215
  0.21000000   2.26339027
  0.21000000   2.26338850
  0.21000000   2.26338685
  0.21000000   2.26338530
  0.21000000   2.26338384
  0.21000000   2.26338247
  0.21000000   2.26338117
  0.21000000   2.26337995
  0.21000000   2.26337879
  0.21000000   2.26337769
  0.21000000   2.26337665
  0.21000000   2.26337566
  0.21000000   2.26337471
  0.21000000   2.26337381
  0.21000000   2.26337295
  0.21020000   2.26386326
  0.21020000   2.26385998
  0.21020000   2.26385694
  0.21020000   2.26385417
  0.21020000   2.26385162
  0.21020000   2.26384926
  0.21020000   2.26384708
  0.21020000   2.26384505
  0.21020000   2.26384315
  0.21020000   2.26384139
  0.21020000   2.26383973
  0.21020000   2.26383818
  0.21020000   2.26383672
  0.21020000   2.26383535
  0.21020000   2.26383405
  0.21020000   2.26383283
  0.21020000   2.26383167
  0.21020000   2.26383057
  0.21020000   2.26382952
  0.21020000   2.26382853
  0.21020000   2.26382758
  0.21020000   2.26382668
  0.21020000   2.26382582
  0.21040000   2.26431408
  0.21040000   2.26431079
  0.21040000   2.26430776
  0.21040000   2.26430499
  0.21040000   2.26430243
  0.21040000   2.26430007
  0.21040000   2.26429788
  0.21040000   2.26429585
  0.21040000   2.26429396
  0.21040000   2.26429219
  0.21040000   2.26429053
  0.21040000   2.26428898
  0.21040000   2.26428752
  0.21040000   2.26428614
  0.21040000   2.26428485
  0.21040000   2.26428362
  0.21040000   2.26428246
  0.21040000   2.26428135
  0.21040000   2.26428031
  0.21040000   2.26427931
  0.21040000   2.26427837
  0.21040000   2.26427747
  0.21040000   2.26427660
  0.21060000   2.26476284
  0.21060000   2.26475954
  0.21060000   2.26475650
  0.21060000   2.26475373
  0.21060000   2.26475117
  0.21060000   2.26474881
  0.21060000   2.26474662
  0.21060000   2.26474459
  0.21060000   2.26474269
  0.21060000   2.26474092
  0.21060000   2.26473926
  0.21060000   2.26473771
  0.21060000   2.26473625
  0.21060000   2.26473487
  0.21060000   2.26473357
  0.21060000   2.26473234
  0.21060000   2.26473118
  0.21060000   2.26473007
  0.21060000   2.26472903
  0.21060000   2.26472803
  0.21060000   2.26472708
  0.21060000   2.26472618
  0.21060000   2.26472532
  0.21080000   2.26520954
  0.21080000   2.26520622
  0.21080000   2.26520319
  0.21080000   2.26520041
  0.21080000   2.26519785
  0.21080000   2.26519549
  0.21080000   2.26519330
  0.21080000   2.26519126
  0.21080000   2.26518937
  0.21080000   2.26518759
  0.21080000   2.26518593
  0.21080000   2.26518438
  0.21080000   2.26518291
  0.21080000   2.26518153
  0.21080000   2.26518023
  0.21080000   2.26517900
  0.21080000   2.26517784
  0.21080000   2.26517673
  0.21080000   2.26517569
  0.21080000   2.26517469
  0.21080000   2.26517374
  0.21080000   2.26517283
  0.21080000   2.26517197
  0.21100000   2.26565420
  0.21100000   2.26565086
  0.21100000   2.26564784
  0.21100000   2.26564505
  0.21100000   2.26564249
  0.21100000   2.26564013
  0.21100000   2.26563793
  0.21100000   2.26563590
  0.21100000   2.26563400
  0.21100000   2.26563222
  0.21100000   2.26563056
  0.21100000   2.26562900
  0.21100000   2.26562754
  0.21100000   2.26562616
  0.21100000   2.26562485
  0.21100000   2.26562362
  0.21100000   2.26562246
  0.21100000   2.26562135
  0.21100000   2.26562030
  0.21100000   2.26561930
  0.21100000   2.26561835
  0.21100000   2.26561745
  0.21100000   2.26561658
  0.21120000   2.26609683
  0.21120000   2.26609348
  0.21120000   2.26609046
  0.21120000   2.26608766
  0.21120000   2.26608511
  0.21120000   2.26608273
  0.21120000   2.26608054
  0.21120000   2.26607850
  0.21120000   2.26607660
  0.21120000   2.26607482
  0.21120000   2.26607316
  0.21120000   2.26607160
  0.21120000   2.26607013
  0.21120000   2.26606875
  0.21120000   2.26606745
  0.21120000   2.26606621
  0.21120000   2.26606505
  0.21120000   2.26606394
  0.21120000   2.26606289
  0.21120000   2.26606189
  0.21120000   2.26606094
  0.21120000   2.26606003
  0.21120000   2.26605916
  0.21140000   2.26653745
  0.21140000   2.26653407
  0.21140000   2.26653106
  0.21140000   2.26652826
  0.21140000   2.26652570
  0.21140000   2.26652333
  0.21140000   2.26652113
  0.21140000   2.26651909
  0.21140000   2.26651719
  0.21140000   2.26651541
  0.21140000   2.26651375
  0.21140000   2.26651218
  0.21140000   2.26651071
  0.21140000   2.26650933
  0.21140000   2.26650802
  0.21140000   2.26650679
  0.21140000   2.26650562
  0.21140000   2.26650451
  0.21140000   2.26650346
  0.21140000   2.26650246
  0.21140000   2.26650151
  0.21140000   2.26650060
  0.21140000   2.26649973
  0.21160000   2.26697607
  0.21160000   2.26697266
  0.21160000   2.26696967
  0.21160000   2.26696685
  0.21160000   2.26696430
  0.21160000   2.26696192
  0.21160000   2.26695972
  0.21160000   2.26695768
  0.21160000   2.26695577
  0.21160000   2.26695399
  0.21160000   2.26695233
  0.21160000   2.26695076
  0.21160000   2.26694929
  0.21160000   2.26694791
  0.21160000   2.26694660
  0.21160000   2.26694536
  0.21160000   2.26694419
  0.21160000   2.26694308
  0.21160000   2.26694203
  0.21160000   2.26694103
  0.21160000   2.26694007
  0.21160000   2.26693917
  0.21160000   2.26693830
  0.21180000   2.26741272
  0.21180000   2.26740925
  0.21180000   2.26740629
  0.21180000   2.26740345
  0.21180000   2.26740091
  0.21180000   2.26739852
  0.21180000   2.26739632
  0.21180000   2.26739427
  0.21180000   2.26739237
  0.21180000   2.26739059
  0.21180000   2.26738892
  0.21180000   2.26738735
  0.21180000   2.26738588
  0.21180000   2.26738450
  0.21180000   2.26738319
  0.21180000   2.26738195
  0.21180000   2.26738078
  0.21180000   2.26737967
  0.21180000   2.26737861
  0.21180000   2.26737761
  0.21180000   2.26737665
  0.21180000   2.26737574
  0.21180000   2.26737487
  0.21200000   2.26784739
  0.21200000   2.26784387
  0.21200000   2.26784093
  0.21200000   2.26783808
  0.21200000   2.26783554
  0.21200000   2.26783315
  0.21200000   2.26783095
  0.21200000   2.26782890
  0.21200000   2.26782699
  0.21200000   2.26782521
  0.21200000   2.26782354
  0.21200000   2.26782197
  0.21200000   2.26782050
  0.21200000   2.26781911
  0.21200000   2.26781780
  0.21200000   2.26781656
  0.21200000   2.26781539
  0.21200000   2.26781427
  0.21200000   2.26781322
  0.21200000   2.26781221
  0.21200000   2.26781126
  0.21200000   2.26781035
  0.21200000   2.26780948
  0.21220000   2.26828011
  0.21220000   2.26827652
  0.21220000   2.26827362
  0.21220000   2.26827074
  0.21220000   2.26826821
  0.21220000   2.26826581
  0.21220000   2.26826362
  0.21220000   2.26826156
  0.21220000   2.26825966
  0.21220000   2.26825787
  0.21220000   2.26825620
  0.21220000   2.26825463
  0.21220000   2.26825315
  0.21220000   2.26825176
  0.21220000   2.26825045
  0.21220000   2.26824921
  0.21220000   2.26824804
  0.21220000   2.26824692
  0.21220000   2.26824586
  0.21220000   2.26824486
  0.21220000   2.26824390
  0.21220000   2.26824299
  0.21220000   2.26824212
  0.21240000   2.26871090
  0.21240000   2.26870722
  0.21240000   2.26870436
  0.21240000   2.26870146
  0.21240000   2.26869894
  0.21240000   2.26869653
  0.21240000   2.26869434
  0.21240000   2.26869228
  0.21240000   2.26869037
  0.21240000   2.26868858
  0.21240000   2.26868691
  0.21240000   2.26868534
  0.21240000   2.26868386
  0.21240000   2.26868247
  0.21240000   2.26868115
  0.21240000   2.26867991
  0.21240000   2.26867874
  0.21240000   2.26867762
  0.21240000   2.26867656
  0.21240000   2.26867556
  0.21240000   2.26867460
  0.21240000   2.26867368
  0.21240000   2.26867281
  0.21260000   2.26913975
  0.21260000   2.26913598
  0.21260000   2.26913318
  0.21260000   2.26913023
  0.21260000   2.26912774
  0.21260000   2.26912531
  0.21260000   2.26912312
  0.21260000   2.26912105
  0.21260000   2.26911915
  0.21260000   2.26911735
  0.21260000   2.26911568
  0.21260000   2.26911411
  0.21260000   2.26911263
  0.21260000   2.26911124
  0.21260000   2.26910992
  0.21260000   2.26910868
  0.21260000   2.26910750
  0.21260000   2.26910639
  0.21260000   2.26910533
  0.21260000   2.26910432
  0.21260000   2.26910336
  0.21260000   2.26910244
  0.21260000   2.26910157
  0.21280000   2.26956670
  0.21280000   2.26956281
  0.21280000   2.26956007
  0.21280000   2.26955709
  0.21280000   2.26955461
  0.21280000   2.26955216
  0.21280000   2.26954999
  0.21280000   2.26954791
  0.21280000   2.26954601
  0.21280000   2.26954421
  0.21280000   2.26954254
  0.21280000   2.26954096
  0.21280000   2.26953948
  0.21280000   2.26953808
  0.21280000   2.26953677
  0.21280000   2.26953552
  0.21280000   2.26953435
  0.21280000   2.26953323
  0.21280000   2.26953217
  0.21280000   2.26953116
  0.21280000   2.26953020
  0.21280000   2.26952928
  0.21280000   2.26952841
  0.21300000   2.26999176
  0.21300000   2.26998772
  0.21300000   2.26998506
  0.21300000   2.26998202
  0.21300000   2.26997958
  0.21300000   2.26997711
  0.21300000   2.26997494
  0.21300000   2.26997286
  0.21300000   2.26997096
  0.21300000   2.26996915
  0.21300000   2.26996748
  0.21300000   2.26996590
  0.21300000   2.26996442
  0.21300000   2.26996302
  0.21300000   2.26996171
  0.21300000   2.26996046
  0.21300000   2.26995928
  0.21300000   2.26995816
  0.21300000   2.26995710
  0.21300000   2.26995609
  0.21300000   2.26995512
  0.21300000   2.26995421
  0.21300000   2.26995333
  0.21320000   2.27041494
  0.21320000   2.27041072
  0.21320000   2.27040817
  0.21320000   2.27040506
  0.21320000   2.27040265
  0.21320000   2.27040016
  0.21320000   2.27039800
  0.21320000   2.27039591
  0.21320000   2.27039401
  0.21320000   2.27039220
  0.21320000   2.27039053
  0.21320000   2.27038895
  0.21320000   2.27038747
  0.21320000   2.27038607
  0.21320000   2.27038475
  0.21320000   2.27038350
  0.21320000   2.27038232
  0.21320000   2.27038120
  0.21320000   2.27038013
  0.21320000   2.27037912
  0.21320000   2.27037816
  0.21320000   2.27037724
  0.21320000   2.27037636
  0.21340000   2.27083625
  0.21340000   2.27083182
  0.21340000   2.27082939
  0.21340000   2.27082621
  0.21340000   2.27082384
  0.21340000   2.27082132
  0.21340000   2.27081918
  0.21340000   2.27081707
  0.21340000   2.27081518
  0.21340000   2.27081337
  0.21340000   2.27081169
  0.21340000   2.27081011
  0.21340000   2.27080863
  0.21340000   2.27080722
  0.21340000   2.27080590
  0.21340000   2.27080466
  0.21340000   2.27080347
  0.21340000   2.27080235
  0.21340000   2.27080129
  0.21340000   2.27080027
  0.21340000   2.27079931
  0.21340000   2.27079839
  0.21340000   2.27079751
  0.21360000   2.27125572
  0.21360000   2.27125104
  0.21360000   2.27124876
  0.21360000   2.27124548
  0.21360000   2.27124317
  0.21360000   2.27124061
  0.21360000   2.27123849
  0.21360000   2.27123637
  0.21360000   2.27123447
  0.21360000   2.27123266
  0.21360000   2.27123099
  0.21360000   2.27122940
  0.21360000   2.27122791
  0.21360000   2.27122651
  0.21360000   2.27122519
  0.21360000   2.27122394
  0.21360000   2.27122275
  0.21360000   2.27122163
  0.21360000   2.27122057
  0.21360000   2.27121955
  0.21360000   2.27121859
  0.21360000   2.27121766
  0.21360000   2.27121678
  0.21380000   2.27167336
  0.21380000   2.27166838
  0.21380000   2.27166628
  0.21380000   2.27166289
  0.21380000   2.27166064
  0.21380000   2.27165804
  0.21380000   2.27165594
  0.21380000   2.27165380
  0.21380000   2.27165192
  0.21380000   2.27165009
  0.21380000   2.27164842
  0.21380000   2.27164683
  0.21380000   2.27164535
  0.21380000   2.27164394
  0.21380000   2.27164262
  0.21380000   2.27164136
  0.21380000   2.27164018
  0.21380000   2.27163905
  0.21380000   2.27163799
  0.21380000   2.27163697
  0.21380000   2.27163600
  0.21380000   2.27163508
  0.21380000   2.27163420
  0.21400000   2.27208918
  0.21400000   2.27208385
  0.21400000   2.27208196
  0.21400000   2.27207844
  0.21400000   2.27207627
  0.21400000   2.27207362
  0.21400000   2.27207154
  0.21400000   2.27206938
  0.21400000   2.27206751
  0.21400000   2.27206568
  0.21400000   2.27206401
  0.21400000   2.27206241
  0.21400000   2.27206093
  0.21400000   2.27205952
  0.21400000   2.27205820
  0.21400000   2.27205694
  0.21400000   2.27205576
  0.21400000   2.27205463
  0.21400000   2.27205356
  0.21400000   2.27205254
  0.21400000   2.27205158
  0.21400000   2.27205065
  0.21400000   2.27204977
  0.21420000   2.27250321
  0.21420000   2.27249747
  0.21420000   2.27249583
  0.21420000   2.27249215
  0.21420000   2.27249007
  0.21420000   2.27248735
  0.21420000   2.27248532
  0.21420000   2.27248313
  0.21420000   2.27248127
  0.21420000   2.27247943
  0.21420000   2.27247776
  0.21420000   2.27247616
  0.21420000   2.27247468
  0.21420000   2.27247327
  0.21420000   2.27247194
  0.21420000   2.27247069
  0.21420000   2.27246950
  0.21420000   2.27246837
  0.21420000   2.27246730
  0.21420000   2.27246628
  0.21420000   2.27246531
  0.21420000   2.27246439
  0.21420000   2.27246351
  0.21440000   2.27291545
  0.21440000   2.27290923
  0.21440000   2.27290789
  0.21440000   2.27290402
  0.21440000   2.27290206
  0.21440000   2.27289927
  0.21440000   2.27289727
  0.21440000   2.27289506
  0.21440000   2.27289321
  0.21440000   2.27289135
  0.21440000   2.27288969
  0.21440000   2.27288809
  0.21440000   2.27288661
  0.21440000   2.27288519
  0.21440000   2.27288387
  0.21440000   2.27288261
  0.21440000   2.27288142
  0.21440000   2.27288029
  0.21440000   2.27287922
  0.21440000   2.27287820
  0.21440000   2.27287723
  0.21440000   2.27287630
  0.21440000   2.27287542
  0.21460000   2.27332594
  0.21460000   2.27331915
  0.21460000   2.27331816
  0.21460000   2.27331407
  0.21460000   2.27331224
  0.21460000   2.27330936
  0.21460000   2.27330742
  0.21460000   2.27330517
  0.21460000   2.27330334
  0.21460000   2.27330147
  0.21460000   2.27329982
  0.21460000   2.27329820
  0.21460000   2.27329672
  0.21460000   2.27329531
  0.21460000   2.27329398
  0.21460000   2.27329272
  0.21460000   2.27329153
  0.21460000   2.27329040
  0.21460000   2.27328933
  0.21460000   2.27328831
  0.21460000   2.27328733
  0.21460000   2.27328641
  0.21460000   2.27328552
  0.21480000   2.27373467
  0.21480000   2.27372724
  0.21480000   2.27372666
  0.21480000   2.27372230
  0.21480000   2.27372064
  0.21480000   2.27371765
  0.21480000   2.27371578
  0.21480000   2.27371348
  0.21480000   2.27371168
  0.21480000   2.27370979
  0.21480000   2.27370814
  0.21480000   2.27370652
  0.21480000   2.27370504
  0.21480000   2.27370362
  0.21480000   2.27370230
  0.21480000   2.27370103
  0.21480000   2.27369984
  0.21480000   2.27369871
  0.21480000   2.27369764
  0.21480000   2.27369661
  0.21480000   2.27369564
  0.21480000   2.27369471
  0.21480000   2.27369383
  0.21500000   2.27414169
  0.21500000   2.27413350
  0.21500000   2.27413340
  0.21500000   2.27412873
  0.21500000   2.27412726
  0.21500000   2.27412415
  0.21500000   2.27412235
  0.21500000   2.27412000
  0.21500000   2.27411823
  0.21500000   2.27411631
  0.21500000   2.27411468
  0.21500000   2.27411305
  0.21500000   2.27411158
  0.21500000   2.27411015
  0.21500000   2.27410882
  0.21500000   2.27410756
  0.21500000   2.27410637
  0.21500000   2.27410523
  0.21500000   2.27410416
  0.21500000   2.27410313
  0.21500000   2.27410216
  0.21500000   2.27410123
  0.21500000   2.27410034
  0.21520000   2.27454700
  0.21520000   2.27453794
  0.21520000   2.27453840
  0.21520000   2.27453336
  0.21520000   2.27453212
  0.21520000   2.27452886
  0.21520000   2.27452715
  0.21520000   2.27452474
  0.21520000   2.27452301
  0.21520000   2.27452107
  0.21520000   2.27451945
  0.21520000   2.27451780
  0.21520000   2.27451633
  0.21520000   2.27451490
  0.21520000   2.27451358
  0.21520000   2.27451231
  0.21520000   2.27451112
  0.21520000   2.27450998
  0.21520000   2.27450890
  0.21520000   2.27450788
  0.21520000   2.27450691
  0.21520000   2.27450597
  0.21520000   2.27450509
  0.21540000   2.27495062
  0.21540000   2.27494056
  0.21540000   2.27494166
  0.21540000   2.27493621
  0.21540000   2.27493524
  0.21540000   2.27493179
  0.21540000   2.27493020
  0.21540000   2.27492771
  0.21540000   2.27492602
  0.21540000   2.27492405
  0.21540000   2.27492245
  0.21540000   2.27492079
  0.21540000   2.27491933
  0.21540000   2.27491789
  0.21540000   2.27491657
  0.21540000   2.27491529
  0.21540000   2.27491410
  0.21540000   2.27491297
  0.21540000   2.27491189
  0.21540000   2.27491086
  0.21540000   2.27490989
  0.21540000   2.27490895
  0.21540000   2.27490807
  0.21560000   2.27535258
  0.21560000   2.27534137
  0.21560000   2.27534322
  0.21560000   2.27533727
  0.21560000   2.27533662
  0.21560000   2.27533296
  0.21560000   2.27533150
  0.21560000   2.27532893
  0.21560000   2.27532729
  0.21560000   2.27532528
  0.21560000   2.27532370
  0.21560000   2.27532203
  0.21560000   2.27532057
  0.21560000   2.27531912
  0.21560000   2.27531781
  0.21560000   2.27531653
  0.21560000   2.27531534
  0.21560000   2.27531420
  0.21560000   2.27531312
  0.21560000   2.27531209
  0.21560000   2.27531111
  0.21560000   2.27531018
  0.21560000   2.27530929
  0.21580000   2.27575291
  0.21580000   2.27574036
  0.21580000   2.27574309
  0.21580000   2.27573656
  0.21580000   2.27573628
  0.21580000   2.27573238
  0.21580000   2.27573108
  0.21580000   2.27572839
  0.21580000   2.27572683
  0.21580000   2.27572477
  0.21580000   2.27572322
  0.21580000   2.27572152
  0.21580000   2.27572008
  0.21580000   2.27571862
  0.21580000   2.27571730
  0.21580000   2.27571602
  0.21580000   2.27571483
  0.21580000   2.27571369
  0.21580000   2.27571261
  0.21580000   2.27571158
  0.21580000   2.27571060
  0.21580000   2.27570967
  0.21580000   2.27570878
  0.21600000   2.27615161
  0.21600000   2.27613755
  0.21600000   2.27614128
  0.21600000   2.27613408
  0.21600000   2.27613424
  0.21600000   2.27613005
  0.21600000   2.27612893
  0.21600000   2.27612612
  0.21600000   2.27612464
  0.21600000   2.27612252
  0.21600000   2.27612100
  0.21600000   2.27611928
  0.21600000   2.27611785
  0.21600000   2.27611638
  0.21600000   2.27611507
  0.21600000   2.27611378
  0.21600000   2.27611260
  0.21600000   2.27611145
  0.21600000   2.27611037
  0.21600000   2.27610934
  0.21600000   2.27610836
  0.21600000   2.27610743
  0.21600000   2.27610653
  0.21620000   2.27654872
  0.21620000   2.27653293
  0.21620000   2.27653781
  0.21620000   2.27652984
  0.21620000   2.27653051
  0.21620000   2.27652597
  0.21620000   2.27652509
  0.21620000   2.27652212
  0.21620000   2.27652073
  0.21620000   2.27651855
  0.21620000   2.27651707
  0.21620000   2.27651532
  0.21620000   2.27651391
  0.21620000   2.27651243
  0.21620000   2.27651112
  0.21620000   2.27650983
  0.21620000   2.27650864
  0.21620000   2.27650749
  0.21620000   2.27650642
  0.21620000   2.27650538
  0.21620000   2.27650440
  0.21620000   2.27650346
  0.21620000   2.27650257
  0.21640000   2.27694427
  0.21640000   2.27692651
  0.21640000   2.27693270
  0.21640000   2.27692385
  0.21640000   2.27692511
  0.21640000   2.27692017
  0.21640000   2.27691955
  0.21640000   2.27691640
  0.21640000   2.27691513
  0.21640000   2.27691287
  0.21640000   2.27691144
  0.21640000   2.27690965
  0.21640000   2.27690826
  0.21640000   2.27690676
  0.21640000   2.27690547
  0.21640000   2.27690417
  0.21640000   2.27690298
  0.21640000   2.27690183
  0.21640000   2.27690075
  0.21640000   2.27689971
  0.21640000   2.27689874
  0.21640000   2.27689780
  0.21640000   2.27689690
  0.21660000   2.27733828
  0.21660000   2.27731828
  0.21660000   2.27732598
  0.21660000   2.27731610
  0.21660000   2.27731805
  0.21660000   2.27731265
  0.21660000   2.27731233
  0.21660000   2.27730898
  0.21660000   2.27730784
  0.21660000   2.27730548
  0.21660000   2.27730412
  0.21660000   2.27730229
  0.21660000   2.27730092
  0.21660000   2.27729940
  0.21660000   2.27729812
  0.21660000   2.27729681
  0.21660000   2.27729563
  0.21660000   2.27729447
  0.21660000   2.27729339
  0.21660000   2.27729235
  0.21660000   2.27729137
  0.21660000   2.27729043
  0.21660000   2.27728954
  0.21680000   2.27773078
  0.21680000   2.27770823
  0.21680000   2.27771766
  0.21680000   2.27770661
  0.21680000   2.27770935
  0.21680000   2.27770340
  0.21680000   2.27770345
  0.21680000   2.27769985
  0.21680000   2.27769888
  0.21680000   2.27769641
  0.21680000   2.27769511
  0.21680000   2.27769323
  0.21680000   2.27769190
  0.21680000   2.27769035
  0.21680000   2.27768908
  0.21680000   2.27768776
  0.21680000   2.27768659
  0.21680000   2.27768542
  0.21680000   2.27768435
  0.21680000   2.27768330
  0.21680000   2.27768232
  0.21680000   2.27768138
  0.21680000   2.27768049
  0.21700000   2.27812180
  0.21700000   2.27809637
  0.21700000   2.27810777
  0.21700000   2.27809537
  0.21700000   2.27809902
  0.21700000   2.27809245
  0.21700000   2.27809292
  0.21700000   2.27808903
  0.21700000   2.27808825
  0.21700000   2.27808564
  0.21700000   2.27808444
  0.21700000   2.27808249
  0.21700000   2.27808120
  0.21700000   2.27807963
  0.21700000   2.27807837
  0.21700000   2.27807704
  0.21700000   2.27807587
  0.21700000   2.27807470
  0.21700000   2.27807363
  0.21700000   2.27807258
  0.21700000   2.27807160
  0.21700000   2.27807066
  0.21700000   2.27806976
  0.21720000   2.27851137
  0.21720000   2.27848269
  0.21720000   2.27849632
  0.21720000   2.27848238
  0.21720000   2.27848709
  0.21720000   2.27847979
  0.21720000   2.27848076
  0.21720000   2.27847652
  0.21720000   2.27847598
  0.21720000   2.27847321
  0.21720000   2.27847211
  0.21720000   2.27847009
  0.21720000   2.27846884
  0.21720000   2.27846723
  0.21720000   2.27846600
  0.21720000   2.27846465
  0.21720000   2.27846349
  0.21720000   2.27846231
  0.21720000   2.27846124
  0.21720000   2.27846019
  0.21720000   2.27845921
  0.21720000   2.27845827
  0.21720000   2.27845737
  0.21740000   2.27889952
  0.21740000   2.27886719
  0.21740000   2.27888335
  0.21740000   2.27886765
  0.21740000   2.27887357
  0.21740000   2.27886543
  0.21740000   2.27886697
  0.21740000   2.27886234
  0.21740000   2.27886206
  0.21740000   2.27885911
  0.21740000   2.27885814
  0.21740000   2.27885602
  0.21740000   2.27885484
  0.21740000   2.27885319
  0.21740000   2.27885198
  0.21740000   2.27885061
  0.21740000   2.27884946
  0.21740000   2.27884827
  0.21740000   2.27884721
  0.21740000   2.27884615
  0.21740000   2.27884517
  0.21740000   2.27884422
  0.21740000   2.27884333
  0.21760000   2.27928630
  0.21760000   2.27924984
  0.21760000   2.27926888
  0.21760000   2.27925117
  0.21760000   2.27925849
  0.21760000   2.27924938
  0.21760000   2.27925158
  0.21760000   2.27924648
  0.21760000   2.27924653
  0.21760000   2.27924335
  0.21760000   2.27924253
  0.21760000   2.27924031
  0.21760000   2.27923919
  0.21760000   2.27923749
  0.21760000   2.27923632
  0.21760000   2.27923492
  0.21760000   2.27923379
  0.21760000   2.27923258
  0.21760000   2.27923153
  0.21760000   2.27923046
  0.21760000   2.27922949
  0.21760000   2.27922854
  0.21760000   2.27922764
  0.21780000   2.27967173
  0.21780000   2.27963065
  0.21780000   2.27965293
  0.21780000   2.27963295
  0.21780000   2.27964185
  0.21780000   2.27963163
  0.21780000   2.27963461
  0.21780000   2.27962896
  0.21780000   2.27962938
  0.21780000   2.27962594
  0.21780000   2.27962530
  0.21780000   2.27962295
  0.21780000   2.27962192
  0.21780000   2.27962016
  0.21780000   2.27961903
  0.21780000   2.27961759
  0.21780000   2.27961648
  0.21780000   2.27961526
  0.21780000   2.27961422
  0.21780000   2.27961315
  0.21780000   2.27961217
  0.21780000   2.27961122
  0.21780000   2.27961032
  0.21800000   2.28005586
  0.21800000   2.28000960
  0.21800000   2.28003554
  0.21800000   2.28001297
  0.21800000   2.28002369
  0.21800000   2.28001218
  0.21800000   2.28001606
  0.21800000   2.28000979
  0.21800000   2.28001064
  0.21800000   2.28000689
  0.21800000   2.28000646
  0.21800000   2.28000396
  0.21800000   2.28000304
  0.21800000   2.28000120
  0.21800000   2.28000012
  0.21800000   2.27999865
  0.21800000   2.27999756
  0.21800000   2.27999632
  0.21800000   2.27999528
  0.21800000   2.27999420
  0.21800000   2.27999324
  0.21800000   2.27999227
  0.21800000   2.27999138
  0.21820000   2.28043874
  0.21820000   2.28038667
  0.21820000   2.28041673
  0.21820000   2.28039123
  0.21820000   2.28040402
  0.21820000   2.28039105
  0.21820000   2.28039596
  0.21820000   2.28038895
  0.21820000   2.28039032
  0.21820000   2.28038620
  0.21820000   2.28038603
  0.21820000   2.28038335
  0.21820000   2.28038255
  0.21820000   2.28038062
  0.21820000   2.28037960
  0.21820000   2.28037809
  0.21820000   2.28037703
  0.21820000   2.28037576
  0.21820000   2.28037474
  0.21820000   2.28037365
  0.21820000   2.28037269
  0.21820000   2.28037172
  0.21820000   2.28037083
  0.21840000   2.28082039
  0.21840000   2.28076185
  0.21840000   2.28079654
  0.21840000   2.28076773
  0.21840000   2.28078288
  0.21840000   2.28076822
  0.21840000   2.28077433
  0.21840000   2.28076647
  0.21840000   2.28076844
  0.21840000   2.28076389
  0.21840000   2.28076402
  0.21840000   2.28076112
  0.21840000   2.28076047
  0.21840000   2.28075843
  0.21840000   2.28075748
  0.21840000   2.28075592
  0.21840000   2.28075489
  0.21840000   2.28075360
  0.21840000   2.28075260
  0.21840000   2.28075149
  0.21840000   2.28075054
  0.21840000   2.28074956
  0.21840000   2.28074868
  0.21860000   2.28120087
  0.21860000   2.28113512
  0.21860000   2.28117500
  0.21860000   2.28114245
  0.21860000   2.28116028
  0.21860000   2.28114370
  0.21860000   2.28115117
  0.21860000   2.28114234
  0.21860000   2.28114500
  0.21860000   2.28113996
  0.21860000   2.28114043
  0.21860000   2.28113729
  0.21860000   2.28113681
  0.21860000   2.28113465
  0.21860000   2.28113378
  0.21860000   2.28113215
  0.21860000   2.28113117
  0.21860000   2.28112985
  0.21860000   2.28112887
  0.21860000   2.28112774
  0.21860000   2.28112680
  0.21860000   2.28112581
  0.21860000   2.28112493
  0.21880000   2.28158023
  0.21880000   2.28150645
  0.21880000   2.28155214
  0.21880000   2.28151540
  0.21880000   2.28153624
  0.21880000   2.28151749
  0.21880000   2.28152652
  0.21880000   2.28151656
  0.21880000   2.28152003
  0.21880000   2.28151440
  0.21880000   2.28151529
  0.21880000   2.28151185
  0.21880000   2.28151158
  0.21880000   2.28150926
  0.21880000   2.28150851
  0.21880000   2.28150680
  0.21880000   2.28150587
  0.21880000   2.28150451
  0.21880000   2.28150355
  0.21880000   2.28150241
  0.21880000   2.28150148
  0.21880000   2.28150048
  0.21880000   2.28149961
  0.21900000   2.28195852
  0.21900000   2.28187583
  0.21900000   2.28192801
  0.21900000   2.28188654
  0.21900000   2.28191081
  0.21900000   2.28188957
  0.21900000   2.28190040
  0.21900000   2.28188914
  0.21900000   2.28189354
  0.21900000   2.28188724
  0.21900000   2.28188861
  0.21900000   2.28188482
  0.21900000   2.28188480
  0.21900000   2.28188230
  0.21900000   2.28188167
  0.21900000   2.28187987
  0.21900000   2.28187901
  0.21900000   2.28187760
  0.21900000   2.28187667
  0.21900000   2.28187550
  0.21900000   2.28187459
  0.21900000   2.28187358
  0.21900000   2.28187271
  0.21920000   2.28233579
  0.21920000   2.28224323
  0.21920000   2.28230264
  0.21920000   2.28225587
  0.21920000   2.28228401
  0.21920000   2.28225995
  0.21920000   2.28227282
  0.21920000   2.28226007
  0.21920000   2.28226555
  0.21920000   2.28225846
  0.21920000   2.28226040
  0.21920000   2.28225620
  0.21920000   2.28225647
  0.21920000   2.28225376
  0.21920000   2.28225328
  0.21920000   2.28225137
  0.21920000   2.28225058
  0.21920000   2.28224912
  0.21920000   2.28224823
  0.21920000   2.28224703
  0.21920000   2.28224614
  0.21920000   2.28224511
  0.21920000   2.28224425
  0.21940000   2.28271210
  0.21940000   2.28260861
  0.21940000   2.28267607
  0.21940000   2.28262338
  0.21940000   2.28265586
  0.21940000   2.28262861
  0.21940000   2.28264382
  0.21940000   2.28262936
  0.21940000   2.28263608
  0.21940000   2.28262809
  0.21940000   2.28263068
  0.21940000   2.28262599
  0.21940000   2.28262662
  0.21940000   2.28262365
  0.21940000   2.28262335
  0.21940000   2.28262131
  0.21940000   2.28262062
  0.21940000   2.28261908
  0.21940000   2.28261824
  0.21940000   2.28261700
  0.21940000   2.28261613
  0.21940000   2.28261508
  0.21940000   2.28261424
  0.21960000   2.28308749
  0.21960000   2.28297195
  0.21960000   2.28304835
  0.21960000   2.28298904
  0.21960000   2.28302641
  0.21960000   2.28299555
  0.21960000   2.28301341
  0.21960000   2.28299699
  0.21960000   2.28300515
  0.21960000   2.28299610
  0.21960000   2.28299946
  0.21960000   2.28299421
  0.21960000   2.28299525
  0.21960000   2.28299197
  0.21960000   2.28299190
  0.21960000   2.28298969
  0.21960000   2.28298911
  0.21960000   2.28298749
  0.21960000   2.28298671
  0.21960000   2.28298543
  0.21960000   2.28298459
  0.21960000   2.28298352
  0.21960000   2.28298269
  0.21980000   2.28346205
  0.21980000   2.28333321
  0.21980000   2.28341952
  0.21980000   2.28335283
  0.21980000   2.28339568
  0.21980000   2.28336075
  0.21980000   2.28338162
  0.21980000   2.28336298
  0.21980000   2.28337278
  0.21980000   2.28336251
  0.21980000   2.28336677
  0.21980000   2.28336086
  0.21980000   2.28336237
  0.21980000   2.28335874
  0.21980000   2.28335893
  0.21980000   2.28335653
  0.21980000   2.28335609
  0.21980000   2.28335436
  0.21980000   2.28335366
  0.21980000   2.28335232
  0.21980000   2.28335152
  0.21980000   2.28335042
  0.21980000   2.28334961
  0.22000000   2.28383581
  0.22000000   2.28369236
  0.22000000   2.28378964
  0.22000000   2.28371473
  0.22000000   2.28376372
  0.22000000   2.28372421
  0.22000000   2.28374849
  0.22000000   2.28372730
  0.22000000   2.28373898
  0.22000000   2.28372732
  0.22000000   2.28373261
  0.22000000   2.28372593
  0.22000000   2.28372801
  0.22000000   2.28372396
  0.22000000   2.28372445
  0.22000000   2.28372182
  0.22000000   2.28372155
  0.22000000   2.28371970
  0.22000000   2.28371908
  0.22000000   2.28371768
  0.22000000   2.28371692
  0.22000000   2.28371579
  0.22000000   2.28371500
  0.22020000   2.28420886
  0.22020000   2.28404935
  0.22020000   2.28415875
  0.22020000   2.28407471
  0.22020000   2.28413056
  0.22020000   2.28408590
  0.22020000   2.28411403
  0.22020000   2.28408996
  0.22020000   2.28410379
  0.22020000   2.28409053
  0.22020000   2.28409701
  0.22020000   2.28408944
  0.22020000   2.28409217
  0.22020000   2.28408764
  0.22020000   2.28408849
  0.22020000   2.28408559
  0.22020000   2.28408551
  0.22020000   2.28408351
  0.22020000   2.28408300
  0.22020000   2.28408151
  0.22020000   2.28408082
  0.22020000   2.28407964
  0.22020000   2.28407889
  0.22040000   2.28458125
  0.22040000   2.28440416
  0.22040000   2.28452691
  0.22040000   2.28443275
  0.22040000   2.28449625
  0.22040000   2.28444581
  0.22040000   2.28447829
  0.22040000   2.28445095
  0.22040000   2.28446723
  0.22040000   2.28445212
  0.22040000   2.28445998
  0.22040000   2.28445138
  0.22040000   2.28445488
  0.22040000   2.28444977
  0.22040000   2.28445105
  0.22040000   2.28444782
  0.22040000   2.28444799
  0.22040000   2.28444581
  0.22040000   2.28444543
  0.22040000   2.28444384
  0.22040000   2.28444322
  0.22040000   2.28444198
  0.22040000   2.28444127
  0.22060000   2.28495306
  0.22060000   2.28475673
  0.22060000   2.28489417
  0.22060000   2.28478881
  0.22060000   2.28486082
  0.22060000   2.28480392
  0.22060000   2.28484129
  0.22060000   2.28481024
  0.22060000   2.28482932
  0.22060000   2.28481210
  0.22060000   2.28482155
  0.22060000   2.28481175
  0.22060000   2.28481615
  0.22060000   2.28481036
  0.22060000   2.28481214
  0.22060000   2.28480854
  0.22060000   2.28480899
  0.22060000   2.28480659
  0.22060000   2.28480637
  0.22060000   2.28480467
  0.22060000   2.28480413
  0.22060000   2.28480283
  0.22060000   2.28480216
  0.22080000   2.28532434
  0.22080000   2.28510702
  0.22080000   2.28526059
  0.22080000   2.28514286
  0.22080000   2.28522433
  0.22080000   2.28516020
  0.22080000   2.28520308
  0.22080000   2.28516784
  0.22080000   2.28519010
  0.22080000   2.28517047
  0.22080000   2.28518173
  0.22080000   2.28517055
  0.22080000   2.28517599
  0.22080000   2.28516942
  0.22080000   2.28517179
  0.22080000   2.28516774
  0.22080000   2.28516852
  0.22080000   2.28516587
  0.22080000   2.28516584
  0.22080000   2.28516399
  0.22080000   2.28516356
  0.22080000   2.28516218
  0.22080000   2.28516157
  0.22100000   2.28569517
  0.22100000   2.28545498
  0.22100000   2.28562622
  0.22100000   2.28549487
  0.22100000   2.28558681
  0.22100000   2.28551464
  0.22100000   2.28556368
  0.22100000   2.28552373
  0.22100000   2.28554958
  0.22100000   2.28552720
  0.22100000   2.28554056
  0.22100000   2.28552779
  0.22100000   2.28553443
  0.22100000   2.28552694
  0.22100000   2.28553001
  0.22100000   2.28552543
  0.22100000   2.28552661
  0.22100000   2.28552366
  0.22100000   2.28552385
  0.22100000   2.28552183
  0.22100000   2.28552153
  0.22100000   2.28552004
  0.22100000   2.28551951
  0.22120000   2.28606562
  0.22120000   2.28580057
  0.22120000   2.28599113
  0.22120000   2.28584480
  0.22120000   2.28594833
  0.22120000   2.28586721
  0.22120000   2.28592314
  0.22120000   2.28587789
  0.22120000   2.28590780
  0.22120000   2.28588230
  0.22120000   2.28589805
  0.22120000   2.28588345
  0.22120000   2.28589149
  0.22120000   2.28588293
  0.22120000   2.28588681
  0.22120000   2.28588161
  0.22120000   2.28588325
  0.22120000   2.28587994
  0.22120000   2.28588041
  0.22120000   2.28587818
  0.22120000   2.28587803
  0.22120000   2.28587643
  0.22120000   2.28587598
  0.22140000   2.28643575
  0.22140000   2.28614375
  0.22140000   2.28635538
  0.22140000   2.28619262
  0.22140000   2.28630892
  0.22140000   2.28621788
  0.22140000   2.28628149
  0.22140000   2.28623029
  0.22140000   2.28626480
  0.22140000   2.28623576
  0.22140000   2.28625423
  0.22140000   2.28623753
  0.22140000   2.28624718
  0.22140000   2.28623738
  0.22140000   2.28624221
  0.22140000   2.28623628
  0.22140000   2.28623848
  0.22140000   2.28623474
  0.22140000   2.28623553
  0.22140000   2.28623305
  0.22140000   2.28623310
  0.22140000   2.28623135
  0.22140000   2.28623101
  0.22160000   2.28680564
  0.22160000   2.28648445
  0.22160000   2.28671902
  0.22160000   2.28653827
  0.22160000   2.28666865
  0.22160000   2.28656662
  0.22160000   2.28663879
  0.22160000   2.28658093
  0.22160000   2.28662061
  0.22160000   2.28658755
  0.22160000   2.28660913
  0.22160000   2.28659003
  0.22160000   2.28660153
  0.22160000   2.28659030
  0.22160000   2.28659622
  0.22160000   2.28658945
  0.22160000   2.28659230
  0.22160000   2.28658806
  0.22160000   2.28658923
  0.22160000   2.28658646
  0.22160000   2.28658672
  0.22160000   2.28658480
  0.22160000   2.28658459
  0.22180000   2.28717533
  0.22180000   2.28682265
  0.22180000   2.28708213
  0.22180000   2.28688173
  0.22180000   2.28702756
  0.22180000   2.28691340
  0.22180000   2.28699507
  0.22180000   2.28692978
  0.22180000   2.28697526
  0.22180000   2.28693768
  0.22180000   2.28696277
  0.22180000   2.28694093
  0.22180000   2.28695456
  0.22180000   2.28694167
  0.22180000   2.28694887
  0.22180000   2.28694111
  0.22180000   2.28694472
  0.22180000   2.28693990
  0.22180000   2.28694152
  0.22180000   2.28693839
  0.22180000   2.28693893
  0.22180000   2.28693680
  0.22180000   2.28693675
  0.22200000   2.28754489
  0.22200000   2.28715829
  0.22200000   2.28744476
  0.22200000   2.28722295
  0.22200000   2.28738572
  0.22200000   2.28725818
  0.22200000   2.28735039
  0.22200000   2.28727680
  0.22200000   2.28732879
  0.22200000   2.28728611
  0.22200000   2.28731519
  0.22200000   2.28729023
  0.22200000   2.28730629
  0.22200000   2.28729151
  0.22200000   2.28730018
  0.22200000   2.28729127
  0.22200000   2.28729577
  0.22200000   2.28729025
  0.22200000   2.28729241
  0.22200000   2.28728887
  0.22200000   2.28728973
  0.22200000   2.28728734
  0.22200000   2.28728749
  0.22220000   2.28791438
  0.22220000   2.28749134
  0.22220000   2.28780696
  0.22220000   2.28756189
  0.22220000   2.28774317
  0.22220000   2.28760094
  0.22220000   2.28770479
  0.22220000   2.28762199
  0.22220000   2.28768124
  0.22220000   2.28763283
  0.22220000   2.28766642
  0.22220000   2.28763791
  0.22220000   2.28765675
  0.22220000   2.28763979
  0.22220000   2.28765017
  0.22220000   2.28763992
  0.22220000   2.28764547
  0.22220000   2.28763913
  0.22220000   2.28764193
  0.22220000   2.28763788
  0.22220000   2.28763913
  0.22220000   2.28763644
  0.22220000   2.28763682
  0.22240000   2.28828384
  0.22240000   2.28782176
  0.22240000   2.28816879
  0.22240000   2.28789852
  0.22240000   2.28809997
  0.22240000   2.28794163
  0.22240000   2.28805831
  0.22240000   2.28796531
  0.22240000   2.28803266
  0.22240000   2.28797782
  0.22240000   2.28801649
  0.22240000   2.28798397
  0.22240000   2.28800598
  0.22240000   2.28798651
  0.22240000   2.28799886
  0.22240000   2.28798706
  0.22240000   2.28799382
  0.22240000   2.28798653
  0.22240000   2.28799007
  0.22240000   2.28798544
  0.22240000   2.28798714
  0.22240000   2.28798410
  0.22240000   2.28798475
  0.22260000   2.28865330
  0.22260000   2.28814951
  0.22260000   2.28853031
  0.22260000   2.28823279
  0.22260000   2.28845617
  0.22260000   2.28828022
  0.22260000   2.28841101
  0.22260000   2.28830672
  0.22260000   2.28838308
  0.22260000   2.28832107
  0.22260000   2.28836544
  0.22260000   2.28832838
  0.22260000   2.28835399
  0.22260000   2.28833167
  0.22260000   2.28834627
  0.22260000   2.28833269
  0.22260000   2.28834086
  0.22260000   2.28833245
  0.22260000   2.28833687
  0.22260000   2.28833155
  0.22260000   2.28833379
  0.22260000   2.28833031
  0.22260000   2.28833131
  0.22280000   2.28902280
  0.22280000   2.28847458
  0.22280000   2.28889157
  0.22280000   2.28856468
  0.22280000   2.28881183
  0.22280000   2.28861668
  0.22280000   2.28876294
  0.22280000   2.28864621
  0.22280000   2.28873255
  0.22280000   2.28866254
  0.22280000   2.28871330
  0.22280000   2.28867114
  0.22280000   2.28870081
  0.22280000   2.28867525
  0.22280000   2.28869243
  0.22280000   2.28867680
  0.22280000   2.28868659
  0.22280000   2.28867689
  0.22280000   2.28868233
  0.22280000   2.28867620
  0.22280000   2.28867908
  0.22280000   2.28867510
  0.22280000   2.28867649
  0.22300000   2.28939235
  0.22300000   2.28879696
  0.22300000   2.28925259
  0.22300000   2.28889415
  0.22300000   2.28916699
  0.22300000   2.28895098
  0.22300000   2.28911413
  0.22300000   2.28898375
  0.22300000   2.28908110
  0.22300000   2.28900221
  0.22300000   2.28906012
  0.22300000   2.28901221
  0.22300000   2.28904649
  0.22300000   2.28901724
  0.22300000   2.28903737
  0.22300000   2.28901937
  0.22300000   2.28903105
  0.22300000   2.28901985
  0.22300000   2.28902648
  0.22300000   2.28901940
  0.22300000   2.28902304
  0.22300000   2.28901845
  0.22300000   2.28902032
  0.22320000   2.28976194
  0.22320000   2.28911664
  0.22320000   2.28961341
  0.22320000   2.28922119
  0.22320000   2.28952170
  0.22320000   2.28928309
  0.22320000   2.28946465
  0.22320000   2.28931929
  0.22320000   2.28942880
  0.22320000   2.28934006
  0.22320000   2.28940593
  0.22320000   2.28935160
  0.22320000   2.28939104
  0.22320000   2.28935763
  0.22320000   2.28938111
  0.22320000   2.28936042
  0.22320000   2.28937425
  0.22320000   2.28936132
  0.22320000   2.28936934
  0.22320000   2.28936114
  0.22320000   2.28936567
  0.22320000   2.28936037
  0.22320000   2.28936280
  0.22340000   2.29013155
  0.22340000   2.28943365
  0.22340000   2.28997404
  0.22340000   2.28954578
  0.22340000   2.28987598
  0.22340000   2.28961298
  0.22340000   2.28981453
  0.22340000   2.28965283
  0.22340000   2.28977566
  0.22340000   2.28967607
  0.22340000   2.28975076
  0.22340000   2.28968926
  0.22340000   2.28973452
  0.22340000   2.28969640
  0.22340000   2.28972368
  0.22340000   2.28969992
  0.22340000   2.28971622
  0.22340000   2.28970130
  0.22340000   2.28971092
  0.22340000   2.28970143
  0.22340000   2.28970699
  0.22340000   2.28970086
  0.22340000   2.28970396
  0.22360000   2.29050115
  0.22360000   2.28974801
  0.22360000   2.29033449
  0.22360000   2.28986792
  0.22360000   2.29022987
  0.22360000   2.28994064
  0.22360000   2.29016381
  0.22360000   2.28998433
  0.22360000   2.29012175
  0.22360000   2.29001021
  0.22360000   2.29009466
  0.22360000   2.29002519
  0.22360000   2.29007694
  0.22360000   2.29003354
  0.22360000   2.29006511
  0.22360000   2.29003786
  0.22360000   2.29005699
  0.22360000   2.29003977
  0.22360000   2.29005125
  0.22360000   2.29004026
  0.22360000   2.29004703
  0.22360000   2.29003992
  0.22360000   2.29004381
  0.22380000   2.29087064
  0.22380000   2.29005978
  0.22380000   2.29069474
  0.22380000   2.29018763
  0.22380000   2.29058338
  0.22380000   2.29026606
  0.22380000   2.29051251
  0.22380000   2.29031378
  0.22380000   2.29046708
  0.22380000   2.29034246
  0.22380000   2.29043766
  0.22380000   2.29035937
  0.22380000   2.29041835
  0.22380000   2.29036902
  0.22380000   2.29040543
  0.22380000   2.29037423
  0.22380000   2.29039658
  0.22380000   2.29037674
  0.22380000   2.29039034
  0.22380000   2.29037763
  0.22380000   2.29038580
  0.22380000   2.29037755
  0.22380000   2.29038236
  0.22400000   2.29123994
  0.22400000   2.29036904
  0.22400000   2.29105475
  0.22400000   2.29050494
  0.22400000   2.29093651
  0.22400000   2.29058924
  0.22400000   2.29086067
  0.22400000   2.29064116
  0.22400000   2.29081171
  0.22400000   2.29067280
  0.22400000   2.29077981
  0.22400000   2.29069177
  0.22400000   2.29075877
  0.22400000   2.29070285
  0.22400000   2.29074467
  0.22400000   2.29070903
  0.22400000   2.29073502
  0.22400000   2.29071219
  0.22400000   2.29072824
  0.22400000   2.29071352
  0.22400000   2.29072332
  0.22400000   2.29071375
  0.22400000   2.29071963
  0.22420000   2.29160891
  0.22420000   2.29067592
  0.22420000   2.29141447
  0.22420000   2.29081990
  0.22420000   2.29128925
  0.22420000   2.29091019
  0.22420000   2.29120829
  0.22420000   2.29096647
  0.22420000   2.29115564
  0.22420000   2.29100122
  0.22420000   2.29112112
  0.22420000   2.29102238
  0.22420000   2.29109824
  0.22420000   2.29103499
  0.22420000   2.29108287
  0.22420000   2.29104223
  0.22420000   2.29107233
  0.22420000   2.29104612
  0.22420000   2.29106494
  0.22420000   2.29104795
  0.22420000   2.29105962
  0.22420000   2.29104850
  0.22420000   2.29105565
  0.22440000   2.29197735
  0.22440000   2.29098054
  0.22440000   2.29177379
  0.22440000   2.29113259
  0.22440000   2.29164157
  0.22440000   2.29122896
  0.22440000   2.29155537
  0.22440000   2.29128972
  0.22440000   2.29149889
  0.22440000   2.29132771
  0.22440000   2.29146163
  0.22440000   2.29135120
  0.22440000   2.29143679
  0.22440000   2.29136544
  0.22440000   2.29142004
  0.22440000   2.29137382
  0.22440000   2.29140854
  0.22440000   2.29137851
  0.22440000   2.29140049
  0.22440000   2.29138089
  0.22440000   2.29139470
  0.22440000   2.29138182
  0.22440000   2.29139042
  0.22460000   2.29234505
  0.22460000   2.29128312
  0.22460000   2.29213258
  0.22460000   2.29144311
  0.22460000   2.29199339
  0.22460000   2.29154559
  0.22460000   2.29190190
  0.22460000   2.29161092
  0.22460000   2.29184149
  0.22460000   2.29165228
  0.22460000   2.29180135
  0.22460000   2.29167820
  0.22460000   2.29177445
  0.22460000   2.29169418
  0.22460000   2.29175622
  0.22460000   2.29170380
  0.22460000   2.29174368
  0.22460000   2.29170936
  0.22460000   2.29173490
  0.22460000   2.29171234
  0.22460000   2.29172861
  0.22460000   2.29171369
  0.22460000   2.29172397
  0.22480000   2.29271172
  0.22480000   2.29158387
  0.22480000   2.29249069
  0.22480000   2.29175160
  0.22480000   2.29234463
  0.22480000   2.29186016
  0.22480000   2.29224782
  0.22480000   2.29193013
  0.22480000   2.29218340
  0.22480000   2.29197494
  0.22480000   2.29214029
  0.22480000   2.29200340
  0.22480000   2.29211122
  0.22480000   2.29202122
  0.22480000   2.29209143
  0.22480000   2.29203216
  0.22480000   2.29207778
  0.22480000   2.29203865
  0.22480000   2.29206820
  0.22480000   2.29204229
  0.22480000   2.29206135
  0.22480000   2.29204411
  0.22480000   2.29205632
  0.22500000   2.29307701
  0.22500000   2.29188310
  0.22500000   2.29284789
  0.22500000   2.29205826
  0.22500000   2.29269516
  0.22500000   2.29217279
  0.22500000   2.29259308
  0.22500000   2.29224739
  0.22500000   2.29252461
  0.22500000   2.29229572
  0.22500000   2.29247845
  0.22500000   2.29232680
  0.22500000   2.29244713
  0.22500000   2.29234655
  0.22500000   2.29242569
  0.22500000   2.29235888
  0.22500000   2.29241084
  0.22500000   2.29236638
  0.22500000   2.29240041
  0.22500000   2.29237074
  0.22500000   2.29239294
  0.22500000   2.29237307
  0.22500000   2.29238748
  0.22520000   2.29344051
  0.22520000   2.29218117
  0.22520000   2.29320390
  0.22520000   2.29236332
  0.22520000   2.29304480
  0.22520000   2.29248362
  0.22520000   2.29293757
  0.22520000   2.29256280
  0.22520000   2.29286506
  0.22520000   2.29261467
  0.22520000   2.29281582
  0.22520000   2.29264843
  0.22520000   2.29278217
  0.22520000   2.29267017
  0.22520000   2.29275901
  0.22520000   2.29268398
  0.22520000   2.29274290
  0.22520000   2.29269256
  0.22520000   2.29273155
  0.22520000   2.29269769
  0.22520000   2.29272342
  0.22520000   2.29270058
  0.22520000   2.29271748
  0.22540000   2.29380173
  0.22540000   2.29247849
  0.22540000   2.29355839
  0.22540000   2.29266706
  0.22540000   2.29339334
  0.22540000   2.29279284
  0.22540000   2.29328115
  0.22540000   2.29287648
  0.22540000   2.29320468
  0.22540000   2.29293186
  0.22540000   2.29315234
  0.22540000   2.29296832
  0.22540000   2.29311633
  0.22540000   2.29299212
  0.22540000   2.29309139
  0.22540000   2.29300746
  0.22540000   2.29307395
  0.22540000   2.29301717
  0.22540000   2.29306163
  0.22540000   2.29302313
  0.22540000   2.29305278
  0.22540000   2.29302662
  0.22540000   2.29304633
  0.22560000   2.29416008
  0.22560000   2.29277558
  0.22560000   2.29391095
  0.22560000   2.29296985
  0.22560000   2.29374049
  0.22560000   2.29310069
  0.22560000   2.29362365
  0.22560000   2.29318858
  0.22560000   2.29354334
  0.22560000   2.29324740
  0.22560000   2.29348795
  0.22560000   2.29328655
  0.22560000   2.29344957
  0.22560000   2.29331243
  0.22560000   2.29342281
  0.22560000   2.29332934
  0.22560000   2.29340401
  0.22560000   2.29334023
  0.22560000   2.29339066
  0.22560000   2.29334707
  0.22560000   2.29338106
  0.22560000   2.29335120
  0.22560000   2.29337405
  0.22580000   2.29451487
  0.22580000   2.29307304
  0.22580000   2.29426108
  0.22580000   2.29327211
  0.22580000   2.29408592
  0.22580000   2.29340749
  0.22580000   2.29396482
  0.22580000   2.29349932
  0.22580000   2.29388090
  0.22580000   2.29356142
  0.22580000   2.29382257
  0.22580000   2.29360321
  0.22580000   2.29378184
  0.22580000   2.29363115
  0.22580000   2.29375326
  0.22580000   2.29364966
  0.22580000   2.29373305
  0.22580000   2.29366176
  0.22580000   2.29371864
  0.22580000   2.29366952
  0.22580000   2.29370825
  0.22580000   2.29367433
  0.22580000   2.29370065
  0.22600000   2.29486531
  0.22600000   2.29337158
  0.22600000   2.29460819
  0.22600000   2.29357437
  0.22600000   2.29442919
  0.22600000   2.29371359
  0.22600000   2.29430437
  0.22600000   2.29380896
  0.22600000   2.29421716
  0.22600000   2.29387410
  0.22600000   2.29415604
  0.22600000   2.29391840
  0.22600000   2.29411305
  0.22600000   2.29394836
  0.22600000   2.29408267
  0.22600000   2.29396846
  0.22600000   2.29406106
  0.22600000   2.29398179
  0.22600000   2.29404557
  0.22600000   2.29399049
  0.22600000   2.29403435
  0.22600000   2.29399602
  0.22600000   2.29402613
  0.22620000   2.29521049
  0.22620000   2.29367201
  0.22620000   2.29495160
  0.22620000   2.29387724
  0.22620000   2.29476979
  0.22620000   2.29401946
  0.22620000   2.29464193
  0.22620000   2.29411783
  0.22620000   2.29455184
  0.22620000   2.29418568
  0.22620000   2.29448820
  0.22620000   2.29423230
  0.22620000   2.29444309
  0.22620000   2.29426418
  0.22620000   2.29441098
  0.22620000   2.29428583
  0.22620000   2.29438798
  0.22620000   2.29430038
  0.22620000   2.29437141
  0.22620000   2.29431003
  0.22620000   2.29435935
  0.22620000   2.29431629
  0.22620000   2.29435049
  0.22640000   2.29554935
  0.22640000   2.29397528
  0.22640000   2.29529048
  0.22640000   2.29418144
  0.22640000   2.29510710
  0.22640000   2.29432565
  0.22640000   2.29497704
  0.22640000   2.29442633
  0.22640000   2.29488462
  0.22640000   2.29449645
  0.22640000   2.29481880
  0.22640000   2.29454513
  0.22640000   2.29477178
  0.22640000   2.29457877
  0.22640000   2.29473806
  0.22640000   2.29460187
  0.22640000   2.29471375
  0.22640000   2.29461759
  0.22640000   2.29469612
  0.22640000   2.29462817
  0.22640000   2.29468323
  0.22640000   2.29463517
  0.22640000   2.29467372
  0.22660000   2.29588068
  0.22660000   2.29428249
  0.22660000   2.29562388
  0.22660000   2.29448784
  0.22660000   2.29544039
  0.22660000   2.29463281
  0.22660000   2.29530913
  0.22660000   2.29473497
  0.22660000   2.29521508
  0.22660000   2.29480680
  0.22660000   2.29514754
  0.22660000   2.29485715
  0.22660000   2.29509890
  0.22660000   2.29489231
  0.22660000   2.29506376
  0.22660000   2.29491672
  0.22660000   2.29503825
  0.22660000   2.29493354
  0.22660000   2.29501963
  0.22660000   2.29494501
  0.22660000   2.29500594
  0.22660000   2.29495271
  0.22660000   2.29499579
  0.22680000   2.29620311
  0.22680000   2.29459488
  0.22680000   2.29595071
  0.22680000   2.29479743
  0.22680000   2.29576880
  0.22680000   2.29494171
  0.22680000   2.29563755
  0.22680000   2.29504433
  0.22680000   2.29554271
  0.22680000   2.29511717
  0.22680000   2.29547403
  0.22680000   2.29516871
  0.22680000   2.29542419
  0.22680000   2.29520506
  0.22680000   2.29538788
  0.22680000   2.29523057
  0.22680000   2.29536134
  0.22680000   2.29524835
  0.22680000   2.29534183
  0.22680000   2.29526062
  0.22680000   2.29532740
  0.22680000   2.29526899
  0.22680000   2.29531665
  0.22700000   2.29651508
  0.22700000   2.29491389
  0.22700000   2.29626970
  0.22700000   2.29511135
  0.22700000   2.29609131
  0.22700000   2.29525329
  0.22700000   2.29596149
  0.22700000   2.29535515
  0.22700000   2.29586688
  0.22700000   2.29542812
  0.22700000   2.29579781
  0.22700000   2.29548025
  0.22700000   2.29574726
  0.22700000   2.29551737
  0.22700000   2.29571015
  0.22700000   2.29554367
  0.22700000   2.29568282
  0.22700000   2.29556221
  0.22700000   2.29566258
  0.22700000   2.29557516
  0.22700000   2.29564752
  0.22700000   2.29558411
  0.22700000   2.29563623
  0.22720000   2.29681485
  0.22720000   2.29524113
  0.22720000   2.29657939
  0.22720000   2.29543096
  0.22720000   2.29640674
  0.22720000   2.29556861
  0.22720000   2.29628001
  0.22720000   2.29566829
  0.22720000   2.29618686
  0.22720000   2.29574034
  0.22720000   2.29611827
  0.22720000   2.29579229
  0.22720000   2.29606766
  0.22720000   2.29582962
  0.22720000   2.29603022
  0.22720000   2.29585635
  0.22720000   2.29600241
  0.22720000   2.29587537
  0.22720000   2.29598168
  0.22720000   2.29588881
  0.22720000   2.29596614
  0.22720000   2.29589821
  0.22720000   2.29595442
  0.22740000   2.29710045
  0.22740000   2.29557843
  0.22740000   2.29687813
  0.22740000   2.29575776
  0.22740000   2.29671371
  0.22740000   2.29588895
  0.22740000   2.29659197
  0.22740000   2.29598478
  0.22740000   2.29650172
  0.22740000   2.29605465
  0.22740000   2.29643471
  0.22740000   2.29610549
  0.22740000   2.29638484
  0.22740000   2.29614235
  0.22740000   2.29634764
  0.22740000   2.29616899
  0.22740000   2.29631980
  0.22740000   2.29618814
  0.22740000   2.29629887
  0.22740000   2.29620181
  0.22740000   2.29628308
  0.22740000   2.29621147
  0.22740000   2.29627108
  0.22760000   2.29736966
  0.22760000   2.29592785
  0.22760000   2.29716404
  0.22760000   2.29609351
  0.22760000   2.29701064
  0.22760000   2.29621574
  0.22760000   2.29689608
  0.22760000   2.29630580
  0.22760000   2.29681041
  0.22760000   2.29637203
  0.22760000   2.29674625
  0.22760000   2.29642064
  0.22760000   2.29669809
  0.22760000   2.29645619
  0.22760000   2.29666186
  0.22760000   2.29648212
  0.22760000   2.29663452
  0.22760000   2.29650092
  0.22760000   2.29661381
  0.22760000   2.29651447
  0.22760000   2.29659806
  0.22760000   2.29652415
  0.22760000   2.29658600
  0.22780000   2.29762005
  0.22780000   2.29629169
  0.22780000   2.29743499
  0.22780000   2.29644019
  0.22780000   2.29729572
  0.22780000   2.29655068
  0.22780000   2.29719080
  0.22780000   2.29663277
  0.22780000   2.29711165
  0.22780000   2.29669365
  0.22780000   2.29705184
  0.22780000   2.29673869
  0.22780000   2.29700657
  0.22780000   2.29677192
  0.22780000   2.29697220
  0.22780000   2.29679635
  0.22780000   2.29694605
  0.22780000   2.29681421
  0.22780000   2.29692606
  0.22780000   2.29682719
  0.22780000   2.29691073
  0.22780000   2.29683655
  0.22780000   2.29689891
  0.22800000   2.29784887
  0.22800000   2.29667253
  0.22800000   2.29768858
  0.22800000   2.29680005
  0.22800000   2.29756687
  0.22800000   2.29689571
  0.22800000   2.29747436
  0.22800000   2.29696734
  0.22800000   2.29740395
  0.22800000   2.29702089
  0.22800000   2.29735026
  0.22800000   2.29706081
  0.22800000   2.29730924
  0.22800000   2.29709049
  0.22800000   2.29727781
  0.22800000   2.29711246
  0.22800000   2.29725368
  0.22800000   2.29712865
  0.22800000   2.29723507
  0.22800000   2.29714050
  0.22800000   2.29722066
  0.22800000   2.29714910
  0.22800000   2.29720945
  0.22820000   2.29805313
  0.22820000   2.29707321
  0.22820000   2.29792212
  0.22820000   2.29717562
  0.22820000   2.29782174
  0.22820000   2.29725302
  0.22820000   2.29774473
  0.22820000   2.29731141
  0.22820000   2.29768556
  0.22820000   2.29735537
  0.22820000   2.29764000
  0.22820000   2.29738836
  0.22820000   2.29760485
  0.22820000   2.29741303
  0.22820000   2.29757767
  0.22820000   2.29743141
  0.22820000   2.29755656
  0.22820000   2.29744503
  0.22820000   2.29754013
  0.22820000   2.29745503
  0.22820000   2.29752727
  0.22820000   2.29746232
  0.22820000   2.29751716
  0.22840000   2.29822950
  0.22840000   2.29749689
  0.22840000   2.29813261
  0.22840000   2.29756973
  0.22840000   2.29805765
  0.22840000   2.29762513
  0.22840000   2.29799956
  0.22840000   2.29766718
  0.22840000   2.29795445
  0.22840000   2.29769898
  0.22840000   2.29791934
  0.22840000   2.29772295
  0.22840000   2.29789194
  0.22840000   2.29774094
  0.22840000   2.29787050
  0.22840000   2.29775436
  0.22840000   2.29785366
  0.22840000   2.29776430
  0.22840000   2.29784038
  0.22840000   2.29777160
  0.22840000   2.29782984
  0.22840000   2.29777688
  0.22840000   2.29782145
  0.22860000   2.29837434
  0.22860000   2.29794703
  0.22860000   2.29831672
  0.22860000   2.29798555
  0.22860000   2.29827160
  0.22860000   2.29801489
  0.22860000   2.29823617
  0.22860000   2.29803715
  0.22860000   2.29820827
  0.22860000   2.29805393
  0.22860000   2.29818622
  0.22860000   2.29806651
  0.22860000   2.29816874
  0.22860000   2.29807585
  0.22860000   2.29815482
  0.22860000   2.29808271
  0.22860000   2.29814369
  0.22860000   2.29808767
  0.22860000   2.29813473
  0.22860000   2.29809120
  0.22860000   2.29812747
  0.22860000   2.29809362
  0.22860000   2.29812157
  0.22880000   2.29848368
  0.22880000   2.29842743
  0.22880000   2.29847075
  0.22880000   2.29842660
  0.22880000   2.29846020
  0.22880000   2.29842550
  0.22880000   2.29845152
  0.22880000   2.29842420
  0.22880000   2.29844431
  0.22880000   2.29842277
  0.22880000   2.29843827
  0.22880000   2.29842126
  0.22880000   2.29843317
  0.22880000   2.29841970
  0.22880000   2.29842883
  0.22880000   2.29841813
  0.22880000   2.29842509
  0.22880000   2.29841658
  0.22880000   2.29842186
  0.22880000   2.29841506
  0.22880000   2.29841903
  0.22880000   2.29841359
  0.22880000   2.29841655
  0.22900000   2.29855320
  0.22900000   2.29894223
  0.22900000   2.29859062
  0.22900000   2.29889676
  0.22900000   2.29861968
  0.22900000   2.29886054
  0.22900000   2.29864216
  0.22900000   2.29883161
  0.22900000   2.29865946
  0.22900000   2.29880844
  0.22900000   2.29867271
  0.22900000   2.29878982
  0.22900000   2.29868277
  0.22900000   2.29877481
  0.22900000   2.29869036
  0.22900000   2.29876266
  0.22900000   2.29869601
  0.22900000   2.29875278
  0.22900000   2.29870016
  0.22900000   2.29874471
  0.22900000   2.29870314
  0.22900000   2.29873808
  0.22900000   2.29870522
  0.22920000   2.29857822
  0.22920000   2.29949591
  0.22920000   2.29867186
  0.22920000   2.29940031
  0.22920000   2.29874585
  0.22920000   2.29932401
  0.22920000   2.29880422
  0.22920000   2.29926306
  0.22920000   2.29885019
  0.22920000   2.29921429
  0.22920000   2.29888633
  0.22920000   2.29917522
  0.22920000   2.29891469
  0.22920000   2.29914388
  0.22920000   2.29893688
  0.22920000   2.29911867
  0.22920000   2.29895420
  0.22920000   2.29909837
  0.22920000   2.29896766
  0.22920000   2.29908198
  0.22920000   2.29897808
  0.22920000   2.29906870
  0.22920000   2.29898610
  0.22940000   2.29855370
  0.22940000   2.30009329
  0.22940000   2.29870960
  0.22940000   2.29994192
  0.22940000   2.29883406
  0.22940000   2.29982036
  0.22940000   2.29893334
  0.22940000   2.29972269
  0.22940000   2.29901247
  0.22940000   2.29964415
  0.22940000   2.29907547
  0.22940000   2.29958095
  0.22940000   2.29912559
  0.22940000   2.29953005
  0.22940000   2.29916541
  0.22940000   2.29948900
  0.22940000   2.29919699
  0.22940000   2.29945587
  0.22940000   2.29922201
  0.22940000   2.29942909
  0.22940000   2.29924178
  0.22940000   2.29940740
  0.22940000   2.29925736
  0.22960000   2.29847424
  0.22960000   2.30073953
  0.22960000   2.29869852
  0.22960000   2.30052667
  0.22960000   2.29887920
  0.22960000   2.30035448
  0.22960000   2.29902467
  0.22960000   2.30021516
  0.22960000   2.29914175
  0.22960000   2.30010237
  0.22960000   2.29923592
  0.22960000   2.30001102
  0.22960000   2.29931162
  0.22960000   2.29993700
  0.22960000   2.29937243
  0.22960000   2.29987698
  0.22960000   2.29942123
  0.22960000   2.29982828
  0.22960000   2.29946037
  0.22960000   2.29978873
  0.22960000   2.29949171
  0.22960000   2.29975657
  0.22960000   2.29951677
  0.22980000   2.29833411
  0.22980000   2.30144013
  0.22980000   2.29863290
  0.22980000   2.30116004
  0.22980000   2.29887566
  0.22980000   2.30093173
  0.22980000   2.29907283
  0.22980000   2.30074559
  0.22980000   2.29923294
  0.22980000   2.30059380
  0.22980000   2.29936290
  0.22980000   2.30046999
  0.22980000   2.29946835
  0.22980000   2.30036895
  0.22980000   2.29955387
  0.22980000   2.30028648
  0.22980000   2.29962320
  0.22980000   2.30021912
  0.22980000   2.29967936
  0.22980000   2.30016408
  0.22980000   2.29972484
  0.22980000   2.30011908
  0.22980000   2.29976162
  0.23000000   2.29812720
  0.23000000   2.30220086
  0.23000000   2.29850658
  0.23000000   2.30184790
  0.23000000   2.29881735
  0.23000000   2.30155794
  0.23000000   2.29907188
  0.23000000   2.30131970
  0.23000000   2.29928032
  0.23000000   2.30112393
  0.23000000   2.29945098
  0.23000000   2.30096303
  0.23000000   2.29959068
  0.23000000   2.30083077
  0.23000000   2.29970500
  0.23000000   2.30072202
  0.23000000   2.29979852
  0.23000000   2.30063257
  0.23000000   2.29987501
  0.23000000   2.30055898
  0.23000000   2.29993752
  0.23000000   2.30049840
  0.23000000   2.29998859
  0.23020000   2.29784714
  0.23020000   2.30302776
  0.23020000   2.29831299
  0.23020000   2.30259652
  0.23020000   2.29869766
  0.23020000   2.30223943
  0.23020000   2.29901530
  0.23020000   2.30194371
  0.23020000   2.29927757
  0.23020000   2.30169882
  0.23020000   2.29949410
  0.23020000   2.30149599
  0.23020000   2.29967285
  0.23020000   2.30132798
  0.23020000   2.29982039
  0.23020000   2.30118880
  0.23020000   2.29994213
  0.23020000   2.30107347
  0.23020000   2.30004258
  0.23020000   2.30097790
  0.23020000   2.30012543
  0.23020000   2.30089867
  0.23020000   2.30019373
  0.23040000   2.29748725
  0.23040000   2.30392712
  0.23040000   2.29804517
  0.23040000   2.30341248
  0.23040000   2.29850950
  0.23040000   2.30298294
  0.23040000   2.29889598
  0.23040000   2.30262442
  0.23040000   2.29921767
  0.23040000   2.30232516
  0.23040000   2.29948544
  0.23040000   2.30207538
  0.23040000   2.29970830
  0.23040000   2.30186687
  0.23040000   2.29989379
  0.23040000   2.30169280
  0.23040000   2.30004814
  0.23040000   2.30154748
  0.23040000   2.30017657
  0.23040000   2.30142613
  0.23040000   2.30028342
  0.23040000   2.30132479
  0.23040000   2.30037228
  0.23060000   2.29704063
  0.23060000   2.30490533
  0.23060000   2.29769579
  0.23060000   2.30430267
  0.23060000   2.29824529
  0.23060000   2.30379567
  0.23060000   2.29870624
  0.23060000   2.30336914
  0.23060000   2.29909296
  0.23060000   2.30301031
  0.23060000   2.29941743
  0.23060000   2.30270844
  0.23060000   2.29968968
  0.23060000   2.30245449
  0.23060000   2.29991811
  0.23060000   2.30224083
  0.23060000   2.30010977
  0.23060000   2.30206108
  0.23060000   2.30027057
  0.23060000   2.30190983
  0.23060000   2.30040545
  0.23060000   2.30178256
  0.23060000   2.30051859
  0.23080000   2.29650022
  0.23080000   2.30596888
  0.23080000   2.29725725
  0.23080000   2.30527420
  0.23080000   2.29789700
  0.23080000   2.30468517
  0.23080000   2.29843782
  0.23080000   2.30418572
  0.23080000   2.29889507
  0.23080000   2.30376223
  0.23080000   2.29928175
  0.23080000   2.30340316
  0.23080000   2.29960877
  0.23080000   2.30309871
  0.23080000   2.29988535
  0.23080000   2.30284058
  0.23080000   2.30011928
  0.23080000   2.30262171
  0.23080000   2.30031713
  0.23080000   2.30243614
  0.23080000   2.30048446
  0.23080000   2.30227878
  0.23080000   2.30062598
  0.23100000   2.29585887
  0.23100000   2.30712424
  0.23100000   2.29672166
  0.23100000   2.30633431
  0.23100000   2.29745624
  0.23100000   2.30565929
  0.23100000   2.29808191
  0.23100000   2.30508243
  0.23100000   2.29861498
  0.23100000   2.30458948
  0.23100000   2.29906926
  0.23100000   2.30416823
  0.23100000   2.29945645
  0.23100000   2.30380827
  0.23100000   2.29978650
  0.23100000   2.30350067
  0.23100000   2.30006787
  0.23100000   2.30323783
  0.23100000   2.30030774
  0.23100000   2.30301324
  0.23100000   2.30051225
  0.23100000   2.30282132
  0.23100000   2.30068659
  0.23120000   2.29510943
  0.23120000   2.30837774
  0.23120000   2.29608101
  0.23120000   2.30749029
  0.23120000   2.29691426
  0.23120000   2.30672609
  0.23120000   2.29762926
  0.23120000   2.30606796
  0.23120000   2.29824303
  0.23120000   2.30550118
  0.23120000   2.29877005
  0.23120000   2.30501306
  0.23120000   2.29922271
  0.23120000   2.30459270
  0.23120000   2.29961155
  0.23120000   2.30423069
  0.23120000   2.29994563
  0.23120000   2.30391895
  0.23120000   2.30023268
  0.23120000   2.30365049
  0.23120000   2.30047934
  0.23120000   2.30341931
  0.23120000   2.30069129
  0.23140000   2.29424484
  0.23140000   2.30973544
  0.23140000   2.29532721
  0.23140000   2.30874932
  0.23140000   2.29626212
  0.23140000   2.30789371
  0.23140000   2.29707019
  0.23140000   2.30715124
  0.23140000   2.29776897
  0.23140000   2.30650689
  0.23140000   2.29837349
  0.23140000   2.30594768
  0.23140000   2.29889663
  0.23140000   2.30546236
  0.23140000   2.29934945
  0.23140000   2.30504117
  0.23140000   2.29974149
  0.23140000   2.30467564
  0.23140000   2.30008095
  0.23140000   2.30435842
  0.23140000   2.30037491
  0.23140000   2.30408314
  0.23140000   2.30062950
  0.23160000   2.29325830
  0.23160000   2.31120300
  0.23160000   2.29445228
  0.23160000   2.31011834
  0.23160000   2.29549076
  0.23160000   2.30917024
  0.23160000   2.29639472
  0.23160000   2.30834132
  0.23160000   2.29718209
  0.23160000   2.30761650
  0.23160000   2.29786824
  0.23160000   2.30698265
  0.23160000   2.29846644
  0.23160000   2.30642833
  0.23160000   2.29898813
  0.23160000   2.30594355
  0.23160000   2.29944319
  0.23160000   2.30551959
  0.23160000   2.29984023
  0.23160000   2.30514882
  0.23160000   2.30018670
  0.23160000   2.30482457
  0.23160000   2.30048907
  0.23180000   2.29214336
  0.23180000   2.31278554
  0.23180000   2.29344841
  0.23180000   2.31160385
  0.23180000   2.29459115
  0.23180000   2.31056350
  0.23180000   2.29559275
  0.23180000   2.30964724
  0.23180000   2.29647131
  0.23180000   2.30884009
  0.23180000   2.29724244
  0.23180000   2.30812894
  0.23180000   2.29791961
  0.23180000   2.30750230
  0.23180000   2.29851452
  0.23180000   2.30695010
  0.23180000   2.29903732
  0.23180000   2.30646349
  0.23180000   2.29949688
  0.23180000   2.30603467
  0.23180000   2.29990093
  0.23180000   2.30565677
  0.23180000   2.30025624
  0.23200000   2.29089407
  0.23200000   2.31448743
  0.23200000   2.29230821
  0.23200000   2.31321179
  0.23200000   2.29355451
  0.23200000   2.31208087
  0.23200000   2.29465419
  0.23200000   2.31107775
  0.23200000   2.29562539
  0.23200000   2.31018767
  0.23200000   2.29648379
  0.23200000   2.30939767
  0.23200000   2.29724296
  0.23200000   2.30869638
  0.23200000   2.29791471
  0.23200000   2.30807377
  0.23200000   2.29850935
  0.23200000   2.30752096
  0.23200000   2.29903591
  0.23200000   2.30703011
  0.23200000   2.29950231
  0.23200000   2.30659426
  0.23200000   2.29991551
  0.23220000   2.28950515
  0.23220000   2.31631216
  0.23220000   2.29102482
  0.23220000   2.31494725
  0.23220000   2.29237245
  0.23220000   2.31372907
  0.23220000   2.29356917
  0.23220000   2.31264112
  0.23220000   2.29463309
  0.23220000   2.31166896
  0.23220000   2.29557980
  0.23220000   2.31079993
  0.23220000   2.29642287
  0.23220000   2.31002289
  0.23220000   2.29717409
  0.23220000   2.30932794
  0.23220000   2.29784382
  0.23220000   2.30870633
  0.23220000   2.29844115
  0.23220000   2.30815026
  0.23220000   2.29897409
  0.23220000   2.30765280
  0.23220000   2.29944972
  0.23240000   2.28797216
  0.23240000   2.31826218
  0.23240000   2.28959216
  0.23240000   2.31681433
  0.23240000   2.29103722
  0.23240000   2.31551389
  0.23240000   2.29232834
  0.23240000   2.31434481
  0.23240000   2.29348345
  0.23240000   2.31329308
  0.23240000   2.29451803
  0.23240000   2.31234642
  0.23240000   2.29544549
  0.23240000   2.31149398
  0.23240000   2.29627756
  0.23240000   2.31072615
  0.23240000   2.29702450
  0.23240000   2.31003437
  0.23240000   2.29769538
  0.23240000   2.30941099
  0.23240000   2.29829821
  0.23240000   2.30884919
  0.23240000   2.29884007
  0.23260000   2.28629161
  0.23260000   2.32033873
  0.23260000   2.28800506
  0.23260000   2.31881592
  0.23260000   2.28954194
  0.23260000   2.31743994
  0.23260000   2.29092304
[truncated: 204,569 more chars]
