# Supplementary material for: Bifurcations of a New Fractional-Order System with a One-Scroll Chaotic Attractor
Source: Hindawi journal article supplement (doi:10.1155/2019/8341514), 2019-01-01
Supplement: f1 [file 8341514.f1.zip › 8341514.f1/a-bifurcationdata/adataq097.dat]

  0.10000000   0.45399801
  0.10000000   0.43923933
  0.10000000   0.42497253
  0.10000000   0.41118000
  0.10000000   0.39784490
  0.10000000   0.38495107
  0.10000000   0.37248305
  0.10000000   0.36042600
  0.10000000   0.34876566
  0.10000000   0.33748837
  0.10000000   0.32658096
  0.10000000   0.31603081
  0.10000000   0.30582574
  0.10000000   0.29595407
  0.10000000   0.28640453
  0.10000000   0.27716627
  0.10000000   0.26822885
  0.10000000   0.25958220
  0.10000000   0.25121661
  0.10000000   0.24312272
  0.10000000   0.23529152
  0.10000000   0.22771429
  0.10000000   0.22038264
  0.10000000   0.21328845
  0.10020000   0.46098805
  0.10020000   0.44628406
  0.10020000   0.43206160
  0.10020000   0.41830365
  0.10020000   0.40499395
  0.10020000   0.39211689
  0.10020000   0.37965753
  0.10020000   0.36760152
  0.10020000   0.35593507
  0.10020000   0.34464496
  0.10020000   0.33371847
  0.10020000   0.32314336
  0.10020000   0.31290785
  0.10020000   0.30300062
  0.10020000   0.29341075
  0.10020000   0.28412773
  0.10020000   0.27514142
  0.10020000   0.26644207
  0.10020000   0.25802025
  0.10020000   0.24986687
  0.10020000   0.24197317
  0.10020000   0.23433070
  0.10020000   0.22693127
  0.10020000   0.21976702
  0.10040000   0.46808194
  0.10040000   0.45343789
  0.10040000   0.43926492
  0.10040000   0.42554662
  0.10040000   0.41226729
  0.10040000   0.39941186
  0.10040000   0.38696590
  0.10040000   0.37491554
  0.10040000   0.36324747
  0.10040000   0.35194889
  0.10040000   0.34100752
  0.10040000   0.33041152
  0.10040000   0.32014949
  0.10040000   0.31021046
  0.10040000   0.30058389
  0.10040000   0.29125957
  0.10040000   0.28222770
  0.10040000   0.27347881
  0.10040000   0.26500376
  0.10040000   0.25679375
  0.10040000   0.24884026
  0.10040000   0.24113508
  0.10040000   0.23367028
  0.10040000   0.22643819
  0.10060000   0.47528106
  0.10060000   0.46070232
  0.10060000   0.44658416
  0.10060000   0.43291073
  0.10060000   0.41966689
  0.10060000   0.40683810
  0.10060000   0.39441043
  0.10060000   0.38237050
  0.10060000   0.37070546
  0.10060000   0.35940294
  0.10060000   0.34845108
  0.10060000   0.33783842
  0.10060000   0.32755397
  0.10060000   0.31758712
  0.10060000   0.30792764
  0.10060000   0.29856569
  0.10060000   0.28949176
  0.10060000   0.28069668
  0.10060000   0.27217161
  0.10060000   0.26390800
  0.10060000   0.25589761
  0.10060000   0.24813246
  0.10060000   0.24060487
  0.10060000   0.23330739
  0.10080000   0.48258677
  0.10080000   0.46807888
  0.10080000   0.45402097
  0.10080000   0.44039778
  0.10080000   0.42719470
  0.10080000   0.41439773
  0.10080000   0.40199342
  0.10080000   0.38996887
  0.10080000   0.37831168
  0.10080000   0.36700992
  0.10080000   0.35605213
  0.10080000   0.34542726
  0.10080000   0.33512468
  0.10080000   0.32513415
  0.10080000   0.31544577
  0.10080000   0.30605004
  0.10080000   0.29693775
  0.10080000   0.28810003
  0.10080000   0.27952833
  0.10080000   0.27121438
  0.10080000   0.26315017
  0.10080000   0.25532800
  0.10080000   0.24774040
  0.10080000   0.24038015
  0.10100000   0.49000048
  0.10100000   0.47556910
  0.10100000   0.46157704
  0.10100000   0.44800960
  0.10100000   0.43485272
  0.10100000   0.42209290
  0.10100000   0.40971719
  0.10100000   0.39771314
  0.10100000   0.38606881
  0.10100000   0.37477269
  0.10100000   0.36381373
  0.10100000   0.35318127
  0.10100000   0.34286504
  0.10100000   0.33285516
  0.10100000   0.32314209
  0.10100000   0.31371663
  0.10100000   0.30456988
  0.10100000   0.29569329
  0.10100000   0.28707857
  0.10100000   0.27871771
  0.10100000   0.27060300
  0.10100000   0.26272694
  0.10100000   0.25508232
  0.10100000   0.24766215
  0.10120000   0.49752359
  0.10120000   0.48317452
  0.10120000   0.46925406
  0.10120000   0.45574805
  0.10120000   0.44264296
  0.10120000   0.42992579
  0.10120000   0.41758407
  0.10120000   0.40560583
  0.10120000   0.39397954
  0.10120000   0.38269414
  0.10120000   0.37173895
  0.10120000   0.36110371
  0.10120000   0.35077852
  0.10120000   0.34075385
  0.10120000   0.33102048
  0.10120000   0.32156954
  0.10120000   0.31239246
  0.10120000   0.30348096
  0.10120000   0.29482703
  0.10120000   0.28642294
  0.10120000   0.27826123
  0.10120000   0.27033465
  0.10120000   0.26263623
  0.10120000   0.25515919
  0.10140000   0.50515750
  0.10140000   0.49089670
  0.10140000   0.47705372
  0.10140000   0.46361498
  0.10140000   0.45056743
  0.10140000   0.43789859
  0.10140000   0.42559645
  0.10140000   0.41364949
  0.10140000   0.40204662
  0.10140000   0.39077719
  0.10140000   0.37983091
  0.10140000   0.36919791
  0.10140000   0.35886864
  0.10140000   0.34883393
  0.10140000   0.33908488
  0.10140000   0.32961295
  0.10140000   0.32040986
  0.10140000   0.31146763
  0.10140000   0.30277853
  0.10140000   0.29433510
  0.10140000   0.28613012
  0.10140000   0.27815662
  0.10140000   0.27040782
  0.10140000   0.26287719
  0.10160000   0.51290364
  0.10160000   0.49873719
  0.10160000   0.48497775
  0.10160000   0.47161226
  0.10160000   0.45862818
  0.10160000   0.44601351
  0.10160000   0.43375671
  0.10160000   0.42184670
  0.10160000   0.41027281
  0.10160000   0.39902480
  0.10160000   0.38809278
  0.10160000   0.37746723
  0.10160000   0.36713898
  0.10160000   0.35709918
  0.10160000   0.34733929
  0.10160000   0.33785106
  0.10160000   0.32862651
  0.10160000   0.31965796
  0.10160000   0.31093796
  0.10160000   0.30245931
  0.10160000   0.29421504
  0.10160000   0.28619842
  0.10160000   0.27840292
  0.10160000   0.27082222
  0.10180000   0.52076342
  0.10180000   0.50669757
  0.10180000   0.49302787
  0.10180000   0.47974178
  0.10180000   0.46682726
  0.10180000   0.45427278
  0.10180000   0.44206726
  0.10180000   0.43020005
  0.10180000   0.41866090
  0.10180000   0.40743996
  0.10180000   0.39652774
  0.10180000   0.38591507
  0.10180000   0.37559315
  0.10180000   0.36555346
  0.10180000   0.35578777
  0.10180000   0.34628815
  0.10180000   0.33704694
  0.10180000   0.32805671
  0.10180000   0.31931031
  0.10180000   0.31080078
  0.10180000   0.30252143
  0.10180000   0.29446576
  0.10180000   0.28662746
  0.10180000   0.27900046
  0.10200000   0.52873827
  0.10200000   0.51477942
  0.10200000   0.50120582
  0.10200000   0.48800544
  0.10200000   0.47516675
  0.10200000   0.46267866
  0.10200000   0.45053054
  0.10200000   0.43871216
  0.10200000   0.42721371
  0.10200000   0.41602570
  0.10200000   0.40513902
  0.10200000   0.39454489
  0.10200000   0.38423482
  0.10200000   0.37420063
  0.10200000   0.36443443
  0.10200000   0.35492859
  0.10200000   0.34567572
  0.10200000   0.33666870
  0.10200000   0.32790064
  0.10200000   0.31936485
  0.10200000   0.31105487
  0.10200000   0.30296445
  0.10200000   0.29508753
  0.10200000   0.28741823
  0.10220000   0.53682964
  0.10220000   0.52298432
  0.10220000   0.50951334
  0.10220000   0.49640516
  0.10220000   0.48364872
  0.10220000   0.47123339
  0.10220000   0.45914899
  0.10220000   0.44738569
  0.10220000   0.43593408
  0.10220000   0.42478507
  0.10220000   0.41392990
  0.10220000   0.40336016
  0.10220000   0.39306769
  0.10220000   0.38304465
  0.10220000   0.37328345
  0.10220000   0.36377677
  0.10220000   0.35451751
  0.10220000   0.34549883
  0.10220000   0.33671410
  0.10220000   0.32815689
  0.10220000   0.31982101
  0.10220000   0.31170042
  0.10220000   0.30378929
  0.10220000   0.29608198
  0.10240000   0.54503896
  0.10240000   0.53131387
  0.10240000   0.51795218
  0.10240000   0.50494285
  0.10240000   0.49227527
  0.10240000   0.47993927
  0.10240000   0.46792508
  0.10240000   0.45622330
  0.10240000   0.44482489
  0.10240000   0.43372114
  0.10240000   0.42290368
  0.10240000   0.41236440
  0.10240000   0.40209552
  0.10240000   0.39208950
  0.10240000   0.38233906
  0.10240000   0.37283717
  0.10240000   0.36357703
  0.10240000   0.35455207
  0.10240000   0.34575592
  0.10240000   0.33718242
  0.10240000   0.32882560
  0.10240000   0.32067968
  0.10240000   0.31273905
  0.10240000   0.30499827
  0.10260000   0.55336769
  0.10260000   0.53976966
  0.10260000   0.52652411
  0.10260000   0.51362045
  0.10260000   0.50104852
  0.10260000   0.48879859
  0.10260000   0.47686131
  0.10260000   0.46522767
  0.10260000   0.45388902
  0.10260000   0.44283704
  0.10260000   0.43206367
  0.10260000   0.42156118
  0.10260000   0.41132210
  0.10260000   0.40133920
  0.10260000   0.39160552
  0.10260000   0.38211431
  0.10260000   0.37285906
  0.10260000   0.36383347
  0.10260000   0.35503142
  0.10260000   0.34644701
  0.10260000   0.33807451
  0.10260000   0.32990837
  0.10260000   0.32194321
  0.10260000   0.31417381
  0.10280000   0.56181726
  0.10280000   0.54835331
  0.10280000   0.53523089
  0.10280000   0.52243988
  0.10280000   0.50997057
  0.10280000   0.49781365
  0.10280000   0.48596017
  0.10280000   0.47440151
  0.10280000   0.46312941
  0.10280000   0.45213588
  0.10280000   0.44141325
  0.10280000   0.43095409
  0.10280000   0.42075126
  0.10280000   0.41079784
  0.10280000   0.40108717
  0.10280000   0.39161279
  0.10280000   0.38236846
  0.10280000   0.37334814
  0.10280000   0.36454598
  0.10280000   0.35595633
  0.10280000   0.34757368
  0.10280000   0.33939273
  0.10280000   0.33140830
  0.10280000   0.32361541
  0.10300000   0.57038914
  0.10300000   0.55706642
  0.10300000   0.54407430
  0.10300000   0.53140311
  0.10300000   0.51904356
  0.10300000   0.50698677
  0.10300000   0.49522417
  0.10300000   0.48374754
  0.10300000   0.47254897
  0.10300000   0.46162084
  0.10300000   0.45095579
  0.10300000   0.44054674
  0.10300000   0.43038686
  0.10300000   0.42046953
  0.10300000   0.41078838
  0.10300000   0.40133723
  0.10300000   0.39211012
  0.10300000   0.38310127
  0.10300000   0.37430507
  0.10300000   0.36571612
  0.10300000   0.35732915
  0.10300000   0.34913908
  0.10300000   0.34114096
  0.10300000   0.33333000
  0.10320000   0.57908477
  0.10320000   0.56591060
  0.10320000   0.55305611
  0.10320000   0.54051207
  0.10320000   0.52826962
  0.10320000   0.51632027
  0.10320000   0.50465585
  0.10320000   0.49326850
  0.10320000   0.48215067
  0.10320000   0.47129507
  0.10320000   0.46069470
  0.10320000   0.45034279
  0.10320000   0.44023280
  0.10320000   0.43035843
  0.10320000   0.42071357
  0.10320000   0.41129233
  0.10320000   0.40208902
  0.10320000   0.39309809
  0.10320000   0.38431422
  0.10320000   0.37573221
  0.10320000   0.36734705
  0.10320000   0.35915386
  0.10320000   0.35114792
  0.10320000   0.34332463
  0.10340000   0.58790561
  0.10340000   0.57488745
  0.10340000   0.56217809
  0.10340000   0.54976872
  0.10340000   0.53765089
  0.10340000   0.52581649
  0.10340000   0.51425773
  0.10340000   0.50296712
  0.10340000   0.49193746
  0.10340000   0.48116179
  0.10340000   0.47063343
  0.10340000   0.46034591
  0.10340000   0.45029302
  0.10340000   0.44046871
  0.10340000   0.43086719
  0.10340000   0.42148282
  0.10340000   0.41231015
  0.10340000   0.40334392
  0.10340000   0.39457902
  0.10340000   0.38601051
  0.10340000   0.37763358
  0.10340000   0.36944358
  0.10340000   0.36143601
  0.10340000   0.35360648
  0.10360000   0.59685312
  0.10360000   0.58399860
  0.10360000   0.57144203
  0.10360000   0.55917502
  0.10360000   0.54718950
  0.10360000   0.53547776
  0.10360000   0.52403236
  0.10360000   0.51284617
  0.10360000   0.50191232
  0.10360000   0.49122420
  0.10360000   0.48077541
  0.10360000   0.47055981
  0.10360000   0.46057146
  0.10360000   0.45080462
  0.10360000   0.44125374
  0.10360000   0.43191346
  0.10360000   0.42277859
  0.10360000   0.41384411
  0.10360000   0.40510514
  0.10360000   0.39655697
  0.10360000   0.38819502
  0.10360000   0.38001486
  0.10360000   0.37201218
  0.10360000   0.36418279
  0.10380000   0.60592874
  0.10380000   0.59324566
  0.10380000   0.58084971
  0.10380000   0.56873292
  0.10380000   0.55688761
  0.10380000   0.54530642
  0.10380000   0.53398229
  0.10380000   0.52290841
  0.10380000   0.51207825
  0.10380000   0.50148551
  0.10380000   0.49112411
  0.10380000   0.48098819
  0.10380000   0.47107210
  0.10380000   0.46137038
  0.10380000   0.45187774
  0.10380000   0.44258907
  0.10380000   0.43349944
  0.10380000   0.42460406
  0.10380000   0.41589829
  0.10380000   0.40737763
  0.10380000   0.39903774
  0.10380000   0.39087437
  0.10380000   0.38288343
  0.10380000   0.37506094
  0.10400000   0.61513393
  0.10400000   0.60263022
  0.10400000   0.59040291
  0.10400000   0.57844438
  0.10400000   0.56674735
  0.10400000   0.55530482
  0.10400000   0.54411005
  0.10400000   0.53315660
  0.10400000   0.52243824
  0.10400000   0.51194896
  0.10400000   0.50168301
  0.10400000   0.49163479
  0.10400000   0.48179895
  0.10400000   0.47217027
  0.10400000   0.46274374
  0.10400000   0.45351450
  0.10400000   0.44447785
  0.10400000   0.43562923
  0.10400000   0.42696423
  0.10400000   0.41847858
  0.10400000   0.41016814
  0.10400000   0.40202888
  0.10400000   0.39405689
  0.10400000   0.38624838
  0.10420000   0.62447012
  0.10420000   0.61215390
  0.10420000   0.60010338
  0.10420000   0.58831135
  0.10420000   0.57677087
  0.10420000   0.56547528
  0.10420000   0.55441821
  0.10420000   0.54359351
  0.10420000   0.53299527
  0.10420000   0.52261779
  0.10420000   0.51245558
  0.10420000   0.50250335
  0.10420000   0.49275600
  0.10420000   0.48320858
  0.10420000   0.47385632
  0.10420000   0.46469460
  0.10420000   0.45571897
  0.10420000   0.44692509
  0.10420000   0.43830877
  0.10420000   0.42986596
  0.10420000   0.42159271
  0.10420000   0.41348520
  0.10420000   0.40553971
  0.10420000   0.39775265
  0.10440000   0.63393876
  0.10440000   0.62181828
  0.10440000   0.60995291
  0.10440000   0.59833577
  0.10440000   0.58696029
  0.10440000   0.57582016
  0.10440000   0.56490931
  0.10440000   0.55422191
  0.10440000   0.54375234
  0.10440000   0.53349522
  0.10440000   0.52344532
  0.10440000   0.51359762
  0.10440000   0.50394727
  0.10440000   0.49448959
  0.10440000   0.48522005
  0.10440000   0.47613427
  0.10440000   0.46722801
  0.10440000   0.45849717
  0.10440000   0.44993776
  0.10440000   0.44154594
  0.10440000   0.43331797
  0.10440000   0.42525021
  0.10440000   0.41733915
  0.10440000   0.40958137
  0.10460000   0.64354127
  0.10460000   0.63162496
  0.10460000   0.61995324
  0.10460000   0.60851958
  0.10460000   0.59731775
  0.10460000   0.58634176
  0.10460000   0.57558587
  0.10460000   0.56504454
  0.10460000   0.55471245
  0.10460000   0.54458448
  0.10460000   0.53465570
  0.10460000   0.52492133
  0.10460000   0.51537678
  0.10460000   0.50601762
  0.10460000   0.49683954
  0.10460000   0.48783840
  0.10460000   0.47901018
  0.10460000   0.47035099
  0.10460000   0.46185706
  0.10460000   0.45352474
  0.10460000   0.44535048
  0.10460000   0.43733084
  0.10460000   0.42946249
  0.10460000   0.42174219
  0.10480000   0.65327907
  0.10480000   0.64157552
  0.10480000   0.63010612
  0.10480000   0.61886470
  0.10480000   0.60784536
  0.10480000   0.59704241
  0.10480000   0.58645042
  0.10480000   0.57606415
  0.10480000   0.56587856
  0.10480000   0.55588880
  0.10480000   0.54609019
  0.10480000   0.53647823
  0.10480000   0.52704855
  0.10480000   0.51779696
  0.10480000   0.50871938
  0.10480000   0.49981190
  0.10480000   0.49107070
  0.10480000   0.48249211
  0.10480000   0.47407256
  0.10480000   0.46580858
  0.10480000   0.45769683
  0.10480000   0.44973405
  0.10480000   0.44191707
  0.10480000   0.43424284
  0.10500000   0.66315357
  0.10500000   0.65167152
  0.10500000   0.64041329
  0.10500000   0.62937305
  0.10500000   0.61854521
  0.10500000   0.60792440
  0.10500000   0.59750548
  0.10500000   0.58728348
  0.10500000   0.57725365
  0.10500000   0.56741138
  0.10500000   0.55775227
  0.10500000   0.54827203
  0.10500000   0.53896657
  0.10500000   0.52983189
  0.10500000   0.52086416
  0.10500000   0.51205966
  0.10500000   0.50341479
  0.10500000   0.49492607
  0.10500000   0.48659014
  0.10500000   0.47840371
  0.10500000   0.47036363
  0.10500000   0.46246680
  0.10500000   0.45471026
  0.10500000   0.44709108
  0.10520000   0.67316617
  0.10520000   0.66191451
  0.10520000   0.65087646
  0.10520000   0.64004651
  0.10520000   0.62941939
  0.10520000   0.61899002
  0.10520000   0.60875353
  0.10520000   0.59870523
  0.10520000   0.58884064
  0.10520000   0.57915541
  0.10520000   0.56964535
  0.10520000   0.56030645
  0.10520000   0.55113482
  0.10520000   0.54212669
  0.10520000   0.53327844
  0.10520000   0.52458655
  0.10520000   0.51604764
  0.10520000   0.50765841
  0.10520000   0.49941569
  0.10520000   0.49131637
  0.10520000   0.48335748
  0.10520000   0.47553610
  0.10520000   0.46784941
  0.10520000   0.46029468
  0.10540000   0.68331825
  0.10540000   0.67230602
  0.10540000   0.66149733
  0.10540000   0.65088697
  0.10540000   0.64046996
  0.10540000   0.63024151
  0.10540000   0.62019703
  0.10540000   0.61033209
  0.10540000   0.60064246
  0.10540000   0.59112403
  0.10540000   0.58177286
  0.10540000   0.57258516
  0.10540000   0.56355725
  0.10540000   0.55468559
  0.10540000   0.54596676
  0.10540000   0.53739744
  0.10540000   0.52897444
  0.10540000   0.52069465
  0.10540000   0.51255507
  0.10540000   0.50455278
  0.10540000   0.49668497
  0.10540000   0.48894890
  0.10540000   0.48134191
  0.10540000   0.47386141
  0.10560000   0.69361116
  0.10560000   0.68284757
  0.10560000   0.67227757
  0.10560000   0.66189627
  0.10560000   0.65169895
  0.10560000   0.64168111
  0.10560000   0.63183841
  0.10560000   0.62216671
  0.10560000   0.61266198
  0.10560000   0.60332037
  0.10560000   0.59413817
  0.10560000   0.58511180
  0.10560000   0.57623779
  0.10560000   0.56751281
  0.10560000   0.55893364
  0.10560000   0.55049715
  0.10560000   0.54220033
  0.10560000   0.53404025
  0.10560000   0.52601410
  0.10560000   0.51811912
  0.10560000   0.51035267
  0.10560000   0.50271216
  0.10560000   0.49519508
  0.10560000   0.48779902
  0.10580000   0.70404624
  0.10580000   0.69354065
  0.10580000   0.68321885
  0.10580000   0.67307622
  0.10580000   0.66310836
  0.10580000   0.65331101
  0.10580000   0.64368009
  0.10580000   0.63421169
  0.10580000   0.62490204
  0.10580000   0.61574751
  0.10580000   0.60674461
  0.10580000   0.59788995
  0.10580000   0.58918029
  0.10580000   0.58061249
  0.10580000   0.57218351
  0.10580000   0.56389042
  0.10580000   0.55573038
  0.10580000   0.54770065
  0.10580000   0.53979856
  0.10580000   0.53202153
  0.10580000   0.52436708
  0.10580000   0.51683276
  0.10580000   0.50941624
  0.10580000   0.50211522
  0.10600000   0.71462483
  0.10600000   0.70438672
  0.10600000   0.69432277
  0.10600000   0.68442863
  0.10600000   0.67470016
  0.10600000   0.66513336
  0.10600000   0.65572441
  0.10600000   0.64646962
  0.10600000   0.63736545
  0.10600000   0.62840848
  0.10600000   0.61959544
  0.10600000   0.61092316
  0.10600000   0.60238857
  0.10600000   0.59398872
  0.10600000   0.58572078
  0.10600000   0.57758197
  0.10600000   0.56956963
  0.10600000   0.56168119
  0.10600000   0.55391415
  0.10600000   0.54626607
  0.10600000   0.53873463
  0.10600000   0.53131753
  0.10600000   0.52401258
  0.10600000   0.51681763
  0.10620000   0.72534819
  0.10620000   0.71538722
  0.10620000   0.70559092
  0.10620000   0.69595524
  0.10620000   0.68647628
  0.10620000   0.67715029
  0.10620000   0.66797369
  0.10620000   0.65894300
  0.10620000   0.65005493
  0.10620000   0.64130625
  0.10620000   0.63269389
  0.10620000   0.62421488
  0.10620000   0.61586635
  0.10620000   0.60764553
  0.10620000   0.59954974
  0.10620000   0.59157640
  0.10620000   0.58372301
  0.10620000   0.57598715
  0.10620000   0.56836647
  0.10620000   0.56085871
  0.10620000   0.55346167
  0.10620000   0.54617320
  0.10620000   0.53899125
  0.10620000   0.53191379
  0.10640000   0.73621761
  0.10640000   0.72654355
  0.10640000   0.71702487
  0.10640000   0.70765777
  0.10640000   0.69843860
  0.10640000   0.68936386
  0.10640000   0.68043017
  0.10640000   0.67163430
  0.10640000   0.66297315
  0.10640000   0.65444371
  0.10640000   0.64604309
  0.10640000   0.63776851
  0.10640000   0.62961728
  0.10640000   0.62158682
  0.10640000   0.61367460
  0.10640000   0.60587822
  0.10640000   0.59819533
  0.10640000   0.59062367
  0.10640000   0.58316103
  0.10640000   0.57580529
  0.10640000   0.56855440
  0.10640000   0.56140636
  0.10640000   0.55435922
  0.10640000   0.54741111
  0.10660000   0.74723431
  0.10660000   0.73785708
  0.10660000   0.72862612
  0.10660000   0.71953788
  0.10660000   0.71058895
  0.10660000   0.70177606
  0.10660000   0.69309605
  0.10660000   0.68454591
  0.10660000   0.67612272
  0.10660000   0.66782368
  0.10660000   0.65964608
  0.10660000   0.65158734
  0.10660000   0.64364492
  0.10660000   0.63581642
  0.10660000   0.62809947
  0.10660000   0.62049183
  0.10660000   0.61299130
  0.10660000   0.60559577
  0.10660000   0.59830317
  0.10660000   0.59111152
  0.10660000   0.58401890
  0.10660000   0.57702344
  0.10660000   0.57012333
  0.10660000   0.56331681
  0.10680000   0.75839948
  0.10680000   0.74932913
  0.10680000   0.74039614
  0.10680000   0.73159719
  0.10680000   0.72292911
  0.10680000   0.71438884
  0.10680000   0.70597346
  0.10680000   0.69768013
  0.10680000   0.68950614
  0.10680000   0.68144888
  0.10680000   0.67350582
  0.10680000   0.66567454
  0.10680000   0.65795269
  0.10680000   0.65033801
  0.10680000   0.64282831
  0.10680000   0.63542148
  0.10680000   0.62811547
  0.10680000   0.62090831
  0.10680000   0.61379808
  0.10680000   0.60678292
  0.10680000   0.59986104
  0.10680000   0.59303070
  0.10680000   0.58629021
  0.10680000   0.57963792
  0.10700000   0.76971428
  0.10700000   0.76096098
  0.10700000   0.75233633
  0.10700000   0.74383725
  0.10700000   0.73546078
  0.10700000   0.72720408
  0.10700000   0.71906442
  0.10700000   0.71103918
  0.10700000   0.70312583
  0.10700000   0.69532193
  0.10700000   0.68762513
  0.10700000   0.68003318
  0.10700000   0.67254389
  0.10700000   0.66515515
  0.10700000   0.65786493
  0.10700000   0.65067125
  0.10700000   0.64357221
  0.10700000   0.63656597
  0.10700000   0.62965074
  0.10700000   0.62282481
  0.10700000   0.61608648
  0.10700000   0.60943415
  0.10700000   0.60286623
  0.10700000   0.59638119
  0.10720000   0.78117983
  0.10720000   0.77275387
  0.10720000   0.76444806
  0.10720000   0.75625955
  0.10720000   0.74818559
  0.10720000   0.74022356
  0.10720000   0.73237090
  0.10720000   0.72462520
  0.10720000   0.71698409
  0.10720000   0.70944533
  0.10720000   0.70200672
  0.10720000   0.69466618
  0.10720000   0.68742166
  0.10720000   0.68027121
  0.10720000   0.67321295
  0.10720000   0.66624502
  0.10720000   0.65936568
  0.10720000   0.65257319
  0.10720000   0.64586592
  0.10720000   0.63924224
  0.10720000   0.63270061
  0.10720000   0.62623951
  0.10720000   0.61985748
  0.10720000   0.61355310
  0.10740000   0.79279718
  0.10740000   0.78470897
  0.10740000   0.77673263
  0.10740000   0.76886552
  0.10740000   0.76110512
  0.10740000   0.75344897
  0.10740000   0.74589475
  0.10740000   0.73844019
  0.10740000   0.73108312
  0.10740000   0.72382144
  0.10740000   0.71665315
  0.10740000   0.70957628
  0.10740000   0.70258897
  0.10740000   0.69568939
  0.10740000   0.68887580
  0.10740000   0.68214648
  0.10740000   0.67549981
  0.10740000   0.66893419
  0.10740000   0.66244809
  0.10740000   0.65604001
  0.10740000   0.64970852
  0.10740000   0.64345221
  0.10740000   0.63726972
  0.10740000   0.63115975
  0.10760000   0.80456736
  0.10760000   0.79682740
  0.10760000   0.78919126
  0.10760000   0.78165651
  0.10760000   0.77422081
  0.10760000   0.76688193
  0.10760000   0.75963770
  0.10760000   0.75248604
  0.10760000   0.74542494
  0.10760000   0.73845248
  0.10760000   0.73156679
  0.10760000   0.72476607
  0.10760000   0.71804859
  0.10760000   0.71141266
  0.10760000   0.70485667
  0.10760000   0.69837904
  0.10760000   0.69197826
  0.10760000   0.68565287
  0.10760000   0.67940143
  0.10760000   0.67322257
  0.10760000   0.66711495
  0.10760000   0.66107728
  0.10760000   0.65510831
  0.10760000   0.64920680
  0.10780000   0.81649132
  0.10780000   0.80911021
  0.10780000   0.80182510
  0.10780000   0.79463376
  0.10780000   0.78753405
  0.10780000   0.78052392
  0.10780000   0.77360137
  0.10780000   0.76676450
  0.10780000   0.76001147
  0.10780000   0.75334049
  0.10780000   0.74674986
  0.10780000   0.74023792
  0.10780000   0.73380306
  0.10780000   0.72744375
  0.10780000   0.72115849
  0.10780000   0.71494584
  0.10780000   0.70880440
  0.10780000   0.70273280
  0.10780000   0.69672975
  0.10780000   0.69079397
  0.10780000   0.68492423
  0.10780000   0.67911933
  0.10780000   0.67337812
  0.10780000   0.66769947
  0.10800000   0.82856996
  0.10800000   0.82155838
  0.10800000   0.81463522
  0.10800000   0.80779845
  0.10800000   0.80104610
  0.10800000   0.79437631
  0.10800000   0.78778725
  0.10800000   0.78127719
  0.10800000   0.77484442
  0.10800000   0.76848733
  0.10800000   0.76220435
  0.10800000   0.75599396
  0.10800000   0.74985469
  0.10800000   0.74378513
  0.10800000   0.73778391
  0.10800000   0.73184969
  0.10800000   0.72598121
  0.10800000   0.72017720
  0.10800000   0.71443648
  0.10800000   0.70875786
  0.10800000   0.70314022
  0.10800000   0.69758247
  0.10800000   0.69208352
  0.10800000   0.68664236
  0.10820000   0.84080410
  0.10820000   0.83417282
  0.10820000   0.82762260
  0.10820000   0.82115163
  0.10820000   0.81475811
  0.10820000   0.80844034
  0.10820000   0.80219667
  0.10820000   0.79602551
  0.10820000   0.78992533
  0.10820000   0.78389465
  0.10820000   0.77793203
  0.10820000   0.77203609
  0.10820000   0.76620549
  0.10820000   0.76043895
  0.10820000   0.75473520
  0.10820000   0.74909305
  0.10820000   0.74351131
  0.10820000   0.73798884
  0.10820000   0.73252456
  0.10820000   0.72711738
  0.10820000   0.72176627
  0.10820000   0.71647023
  0.10820000   0.71122827
  0.10820000   0.70603946
  0.10840000   0.85319451
  0.10840000   0.84695433
  0.10840000   0.84078813
  0.10840000   0.83469425
  0.10840000   0.82867109
  0.10840000   0.82271710
  0.10840000   0.81683079
  0.10840000   0.81101073
  0.10840000   0.80525553
  0.10840000   0.79956385
  0.10840000   0.79393439
  0.10840000   0.78836590
  0.10840000   0.78285717
  0.10840000   0.77740702
  0.10840000   0.77201431
  0.10840000   0.76667795
  0.10840000   0.76139686
  0.10840000   0.75617003
  0.10840000   0.75099643
  0.10840000   0.74587510
  0.10840000   0.74080510
  0.10840000   0.73578551
  0.10840000   0.73081544
  0.10840000   0.72589402
  0.10860000   0.86574185
  0.10860000   0.85990365
  0.10860000   0.85413258
  0.10860000   0.84842714
  0.10860000   0.84278591
  0.10860000   0.83720751
  0.10860000   0.83169060
  0.10860000   0.82623389
  0.10860000   0.82083613
  0.10860000   0.81549611
  0.10860000   0.81021268
  0.10860000   0.80498471
  0.10860000   0.79981109
  0.10860000   0.79469077
  0.10860000   0.78962274
  0.10860000   0.78460599
  0.10860000   0.77963956
  0.10860000   0.77472251
  0.10860000   0.76985395
  0.10860000   0.76503299
  0.10860000   0.76025877
  0.10860000   0.75553048
  0.10860000   0.75084729
  0.10860000   0.74620843
  0.10880000   0.87844673
  0.10880000   0.87302141
  0.10880000   0.86765660
  0.10880000   0.86235099
  0.10880000   0.85710332
  0.10880000   0.85191234
  0.10880000   0.84677688
  0.10880000   0.84169579
  0.10880000   0.83666796
  0.10880000   0.83169231
  0.10880000   0.82676781
  0.10880000   0.82189344
  0.10880000   0.81706823
  0.10880000   0.81229123
  0.10880000   0.80756154
  0.10880000   0.80287825
  0.10880000   0.79824050
  0.10880000   0.79364747
  0.10880000   0.78909833
  0.10880000   0.78459229
  0.10880000   0.78012859
  0.10880000   0.77570648
  0.10880000   0.77132524
  0.10880000   0.76698416
  0.10900000   0.89130964
  0.10900000   0.88630811
  0.10900000   0.88136073
  0.10900000   0.87646635
  0.10900000   0.87162385
  0.10900000   0.86683215
  0.10900000   0.86209021
  0.10900000   0.85739703
  0.10900000   0.85275161
  0.10900000   0.84815302
  0.10900000   0.84360033
  0.10900000   0.83909266
  0.10900000   0.83462914
  0.10900000   0.83020894
  0.10900000   0.82583124
  0.10900000   0.82149525
  0.10900000   0.81720021
  0.10900000   0.81294538
  0.10900000   0.80873003
  0.10900000   0.80455346
  0.10900000   0.80041498
  0.10900000   0.79631394
  0.10900000   0.79224969
  0.10900000   0.78822159
  0.10920000   0.90433098
  0.10920000   0.89976416
  0.10920000   0.89524536
  0.10920000   0.89077359
  0.10920000   0.88634788
  0.10920000   0.88196729
  0.10920000   0.87763092
  0.10920000   0.87333789
  0.10920000   0.86908734
  0.10920000   0.86487846
  0.10920000   0.86071044
  0.10920000   0.85658251
  0.10920000   0.85249392
  0.10920000   0.84844392
  0.10920000   0.84443181
  0.10920000   0.84045689
  0.10920000   0.83651851
  0.10920000   0.83261600
  0.10920000   0.82874873
  0.10920000   0.82491607
  0.10920000   0.82111744
  0.10920000   0.81735225
  0.10920000   0.81361992
  0.10920000   0.80991991
  0.10940000   0.91751104
  0.10940000   0.91338983
  0.10940000   0.90931075
  0.10940000   0.90527294
  0.10940000   0.90127559
  0.10940000   0.89731789
  0.10940000   0.89339907
  0.10940000   0.88951839
  0.10940000   0.88567510
  0.10940000   0.88186851
  0.10940000   0.87809792
  0.10940000   0.87436268
  0.10940000   0.87066212
  0.10940000   0.86699563
  0.10940000   0.86336258
  0.10940000   0.85976238
  0.10940000   0.85619445
  0.10940000   0.85265823
  0.10940000   0.84915317
  0.10940000   0.84567873
  0.10940000   0.84223439
  0.10940000   0.83881964
  0.10940000   0.83543400
  0.10940000   0.83207697
  0.10960000   0.93085000
  0.10960000   0.92718526
  0.10960000   0.92355697
  0.10960000   0.91996443
  0.10960000   0.91640694
  0.10960000   0.91288383
  0.10960000   0.90939447
  0.10960000   0.90593821
  0.10960000   0.90251445
  0.10960000   0.89912260
  0.10960000   0.89576207
  0.10960000   0.89243231
  0.10960000   0.88913276
  0.10960000   0.88586290
  0.10960000   0.88262219
  0.10960000   0.87941015
  0.10960000   0.87622628
  0.10960000   0.87307009
  0.10960000   0.86994113
  0.10960000   0.86683893
  0.10960000   0.86376306
  0.10960000   0.86071308
  0.10960000   0.85768856
  0.10960000   0.85468911
  0.10980000   0.94434791
  0.10980000   0.94115044
  0.10980000   0.93798395
  0.10980000   0.93484787
  0.10980000   0.93174164
  0.10980000   0.92866472
  0.10980000   0.92561658
  0.10980000   0.92259670
  0.10980000   0.91960459
  0.10980000   0.91663975
  0.10980000   0.91370172
  0.10980000   0.91079003
  0.10980000   0.90790422
  0.10980000   0.90504387
  0.10980000   0.90220854
  0.10980000   0.89939781
  0.10980000   0.89661128
  0.10980000   0.89384856
  0.10980000   0.89110925
  0.10980000   0.88839298
  0.10980000   0.88569937
  0.10980000   0.88302808
  0.10980000   0.88037874
  0.10980000   0.87775102
  0.11000000   0.95800468
  0.11000000   0.95528518
  0.11000000   0.95259140
  0.11000000   0.94992288
  0.11000000   0.94727918
  0.11000000   0.94465988
  0.11000000   0.94206457
  0.11000000   0.93949282
  0.11000000   0.93694426
  0.11000000   0.93441848
  0.11000000   0.93191513
  0.11000000   0.92943382
  0.11000000   0.92697420
  0.11000000   0.92453592
  0.11000000   0.92211864
  0.11000000   0.91972203
  0.11000000   0.91734576
  0.11000000   0.91498951
  0.11000000   0.91265296
  0.11000000   0.91033583
  0.11000000   0.90803781
  0.11000000   0.90575861
  0.11000000   0.90349794
  0.11000000   0.90125554
  0.11020000   0.97182009
  0.11020000   0.96958916
  0.11020000   0.96737885
  0.11020000   0.96518882
  0.11020000   0.96301875
  0.11020000   0.96086832
  0.11020000   0.95873721
  0.11020000   0.95662511
  0.11020000   0.95453173
  0.11020000   0.95245678
  0.11020000   0.95039996
  0.11020000   0.94836101
  0.11020000   0.94633965
  0.11020000   0.94433561
  0.11020000   0.94234864
  0.11020000   0.94037847
  0.11020000   0.93842487
  0.11020000   0.93648757
  0.11020000   0.93456636
  0.11020000   0.93266099
  0.11020000   0.93077124
  0.11020000   0.92889687
  0.11020000   0.92703768
  0.11020000   0.92519345
  0.11040000   0.98579374
  0.11040000   0.98406183
  0.11040000   0.98234560
  0.11040000   0.98064482
  0.11040000   0.97895926
  0.11040000   0.97728869
  0.11040000   0.97563290
  0.11040000   0.97399167
  0.11040000   0.97236479
  0.11040000   0.97075205
  0.11040000   0.96915326
  0.11040000   0.96756821
  0.11040000   0.96599672
  0.11040000   0.96443859
  0.11040000   0.96289364
  0.11040000   0.96136169
  0.11040000   0.95984256
  0.11040000   0.95833607
  0.11040000   0.95684205
  0.11040000   0.95536034
  0.11040000   0.95389077
  0.11040000   0.95243318
  0.11040000   0.95098741
  0.11040000   0.94955331
  0.11060000   0.99992510
  0.11060000   0.99870248
  0.11060000   0.99749073
  0.11060000   0.99628971
  0.11060000   0.99509928
  0.11060000   0.99391929
  0.11060000   0.99274961
  0.11060000   0.99159011
  0.11060000   0.99044064
  0.11060000   0.98930109
  0.11060000   0.98817133
  0.11060000   0.98705123
  0.11060000   0.98594066
  0.11060000   0.98483952
  0.11060000   0.98374768
  0.11060000   0.98266502
  0.11060000   0.98159144
  0.11060000   0.98052681
  0.11060000   0.97947103
  0.11060000   0.97842400
  0.11060000   0.97738560
  0.11060000   0.97635573
  0.11060000   0.97533429
  0.11060000   0.97432118
  0.11080000   1.01421341
  0.11080000   1.01351015
  0.11080000   1.01281305
  0.11080000   1.01212204
  0.11080000   1.01143705
  0.11080000   1.01075801
  0.11080000   1.01008485
  0.11080000   1.00941751
  0.11080000   1.00875592
  0.11080000   1.00810001
  0.11080000   1.00744972
  0.11080000   1.00680500
  0.11080000   1.00616577
  0.11080000   1.00553199
  0.11080000   1.00490358
  0.11080000   1.00428048
  0.11080000   1.00366265
  0.11080000   1.00305003
  0.11080000   1.00244255
  0.11080000   1.00184016
  0.11080000   1.00124281
  0.11080000   1.00065044
  0.11080000   1.00006301
  0.11080000   0.99948045
  0.11100000   1.02865777
  0.11100000   1.02848369
  0.11100000   1.02831111
  0.11100000   1.02814004
  0.11100000   1.02797044
  0.11100000   1.02780231
  0.11100000   1.02763563
  0.11100000   1.02747039
  0.11100000   1.02730658
  0.11100000   1.02714417
  0.11100000   1.02698317
  0.11100000   1.02682355
  0.11100000   1.02666530
  0.11100000   1.02650841
  0.11100000   1.02635287
  0.11100000   1.02619866
  0.11100000   1.02604577
  0.11100000   1.02589419
  0.11100000   1.02574391
  0.11100000   1.02559491
  0.11100000   1.02544719
  0.11100000   1.02530073
  0.11100000   1.02515552
  0.11100000   1.02501154
  0.11120000   1.04325704
  0.11120000   1.04362166
  0.11120000   1.04398317
  0.11120000   1.04434158
  0.11120000   1.04469691
  0.11120000   1.04504919
  0.11120000   1.04539843
  0.11120000   1.04574466
  0.11120000   1.04608790
  0.11120000   1.04642816
  0.11120000   1.04676548
  0.11120000   1.04709987
  0.11120000   1.04743135
  0.11120000   1.04775995
  0.11120000   1.04808568
  0.11120000   1.04840857
  0.11120000   1.04872863
  0.11120000   1.04904589
  0.11120000   1.04936037
  0.11120000   1.04967208
  0.11120000   1.04998105
  0.11120000   1.05028731
  0.11120000   1.05059086
  0.11120000   1.05089173
  0.11140000   1.05800987
  0.11140000   1.05892240
  0.11140000   1.05982716
  0.11140000   1.06072418
  0.11140000   1.06161350
  0.11140000   1.06249514
  0.11140000   1.06336915
  0.11140000   1.06423555
  0.11140000   1.06509439
  0.11140000   1.06594570
  0.11140000   1.06678952
  0.11140000   1.06762589
  0.11140000   1.06845484
  0.11140000   1.06927640
  0.11140000   1.07009063
  0.11140000   1.07089756
  0.11140000   1.07169722
  0.11140000   1.07248966
  0.11140000   1.07327491
  0.11140000   1.07405303
  0.11140000   1.07482403
  0.11140000   1.07558798
  0.11140000   1.07634490
  0.11140000   1.07709483
  0.11160000   1.07291466
  0.11160000   1.07438393
  0.11160000   1.07584070
  0.11160000   1.07728497
  0.11160000   1.07871677
  0.11160000   1.08013613
  0.11160000   1.08154306
  0.11160000   1.08293760
  0.11160000   1.08431977
  0.11160000   1.08568959
  0.11160000   1.08704710
  0.11160000   1.08839233
  0.11160000   1.08972532
  0.11160000   1.09104609
  0.11160000   1.09235470
  0.11160000   1.09365116
  0.11160000   1.09493553
  0.11160000   1.09620784
  0.11160000   1.09746814
  0.11160000   1.09871648
  0.11160000   1.09995288
  0.11160000   1.10117741
  0.11160000   1.10239010
  0.11160000   1.10359102
  0.11180000   1.08796959
  0.11180000   1.09000400
  0.11180000   1.09202102
  0.11180000   1.09402064
  0.11180000   1.09600282
  0.11180000   1.09796754
  0.11180000   1.09991480
  0.11180000   1.10184457
  0.11180000   1.10375685
  0.11180000   1.10565163
  0.11180000   1.10752890
  0.11180000   1.10938868
  0.11180000   1.11123097
  0.11180000   1.11305577
  0.11180000   1.11486310
  0.11180000   1.11665297
  0.11180000   1.11842541
  0.11180000   1.12018043
  0.11180000   1.12191806
  0.11180000   1.12363834
  0.11180000   1.12534129
  0.11180000   1.12702694
  0.11180000   1.12869535
  0.11180000   1.13034655
  0.11200000   1.10317254
  0.11200000   1.10578000
  0.11200000   1.10836500
  0.11200000   1.11092743
  0.11200000   1.11346718
  0.11200000   1.11598415
  0.11200000   1.11847825
  0.11200000   1.12094941
  0.11200000   1.12339753
  0.11200000   1.12582256
  0.11200000   1.12822442
  0.11200000   1.13060306
  0.11200000   1.13295843
  0.11200000   1.13529049
  0.11200000   1.13759919
  0.11200000   1.13988451
  0.11200000   1.14214641
  0.11200000   1.14438489
  0.11200000   1.14659993
  0.11200000   1.14879153
  0.11200000   1.15095968
  0.11200000   1.15310439
  0.11200000   1.15522568
  0.11200000   1.15732357
  0.11220000   1.11852111
  0.11220000   1.12170902
  0.11220000   1.12486909
  0.11220000   1.12800110
  0.11220000   1.13110483
  0.11220000   1.13418005
  0.11220000   1.13722656
  0.11220000   1.14024418
  0.11220000   1.14323271
  0.11220000   1.14619199
  0.11220000   1.14912186
  0.11220000   1.15202216
  0.11220000   1.15489275
  0.11220000   1.15773351
  0.11220000   1.16054432
  0.11220000   1.16332508
  0.11220000   1.16607568
  0.11220000   1.16879605
  0.11220000   1.17148611
  0.11220000   1.17414580
  0.11220000   1.17677506
  0.11220000   1.17937386
  0.11220000   1.18194217
  0.11220000   1.18447997
  0.11240000   1.13401261
  0.11240000   1.13778773
  0.11240000   1.14152930
  0.11240000   1.14523690
  0.11240000   1.14891014
  0.11240000   1.15254865
  0.11240000   1.15615206
  0.11240000   1.15972003
  0.11240000   1.16325222
  0.11240000   1.16674833
  0.11240000   1.17020805
  0.11240000   1.17363111
  0.11240000   1.17701723
  0.11240000   1.18036619
  0.11240000   1.18367774
  0.11240000   1.18695167
  0.11240000   1.19018779
  0.11240000   1.19338592
  0.11240000   1.19654591
  0.11240000   1.19966760
  0.11240000   1.20275087
  0.11240000   1.20579562
  0.11240000   1.20880176
  0.11240000   1.21176920
  0.11260000   1.14964400
  0.11260000   1.15401247
  0.11260000   1.15834118
  0.11260000   1.16262952
  0.11260000   1.16687686
  0.11260000   1.17108261
  0.11260000   1.17524620
  0.11260000   1.17936709
  0.11260000   1.18344474
  0.11260000   1.18747867
  0.11260000   1.19146838
  0.11260000   1.19541343
  0.11260000   1.19931339
  0.11260000   1.20316786
  0.11260000   1.20697645
  0.11260000   1.21073883
  0.11260000   1.21445465
  0.11260000   1.21812362
  0.11260000   1.22174547
  0.11260000   1.22531996
  0.11260000   1.22884686
  0.11260000   1.23232598
  0.11260000   1.23575716
  0.11260000   1.23914025
  0.11280000   1.16541191
  0.11280000   1.17037910
  0.11280000   1.17529979
  0.11280000   1.18017306
  0.11280000   1.18499801
  0.11280000   1.18977377
  0.11280000   1.19449952
  0.11280000   1.19917444
  0.11280000   1.20379777
  0.11280000   1.20836876
  0.11280000   1.21288671
  0.11280000   1.21735094
  0.11280000   1.22176082
  0.11280000   1.22611575
  0.11280000   1.23041516
  0.11280000   1.23465853
  0.11280000   1.23884537
  0.11280000   1.24297523
  0.11280000   1.24704770
  0.11280000   1.25106241
  0.11280000   1.25501903
  0.11280000   1.25891726
  0.11280000   1.26275686
  0.11280000   1.26653762
  0.11300000   1.18131259
  0.11300000   1.18688309
  0.11300000   1.19239965
  0.11300000   1.19786100
  0.11300000   1.20326590
  0.11300000   1.20861315
  0.11300000   1.21390158
  0.11300000   1.21913006
  0.11300000   1.22429752
  0.11300000   1.22940292
  0.11300000   1.23444527
  0.11300000   1.23942363
  0.11300000   1.24433712
  0.11300000   1.24918488
  0.11300000   1.25396613
  0.11300000   1.25868013
  0.11300000   1.26332621
  0.11300000   1.26790374
  0.11300000   1.27241215
  0.11300000   1.27685093
  0.11300000   1.28121962
  0.11300000   1.28551782
  0.11300000   1.28974520
  0.11300000   1.29390146
  0.11320000   1.19734191
  0.11320000   1.20351940
  0.11320000   1.20963472
  0.11320000   1.21568617
  0.11320000   1.22167209
  0.11320000   1.22759086
  0.11320000   1.23344091
  0.11320000   1.23922073
  0.11320000   1.24492887
  0.11320000   1.25056395
  0.11320000   1.25612463
  0.11320000   1.26160964
  0.11320000   1.26701780
  0.11320000   1.27234799
  0.11320000   1.27759915
  0.11320000   1.28277030
  0.11320000   1.28786054
  0.11320000   1.29286906
  0.11320000   1.29779510
  0.11320000   1.30263801
  0.11320000   1.30739720
  0.11320000   1.31207216
  0.11320000   1.31666248
  0.11320000   1.32116782
  0.11340000   1.21349532
  0.11340000   1.22028251
  0.11340000   1.22699838
  0.11340000   1.23364070
  0.11340000   1.24020729
  0.11340000   1.24669606
  0.11340000   1.25310495
  0.11340000   1.25943200
  0.11340000   1.26567531
  0.11340000   1.27183308
  0.11340000   1.27790357
  0.11340000   1.28388515
  0.11340000   1.28977628
  0.11340000   1.29557550
  0.11340000   1.30128148
  0.11340000   1.30689296
  0.11340000   1.31240880
  0.11340000   1.31782797
  0.11340000   1.32314955
  0.11340000   1.32837272
  0.11340000   1.33349678
  0.11340000   1.33852114
  0.11340000   1.34344533
  0.11340000   1.34826899
  0.11360000   1.22976784
  0.11360000   1.23716639
  0.11360000   1.24448338
  0.11360000   1.25171596
  0.11360000   1.25886138
  0.11360000   1.26591693
  0.11360000   1.27288001
  0.11360000   1.27974812
  0.11360000   1.28651885
  0.11360000   1.29318990
  0.11360000   1.29975909
  0.11360000   1.30622436
  0.11360000   1.31258375
  0.11360000   1.31883548
  0.11360000   1.32497785
  0.11360000   1.33100934
  0.11360000   1.33692856
  0.11360000   1.34273427
  0.11360000   1.34842537
  0.11360000   1.35400091
  0.11360000   1.35946012
  0.11360000   1.36480234
  0.11360000   1.37002710
  0.11360000   1.37513407
  0.11380000   1.24615400
  0.11380000   1.25416441
  0.11380000   1.26208179
  0.11380000   1.26990258
  0.11380000   1.27762330
  0.11380000   1.28524059
  0.11380000   1.29275120
  0.11380000   1.30015201
  0.11380000   1.30744001
  0.11380000   1.31461235
  0.11380000   1.32166634
  0.11380000   1.32859943
  0.11380000   1.33540925
  0.11380000   1.34209360
  0.11380000   1.34865048
  0.11380000   1.35507804
  0.11380000   1.36137467
  0.11380000   1.36753891
  0.11380000   1.37356955
  0.11380000   1.37946555
  0.11380000   1.38522608
  0.11380000   1.39085052
  0.11380000   1.39633846
  0.11400000   1.26264787
  0.11400000   1.27126940
  0.11400000   1.27978502
  0.11400000   1.28819034
  0.11400000   1.29648108
  0.11400000   1.30465310
  0.11400000   1.31270242
  0.11400000   1.32062518
  0.11400000   1.32841774
  0.11400000   1.33607663
  0.11400000   1.34359857
  0.11400000   1.35098050
  0.11400000   1.35821960
  0.11400000   1.36531327
  0.11400000   1.37225914
  0.11400000   1.37905512
  0.11400000   1.38569935
  0.11400000   1.39219026
  0.11400000   1.39852652
  0.11400000   1.40470708
  0.11400000   1.41073117
  0.11400000   1.41659829
  0.11400000   1.42230819
  0.11420000   1.27924299
  0.11420000   1.28847355
  0.11420000   1.29758373
  0.11420000   1.30656820
  0.11420000   1.31542176
  0.11420000   1.32413939
  0.11420000   1.33271626
  0.11420000   1.34114774
  0.11420000   1.34942943
  0.11420000   1.35755720
  0.11420000   1.36552716
  0.11420000   1.37333570
  0.11420000   1.38097953
  0.11420000   1.38845563
  0.11420000   1.39576135
  0.11420000   1.40289433
  0.11420000   1.40985256
  0.11420000   1.41663440
  0.11420000   1.42323853
  0.11420000   1.42966399
  0.11420000   1.43591019
  0.11420000   1.44197686
  0.11420000   1.44786409
  0.11440000   1.29593237
  0.11440000   1.30576840
  0.11440000   1.31546782
  0.11440000   1.32502421
  0.11440000   1.33443135
  0.11440000   1.34368320
  0.11440000   1.35277402
  0.11440000   1.36169831
  0.11440000   1.37045086
  0.11440000   1.37902682
  0.11440000   1.38742165
  0.11440000   1.39563119
  0.11440000   1.40365168
  0.11440000   1.41147976
  0.11440000   1.41911249
  0.11440000   1.42654734
  0.11440000   1.43378227
  0.11440000   1.44081564
  0.11440000   1.44764630
  0.11440000   1.45427352
  0.11440000   1.46069705
  0.11440000   1.46691705
  0.11440000   1.47293415
  0.11460000   1.31270845
  0.11460000   1.32314484
  0.11460000   1.33342641
  0.11460000   1.34354553
  0.11460000   1.35349481
  0.11460000   1.36326712
  0.11460000   1.37285569
  0.11460000   1.38225408
  0.11460000   1.39145623
  0.11460000   1.40045651
  0.11460000   1.40924975
  0.11460000   1.41783126
  0.11460000   1.42619685
  0.11460000   1.43434284
  0.11460000   1.44226614
  0.11460000   1.44996417
  0.11460000   1.45743494
  0.11460000   1.46467705
  0.11460000   1.47168963
  0.11460000   1.47847243
  0.11460000   1.48502573
  0.11460000   1.49135037
  0.11460000   1.49744772
  0.11480000   1.32956307
  0.11480000   1.34059303
  0.11480000   1.35144779
  0.11480000   1.36211834
  0.11480000   1.37259602
  0.11480000   1.38287250
  0.11480000   1.39293990
  0.11480000   1.40279076
  0.11480000   1.41241814
  0.11480000   1.42181566
  0.11480000   1.43097750
  0.11480000   1.43989849
  0.11480000   1.44857410
  0.11480000   1.45700046
  0.11480000   1.46517442
  0.11480000   1.47309355
  0.11480000   1.48075611
  0.11480000   1.48816110
  0.11480000   1.49530825
  0.11480000   1.50219797
  0.11480000   1.50883137
  0.11480000   1.51521024
  0.11480000   1.52133698
  0.11500000   1.34648746
  0.11500000   1.35810243
  0.11500000   1.36951939
  0.11500000   1.38072787
  0.11500000   1.39171777
  0.11500000   1.40247948
  0.11500000   1.41300393
  0.11500000   1.42328262
  0.11500000   1.43330772
  0.11500000   1.44307209
  0.11500000   1.45256936
  0.11500000   1.46179394
  0.11500000   1.47074108
  0.11500000   1.47940691
  0.11500000   1.48778843
  0.11500000   1.49588352
  0.11500000   1.50369099
  0.11500000   1.51121053
  0.11500000   1.51844270
  0.11500000   1.52538892
  0.11500000   1.53205145
  0.11500000   1.53843333
  0.11500000   1.54453835
  0.11520000   1.36347221
  0.11520000   1.37566172
  0.11520000   1.38762780
  0.11520000   1.39935833
  0.11520000   1.41084172
  0.11520000   1.42206698
  0.11520000   1.43302377
  0.11520000   1.44370257
  0.11520000   1.45409465
  0.11520000   1.46419220
  0.11520000   1.47398838
  0.11520000   1.48347735
  0.11520000   1.49265435
  0.11520000   1.50151568
  0.11520000   1.51005875
  0.11520000   1.51828208
  0.11520000   1.52618531
  0.11520000   1.53376915
  0.11520000   1.54103537
  0.11520000   1.54798676
  0.11520000   1.55462706
  0.11520000   1.56096095
  0.11520000   1.56699393
  0.11540000   1.38050725
  0.11540000   1.39325882
  0.11540000   1.40575868
  0.11540000   1.41799297
  0.11540000   1.42994845
  0.11540000   1.44161269
  0.11540000   1.45297413
  0.11540000   1.46402217
  0.11540000   1.47474728
  0.11540000   1.48514111
  0.11540000   1.49519649
  0.11540000   1.50490756
  0.11540000   1.51426975
  0.11540000   1.52327988
  0.11540000   1.53193608
  0.11540000   1.54023786
  0.11540000   1.54818608
  0.11540000   1.55578286
  0.11540000   1.56303158
  0.11540000   1.56993679
  0.11540000   1.57650416
  0.11540000   1.58274034
  0.11540000   1.58865293
  0.11560000   1.39758182
  0.11560000   1.41088084
  0.11560000   1.42389682
  0.11560000   1.43661398
  0.11560000   1.44901741
  0.11560000   1.46109318
  0.11560000   1.47282849
  0.11560000   1.48421178
  0.11560000   1.49523283
  0.11560000   1.50588290
  0.11560000   1.51615475
  0.11560000   1.52604276
  0.11560000   1.53554291
  0.11560000   1.54465286
  0.11560000   1.55337190
  0.11560000   1.56170096
  0.11560000   1.56964252
  0.11560000   1.57720061
  0.11560000   1.58438064
  0.11560000   1.59118938
  0.11560000   1.59763480
  0.11560000   1.60372596
  0.11560000   1.60947288
  0.11580000   1.41468445
  0.11580000   1.42851412
  0.11580000   1.44202609
  0.11580000   1.45520260
  0.11580000   1.46802699
  0.11580000   1.48048386
  0.11580000   1.49255923
  0.11580000   1.50424069
  0.11580000   1.51551754
  0.11580000   1.52638088
  0.11580000   1.53682372
  0.11580000   1.54684102
  0.11580000   1.55642975
  0.11580000   1.56558886
  0.11580000   1.57431925
  0.11580000   1.58262376
  0.11580000   1.59050704
  0.11580000   1.59797545
  0.11580000   1.60503697
  0.11580000   1.61170101
  0.11580000   1.61797826
  0.11580000   1.62388055
  0.11580000   1.62942065
  0.11600000   1.43180298
  0.11600000   1.44614413
  0.11600000   1.46012943
  0.11600000   1.47373905
  0.11600000   1.48695456
  0.11600000   1.49975913
  0.11600000   1.51213773
  0.11600000   1.52407731
  0.11600000   1.53556692
  0.11600000   1.54659787
  0.11600000   1.55716381
  0.11600000   1.56726075
  0.11600000   1.57688710
  0.11600000   1.58604364
  0.11600000   1.59473346
  0.11600000   1.60296183
  0.11600000   1.61073610
  0.11600000   1.61806553
  0.11600000   1.62496110
  0.11600000   1.63143531
  0.11600000   1.63750198
  0.11600000   1.64317601
  0.11600000   1.64847321
  0.11620000   1.44892450
  0.11620000   1.46375558
  0.11620000   1.47818893
  0.11620000   1.49220262
  0.11620000   1.50577650
  0.11620000   1.51889243
  0.11620000   1.53153452
  0.11620000   1.54368933
  0.11620000   1.55534605
  0.11620000   1.56649663
  0.11620000   1.57713582
  0.11620000   1.58726123
  0.11620000   1.59687332
  0.11620000   1.60597529
  0.11620000   1.61457300
  0.11620000   1.62267477
  0.11620000   1.63029120
  0.11620000   1.63743497
  0.11620000   1.64412053
  0.11620000   1.65036387
  0.11620000   1.65618227
  0.11620000   1.66159396
  0.11620000   1.66661794
  0.11640000   1.46603538
  0.11640000   1.48133232
  0.11640000   1.49618577
  0.11640000   1.51057171
  0.11640000   1.52446835
  0.11640000   1.53785641
  0.11640000   1.55071945
  0.11640000   1.56304403
  0.11640000   1.57481991
  0.11640000   1.58604020
  0.11640000   1.59670136
  0.11640000   1.60680324
  0.11640000   1.61634899
  0.11640000   1.62534491
  0.11640000   1.63380025
  0.11640000   1.64172701
  0.11640000   1.64913962
  0.11640000   1.65605464
  0.11640000   1.66249043
  0.11640000   1.66846680
  0.11640000   1.67400473
  0.11640000   1.67912595
  0.11640000   1.68385272
  0.11660000   1.48312126
  0.11660000   1.49885745
  0.11660000   1.51410033
  0.11660000   1.52882387
  0.11660000   1.54300483
  0.11660000   1.55662308
  0.11660000   1.56966197
  0.11660000   1.58210854
  0.11660000   1.59395372
  0.11660000   1.60519240
  0.11660000   1.61582344
  0.11660000   1.62584965
  0.11660000   1.63527758
  0.11660000   1.64411734
  0.11660000   1.65238226
  0.11660000   1.66008861
  0.11660000   1.66725515
  0.11660000   1.67390279
  0.11660000   1.68005413
  0.11660000   1.68573306
  0.11660000   1.69096436
  0.11660000   1.69577334
  0.11660000   1.70018547
  0.11680000   1.50016706
  0.11680000   1.51631325
  0.11680000   1.53191218
  0.11680000   1.54693593
  0.11680000   1.56136004
  0.11680000   1.57516395
  0.11680000   1.58833130
  0.11680000   1.60085019
  0.11680000   1.61271339
  0.11680000   1.62391831
  0.11680000   1.63446701
  0.11680000   1.64436603
  0.11680000   1.65362611
  0.11680000   1.66226187
  0.11680000   1.67029140
  0.11680000   1.67773577
  0.11680000   1.68461859
  0.11680000   1.69096542
  0.11680000   1.69680335
  0.11680000   1.70216046
  0.11680000   1.70706537
  0.11680000   1.71154686
  0.11680000   1.71563347
  0.11700000   1.51715699
  0.11700000   1.53368132
  0.11700000   1.54960020
  0.11700000   1.56488406
  0.11700000   1.57950762
  0.11700000   1.59345035
  0.11700000   1.60669679
  0.11700000   1.61923685
  0.11700000   1.63106591
  0.11700000   1.64218476
  0.11700000   1.65259951
  0.11700000   1.66232126
  0.11700000   1.67136574
  0.11700000   1.67975281
  0.11700000   1.68750589
  0.11700000   1.69465139
  0.11700000   1.70121806
  0.11700000   1.70723642
  0.11700000   1.71273811
  0.11700000   1.71775539
  0.11700000   1.72232062
  0.11700000   1.72646582
  0.11700000   1.73022235
  0.11720000   1.53407457
  0.11720000   1.55094254
  0.11720000   1.56714262
  0.11720000   1.58264394
  0.11720000   1.59742089
  0.11720000   1.61145357
  0.11720000   1.62472821
  0.11720000   1.63723734
  0.11720000   1.64897985
  0.11720000   1.65996087
  0.11720000   1.67019145
  0.11720000   1.67968813
  0.11720000   1.68847239
  0.11720000   1.69656999
  0.11720000   1.70401023
  0.11720000   1.71082522
  0.11720000   1.71704913
  0.11720000   1.72271747
  0.11720000   1.72786643
  0.11720000   1.73253228
  0.11720000   1.73675086
  0.11720000   1.74055713
  0.11720000   1.74398484
  0.11740000   1.55090271
  0.11740000   1.56807719
  0.11740000   1.58451716
  0.11740000   1.60019090
  0.11740000   1.61507307
  0.11740000   1.62914522
  0.11740000   1.64239609
  0.11740000   1.65482182
  0.11740000   1.66642583
  0.11740000   1.67721855
  0.11740000   1.68721692
  0.11740000   1.69644379
  0.11740000   1.70492712
  0.11740000   1.71269913
  0.11740000   1.71979542
  0.11740000   1.72625404
  0.11740000   1.73211466
  0.11740000   1.73741772
  0.11740000   1.74220376
  0.11740000   1.74651278
  0.11740000   1.75038371
  0.11740000   1.75385401
  0.11740000   1.75695938
  0.11760000   1.56762367
  0.11760000   1.58506501
  0.11760000   1.60170114
  0.11760000   1.61750010
  0.11760000   1.63243759
  0.11760000   1.64649748
  0.11760000   1.65967210
  0.11760000   1.67196224
  0.11760000   1.68337694
  0.11760000   1.69393294
  0.11760000   1.70365405
  0.11760000   1.71257021
  0.11760000   1.72071648
  0.11760000   1.72813202
  0.11760000   1.73485897
  0.11760000   1.74094142
  0.11760000   1.74642444
  0.11760000   1.75135319
  0.11760000   1.75577222
  0.11760000   1.75972481
  0.11760000   1.76325251
  0.11760000   1.76639477
  0.11760000   1.76918869
  0.11780000   1.58421921
  0.11780000   1.60188531
  0.11780000   1.61867162
  0.11780000   1.63454671
  0.11780000   1.64948824
  0.11780000   1.66348348
  0.11780000   1.67652944
  0.11780000   1.68863276
  0.11780000   1.69980920
  0.11780000   1.71008291
  0.11780000   1.71948541
  0.11780000   1.72805443
  0.11780000   1.73583269
  0.11780000   1.74286655
  0.11780000   1.74920478
  0.11780000   1.75489742
  0.11780000   1.75999468
  0.11780000   1.76454606
  0.11780000   1.76859963
  0.11780000   1.77220143
  0.11780000   1.77539506
  0.11780000   1.77822139
  0.11780000   1.78071838
  0.11800000   1.60067062
  0.11800000   1.61851706
  0.11800000   1.63540558
  0.11800000   1.65130617
  0.11800000   1.66619955
  0.11800000   1.68007756
  0.11800000   1.69294318
  0.11800000   1.70481011
  0.11800000   1.71570200
  0.11800000   1.72565137
  0.11800000   1.73469827
  0.11800000   1.74288882
  0.11800000   1.75027369
  0.11800000   1.75690659
  0.11800000   1.76284282
  0.11800000   1.76813807
  0.11800000   1.77284728
  0.11800000   1.77702375
  0.11800000   1.78071849
  0.11800000   1.78397970
  0.11800000   1.78685240
  0.11800000   1.78937828
  0.11800000   1.79159560
  0.11820000   1.61695879
  0.11820000   1.63493904
  0.11820000   1.65188008
  0.11820000   1.66775440
  0.11820000   1.68254700
  0.11820000   1.69625567
  0.11820000   1.70889067
  0.11820000   1.72047402
  0.11820000   1.73103838
  0.11820000   1.74062555
  0.11820000   1.74928480
  0.11820000   1.75707102
  0.11820000   1.76404301
  0.11820000   1.77026169
  0.11820000   1.77578862
  0.11820000   1.78068468
  0.11820000   1.78500895
  0.11820000   1.78881793
  0.11820000   1.79216489
  0.11820000   1.79509949
  0.11820000   1.79766756
  0.11820000   1.79991101
  0.11820000   1.80186789
  0.11840000   1.63306435
  0.11840000   1.65113000
  0.11840000   1.66807248
  0.11840000   1.68386805
  0.11840000   1.69850742
  0.11840000   1.71199571
  0.11840000   1.72435187
  0.11840000   1.73560751
  0.11840000   1.74580534
  0.11840000   1.75499723
  0.11840000   1.76324213
  0.11840000   1.77060394
  0.11840000   1.77714948
  0.11840000   1.78294661
  0.11840000   1.78806266
  0.11840000   1.79256306
  0.11840000   1.79651039
  0.11840000   1.79996356
  0.11840000   1.80297741
  0.11840000   1.80560239
  0.11840000   1.80788448
  0.11840000   1.80986528
  0.11840000   1.81158212
  0.11860000   1.64896777
  0.11860000   1.66706879
  0.11860000   1.68396065
  0.11860000   1.69962481
  0.11860000   1.71405920
  0.11860000   1.72727782
  0.11860000   1.73930968
  0.11860000   1.75019719
  0.11860000   1.75999403
  0.11860000   1.76876275
  0.11860000   1.77657227
  0.11860000   1.78349545
  0.11860000   1.78960685
  0.11860000   1.79498077
  0.11860000   1.79968963
  0.11860000   1.80380270
  0.11860000   1.80738523
  0.11860000   1.81049782
  0.11860000   1.81319611
  0.11860000   1.81553067
  0.11860000   1.81754705
  0.11860000   1.81928600
  0.11860000   1.82078373
  0.11880000   1.66464948
  0.11880000   1.68273457
  0.11880000   1.69952320
  0.11880000   1.71500364
  0.11880000   1.72918266
  0.11880000   1.74208467
  0.11880000   1.75375017
  0.11880000   1.76423344
  0.11880000   1.77359986
  0.11880000   1.78192304
  0.11880000   1.78928193
  0.11880000   1.79575808
  0.11880000   1.80143328
  0.11880000   1.80638758
  0.11880000   1.81069768
  0.11880000   1.81443587
  0.11880000   1.81766922
  0.11880000   1.82045922
  0.11880000   1.82286160
  0.11880000   1.82492641
  0.11880000   1.82669825
  0.11880000   1.82821656
  0.11880000   1.82951606
  0.11900000   1.68009003
  0.11900000   1.69810700
  0.11900000   1.71473974
  0.11900000   1.72998505
  0.11900000   1.74386026
  0.11900000   1.75640179
  0.11900000   1.76766286
  0.11900000   1.77771052
  0.11900000   1.78662244
  0.11900000   1.79448342
  0.11900000   1.80138220
  0.11900000   1.80740853
  0.11900000   1.81265072
  0.11900000   1.81719370
  0.11900000   1.82111759
  0.11900000   1.82449676
  0.11900000   1.82739927
  0.11900000   1.82988671
  0.11900000   1.83201422
  0.11900000   1.83383077
  0.11900000   1.83537952
  0.11900000   1.83669825
  0.11900000   1.83781989
  0.11920000   1.69527023
  0.11920000   1.71316642
  0.11920000   1.72959107
  0.11920000   1.74455137
  0.11920000   1.75807695
  0.11920000   1.77021772
  0.11920000   1.78104076
  0.11920000   1.79062665
  0.11920000   1.79906556
  0.11920000   1.80645338
  0.11920000   1.81288817
  0.11920000   1.81846714
  0.11920000   1.82328425
  0.11920000   1.82742835
  0.11920000   1.83098198
  0.11920000   1.83402068
  0.11920000   1.83661268
  0.11920000   1.83881891
  0.11920000   1.84069335
  0.11920000   1.84228335
  0.11920000   1.84363025
  0.11920000   1.84476988
  0.11920000   1.84573318
  0.11940000   1.71017137
  0.11940000   1.72789411
  0.11940000   1.74405947
  0.11940000   1.75868698
  0.11940000   1.77182031
  0.11940000   1.78352420
  0.11940000   1.79388054
  0.11940000   1.80298389
  0.11940000   1.81093693
  0.11940000   1.81784621
  0.11940000   1.82381842
  0.11940000   1.82895730
  0.11940000   1.83336142
  0.11940000   1.83712251
  0.11940000   1.84032456
  0.11940000   1.84304334
  0.11940000   1.84534645
  0.11940000   1.84729356
  0.11940000   1.84893687
  0.11940000   1.85032177
  0.11940000   1.85148744
  0.11940000   1.85246754
  0.11940000   1.85329088
  0.11960000   1.72477533
  0.11960000   1.74227243
  0.11960000   1.75812892
  0.11960000   1.77237857
  0.11960000   1.78508074
  0.11960000   1.79631624
  0.11960000   1.80618245
  0.11960000   1.81478804
  0.11960000   1.82224793
  0.11960000   1.82867863
  0.11960000   1.83419451
  0.11960000   1.83890481
  0.11960000   1.84291155
  0.11960000   1.84630828
  0.11960000   1.84917941
  0.11960000   1.85160015
  0.11960000   1.85363672
  0.11960000   1.85534691
  0.11960000   1.85678078
  0.11960000   1.85798136
  0.11960000   1.85898547
  0.11960000   1.85982446
  0.11960000   1.86052491
  0.11980000   1.73906480
  0.11980000   1.75628511
  0.11980000   1.77178527
  0.11980000   1.78561526
  0.11980000   1.79785162
  0.11980000   1.80859220
  0.11980000   1.81795024
  0.11980000   1.82604841
  0.11980000   1.83301321
  0.11980000   1.83897025
  0.11980000   1.84404043
  0.11980000   1.84833726
  0.11980000   1.85196508
  0.11980000   1.85501817
  0.11980000   1.85758045
  0.11980000   1.85972573
  0.11980000   1.86151824
  0.11980000   1.86301344
  0.11980000   1.86425885
  0.11980000   1.86529493
  0.11980000   1.86615598
  0.11980000   1.86687096
  0.11980000   1.86746420
  0.12000000   1.75302347
  0.12000000   1.76991739
  0.12000000   1.78501650
  0.12000000   1.79838881
  0.12000000   1.81012936
  0.12000000   1.82035370
  0.12000000   1.82919102
  0.12000000   1.83677750
  0.12000000   1.84325036
  0.12000000   1.84874311
  0.12000000   1.85338195
  0.12000000   1.85728342
  0.12000000   1.86055298
  0.12000000   1.86328460
  0.12000000   1.86556084
  0.12000000   1.86745343
  0.12000000   1.86902409
  0.12000000   1.87032554
  0.12000000   1.87140250
  0.12000000   1.87229272
  0.12000000   1.87302789
  0.12000000   1.87363454
  0.12000000   1.87413482
  0.12020000   1.76663621
  0.12020000   1.78315624
  0.12020000   1.79781282
  0.12020000   1.81069369
  0.12020000   1.82191339
  0.12020000   1.83160555
  0.12020000   1.83991502
  0.12020000   1.84699068
  0.12020000   1.85297935
  0.12020000   1.85802113
  0.12020000   1.86224616
  0.12020000   1.86577269
  0.12020000   1.86870619
  0.12020000   1.87113937
  0.12020000   1.87315262
  0.12020000   1.87481503
  0.12020000   1.87618537
  0.12020000   1.87731334
  0.12020000   1.87824070
  0.12020000   1.87900236
  0.12020000   1.87962741
  0.12020000   1.88014000
  0.12020000   1.88056012
  0.12040000   1.77988922
  0.12040000   1.79599053
  0.12040000   1.81016686
  0.12040000   1.82252713
  0.12040000   1.83320614
  0.12040000   1.84235555
  0.12040000   1.85013526
  0.12040000   1.85670577
  0.12040000   1.86222213
  0.12040000   1.86682960
  0.12040000   1.87066084
  0.12040000   1.87383457
  0.12040000   1.87645519
  0.12040000   1.87861325
  0.12040000   1.88038637
  0.12040000   1.88184047
  0.12040000   1.88303108
  0.12040000   1.88400466
  0.12040000   1.88479993
  0.12040000   1.88544894
  0.12040000   1.88597821
  0.12040000   1.88640955
  0.12040000   1.88676091
  0.12060000   1.79277027
  0.12060000   1.80841114
  0.12060000   1.82207368
  0.12060000   1.83388913
  0.12060000   1.84401288
  0.12060000   1.85261429
  0.12060000   1.85986728
  0.12060000   1.86594264
  0.12060000   1.87100215
  0.12060000   1.87519468
  0.12060000   1.87865405
  0.12060000   1.88149822
  0.12060000   1.88382955
  0.12060000   1.88573571
  0.12060000   1.88729096
  0.12060000   1.88855772
  0.12060000   1.88958802
  0.12060000   1.89042500
  0.12060000   1.89110428
  0.12060000   1.89165512
  0.12060000   1.89210151
  0.12060000   1.89246304
  0.12060000   1.89275572
  0.12080000   1.80526878
  0.12080000   1.82041115
  0.12080000   1.83353089
  0.12080000   1.84478240
  0.12080000   1.85434164
  0.12080000   1.86239483
  0.12080000   1.86912869
  0.12080000   1.87472274
  0.12080000   1.87934383
  0.12080000   1.88314294
  0.12080000   1.88625365
  0.12080000   1.88879209
  0.12080000   1.89085771
  0.12080000   1.89253465
  0.12080000   1.89389343
  0.12080000   1.89499267
  0.12080000   1.89588079
  0.12080000   1.89659756
  0.12080000   1.89717553
  0.12080000   1.89764125
  0.12080000   1.89801628
  0.12080000   1.89831813
  0.12080000   1.89856097
  0.12100000   1.81737597
  0.12100000   1.83198582
  0.12100000   1.84453860
  0.12100000   1.85521227
  0.12100000   1.86420288
  0.12100000   1.87171243
  0.12100000   1.87793888
  0.12100000   1.88306872
  0.12100000   1.88727222
  0.12100000   1.89070092
  0.12100000   1.89348695
  0.12100000   1.89574360
  0.12100000   1.89756666
  0.12100000   1.89903627
  0.12100000   1.90021887
  0.12100000   1.90116914
  0.12100000   1.90193181
  0.12100000   1.90254334
  0.12100000   1.90303327
  0.12100000   1.90342554
  0.12100000   1.90373943
  0.12100000   1.90399049
  0.12100000   1.90419120
  0.12120000   1.82908500
  0.12120000   1.84313273
  0.12120000   1.85509938
  0.12120000   1.86518649
  0.12120000   1.87360933
  0.12120000   1.88058421
  0.12120000   1.88631853
  0.12120000   1.89100396
  0.12120000   1.89481249
  0.12120000   1.89789481
  0.12120000   1.90038042
  0.12120000   1.90237890
  0.12120000   1.90398183
  0.12120000   1.90526495
  0.12120000   1.90629042
  0.12120000   1.90710889
  0.12120000   1.90776145
  0.12120000   1.90828127
  0.12120000   1.90869506
  0.12120000   1.90902424
  0.12120000   1.90928599
  0.12120000   1.90949402
  0.12120000   1.90965929
  0.12140000   1.84039102
  0.12140000   1.85385171
  0.12140000   1.86521819
  0.12140000   1.87471509
  0.12140000   1.88257566
  0.12140000   1.88902874
  0.12140000   1.89428927
  0.12140000   1.89855223
  0.12140000   1.90198968
  0.12140000   1.90475011
  0.12140000   1.90695941
  0.12140000   1.90872274
  0.12140000   1.91012699
  0.12140000   1.91124324
  0.12140000   1.91212926
  0.12140000   1.91283170
  0.12140000   1.91338806
  0.12140000   1.91382836
  0.12140000   1.91417658
  0.12140000   1.91445183
  0.12140000   1.91466929
  0.12140000   1.91484103
  0.12140000   1.91497660
  0.12160000   1.85129122
  0.12160000   1.86414485
  0.12160000   1.87490221
  0.12160000   1.88381013
  0.12160000   1.89111818
  0.12160000   1.89706578
  0.12160000   1.90187333
  0.12160000   1.90573731
  0.12160000   1.90882830
  0.12160000   1.91129141
  0.12160000   1.91324801
  0.12160000   1.91479830
  0.12160000   1.91602415
  0.12160000   1.91699183
  0.12160000   1.91775471
  0.12160000   1.91835548
  0.12160000   1.91882816
  0.12160000   1.91919980
  0.12160000   1.91949181
  0.12160000   1.91972114
  0.12160000   1.91990117
  0.12160000   1.92004242
  0.12160000   1.92015321
  0.12180000   1.86178484
  0.12180000   1.87401639
  0.12180000   1.88416070
  0.12180000   1.89248542
  0.12180000   1.89925452
  0.12180000   1.90471582
  0.12180000   1.90909318
  0.12180000   1.91258272
  0.12180000   1.91535215
  0.12180000   1.91754215
  0.12180000   1.91926889
  0.12180000   1.92062718
  0.12180000   1.92169362
  0.12180000   1.92252966
  0.12180000   1.92318428
  0.12180000   1.92369634
  0.12180000   1.92409656
  0.12180000   1.92440917
  0.12180000   1.92465320
  0.12180000   1.92484360
  0.12180000   1.92499209
  0.12180000   1.92510785
  0.12180000   1.92519805
  0.12200000   1.87187319
  0.12200000   1.88347265
  0.12200000   1.89300478
  0.12200000   1.90075628
  0.12200000   1.90700332
  0.12200000   1.91199988
  0.12200000   1.91597121
  0.12200000   1.91911142
  0.12200000   1.92158408
  0.12200000   1.92352455
  0.12200000   1.92504326
  0.12200000   1.92622932
  0.12200000   1.92715400
  0.12200000   1.92787390
  0.12200000   1.92843377
  0.12200000   1.92886877
  0.12200000   1.92920651
  0.12200000   1.92946857
  0.12200000   1.92967180
  0.12200000   1.92982933
  0.12200000   1.92995137
  0.12200000   1.93004589
  0.12200000   1.93011905
  0.12220000   1.88155953
  0.12220000   1.89252185
  0.12220000   1.90144719
  0.12220000   1.90863923
  0.12220000   1.91438392
  0.12220000   1.91893911
  0.12220000   1.92252948
  0.12220000   1.92534561
  0.12220000   1.92754583
  0.12220000   1.92925946
  0.12220000   1.93059081
  0.12220000   1.93162310
  0.12220000   1.93242225
  0.12220000   1.93304015
  0.12220000   1.93351741
  0.12220000   1.93388575
  0.12220000   1.93416982
  0.12220000   1.93438877
  0.12220000   1.93455744
  0.12220000   1.93468732
  0.12220000   1.93478727
  0.12220000   1.93486415
  0.12220000   1.93492325
  0.12240000   1.89084903
  0.12240000   1.90117394
  0.12240000   1.90950210
  0.12240000   1.91615171
  0.12240000   1.92141606
  0.12240000   1.92555456
  0.12240000   1.92878950
  0.12240000   1.93130657
  0.12240000   1.93325793
  0.12240000   1.93476635
  0.12240000   1.93592970
  0.12240000   1.93682530
  0.12240000   1.93751378
  0.12240000   1.93804244
  0.12240000   1.93844799
  0.12240000   1.93875887
  0.12240000   1.93899701
  0.12240000   1.93917934
  0.12240000   1.93931886
  0.12240000   1.93942556
  0.12240000   1.93950711
  0.12240000   1.93956942
  0.12240000   1.93961698
  0.12260000   1.89974866
  0.12260000   1.90944044
  0.12260000   1.91718478
  0.12260000   1.92331183
  0.12260000   1.92811961
  0.12260000   1.93186695
  0.12260000   1.93477204
  0.12260000   1.93701451
  0.12260000   1.93873965
  0.12260000   1.94006324
  0.12260000   1.94107662
  0.12260000   1.94185122
  0.12260000   1.94244251
  0.12260000   1.94289341
  0.12260000   1.94323694
  0.12260000   1.94349849
  0.12260000   1.94369749
  0.12260000   1.94384881
  0.12260000   1.94396381
  0.12260000   1.94405116
  0.12260000   1.94411747
  0.12260000   1.94416777
  0.12260000   1.94420589
  0.12280000   1.90826701
  0.12280000   1.91733417
  0.12280000   1.92451143
  0.12280000   1.93013808
  0.12280000   1.93451435
  0.12280000   1.93789645
  0.12280000   1.94049697
  0.12280000   1.94248852
  0.12280000   1.94400892
  0.12280000   1.94516678
  0.12280000   1.94604684
  0.12280000   1.94671474
  0.12280000   1.94722101
  0.12280000   1.94760440
  0.12280000   1.94789449
  0.12280000   1.94811384
  0.12280000   1.94827959
  0.12280000   1.94840476
  0.12280000   1.94849924
  0.12280000   1.94857049
  0.12280000   1.94862419
  0.12280000   1.94866463
  0.12280000   1.94869506
  0.12300000   1.91641416
  0.12300000   1.92486908
  0.12300000   1.93149886
  0.12300000   1.93664908
  0.12300000   1.94061974
  0.12300000   1.94366252
  0.12300000   1.94598317
  0.12300000   1.94774647
  0.12300000   1.94908239
  0.12300000   1.95009222
  0.12300000   1.95085422
  0.12300000   1.95142840
  0.12300000   1.95186058
  0.12300000   1.95218558
  0.12300000   1.95242979
  0.12300000   1.95261317
  0.12300000   1.95275078
  0.12300000   1.95285397
  0.12300000   1.95293130
  0.12300000   1.95298921
  0.12300000   1.95303254
  0.12300000   1.95306492
  0.12300000   1.95308909
  0.12320000   1.92420148
  0.12320000   1.93206000
  0.12320000   1.93816430
  0.12320000   1.94286340
  0.12320000   1.94645472
  0.12320000   1.94918381
  0.12320000   1.95124845
  0.12320000   1.95280500
  0.12320000   1.95397537
  0.12320000   1.95485353
  0.12320000   1.95551137
  0.12320000   1.95600354
  0.12320000   1.95637138
  0.12320000   1.95664605
  0.12320000   1.95685100
  0.12320000   1.95700382
  0.12320000   1.95711769
  0.12320000   1.95720247
  0.12320000   1.95726555
  0.12320000   1.95731244
  0.12320000   1.95734725
  0.12320000   1.95737307
  0.12320000   1.95739218
  0.12340000   1.93164143
  0.12340000   1.93892242
  0.12340000   1.94452515
  0.12340000   1.94879931
  0.12340000   1.95203763
  0.12340000   1.95447803
  0.12340000   1.95630949
  0.12340000   1.95767955
  0.12340000   1.95870193
  0.12340000   1.95946340
  0.12340000   1.96002969
  0.12340000   1.96045033
  0.12340000   1.96076248
  0.12340000   1.96099393
  0.12340000   1.96116540
  0.12340000   1.96129235
  0.12340000   1.96138626
  0.12340000   1.96145568
  0.12340000   1.96150694
  0.12340000   1.96154475
  0.12340000   1.96157261
  0.12340000   1.96159309
  0.12340000   1.96160812
  0.12360000   1.93874742
  0.12360000   1.94547229
  0.12360000   1.95059881
  0.12360000   1.95447466
  0.12360000   1.95738601
  0.12360000   1.95956190
  0.12360000   1.96118185
  0.12360000   1.96238435
  0.12360000   1.96327493
  0.12360000   1.96393335
  0.12360000   1.96441945
  0.12360000   1.96477793
  0.12360000   1.96504205
  0.12360000   1.96523648
  0.12360000   1.96537950
  0.12360000   1.96548462
  0.12360000   1.96556181
  0.12360000   1.96561845
  0.12360000   1.96565995
  0.12360000   1.96569031
  0.12360000   1.96571250
  0.12360000   1.96572867
  0.12360000   1.96574042
  0.12380000   1.94553352
  0.12380000   1.95172578
  0.12380000   1.95640245
  0.12380000   1.95990674
  0.12380000   1.96251655
  0.12380000   1.96445109
  0.12380000   1.96587996
  0.12380000   1.96693245
  0.12380000   1.96770609
  0.12380000   1.96827382
  0.12380000   1.96868991
  0.12380000   1.96899455
  0.12380000   1.96921738
  0.12380000   1.96938022
  0.12380000   1.96949914
  0.12380000   1.96958589
  0.12380000   1.96964913
  0.12380000   1.96969516
  0.12380000   1.96972862
  0.12380000   1.96975290
  0.12380000   1.96977048
  0.12380000   1.96978317
  0.12380000   1.96979229
  0.12400000   1.95201435
  0.12400000   1.95769915
  0.12400000   1.96195290
  0.12400000   1.96511214
  0.12400000   1.96744505
  0.12400000   1.96916025
  0.12400000   1.97041712
  0.12400000   1.97133582
  0.12400000   1.97200603
  0.12400000   1.97249422
  0.12400000   1.97284941
  0.12400000   1.97310755
  0.12400000   1.97329498
  0.12400000   1.97343097
  0.12400000   1.97352952
  0.12400000   1.97360088
  0.12400000   1.97365249
  0.12400000   1.97368976
  0.12400000   1.97371662
  0.12400000   1.97373594
  0.12400000   1.97374980
  0.12400000   1.97375969
  0.12400000   1.97376672
  0.12420000   1.95820484
  0.12420000   1.96340852
  0.12420000   1.96726652
  0.12420000   1.97010670
  0.12420000   1.97218636
  0.12420000   1.97370297
  0.12420000   1.97480558
  0.12420000   1.97560534
  0.12420000   1.97618439
  0.12420000   1.97660306
  0.12420000   1.97690540
  0.12420000   1.97712352
  0.12420000   1.97728072
  0.12420000   1.97739392
  0.12420000   1.97747534
  0.12420000   1.97753384
  0.12420000   1.97757580
  0.12420000   1.97760585
  0.12420000   1.97762731
  0.12420000   1.97764260
  0.12420000   1.97765345
  0.12420000   1.97766111
  0.12420000   1.97766648
  0.12440000   1.96412009
  0.12440000   1.96886976
  0.12440000   1.97235906
  0.12440000   1.97490541
  0.12440000   1.97675434
  0.12440000   1.97809180
  0.12440000   1.97905654
  0.12440000   1.97975093
  0.12440000   1.98024989
  0.12440000   1.98060795
  0.12440000   1.98086460
  0.12440000   1.98104838
  0.12440000   1.98117984
  0.12440000   1.98127377
  0.12440000   1.98134081
  0.12440000   1.98138858
  0.12440000   1.98142257
  0.12440000   1.98144669
  0.12440000   1.98146375
  0.12440000   1.98147578
  0.12440000   1.98148422
  0.12440000   1.98149009
  0.12440000   1.98149414
  0.12460000   1.96977516
  0.12460000   1.97409836
  0.12460000   1.97724558
  0.12460000   1.97952242
  0.12460000   1.98116190
  0.12460000   1.98233830
  0.12460000   1.98318022
  0.12460000   1.98378156
  0.12460000   1.98421038
  0.12460000   1.98451578
  0.12460000   1.98473305
  0.12460000   1.98488744
  0.12460000   1.98499703
  0.12460000   1.98507473
  0.12460000   1.98512973
  0.12460000   1.98516860
  0.12460000   1.98519601
  0.12460000   1.98521527
  0.12460000   1.98522877
  0.12460000   1.98523817
  0.12460000   1.98524467
  0.12460000   1.98524912
  0.12460000   1.98525213
  0.12480000   1.97518501
  0.12480000   1.97910931
  0.12480000   1.98194044
  0.12480000   1.98397098
  0.12480000   1.98542100
  0.12480000   1.98645310
  0.12480000   1.98718596
  0.12480000   1.98770537
  0.12480000   1.98807294
  0.12480000   1.98833273
  0.12480000   1.98851613
  0.12480000   1.98864545
  0.12480000   1.98873653
  0.12480000   1.98880059
  0.12480000   1.98884555
  0.12480000   1.98887705
  0.12480000   1.98889905
  0.12480000   1.98891436
  0.12480000   1.98892495
  0.12480000   1.98893224
  0.12480000   1.98893720
  0.12480000   1.98894053
  0.12480000   1.98894272
  0.12500000   1.98036428
  0.12500000   1.98391702
  0.12500000   1.98645719
  0.12500000   1.98826345
  0.12500000   1.98954266
  0.12500000   1.99044590
  0.12500000   1.99108221
  0.12500000   1.99152970
  0.12500000   1.99184394
  0.12500000   1.99206433
  0.12500000   1.99221871
  0.12500000   1.99232671
  0.12500000   1.99240217
  0.12500000   1.99245479
  0.12500000   1.99249140
  0.12500000   1.99251681
  0.12500000   1.99253438
  0.12500000   1.99254647
  0.12500000   1.99255473
  0.12500000   1.99256032
  0.12500000   1.99256405
  0.12500000   1.99256650
  0.12500000   1.99256805
  0.12520000   1.98532726
  0.12520000   1.98853526
  0.12520000   1.99080857
  0.12520000   1.99241131
  0.12520000   1.99353705
  0.12520000   1.99432554
  0.12520000   1.99487664
  0.12520000   1.99526119
  0.12520000   1.99552913
  0.12520000   1.99571558
  0.12520000   1.99584516
  0.12520000   1.99593508
  0.12520000   1.99599738
  0.12520000   1.99604045
  0.12520000   1.99607014
  0.12520000   1.99609054
  0.12520000   1.99610449
  0.12520000   1.99611397
  0.12520000   1.99612035
  0.12520000   1.99612458
  0.12520000   1.99612735
  0.12520000   1.99612909
  0.12520000   1.99613015
  0.12540000   1.99008775
  0.12540000   1.99297711
  0.12540000   1.99500654
  0.12540000   1.99642520
  0.12540000   1.99741344
  0.12540000   1.99810008
  0.12540000   1.99857619
  0.12540000   1.99890580
  0.12540000   1.99913366
  0.12540000   1.99929096
  0.12540000   1.99939940
  0.12540000   1.99947403
  0.12540000   1.99952529
  0.12540000   1.99956040
  0.12540000   1.99958437
  0.12540000   1.99960066
  0.12540000   1.99961167
  0.12540000   1.99961903
  0.12540000   1.99962390
  0.12540000   1.99962707
  0.12540000   1.99962906
  0.12540000   1.99963026
  0.12540000   1.99963093
  0.12560000   1.99465901
  0.12560000   1.99725491
  0.12560000   1.99906220
  0.12560000   2.00031489
  0.12560000   2.00118035
  0.12560000   2.00177683
  0.12560000   2.00218714
  0.12560000   2.00246894
  0.12560000   2.00266219
  0.12560000   2.00279453
  0.12560000   2.00288500
  0.12560000   2.00294673
  0.12560000   2.00298874
  0.12560000   2.00301725
  0.12560000   2.00303650
  0.12560000   2.00304944
  0.12560000   2.00305805
  0.12560000   2.00306371
  0.12560000   2.00306738
  0.12560000   2.00306969
  0.12560000   2.00307108
  0.12560000   2.00307186
  0.12560000   2.00307223
  0.12580000   1.99905371
  0.12580000   2.00138028
  0.12580000   2.00298589
  0.12580000   2.00408940
  0.12580000   2.00484552
  0.12580000   2.00536242
  0.12580000   2.00571514
  0.12580000   2.00595544
  0.12580000   2.00611890
  0.12580000   2.00622991
  0.12580000   2.00630515
  0.12580000   2.00635603
  0.12580000   2.00639034
  0.12580000   2.00641337
  0.12580000   2.00642875
  0.12580000   2.00643894
  0.12580000   2.00644562
  0.12580000   2.00644992
  0.12580000   2.00645263
  0.12580000   2.00645426
  0.12580000   2.00645518
  0.12580000   2.00645563
  0.12580000   2.00645577
  0.12600000   2.00328388
  0.12600000   2.00536409
  0.12600000   2.00678717
  0.12600000   2.00775697
  0.12600000   2.00841600
  0.12600000   2.00886286
  0.12600000   2.00916531
  0.12600000   2.00936969
  0.12600000   2.00950756
  0.12600000   2.00960040
  0.12600000   2.00966277
  0.12600000   2.00970456
  0.12600000   2.00973245
  0.12600000   2.00975096
  0.12600000   2.00976317
  0.12600000   2.00977113
  0.12600000   2.00977625
  0.12600000   2.00977946
  0.12600000   2.00978141
  0.12600000   2.00978251
  0.12600000   2.00978306
  0.12600000   2.00978325
  0.12600000   2.00978322
  0.12620000   2.00736088
  0.12620000   2.00921646
  0.12620000   2.01047483
  0.12620000   2.01132514
  0.12620000   2.01189819
  0.12620000   2.01228356
  0.12620000   2.01254226
  0.12620000   2.01271562
  0.12620000   2.01283158
  0.12620000   2.01290899
  0.12620000   2.01296051
  0.12620000   2.01299469
  0.12620000   2.01301725
  0.12620000   2.01303205
  0.12620000   2.01304166
  0.12620000   2.01304782
  0.12620000   2.01305168
  0.12620000   2.01305402
  0.12620000   2.01305537
  0.12620000   2.01305606
  0.12620000   2.01305633
  0.12620000   2.01305632
  0.12620000   2.01305615
  0.12640000   2.01129541
  0.12640000   2.01294680
  0.12640000   2.01405697
  0.12640000   2.01480080
  0.12640000   2.01529791
  0.12640000   2.01562945
  0.12640000   2.01585015
  0.12640000   2.01599681
  0.12640000   2.01609405
  0.12640000   2.01615837
  0.12640000   2.01620078
  0.12640000   2.01622861
  0.12640000   2.01624677
  0.12640000   2.01625851
  0.12640000   2.01626601
  0.12640000   2.01627071
  0.12640000   2.01627357
  0.12640000   2.01627523
  0.12640000   2.01627610
  0.12640000   2.01627646
  0.12640000   2.01627651
  0.12640000   2.01627636
  0.12640000   2.01627608
  0.12660000   2.01509748
  0.12660000   2.01656381
  0.12660000   2.01754101
  0.12660000   2.01819020
  0.12660000   2.01862042
  0.12660000   2.01890494
  0.12660000   2.01909275
  0.12660000   2.01921646
  0.12660000   2.01929776
  0.12660000   2.01935103
  0.12660000   2.01938578
  0.12660000   2.01940834
  0.12660000   2.01942286
  0.12660000   2.01943211
  0.12660000   2.01943790
  0.12660000   2.01944142
  0.12660000   2.01944348
  0.12660000   2.01944459
  0.12660000   2.01944509
  0.12660000   2.01944521
  0.12660000   2.01944508
  0.12660000   2.01944481
  0.12660000   2.01944446
  0.12680000   2.01877644
  0.12680000   2.02007552
  0.12680000   2.02093375
  0.12680000   2.02149903
  0.12680000   2.02187048
  0.12680000   2.02211405
  0.12680000   2.02227343
  0.12680000   2.02237750
  0.12680000   2.02244525
  0.12680000   2.02248919
  0.12680000   2.02251756
  0.12680000   2.02253574
  0.12680000   2.02254727
  0.12680000   2.02255448
  0.12680000   2.02255888
  0.12680000   2.02256147
  0.12680000   2.02256289
  0.12680000   2.02256357
  0.12680000   2.02256378
  0.12680000   2.02256370
  0.12680000   2.02256345
  0.12680000   2.02256309
  0.12680000   2.02256268
  0.12700000   2.02234097
  0.12700000   2.02348933
  0.12700000   2.02424137
  0.12700000   2.02473247
  0.12700000   2.02505240
  0.12700000   2.02526039
  0.12700000   2.02539529
  0.12700000   2.02548256
  0.12700000   2.02553882
  0.12700000   2.02557494
  0.12700000   2.02559797
  0.12700000   2.02561253
  0.12700000   2.02562161
  0.12700000   2.02562717
  0.12700000   2.02563045
  0.12700000   2.02563228
  0.12700000   2.02563320
  0.12700000   2.02563354
  0.12700000   2.02563353
  0.12700000   2.02563330
  0.12700000   2.02563295
  0.12700000   2.02563253
  0.12700000   2.02563208
  0.12720000   2.02579911
  0.12720000   2.02681201
  0.12720000   2.02746954
  0.12720000   2.02789519
  0.12720000   2.02817010
  0.12720000   2.02834724
  0.12720000   2.02846109
  0.12720000   2.02853404
  0.12720000   2.02858060
  0.12720000   2.02861015
  0.12720000   2.02862875
  0.12720000   2.02864033
  0.12720000   2.02864741
  0.12720000   2.02865161
  0.12720000   2.02865400
  0.12720000   2.02865524
  0.12720000   2.02865576
  0.12720000   2.02865583
  0.12720000   2.02865565
  0.12720000   2.02865530
  0.12720000   2.02865488
  0.12720000   2.02865441
  0.12720000   2.02865393
  0.12740000   2.02915831
  0.12740000   2.03004977
  0.12740000   2.03062337
  0.12740000   2.03099146
  0.12740000   2.03122709
  0.12740000   2.03137756
  0.12740000   2.03147337
  0.12740000   2.03153415
  0.12740000   2.03157252
  0.12740000   2.03159658
  0.12740000   2.03161151
  0.12740000   2.03162063
  0.12740000   2.03162607
  0.12740000   2.03162920
  0.12740000   2.03163086
  0.12740000   2.03163163
  0.12740000   2.03163183
  0.12740000   2.03163171
  0.12740000   2.03163138
  0.12740000   2.03163096
  0.12740000   2.03163047
  0.12740000   2.03162997
  0.12740000   2.03162947
  0.12760000   2.03242543
  0.12760000   2.03320829
  0.12760000   2.03370756
  0.12760000   2.03402511
  0.12760000   2.03422658
  0.12760000   2.03435404
  0.12760000   2.03443441
  0.12760000   2.03448487
  0.12760000   2.03451636
  0.12760000   2.03453584
  0.12760000   2.03454773
  0.12760000   2.03455485
  0.12760000   2.03455896
  0.12760000   2.03456121
  0.12760000   2.03456230
  0.12760000   2.03456269
  0.12760000   2.03456265
  0.12760000   2.03456237
  0.12760000   2.03456195
  0.12760000   2.03456145
  0.12760000   2.03456093
  0.12760000   2.03456040
  0.12760000   2.03455989
  0.12780000   2.03560675
  0.12780000   2.03629275
  0.12780000   2.03672634
  0.12780000   2.03699965
  0.12780000   2.03717145
  0.12780000   2.03727912
  0.12780000   2.03734632
  0.12780000   2.03738805
  0.12780000   2.03741377
  0.12780000   2.03742944
  0.12780000   2.03743883
  0.12780000   2.03744430
  0.12780000   2.03744734
  0.12780000   2.03744889
  0.12780000   2.03744953
  0.12780000   2.03744962
  0.12780000   2.03744939
  0.12780000   2.03744898
  0.12780000   2.03744848
  0.12780000   2.03744794
  0.12780000   2.03744739
  0.12780000   2.03744685
  0.12780000   2.03744632
  0.12800000   2.03870805
  0.12800000   2.03930787
  0.12800000   2.03968357
  0.12800000   2.03991822
  0.12800000   2.04006434
  0.12800000   2.04015501
  0.12800000   2.04021101
  0.12800000   2.04024538
  0.12800000   2.04026626
  0.12800000   2.04027878
  0.12800000   2.04028611
  0.12800000   2.04029024
  0.12800000   2.04029241
  0.12800000   2.04029340
  0.12800000   2.04029368
  0.12800000   2.04029354
  0.12800000   2.04029317
  0.12800000   2.04029267
  0.12800000   2.04029211
  0.12800000   2.04029153
  0.12800000   2.04029096
  0.12800000   2.04029040
  0.12800000   2.04028987
  0.12820000   2.04173464
  0.12820000   2.04225795
  0.12820000   2.04258273
  0.12820000   2.04278369
  0.12820000   2.04290763
  0.12820000   2.04298375
  0.12820000   2.04303024
  0.12820000   2.04305840
  0.12820000   2.04307526
  0.12820000   2.04308516
  0.12820000   2.04309080
  0.12820000   2.04309385
  0.12820000   2.04309533
  0.12820000   2.04309587
  0.12820000   2.04309586
  0.12820000   2.04309555
  0.12820000   2.04309506
  0.12820000   2.04309449
  0.12820000   2.04309389
  0.12820000   2.04309329
  0.12820000   2.04309270
  0.12820000   2.04309213
  0.12820000   2.04309159
  0.12840000   2.04469135
  0.12840000   2.04514690
  0.12840000   2.04542700
  0.12840000   2.04559867
  0.12840000   2.04570349
  0.12840000   2.04576718
  0.12840000   2.04580561
  0.12840000   2.04582857
  0.12840000   2.04584208
  0.12840000   2.04584983
  0.12840000   2.04585409
  0.12840000   2.04585626
  0.12840000   2.04585718
  0.12840000   2.04585736
  0.12840000   2.04585714
  0.12840000   2.04585668
  0.12840000   2.04585611
  0.12840000   2.04585549
  0.12840000   2.04585485
  0.12840000   2.04585423
  0.12840000   2.04585363
  0.12840000   2.04585306
  0.12840000   2.04585252
  0.12860000   2.04758258
  0.12860000   2.04797827
  0.12860000   2.04821925
  0.12860000   2.04836551
  0.12860000   2.04845389
  0.12860000   2.04850699
  0.12860000   2.04853862
  0.12860000   2.04855722
  0.12860000   2.04856794
  0.12860000   2.04857393
  0.12860000   2.04857707
  0.12860000   2.04857853
  0.12860000   2.04857900
  0.12860000   2.04857891
  0.12860000   2.04857851
  0.12860000   2.04857794
  0.12860000   2.04857731
  0.12860000   2.04857665
  0.12860000   2.04857599
  0.12860000   2.04857536
  0.12860000   2.04857475
  0.12860000   2.04857418
  0.12860000   2.04857364
  0.12880000   2.05041238
  0.12880000   2.05075528
  0.12880000   2.05096211
  0.12880000   2.05108637
  0.12880000   2.05116065
  0.12880000   2.05120474
  0.12880000   2.05123063
  0.12880000   2.05124560
  0.12880000   2.05125402
  0.12880000   2.05125856
  0.12880000   2.05126079
  0.12880000   2.05126168
  0.12880000   2.05126180
  0.12880000   2.05126149
  0.12880000   2.05126095
  0.12880000   2.05126031
  0.12880000   2.05125962
  0.12880000   2.05125893
  0.12880000   2.05125826
  0.12880000   2.05125762
  0.12880000   2.05125701
  0.12880000   2.05125644
  0.12880000   2.05125589
  0.12900000   2.05318439
  0.12900000   2.05348087
  0.12900000   2.05365793
  0.12900000   2.05376319
  0.12900000   2.05382541
  0.12900000   2.05386186
  0.12900000   2.05388294
  0.12900000   2.05389488
  0.12900000   2.05390141
  0.12900000   2.05390475
  0.12900000   2.05390625
  0.12900000   2.05390668
  0.12900000   2.05390652
  0.12900000   2.05390604
  0.12900000   2.05390540
  0.12900000   2.05390470
  0.12900000   2.05390397
  0.12900000   2.05390327
  0.12900000   2.05390259
  0.12900000   2.05390194
  0.12900000   2.05390133
  0.12900000   2.05390075
  0.12900000   2.05390021
  0.12920000   2.05590198
  0.12920000   2.05615770
  0.12920000   2.05630888
  0.12920000   2.05639778
  0.12920000   2.05644969
  0.12920000   2.05647968
  0.12920000   2.05649673
  0.12920000   2.05650615
  0.12920000   2.05651112
  0.12920000   2.05651350
  0.12920000   2.05651440
  0.12920000   2.05651447
  0.12920000   2.05651409
  0.12920000   2.05651348
  0.12920000   2.05651276
  0.12920000   2.05651201
  0.12920000   2.05651126
  0.12920000   2.05651054
  0.12920000   2.05650985
  0.12920000   2.05650920
  0.12920000   2.05650859
  0.12920000   2.05650802
  0.12920000   2.05650748
  0.12940000   2.05856816
  0.12940000   2.05878821
  0.12940000   2.05891692
  0.12940000   2.05899176
  0.12940000   2.05903490
  0.12940000   2.05905944
  0.12940000   2.05907311
  0.12940000   2.05908045
  0.12940000   2.05908414
  0.12940000   2.05908574
  0.12940000   2.05908616
  0.12940000   2.05908595
  0.12940000   2.05908540
  0.12940000   2.05908468
  0.12940000   2.05908390
  0.12940000   2.05908312
  0.12940000   2.05908235
  0.12940000   2.05908162
  0.12940000   2.05908093
  0.12940000   2.05908028
  0.12940000   2.05907967
  0.12940000   2.05907909
  0.12940000   2.05907856
  0.12960000   2.06118572
  0.12960000   2.06137458
  0.12960000   2.06148385
  0.12960000   2.06154663
  0.12960000   2.06158232
  0.12960000   2.06160227
  0.12960000   2.06161312
  0.12960000   2.06161875
  0.12960000   2.06162139
  0.12960000   2.06162236
  0.12960000   2.06162241
  0.12960000   2.06162196
  0.12960000   2.06162128
  0.12960000   2.06162048
  0.12960000   2.06161966
  0.12960000   2.06161885
  0.12960000   2.06161807
  0.12960000   2.06161734
  0.12960000   2.06161664
  0.12960000   2.06161599
  0.12960000   2.06161538
  0.12960000   2.06161481
  0.12960000   2.06161428
  0.12980000   2.06375715
  0.12980000   2.06391883
  0.12980000   2.06401131
  0.12980000   2.06406377
  0.12980000   2.06409314
  0.12980000   2.06410924
  0.12980000   2.06411776
  0.12980000   2.06412197
  0.12980000   2.06412376
  0.12980000   2.06412422
  0.12980000   2.06412396
  0.12980000   2.06412334
  0.12980000   2.06412255
  0.12980000   2.06412170
  0.12980000   2.06412085
  0.12980000   2.06412002
  0.12980000   2.06411924
  0.12980000   2.06411849
  0.12980000   2.06411780
  0.12980000   2.06411715
  0.12980000   2.06411654
  0.12980000   2.06411597
  0.12980000   2.06411544
  0.13000000   2.06628476
  0.13000000   2.06642278
  0.13000000   2.06650080
  0.13000000   2.06654445
  0.13000000   2.06656848
  0.13000000   2.06658136
  0.13000000   2.06658793
  0.13000000   2.06659098
  0.13000000   2.06659209
  0.13000000   2.06659214
  0.13000000   2.06659164
  0.13000000   2.06659088
  0.13000000   2.06659002
  0.13000000   2.06658912
  0.13000000   2.06658824
  0.13000000   2.06658741
  0.13000000   2.06658661
  0.13000000   2.06658587
  0.13000000   2.06658518
  0.13000000   2.06658453
  0.13000000   2.06658393
  0.13000000   2.06658336
  0.13000000   2.06658283
  0.13020000   2.06877062
  0.13020000   2.06888811
  0.13020000   2.06895369
  0.13020000   2.06898984
  0.13020000   2.06900937
  0.13020000   2.06901955
  0.13020000   2.06902453
  0.13020000   2.06902663
  0.13020000   2.06902718
  0.13020000   2.06902690
  0.13020000   2.06902622
  0.13020000   2.06902535
  0.13020000   2.06902443
  0.13020000   2.06902350
  0.13020000   2.06902261
  0.13020000   2.06902176
  0.13020000   2.06902097
  0.13020000   2.06902023
  0.13020000   2.06901953
  0.13020000   2.06901889
  0.13020000   2.06901828
  0.13020000   2.06901772
  0.13020000   2.06901719
  0.13040000   2.07121663
  0.13040000   2.07131634
  0.13040000   2.07137125
  0.13040000   2.07140103
  0.13040000   2.07141677
  0.13040000   2.07142472
  0.13040000   2.07142837
  0.13040000   2.07142970
  0.13040000   2.07142980
  0.13040000   2.07142927
  0.13040000   2.07142844
  0.13040000   2.07142749
  0.13040000   2.07142652
  0.13040000   2.07142557
  0.13040000   2.07142467
  0.13040000   2.07142382
  0.13040000   2.07142302
  0.13040000   2.07142228
  0.13040000   2.07142159
  0.13040000   2.07142095
  0.13040000   2.07142035
  0.13040000   2.07141978
  0.13040000   2.07141926
  0.13060000   2.07362453
  0.13060000   2.07370887
  0.13060000   2.07375466
  0.13060000   2.07377904
  0.13060000   2.07379160
  0.13060000   2.07379769
  0.13060000   2.07380026
  0.13060000   2.07380096
  0.13060000   2.07380070
  0.13060000   2.07379996
  0.13060000   2.07379902
  0.13060000   2.07379801
  0.13060000   2.07379701
  0.13060000   2.07379604
  0.13060000   2.07379513
  0.13060000   2.07379428
  0.13060000   2.07379349
  0.13060000   2.07379275
  0.13060000   2.07379206
  0.13060000   2.07379142
  0.13060000   2.07379082
  0.13060000   2.07379026
  0.13060000   2.07378973
  0.13080000   2.07599590
  0.13080000   2.07606699
  0.13080000   2.07610498
  0.13080000   2.07612480
  0.13080000   2.07613471
  0.13080000   2.07613925
  0.13080000   2.07614094
  0.13080000   2.07614114
  0.13080000   2.07614059
  0.13080000   2.07613969
  0.13080000   2.07613866
  0.13080000   2.07613761
  0.13080000   2.07613658
  0.13080000   2.07613560
  0.13080000   2.07613469
  0.13080000   2.07613384
  0.13080000   2.07613305
  0.13080000   2.07613231
  0.13080000   2.07613163
  0.13080000   2.07613099
  0.13080000   2.07613039
  0.13080000   2.07612983
  0.13080000   2.07612931
  0.13100000   2.07833219
  0.13100000   2.07839188
  0.13100000   2.07842323
  0.13100000   2.07843920
  0.13100000   2.07844690
  0.13100000   2.07845017
  0.13100000   2.07845114
  0.13100000   2.07845093
  0.13100000   2.07845015
  0.13100000   2.07844913
  0.13100000   2.07844803
  0.13100000   2.07844694
  0.13100000   2.07844590
  0.13100000   2.07844492
  0.13100000   2.07844400
  0.13100000   2.07844315
  0.13100000   2.07844236
  0.13100000   2.07844163
  0.13100000   2.07844095
  0.13100000   2.07844031
  0.13100000   2.07843972
  0.13100000   2.07843916
  0.13100000   2.07843864
  0.13120000   2.08063472
  0.13120000   2.08068462
  0.13120000   2.08071034
  0.13120000   2.08072308
  0.13120000   2.08072893
  0.13120000   2.08073116
  0.13120000   2.08073154
  0.13120000   2.08073100
  0.13120000   2.08073005
  0.13120000   2.08072893
  0.13120000   2.08072779
  0.13120000   2.08072667
  0.13120000   2.08072562
  0.13120000   2.08072463
  0.13120000   2.08072372
  0.13120000   2.08072287
  0.13120000   2.08072208
  0.13120000   2.08072135
  0.13120000   2.08072067
  0.13120000   2.08072004
  0.13120000   2.08071945
  0.13120000   2.08071889
  0.13120000   2.08071837
  0.13140000   2.08290472
  0.13140000   2.08294624
  0.13140000   2.08296717
  0.13140000   2.08297720
  0.13140000   2.08298153
  0.13140000   2.08298290
  0.13140000   2.08298281
  0.13140000   2.08298201
  0.13140000   2.08298092
  0.13140000   2.08297973
  0.13140000   2.08297855
  0.13140000   2.08297742
  0.13140000   2.08297636
  0.13140000   2.08297537
  0.13140000   2.08297446
  0.13140000   2.08297361
  0.13140000   2.08297283
  0.13140000   2.08297210
  0.13140000   2.08297142
  0.13140000   2.08297079
  0.13140000   2.08297020
  0.13140000   2.08296965
  0.13140000   2.08296913
  0.13160000   2.08514330
  0.13160000   2.08517766
  0.13160000   2.08519455
  0.13160000   2.08520232
  0.13160000   2.08520538
  0.13160000   2.08520606
  0.13160000   2.08520558
  0.13160000   2.08520458
  0.13160000   2.08520338
  0.13160000   2.08520213
  0.13160000   2.08520092
  0.13160000   2.08519978
  0.13160000   2.08519872
  0.13160000   2.08519773
  0.13160000   2.08519682
  0.13160000   2.08519598
  0.13160000   2.08519520
  0.13160000   2.08519448
  0.13160000   2.08519380
  0.13160000   2.08519317
  0.13160000   2.08519258
  0.13160000   2.08519203
  0.13160000   2.08519151
  0.13180000   2.08735149
  0.13180000   2.08737975
  0.13180000   2.08739324
  0.13180000   2.08739912
  0.13180000   2.08740114
  0.13180000   2.08740125
  0.13180000   2.08740047
  0.13180000   2.08739931
  0.13180000   2.08739802
  0.13180000   2.08739674
  0.13180000   2.08739551
  0.13180000   2.08739436
  0.13180000   2.08739330
  0.13180000   2.08739231
  0.13180000   2.08739141
  0.13180000   2.08739057
  0.13180000   2.08738979
  0.13180000   2.08738907
  0.13180000   2.08738840
  0.13180000   2.08738777
  0.13180000   2.08738718
  0.13180000   2.08738663
  0.13180000   2.08738612
  0.13200000   2.08953026
  0.13200000   2.08955333
  0.13200000   2.08956396
  0.13200000   2.08956827
  0.13200000   2.08956943
  0.13200000   2.08956909
  0.13200000   2.08956806
  0.13200000   2.08956678
  0.13200000   2.08956543
  0.13200000   2.08956411
  0.13200000   2.08956288
  0.13200000   2.08956172
  0.13200000   2.08956066
  0.13200000   2.08955968
  0.13200000   2.08955878
  0.13200000   2.08955794
  0.13200000   2.08955717
  0.13200000   2.08955645
  0.13200000   2.08955578
  0.13200000   2.08955515
  0.13200000   2.08955457
  0.13200000   2.08955402
  0.13200000   2.08955351
  0.13220000   2.09168049
  0.13220000   2.09169916
  0.13220000   2.09170739
  0.13220000   2.09171040
  0.13220000   2.09171086
  0.13220000   2.09171015
  0.13220000   2.09170893
  0.13220000   2.09170755
  0.13220000   2.09170616
  0.13220000   2.09170482
  0.13220000   2.09170358
  0.13220000   2.09170242
  0.13220000   2.09170136
  0.13220000   2.09170039
  0.13220000   2.09169949
  0.13220000   2.09169866
  0.13220000   2.09169788
  0.13220000   2.09169717
  0.13220000   2.09169650
  0.13220000   2.09169588
  0.13220000   2.09169529
  0.13220000   2.09169475
  0.13220000   2.09169423
  0.13240000   2.09380300
  0.13240000   2.09381795
  0.13240000   2.09382417
  0.13240000   2.09382611
  0.13240000   2.09382601
  0.13240000   2.09382500
  0.13240000   2.09382363
  0.13240000   2.09382217
  0.13240000   2.09382075
  0.13240000   2.09381940
  0.13240000   2.09381815
  0.13240000   2.09381700
  0.13240000   2.09381594
  0.13240000   2.09381497
  0.13240000   2.09381407
  0.13240000   2.09381324
  0.13240000   2.09381248
  0.13240000   2.09381176
  0.13240000   2.09381110
  0.13240000   2.09381048
  0.13240000   2.09380990
  0.13240000   2.09380935
  0.13240000   2.09380884
  0.13260000   2.09589856
  0.13260000   2.09591037
  0.13260000   2.09591492
  0.13260000   2.09591598
  0.13260000   2.09591542
  0.13260000   2.09591417
  0.13260000   2.09591269
  0.13260000   2.09591118
  0.13260000   2.09590972
  0.13260000   2.09590837
  0.13260000   2.09590712
  0.13260000   2.09590597
  0.13260000   2.09590492
  0.13260000   2.09590395
  0.13260000   2.09590306
  0.13260000   2.09590223
  0.13260000   2.09590147
  0.13260000   2.09590076
  0.13260000   2.09590009
  0.13260000   2.09589948
  0.13260000   2.09589890
  0.13260000   2.09589835
  0.13260000   2.09589784
  0.13280000   2.09796788
  0.13280000   2.09797706
  0.13280000   2.09798022
  0.13280000   2.09798055
  0.13280000   2.09797962
  0.13280000   2.09797819
  0.13280000   2.09797662
  0.13280000   2.09797507
  0.13280000   2.09797360
  0.13280000   2.09797224
  0.13280000   2.09797099
  0.13280000   2.09796985
  0.13280000   2.09796880
  0.13280000   2.09796784
  0.13280000   2.09796695
  0.13280000   2.09796613
  0.13280000   2.09796536
  0.13280000   2.09796466
  0.13280000   2.09796399
  0.13280000   2.09796338
  0.13280000   2.09796280
  0.13280000   2.09796226
  0.13280000   2.09796174
  0.13300000   2.10001165
  0.13300000   2.10001862
  0.13300000   2.10002063
  0.13300000   2.10002037
  0.13300000   2.10001914
  0.13300000   2.10001757
  0.13300000   2.10001593
  0.13300000   2.10001435
  0.13300000   2.10001287
  0.13300000   2.10001151
  0.13300000   2.10001026
  0.13300000   2.10000912
  0.13300000   2.10000808
  0.13300000   2.10000712
  0.13300000   2.10000623
  0.13300000   2.10000542
  0.13300000   2.10000466
  0.13300000   2.10000395
  0.13300000   2.10000329
  0.13300000   2.10000268
  0.13300000   2.10000210
  0.13300000   2.10000156
  0.13300000   2.10000105
  0.13320000   2.10203049
  0.13320000   2.10203561
  0.13320000   2.10203667
  0.13320000   2.10203593
  0.13320000   2.10203447
  0.13320000   2.10203279
  0.13320000   2.10203109
  0.13320000   2.10202949
  0.13320000   2.10202801
  0.13320000   2.10202665
  0.13320000   2.10202541
  0.13320000   2.10202427
  0.13320000   2.10202324
  0.13320000   2.10202228
  0.13320000   2.10202140
  0.13320000   2.10202058
  0.13320000   2.10201983
  0.13320000   2.10201912
  0.13320000   2.10201847
  0.13320000   2.10201785
  0.13320000   2.10201728
  0.13320000   2.10201673
  0.13320000   2.10201622
  0.13340000   2.10402500
  0.13340000   2.10402857
  0.13340000   2.10402886
  0.13340000   2.10402774
  0.13340000   2.10402609
  0.13340000   2.10402432
  0.13340000   2.10402259
  0.13340000   2.10402097
  0.13340000   2.10401949
  0.13340000   2.10401813
  0.13340000   2.10401690
  0.13340000   2.10401577
  0.13340000   2.10401473
  0.13340000   2.10401378
  0.13340000   2.10401290
  0.13340000   2.10401209
  0.13340000   2.10401134
  0.13340000   2.10401064
  0.13340000   2.10400998
  0.13340000   2.10400937
  0.13340000   2.10400879
  0.13340000   2.10400825
  0.13340000   2.10400774
  0.13360000   2.10599574
  0.13360000   2.10599803
  0.13360000   2.10599768
  0.13360000   2.10599625
  0.13360000   2.10599446
  0.13360000   2.10599262
  0.13360000   2.10599087
  0.13360000   2.10598925
  0.13360000   2.10598776
  0.13360000   2.10598641
  0.13360000   2.10598518
  0.13360000   2.10598406
  0.13360000   2.10598303
  0.13360000   2.10598208
  0.13360000   2.10598121
  0.13360000   2.10598040
  0.13360000   2.10597964
  0.13360000   2.10597894
  0.13360000   2.10597829
  0.13360000   2.10597768
  0.13360000   2.10597711
  0.13360000   2.10597657
  0.13360000   2.10597606
  0.13380000   2.10794324
  0.13380000   2.10794448
  0.13380000   2.10794362
  0.13380000   2.10794194
  0.13380000   2.10794003
  0.13380000   2.10793815
  0.13380000   2.10793638
  0.13380000   2.10793475
  0.13380000   2.10793327
  0.13380000   2.10793193
  0.13380000   2.10793070
  0.13380000   2.10792958
  0.13380000   2.10792856
  0.13380000   2.10792761
  0.13380000   2.10792674
  0.13380000   2.10792593
  0.13380000   2.10792519
  0.13380000   2.10792449
  0.13380000   2.10792384
  0.13380000   2.10792323
  0.13380000   2.10792265
  0.13380000   2.10792211
  0.13380000   2.10792161
  0.13400000   2.10986803
  0.13400000   2.10986839
  0.13400000   2.10986711
  0.13400000   2.10986524
  0.13400000   2.10986324
  0.13400000   2.10986132
  0.13400000   2.10985954
  0.13400000   2.10985792
  0.13400000   2.10985644
  0.13400000   2.10985510
  0.13400000   2.10985388
  0.13400000   2.10985277
  0.13400000   2.10985175
  0.13400000   2.10985081
  0.13400000   2.10984994
  0.13400000   2.10984914
  0.13400000   2.10984839
  0.13400000   2.10984769
  0.13400000   2.10984704
  0.13400000   2.10984643
  0.13400000   2.10984586
  0.13400000   2.10984532
  0.13400000   2.10984482
  0.13420000   2.11177057
  0.13420000   2.11177022
  0.13420000   2.11176860
  0.13420000   2.11176657
  0.13420000   2.11176452
  0.13420000   2.11176257
  0.13420000   2.11176079
  0.13420000   2.11175917
  0.13420000   2.11175770
  0.13420000   2.11175636
  0.13420000   2.11175515
  0.13420000   2.11175404
  0.13420000   2.11175302
  0.13420000   2.11175209
  0.13420000   2.11175122
  0.13420000   2.11175042
  0.13420000   2.11174968
  0.13420000   2.11174898
  0.13420000   2.11174833
  0.13420000   2.11174773
  0.13420000   2.11174715
  0.13420000   2.11174662
  0.13420000   2.11174611
  0.13440000   2.11365133
  0.13440000   2.11365040
  0.13440000   2.11364851
  0.13440000   2.11364637
  0.13440000   2.11364426
  0.13440000   2.11364230
  0.13440000   2.11364052
  0.13440000   2.11363890
  0.13440000   2.11363744
  0.13440000   2.11363611
  0.13440000   2.11363490
  0.13440000   2.11363380
  0.13440000   2.11363279
  0.13440000   2.11363185
  0.13440000   2.11363099
  0.13440000   2.11363019
  0.13440000   2.11362945
  0.13440000   2.11362876
  0.13440000   2.11362811
  0.13440000   2.11362750
  0.13440000   2.11362693
  0.13440000   2.11362639
  0.13440000   2.11362589
  0.13460000   2.11551076
  0.13460000   2.11550935
  0.13460000   2.11550725
  0.13460000   2.11550502
  0.13460000   2.11550288
  0.13460000   2.11550091
  0.13460000   2.11549913
  0.13460000   2.11549752
  0.13460000   2.11549606
  0.13460000   2.11549474
  0.13460000   2.11549354
  0.13460000   2.11549244
  0.13460000   2.11549143
  0.13460000   2.11549050
  0.13460000   2.11548964
  0.13460000   2.11548885
  0.13460000   2.11548811
  0.13460000   2.11548741
  0.13460000   2.11548677
  0.13460000   2.11548616
  0.13460000   2.11548559
  0.13460000   2.11548506
  0.13460000   2.11548455
  0.13480000   2.11734928
  0.13480000   2.11734749
  0.13480000   2.11734522
  0.13480000   2.11734292
  0.13480000   2.11734076
  0.13480000   2.11733879
  0.13480000   2.11733701
  0.13480000   2.11733540
  0.13480000   2.11733396
  0.13480000   2.11733264
  0.13480000   2.11733145
  0.13480000   2.11733035
  0.13480000   2.11732935
  0.13480000   2.11732842
  0.13480000   2.11732756
  0.13480000   2.11732677
  0.13480000   2.11732603
  0.13480000   2.11732534
  0.13480000   2.11732469
  0.13480000   2.11732409
  0.13480000   2.11732352
  0.13480000   2.11732298
  0.13480000   2.11732248
  0.13500000   2.11916729
  0.13500000   2.11916519
  0.13500000   2.11916279
  0.13500000   2.11916044
  0.13500000   2.11915827
  0.13500000   2.11915630
  0.13500000   2.11915453
  0.13500000   2.11915293
  0.13500000   2.11915149
  0.13500000   2.11915018
  0.13500000   2.11914899
  0.13500000   2.11914790
  0.13500000   2.11914690
  0.13500000   2.11914598
  0.13500000   2.11914512
  0.13500000   2.11914433
  0.13500000   2.11914359
  0.13500000   2.11914291
  0.13500000   2.11914226
  0.13500000   2.11914166
  0.13500000   2.11914109
  0.13500000   2.11914055
  0.13500000   2.11914005
  0.13520000   2.12096520
  0.13520000   2.12096285
  0.13520000   2.12096035
  0.13520000   2.12095797
  0.13520000   2.12095579
  0.13520000   2.12095383
  0.13520000   2.12095206
  0.13520000   2.12095047
  0.13520000   2.12094904
  0.13520000   2.12094774
  0.13520000   2.12094655
  0.13520000   2.12094546
  0.13520000   2.12094447
  0.13520000   2.12094355
  0.13520000   2.12094269
  0.13520000   2.12094190
  0.13520000   2.12094117
  0.13520000   2.12094048
  0.13520000   2.12093984
  0.13520000   2.12093923
  0.13520000   2.12093866
  0.13520000   2.12093813
  0.13520000   2.12093763
  0.13540000   2.12274337
  0.13540000   2.12274083
  0.13540000   2.12273826
  0.13540000   2.12273585
  0.13540000   2.12273367
  0.13540000   2.12273171
  0.13540000   2.12272996
  0.13540000   2.12272838
  0.13540000   2.12272695
  0.13540000   2.12272565
  0.13540000   2.12272447
  0.13540000   2.12272339
  0.13540000   2.12272240
  0.13540000   2.12272148
  0.13540000   2.12272063
  0.13540000   2.12271984
  0.13540000   2.12271910
  0.13540000   2.12271842
  0.13540000   2.12271778
  0.13540000   2.12271717
  0.13540000   2.12271661
  0.13540000   2.12271607
  0.13540000   2.12271557
  0.13560000   2.12450217
  0.13560000   2.12449949
  0.13560000   2.12449686
  0.13560000   2.12449444
  0.13560000   2.12449226
  0.13560000   2.12449031
  0.13560000   2.12448856
  0.13560000   2.12448699
  0.13560000   2.12448557
  0.13560000   2.12448428
  0.13560000   2.12448311
  0.13560000   2.12448203
  0.13560000   2.12448104
  0.13560000   2.12448012
  0.13560000   2.12447928
  0.13560000   2.12447849
  0.13560000   2.12447775
  0.13560000   2.12447707
  0.13560000   2.12447643
  0.13560000   2.12447582
  0.13560000   2.12447526
  0.13560000   2.12447472
  0.13560000   2.12447422
  0.13580000   2.12624197
  0.13580000   2.12623917
  0.13580000   2.12623650
  0.13580000   2.12623408
  0.13580000   2.12623191
  0.13580000   2.12622996
  0.13580000   2.12622822
  0.13580000   2.12622666
  0.13580000   2.12622525
  0.13580000   2.12622396
  0.13580000   2.12622279
  0.13580000   2.12622172
  0.13580000   2.12622073
  0.13580000   2.12621982
  0.13580000   2.12621897
  0.13580000   2.12621818
  0.13580000   2.12621745
  0.13580000   2.12621677
  0.13580000   2.12621613
  0.13580000   2.12621552
  0.13580000   2.12621496
  0.13580000   2.12621442
  0.13580000   2.12621392
  0.13600000   2.12796309
  0.13600000   2.12796021
  0.13600000   2.12795752
  0.13600000   2.12795509
  0.13600000   2.12795293
  0.13600000   2.12795099
  0.13600000   2.12794926
  0.13600000   2.12794771
  0.13600000   2.12794630
  0.13600000   2.12794502
  0.13600000   2.12794386
  0.13600000   2.12794279
  0.13600000   2.12794180
  0.13600000   2.12794089
  0.13600000   2.12794005
  0.13600000   2.12793926
  0.13600000   2.12793853
  0.13600000   2.12793785
  0.13600000   2.12793721
  0.13600000   2.12793661
  0.13600000   2.12793604
  0.13600000   2.12793551
  0.13600000   2.12793500
  0.13620000   2.12966588
  0.13620000   2.12966294
  0.13620000   2.12966023
  0.13620000   2.12965781
  0.13620000   2.12965565
  0.13620000   2.12965373
  0.13620000   2.12965201
  0.13620000   2.12965046
  0.13620000   2.12964906
  0.13620000   2.12964779
  0.13620000   2.12964662
  0.13620000   2.12964556
  0.13620000   2.12964457
  0.13620000   2.12964367
  0.13620000   2.12964282
  0.13620000   2.12964204
  0.13620000   2.12964131
  0.13620000   2.12964063
  0.13620000   2.12963999
  0.13620000   2.12963939
  0.13620000   2.12963882
  0.13620000   2.12963829
  0.13620000   2.12963778
  0.13640000   2.13135066
  0.13640000   2.13134767
  0.13640000   2.13134495
  0.13640000   2.13134254
  0.13640000   2.13134039
  0.13640000   2.13133848
  0.13640000   2.13133677
  0.13640000   2.13133523
  0.13640000   2.13133383
  0.13640000   2.13133257
  0.13640000   2.13133141
  0.13640000   2.13133034
  0.13640000   2.13132936
  0.13640000   2.13132846
  0.13640000   2.13132762
  0.13640000   2.13132683
  0.13640000   2.13132611
  0.13640000   2.13132542
  0.13640000   2.13132478
  0.13640000   2.13132418
  0.13640000   2.13132362
  0.13640000   2.13132309
  0.13640000   2.13132258
  0.13660000   2.13301773
  0.13660000   2.13301471
  0.13660000   2.13301200
  0.13660000   2.13300959
  0.13660000   2.13300746
  0.13660000   2.13300555
  0.13660000   2.13300385
  0.13660000   2.13300232
  0.13660000   2.13300093
  0.13660000   2.13299967
  0.13660000   2.13299851
  0.13660000   2.13299745
  0.13660000   2.13299647
  0.13660000   2.13299557
  0.13660000   2.13299473
  0.13660000   2.13299395
  0.13660000   2.13299322
  0.13660000   2.13299254
  0.13660000   2.13299190
  0.13660000   2.13299130
  0.13660000   2.13299074
  0.13660000   2.13299020
  0.13660000   2.13298970
  0.13680000   2.13466741
  0.13680000   2.13466437
  0.13680000   2.13466166
  0.13680000   2.13465927
  0.13680000   2.13465714
  0.13680000   2.13465525
  0.13680000   2.13465356
  0.13680000   2.13465203
  0.13680000   2.13465065
  0.13680000   2.13464939
  0.13680000   2.13464824
  0.13680000   2.13464718
  0.13680000   2.13464621
  0.13680000   2.13464530
  0.13680000   2.13464447
  0.13680000   2.13464369
  0.13680000   2.13464296
  0.13680000   2.13464228
  0.13680000   2.13464164
  0.13680000   2.13464104
  0.13680000   2.13464048
  0.13680000   2.13463994
  0.13680000   2.13463944
  0.13700000   2.13629999
  0.13700000   2.13629694
  0.13700000   2.13629424
  0.13700000   2.13629186
  0.13700000   2.13628974
  0.13700000   2.13628786
  0.13700000   2.13628618
  0.13700000   2.13628466
  0.13700000   2.13628328
  0.13700000   2.13628203
  0.13700000   2.13628088
  0.13700000   2.13627982
  0.13700000   2.13627885
  0.13700000   2.13627795
  0.13700000   2.13627711
  0.13700000   2.13627634
  0.13700000   2.13627561
  0.13700000   2.13627493
  0.13700000   2.13627429
  0.13700000   2.13627369
  0.13700000   2.13627313
  0.13700000   2.13627260
  0.13700000   2.13627209
  0.13720000   2.13791576
  0.13720000   2.13791271
  0.13720000   2.13791001
  0.13720000   2.13790764
  0.13720000   2.13790554
  0.13720000   2.13790367
  0.13720000   2.13790199
  0.13720000   2.13790048
  0.13720000   2.13789911
  0.13720000   2.13789786
  0.13720000   2.13789672
  0.13720000   2.13789566
  0.13720000   2.13789469
  0.13720000   2.13789379
  0.13720000   2.13789296
  0.13720000   2.13789218
  0.13720000   2.13789146
  0.13720000   2.13789078
  0.13720000   2.13789014
  0.13720000   2.13788954
  0.13720000   2.13788898
  0.13720000   2.13788844
  0.13720000   2.13788794
  0.13740000   2.13951499
  0.13740000   2.13951194
  0.13740000   2.13950927
  0.13740000   2.13950691
  0.13740000   2.13950482
  0.13740000   2.13950296
  0.13740000   2.13950129
  0.13740000   2.13949978
  0.13740000   2.13949842
  0.13740000   2.13949717
  0.13740000   2.13949603
  0.13740000   2.13949498
  0.13740000   2.13949401
  0.13740000   2.13949311
  0.13740000   2.13949228
  0.13740000   2.13949150
  0.13740000   2.13949078
  0.13740000   2.13949010
  0.13740000   2.13948946
  0.13740000   2.13948886
  0.13740000   2.13948830
  0.13740000   2.13948777
  0.13740000   2.13948726
  0.13760000   2.14109797
  0.13760000   2.14109493
  0.13760000   2.14109227
  0.13760000   2.14108992
  0.13760000   2.14108784
  0.13760000   2.14108599
  0.13760000   2.14108433
  0.13760000   2.14108283
  0.13760000   2.14108147
  0.13760000   2.14108023
  0.13760000   2.14107909
  0.13760000   2.14107804
  0.13760000   2.14107707
  0.13760000   2.14107618
  0.13760000   2.14107535
  0.13760000   2.14107457
  0.13760000   2.14107385
  0.13760000   2.14107317
  0.13760000   2.14107253
  0.13760000   2.14107193
  0.13760000   2.14107137
  0.13760000   2.14107084
  0.13760000   2.14107033
  0.13780000   2.14266495
  0.13780000   2.14266193
  0.13780000   2.14265928
  0.13780000   2.14265695
  0.13780000   2.14265488
  0.13780000   2.14265304
  0.13780000   2.14265139
  0.13780000   2.14264989
  0.13780000   2.14264854
  0.13780000   2.14264730
  0.13780000   2.14264616
  0.13780000   2.14264512
  0.13780000   2.14264415
  0.13780000   2.14264326
  0.13780000   2.14264243
  0.13780000   2.14264165
  0.13780000   2.14264093
  0.13780000   2.14264025
  0.13780000   2.14263961
  0.13780000   2.14263902
  0.13780000   2.14263845
  0.13780000   2.14263792
  0.13780000   2.14263742
  0.13800000   2.14421621
  0.13800000   2.14421320
  0.13800000   2.14421057
  0.13800000   2.14420825
  0.13800000   2.14420620
  0.13800000   2.14420436
  0.13800000   2.14420271
  0.13800000   2.14420123
  0.13800000   2.14419987
  0.13800000   2.14419864
  0.13800000   2.14419750
  0.13800000   2.14419646
  0.13800000   2.14419550
  0.13800000   2.14419461
  0.13800000   2.14419378
  0.13800000   2.14419300
  0.13800000   2.14419228
  0.13800000   2.14419160
  0.13800000   2.14419097
  0.13800000   2.14419037
  0.13800000   2.14418980
  0.13800000   2.14418927
  0.13800000   2.14418877
  0.13820000   2.14575199
  0.13820000   2.14574900
  0.13820000   2.14574638
  0.13820000   2.14574408
  0.13820000   2.14574203
  0.13820000   2.14574021
  0.13820000   2.14573857
  0.13820000   2.14573708
  0.13820000   2.14573574
  0.13820000   2.14573450
  0.13820000   2.14573337
  0.13820000   2.14573233
  0.13820000   2.14573137
  0.13820000   2.14573048
  0.13820000   2.14572965
  0.13820000   2.14572888
  0.13820000   2.14572815
  0.13820000   2.14572748
  0.13820000   2.14572684
  0.13820000   2.14572624
  0.13820000   2.14572568
  0.13820000   2.14572515
  0.13820000   2.14572464
  0.13840000   2.14727255
  0.13840000   2.14726957
  0.13840000   2.14726697
  0.13840000   2.14726468
  0.13840000   2.14726264
  0.13840000   2.14726083
  0.13840000   2.14725919
  0.13840000   2.14725771
  0.13840000   2.14725637
  0.13840000   2.14725514
  0.13840000   2.14725401
  0.13840000   2.14725297
  0.13840000   2.14725201
  0.13840000   2.14725112
  0.13840000   2.14725030
  0.13840000   2.14724952
  0.13840000   2.14724880
  0.13840000   2.14724812
  0.13840000   2.14724749
  0.13840000   2.14724689
  0.13840000   2.14724633
  0.13840000   2.14724579
  0.13840000   2.14724529
  0.13860000   2.14877812
  0.13860000   2.14877516
  0.13860000   2.14877257
  0.13860000   2.14877029
  0.13860000   2.14876827
  0.13860000   2.14876646
  0.13860000   2.14876483
  0.13860000   2.14876336
  0.13860000   2.14876202
  0.13860000   2.14876079
  0.13860000   2.14875967
  0.13860000   2.14875863
  0.13860000   2.14875767
  0.13860000   2.14875678
  0.13860000   2.14875595
  0.13860000   2.14875518
  0.13860000   2.14875446
  0.13860000   2.14875378
  0.13860000   2.14875315
  0.13860000   2.14875255
  0.13860000   2.14875199
  0.13860000   2.14875145
  0.13860000   2.14875095
  0.13880000   2.15026894
  0.13880000   2.15026600
  0.13880000   2.15026342
  0.13880000   2.15026116
  0.13880000   2.15025914
  0.13880000   2.15025734
  0.13880000   2.15025572
  0.13880000   2.15025425
  0.13880000   2.15025292
  0.13880000   2.15025169
  0.13880000   2.15025057
  0.13880000   2.15024953
  0.13880000   2.15024858
  0.13880000   2.15024769
  0.13880000   2.15024686
  0.13880000   2.15024609
  0.13880000   2.15024537
  0.13880000   2.15024469
  0.13880000   2.15024406
  0.13880000   2.15024346
  0.13880000   2.15024290
  0.13880000   2.15024236
  0.13880000   2.15024186
  0.13900000   2.15174524
  0.13900000   2.15174232
  0.13900000   2.15173976
  0.13900000   2.15173751
  0.13900000   2.15173550
  0.13900000   2.15173371
  0.13900000   2.15173209
  0.13900000   2.15173063
  0.13900000   2.15172929
  0.13900000   2.15172807
  0.13900000   2.15172695
  0.13900000   2.15172592
  0.13900000   2.15172496
  0.13900000   2.15172408
  0.13900000   2.15172325
  0.13900000   2.15172248
  0.13900000   2.15172176
  0.13900000   2.15172108
  0.13900000   2.15172045
  0.13900000   2.15171985
  0.13900000   2.15171929
  0.13900000   2.15171875
  0.13900000   2.15171825
  0.13920000   2.15320725
  0.13920000   2.15320435
  0.13920000   2.15320180
  0.13920000   2.15319956
  0.13920000   2.15319757
  0.13920000   2.15319578
  0.13920000   2.15319417
  0.13920000   2.15319271
  0.13920000   2.15319138
  0.13920000   2.15319016
  0.13920000   2.15318904
  0.13920000   2.15318801
  0.13920000   2.15318706
  0.13920000   2.15318617
  0.13920000   2.15318535
  0.13920000   2.15318458
  0.13920000   2.15318385
  0.13920000   2.15318318
  0.13920000   2.15318254
  0.13920000   2.15318195
  0.13920000   2.15318138
  0.13920000   2.15318085
  0.13920000   2.15318034
  0.13940000   2.15465519
  0.13940000   2.15465231
  0.13940000   2.15464978
  0.13940000   2.15464755
  0.13940000   2.15464556
  0.13940000   2.15464378
  0.13940000   2.15464218
  0.13940000   2.15464072
  0.13940000   2.15463939
  0.13940000   2.15463818
  0.13940000   2.15463706
  0.13940000   2.15463603
  0.13940000   2.15463508
  0.13940000   2.15463419
  0.13940000   2.15463337
  0.13940000   2.15463260
  0.13940000   2.15463188
  0.13940000   2.15463120
  0.13940000   2.15463057
  0.13940000   2.15462997
  0.13940000   2.15462940
  0.13940000   2.15462887
  0.13940000   2.15462837
  0.13960000   2.15608928
  0.13960000   2.15608641
  0.13960000   2.15608390
  0.13960000   2.15608168
  0.13960000   2.15607970
  0.13960000   2.15607793
  0.13960000   2.15607633
  0.13960000   2.15607487
  0.13960000   2.15607355
  0.13960000   2.15607234
  0.13960000   2.15607122
  0.13960000   2.15607019
  0.13960000   2.15606924
  0.13960000   2.15606836
  0.13960000   2.15606753
  0.13960000   2.15606676
  0.13960000   2.15606604
  0.13960000   2.15606537
  0.13960000   2.15606473
  0.13960000   2.15606413
  0.13960000   2.15606357
  0.13960000   2.15606304
  0.13960000   2.15606253
  0.13980000   2.15750973
  0.13980000   2.15750687
  0.13980000   2.15750437
  0.13980000   2.15750216
  0.13980000   2.15750019
  0.13980000   2.15749843
  0.13980000   2.15749683
  0.13980000   2.15749538
  0.13980000   2.15749406
  0.13980000   2.15749285
  0.13980000   2.15749174
  0.13980000   2.15749071
  0.13980000   2.15748976
  0.13980000   2.15748888
  0.13980000   2.15748805
  0.13980000   2.15748728
  0.13980000   2.15748656
  0.13980000   2.15748589
  0.13980000   2.15748525
  0.13980000   2.15748465
  0.13980000   2.15748409
  0.13980000   2.15748356
  0.13980000   2.15748305
  0.14000000   2.15891674
  0.14000000   2.15891390
  0.14000000   2.15891141
  0.14000000   2.15890921
  0.14000000   2.15890725
  0.14000000   2.15890549
  0.14000000   2.15890390
  0.14000000   2.15890245
  0.14000000   2.15890114
  0.14000000   2.15889993
  0.14000000   2.15889882
  0.14000000   2.15889779
  0.14000000   2.15889684
  0.14000000   2.15889596
  0.14000000   2.15889513
  0.14000000   2.15889437
  0.14000000   2.15889365
  0.14000000   2.15889297
  0.14000000   2.15889233
  0.14000000   2.15889174
  0.14000000   2.15889117
  0.14000000   2.15889064
  0.14000000   2.15889013
  0.14020000   2.16031051
  0.14020000   2.16030769
  0.14020000   2.16030522
  0.14020000   2.16030303
  0.14020000   2.16030107
  0.14020000   2.16029932
  0.14020000   2.16029773
  0.14020000   2.16029629
  0.14020000   2.16029497
  0.14020000   2.16029377
  0.14020000   2.16029266
  0.14020000   2.16029163
  0.14020000   2.16029068
  0.14020000   2.16028980
  0.14020000   2.16028898
  0.14020000   2.16028821
  0.14020000   2.16028749
  0.14020000   2.16028681
  0.14020000   2.16028618
  0.14020000   2.16028558
  0.14020000   2.16028502
  0.14020000   2.16028448
  0.14020000   2.16028398
  0.14040000   2.16169125
  0.14040000   2.16168845
  0.14040000   2.16168599
  0.14040000   2.16168381
  0.14040000   2.16168186
  0.14040000   2.16168011
  0.14040000   2.16167853
  0.14040000   2.16167709
  0.14040000   2.16167577
  0.14040000   2.16167457
  0.14040000   2.16167346
  0.14040000   2.16167244
  0.14040000   2.16167149
  0.14040000   2.16167061
  0.14040000   2.16166979
  0.14040000   2.16166902
  0.14040000   2.16166830
  0.14040000   2.16166762
  0.14040000   2.16166699
  0.14040000   2.16166639
  0.14040000   2.16166582
  0.14040000   2.16166529
  0.14040000   2.16166478
  0.14060000   2.16305915
  0.14060000   2.16305636
  0.14060000   2.16305391
  0.14060000   2.16305174
  0.14060000   2.16304980
  0.14060000   2.16304805
  0.14060000   2.16304648
  0.14060000   2.16304504
  0.14060000   2.16304373
  0.14060000   2.16304253
  0.14060000   2.16304142
  0.14060000   2.16304040
  0.14060000   2.16303945
  0.14060000   2.16303857
  0.14060000   2.16303775
  0.14060000   2.16303698
  0.14060000   2.16303626
  0.14060000   2.16303558
  0.14060000   2.16303495
  0.14060000   2.16303435
  0.14060000   2.16303378
  0.14060000   2.16303325
  0.14060000   2.16303274
  0.14080000   2.16441440
  0.14080000   2.16441162
  0.14080000   2.16440918
  0.14080000   2.16440702
  0.14080000   2.16440509
  0.14080000   2.16440335
  0.14080000   2.16440177
  0.14080000   2.16440034
  0.14080000   2.16439903
  0.14080000   2.16439783
  0.14080000   2.16439673
  0.14080000   2.16439571
  0.14080000   2.16439476
  0.14080000   2.16439388
  0.14080000   2.16439305
  0.14080000   2.16439229
  0.14080000   2.16439157
  0.14080000   2.16439089
  0.14080000   2.16439026
  0.14080000   2.16438966
  0.14080000   2.16438909
  0.14080000   2.16438856
  0.14080000   2.16438805
  0.14100000   2.16575718
  0.14100000   2.16575442
  0.14100000   2.16575199
  0.14100000   2.16574983
  0.14100000   2.16574791
  0.14100000   2.16574617
  0.14100000   2.16574460
  0.14100000   2.16574317
  0.14100000   2.16574187
  0.14100000   2.16574067
  0.14100000   2.16573956
  0.14100000   2.16573854
  0.14100000   2.16573760
  0.14100000   2.16573672
  0.14100000   2.16573589
  0.14100000   2.16573513
  0.14100000   2.16573441
  0.14100000   2.16573373
  0.14100000   2.16573309
  0.14100000   2.16573250
  0.14100000   2.16573193
  0.14100000   2.16573139
  0.14100000   2.16573089
  0.14120000   2.16708767
  0.14120000   2.16708493
  0.14120000   2.16708251
  0.14120000   2.16708036
  0.14120000   2.16707844
  0.14120000   2.16707671
  0.14120000   2.16707514
  0.14120000   2.16707372
  0.14120000   2.16707241
  0.14120000   2.16707122
  0.14120000   2.16707011
  0.14120000   2.16706909
  0.14120000   2.16706815
  0.14120000   2.16706727
  0.14120000   2.16706645
  0.14120000   2.16706568
  0.14120000   2.16706496
  0.14120000   2.16706428
  0.14120000   2.16706365
  0.14120000   2.16706305
  0.14120000   2.16706248
  0.14120000   2.16706194
  0.14120000   2.16706144
  0.14140000   2.16840606
  0.14140000   2.16840333
  0.14140000   2.16840092
  0.14140000   2.16839878
  0.14140000   2.16839687
  0.14140000   2.16839514
  0.14140000   2.16839358
  0.14140000   2.16839215
  0.14140000   2.16839085
  0.14140000   2.16838966
  0.14140000   2.16838855
  0.14140000   2.16838754
  0.14140000   2.16838659
  0.14140000   2.16838571
  0.14140000   2.16838489
  0.14140000   2.16838412
  0.14140000   2.16838340
  0.14140000   2.16838273
  0.14140000   2.16838209
  0.14140000   2.16838149
  0.14140000   2.16838092
  0.14140000   2.16838039
  0.14140000   2.16837988
  0.14160000   2.16971252
  0.14160000   2.16970980
  0.14160000   2.16970740
  0.14160000   2.16970527
  0.14160000   2.16970336
  0.14160000   2.16970164
  0.14160000   2.16970008
  0.14160000   2.16969866
  0.14160000   2.16969736
  0.14160000   2.16969616
  0.14160000   2.16969506
  0.14160000   2.16969404
  0.14160000   2.16969310
  0.14160000   2.16969222
  0.14160000   2.16969140
  0.14160000   2.16969063
  0.14160000   2.16968991
  0.14160000   2.16968923
  0.14160000   2.16968860
  0.14160000   2.16968800
  0.14160000   2.16968743
  0.14160000   2.16968689
  0.14160000   2.16968638
  0.14180000   2.17100721
  0.14180000   2.17100451
  0.14180000   2.17100212
  0.14180000   2.17099999
  0.14180000   2.17099809
  0.14180000   2.17099637
  0.14180000   2.17099481
  0.14180000   2.17099340
  0.14180000   2.17099210
  0.14180000   2.17099091
  0.14180000   2.17098981
  0.14180000   2.17098879
  0.14180000   2.17098784
  0.14180000   2.17098696
  0.14180000   2.17098614
  0.14180000   2.17098538
  0.14180000   2.17098466
  0.14180000   2.17098398
  0.14180000   2.17098334
  0.14180000   2.17098274
  0.14180000   2.17098217
  0.14180000   2.17098164
  0.14180000   2.17098113
  0.14200000   2.17229032
  0.14200000   2.17228762
  0.14200000   2.17228524
  0.14200000   2.17228312
  0.14200000   2.17228122
  0.14200000   2.17227951
  0.14200000   2.17227796
  0.14200000   2.17227654
  0.14200000   2.17227524
  0.14200000   2.17227405
  0.14200000   2.17227295
  0.14200000   2.17227194
  0.14200000   2.17227099
  0.14200000   2.17227011
  0.14200000   2.17226929
  0.14200000   2.17226852
  0.14200000   2.17226780
  0.14200000   2.17226713
  0.14200000   2.17226649
  0.14200000   2.17226589
  0.14200000   2.17226532
  0.14200000   2.17226478
  0.14200000   2.17226428
  0.14220000   2.17356199
  0.14220000   2.17355931
  0.14220000   2.17355693
  0.14220000   2.17355482
  0.14220000   2.17355293
  0.14220000   2.17355122
  0.14220000   2.17354967
  0.14220000   2.17354825
  0.14220000   2.17354696
  0.14220000   2.17354577
  0.14220000   2.17354467
  0.14220000   2.17354365
  0.14220000   2.17354271
  0.14220000   2.17354183
  0.14220000   2.17354101
  0.14220000   2.17354024
  0.14220000   2.17353952
  0.14220000   2.17353885
  0.14220000   2.17353821
  0.14220000   2.17353761
  0.14220000   2.17353704
  0.14220000   2.17353650
  0.14220000   2.17353599
  0.14240000   2.17482239
  0.14240000   2.17481972
  0.14240000   2.17481736
  0.14240000   2.17481525
  0.14240000   2.17481336
  0.14240000   2.17481166
  0.14240000   2.17481011
  0.14240000   2.17480870
  0.14240000   2.17480740
  0.14240000   2.17480621
  0.14240000   2.17480512
  0.14240000   2.17480410
  0.14240000   2.17480316
  0.14240000   2.17480228
  0.14240000   2.17480146
  0.14240000   2.17480069
  0.14240000   2.17479997
  0.14240000   2.17479929
  0.14240000   2.17479865
  0.14240000   2.17479805
  0.14240000   2.17479748
  0.14240000   2.17479695
  0.14240000   2.17479644
  0.14260000   2.17607168
  0.14260000   2.17606902
  0.14260000   2.17606667
  0.14260000   2.17606457
  0.14260000   2.17606268
  0.14260000   2.17606098
  0.14260000   2.17605944
  0.14260000   2.17605803
  0.14260000   2.17605673
  0.14260000   2.17605555
  0.14260000   2.17605445
  0.14260000   2.17605343
  0.14260000   2.17605249
  0.14260000   2.17605161
  0.14260000   2.17605079
  0.14260000   2.17605002
  0.14260000   2.17604930
  0.14260000   2.17604863
  0.14260000   2.17604799
  0.14260000   2.17604739
  0.14260000   2.17604682
  0.14260000   2.17604628
  0.14260000   2.17604577
  0.14280000   2.17731002
  0.14280000   2.17730737
  0.14280000   2.17730502
  0.14280000   2.17730293
  0.14280000   2.17730105
  0.14280000   2.17729935
  0.14280000   2.17729781
  0.14280000   2.17729640
  0.14280000   2.17729511
  0.14280000   2.17729392
  0.14280000   2.17729282
  0.14280000   2.17729181
  0.14280000   2.17729087
  0.14280000   2.17728999
  0.14280000   2.17728917
  0.14280000   2.17728840
  0.14280000   2.17728768
  0.14280000   2.17728700
  0.14280000   2.17728636
  0.14280000   2.17728576
  0.14280000   2.17728519
  0.14280000   2.17728465
  0.14280000   2.17728414
  0.14300000   2.17853755
  0.14300000   2.17853491
  0.14300000   2.17853257
  0.14300000   2.17853048
  0.14300000   2.17852860
  0.14300000   2.17852691
  0.14300000   2.17852537
  0.14300000   2.17852396
  0.14300000   2.17852267
  0.14300000   2.17852149
  0.14300000   2.17852039
  0.14300000   2.17851938
  0.14300000   2.17851843
  0.14300000   2.17851756
  0.14300000   2.17851674
  0.14300000   2.17851597
  0.14300000   2.17851525
  0.14300000   2.17851457
  0.14300000   2.17851393
  0.14300000   2.17851333
  0.14300000   2.17851276
  0.14300000   2.17851222
  0.14300000   2.17851171
  0.14320000   2.17975442
  0.14320000   2.17975179
  0.14320000   2.17974946
  0.14320000   2.17974738
  0.14320000   2.17974550
  0.14320000   2.17974381
  0.14320000   2.17974227
  0.14320000   2.17974087
  0.14320000   2.17973958
  0.14320000   2.17973840
  0.14320000   2.17973730
  0.14320000   2.17973629
  0.14320000   2.17973534
  0.14320000   2.17973447
  0.14320000   2.17973365
  0.14320000   2.17973288
  0.14320000   2.17973216
  0.14320000   2.17973148
  0.14320000   2.17973084
  0.14320000   2.17973024
  0.14320000   2.17972966
  0.14320000   2.17972912
  0.14320000   2.17972861
  0.14340000   2.18096078
  0.14340000   2.18095816
  0.14340000   2.18095584
  0.14340000   2.18095376
  0.14340000   2.18095189
  0.14340000   2.18095020
  0.14340000   2.18094866
  0.14340000   2.18094726
  0.14340000   2.18094598
  0.14340000   2.18094479
  0.14340000   2.18094370
  0.14340000   2.18094268
  0.14340000   2.18094174
  0.14340000   2.18094086
  0.14340000   2.18094004
  0.14340000   2.18093927
  0.14340000   2.18093855
  0.14340000   2.18093787
  0.14340000   2.18093723
  0.14340000   2.18093663
  0.14340000   2.18093606
  0.14340000   2.18093552
  0.14340000   2.18093501
  0.14360000   2.18215678
  0.14360000   2.18215416
  0.14360000   2.18215184
  0.14360000   2.18214977
  0.14360000   2.18214791
  0.14360000   2.18214622
  0.14360000   2.18214469
  0.14360000   2.18214329
  0.14360000   2.18214200
  0.14360000   2.18214082
  0.14360000   2.18213972
  0.14360000   2.18213871
  0.14360000   2.18213777
  0.14360000   2.18213689
  0.14360000   2.18213607
  0.14360000   2.18213530
  0.14360000   2.18213458
  0.14360000   2.18213390
  0.14360000   2.18213326
  0.14360000   2.18213265
  0.14360000   2.18213208
  0.14360000   2.18213154
  0.14360000   2.18213103
  0.14380000   2.18334254
  0.14380000   2.18333994
  0.14380000   2.18333762
  0.14380000   2.18333556
  0.14380000   2.18333369
  0.14380000   2.18333201
  0.14380000   2.18333048
  0.14380000   2.18332908
  0.14380000   2.18332780
  0.14380000   2.18332661
  0.14380000   2.18332552
  0.14380000   2.18332451
  0.14380000   2.18332356
  0.14380000   2.18332269
  0.14380000   2.18332186
  0.14380000   2.18332110
  0.14380000   2.18332037
  0.14380000   2.18331969
  0.14380000   2.18331905
  0.14380000   2.18331845
  0.14380000   2.18331788
  0.14380000   2.18331734
  0.14380000   2.18331682
  0.14400000   2.18451821
  0.14400000   2.18451562
  0.14400000   2.18451331
  0.14400000   2.18451125
  0.14400000   2.18450939
  0.14400000   2.18450771
  0.14400000   2.18450618
  0.14400000   2.18450478
  0.14400000   2.18450350
  0.14400000   2.18450232
  0.14400000   2.18450122
  0.14400000   2.18450021
  0.14400000   2.18449927
  0.14400000   2.18449839
  0.14400000   2.18449757
  0.14400000   2.18449680
  0.14400000   2.18449608
  0.14400000   2.18449540
  0.14400000   2.18449476
  0.14400000   2.18449415
  0.14400000   2.18449358
  0.14400000   2.18449304
  0.14400000   2.18449252
  0.14420000   2.18568393
  0.14420000   2.18568134
  0.14420000   2.18567904
  0.14420000   2.18567698
  0.14420000   2.18567513
  0.14420000   2.18567345
  0.14420000   2.18567192
  0.14420000   2.18567053
  0.14420000   2.18566924
  0.14420000   2.18566806
  0.14420000   2.18566697
  0.14420000   2.18566596
  0.14420000   2.18566501
  0.14420000   2.18566414
  0.14420000   2.18566331
  0.14420000   2.18566254
  0.14420000   2.18566182
  0.14420000   2.18566114
  0.14420000   2.18566050
  0.14420000   2.18565990
  0.14420000   2.18565932
  0.14420000   2.18565878
  0.14420000   2.18565826
  0.14440000   2.18683982
  0.14440000   2.18683724
  0.14440000   2.18683495
  0.14440000   2.18683289
  0.14440000   2.18683104
  0.14440000   2.18682937
  0.14440000   2.18682784
  0.14440000   2.18682644
  0.14440000   2.18682516
  0.14440000   2.18682398
  0.14440000   2.18682289
  0.14440000   2.18682188
  0.14440000   2.18682094
  0.14440000   2.18682006
  0.14440000   2.18681923
  0.14440000   2.18681846
  0.14440000   2.18681774
  0.14440000   2.18681706
  0.14440000   2.18681642
  0.14440000   2.18681581
  0.14440000   2.18681524
  0.14440000   2.18681470
  0.14440000   2.18681418
  0.14460000   2.18798602
  0.14460000   2.18798345
  0.14460000   2.18798116
  0.14460000   2.18797911
  0.14460000   2.18797726
  0.14460000   2.18797559
  0.14460000   2.18797406
  0.14460000   2.18797267
  0.14460000   2.18797139
  0.14460000   2.18797021
  0.14460000   2.18796912
  0.14460000   2.18796810
  0.14460000   2.18796716
  0.14460000   2.18796628
  0.14460000   2.18796546
  0.14460000   2.18796469
  0.14460000   2.18796397
  0.14460000   2.18796328
  0.14460000   2.18796264
  0.14460000   2.18796204
  0.14460000   2.18796146
  0.14460000   2.18796092
  0.14460000   2.18796040
  0.14480000   2.18912265
  0.14480000   2.18912008
  0.14480000   2.18911780
  0.14480000   2.18911575
  0.14480000   2.18911391
  0.14480000   2.18911224
  0.14480000   2.18911072
  0.14480000   2.18910932
  0.14480000   2.18910804
  0.14480000   2.18910686
  0.14480000   2.18910577
  0.14480000   2.18910476
  0.14480000   2.18910382
  0.14480000   2.18910294
  0.14480000   2.18910212
  0.14480000   2.18910134
  0.14480000   2.18910062
  0.14480000   2.18909994
  0.14480000   2.18909930
  0.14480000   2.18909869
  0.14480000   2.18909812
  0.14480000   2.18909757
  0.14480000   2.18909705
  0.14500000   2.19024984
  0.14500000   2.19024728
  0.14500000   2.19024500
  0.14500000   2.19024296
  0.14500000   2.19024112
  0.14500000   2.19023945
  0.14500000   2.19023793
  0.14500000   2.19023653
  0.14500000   2.19023526
  0.14500000   2.19023408
  0.14500000   2.19023298
  0.14500000   2.19023197
  0.14500000   2.19023103
  0.14500000   2.19023015
  0.14500000   2.19022933
  0.14500000   2.19022856
  0.14500000   2.19022783
  0.14500000   2.19022715
  0.14500000   2.19022651
  0.14500000   2.19022590
  0.14500000   2.19022533
  0.14500000   2.19022478
  0.14500000   2.19022426
  0.14520000   2.19136771
  0.14520000   2.19136515
  0.14520000   2.19136288
  0.14520000   2.19136084
  0.14520000   2.19135900
  0.14520000   2.19135734
  0.14520000   2.19135582
  0.14520000   2.19135443
  0.14520000   2.19135315
  0.14520000   2.19135197
  0.14520000   2.19135088
  0.14520000   2.19134987
  0.14520000   2.19134892
  0.14520000   2.19134804
  0.14520000   2.19134722
  0.14520000   2.19134645
  0.14520000   2.19134572
  0.14520000   2.19134504
  0.14520000   2.19134440
  0.14520000   2.19134379
  0.14520000   2.19134321
  0.14520000   2.19134267
  0.14520000   2.19134215
  0.14540000   2.19247638
  0.14540000   2.19247383
  0.14540000   2.19247156
  0.14540000   2.19246953
  0.14540000   2.19246769
  0.14540000   2.19246603
  0.14540000   2.19246451
  0.14540000   2.19246312
  0.14540000   2.19246184
  0.14540000   2.19246066
  0.14540000   2.19245957
  0.14540000   2.19245856
  0.14540000   2.19245761
  0.14540000   2.19245673
  0.14540000   2.19245591
  0.14540000   2.19245514
  0.14540000   2.19245441
  0.14540000   2.19245373
  0.14540000   2.19245309
  0.14540000   2.19245248
  0.14540000   2.19245190
  0.14540000   2.19245136
  0.14540000   2.19245084
  0.14560000   2.19357597
  0.14560000   2.19357342
  0.14560000   2.19357116
  0.14560000   2.19356913
  0.14560000   2.19356730
  0.14560000   2.19356563
  0.14560000   2.19356412
  0.14560000   2.19356273
  0.14560000   2.19356145
  0.14560000   2.19356027
  0.14560000   2.19355918
  0.14560000   2.19355817
  0.14560000   2.19355722
  0.14560000   2.19355634
  0.14560000   2.19355552
  0.14560000   2.19355475
  0.14560000   2.19355402
  0.14560000   2.19355334
  0.14560000   2.19355270
  0.14560000   2.19355209
  0.14560000   2.19355151
  0.14560000   2.19355096
  0.14560000   2.19355044
  0.14580000   2.19466659
  0.14580000   2.19466405
  0.14580000   2.19466180
  0.14580000   2.19465977
  0.14580000   2.19465794
  0.14580000   2.19465627
  0.14580000   2.19465476
  0.14580000   2.19465337
  0.14580000   2.19465209
  0.14580000   2.19465092
  0.14580000   2.19464982
  0.14580000   2.19464881
  0.14580000   2.19464787
  0.14580000   2.19464699
  0.14580000   2.19464617
  0.14580000   2.19464539
  0.14580000   2.19464467
  0.14580000   2.19464398
  0.14580000   2.19464334
  0.14580000   2.19464273
  0.14580000   2.19464215
  0.14580000   2.19464160
  0.14580000   2.19464108
  0.14600000   2.19574836
  0.14600000   2.19574583
  0.14600000   2.19574358
  0.14600000   2.19574155
  0.14600000   2.19573972
  0.14600000   2.19573806
  0.14600000   2.19573655
  0.14600000   2.19573516
  0.14600000   2.19573389
  0.14600000   2.19573271
  0.14600000   2.19573162
  0.14600000   2.19573061
  0.14600000   2.19572966
  0.14600000   2.19572878
  0.14600000   2.19572796
  0.14600000   2.19572718
  0.14600000   2.19572646
  0.14600000   2.19572577
  0.14600000   2.19572513
  0.14600000   2.19572452
  0.14600000   2.19572394
  0.14600000   2.19572339
  0.14600000   2.19572287
  0.14620000   2.19682140
  0.14620000   2.19681887
  0.14620000   2.19681662
  0.14620000   2.19681460
  0.14620000   2.19681277
  0.14620000   2.19681111
  0.14620000   2.19680960
  0.14620000   2.19680821
  0.14620000   2.19680694
  0.14620000   2.19680576
  0.14620000   2.19680467
  0.14620000   2.19680366
  0.14620000   2.19680271
  0.14620000   2.19680183
  0.14620000   2.19680101
  0.14620000   2.19680023
  0.14620000   2.19679951
  0.14620000   2.19679882
  0.14620000   2.19679818
  0.14620000   2.19679757
  0.14620000   2.19679699
  0.14620000   2.19679644
  0.14620000   2.19679592
  0.14640000   2.19788580
  0.14640000   2.19788328
  0.14640000   2.19788104
  0.14640000   2.19787902
  0.14640000   2.19787719
  0.14640000   2.19787554
  0.14640000   2.19787402
  0.14640000   2.19787264
  0.14640000   2.19787136
  0.14640000   2.19787018
  0.14640000   2.19786909
  0.14640000   2.19786808
  0.14640000   2.19786714
  0.14640000   2.19786626
  0.14640000   2.19786543
  0.14640000   2.19786466
  0.14640000   2.19786393
  0.14640000   2.19786324
  0.14640000   2.19786260
  0.14640000   2.19786199
  0.14640000   2.19786141
  0.14640000   2.19786086
  0.14640000   2.19786034
  0.14660000   2.19894168
  0.14660000   2.19893917
  0.14660000   2.19893693
  0.14660000   2.19893491
  0.14660000   2.19893309
  0.14660000   2.19893143
  0.14660000   2.19892992
  0.14660000   2.19892854
  0.14660000   2.19892726
  0.14660000   2.19892609
  0.14660000   2.19892500
  0.14660000   2.19892398
  0.14660000   2.19892304
  0.14660000   2.19892216
  0.14660000   2.19892133
  0.14660000   2.19892056
  0.14660000   2.19891983
  0.14660000   2.19891914
  0.14660000   2.19891849
  0.14660000   2.19891788
  0.14660000   2.19891730
  0.14660000   2.19891675
  0.14660000   2.19891623
  0.14680000   2.19998915
  0.14680000   2.19998665
  0.14680000   2.19998441
  0.14680000   2.19998239
  0.14680000   2.19998057
  0.14680000   2.19997892
  0.14680000   2.19997741
  0.14680000   2.19997602
  0.14680000   2.19997475
  0.14680000   2.19997357
  0.14680000   2.19997248
  0.14680000   2.19997147
  0.14680000   2.19997052
  0.14680000   2.19996964
  0.14680000   2.19996882
  0.14680000   2.19996804
  0.14680000   2.19996731
  0.14680000   2.19996662
  0.14680000   2.19996598
  0.14680000   2.19996536
  0.14680000   2.19996478
  0.14680000   2.19996423
  0.14680000   2.19996371
  0.14700000   2.20102831
  0.14700000   2.20102581
  0.14700000   2.20102357
  0.14700000   2.20102156
  0.14700000   2.20101974
  0.14700000   2.20101809
  0.14700000   2.20101658
  0.14700000   2.20101520
  0.14700000   2.20101392
  0.14700000   2.20101275
  0.14700000   2.20101165
  0.14700000   2.20101064
  0.14700000   2.20100970
  0.14700000   2.20100881
  0.14700000   2.20100799
  0.14700000   2.20100721
  0.14700000   2.20100648
  0.14700000   2.20100580
  0.14700000   2.20100515
  0.14700000   2.20100453
  0.14700000   2.20100395
  0.14700000   2.20100340
  0.14700000   2.20100288
  0.14720000   2.20205926
  0.14720000   2.20205676
  0.14720000   2.20205453
  0.14720000   2.20205252
  0.14720000   2.20205071
  0.14720000   2.20204905
  0.14720000   2.20204755
  0.14720000   2.20204616
  0.14720000   2.20204489
  0.14720000   2.20204371
  0.14720000   2.20204262
  0.14720000   2.20204161
  0.14720000   2.20204066
  0.14720000   2.20203978
  0.14720000   2.20203895
  0.14720000   2.20203818
  0.14720000   2.20203745
  0.14720000   2.20203676
  0.14720000   2.20203611
  0.14720000   2.20203549
  0.14720000   2.20203491
  0.14720000   2.20203436
  0.14720000   2.20203384
  0.14740000   2.20308210
  0.14740000   2.20307961
  0.14740000   2.20307738
  0.14740000   2.20307538
  0.14740000   2.20307356
  0.14740000   2.20307191
  0.14740000   2.20307040
  0.14740000   2.20306902
  0.14740000   2.20306775
  0.14740000   2.20306657
  0.14740000   2.20306548
  0.14740000   2.20306446
  0.14740000   2.20306352
  0.14740000   2.20306263
  0.14740000   2.20306181
  0.14740000   2.20306103
  0.14740000   2.20306030
  0.14740000   2.20305961
  0.14740000   2.20305896
  0.14740000   2.20305835
  0.14740000   2.20305777
  0.14740000   2.20305721
  0.14740000   2.20305669
  0.14760000   2.20409694
  0.14760000   2.20409445
  0.14760000   2.20409222
  0.14760000   2.20409022
  0.14760000   2.20408841
  0.14760000   2.20408676
  0.14760000   2.20408525
  0.14760000   2.20408387
  0.14760000   2.20408259
  0.14760000   2.20408142
  0.14760000   2.20408033
  0.14760000   2.20407931
  0.14760000   2.20407836
  0.14760000   2.20407748
  0.14760000   2.20407665
  0.14760000   2.20407588
  0.14760000   2.20407514
  0.14760000   2.20407446
  0.14760000   2.20407380
  0.14760000   2.20407319
  0.14760000   2.20407261
  0.14760000   2.20407205
  0.14760000   2.20407153
  0.14780000   2.20510386
  0.14780000   2.20510138
  0.14780000   2.20509915
  0.14780000   2.20509715
  0.14780000   2.20509534
  0.14780000   2.20509369
  0.14780000   2.20509218
  0.14780000   2.20509080
  0.14780000   2.20508953
  0.14780000   2.20508835
  0.14780000   2.20508726
  0.14780000   2.20508624
  0.14780000   2.20508530
  0.14780000   2.20508441
  0.14780000   2.20508359
  0.14780000   2.20508281
  0.14780000   2.20508208
  0.14780000   2.20508139
  0.14780000   2.20508074
  0.14780000   2.20508012
  0.14780000   2.20507954
  0.14780000   2.20507898
  0.14780000   2.20507846
  0.14800000   2.20610297
  0.14800000   2.20610049
  0.14800000   2.20609827
  0.14800000   2.20609627
  0.14800000   2.20609446
  0.14800000   2.20609281
  0.14800000   2.20609130
  0.14800000   2.20608992
  0.14800000   2.20608865
  0.14800000   2.20608747
  0.14800000   2.20608638
  0.14800000   2.20608536
  0.14800000   2.20608442
  0.14800000   2.20608353
  0.14800000   2.20608270
  0.14800000   2.20608192
  0.14800000   2.20608119
  0.14800000   2.20608050
  0.14800000   2.20607985
  0.14800000   2.20607923
  0.14800000   2.20607865
  0.14800000   2.20607810
  0.14800000   2.20607757
  0.14820000   2.20709435
  0.14820000   2.20709187
  0.14820000   2.20708966
  0.14820000   2.20708766
  0.14820000   2.20708585
  0.14820000   2.20708421
  0.14820000   2.20708270
  0.14820000   2.20708132
  0.14820000   2.20708004
  0.14820000   2.20707887
  0.14820000   2.20707777
  0.14820000   2.20707676
  0.14820000   2.20707581
  0.14820000   2.20707493
  0.14820000   2.20707410
  0.14820000   2.20707332
  0.14820000   2.20707258
  0.14820000   2.20707189
  0.14820000   2.20707124
  0.14820000   2.20707062
  0.14820000   2.20707004
  0.14820000   2.20706949
  0.14820000   2.20706896
  0.14840000   2.20807810
  0.14840000   2.20807563
  0.14840000   2.20807342
  0.14840000   2.20807142
  0.14840000   2.20806962
  0.14840000   2.20806797
  0.14840000   2.20806647
  0.14840000   2.20806508
  0.14840000   2.20806381
  0.14840000   2.20806263
  0.14840000   2.20806154
  0.14840000   2.20806052
  0.14840000   2.20805958
  0.14840000   2.20805869
  0.14840000   2.20805786
  0.14840000   2.20805708
  0.14840000   2.20805635
  0.14840000   2.20805566
  0.14840000   2.20805500
  0.14840000   2.20805438
  0.14840000   2.20805380
  0.14840000   2.20805324
  0.14840000   2.20805272
  0.14860000   2.20905432
  0.14860000   2.20905185
  0.14860000   2.20904964
  0.14860000   2.20904765
  0.14860000   2.20904584
  0.14860000   2.20904420
  0.14860000   2.20904269
  0.14860000   2.20904131
  0.14860000   2.20904004
  0.14860000   2.20903886
  0.14860000   2.20903777
  0.14860000   2.20903675
  0.14860000   2.20903580
  0.14860000   2.20903492
  0.14860000   2.20903408
  0.14860000   2.20903330
  0.14860000   2.20903257
  0.14860000   2.20903188
  0.14860000   2.20903122
  0.14860000   2.20903061
  0.14860000   2.20903002
  0.14860000   2.20902946
  0.14860000   2.20902894
  0.14880000   2.21002309
  0.14880000   2.21002062
  0.14880000   2.21001841
  0.14880000   2.21001642
  0.14880000   2.21001462
  0.14880000   2.21001297
  0.14880000   2.21001147
  0.14880000   2.21001009
  0.14880000   2.21000881
  0.14880000   2.21000763
  0.14880000   2.21000654
  0.14880000   2.21000552
  0.14880000   2.21000458
  0.14880000   2.21000369
  0.14880000   2.21000286
  0.14880000   2.21000208
  0.14880000   2.21000134
  0.14880000   2.21000065
  0.14880000   2.21000000
  0.14880000   2.20999938
  0.14880000   2.20999879
  0.14880000   2.20999823
  0.14880000   2.20999770
  0.14900000   2.21098449
  0.14900000   2.21098203
  0.14900000   2.21097982
  0.14900000   2.21097783
  0.14900000   2.21097603
  0.14900000   2.21097439
  0.14900000   2.21097288
  0.14900000   2.21097150
  0.14900000   2.21097023
  0.14900000   2.21096905
  0.14900000   2.21096796
  0.14900000   2.21096694
  0.14900000   2.21096599
  0.14900000   2.21096510
  0.14900000   2.21096427
  0.14900000   2.21096349
  0.14900000   2.21096275
  0.14900000   2.21096206
  0.14900000   2.21096140
  0.14900000   2.21096078
  0.14900000   2.21096020
  0.14900000   2.21095964
  0.14900000   2.21095911
  0.14920000   2.21193862
  0.14920000   2.21193616
  0.14920000   2.21193396
  0.14920000   2.21193197
  0.14920000   2.21193017
  0.14920000   2.21192852
  0.14920000   2.21192702
  0.14920000   2.21192564
  0.14920000   2.21192436
  0.14920000   2.21192319
  0.14920000   2.21192209
  0.14920000   2.21192107
  0.14920000   2.21192013
  0.14920000   2.21191924
  0.14920000   2.21191840
  0.14920000   2.21191762
  0.14920000   2.21191689
  0.14920000   2.21191619
  0.14920000   2.21191554
  0.14920000   2.21191492
  0.14920000   2.21191433
  0.14920000   2.21191377
  0.14920000   2.21191324
  0.14940000   2.21288556
  0.14940000   2.21288310
  0.14940000   2.21288090
  0.14940000   2.21287891
  0.14940000   2.21287711
  0.14940000   2.21287547
  0.14940000   2.21287397
  0.14940000   2.21287258
  0.14940000   2.21287131
  0.14940000   2.21287013
  0.14940000   2.21286904
  0.14940000   2.21286802
  0.14940000   2.21286707
  0.14940000   2.21286618
  0.14940000   2.21286535
  0.14940000   2.21286457
  0.14940000   2.21286383
  0.14940000   2.21286313
  0.14940000   2.21286248
  0.14940000   2.21286186
  0.14940000   2.21286127
  0.14940000   2.21286071
  0.14940000   2.21286018
  0.14960000   2.21382539
  0.14960000   2.21382293
  0.14960000   2.21382073
  0.14960000   2.21381875
  0.14960000   2.21381695
  0.14960000   2.21381531
  0.14960000   2.21381381
  0.14960000   2.21381242
  0.14960000   2.21381115
  0.14960000   2.21380997
  0.14960000   2.21380888
  0.14960000   2.21380786
  0.14960000   2.21380691
  0.14960000   2.21380602
  0.14960000   2.21380518
  0.14960000   2.21380440
  0.14960000   2.21380366
  0.14960000   2.21380297
  0.14960000   2.21380231
  0.14960000   2.21380169
  0.14960000   2.21380110
  0.14960000   2.21380054
  0.14960000   2.21380001
  0.14980000   2.21475819
  0.14980000   2.21475574
  0.14980000   2.21475355
  0.14980000   2.21475156
  0.14980000   2.21474976
  0.14980000   2.21474812
  0.14980000   2.21474662
  0.14980000   2.21474524
  0.14980000   2.21474396
  0.14980000   2.21474278
  0.14980000   2.21474169
  0.14980000   2.21474067
  0.14980000   2.21473972
  0.14980000   2.21473883
  0.14980000   2.21473799
  0.14980000   2.21473721
  0.14980000   2.21473647
  0.14980000   2.21473578
  0.14980000   2.21473512
  0.14980000   2.21473450
  0.14980000   2.21473391
  0.14980000   2.21473335
  0.14980000   2.21473281
  0.15000000   2.21568405
  0.15000000   2.21568161
  0.15000000   2.21567941
  0.15000000   2.21567743
  0.15000000   2.21567563
  0.15000000   2.21567399
  0.15000000   2.21567249
  0.15000000   2.21567111
  0.15000000   2.21566983
  0.15000000   2.21566865
  0.15000000   2.21566756
  0.15000000   2.21566654
  0.15000000   2.21566559
  0.15000000   2.21566470
  0.15000000   2.21566386
  0.15000000   2.21566307
  0.15000000   2.21566234
  0.15000000   2.21566164
  0.15000000   2.21566098
  0.15000000   2.21566036
  0.15000000   2.21565977
  0.15000000   2.21565921
  0.15000000   2.21565867
  0.15020000   2.21660305
  0.15020000   2.21660061
  0.15020000   2.21659841
  0.15020000   2.21659643
  0.15020000   2.21659463
  0.15020000   2.21659299
  0.15020000   2.21659149
  0.15020000   2.21659011
  0.15020000   2.21658884
  0.15020000   2.21658766
  0.15020000   2.21658656
  0.15020000   2.21658554
  0.15020000   2.21658459
  0.15020000   2.21658370
  0.15020000   2.21658286
  0.15020000   2.21658207
  0.15020000   2.21658134
  0.15020000   2.21658064
  0.15020000   2.21657998
  0.15020000   2.21657935
  0.15020000   2.21657876
  0.15020000   2.21657820
  0.15020000   2.21657767
  0.15040000   2.21751526
  0.15040000   2.21751282
  0.15040000   2.21751063
  0.15040000   2.21750865
  0.15040000   2.21750685
  0.15040000   2.21750521
  0.15040000   2.21750371
  0.15040000   2.21750233
  0.15040000   2.21750105
  0.15040000   2.21749987
  0.15040000   2.21749878
  0.15040000   2.21749775
  0.15040000   2.21749680
  0.15040000   2.21749591
  0.15040000   2.21749507
  0.15040000   2.21749429
  0.15040000   2.21749355
  0.15040000   2.21749285
  0.15040000   2.21749219
  0.15040000   2.21749156
  0.15040000   2.21749097
  0.15040000   2.21749041
  0.15040000   2.21748987
  0.15060000   2.21842076
  0.15060000   2.21841832
  0.15060000   2.21841613
  0.15060000   2.21841415
  0.15060000   2.21841236
  0.15060000   2.21841072
  0.15060000   2.21840922
  0.15060000   2.21840783
  0.15060000   2.21840656
  0.15060000   2.21840538
  0.15060000   2.21840428
  0.15060000   2.21840326
  0.15060000   2.21840231
  0.15060000   2.21840141
  0.15060000   2.21840058
  0.15060000   2.21839979
  0.15060000   2.21839905
  0.15060000   2.21839835
  0.15060000   2.21839769
  0.15060000   2.21839706
  0.15060000   2.21839647
  0.15060000   2.21839591
  0.15060000   2.21839537
  0.15080000   2.21931963
  0.15080000   2.21931719
  0.15080000   2.21931500
  0.15080000   2.21931303
  0.15080000   2.21931123
  0.15080000   2.21930959
  0.15080000   2.21930809
  0.15080000   2.21930671
  0.15080000   2.21930543
  0.15080000   2.21930425
  0.15080000   2.21930315
  0.15080000   2.21930213
  0.15080000   2.21930118
  0.15080000   2.21930028
  0.15080000   2.21929945
  0.15080000   2.21929866
  0.15080000   2.21929792
  0.15080000   2.21929722
  0.15080000   2.21929655
  0.15080000   2.21929593
  0.15080000   2.21929533
  0.15080000   2.21929477
  0.15080000   2.21929424
  0.15100000   2.22021193
  0.15100000   2.22020950
  0.15100000   2.22020731
  0.15100000   2.22020534
  0.15100000   2.22020354
  0.15100000   2.22020190
  0.15100000   2.22020040
  0.15100000   2.22019902
  0.15100000   2.22019774
  0.15100000   2.22019656
  0.15100000   2.22019546
  0.15100000   2.22019444
  0.15100000   2.22019349
  0.15100000   2.22019259
  0.15100000   2.22019175
  0.15100000   2.22019097
  0.15100000   2.22019022
  0.15100000   2.22018952
  0.15100000   2.22018886
  0.15100000   2.22018823
  0.15100000   2.22018764
  0.15100000   2.22018708
  0.15100000   2.22018654
  0.15120000   2.22109775
  0.15120000   2.22109532
  0.15120000   2.22109314
  0.15120000   2.22109116
  0.15120000   2.22108937
  0.15120000   2.22108773
  0.15120000   2.22108623
  0.15120000   2.22108485
  0.15120000   2.22108357
  0.15120000   2.22108239
  0.15120000   2.22108129
  0.15120000   2.22108027
  0.15120000   2.22107931
  0.15120000   2.22107842
  0.15120000   2.22107758
  0.15120000   2.22107679
  0.15120000   2.22107605
  0.15120000   2.22107534
  0.15120000   2.22107468
  0.15120000   2.22107405
  0.15120000   2.22107346
  0.15120000   2.22107289
  0.15120000   2.22107236
  0.15140000   2.22197716
  0.15140000   2.22197473
  0.15140000   2.22197255
  0.15140000   2.22197058
  0.15140000   2.22196878
  0.15140000   2.22196714
  0.15140000   2.22196564
  0.15140000   2.22196426
  0.15140000   2.22196298
  0.15140000   2.22196180
  0.15140000   2.22196070
  0.15140000   2.22195968
  0.15140000   2.22195872
  0.15140000   2.22195783
  0.15140000   2.22195699
  0.15140000   2.22195620
  0.15140000   2.22195545
  0.15140000   2.22195475
  0.15140000   2.22195409
  0.15140000   2.22195346
  0.15140000   2.22195286
  0.15140000   2.22195230
  0.15140000   2.22195176
  0.15160000   2.22285023
  0.15160000   2.22284780
  0.15160000   2.22284562
  0.15160000   2.22284365
  0.15160000   2.22284185
  0.15160000   2.22284021
  0.15160000   2.22283871
  0.15160000   2.22283733
  0.15160000   2.22283605
  0.15160000   2.22283487
  0.15160000   2.22283377
  0.15160000   2.22283275
  0.15160000   2.22283179
  0.15160000   2.22283089
  0.15160000   2.22283005
  0.15160000   2.22282926
  0.15160000   2.22282852
  0.15160000   2.22282781
  0.15160000   2.22282715
  0.15160000   2.22282652
  0.15160000   2.22282592
  0.15160000   2.22282536
  0.15160000   2.22282482
  0.15180000   2.22371702
  0.15180000   2.22371460
  0.15180000   2.22371242
  0.15180000   2.22371044
  0.15180000   2.22370865
  0.15180000   2.22370701
  0.15180000   2.22370551
  0.15180000   2.22370413
  0.15180000   2.22370285
  0.15180000   2.22370167
  0.15180000   2.22370057
  0.15180000   2.22369954
  0.15180000   2.22369858
  0.15180000   2.22369769
  0.15180000   2.22369684
  0.15180000   2.22369605
  0.15180000   2.22369531
  0.15180000   2.22369460
  0.15180000   2.22369394
  0.15180000   2.22369331
  0.15180000   2.22369271
  0.15180000   2.22369214
  0.15180000   2.22369161
  0.15200000   2.22457761
  0.15200000   2.22457519
  0.15200000   2.22457301
  0.15200000   2.22457104
  0.15200000   2.22456924
  0.15200000   2.22456761
  0.15200000   2.22456610
  0.15200000   2.22456472
  0.15200000   2.22456344
  0.15200000   2.22456226
  0.15200000   2.22456116
  0.15200000   2.22456013
  0.15200000   2.22455917
  0.15200000   2.22455827
  0.15200000   2.22455743
  0.15200000   2.22455664
  0.15200000   2.22455589
  0.15200000   2.22455519
  0.15200000   2.22455452
  0.15200000   2.22455389
  0.15200000   2.22455330
  0.15200000   2.22455273
  0.15200000   2.22455219
  0.15220000   2.22543206
  0.15220000   2.22542964
  0.15220000   2.22542746
  0.15220000   2.22542549
  0.15220000   2.22542370
  0.15220000   2.22542206
  0.15220000   2.22542056
  0.15220000   2.22541918
  0.15220000   2.22541790
  0.15220000   2.22541671
  0.15220000   2.22541561
  0.15220000   2.22541459
  0.15220000   2.22541363
  0.15220000   2.22541273
  0.15220000   2.22541189
  0.15220000   2.22541109
  0.15220000   2.22541035
  0.15220000   2.22540964
  0.15220000   2.22540897
  0.15220000   2.22540834
  0.15220000   2.22540774
  0.15220000   2.22540718
  0.15220000   2.22540663
  0.15240000   2.22628045
  0.15240000   2.22627803
  0.15240000   2.22627585
  0.15240000   2.22627388
  0.15240000   2.22627209
  0.15240000   2.22627045
  0.15240000   2.22626895
  0.15240000   2.22626756
  0.15240000   2.22626629
  0.15240000   2.22626510
  0.15240000   2.22626400
  0.15240000   2.22626297
  0.15240000   2.22626201
  0.15240000   2.22626111
  0.15240000   2.22626027
  0.15240000   2.22625948
  0.15240000   2.22625873
  0.15240000   2.22625802
  0.15240000   2.22625735
  0.15240000   2.22625672
  0.15240000   2.22625612
  0.15240000   2.22625555
  0.15240000   2.22625501
  0.15260000   2.22712283
  0.15260000   2.22712041
  0.15260000   2.22711824
  0.15260000   2.22711627
  0.15260000   2.22711447
  0.15260000   2.22711284
  0.15260000   2.22711133
  0.15260000   2.22710995
  0.15260000   2.22710867
  0.15260000   2.22710748
  0.15260000   2.22710638
  0.15260000   2.22710535
  0.15260000   2.22710439
  0.15260000   2.22710349
  0.15260000   2.22710265
  0.15260000   2.22710185
  0.15260000   2.22710110
  0.15260000   2.22710040
  0.15260000   2.22709973
  0.15260000   2.22709910
  0.15260000   2.22709850
  0.15260000   2.22709793
  0.15260000   2.22709738
  0.15280000   2.22795927
  0.15280000   2.22795686
  0.15280000   2.22795468
  0.15280000   2.22795271
  0.15280000   2.22795092
  0.15280000   2.22794928
  0.15280000   2.22794778
  0.15280000   2.22794639
  0.15280000   2.22794511
  0.15280000   2.22794393
  0.15280000   2.22794282
  0.15280000   2.22794179
  0.15280000   2.22794083
  0.15280000   2.22793993
  0.15280000   2.22793909
  0.15280000   2.22793829
  0.15280000   2.22793754
  0.15280000   2.22793684
  0.15280000   2.22793617
  0.15280000   2.22793553
  0.15280000   2.22793493
  0.15280000   2.22793436
  0.15280000   2.22793382
  0.15300000   2.22878984
  0.15300000   2.22878743
  0.15300000   2.22878525
  0.15300000   2.22878328
  0.15300000   2.22878149
  0.15300000   2.22877985
  0.15300000   2.22877835
  0.15300000   2.22877696
  0.15300000   2.22877568
  0.15300000   2.22877450
  0.15300000   2.22877339
  0.15300000   2.22877236
  0.15300000   2.22877140
  0.15300000   2.22877050
  0.15300000   2.22876965
  0.15300000   2.22876886
  0.15300000   2.22876811
  0.15300000   2.22876740
  0.15300000   2.22876673
  0.15300000   2.22876610
  0.15300000   2.22876549
  0.15300000   2.22876492
  0.15300000   2.22876438
  0.15320000   2.22961460
  0.15320000   2.22961218
  0.15320000   2.22961001
  0.15320000   2.22960804
  0.15320000   2.22960625
  0.15320000   2.22960461
  0.15320000   2.22960311
  0.15320000   2.22960172
  0.15320000   2.22960044
  0.15320000   2.22959925
  0.15320000   2.22959815
  0.15320000   2.22959712
  0.15320000   2.22959616
  0.15320000   2.22959525
  0.15320000   2.22959441
  0.15320000   2.22959361
  0.15320000   2.22959286
  0.15320000   2.22959215
  0.15320000   2.22959148
  0.15320000   2.22959084
  0.15320000   2.22959024
  0.15320000   2.22958967
  0.15320000   2.22958913
  0.15340000   2.23043360
  0.15340000   2.23043119
  0.15340000   2.23042902
  0.15340000   2.23042705
  0.15340000   2.23042526
  0.15340000   2.23042362
  0.15340000   2.23042212
  0.15340000   2.23042073
  0.15340000   2.23041945
  0.15340000   2.23041826
  0.15340000   2.23041715
  0.15340000   2.23041612
  0.15340000   2.23041516
  0.15340000   2.23041426
  0.15340000   2.23041341
  0.15340000   2.23041261
  0.15340000   2.23041186
  0.15340000   2.23041115
  0.15340000   2.23041048
  0.15340000   2.23040984
  0.15340000   2.23040924
  0.15340000   2.23040867
  0.15340000   2.23040812
  0.15360000   2.23124692
  0.15360000   2.23124451
  0.15360000   2.23124234
  0.15360000   2.23124037
  0.15360000   2.23123858
  0.15360000   2.23123694
  0.15360000   2.23123544
  0.15360000   2.23123405
  0.15360000   2.23123277
  0.15360000   2.23123158
  0.15360000   2.23123047
  0.15360000   2.23122944
  0.15360000   2.23122848
  0.15360000   2.23122757
  0.15360000   2.23122672
  0.15360000   2.23122593
  0.15360000   2.23122517
  0.15360000   2.23122446
  0.15360000   2.23122379
  0.15360000   2.23122315
  0.15360000   2.23122255
  0.15360000   2.23122198
  0.15360000   2.23122143
  0.15380000   2.23205461
  0.15380000   2.23205220
  0.15380000   2.23205003
  0.15380000   2.23204806
  0.15380000   2.23204627
  0.15380000   2.23204463
  0.15380000   2.23204313
  0.15380000   2.23204174
  0.15380000   2.23204046
  0.15380000   2.23203927
  0.15380000   2.23203816
  0.15380000   2.23203713
  0.15380000   2.23203616
  0.15380000   2.23203526
  0.15380000   2.23203441
  0.15380000   2.23203361
  0.15380000   2.23203286
  0.15380000   2.23203214
  0.15380000   2.23203147
  0.15380000   2.23203083
  0.15380000   2.23203023
  0.15380000   2.23202965
  0.15380000   2.23202911
  0.15400000   2.23285673
  0.15400000   2.23285432
  0.15400000   2.23285215
  0.15400000   2.23285018
  0.15400000   2.23284839
  0.15400000   2.23284675
  0.15400000   2.23284525
  0.15400000   2.23284386
  0.15400000   2.23284258
  0.15400000   2.23284139
  0.15400000   2.23284028
  0.15400000   2.23283924
  0.15400000   2.23283828
  0.15400000   2.23283737
  0.15400000   2.23283652
  0.15400000   2.23283572
  0.15400000   2.23283497
  0.15400000   2.23283426
  0.15400000   2.23283358
  0.15400000   2.23283294
  0.15400000   2.23283234
  0.15400000   2.23283176
  0.15400000   2.23283122
  0.15420000   2.23365333
  0.15420000   2.23365093
  0.15420000   2.23364876
  0.15420000   2.23364679
  0.15420000   2.23364500
  0.15420000   2.23364336
  0.15420000   2.23364186
  0.15420000   2.23364047
  0.15420000   2.23363918
  0.15420000   2.23363799
  0.15420000   2.23363688
  0.15420000   2.23363585
  0.15420000   2.23363488
  0.15420000   2.23363398
  0.15420000   2.23363313
  0.15420000   2.23363232
  0.15420000   2.23363157
  0.15420000   2.23363086
  0.15420000   2.23363018
  0.15420000   2.23362954
  0.15420000   2.23362894
  0.15420000   2.23362836
  0.15420000   2.23362781
  0.15440000   2.23444449
  0.15440000   2.23444208
  0.15440000   2.23443991
  0.15440000   2.23443795
  0.15440000   2.23443616
  0.15440000   2.23443452
  0.15440000   2.23443301
  0.15440000   2.23443162
  0.15440000   2.23443034
  0.15440000   2.23442914
  0.15440000   2.23442803
  0.15440000   2.23442700
  0.15440000   2.23442603
  0.15440000   2.23442513
  0.15440000   2.23442427
  0.15440000   2.23442347
  0.15440000   2.23442272
  0.15440000   2.23442200
  0.15440000   2.23442133
  0.15440000   2.23442069
  0.15440000   2.23442008
  0.15440000   2.23441950
  0.15440000   2.23441896
  0.15460000   2.23523024
  0.15460000   2.23522784
  0.15460000   2.23522567
  0.15460000   2.23522371
  0.15460000   2.23522191
  0.15460000   2.23522027
  0.15460000   2.23521877
  0.15460000   2.23521738
  0.15460000   2.23521609
  0.15460000   2.23521490
  0.15460000   2.23521379
  0.15460000   2.23521275
  0.15460000   2.23521179
  0.15460000   2.23521088
  0.15460000   2.23521003
  0.15460000   2.23520922
  0.15460000   2.23520847
  0.15460000   2.23520775
  0.15460000   2.23520708
  0.15460000   2.23520644
  0.15460000   2.23520583
  0.15460000   2.23520525
  0.15460000   2.23520470
  0.15480000   2.23601066
  0.15480000   2.23600826
  0.15480000   2.23600609
  0.15480000   2.23600412
  0.15480000   2.23600233
  0.15480000   2.23600069
  0.15480000   2.23599918
  0.15480000   2.23599779
  0.15480000   2.23599651
  0.15480000   2.23599531
  0.15480000   2.23599420
  0.15480000   2.23599317
  0.15480000   2.23599220
  0.15480000   2.23599129
  0.15480000   2.23599044
  0.15480000   2.23598963
  0.15480000   2.23598887
  0.15480000   2.23598816
  0.15480000   2.23598748
  0.15480000   2.23598684
  0.15480000   2.23598623
  0.15480000   2.23598565
  0.15480000   2.23598510
  0.15500000   2.23678579
  0.15500000   2.23678339
  0.15500000   2.23678122
  0.15500000   2.23677925
  0.15500000   2.23677746
  0.15500000   2.23677582
  0.15500000   2.23677431
  0.15500000   2.23677292
  0.15500000   2.23677163
  0.15500000   2.23677044
  0.15500000   2.23676933
  0.15500000   2.23676829
  0.15500000   2.23676732
  0.15500000   2.23676641
  0.15500000   2.23676556
  0.15500000   2.23676475
  0.15500000   2.23676400
  0.15500000   2.23676328
  0.15500000   2.23676260
  0.15500000   2.23676196
  0.15500000   2.23676135
  0.15500000   2.23676077
  0.15500000   2.23676022
  0.15520000   2.23755568
  0.15520000   2.23755328
  0.15520000   2.23755112
  0.15520000   2.23754915
  0.15520000   2.23754736
  0.15520000   2.23754572
  0.15520000   2.23754421
  0.15520000   2.23754282
  0.15520000   2.23754153
  0.15520000   2.23754033
  0.15520000   2.23753922
  0.15520000   2.23753818
  0.15520000   2.23753721
  0.15520000   2.23753630
  0.15520000   2.23753545
  0.15520000   2.23753464
  0.15520000   2.23753388
  0.15520000   2.23753317
  0.15520000   2.23753249
  0.15520000   2.23753185
  0.15520000   2.23753123
  0.15520000   2.23753066
  0.15520000   2.23753010
  0.15540000   2.23832040
  0.15540000   2.23831800
  0.15540000   2.23831583
  0.15540000   2.23831387
  0.15540000   2.23831208
  0.15540000   2.23831043
  0.15540000   2.23830893
  0.15540000   2.23830753
  0.15540000   2.23830624
  0.15540000   2.23830505
  0.15540000   2.23830394
  0.15540000   2.23830290
  0.15540000   2.23830193
  0.15540000   2.23830101
  0.15540000   2.23830016
  0.15540000   2.23829935
  0.15540000   2.23829859
  0.15540000   2.23829788
  0.15540000   2.23829720
  0.15540000   2.23829655
  0.15540000   2.23829594
  0.15540000   2.23829536
  0.15540000   2.23829481
  0.15560000   2.23907999
  0.15560000   2.23907759
  0.15560000   2.23907543
  0.15560000   2.23907346
  0.15560000   2.23907167
  0.15560000   2.23907003
  0.15560000   2.23906852
  0.15560000   2.23906712
  0.15560000   2.23906584
  0.15560000   2.23906464
  0.15560000   2.23906352
  0.15560000   2.23906248
  0.15560000   2.23906151
  0.15560000   2.23906060
  0.15560000   2.23905974
  0.15560000   2.23905894
  0.15560000   2.23905818
  0.15560000   2.23905746
  0.15560000   2.23905678
  0.15560000   2.23905613
  0.15560000   2.23905552
  0.15560000   2.23905494
  0.15560000   2.23905439
  0.15580000   2.23983451
  0.15580000   2.23983211
  0.15580000   2.23982994
  0.15580000   2.23982798
  0.15580000   2.23982619
  0.15580000   2.23982454
  0.15580000   2.23982303
  0.15580000   2.23982164
  0.15580000   2.23982035
  0.15580000   2.23981915
  0.15580000   2.23981804
  0.15580000   2.23981700
  0.15580000   2.23981602
  0.15580000   2.23981511
  0.15580000   2.23981425
  0.15580000   2.23981345
  0.15580000   2.23981268
  0.15580000   2.23981196
  0.15580000   2.23981128
  0.15580000   2.23981064
  0.15580000   2.23981003
  0.15580000   2.23980944
  0.15580000   2.23980889
  0.15600000   2.24058400
  0.15600000   2.24058161
  0.15600000   2.24057944
  0.15600000   2.24057747
  0.15600000   2.24057568
  0.15600000   2.24057404
  0.15600000   2.24057253
  0.15600000   2.24057113
  0.15600000   2.24056984
  0.15600000   2.24056864
  0.15600000   2.24056753
  0.15600000   2.24056649
  0.15600000   2.24056551
  0.15600000   2.24056460
  0.15600000   2.24056374
  0.15600000   2.24056293
  0.15600000   2.24056217
  0.15600000   2.24056145
  0.15600000   2.24056077
  0.15600000   2.24056012
  0.15600000   2.24055951
  0.15600000   2.24055892
  0.15600000   2.24055837
  0.15620000   2.24132852
  0.15620000   2.24132613
  0.15620000   2.24132396
  0.15620000   2.24132200
  0.15620000   2.24132020
  0.15620000   2.24131856
  0.15620000   2.24131705
  0.15620000   2.24131565
  0.15620000   2.24131436
  0.15620000   2.24131316
  0.15620000   2.24131205
  0.15620000   2.24131100
  0.15620000   2.24131003
  0.15620000   2.24130911
  0.15620000   2.24130825
  0.15620000   2.24130745
  0.15620000   2.24130668
  0.15620000   2.24130596
  0.15620000   2.24130528
  0.15620000   2.24130463
  0.15620000   2.24130402
  0.15620000   2.24130343
  0.15620000   2.24130288
  0.15640000   2.24206812
  0.15640000   2.24206573
  0.15640000   2.24206356
  0.15640000   2.24206159
  0.15640000   2.24205980
  0.15640000   2.24205816
  0.15640000   2.24205665
  0.15640000   2.24205525
  0.15640000   2.24205396
  0.15640000   2.24205276
  0.15640000   2.24205164
  0.15640000   2.24205060
  0.15640000   2.24204962
  0.15640000   2.24204871
  0.15640000   2.24204784
  0.15640000   2.24204703
  0.15640000   2.24204627
  0.15640000   2.24204555
  0.15640000   2.24204487
  0.15640000   2.24204422
  0.15640000   2.24204360
  0.15640000   2.24204302
  0.15640000   2.24204246
  0.15660000   2.24280285
  0.15660000   2.24280045
  0.15660000   2.24279829
  0.15660000   2.24279632
  0.15660000   2.24279453
  0.15660000   2.24279288
  0.15660000   2.24279137
  0.15660000   2.24278997
  0.15660000   2.24278868
  0.15660000   2.24278748
  0.15660000   2.24278636
  0.15660000   2.24278532
  0.15660000   2.24278434
  0.15660000   2.24278342
  0.15660000   2.24278256
  0.15660000   2.24278175
  0.15660000   2.24278099
  0.15660000   2.24278026
  0.15660000   2.24277958
  0.15660000   2.24277893
  0.15660000   2.24277831
  0.15660000   2.24277773
  0.15660000   2.24277717
  0.15680000   2.24353275
  0.15680000   2.24353035
  0.15680000   2.24352819
  0.15680000   2.24352622
  0.15680000   2.24352443
  0.15680000   2.24352278
  0.15680000   2.24352127
  0.15680000   2.24351987
  0.15680000   2.24351858
  0.15680000   2.24351737
  0.15680000   2.24351626
  0.15680000   2.24351521
  0.15680000   2.24351423
  0.15680000   2.24351332
  0.15680000   2.24351245
  0.15680000   2.24351164
  0.15680000   2.24351088
  0.15680000   2.24351015
  0.15680000   2.24350947
  0.15680000   2.24350882
  0.15680000   2.24350820
  0.15680000   2.24350761
  0.15680000   2.24350706
  0.15700000   2.24425787
  0.15700000   2.24425547
  0.15700000   2.24425331
  0.15700000   2.24425134
  0.15700000   2.24424955
  0.15700000   2.24424790
  0.15700000   2.24424639
  0.15700000   2.24424499
  0.15700000   2.24424369
  0.15700000   2.24424249
  0.15700000   2.24424137
  0.15700000   2.24424033
  0.15700000   2.24423935
  0.15700000   2.24423843
  0.15700000   2.24423757
  0.15700000   2.24423675
  0.15700000   2.24423599
  0.15700000   2.24423526
  0.15700000   2.24423458
  0.15700000   2.24423393
  0.15700000   2.24423331
  0.15700000   2.24423272
  0.15700000   2.24423216
  0.15720000   2.24497826
  0.15720000   2.24497586
  0.15720000   2.24497370
  0.15720000   2.24497173
  0.15720000   2.24496994
  0.15720000   2.24496829
  0.15720000   2.24496678
  0.15720000   2.24496538
  0.15720000   2.24496408
  0.15720000   2.24496288
  0.15720000   2.24496176
  0.15720000   2.24496071
  0.15720000   2.24495973
  0.15720000   2.24495881
  0.15720000   2.24495795
  0.15720000   2.24495713
  0.15720000   2.24495637
  0.15720000   2.24495564
  0.15720000   2.24495496
  0.15720000   2.24495430
  0.15720000   2.24495369
  0.15720000   2.24495310
  0.15720000   2.24495254
  0.15740000   2.24569397
  0.15740000   2.24569157
  0.15740000   2.24568941
  0.15740000   2.24568744
  0.15740000   2.24568564
  0.15740000   2.24568400
  0.15740000   2.24568248
  0.15740000   2.24568108
  0.15740000   2.24567979
  0.15740000   2.24567858
  0.15740000   2.24567746
  0.15740000   2.24567641
  0.15740000   2.24567543
  0.15740000   2.24567451
  0.15740000   2.24567365
  0.15740000   2.24567283
  0.15740000   2.24567206
  0.15740000   2.24567134
  0.15740000   2.24567065
  0.15740000   2.24567000
  0.15740000   2.24566938
  0.15740000   2.24566879
  0.15740000   2.24566823
  0.15760000   2.24640503
  0.15760000   2.24640264
  0.15760000   2.24640048
  0.15760000   2.24639851
  0.15760000   2.24639671
  0.15760000   2.24639506
  0.15760000   2.24639355
  0.15760000   2.24639215
  0.15760000   2.24639085
  0.15760000   2.24638965
  0.15760000   2.24638852
  0.15760000   2.24638747
  0.15760000   2.24638649
  0.15760000   2.24638557
  0.15760000   2.24638471
  0.15760000   2.24638389
  0.15760000   2.24638312
  0.15760000   2.24638239
  0.15760000   2.24638171
  0.15760000   2.24638105
  0.15760000   2.24638043
  0.15760000   2.24637984
  0.15760000   2.24637928
  0.15780000   2.24711151
  0.15780000   2.24710912
  0.15780000   2.24710695
  0.15780000   2.24710498
  0.15780000   2.24710319
  0.15780000   2.24710154
  0.15780000   2.24710002
  0.15780000   2.24709862
  0.15780000   2.24709732
  0.15780000   2.24709612
  0.15780000   2.24709499
  0.15780000   2.24709394
  0.15780000   2.24709296
  0.15780000   2.24709204
  0.15780000   2.24709117
  0.15780000   2.24709035
  0.15780000   2.24708958
  0.15780000   2.24708886
  0.15780000   2.24708817
  0.15780000   2.24708751
  0.15780000   2.24708689
  0.15780000   2.24708630
  0.15780000   2.24708574
  0.15800000   2.24781344
  0.15800000   2.24781104
  0.15800000   2.24780888
  0.15800000   2.24780691
  0.15800000   2.24780511
  0.15800000   2.24780346
  0.15800000   2.24780194
  0.15800000   2.24780054
  0.15800000   2.24779924
  0.15800000   2.24779804
  0.15800000   2.24779691
  0.15800000   2.24779586
  0.15800000   2.24779488
  0.15800000   2.24779396
  0.15800000   2.24779309
  0.15800000   2.24779227
  0.15800000   2.24779150
  0.15800000   2.24779077
  0.15800000   2.24779008
  0.15800000   2.24778943
  0.15800000   2.24778880
  0.15800000   2.24778821
  0.15800000   2.24778765
  0.15820000   2.24851086
  0.15820000   2.24850846
  0.15820000   2.24850630
  0.15820000   2.24850433
  0.15820000   2.24850253
  0.15820000   2.24850088
  0.15820000   2.24849936
  0.15820000   2.24849796
  0.15820000   2.24849666
  0.15820000   2.24849545
  0.15820000   2.24849433
  0.15820000   2.24849328
  0.15820000   2.24849229
  0.15820000   2.24849137
  0.15820000   2.24849050
  0.15820000   2.24848968
  0.15820000   2.24848891
  0.15820000   2.24848818
  0.15820000   2.24848749
  0.15820000   2.24848683
  0.15820000   2.24848621
  0.15820000   2.24848562
  0.15820000   2.24848506
  0.15840000   2.24920382
  0.15840000   2.24920142
  0.15840000   2.24919926
  0.15840000   2.24919729
  0.15840000   2.24919549
  0.15840000   2.24919384
  0.15840000   2.24919232
  0.15840000   2.24919092
  0.15840000   2.24918962
  0.15840000   2.24918841
  0.15840000   2.24918728
  0.15840000   2.24918623
  0.15840000   2.24918524
  0.15840000   2.24918432
  0.15840000   2.24918345
  0.15840000   2.24918263
  0.15840000   2.24918186
  0.15840000   2.24918113
  0.15840000   2.24918043
  0.15840000   2.24917978
  0.15840000   2.24917916
  0.15840000   2.24917856
  0.15840000   2.24917800
  0.15860000   2.24989236
  0.15860000   2.24988997
  0.15860000   2.24988780
  0.15860000   2.24988583
  0.15860000   2.24988403
  0.15860000   2.24988238
  0.15860000   2.24988086
  0.15860000   2.24987945
  0.15860000   2.24987815
  0.15860000   2.24987694
  0.15860000   2.24987582
  0.15860000   2.24987476
  0.15860000   2.24987378
  0.15860000   2.24987285
  0.15860000   2.24987198
  0.15860000   2.24987116
  0.15860000   2.24987039
  0.15860000   2.24986966
  0.15860000   2.24986896
  0.15860000   2.24986831
  0.15860000   2.24986768
  0.15860000   2.24986709
  0.15860000   2.24986652
  0.15880000   2.25057652
  0.15880000   2.25057413
  0.15880000   2.25057196
  0.15880000   2.25056999
  0.15880000   2.25056819
  0.15880000   2.25056654
  0.15880000   2.25056502
  0.15880000   2.25056362
  0.15880000   2.25056231
  0.15880000   2.25056110
  0.15880000   2.25055997
  0.15880000   2.25055892
  0.15880000   2.25055793
  0.15880000   2.25055701
  0.15880000   2.25055613
  0.15880000   2.25055531
  0.15880000   2.25055454
  0.15880000   2.25055381
  0.15880000   2.25055311
  0.15880000   2.25055246
  0.15880000   2.25055183
  0.15880000   2.25055124
  0.15880000   2.25055067
  0.15900000   2.25125635
  0.15900000   2.25125396
  0.15900000   2.25125179
  0.15900000   2.25124982
  0.15900000   2.25124802
  0.15900000   2.25124637
  0.15900000   2.25124485
  0.15900000   2.25124344
  0.15900000   2.25124214
  0.15900000   2.25124093
  0.15900000   2.25123980
  0.15900000   2.25123874
  0.15900000   2.25123775
  0.15900000   2.25123683
  0.15900000   2.25123595
  0.15900000   2.25123513
  0.15900000   2.25123436
  0.15900000   2.25123362
  0.15900000   2.25123293
  0.15900000   2.25123227
  0.15900000   2.25123164
  0.15900000   2.25123105
  0.15900000   2.25123048
  0.15920000   2.25193189
  0.15920000   2.25192950
  0.15920000   2.25192733
  0.15920000   2.25192536
  0.15920000   2.25192356
  0.15920000   2.25192190
  0.15920000   2.25192038
  0.15920000   2.25191897
  0.15920000   2.25191767
  0.15920000   2.25191646
  0.15920000   2.25191533
  0.15920000   2.25191427
  0.15920000   2.25191328
  0.15920000   2.25191235
  0.15920000   2.25191148
  0.15920000   2.25191066
  0.15920000   2.25190988
  0.15920000   2.25190915
  0.15920000   2.25190845
  0.15920000   2.25190779
  0.15920000   2.25190716
  0.15920000   2.25190657
  0.15920000   2.25190600
  0.15940000   2.25260317
  0.15940000   2.25260078
  0.15940000   2.25259861
  0.15940000   2.25259664
  0.15940000   2.25259484
  0.15940000   2.25259318
  0.15940000   2.25259166
  0.15940000   2.25259025
  0.15940000   2.25258895
  0.15940000   2.25258773
  0.15940000   2.25258660
  0.15940000   2.25258554
  0.15940000   2.25258455
  0.15940000   2.25258363
  0.15940000   2.25258275
  0.15940000   2.25258193
  0.15940000   2.25258115
  0.15940000   2.25258041
  0.15940000   2.25257972
  0.15940000   2.25257906
  0.15940000   2.25257843
  0.15940000   2.25257784
  0.15940000   2.25257727
  0.15960000   2.25327024
  0.15960000   2.25326785
  0.15960000   2.25326568
  0.15960000   2.25326371
  0.15960000   2.25326191
  0.15960000   2.25326025
  0.15960000   2.25325873
  0.15960000   2.25325732
  0.15960000   2.25325601
  0.15960000   2.25325480
  0.15960000   2.25325366
  0.15960000   2.25325261
  0.15960000   2.25325161
  0.15960000   2.25325068
  0.15960000   2.25324981
  0.15960000   2.25324898
  0.15960000   2.25324821
  0.15960000   2.25324747
  0.15960000   2.25324677
  0.15960000   2.25324611
  0.15960000   2.25324548
  0.15960000   2.25324489
  0.15960000   2.25324432
  0.15980000   2.25393313
  0.15980000   2.25393074
  0.15980000   2.25392858
  0.15980000   2.25392660
  0.15980000   2.25392480
  0.15980000   2.25392314
  0.15980000   2.25392162
  0.15980000   2.25392021
  0.15980000   2.25391890
  0.15980000   2.25391769
  0.15980000   2.25391655
  0.15980000   2.25391549
  0.15980000   2.25391450
  0.15980000   2.25391357
  0.15980000   2.25391269
  0.15980000   2.25391187
  0.15980000   2.25391109
  0.15980000   2.25391035
  0.15980000   2.25390965
  0.15980000   2.25390899
  0.15980000   2.25390836
  0.15980000   2.25390776
  0.15980000   2.25390719
  0.16000000   2.25459190
  0.16000000   2.25458950
  0.16000000   2.25458734
  0.16000000   2.25458536
  0.16000000   2.25458356
  0.16000000   2.25458190
  0.16000000   2.25458037
  0.16000000   2.25457896
  0.16000000   2.25457766
  0.16000000   2.25457644
  0.16000000   2.25457530
  0.16000000   2.25457424
  0.16000000   2.25457325
  0.16000000   2.25457232
  0.16000000   2.25457144
  0.16000000   2.25457062
  0.16000000   2.25456984
  0.16000000   2.25456910
  0.16000000   2.25456840
  0.16000000   2.25456774
  0.16000000   2.25456711
  0.16000000   2.25456651
  0.16000000   2.25456594
  0.16020000   2.25524656
  0.16020000   2.25524417
  0.16020000   2.25524200
  0.16020000   2.25524002
  0.16020000   2.25523822
  0.16020000   2.25523656
  0.16020000   2.25523503
  0.16020000   2.25523362
  0.16020000   2.25523231
  0.16020000   2.25523110
  0.16020000   2.25522996
  0.16020000   2.25522890
  0.16020000   2.25522791
  0.16020000   2.25522697
  0.16020000   2.25522609
  0.16020000   2.25522527
  0.16020000   2.25522449
  0.16020000   2.25522375
  0.16020000   2.25522305
  0.16020000   2.25522238
  0.16020000   2.25522175
  0.16020000   2.25522115
  0.16020000   2.25522058
  0.16040000   2.25589717
  0.16040000   2.25589477
  0.16040000   2.25589260
  0.16040000   2.25589063
  0.16040000   2.25588882
  0.16040000   2.25588716
  0.16040000   2.25588564
  0.16040000   2.25588422
  0.16040000   2.25588291
  0.16040000   2.25588170
  0.16040000   2.25588056
  0.16040000   2.25587950
  0.16040000   2.25587850
  0.16040000   2.25587757
  0.16040000   2.25587669
  0.16040000   2.25587586
  0.16040000   2.25587508
  0.16040000   2.25587434
  0.16040000   2.25587364
  0.16040000   2.25587297
  0.16040000   2.25587234
  0.16040000   2.25587174
  0.16040000   2.25587117
  0.16060000   2.25654375
  0.16060000   2.25654136
  0.16060000   2.25653919
  0.16060000   2.25653721
  0.16060000   2.25653540
  0.16060000   2.25653375
  0.16060000   2.25653222
  0.16060000   2.25653080
  0.16060000   2.25652949
  0.16060000   2.25652827
  0.16060000   2.25652714
  0.16060000   2.25652607
  0.16060000   2.25652508
  0.16060000   2.25652414
  0.16060000   2.25652326
  0.16060000   2.25652243
  0.16060000   2.25652165
  0.16060000   2.25652091
  0.16060000   2.25652021
  0.16060000   2.25651954
  0.16060000   2.25651891
  0.16060000   2.25651831
  0.16060000   2.25651774
  0.16080000   2.25718635
  0.16080000   2.25718396
  0.16080000   2.25718179
  0.16080000   2.25717981
  0.16080000   2.25717800
  0.16080000   2.25717634
  0.16080000   2.25717481
  0.16080000   2.25717340
  0.16080000   2.25717209
  0.16080000   2.25717087
  0.16080000   2.25716973
  0.16080000   2.25716866
  0.16080000   2.25716767
  0.16080000   2.25716673
  0.16080000   2.25716585
  0.16080000   2.25716502
  0.16080000   2.25716424
  0.16080000   2.25716349
  0.16080000   2.25716279
  0.16080000   2.25716213
  0.16080000   2.25716149
  0.16080000   2.25716089
  0.16080000   2.25716032
  0.16100000   2.25782500
  0.16100000   2.25782261
  0.16100000   2.25782044
  0.16100000   2.25781846
  0.16100000   2.25781665
  0.16100000   2.25781499
  0.16100000   2.25781346
  0.16100000   2.25781205
  0.16100000   2.25781073
  0.16100000   2.25780951
  0.16100000   2.25780837
  0.16100000   2.25780731
  0.16100000   2.25780631
  0.16100000   2.25780537
  0.16100000   2.25780449
  0.16100000   2.25780366
  0.16100000   2.25780288
  0.16100000   2.25780213
  0.16100000   2.25780143
  0.16100000   2.25780076
  0.16100000   2.25780013
  0.16100000   2.25779953
  0.16100000   2.25779895
  0.16120000   2.25845975
  0.16120000   2.25845735
  0.16120000   2.25845518
  0.16120000   2.25845320
  0.16120000   2.25845139
  0.16120000   2.25844973
  0.16120000   2.25844820
  0.16120000   2.25844678
  0.16120000   2.25844547
  0.16120000   2.25844425
  0.16120000   2.25844311
  0.16120000   2.25844204
  0.16120000   2.25844104
  0.16120000   2.25844010
  0.16120000   2.25843922
  0.16120000   2.25843839
  0.16120000   2.25843760
  0.16120000   2.25843686
  0.16120000   2.25843616
  0.16120000   2.25843549
  0.16120000   2.25843485
  0.16120000   2.25843425
  0.16120000   2.25843367
  0.16140000   2.25909061
  0.16140000   2.25908822
  0.16140000   2.25908605
  0.16140000   2.25908407
  0.16140000   2.25908226
  0.16140000   2.25908059
  0.16140000   2.25907906
  0.16140000   2.25907764
  0.16140000   2.25907633
  0.16140000   2.25907511
  0.16140000   2.25907396
  0.16140000   2.25907290
  0.16140000   2.25907190
  0.16140000   2.25907096
  0.16140000   2.25907007
  0.16140000   2.25906924
  0.16140000   2.25906845
  0.16140000   2.25906771
  0.16140000   2.25906701
  0.16140000   2.25906634
  0.16140000   2.25906570
  0.16140000   2.25906510
  0.16140000   2.25906452
  0.16160000   2.25971764
  0.16160000   2.25971524
  0.16160000   2.25971307
  0.16160000   2.25971109
  0.16160000   2.25970928
  0.16160000   2.25970762
  0.16160000   2.25970608
  0.16160000   2.25970466
  0.16160000   2.25970335
  0.16160000   2.25970212
  0.16160000   2.25970098
  0.16160000   2.25969991
  0.16160000   2.25969891
  0.16160000   2.25969797
  0.16160000   2.25969709
  0.16160000   2.25969625
  0.16160000   2.25969547
  0.16160000   2.25969472
  0.16160000   2.25969401
  0.16160000   2.25969335
  0.16160000   2.25969271
  0.16160000   2.25969210
  0.16160000   2.25969153
  0.16180000   2.26034086
  0.16180000   2.26033846
  0.16180000   2.26033629
  0.16180000   2.26033431
  0.16180000   2.26033250
  0.16180000   2.26033083
  0.16180000   2.26032930
  0.16180000   2.26032788
  0.16180000   2.26032656
  0.16180000   2.26032534
  0.16180000   2.26032419
  0.16180000   2.26032312
  0.16180000   2.26032212
  0.16180000   2.26032118
  0.16180000   2.26032029
  0.16180000   2.26031946
  0.16180000   2.26031867
  0.16180000   2.26031792
  0.16180000   2.26031722
  0.16180000   2.26031655
  0.16180000   2.26031591
  0.16180000   2.26031530
  0.16180000   2.26031473
  0.16200000   2.26096030
  0.16200000   2.26095791
  0.16200000   2.26095574
  0.16200000   2.26095375
  0.16200000   2.26095194
  0.16200000   2.26095028
  0.16200000   2.26094874
  0.16200000   2.26094732
  0.16200000   2.26094600
  0.16200000   2.26094478
  0.16200000   2.26094363
  0.16200000   2.26094256
  0.16200000   2.26094156
  0.16200000   2.26094061
  0.16200000   2.26093973
  0.16200000   2.26093889
  0.16200000   2.26093810
  0.16200000   2.26093736
  0.16200000   2.26093665
  0.16200000   2.26093598
  0.16200000   2.26093534
  0.16200000   2.26093473
  0.16200000   2.26093416
  0.16220000   2.26157602
  0.16220000   2.26157362
  0.16220000   2.26157145
  0.16220000   2.26156946
  0.16220000   2.26156765
  0.16220000   2.26156598
  0.16220000   2.26156445
  0.16220000   2.26156302
  0.16220000   2.26156170
  0.16220000   2.26156048
  0.16220000   2.26155933
  0.16220000   2.26155826
  0.16220000   2.26155726
  0.16220000   2.26155631
  0.16220000   2.26155543
  0.16220000   2.26155459
  0.16220000   2.26155380
  0.16220000   2.26155305
  0.16220000   2.26155234
  0.16220000   2.26155167
  0.16220000   2.26155103
  0.16220000   2.26155042
  0.16220000   2.26154985
  0.16240000   2.26218802
  0.16240000   2.26218562
  0.16240000   2.26218345
  0.16240000   2.26218147
  0.16240000   2.26217965
  0.16240000   2.26217799
  0.16240000   2.26217645
  0.16240000   2.26217502
  0.16240000   2.26217370
  0.16240000   2.26217247
  0.16240000   2.26217133
  0.16240000   2.26217026
  0.16240000   2.26216925
  0.16240000   2.26216831
  0.16240000   2.26216742
  0.16240000   2.26216658
  0.16240000   2.26216579
  0.16240000   2.26216504
  0.16240000   2.26216433
  0.16240000   2.26216366
  0.16240000   2.26216302
  0.16240000   2.26216241
  0.16240000   2.26216183
  0.16260000   2.26279636
  0.16260000   2.26279396
  0.16260000   2.26279178
  0.16260000   2.26278980
  0.16260000   2.26278798
  0.16260000   2.26278632
  0.16260000   2.26278478
  0.16260000   2.26278335
  0.16260000   2.26278203
  0.16260000   2.26278080
  0.16260000   2.26277965
  0.16260000   2.26277858
  0.16260000   2.26277757
  0.16260000   2.26277663
  0.16260000   2.26277574
  0.16260000   2.26277490
  0.16260000   2.26277411
  0.16260000   2.26277336
  0.16260000   2.26277265
  0.16260000   2.26277197
  0.16260000   2.26277133
  0.16260000   2.26277073
  0.16260000   2.26277014
  0.16280000   2.26340105
  0.16280000   2.26339865
  0.16280000   2.26339648
  0.16280000   2.26339449
  0.16280000   2.26339268
  0.16280000   2.26339101
  0.16280000   2.26338947
  0.16280000   2.26338804
  0.16280000   2.26338672
  0.16280000   2.26338549
  0.16280000   2.26338434
  0.16280000   2.26338327
  0.16280000   2.26338226
  0.16280000   2.26338131
  0.16280000   2.26338042
  0.16280000   2.26337958
  0.16280000   2.26337879
  0.16280000   2.26337804
  0.16280000   2.26337733
  0.16280000   2.26337665
  0.16280000   2.26337601
  0.16280000   2.26337540
  0.16280000   2.26337482
  0.16300000   2.26400214
  0.16300000   2.26399974
  0.16300000   2.26399756
  0.16300000   2.26399558
  0.16300000   2.26399376
  0.16300000   2.26399209
  0.16300000   2.26399055
  0.16300000   2.26398912
  0.16300000   2.26398780
  0.16300000   2.26398657
  0.16300000   2.26398542
  0.16300000   2.26398434
  0.16300000   2.26398333
  0.16300000   2.26398239
  0.16300000   2.26398150
  0.16300000   2.26398066
  0.16300000   2.26397986
  0.16300000   2.26397911
  0.16300000   2.26397840
  0.16300000   2.26397772
  0.16300000   2.26397708
  0.16300000   2.26397647
  0.16300000   2.26397589
  0.16320000   2.26459965
  0.16320000   2.26459726
  0.16320000   2.26459508
  0.16320000   2.26459309
  0.16320000   2.26459127
  0.16320000   2.26458960
  0.16320000   2.26458806
  0.16320000   2.26458663
  0.16320000   2.26458531
  0.16320000   2.26458407
  0.16320000   2.26458292
  0.16320000   2.26458185
  0.16320000   2.26458084
  0.16320000   2.26457989
  0.16320000   2.26457900
  0.16320000   2.26457815
  0.16320000   2.26457736
  0.16320000   2.26457661
  0.16320000   2.26457589
  0.16320000   2.26457522
  0.16320000   2.26457458
  0.16320000   2.26457396
  0.16320000   2.26457338
  0.16340000   2.26519362
  0.16340000   2.26519123
  0.16340000   2.26518905
  0.16340000   2.26518706
  0.16340000   2.26518524
  0.16340000   2.26518357
  0.16340000   2.26518203
  0.16340000   2.26518060
  0.16340000   2.26517927
  0.16340000   2.26517804
  0.16340000   2.26517688
  0.16340000   2.26517581
  0.16340000   2.26517480
  0.16340000   2.26517385
  0.16340000   2.26517295
  0.16340000   2.26517211
  0.16340000   2.26517132
  0.16340000   2.26517056
  0.16340000   2.26516985
  0.16340000   2.26516917
  0.16340000   2.26516853
  0.16340000   2.26516791
  0.16340000   2.26516733
  0.16360000   2.26578408
  0.16360000   2.26578168
  0.16360000   2.26577950
  0.16360000   2.26577752
  0.16360000   2.26577570
  0.16360000   2.26577402
  0.16360000   2.26577248
  0.16360000   2.26577105
  0.16360000   2.26576972
  0.16360000   2.26576849
  0.16360000   2.26576733
  0.16360000   2.26576625
  0.16360000   2.26576524
  0.16360000   2.26576429
  0.16360000   2.26576340
  0.16360000   2.26576256
  0.16360000   2.26576176
  0.16360000   2.26576100
  0.16360000   2.26576029
  0.16360000   2.26575961
  0.16360000   2.26575897
  0.16360000   2.26575835
  0.16360000   2.26575777
  0.16380000   2.26637106
  0.16380000   2.26636866
  0.16380000   2.26636648
  0.16380000   2.26636449
  0.16380000   2.26636267
  0.16380000   2.26636099
  0.16380000   2.26635945
  0.16380000   2.26635802
  0.16380000   2.26635669
  0.16380000   2.26635545
  0.16380000   2.26635430
  0.16380000   2.26635322
  0.16380000   2.26635221
  0.16380000   2.26635126
  0.16380000   2.26635036
  0.16380000   2.26634952
  0.16380000   2.26634872
  0.16380000   2.26634796
  0.16380000   2.26634725
  0.16380000   2.26634657
  0.16380000   2.26634592
  0.16380000   2.26634531
  0.16380000   2.26634472
  0.16400000   2.26695459
  0.16400000   2.26695218
  0.16400000   2.26695000
  0.16400000   2.26694801
  0.16400000   2.26694619
  0.16400000   2.26694452
  0.16400000   2.26694297
  0.16400000   2.26694154
  0.16400000   2.26694021
  0.16400000   2.26693897
  0.16400000   2.26693782
  0.16400000   2.26693673
  0.16400000   2.26693572
  0.16400000   2.26693477
  0.16400000   2.26693387
  0.16400000   2.26693303
  0.16400000   2.26693223
  0.16400000   2.26693147
  0.16400000   2.26693076
  0.16400000   2.26693008
  0.16400000   2.26692943
  0.16400000   2.26692882
  0.16400000   2.26692823
  0.16420000   2.26753469
  0.16420000   2.26753229
  0.16420000   2.26753011
  0.16420000   2.26752811
  0.16420000   2.26752629
  0.16420000   2.26752462
  0.16420000   2.26752307
  0.16420000   2.26752163
  0.16420000   2.26752030
  0.16420000   2.26751907
  0.16420000   2.26751791
  0.16420000   2.26751683
  0.16420000   2.26751581
  0.16420000   2.26751486
  0.16420000   2.26751396
  0.16420000   2.26751312
  0.16420000   2.26751232
  0.16420000   2.26751156
  0.16420000   2.26751084
  0.16420000   2.26751016
  0.16420000   2.26750951
  0.16420000   2.26750890
  0.16420000   2.26750831
  0.16440000   2.26811140
  0.16440000   2.26810900
  0.16440000   2.26810682
  0.16440000   2.26810483
  0.16440000   2.26810300
  0.16440000   2.26810132
  0.16440000   2.26809977
  0.16440000   2.26809834
  0.16440000   2.26809701
  0.16440000   2.26809577
  0.16440000   2.26809461
  0.16440000   2.26809353
  0.16440000   2.26809251
  0.16440000   2.26809156
  0.16440000   2.26809066
  0.16440000   2.26808981
  0.16440000   2.26808901
  0.16440000   2.26808825
  0.16440000   2.26808754
  0.16440000   2.26808685
  0.16440000   2.26808621
  0.16440000   2.26808559
  0.16440000   2.26808500
  0.16460000   2.26868475
  0.16460000   2.26868235
  0.16460000   2.26868016
  0.16460000   2.26867817
  0.16460000   2.26867635
  0.16460000   2.26867467
  0.16460000   2.26867312
  0.16460000   2.26867168
  0.16460000   2.26867035
  0.16460000   2.26866911
  0.16460000   2.26866795
  0.16460000   2.26866687
  0.16460000   2.26866585
  0.16460000   2.26866489
  0.16460000   2.26866400
  0.16460000   2.26866315
  0.16460000   2.26866234
  0.16460000   2.26866159
  0.16460000   2.26866087
  0.16460000   2.26866018
  0.16460000   2.26865954
  0.16460000   2.26865892
  0.16460000   2.26865833
  0.16480000   2.26925477
  0.16480000   2.26925236
  0.16480000   2.26925018
  0.16480000   2.26924819
  0.16480000   2.26924636
  0.16480000   2.26924468
  0.16480000   2.26924313
  0.16480000   2.26924169
  0.16480000   2.26924036
  0.16480000   2.26923912
  0.16480000   2.26923796
  0.16480000   2.26923687
  0.16480000   2.26923585
  0.16480000   2.26923490
  0.16480000   2.26923400
  0.16480000   2.26923315
  0.16480000   2.26923234
  0.16480000   2.26923158
  0.16480000   2.26923086
  0.16480000   2.26923018
  0.16480000   2.26922953
  0.16480000   2.26922891
  0.16480000   2.26922832
  0.16500000   2.26982148
  0.16500000   2.26981907
  0.16500000   2.26981689
  0.16500000   2.26981489
  0.16500000   2.26981307
  0.16500000   2.26981138
  0.16500000   2.26980983
  0.16500000   2.26980839
  0.16500000   2.26980706
  0.16500000   2.26980582
  0.16500000   2.26980465
  0.16500000   2.26980357
  0.16500000   2.26980255
  0.16500000   2.26980159
  0.16500000   2.26980069
  0.16500000   2.26979984
  0.16500000   2.26979904
  0.16500000   2.26979828
  0.16500000   2.26979756
  0.16500000   2.26979687
  0.16500000   2.26979622
  0.16500000   2.26979560
  0.16500000   2.26979501
  0.16520000   2.27038491
  0.16520000   2.27038250
  0.16520000   2.27038032
  0.16520000   2.27037832
  0.16520000   2.27037649
  0.16520000   2.27037481
  0.16520000   2.27037326
  0.16520000   2.27037182
  0.16520000   2.27037048
  0.16520000   2.27036924
  0.16520000   2.27036808
  0.16520000   2.27036699
  0.16520000   2.27036597
  0.16520000   2.27036501
  0.16520000   2.27036411
  0.16520000   2.27036326
  0.16520000   2.27036245
  0.16520000   2.27036169
  0.16520000   2.27036097
  0.16520000   2.27036029
  0.16520000   2.27035963
  0.16520000   2.27035902
  0.16520000   2.27035842
  0.16540000   2.27094509
  0.16540000   2.27094269
  0.16540000   2.27094050
  0.16540000   2.27093850
  0.16540000   2.27093667
  0.16540000   2.27093499
  0.16540000   2.27093344
  0.16540000   2.27093200
  0.16540000   2.27093066
  0.16540000   2.27092941
  0.16540000   2.27092825
  0.16540000   2.27092716
  0.16540000   2.27092614
  0.16540000   2.27092518
  0.16540000   2.27092428
  0.16540000   2.27092343
  0.16540000   2.27092262
  0.16540000   2.27092186
  0.16540000   2.27092114
  0.16540000   2.27092045
  0.16540000   2.27091980
  0.16540000   2.27091918
  0.16540000   2.27091859
  0.16560000   2.27150206
  0.16560000   2.27149965
  0.16560000   2.27149746
  0.16560000   2.27149546
  0.16560000   2.27149363
  0.16560000   2.27149195
  0.16560000   2.27149039
  0.16560000   2.27148895
  0.16560000   2.27148761
  0.16560000   2.27148637
  0.16560000   2.27148520
  0.16560000   2.27148411
  0.16560000   2.27148309
  0.16560000   2.27148213
  0.16560000   2.27148123
  0.16560000   2.27148037
  0.16560000   2.27147957
  0.16560000   2.27147880
  0.16560000   2.27147808
  0.16560000   2.27147739
  0.16560000   2.27147674
  0.16560000   2.27147612
  0.16560000   2.27147553
  0.16580000   2.27205582
  0.16580000   2.27205342
  0.16580000   2.27205123
  0.16580000   2.27204923
  0.16580000   2.27204740
  0.16580000   2.27204571
  0.16580000   2.27204415
  0.16580000   2.27204271
  0.16580000   2.27204137
  0.16580000   2.27204012
  0.16580000   2.27203896
  0.16580000   2.27203787
  0.16580000   2.27203685
  0.16580000   2.27203588
  0.16580000   2.27203498
  0.16580000   2.27203412
  0.16580000   2.27203332
  0.16580000   2.27203255
  0.16580000   2.27203183
  0.16580000   2.27203114
  0.16580000   2.27203049
  0.16580000   2.27202986
  0.16580000   2.27202927
  0.16600000   2.27260643
  0.16600000   2.27260402
  0.16600000   2.27260183
  0.16600000   2.27259983
  0.16600000   2.27259799
  0.16600000   2.27259631
  0.16600000   2.27259475
  0.16600000   2.27259330
  0.16600000   2.27259196
  0.16600000   2.27259071
  0.16600000   2.27258955
  0.16600000   2.27258846
  0.16600000   2.27258743
  0.16600000   2.27258647
  0.16600000   2.27258556
  0.16600000   2.27258471
  0.16600000   2.27258390
  0.16600000   2.27258314
  0.16600000   2.27258241
  0.16600000   2.27258172
  0.16600000   2.27258107
  0.16600000   2.27258044
  0.16600000   2.27257985
  0.16620000   2.27315388
  0.16620000   2.27315147
  0.16620000   2.27314928
  0.16620000   2.27314728
  0.16620000   2.27314545
  0.16620000   2.27314376
  0.16620000   2.27314220
  0.16620000   2.27314076
  0.16620000   2.27313941
  0.16620000   2.27313816
  0.16620000   2.27313700
  0.16620000   2.27313590
  0.16620000   2.27313488
  0.16620000   2.27313391
  0.16620000   2.27313301
  0.16620000   2.27313215
  0.16620000   2.27313134
  0.16620000   2.27313058
  0.16620000   2.27312985
  0.16620000   2.27312916
  0.16620000   2.27312850
  0.16620000   2.27312788
  0.16620000   2.27312729
  0.16640000   2.27369823
  0.16640000   2.27369582
  0.16640000   2.27369362
  0.16640000   2.27369162
  0.16640000   2.27368979
  0.16640000   2.27368810
  0.16640000   2.27368654
  0.16640000   2.27368509
  0.16640000   2.27368375
  0.16640000   2.27368250
  0.16640000   2.27368133
  0.16640000   2.27368024
  0.16640000   2.27367921
  0.16640000   2.27367824
  0.16640000   2.27367734
  0.16640000   2.27367648
  0.16640000   2.27367567
  0.16640000   2.27367490
  0.16640000   2.27367418
  0.16640000   2.27367348
  0.16640000   2.27367283
  0.16640000   2.27367220
  0.16640000   2.27367161
  0.16660000   2.27423948
  0.16660000   2.27423707
  0.16660000   2.27423488
  0.16660000   2.27423288
  0.16660000   2.27423104
  0.16660000   2.27422935
  0.16660000   2.27422779
  0.16660000   2.27422634
  0.16660000   2.27422500
  0.16660000   2.27422374
  0.16660000   2.27422257
  0.16660000   2.27422148
  0.16660000   2.27422045
  0.16660000   2.27421949
  0.16660000   2.27421858
  0.16660000   2.27421772
  0.16660000   2.27421691
  0.16660000   2.27421614
  0.16660000   2.27421541
  0.16660000   2.27421472
  0.16660000   2.27421406
  0.16660000   2.27421344
  0.16660000   2.27421284
  0.16680000   2.27477768
  0.16680000   2.27477526
  0.16680000   2.27477307
  0.16680000   2.27477106
  0.16680000   2.27476923
  0.16680000   2.27476753
  0.16680000   2.27476597
  0.16680000   2.27476453
  0.16680000   2.27476318
  0.16680000   2.27476193
  0.16680000   2.27476076
  0.16680000   2.27475966
  0.16680000   2.27475863
  0.16680000   2.27475766
  0.16680000   2.27475675
  0.16680000   2.27475589
  0.16680000   2.27475508
  0.16680000   2.27475431
  0.16680000   2.27475358
  0.16680000   2.27475289
  0.16680000   2.27475223
  0.16680000   2.27475161
  0.16680000   2.27475101
  0.16700000   2.27531283
  0.16700000   2.27531042
  0.16700000   2.27530822
  0.16700000   2.27530622
  0.16700000   2.27530438
  0.16700000   2.27530268
  0.16700000   2.27530112
  0.16700000   2.27529967
  0.16700000   2.27529833
  0.16700000   2.27529707
  0.16700000   2.27529590
  0.16700000   2.27529480
  0.16700000   2.27529377
  0.16700000   2.27529280
  0.16700000   2.27529189
  0.16700000   2.27529103
  0.16700000   2.27529022
  0.16700000   2.27528945
  0.16700000   2.27528872
  0.16700000   2.27528803
  0.16700000   2.27528737
  0.16700000   2.27528674
  0.16700000   2.27528614
  0.16720000   2.27584497
  0.16720000   2.27584256
  0.16720000   2.27584036
  0.16720000   2.27583835
  0.16720000   2.27583651
  0.16720000   2.27583482
  0.16720000   2.27583325
  0.16720000   2.27583181
  0.16720000   2.27583046
  0.16720000   2.27582920
  0.16720000   2.27582803
  0.16720000   2.27582693
  0.16720000   2.27582590
  0.16720000   2.27582493
  0.16720000   2.27582402
  0.16720000   2.27582316
  0.16720000   2.27582234
  0.16720000   2.27582157
  0.16720000   2.27582084
  0.16720000   2.27582015
  0.16720000   2.27581949
  0.16720000   2.27581886
  0.16720000   2.27581826
  0.16740000   2.27637413
  0.16740000   2.27637171
  0.16740000   2.27636951
  0.16740000   2.27636751
  0.16740000   2.27636566
  0.16740000   2.27636397
  0.16740000   2.27636240
  0.16740000   2.27636095
  0.16740000   2.27635960
  0.16740000   2.27635834
  0.16740000   2.27635717
  0.16740000   2.27635607
  0.16740000   2.27635504
  0.16740000   2.27635407
  0.16740000   2.27635316
  0.16740000   2.27635229
  0.16740000   2.27635148
  0.16740000   2.27635071
  0.16740000   2.27634998
  0.16740000   2.27634928
  0.16740000   2.27634862
  0.16740000   2.27634799
  0.16740000   2.27634739
  0.16760000   2.27690032
  0.16760000   2.27689790
  0.16760000   2.27689570
  0.16760000   2.27689369
  0.16760000   2.27689185
  0.16760000   2.27689015
  0.16760000   2.27688859
  0.16760000   2.27688713
  0.16760000   2.27688578
  0.16760000   2.27688453
  0.16760000   2.27688335
  0.16760000   2.27688225
  0.16760000   2.27688122
  0.16760000   2.27688024
  0.16760000   2.27687933
  0.16760000   2.27687847
  0.16760000   2.27687765
  0.16760000   2.27687688
  0.16760000   2.27687615
  0.16760000   2.27687545
  0.16760000   2.27687479
  0.16760000   2.27687416
  0.16760000   2.27687356
  0.16780000   2.27742357
  0.16780000   2.27742115
  0.16780000   2.27741895
  0.16780000   2.27741694
  0.16780000   2.27741510
  0.16780000   2.27741340
  0.16780000   2.27741183
  0.16780000   2.27741038
  0.16780000   2.27740902
  0.16780000   2.27740777
  0.16780000   2.27740659
  0.16780000   2.27740549
  0.16780000   2.27740445
  0.16780000   2.27740348
  0.16780000   2.27740257
  0.16780000   2.27740170
  0.16780000   2.27740089
  0.16780000   2.27740011
  0.16780000   2.27739938
  0.16780000   2.27739868
  0.16780000   2.27739802
  0.16780000   2.27739739
  0.16780000   2.27739679
  0.16800000   2.27794391
  0.16800000   2.27794149
  0.16800000   2.27793928
  0.16800000   2.27793727
  0.16800000   2.27793543
  0.16800000   2.27793373
  0.16800000   2.27793216
  0.16800000   2.27793070
  0.16800000   2.27792935
  0.16800000   2.27792809
  0.16800000   2.27792691
  0.16800000   2.27792581
  0.16800000   2.27792478
  0.16800000   2.27792380
  0.16800000   2.27792289
  0.16800000   2.27792202
  0.16800000   2.27792120
  0.16800000   2.27792043
  0.16800000   2.27791969
  0.16800000   2.27791900
  0.16800000   2.27791833
  0.16800000   2.27791770
  0.16800000   2.27791710
  0.16820000   2.27846135
  0.16820000   2.27845893
  0.16820000   2.27845673
  0.16820000   2.27845472
  0.16820000   2.27845287
  0.16820000   2.27845117
  0.16820000   2.27844960
  0.16820000   2.27844814
  0.16820000   2.27844679
  0.16820000   2.27844552
  0.16820000   2.27844435
  0.16820000   2.27844324
  0.16820000   2.27844221
  0.16820000   2.27844123
  0.16820000   2.27844032
  0.16820000   2.27843945
  0.16820000   2.27843863
  0.16820000   2.27843785
  0.16820000   2.27843712
  0.16820000   2.27843642
  0.16820000   2.27843576
  0.16820000   2.27843512
  0.16820000   2.27843452
  0.16840000   2.27897593
  0.16840000   2.27897351
  0.16840000   2.27897130
  0.16840000   2.27896929
  0.16840000   2.27896744
  0.16840000   2.27896574
  0.16840000   2.27896417
  0.16840000   2.27896271
  0.16840000   2.27896135
  0.16840000   2.27896009
  0.16840000   2.27895891
  0.16840000   2.27895781
  0.16840000   2.27895677
  0.16840000   2.27895579
  0.16840000   2.27895488
  0.16840000   2.27895401
  0.16840000   2.27895319
  0.16840000   2.27895241
  0.16840000   2.27895168
  0.16840000   2.27895098
  0.16840000   2.27895031
  0.16840000   2.27894968
  0.16840000   2.27894907
  0.16860000   2.27948766
  0.16860000   2.27948524
  0.16860000   2.27948303
  0.16860000   2.27948102
  0.16860000   2.27947917
  0.16860000   2.27947747
  0.16860000   2.27947589
  0.16860000   2.27947443
  0.16860000   2.27947308
  0.16860000   2.27947181
  0.16860000   2.27947063
  0.16860000   2.27946952
  0.16860000   2.27946849
  0.16860000   2.27946751
  0.16860000   2.27946659
  0.16860000   2.27946572
  0.16860000   2.27946490
  0.16860000   2.27946412
  0.16860000   2.27946339
  0.16860000   2.27946269
  0.16860000   2.27946202
  0.16860000   2.27946139
  0.16860000   2.27946078
  0.16880000   2.27999657
  0.16880000   2.27999414
  0.16880000   2.27999194
  0.16880000   2.27998992
  0.16880000   2.27998807
  0.16880000   2.27998637
  0.16880000   2.27998479
  0.16880000   2.27998333
  0.16880000   2.27998198
  0.16880000   2.27998071
  0.16880000   2.27997953
  0.16880000   2.27997842
  0.16880000   2.27997738
  0.16880000   2.27997640
  0.16880000   2.27997548
  0.16880000   2.27997461
  0.16880000   2.27997379
  0.16880000   2.27997301
  0.16880000   2.27997228
  0.16880000   2.27997158
  0.16880000   2.27997091
  0.16880000   2.27997027
  0.16880000   2.27996967
  0.16900000   2.28050268
  0.16900000   2.28050025
  0.16900000   2.28049805
  0.16900000   2.28049603
  0.16900000   2.28049418
  0.16900000   2.28049247
  0.16900000   2.28049090
  0.16900000   2.28048943
  0.16900000   2.28048808
  0.16900000   2.28048681
  0.16900000   2.28048563
  0.16900000   2.28048452
  0.16900000   2.28048348
  0.16900000   2.28048250
  0.16900000   2.28048158
  0.16900000   2.28048071
  0.16900000   2.28047988
  0.16900000   2.28047910
  0.16900000   2.28047837
  0.16900000   2.28047766
  0.16900000   2.28047700
  0.16900000   2.28047636
  0.16900000   2.28047576
  0.16920000   2.28100601
  0.16920000   2.28100359
  0.16920000   2.28100138
  0.16920000   2.28099936
  0.16920000   2.28099751
  0.16920000   2.28099580
  0.16920000   2.28099422
  0.16920000   2.28099276
  0.16920000   2.28099140
  0.16920000   2.28099013
  0.16920000   2.28098895
  0.16920000   2.28098784
  0.16920000   2.28098680
  0.16920000   2.28098582
  0.16920000   2.28098489
  0.16920000   2.28098402
  0.16920000   2.28098320
  0.16920000   2.28098242
  0.16920000   2.28098168
  0.16920000   2.28098098
  0.16920000   2.28098031
  0.16920000   2.28097967
  0.16920000   2.28097907
  0.16940000   2.28150659
  0.16940000   2.28150416
  0.16940000   2.28150195
  0.16940000   2.28149993
  0.16940000   2.28149808
  0.16940000   2.28149637
  0.16940000   2.28149479
  0.16940000   2.28149333
  0.16940000   2.28149197
  0.16940000   2.28149070
  0.16940000   2.28148951
  0.16940000   2.28148840
  0.16940000   2.28148736
  0.16940000   2.28148638
  0.16940000   2.28148546
  0.16940000   2.28148458
  0.16940000   2.28148376
  0.16940000   2.28148298
  0.16940000   2.28148224
  0.16940000   2.28148153
  0.16940000   2.28148087
  0.16940000   2.28148023
  0.16940000   2.28147962
  0.16960000   2.28200444
  0.16960000   2.28200201
  0.16960000   2.28199980
  0.16960000   2.28199778
  0.16960000   2.28199592
  0.16960000   2.28199421
  0.16960000   2.28199263
  0.16960000   2.28199117
  0.16960000   2.28198981
  0.16960000   2.28198853
  0.16960000   2.28198735
  0.16960000   2.28198624
  0.16960000   2.28198519
  0.16960000   2.28198421
  0.16960000   2.28198329
  0.16960000   2.28198241
  0.16960000   2.28198159
  0.16960000   2.28198080
  0.16960000   2.28198006
  0.16960000   2.28197936
  0.16960000   2.28197869
  0.16960000   2.28197805
  0.16960000   2.28197744
  0.16980000   2.28249957
  0.16980000   2.28249714
  0.16980000   2.28249493
  0.16980000   2.28249291
  0.16980000   2.28249105
  0.16980000   2.28248934
  0.16980000   2.28248776
  0.16980000   2.28248629
  0.16980000   2.28248493
  0.16980000   2.28248366
  0.16980000   2.28248247
  0.16980000   2.28248136
  0.16980000   2.28248031
  0.16980000   2.28247933
  0.16980000   2.28247840
  0.16980000   2.28247753
  0.16980000   2.28247670
  0.16980000   2.28247592
  0.16980000   2.28247518
  0.16980000   2.28247447
  0.16980000   2.28247380
  0.16980000   2.28247316
  0.16980000   2.28247255
  0.17000000   2.28299202
  0.17000000   2.28298959
  0.17000000   2.28298737
  0.17000000   2.28298535
  0.17000000   2.28298349
  0.17000000   2.28298178
  0.17000000   2.28298020
  0.17000000   2.28297873
  0.17000000   2.28297736
  0.17000000   2.28297609
  0.17000000   2.28297490
  0.17000000   2.28297379
  0.17000000   2.28297274
  0.17000000   2.28297176
  0.17000000   2.28297083
  0.17000000   2.28296996
  0.17000000   2.28296913
  0.17000000   2.28296835
  0.17000000   2.28296760
  0.17000000   2.28296690
  0.17000000   2.28296622
  0.17000000   2.28296558
  0.17000000   2.28296497
  0.17020000   2.28348179
  0.17020000   2.28347936
  0.17020000   2.28347715
  0.17020000   2.28347512
  0.17020000   2.28347326
  0.17020000   2.28347155
  0.17020000   2.28346997
  0.17020000   2.28346850
  0.17020000   2.28346713
  0.17020000   2.28346586
  0.17020000   2.28346467
  0.17020000   2.28346355
  0.17020000   2.28346250
  0.17020000   2.28346152
  0.17020000   2.28346059
  0.17020000   2.28345971
  0.17020000   2.28345889
  0.17020000   2.28345810
  0.17020000   2.28345736
  0.17020000   2.28345665
  0.17020000   2.28345598
  0.17020000   2.28345534
  0.17020000   2.28345473
  0.17040000   2.28396892
  0.17040000   2.28396649
  0.17040000   2.28396427
  0.17040000   2.28396225
  0.17040000   2.28396039
  0.17040000   2.28395867
  0.17040000   2.28395709
  0.17040000   2.28395562
  0.17040000   2.28395425
  0.17040000   2.28395297
  0.17040000   2.28395178
  0.17040000   2.28395067
  0.17040000   2.28394962
  0.17040000   2.28394863
  0.17040000   2.28394770
  0.17040000   2.28394683
  0.17040000   2.28394600
  0.17040000   2.28394521
  0.17040000   2.28394447
  0.17040000   2.28394376
  0.17040000   2.28394308
  0.17040000   2.28394244
  0.17040000   2.28394183
  0.17060000   2.28445342
  0.17060000   2.28445099
  0.17060000   2.28444877
  0.17060000   2.28444675
  0.17060000   2.28444488
  0.17060000   2.28444317
  0.17060000   2.28444158
  0.17060000   2.28444011
  0.17060000   2.28443874
  0.17060000   2.28443746
  0.17060000   2.28443627
  0.17060000   2.28443516
  0.17060000   2.28443411
  0.17060000   2.28443312
  0.17060000   2.28443219
  0.17060000   2.28443131
  0.17060000   2.28443048
  0.17060000   2.28442969
  0.17060000   2.28442895
  0.17060000   2.28442824
  0.17060000   2.28442756
  0.17060000   2.28442692
  0.17060000   2.28442631
  0.17080000   2.28493532
  0.17080000   2.28493288
  0.17080000   2.28493067
  0.17080000   2.28492864
  0.17080000   2.28492677
  0.17080000   2.28492506
  0.17080000   2.28492347
  0.17080000   2.28492200
  0.17080000   2.28492063
  0.17080000   2.28491935
  0.17080000   2.28491816
  0.17080000   2.28491704
  0.17080000   2.28491599
  0.17080000   2.28491500
  0.17080000   2.28491407
  0.17080000   2.28491319
  0.17080000   2.28491236
  0.17080000   2.28491157
  0.17080000   2.28491082
  0.17080000   2.28491011
  0.17080000   2.28490944
  0.17080000   2.28490879
  0.17080000   2.28490818
  0.17100000   2.28541463
  0.17100000   2.28541219
  0.17100000   2.28540997
  0.17100000   2.28540794
  0.17100000   2.28540608
  0.17100000   2.28540436
  0.17100000   2.28540277
  0.17100000   2.28540130
  0.17100000   2.28539993
  0.17100000   2.28539865
  0.17100000   2.28539745
  0.17100000   2.28539633
  0.17100000   2.28539528
  0.17100000   2.28539429
  0.17100000   2.28539336
  0.17100000   2.28539248
  0.17100000   2.28539165
  0.17100000   2.28539086
  0.17100000   2.28539011
  0.17100000   2.28538940
  0.17100000   2.28538873
  0.17100000   2.28538808
  0.17100000   2.28538747
  0.17120000   2.28589137
  0.17120000   2.28588894
  0.17120000   2.28588672
  0.17120000   2.28588468
  0.17120000   2.28588282
  0.17120000   2.28588110
  0.17120000   2.28587951
  0.17120000   2.28587803
  0.17120000   2.28587666
  0.17120000   2.28587538
  0.17120000   2.28587419
  0.17120000   2.28587306
  0.17120000   2.28587201
  0.17120000   2.28587102
  0.17120000   2.28587009
  0.17120000   2.28586921
  0.17120000   2.28586837
  0.17120000   2.28586758
  0.17120000   2.28586683
  0.17120000   2.28586612
  0.17120000   2.28586545
  0.17120000   2.28586480
  0.17120000   2.28586419
  0.17140000   2.28636557
  0.17140000   2.28636313
  0.17140000   2.28636091
  0.17140000   2.28635888
  0.17140000   2.28635701
  0.17140000   2.28635529
  0.17140000   2.28635370
  0.17140000   2.28635222
  0.17140000   2.28635085
  0.17140000   2.28634957
  0.17140000   2.28634837
  0.17140000   2.28634725
  0.17140000   2.28634619
  0.17140000   2.28634520
  0.17140000   2.28634427
  0.17140000   2.28634339
  0.17140000   2.28634255
  0.17140000   2.28634176
  0.17140000   2.28634101
  0.17140000   2.28634030
  0.17140000   2.28633962
  0.17140000   2.28633898
  0.17140000   2.28633836
  0.17160000   2.28683724
  0.17160000   2.28683480
  0.17160000   2.28683258
  0.17160000   2.28683055
  0.17160000   2.28682868
  0.17160000   2.28682696
  0.17160000   2.28682536
  0.17160000   2.28682388
  0.17160000   2.28682251
  0.17160000   2.28682123
  0.17160000   2.28682003
  0.17160000   2.28681891
  0.17160000   2.28681785
  0.17160000   2.28681686
  0.17160000   2.28681592
  0.17160000   2.28681504
  0.17160000   2.28681421
  0.17160000   2.28681341
  0.17160000   2.28681266
  0.17160000   2.28681195
  0.17160000   2.28681127
  0.17160000   2.28681062
  0.17160000   2.28681001
  0.17180000   2.28730641
  0.17180000   2.28730397
  0.17180000   2.28730174
  0.17180000   2.28729971
  0.17180000   2.28729784
  0.17180000   2.28729611
  0.17180000   2.28729452
  0.17180000   2.28729304
  0.17180000   2.28729166
  0.17180000   2.28729038
  0.17180000   2.28728918
  0.17180000   2.28728806
  0.17180000   2.28728700
  0.17180000   2.28728601
  0.17180000   2.28728507
  0.17180000   2.28728419
  0.17180000   2.28728335
  0.17180000   2.28728256
  0.17180000   2.28728181
  0.17180000   2.28728109
  0.17180000   2.28728041
  0.17180000   2.28727977
  0.17180000   2.28727915
  0.17200000   2.28777309
  0.17200000   2.28777064
  0.17200000   2.28776842
  0.17200000   2.28776638
  0.17200000   2.28776451
  0.17200000   2.28776279
  0.17200000   2.28776119
  0.17200000   2.28775971
  0.17200000   2.28775833
  0.17200000   2.28775705
  0.17200000   2.28775584
  0.17200000   2.28775472
  0.17200000   2.28775366
  0.17200000   2.28775267
  0.17200000   2.28775173
  0.17200000   2.28775085
  0.17200000   2.28775001
  0.17200000   2.28774922
  0.17200000   2.28774846
  0.17200000   2.28774775
  0.17200000   2.28774707
  0.17200000   2.28774642
  0.17200000   2.28774580
  0.17220000   2.28823729
  0.17220000   2.28823485
  0.17220000   2.28823262
  0.17220000   2.28823059
  0.17220000   2.28822871
  0.17220000   2.28822699
  0.17220000   2.28822539
  0.17220000   2.28822391
  0.17220000   2.28822253
  0.17220000   2.28822124
  0.17220000   2.28822004
  0.17220000   2.28821891
  0.17220000   2.28821786
  0.17220000   2.28821686
  0.17220000   2.28821592
  0.17220000   2.28821504
  0.17220000   2.28821420
  0.17220000   2.28821340
  0.17220000   2.28821265
  0.17220000   2.28821194
  0.17220000   2.28821125
  0.17220000   2.28821061
  0.17220000   2.28820999
  0.17240000   2.28869905
  0.17240000   2.28869661
  0.17240000   2.28869438
  0.17240000   2.28869234
  0.17240000   2.28869047
  0.17240000   2.28868874
  0.17240000   2.28868714
  0.17240000   2.28868566
  0.17240000   2.28868428
  0.17240000   2.28868299
  0.17240000   2.28868179
  0.17240000   2.28868066
  0.17240000   2.28867960
  0.17240000   2.28867860
  0.17240000   2.28867766
  0.17240000   2.28867678
  0.17240000   2.28867594
  0.17240000   2.28867514
  0.17240000   2.28867439
  0.17240000   2.28867367
  0.17240000   2.28867299
  0.17240000   2.28867234
  0.17240000   2.28867172
  0.17260000   2.28915838
  0.17260000   2.28915594
  0.17260000   2.28915371
  0.17260000   2.28915166
  0.17260000   2.28914979
  0.17260000   2.28914806
  0.17260000   2.28914646
  0.17260000   2.28914498
  0.17260000   2.28914360
  0.17260000   2.28914231
  0.17260000   2.28914110
  0.17260000   2.28913997
  0.17260000   2.28913891
  0.17260000   2.28913792
  0.17260000   2.28913698
  0.17260000   2.28913609
  0.17260000   2.28913525
  0.17260000   2.28913445
  0.17260000   2.28913370
  0.17260000   2.28913298
  0.17260000   2.28913230
  0.17260000   2.28913165
  0.17260000   2.28913103
  0.17280000   2.28961530
  0.17280000   2.28961285
  0.17280000   2.28961062
  0.17280000   2.28960858
  0.17280000   2.28960670
  0.17280000   2.28960497
  0.17280000   2.28960337
  0.17280000   2.28960188
  0.17280000   2.28960050
  0.17280000   2.28959921
  0.17280000   2.28959801
  0.17280000   2.28959688
  0.17280000   2.28959581
  0.17280000   2.28959482
  0.17280000   2.28959387
  0.17280000   2.28959298
  0.17280000   2.28959214
  0.17280000   2.28959135
  0.17280000   2.28959059
  0.17280000   2.28958987
  0.17280000   2.28958919
  0.17280000   2.28958854
  0.17280000   2.28958792
  0.17300000   2.29006982
  0.17300000   2.29006737
  0.17300000   2.29006514
  0.17300000   2.29006310
  0.17300000   2.29006122
  0.17300000   2.29005948
  0.17300000   2.29005788
  0.17300000   2.29005640
  0.17300000   2.29005501
  0.17300000   2.29005372
  0.17300000   2.29005251
  0.17300000   2.29005138
  0.17300000   2.29005032
  0.17300000   2.29004932
  0.17300000   2.29004838
  0.17300000   2.29004749
  0.17300000   2.29004664
  0.17300000   2.29004585
  0.17300000   2.29004509
  0.17300000   2.29004437
  0.17300000   2.29004369
  0.17300000   2.29004303
  0.17300000   2.29004241
  0.17320000   2.29052196
  0.17320000   2.29051952
  0.17320000   2.29051728
  0.17320000   2.29051524
  0.17320000   2.29051336
  0.17320000   2.29051162
  0.17320000   2.29051002
  0.17320000   2.29050853
  0.17320000   2.29050715
  0.17320000   2.29050585
  0.17320000   2.29050465
  0.17320000   2.29050351
  0.17320000   2.29050245
  0.17320000   2.29050145
  0.17320000   2.29050051
  0.17320000   2.29049961
  0.17320000   2.29049877
  0.17320000   2.29049797
  0.17320000   2.29049721
  0.17320000   2.29049649
  0.17320000   2.29049581
  0.17320000   2.29049516
  0.17320000   2.29049453
  0.17340000   2.29097175
  0.17340000   2.29096930
  0.17340000   2.29096706
  0.17340000   2.29096502
  0.17340000   2.29096314
  0.17340000   2.29096140
  0.17340000   2.29095980
  0.17340000   2.29095831
  0.17340000   2.29095692
  0.17340000   2.29095563
  0.17340000   2.29095442
  0.17340000   2.29095329
  0.17340000   2.29095222
  0.17340000   2.29095122
  0.17340000   2.29095027
  0.17340000   2.29094938
  0.17340000   2.29094854
  0.17340000   2.29094774
  0.17340000   2.29094698
  0.17340000   2.29094626
  0.17340000   2.29094557
  0.17340000   2.29094492
  0.17340000   2.29094430
  0.17360000   2.29141919
  0.17360000   2.29141675
  0.17360000   2.29141451
  0.17360000   2.29141246
  0.17360000   2.29141058
  0.17360000   2.29140884
  0.17360000   2.29140724
  0.17360000   2.29140575
  0.17360000   2.29140436
  0.17360000   2.29140306
  0.17360000   2.29140185
  0.17360000   2.29140072
  0.17360000   2.29139965
  0.17360000   2.29139865
  0.17360000   2.29139770
  0.17360000   2.29139681
  0.17360000   2.29139596
  0.17360000   2.29139516
  0.17360000   2.29139441
  0.17360000   2.29139368
  0.17360000   2.29139300
  0.17360000   2.29139234
  0.17360000   2.29139172
  0.17380000   2.29186432
  0.17380000   2.29186187
  0.17380000   2.29185963
  0.17380000   2.29185758
  0.17380000   2.29185570
  0.17380000   2.29185396
  0.17380000   2.29185235
  0.17380000   2.29185086
  0.17380000   2.29184947
  0.17380000   2.29184818
  0.17380000   2.29184696
  0.17380000   2.29184583
  0.17380000   2.29184476
  0.17380000   2.29184376
  0.17380000   2.29184281
  0.17380000   2.29184192
  0.17380000   2.29184107
  0.17380000   2.29184027
  0.17380000   2.29183951
  0.17380000   2.29183878
  0.17380000   2.29183810
  0.17380000   2.29183744
  0.17380000   2.29183682
  0.17400000   2.29230713
  0.17400000   2.29230469
  0.17400000   2.29230244
  0.17400000   2.29230039
  0.17400000   2.29229851
  0.17400000   2.29229677
  0.17400000   2.29229516
  0.17400000   2.29229367
  0.17400000   2.29229228
  0.17400000   2.29229098
  0.17400000   2.29228977
  0.17400000   2.29228863
  0.17400000   2.29228756
  0.17400000   2.29228656
  0.17400000   2.29228561
  0.17400000   2.29228471
  0.17400000   2.29228387
  0.17400000   2.29228306
  0.17400000   2.29228230
  0.17400000   2.29228158
  0.17400000   2.29228089
  0.17400000   2.29228024
  0.17400000   2.29227961
  0.17420000   2.29274766
  0.17420000   2.29274522
  0.17420000   2.29274297
  0.17420000   2.29274092
  0.17420000   2.29273903
  0.17420000   2.29273729
  0.17420000   2.29273568
  0.17420000   2.29273419
  0.17420000   2.29273280
  0.17420000   2.29273150
  0.17420000   2.29273028
  0.17420000   2.29272915
  0.17420000   2.29272808
  0.17420000   2.29272707
  0.17420000   2.29272612
  0.17420000   2.29272522
  0.17420000   2.29272438
  0.17420000   2.29272357
  0.17420000   2.29272281
  0.17420000   2.29272208
  0.17420000   2.29272140
  0.17420000   2.29272074
  0.17420000   2.29272011
  0.17440000   2.29318592
  0.17440000   2.29318347
  0.17440000   2.29318122
  0.17440000   2.29317917
  0.17440000   2.29317728
  0.17440000   2.29317554
  0.17440000   2.29317393
  0.17440000   2.29317244
  0.17440000   2.29317104
  0.17440000   2.29316974
  0.17440000   2.29316853
  0.17440000   2.29316739
  0.17440000   2.29316632
  0.17440000   2.29316531
  0.17440000   2.29316436
  0.17440000   2.29316346
  0.17440000   2.29316261
  0.17440000   2.29316181
  0.17440000   2.29316105
  0.17440000   2.29316032
  0.17440000   2.29315963
  0.17440000   2.29315897
  0.17440000   2.29315835
  0.17460000   2.29362192
  0.17460000   2.29361948
  0.17460000   2.29361722
  0.17460000   2.29361517
  0.17460000   2.29361328
  0.17460000   2.29361154
  0.17460000   2.29360993
  0.17460000   2.29360843
  0.17460000   2.29360703
  0.17460000   2.29360573
  0.17460000   2.29360452
  0.17460000   2.29360338
  0.17460000   2.29360230
  0.17460000   2.29360130
  0.17460000   2.29360035
  0.17460000   2.29359945
  0.17460000   2.29359860
  0.17460000   2.29359779
  0.17460000   2.29359703
  0.17460000   2.29359630
  0.17460000   2.29359561
  0.17460000   2.29359495
  0.17460000   2.29359432
  0.17480000   2.29405568
  0.17480000   2.29405324
  0.17480000   2.29405099
  0.17480000   2.29404893
  0.17480000   2.29404704
  0.17480000   2.29404530
  0.17480000   2.29404368
  0.17480000   2.29404218
  0.17480000   2.29404079
  0.17480000   2.29403949
  0.17480000   2.29403827
  0.17480000   2.29403713
  0.17480000   2.29403605
  0.17480000   2.29403504
  0.17480000   2.29403409
  0.17480000   2.29403319
  0.17480000   2.29403234
  0.17480000   2.29403154
  0.17480000   2.29403077
  0.17480000   2.29403004
  0.17480000   2.29402935
  0.17480000   2.29402869
  0.17480000   2.29402806
  0.17500000   2.29448722
  0.17500000   2.29448478
  0.17500000   2.29448253
  0.17500000   2.29448047
  0.17500000   2.29447858
  0.17500000   2.29447683
  0.17500000   2.29447522
  0.17500000   2.29447372
  0.17500000   2.29447232
  0.17500000   2.29447102
  0.17500000   2.29446980
  0.17500000   2.29446866
  0.17500000   2.29446758
  0.17500000   2.29446657
  0.17500000   2.29446562
  0.17500000   2.29446472
  0.17500000   2.29446387
  0.17500000   2.29446306
  0.17500000   2.29446229
  0.17500000   2.29446156
  0.17500000   2.29446087
  0.17500000   2.29446021
  0.17500000   2.29445958
  0.17520000   2.29491656
  0.17520000   2.29491412
  0.17520000   2.29491186
  0.17520000   2.29490981
  0.17520000   2.29490791
  0.17520000   2.29490616
  0.17520000   2.29490455
  0.17520000   2.29490304
  0.17520000   2.29490165
  0.17520000   2.29490034
  0.17520000   2.29489912
  0.17520000   2.29489798
  0.17520000   2.29489690
  0.17520000   2.29489589
  0.17520000   2.29489494
  0.17520000   2.29489404
  0.17520000   2.29489318
  0.17520000   2.29489237
  0.17520000   2.29489161
  0.17520000   2.29489088
  0.17520000   2.29489019
  0.17520000   2.29488953
  0.17520000   2.29488890
  0.17540000   2.29534371
  0.17540000   2.29534127
  0.17540000   2.29533901
  0.17540000   2.29533695
  0.17540000   2.29533505
  0.17540000   2.29533331
  0.17540000   2.29533169
  0.17540000   2.29533018
  0.17540000   2.29532879
  0.17540000   2.29532748
  0.17540000   2.29532626
  0.17540000   2.29532511
  0.17540000   2.29532404
  0.17540000   2.29532302
  0.17540000   2.29532207
  0.17540000   2.29532117
  0.17540000   2.29532031
  0.17540000   2.29531950
  0.17540000   2.29531873
  0.17540000   2.29531801
  0.17540000   2.29531731
  0.17540000   2.29531665
  0.17540000   2.29531602
  0.17560000   2.29576868
  0.17560000   2.29576624
  0.17560000   2.29576398
  0.17560000   2.29576192
  0.17560000   2.29576002
  0.17560000   2.29575827
  0.17560000   2.29575665
  0.17560000   2.29575515
  0.17560000   2.29575375
  0.17560000   2.29575244
  0.17560000   2.29575122
  0.17560000   2.29575007
  0.17560000   2.29574900
  0.17560000   2.29574798
  0.17560000   2.29574703
  0.17560000   2.29574612
  0.17560000   2.29574527
  0.17560000   2.29574446
  0.17560000   2.29574369
  0.17560000   2.29574296
  0.17560000   2.29574226
  0.17560000   2.29574160
  0.17560000   2.29574097
  0.17580000   2.29619150
  0.17580000   2.29618906
  0.17580000   2.29618679
  0.17580000   2.29618474
  0.17580000   2.29618284
  0.17580000   2.29618109
  0.17580000   2.29617946
  0.17580000   2.29617796
  0.17580000   2.29617656
  0.17580000   2.29617525
  0.17580000   2.29617403
  0.17580000   2.29617288
  0.17580000   2.29617180
  0.17580000   2.29617078
  0.17580000   2.29616983
  0.17580000   2.29616892
  0.17580000   2.29616807
  0.17580000   2.29616726
  0.17580000   2.29616649
  0.17580000   2.29616575
  0.17580000   2.29616506
  0.17580000   2.29616440
  0.17580000   2.29616376
  0.17600000   2.29661218
  0.17600000   2.29660974
  0.17600000   2.29660747
  0.17600000   2.29660541
  0.17600000   2.29660351
  0.17600000   2.29660176
  0.17600000   2.29660013
  0.17600000   2.29659863
  0.17600000   2.29659722
  0.17600000   2.29659591
  0.17600000   2.29659469
  0.17600000   2.29659354
  0.17600000   2.29659246
  0.17600000   2.29659144
  0.17600000   2.29659049
  0.17600000   2.29658958
  0.17600000   2.29658872
  0.17600000   2.29658791
  0.17600000   2.29658714
  0.17600000   2.29658641
  0.17600000   2.29658571
  0.17600000   2.29658505
  0.17600000   2.29658442
  0.17620000   2.29703072
  0.17620000   2.29702829
  0.17620000   2.29702602
  0.17620000   2.29702396
  0.17620000   2.29702205
  0.17620000   2.29702030
  0.17620000   2.29701868
  0.17620000   2.29701717
  0.17620000   2.29701576
  0.17620000   2.29701445
  0.17620000   2.29701323
  0.17620000   2.29701208
  0.17620000   2.29701100
  0.17620000   2.29700998
  0.17620000   2.29700902
  0.17620000   2.29700811
  0.17620000   2.29700726
  0.17620000   2.29700644
  0.17620000   2.29700567
  0.17620000   2.29700494
  0.17620000   2.29700424
  0.17620000   2.29700357
  0.17620000   2.29700294
  0.17640000   2.29744716
  0.17640000   2.29744473
  0.17640000   2.29744245
  0.17640000   2.29744039
  0.17640000   2.29743849
  0.17640000   2.29743673
  0.17640000   2.29743511
  0.17640000   2.29743360
  0.17640000   2.29743219
  0.17640000   2.29743088
  0.17640000   2.29742965
  0.17640000   2.29742850
  0.17640000   2.29742742
  0.17640000   2.29742640
  0.17640000   2.29742544
  0.17640000   2.29742453
  0.17640000   2.29742367
  0.17640000   2.29742286
  0.17640000   2.29742209
  0.17640000   2.29742136
  0.17640000   2.29742066
  0.17640000   2.29741999
  0.17640000   2.29741936
  0.17660000   2.29786151
  0.17660000   2.29785907
  0.17660000   2.29785679
  0.17660000   2.29785473
  0.17660000   2.29785283
  0.17660000   2.29785107
  0.17660000   2.29784944
  0.17660000   2.29784793
  0.17660000   2.29784653
  0.17660000   2.29784521
  0.17660000   2.29784398
  0.17660000   2.29784283
  0.17660000   2.29784175
  0.17660000   2.29784073
  0.17660000   2.29783977
  0.17660000   2.29783886
  0.17660000   2.29783800
  0.17660000   2.29783718
  0.17660000   2.29783641
  0.17660000   2.29783568
  0.17660000   2.29783498
  0.17660000   2.29783431
  0.17660000   2.29783368
  0.17680000   2.29827377
  0.17680000   2.29827134
  0.17680000   2.29826906
  0.17680000   2.29826700
  0.17680000   2.29826509
  0.17680000   2.29826333
  0.17680000   2.29826170
  0.17680000   2.29826019
  0.17680000   2.29825878
  0.17680000   2.29825746
  0.17680000   2.29825623
  0.17680000   2.29825508
  0.17680000   2.29825400
  0.17680000   2.29825298
  0.17680000   2.29825201
  0.17680000   2.29825111
  0.17680000   2.29825024
  0.17680000   2.29824943
  0.17680000   2.29824865
  0.17680000   2.29824792
  0.17680000   2.29824722
  0.17680000   2.29824655
  0.17680000   2.29824591
  0.17700000   2.29868397
  0.17700000   2.29868153
  0.17700000   2.29867925
  0.17700000   2.29867719
  0.17700000   2.29867528
  0.17700000   2.29867352
  0.17700000   2.29867189
  0.17700000   2.29867038
  0.17700000   2.29866897
  0.17700000   2.29866765
  0.17700000   2.29866642
  0.17700000   2.29866527
  0.17700000   2.29866418
  0.17700000   2.29866316
  0.17700000   2.29866220
  0.17700000   2.29866128
  0.17700000   2.29866042
  0.17700000   2.29865961
  0.17700000   2.29865883
  0.17700000   2.29865810
  0.17700000   2.29865739
  0.17700000   2.29865673
  0.17700000   2.29865609
  0.17720000   2.29909213
  0.17720000   2.29908968
  0.17720000   2.29908740
  0.17720000   2.29908533
  0.17720000   2.29908342
  0.17720000   2.29908166
  0.17720000   2.29908003
  0.17720000   2.29907852
  0.17720000   2.29907710
  0.17720000   2.29907579
  0.17720000   2.29907456
  0.17720000   2.29907340
  0.17720000   2.29907231
  0.17720000   2.29907129
  0.17720000   2.29907032
  0.17720000   2.29906941
  0.17720000   2.29906855
  0.17720000   2.29906773
  0.17720000   2.29906696
  0.17720000   2.29906622
  0.17720000   2.29906552
  0.17720000   2.29906485
  0.17720000   2.29906421
  0.17740000   2.29949824
  0.17740000   2.29949579
  0.17740000   2.29949351
  0.17740000   2.29949144
  0.17740000   2.29948953
  0.17740000   2.29948777
  0.17740000   2.29948613
  0.17740000   2.29948462
  0.17740000   2.29948321
  0.17740000   2.29948189
  0.17740000   2.29948065
  0.17740000   2.29947950
  0.17740000   2.29947841
  0.17740000   2.29947739
  0.17740000   2.29947642
  0.17740000   2.29947551
  0.17740000   2.29947464
  0.17740000   2.29947383
  0.17740000   2.29947305
  0.17740000   2.29947231
  0.17740000   2.29947161
  0.17740000   2.29947094
  0.17740000   2.29947030
  0.17760000   2.29990234
  0.17760000   2.29989988
  0.17760000   2.29989760
  0.17760000   2.29989553
  0.17760000   2.29989361
  0.17760000   2.29989185
  0.17760000   2.29989022
  0.17760000   2.29988870
  0.17760000   2.29988728
  0.17760000   2.29988597
  0.17760000   2.29988473
  0.17760000   2.29988357
  0.17760000   2.29988248
  0.17760000   2.29988146
  0.17760000   2.29988049
  0.17760000   2.29987958
  0.17760000   2.29987871
  0.17760000   2.29987790
  0.17760000   2.29987712
  0.17760000   2.29987638
  0.17760000   2.29987567
  0.17760000   2.29987500
  0.17760000   2.29987436
  0.17780000   2.30030443
  0.17780000   2.30030196
  0.17780000   2.30029968
  0.17780000   2.30029761
  0.17780000   2.30029569
  0.17780000   2.30029393
  0.17780000   2.30029229
  0.17780000   2.30029077
  0.17780000   2.30028936
  0.17780000   2.30028804
  0.17780000   2.30028680
  0.17780000   2.30028564
  0.17780000   2.30028455
  0.17780000   2.30028353
  0.17780000   2.30028256
  0.17780000   2.30028164
  0.17780000   2.30028078
  0.17780000   2.30027996
  0.17780000   2.30027918
  0.17780000   2.30027844
  0.17780000   2.30027773
  0.17780000   2.30027706
  0.17780000   2.30027642
  0.17800000   2.30070453
  0.17800000   2.30070204
  0.17800000   2.30069977
  0.17800000   2.30069769
  0.17800000   2.30069578
  0.17800000   2.30069401
  0.17800000   2.30069237
  0.17800000   2.30069085
  0.17800000   2.30068944
  0.17800000   2.30068812
  0.17800000   2.30068688
  0.17800000   2.30068572
  0.17800000   2.30068463
  0.17800000   2.30068360
  0.17800000   2.30068263
  0.17800000   2.30068172
  0.17800000   2.30068085
  0.17800000   2.30068003
  0.17800000   2.30067925
  0.17800000   2.30067851
  0.17800000   2.30067780
  0.17800000   2.30067713
  0.17800000   2.30067649
  0.17820000   2.30110266
  0.17820000   2.30110014
  0.17820000   2.30109789
  0.17820000   2.30109580
  0.17820000   2.30109389
  0.17820000   2.30109211
  0.17820000   2.30109048
  0.17820000   2.30108895
  0.17820000   2.30108754
  0.17820000   2.30108621
  0.17820000   2.30108498
  0.17820000   2.30108381
  0.17820000   2.30108272
  0.17820000   2.30108169
  0.17820000   2.30108072
  0.17820000   2.30107981
  0.17820000   2.30107894
  0.17820000   2.30107812
  0.17820000   2.30107734
  0.17820000   2.30107660
  0.17820000   2.30107589
  0.17820000   2.30107522
  0.17820000   2.30107457
  0.17840000   2.30149883
  0.17840000   2.30149628
  0.17840000   2.30149404
  0.17840000   2.30149194
  0.17840000   2.30149003
  0.17840000   2.30148825
  0.17840000   2.30148662
  0.17840000   2.30148509
  0.17840000   2.30148367
  0.17840000   2.30148235
  0.17840000   2.30148111
  0.17840000   2.30147995
  0.17840000   2.30147885
  0.17840000   2.30147782
  0.17840000   2.30147685
  0.17840000   2.30147593
  0.17840000   2.30147507
  0.17840000   2.30147424
  0.17840000   2.30147346
  0.17840000   2.30147272
  0.17840000   2.30147201
  0.17840000   2.30147134
  0.17840000   2.30147070
  0.17860000   2.30189305
  0.17860000   2.30189046
  0.17860000   2.30188824
  0.17860000   2.30188612
  0.17860000   2.30188422
  0.17860000   2.30188244
  0.17860000   2.30188081
  0.17860000   2.30187928
  0.17860000   2.30187786
  0.17860000   2.30187653
  0.17860000   2.30187529
  0.17860000   2.30187413
  0.17860000   2.30187303
  0.17860000   2.30187200
  0.17860000   2.30187103
  0.17860000   2.30187011
  0.17860000   2.30186924
  0.17860000   2.30186842
  0.17860000   2.30186764
  0.17860000   2.30186689
  0.17860000   2.30186618
  0.17860000   2.30186551
  0.17860000   2.30186487
  0.17880000   2.30228534
  0.17880000   2.30228270
  0.17880000   2.30228050
  0.17880000   2.30227837
  0.17880000   2.30227648
  0.17880000   2.30227469
  0.17880000   2.30227306
  0.17880000   2.30227153
  0.17880000   2.30227011
  0.17880000   2.30226878
  0.17880000   2.30226754
  0.17880000   2.30226637
  0.17880000   2.30226528
  0.17880000   2.30226424
  0.17880000   2.30226327
  0.17880000   2.30226235
  0.17880000   2.30226148
  0.17880000   2.30226066
  0.17880000   2.30225987
  0.17880000   2.30225913
  0.17880000   2.30225842
  0.17880000   2.30225774
  0.17880000   2.30225710
  0.17900000   2.30267571
  0.17900000   2.30267301
  0.17900000   2.30267085
  0.17900000   2.30266869
  0.17900000   2.30266681
  0.17900000   2.30266501
  0.17900000   2.30266338
  0.17900000   2.30266185
  0.17900000   2.30266043
  0.17900000   2.30265910
  0.17900000   2.30265786
  0.17900000   2.30265669
  0.17900000   2.30265559
  0.17900000   2.30265456
  0.17900000   2.30265359
  0.17900000   2.30265267
  0.17900000   2.30265179
  0.17900000   2.30265097
  0.17900000   2.30265018
  0.17900000   2.30264944
  0.17900000   2.30264873
  0.17900000   2.30264805
  0.17900000   2.30264741
  0.17920000   2.30306418
  0.17920000   2.30306140
  0.17920000   2.30305929
  0.17920000   2.30305710
  0.17920000   2.30305523
  0.17920000   2.30305343
  0.17920000   2.30305180
  0.17920000   2.30305026
  0.17920000   2.30304884
  0.17920000   2.30304751
  0.17920000   2.30304627
  0.17920000   2.30304510
  0.17920000   2.30304400
  0.17920000   2.30304297
  0.17920000   2.30304199
  0.17920000   2.30304107
  0.17920000   2.30304020
  0.17920000   2.30303937
  0.17920000   2.30303859
  0.17920000   2.30303784
  0.17920000   2.30303713
  0.17920000   2.30303645
  0.17920000   2.30303581
  0.17940000   2.30345077
  0.17940000   2.30344790
  0.17940000   2.30344583
  0.17940000   2.30344362
  0.17940000   2.30344176
  0.17940000   2.30343994
  0.17940000   2.30343832
  0.17940000   2.30343678
  0.17940000   2.30343536
  0.17940000   2.30343402
  0.17940000   2.30343278
  0.17940000   2.30343161
  0.17940000   2.30343051
  0.17940000   2.30342948
  0.17940000   2.30342850
  0.17940000   2.30342758
  0.17940000   2.30342670
  0.17940000   2.30342588
  0.17940000   2.30342509
  0.17940000   2.30342434
  0.17940000   2.30342363
  0.17940000   2.30342295
  0.17940000   2.30342231
  0.17960000   2.30383549
  0.17960000   2.30383250
  0.17960000   2.30383050
  0.17960000   2.30382824
  0.17960000   2.30382641
  0.17960000   2.30382458
  0.17960000   2.30382296
  0.17960000   2.30382141
  0.17960000   2.30381999
  0.17960000   2.30381865
  0.17960000   2.30381741
  0.17960000   2.30381624
  0.17960000   2.30381514
  0.17960000   2.30381410
  0.17960000   2.30381312
  0.17960000   2.30381220
  0.17960000   2.30381133
  0.17960000   2.30381050
  0.17960000   2.30380971
  0.17960000   2.30380896
  0.17960000   2.30380825
  0.17960000   2.30380757
  0.17960000   2.30380692
  0.17980000   2.30421834
  0.17980000   2.30421522
  0.17980000   2.30421329
  0.17980000   2.30421099
  0.17980000   2.30420918
  0.17980000   2.30420733
  0.17980000   2.30420572
  0.17980000   2.30420417
  0.17980000   2.30420275
  0.17980000   2.30420141
  0.17980000   2.30420017
  0.17980000   2.30419899
  0.17980000   2.30419789
  0.17980000   2.30419686
  0.17980000   2.30419588
  0.17980000   2.30419495
  0.17980000   2.30419408
  0.17980000   2.30419325
  0.17980000   2.30419246
  0.17980000   2.30419171
  0.17980000   2.30419100
  0.17980000   2.30419032
  0.17980000   2.30418967
  0.18000000   2.30459936
  0.18000000   2.30459607
  0.18000000   2.30459424
  0.18000000   2.30459188
  0.18000000   2.30459010
  0.18000000   2.30458823
  0.18000000   2.30458663
  0.18000000   2.30458507
  0.18000000   2.30458366
  0.18000000   2.30458231
  0.18000000   2.30458107
  0.18000000   2.30457989
  0.18000000   2.30457879
  0.18000000   2.30457775
  0.18000000   2.30457677
  0.18000000   2.30457585
  0.18000000   2.30457497
  0.18000000   2.30457414
  0.18000000   2.30457335
  0.18000000   2.30457260
  0.18000000   2.30457189
  0.18000000   2.30457121
  0.18000000   2.30457056
  0.18020000   2.30497856
  0.18020000   2.30497506
  0.18020000   2.30497336
  0.18020000   2.30497092
  0.18020000   2.30496919
  0.18020000   2.30496728
  0.18020000   2.30496570
  0.18020000   2.30496412
  0.18020000   2.30496272
  0.18020000   2.30496137
  0.18020000   2.30496012
  0.18020000   2.30495895
  0.18020000   2.30495784
  0.18020000   2.30495680
  0.18020000   2.30495582
  0.18020000   2.30495490
  0.18020000   2.30495402
  0.18020000   2.30495319
  0.18020000   2.30495240
  0.18020000   2.30495165
  0.18020000   2.30495093
  0.18020000   2.30495025
  0.18020000   2.30494960
  0.18040000   2.30535595
  0.18040000   2.30535220
  0.18040000   2.30535064
  0.18040000   2.30534811
  0.18040000   2.30534644
  0.18040000   2.30534450
  0.18040000   2.30534293
  0.18040000   2.30534135
  0.18040000   2.30533994
  0.18040000   2.30533859
  0.18040000   2.30533735
  0.18040000   2.30533616
  0.18040000   2.30533506
  0.18040000   2.30533402
  0.18040000   2.30533304
  0.18040000   2.30533211
  0.18040000   2.30533124
  0.18040000   2.30533040
  0.18040000   2.30532961
  0.18040000   2.30532886
  0.18040000   2.30532815
  0.18040000   2.30532746
  0.18040000   2.30532681
  0.18060000   2.30573154
  0.18060000   2.30572751
  0.18060000   2.30572612
  0.18060000   2.30572348
  0.18060000   2.30572187
  0.18060000   2.30571989
  0.18060000   2.30571835
  0.18060000   2.30571675
  0.18060000   2.30571535
  0.18060000   2.30571399
  0.18060000   2.30571275
  0.18060000   2.30571157
  0.18060000   2.30571047
  0.18060000   2.30570942
  0.18060000   2.30570844
  0.18060000   2.30570751
  0.18060000   2.30570663
  0.18060000   2.30570580
  0.18060000   2.30570501
  0.18060000   2.30570425
  0.18060000   2.30570354
  0.18060000   2.30570285
  0.18060000   2.30570220
  0.18080000   2.30610536
  0.18080000   2.30610099
  0.18080000   2.30609981
  0.18080000   2.30609704
  0.18080000   2.30609550
  0.18080000   2.30609348
  0.18080000   2.30609196
  0.18080000   2.30609034
  0.18080000   2.30608895
  0.18080000   2.30608758
  0.18080000   2.30608635
  0.18080000   2.30608516
  0.18080000   2.30608406
  0.18080000   2.30608301
  0.18080000   2.30608203
  0.18080000   2.30608110
  0.18080000   2.30608022
  0.18080000   2.30607939
  0.18080000   2.30607859
  0.18080000   2.30607784
  0.18080000   2.30607712
  0.18080000   2.30607644
  0.18080000   2.30607579
  0.18100000   2.30647742
  0.18100000   2.30647265
  0.18100000   2.30647172
  0.18100000   2.30646879
  0.18100000   2.30646735
  0.18100000   2.30646526
  0.18100000   2.30646378
  0.18100000   2.30646213
  0.18100000   2.30646076
  0.18100000   2.30645938
  0.18100000   2.30645815
  0.18100000   2.30645695
  0.18100000   2.30645586
  0.18100000   2.30645481
  0.18100000   2.30645383
  0.18100000   2.30645289
  0.18100000   2.30645201
  0.18100000   2.30645118
  0.18100000   2.30645038
  0.18100000   2.30644963
  0.18100000   2.30644891
  0.18100000   2.30644823
  0.18100000   2.30644757
  0.18120000   2.30684774
  0.18120000   2.30684250
  0.18120000   2.30684186
  0.18120000   2.30683875
  0.18120000   2.30683742
  0.18120000   2.30683526
  0.18120000   2.30683382
  0.18120000   2.30683214
  0.18120000   2.30683079
  0.18120000   2.30682939
  0.18120000   2.30682817
  0.18120000   2.30682697
  0.18120000   2.30682587
  0.18120000   2.30682482
  0.18120000   2.30682384
  0.18120000   2.30682290
  0.18120000   2.30682202
  0.18120000   2.30682118
  0.18120000   2.30682039
  0.18120000   2.30681964
  0.18120000   2.30681892
  0.18120000   2.30681823
  0.18120000   2.30681758
  0.18140000   2.30721634
  0.18140000   2.30721054
  0.18140000   2.30721025
  0.18140000   2.30720692
  0.18140000   2.30720572
  0.18140000   2.30720347
  0.18140000   2.30720209
  0.18140000   2.30720038
  0.18140000   2.30719904
  0.18140000   2.30719764
  0.18140000   2.30719642
  0.18140000   2.30719521
  0.18140000   2.30719412
  0.18140000   2.30719306
  0.18140000   2.30719208
  0.18140000   2.30719114
  0.18140000   2.30719026
  0.18140000   2.30718942
  0.18140000   2.30718863
  0.18140000   2.30718787
  0.18140000   2.30718715
  0.18140000   2.30718647
  0.18140000   2.30718581
  0.18160000   2.30758323
  0.18160000   2.30757679
  0.18160000   2.30757691
  0.18160000   2.30757331
  0.18160000   2.30757228
  0.18160000   2.30756993
  0.18160000   2.30756861
  0.18160000   2.30756685
  0.18160000   2.30756554
  0.18160000   2.30756412
  0.18160000   2.30756291
  0.18160000   2.30756169
  0.18160000   2.30756060
  0.18160000   2.30755954
  0.18160000   2.30755856
  0.18160000   2.30755762
  0.18160000   2.30755674
  0.18160000   2.30755590
  0.18160000   2.30755511
  0.18160000   2.30755435
  0.18160000   2.30755363
  0.18160000   2.30755294
  0.18160000   2.30755229
  0.18180000   2.30794844
  0.18180000   2.30794125
  0.18180000   2.30794185
  0.18180000   2.30793794
  0.18180000   2.30793711
  0.18180000   2.30793463
  0.18180000   2.30793339
  0.18180000   2.30793158
  0.18180000   2.30793030
  0.18180000   2.30792885
  0.18180000   2.30792765
  0.18180000   2.30792643
  0.18180000   2.30792534
  0.18180000   2.30792428
  0.18180000   2.30792330
  0.18180000   2.30792236
  0.18180000   2.30792147
  0.18180000   2.30792063
  0.18180000   2.30791984
  0.18180000   2.30791908
  0.18180000   2.30791836
  0.18180000   2.30791767
  0.18180000   2.30791702
  0.18200000   2.30831199
  0.18200000   2.30830393
  0.18200000   2.30830508
  0.18200000   2.30830081
  0.18200000   2.30830021
  0.18200000   2.30829758
  0.18200000   2.30829643
  0.18200000   2.30829456
  0.18200000   2.30829332
  0.18200000   2.30829185
  0.18200000   2.30829066
  0.18200000   2.30828943
  0.18200000   2.30828834
  0.18200000   2.30828728
  0.18200000   2.30828630
  0.18200000   2.30828536
  0.18200000   2.30828447
  0.18200000   2.30828363
  0.18200000   2.30828283
  0.18200000   2.30828207
  0.18200000   2.30828135
  0.18200000   2.30828066
  0.18200000   2.30828001
  0.18220000   2.30867389
  0.18220000   2.30866483
  0.18220000   2.30866663
  0.18220000   2.30866194
  0.18220000   2.30866161
  0.18220000   2.30865880
  0.18220000   2.30865777
  0.18220000   2.30865582
  0.18220000   2.30865462
  0.18220000   2.30865312
  0.18220000   2.30865195
  0.18220000   2.30865070
  0.18220000   2.30864963
  0.18220000   2.30864855
  0.18220000   2.30864758
  0.18220000   2.30864663
  0.18220000   2.30864575
  0.18220000   2.30864490
  0.18220000   2.30864411
  0.18220000   2.30864335
  0.18220000   2.30864262
  0.18220000   2.30864193
  0.18220000   2.30864128
  0.18240000   2.30903418
  0.18240000   2.30902395
  0.18240000   2.30902651
  0.18240000   2.30902132
  0.18240000   2.30902131
  0.18240000   2.30901829
  0.18240000   2.30901739
  0.18240000   2.30901535
  0.18240000   2.30901422
  0.18240000   2.30901267
  0.18240000   2.30901153
  0.18240000   2.30901027
  0.18240000   2.30900920
  0.18240000   2.30900812
  0.18240000   2.30900714
  0.18240000   2.30900619
  0.18240000   2.30900531
  0.18240000   2.30900447
  0.18240000   2.30900367
  0.18240000   2.30900291
  0.18240000   2.30900218
  0.18240000   2.30900149
  0.18240000   2.30900083
  0.18260000   2.30939286
  0.18260000   2.30938130
  0.18260000   2.30938474
  0.18260000   2.30937897
  0.18260000   2.30937934
  0.18260000   2.30937607
  0.18260000   2.30937533
  0.18260000   2.30937318
  0.18260000   2.30937212
  0.18260000   2.30937052
  0.18260000   2.30936941
  0.18260000   2.30936812
  0.18260000   2.30936707
  0.18260000   2.30936598
  0.18260000   2.30936501
  0.18260000   2.30936405
  0.18260000   2.30936317
  0.18260000   2.30936232
  0.18260000   2.30936153
  0.18260000   2.30936076
  0.18260000   2.30936004
  0.18260000   2.30935935
  0.18260000   2.30935869
  0.18280000   2.30974998
  0.18280000   2.30973689
  0.18280000   2.30974133
  0.18280000   2.30973489
  0.18280000   2.30973570
  0.18280000   2.30973213
  0.18280000   2.30973159
  0.18280000   2.30972932
  0.18280000   2.30972833
  0.18280000   2.30972668
  0.18280000   2.30972560
  0.18280000   2.30972429
  0.18280000   2.30972325
  0.18280000   2.30972215
  0.18280000   2.30972119
  0.18280000   2.30972023
  0.18280000   2.30971935
  0.18280000   2.30971850
  0.18280000   2.30971770
  0.18280000   2.30971693
  0.18280000   2.30971621
  0.18280000   2.30971552
  0.18280000   2.30971486
  0.18300000   2.31010554
  0.18300000   2.31009070
  0.18300000   2.31009631
  0.18300000   2.31008909
  0.18300000   2.31009042
  0.18300000   2.31008651
  0.18300000   2.31008619
  0.18300000   2.31008376
  0.18300000   2.31008287
  0.18300000   2.31008116
  0.18300000   2.31008012
  0.18300000   2.31007878
  0.18300000   2.31007776
  0.18300000   2.31007664
  0.18300000   2.31007569
  0.18300000   2.31007472
  0.18300000   2.31007385
  0.18300000   2.31007299
  0.18300000   2.31007219
  0.18300000   2.31007143
  0.18300000   2.31007070
  0.18300000   2.31007001
  0.18300000   2.31006935
  0.18320000   2.31045959
  0.18320000   2.31044274
  0.18320000   2.31044970
  0.18320000   2.31044158
  0.18320000   2.31044351
  0.18320000   2.31043918
  0.18320000   2.31043914
  0.18320000   2.31043653
  0.18320000   2.31043576
  0.18320000   2.31043396
  0.18320000   2.31043298
  0.18320000   2.31043160
  0.18320000   2.31043060
  0.18320000   2.31042947
  0.18320000   2.31042852
  0.18320000   2.31042755
  0.18320000   2.31042667
  0.18320000   2.31042581
  0.18320000   2.31042502
  0.18320000   2.31042425
  0.18320000   2.31042353
  0.18320000   2.31042283
  0.18320000   2.31042217
  0.18340000   2.31081214
  0.18340000   2.31079302
  0.18340000   2.31080151
  0.18340000   2.31079235
  0.18340000   2.31079498
  0.18340000   2.31079018
  0.18340000   2.31079045
  0.18340000   2.31078762
  0.18340000   2.31078700
  0.18340000   2.31078510
  0.18340000   2.31078418
  0.18340000   2.31078276
  0.18340000   2.31078179
  0.18340000   2.31078063
  0.18340000   2.31077970
  0.18340000   2.31077871
  0.18340000   2.31077785
  0.18340000   2.31077699
  0.18340000   2.31077619
  0.18340000   2.31077542
  0.18340000   2.31077470
  0.18340000   2.31077400
  0.18340000   2.31077334
  0.18360000   2.31116323
  0.18360000   2.31114151
  0.18360000   2.31115177
  0.18360000   2.31114140
  0.18360000   2.31114485
  0.18360000   2.31113950
  0.18360000   2.31114014
  0.18360000   2.31113706
  0.18360000   2.31113660
  0.18360000   2.31113459
  0.18360000   2.31113375
  0.18360000   2.31113227
  0.18360000   2.31113133
  0.18360000   2.31113015
  0.18360000   2.31112924
  0.18360000   2.31112824
  0.18360000   2.31112738
  0.18360000   2.31112651
  0.18360000   2.31112572
  0.18360000   2.31112494
  0.18360000   2.31112422
  0.18360000   2.31112352
  0.18360000   2.31112286
  0.18380000   2.31151288
  0.18380000   2.31148823
  0.18380000   2.31150050
  0.18380000   2.31148875
  0.18380000   2.31149314
  0.18380000   2.31148714
  0.18380000   2.31148822
  0.18380000   2.31148484
  0.18380000   2.31148459
  0.18380000   2.31148244
  0.18380000   2.31148169
  0.18380000   2.31148015
  0.18380000   2.31147925
  0.18380000   2.31147804
  0.18380000   2.31147714
  0.18380000   2.31147613
  0.18380000   2.31147528
  0.18380000   2.31147440
  0.18380000   2.31147361
  0.18380000   2.31147283
  0.18380000   2.31147211
  0.18380000   2.31147141
  0.18380000   2.31147075
  0.18400000   2.31186114
  0.18400000   2.31183317
  0.18400000   2.31184773
  0.18400000   2.31183440
  0.18400000   2.31183987
  0.18400000   2.31183312
  0.18400000   2.31183471
  0.18400000   2.31183098
  0.18400000   2.31183097
  0.18400000   2.31182865
  0.18400000   2.31182801
  0.18400000   2.31182639
  0.18400000   2.31182555
  0.18400000   2.31182430
  0.18400000   2.31182342
  0.18400000   2.31182239
  0.18400000   2.31182155
  0.18400000   2.31182067
  0.18400000   2.31181988
  0.18400000   2.31181910
  0.18400000   2.31181838
  0.18400000   2.31181768
  0.18400000   2.31181702
  0.18420000   2.31220803
  0.18420000   2.31217631
  0.18420000   2.31219347
  0.18420000   2.31217833
  0.18420000   2.31218505
  0.18420000   2.31217744
  0.18420000   2.31217963
  0.18420000   2.31217548
  0.18420000   2.31217575
  0.18420000   2.31217323
  0.18420000   2.31217273
  0.18420000   2.31217102
  0.18420000   2.31217023
  0.18420000   2.31216894
  0.18420000   2.31216809
  0.18420000   2.31216705
  0.18420000   2.31216622
  0.18420000   2.31216532
  0.18420000   2.31216454
  0.18420000   2.31216375
  0.18420000   2.31216304
  0.18420000   2.31216233
  0.18420000   2.31216167
  0.18440000   2.31255360
  0.18440000   2.31251764
  0.18440000   2.31253776
  0.18440000   2.31252056
  0.18440000   2.31252871
  0.18440000   2.31252010
  0.18440000   2.31252298
  0.18440000   2.31251835
  0.18440000   2.31251895
  0.18440000   2.31251621
  0.18440000   2.31251586
  0.18440000   2.31251403
  0.18440000   2.31251333
  0.18440000   2.31251198
  0.18440000   2.31251117
  0.18440000   2.31251009
  0.18440000   2.31250928
  0.18440000   2.31250837
  0.18440000   2.31250760
  0.18440000   2.31250680
  0.18440000   2.31250609
  0.18440000   2.31250538
  0.18440000   2.31250472
  0.18460000   2.31289787
  0.18460000   2.31285716
  0.18460000   2.31288062
  0.18460000   2.31286107
  0.18460000   2.31287087
  0.18460000   2.31286111
  0.18460000   2.31286479
  0.18460000   2.31285960
  0.18460000   2.31286059
  0.18460000   2.31285757
  0.18460000   2.31285740
  0.18460000   2.31285545
  0.18460000   2.31285483
  0.18460000   2.31285342
  0.18460000   2.31285265
  0.18460000   2.31285155
  0.18460000   2.31285075
  0.18460000   2.31284983
  0.18460000   2.31284907
  0.18460000   2.31284827
  0.18460000   2.31284755
  0.18460000   2.31284684
  0.18460000   2.31284618
  0.18480000   2.31324090
  0.18480000   2.31319485
  0.18480000   2.31322209
  0.18480000   2.31319987
  0.18480000   2.31321155
  0.18480000   2.31320045
  0.18480000   2.31320507
  0.18480000   2.31319922
  0.18480000   2.31320067
  0.18480000   2.31319733
  0.18480000   2.31319739
  0.18480000   2.31319527
  0.18480000   2.31319476
  0.18480000   2.31319328
  0.18480000   2.31319256
  0.18480000   2.31319141
  0.18480000   2.31319065
  0.18480000   2.31318971
  0.18480000   2.31318895
  0.18480000   2.31318814
  0.18480000   2.31318744
  0.18480000   2.31318672
  0.18480000   2.31318606
  0.18500000   2.31358272
  0.18500000   2.31353070
  0.18500000   2.31356219
  0.18500000   2.31353694
  0.18500000   2.31355077
  0.18500000   2.31353815
  0.18500000   2.31354384
  0.18500000   2.31353723
  0.18500000   2.31353921
  0.18500000   2.31353549
  0.18500000   2.31353582
  0.18500000   2.31353351
  0.18500000   2.31353314
  0.18500000   2.31353156
  0.18500000   2.31353090
  0.18500000   2.31352971
  0.18500000   2.31352897
  0.18500000   2.31352801
  0.18500000   2.31352727
  0.18500000   2.31352645
  0.18500000   2.31352575
  0.18500000   2.31352502
  0.18500000   2.31352437
  0.18520000   2.31392339
  0.18520000   2.31386468
  0.18520000   2.31390096
  0.18520000   2.31387228
  0.18520000   2.31388856
  0.18520000   2.31387419
  0.18520000   2.31388112
  0.18520000   2.31387363
  0.18520000   2.31387624
  0.18520000   2.31387206
  0.18520000   2.31387271
  0.18520000   2.31387018
  0.18520000   2.31386996
  0.18520000   2.31386827
  0.18520000   2.31386769
  0.18520000   2.31386644
  0.18520000   2.31386574
  0.18520000   2.31386475
  0.18520000   2.31386403
  0.18520000   2.31386319
  0.18520000   2.31386250
  0.18520000   2.31386177
  0.18520000   2.31386112
  0.18540000   2.31426294
  0.18540000   2.31419678
  0.18540000   2.31423844
  0.18540000   2.31420588
  0.18540000   2.31422494
  0.18540000   2.31420857
  0.18540000   2.31421694
  0.18540000   2.31420841
  0.18540000   2.31421175
  0.18540000   2.31420706
  0.18540000   2.31420807
  0.18540000   2.31420528
  0.18540000   2.31420525
  0.18540000   2.31420342
  0.18540000   2.31420293
  0.18540000   2.31420162
  0.18540000   2.31420097
  0.18540000   2.31419994
  0.18540000   2.31419924
  0.18540000   2.31419839
  0.18540000   2.31419771
  0.18540000   2.31419696
  0.18540000   2.31419632
  0.18560000   2.31460144
  0.18560000   2.31452696
  0.18560000   2.31457465
  0.18560000   2.31453772
  0.18560000   2.31455994
  0.18560000   2.31454129
  0.18560000   2.31455130
  0.18560000   2.31454159
  0.18560000   2.31454578
  0.18560000   2.31454047
  0.18560000   2.31454192
  0.18560000   2.31453882
  0.18560000   2.31453900
  0.18560000   2.31453701
  0.18560000   2.31453665
  0.18560000   2.31453525
  0.18560000   2.31453465
  0.18560000   2.31453358
  0.18560000   2.31453292
  0.18560000   2.31453204
  0.18560000   2.31453137
  0.18560000   2.31453062
  0.18560000   2.31452998
  0.18580000   2.31493892
  0.18580000   2.31485522
  0.18580000   2.31490964
  0.18580000   2.31486780
  0.18580000   2.31489359
  0.18580000   2.31487235
  0.18580000   2.31488423
  0.18580000   2.31487316
  0.18580000   2.31487833
  0.18580000   2.31487231
  0.18580000   2.31487428
  0.18580000   2.31487080
  0.18580000   2.31487125
  0.18580000   2.31486907
  0.18580000   2.31486884
  0.18580000   2.31486734
  0.18580000   2.31486681
  0.18580000   2.31486569
  0.18580000   2.31486506
  0.18580000   2.31486416
  0.18580000   2.31486351
  0.18580000   2.31486274
  0.18580000   2.31486211
  0.18600000   2.31527546
  0.18600000   2.31518151
  0.18600000   2.31524346
  0.18600000   2.31519610
  0.18600000   2.31522592
  0.18600000   2.31520172
  0.18600000   2.31521576
  0.18600000   2.31520312
  0.18600000   2.31520943
  0.18600000   2.31520259
  0.18600000   2.31520515
  0.18600000   2.31520123
  0.18600000   2.31520200
  0.18600000   2.31519959
  0.18600000   2.31519952
  0.18600000   2.31519790
  0.18600000   2.31519746
  0.18600000   2.31519627
  0.18600000   2.31519569
  0.18600000   2.31519475
  0.18600000   2.31519412
  0.18600000   2.31519334
  0.18600000   2.31519272
  0.18620000   2.31561110
  0.18620000   2.31550580
  0.18620000   2.31557614
  0.18620000   2.31552259
  0.18620000   2.31555697
  0.18620000   2.31552942
  0.18620000   2.31554591
  0.18620000   2.31553147
  0.18620000   2.31553910
  0.18620000   2.31553129
  0.18620000   2.31553455
  0.18620000   2.31553012
  0.18620000   2.31553126
  0.18620000   2.31552858
  0.18620000   2.31552870
  0.18620000   2.31552694
  0.18620000   2.31552661
  0.18620000   2.31552534
  0.18620000   2.31552481
  0.18620000   2.31552383
  0.18620000   2.31552323
  0.18620000   2.31552243
  0.18620000   2.31552183
  0.18640000   2.31594591
  0.18640000   2.31582807
  0.18640000   2.31590773
  0.18640000   2.31584726
  0.18640000   2.31588676
  0.18640000   2.31585543
  0.18640000   2.31587471
  0.18640000   2.31585821
  0.18640000   2.31586735
  0.18640000   2.31585842
  0.18640000   2.31586250
  0.18640000   2.31585747
  0.18640000   2.31585905
  0.18640000   2.31585604
  0.18640000   2.31585640
  0.18640000   2.31585447
  0.18640000   2.31585426
  0.18640000   2.31585290
  0.18640000   2.31585244
  0.18640000   2.31585141
  0.18640000   2.31585084
  0.18640000   2.31585001
  0.18640000   2.31584943
  0.18660000   2.31627994
  0.18660000   2.31614827
  0.18660000   2.31623828
  0.18660000   2.31617009
  0.18660000   2.31621534
  0.18660000   2.31617972
  0.18660000   2.31620218
  0.18660000   2.31618332
  0.18660000   2.31619421
  0.18660000   2.31618399
  0.18660000   2.31618902
  0.18660000   2.31618329
  0.18660000   2.31618538
  0.18660000   2.31618199
  0.18660000   2.31618263
  0.18660000   2.31618049
  0.18660000   2.31618043
  0.18660000   2.31617896
  0.18660000   2.31617858
  0.18660000   2.31617749
  0.18660000   2.31617697
  0.18660000   2.31617610
  0.18660000   2.31617554
  0.18680000   2.31661327
  0.18680000   2.31646638
  0.18680000   2.31656784
  0.18680000   2.31649104
  0.18680000   2.31654274
  0.18680000   2.31650230
  0.18680000   2.31652836
  0.18680000   2.31650682
  0.18680000   2.31651969
  0.18680000   2.31650799
  0.18680000   2.31651412
  0.18680000   2.31650757
  0.18680000   2.31651027
  0.18680000   2.31650643
  0.18680000   2.31650740
  0.18680000   2.31650502
  0.18680000   2.31650513
  0.18680000   2.31650353
  0.18680000   2.31650324
  0.18680000   2.31650208
  0.18680000   2.31650161
  0.18680000   2.31650071
  0.18680000   2.31650017
  0.18700000   2.31694596
  0.18700000   2.31678234
  0.18700000   2.31689646
  0.18700000   2.31681010
  0.18700000   2.31686900
  0.18700000   2.31682314
  0.18700000   2.31685327
  0.18700000   2.31682867
  0.18700000   2.31684384
  0.18700000   2.31683042
  0.18700000   2.31683783
  0.18700000   2.31683032
  0.18700000   2.31683373
  0.18700000   2.31682936
  0.18700000   2.31683073
  0.18700000   2.31682804
  0.18700000   2.31682838
  0.18700000   2.31682662
  0.18700000   2.31682644
  0.18700000   2.31682520
  0.18700000   2.31682479
  0.18700000   2.31682384
  0.18700000   2.31682334
  0.18720000   2.31727808
  0.18720000   2.31709611
  0.18720000   2.31722420
  0.18720000   2.31712722
  0.18720000   2.31719418
  0.18720000   2.31714222
  0.18720000   2.31717695
  0.18720000   2.31714888
  0.18720000   2.31716666
  0.18720000   2.31715128
  0.18720000   2.31716016
  0.18720000   2.31715155
  0.18720000   2.31715578
  0.18720000   2.31715079
  0.18720000   2.31715262
  0.18720000   2.31714959
  0.18720000   2.31715018
  0.18720000   2.31714822
  0.18720000   2.31714820
  0.18720000   2.31714684
  0.18720000   2.31714651
  0.18720000   2.31714550
  0.18720000   2.31714504
  0.18740000   2.31760970
  0.18740000   2.31740765
  0.18740000   2.31755112
  0.18740000   2.31744239
  0.18740000   2.31751830
  0.18740000   2.31745952
  0.18740000   2.31749944
  0.18740000   2.31746743
  0.18740000   2.31748819
  0.18740000   2.31747055
  0.18740000   2.31748113
  0.18740000   2.31747123
  0.18740000   2.31747644
  0.18740000   2.31747072
  0.18740000   2.31747309
  0.18740000   2.31746965
  0.18740000   2.31747055
  0.18740000   2.31746836
  0.18740000   2.31746850
  0.18740000   2.31746702
  0.18740000   2.31746679
  0.18740000   2.31746570
  0.18740000   2.31746530
  0.18760000   2.31794089
  0.18760000   2.31771690
  0.18760000   2.31787728
  0.18760000   2.31775555
  0.18760000   2.31784143
  0.18760000   2.31777502
  0.18760000   2.31782076
  0.18760000   2.31778431
  0.18760000   2.31780845
  0.18760000   2.31778824
  0.18760000   2.31780077
  0.18760000   2.31778939
  0.18760000   2.31779572
  0.18760000   2.31778915
  0.18760000   2.31779216
  0.18760000   2.31778823
  0.18760000   2.31778950
  0.18760000   2.31778703
  0.18760000   2.31778738
  0.18760000   2.31778574
  0.18760000   2.31778563
  0.18760000   2.31778445
  0.18760000   2.31778411
  0.18780000   2.31827172
  0.18780000   2.31802384
  0.18780000   2.31820273
  0.18780000   2.31806669
  0.18780000   2.31816361
  0.18780000   2.31808870
  0.18780000   2.31814097
  0.18780000   2.31809950
  0.18780000   2.31812748
  0.18780000   2.31810433
  0.18780000   2.31811911
  0.18780000   2.31810601
  0.18780000   2.31811364
  0.18780000   2.31810608
  0.18780000   2.31810984
  0.18780000   2.31810534
  0.18780000   2.31810704
  0.18780000   2.31810424
  0.18780000   2.31810485
  0.18780000   2.31810301
  0.18780000   2.31810304
  0.18780000   2.31810175
  0.18780000   2.31810150
  0.18800000   2.31860226
  0.18800000   2.31832839
  0.18800000   2.31852755
  0.18800000   2.31837574
  0.18800000   2.31848489
  0.18800000   2.31840051
  0.18800000   2.31846010
  0.18800000   2.31841299
  0.18800000   2.31844531
  0.18800000   2.31841882
  0.18800000   2.31843616
  0.18800000   2.31842110
  0.18800000   2.31843023
  0.18800000   2.31842151
  0.18800000   2.31842616
  0.18800000   2.31842098
  0.18800000   2.31842319
  0.18800000   2.31842000
  0.18800000   2.31842090
  0.18800000   2.31841884
  0.18800000   2.31841904
  0.18800000   2.31841762
  0.18800000   2.31841747
  0.18820000   2.31893259
  0.18820000   2.31863052
  0.18820000   2.31885178
  0.18820000   2.31868268
  0.18820000   2.31880533
  0.18820000   2.31871044
  0.18820000   2.31877819
  0.18820000   2.31872474
  0.18820000   2.31876197
  0.18820000   2.31873168
  0.18820000   2.31875196
  0.18820000   2.31873463
  0.18820000   2.31874550
  0.18820000   2.31873544
  0.18820000   2.31874112
  0.18820000   2.31873515
  0.18820000   2.31873797
  0.18820000   2.31873431
  0.18820000   2.31873557
  0.18820000   2.31873323
  0.18820000   2.31873364
  0.18820000   2.31873206
  0.18820000   2.31873203
  0.18840000   2.31926275
  0.18840000   2.31893017
  0.18840000   2.31917551
  0.18840000   2.31898747
  0.18840000   2.31912498
  0.18840000   2.31901845
  0.18840000   2.31909530
  0.18840000   2.31903474
  0.18840000   2.31907750
  0.18840000   2.31904291
  0.18840000   2.31906653
  0.18840000   2.31904660
  0.18840000   2.31905949
  0.18840000   2.31904787
  0.18840000   2.31905475
  0.18840000   2.31904785
  0.18840000   2.31905139
  0.18840000   2.31904718
  0.18840000   2.31904886
  0.18840000   2.31904619
  0.18840000   2.31904685
  0.18840000   2.31904508
  0.18840000   2.31904519
  0.18860000   2.31959283
  0.18860000   2.31922730
  0.18860000   2.31949878
  0.18860000   2.31929006
  0.18860000   2.31944389
  0.18860000   2.31932450
  0.18860000   2.31941146
  0.18860000   2.31934297
  0.18860000   2.31939195
  0.18860000   2.31935249
  0.18860000   2.31937990
  0.18860000   2.31935702
  0.18860000   2.31937220
  0.18860000   2.31935880
  0.18860000   2.31936707
  0.18860000   2.31935909
  0.18860000   2.31936346
  0.18860000   2.31935860
  0.18860000   2.31936078
  0.18860000   2.31935772
  0.18860000   2.31935868
  0.18860000   2.31935668
  0.18860000   2.31935697
  0.18880000   2.31992288
  0.18880000   2.31952186
  0.18880000   2.31982167
  0.18880000   2.31959040
  0.18880000   2.31976213
  0.18880000   2.31962856
  0.18880000   2.31972673
  0.18880000   2.31964940
  0.18880000   2.31970534
  0.18880000   2.31966040
  0.18880000   2.31969211
  0.18880000   2.31966585
  0.18880000   2.31968368
  0.18880000   2.31966820
  0.18880000   2.31967809
  0.18880000   2.31966885
  0.18880000   2.31967420
  0.18880000   2.31966857
  0.18880000   2.31967135
  0.18880000   2.31966783
  0.18880000   2.31966915
  0.18880000   2.31966686
  0.18880000   2.31966737
  0.18900000   2.32025295
  0.18900000   2.31981381
  0.18900000   2.32014423
  0.18900000   2.31988846
  0.18900000   2.32007976
  0.18900000   2.31993060
  0.18900000   2.32004115
  0.18900000   2.31995399
  0.18900000   2.32001771
  0.18900000   2.31996662
  0.18900000   2.32000319
  0.18900000   2.31997310
  0.18900000   2.31999395
  0.18900000   2.31997609
  0.18900000   2.31998784
  0.18900000   2.31997714
  0.18900000   2.31998364
  0.18900000   2.31997711
  0.18900000   2.31998059
  0.18900000   2.31997652
  0.18900000   2.31997827
  0.18900000   2.31997564
  0.18900000   2.31997641
  0.18920000   2.32058309
  0.18920000   2.32010312
  0.18920000   2.32046651
  0.18920000   2.32018420
  0.18920000   2.32039681
  0.18920000   2.32023057
  0.18920000   2.32035479
  0.18920000   2.32025673
  0.18920000   2.32032913
  0.18920000   2.32027113
  0.18920000   2.32031318
  0.18920000   2.32027874
  0.18920000   2.32030303
  0.18920000   2.32028245
  0.18920000   2.32029635
  0.18920000   2.32028394
  0.18920000   2.32029178
  0.18920000   2.32028420
  0.18920000   2.32028851
  0.18920000   2.32028378
  0.18920000   2.32028605
  0.18920000   2.32028302
  0.18920000   2.32028410
  0.18940000   2.32091333
  0.18940000   2.32038975
  0.18940000   2.32078858
  0.18940000   2.32047757
  0.18940000   2.32071337
  0.18940000   2.32052845
  0.18940000   2.32066768
  0.18940000   2.32055757
  0.18940000   2.32063962
  0.18940000   2.32057390
  0.18940000   2.32062211
  0.18940000   2.32058276
  0.18940000   2.32061096
  0.18940000   2.32058727
  0.18940000   2.32060364
  0.18940000   2.32058927
  0.18940000   2.32059866
  0.18940000   2.32058985
  0.18940000   2.32059513
  0.18940000   2.32058963
  0.18940000   2.32059250
  0.18940000   2.32058900
  0.18940000   2.32059046
  0.18960000   2.32124369
  0.18960000   2.32067370
  0.18960000   2.32111047
  0.18960000   2.32076855
  0.18960000   2.32102946
  0.18960000   2.32082419
  0.18960000   2.32097987
  0.18960000   2.32085649
  0.18960000   2.32094923
  0.18960000   2.32087492
  0.18960000   2.32093003
  0.18960000   2.32088514
  0.18960000   2.32091776
  0.18960000   2.32089054
  0.18960000   2.32090973
  0.18960000   2.32089311
  0.18960000   2.32090429
  0.18960000   2.32089405
  0.18960000   2.32090047
  0.18960000   2.32089407
  0.18960000   2.32089765
  0.18960000   2.32089357
  0.18960000   2.32089549
  0.18980000   2.32157418
  0.18980000   2.32095495
  0.18980000   2.32143221
  0.18980000   2.32105711
  0.18980000   2.32134515
  0.18980000   2.32111777
  0.18980000   2.32129143
  0.18980000   2.32115345
  0.18980000   2.32125801
  0.18980000   2.32117414
  0.18980000   2.32123696
  0.18980000   2.32118586
  0.18980000   2.32122348
  0.18980000   2.32119224
  0.18980000   2.32121465
  0.18980000   2.32119545
  0.18980000   2.32120870
  0.18980000   2.32119680
  0.18980000   2.32120454
  0.18980000   2.32119708
  0.18980000   2.32120151
  0.18980000   2.32119676
  0.18980000   2.32119921
  0.19000000   2.32190478
  0.19000000   2.32123351
  0.19000000   2.32175384
  0.19000000   2.32134324
  0.19000000   2.32166046
  0.19000000   2.32140915
  0.19000000   2.32160239
  0.19000000   2.32144843
  0.19000000   2.32156600
  0.19000000   2.32147156
  0.19000000   2.32154296
  0.19000000   2.32148490
  0.19000000   2.32152815
  0.19000000   2.32149236
  0.19000000   2.32151844
  0.19000000   2.32149627
  0.19000000   2.32151191
  0.19000000   2.32149809
  0.19000000   2.32150737
  0.19000000   2.32149867
  0.19000000   2.32150409
  0.19000000   2.32149855
  0.19000000   2.32150163
  0.19020000   2.32223546
  0.19020000   2.32150941
  0.19020000   2.32207536
  0.19020000   2.32162692
  0.19020000   2.32197543
  0.19020000   2.32169832
  0.19020000   2.32191278
  0.19020000   2.32174140
  0.19020000   2.32187325
  0.19020000   2.32176713
  0.19020000   2.32184806
  0.19020000   2.32178224
  0.19020000   2.32183180
  0.19020000   2.32179088
  0.19020000   2.32182112
  0.19020000   2.32179558
  0.19020000   2.32181395
  0.19020000   2.32179792
  0.19020000   2.32180898
  0.19020000   2.32179884
  0.19020000   2.32180543
  0.19020000   2.32179894
  0.19020000   2.32180278
  0.19040000   2.32256616
  0.19040000   2.32178269
  0.19040000   2.32239676
  0.19040000   2.32190816
  0.19040000   2.32229010
  0.19040000   2.32198526
  0.19040000   2.32222267
  0.19040000   2.32203235
  0.19040000   2.32217979
  0.19040000   2.32206085
  0.19040000   2.32215230
  0.19040000   2.32207786
  0.19040000   2.32213447
  0.19040000   2.32208778
  0.19040000   2.32212273
  0.19040000   2.32209335
  0.19040000   2.32211484
  0.19040000   2.32209627
  0.19040000   2.32210939
  0.19040000   2.32209759
  0.19040000   2.32210552
  0.19040000   2.32209794
  0.19040000   2.32210266
  0.19060000   2.32289679
  0.19060000   2.32205342
  0.19060000   2.32271802
  0.19060000   2.32218699
  0.19060000   2.32260445
  0.19060000   2.32226996
  0.19060000   2.32253205
  0.19060000   2.32232124
  0.19060000   2.32248566
  0.19060000   2.32235268
  0.19060000   2.32245571
  0.19060000   2.32237173
  0.19060000   2.32243619
  0.19060000   2.32238305
  0.19060000   2.32242329
  0.19060000   2.32238958
  0.19060000   2.32241461
  0.19060000   2.32239314
  0.19060000   2.32240863
  0.19060000   2.32239489
  0.19060000   2.32240440
  0.19060000   2.32239553
  0.19060000   2.32240130
  0.19080000   2.32322721
  0.19080000   2.32232171
  0.19080000   2.32303907
  0.19080000   2.32246345
  0.19080000   2.32291849
  0.19080000   2.32255245
  0.19080000   2.32284097
  0.19080000   2.32260808
  0.19080000   2.32279089
  0.19080000   2.32264261
  0.19080000   2.32275834
  0.19080000   2.32266384
  0.19080000   2.32273700
  0.19080000   2.32267668
  0.19080000   2.32272284
  0.19080000   2.32268425
  0.19080000   2.32271329
  0.19080000   2.32268852
  0.19080000   2.32270672
  0.19080000   2.32269076
  0.19080000   2.32270208
  0.19080000   2.32269173
  0.19080000   2.32269871
  0.19100000   2.32355726
  0.19100000   2.32258770
  0.19100000   2.32335985
  0.19100000   2.32273760
  0.19100000   2.32323219
  0.19100000   2.32283273
  0.19100000   2.32314940
  0.19100000   2.32289286
  0.19100000   2.32309550
  0.19100000   2.32293064
  0.19100000   2.32306021
  0.19100000   2.32295417
  0.19100000   2.32303693
  0.19100000   2.32296863
  0.19100000   2.32302140
  0.19100000   2.32297734
  0.19100000   2.32301091
  0.19100000   2.32298240
  0.19100000   2.32300368
  0.19100000   2.32298517
  0.19100000   2.32299860
  0.19100000   2.32298652
  0.19100000   2.32299492
  0.19120000   2.32388672
  0.19120000   2.32285157
  0.19120000   2.32368022
  0.19120000   2.32300955
  0.19120000   2.32354549
  0.19120000   2.32311086
  0.19120000   2.32345736
  0.19120000   2.32317560
  0.19120000   2.32339951
  0.19120000   2.32321675
  0.19120000   2.32336135
  0.19120000   2.32324272
  0.19120000   2.32333600
  0.19120000   2.32325891
  0.19120000   2.32331902
  0.19120000   2.32326884
  0.19120000   2.32330749
  0.19120000   2.32327477
  0.19120000   2.32329954
  0.19120000   2.32327814
  0.19120000   2.32329396
  0.19120000   2.32327989
  0.19120000   2.32328993
  0.19140000   2.32421532
  0.19140000   2.32311353
  0.19140000   2.32400003
  0.19140000   2.32327944
  0.19140000   2.32385831
  0.19140000   2.32338692
  0.19140000   2.32376480
  0.19140000   2.32345633
  0.19140000   2.32370290
  0.19140000   2.32350097
  0.19140000   2.32366176
  0.19140000   2.32352947
  0.19140000   2.32363425
  0.19140000   2.32354751
  0.19140000   2.32361570
  0.19140000   2.32355875
  0.19140000   2.32360306
  0.19140000   2.32356561
  0.19140000   2.32359433
  0.19140000   2.32356963
  0.19140000   2.32358819
  0.19140000   2.32357185
  0.19140000   2.32358378
  0.19160000   2.32454272
  0.19160000   2.32337388
  0.19160000   2.32431908
  0.19160000   2.32354742
  0.19160000   2.32417053
  0.19160000   2.32366099
  0.19160000   2.32407165
  0.19160000   2.32373512
  0.19160000   2.32400567
  0.19160000   2.32378330
  0.19160000   2.32396145
  0.19160000   2.32381445
  0.19160000   2.32393167
  0.19160000   2.32383441
  0.19160000   2.32391148
  0.19160000   2.32384706
  0.19160000   2.32389765
  0.19160000   2.32385492
  0.19160000   2.32388806
  0.19160000   2.32385966
  0.19160000   2.32388132
  0.19160000   2.32386238
  0.19160000   2.32387648
  0.19180000   2.32486852
  0.19180000   2.32363296
  0.19180000   2.32463709
  0.19180000   2.32381374
  0.19180000   2.32448198
  0.19180000   2.32393323
  0.19180000   2.32437784
  0.19180000   2.32401203
  0.19180000   2.32430775
  0.19180000   2.32406380
  0.19180000   2.32426041
  0.19180000   2.32409766
  0.19180000   2.32422829
  0.19180000   2.32411964
  0.19180000   2.32420636
  0.19180000   2.32413376
  0.19180000   2.32419127
  0.19180000   2.32414269
  0.19180000   2.32418077
  0.19180000   2.32414821
  0.19180000   2.32417336
  0.19180000   2.32415149
  0.19180000   2.32416805
  0.19200000   2.32519224
  0.19200000   2.32389119
  0.19200000   2.32495374
  0.19200000   2.32407866
  0.19200000   2.32479246
  0.19200000   2.32420381
  0.19200000   2.32468323
  0.19200000   2.32428718
  0.19200000   2.32460908
  0.19200000   2.32434254
  0.19200000   2.32455860
  0.19200000   2.32437914
  0.19200000   2.32452408
  0.19200000   2.32440319
  0.19200000   2.32450036
  0.19200000   2.32441886
  0.19200000   2.32448394
  0.19200000   2.32442893
  0.19200000   2.32447246
  0.19200000   2.32443528
  0.19200000   2.32446434
  0.19200000   2.32443917
  0.19200000   2.32445851
  0.19220000   2.32551329
  0.19220000   2.32414906
  0.19220000   2.32526863
  0.19220000   2.32434255
  0.19220000   2.32510170
  0.19220000   2.32447297
  0.19220000   2.32498764
  0.19220000   2.32456072
  0.19220000   2.32490955
  0.19220000   2.32461960
  0.19220000   2.32485595
  0.19220000   2.32465895
  0.19220000   2.32481903
  0.19220000   2.32468511
  0.19220000   2.32479346
  0.19220000   2.32470238
  0.19220000   2.32477565
  0.19220000   2.32471364
  0.19220000   2.32476314
  0.19220000   2.32472088
  0.19220000   2.32475426
  0.19220000   2.32472541
  0.19220000   2.32474788
  0.19240000   2.32583100
  0.19240000   2.32440718
  0.19240000   2.32558127
  0.19240000   2.32460582
  0.19240000   2.32540935
  0.19240000   2.32474101
  0.19240000   2.32529085
  0.19240000   2.32483286
  0.19240000   2.32520902
  0.19240000   2.32489512
  0.19240000   2.32515239
  0.19240000   2.32493718
  0.19240000   2.32511307
  0.19240000   2.32496545
  0.19240000   2.32508564
  0.19240000   2.32498434
  0.19240000   2.32506641
  0.19240000   2.32499684
  0.19240000   2.32505283
  0.19240000   2.32500500
  0.19240000   2.32504315
  0.19240000   2.32501022
  0.19240000   2.32503617
  0.19260000   2.32614458
  0.19260000   2.32466624
  0.19260000   2.32589107
  0.19260000   2.32486898
  0.19260000   2.32571500
  0.19260000   2.32500828
  0.19260000   2.32559256
  0.19260000   2.32510385
  0.19260000   2.32550729
  0.19260000   2.32516928
  0.19260000   2.32544778
  0.19260000   2.32521393
  0.19260000   2.32540613
  0.19260000   2.32524429
  0.19260000   2.32537686
  0.19260000   2.32526480
  0.19260000   2.32535619
  0.19260000   2.32527856
  0.19260000   2.32534151
  0.19260000   2.32528767
  0.19260000   2.32533099
  0.19260000   2.32529362
  0.19260000   2.32532338
  0.19280000   2.32645311
  0.19280000   2.32492706
  0.19280000   2.32619735
  0.19280000   2.32513264
  0.19280000   2.32601813
  0.19280000   2.32527524
  0.19280000   2.32589242
  0.19280000   2.32537402
  0.19280000   2.32580410
  0.19280000   2.32544230
  0.19280000   2.32574195
  0.19280000   2.32548938
  0.19280000   2.32569809
  0.19280000   2.32552172
  0.19280000   2.32566703
  0.19280000   2.32554383
  0.19280000   2.32564495
  0.19280000   2.32555884
  0.19280000   2.32562916
  0.19280000   2.32556892
  0.19280000   2.32561778
  0.19280000   2.32557561
  0.19280000   2.32560952
  0.19300000   2.32675553
  0.19300000   2.32519059
  0.19300000   2.32649930
  0.19300000   2.32539754
  0.19300000   2.32631815
  0.19300000   2.32554243
  0.19300000   2.32618996
  0.19300000   2.32564375
  0.19300000   2.32609913
  0.19300000   2.32571447
  0.19300000   2.32603466
  0.19300000   2.32576372
  0.19300000   2.32598879
  0.19300000   2.32579790
  0.19300000   2.32595606
  0.19300000   2.32582152
  0.19300000   2.32593261
  0.19300000   2.32583775
  0.19300000   2.32591573
  0.19300000   2.32584880
  0.19300000   2.32590351
  0.19300000   2.32585624
  0.19300000   2.32589458
  0.19320000   2.32705064
  0.19320000   2.32545792
  0.19320000   2.32679595
  0.19320000   2.32566452
  0.19320000   2.32661431
  0.19320000   2.32581052
  0.19320000   2.32648463
  0.19320000   2.32591356
  0.19320000   2.32639196
  0.19320000   2.32598617
  0.19320000   2.32632561
  0.19320000   2.32603723
  0.19320000   2.32627802
  0.19320000   2.32607303
  0.19320000   2.32624379
  0.19320000   2.32609803
  0.19320000   2.32621908
  0.19320000   2.32611539
  0.19320000   2.32620117
  0.19320000   2.32612737
  0.19320000   2.32618811
  0.19320000   2.32613555
  0.19320000   2.32617852
  0.19340000   2.32733704
  0.19340000   2.32573033
  0.19340000   2.32708622
  0.19340000   2.32593459
  0.19340000   2.32690574
  0.19340000   2.32608026
  0.19340000   2.32677577
  0.19340000   2.32618403
  0.19340000   2.32668208
  0.19340000   2.32625785
  0.19340000   2.32661443
  0.19340000   2.32631025
  0.19340000   2.32656550
  0.19340000   2.32634735
  0.19340000   2.32653002
  0.19340000   2.32637352
  0.19340000   2.32650421
  0.19340000   2.32639191
  0.19340000   2.32648536
  0.19340000   2.32640474
  0.19340000   2.32647153
  0.19340000   2.32641361
  0.19340000   2.32646131
  0.19360000   2.32761316
  0.19360000   2.32600924
  0.19360000   2.32736880
  0.19360000   2.32620891
  0.19360000   2.32719143
  0.19360000   2.32635260
  0.19360000   2.32706257
  0.19360000   2.32645590
  0.19360000   2.32696887
  0.19360000   2.32653006
  0.19360000   2.32690064
  0.19360000   2.32658320
  0.19360000   2.32685087
  0.19360000   2.32662119
  0.19360000   2.32681448
  0.19360000   2.32664826
  0.19360000   2.32678780
  0.19360000   2.32666747
  0.19360000   2.32676817
  0.19360000   2.32668103
  0.19360000   2.32675366
  0.19360000   2.32669052
  0.19360000   2.32674288
  0.19380000   2.32787722
  0.19380000   2.32629631
  0.19380000   2.32764224
  0.19380000   2.32648882
  0.19380000   2.32747017
  0.19380000   2.32662862
  0.19380000   2.32734408
  0.19380000   2.32673003
  0.19380000   2.32725158
  0.19380000   2.32680350
  0.19380000   2.32718364
  0.19380000   2.32685663
  0.19380000   2.32713366
  0.19380000   2.32689497
  0.19380000   2.32709682
  0.19380000   2.32692256
  0.19380000   2.32706959
  0.19380000   2.32694233
  0.19380000   2.32704940
  0.19380000   2.32695643
  0.19380000   2.32703436
  0.19380000   2.32696642
  0.19380000   2.32702311
  0.19400000   2.32812723
  0.19400000   2.32659338
  0.19400000   2.32790486
  0.19400000   2.32677589
  0.19400000   2.32774059
  0.19400000   2.32690959
  0.19400000   2.32761915
  0.19400000   2.32700745
  0.19400000   2.32752929
  0.19400000   2.32707899
  0.19400000   2.32746272
  0.19400000   2.32713119
  0.19400000   2.32741332
  0.19400000   2.32716920
  0.19400000   2.32737660
  0.19400000   2.32719681
  0.19400000   2.32734924
  0.19400000   2.32721679
  0.19400000   2.32732878
  0.19400000   2.32723119
  0.19400000   2.32731343
  0.19400000   2.32724149
  0.19400000   2.32730187
  0.19420000   2.32836094
  0.19420000   2.32690256
  0.19420000   2.32815473
  0.19420000   2.32707187
  0.19420000   2.32800106
  0.19420000   2.32719700
  0.19420000   2.32788646
  0.19420000   2.32728939
  0.19420000   2.32780092
  0.19420000   2.32735752
  0.19420000   2.32773699
  0.19420000   2.32740768
  0.19420000   2.32768914
  0.19420000   2.32744453
  0.19420000   2.32765327
  0.19420000   2.32747154
  0.19420000   2.32762630
  0.19420000   2.32749126
  0.19420000   2.32760598
  0.19420000   2.32750561
  0.19420000   2.32759061
  0.19420000   2.32751598
  0.19420000   2.32757894
  0.19440000   2.32857583
  0.19440000   2.32722620
  0.19440000   2.32838968
  0.19440000   2.32737881
  0.19440000   2.32824974
  0.19440000   2.32749256
  0.19440000   2.32814446
  0.19440000   2.32757728
  0.19440000   2.32806517
  0.19440000   2.32764029
  0.19440000   2.32800540
  0.19440000   2.32768707
  0.19440000   2.32796026
  0.19440000   2.32772174
  0.19440000   2.32792612
  0.19440000   2.32774737
  0.19440000   2.32790023
  0.19440000   2.32776625
  0.19440000   2.32788056
  0.19440000   2.32778010
  0.19440000   2.32786555
  0.19440000   2.32779021
  0.19440000   2.32785406
  0.19460000   2.32876913
  0.19460000   2.32756693
  0.19460000   2.32860727
  0.19460000   2.32769898
  0.19460000   2.32848451
  0.19460000   2.32779825
  0.19460000   2.32839133
  0.19460000   2.32787279
  0.19460000   2.32832053
  0.19460000   2.32792869
  0.19460000   2.32826666
  0.19460000   2.32797054
  0.19460000   2.32822562
  0.19460000   2.32800181
  0.19460000   2.32819429
  0.19460000   2.32802511
  0.19460000   2.32817032
  0.19460000   2.32804240
  0.19460000   2.32815194
  0.19460000   2.32805520
  0.19460000   2.32813779
  0.19460000   2.32806461
  0.19460000   2.32812686
  0.19480000   2.32893774
  0.19480000   2.32792767
  0.19480000   2.32880474
  0.19480000   2.32803499
  0.19480000   2.32870296
  0.19480000   2.32811632
  0.19480000   2.32862499
  0.19480000   2.32817788
  0.19480000   2.32856520
  0.19480000   2.32822440
  0.19480000   2.32851928
  0.19480000   2.32825949
  0.19480000   2.32848396
  0.19480000   2.32828589
  0.19480000   2.32845674
  0.19480000   2.32830571
  0.19480000   2.32843571
  0.19480000   2.32832052
  0.19480000   2.32841942
  0.19480000   2.32833155
  0.19480000   2.32840676
  0.19480000   2.32833970
  0.19480000   2.32839688
  0.19500000   2.32907825
  0.19500000   2.32831165
  0.19500000   2.32897901
  0.19500000   2.32838974
  0.19500000   2.32890234
  0.19500000   2.32844936
  0.19500000   2.32884303
  0.19500000   2.32849479
  0.19500000   2.32879710
  0.19500000   2.32852934
  0.19500000   2.32876146
  0.19500000   2.32855557
  0.19500000   2.32873376
  0.19500000   2.32857541
  0.19500000   2.32871218
  0.19500000   2.32859037
  0.19500000   2.32869531
  0.19500000   2.32860160
  0.19500000   2.32868210
  0.19500000   2.32860997
  0.19500000   2.32867171
  0.19500000   2.32861618
  0.19500000   2.32866350
  0.19520000   2.32918692
  0.19520000   2.32872246
  0.19520000   2.32912664
  0.19520000   2.32876650
  0.19520000   2.32907955
  0.19520000   2.32880028
  0.19520000   2.32904271
  0.19520000   2.32882611
  0.19520000   2.32901381
  0.19520000   2.32884580
  0.19520000   2.32899110
  0.19520000   2.32886076
  0.19520000   2.32897320
  0.19520000   2.32887205
  0.19520000   2.32895905
  0.19520000   2.32888053
  0.19520000   2.32894782
  0.19520000   2.32888685
  0.19520000   2.32893887
  0.19520000   2.32889151
  0.19520000   2.32893171
  0.19520000   2.32889490
  0.19520000   2.32892595
  0.19540000   2.32925966
  0.19540000   2.32916400
  0.19540000   2.32924382
  0.19540000   2.32916890
  0.19540000   2.32923112
  0.19540000   2.32917240
  0.19540000   2.32922087
  0.19540000   2.32917482
  0.19540000   2.32921255
  0.19540000   2.32917640
  0.19540000   2.32920574
  0.19540000   2.32917735
  0.19540000   2.32920014
  0.19540000   2.32917782
  0.19540000   2.32919551
  0.19540000   2.32917793
  0.19540000   2.32919163
  0.19540000   2.32917778
  0.19540000   2.32918837
  0.19540000   2.32917744
  0.19540000   2.32918560
  0.19540000   2.32917696
  0.19540000   2.32918324
  0.19560000   2.32929200
  0.19560000   2.32964053
  0.19560000   2.32932636
  0.19560000   2.32960092
  0.19560000   2.32935315
  0.19560000   2.32956941
  0.19560000   2.32937397
  0.19560000   2.32954427
  0.19560000   2.32939009
  0.19560000   2.32952418
  0.19560000   2.32940252
  0.19560000   2.32950807
  0.19560000   2.32941205
  0.19560000   2.32949511
  0.19560000   2.32941932
  0.19560000   2.32948466
  0.19560000   2.32942481
  0.19560000   2.32947619
  0.19560000   2.32942892
  0.19560000   2.32946931
  0.19560000   2.32943195
  0.19560000   2.32946368
  0.19560000   2.32943414
  0.19580000   2.32927912
  0.19580000   2.33015668
  0.19580000   2.32936962
  0.19580000   2.33006701
  0.19580000   2.32944129
  0.19580000   2.32999545
  0.19580000   2.32949798
  0.19580000   2.32993830
  0.19580000   2.32954277
  0.19580000   2.32989260
  0.19580000   2.32957811
  0.19580000   2.32985603
  0.19580000   2.32960595
  0.19580000   2.32982671
  0.19580000   2.32962785
  0.19580000   2.32980319
  0.19580000   2.32964503
  0.19580000   2.32978428
  0.19580000   2.32965848
  0.19580000   2.32976905
  0.19580000   2.32966897
  0.19580000   2.32975675
  0.19580000   2.32967713
  0.19600000   2.32921581
  0.19600000   2.33071745
  0.19600000   2.32936857
  0.19600000   2.33057199
  0.19600000   2.32949074
  0.19600000   2.33045513
  0.19600000   2.32958840
  0.19600000   2.33036119
  0.19600000   2.32966642
  0.19600000   2.33028565
  0.19600000   2.32972871
  0.19600000   2.33022486
  0.19600000   2.32977839
  0.19600000   2.33017592
  0.19600000   2.32981799
  0.19600000   2.33013647
  0.19600000   2.32984952
  0.19600000   2.33010466
  0.19600000   2.32987460
  0.19600000   2.33007897
  0.19600000   2.32989450
  0.19600000   2.33005820
  0.19600000   2.32991029
  0.19620000   2.32909648
  0.19620000   2.33132815
  0.19620000   2.32931770
  0.19620000   2.33112111
  0.19620000   2.32949620
  0.19620000   2.33095350
  0.19620000   2.32964020
  0.19620000   2.33081777
  0.19620000   2.32975632
  0.19620000   2.33070783
  0.19620000   2.32984993
  0.19620000   2.33061874
  0.19620000   2.32992535
  0.19620000   2.33054653
  0.19620000   2.32998609
  0.19620000   2.33048796
  0.19620000   2.33003498
  0.19620000   2.33044045
  0.19620000   2.33007430
  0.19620000   2.33040186
  0.19620000   2.33010591
  0.19620000   2.33037052
  0.19620000   2.33013128
  0.19640000   2.32891519
  0.19640000   2.33199448
  0.19640000   2.32921107
  0.19640000   2.33172007
  0.19640000   2.32945185
  0.19640000   2.33149614
  0.19640000   2.32964777
  0.19640000   2.33131339
  0.19640000   2.32980716
  0.19640000   2.33116421
  0.19640000   2.32993679
  0.19640000   2.33104242
  0.19640000   2.33004220
  0.19640000   2.33094297
  0.19640000   2.33012789
  0.19640000   2.33086173
  0.19640000   2.33019752
  0.19640000   2.33079536
  0.19640000   2.33025408
  0.19640000   2.33074110
  0.19640000   2.33030000
  0.19640000   2.33069673
  0.19640000   2.33033725
  0.19660000   2.32866564
  0.19660000   2.33272241
  0.19660000   2.32904230
  0.19660000   2.33237494
  0.19660000   2.32935136
  0.19660000   2.33208910
  0.19660000   2.32960494
  0.19660000   2.33185395
  0.19660000   2.32981299
  0.19660000   2.33166049
  0.19660000   2.32998365
  0.19660000   2.33150131
  0.19660000   2.33012364
  0.19660000   2.33137031
  0.19660000   2.33023844
  0.19660000   2.33126250
  0.19660000   2.33033257
  0.19660000   2.33117374
  0.19660000   2.33040972
  0.19660000   2.33110066
  0.19660000   2.33047295
  0.19660000   2.33104047
  0.19660000   2.33052474
  0.19680000   2.32834121
  0.19680000   2.33351818
  0.19680000   2.32880458
  0.19680000   2.33309221
  0.19680000   2.32918787
  0.19680000   2.33273894
  0.19680000   2.32950493
  0.19680000   2.33244597
  0.19680000   2.32976720
  0.19680000   2.33220300
  0.19680000   2.32998416
  0.19680000   2.33200148
  0.19680000   2.33016361
  0.19680000   2.33183435
  0.19680000   2.33031204
  0.19680000   2.33169571
  0.19680000   2.33043478
  0.19680000   2.33158071
  0.19680000   2.33053628
  0.19680000   2.33148528
  0.19680000   2.33062019
  0.19680000   2.33140610
  0.19680000   2.33068954
  0.19700000   2.32793499
  0.19700000   2.33438827
  0.19700000   2.32849069
  0.19700000   2.33387869
  0.19700000   2.32895399
  0.19700000   2.33345266
  0.19700000   2.32934032
  0.19700000   2.33309648
  0.19700000   2.32966249
  0.19700000   2.33279871
  0.19700000   2.32993118
  0.19700000   2.33254978
  0.19700000   2.33015526
  0.19700000   2.33234166
  0.19700000   2.33034214
  0.19700000   2.33216766
  0.19700000   2.33049799
  0.19700000   2.33202218
  0.19700000   2.33062794
  0.19700000   2.33190054
  0.19700000   2.33073630
  0.19700000   2.33179881
  0.19700000   2.33082664
  0.19720000   2.32743987
  0.19720000   2.33533928
  0.19720000   2.32809304
  0.19720000   2.33474152
  0.19720000   2.32864186
  0.19720000   2.33423773
  0.19720000   2.32910312
  0.19720000   2.33381313
  0.19720000   2.32949085
  0.19720000   2.33345531
  0.19720000   2.32981681
  0.19720000   2.33315375
  0.19720000   2.33009087
  0.19720000   2.33289963
  0.19720000   2.33032129
  0.19720000   2.33268548
  0.19720000   2.33051504
  0.19720000   2.33250501
  0.19720000   2.33067794
  0.19720000   2.33235291
  0.19720000   2.33081490
  0.19720000   2.33222473
  0.19720000   2.33093004
  0.19740000   2.32684854
  0.19740000   2.33637788
  0.19740000   2.32760373
  0.19740000   2.33568803
  0.19740000   2.32824315
  0.19740000   2.33510195
  0.19740000   2.32878472
  0.19740000   2.33460406
  0.19740000   2.32924354
  0.19740000   2.33418108
  0.19740000   2.32963232
  0.19740000   2.33382176
  0.19740000   2.32996181
  0.19740000   2.33351654
  0.19740000   2.33024107
  0.19740000   2.33325726
  0.19740000   2.33047778
  0.19740000   2.33303703
  0.19740000   2.33067843
  0.19740000   2.33284995
  0.19740000   2.33084851
  0.19740000   2.33269104
  0.19740000   2.33099267
  0.19760000   2.32615365
  0.19760000   2.33751068
  0.19760000   2.32701464
  0.19760000   2.33672567
  0.19760000   2.32774913
  0.19760000   2.33605347
  0.19760000   2.32837597
  0.19760000   2.33547786
  0.19760000   2.32891114
  0.19760000   2.33498495
  0.19760000   2.32936816
  0.19760000   2.33456289
  0.19760000   2.32975853
  0.19760000   2.33420151
  0.19760000   2.33009201
  0.19760000   2.33389208
  0.19760000   2.33037694
  0.19760000   2.33362714
  0.19760000   2.33062039
  0.19760000   2.33340031
  0.19760000   2.33082841
  0.19760000   2.33320611
  0.19760000   2.33100618
  0.19780000   2.32534784
  0.19780000   2.33874413
  0.19780000   2.32631749
  0.19780000   2.33786192
  0.19780000   2.32715076
  0.19780000   2.33710058
  0.19780000   2.32786724
  0.19780000   2.33644351
  0.19780000   2.32848358
  0.19780000   2.33587641
  0.19780000   2.32901397
  0.19780000   2.33538696
  0.19780000   2.32947051
  0.19780000   2.33496454
  0.19780000   2.32986358
  0.19780000   2.33459999
  0.19780000   2.33020205
  0.19780000   2.33428538
  0.19780000   2.33049354
  0.19780000   2.33401388
  0.19780000   2.33074460
  0.19780000   2.33377959
  0.19780000   2.33096085
  0.19800000   2.32442392
  0.19800000   2.34008437
  0.19800000   2.32550397
  0.19800000   2.33910410
  0.19800000   2.32643879
  0.19800000   2.33825165
  0.19800000   2.32724849
  0.19800000   2.33751024
  0.19800000   2.32795021
  0.19800000   2.33686535
  0.19800000   2.32855862
  0.19800000   2.33630441
  0.19800000   2.32908633
  0.19800000   2.33581647
  0.19800000   2.32954415
  0.19800000   2.33539205
  0.19800000   2.32994144
  0.19800000   2.33502288
  0.19800000   2.33028625
  0.19800000   2.33470179
  0.19800000   2.33058557
  0.19800000   2.33442251
  0.19800000   2.33084542
  0.19820000   2.32337494
  0.19820000   2.34153709
  0.19820000   2.32456589
  0.19820000   2.34045924
  0.19820000   2.32560390
  0.19820000   2.33951491
  0.19820000   2.32650941
  0.19820000   2.33868736
  0.19820000   2.32729989
  0.19820000   2.33796202
  0.19820000   2.32799032
  0.19820000   2.33732621
  0.19820000   2.32859365
  0.19820000   2.33676886
  0.19820000   2.32912104
  0.19820000   2.33628026
  0.19820000   2.32958219
  0.19820000   2.33585194
  0.19820000   2.32998551
  0.19820000   2.33547646
  0.19820000   2.33033832
  0.19820000   2.33514732
  0.19820000   2.33064698
  0.19840000   2.32219440
  0.19840000   2.34310730
  0.19840000   2.32349532
  0.19840000   2.34193386
  0.19840000   2.32463686
  0.19840000   2.34089830
  0.19840000   2.32563960
  0.19840000   2.33998408
  0.19840000   2.32652116
  0.19840000   2.33917676
  0.19840000   2.32729671
  0.19840000   2.33846370
  0.19840000   2.32797939
  0.19840000   2.33783383
  0.19840000   2.32858057
  0.19840000   2.33727741
  0.19840000   2.32911018
  0.19840000   2.33678585
  0.19840000   2.32957688
  0.19840000   2.33635159
  0.19840000   2.32998824
  0.19840000   2.33596795
  0.19840000   2.33035090
  0.19860000   2.32087635
  0.19860000   2.34479926
  0.19860000   2.32228479
  0.19860000   2.34353381
  0.19860000   2.32352870
  0.19860000   2.34240922
  0.19860000   2.32462870
  0.19860000   2.34140927
  0.19860000   2.32560242
  0.19860000   2.34051978
  0.19860000   2.32646507
  0.19860000   2.33972832
  0.19860000   2.32722983
  0.19860000   2.33902394
  0.19860000   2.32790819
  0.19860000   2.33839697
  0.19860000   2.32851019
  0.19860000   2.33783886
  0.19860000   2.32904461
  0.19860000   2.33734201
  0.19860000   2.32951918
  0.19860000   2.33689969
  0.19860000   2.32994072
  0.19880000   2.31941560
  0.19880000   2.34661620
  0.19880000   2.32092745
  0.19880000   2.34526402
  0.19880000   2.32227098
  0.19880000   2.34405428
  0.19880000   2.32346670
  0.19880000   2.34297118
  0.19880000   2.32453217
  0.19880000   2.34200091
  0.19880000   2.32548252
  0.19880000   2.34113135
  0.19880000   2.32633087
  0.19880000   2.34035179
  0.19880000   2.32708869
  0.19880000   2.33965277
  0.19880000   2.32776602
  0.19880000   2.33902585
  0.19880000   2.32837168
  0.19880000   2.33846353
  0.19880000   2.32891346
  0.19880000   2.33795911
  0.19880000   2.32939825
  0.19900000   2.31780787
  0.19900000   2.34856025
  0.19900000   2.31941732
  0.19900000   2.34712829
  0.19900000   2.32085597
  0.19900000   2.34583904
  0.19900000   2.32214416
  0.19900000   2.34467714
  0.19900000   2.32329930
  0.19900000   2.34362923
  0.19900000   2.32433634
  0.19900000   2.34268356
  0.19900000   2.32526828
  0.19900000   2.34182977
  0.19900000   2.32610645
  0.19900000   2.34105867
  0.19900000   2.32686080
  0.19900000   2.34036205
  0.19900000   2.32754009
  0.19900000   2.33973261
  0.19900000   2.32815209
  0.19900000   2.33916376
  0.19900000   2.32870368
  0.19920000   2.31604993
  0.19920000   2.35063219
  0.19920000   2.31774947
  0.19920000   2.34912910
  0.19920000   2.31927694
  0.19920000   2.34776774
  0.19920000   2.32065252
  0.19920000   2.34653326
  0.19920000   2.32189340
  0.19920000   2.34541271
  0.19920000   2.32301433
  0.19920000   2.34439481
  0.19920000   2.32402810
  0.19920000   2.34346956
  0.19920000   2.32494583
  0.19920000   2.34262812
  0.19920000   2.32577732
  0.19920000   2.34186259
  0.19920000   2.32653119
  0.19920000   2.34116592
  0.19920000   2.32721509
  0.19920000   2.34053176
  0.19920000   2.32783581
  0.19940000   2.31413980
  0.19940000   2.35283138
  0.19940000   2.31592022
  0.19940000   2.35126736
  0.19940000   2.31752841
  0.19940000   2.34984306
  0.19940000   2.31898441
  0.19940000   2.34854404
  0.19940000   2.32030516
  0.19940000   2.34735783
  0.19940000   2.32150520
  0.19940000   2.34627355
  0.19940000   2.32259705
  0.19940000   2.34528163
  0.19940000   2.32359164
  0.19940000   2.34437360
  0.19940000   2.32449851
  0.19940000   2.34354192
  0.19940000   2.32532611
  0.19940000   2.34277982
  0.19940000   2.32608189
  0.19940000   2.34208125
  0.19940000   2.32677252
  0.19960000   2.31207683
  0.19960000   2.35515567
  0.19960000   2.31392735
  0.19960000   2.35354231
  0.19960000   2.31560642
  0.19960000   2.35206582
  0.19960000   2.31713395
  0.19960000   2.35071212
  0.19960000   2.31852671
  0.19960000   2.34946914
  0.19960000   2.31979900
  0.19960000   2.34832640
  0.19960000   2.32096310
  0.19960000   2.34727473
  0.19960000   2.32202968
  0.19960000   2.34630602
  0.19960000   2.32300805
  0.19960000   2.34541311
  0.19960000   2.32390642
  0.19960000   2.34458956
  0.19960000   2.32473204
  0.19960000   2.34382961
  0.19960000   2.32549136
  0.19980000   2.30986182
  0.19980000   2.35760130
  0.19980000   2.31177024
  0.19980000   2.35595138
  0.19980000   2.31350873
  0.19980000   2.35443485
  0.19980000   2.31509713
  0.19980000   2.35303795
  0.19980000   2.31655208
  0.19980000   2.35174891
  0.19980000   2.31788766
  0.19980000   2.35055761
  0.19980000   2.31911596
  0.19980000   2.34945522
  0.19980000   2.32024739
  0.19980000   2.34843400
  0.19980000   2.32129105
  0.19980000   2.34748711
  0.19980000   2.32225489
  0.19980000   2.34660844
  0.19980000   2.32314594
  0.19980000   2.34579256
  0.19980000   2.32397044
  0.20000000   2.30749709
  0.20000000   2.36016295
  0.20000000   2.30945002
  0.20000000   2.35849011
  0.20000000   2.31123506
  0.20000000   2.35694683
  0.20000000   2.31287203
  0.20000000   2.35551954
  0.20000000   2.31437750
  0.20000000   2.35419676
  0.20000000   2.31576542
  0.20000000   2.35296861
  0.20000000   2.31704770
  0.20000000   2.35182656
  0.20000000   2.31823456
  0.20000000   2.35076316
  0.20000000   2.31933487
  0.20000000   2.34977188
  0.20000000   2.32035637
  0.20000000   2.34884689
  0.20000000   2.32130588
  0.20000000   2.34798306
  0.20000000   2.32218941
  0.20020000   2.30498649
  0.20020000   2.36283374
  0.20020000   2.30696964
  0.20020000   2.36115215
  0.20020000   2.30878719
  0.20020000   2.35959617
  0.20020000   2.31045907
  0.20020000   2.35815238
  0.20020000   2.31200181
  0.20020000   2.35680943
  0.20020000   2.31342930
  0.20020000   2.35555766
  0.20020000   2.31475333
  0.20020000   2.35438875
  0.20020000   2.31598398
  0.20020000   2.35329549
  0.20020000   2.31712995
  0.20020000   2.35227157
  0.20020000   2.31819879
  0.20020000   2.35131143
  0.20020000   2.31919713
  0.20020000   2.35041015
  0.20020000   2.32013081
  0.20040000   2.30233538
  0.20040000   2.36560540
  0.20040000   2.30433386
  0.20040000   2.36392936
  0.20040000   2.30616910
  0.20040000   2.36237512
  0.20040000   2.30786117
  0.20040000   2.36092929
  0.20040000   2.30942667
  0.20040000   2.35958063
  0.20040000   2.31087947
  0.20040000   2.35831957
  0.20040000   2.31223131
  0.20040000   2.35713796
  0.20040000   2.31349217
  0.20040000   2.35602874
  0.20040000   2.31467064
  0.20040000   2.35498577
  0.20040000   2.31577414
  0.20040000   2.35400370
  0.20040000   2.31680915
  0.20040000   2.35307778
  0.20040000   2.31778137
  0.20060000   2.29955057
  0.20060000   2.36846836
  0.20060000   2.30154926
  0.20060000   2.36681194
  0.20060000   2.30338693
  0.20060000   2.36527381
  0.20060000   2.30508385
  0.20060000   2.36384057
  0.20060000   2.30665675
  0.20060000   2.36250097
  0.20060000   2.30811954
  0.20060000   2.36124555
  0.20060000   2.30948394
  0.20060000   2.36006622
  0.20060000   2.31075990
  0.20060000   2.35895602
  0.20060000   2.31195595
  0.20060000   2.35790895
  0.20060000   2.31307943
  0.20060000   2.35691975
  0.20060000   2.31413673
  0.20060000   2.35598381
  0.20060000   2.31513343
  0.20080000   2.29664017
  0.20080000   2.37141198
  0.20080000   2.29862408
  0.20080000   2.36978864
  0.20080000   2.30044891
  0.20080000   2.36828050
  0.20080000   2.30213518
  0.20080000   2.36687409
  0.20080000   2.30369975
  0.20080000   2.36555820
  0.20080000   2.30515664
  0.20080000   2.36432334
  0.20080000   2.30651760
  0.20080000   2.36316147
  0.20080000   2.30779259
  0.20080000   2.36206570
  0.20080000   2.30899011
  0.20080000   2.36103008
  0.20080000   2.31011747
  0.20080000   2.36004945
  0.20080000   2.31118100
  0.20080000   2.35911927
  0.20080000   2.31218621
  0.20100000   2.29361346
  0.20100000   2.37442483
  0.20100000   2.29556810
  0.20100000   2.37284701
  0.20100000   2.29736523
  0.20100000   2.37138182
  0.20100000   2.29902563
  0.20100000   2.37001570
  0.20100000   2.30056632
  0.20100000   2.36873740
  0.20100000   2.30200145
  0.20100000   2.36753742
  0.20100000   2.30334283
  0.20100000   2.36640774
  0.20100000   2.30460046
  0.20100000   2.36534150
  0.20100000   2.30578284
  0.20100000   2.36433277
  0.20100000   2.30689728
  0.20100000   2.36337645
  0.20100000   2.30795008
  0.20100000   2.36246804
  0.20100000   2.30894673
  0.20120000   2.29048067
  0.20120000   2.37749488
  0.20120000   2.29239241
  0.20120000   2.37597378
  0.20120000   2.29414778
  0.20120000   2.37456320
  0.20120000   2.29576784
  0.20120000   2.37324954
  0.20120000   2.29726981
  0.20120000   2.37202148
  0.20120000   2.29866793
  0.20120000   2.37086952
  0.20120000   2.29997413
  0.20120000   2.36978562
  0.20120000   2.30119842
  0.20120000   2.36876295
  0.20120000   2.30234936
  0.20120000   2.36779560
  0.20120000   2.30343425
  0.20120000   2.36687849
  0.20120000   2.30445939
  0.20120000   2.36600717
  0.20120000   2.30543025
  0.20140000   2.28725277
  0.20140000   2.38060987
  0.20140000   2.28910912
  0.20140000   2.37915511
  0.20140000   2.29080986
  0.20140000   2.37780924
  0.20140000   2.29237631
  0.20140000   2.37655856
  0.20140000   2.29382589
  0.20140000   2.37539172
  0.20140000   2.29517296
  0.20140000   2.37429920
  0.20140000   2.29642953
  0.20140000   2.37327297
  0.20140000   2.29760567
  0.20140000   2.37230618
  0.20140000   2.29870997
  0.20140000   2.37139297
  0.20140000   2.29974973
  0.20140000   2.37052827
  0.20140000   2.30073126
  0.20140000   2.36970766
  0.20140000   2.30166003
  0.20160000   2.28394124
  0.20160000   2.38375751
  0.20160000   2.28573112
  0.20160000   2.38237702
  0.20160000   2.28736582
  0.20160000   2.38110413
  0.20160000   2.28886694
  0.20160000   2.37992505
  0.20160000   2.29025209
  0.20160000   2.37882840
  0.20160000   2.29153575
  0.20160000   2.37780464
  0.20160000   2.29273001
  0.20160000   2.37684575
  0.20160000   2.29384499
  0.20160000   2.37594489
  0.20160000   2.29488929
  0.20160000   2.37509623
  0.20160000   2.29587024
  0.20160000   2.37429470
  0.20160000   2.29679416
  0.20160000   2.37353594
  0.20160000   2.29766649
  0.20180000   2.28055781
  0.20180000   2.38692576
  0.20180000   2.28227172
  0.20180000   2.38562569
  0.20180000   2.28383069
  0.20180000   2.38443211
  0.20180000   2.28525661
  0.20180000   2.38333117
  0.20180000   2.28656725
  0.20180000   2.38231146
  0.20180000   2.28777723
  0.20180000   2.38136342
  0.20180000   2.28889869
  0.20180000   2.38047905
  0.20180000   2.28994181
  0.20180000   2.37965151
  0.20180000   2.29091523
  0.20180000   2.37887500
  0.20180000   2.29182628
  0.20180000   2.37814448
  0.20180000   2.29268126
  0.20180000   2.37745562
  0.20180000   2.29348564
  0.20200000   2.27711424
  0.20200000   2.39010312
  0.20200000   2.27874439
  0.20200000   2.38888777
  0.20200000   2.28021982
  0.20200000   2.38777786
  0.20200000   2.28156267
  0.20200000   2.38675948
  0.20200000   2.28279091
  0.20200000   2.38582116
  0.20200000   2.28391926
  0.20200000   2.38495335
  0.20200000   2.28495996
  0.20200000   2.38414803
  0.20200000   2.28592324
  0.20200000   2.38339841
  0.20200000   2.28681773
  0.20200000   2.38269867
  0.20200000   2.28765080
  0.20200000   2.38204384
  0.20200000   2.28842875
  0.20200000   2.38142958
  0.20200000   2.28915703
  0.20220000   2.27362207
  0.20220000   2.39327874
  0.20220000   2.27516245
  0.20220000   2.39215068
  0.20220000   2.27654845
  0.20220000   2.39112689
  0.20220000   2.27780248
  0.20220000   2.39019339
  0.20220000   2.27894270
  0.20220000   2.38933868
  0.20220000   2.27998397
  0.20220000   2.38855318
  0.20220000   2.28093859
  0.20220000   2.38782888
  0.20220000   2.28181685
  0.20220000   2.38715899
  0.20220000   2.28262741
  0.20220000   2.38653773
  0.20220000   2.28337766
  0.20220000   2.38596013
  0.20220000   2.28407390
  0.20220000   2.38542190
  0.20220000   2.28472157
  0.20240000   2.27009248
  0.20240000   2.39644264
  0.20240000   2.27153883
  0.20240000   2.39540277
  0.20240000   2.27283143
  0.20240000   2.39446577
  0.20240000   2.27399299
  0.20240000   2.39361755
  0.20240000   2.27504185
  0.20240000   2.39284657
  0.20240000   2.27599300
  0.20240000   2.39214324
  0.20240000   2.27685885
  0.20240000   2.39149955
  0.20240000   2.27764971
  0.20240000   2.39090871
  0.20240000   2.27837432
  0.20240000   2.39036495
  0.20240000   2.27904005
  0.20240000   2.38986333
  0.20240000   2.27965323
  0.20240000   2.38939957
  0.20240000   2.28021930
  0.20260000   2.26653609
  0.20260000   2.39958580
  0.20260000   2.26788582
  0.20260000   2.39863356
  0.20260000   2.26908289
  0.20260000   2.39778239
  0.20260000   2.27015032
  0.20260000   2.39701813
  0.20260000   2.27110662
  0.20260000   2.39632918
  0.20260000   2.27196693
  0.20260000   2.39570595
  0.20260000   2.27274373
  0.20260000   2.39514041
  0.20260000   2.27344742
  0.20260000   2.39462578
  0.20260000   2.27408675
  0.20260000   2.39415631
  0.20260000   2.27466913
  0.20260000   2.39372706
  0.20260000   2.27520089
  0.20260000   2.39333380
  0.20260000   2.27568746
  0.20280000   2.26296281
  0.20280000   2.40270024
  0.20280000   2.26421492
  0.20280000   2.40183376
  0.20280000   2.26531605
  0.20280000   2.40106611
  0.20280000   2.26628949
  0.20280000   2.40038303
  0.20280000   2.26715398
  0.20280000   2.39977289
  0.20280000   2.26792476
  0.20280000   2.39922609
  0.20280000   2.26861440
  0.20280000   2.39873458
  0.20280000   2.26923337
  0.20280000   2.39829163
  0.20280000   2.26979043
  0.20280000   2.39789149
  0.20280000   2.27029300
  0.20280000   2.39752928
  0.20280000   2.27074741
  0.20280000   2.39720077
  0.20280000   2.27115909
  0.20300000   2.25938180
  0.20300000   2.40577905
  0.20300000   2.26053671
  0.20300000   2.40499539
  0.20300000   2.26154299
  0.20300000   2.40430779
  0.20300000   2.26242421
  0.20300000   2.40370195
  0.20300000   2.26319928
  0.20300000   2.40316620
  0.20300000   2.26388358
  0.20300000   2.40269094
  0.20300000   2.26448974
  0.20300000   2.40226816
  0.20300000   2.26502823
  0.20300000   2.40189115
  0.20300000   2.26550785
  0.20300000   2.40155422
  0.20300000   2.26593599
  0.20300000   2.40125252
  0.20300000   2.26631894
  0.20300000   2.40098191
  0.20300000   2.26666209
  0.20320000   2.25580135
  0.20320000   2.40881636
  0.20320000   2.25686072
  0.20320000   2.40811171
  0.20320000   2.25777455
  0.20320000   2.40749985
  0.20320000   2.25856666
  0.20320000   2.40696642
  0.20320000   2.25925611
  0.20320000   2.40649979
  0.20320000   2.25985835
  0.20320000   2.40609036
  0.20320000   2.26038606
  0.20320000   2.40573020
  0.20320000   2.26084969
  0.20320000   2.40541265
  0.20320000   2.26125799
  0.20320000   2.40513211
  0.20320000   2.26161831
  0.20320000   2.40488384
  0.20320000   2.26193686
  0.20320000   2.40466376
  0.20320000   2.26221895
  0.20340000   2.25222890
  0.20340000   2.41180736
  0.20340000   2.25319546
  0.20340000   2.41117726
  0.20340000   2.25402031
  0.20340000   2.41063616
  0.20340000   2.25472749
  0.20340000   2.41016974
  0.20340000   2.25533617
  0.20340000   2.40976639
  0.20340000   2.25586181
  0.20340000   2.40941660
  0.20340000   2.25631706
  0.20340000   2.40911253
  0.20340000   2.25671232
  0.20340000   2.40884765
  0.20340000   2.25705624
  0.20340000   2.40861648
  0.20340000   2.25735605
  0.20340000   2.40841440
  0.20340000   2.25761784
  0.20340000   2.40823751
  0.20340000   2.25784676
  0.20360000   2.24867098
  0.20360000   2.41474817
  0.20360000   2.24954832
  0.20360000   2.41418771
  0.20360000   2.25028854
  0.20360000   2.41371202
  0.20360000   2.25091579
  0.20360000   2.41330684
  0.20360000   2.25144929
  0.20360000   2.41296068
  0.20360000   2.25190446
  0.20360000   2.41266415
  0.20360000   2.25229384
  0.20360000   2.41240957
  0.20360000   2.25262771
  0.20360000   2.41219058
  0.20360000   2.25291453
  0.20360000   2.41200188
  0.20360000   2.25316137
  0.20360000   2.41183903
  0.20360000   2.25337411
  0.20360000   2.41169830
  0.20360000   2.25355771
  0.20380000   2.24513329
  0.20380000   2.41763584
  0.20380000   2.24592568
  0.20380000   2.41713982
  0.20380000   2.24658622
  0.20380000   2.41672397
  0.20380000   2.24713912
  0.20380000   2.41637415
  0.20380000   2.24760352
  0.20380000   2.41607903
  0.20380000   2.24799472
  0.20380000   2.41582945
  0.20380000   2.24832508
  0.20380000   2.41561793
  0.20380000   2.24860464
  0.20380000   2.41543834
  0.20380000   2.24884165
  0.20380000   2.41528560
  0.20380000   2.24904289
  0.20380000   2.41515551
  0.20380000   2.24921401
  0.20380000   2.41504457
  0.20380000   2.24935969
  0.20400000   2.24162066
  0.20400000   2.42046822
  0.20400000   2.24233289
  0.20400000   2.42003132
  0.20400000   2.24291915
  0.20400000   2.41966969
  0.20400000   2.24340360
  0.20400000   2.41936939
  0.20400000   2.24380521
  0.20400000   2.41911935
  0.20400000   2.24413906
  0.20400000   2.41891066
  0.20400000   2.24441721
  0.20400000   2.41873613
  0.20400000   2.24464942
  0.20400000   2.41858990
  0.20400000   2.24484359
  0.20400000   2.41846718
  0.20400000   2.24500620
  0.20400000   2.41836405
  0.20400000   2.24514257
  0.20400000   2.41827724
  0.20400000   2.24525705
  0.20420000   2.23813719
  0.20420000   2.42324385
  0.20420000   2.23877438
  0.20420000   2.42286078
  0.20420000   2.23929200
  0.20420000   2.42254785
  0.20420000   2.23971405
  0.20420000   2.42229145
  0.20420000   2.24005921
  0.20420000   2.42208079
  0.20420000   2.24034221
  0.20420000   2.42190733
  0.20420000   2.24057474
  0.20420000   2.42176420
  0.20420000   2.24076617
  0.20420000   2.42164588
  0.20420000   2.24092400
  0.20420000   2.42154790
  0.20420000   2.24105434
  0.20420000   2.42146663
  0.20420000   2.24116210
  0.20420000   2.42139912
  0.20420000   2.24125132
  0.20440000   2.23468623
  0.20440000   2.42596194
  0.20440000   2.23525370
  0.20440000   2.42562750
  0.20440000   2.23570844
  0.20440000   2.42535798
  0.20440000   2.23607411
  0.20440000   2.42514012
  0.20440000   2.23636900
  0.20440000   2.42496355
  0.20440000   2.23660739
  0.20440000   2.42482013
  0.20440000   2.23680050
  0.20440000   2.42470337
  0.20440000   2.23695721
  0.20440000   2.42460813
  0.20440000   2.23708460
  0.20440000   2.42453030
  0.20440000   2.23718831
  0.20440000   2.42446656
  0.20440000   2.23727286
  0.20440000   2.42441427
  0.20440000   2.23734189
  0.20460000   2.23127048
  0.20460000   2.42862222
  0.20460000   2.23177364
  0.20460000   2.42833142
  0.20460000   2.23217120
  0.20460000   2.42810027
  0.20460000   2.23248636
  0.20460000   2.42791599
  0.20460000   2.23273690
  0.20460000   2.42776868
  0.20460000   2.23293652
  0.20460000   2.42765062
  0.20460000   2.23309591
  0.20460000   2.42755580
  0.20460000   2.23322341
  0.20460000   2.42747945
  0.20460000   2.23332558
  0.20460000   2.42741784
  0.20460000   2.23340758
  0.20460000   2.42736800
  0.20460000   2.23347351
  0.20460000   2.42732758
  0.20460000   2.23352662
  0.20480000   2.22789206
  0.20480000   2.43122487
  0.20480000   2.22833628
  0.20480000   2.43097297
  0.20480000   2.22868223
  0.20480000   2.43077551
  0.20480000   2.22895251
  0.20480000   2.43062026
  0.20480000   2.22916424
  0.20480000   2.43049783
  0.20480000   2.22933049
  0.20480000   2.43040103
  0.20480000   2.22946131
  0.20480000   2.43032427
  0.20480000   2.22956445
  0.20480000   2.43026324
  0.20480000   2.22964594
  0.20480000   2.43021457
  0.20480000   2.22971044
  0.20480000   2.43017563
  0.20480000   2.22976160
  0.20480000   2.43014436
  0.20480000   2.22980228
  0.20500000   2.22455256
  0.20500000   2.43377045
  0.20500000   2.22494312
  0.20500000   2.43355301
  0.20500000   2.22524281
  0.20500000   2.43338494
  0.20500000   2.22547349
  0.20500000   2.43325460
  0.20500000   2.22565153
  0.20500000   2.43315318
  0.20500000   2.22578929
  0.20500000   2.43307403
  0.20500000   2.22589611
  0.20500000   2.43301203
  0.20500000   2.22597915
  0.20500000   2.43296330
  0.20500000   2.22604384
  0.20500000   2.43292485
  0.20500000   2.22609436
  0.20500000   2.43289438
  0.20500000   2.22613393
  0.20500000   2.43287012
  0.20500000   2.22616501
  0.20520000   2.22125312
  0.20520000   2.43625983
  0.20520000   2.22159510
  0.20520000   2.43607274
  0.20520000   2.22185359
  0.20520000   2.43593013
  0.20520000   2.22204958
  0.20520000   2.43582102
  0.20520000   2.22219861
  0.20520000   2.43573721
  0.20520000   2.22231223
  0.20520000   2.43567260
  0.20520000   2.22239908
  0.20520000   2.43562257
  0.20520000   2.22246565
  0.20520000   2.43558365
  0.20520000   2.22251683
  0.20520000   2.43555321
  0.20520000   2.22255629
  0.20520000   2.43552926
  0.20520000   2.22258684
  0.20520000   2.43551030
  0.20520000   2.22261059
  0.20540000   2.21799448
  0.20540000   2.43869413
  0.20540000   2.21829274
  0.20540000   2.43853361
  0.20540000   2.21851476
  0.20540000   2.43841292
  0.20540000   2.21868057
  0.20540000   2.43832178
  0.20540000   2.21880479
  0.20540000   2.43825264
  0.20540000   2.21889812
  0.20540000   2.43819993
  0.20540000   2.21896846
  0.20540000   2.43815952
  0.20540000   2.21902166
  0.20540000   2.43812835
  0.20540000   2.21906205
  0.20540000   2.43810414
  0.20540000   2.21909285
  0.20540000   2.43808519
  0.20540000   2.21911644
  0.20540000   2.43807022
  0.20540000   2.21913462
  0.20560000   2.21477702
  0.20560000   2.44107463
  0.20560000   2.21503616
  0.20560000   2.44093726
  0.20560000   2.21522611
  0.20560000   2.44083534
  0.20560000   2.21536583
  0.20560000   2.44075932
  0.20560000   2.21546896
  0.20560000   2.44070230
  0.20560000   2.21554536
  0.20560000   2.44065926
  0.20560000   2.21560217
  0.20560000   2.44062654
  0.20560000   2.21564460
  0.20560000   2.44060146
  0.20560000   2.21567644
  0.20560000   2.44058205
  0.20560000   2.21570048
  0.20560000   2.44056689
  0.20560000   2.21571875
  0.20560000   2.44055490
  0.20560000   2.21573275
  0.20580000   2.21160087
  0.20580000   2.44340277
  0.20580000   2.21182517
  0.20580000   2.44328546
  0.20580000   2.21198707
  0.20580000   2.44319951
  0.20580000   2.21210438
  0.20580000   2.44313614
  0.20580000   2.21218972
  0.20580000   2.44308908
  0.20580000   2.21225208
  0.20580000   2.44305385
  0.20580000   2.21229787
  0.20580000   2.44302723
  0.20580000   2.21233168
  0.20580000   2.44300690
  0.20580000   2.21235680
  0.20580000   2.44299119
  0.20580000   2.21237563
  0.20580000   2.44297889
  0.20580000   2.21238985
  0.20580000   2.44296911
  0.20580000   2.21240071
  0.20600000   2.20846589
  0.20600000   2.44568010
  0.20600000   2.20865934
  0.20600000   2.44558008
  0.20600000   2.20879684
  0.20600000   2.44550765
  0.20600000   2.20889501
  0.20600000   2.44545480
  0.20600000   2.20896544
  0.20600000   2.44541587
  0.20600000   2.20901623
  0.20600000   2.44538691
  0.20600000   2.20905310
  0.20600000   2.44536510
  0.20600000   2.20908006
  0.20600000   2.44534846
  0.20600000   2.20909994
  0.20600000   2.44533556
  0.20600000   2.20911475
  0.20600000   2.44532541
  0.20600000   2.20912592
  0.20600000   2.44531727
  0.20600000   2.20913445
  0.20620000   2.20537173
  0.20620000   2.44790822
  0.20620000   2.20553801
  0.20620000   2.44782302
  0.20620000   2.20565441
  0.20620000   2.44776198
  0.20620000   2.20573633
  0.20620000   2.44771783
  0.20620000   2.20579432
  0.20620000   2.44768551
  0.20620000   2.20583565
  0.20620000   2.44766155
  0.20620000   2.20586535
  0.20620000   2.44764352
  0.20620000   2.20588690
  0.20620000   2.44762971
  0.20620000   2.20590271
  0.20620000   2.44761895
  0.20620000   2.20591446
  0.20620000   2.44761040
  0.20620000   2.20592333
  0.20620000   2.44760348
  0.20620000   2.20593013
  0.20640000   2.20231789
  0.20640000   2.45008878
  0.20640000   2.20246035
  0.20640000   2.45001622
  0.20640000   2.20255861
  0.20640000   2.44996472
  0.20640000   2.20262680
  0.20640000   2.44992772
  0.20640000   2.20267449
  0.20640000   2.44990075
  0.20640000   2.20270812
  0.20640000   2.44988076
  0.20640000   2.20273209
  0.20640000   2.44986567
  0.20640000   2.20274939
  0.20640000   2.44985405
  0.20640000   2.20276205
  0.20640000   2.44984490
  0.20640000   2.20277148
  0.20640000   2.44983756
  0.20640000   2.20277863
  0.20640000   2.44983152
  0.20640000   2.20278416
  0.20660000   2.19930374
  0.20660000   2.45222343
  0.20660000   2.19942543
  0.20660000   2.45216160
  0.20660000   2.19950815
  0.20660000   2.45211806
  0.20660000   2.19956483
  0.20660000   2.45208691
  0.20660000   2.19960402
  0.20660000   2.45206423
  0.20660000   2.19963143
  0.20660000   2.45204738
  0.20660000   2.19965085
  0.20660000   2.45203458
  0.20660000   2.19966482
  0.20660000   2.45202463
  0.20660000   2.19967507
  0.20660000   2.45201671
  0.20660000   2.19968274
  0.20660000   2.45201025
  0.20660000   2.19968860
  0.20660000   2.45200487
  0.20660000   2.19969319
  0.20680000   2.19632853
  0.20680000   2.45431382
  0.20680000   2.19643219
  0.20680000   2.45426108
  0.20680000   2.19650169
  0.20680000   2.45422413
  0.20680000   2.19654875
  0.20680000   2.45419774
  0.20680000   2.19658099
  0.20680000   2.45417850
  0.20680000   2.19660338
  0.20680000   2.45416411
  0.20680000   2.19661920
  0.20680000   2.45415309
  0.20680000   2.19663059
  0.20680000   2.45414441
  0.20680000   2.19663899
  0.20680000   2.45413740
  0.20680000   2.19664533
  0.20680000   2.45413161
  0.20680000   2.19665023
  0.20680000   2.45412672
  0.20680000   2.19665413
  0.20700000   2.19339143
  0.20700000   2.45636161
  0.20700000   2.19347951
  0.20700000   2.45631649
  0.20700000   2.19353783
  0.20700000   2.45628498
  0.20700000   2.19357690
  0.20700000   2.45626247
  0.20700000   2.19360346
  0.20700000   2.45624595
  0.20700000   2.19362184
  0.20700000   2.45623350
  0.20700000   2.19363483
  0.20700000   2.45622385
  0.20700000   2.19364422
  0.20700000   2.45621614
  0.20700000   2.19365121
  0.20700000   2.45620983
  0.20700000   2.19365654
  0.20700000   2.45620453
  0.20700000   2.19366072
  0.20700000   2.45620000
  0.20700000   2.19366411
  0.20720000   2.19049155
  0.20720000   2.45836839
  0.20720000   2.19056625
  0.20720000   2.45832966
  0.20720000   2.19061514
  0.20720000   2.45830262
  0.20720000   2.19064761
  0.20720000   2.45828322
  0.20720000   2.19066957
  0.20720000   2.45826888
  0.20720000   2.19068475
  0.20720000   2.45825794
  0.20720000   2.19069551
  0.20720000   2.45824934
  0.20720000   2.19070336
  0.20720000   2.45824237
  0.20720000   2.19070926
  0.20720000   2.45823658
  0.20720000   2.19071384
  0.20720000   2.45823166
  0.20720000   2.19071749
  0.20720000   2.45822740
  0.20720000   2.19072049
  0.20740000   2.18762794
  0.20740000   2.46033573
  0.20740000   2.18769120
  0.20740000   2.46030233
  0.20740000   2.18773219
  0.20740000   2.46027895
  0.20740000   2.18775923
  0.20740000   2.46026206
  0.20740000   2.18777747
  0.20740000   2.46024943
  0.20740000   2.18779012
  0.20740000   2.46023967
  0.20740000   2.18779914
  0.20740000   2.46023188
  0.20740000   2.18780580
  0.20740000   2.46022548
  0.20740000   2.18781088
  0.20740000   2.46022009
  0.20740000   2.18781488
  0.20740000   2.46021545
  0.20740000   2.18781813
  0.20740000   2.46021140
  0.20740000   2.18782083
  0.20760000   2.18479964
  0.20760000   2.46226517
  0.20760000   2.18485317
  0.20760000   2.46223618
  0.20760000   2.18488756
  0.20760000   2.46221578
  0.20760000   2.18491016
  0.20760000   2.46220089
  0.20760000   2.18492542
  0.20760000   2.46218962
  0.20760000   2.18493605
  0.20760000   2.46218078
  0.20760000   2.18494373
  0.20760000   2.46217362
  0.20760000   2.18494947
  0.20760000   2.46216765
  0.20760000   2.18495391
  0.20760000   2.46216256
  0.20760000   2.18495748
  0.20760000   2.46215815
  0.20760000   2.18496041
  0.20760000   2.46215425
  0.20760000   2.18496290
  0.20780000   2.18200565
  0.20780000   2.46415817
  0.20780000   2.18205094
  0.20780000   2.46413283
  0.20780000   2.18207986
  0.20780000   2.46411485
  0.20780000   2.18209884
  0.20780000   2.46410156
  0.20780000   2.18211171
  0.20780000   2.46409136
  0.20780000   2.18212076
  0.20780000   2.46408323
  0.20780000   2.18212738
  0.20780000   2.46407655
  0.20780000   2.18213241
  0.20780000   2.46407092
  0.20780000   2.18213637
  0.20780000   2.46406607
  0.20780000   2.18213960
  0.20780000   2.46406182
  0.20780000   2.18214230
  0.20780000   2.46405805
  0.20780000   2.18214461
  0.20800000   2.17924499
  0.20800000   2.46601615
  0.20800000   2.17928333
  0.20800000   2.46599382
  0.20800000   2.17930773
  0.20800000   2.46597779
  0.20800000   2.17932378
  0.20800000   2.46596578
  0.20800000   2.17933473
  0.20800000   2.46595641
  0.20800000   2.17934254
  0.20800000   2.46594884
  0.20800000   2.17934833
  0.20800000   2.46594254
  0.20800000   2.17935282
  0.20800000   2.46593717
  0.20800000   2.17935641
  0.20800000   2.46593251
  0.20800000   2.17935937
  0.20800000   2.46592840
  0.20800000   2.17936188
  0.20800000   2.46592473
  0.20800000   2.17936405
  0.20820000   2.17651665
  0.20820000   2.46784049
  0.20820000   2.17654917
  0.20820000   2.46782061
  0.20820000   2.17656985
  0.20820000   2.46780616
  0.20820000   2.17658352
  0.20820000   2.46779517
  0.20820000   2.17659295
  0.20820000   2.46778646
  0.20820000   2.17659977
  0.20820000   2.46777933
  0.20820000   2.17660493
  0.20820000   2.46777333
  0.20820000   2.17660898
  0.20820000   2.46776816
  0.20820000   2.17661228
  0.20820000   2.46776364
  0.20820000   2.17661504
  0.20820000   2.46775964
  0.20820000   2.17661740
  0.20820000   2.46775606
  0.20820000   2.17661945
  0.20840000   2.17381963
  0.20840000   2.46963248
  0.20840000   2.17384729
  0.20840000   2.46961462
  0.20840000   2.17386492
  0.20840000   2.46960143
  0.20840000   2.17387668
  0.20840000   2.46959125
  0.20840000   2.17388491
  0.20840000   2.46958306
  0.20840000   2.17389096
  0.20840000   2.46957628
  0.20840000   2.17389561
  0.20840000   2.46957051
  0.20840000   2.17389932
  0.20840000   2.46956551
  0.20840000   2.17390239
  0.20840000   2.46956111
  0.20840000   2.17390498
  0.20840000   2.46955720
  0.20840000   2.17390722
  0.20840000   2.46955370
  0.20840000   2.17390917
  0.20860000   2.17115297
  0.20860000   2.47139339
  0.20860000   2.17117658
  0.20860000   2.47137716
  0.20860000   2.17119173
  0.20860000   2.47136499
  0.20860000   2.17120195
  0.20860000   2.47135545
  0.20860000   2.17120922
  0.20860000   2.47134768
  0.20860000   2.17121465
  0.20860000   2.47134117
  0.20860000   2.17121890
  0.20860000   2.47133559
  0.20860000   2.17122235
  0.20860000   2.47133072
  0.20860000   2.17122523
  0.20860000   2.47132643
  0.20860000   2.17122769
  0.20860000   2.47132260
  0.20860000   2.17122982
  0.20860000   2.47131916
  0.20860000   2.17123169
  0.20880000   2.16851569
  0.20880000   2.47312440
  0.20880000   2.16853596
  0.20880000   2.47310950
  0.20880000   2.16854908
  0.20880000   2.47309815
  0.20880000   2.16855807
  0.20880000   2.47308912
  0.20880000   2.16856457
  0.20880000   2.47308168
  0.20880000   2.16856952
  0.20880000   2.47307539
  0.20880000   2.16857346
  0.20880000   2.47306997
  0.20880000   2.16857669
  0.20880000   2.47306521
  0.20880000   2.16857941
  0.20880000   2.47306101
  0.20880000   2.16858175
  0.20880000   2.47305724
  0.20880000   2.16858379
  0.20880000   2.47305386
  0.20880000   2.16858560
  0.20900000   2.16590685
  0.20900000   2.47482665
  0.20900000   2.16592437
  0.20900000   2.47481284
  0.20900000   2.16593585
  0.20900000   2.47480215
  0.20900000   2.16594384
  0.20900000   2.47479353
  0.20900000   2.16594974
  0.20900000   2.47478636
  0.20900000   2.16595430
  0.20900000   2.47478025
  0.20900000   2.16595798
  0.20900000   2.47477495
  0.20900000   2.16596103
  0.20900000   2.47477029
  0.20900000   2.16596363
  0.20900000   2.47476616
  0.20900000   2.16596587
  0.20900000   2.47476246
  0.20900000   2.16596783
  0.20900000   2.47475912
  0.20900000   2.16596957
  0.20920000   2.16332553
  0.20920000   2.47650125
  0.20920000   2.16334079
  0.20920000   2.47648830
  0.20920000   2.16335095
  0.20920000   2.47647814
  0.20920000   2.16335815
  0.20920000   2.47646986
  0.20920000   2.16336355
  0.20920000   2.47646290
  0.20920000   2.16336780
  0.20920000   2.47645694
  0.20920000   2.16337127
  0.20920000   2.47645176
  0.20920000   2.16337417
  0.20920000   2.47644718
  0.20920000   2.16337666
  0.20920000   2.47644311
  0.20920000   2.16337881
  0.20920000   2.47643947
  0.20920000   2.16338071
  0.20920000   2.47643618
  0.20920000   2.16338239
  0.20940000   2.16077086
  0.20940000   2.47814921
  0.20940000   2.16078426
  0.20940000   2.47813697
  0.20940000   2.16079334
  0.20940000   2.47812724
  0.20940000   2.16079990
  0.20940000   2.47811923
  0.20940000   2.16080491
  0.20940000   2.47811245
  0.20940000   2.16080890
  0.20940000   2.47810662
  0.20940000   2.16081220
  0.20940000   2.47810152
  0.20940000   2.16081498
  0.20940000   2.47809702
  0.20940000   2.16081736
  0.20940000   2.47809302
  0.20940000   2.16081944
  0.20940000   2.47808942
  0.20940000   2.16082127
  0.20940000   2.47808617
  0.20940000   2.16082290
  0.20960000   2.15824195
  0.20960000   2.47977152
  0.20960000   2.15825384
  0.20960000   2.47975985
  0.20960000   2.15826205
  0.20960000   2.47975047
  0.20960000   2.15826809
  0.20960000   2.47974268
  0.20960000   2.15827278
  0.20960000   2.47973606
  0.20960000   2.15827656
  0.20960000   2.47973034
  0.20960000   2.15827970
  0.20960000   2.47972533
  0.20960000   2.15828237
  0.20960000   2.47972089
  0.20960000   2.15828468
  0.20960000   2.47971693
  0.20960000   2.15828669
  0.20960000   2.47971338
  0.20960000   2.15828846
  0.20960000   2.47971018
  0.20960000   2.15829004
  0.20980000   2.15573798
  0.20980000   2.48136911
  0.20980000   2.15574863
  0.20980000   2.48135792
  0.20980000   2.15575614
  0.20980000   2.48134882
  0.20980000   2.15576176
  0.20980000   2.48134122
  0.20980000   2.15576618
  0.20980000   2.48133473
  0.20980000   2.15576978
  0.20980000   2.48132910
  0.20980000   2.15577280
  0.20980000   2.48132416
  0.20980000   2.15577537
  0.20980000   2.48131978
  0.20980000   2.15577760
  0.20980000   2.48131588
  0.20980000   2.15577954
  0.20980000   2.48131237
  0.20980000   2.15578126
  0.20980000   2.48130920
  0.20980000   2.15578279
  0.21000000   2.15325813
  0.21000000   2.48294287
  0.21000000   2.15326779
  0.21000000   2.48293207
  0.21000000   2.15327471
  0.21000000   2.48292321
  0.21000000   2.15327999
  0.21000000   2.48291577
  0.21000000   2.15328419
  0.21000000   2.48290938
  0.21000000   2.15328764
  0.21000000   2.48290384
  0.21000000   2.15329054
  0.21000000   2.48289897
  0.21000000   2.15329302
  0.21000000   2.48289465
  0.21000000   2.15329518
  0.21000000   2.48289079
  0.21000000   2.15329707
  0.21000000   2.48288732
  0.21000000   2.15329874
  0.21000000   2.48288419
  0.21000000   2.15330023
  0.21020000   2.15080164
  0.21020000   2.48449365
  0.21020000   2.15081048
  0.21020000   2.48448317
  0.21020000   2.15081693
  0.21020000   2.48447451
  0.21020000   2.15082192
  0.21020000   2.48446720
  0.21020000   2.15082593
  0.21020000   2.48446092
  0.21020000   2.15082925
  0.21020000   2.48445545
  0.21020000   2.15083205
  0.21020000   2.48445064
  0.21020000   2.15083446
  0.21020000   2.48444637
  0.21020000   2.15083655
  0.21020000   2.48444255
  0.21020000   2.15083838
  0.21020000   2.48443912
  0.21020000   2.15084000
  0.21020000   2.48443602
  0.21020000   2.15084145
  0.21040000   2.14836777
  0.21040000   2.48602225
  0.21040000   2.14837593
  0.21040000   2.48601203
  0.21040000   2.14838199
  0.21040000   2.48600354
  0.21040000   2.14838674
  0.21040000   2.48599635
  0.21040000   2.14839058
  0.21040000   2.48599016
  0.21040000   2.14839378
  0.21040000   2.48598475
  0.21040000   2.14839650
  0.21040000   2.48598000
  0.21040000   2.14839883
  0.21040000   2.48597578
  0.21040000   2.14840086
  0.21040000   2.48597200
  0.21040000   2.14840264
  0.21040000   2.48596861
  0.21040000   2.14840422
  0.21040000   2.48596553
  0.21040000   2.14840563
  0.21060000   2.14595578
  0.21060000   2.48752942
  0.21060000   2.14596339
  0.21060000   2.48751942
  0.21060000   2.14596913
  0.21060000   2.48751109
  0.21060000   2.14597367
  0.21060000   2.48750400
  0.21060000   2.14597737
  0.21060000   2.48749788
  0.21060000   2.14598047
  0.21060000   2.48749255
  0.21060000   2.14598310
  0.21060000   2.48748784
  0.21060000   2.14598536
  0.21060000   2.48748367
  0.21060000   2.14598734
  0.21060000   2.48747993
  0.21060000   2.14598907
  0.21060000   2.48747657
  0.21060000   2.14599061
  0.21060000   2.48747352
  0.21060000   2.14599198
  0.21080000   2.14356501
  0.21080000   2.48901589
  0.21080000   2.14357216
  0.21080000   2.48900608
  0.21080000   2.14357762
  0.21080000   2.48899788
  0.21080000   2.14358199
  0.21080000   2.48899088
  0.21080000   2.14358556
  0.21080000   2.48898484
  0.21080000   2.14358856
  0.21080000   2.48897956
  0.21080000   2.14359111
  0.21080000   2.48897491
  0.21080000   2.14359332
  0.21080000   2.48897077
  0.21080000   2.14359524
  0.21080000   2.48896707
  0.21080000   2.14359693
  0.21080000   2.48896374
  0.21080000   2.14359842
  0.21080000   2.48896073
  0.21080000   2.14359976
  0.21100000   2.14119479
  0.21100000   2.49048234
  0.21100000   2.14120155
  0.21100000   2.49047270
  0.21100000   2.14120679
  0.21100000   2.49046461
  0.21100000   2.14121099
  0.21100000   2.49045770
  0.21100000   2.14121445
  0.21100000   2.49045173
  0.21100000   2.14121736
  0.21100000   2.49044651
  0.21100000   2.14121984
  0.21100000   2.49044190
  0.21100000   2.14122199
  0.21100000   2.49043780
  0.21100000   2.14122386
  0.21100000   2.49043414
  0.21100000   2.14122550
  0.21100000   2.49043084
  0.21100000   2.14122696
  0.21100000   2.49042785
  0.21100000   2.14122827
  0.21120000   2.13884449
  0.21120000   2.49192943
  0.21120000   2.13885094
  0.21120000   2.49191993
  0.21120000   2.13885596
  0.21120000   2.49191194
  0.21120000   2.13886003
  0.21120000   2.49190512
  0.21120000   2.13886338
  0.21120000   2.49189921
  0.21120000   2.13886621
  0.21120000   2.49189404
  0.21120000   2.13886863
  0.21120000   2.49188947
  0.21120000   2.13887071
  0.21120000   2.49188542
  0.21120000   2.13887254
  0.21120000   2.49188179
  0.21120000   2.13887414
  0.21120000   2.49187851
  0.21120000   2.13887557
  0.21120000   2.49187555
  0.21120000   2.13887684
  0.21140000   2.13651352
  0.21140000   2.49335777
  0.21140000   2.13651969
  0.21140000   2.49334841
  0.21140000   2.13652454
  0.21140000   2.49334051
  0.21140000   2.13652847
  0.21140000   2.49333376
  0.21140000   2.13653173
  0.21140000   2.49332791
  0.21140000   2.13653448
  0.21140000   2.49332279
  0.21140000   2.13653684
  0.21140000   2.49331827
  0.21140000   2.13653887
  0.21140000   2.49331425
  0.21140000   2.13654065
  0.21140000   2.49331064
  0.21140000   2.13654221
  0.21140000   2.49330740
  0.21140000   2.13654360
  0.21140000   2.49330446
  0.21140000   2.13654484
  0.21160000   2.13420130
  0.21160000   2.49476796
  0.21160000   2.13420722
  0.21160000   2.49475871
  0.21160000   2.13421192
  0.21160000   2.49475091
  0.21160000   2.13421573
  0.21160000   2.49474422
  0.21160000   2.13421890
  0.21160000   2.49473843
  0.21160000   2.13422158
  0.21160000   2.49473335
  0.21160000   2.13422387
  0.21160000   2.49472887
  0.21160000   2.13422586
  0.21160000   2.49472488
  0.21160000   2.13422759
  0.21160000   2.49472131
  0.21160000   2.13422912
  0.21160000   2.49471810
  0.21160000   2.13423047
  0.21160000   2.49471518
  0.21160000   2.13423169
  0.21180000   2.13190727
  0.21180000   2.49616055
  0.21180000   2.13191299
  0.21180000   2.49615142
  0.21180000   2.13191753
  0.21180000   2.49614369
  0.21180000   2.13192124
  0.21180000   2.49613707
  0.21180000   2.13192433
  0.21180000   2.49613133
  0.21180000   2.13192694
  0.21180000   2.49612630
  0.21180000   2.13192918
  0.21180000   2.49612186
  0.21180000   2.13193111
  0.21180000   2.49611790
  0.21180000   2.13193280
  0.21180000   2.49611436
  0.21180000   2.13193429
  0.21180000   2.49611117
  0.21180000   2.13193562
  0.21180000   2.49610828
  0.21180000   2.13193680
  0.21200000   2.12963092
  0.21200000   2.49753609
  0.21200000   2.12963645
  0.21200000   2.49752705
  0.21200000   2.12964086
  0.21200000   2.49751941
  0.21200000   2.12964447
  0.21200000   2.49751285
  0.21200000   2.12964748
  0.21200000   2.49750716
  0.21200000   2.12965002
  0.21200000   2.49750217
  0.21200000   2.12965220
  0.21200000   2.49749776
  0.21200000   2.12965409
  0.21200000   2.49749384
  0.21200000   2.12965575
  0.21200000   2.49749032
  0.21200000   2.12965720
  0.21200000   2.49748716
  0.21200000   2.12965850
  0.21200000   2.49748428
  0.21200000   2.12965966
  0.21220000   2.12737174
  0.21220000   2.49889508
  0.21220000   2.12737710
  0.21220000   2.49888613
  0.21220000   2.12738139
  0.21220000   2.49887856
  0.21220000   2.12738491
  0.21220000   2.49887206
  0.21220000   2.12738784
  0.21220000   2.49886641
  0.21220000   2.12739032
  0.21220000   2.49886147
  0.21220000   2.12739245
  0.21220000   2.49885710
  0.21220000   2.12739430
  0.21220000   2.49885320
  0.21220000   2.12739591
  0.21220000   2.49884972
  0.21220000   2.12739733
  0.21220000   2.49884657
  0.21220000   2.12739860
  0.21220000   2.49884372
  0.21220000   2.12739973
  0.21240000   2.12512926
  0.21240000   2.50023800
  0.21240000   2.12513446
  0.21240000   2.50022914
  0.21240000   2.12513864
  0.21240000   2.50022164
  0.21240000   2.12514206
  0.21240000   2.50021519
  0.21240000   2.12514492
  0.21240000   2.50020959
  0.21240000   2.12514735
  0.21240000   2.50020469
  0.21240000   2.12514942
  0.21240000   2.50020035
  0.21240000   2.12515123
  0.21240000   2.50019649
  0.21240000   2.12515280
  0.21240000   2.50019302
  0.21240000   2.12515420
  0.21240000   2.50018990
  0.21240000   2.12515544
  0.21240000   2.50018707
  0.21240000   2.12515654
  0.21260000   2.12290301
  0.21260000   2.50156533
  0.21260000   2.12290807
  0.21260000   2.50155655
  0.21260000   2.12291213
  0.21260000   2.50154911
  0.21260000   2.12291547
  0.21260000   2.50154272
  0.21260000   2.12291826
  0.21260000   2.50153716
  0.21260000   2.12292063
  0.21260000   2.50153229
  0.21260000   2.12292267
  0.21260000   2.50152799
  0.21260000   2.12292443
  0.21260000   2.50152415
  0.21260000   2.12292597
  0.21260000   2.50152071
  0.21260000   2.12292733
  0.21260000   2.50151761
  0.21260000   2.12292854
  0.21260000   2.50151480
  0.21260000   2.12292963
  0.21280000   2.12069255
  0.21280000   2.50287750
  0.21280000   2.12069747
  0.21280000   2.50286879
  0.21280000   2.12070144
  0.21280000   2.50286142
  0.21280000   2.12070470
  0.21280000   2.50285507
  0.21280000   2.12070743
  0.21280000   2.50284956
  0.21280000   2.12070974
  0.21280000   2.50284473
  0.21280000   2.12071173
  0.21280000   2.50284045
  0.21280000   2.12071345
  0.21280000   2.50283664
  0.21280000   2.12071496
  0.21280000   2.50283323
  0.21280000   2.12071629
  0.21280000   2.50283015
  0.21280000   2.12071748
  0.21280000   2.50282736
  0.21280000   2.12071853
  0.21300000   2.11849747
  0.21300000   2.50417493
  0.21300000   2.11850227
  0.21300000   2.50416630
  0.21300000   2.11850614
  0.21300000   2.50415898
  0.21300000   2.11850932
  0.21300000   2.50415269
  0.21300000   2.11851198
  0.21300000   2.50414722
  0.21300000   2.11851424
  0.21300000   2.50414242
  0.21300000   2.11851619
  0.21300000   2.50413817
  0.21300000   2.11851787
  0.21300000   2.50413439
  0.21300000   2.11851935
  0.21300000   2.50413099
  0.21300000   2.11852065
  0.21300000   2.50412793
  0.21300000   2.11852181
  0.21300000   2.50412516
  0.21300000   2.11852285
  0.21320000   2.11631736
  0.21320000   2.50545803
  0.21320000   2.11632204
  0.21320000   2.50544947
  0.21320000   2.11632582
  0.21320000   2.50544221
  0.21320000   2.11632893
  0.21320000   2.50543596
  0.21320000   2.11633153
  0.21320000   2.50543053
  0.21320000   2.11633375
  0.21320000   2.50542576
  0.21320000   2.11633564
  0.21320000   2.50542155
  0.21320000   2.11633730
  0.21320000   2.50541779
  0.21320000   2.11633874
  0.21320000   2.50541442
  0.21320000   2.11634001
  0.21320000   2.50541137
  0.21320000   2.11634115
  0.21320000   2.50540862
  0.21320000   2.11634217
  0.21340000   2.11415185
  0.21340000   2.50672718
  0.21340000   2.11415641
  0.21340000   2.50671869
  0.21340000   2.11416010
  0.21340000   2.50671148
  0.21340000   2.11416314
  0.21340000   2.50670528
  0.21340000   2.11416569
  0.21340000   2.50669989
  0.21340000   2.11416785
  0.21340000   2.50669515
  0.21340000   2.11416971
  0.21340000   2.50669096
  0.21340000   2.11417132
  0.21340000   2.50668723
  0.21340000   2.11417274
  0.21340000   2.50668388
  0.21340000   2.11417399
  0.21340000   2.50668086
  0.21340000   2.11417510
  0.21340000   2.50667811
  0.21340000   2.11417610
  0.21360000   2.11200055
  0.21360000   2.50798276
  0.21360000   2.11200501
  0.21360000   2.50797434
  0.21360000   2.11200862
  0.21360000   2.50796718
  0.21360000   2.11201159
  0.21360000   2.50796102
  0.21360000   2.11201408
  0.21360000   2.50795567
  0.21360000   2.11201620
  0.21360000   2.50795096
  0.21360000   2.11201801
  0.21360000   2.50794680
  0.21360000   2.11201960
  0.21360000   2.50794309
  0.21360000   2.11202098
  0.21360000   2.50793976
  0.21360000   2.11202221
  0.21360000   2.50793675
  0.21360000   2.11202330
  0.21360000   2.50793402
  0.21360000   2.11202427
  0.21380000   2.10986313
  0.21380000   2.50922512
  0.21380000   2.10986748
  0.21380000   2.50921676
  0.21380000   2.10987101
  0.21380000   2.50920966
  0.21380000   2.10987391
  0.21380000   2.50920354
  0.21380000   2.10987635
  0.21380000   2.50919822
  0.21380000   2.10987842
  0.21380000   2.50919354
  0.21380000   2.10988020
  0.21380000   2.50918941
  0.21380000   2.10988175
  0.21380000   2.50918571
  0.21380000   2.10988311
  0.21380000   2.50918240
  0.21380000   2.10988431
  0.21380000   2.50917942
  0.21380000   2.10988538
  0.21380000   2.50917670
  0.21380000   2.10988633
  0.21400000   2.10773923
  0.21400000   2.51045461
  0.21400000   2.10774349
  0.21400000   2.51044630
  0.21400000   2.10774693
  0.21400000   2.51043925
  0.21400000   2.10774978
  0.21400000   2.51043317
  0.21400000   2.10775216
  0.21400000   2.51042788
  0.21400000   2.10775419
  0.21400000   2.51042323
  0.21400000   2.10775594
  0.21400000   2.51041912
  0.21400000   2.10775746
  0.21400000   2.51041545
  0.21400000   2.10775879
  0.21400000   2.51041216
  0.21400000   2.10775996
  0.21400000   2.51040919
  0.21400000   2.10776101
  0.21400000   2.51040649
  0.21400000   2.10776194
  0.21420000   2.10562854
  0.21420000   2.51167153
  0.21420000   2.10563270
  0.21420000   2.51166329
  0.21420000   2.10563607
  0.21420000   2.51165628
  0.21420000   2.10563886
  0.21420000   2.51165024
  0.21420000   2.10564119
  0.21420000   2.51164498
  0.21420000   2.10564318
  0.21420000   2.51164037
  0.21420000   2.10564489
  0.21420000   2.51163628
  0.21420000   2.10564638
  0.21420000   2.51163263
  0.21420000   2.10564768
  0.21420000   2.51162935
  0.21420000   2.10564883
  0.21420000   2.51162640
  0.21420000   2.10564986
  0.21420000   2.51162372
  0.21420000   2.10565078
  0.21440000   2.10353075
  0.21440000   2.51287622
  0.21440000   2.10353482
  0.21440000   2.51286803
  0.21440000   2.10353811
  0.21440000   2.51286107
  0.21440000   2.10354084
  0.21440000   2.51285507
  0.21440000   2.10354313
  0.21440000   2.51284984
  0.21440000   2.10354507
  0.21440000   2.51284525
  0.21440000   2.10354675
  0.21440000   2.51284118
  0.21440000   2.10354821
  0.21440000   2.51283756
  0.21440000   2.10354949
  0.21440000   2.51283430
  0.21440000   2.10355062
  0.21440000   2.51283136
  0.21440000   2.10355162
  0.21440000   2.51282870
  0.21440000   2.10355252
  0.21460000   2.10144554
  0.21460000   2.51406898
  0.21460000   2.10144953
  0.21460000   2.51406084
  0.21460000   2.10145276
  0.21460000   2.51405392
  0.21460000   2.10145543
  0.21460000   2.51404795
  0.21460000   2.10145767
  0.21460000   2.51404276
  0.21460000   2.10145958
  0.21460000   2.51403819
  0.21460000   2.10146122
  0.21460000   2.51403415
  0.21460000   2.10146265
  0.21460000   2.51403054
  0.21460000   2.10146390
  0.21460000   2.51402730
  0.21460000   2.10146501
  0.21460000   2.51402438
  0.21460000   2.10146599
  0.21460000   2.51402172
  0.21460000   2.10146688
  0.21480000   2.09937265
  0.21480000   2.51525008
  0.21480000   2.09937655
  0.21480000   2.51524199
  0.21480000   2.09937971
  0.21480000   2.51523511
  0.21480000   2.09938232
  0.21480000   2.51522918
  0.21480000   2.09938452
  0.21480000   2.51522401
  0.21480000   2.09938639
  0.21480000   2.51521947
  0.21480000   2.09938800
  0.21480000   2.51521545
  0.21480000   2.09938940
  0.21480000   2.51521186
  0.21480000   2.09939063
  0.21480000   2.51520864
  0.21480000   2.09939172
  0.21480000   2.51520573
  0.21480000   2.09939269
  0.21480000   2.51520309
  0.21480000   2.09939355
  0.21500000   2.09731178
  0.21500000   2.51641981
  0.21500000   2.09731560
  0.21500000   2.51641177
  0.21500000   2.09731870
  0.21500000   2.51640493
  0.21500000   2.09732126
  0.21500000   2.51639903
  0.21500000   2.09732341
  0.21500000   2.51639390
  0.21500000   2.09732525
  0.21500000   2.51638938
  0.21500000   2.09732683
  0.21500000   2.51638538
  0.21500000   2.09732820
  0.21500000   2.51638181
  0.21500000   2.09732940
  0.21500000   2.51637860
  0.21500000   2.09733047
  0.21500000   2.51637571
  0.21500000   2.09733142
  0.21500000   2.51637308
  0.21500000   2.09733227
  0.21520000   2.09526268
  0.21520000   2.51757843
  0.21520000   2.09526642
  0.21520000   2.51757045
  0.21520000   2.09526945
  0.21520000   2.51756364
  0.21520000   2.09527196
  0.21520000   2.51755778
  0.21520000   2.09527408
  0.21520000   2.51755267
  0.21520000   2.09527587
  0.21520000   2.51754818
  0.21520000   2.09527742
  0.21520000   2.51754420
  0.21520000   2.09527877
  0.21520000   2.51754065
  0.21520000   2.09527995
  0.21520000   2.51753745
  0.21520000   2.09528100
  0.21520000   2.51753457
  0.21520000   2.09528193
  0.21520000   2.51753196
  0.21520000   2.09528277
  0.21540000   2.09322508
  0.21540000   2.51872621
  0.21540000   2.09322874
  0.21540000   2.51871827
  0.21540000   2.09323172
  0.21540000   2.51871151
  0.21540000   2.09323418
  0.21540000   2.51870568
  0.21540000   2.09323625
  0.21540000   2.51870059
  0.21540000   2.09323802
  0.21540000   2.51869613
  0.21540000   2.09323953
  0.21540000   2.51869216
  0.21540000   2.09324086
  0.21540000   2.51868863
  0.21540000   2.09324202
  0.21540000   2.51868545
  0.21540000   2.09324304
  0.21540000   2.51868259
  0.21540000   2.09324396
  0.21540000   2.51867998
  0.21540000   2.09324478
  0.21560000   2.09119874
  0.21560000   2.51986339
  0.21560000   2.09120233
  0.21560000   2.51985550
  0.21560000   2.09120525
  0.21560000   2.51984878
  0.21560000   2.09120766
  0.21560000   2.51984297
  0.21560000   2.09120969
  0.21560000   2.51983792
  0.21560000   2.09121142
  0.21560000   2.51983347
  0.21560000   2.09121292
  0.21560000   2.51982953
  0.21560000   2.09121421
  0.21560000   2.51982601
  0.21560000   2.09121535
  0.21560000   2.51982285
  0.21560000   2.09121636
  0.21560000   2.51982000
  0.21560000   2.09121726
  0.21560000   2.51981740
  0.21560000   2.09121806
  0.21580000   2.08918343
  0.21580000   2.52099022
  0.21580000   2.08918694
  0.21580000   2.52098237
  0.21580000   2.08918980
  0.21580000   2.52097568
  0.21580000   2.08919217
  0.21580000   2.52096991
  0.21580000   2.08919416
  0.21580000   2.52096488
  0.21580000   2.08919586
  0.21580000   2.52096045
  0.21580000   2.08919732
  0.21580000   2.52095653
  0.21580000   2.08919860
  0.21580000   2.52095303
  0.21580000   2.08919972
  0.21580000   2.52094988
  0.21580000   2.08920071
  0.21580000   2.52094704
  0.21580000   2.08920159
  0.21580000   2.52094446
  0.21580000   2.08920238
  0.21600000   2.08717890
  0.21600000   2.52210692
  0.21600000   2.08718235
  0.21600000   2.52209911
  0.21600000   2.08718515
  0.21600000   2.52209246
  0.21600000   2.08718747
  0.21600000   2.52208671
  0.21600000   2.08718943
  0.21600000   2.52208171
  0.21600000   2.08719110
  0.21600000   2.52207730
  0.21600000   2.08719253
  0.21600000   2.52207340
  0.21600000   2.08719378
  0.21600000   2.52206991
  0.21600000   2.08719488
  0.21600000   2.52206678
  0.21600000   2.08719585
  0.21600000   2.52206395
  0.21600000   2.08719672
  0.21600000   2.52206138
  0.21600000   2.08719749
  0.21620000   2.08518494
  0.21620000   2.52321372
  0.21620000   2.08518832
  0.21620000   2.52320595
  0.21620000   2.08519107
  0.21620000   2.52319933
  0.21620000   2.08519335
  0.21620000   2.52319361
  0.21620000   2.08519527
  0.21620000   2.52318863
  0.21620000   2.08519690
  0.21620000   2.52318425
  0.21620000   2.08519832
  0.21620000   2.52318036
  0.21620000   2.08519954
  0.21620000   2.52317689
  0.21620000   2.08520062
  0.21620000   2.52317377
  0.21620000   2.08520158
  0.21620000   2.52317095
  0.21620000   2.08520243
  0.21620000   2.52316840
  0.21620000   2.08520319
  0.21640000   2.08320134
  0.21640000   2.52431082
  0.21640000   2.08320465
  0.21640000   2.52430310
  0.21640000   2.08320735
  0.21640000   2.52429651
  0.21640000   2.08320959
  0.21640000   2.52429082
  0.21640000   2.08321147
  0.21640000   2.52428586
  0.21640000   2.08321308
  0.21640000   2.52428150
  0.21640000   2.08321446
  0.21640000   2.52427763
  0.21640000   2.08321567
  0.21640000   2.52427417
  0.21640000   2.08321673
  0.21640000   2.52427107
  0.21640000   2.08321767
  0.21640000   2.52426826
  0.21640000   2.08321850
  0.21640000   2.52426572
  0.21640000   2.08321925
  0.21660000   2.08122788
  0.21660000   2.52539845
  0.21660000   2.08123113
  0.21660000   2.52539077
  0.21660000   2.08123378
  0.21660000   2.52538421
  0.21660000   2.08123598
  0.21660000   2.52537855
  0.21660000   2.08123783
  0.21660000   2.52537361
  0.21660000   2.08123940
  0.21660000   2.52536927
  0.21660000   2.08124076
  0.21660000   2.52536541
  0.21660000   2.08124195
  0.21660000   2.52536197
  0.21660000   2.08124299
  0.21660000   2.52535888
  0.21660000   2.08124391
  0.21660000   2.52535609
  0.21660000   2.08124473
  0.21660000   2.52535355
  0.21660000   2.08124547
  0.21680000   2.07926438
  0.21680000   2.52647680
  0.21680000   2.07926757
  0.21680000   2.52646915
  0.21680000   2.07927017
  0.21680000   2.52646263
  0.21680000   2.07927232
  0.21680000   2.52645699
  0.21680000   2.07927414
  0.21680000   2.52645208
  0.21680000   2.07927569
  0.21680000   2.52644775
  0.21680000   2.07927702
  0.21680000   2.52644392
  0.21680000   2.07927819
  0.21680000   2.52644049
  0.21680000   2.07927921
  0.21680000   2.52643741
  0.21680000   2.07928011
  0.21680000   2.52643463
  0.21680000   2.07928092
  0.21680000   2.52643210
  0.21680000   2.07928164
  0.21700000   2.07731063
  0.21700000   2.52754606
  0.21700000   2.07731376
  0.21700000   2.52753845
  0.21700000   2.07731631
  0.21700000   2.52753196
  0.21700000   2.07731843
  0.21700000   2.52752635
  0.21700000   2.07732021
  0.21700000   2.52752146
  0.21700000   2.07732173
  0.21700000   2.52751715
  0.21700000   2.07732304
  0.21700000   2.52751333
  0.21700000   2.07732419
  0.21700000   2.52750992
  0.21700000   2.07732519
  0.21700000   2.52750685
  0.21700000   2.07732608
  0.21700000   2.52750408
  0.21700000   2.07732687
  0.21700000   2.52750156
  0.21700000   2.07732758
  0.21720000   2.07536644
  0.21720000   2.52860643
  0.21720000   2.07536952
  0.21720000   2.52859886
  0.21720000   2.07537202
  0.21720000   2.52859239
  0.21720000   2.07537410
  0.21720000   2.52858681
  0.21720000   2.07537585
  0.21720000   2.52858194
  0.21720000   2.07537735
  0.21720000   2.52857765
  0.21720000   2.07537863
  0.21720000   2.52857384
  0.21720000   2.07537976
  0.21720000   2.52857044
  0.21720000   2.07538075
  0.21720000   2.52856739
  0.21720000   2.07538162
  0.21720000   2.52856463
  0.21720000   2.07538240
  0.21720000   2.52856212
  0.21720000   2.07538309
  0.21740000   2.07343165
  0.21740000   2.52965809
  0.21740000   2.07343466
  0.21740000   2.52965055
  0.21740000   2.07343712
  0.21740000   2.52964411
  0.21740000   2.07343917
  0.21740000   2.52963855
  0.21740000   2.07344089
  0.21740000   2.52963370
  0.21740000   2.07344235
  0.21740000   2.52962943
  0.21740000   2.07344362
  0.21740000   2.52962564
  0.21740000   2.07344472
  0.21740000   2.52962225
  0.21740000   2.07344570
  0.21740000   2.52961921
  0.21740000   2.07344655
  0.21740000   2.52961646
  0.21740000   2.07344732
  0.21740000   2.52961396
  0.21740000   2.07344800
  0.21760000   2.07150606
  0.21760000   2.53070120
  0.21760000   2.07150903
  0.21760000   2.53069370
  0.21760000   2.07151144
  0.21760000   2.53068729
  0.21760000   2.07151345
  0.21760000   2.53068175
  0.21760000   2.07151514
  0.21760000   2.53067692
  0.21760000   2.07151658
  0.21760000   2.53067267
  0.21760000   2.07151782
  0.21760000   2.53066889
  0.21760000   2.07151891
  0.21760000   2.53066552
  0.21760000   2.07151986
  0.21760000   2.53066248
  0.21760000   2.07152071
  0.21760000   2.53065974
  0.21760000   2.07152146
  0.21760000   2.53065725
  0.21760000   2.07152213
  0.21780000   2.06958953
  0.21780000   2.53173595
  0.21780000   2.06959243
  0.21780000   2.53172848
  0.21780000   2.06959481
  0.21780000   2.53172210
  0.21780000   2.06959678
  0.21780000   2.53171658
  0.21780000   2.06959844
  0.21780000   2.53171177
  0.21780000   2.06959985
  0.21780000   2.53170753
  0.21780000   2.06960108
  0.21780000   2.53170377
  0.21780000   2.06960215
  0.21780000   2.53170041
  0.21780000   2.06960308
  0.21780000   2.53169739
  0.21780000   2.06960391
  0.21780000   2.53169466
  0.21780000   2.06960465
  0.21780000   2.53169218
  0.21780000   2.06960531
  0.21800000   2.06768187
  0.21800000   2.53276250
  0.21800000   2.06768472
  0.21800000   2.53275506
  0.21800000   2.06768705
  0.21800000   2.53274870
  0.21800000   2.06768899
  0.21800000   2.53274321
  0.21800000   2.06769062
  0.21800000   2.53273842
  0.21800000   2.06769201
  0.21800000   2.53273420
  0.21800000   2.06769322
  0.21800000   2.53273045
  0.21800000   2.06769426
  0.21800000   2.53272710
  0.21800000   2.06769518
  0.21800000   2.53272409
  0.21800000   2.06769600
  0.21800000   2.53272137
  0.21800000   2.06769673
  0.21800000   2.53271890
  0.21800000   2.06769738
  0.21820000   2.06578293
  0.21820000   2.53378100
  0.21820000   2.06578573
  0.21820000   2.53377359
  0.21820000   2.06578802
  0.21820000   2.53376726
  0.21820000   2.06578992
  0.21820000   2.53376179
  0.21820000   2.06579153
  0.21820000   2.53375702
  0.21820000   2.06579290
  0.21820000   2.53375281
  0.21820000   2.06579408
  0.21820000   2.53374908
  0.21820000   2.06579511
  0.21820000   2.53374574
  0.21820000   2.06579601
  0.21820000   2.53374274
  0.21820000   2.06579682
  0.21820000   2.53374003
  0.21820000   2.06579753
  0.21820000   2.53373757
  0.21820000   2.06579817
  0.21840000   2.06389255
  0.21840000   2.53479161
  0.21840000   2.06389531
  0.21840000   2.53478424
  0.21840000   2.06389756
  0.21840000   2.53477794
  0.21840000   2.06389943
  0.21840000   2.53477249
  0.21840000   2.06390100
  0.21840000   2.53476773
  0.21840000   2.06390235
  0.21840000   2.53476354
  0.21840000   2.06390351
  0.21840000   2.53475982
  0.21840000   2.06390453
  0.21840000   2.53475650
  0.21840000   2.06390542
  0.21840000   2.53475351
  0.21840000   2.06390620
  0.21840000   2.53475080
  0.21840000   2.06390690
  0.21840000   2.53474835
  0.21840000   2.06390753
  0.21860000   2.06201059
  0.21860000   2.53579449
  0.21860000   2.06201330
  0.21860000   2.53578715
  0.21860000   2.06201551
  0.21860000   2.53578087
  0.21860000   2.06201735
  0.21860000   2.53577545
  0.21860000   2.06201890
  0.21860000   2.53577071
  0.21860000   2.06202022
  0.21860000   2.53576653
  0.21860000   2.06202136
  0.21860000   2.53576282
  0.21860000   2.06202236
  0.21860000   2.53575951
  0.21860000   2.06202323
  0.21860000   2.53575653
  0.21860000   2.06202401
  0.21860000   2.53575384
  0.21860000   2.06202470
  0.21860000   2.53575139
  0.21860000   2.06202532
  0.21880000   2.06013691
  0.21880000   2.53678978
  0.21880000   2.06013957
  0.21880000   2.53678247
  0.21880000   2.06014174
  0.21880000   2.53677622
  0.21880000   2.06014355
  0.21880000   2.53677081
  0.21880000   2.06014507
  0.21880000   2.53676609
  0.21880000   2.06014637
  0.21880000   2.53676193
  0.21880000   2.06014750
  0.21880000   2.53675823
  0.21880000   2.06014847
  0.21880000   2.53675493
  0.21880000   2.06014933
  0.21880000   2.53675196
  0.21880000   2.06015009
  0.21880000   2.53674928
  0.21880000   2.06015077
  0.21880000   2.53674684
  0.21880000   2.06015138
  0.21900000   2.05827135
  0.21900000   2.53777763
  0.21900000   2.05827397
  0.21900000   2.53777034
  0.21900000   2.05827610
  0.21900000   2.53776411
  0.21900000   2.05827788
  0.21900000   2.53775873
  0.21900000   2.05827938
  0.21900000   2.53775402
  0.21900000   2.05828066
  0.21900000   2.53774988
  0.21900000   2.05828176
  0.21900000   2.53774619
  0.21900000   2.05828272
  0.21900000   2.53774290
  0.21900000   2.05828357
  0.21900000   2.53773995
  0.21900000   2.05828432
  0.21900000   2.53773727
  0.21900000   2.05828498
  0.21900000   2.53773484
  0.21900000   2.05828558
  0.21920000   2.05641379
  0.21920000   2.53875816
  0.21920000   2.05641636
  0.21920000   2.53875090
  0.21920000   2.05641846
  0.21920000   2.53874470
  0.21920000   2.05642020
  0.21920000   2.53873933
  0.21920000   2.05642168
  0.21920000   2.53873464
  0.21920000   2.05642294
  0.21920000   2.53873051
  0.21920000   2.05642402
  0.21920000   2.53872684
  0.21920000   2.05642497
  0.21920000   2.53872356
  0.21920000   2.05642580
  0.21920000   2.53872061
  0.21920000   2.05642653
  0.21920000   2.53871795
  0.21920000   2.05642719
  0.21920000   2.53871552
  0.21920000   2.05642778
  0.21940000   2.05456409
  0.21940000   2.53973152
  0.21940000   2.05456662
  0.21940000   2.53972429
  0.21940000   2.05456868
  0.21940000   2.53971811
  0.21940000   2.05457040
  0.21940000   2.53971276
  0.21940000   2.05457184
  0.21940000   2.53970809
  0.21940000   2.05457308
  0.21940000   2.53970397
  0.21940000   2.05457415
  0.21940000   2.53970032
  0.21940000   2.05457508
  0.21940000   2.53969705
  0.21940000   2.05457590
  0.21940000   2.53969410
  0.21940000   2.05457662
  0.21940000   2.53969145
  0.21940000   2.05457727
  0.21940000   2.53968903
  0.21940000   2.05457784
  0.21960000   2.05272212
  0.21960000   2.54069783
  0.21960000   2.05272460
  0.21960000   2.54069063
  0.21960000   2.05272663
  0.21960000   2.54068447
  0.21960000   2.05272832
  0.21960000   2.54067914
  0.21960000   2.05272975
  0.21960000   2.54067449
  0.21960000   2.05273096
  0.21960000   2.54067038
  0.21960000   2.05273201
  0.21960000   2.54066674
  0.21960000   2.05273292
  0.21960000   2.54066348
  0.21960000   2.05273373
  0.21960000   2.54066055
  0.21960000   2.05273444
  0.21960000   2.54065790
  0.21960000   2.05273508
  0.21960000   2.54065548
  0.21960000   2.05273565
  0.21980000   2.05088776
  0.21980000   2.54165722
  0.21980000   2.05089020
  0.21980000   2.54165005
  0.21980000   2.05089220
  0.21980000   2.54164392
  0.21980000   2.05089385
  0.21980000   2.54163860
  0.21980000   2.05089525
  0.21980000   2.54163396
  0.21980000   2.05089645
  0.21980000   2.54162987
  0.21980000   2.05089748
  0.21980000   2.54162624
  0.21980000   2.05089838
  0.21980000   2.54162299
  0.21980000   2.05089917
  0.21980000   2.54162007
  0.21980000   2.05089987
  0.21980000   2.54161743
  0.21980000   2.05090050
  0.21980000   2.54161502
  0.21980000   2.05090106
  0.22000000   2.04906088
  0.22000000   2.54260982
  0.22000000   2.04906328
  0.22000000   2.54260267
  0.22000000   2.04906524
  0.22000000   2.54259656
  0.22000000   2.04906688
  0.22000000   2.54259127
  0.22000000   2.04906825
  0.22000000   2.54258664
  0.22000000   2.04906943
  0.22000000   2.54258257
  0.22000000   2.04907044
  0.22000000   2.54257895
  0.22000000   2.04907133
  0.22000000   2.54257570
  0.22000000   2.04907211
  0.22000000   2.54257279
  0.22000000   2.04907280
  0.22000000   2.54257016
  0.22000000   2.04907341
  0.22000000   2.54256776
  0.22000000   2.04907396
  0.22020000   2.04724137
  0.22020000   2.54355574
  0.22020000   2.04724373
  0.22020000   2.54354862
  0.22020000   2.04724566
  0.22020000   2.54354253
  0.22020000   2.04724726
  0.22020000   2.54353726
  0.22020000   2.04724862
  0.22020000   2.54353265
  0.22020000   2.04724978
  0.22020000   2.54352858
  0.22020000   2.04725078
  0.22020000   2.54352497
  0.22020000   2.04725164
  0.22020000   2.54352174
  0.22020000   2.04725241
  0.22020000   2.54351884
  0.22020000   2.04725309
  0.22020000   2.54351621
  0.22020000   2.04725369
  0.22020000   2.54351382
  0.22020000   2.04725423
  0.22040000   2.04542911
  0.22040000   2.54449510
  0.22040000   2.04543143
  0.22040000   2.54448801
  0.22040000   2.04543333
  0.22040000   2.54448194
  0.22040000   2.04543491
  0.22040000   2.54447668
  0.22040000   2.04543624
  0.22040000   2.54447209
  0.22040000   2.04543738
  0.22040000   2.54446804
  0.22040000   2.04543836
  0.22040000   2.54446444
  0.22040000   2.04543922
  0.22040000   2.54446122
  0.22040000   2.04543997
  0.22040000   2.54445832
  0.22040000   2.04544064
  0.22040000   2.54445570
  0.22040000   2.04544123
  0.22040000   2.54445332
  0.22040000   2.04544176
  0.22060000   2.04362399
  0.22060000   2.54542802
  0.22060000   2.04362627
  0.22060000   2.54542095
  0.22060000   2.04362814
  0.22060000   2.54541490
  0.22060000   2.04362969
  0.22060000   2.54540966
  0.22060000   2.04363100
  0.22060000   2.54540508
  0.22060000   2.04363212
  0.22060000   2.54540104
  0.22060000   2.04363309
  0.22060000   2.54539745
  0.22060000   2.04363393
  0.22060000   2.54539424
  0.22060000   2.04363467
  0.22060000   2.54539136
  0.22060000   2.04363533
  0.22060000   2.54538874
  0.22060000   2.04363591
  0.22060000   2.54538637
  0.22060000   2.04363643
  0.22080000   2.04182589
  0.22080000   2.54635460
  0.22080000   2.04182815
  0.22080000   2.54634756
  0.22080000   2.04182998
  0.22080000   2.54634153
  0.22080000   2.04183151
  0.22080000   2.54633631
  0.22080000   2.04183279
  0.22080000   2.54633174
  0.22080000   2.04183389
  0.22080000   2.54632771
  0.22080000   2.04183485
  0.22080000   2.54632413
  0.22080000   2.04183568
  0.22080000   2.54632093
  0.22080000   2.04183640
  0.22080000   2.54631805
  0.22080000   2.04183705
  0.22080000   2.54631545
  0.22080000   2.04183762
  0.22080000   2.54631308
  0.22080000   2.04183814
  0.22100000   2.04003472
  0.22100000   2.54727495
  0.22100000   2.04003694
  0.22100000   2.54726793
  0.22100000   2.04003874
  0.22100000   2.54726192
  0.22100000   2.04004025
  0.22100000   2.54725672
  0.22100000   2.04004152
  0.22100000   2.54725217
  0.22100000   2.04004260
  0.22100000   2.54724815
  0.22100000   2.04004353
  0.22100000   2.54724458
  0.22100000   2.04004435
  0.22100000   2.54724139
  0.22100000   2.04004507
  0.22100000   2.54723852
  0.22100000   2.04004570
  0.22100000   2.54723592
  0.22100000   2.04004626
  0.22100000   2.54723356
  0.22100000   2.04004677
  0.22120000   2.03825037
  0.22120000   2.54818918
  0.22120000   2.03825256
  0.22120000   2.54818219
  0.22120000   2.03825433
  0.22120000   2.54817620
  0.22120000   2.03825581
  0.22120000   2.54817101
  0.22120000   2.03825706
  0.22120000   2.54816647
  0.22120000   2.03825812
  0.22120000   2.54816247
  0.22120000   2.03825904
  0.22120000   2.54815891
  0.22120000   2.03825984
  0.22120000   2.54815573
  0.22120000   2.03826055
  0.22120000   2.54815286
  0.22120000   2.03826117
  0.22120000   2.54815027
  0.22120000   2.03826173
  0.22120000   2.54814791
  0.22120000   2.03826223
  0.22140000   2.03647274
  0.22140000   2.54909738
  0.22140000   2.03647490
  0.22140000   2.54909042
  0.22140000   2.03647664
  0.22140000   2.54908445
  0.22140000   2.03647810
  0.22140000   2.54907927
  0.22140000   2.03647932
  0.22140000   2.54907475
  0.22140000   2.03648037
  0.22140000   2.54907076
  0.22140000   2.03648127
  0.22140000   2.54906721
  0.22140000   2.03648206
  0.22140000   2.54906404
  0.22140000   2.03648276
  0.22140000   2.54906118
  0.22140000   2.03648337
  0.22140000   2.54905860
  0.22140000   2.03648392
  0.22140000   2.54905625
  0.22140000   2.03648441
  0.22160000   2.03470172
  0.22160000   2.54999967
  0.22160000   2.03470386
  0.22160000   2.54999273
  0.22160000   2.03470557
  0.22160000   2.54998678
  0.22160000   2.03470700
  0.22160000   2.54998162
  0.22160000   2.03470821
  0.22160000   2.54997711
  0.22160000   2.03470924
  0.22160000   2.54997313
  0.22160000   2.03471013
  0.22160000   2.54996959
  0.22160000   2.03471091
  0.22160000   2.54996643
  0.22160000   2.03471159
  0.22160000   2.54996358
  0.22160000   2.03471219
  0.22160000   2.54996100
  0.22160000   2.03471273
  0.22160000   2.54995865
  0.22160000   2.03471321
  0.22180000   2.03293723
  0.22180000   2.55089613
  0.22180000   2.03293936
  0.22180000   2.55088921
  0.22180000   2.03294103
  0.22180000   2.55088328
  0.22180000   2.03294244
  0.22180000   2.55087814
  0.22180000   2.03294362
  0.22180000   2.55087364
  0.22180000   2.03294464
  0.22180000   2.55086967
  0.22180000   2.03294551
  0.22180000   2.55086615
  0.22180000   2.03294628
  0.22180000   2.55086299
  0.22180000   2.03294695
  0.22180000   2.55086015
  0.22180000   2.03294754
  0.22180000   2.55085758
  0.22180000   2.03294807
  0.22180000   2.55085524
  0.22180000   2.03294855
  0.22200000   2.03117918
  0.22200000   2.55178685
  0.22200000   2.03118128
  0.22200000   2.55177997
  0.22200000   2.03118292
  0.22200000   2.55177405
  0.22200000   2.03118431
  0.22200000   2.55176893
  0.22200000   2.03118547
  0.22200000   2.55176444
  0.22200000   2.03118647
  0.22200000   2.55176049
  0.22200000   2.03118733
  0.22200000   2.55175697
  0.22200000   2.03118808
  0.22200000   2.55175382
  0.22200000   2.03118874
  0.22200000   2.55175098
  0.22200000   2.03118933
  0.22200000   2.55174842
  0.22200000   2.03118985
  0.22200000   2.55174609
  0.22200000   2.03119032
  0.22220000   2.02942748
  0.22220000   2.55267195
  0.22220000   2.02942954
  0.22220000   2.55266508
  0.22220000   2.02943115
  0.22220000   2.55265918
  0.22220000   2.02943252
  0.22220000   2.55265408
  0.22220000   2.02943367
  0.22220000   2.55264961
  0.22220000   2.02943465
  0.22220000   2.55264566
  0.22220000   2.02943550
  0.22220000   2.55264215
  0.22220000   2.02943623
  0.22220000   2.55263901
  0.22220000   2.02943688
  0.22220000   2.55263618
  0.22220000   2.02943746
  0.22220000   2.55263362
  0.22220000   2.02943797
  0.22220000   2.55263130
  0.22220000   2.02943843
  0.22240000   2.02768206
  0.22240000   2.55355149
  0.22240000   2.02768405
  0.22240000   2.55354465
  0.22240000   2.02768564
  0.22240000   2.55353877
  0.22240000   2.02768699
  0.22240000   2.55353368
  0.22240000   2.02768811
  0.22240000   2.55352922
  0.22240000   2.02768908
  0.22240000   2.55352528
  0.22240000   2.02768991
  0.22240000   2.55352178
  0.22240000   2.02769064
  0.22240000   2.55351865
  0.22240000   2.02769128
  0.22240000   2.55351583
  0.22240000   2.02769185
  0.22240000   2.55351328
  0.22240000   2.02769235
  0.22240000   2.55351096
  0.22240000   2.02769280
  0.22260000   2.02594284
  0.22260000   2.55442559
  0.22260000   2.02594471
  0.22260000   2.55441875
  0.22260000   2.02594631
  0.22260000   2.55441289
  0.22260000   2.02594762
  0.22260000   2.55440782
  0.22260000   2.02594873
  0.22260000   2.55440337
  0.22260000   2.02594968
  0.22260000   2.55439945
  0.22260000   2.02595050
  0.22260000   2.55439596
  0.22260000   2.02595122
  0.22260000   2.55439283
  0.22260000   2.02595184
  0.22260000   2.55439002
  0.22260000   2.02595240
  0.22260000   2.55438747
  0.22260000   2.02595290
  0.22260000   2.55438516
  0.22260000   2.02595334
  0.22280000   2.02420977
  0.22280000   2.55529432
  0.22280000   2.02421143
  0.22280000   2.55528747
  0.22280000   2.02421306
  0.22280000   2.55528165
  0.22280000   2.02421433
  0.22280000   2.55527658
  0.22280000   2.02421543
  0.22280000   2.55527215
  0.22280000   2.02421636
  0.22280000   2.55526823
  0.22280000   2.02421717
  0.22280000   2.55526476
  0.22280000   2.02421787
  0.22280000   2.55526164
  0.22280000   2.02421849
  0.22280000   2.55525883
  0.22280000   2.02421904
  0.22280000   2.55525629
  0.22280000   2.02421953
  0.22280000   2.55525398
  0.22280000   2.02421996
  0.22300000   2.02248281
  0.22300000   2.55615778
  0.22300000   2.02248411
  0.22300000   2.55615090
  0.22300000   2.02248583
  0.22300000   2.55614511
  0.22300000   2.02248704
  0.22300000   2.55614005
  0.22300000   2.02248813
  0.22300000   2.55613564
  0.22300000   2.02248905
  0.22300000   2.55613173
  0.22300000   2.02248984
  0.22300000   2.55612826
  0.22300000   2.02249053
  0.22300000   2.55612515
  0.22300000   2.02249114
  0.22300000   2.55612235
  0.22300000   2.02249168
  0.22300000   2.55611982
  0.22300000   2.02249216
  0.22300000   2.55611751
  0.22300000   2.02249259
  0.22320000   2.02076195
  0.22320000   2.55701606
  0.22320000   2.02076264
  0.22320000   2.55700910
  0.22320000   2.02076454
  0.22320000   2.55700337
  0.22320000   2.02076566
  0.22320000   2.55699831
  0.22320000   2.02076676
  0.22320000   2.55699391
  0.22320000   2.02076765
  0.22320000   2.55699002
  0.22320000   2.02076844
  0.22320000   2.55698656
  0.22320000   2.02076912
  0.22320000   2.55698345
  0.22320000   2.02076971
  0.22320000   2.55698067
  0.22320000   2.02077024
  0.22320000   2.55697814
  0.22320000   2.02077071
  0.22320000   2.55697584
  0.22320000   2.02077114
  0.22340000   2.01904720
  0.22340000   2.55786927
  0.22340000   2.01904691
  0.22340000   2.55786216
  0.22340000   2.01904913
  0.22340000   2.55785651
  0.22340000   2.01905010
  0.22340000   2.55785144
  0.22340000   2.01905124
  0.22340000   2.55784706
  0.22340000   2.01905210
  0.22340000   2.55784317
  0.22340000   2.01905287
  0.22340000   2.55783972
  0.22340000   2.01905354
  0.22340000   2.55783663
  0.22340000   2.01905413
  0.22340000   2.55783385
  0.22340000   2.01905465
  0.22340000   2.55783132
  0.22340000   2.01905511
  0.22340000   2.55782903
  0.22340000   2.01905553
  0.22360000   2.01733860
  0.22360000   2.55871750
  0.22360000   2.01733679
  0.22360000   2.55871013
  0.22360000   2.01733956
  0.22360000   2.55870460
  0.22360000   2.01734029
  0.22360000   2.55869951
  0.22360000   2.01734149
  0.22360000   2.55869516
  0.22360000   2.01734230
  0.22360000   2.55869128
  0.22360000   2.01734308
  0.22360000   2.55868784
  0.22360000   2.01734373
  0.22360000   2.55868475
  0.22360000   2.01734431
  0.22360000   2.55868198
  0.22360000   2.01734482
  0.22360000   2.55867946
  0.22360000   2.01734528
  0.22360000   2.55867717
  0.22360000   2.01734569
  0.22380000   2.01563625
  0.22380000   2.55956088
  0.22380000   2.01563213
  0.22380000   2.55955307
  0.22380000   2.01563576
  0.22380000   2.55954775
  0.22380000   2.01563613
  0.22380000   2.55954260
  0.22380000   2.01563745
  0.22380000   2.55953829
  0.22380000   2.01563819
  0.22380000   2.55953440
  0.22380000   2.01563898
  0.22380000   2.55953098
  0.22380000   2.01563961
  0.22380000   2.55952790
  0.22380000   2.01564018
  0.22380000   2.55952513
  0.22380000   2.01564069
  0.22380000   2.55952262
  0.22380000   2.01564113
  0.22380000   2.55952034
  0.22380000   2.01564154
  0.22400000   2.01394027
  0.22400000   2.56039952
  0.22400000   2.01393275
  0.22400000   2.56039105
  0.22400000   2.01393773
  0.22400000   2.56038602
  0.22400000   2.01393752
  0.22400000   2.56038077
  0.22400000   2.01393905
  0.22400000   2.56037652
  0.22400000   2.01393969
  0.22400000   2.56037263
  0.22400000   2.01394050
  0.22400000   2.56036922
  0.22400000   2.01394110
  0.22400000   2.56036614
  0.22400000   2.01394168
  0.22400000   2.56036338
  0.22400000   2.01394217
  0.22400000   2.56036088
  0.22400000   2.01394261
  0.22400000   2.56035860
  0.22400000   2.01394300
  0.22420000   2.01225084
  0.22420000   2.56123356
  0.22420000   2.01223847
  0.22420000   2.56122410
  0.22420000   2.01224544
  0.22420000   2.56121950
  0.22420000   2.01224438
  0.22420000   2.56121410
  0.22420000   2.01224623
  0.22420000   2.56120993
  0.22420000   2.01224671
  0.22420000   2.56120602
  0.22420000   2.01224757
  0.22420000   2.56120263
  0.22420000   2.01224814
  0.22420000   2.56119956
  0.22420000   2.01224871
  0.22420000   2.56119681
  0.22420000   2.01224919
  0.22420000   2.56119431
  0.22420000   2.01224963
  0.22420000   2.56119203
  0.22420000   2.01225002
  0.22440000   2.01056817
  0.22440000   2.56206313
  0.22440000   2.01054907
  0.22440000   2.56205226
  0.22440000   2.01055890
  0.22440000   2.56204830
  0.22440000   2.01055658
  0.22440000   2.56204265
  0.22440000   2.01055895
  0.22440000   2.56203860
  0.22440000   2.01055919
  0.22440000   2.56203465
  0.22440000   2.01056013
  0.22440000   2.56203129
  0.22440000   2.01056065
  0.22440000   2.56202822
  0.22440000   2.01056123
  0.22440000   2.56202547
  0.22440000   2.01056170
  0.22440000   2.56202298
  0.22440000   2.01056213
  0.22440000   2.56202071
  0.22440000   2.01056251
  0.22460000   2.00889246
  0.22460000   2.56288839
  0.22460000   2.00886433
  0.22460000   2.56287555
  0.22460000   2.00887813
  0.22460000   2.56287249
  0.22460000   2.00887402
  0.22460000   2.56286646
  0.22460000   2.00887715
  0.22460000   2.56286260
  0.22460000   2.00887704
  0.22460000   2.56285859
  0.22460000   2.00887812
  0.22460000   2.56285527
  0.22460000   2.00887856
  0.22460000   2.56285219
  0.22460000   2.00887916
  0.22460000   2.56284946
  0.22460000   2.00887961
  0.22460000   2.56284697
  0.22460000   2.00888004
  0.22460000   2.56284471
  0.22460000   2.00888041
  0.22480000   2.00722386
  0.22480000   2.56370948
  0.22480000   2.00718404
  0.22480000   2.56369400
  0.22480000   2.00720313
  0.22480000   2.56369217
  0.22480000   2.00719659
  0.22480000   2.56368561
  0.22480000   2.00720080
  0.22480000   2.56368201
  0.22480000   2.00720018
  0.22480000   2.56367789
  0.22480000   2.00720147
  0.22480000   2.56367463
  0.22480000   2.00720181
  0.22480000   2.56367154
  0.22480000   2.00720244
  0.22480000   2.56366883
  0.22480000   2.00720285
  0.22480000   2.56366633
  0.22480000   2.00720329
  0.22480000   2.56366408
  0.22480000   2.00720365
  0.22500000   2.00556235
  0.22500000   2.56452648
  0.22500000   2.00550805
  0.22500000   2.56450766
  0.22500000   2.00553392
  0.22500000   2.56450742
  0.22500000   2.00552418
  0.22500000   2.56450014
  0.22500000   2.00552985
  0.22500000   2.56449689
  0.22500000   2.00552853
  0.22500000   2.56449263
  0.22500000   2.00553013
  0.22500000   2.56448945
  0.22500000   2.00553031
  0.22500000   2.56448633
  0.22500000   2.00553100
  0.22500000   2.56448364
  0.22500000   2.00553138
  0.22500000   2.56448115
  0.22500000   2.00553182
  0.22500000   2.56447891
  0.22500000   2.00553217
  0.22520000   2.00390759
  0.22520000   2.56533945
  0.22520000   2.00383638
  0.22520000   2.56531657
  0.22520000   2.00387041
  0.22520000   2.56531832
  0.22520000   2.00385671
  0.22520000   2.56531012
  0.22520000   2.00386425
  0.22520000   2.56530732
  0.22520000   2.00386203
  0.22520000   2.56530287
  0.22520000   2.00386403
  0.22520000   2.56529979
  0.22520000   2.00386400
  0.22520000   2.56529664
  0.22520000   2.00386478
  0.22520000   2.56529397
  0.22520000   2.00386511
  0.22520000   2.56529148
  0.22520000   2.00386556
  0.22520000   2.56528924
  0.22520000   2.00386589
  0.22540000   2.00225867
  0.22540000   2.56614825
  0.22540000   2.00216930
  0.22540000   2.56612088
  0.22540000   2.00221243
  0.22540000   2.56612490
  0.22540000   2.00219416
  0.22540000   2.56611560
  0.22540000   2.00220394
  0.22540000   2.56611337
  0.22540000   2.00220059
  0.22540000   2.56610865
  0.22540000   2.00220313
  0.22540000   2.56610573
  0.22540000   2.00220283
  0.22540000   2.56610251
  0.22540000   2.00220372
  0.22540000   2.56609988
  0.22540000   2.00220398
  0.22540000   2.56609738
  0.22540000   2.00220446
  0.22540000   2.56609516
  0.22540000   2.00220477
  0.22560000   2.00061378
  0.22560000   2.56695257
  0.22560000   2.00050757
  0.22560000   2.56692083
  0.22560000   2.00055954
  0.22560000   2.56692716
  0.22560000   2.00053664
  0.22560000   2.56691670
  0.22560000   2.00054878
  0.22560000   2.56691508
  0.22560000   2.00054420
  0.22560000   2.56691007
  0.22560000   2.00054734
  0.22560000   2.56690731
  0.22560000   2.00054672
  0.22560000   2.56690402
  0.22560000   2.00054776
  0.22560000   2.56690144
  0.22560000   2.00054794
  0.22560000   2.56689892
  0.22560000   2.00054844
  0.22560000   2.56689671
  0.22560000   2.00054873
  0.22580000   1.99896969
  0.22580000   2.56775167
  0.22580000   1.99885266
  0.22580000   2.56771686
  0.22580000   1.99891093
  0.22580000   2.56772497
  0.22580000   1.99888444
  0.22580000   2.56771355
  0.22580000   1.99889853
  0.22580000   2.56771247
  0.22580000   1.99889288
  0.22580000   2.56770719
  0.22580000   1.99889658
  0.22580000   2.56770458
  0.22580000   1.99889564
  0.22580000   2.56770123
  0.22580000   1.99889684
  0.22580000   2.56769870
  0.22580000   1.99889692
  0.22580000   2.56769616
  0.22580000   1.99889746
  0.22580000   2.56769397
  0.22580000   1.99889772
  0.22600000   1.99732122
  0.22600000   2.56854432
  0.22600000   1.99720719
  0.22600000   2.56850970
  0.22600000   1.99726517
  0.22600000   2.56851804
  0.22600000   1.99723820
  0.22600000   2.56850639
  0.22600000   1.99725279
  0.22600000   2.56850552
  0.22600000   1.99724673
  0.22600000   2.56850013
  0.22600000   1.99725068
  0.22600000   2.56849760
  0.22600000   1.99724958
  0.22600000   2.56849421
  0.22600000   1.99725086
  0.22600000   2.56849171
  0.22600000   1.99725088
  0.22600000   2.56848917
  0.22600000   1.99725144
  0.22600000   2.56848699
  0.22600000   1.99725168
  0.22620000   1.99566061
  0.22620000   2.56932851
  0.22620000   1.99557524
  0.22620000   2.56930050
  0.22620000   1.99561999
  0.22620000   2.56930585
  0.22620000   1.99559905
  0.22620000   2.56929559
  0.22620000   1.99561088
  0.22620000   2.56929412
  0.22620000   1.99560605
  0.22620000   2.56928901
  0.22620000   1.99560943
  0.22620000   2.56928638
  0.22620000   1.99560856
  0.22620000   2.56928304
  0.22620000   1.99560973
  0.22620000   2.56928053
  0.22620000   1.99560978
  0.22620000   2.56927800
  0.22620000   1.99561033
  0.22620000   2.56927583
  0.22620000   1.99561056
  0.22640000   1.99397736
  0.22640000   2.57010140
  0.22640000   1.99396266
  0.22640000   2.57009095
  0.22640000   1.99397204
  0.22640000   2.57008756
  0.22640000   1.99396876
  0.22640000   2.57008170
  0.22640000   1.99397173
  0.22640000   2.57007805
  0.22640000   1.99397131
  0.22640000   2.57007405
  0.22640000   1.99397247
  0.22640000   2.57007088
  0.22640000   1.99397269
  0.22640000   2.57006783
  0.22640000   1.99397330
  0.22640000   2.57006519
  0.22640000   1.99397363
  0.22640000   2.57006273
  0.22640000   1.99397402
  0.22640000   2.57006053
  0.22640000   1.99397432
  0.22660000   1.99225955
  0.22660000   2.57085956
  0.22660000   1.99237648
  0.22660000   2.57088315
  0.22660000   1.99231711
  0.22660000   2.57086203
  0.22660000   1.99234967
  0.22660000   2.57086546
  0.22660000   1.99233391
  0.22660000   2.57085699
  0.22660000   1.99234324
  0.22660000   2.57085552
  0.22660000   1.99233930
  0.22660000   2.57085105
  0.22660000   1.99234217
  0.22660000   2.57084869
  0.22660000   1.99234138
  0.22660000   2.57084570
  0.22660000   1.99234242
  0.22660000   2.57084344
  0.22660000   1.99234244
  0.22660000   2.57084114
  0.22660000   1.99234293
  0.22680000   1.99049880
  0.22680000   2.57160024
  0.22680000   1.99082239
  0.22680000   2.57167894
  0.22680000   1.99065145
  0.22680000   2.57162819
  0.22680000   1.99074408
  0.22680000   2.57164762
  0.22680000   1.99069593
  0.22680000   2.57163056
  0.22680000   1.99072268
  0.22680000   2.57163374
  0.22680000   1.99070934
  0.22680000   2.57162678
  0.22680000   1.99071726
  0.22680000   2.57162578
  0.22680000   1.99071374
  0.22680000   2.57162207
  0.22680000   1.99071624
  0.22680000   2.57162021
  0.22680000   1.99071546
  0.22680000   2.57161771
  0.22680000   1.99071637
  0.22700000   1.98870145
  0.22700000   2.57232447
  0.22700000   1.98929845
  0.22700000   2.57247823
  0.22700000   1.98897525
  0.22700000   2.57238590
  0.22700000   1.98915229
  0.22700000   2.57242846
  0.22700000   1.98905727
  0.22700000   2.57239862
  0.22700000   1.98910997
  0.22700000   2.57240890
  0.22700000   1.98908223
  0.22700000   2.57239803
  0.22700000   1.98909810
  0.22700000   2.57239921
  0.22700000   1.98909017
  0.22700000   2.57239431
  0.22700000   1.98909510
  0.22700000   2.57239312
  0.22700000   1.98909297
  0.22700000   2.57239026
  0.22700000   1.98909461
  0.22720000   1.98690714
  0.22720000   2.57304256
  0.22720000   1.98778386
  0.22720000   2.57327578
  0.22720000   1.98729917
  0.22720000   2.57313795
  0.22720000   1.98756879
  0.22720000   2.57320665
  0.22720000   1.98742062
  0.22720000   2.57316189
  0.22720000   1.98750369
  0.22720000   2.57318073
  0.22720000   1.98745859
  0.22720000   2.57316500
  0.22720000   1.98748435
  0.22720000   2.57316897
  0.22720000   1.98747077
  0.22720000   2.57316250
  0.22720000   1.98747890
  0.22720000   2.57316221
  0.22720000   1.98747494
  0.22720000   2.57315885
  0.22720000   1.98747761
  0.22740000   1.98521404
  0.22740000   2.57378208
  0.22740000   1.98622270
  0.22740000   2.57405624
  0.22740000   1.98565439
  0.22740000   2.57389300
  0.22740000   1.98597600
  0.22740000   2.57397745
  0.22740000   1.98579572
  0.22740000   2.57392311
  0.22740000   1.98589838
  0.22740000   2.57394780
  0.22740000   1.98584137
  0.22740000   2.57392857
  0.22740000   1.98587429
  0.22740000   2.57393466
  0.22740000   1.98585640
  0.22740000   2.57392694
  0.22740000   1.98586709
  0.22740000   2.57392741
  0.22740000   1.98586159
  0.22740000   2.57392361
  0.22740000   1.98586517
  0.22760000   1.98381230
  0.22760000   2.57459864
  0.22760000   1.98450180
  0.22760000   2.57478717
  0.22760000   1.98410706
  0.22760000   2.57467023
  0.22760000   1.98433494
  0.22760000   2.57472973
  0.22760000   1.98420523
  0.22760000   2.57468884
  0.22760000   1.98428069
  0.22760000   2.57470635
  0.22760000   1.98423824
  0.22760000   2.57469098
  0.22760000   1.98426337
  0.22760000   2.57469504
  0.22760000   1.98424962
  0.22760000   2.57468841
  0.22760000   1.98425810
  0.22760000   2.57468832
  0.22760000   1.98425376
  0.22760000   2.57468483
  0.22760000   1.98425672
  0.22780000   1.98297175
  0.22780000   2.57557284
  0.22780000   1.98245645
  0.22780000   2.57541874
  0.22780000   1.98275890
  0.22780000   2.57550009
  0.22780000   1.98258344
  0.22780000   2.57544493
  0.22780000   1.98268708
  0.22780000   2.57547043
  0.22780000   1.98262752
  0.22780000   2.57544957
  0.22780000   1.98266317
  0.22780000   2.57545644
  0.22780000   1.98264309
  0.22780000   2.57544766
  0.22780000   1.98265548
  0.22780000   2.57544848
  0.22780000   1.98264883
  0.22780000   2.57544410
  0.22780000   1.98265323
  0.22780000   2.57544311
  0.22780000   1.98265112
  0.22800000   1.98257475
  0.22800000   2.57667395
  0.22800000   1.98014790
  0.22800000   2.57596285
  0.22800000   1.98158626
  0.22800000   2.57637790
  0.22800000   1.98073064
  0.22800000   2.57612399
  0.22800000   1.98123961
  0.22800000   2.57626833
  0.22800000   1.98093784
  0.22800000   2.57617664
  0.22800000   1.98111794
  0.22800000   2.57622584
  0.22800000   1.98101161
  0.22800000   2.57619183
  0.22800000   1.98107544
  0.22800000   2.57620774
  0.22800000   1.98103807
  0.22800000   2.57619438
  0.22800000   1.98106079
  0.22800000   2.57619876
  0.22800000   1.98104775
  0.22820000   1.98074929
  0.22820000   2.57736325
  0.22820000   1.97867490
  0.22820000   2.57674471
  0.22820000   1.97992624
  0.22820000   2.57711086
  0.22820000   1.97916965
  0.22820000   2.57688232
  0.22820000   1.97962752
  0.22820000   2.57701391
  0.22820000   1.97935152
  0.22820000   2.57692851
  0.22820000   1.97951908
  0.22820000   2.57697485
  0.22820000   1.97941851
  0.22820000   2.57694209
  0.22820000   1.97947991
  0.22820000   2.57695760
  0.22820000   1.97944336
  0.22820000   2.57694433
  0.22820000   1.97946595
  0.22820000   2.57694879
  0.22820000   1.97945274
  0.22840000   1.97462238
  0.22840000   2.57673292
  0.22840000   1.97989297
  0.22840000   2.57832497
  0.22840000   1.97663126
  0.22840000   2.57734359
  0.22840000   1.97862692
  0.22840000   2.57794120
  0.22840000   1.97739809
  0.22840000   2.57756820
  0.22840000   1.97815268
  0.22840000   2.57779183
  0.22840000   1.97768931
  0.22840000   2.57764930
  0.22840000   1.97797451
  0.22840000   2.57773220
  0.22840000   1.97779982
  0.22840000   2.57767702
  0.22840000   1.97790767
  0.22840000   2.57770705
  0.22840000   1.97784189
  0.22840000   2.57768506
  0.22840000   1.97788273
  0.22860000   1.98173433
  0.22860000   2.58007720
  0.22860000   1.97298179
  0.22860000   2.57743569
  0.22860000   1.97837663
  0.22860000   2.57909109
  0.22860000   1.97498402
  0.22860000   2.57805611
  0.22860000   1.97709318
  0.22860000   2.57869839
  0.22860000   1.97577301
  0.22860000   2.57829261
  0.22860000   1.97659657
  0.22860000   2.57854130
  0.22860000   1.97608236
  0.22860000   2.57838159
  0.22860000   1.97640378
  0.22860000   2.57847721
  0.22860000   1.97620350
  0.22860000   2.57841374
  0.22860000   1.97632898
  0.22860000   2.57844991
  0.22860000   1.97625104
  0.22880000   2.57649687
  0.22880000   1.98023428
  0.22880000   2.58086108
  0.22880000   1.97129789
  0.22880000   2.57812383
  0.22880000   1.97689569
  0.22880000   2.57986757
  0.22880000   1.97331940
  0.22880000   2.57876104
  0.22880000   1.97557804
  0.22880000   2.57945975
  0.22880000   1.97414148
  0.22880000   2.57901228
  0.22880000   1.97505176
  0.22880000   2.57929185
  0.22880000   1.97447414
  0.22880000   2.57911036
  0.22880000   1.97484082
  0.22880000   2.57922164
  0.22880000   1.97460856
  0.22880000   2.57914748
  0.22880000   1.97475627
  0.22880000   2.57919123
  0.22900000   2.57995937
  0.22900000   1.97309337
  0.22900000   2.57993519
  0.22900000   1.97313224
  0.22900000   2.57994215
  0.22900000   1.97310833
  0.22900000   2.57992990
  0.22900000   1.97312477
  0.22900000   2.57993085
  0.22900000   1.97311509
  0.22900000   2.57992403
  0.22900000   1.97312213
  0.22900000   2.57992286
  0.22900000   1.97311830
  0.22900000   2.57991860
  0.22900000   1.97312140
  0.22900000   2.57991681
  0.22900000   1.97311996
  0.22900000   2.57991384
  0.22900000   1.97312139
  0.22900000   2.57991200
  0.22900000   1.97312091
  0.22900000   2.57990976
  0.22920000   2.57963988
  0.22920000   1.97367984
  0.22920000   2.58134920
  0.22920000   1.97016208
  0.22920000   2.58022643
  0.22920000   1.97245557
  0.22920000   2.58095514
  0.22920000   1.97095170
  0.22920000   2.58047198
  0.22920000   1.97193500
  0.22920000   2.58078213
  0.22920000   1.97129163
  0.22920000   2.58057363
  0.22920000   1.97171303
  0.22920000   2.58070499
  0.22920000   1.97143779
  0.22920000   2.58061444
  0.22920000   1.97161839
  0.22920000   2.58066951
  0.22920000   1.97150070
  0.22920000   2.58062967
  0.22920000   1.97157813
  0.22920000   2.58065225
  0.22940000   2.58233614
  0.22940000   1.96807431
  0.22940000   2.58078463
  0.22940000   1.97124923
  0.22940000   2.58180968
  0.22940000   1.96913381
  0.22940000   2.58112208
  0.22940000   1.97053687
  0.22940000   2.58157224
  0.22940000   1.96960430
  0.22940000   2.58126701
  0.22940000   1.97022397
  0.22940000   2.58146409
  0.22940000   1.96981278
  0.22940000   2.58132803
  0.22940000   1.97008643
  0.22940000   2.58141374
  0.22940000   1.96990517
  0.22940000   2.58135258
  0.22940000   1.97002604
  0.22940000   2.58138935
  0.22940000   1.96994619
  0.22940000   2.58136140
  0.22960000   2.58332704
  0.22960000   1.96596243
  0.22960000   2.58131862
  0.22960000   1.97008004
  0.22960000   2.58266917
  0.22960000   1.96729315
  0.22960000   2.58175303
  0.22960000   1.96916750
  0.22960000   2.58236449
  0.22960000   1.96790227
  0.22960000   2.58194623
  0.22960000   1.96875492
  0.22960000   2.58222258
  0.22960000   1.96818031
  0.22960000   2.58203113
  0.22960000   1.96856807
  0.22960000   2.58215550
  0.22960000   1.96830712
  0.22960000   2.58206740
  0.22960000   1.96848348
  0.22960000   2.58212291
  0.22960000   1.96836502
  0.22960000   2.58208194
  0.22980000   2.58321585
  0.22980000   1.96611622
  0.22980000   2.58261078
  0.22980000   1.96734917
  0.22980000   2.58301528
  0.22980000   1.96650600
  0.22980000   2.58273014
  0.22980000   1.96708346
  0.22980000   2.58291771
  0.22980000   1.96668919
  0.22980000   2.58278275
  0.22980000   1.96695962
  0.22980000   2.58286913
  0.22980000   1.96677532
  0.22980000   2.58280473
  0.22980000   1.96690199
  0.22980000   2.58284399
  0.22980000   1.96681590
  0.22980000   2.58281281
  0.22980000   1.96687527
  0.22980000   2.58283020
  0.22980000   1.96683510
  0.22980000   2.58281472
  0.23000000   2.58293016
  0.23000000   1.96662881
  0.23000000   2.58402184
  0.23000000   1.96436745
  0.23000000   2.58325595
  0.23000000   1.96593458
  0.23000000   2.58377947
  0.23000000   1.96484664
  0.23000000   2.58340893
  0.23000000   1.96560173
  0.23000000   2.58365946
  0.23000000   1.96507825
  0.23000000   2.58347971
  0.23000000   1.96544200
  0.23000000   2.58359910
  0.23000000   1.96519017
  0.23000000   2.58351146
  0.23000000   1.96536540
  0.23000000   2.58356791
  0.23000000   1.96524429
  0.23000000   2.58352479
  0.23000000   1.96532874
  0.23000000   2.58355109
  0.23020000   2.58302691
  0.23020000   1.96635348
  0.23020000   2.58517061
  0.23020000   1.96192064
  0.23020000   2.58365855
  0.23020000   1.96502834
  0.23020000   2.58471689
  0.23020000   1.96283645
  0.23020000   2.58396602
  0.23020000   1.96437666
  0.23020000   2.58448833
  0.23020000   1.96329218
  0.23020000   2.58411514
  0.23020000   1.96405522
  0.23020000   2.58437251
  0.23020000   1.96351857
  0.23020000   2.58418665
  0.23020000   1.96389652
  0.23020000   2.58431307
  0.23020000   1.96363099
  0.23020000   2.58422016
  0.23020000   1.96381820
  0.23020000   2.58428190
  0.23040000   2.58356378
  0.23040000   1.96517011
  0.23040000   2.58601779
  0.23040000   1.96009229
  0.23040000   2.58426508
  0.23040000   1.96369993
  0.23040000   2.58551071
  0.23040000   1.96111921
  0.23040000   2.58461635
  0.23040000   1.96295719
  0.23040000   2.58524860
  0.23040000   1.96164465
  0.23040000   2.58479198
  0.23040000   1.96258068
  0.23040000   2.58511256
  0.23040000   1.96191299
  0.23040000   2.58487911
  0.23040000   1.96238958
  0.23040000   2.58504129
  0.23040000   1.96204993
  0.23040000   2.58492162
  0.23040000   1.96229257
  0.23040000   2.58500334
  0.23060000   2.58449085
  0.23060000   1.96317935
  0.23060000   2.58658938
  0.23060000   1.95883071
  0.23060000   2.58506714
  0.23060000   1.96196555
  0.23060000   2.58616198
  0.23060000   1.95969374
  0.23060000   2.58536389
  0.23060000   1.96133456
  0.23060000   2.58593494
  0.23060000   1.96014716
  0.23060000   2.58551625
  0.23060000   1.96100571
  0.23060000   2.58581376
  0.23060000   1.96038503
  0.23060000   2.58559381
  0.23060000   1.96083417
  0.23060000   2.58574846
  0.23060000   1.96050974
  0.23060000   2.58563262
  0.23060000   1.96074470
  0.23060000   2.58571272
  0.23080000   2.58574256
  0.23080000   1.96051393
  0.23080000   2.58691710
  0.23080000   1.95807175
  0.23080000   2.58604739
  0.23080000   1.95985974
  0.23080000   2.58667667
  0.23080000   1.95854854
  0.23080000   2.58620800
  0.23080000   1.95950954
  0.23080000   2.58654477
  0.23080000   1.95880550
  0.23080000   2.58629189
  0.23080000   1.95932190
  0.23080000   2.58647176
  0.23080000   1.95894390
  0.23080000   2.58633502
  0.23080000   1.95922137
  0.23080000   2.58643077
  0.23080000   1.95901845
  0.23080000   2.58635654
  0.23080000   1.95916755
  0.23080000   2.58640724
  0.23100000   2.58718770
  0.23100000   1.95744277
  0.23100000   2.58708047
  0.23100000   1.95765189
  0.23100000   2.58714948
  0.23100000   1.95749791
  0.23100000   2.58708904
  0.23100000   1.95761339
  0.23100000   2.58712591
  0.23100000   1.95752858
  0.23100000   2.58709149
  0.23100000   1.95759236
  0.23100000   2.58711081
  0.23100000   1.95754569
  0.23100000   2.58709089
  0.23100000   1.95758095
  0.23100000   2.58710068
  0.23100000   1.95755530
  0.23100000   2.58708890
  0.23100000   1.95757481
  0.23100000   2.58709355
  0.23100000   1.95756073
  0.23100000   2.58708637
  0.23120000   2.58866333
  0.23120000   1.95430207
  0.23120000   2.58719181
  0.23120000   1.95733908
  0.23120000   2.58829060
  0.23120000   1.95505082
  0.23120000   2.58745612
  0.23120000   1.95677066
  0.23120000   2.58807662
  0.23120000   1.95547624
  0.23120000   2.58760320
  0.23120000   1.95644991
  0.23120000   2.58795330
  0.23120000   1.95571766
  0.23120000   2.58768448
  0.23120000   1.95626880
  0.23120000   2.58788174
  0.23120000   1.95585458
  0.23120000   2.58772887
  0.23120000   1.95616653
  0.23120000   2.58783977
  0.23120000   1.95593224
  0.23120000   2.58775262
  0.23140000   2.59005096
  0.23140000   1.95133774
  0.23140000   2.58734239
  0.23140000   1.95694437
  0.23140000   2.58940308
  0.23140000   1.95265872
  0.23140000   2.58782849
  0.23140000   1.95591571
  0.23140000   2.58902274
  0.23140000   1.95342989
  0.23140000   2.58810731
  0.23140000   1.95532149
  0.23140000   2.58879935
  0.23140000   1.95387921
  0.23140000   2.58826700
  0.23140000   1.95497758
  0.23140000   2.58866782
  0.23140000   1.95414070
  0.23140000   2.58835808
  0.23140000   1.95477837
  0.23140000   2.58859002
  0.23140000   1.95429278
  0.23140000   2.58840961
  0.23160000   2.59129957
  0.23160000   1.94865675
  0.23160000   2.58757879
  0.23160000   1.95637100
  0.23160000   2.59045216
  0.23160000   1.95039412
  0.23160000   2.58823505
  0.23160000   1.95498856
  0.23160000   2.58994238
  0.23160000   1.95143510
  0.23160000   2.58862114
  0.23160000   1.95417120
  0.23160000   2.58963590
  0.23160000   1.95205749
  0.23160000   2.58884847
  0.23160000   1.95368659
  0.23160000   2.58945150
  0.23160000   1.95242906
  0.23160000   2.58898209
  0.23160000   1.95339887
  0.23160000   2.58934028
  0.23160000   1.95265067
  0.23160000   2.58906031
  0.23180000   2.59239775
  0.23180000   1.94628407
  0.23180000   2.58791813
  0.23180000   1.95558315
  0.23180000   2.59142451
  0.23180000   1.94828528
  0.23180000   2.58868943
  0.23180000   1.95396076
  0.23180000   2.59082465
  0.23180000   1.94951474
  0.23180000   2.58915440
  0.23180000   1.95297888
  0.23180000   2.59045530
  0.23180000   1.95026851
  0.23180000   2.58943526
  0.23180000   1.95238263
  0.23180000   2.59022786
  0.23180000   1.95072991
  0.23180000   2.58960483
  0.23180000   1.95201993
  0.23180000   2.59008763
  0.23180000   1.95101203
  0.23180000   2.58970698
  0.23200000   2.59334041
  0.23200000   1.94423150
  0.23200000   2.58837190
  0.23200000   1.95455648
  0.23200000   2.59231026
  0.23200000   1.94635333
  0.23200000   2.58920293
  0.23200000   1.95280861
  0.23200000   2.59166006
  0.23200000   1.94768885
  0.23200000   2.58971614
  0.23200000   1.95172559
  0.23200000   2.59125008
  0.23200000   1.94852793
  0.23200000   2.59003390
  0.23200000   1.95105207
  0.23200000   2.59099164
  0.23200000   1.94905428
  0.23200000   2.59023071
  0.23200000   1.95063240
  0.23200000   2.59082862
  0.23200000   1.94938410
  0.23200000   2.59035244
  0.23220000   2.59411130
  0.23220000   1.94253398
  0.23220000   2.58896020
  0.23220000   1.95324867
  0.23220000   2.59309214
  0.23220000   1.94463485
  0.23220000   2.58979316
  0.23220000   1.95149517
  0.23220000   2.59243373
  0.23220000   1.94598875
  0.23220000   2.59032020
  0.23220000   1.95038241
  0.23220000   2.59200874
  0.23220000   1.94685990
  0.23220000   2.59065456
  0.23220000   1.94967372
  0.23220000   2.59173452
  0.23220000   1.94741962
  0.23220000   2.59086684
  0.23220000   1.94922148
  0.23220000   2.59155752
  0.23220000   1.94777887
  0.23220000   2.59100149
  0.23240000   2.59468100
  0.23240000   1.94125397
  0.23240000   2.58971371
  0.23240000   1.95159508
  0.23240000   2.59374320
  0.23240000   1.94318674
  0.23240000   2.59048616
  0.23240000   1.94996584
  0.23240000   2.59312336
  0.23240000   1.94446135
  0.23240000   2.59098706
  0.23240000   1.94890647
  0.23240000   2.59271396
  0.23240000   1.94530078
  0.23240000   2.59131262
  0.23240000   1.94821545
  0.23240000   2.59244362
  0.23240000   1.94585291
  0.23240000   2.59152437
  0.23240000   1.94776389
  0.23240000   2.59226506
  0.23240000   1.94621572
  0.23240000   2.59166200
  0.23260000   2.59501504
  0.23260000   1.94046451
  0.23260000   2.59066660
  0.23260000   1.94952355
  0.23260000   2.59423125
  0.23260000   1.94207695
  0.23260000   2.59131264
  0.23260000   1.94815600
  0.23260000   2.59370147
  0.23260000   1.94316454
  0.23260000   2.59174213
  0.23260000   1.94724443
  0.23260000   2.59334353
  0.23260000   1.94389724
  0.23260000   2.59202810
  0.23260000   1.94663532
  0.23260000   2.59310171
  0.23260000   1.94439033
  0.23260000   2.59221855
  0.23260000   1.94622774
  0.23260000   2.59293828
  0.23260000   1.94472189
  0.23260000   2.59234529
  0.23280000   2.59508754
  0.23280000   1.94022067
  0.23280000   2.59184379
  0.23280000   1.94698076
  0.23280000   2.59452787
  0.23280000   1.94136566
  0.23280000   2.59229981
  0.23280000   1.94600808
  0.23280000   2.59414116
  0.23280000   1.94215506
  0.23280000   2.59261065
  0.23280000   1.94534314
  0.23280000   2.59387398
  0.23280000   1.94269874
  0.23280000   2.59282259
  0.23280000   1.94488791
  0.23280000   2.59368930
  0.23280000   1.94307289
  0.23280000   2.59296703
  0.23280000   1.94457600
  0.23280000   2.59356156
  0.23280000   1.94333020
  0.23280000   2.59306533
  0.23300000   2.59489560
  0.23300000   1.94052938
  0.23300000   2.59324749
  0.23300000   1.94396046
  0.23300000   2.59461932
  0.23300000   1.94108235
  0.23300000   2.59346119
  0.23300000   1.94349277
  0.23300000   2.59442421
  0.23300000   1.94147168
  0.23300000   2.59361035
  0.23300000   1.94316485
  0.23300000   2.59428624
  0.23300000   1.94174563
  0.23300000   2.59371428
  0.23300000   1.94293483
  0.23300000   2.59418853
  0.23300000   1.94193829
  0.23300000   2.59378651
  0.23300000   1.94277346
[truncated: 202,879 more chars]
