# Supplementary material for: Bifurcations of a New Fractional-Order System with a One-Scroll Chaotic Attractor
Source: Hindawi journal article supplement (doi:10.1155/2019/8341514), 2019-01-01
Supplement: f1 [file 8341514.f1.zip › 8341514.f1/a-bifurcationdata/adataq098.dat]

  0.10000000   2.16114061
  0.10000000   2.16115708
  0.10000000   2.16116432
  0.10000000   2.16116704
  0.10000000   2.16116760
  0.10000000   2.16116717
  0.10000000   2.16116632
  0.10000000   2.16116532
  0.10000000   2.16116432
  0.10000000   2.16116336
  0.10000000   2.16116247
  0.10000000   2.16116164
  0.10000000   2.16116088
  0.10000000   2.16116018
  0.10000000   2.16115954
  0.10000000   2.16115895
  0.10000000   2.16115840
  0.10000000   2.16115789
  0.10000000   2.16115741
  0.10000000   2.16115697
  0.10000000   2.16115656
  0.10000000   2.16115617
  0.10000000   2.16115581
  0.10000000   2.16115546
  0.10020000   2.16311238
  0.10020000   2.16312549
  0.10020000   2.16313095
  0.10020000   2.16313274
  0.10020000   2.16313282
  0.10020000   2.16313215
  0.10020000   2.16313118
  0.10020000   2.16313013
  0.10020000   2.16312910
  0.10020000   2.16312813
  0.10020000   2.16312723
  0.10020000   2.16312641
  0.10020000   2.16312565
  0.10020000   2.16312496
  0.10020000   2.16312432
  0.10020000   2.16312373
  0.10020000   2.16312318
  0.10020000   2.16312267
  0.10020000   2.16312220
  0.10020000   2.16312176
  0.10020000   2.16312135
  0.10020000   2.16312096
  0.10020000   2.16312060
  0.10020000   2.16312026
  0.10040000   2.16505759
  0.10040000   2.16506788
  0.10040000   2.16507189
  0.10040000   2.16507293
  0.10040000   2.16507263
  0.10040000   2.16507176
  0.10040000   2.16507070
  0.10040000   2.16506960
  0.10040000   2.16506856
  0.10040000   2.16506758
  0.10040000   2.16506669
  0.10040000   2.16506586
  0.10040000   2.16506511
  0.10040000   2.16506442
  0.10040000   2.16506378
  0.10040000   2.16506319
  0.10040000   2.16506265
  0.10040000   2.16506215
  0.10040000   2.16506167
  0.10040000   2.16506124
  0.10040000   2.16506083
  0.10040000   2.16506044
  0.10040000   2.16506008
  0.10040000   2.16505974
  0.10060000   2.16697696
  0.10060000   2.16698492
  0.10060000   2.16698772
  0.10060000   2.16698816
  0.10060000   2.16698755
  0.10060000   2.16698653
  0.10060000   2.16698540
  0.10060000   2.16698428
  0.10060000   2.16698322
  0.10060000   2.16698224
  0.10060000   2.16698135
  0.10060000   2.16698053
  0.10060000   2.16697978
  0.10060000   2.16697909
  0.10060000   2.16697846
  0.10060000   2.16697787
  0.10060000   2.16697733
  0.10060000   2.16697683
  0.10060000   2.16697636
  0.10060000   2.16697592
  0.10060000   2.16697551
  0.10060000   2.16697513
  0.10060000   2.16697477
  0.10060000   2.16697443
  0.10080000   2.16887117
  0.10080000   2.16887720
  0.10080000   2.16887902
  0.10080000   2.16887897
  0.10080000   2.16887812
  0.10080000   2.16887699
  0.10080000   2.16887581
  0.10080000   2.16887466
  0.10080000   2.16887360
  0.10080000   2.16887262
  0.10080000   2.16887173
  0.10080000   2.16887091
  0.10080000   2.16887017
  0.10080000   2.16886948
  0.10080000   2.16886885
  0.10080000   2.16886827
  0.10080000   2.16886773
  0.10080000   2.16886723
  0.10080000   2.16886676
  0.10080000   2.16886633
  0.10080000   2.16886592
  0.10080000   2.16886554
  0.10080000   2.16886517
  0.10080000   2.16886483
  0.10100000   2.17074088
  0.10100000   2.17074530
  0.10100000   2.17074633
  0.10100000   2.17074588
  0.10100000   2.17074485
  0.10100000   2.17074363
  0.10100000   2.17074241
  0.10100000   2.17074125
  0.10100000   2.17074018
  0.10100000   2.17073921
  0.10100000   2.17073832
  0.10100000   2.17073751
  0.10100000   2.17073677
  0.10100000   2.17073609
  0.10100000   2.17073546
  0.10100000   2.17073488
  0.10100000   2.17073434
  0.10100000   2.17073384
  0.10100000   2.17073338
  0.10100000   2.17073294
  0.10100000   2.17073253
  0.10100000   2.17073215
  0.10100000   2.17073179
  0.10100000   2.17073145
  0.10120000   2.17258667
  0.10120000   2.17258978
  0.10120000   2.17259016
  0.10120000   2.17258940
  0.10120000   2.17258822
  0.10120000   2.17258694
  0.10120000   2.17258569
  0.10120000   2.17258452
  0.10120000   2.17258346
  0.10120000   2.17258248
  0.10120000   2.17258160
  0.10120000   2.17258079
  0.10120000   2.17258005
  0.10120000   2.17257938
  0.10120000   2.17257875
  0.10120000   2.17257817
  0.10120000   2.17257764
  0.10120000   2.17257714
  0.10120000   2.17257668
  0.10120000   2.17257624
  0.10120000   2.17257584
  0.10120000   2.17257545
  0.10120000   2.17257509
  0.10120000   2.17257476
  0.10140000   2.17440913
  0.10140000   2.17441115
  0.10140000   2.17441101
  0.10140000   2.17441000
  0.10140000   2.17440871
  0.10140000   2.17440738
  0.10140000   2.17440611
  0.10140000   2.17440494
  0.10140000   2.17440388
  0.10140000   2.17440291
  0.10140000   2.17440203
  0.10140000   2.17440123
  0.10140000   2.17440049
  0.10140000   2.17439982
  0.10140000   2.17439920
  0.10140000   2.17439862
  0.10140000   2.17439809
  0.10140000   2.17439759
  0.10140000   2.17439713
  0.10140000   2.17439670
  0.10140000   2.17439629
  0.10140000   2.17439591
  0.10140000   2.17439555
  0.10140000   2.17439521
  0.10160000   2.17620878
  0.10160000   2.17620992
  0.10160000   2.17620936
  0.10160000   2.17620816
  0.10160000   2.17620678
  0.10160000   2.17620541
  0.10160000   2.17620414
  0.10160000   2.17620297
  0.10160000   2.17620190
  0.10160000   2.17620094
  0.10160000   2.17620007
  0.10160000   2.17619927
  0.10160000   2.17619854
  0.10160000   2.17619787
  0.10160000   2.17619725
  0.10160000   2.17619667
  0.10160000   2.17619614
  0.10160000   2.17619565
  0.10160000   2.17619519
  0.10160000   2.17619475
  0.10160000   2.17619435
  0.10160000   2.17619397
  0.10160000   2.17619361
  0.10160000   2.17619327
  0.10180000   2.17798613
  0.10180000   2.17798656
  0.10180000   2.17798567
  0.10180000   2.17798432
  0.10180000   2.17798287
  0.10180000   2.17798148
  0.10180000   2.17798020
  0.10180000   2.17797903
  0.10180000   2.17797797
  0.10180000   2.17797701
  0.10180000   2.17797614
  0.10180000   2.17797535
  0.10180000   2.17797462
  0.10180000   2.17797395
  0.10180000   2.17797334
  0.10180000   2.17797277
  0.10180000   2.17797224
  0.10180000   2.17797174
  0.10180000   2.17797128
  0.10180000   2.17797085
  0.10180000   2.17797045
  0.10180000   2.17797007
  0.10180000   2.17796971
  0.10180000   2.17796937
  0.10200000   2.17974169
  0.10200000   2.17974154
  0.10200000   2.17974038
  0.10200000   2.17973891
  0.10200000   2.17973742
  0.10200000   2.17973601
  0.10200000   2.17973473
  0.10200000   2.17973356
  0.10200000   2.17973251
  0.10200000   2.17973156
  0.10200000   2.17973069
  0.10200000   2.17972990
  0.10200000   2.17972918
  0.10200000   2.17972851
  0.10200000   2.17972790
  0.10200000   2.17972733
  0.10200000   2.17972680
  0.10200000   2.17972631
  0.10200000   2.17972585
  0.10200000   2.17972542
  0.10200000   2.17972502
  0.10200000   2.17972464
  0.10200000   2.17972428
  0.10200000   2.17972394
  0.10220000   2.18147591
  0.10220000   2.18147529
  0.10220000   2.18147392
  0.10220000   2.18147236
  0.10220000   2.18147084
  0.10220000   2.18146943
  0.10220000   2.18146814
  0.10220000   2.18146698
  0.10220000   2.18146593
  0.10220000   2.18146499
  0.10220000   2.18146412
  0.10220000   2.18146334
  0.10220000   2.18146262
  0.10220000   2.18146196
  0.10220000   2.18146134
  0.10220000   2.18146078
  0.10220000   2.18146025
  0.10220000   2.18145976
  0.10220000   2.18145930
  0.10220000   2.18145887
  0.10220000   2.18145847
  0.10220000   2.18145809
  0.10220000   2.18145773
  0.10220000   2.18145740
  0.10240000   2.18318924
  0.10240000   2.18318824
  0.10240000   2.18318671
  0.10240000   2.18318509
  0.10240000   2.18318354
  0.10240000   2.18318212
  0.10240000   2.18318084
  0.10240000   2.18317969
  0.10240000   2.18317864
  0.10240000   2.18317770
  0.10240000   2.18317685
  0.10240000   2.18317606
  0.10240000   2.18317535
  0.10240000   2.18317469
  0.10240000   2.18317408
  0.10240000   2.18317351
  0.10240000   2.18317299
  0.10240000   2.18317250
  0.10240000   2.18317204
  0.10240000   2.18317161
  0.10240000   2.18317121
  0.10240000   2.18317083
  0.10240000   2.18317047
  0.10240000   2.18317014
  0.10260000   2.18488210
  0.10260000   2.18488080
  0.10260000   2.18487915
  0.10260000   2.18487748
  0.10260000   2.18487592
  0.10260000   2.18487450
  0.10260000   2.18487322
  0.10260000   2.18487207
  0.10260000   2.18487104
  0.10260000   2.18487010
  0.10260000   2.18486925
  0.10260000   2.18486847
  0.10260000   2.18486775
  0.10260000   2.18486710
  0.10260000   2.18486649
  0.10260000   2.18486592
  0.10260000   2.18486540
  0.10260000   2.18486491
  0.10260000   2.18486446
  0.10260000   2.18486403
  0.10260000   2.18486363
  0.10260000   2.18486325
  0.10260000   2.18486289
  0.10260000   2.18486256
  0.10280000   2.18655490
  0.10280000   2.18655337
  0.10280000   2.18655162
  0.10280000   2.18654992
  0.10280000   2.18654835
  0.10280000   2.18654693
  0.10280000   2.18654566
  0.10280000   2.18654452
  0.10280000   2.18654349
  0.10280000   2.18654256
  0.10280000   2.18654171
  0.10280000   2.18654094
  0.10280000   2.18654022
  0.10280000   2.18653957
  0.10280000   2.18653896
  0.10280000   2.18653840
  0.10280000   2.18653788
  0.10280000   2.18653739
  0.10280000   2.18653694
  0.10280000   2.18653651
  0.10280000   2.18653611
  0.10280000   2.18653573
  0.10280000   2.18653538
  0.10280000   2.18653504
  0.10300000   2.18820805
  0.10300000   2.18820634
  0.10300000   2.18820452
  0.10300000   2.18820279
  0.10300000   2.18820122
  0.10300000   2.18819981
  0.10300000   2.18819854
  0.10300000   2.18819741
  0.10300000   2.18819638
  0.10300000   2.18819545
  0.10300000   2.18819461
  0.10300000   2.18819384
  0.10300000   2.18819313
  0.10300000   2.18819248
  0.10300000   2.18819187
  0.10300000   2.18819131
  0.10300000   2.18819079
  0.10300000   2.18819030
  0.10300000   2.18818985
  0.10300000   2.18818942
  0.10300000   2.18818902
  0.10300000   2.18818865
  0.10300000   2.18818829
  0.10300000   2.18818796
  0.10320000   2.18984192
  0.10320000   2.18984006
  0.10320000   2.18983819
  0.10320000   2.18983645
  0.10320000   2.18983488
  0.10320000   2.18983347
  0.10320000   2.18983222
  0.10320000   2.18983109
  0.10320000   2.18983007
  0.10320000   2.18982915
  0.10320000   2.18982831
  0.10320000   2.18982754
  0.10320000   2.18982683
  0.10320000   2.18982618
  0.10320000   2.18982558
  0.10320000   2.18982502
  0.10320000   2.18982450
  0.10320000   2.18982401
  0.10320000   2.18982356
  0.10320000   2.18982314
  0.10320000   2.18982274
  0.10320000   2.18982236
  0.10320000   2.18982200
  0.10320000   2.18982167
  0.10340000   2.19145688
  0.10340000   2.19145492
  0.10340000   2.19145301
  0.10340000   2.19145126
  0.10340000   2.19144969
  0.10340000   2.19144829
  0.10340000   2.19144704
  0.10340000   2.19144592
  0.10340000   2.19144491
  0.10340000   2.19144399
  0.10340000   2.19144315
  0.10340000   2.19144239
  0.10340000   2.19144168
  0.10340000   2.19144103
  0.10340000   2.19144043
  0.10340000   2.19143988
  0.10340000   2.19143936
  0.10340000   2.19143887
  0.10340000   2.19143842
  0.10340000   2.19143800
  0.10340000   2.19143760
  0.10340000   2.19143722
  0.10340000   2.19143686
  0.10340000   2.19143653
  0.10360000   2.19305329
  0.10360000   2.19305124
  0.10360000   2.19304931
  0.10360000   2.19304756
  0.10360000   2.19304599
  0.10360000   2.19304460
  0.10360000   2.19304336
  0.10360000   2.19304224
  0.10360000   2.19304124
  0.10360000   2.19304032
  0.10360000   2.19303949
  0.10360000   2.19303873
  0.10360000   2.19303803
  0.10360000   2.19303738
  0.10360000   2.19303678
  0.10360000   2.19303623
  0.10360000   2.19303571
  0.10360000   2.19303522
  0.10360000   2.19303477
  0.10360000   2.19303435
  0.10360000   2.19303395
  0.10360000   2.19303357
  0.10360000   2.19303322
  0.10360000   2.19303288
  0.10380000   2.19463148
  0.10380000   2.19462938
  0.10380000   2.19462743
  0.10380000   2.19462568
  0.10380000   2.19462413
  0.10380000   2.19462274
  0.10380000   2.19462151
  0.10380000   2.19462040
  0.10380000   2.19461940
  0.10380000   2.19461849
  0.10380000   2.19461766
  0.10380000   2.19461690
  0.10380000   2.19461620
  0.10380000   2.19461555
  0.10380000   2.19461496
  0.10380000   2.19461440
  0.10380000   2.19461389
  0.10380000   2.19461340
  0.10380000   2.19461295
  0.10380000   2.19461253
  0.10380000   2.19461213
  0.10380000   2.19461175
  0.10380000   2.19461140
  0.10380000   2.19461106
  0.10400000   2.19619181
  0.10400000   2.19618966
  0.10400000   2.19618770
  0.10400000   2.19618596
  0.10400000   2.19618441
  0.10400000   2.19618304
  0.10400000   2.19618181
  0.10400000   2.19618071
  0.10400000   2.19617971
  0.10400000   2.19617880
  0.10400000   2.19617798
  0.10400000   2.19617722
  0.10400000   2.19617653
  0.10400000   2.19617588
  0.10400000   2.19617529
  0.10400000   2.19617473
  0.10400000   2.19617422
  0.10400000   2.19617374
  0.10400000   2.19617328
  0.10400000   2.19617286
  0.10400000   2.19617246
  0.10400000   2.19617209
  0.10400000   2.19617173
  0.10400000   2.19617140
  0.10420000   2.19773458
  0.10420000   2.19773241
  0.10420000   2.19773045
  0.10420000   2.19772871
  0.10420000   2.19772717
  0.10420000   2.19772581
  0.10420000   2.19772459
  0.10420000   2.19772349
  0.10420000   2.19772250
  0.10420000   2.19772160
  0.10420000   2.19772077
  0.10420000   2.19772002
  0.10420000   2.19771932
  0.10420000   2.19771868
  0.10420000   2.19771809
  0.10420000   2.19771754
  0.10420000   2.19771702
  0.10420000   2.19771654
  0.10420000   2.19771609
  0.10420000   2.19771567
  0.10420000   2.19771527
  0.10420000   2.19771489
  0.10420000   2.19771454
  0.10420000   2.19771420
  0.10440000   2.19926012
  0.10440000   2.19925793
  0.10440000   2.19925597
  0.10440000   2.19925424
  0.10440000   2.19925272
  0.10440000   2.19925136
  0.10440000   2.19925014
  0.10440000   2.19924905
  0.10440000   2.19924806
  0.10440000   2.19924717
  0.10440000   2.19924635
  0.10440000   2.19924560
  0.10440000   2.19924490
  0.10440000   2.19924426
  0.10440000   2.19924367
  0.10440000   2.19924312
  0.10440000   2.19924260
  0.10440000   2.19924212
  0.10440000   2.19924167
  0.10440000   2.19924125
  0.10440000   2.19924085
  0.10440000   2.19924048
  0.10440000   2.19924012
  0.10440000   2.19923979
  0.10460000   2.20076873
  0.10460000   2.20076653
  0.10460000   2.20076458
  0.10460000   2.20076286
  0.10460000   2.20076134
  0.10460000   2.20075999
  0.10460000   2.20075879
  0.10460000   2.20075770
  0.10460000   2.20075672
  0.10460000   2.20075582
  0.10460000   2.20075501
  0.10460000   2.20075426
  0.10460000   2.20075357
  0.10460000   2.20075293
  0.10460000   2.20075234
  0.10460000   2.20075179
  0.10460000   2.20075127
  0.10460000   2.20075079
  0.10460000   2.20075034
  0.10460000   2.20074992
  0.10460000   2.20074952
  0.10460000   2.20074915
  0.10460000   2.20074880
  0.10460000   2.20074846
  0.10480000   2.20226071
  0.10480000   2.20225851
  0.10480000   2.20225657
  0.10480000   2.20225486
  0.10480000   2.20225335
  0.10480000   2.20225201
  0.10480000   2.20225081
  0.10480000   2.20224973
  0.10480000   2.20224875
  0.10480000   2.20224786
  0.10480000   2.20224704
  0.10480000   2.20224630
  0.10480000   2.20224561
  0.10480000   2.20224497
  0.10480000   2.20224438
  0.10480000   2.20224383
  0.10480000   2.20224332
  0.10480000   2.20224284
  0.10480000   2.20224239
  0.10480000   2.20224197
  0.10480000   2.20224157
  0.10480000   2.20224120
  0.10480000   2.20224084
  0.10480000   2.20224051
  0.10500000   2.20373635
  0.10500000   2.20373415
  0.10500000   2.20373222
  0.10500000   2.20373053
  0.10500000   2.20372903
  0.10500000   2.20372769
  0.10500000   2.20372650
  0.10500000   2.20372542
  0.10500000   2.20372445
  0.10500000   2.20372356
  0.10500000   2.20372275
  0.10500000   2.20372200
  0.10500000   2.20372132
  0.10500000   2.20372068
  0.10500000   2.20372009
  0.10500000   2.20371954
  0.10500000   2.20371903
  0.10500000   2.20371855
  0.10500000   2.20371810
  0.10500000   2.20371768
  0.10500000   2.20371728
  0.10500000   2.20371691
  0.10500000   2.20371656
  0.10500000   2.20371622
  0.10520000   2.20519594
  0.10520000   2.20519375
  0.10520000   2.20519183
  0.10520000   2.20519014
  0.10520000   2.20518865
  0.10520000   2.20518732
  0.10520000   2.20518613
  0.10520000   2.20518506
  0.10520000   2.20518409
  0.10520000   2.20518321
  0.10520000   2.20518240
  0.10520000   2.20518166
  0.10520000   2.20518097
  0.10520000   2.20518034
  0.10520000   2.20517975
  0.10520000   2.20517920
  0.10520000   2.20517869
  0.10520000   2.20517821
  0.10520000   2.20517776
  0.10520000   2.20517734
  0.10520000   2.20517694
  0.10520000   2.20517657
  0.10520000   2.20517622
  0.10520000   2.20517588
  0.10540000   2.20663974
  0.10540000   2.20663756
  0.10540000   2.20663565
  0.10540000   2.20663397
  0.10540000   2.20663249
  0.10540000   2.20663117
  0.10540000   2.20662999
  0.10540000   2.20662892
  0.10540000   2.20662796
  0.10540000   2.20662708
  0.10540000   2.20662627
  0.10540000   2.20662553
  0.10540000   2.20662485
  0.10540000   2.20662421
  0.10540000   2.20662363
  0.10540000   2.20662308
  0.10540000   2.20662257
  0.10540000   2.20662209
  0.10540000   2.20662164
  0.10540000   2.20662122
  0.10540000   2.20662082
  0.10540000   2.20662045
  0.10540000   2.20662010
  0.10540000   2.20661976
  0.10560000   2.20806803
  0.10560000   2.20806586
  0.10560000   2.20806396
  0.10560000   2.20806230
  0.10560000   2.20806082
  0.10560000   2.20805951
  0.10560000   2.20805834
  0.10560000   2.20805727
  0.10560000   2.20805631
  0.10560000   2.20805543
  0.10560000   2.20805463
  0.10560000   2.20805389
  0.10560000   2.20805321
  0.10560000   2.20805258
  0.10560000   2.20805199
  0.10560000   2.20805144
  0.10560000   2.20805093
  0.10560000   2.20805046
  0.10560000   2.20805001
  0.10560000   2.20804959
  0.10560000   2.20804919
  0.10560000   2.20804882
  0.10560000   2.20804846
  0.10560000   2.20804813
  0.10580000   2.20948107
  0.10580000   2.20947891
  0.10580000   2.20947702
  0.10580000   2.20947537
  0.10580000   2.20947390
  0.10580000   2.20947260
  0.10580000   2.20947143
  0.10580000   2.20947037
  0.10580000   2.20946941
  0.10580000   2.20946854
  0.10580000   2.20946773
  0.10580000   2.20946700
  0.10580000   2.20946632
  0.10580000   2.20946569
  0.10580000   2.20946510
  0.10580000   2.20946455
  0.10580000   2.20946405
  0.10580000   2.20946357
  0.10580000   2.20946312
  0.10580000   2.20946270
  0.10580000   2.20946230
  0.10580000   2.20946193
  0.10580000   2.20946158
  0.10580000   2.20946124
  0.10600000   2.21087911
  0.10600000   2.21087696
  0.10600000   2.21087509
  0.10600000   2.21087344
  0.10600000   2.21087199
  0.10600000   2.21087069
  0.10600000   2.21086953
  0.10600000   2.21086847
  0.10600000   2.21086752
  0.10600000   2.21086664
  0.10600000   2.21086584
  0.10600000   2.21086511
  0.10600000   2.21086443
  0.10600000   2.21086380
  0.10600000   2.21086321
  0.10600000   2.21086267
  0.10600000   2.21086216
  0.10600000   2.21086168
  0.10600000   2.21086124
  0.10600000   2.21086082
  0.10600000   2.21086042
  0.10600000   2.21086005
  0.10600000   2.21085969
  0.10600000   2.21085936
  0.10620000   2.21226240
  0.10620000   2.21226027
  0.10620000   2.21225841
  0.10620000   2.21225677
  0.10620000   2.21225533
  0.10620000   2.21225403
  0.10620000   2.21225287
  0.10620000   2.21225182
  0.10620000   2.21225087
  0.10620000   2.21225000
  0.10620000   2.21224920
  0.10620000   2.21224847
  0.10620000   2.21224779
  0.10620000   2.21224716
  0.10620000   2.21224658
  0.10620000   2.21224603
  0.10620000   2.21224553
  0.10620000   2.21224505
  0.10620000   2.21224460
  0.10620000   2.21224418
  0.10620000   2.21224379
  0.10620000   2.21224341
  0.10620000   2.21224306
  0.10620000   2.21224272
  0.10640000   2.21363118
  0.10640000   2.21362907
  0.10640000   2.21362722
  0.10640000   2.21362560
  0.10640000   2.21362416
  0.10640000   2.21362287
  0.10640000   2.21362172
  0.10640000   2.21362067
  0.10640000   2.21361972
  0.10640000   2.21361885
  0.10640000   2.21361806
  0.10640000   2.21361732
  0.10640000   2.21361665
  0.10640000   2.21361602
  0.10640000   2.21361544
  0.10640000   2.21361489
  0.10640000   2.21361438
  0.10640000   2.21361391
  0.10640000   2.21361346
  0.10640000   2.21361304
  0.10640000   2.21361265
  0.10640000   2.21361227
  0.10640000   2.21361192
  0.10640000   2.21361158
  0.10660000   2.21498570
  0.10660000   2.21498360
  0.10660000   2.21498177
  0.10660000   2.21498015
  0.10660000   2.21497872
  0.10660000   2.21497744
  0.10660000   2.21497629
  0.10660000   2.21497525
  0.10660000   2.21497430
  0.10660000   2.21497344
  0.10660000   2.21497264
  0.10660000   2.21497191
  0.10660000   2.21497123
  0.10660000   2.21497061
  0.10660000   2.21497003
  0.10660000   2.21496948
  0.10660000   2.21496897
  0.10660000   2.21496850
  0.10660000   2.21496805
  0.10660000   2.21496763
  0.10660000   2.21496724
  0.10660000   2.21496686
  0.10660000   2.21496651
  0.10660000   2.21496617
  0.10680000   2.21632619
  0.10680000   2.21632410
  0.10680000   2.21632228
  0.10680000   2.21632067
  0.10680000   2.21631925
  0.10680000   2.21631797
  0.10680000   2.21631683
  0.10680000   2.21631579
  0.10680000   2.21631484
  0.10680000   2.21631398
  0.10680000   2.21631319
  0.10680000   2.21631246
  0.10680000   2.21631178
  0.10680000   2.21631116
  0.10680000   2.21631058
  0.10680000   2.21631003
  0.10680000   2.21630953
  0.10680000   2.21630905
  0.10680000   2.21630860
  0.10680000   2.21630818
  0.10680000   2.21630779
  0.10680000   2.21630741
  0.10680000   2.21630706
  0.10680000   2.21630673
  0.10700000   2.21765286
  0.10700000   2.21765079
  0.10700000   2.21764898
  0.10700000   2.21764738
  0.10700000   2.21764596
  0.10700000   2.21764469
  0.10700000   2.21764355
  0.10700000   2.21764252
  0.10700000   2.21764158
  0.10700000   2.21764071
  0.10700000   2.21763992
  0.10700000   2.21763920
  0.10700000   2.21763852
  0.10700000   2.21763790
  0.10700000   2.21763732
  0.10700000   2.21763677
  0.10700000   2.21763627
  0.10700000   2.21763579
  0.10700000   2.21763535
  0.10700000   2.21763493
  0.10700000   2.21763453
  0.10700000   2.21763416
  0.10700000   2.21763380
  0.10700000   2.21763347
  0.10720000   2.21896595
  0.10720000   2.21896389
  0.10720000   2.21896209
  0.10720000   2.21896050
  0.10720000   2.21895909
  0.10720000   2.21895783
  0.10720000   2.21895669
  0.10720000   2.21895566
  0.10720000   2.21895472
  0.10720000   2.21895386
  0.10720000   2.21895307
  0.10720000   2.21895234
  0.10720000   2.21895167
  0.10720000   2.21895105
  0.10720000   2.21895047
  0.10720000   2.21894992
  0.10720000   2.21894942
  0.10720000   2.21894894
  0.10720000   2.21894850
  0.10720000   2.21894808
  0.10720000   2.21894768
  0.10720000   2.21894731
  0.10720000   2.21894695
  0.10720000   2.21894662
  0.10740000   2.22026566
  0.10740000   2.22026362
  0.10740000   2.22026183
  0.10740000   2.22026025
  0.10740000   2.22025884
  0.10740000   2.22025759
  0.10740000   2.22025645
  0.10740000   2.22025542
  0.10740000   2.22025449
  0.10740000   2.22025363
  0.10740000   2.22025284
  0.10740000   2.22025212
  0.10740000   2.22025144
  0.10740000   2.22025082
  0.10740000   2.22025024
  0.10740000   2.22024970
  0.10740000   2.22024919
  0.10740000   2.22024872
  0.10740000   2.22024827
  0.10740000   2.22024785
  0.10740000   2.22024746
  0.10740000   2.22024708
  0.10740000   2.22024673
  0.10740000   2.22024639
  0.10760000   2.22155222
  0.10760000   2.22155018
  0.10760000   2.22154841
  0.10760000   2.22154683
  0.10760000   2.22154544
  0.10760000   2.22154418
  0.10760000   2.22154305
  0.10760000   2.22154203
  0.10760000   2.22154109
  0.10760000   2.22154024
  0.10760000   2.22153945
  0.10760000   2.22153873
  0.10760000   2.22153806
  0.10760000   2.22153743
  0.10760000   2.22153685
  0.10760000   2.22153631
  0.10760000   2.22153581
  0.10760000   2.22153533
  0.10760000   2.22153489
  0.10760000   2.22153447
  0.10760000   2.22153407
  0.10760000   2.22153370
  0.10760000   2.22153334
  0.10760000   2.22153301
  0.10780000   2.22282582
  0.10780000   2.22282380
  0.10780000   2.22282203
  0.10780000   2.22282047
  0.10780000   2.22281907
  0.10780000   2.22281782
  0.10780000   2.22281670
  0.10780000   2.22281568
  0.10780000   2.22281474
  0.10780000   2.22281389
  0.10780000   2.22281311
  0.10780000   2.22281238
  0.10780000   2.22281171
  0.10780000   2.22281109
  0.10780000   2.22281051
  0.10780000   2.22280997
  0.10780000   2.22280946
  0.10780000   2.22280899
  0.10780000   2.22280854
  0.10780000   2.22280812
  0.10780000   2.22280773
  0.10780000   2.22280735
  0.10780000   2.22280700
  0.10780000   2.22280666
  0.10800000   2.22408667
  0.10800000   2.22408466
  0.10800000   2.22408290
  0.10800000   2.22408134
  0.10800000   2.22407996
  0.10800000   2.22407871
  0.10800000   2.22407759
  0.10800000   2.22407657
  0.10800000   2.22407564
  0.10800000   2.22407479
  0.10800000   2.22407401
  0.10800000   2.22407328
  0.10800000   2.22407261
  0.10800000   2.22407199
  0.10800000   2.22407141
  0.10800000   2.22407087
  0.10800000   2.22407037
  0.10800000   2.22406989
  0.10800000   2.22406945
  0.10800000   2.22406903
  0.10800000   2.22406863
  0.10800000   2.22406826
  0.10800000   2.22406790
  0.10800000   2.22406757
  0.10820000   2.22533496
  0.10820000   2.22533297
  0.10820000   2.22533122
  0.10820000   2.22532967
  0.10820000   2.22532829
  0.10820000   2.22532705
  0.10820000   2.22532593
  0.10820000   2.22532491
  0.10820000   2.22532398
  0.10820000   2.22532313
  0.10820000   2.22532235
  0.10820000   2.22532163
  0.10820000   2.22532096
  0.10820000   2.22532034
  0.10820000   2.22531976
  0.10820000   2.22531922
  0.10820000   2.22531871
  0.10820000   2.22531824
  0.10820000   2.22531779
  0.10820000   2.22531737
  0.10820000   2.22531698
  0.10820000   2.22531660
  0.10820000   2.22531625
  0.10820000   2.22531591
  0.10840000   2.22657090
  0.10840000   2.22656891
  0.10840000   2.22656717
  0.10840000   2.22656563
  0.10840000   2.22656425
  0.10840000   2.22656302
  0.10840000   2.22656190
  0.10840000   2.22656089
  0.10840000   2.22655996
  0.10840000   2.22655911
  0.10840000   2.22655833
  0.10840000   2.22655761
  0.10840000   2.22655694
  0.10840000   2.22655632
  0.10840000   2.22655574
  0.10840000   2.22655520
  0.10840000   2.22655470
  0.10840000   2.22655423
  0.10840000   2.22655378
  0.10840000   2.22655336
  0.10840000   2.22655296
  0.10840000   2.22655259
  0.10840000   2.22655223
  0.10840000   2.22655190
  0.10860000   2.22779466
  0.10860000   2.22779269
  0.10860000   2.22779095
  0.10860000   2.22778942
  0.10860000   2.22778805
  0.10860000   2.22778682
  0.10860000   2.22778570
  0.10860000   2.22778469
  0.10860000   2.22778377
  0.10860000   2.22778292
  0.10860000   2.22778214
  0.10860000   2.22778142
  0.10860000   2.22778075
  0.10860000   2.22778013
  0.10860000   2.22777956
  0.10860000   2.22777902
  0.10860000   2.22777851
  0.10860000   2.22777804
  0.10860000   2.22777759
  0.10860000   2.22777717
  0.10860000   2.22777677
  0.10860000   2.22777640
  0.10860000   2.22777604
  0.10860000   2.22777571
  0.10880000   2.22900643
  0.10880000   2.22900447
  0.10880000   2.22900275
  0.10880000   2.22900122
  0.10880000   2.22899985
  0.10880000   2.22899863
  0.10880000   2.22899752
  0.10880000   2.22899651
  0.10880000   2.22899558
  0.10880000   2.22899474
  0.10880000   2.22899396
  0.10880000   2.22899324
  0.10880000   2.22899257
  0.10880000   2.22899195
  0.10880000   2.22899138
  0.10880000   2.22899084
  0.10880000   2.22899033
  0.10880000   2.22898986
  0.10880000   2.22898941
  0.10880000   2.22898899
  0.10880000   2.22898860
  0.10880000   2.22898822
  0.10880000   2.22898787
  0.10880000   2.22898753
  0.10900000   2.23020640
  0.10900000   2.23020445
  0.10900000   2.23020274
  0.10900000   2.23020121
  0.10900000   2.23019985
  0.10900000   2.23019863
  0.10900000   2.23019752
  0.10900000   2.23019651
  0.10900000   2.23019559
  0.10900000   2.23019475
  0.10900000   2.23019397
  0.10900000   2.23019325
  0.10900000   2.23019259
  0.10900000   2.23019197
  0.10900000   2.23019139
  0.10900000   2.23019085
  0.10900000   2.23019035
  0.10900000   2.23018987
  0.10900000   2.23018943
  0.10900000   2.23018901
  0.10900000   2.23018861
  0.10900000   2.23018824
  0.10900000   2.23018788
  0.10900000   2.23018754
  0.10920000   2.23139475
  0.10920000   2.23139281
  0.10920000   2.23139110
  0.10920000   2.23138958
  0.10920000   2.23138822
  0.10920000   2.23138700
  0.10920000   2.23138590
  0.10920000   2.23138489
  0.10920000   2.23138397
  0.10920000   2.23138313
  0.10920000   2.23138235
  0.10920000   2.23138164
  0.10920000   2.23138097
  0.10920000   2.23138035
  0.10920000   2.23137978
  0.10920000   2.23137924
  0.10920000   2.23137873
  0.10920000   2.23137826
  0.10920000   2.23137781
  0.10920000   2.23137739
  0.10920000   2.23137700
  0.10920000   2.23137662
  0.10920000   2.23137627
  0.10920000   2.23137593
  0.10940000   2.23257163
  0.10940000   2.23256970
  0.10940000   2.23256800
  0.10940000   2.23256649
  0.10940000   2.23256514
  0.10940000   2.23256392
  0.10940000   2.23256282
  0.10940000   2.23256182
  0.10940000   2.23256090
  0.10940000   2.23256006
  0.10940000   2.23255928
  0.10940000   2.23255856
  0.10940000   2.23255790
  0.10940000   2.23255728
  0.10940000   2.23255671
  0.10940000   2.23255617
  0.10940000   2.23255566
  0.10940000   2.23255519
  0.10940000   2.23255474
  0.10940000   2.23255432
  0.10940000   2.23255392
  0.10940000   2.23255355
  0.10940000   2.23255319
  0.10940000   2.23255286
  0.10960000   2.23373724
  0.10960000   2.23373532
  0.10960000   2.23373362
  0.10960000   2.23373212
  0.10960000   2.23373077
  0.10960000   2.23372955
  0.10960000   2.23372845
  0.10960000   2.23372745
  0.10960000   2.23372654
  0.10960000   2.23372570
  0.10960000   2.23372492
  0.10960000   2.23372421
  0.10960000   2.23372354
  0.10960000   2.23372292
  0.10960000   2.23372235
  0.10960000   2.23372181
  0.10960000   2.23372130
  0.10960000   2.23372083
  0.10960000   2.23372038
  0.10960000   2.23371996
  0.10960000   2.23371957
  0.10960000   2.23371919
  0.10960000   2.23371883
  0.10960000   2.23371850
  0.10980000   2.23489172
  0.10980000   2.23488981
  0.10980000   2.23488812
  0.10980000   2.23488662
  0.10980000   2.23488528
  0.10980000   2.23488407
  0.10980000   2.23488297
  0.10980000   2.23488197
  0.10980000   2.23488105
  0.10980000   2.23488022
  0.10980000   2.23487944
  0.10980000   2.23487873
  0.10980000   2.23487806
  0.10980000   2.23487744
  0.10980000   2.23487687
  0.10980000   2.23487633
  0.10980000   2.23487582
  0.10980000   2.23487535
  0.10980000   2.23487490
  0.10980000   2.23487448
  0.10980000   2.23487409
  0.10980000   2.23487371
  0.10980000   2.23487335
  0.10980000   2.23487302
  0.11000000   2.23603525
  0.11000000   2.23603334
  0.11000000   2.23603166
  0.11000000   2.23603017
  0.11000000   2.23602883
  0.11000000   2.23602762
  0.11000000   2.23602653
  0.11000000   2.23602553
  0.11000000   2.23602462
  0.11000000   2.23602378
  0.11000000   2.23602300
  0.11000000   2.23602229
  0.11000000   2.23602163
  0.11000000   2.23602101
  0.11000000   2.23602043
  0.11000000   2.23601989
  0.11000000   2.23601939
  0.11000000   2.23601892
  0.11000000   2.23601847
  0.11000000   2.23601805
  0.11000000   2.23601765
  0.11000000   2.23601727
  0.11000000   2.23601692
  0.11000000   2.23601658
  0.11020000   2.23716798
  0.11020000   2.23716609
  0.11020000   2.23716441
  0.11020000   2.23716292
  0.11020000   2.23716158
  0.11020000   2.23716038
  0.11020000   2.23715929
  0.11020000   2.23715829
  0.11020000   2.23715738
  0.11020000   2.23715654
  0.11020000   2.23715577
  0.11020000   2.23715506
  0.11020000   2.23715439
  0.11020000   2.23715378
  0.11020000   2.23715320
  0.11020000   2.23715266
  0.11020000   2.23715216
  0.11020000   2.23715168
  0.11020000   2.23715124
  0.11020000   2.23715081
  0.11020000   2.23715042
  0.11020000   2.23715004
  0.11020000   2.23714968
  0.11020000   2.23714935
  0.11040000   2.23829007
  0.11040000   2.23828819
  0.11040000   2.23828652
  0.11040000   2.23828503
  0.11040000   2.23828370
  0.11040000   2.23828250
  0.11040000   2.23828141
  0.11040000   2.23828041
  0.11040000   2.23827950
  0.11040000   2.23827867
  0.11040000   2.23827789
  0.11040000   2.23827718
  0.11040000   2.23827652
  0.11040000   2.23827590
  0.11040000   2.23827532
  0.11040000   2.23827479
  0.11040000   2.23827428
  0.11040000   2.23827381
  0.11040000   2.23827336
  0.11040000   2.23827294
  0.11040000   2.23827254
  0.11040000   2.23827217
  0.11040000   2.23827181
  0.11040000   2.23827147
  0.11060000   2.23940168
  0.11060000   2.23939980
  0.11060000   2.23939814
  0.11060000   2.23939665
  0.11060000   2.23939533
  0.11060000   2.23939413
  0.11060000   2.23939304
  0.11060000   2.23939205
  0.11060000   2.23939114
  0.11060000   2.23939030
  0.11060000   2.23938953
  0.11060000   2.23938882
  0.11060000   2.23938815
  0.11060000   2.23938754
  0.11060000   2.23938696
  0.11060000   2.23938642
  0.11060000   2.23938592
  0.11060000   2.23938544
  0.11060000   2.23938500
  0.11060000   2.23938458
  0.11060000   2.23938418
  0.11060000   2.23938380
  0.11060000   2.23938344
  0.11060000   2.23938311
  0.11080000   2.24050295
  0.11080000   2.24050107
  0.11080000   2.24049942
  0.11080000   2.24049794
  0.11080000   2.24049662
  0.11080000   2.24049542
  0.11080000   2.24049433
  0.11080000   2.24049334
  0.11080000   2.24049243
  0.11080000   2.24049160
  0.11080000   2.24049083
  0.11080000   2.24049012
  0.11080000   2.24048945
  0.11080000   2.24048884
  0.11080000   2.24048826
  0.11080000   2.24048772
  0.11080000   2.24048722
  0.11080000   2.24048674
  0.11080000   2.24048630
  0.11080000   2.24048588
  0.11080000   2.24048548
  0.11080000   2.24048510
  0.11080000   2.24048474
  0.11080000   2.24048440
  0.11100000   2.24159402
  0.11100000   2.24159216
  0.11100000   2.24159051
  0.11100000   2.24158904
  0.11100000   2.24158771
  0.11100000   2.24158652
  0.11100000   2.24158543
  0.11100000   2.24158445
  0.11100000   2.24158354
  0.11100000   2.24158270
  0.11100000   2.24158194
  0.11100000   2.24158122
  0.11100000   2.24158056
  0.11100000   2.24157995
  0.11100000   2.24157937
  0.11100000   2.24157883
  0.11100000   2.24157833
  0.11100000   2.24157785
  0.11100000   2.24157740
  0.11100000   2.24157698
  0.11100000   2.24157658
  0.11100000   2.24157621
  0.11100000   2.24157585
  0.11100000   2.24157551
  0.11120000   2.24267506
  0.11120000   2.24267320
  0.11120000   2.24267155
  0.11120000   2.24267008
  0.11120000   2.24266877
  0.11120000   2.24266757
  0.11120000   2.24266649
  0.11120000   2.24266550
  0.11120000   2.24266460
  0.11120000   2.24266376
  0.11120000   2.24266300
  0.11120000   2.24266228
  0.11120000   2.24266162
  0.11120000   2.24266101
  0.11120000   2.24266043
  0.11120000   2.24265989
  0.11120000   2.24265939
  0.11120000   2.24265891
  0.11120000   2.24265847
  0.11120000   2.24265804
  0.11120000   2.24265764
  0.11120000   2.24265727
  0.11120000   2.24265691
  0.11120000   2.24265657
  0.11140000   2.24374618
  0.11140000   2.24374433
  0.11140000   2.24374269
  0.11140000   2.24374123
  0.11140000   2.24373991
  0.11140000   2.24373872
  0.11140000   2.24373764
  0.11140000   2.24373666
  0.11140000   2.24373575
  0.11140000   2.24373492
  0.11140000   2.24373415
  0.11140000   2.24373344
  0.11140000   2.24373278
  0.11140000   2.24373216
  0.11140000   2.24373159
  0.11140000   2.24373105
  0.11140000   2.24373054
  0.11140000   2.24373007
  0.11140000   2.24372962
  0.11140000   2.24372920
  0.11140000   2.24372880
  0.11140000   2.24372842
  0.11140000   2.24372806
  0.11140000   2.24372772
  0.11160000   2.24480755
  0.11160000   2.24480570
  0.11160000   2.24480407
  0.11160000   2.24480261
  0.11160000   2.24480129
  0.11160000   2.24480011
  0.11160000   2.24479903
  0.11160000   2.24479804
  0.11160000   2.24479714
  0.11160000   2.24479631
  0.11160000   2.24479554
  0.11160000   2.24479483
  0.11160000   2.24479417
  0.11160000   2.24479355
  0.11160000   2.24479297
  0.11160000   2.24479244
  0.11160000   2.24479193
  0.11160000   2.24479145
  0.11160000   2.24479101
  0.11160000   2.24479058
  0.11160000   2.24479019
  0.11160000   2.24478981
  0.11160000   2.24478945
  0.11160000   2.24478911
  0.11180000   2.24585928
  0.11180000   2.24585744
  0.11180000   2.24585581
  0.11180000   2.24585435
  0.11180000   2.24585304
  0.11180000   2.24585186
  0.11180000   2.24585078
  0.11180000   2.24584979
  0.11180000   2.24584889
  0.11180000   2.24584806
  0.11180000   2.24584729
  0.11180000   2.24584658
  0.11180000   2.24584592
  0.11180000   2.24584531
  0.11180000   2.24584473
  0.11180000   2.24584419
  0.11180000   2.24584369
  0.11180000   2.24584321
  0.11180000   2.24584276
  0.11180000   2.24584234
  0.11180000   2.24584194
  0.11180000   2.24584156
  0.11180000   2.24584120
  0.11180000   2.24584086
  0.11200000   2.24690151
  0.11200000   2.24689968
  0.11200000   2.24689805
  0.11200000   2.24689660
  0.11200000   2.24689529
  0.11200000   2.24689411
  0.11200000   2.24689303
  0.11200000   2.24689205
  0.11200000   2.24689115
  0.11200000   2.24689032
  0.11200000   2.24688955
  0.11200000   2.24688884
  0.11200000   2.24688818
  0.11200000   2.24688756
  0.11200000   2.24688699
  0.11200000   2.24688645
  0.11200000   2.24688594
  0.11200000   2.24688547
  0.11200000   2.24688502
  0.11200000   2.24688460
  0.11200000   2.24688420
  0.11200000   2.24688382
  0.11200000   2.24688346
  0.11200000   2.24688312
  0.11220000   2.24793438
  0.11220000   2.24793255
  0.11220000   2.24793093
  0.11220000   2.24792948
  0.11220000   2.24792818
  0.11220000   2.24792699
  0.11220000   2.24792592
  0.11220000   2.24792494
  0.11220000   2.24792404
  0.11220000   2.24792321
  0.11220000   2.24792244
  0.11220000   2.24792173
  0.11220000   2.24792107
  0.11220000   2.24792045
  0.11220000   2.24791988
  0.11220000   2.24791934
  0.11220000   2.24791883
  0.11220000   2.24791836
  0.11220000   2.24791791
  0.11220000   2.24791749
  0.11220000   2.24791709
  0.11220000   2.24791671
  0.11220000   2.24791635
  0.11220000   2.24791601
  0.11240000   2.24895800
  0.11240000   2.24895619
  0.11240000   2.24895457
  0.11240000   2.24895312
  0.11240000   2.24895182
  0.11240000   2.24895064
  0.11240000   2.24894957
  0.11240000   2.24894859
  0.11240000   2.24894769
  0.11240000   2.24894686
  0.11240000   2.24894609
  0.11240000   2.24894538
  0.11240000   2.24894472
  0.11240000   2.24894411
  0.11240000   2.24894353
  0.11240000   2.24894299
  0.11240000   2.24894248
  0.11240000   2.24894201
  0.11240000   2.24894156
  0.11240000   2.24894114
  0.11240000   2.24894074
  0.11240000   2.24894036
  0.11240000   2.24894000
  0.11240000   2.24893966
  0.11260000   2.24997252
  0.11260000   2.24997071
  0.11260000   2.24996909
  0.11260000   2.24996765
  0.11260000   2.24996635
  0.11260000   2.24996517
  0.11260000   2.24996410
  0.11260000   2.24996312
  0.11260000   2.24996222
  0.11260000   2.24996139
  0.11260000   2.24996063
  0.11260000   2.24995992
  0.11260000   2.24995926
  0.11260000   2.24995864
  0.11260000   2.24995807
  0.11260000   2.24995753
  0.11260000   2.24995702
  0.11260000   2.24995654
  0.11260000   2.24995610
  0.11260000   2.24995567
  0.11260000   2.24995527
  0.11260000   2.24995489
  0.11260000   2.24995453
  0.11260000   2.24995419
  0.11280000   2.25097804
  0.11280000   2.25097623
  0.11280000   2.25097463
  0.11280000   2.25097319
  0.11280000   2.25097189
  0.11280000   2.25097071
  0.11280000   2.25096964
  0.11280000   2.25096866
  0.11280000   2.25096777
  0.11280000   2.25096694
  0.11280000   2.25096617
  0.11280000   2.25096546
  0.11280000   2.25096480
  0.11280000   2.25096419
  0.11280000   2.25096361
  0.11280000   2.25096307
  0.11280000   2.25096257
  0.11280000   2.25096209
  0.11280000   2.25096164
  0.11280000   2.25096122
  0.11280000   2.25096081
  0.11280000   2.25096043
  0.11280000   2.25096007
  0.11280000   2.25095973
  0.11300000   2.25197470
  0.11300000   2.25197289
  0.11300000   2.25197129
  0.11300000   2.25196985
  0.11300000   2.25196856
  0.11300000   2.25196738
  0.11300000   2.25196632
  0.11300000   2.25196534
  0.11300000   2.25196444
  0.11300000   2.25196361
  0.11300000   2.25196285
  0.11300000   2.25196214
  0.11300000   2.25196148
  0.11300000   2.25196086
  0.11300000   2.25196029
  0.11300000   2.25195975
  0.11300000   2.25195924
  0.11300000   2.25195876
  0.11300000   2.25195831
  0.11300000   2.25195789
  0.11300000   2.25195749
  0.11300000   2.25195711
  0.11300000   2.25195675
  0.11300000   2.25195640
  0.11320000   2.25296260
  0.11320000   2.25296080
  0.11320000   2.25295920
  0.11320000   2.25295777
  0.11320000   2.25295648
  0.11320000   2.25295530
  0.11320000   2.25295424
  0.11320000   2.25295326
  0.11320000   2.25295236
  0.11320000   2.25295153
  0.11320000   2.25295077
  0.11320000   2.25295006
  0.11320000   2.25294940
  0.11320000   2.25294878
  0.11320000   2.25294821
  0.11320000   2.25294767
  0.11320000   2.25294716
  0.11320000   2.25294668
  0.11320000   2.25294623
  0.11320000   2.25294581
  0.11320000   2.25294541
  0.11320000   2.25294503
  0.11320000   2.25294467
  0.11320000   2.25294432
  0.11340000   2.25394187
  0.11340000   2.25394008
  0.11340000   2.25393848
  0.11340000   2.25393705
  0.11340000   2.25393576
  0.11340000   2.25393459
  0.11340000   2.25393352
  0.11340000   2.25393255
  0.11340000   2.25393165
  0.11340000   2.25393082
  0.11340000   2.25393006
  0.11340000   2.25392935
  0.11340000   2.25392869
  0.11340000   2.25392807
  0.11340000   2.25392750
  0.11340000   2.25392696
  0.11340000   2.25392645
  0.11340000   2.25392597
  0.11340000   2.25392552
  0.11340000   2.25392510
  0.11340000   2.25392470
  0.11340000   2.25392431
  0.11340000   2.25392395
  0.11340000   2.25392361
  0.11360000   2.25491262
  0.11360000   2.25491083
  0.11360000   2.25490924
  0.11360000   2.25490781
  0.11360000   2.25490652
  0.11360000   2.25490535
  0.11360000   2.25490429
  0.11360000   2.25490331
  0.11360000   2.25490241
  0.11360000   2.25490159
  0.11360000   2.25490082
  0.11360000   2.25490011
  0.11360000   2.25489945
  0.11360000   2.25489884
  0.11360000   2.25489826
  0.11360000   2.25489772
  0.11360000   2.25489721
  0.11360000   2.25489674
  0.11360000   2.25489629
  0.11360000   2.25489586
  0.11360000   2.25489546
  0.11360000   2.25489508
  0.11360000   2.25489472
  0.11360000   2.25489437
  0.11380000   2.25587496
  0.11380000   2.25587318
  0.11380000   2.25587159
  0.11380000   2.25587016
  0.11380000   2.25586887
  0.11380000   2.25586771
  0.11380000   2.25586664
  0.11380000   2.25586567
  0.11380000   2.25586477
  0.11380000   2.25586395
  0.11380000   2.25586318
  0.11380000   2.25586247
  0.11380000   2.25586181
  0.11380000   2.25586120
  0.11380000   2.25586062
  0.11380000   2.25586008
  0.11380000   2.25585957
  0.11380000   2.25585909
  0.11380000   2.25585864
  0.11380000   2.25585822
  0.11380000   2.25585782
  0.11380000   2.25585743
  0.11380000   2.25585707
  0.11380000   2.25585673
  0.11400000   2.25682900
  0.11400000   2.25682722
  0.11400000   2.25682564
  0.11400000   2.25682421
  0.11400000   2.25682293
  0.11400000   2.25682176
  0.11400000   2.25682070
  0.11400000   2.25681972
  0.11400000   2.25681883
  0.11400000   2.25681800
  0.11400000   2.25681724
  0.11400000   2.25681653
  0.11400000   2.25681587
  0.11400000   2.25681525
  0.11400000   2.25681468
  0.11400000   2.25681414
  0.11400000   2.25681363
  0.11400000   2.25681315
  0.11400000   2.25681270
  0.11400000   2.25681227
  0.11400000   2.25681187
  0.11400000   2.25681149
  0.11400000   2.25681113
  0.11400000   2.25681078
  0.11420000   2.25777485
  0.11420000   2.25777308
  0.11420000   2.25777150
  0.11420000   2.25777007
  0.11420000   2.25776879
  0.11420000   2.25776763
  0.11420000   2.25776656
  0.11420000   2.25776559
  0.11420000   2.25776470
  0.11420000   2.25776387
  0.11420000   2.25776311
  0.11420000   2.25776240
  0.11420000   2.25776174
  0.11420000   2.25776112
  0.11420000   2.25776055
  0.11420000   2.25776000
  0.11420000   2.25775950
  0.11420000   2.25775902
  0.11420000   2.25775857
  0.11420000   2.25775814
  0.11420000   2.25775774
  0.11420000   2.25775735
  0.11420000   2.25775699
  0.11420000   2.25775665
  0.11440000   2.25871262
  0.11440000   2.25871085
  0.11440000   2.25870927
  0.11440000   2.25870785
  0.11440000   2.25870657
  0.11440000   2.25870541
  0.11440000   2.25870435
  0.11440000   2.25870337
  0.11440000   2.25870248
  0.11440000   2.25870165
  0.11440000   2.25870089
  0.11440000   2.25870018
  0.11440000   2.25869952
  0.11440000   2.25869890
  0.11440000   2.25869833
  0.11440000   2.25869779
  0.11440000   2.25869728
  0.11440000   2.25869680
  0.11440000   2.25869635
  0.11440000   2.25869592
  0.11440000   2.25869552
  0.11440000   2.25869513
  0.11440000   2.25869477
  0.11440000   2.25869443
  0.11460000   2.25964241
  0.11460000   2.25964064
  0.11460000   2.25963906
  0.11460000   2.25963765
  0.11460000   2.25963637
  0.11460000   2.25963521
  0.11460000   2.25963414
  0.11460000   2.25963317
  0.11460000   2.25963228
  0.11460000   2.25963146
  0.11460000   2.25963069
  0.11460000   2.25962998
  0.11460000   2.25962932
  0.11460000   2.25962871
  0.11460000   2.25962813
  0.11460000   2.25962759
  0.11460000   2.25962708
  0.11460000   2.25962660
  0.11460000   2.25962615
  0.11460000   2.25962572
  0.11460000   2.25962532
  0.11460000   2.25962493
  0.11460000   2.25962457
  0.11460000   2.25962422
  0.11480000   2.26056432
  0.11480000   2.26056255
  0.11480000   2.26056098
  0.11480000   2.26055957
  0.11480000   2.26055829
  0.11480000   2.26055713
  0.11480000   2.26055607
  0.11480000   2.26055510
  0.11480000   2.26055420
  0.11480000   2.26055338
  0.11480000   2.26055261
  0.11480000   2.26055191
  0.11480000   2.26055124
  0.11480000   2.26055063
  0.11480000   2.26055005
  0.11480000   2.26054951
  0.11480000   2.26054900
  0.11480000   2.26054852
  0.11480000   2.26054807
  0.11480000   2.26054764
  0.11480000   2.26054724
  0.11480000   2.26054685
  0.11480000   2.26054649
  0.11480000   2.26054614
  0.11500000   2.26147845
  0.11500000   2.26147669
  0.11500000   2.26147512
  0.11500000   2.26147371
  0.11500000   2.26147243
  0.11500000   2.26147127
  0.11500000   2.26147021
  0.11500000   2.26146924
  0.11500000   2.26146835
  0.11500000   2.26146752
  0.11500000   2.26146676
  0.11500000   2.26146605
  0.11500000   2.26146539
  0.11500000   2.26146477
  0.11500000   2.26146419
  0.11500000   2.26146365
  0.11500000   2.26146314
  0.11500000   2.26146266
  0.11500000   2.26146221
  0.11500000   2.26146178
  0.11500000   2.26146138
  0.11500000   2.26146099
  0.11500000   2.26146063
  0.11500000   2.26146028
  0.11520000   2.26238490
  0.11520000   2.26238315
  0.11520000   2.26238158
  0.11520000   2.26238017
  0.11520000   2.26237889
  0.11520000   2.26237773
  0.11520000   2.26237667
  0.11520000   2.26237570
  0.11520000   2.26237481
  0.11520000   2.26237399
  0.11520000   2.26237322
  0.11520000   2.26237251
  0.11520000   2.26237185
  0.11520000   2.26237124
  0.11520000   2.26237066
  0.11520000   2.26237012
  0.11520000   2.26236961
  0.11520000   2.26236913
  0.11520000   2.26236867
  0.11520000   2.26236825
  0.11520000   2.26236784
  0.11520000   2.26236746
  0.11520000   2.26236709
  0.11520000   2.26236675
  0.11540000   2.26328377
  0.11540000   2.26328202
  0.11540000   2.26328045
  0.11540000   2.26327904
  0.11540000   2.26327777
  0.11540000   2.26327661
  0.11540000   2.26327555
  0.11540000   2.26327459
  0.11540000   2.26327369
  0.11540000   2.26327287
  0.11540000   2.26327211
  0.11540000   2.26327140
  0.11540000   2.26327074
  0.11540000   2.26327012
  0.11540000   2.26326954
  0.11540000   2.26326900
  0.11540000   2.26326849
  0.11540000   2.26326801
  0.11540000   2.26326755
  0.11540000   2.26326713
  0.11540000   2.26326672
  0.11540000   2.26326634
  0.11540000   2.26326597
  0.11540000   2.26326562
  0.11560000   2.26417515
  0.11560000   2.26417340
  0.11560000   2.26417184
  0.11560000   2.26417044
  0.11560000   2.26416916
  0.11560000   2.26416801
  0.11560000   2.26416695
  0.11560000   2.26416598
  0.11560000   2.26416509
  0.11560000   2.26416426
  0.11560000   2.26416350
  0.11560000   2.26416279
  0.11560000   2.26416213
  0.11560000   2.26416151
  0.11560000   2.26416093
  0.11560000   2.26416039
  0.11560000   2.26415988
  0.11560000   2.26415940
  0.11560000   2.26415895
  0.11560000   2.26415852
  0.11560000   2.26415811
  0.11560000   2.26415773
  0.11560000   2.26415736
  0.11560000   2.26415701
  0.11580000   2.26505914
  0.11580000   2.26505740
  0.11580000   2.26505584
  0.11580000   2.26505443
  0.11580000   2.26505316
  0.11580000   2.26505201
  0.11580000   2.26505095
  0.11580000   2.26504998
  0.11580000   2.26504909
  0.11580000   2.26504826
  0.11580000   2.26504750
  0.11580000   2.26504679
  0.11580000   2.26504613
  0.11580000   2.26504551
  0.11580000   2.26504493
  0.11580000   2.26504439
  0.11580000   2.26504388
  0.11580000   2.26504340
  0.11580000   2.26504295
  0.11580000   2.26504252
  0.11580000   2.26504211
  0.11580000   2.26504172
  0.11580000   2.26504136
  0.11580000   2.26504101
  0.11600000   2.26593583
  0.11600000   2.26593409
  0.11600000   2.26593253
  0.11600000   2.26593113
  0.11600000   2.26592986
  0.11600000   2.26592870
  0.11600000   2.26592765
  0.11600000   2.26592668
  0.11600000   2.26592579
  0.11600000   2.26592496
  0.11600000   2.26592420
  0.11600000   2.26592349
  0.11600000   2.26592283
  0.11600000   2.26592221
  0.11600000   2.26592163
  0.11600000   2.26592109
  0.11600000   2.26592058
  0.11600000   2.26592010
  0.11600000   2.26591964
  0.11600000   2.26591921
  0.11600000   2.26591881
  0.11600000   2.26591842
  0.11600000   2.26591805
  0.11600000   2.26591770
  0.11620000   2.26680531
  0.11620000   2.26680357
  0.11620000   2.26680201
  0.11620000   2.26680061
  0.11620000   2.26679934
  0.11620000   2.26679819
  0.11620000   2.26679713
  0.11620000   2.26679616
  0.11620000   2.26679527
  0.11620000   2.26679445
  0.11620000   2.26679369
  0.11620000   2.26679298
  0.11620000   2.26679231
  0.11620000   2.26679170
  0.11620000   2.26679112
  0.11620000   2.26679057
  0.11620000   2.26679006
  0.11620000   2.26678958
  0.11620000   2.26678913
  0.11620000   2.26678870
  0.11620000   2.26678829
  0.11620000   2.26678790
  0.11620000   2.26678754
  0.11620000   2.26678719
  0.11640000   2.26766766
  0.11640000   2.26766592
  0.11640000   2.26766437
  0.11640000   2.26766297
  0.11640000   2.26766170
  0.11640000   2.26766055
  0.11640000   2.26765949
  0.11640000   2.26765853
  0.11640000   2.26765764
  0.11640000   2.26765681
  0.11640000   2.26765605
  0.11640000   2.26765534
  0.11640000   2.26765468
  0.11640000   2.26765406
  0.11640000   2.26765348
  0.11640000   2.26765294
  0.11640000   2.26765242
  0.11640000   2.26765194
  0.11640000   2.26765149
  0.11640000   2.26765106
  0.11640000   2.26765065
  0.11640000   2.26765026
  0.11640000   2.26764989
  0.11640000   2.26764955
  0.11660000   2.26852298
  0.11660000   2.26852124
  0.11660000   2.26851969
  0.11660000   2.26851829
  0.11660000   2.26851703
  0.11660000   2.26851588
  0.11660000   2.26851482
  0.11660000   2.26851385
  0.11660000   2.26851296
  0.11660000   2.26851214
  0.11660000   2.26851138
  0.11660000   2.26851067
  0.11660000   2.26851000
  0.11660000   2.26850938
  0.11660000   2.26850880
  0.11660000   2.26850826
  0.11660000   2.26850775
  0.11660000   2.26850727
  0.11660000   2.26850681
  0.11660000   2.26850638
  0.11660000   2.26850597
  0.11660000   2.26850559
  0.11660000   2.26850522
  0.11660000   2.26850487
  0.11680000   2.26937134
  0.11680000   2.26936961
  0.11680000   2.26936806
  0.11680000   2.26936667
  0.11680000   2.26936540
  0.11680000   2.26936425
  0.11680000   2.26936320
  0.11680000   2.26936223
  0.11680000   2.26936134
  0.11680000   2.26936052
  0.11680000   2.26935975
  0.11680000   2.26935904
  0.11680000   2.26935838
  0.11680000   2.26935776
  0.11680000   2.26935718
  0.11680000   2.26935664
  0.11680000   2.26935612
  0.11680000   2.26935564
  0.11680000   2.26935519
  0.11680000   2.26935475
  0.11680000   2.26935435
  0.11680000   2.26935396
  0.11680000   2.26935359
  0.11680000   2.26935324
  0.11700000   2.27021285
  0.11700000   2.27021112
  0.11700000   2.27020957
  0.11700000   2.27020818
  0.11700000   2.27020691
  0.11700000   2.27020576
  0.11700000   2.27020471
  0.11700000   2.27020374
  0.11700000   2.27020285
  0.11700000   2.27020203
  0.11700000   2.27020126
  0.11700000   2.27020055
  0.11700000   2.27019989
  0.11700000   2.27019927
  0.11700000   2.27019869
  0.11700000   2.27019815
  0.11700000   2.27019763
  0.11700000   2.27019715
  0.11700000   2.27019669
  0.11700000   2.27019626
  0.11700000   2.27019585
  0.11700000   2.27019547
  0.11700000   2.27019510
  0.11700000   2.27019475
  0.11720000   2.27104757
  0.11720000   2.27104584
  0.11720000   2.27104430
  0.11720000   2.27104290
  0.11720000   2.27104164
  0.11720000   2.27104049
  0.11720000   2.27103944
  0.11720000   2.27103847
  0.11720000   2.27103758
  0.11720000   2.27103676
  0.11720000   2.27103599
  0.11720000   2.27103528
  0.11720000   2.27103462
  0.11720000   2.27103400
  0.11720000   2.27103342
  0.11720000   2.27103287
  0.11720000   2.27103236
  0.11720000   2.27103187
  0.11720000   2.27103142
  0.11720000   2.27103099
  0.11720000   2.27103058
  0.11720000   2.27103019
  0.11720000   2.27102982
  0.11720000   2.27102947
  0.11740000   2.27187558
  0.11740000   2.27187386
  0.11740000   2.27187232
  0.11740000   2.27187093
  0.11740000   2.27186966
  0.11740000   2.27186851
  0.11740000   2.27186746
  0.11740000   2.27186650
  0.11740000   2.27186560
  0.11740000   2.27186478
  0.11740000   2.27186402
  0.11740000   2.27186331
  0.11740000   2.27186264
  0.11740000   2.27186202
  0.11740000   2.27186144
  0.11740000   2.27186090
  0.11740000   2.27186038
  0.11740000   2.27185990
  0.11740000   2.27185944
  0.11740000   2.27185901
  0.11740000   2.27185860
  0.11740000   2.27185821
  0.11740000   2.27185784
  0.11740000   2.27185749
  0.11760000   2.27269698
  0.11760000   2.27269526
  0.11760000   2.27269372
  0.11760000   2.27269233
  0.11760000   2.27269107
  0.11760000   2.27268992
  0.11760000   2.27268887
  0.11760000   2.27268790
  0.11760000   2.27268701
  0.11760000   2.27268619
  0.11760000   2.27268542
  0.11760000   2.27268471
  0.11760000   2.27268405
  0.11760000   2.27268343
  0.11760000   2.27268284
  0.11760000   2.27268230
  0.11760000   2.27268179
  0.11760000   2.27268130
  0.11760000   2.27268084
  0.11760000   2.27268041
  0.11760000   2.27268000
  0.11760000   2.27267961
  0.11760000   2.27267924
  0.11760000   2.27267889
  0.11780000   2.27351183
  0.11780000   2.27351012
  0.11780000   2.27350858
  0.11780000   2.27350719
  0.11780000   2.27350593
  0.11780000   2.27350478
  0.11780000   2.27350373
  0.11780000   2.27350276
  0.11780000   2.27350187
  0.11780000   2.27350105
  0.11780000   2.27350028
  0.11780000   2.27349957
  0.11780000   2.27349891
  0.11780000   2.27349829
  0.11780000   2.27349770
  0.11780000   2.27349716
  0.11780000   2.27349664
  0.11780000   2.27349616
  0.11780000   2.27349570
  0.11780000   2.27349527
  0.11780000   2.27349486
  0.11780000   2.27349447
  0.11780000   2.27349410
  0.11780000   2.27349375
  0.11800000   2.27432022
  0.11800000   2.27431851
  0.11800000   2.27431697
  0.11800000   2.27431558
  0.11800000   2.27431432
  0.11800000   2.27431317
  0.11800000   2.27431212
  0.11800000   2.27431116
  0.11800000   2.27431027
  0.11800000   2.27430944
  0.11800000   2.27430868
  0.11800000   2.27430797
  0.11800000   2.27430730
  0.11800000   2.27430668
  0.11800000   2.27430610
  0.11800000   2.27430555
  0.11800000   2.27430504
  0.11800000   2.27430455
  0.11800000   2.27430409
  0.11800000   2.27430366
  0.11800000   2.27430325
  0.11800000   2.27430286
  0.11800000   2.27430249
  0.11800000   2.27430214
  0.11820000   2.27512222
  0.11820000   2.27512051
  0.11820000   2.27511897
  0.11820000   2.27511759
  0.11820000   2.27511633
  0.11820000   2.27511518
  0.11820000   2.27511413
  0.11820000   2.27511316
  0.11820000   2.27511227
  0.11820000   2.27511145
  0.11820000   2.27511068
  0.11820000   2.27510997
  0.11820000   2.27510931
  0.11820000   2.27510869
  0.11820000   2.27510810
  0.11820000   2.27510756
  0.11820000   2.27510704
  0.11820000   2.27510656
  0.11820000   2.27510610
  0.11820000   2.27510566
  0.11820000   2.27510525
  0.11820000   2.27510486
  0.11820000   2.27510449
  0.11820000   2.27510414
  0.11840000   2.27591791
  0.11840000   2.27591620
  0.11840000   2.27591466
  0.11840000   2.27591328
  0.11840000   2.27591202
  0.11840000   2.27591087
  0.11840000   2.27590982
  0.11840000   2.27590885
  0.11840000   2.27590796
  0.11840000   2.27590714
  0.11840000   2.27590637
  0.11840000   2.27590566
  0.11840000   2.27590500
  0.11840000   2.27590438
  0.11840000   2.27590379
  0.11840000   2.27590325
  0.11840000   2.27590273
  0.11840000   2.27590224
  0.11840000   2.27590179
  0.11840000   2.27590135
  0.11840000   2.27590094
  0.11840000   2.27590055
  0.11840000   2.27590018
  0.11840000   2.27589982
  0.11860000   2.27670735
  0.11860000   2.27670564
  0.11860000   2.27670411
  0.11860000   2.27670272
  0.11860000   2.27670147
  0.11860000   2.27670032
  0.11860000   2.27669927
  0.11860000   2.27669831
  0.11860000   2.27669742
  0.11860000   2.27669659
  0.11860000   2.27669583
  0.11860000   2.27669511
  0.11860000   2.27669445
  0.11860000   2.27669383
  0.11860000   2.27669324
  0.11860000   2.27669270
  0.11860000   2.27669218
  0.11860000   2.27669169
  0.11860000   2.27669123
  0.11860000   2.27669080
  0.11860000   2.27669039
  0.11860000   2.27669000
  0.11860000   2.27668962
  0.11860000   2.27668927
  0.11880000   2.27749063
  0.11880000   2.27748892
  0.11880000   2.27748739
  0.11880000   2.27748601
  0.11880000   2.27748475
  0.11880000   2.27748360
  0.11880000   2.27748255
  0.11880000   2.27748159
  0.11880000   2.27748070
  0.11880000   2.27747987
  0.11880000   2.27747911
  0.11880000   2.27747840
  0.11880000   2.27747773
  0.11880000   2.27747711
  0.11880000   2.27747652
  0.11880000   2.27747598
  0.11880000   2.27747546
  0.11880000   2.27747497
  0.11880000   2.27747451
  0.11880000   2.27747408
  0.11880000   2.27747366
  0.11880000   2.27747327
  0.11880000   2.27747290
  0.11880000   2.27747255
  0.11900000   2.27826781
  0.11900000   2.27826611
  0.11900000   2.27826457
  0.11900000   2.27826319
  0.11900000   2.27826194
  0.11900000   2.27826079
  0.11900000   2.27825974
  0.11900000   2.27825878
  0.11900000   2.27825788
  0.11900000   2.27825706
  0.11900000   2.27825629
  0.11900000   2.27825558
  0.11900000   2.27825491
  0.11900000   2.27825429
  0.11900000   2.27825371
  0.11900000   2.27825316
  0.11900000   2.27825264
  0.11900000   2.27825216
  0.11900000   2.27825170
  0.11900000   2.27825126
  0.11900000   2.27825085
  0.11900000   2.27825045
  0.11900000   2.27825008
  0.11900000   2.27824973
  0.11920000   2.27903896
  0.11920000   2.27903726
  0.11920000   2.27903573
  0.11920000   2.27903435
  0.11920000   2.27903309
  0.11920000   2.27903195
  0.11920000   2.27903090
  0.11920000   2.27902993
  0.11920000   2.27902904
  0.11920000   2.27902822
  0.11920000   2.27902745
  0.11920000   2.27902674
  0.11920000   2.27902607
  0.11920000   2.27902545
  0.11920000   2.27902487
  0.11920000   2.27902432
  0.11920000   2.27902380
  0.11920000   2.27902331
  0.11920000   2.27902285
  0.11920000   2.27902241
  0.11920000   2.27902200
  0.11920000   2.27902161
  0.11920000   2.27902124
  0.11920000   2.27902088
  0.11940000   2.27980416
  0.11940000   2.27980246
  0.11940000   2.27980093
  0.11940000   2.27979955
  0.11940000   2.27979829
  0.11940000   2.27979715
  0.11940000   2.27979610
  0.11940000   2.27979514
  0.11940000   2.27979424
  0.11940000   2.27979342
  0.11940000   2.27979265
  0.11940000   2.27979194
  0.11940000   2.27979127
  0.11940000   2.27979065
  0.11940000   2.27979007
  0.11940000   2.27978951
  0.11940000   2.27978900
  0.11940000   2.27978851
  0.11940000   2.27978805
  0.11940000   2.27978761
  0.11940000   2.27978720
  0.11940000   2.27978680
  0.11940000   2.27978643
  0.11940000   2.27978608
  0.11960000   2.28056347
  0.11960000   2.28056177
  0.11960000   2.28056024
  0.11960000   2.28055886
  0.11960000   2.28055761
  0.11960000   2.28055646
  0.11960000   2.28055541
  0.11960000   2.28055445
  0.11960000   2.28055356
  0.11960000   2.28055273
  0.11960000   2.28055196
  0.11960000   2.28055125
  0.11960000   2.28055058
  0.11960000   2.28054996
  0.11960000   2.28054937
  0.11960000   2.28054882
  0.11960000   2.28054831
  0.11960000   2.28054782
  0.11960000   2.28054736
  0.11960000   2.28054692
  0.11960000   2.28054651
  0.11960000   2.28054611
  0.11960000   2.28054574
  0.11960000   2.28054538
  0.11980000   2.28131695
  0.11980000   2.28131525
  0.11980000   2.28131373
  0.11980000   2.28131235
  0.11980000   2.28131110
  0.11980000   2.28130995
  0.11980000   2.28130890
  0.11980000   2.28130794
  0.11980000   2.28130704
  0.11980000   2.28130622
  0.11980000   2.28130545
  0.11980000   2.28130474
  0.11980000   2.28130407
  0.11980000   2.28130345
  0.11980000   2.28130286
  0.11980000   2.28130231
  0.11980000   2.28130179
  0.11980000   2.28130130
  0.11980000   2.28130084
  0.11980000   2.28130040
  0.11980000   2.28129999
  0.11980000   2.28129959
  0.11980000   2.28129922
  0.11980000   2.28129886
  0.12000000   2.28206468
  0.12000000   2.28206298
  0.12000000   2.28206146
  0.12000000   2.28206008
  0.12000000   2.28205883
  0.12000000   2.28205768
  0.12000000   2.28205663
  0.12000000   2.28205567
  0.12000000   2.28205478
  0.12000000   2.28205395
  0.12000000   2.28205318
  0.12000000   2.28205247
  0.12000000   2.28205180
  0.12000000   2.28205118
  0.12000000   2.28205059
  0.12000000   2.28205004
  0.12000000   2.28204952
  0.12000000   2.28204903
  0.12000000   2.28204857
  0.12000000   2.28204813
  0.12000000   2.28204772
  0.12000000   2.28204732
  0.12000000   2.28204695
  0.12000000   2.28204659
  0.12020000   2.28280671
  0.12020000   2.28280502
  0.12020000   2.28280350
  0.12020000   2.28280212
  0.12020000   2.28280087
  0.12020000   2.28279972
  0.12020000   2.28279867
  0.12020000   2.28279771
  0.12020000   2.28279682
  0.12020000   2.28279599
  0.12020000   2.28279522
  0.12020000   2.28279451
  0.12020000   2.28279384
  0.12020000   2.28279321
  0.12020000   2.28279263
  0.12020000   2.28279208
  0.12020000   2.28279156
  0.12020000   2.28279107
  0.12020000   2.28279060
  0.12020000   2.28279017
  0.12020000   2.28278975
  0.12020000   2.28278935
  0.12020000   2.28278898
  0.12020000   2.28278862
  0.12040000   2.28354312
  0.12040000   2.28354143
  0.12040000   2.28353991
  0.12040000   2.28353853
  0.12040000   2.28353728
  0.12040000   2.28353613
  0.12040000   2.28353508
  0.12040000   2.28353412
  0.12040000   2.28353323
  0.12040000   2.28353240
  0.12040000   2.28353163
  0.12040000   2.28353092
  0.12040000   2.28353025
  0.12040000   2.28352962
  0.12040000   2.28352904
  0.12040000   2.28352848
  0.12040000   2.28352797
  0.12040000   2.28352747
  0.12040000   2.28352701
  0.12040000   2.28352657
  0.12040000   2.28352616
  0.12040000   2.28352576
  0.12040000   2.28352539
  0.12040000   2.28352503
  0.12060000   2.28427396
  0.12060000   2.28427227
  0.12060000   2.28427075
  0.12060000   2.28426937
  0.12060000   2.28426812
  0.12060000   2.28426698
  0.12060000   2.28426593
  0.12060000   2.28426496
  0.12060000   2.28426407
  0.12060000   2.28426324
  0.12060000   2.28426248
  0.12060000   2.28426176
  0.12060000   2.28426109
  0.12060000   2.28426047
  0.12060000   2.28425988
  0.12060000   2.28425933
  0.12060000   2.28425881
  0.12060000   2.28425832
  0.12060000   2.28425785
  0.12060000   2.28425741
  0.12060000   2.28425700
  0.12060000   2.28425660
  0.12060000   2.28425622
  0.12060000   2.28425587
  0.12080000   2.28499930
  0.12080000   2.28499761
  0.12080000   2.28499609
  0.12080000   2.28499471
  0.12080000   2.28499346
  0.12080000   2.28499232
  0.12080000   2.28499127
  0.12080000   2.28499030
  0.12080000   2.28498941
  0.12080000   2.28498859
  0.12080000   2.28498782
  0.12080000   2.28498710
  0.12080000   2.28498643
  0.12080000   2.28498580
  0.12080000   2.28498522
  0.12080000   2.28498466
  0.12080000   2.28498414
  0.12080000   2.28498365
  0.12080000   2.28498319
  0.12080000   2.28498275
  0.12080000   2.28498233
  0.12080000   2.28498194
  0.12080000   2.28498156
  0.12080000   2.28498120
  0.12100000   2.28571919
  0.12100000   2.28571751
  0.12100000   2.28571599
  0.12100000   2.28571461
  0.12100000   2.28571336
  0.12100000   2.28571222
  0.12100000   2.28571117
  0.12100000   2.28571020
  0.12100000   2.28570931
  0.12100000   2.28570848
  0.12100000   2.28570771
  0.12100000   2.28570700
  0.12100000   2.28570633
  0.12100000   2.28570570
  0.12100000   2.28570511
  0.12100000   2.28570456
  0.12100000   2.28570404
  0.12100000   2.28570355
  0.12100000   2.28570308
  0.12100000   2.28570264
  0.12100000   2.28570222
  0.12100000   2.28570183
  0.12100000   2.28570145
  0.12100000   2.28570109
  0.12120000   2.28643371
  0.12120000   2.28643202
  0.12120000   2.28643050
  0.12120000   2.28642913
  0.12120000   2.28642788
  0.12120000   2.28642673
  0.12120000   2.28642568
  0.12120000   2.28642472
  0.12120000   2.28642383
  0.12120000   2.28642300
  0.12120000   2.28642223
  0.12120000   2.28642151
  0.12120000   2.28642084
  0.12120000   2.28642021
  0.12120000   2.28641963
  0.12120000   2.28641907
  0.12120000   2.28641855
  0.12120000   2.28641806
  0.12120000   2.28641759
  0.12120000   2.28641715
  0.12120000   2.28641673
  0.12120000   2.28641634
  0.12120000   2.28641596
  0.12120000   2.28641560
  0.12140000   2.28714289
  0.12140000   2.28714121
  0.12140000   2.28713969
  0.12140000   2.28713832
  0.12140000   2.28713707
  0.12140000   2.28713592
  0.12140000   2.28713487
  0.12140000   2.28713391
  0.12140000   2.28713301
  0.12140000   2.28713219
  0.12140000   2.28713142
  0.12140000   2.28713070
  0.12140000   2.28713003
  0.12140000   2.28712940
  0.12140000   2.28712881
  0.12140000   2.28712826
  0.12140000   2.28712774
  0.12140000   2.28712724
  0.12140000   2.28712678
  0.12140000   2.28712634
  0.12140000   2.28712592
  0.12140000   2.28712552
  0.12140000   2.28712514
  0.12140000   2.28712478
  0.12160000   2.28784682
  0.12160000   2.28784513
  0.12160000   2.28784361
  0.12160000   2.28784224
  0.12160000   2.28784099
  0.12160000   2.28783985
  0.12160000   2.28783880
  0.12160000   2.28783783
  0.12160000   2.28783694
  0.12160000   2.28783611
  0.12160000   2.28783534
  0.12160000   2.28783462
  0.12160000   2.28783395
  0.12160000   2.28783332
  0.12160000   2.28783274
  0.12160000   2.28783218
  0.12160000   2.28783166
  0.12160000   2.28783116
  0.12160000   2.28783070
  0.12160000   2.28783026
  0.12160000   2.28782984
  0.12160000   2.28782944
  0.12160000   2.28782906
  0.12160000   2.28782870
  0.12180000   2.28854553
  0.12180000   2.28854385
  0.12180000   2.28854233
  0.12180000   2.28854096
  0.12180000   2.28853971
  0.12180000   2.28853856
  0.12180000   2.28853751
  0.12180000   2.28853655
  0.12180000   2.28853566
  0.12180000   2.28853483
  0.12180000   2.28853406
  0.12180000   2.28853334
  0.12180000   2.28853267
  0.12180000   2.28853204
  0.12180000   2.28853145
  0.12180000   2.28853089
  0.12180000   2.28853037
  0.12180000   2.28852988
  0.12180000   2.28852941
  0.12180000   2.28852897
  0.12180000   2.28852855
  0.12180000   2.28852815
  0.12180000   2.28852777
  0.12180000   2.28852741
  0.12200000   2.28923909
  0.12200000   2.28923741
  0.12200000   2.28923589
  0.12200000   2.28923452
  0.12200000   2.28923327
  0.12200000   2.28923213
  0.12200000   2.28923108
  0.12200000   2.28923011
  0.12200000   2.28922922
  0.12200000   2.28922839
  0.12200000   2.28922762
  0.12200000   2.28922690
  0.12200000   2.28922623
  0.12200000   2.28922560
  0.12200000   2.28922501
  0.12200000   2.28922445
  0.12200000   2.28922393
  0.12200000   2.28922344
  0.12200000   2.28922297
  0.12200000   2.28922253
  0.12200000   2.28922211
  0.12200000   2.28922171
  0.12200000   2.28922133
  0.12200000   2.28922097
  0.12220000   2.28992755
  0.12220000   2.28992587
  0.12220000   2.28992436
  0.12220000   2.28992299
  0.12220000   2.28992174
  0.12220000   2.28992059
  0.12220000   2.28991954
  0.12220000   2.28991858
  0.12220000   2.28991768
  0.12220000   2.28991685
  0.12220000   2.28991608
  0.12220000   2.28991536
  0.12220000   2.28991469
  0.12220000   2.28991406
  0.12220000   2.28991347
  0.12220000   2.28991292
  0.12220000   2.28991239
  0.12220000   2.28991190
  0.12220000   2.28991143
  0.12220000   2.28991099
  0.12220000   2.28991057
  0.12220000   2.28991017
  0.12220000   2.28990979
  0.12220000   2.28990943
  0.12240000   2.29061098
  0.12240000   2.29060930
  0.12240000   2.29060778
  0.12240000   2.29060641
  0.12240000   2.29060516
  0.12240000   2.29060402
  0.12240000   2.29060297
  0.12240000   2.29060200
  0.12240000   2.29060111
  0.12240000   2.29060028
  0.12240000   2.29059951
  0.12240000   2.29059879
  0.12240000   2.29059811
  0.12240000   2.29059748
  0.12240000   2.29059689
  0.12240000   2.29059634
  0.12240000   2.29059581
  0.12240000   2.29059532
  0.12240000   2.29059485
  0.12240000   2.29059440
  0.12240000   2.29059398
  0.12240000   2.29059358
  0.12240000   2.29059320
  0.12240000   2.29059284
  0.12260000   2.29128941
  0.12260000   2.29128773
  0.12260000   2.29128622
  0.12260000   2.29128485
  0.12260000   2.29128360
  0.12260000   2.29128245
  0.12260000   2.29128140
  0.12260000   2.29128044
  0.12260000   2.29127954
  0.12260000   2.29127871
  0.12260000   2.29127794
  0.12260000   2.29127722
  0.12260000   2.29127655
  0.12260000   2.29127592
  0.12260000   2.29127533
  0.12260000   2.29127477
  0.12260000   2.29127424
  0.12260000   2.29127375
  0.12260000   2.29127328
  0.12260000   2.29127283
  0.12260000   2.29127241
  0.12260000   2.29127201
  0.12260000   2.29127163
  0.12260000   2.29127127
  0.12280000   2.29196291
  0.12280000   2.29196123
  0.12280000   2.29195972
  0.12280000   2.29195835
  0.12280000   2.29195710
  0.12280000   2.29195595
  0.12280000   2.29195490
  0.12280000   2.29195394
  0.12280000   2.29195304
  0.12280000   2.29195221
  0.12280000   2.29195144
  0.12280000   2.29195072
  0.12280000   2.29195005
  0.12280000   2.29194941
  0.12280000   2.29194882
  0.12280000   2.29194827
  0.12280000   2.29194774
  0.12280000   2.29194724
  0.12280000   2.29194677
  0.12280000   2.29194633
  0.12280000   2.29194591
  0.12280000   2.29194551
  0.12280000   2.29194513
  0.12280000   2.29194476
  0.12300000   2.29263152
  0.12300000   2.29262985
  0.12300000   2.29262834
  0.12300000   2.29262697
  0.12300000   2.29262572
  0.12300000   2.29262457
  0.12300000   2.29262352
  0.12300000   2.29262255
  0.12300000   2.29262166
  0.12300000   2.29262083
  0.12300000   2.29262006
  0.12300000   2.29261933
  0.12300000   2.29261866
  0.12300000   2.29261803
  0.12300000   2.29261744
  0.12300000   2.29261688
  0.12300000   2.29261635
  0.12300000   2.29261586
  0.12300000   2.29261539
  0.12300000   2.29261494
  0.12300000   2.29261452
  0.12300000   2.29261412
  0.12300000   2.29261374
  0.12300000   2.29261337
  0.12320000   2.29329531
  0.12320000   2.29329363
  0.12320000   2.29329212
  0.12320000   2.29329075
  0.12320000   2.29328950
  0.12320000   2.29328836
  0.12320000   2.29328731
  0.12320000   2.29328634
  0.12320000   2.29328544
  0.12320000   2.29328461
  0.12320000   2.29328384
  0.12320000   2.29328312
  0.12320000   2.29328244
  0.12320000   2.29328181
  0.12320000   2.29328122
  0.12320000   2.29328066
  0.12320000   2.29328013
  0.12320000   2.29327964
  0.12320000   2.29327917
  0.12320000   2.29327872
  0.12320000   2.29327830
  0.12320000   2.29327790
  0.12320000   2.29327751
  0.12320000   2.29327715
  0.12340000   2.29395431
  0.12340000   2.29395264
  0.12340000   2.29395113
  0.12340000   2.29394976
  0.12340000   2.29394851
  0.12340000   2.29394736
  0.12340000   2.29394631
  0.12340000   2.29394534
  0.12340000   2.29394445
  0.12340000   2.29394362
  0.12340000   2.29394284
  0.12340000   2.29394212
  0.12340000   2.29394145
  0.12340000   2.29394081
  0.12340000   2.29394022
  0.12340000   2.29393966
  0.12340000   2.29393913
  0.12340000   2.29393864
  0.12340000   2.29393817
  0.12340000   2.29393772
  0.12340000   2.29393730
  0.12340000   2.29393690
  0.12340000   2.29393651
  0.12340000   2.29393615
  0.12360000   2.29460859
  0.12360000   2.29460691
  0.12360000   2.29460540
  0.12360000   2.29460403
  0.12360000   2.29460278
  0.12360000   2.29460164
  0.12360000   2.29460059
  0.12360000   2.29459962
  0.12360000   2.29459872
  0.12360000   2.29459789
  0.12360000   2.29459712
  0.12360000   2.29459639
  0.12360000   2.29459572
  0.12360000   2.29459509
  0.12360000   2.29459449
  0.12360000   2.29459393
  0.12360000   2.29459340
  0.12360000   2.29459291
  0.12360000   2.29459243
  0.12360000   2.29459199
  0.12360000   2.29459157
  0.12360000   2.29459116
  0.12360000   2.29459078
  0.12360000   2.29459042
  0.12380000   2.29525818
  0.12380000   2.29525650
  0.12380000   2.29525499
  0.12380000   2.29525362
  0.12380000   2.29525237
  0.12380000   2.29525123
  0.12380000   2.29525018
  0.12380000   2.29524921
  0.12380000   2.29524831
  0.12380000   2.29524748
  0.12380000   2.29524671
  0.12380000   2.29524598
  0.12380000   2.29524531
  0.12380000   2.29524468
  0.12380000   2.29524408
  0.12380000   2.29524352
  0.12380000   2.29524299
  0.12380000   2.29524249
  0.12380000   2.29524202
  0.12380000   2.29524158
  0.12380000   2.29524115
  0.12380000   2.29524075
  0.12380000   2.29524037
  0.12380000   2.29524000
  0.12400000   2.29590314
  0.12400000   2.29590146
  0.12400000   2.29589995
  0.12400000   2.29589859
  0.12400000   2.29589734
  0.12400000   2.29589619
  0.12400000   2.29589514
  0.12400000   2.29589417
  0.12400000   2.29589327
  0.12400000   2.29589244
  0.12400000   2.29589167
  0.12400000   2.29589094
  0.12400000   2.29589027
  0.12400000   2.29588963
  0.12400000   2.29588904
  0.12400000   2.29588848
  0.12400000   2.29588795
  0.12400000   2.29588745
  0.12400000   2.29588698
  0.12400000   2.29588653
  0.12400000   2.29588610
  0.12400000   2.29588570
  0.12400000   2.29588532
  0.12400000   2.29588495
  0.12420000   2.29654351
  0.12420000   2.29654184
  0.12420000   2.29654033
  0.12420000   2.29653896
  0.12420000   2.29653771
  0.12420000   2.29653657
  0.12420000   2.29653552
  0.12420000   2.29653455
  0.12420000   2.29653365
  0.12420000   2.29653282
  0.12420000   2.29653204
  0.12420000   2.29653132
  0.12420000   2.29653064
  0.12420000   2.29653001
  0.12420000   2.29652941
  0.12420000   2.29652885
  0.12420000   2.29652832
  0.12420000   2.29652782
  0.12420000   2.29652735
  0.12420000   2.29652690
  0.12420000   2.29652647
  0.12420000   2.29652607
  0.12420000   2.29652569
  0.12420000   2.29652532
  0.12440000   2.29717935
  0.12440000   2.29717768
  0.12440000   2.29717617
  0.12440000   2.29717480
  0.12440000   2.29717355
  0.12440000   2.29717241
  0.12440000   2.29717135
  0.12440000   2.29717038
  0.12440000   2.29716949
  0.12440000   2.29716865
  0.12440000   2.29716788
  0.12440000   2.29716715
  0.12440000   2.29716647
  0.12440000   2.29716584
  0.12440000   2.29716524
  0.12440000   2.29716468
  0.12440000   2.29716415
  0.12440000   2.29716365
  0.12440000   2.29716318
  0.12440000   2.29716273
  0.12440000   2.29716230
  0.12440000   2.29716190
  0.12440000   2.29716152
  0.12440000   2.29716115
  0.12460000   2.29781069
  0.12460000   2.29780902
  0.12460000   2.29780751
  0.12460000   2.29780615
  0.12460000   2.29780490
  0.12460000   2.29780375
  0.12460000   2.29780270
  0.12460000   2.29780173
  0.12460000   2.29780083
  0.12460000   2.29780000
  0.12460000   2.29779922
  0.12460000   2.29779850
  0.12460000   2.29779782
  0.12460000   2.29779718
  0.12460000   2.29779659
  0.12460000   2.29779602
  0.12460000   2.29779549
  0.12460000   2.29779499
  0.12460000   2.29779452
  0.12460000   2.29779407
  0.12460000   2.29779364
  0.12460000   2.29779324
  0.12460000   2.29779285
  0.12460000   2.29779249
  0.12480000   2.29843760
  0.12480000   2.29843593
  0.12480000   2.29843442
  0.12480000   2.29843305
  0.12480000   2.29843180
  0.12480000   2.29843065
  0.12480000   2.29842960
  0.12480000   2.29842863
  0.12480000   2.29842773
  0.12480000   2.29842690
  0.12480000   2.29842612
  0.12480000   2.29842540
  0.12480000   2.29842472
  0.12480000   2.29842408
  0.12480000   2.29842348
  0.12480000   2.29842292
  0.12480000   2.29842239
  0.12480000   2.29842189
  0.12480000   2.29842141
  0.12480000   2.29842097
  0.12480000   2.29842054
  0.12480000   2.29842013
  0.12480000   2.29841975
  0.12480000   2.29841938
  0.12500000   2.29906010
  0.12500000   2.29905843
  0.12500000   2.29905692
  0.12500000   2.29905555
  0.12500000   2.29905430
  0.12500000   2.29905316
  0.12500000   2.29905210
  0.12500000   2.29905113
  0.12500000   2.29905023
  0.12500000   2.29904940
  0.12500000   2.29904862
  0.12500000   2.29904789
  0.12500000   2.29904721
  0.12500000   2.29904658
  0.12500000   2.29904598
  0.12500000   2.29904542
  0.12500000   2.29904489
  0.12500000   2.29904438
  0.12500000   2.29904391
  0.12500000   2.29904346
  0.12500000   2.29904303
  0.12500000   2.29904263
  0.12500000   2.29904224
  0.12500000   2.29904187
  0.12520000   2.29967824
  0.12520000   2.29967657
  0.12520000   2.29967507
  0.12520000   2.29967370
  0.12520000   2.29967245
  0.12520000   2.29967130
  0.12520000   2.29967025
  0.12520000   2.29966928
  0.12520000   2.29966838
  0.12520000   2.29966754
  0.12520000   2.29966676
  0.12520000   2.29966604
  0.12520000   2.29966536
  0.12520000   2.29966472
  0.12520000   2.29966412
  0.12520000   2.29966356
  0.12520000   2.29966303
  0.12520000   2.29966252
  0.12520000   2.29966205
  0.12520000   2.29966160
  0.12520000   2.29966117
  0.12520000   2.29966077
  0.12520000   2.29966038
  0.12520000   2.29966001
  0.12540000   2.30029207
  0.12540000   2.30029041
  0.12540000   2.30028890
  0.12540000   2.30028753
  0.12540000   2.30028628
  0.12540000   2.30028514
  0.12540000   2.30028408
  0.12540000   2.30028311
  0.12540000   2.30028221
  0.12540000   2.30028137
  0.12540000   2.30028060
  0.12540000   2.30027987
  0.12540000   2.30027919
  0.12540000   2.30027855
  0.12540000   2.30027795
  0.12540000   2.30027739
  0.12540000   2.30027686
  0.12540000   2.30027635
  0.12540000   2.30027588
  0.12540000   2.30027543
  0.12540000   2.30027500
  0.12540000   2.30027459
  0.12540000   2.30027421
  0.12540000   2.30027384
  0.12560000   2.30090164
  0.12560000   2.30089997
  0.12560000   2.30089847
  0.12560000   2.30089710
  0.12560000   2.30089585
  0.12560000   2.30089470
  0.12560000   2.30089365
  0.12560000   2.30089268
  0.12560000   2.30089178
  0.12560000   2.30089094
  0.12560000   2.30089016
  0.12560000   2.30088943
  0.12560000   2.30088875
  0.12560000   2.30088811
  0.12560000   2.30088752
  0.12560000   2.30088695
  0.12560000   2.30088642
  0.12560000   2.30088591
  0.12560000   2.30088544
  0.12560000   2.30088499
  0.12560000   2.30088456
  0.12560000   2.30088415
  0.12560000   2.30088376
  0.12560000   2.30088339
  0.12580000   2.30150698
  0.12580000   2.30150532
  0.12580000   2.30150381
  0.12580000   2.30150244
  0.12580000   2.30150119
  0.12580000   2.30150004
  0.12580000   2.30149899
  0.12580000   2.30149802
  0.12580000   2.30149712
  0.12580000   2.30149628
  0.12580000   2.30149550
  0.12580000   2.30149477
  0.12580000   2.30149409
  0.12580000   2.30149345
  0.12580000   2.30149285
  0.12580000   2.30149229
  0.12580000   2.30149175
  0.12580000   2.30149125
  0.12580000   2.30149077
  0.12580000   2.30149032
  0.12580000   2.30148989
  0.12580000   2.30148948
  0.12580000   2.30148910
  0.12580000   2.30148873
  0.12600000   2.30210814
  0.12600000   2.30210647
  0.12600000   2.30210497
  0.12600000   2.30210360
  0.12600000   2.30210235
  0.12600000   2.30210120
  0.12600000   2.30210015
  0.12600000   2.30209917
  0.12600000   2.30209827
  0.12600000   2.30209743
  0.12600000   2.30209666
  0.12600000   2.30209593
  0.12600000   2.30209525
  0.12600000   2.30209461
  0.12600000   2.30209401
  0.12600000   2.30209344
  0.12600000   2.30209291
  0.12600000   2.30209240
  0.12600000   2.30209192
  0.12600000   2.30209147
  0.12600000   2.30209104
  0.12600000   2.30209063
  0.12600000   2.30209025
  0.12600000   2.30208987
  0.12620000   2.30270516
  0.12620000   2.30270349
  0.12620000   2.30270198
  0.12620000   2.30270061
  0.12620000   2.30269936
  0.12620000   2.30269822
  0.12620000   2.30269716
  0.12620000   2.30269619
  0.12620000   2.30269529
  0.12620000   2.30269445
  0.12620000   2.30269367
  0.12620000   2.30269294
  0.12620000   2.30269226
  0.12620000   2.30269162
  0.12620000   2.30269102
  0.12620000   2.30269045
  0.12620000   2.30268992
  0.12620000   2.30268941
  0.12620000   2.30268893
  0.12620000   2.30268848
  0.12620000   2.30268805
  0.12620000   2.30268764
  0.12620000   2.30268725
  0.12620000   2.30268688
  0.12640000   2.30329807
  0.12640000   2.30329641
  0.12640000   2.30329490
  0.12640000   2.30329353
  0.12640000   2.30329228
  0.12640000   2.30329113
  0.12640000   2.30329008
  0.12640000   2.30328911
  0.12640000   2.30328820
  0.12640000   2.30328736
  0.12640000   2.30328658
  0.12640000   2.30328585
  0.12640000   2.30328517
  0.12640000   2.30328453
  0.12640000   2.30328393
  0.12640000   2.30328336
  0.12640000   2.30328283
  0.12640000   2.30328232
  0.12640000   2.30328184
  0.12640000   2.30328139
  0.12640000   2.30328096
  0.12640000   2.30328055
  0.12640000   2.30328016
  0.12640000   2.30327979
  0.12660000   2.30388693
  0.12660000   2.30388526
  0.12660000   2.30388376
  0.12660000   2.30388239
  0.12660000   2.30388114
  0.12660000   2.30387999
  0.12660000   2.30387893
  0.12660000   2.30387796
  0.12660000   2.30387706
  0.12660000   2.30387622
  0.12660000   2.30387544
  0.12660000   2.30387471
  0.12660000   2.30387402
  0.12660000   2.30387338
  0.12660000   2.30387278
  0.12660000   2.30387221
  0.12660000   2.30387168
  0.12660000   2.30387117
  0.12660000   2.30387069
  0.12660000   2.30387024
  0.12660000   2.30386981
  0.12660000   2.30386940
  0.12660000   2.30386901
  0.12660000   2.30386864
  0.12680000   2.30447176
  0.12680000   2.30447010
  0.12680000   2.30446859
  0.12680000   2.30446722
  0.12680000   2.30446597
  0.12680000   2.30446483
  0.12680000   2.30446377
  0.12680000   2.30446279
  0.12680000   2.30446189
  0.12680000   2.30446105
  0.12680000   2.30446027
  0.12680000   2.30445954
  0.12680000   2.30445886
  0.12680000   2.30445821
  0.12680000   2.30445761
  0.12680000   2.30445704
  0.12680000   2.30445651
  0.12680000   2.30445600
  0.12680000   2.30445552
  0.12680000   2.30445507
  0.12680000   2.30445464
  0.12680000   2.30445423
  0.12680000   2.30445383
  0.12680000   2.30445346
  0.12700000   2.30505262
  0.12700000   2.30505096
  0.12700000   2.30504945
  0.12700000   2.30504808
  0.12700000   2.30504683
  0.12700000   2.30504568
  0.12700000   2.30504462
  0.12700000   2.30504365
  0.12700000   2.30504274
  0.12700000   2.30504190
  0.12700000   2.30504112
  0.12700000   2.30504039
  0.12700000   2.30503971
  0.12700000   2.30503906
  0.12700000   2.30503846
  0.12700000   2.30503789
  0.12700000   2.30503736
  0.12700000   2.30503685
  0.12700000   2.30503637
  0.12700000   2.30503591
  0.12700000   2.30503548
  0.12700000   2.30503507
  0.12700000   2.30503468
  0.12700000   2.30503431
  0.12720000   2.30562953
  0.12720000   2.30562787
  0.12720000   2.30562636
  0.12720000   2.30562499
  0.12720000   2.30562374
  0.12720000   2.30562259
  0.12720000   2.30562154
  0.12720000   2.30562056
  0.12720000   2.30561966
  0.12720000   2.30561882
  0.12720000   2.30561803
  0.12720000   2.30561730
  0.12720000   2.30561662
  0.12720000   2.30561597
  0.12720000   2.30561537
  0.12720000   2.30561480
  0.12720000   2.30561426
  0.12720000   2.30561376
  0.12720000   2.30561328
  0.12720000   2.30561282
  0.12720000   2.30561239
  0.12720000   2.30561198
  0.12720000   2.30561159
  0.12720000   2.30561121
  0.12740000   2.30620254
  0.12740000   2.30620088
  0.12740000   2.30619937
  0.12740000   2.30619800
  0.12740000   2.30619675
  0.12740000   2.30619560
  0.12740000   2.30619454
  0.12740000   2.30619357
  0.12740000   2.30619266
  0.12740000   2.30619182
  0.12740000   2.30619104
  0.12740000   2.30619031
  0.12740000   2.30618962
  0.12740000   2.30618898
  0.12740000   2.30618837
  0.12740000   2.30618780
  0.12740000   2.30618727
  0.12740000   2.30618676
  0.12740000   2.30618628
  0.12740000   2.30618582
  0.12740000   2.30618539
  0.12740000   2.30618498
  0.12740000   2.30618458
  0.12740000   2.30618421
  0.12760000   2.30677169
  0.12760000   2.30677002
  0.12760000   2.30676852
  0.12760000   2.30676715
  0.12760000   2.30676589
  0.12760000   2.30676474
  0.12760000   2.30676369
  0.12760000   2.30676271
  0.12760000   2.30676181
  0.12760000   2.30676096
  0.12760000   2.30676018
  0.12760000   2.30675945
  0.12760000   2.30675876
  0.12760000   2.30675812
  0.12760000   2.30675751
  0.12760000   2.30675694
  0.12760000   2.30675640
  0.12760000   2.30675589
  0.12760000   2.30675541
  0.12760000   2.30675496
  0.12760000   2.30675452
  0.12760000   2.30675411
  0.12760000   2.30675372
  0.12760000   2.30675334
  0.12780000   2.30733700
  0.12780000   2.30733534
  0.12780000   2.30733383
  0.12780000   2.30733246
  0.12780000   2.30733121
  0.12780000   2.30733006
  0.12780000   2.30732900
  0.12780000   2.30732802
  0.12780000   2.30732712
  0.12780000   2.30732628
  0.12780000   2.30732549
  0.12780000   2.30732476
  0.12780000   2.30732407
  0.12780000   2.30732343
  0.12780000   2.30732282
  0.12780000   2.30732225
  0.12780000   2.30732171
  0.12780000   2.30732120
  0.12780000   2.30732072
  0.12780000   2.30732026
  0.12780000   2.30731983
  0.12780000   2.30731942
  0.12780000   2.30731902
  0.12780000   2.30731865
  0.12800000   2.30789852
  0.12800000   2.30789686
  0.12800000   2.30789535
  0.12800000   2.30789398
  0.12800000   2.30789273
  0.12800000   2.30789158
  0.12800000   2.30789052
  0.12800000   2.30788955
  0.12800000   2.30788864
  0.12800000   2.30788780
  0.12800000   2.30788701
  0.12800000   2.30788628
  0.12800000   2.30788559
  0.12800000   2.30788495
  0.12800000   2.30788434
  0.12800000   2.30788377
  0.12800000   2.30788323
  0.12800000   2.30788272
  0.12800000   2.30788224
  0.12800000   2.30788178
  0.12800000   2.30788134
  0.12800000   2.30788093
  0.12800000   2.30788054
  0.12800000   2.30788016
  0.12820000   2.30845629
  0.12820000   2.30845463
  0.12820000   2.30845312
  0.12820000   2.30845175
  0.12820000   2.30845050
  0.12820000   2.30844935
  0.12820000   2.30844829
  0.12820000   2.30844731
  0.12820000   2.30844640
  0.12820000   2.30844556
  0.12820000   2.30844478
  0.12820000   2.30844404
  0.12820000   2.30844335
  0.12820000   2.30844271
  0.12820000   2.30844210
  0.12820000   2.30844153
  0.12820000   2.30844099
  0.12820000   2.30844048
  0.12820000   2.30844000
  0.12820000   2.30843954
  0.12820000   2.30843910
  0.12820000   2.30843869
  0.12820000   2.30843830
  0.12820000   2.30843792
  0.12840000   2.30901034
  0.12840000   2.30900868
  0.12840000   2.30900717
  0.12840000   2.30900580
  0.12840000   2.30900455
  0.12840000   2.30900340
  0.12840000   2.30900234
  0.12840000   2.30900136
  0.12840000   2.30900045
  0.12840000   2.30899961
  0.12840000   2.30899882
  0.12840000   2.30899809
  0.12840000   2.30899740
  0.12840000   2.30899675
  0.12840000   2.30899614
  0.12840000   2.30899557
  0.12840000   2.30899503
  0.12840000   2.30899452
  0.12840000   2.30899404
  0.12840000   2.30899358
  0.12840000   2.30899314
  0.12840000   2.30899273
  0.12840000   2.30899233
  0.12840000   2.30899196
  0.12860000   2.30956071
  0.12860000   2.30955904
  0.12860000   2.30955754
  0.12860000   2.30955616
  0.12860000   2.30955491
  0.12860000   2.30955376
  0.12860000   2.30955270
  0.12860000   2.30955172
  0.12860000   2.30955081
  0.12860000   2.30954997
  0.12860000   2.30954918
  0.12860000   2.30954845
  0.12860000   2.30954776
  0.12860000   2.30954711
  0.12860000   2.30954650
  0.12860000   2.30954593
  0.12860000   2.30954539
  0.12860000   2.30954488
  0.12860000   2.30954439
  0.12860000   2.30954393
  0.12860000   2.30954350
  0.12860000   2.30954308
  0.12860000   2.30954269
  0.12860000   2.30954231
  0.12880000   2.31010742
  0.12880000   2.31010576
  0.12880000   2.31010425
  0.12880000   2.31010288
  0.12880000   2.31010163
  0.12880000   2.31010047
  0.12880000   2.31009941
  0.12880000   2.31009843
  0.12880000   2.31009752
  0.12880000   2.31009668
  0.12880000   2.31009589
  0.12880000   2.31009516
  0.12880000   2.31009447
  0.12880000   2.31009382
  0.12880000   2.31009321
  0.12880000   2.31009264
  0.12880000   2.31009210
  0.12880000   2.31009158
  0.12880000   2.31009110
  0.12880000   2.31009064
  0.12880000   2.31009020
  0.12880000   2.31008979
  0.12880000   2.31008939
  0.12880000   2.31008902
  0.12900000   2.31065052
  0.12900000   2.31064886
  0.12900000   2.31064735
  0.12900000   2.31064598
  0.12900000   2.31064472
  0.12900000   2.31064357
  0.12900000   2.31064251
  0.12900000   2.31064153
  0.12900000   2.31064062
  0.12900000   2.31063978
  0.12900000   2.31063899
  0.12900000   2.31063825
  0.12900000   2.31063756
  0.12900000   2.31063691
  0.12900000   2.31063630
  0.12900000   2.31063573
  0.12900000   2.31063519
  0.12900000   2.31063468
  0.12900000   2.31063419
  0.12900000   2.31063373
  0.12900000   2.31063329
  0.12900000   2.31063288
  0.12900000   2.31063248
  0.12900000   2.31063211
  0.12920000   2.31119004
  0.12920000   2.31118838
  0.12920000   2.31118687
  0.12920000   2.31118550
  0.12920000   2.31118424
  0.12920000   2.31118309
  0.12920000   2.31118203
  0.12920000   2.31118105
  0.12920000   2.31118014
  0.12920000   2.31117929
  0.12920000   2.31117850
  0.12920000   2.31117777
  0.12920000   2.31117708
  0.12920000   2.31117643
  0.12920000   2.31117582
  0.12920000   2.31117524
  0.12920000   2.31117470
  0.12920000   2.31117419
  0.12920000   2.31117370
  0.12920000   2.31117324
  0.12920000   2.31117280
  0.12920000   2.31117239
  0.12920000   2.31117199
  0.12920000   2.31117161
  0.12940000   2.31172601
  0.12940000   2.31172435
  0.12940000   2.31172284
  0.12940000   2.31172147
  0.12940000   2.31172021
  0.12940000   2.31171906
  0.12940000   2.31171800
  0.12940000   2.31171702
  0.12940000   2.31171611
  0.12940000   2.31171526
  0.12940000   2.31171447
  0.12940000   2.31171373
  0.12940000   2.31171304
  0.12940000   2.31171239
  0.12940000   2.31171178
  0.12940000   2.31171121
  0.12940000   2.31171066
  0.12940000   2.31171015
  0.12940000   2.31170966
  0.12940000   2.31170920
  0.12940000   2.31170876
  0.12940000   2.31170835
  0.12940000   2.31170795
  0.12940000   2.31170757
  0.12960000   2.31225847
  0.12960000   2.31225681
  0.12960000   2.31225530
  0.12960000   2.31225392
  0.12960000   2.31225267
  0.12960000   2.31225152
  0.12960000   2.31225045
  0.12960000   2.31224947
  0.12960000   2.31224856
  0.12960000   2.31224771
  0.12960000   2.31224692
  0.12960000   2.31224619
  0.12960000   2.31224549
  0.12960000   2.31224484
  0.12960000   2.31224423
  0.12960000   2.31224366
  0.12960000   2.31224311
  0.12960000   2.31224260
  0.12960000   2.31224211
  0.12960000   2.31224165
  0.12960000   2.31224121
  0.12960000   2.31224080
  0.12960000   2.31224040
  0.12960000   2.31224002
  0.12980000   2.31278744
  0.12980000   2.31278578
  0.12980000   2.31278427
  0.12980000   2.31278290
  0.12980000   2.31278164
  0.12980000   2.31278049
  0.12980000   2.31277943
  0.12980000   2.31277845
  0.12980000   2.31277753
  0.12980000   2.31277669
  0.12980000   2.31277589
  0.12980000   2.31277516
  0.12980000   2.31277446
  0.12980000   2.31277381
  0.12980000   2.31277320
  0.12980000   2.31277263
  0.12980000   2.31277208
  0.12980000   2.31277157
  0.12980000   2.31277108
  0.12980000   2.31277062
  0.12980000   2.31277018
  0.12980000   2.31276976
  0.12980000   2.31276936
  0.12980000   2.31276898
  0.13000000   2.31331297
  0.13000000   2.31331131
  0.13000000   2.31330980
  0.13000000   2.31330843
  0.13000000   2.31330717
  0.13000000   2.31330602
  0.13000000   2.31330495
  0.13000000   2.31330397
  0.13000000   2.31330306
  0.13000000   2.31330221
  0.13000000   2.31330142
  0.13000000   2.31330068
  0.13000000   2.31329998
  0.13000000   2.31329933
  0.13000000   2.31329872
  0.13000000   2.31329814
  0.13000000   2.31329760
  0.13000000   2.31329709
  0.13000000   2.31329660
  0.13000000   2.31329613
  0.13000000   2.31329569
  0.13000000   2.31329528
  0.13000000   2.31329488
  0.13000000   2.31329450
  0.13020000   2.31383508
  0.13020000   2.31383342
  0.13020000   2.31383191
  0.13020000   2.31383053
  0.13020000   2.31382928
  0.13020000   2.31382812
  0.13020000   2.31382706
  0.13020000   2.31382608
  0.13020000   2.31382516
  0.13020000   2.31382431
  0.13020000   2.31382352
  0.13020000   2.31382278
  0.13020000   2.31382209
  0.13020000   2.31382144
  0.13020000   2.31382082
  0.13020000   2.31382025
  0.13020000   2.31381970
  0.13020000   2.31381919
  0.13020000   2.31381870
  0.13020000   2.31381823
  0.13020000   2.31381779
  0.13020000   2.31381738
  0.13020000   2.31381698
  0.13020000   2.31381660
  0.13040000   2.31435380
  0.13040000   2.31435214
  0.13040000   2.31435063
  0.13040000   2.31434926
  0.13040000   2.31434800
  0.13040000   2.31434685
  0.13040000   2.31434578
  0.13040000   2.31434480
  0.13040000   2.31434388
  0.13040000   2.31434303
  0.13040000   2.31434224
  0.13040000   2.31434150
  0.13040000   2.31434080
  0.13040000   2.31434015
  0.13040000   2.31433954
  0.13040000   2.31433896
  0.13040000   2.31433842
  0.13040000   2.31433790
  0.13040000   2.31433741
  0.13040000   2.31433695
  0.13040000   2.31433651
  0.13040000   2.31433609
  0.13040000   2.31433569
  0.13040000   2.31433531
  0.13060000   2.31486917
  0.13060000   2.31486751
  0.13060000   2.31486600
  0.13060000   2.31486463
  0.13060000   2.31486337
  0.13060000   2.31486221
  0.13060000   2.31486115
  0.13060000   2.31486016
  0.13060000   2.31485925
  0.13060000   2.31485840
  0.13060000   2.31485760
  0.13060000   2.31485686
  0.13060000   2.31485617
  0.13060000   2.31485552
  0.13060000   2.31485490
  0.13060000   2.31485432
  0.13060000   2.31485378
  0.13060000   2.31485326
  0.13060000   2.31485277
  0.13060000   2.31485231
  0.13060000   2.31485186
  0.13060000   2.31485145
  0.13060000   2.31485105
  0.13060000   2.31485067
  0.13080000   2.31538121
  0.13080000   2.31537955
  0.13080000   2.31537804
  0.13080000   2.31537667
  0.13080000   2.31537541
  0.13080000   2.31537425
  0.13080000   2.31537319
  0.13080000   2.31537220
  0.13080000   2.31537129
  0.13080000   2.31537044
  0.13080000   2.31536964
  0.13080000   2.31536890
  0.13080000   2.31536821
  0.13080000   2.31536755
  0.13080000   2.31536694
  0.13080000   2.31536636
  0.13080000   2.31536581
  0.13080000   2.31536530
  0.13080000   2.31536480
  0.13080000   2.31536434
  0.13080000   2.31536390
  0.13080000   2.31536348
  0.13080000   2.31536308
  0.13080000   2.31536270
  0.13100000   2.31588996
  0.13100000   2.31588830
  0.13100000   2.31588679
  0.13100000   2.31588542
  0.13100000   2.31588416
  0.13100000   2.31588300
  0.13100000   2.31588194
  0.13100000   2.31588095
  0.13100000   2.31588003
  0.13100000   2.31587918
  0.13100000   2.31587839
  0.13100000   2.31587765
  0.13100000   2.31587695
  0.13100000   2.31587630
  0.13100000   2.31587568
  0.13100000   2.31587510
  0.13100000   2.31587455
  0.13100000   2.31587404
  0.13100000   2.31587355
  0.13100000   2.31587308
  0.13100000   2.31587264
  0.13100000   2.31587222
  0.13100000   2.31587182
  0.13100000   2.31587144
  0.13120000   2.31639545
  0.13120000   2.31639379
  0.13120000   2.31639228
  0.13120000   2.31639090
  0.13120000   2.31638964
  0.13120000   2.31638849
  0.13120000   2.31638742
  0.13120000   2.31638643
  0.13120000   2.31638552
  0.13120000   2.31638466
  0.13120000   2.31638387
  0.13120000   2.31638313
  0.13120000   2.31638243
  0.13120000   2.31638178
  0.13120000   2.31638116
  0.13120000   2.31638058
  0.13120000   2.31638003
  0.13120000   2.31637951
  0.13120000   2.31637902
  0.13120000   2.31637856
  0.13120000   2.31637811
  0.13120000   2.31637769
  0.13120000   2.31637729
  0.13120000   2.31637691
  0.13140000   2.31689770
  0.13140000   2.31689604
  0.13140000   2.31689453
  0.13140000   2.31689315
  0.13140000   2.31689189
  0.13140000   2.31689074
  0.13140000   2.31688967
  0.13140000   2.31688868
  0.13140000   2.31688777
  0.13140000   2.31688691
  0.13140000   2.31688612
  0.13140000   2.31688537
  0.13140000   2.31688468
  0.13140000   2.31688402
  0.13140000   2.31688340
  0.13140000   2.31688282
  0.13140000   2.31688228
  0.13140000   2.31688176
  0.13140000   2.31688127
  0.13140000   2.31688080
  0.13140000   2.31688035
  0.13140000   2.31687993
  0.13140000   2.31687953
  0.13140000   2.31687915
  0.13160000   2.31739675
  0.13160000   2.31739508
  0.13160000   2.31739357
  0.13160000   2.31739220
  0.13160000   2.31739094
  0.13160000   2.31738978
  0.13160000   2.31738871
  0.13160000   2.31738772
  0.13160000   2.31738681
  0.13160000   2.31738595
  0.13160000   2.31738516
  0.13160000   2.31738441
  0.13160000   2.31738372
  0.13160000   2.31738306
  0.13160000   2.31738244
  0.13160000   2.31738186
  0.13160000   2.31738131
  0.13160000   2.31738079
  0.13160000   2.31738030
  0.13160000   2.31737983
  0.13160000   2.31737939
  0.13160000   2.31737897
  0.13160000   2.31737857
  0.13160000   2.31737818
  0.13180000   2.31789262
  0.13180000   2.31789095
  0.13180000   2.31788944
  0.13180000   2.31788807
  0.13180000   2.31788681
  0.13180000   2.31788565
  0.13180000   2.31788458
  0.13180000   2.31788359
  0.13180000   2.31788267
  0.13180000   2.31788182
  0.13180000   2.31788102
  0.13180000   2.31788028
  0.13180000   2.31787958
  0.13180000   2.31787892
  0.13180000   2.31787831
  0.13180000   2.31787772
  0.13180000   2.31787717
  0.13180000   2.31787665
  0.13180000   2.31787616
  0.13180000   2.31787569
  0.13180000   2.31787525
  0.13180000   2.31787483
  0.13180000   2.31787442
  0.13180000   2.31787404
  0.13200000   2.31838534
  0.13200000   2.31838368
  0.13200000   2.31838217
  0.13200000   2.31838079
  0.13200000   2.31837953
  0.13200000   2.31837837
  0.13200000   2.31837730
  0.13200000   2.31837631
  0.13200000   2.31837539
  0.13200000   2.31837454
  0.13200000   2.31837374
  0.13200000   2.31837299
  0.13200000   2.31837230
  0.13200000   2.31837164
  0.13200000   2.31837102
  0.13200000   2.31837044
  0.13200000   2.31836989
  0.13200000   2.31836937
  0.13200000   2.31836887
  0.13200000   2.31836841
  0.13200000   2.31836796
  0.13200000   2.31836754
  0.13200000   2.31836713
  0.13200000   2.31836675
  0.13220000   2.31887494
  0.13220000   2.31887328
  0.13220000   2.31887177
  0.13220000   2.31887039
  0.13220000   2.31886913
  0.13220000   2.31886797
  0.13220000   2.31886690
  0.13220000   2.31886591
  0.13220000   2.31886499
  0.13220000   2.31886413
  0.13220000   2.31886334
  0.13220000   2.31886259
  0.13220000   2.31886189
  0.13220000   2.31886123
  0.13220000   2.31886061
  0.13220000   2.31886003
  0.13220000   2.31885948
  0.13220000   2.31885896
  0.13220000   2.31885846
  0.13220000   2.31885800
  0.13220000   2.31885755
  0.13220000   2.31885713
  0.13220000   2.31885672
  0.13220000   2.31885634
  0.13240000   2.31936145
  0.13240000   2.31935979
  0.13240000   2.31935828
  0.13240000   2.31935690
  0.13240000   2.31935564
  0.13240000   2.31935448
  0.13240000   2.31935340
  0.13240000   2.31935242
  0.13240000   2.31935150
  0.13240000   2.31935064
  0.13240000   2.31934984
  0.13240000   2.31934909
  0.13240000   2.31934839
  0.13240000   2.31934774
  0.13240000   2.31934712
  0.13240000   2.31934653
  0.13240000   2.31934598
  0.13240000   2.31934546
  0.13240000   2.31934496
  0.13240000   2.31934450
  0.13240000   2.31934405
  0.13240000   2.31934363
  0.13240000   2.31934322
  0.13240000   2.31934284
  0.13260000   2.31984490
  0.13260000   2.31984323
  0.13260000   2.31984172
  0.13260000   2.31984034
  0.13260000   2.31983908
  0.13260000   2.31983792
  0.13260000   2.31983685
  0.13260000   2.31983586
  0.13260000   2.31983494
  0.13260000   2.31983408
  0.13260000   2.31983328
  0.13260000   2.31983253
  0.13260000   2.31983183
  0.13260000   2.31983117
  0.13260000   2.31983055
  0.13260000   2.31982997
  0.13260000   2.31982942
  0.13260000   2.31982890
  0.13260000   2.31982840
  0.13260000   2.31982793
  0.13260000   2.31982748
  0.13260000   2.31982706
  0.13260000   2.31982665
  0.13260000   2.31982627
  0.13280000   2.32032530
  0.13280000   2.32032364
  0.13280000   2.32032213
  0.13280000   2.32032075
  0.13280000   2.32031948
  0.13280000   2.32031832
  0.13280000   2.32031725
  0.13280000   2.32031626
  0.13280000   2.32031534
  0.13280000   2.32031448
  0.13280000   2.32031368
  0.13280000   2.32031293
  0.13280000   2.32031223
  0.13280000   2.32031157
  0.13280000   2.32031095
  0.13280000   2.32031037
  0.13280000   2.32030981
  0.13280000   2.32030929
  0.13280000   2.32030880
  0.13280000   2.32030833
  0.13280000   2.32030788
  0.13280000   2.32030746
  0.13280000   2.32030705
  0.13280000   2.32030666
  0.13300000   2.32080270
  0.13300000   2.32080103
  0.13300000   2.32079952
  0.13300000   2.32079814
  0.13300000   2.32079688
  0.13300000   2.32079572
  0.13300000   2.32079465
  0.13300000   2.32079365
  0.13300000   2.32079273
  0.13300000   2.32079187
  0.13300000   2.32079107
  0.13300000   2.32079032
  0.13300000   2.32078962
  0.13300000   2.32078896
  0.13300000   2.32078834
  0.13300000   2.32078776
  0.13300000   2.32078720
  0.13300000   2.32078668
  0.13300000   2.32078618
  0.13300000   2.32078571
  0.13300000   2.32078526
  0.13300000   2.32078484
  0.13300000   2.32078443
  0.13300000   2.32078405
  0.13320000   2.32127711
  0.13320000   2.32127545
  0.13320000   2.32127393
  0.13320000   2.32127255
  0.13320000   2.32127129
  0.13320000   2.32127013
  0.13320000   2.32126905
  0.13320000   2.32126806
  0.13320000   2.32126714
  0.13320000   2.32126628
  0.13320000   2.32126548
  0.13320000   2.32126473
  0.13320000   2.32126403
  0.13320000   2.32126337
  0.13320000   2.32126274
  0.13320000   2.32126216
  0.13320000   2.32126161
  0.13320000   2.32126108
  0.13320000   2.32126058
  0.13320000   2.32126011
  0.13320000   2.32125967
  0.13320000   2.32125924
  0.13320000   2.32125883
  0.13320000   2.32125845
  0.13340000   2.32174857
  0.13340000   2.32174690
  0.13340000   2.32174539
  0.13340000   2.32174401
  0.13340000   2.32174274
  0.13340000   2.32174158
  0.13340000   2.32174050
  0.13340000   2.32173951
  0.13340000   2.32173859
  0.13340000   2.32173773
  0.13340000   2.32173693
  0.13340000   2.32173618
  0.13340000   2.32173547
  0.13340000   2.32173481
  0.13340000   2.32173419
  0.13340000   2.32173360
  0.13340000   2.32173305
  0.13340000   2.32173252
  0.13340000   2.32173203
  0.13340000   2.32173156
  0.13340000   2.32173111
  0.13340000   2.32173068
  0.13340000   2.32173027
  0.13340000   2.32172989
  0.13360000   2.32221709
  0.13360000   2.32221542
  0.13360000   2.32221391
  0.13360000   2.32221253
  0.13360000   2.32221126
  0.13360000   2.32221010
  0.13360000   2.32220902
  0.13360000   2.32220803
  0.13360000   2.32220710
  0.13360000   2.32220624
  0.13360000   2.32220544
  0.13360000   2.32220469
  0.13360000   2.32220399
  0.13360000   2.32220333
  0.13360000   2.32220270
  0.13360000   2.32220212
  0.13360000   2.32220156
  0.13360000   2.32220104
  0.13360000   2.32220054
  0.13360000   2.32220007
  0.13360000   2.32219962
  0.13360000   2.32219919
  0.13360000   2.32219878
  0.13360000   2.32219839
  0.13380000   2.32268270
  0.13380000   2.32268103
  0.13380000   2.32267952
  0.13380000   2.32267814
  0.13380000   2.32267687
  0.13380000   2.32267571
  0.13380000   2.32267463
  0.13380000   2.32267364
  0.13380000   2.32267271
  0.13380000   2.32267185
  0.13380000   2.32267105
  0.13380000   2.32267030
  0.13380000   2.32266959
  0.13380000   2.32266893
  0.13380000   2.32266831
  0.13380000   2.32266772
  0.13380000   2.32266716
  0.13380000   2.32266664
  0.13380000   2.32266614
  0.13380000   2.32266567
  0.13380000   2.32266522
  0.13380000   2.32266479
  0.13380000   2.32266438
  0.13380000   2.32266400
  0.13400000   2.32314543
  0.13400000   2.32314377
  0.13400000   2.32314225
  0.13400000   2.32314087
  0.13400000   2.32313960
  0.13400000   2.32313844
  0.13400000   2.32313736
  0.13400000   2.32313637
  0.13400000   2.32313544
  0.13400000   2.32313458
  0.13400000   2.32313378
  0.13400000   2.32313302
  0.13400000   2.32313232
  0.13400000   2.32313166
  0.13400000   2.32313103
  0.13400000   2.32313044
  0.13400000   2.32312989
  0.13400000   2.32312936
  0.13400000   2.32312886
  0.13400000   2.32312839
  0.13400000   2.32312794
  0.13400000   2.32312751
  0.13400000   2.32312710
  0.13400000   2.32312672
  0.13420000   2.32360531
  0.13420000   2.32360364
  0.13420000   2.32360213
  0.13420000   2.32360074
  0.13420000   2.32359948
  0.13420000   2.32359831
  0.13420000   2.32359723
  0.13420000   2.32359624
  0.13420000   2.32359531
  0.13420000   2.32359445
  0.13420000   2.32359365
  0.13420000   2.32359289
  0.13420000   2.32359219
  0.13420000   2.32359152
  0.13420000   2.32359090
  0.13420000   2.32359031
  0.13420000   2.32358975
  0.13420000   2.32358923
  0.13420000   2.32358873
  0.13420000   2.32358825
  0.13420000   2.32358780
  0.13420000   2.32358737
  0.13420000   2.32358697
  0.13420000   2.32358658
  0.13440000   2.32406235
  0.13440000   2.32406068
  0.13440000   2.32405917
  0.13440000   2.32405778
  0.13440000   2.32405652
  0.13440000   2.32405535
  0.13440000   2.32405427
  0.13440000   2.32405328
  0.13440000   2.32405235
  0.13440000   2.32405149
  0.13440000   2.32405068
  0.13440000   2.32404993
  0.13440000   2.32404922
  0.13440000   2.32404856
  0.13440000   2.32404793
  0.13440000   2.32404734
  0.13440000   2.32404679
  0.13440000   2.32404626
  0.13440000   2.32404576
  0.13440000   2.32404528
  0.13440000   2.32404483
  0.13440000   2.32404441
  0.13440000   2.32404400
  0.13440000   2.32404361
  0.13460000   2.32451659
  0.13460000   2.32451492
  0.13460000   2.32451340
  0.13460000   2.32451202
  0.13460000   2.32451075
  0.13460000   2.32450958
  0.13460000   2.32450851
  0.13460000   2.32450751
  0.13460000   2.32450658
  0.13460000   2.32450572
  0.13460000   2.32450491
  0.13460000   2.32450416
  0.13460000   2.32450345
  0.13460000   2.32450278
  0.13460000   2.32450216
  0.13460000   2.32450157
  0.13460000   2.32450101
  0.13460000   2.32450048
  0.13460000   2.32449998
  0.13460000   2.32449951
  0.13460000   2.32449906
  0.13460000   2.32449863
  0.13460000   2.32449822
  0.13460000   2.32449783
  0.13480000   2.32496804
  0.13480000   2.32496637
  0.13480000   2.32496485
  0.13480000   2.32496347
  0.13480000   2.32496220
  0.13480000   2.32496103
  0.13480000   2.32495995
  0.13480000   2.32495895
  0.13480000   2.32495803
  0.13480000   2.32495716
  0.13480000   2.32495636
  0.13480000   2.32495560
  0.13480000   2.32495489
  0.13480000   2.32495423
  0.13480000   2.32495360
  0.13480000   2.32495301
  0.13480000   2.32495245
  0.13480000   2.32495192
  0.13480000   2.32495142
  0.13480000   2.32495095
  0.13480000   2.32495050
  0.13480000   2.32495007
  0.13480000   2.32494966
  0.13480000   2.32494927
  0.13500000   2.32541673
  0.13500000   2.32541506
  0.13500000   2.32541354
  0.13500000   2.32541215
  0.13500000   2.32541089
  0.13500000   2.32540972
  0.13500000   2.32540864
  0.13500000   2.32540764
  0.13500000   2.32540671
  0.13500000   2.32540585
  0.13500000   2.32540504
  0.13500000   2.32540428
  0.13500000   2.32540358
  0.13500000   2.32540291
  0.13500000   2.32540228
  0.13500000   2.32540169
  0.13500000   2.32540113
  0.13500000   2.32540060
  0.13500000   2.32540010
  0.13500000   2.32539963
  0.13500000   2.32539917
  0.13500000   2.32539874
  0.13500000   2.32539833
  0.13500000   2.32539794
  0.13520000   2.32586268
  0.13520000   2.32586101
  0.13520000   2.32585949
  0.13520000   2.32585811
  0.13520000   2.32585684
  0.13520000   2.32585567
  0.13520000   2.32585459
  0.13520000   2.32585359
  0.13520000   2.32585266
  0.13520000   2.32585180
  0.13520000   2.32585099
  0.13520000   2.32585023
  0.13520000   2.32584952
  0.13520000   2.32584886
  0.13520000   2.32584823
  0.13520000   2.32584764
  0.13520000   2.32584708
  0.13520000   2.32584655
  0.13520000   2.32584604
  0.13520000   2.32584557
  0.13520000   2.32584512
  0.13520000   2.32584468
  0.13520000   2.32584427
  0.13520000   2.32584388
  0.13540000   2.32630592
  0.13540000   2.32630425
  0.13540000   2.32630273
  0.13540000   2.32630135
  0.13540000   2.32630007
  0.13540000   2.32629891
  0.13540000   2.32629783
  0.13540000   2.32629682
  0.13540000   2.32629589
  0.13540000   2.32629503
  0.13540000   2.32629422
  0.13540000   2.32629346
  0.13540000   2.32629275
  0.13540000   2.32629209
  0.13540000   2.32629146
  0.13540000   2.32629087
  0.13540000   2.32629031
  0.13540000   2.32628978
  0.13540000   2.32628927
  0.13540000   2.32628880
  0.13540000   2.32628834
  0.13540000   2.32628791
  0.13540000   2.32628750
  0.13540000   2.32628711
  0.13560000   2.32674647
  0.13560000   2.32674480
  0.13560000   2.32674328
  0.13560000   2.32674189
  0.13560000   2.32674062
  0.13560000   2.32673945
  0.13560000   2.32673837
  0.13560000   2.32673737
  0.13560000   2.32673644
  0.13560000   2.32673557
  0.13560000   2.32673476
  0.13560000   2.32673401
  0.13560000   2.32673330
  0.13560000   2.32673263
  0.13560000   2.32673200
  0.13560000   2.32673141
  0.13560000   2.32673085
  0.13560000   2.32673031
  0.13560000   2.32672981
  0.13560000   2.32672933
  0.13560000   2.32672888
  0.13560000   2.32672845
  0.13560000   2.32672804
  0.13560000   2.32672764
  0.13580000   2.32718435
  0.13580000   2.32718268
  0.13580000   2.32718116
  0.13580000   2.32717977
  0.13580000   2.32717850
  0.13580000   2.32717733
  0.13580000   2.32717625
  0.13580000   2.32717525
  0.13580000   2.32717432
  0.13580000   2.32717345
  0.13580000   2.32717264
  0.13580000   2.32717188
  0.13580000   2.32717117
  0.13580000   2.32717050
  0.13580000   2.32716987
  0.13580000   2.32716928
  0.13580000   2.32716872
  0.13580000   2.32716819
  0.13580000   2.32716768
  0.13580000   2.32716720
  0.13580000   2.32716675
  0.13580000   2.32716632
  0.13580000   2.32716590
  0.13580000   2.32716551
  0.13600000   2.32761959
  0.13600000   2.32761791
  0.13600000   2.32761640
  0.13600000   2.32761501
  0.13600000   2.32761373
  0.13600000   2.32761256
  0.13600000   2.32761148
  0.13600000   2.32761048
  0.13600000   2.32760955
  0.13600000   2.32760868
  0.13600000   2.32760787
  0.13600000   2.32760711
  0.13600000   2.32760640
  0.13600000   2.32760573
  0.13600000   2.32760510
  0.13600000   2.32760450
  0.13600000   2.32760394
  0.13600000   2.32760341
  0.13600000   2.32760291
  0.13600000   2.32760243
  0.13600000   2.32760197
  0.13600000   2.32760154
  0.13600000   2.32760113
  0.13600000   2.32760073
  0.13620000   2.32805220
  0.13620000   2.32805053
  0.13620000   2.32804901
  0.13620000   2.32804762
  0.13620000   2.32804634
  0.13620000   2.32804517
  0.13620000   2.32804409
  0.13620000   2.32804309
  0.13620000   2.32804215
  0.13620000   2.32804129
  0.13620000   2.32804047
  0.13620000   2.32803971
  0.13620000   2.32803900
  0.13620000   2.32803833
  0.13620000   2.32803770
  0.13620000   2.32803711
  0.13620000   2.32803655
  0.13620000   2.32803601
  0.13620000   2.32803551
  0.13620000   2.32803503
  0.13620000   2.32803457
  0.13620000   2.32803414
  0.13620000   2.32803373
  0.13620000   2.32803333
  0.13640000   2.32848221
  0.13640000   2.32848054
  0.13640000   2.32847902
  0.13640000   2.32847763
  0.13640000   2.32847635
  0.13640000   2.32847518
  0.13640000   2.32847410
  0.13640000   2.32847309
  0.13640000   2.32847216
  0.13640000   2.32847129
  0.13640000   2.32847048
  0.13640000   2.32846972
  0.13640000   2.32846901
  0.13640000   2.32846834
  0.13640000   2.32846770
  0.13640000   2.32846711
  0.13640000   2.32846654
  0.13640000   2.32846601
  0.13640000   2.32846551
  0.13640000   2.32846503
  0.13640000   2.32846457
  0.13640000   2.32846414
  0.13640000   2.32846372
  0.13640000   2.32846333
  0.13660000   2.32890964
  0.13660000   2.32890797
  0.13660000   2.32890645
  0.13660000   2.32890506
  0.13660000   2.32890378
  0.13660000   2.32890261
  0.13660000   2.32890152
  0.13660000   2.32890052
  0.13660000   2.32889959
  0.13660000   2.32889872
  0.13660000   2.32889790
  0.13660000   2.32889714
  0.13660000   2.32889643
  0.13660000   2.32889576
  0.13660000   2.32889513
  0.13660000   2.32889453
  0.13660000   2.32889396
  0.13660000   2.32889343
  0.13660000   2.32889293
  0.13660000   2.32889245
  0.13660000   2.32889199
  0.13660000   2.32889155
  0.13660000   2.32889114
  0.13660000   2.32889075
  0.13680000   2.32933451
  0.13680000   2.32933284
  0.13680000   2.32933132
  0.13680000   2.32932993
  0.13680000   2.32932865
  0.13680000   2.32932748
  0.13680000   2.32932639
  0.13680000   2.32932539
  0.13680000   2.32932445
  0.13680000   2.32932358
  0.13680000   2.32932277
  0.13680000   2.32932201
  0.13680000   2.32932129
  0.13680000   2.32932062
  0.13680000   2.32931999
  0.13680000   2.32931939
  0.13680000   2.32931883
  0.13680000   2.32931829
  0.13680000   2.32931779
  0.13680000   2.32931731
  0.13680000   2.32931685
  0.13680000   2.32931641
  0.13680000   2.32931600
  0.13680000   2.32931560
  0.13700000   2.32975685
  0.13700000   2.32975517
  0.13700000   2.32975365
  0.13700000   2.32975226
  0.13700000   2.32975098
  0.13700000   2.32974981
  0.13700000   2.32974872
  0.13700000   2.32974772
  0.13700000   2.32974678
  0.13700000   2.32974591
  0.13700000   2.32974510
  0.13700000   2.32974433
  0.13700000   2.32974362
  0.13700000   2.32974295
  0.13700000   2.32974231
  0.13700000   2.32974172
  0.13700000   2.32974115
  0.13700000   2.32974062
  0.13700000   2.32974011
  0.13700000   2.32973963
  0.13700000   2.32973917
  0.13700000   2.32973874
  0.13700000   2.32973832
  0.13700000   2.32973792
  0.13720000   2.33017667
  0.13720000   2.33017499
  0.13720000   2.33017347
  0.13720000   2.33017208
  0.13720000   2.33017080
  0.13720000   2.33016962
  0.13720000   2.33016854
  0.13720000   2.33016753
  0.13720000   2.33016659
  0.13720000   2.33016572
  0.13720000   2.33016491
  0.13720000   2.33016415
  0.13720000   2.33016343
  0.13720000   2.33016276
  0.13720000   2.33016212
  0.13720000   2.33016153
  0.13720000   2.33016096
  0.13720000   2.33016042
  0.13720000   2.33015992
  0.13720000   2.33015943
  0.13720000   2.33015898
  0.13720000   2.33015854
  0.13720000   2.33015813
  0.13720000   2.33015773
  0.13740000   2.33059399
  0.13740000   2.33059231
  0.13740000   2.33059079
  0.13740000   2.33058940
  0.13740000   2.33058812
  0.13740000   2.33058694
  0.13740000   2.33058586
  0.13740000   2.33058485
  0.13740000   2.33058391
  0.13740000   2.33058304
  0.13740000   2.33058222
  0.13740000   2.33058146
  0.13740000   2.33058074
  0.13740000   2.33058007
  0.13740000   2.33057944
  0.13740000   2.33057884
  0.13740000   2.33057827
  0.13740000   2.33057774
  0.13740000   2.33057723
  0.13740000   2.33057675
  0.13740000   2.33057629
  0.13740000   2.33057585
  0.13740000   2.33057544
  0.13740000   2.33057504
  0.13760000   2.33100883
  0.13760000   2.33100716
  0.13760000   2.33100564
  0.13760000   2.33100424
  0.13760000   2.33100296
  0.13760000   2.33100179
  0.13760000   2.33100070
  0.13760000   2.33099969
  0.13760000   2.33099875
  0.13760000   2.33099788
  0.13760000   2.33099706
  0.13760000   2.33099630
  0.13760000   2.33099558
  0.13760000   2.33099491
  0.13760000   2.33099427
  0.13760000   2.33099367
  0.13760000   2.33099311
  0.13760000   2.33099257
  0.13760000   2.33099206
  0.13760000   2.33099158
  0.13760000   2.33099112
  0.13760000   2.33099068
  0.13760000   2.33099027
  0.13760000   2.33098987
  0.13780000   2.33142123
  0.13780000   2.33141955
  0.13780000   2.33141803
  0.13780000   2.33141663
  0.13780000   2.33141535
  0.13780000   2.33141418
  0.13780000   2.33141309
  0.13780000   2.33141208
  0.13780000   2.33141114
  0.13780000   2.33141027
  0.13780000   2.33140945
  0.13780000   2.33140868
  0.13780000   2.33140797
  0.13780000   2.33140729
  0.13780000   2.33140666
  0.13780000   2.33140606
  0.13780000   2.33140549
  0.13780000   2.33140495
  0.13780000   2.33140444
  0.13780000   2.33140396
  0.13780000   2.33140350
  0.13780000   2.33140306
  0.13780000   2.33140265
  0.13780000   2.33140225
  0.13800000   2.33183118
  0.13800000   2.33182951
  0.13800000   2.33182798
  0.13800000   2.33182659
  0.13800000   2.33182531
  0.13800000   2.33182413
  0.13800000   2.33182304
  0.13800000   2.33182203
  0.13800000   2.33182109
  0.13800000   2.33182022
  0.13800000   2.33181940
  0.13800000   2.33181863
  0.13800000   2.33181792
  0.13800000   2.33181724
  0.13800000   2.33181661
  0.13800000   2.33181600
  0.13800000   2.33181544
  0.13800000   2.33181490
  0.13800000   2.33181439
  0.13800000   2.33181391
  0.13800000   2.33181345
  0.13800000   2.33181301
  0.13800000   2.33181259
  0.13800000   2.33181219
  0.13820000   2.33223873
  0.13820000   2.33223705
  0.13820000   2.33223552
  0.13820000   2.33223413
  0.13820000   2.33223285
  0.13820000   2.33223167
  0.13820000   2.33223058
  0.13820000   2.33222957
  0.13820000   2.33222863
  0.13820000   2.33222775
  0.13820000   2.33222694
  0.13820000   2.33222617
  0.13820000   2.33222545
  0.13820000   2.33222477
  0.13820000   2.33222414
  0.13820000   2.33222354
  0.13820000   2.33222297
  0.13820000   2.33222243
  0.13820000   2.33222192
  0.13820000   2.33222143
  0.13820000   2.33222098
  0.13820000   2.33222054
  0.13820000   2.33222012
  0.13820000   2.33221972
  0.13840000   2.33264387
  0.13840000   2.33264220
  0.13840000   2.33264067
  0.13840000   2.33263927
  0.13840000   2.33263799
  0.13840000   2.33263681
  0.13840000   2.33263572
  0.13840000   2.33263471
  0.13840000   2.33263377
  0.13840000   2.33263289
  0.13840000   2.33263207
  0.13840000   2.33263131
  0.13840000   2.33263059
  0.13840000   2.33262991
  0.13840000   2.33262927
  0.13840000   2.33262867
  0.13840000   2.33262810
  0.13840000   2.33262756
  0.13840000   2.33262705
  0.13840000   2.33262657
  0.13840000   2.33262611
  0.13840000   2.33262567
  0.13840000   2.33262525
  0.13840000   2.33262485
  0.13860000   2.33304664
  0.13860000   2.33304496
  0.13860000   2.33304344
  0.13860000   2.33304204
  0.13860000   2.33304076
  0.13860000   2.33303958
  0.13860000   2.33303849
  0.13860000   2.33303747
  0.13860000   2.33303653
  0.13860000   2.33303566
  0.13860000   2.33303484
  0.13860000   2.33303407
  0.13860000   2.33303335
  0.13860000   2.33303267
  0.13860000   2.33303203
  0.13860000   2.33303143
  0.13860000   2.33303086
  0.13860000   2.33303032
  0.13860000   2.33302981
  0.13860000   2.33302933
  0.13860000   2.33302886
  0.13860000   2.33302842
  0.13860000   2.33302801
  0.13860000   2.33302761
  0.13880000   2.33344705
  0.13880000   2.33344538
  0.13880000   2.33344385
  0.13880000   2.33344245
  0.13880000   2.33344117
  0.13880000   2.33343999
  0.13880000   2.33343889
  0.13880000   2.33343788
  0.13880000   2.33343694
  0.13880000   2.33343606
  0.13880000   2.33343524
  0.13880000   2.33343447
  0.13880000   2.33343375
  0.13880000   2.33343308
  0.13880000   2.33343244
  0.13880000   2.33343183
  0.13880000   2.33343126
  0.13880000   2.33343072
  0.13880000   2.33343021
  0.13880000   2.33342973
  0.13880000   2.33342926
  0.13880000   2.33342882
  0.13880000   2.33342840
  0.13880000   2.33342800
  0.13900000   2.33384513
  0.13900000   2.33384345
  0.13900000   2.33384192
  0.13900000   2.33384052
  0.13900000   2.33383924
  0.13900000   2.33383806
  0.13900000   2.33383696
  0.13900000   2.33383595
  0.13900000   2.33383501
  0.13900000   2.33383413
  0.13900000   2.33383331
  0.13900000   2.33383254
  0.13900000   2.33383182
  0.13900000   2.33383114
  0.13900000   2.33383050
  0.13900000   2.33382990
  0.13900000   2.33382933
  0.13900000   2.33382879
  0.13900000   2.33382827
  0.13900000   2.33382779
  0.13900000   2.33382733
  0.13900000   2.33382688
  0.13900000   2.33382646
  0.13900000   2.33382606
  0.13920000   2.33424088
  0.13920000   2.33423920
  0.13920000   2.33423767
  0.13920000   2.33423627
  0.13920000   2.33423499
  0.13920000   2.33423381
  0.13920000   2.33423271
  0.13920000   2.33423170
  0.13920000   2.33423076
  0.13920000   2.33422988
  0.13920000   2.33422906
  0.13920000   2.33422829
  0.13920000   2.33422757
  0.13920000   2.33422689
  0.13920000   2.33422625
  0.13920000   2.33422564
  0.13920000   2.33422507
  0.13920000   2.33422453
  0.13920000   2.33422402
  0.13920000   2.33422353
  0.13920000   2.33422307
  0.13920000   2.33422263
  0.13920000   2.33422220
  0.13920000   2.33422180
  0.13940000   2.33463433
  0.13940000   2.33463266
  0.13940000   2.33463113
  0.13940000   2.33462973
  0.13940000   2.33462844
  0.13940000   2.33462726
  0.13940000   2.33462616
  0.13940000   2.33462515
  0.13940000   2.33462421
  0.13940000   2.33462332
  0.13940000   2.33462250
  0.13940000   2.33462173
  0.13940000   2.33462101
  0.13940000   2.33462033
  0.13940000   2.33461969
  0.13940000   2.33461908
  0.13940000   2.33461851
  0.13940000   2.33461797
  0.13940000   2.33461746
  0.13940000   2.33461697
  0.13940000   2.33461651
  0.13940000   2.33461607
  0.13940000   2.33461564
  0.13940000   2.33461524
  0.13960000   2.33502550
  0.13960000   2.33502383
  0.13960000   2.33502229
  0.13960000   2.33502089
  0.13960000   2.33501961
  0.13960000   2.33501842
  0.13960000   2.33501733
  0.13960000   2.33501631
  0.13960000   2.33501537
  0.13960000   2.33501449
  0.13960000   2.33501367
  0.13960000   2.33501289
  0.13960000   2.33501217
  0.13960000   2.33501149
  0.13960000   2.33501085
  0.13960000   2.33501024
  0.13960000   2.33500967
  0.13960000   2.33500913
  0.13960000   2.33500862
  0.13960000   2.33500813
  0.13960000   2.33500766
  0.13960000   2.33500722
  0.13960000   2.33500680
  0.13960000   2.33500640
  0.13980000   2.33541441
  0.13980000   2.33541273
  0.13980000   2.33541120
  0.13980000   2.33540980
  0.13980000   2.33540851
  0.13980000   2.33540733
  0.13980000   2.33540623
  0.13980000   2.33540521
  0.13980000   2.33540427
  0.13980000   2.33540339
  0.13980000   2.33540256
  0.13980000   2.33540179
  0.13980000   2.33540107
  0.13980000   2.33540039
  0.13980000   2.33539974
  0.13980000   2.33539914
  0.13980000   2.33539857
  0.13980000   2.33539802
  0.13980000   2.33539751
  0.13980000   2.33539702
  0.13980000   2.33539656
  0.13980000   2.33539611
  0.13980000   2.33539569
  0.13980000   2.33539529
  0.14000000   2.33580106
  0.14000000   2.33579939
  0.14000000   2.33579786
  0.14000000   2.33579646
  0.14000000   2.33579517
  0.14000000   2.33579398
  0.14000000   2.33579288
  0.14000000   2.33579187
  0.14000000   2.33579092
  0.14000000   2.33579004
  0.14000000   2.33578922
  0.14000000   2.33578844
  0.14000000   2.33578772
  0.14000000   2.33578704
  0.14000000   2.33578639
  0.14000000   2.33578579
  0.14000000   2.33578522
  0.14000000   2.33578467
  0.14000000   2.33578416
  0.14000000   2.33578367
  0.14000000   2.33578320
  0.14000000   2.33578276
  0.14000000   2.33578234
  0.14000000   2.33578193
  0.14020000   2.33618549
  0.14020000   2.33618382
  0.14020000   2.33618228
  0.14020000   2.33618088
  0.14020000   2.33617959
  0.14020000   2.33617841
  0.14020000   2.33617731
  0.14020000   2.33617629
  0.14020000   2.33617535
  0.14020000   2.33617446
  0.14020000   2.33617364
  0.14020000   2.33617287
  0.14020000   2.33617214
  0.14020000   2.33617146
  0.14020000   2.33617081
  0.14020000   2.33617021
  0.14020000   2.33616963
  0.14020000   2.33616909
  0.14020000   2.33616857
  0.14020000   2.33616808
  0.14020000   2.33616762
  0.14020000   2.33616717
  0.14020000   2.33616675
  0.14020000   2.33616635
  0.14040000   2.33656771
  0.14040000   2.33656604
  0.14040000   2.33656450
  0.14040000   2.33656310
  0.14040000   2.33656181
  0.14040000   2.33656062
  0.14040000   2.33655952
  0.14040000   2.33655851
  0.14040000   2.33655756
  0.14040000   2.33655667
  0.14040000   2.33655585
  0.14040000   2.33655508
  0.14040000   2.33655435
  0.14040000   2.33655367
  0.14040000   2.33655302
  0.14040000   2.33655241
  0.14040000   2.33655184
  0.14040000   2.33655130
  0.14040000   2.33655078
  0.14040000   2.33655029
  0.14040000   2.33654982
  0.14040000   2.33654938
  0.14040000   2.33654896
  0.14040000   2.33654855
  0.14060000   2.33694773
  0.14060000   2.33694606
  0.14060000   2.33694452
  0.14060000   2.33694312
  0.14060000   2.33694183
  0.14060000   2.33694064
  0.14060000   2.33693954
  0.14060000   2.33693852
  0.14060000   2.33693758
  0.14060000   2.33693669
  0.14060000   2.33693587
  0.14060000   2.33693509
  0.14060000   2.33693437
  0.14060000   2.33693368
  0.14060000   2.33693304
  0.14060000   2.33693243
  0.14060000   2.33693185
  0.14060000   2.33693131
  0.14060000   2.33693079
  0.14060000   2.33693030
  0.14060000   2.33692983
  0.14060000   2.33692939
  0.14060000   2.33692897
  0.14060000   2.33692856
  0.14080000   2.33732558
  0.14080000   2.33732391
  0.14080000   2.33732237
  0.14080000   2.33732097
  0.14080000   2.33731968
  0.14080000   2.33731849
  0.14080000   2.33731739
  0.14080000   2.33731637
  0.14080000   2.33731542
  0.14080000   2.33731453
  0.14080000   2.33731371
  0.14080000   2.33731293
  0.14080000   2.33731220
  0.14080000   2.33731152
  0.14080000   2.33731087
  0.14080000   2.33731027
  0.14080000   2.33730969
  0.14080000   2.33730914
  0.14080000   2.33730863
  0.14080000   2.33730813
  0.14080000   2.33730767
  0.14080000   2.33730722
  0.14080000   2.33730680
  0.14080000   2.33730639
  0.14100000   2.33770126
  0.14100000   2.33769960
  0.14100000   2.33769805
  0.14100000   2.33769665
  0.14100000   2.33769536
  0.14100000   2.33769417
  0.14100000   2.33769307
  0.14100000   2.33769205
  0.14100000   2.33769110
  0.14100000   2.33769021
  0.14100000   2.33768939
  0.14100000   2.33768861
  0.14100000   2.33768788
  0.14100000   2.33768720
  0.14100000   2.33768655
  0.14100000   2.33768594
  0.14100000   2.33768537
  0.14100000   2.33768482
  0.14100000   2.33768430
  0.14100000   2.33768381
  0.14100000   2.33768334
  0.14100000   2.33768290
  0.14100000   2.33768247
  0.14100000   2.33768207
  0.14120000   2.33807481
  0.14120000   2.33807314
  0.14120000   2.33807159
  0.14120000   2.33807019
  0.14120000   2.33806890
  0.14120000   2.33806771
  0.14120000   2.33806661
  0.14120000   2.33806559
  0.14120000   2.33806464
  0.14120000   2.33806375
  0.14120000   2.33806292
  0.14120000   2.33806215
  0.14120000   2.33806142
  0.14120000   2.33806073
  0.14120000   2.33806009
  0.14120000   2.33805948
  0.14120000   2.33805890
  0.14120000   2.33805835
  0.14120000   2.33805783
  0.14120000   2.33805734
  0.14120000   2.33805687
  0.14120000   2.33805643
  0.14120000   2.33805600
  0.14120000   2.33805560
  0.14140000   2.33844622
  0.14140000   2.33844456
  0.14140000   2.33844301
  0.14140000   2.33844161
  0.14140000   2.33844031
  0.14140000   2.33843912
  0.14140000   2.33843802
  0.14140000   2.33843700
  0.14140000   2.33843605
  0.14140000   2.33843516
  0.14140000   2.33843433
  0.14140000   2.33843355
  0.14140000   2.33843282
  0.14140000   2.33843214
  0.14140000   2.33843149
  0.14140000   2.33843088
  0.14140000   2.33843030
  0.14140000   2.33842976
  0.14140000   2.33842924
  0.14140000   2.33842874
  0.14140000   2.33842828
  0.14140000   2.33842783
  0.14140000   2.33842740
  0.14140000   2.33842700
  0.14160000   2.33881553
  0.14160000   2.33881387
  0.14160000   2.33881231
  0.14160000   2.33881091
  0.14160000   2.33880962
  0.14160000   2.33880843
  0.14160000   2.33880732
  0.14160000   2.33880630
  0.14160000   2.33880535
  0.14160000   2.33880446
  0.14160000   2.33880363
  0.14160000   2.33880285
  0.14160000   2.33880212
  0.14160000   2.33880144
  0.14160000   2.33880079
  0.14160000   2.33880018
  0.14160000   2.33879960
  0.14160000   2.33879905
  0.14160000   2.33879853
  0.14160000   2.33879804
  0.14160000   2.33879757
  0.14160000   2.33879712
  0.14160000   2.33879670
  0.14160000   2.33879629
  0.14180000   2.33918274
  0.14180000   2.33918108
  0.14180000   2.33917953
  0.14180000   2.33917812
  0.14180000   2.33917683
  0.14180000   2.33917564
  0.14180000   2.33917453
  0.14180000   2.33917351
  0.14180000   2.33917256
  0.14180000   2.33917167
  0.14180000   2.33917084
  0.14180000   2.33917006
  0.14180000   2.33916933
  0.14180000   2.33916864
  0.14180000   2.33916799
  0.14180000   2.33916738
  0.14180000   2.33916680
  0.14180000   2.33916625
  0.14180000   2.33916573
  0.14180000   2.33916524
  0.14180000   2.33916477
  0.14180000   2.33916432
  0.14180000   2.33916389
  0.14180000   2.33916349
  0.14200000   2.33954787
  0.14200000   2.33954622
  0.14200000   2.33954466
  0.14200000   2.33954326
  0.14200000   2.33954196
  0.14200000   2.33954077
  0.14200000   2.33953966
  0.14200000   2.33953864
  0.14200000   2.33953769
  0.14200000   2.33953680
  0.14200000   2.33953597
  0.14200000   2.33953519
  0.14200000   2.33953445
  0.14200000   2.33953377
  0.14200000   2.33953312
  0.14200000   2.33953250
  0.14200000   2.33953192
  0.14200000   2.33953138
  0.14200000   2.33953086
  0.14200000   2.33953036
  0.14200000   2.33952989
  0.14200000   2.33952944
  0.14200000   2.33952902
  0.14200000   2.33952861
  0.14220000   2.33991094
  0.14220000   2.33990929
  0.14220000   2.33990773
  0.14220000   2.33990633
  0.14220000   2.33990503
  0.14220000   2.33990384
  0.14220000   2.33990273
  0.14220000   2.33990171
  0.14220000   2.33990075
  0.14220000   2.33989986
  0.14220000   2.33989903
  0.14220000   2.33989825
  0.14220000   2.33989752
  0.14220000   2.33989683
  0.14220000   2.33989618
  0.14220000   2.33989557
  0.14220000   2.33989499
  0.14220000   2.33989444
  0.14220000   2.33989392
  0.14220000   2.33989342
  0.14220000   2.33989295
  0.14220000   2.33989250
  0.14220000   2.33989207
  0.14220000   2.33989167
  0.14240000   2.34027197
  0.14240000   2.34027032
  0.14240000   2.34026876
  0.14240000   2.34026736
  0.14240000   2.34026605
  0.14240000   2.34026486
  0.14240000   2.34026375
  0.14240000   2.34026273
  0.14240000   2.34026177
  0.14240000   2.34026088
  0.14240000   2.34026005
  0.14240000   2.34025927
  0.14240000   2.34025854
  0.14240000   2.34025785
  0.14240000   2.34025720
  0.14240000   2.34025658
  0.14240000   2.34025600
  0.14240000   2.34025545
  0.14240000   2.34025493
  0.14240000   2.34025444
  0.14240000   2.34025397
  0.14240000   2.34025352
  0.14240000   2.34025309
  0.14240000   2.34025268
  0.14260000   2.34063096
  0.14260000   2.34062932
  0.14260000   2.34062775
  0.14260000   2.34062635
  0.14260000   2.34062505
  0.14260000   2.34062385
  0.14260000   2.34062275
  0.14260000   2.34062172
  0.14260000   2.34062076
  0.14260000   2.34061987
  0.14260000   2.34061904
  0.14260000   2.34061826
  0.14260000   2.34061753
  0.14260000   2.34061684
  0.14260000   2.34061618
  0.14260000   2.34061557
  0.14260000   2.34061499
  0.14260000   2.34061444
  0.14260000   2.34061392
  0.14260000   2.34061342
  0.14260000   2.34061295
  0.14260000   2.34061250
  0.14260000   2.34061207
  0.14260000   2.34061166
  0.14280000   2.34098794
  0.14280000   2.34098630
  0.14280000   2.34098473
  0.14280000   2.34098333
  0.14280000   2.34098203
  0.14280000   2.34098083
  0.14280000   2.34097972
  0.14280000   2.34097870
  0.14280000   2.34097774
  0.14280000   2.34097685
  0.14280000   2.34097601
  0.14280000   2.34097523
  0.14280000   2.34097450
  0.14280000   2.34097381
  0.14280000   2.34097316
  0.14280000   2.34097254
  0.14280000   2.34097196
  0.14280000   2.34097141
  0.14280000   2.34097088
  0.14280000   2.34097039
  0.14280000   2.34096992
  0.14280000   2.34096947
  0.14280000   2.34096904
  0.14280000   2.34096863
  0.14300000   2.34134292
  0.14300000   2.34134128
  0.14300000   2.34133971
  0.14300000   2.34133831
  0.14300000   2.34133701
  0.14300000   2.34133581
  0.14300000   2.34133470
  0.14300000   2.34133367
  0.14300000   2.34133272
  0.14300000   2.34133182
  0.14300000   2.34133099
  0.14300000   2.34133021
  0.14300000   2.34132947
  0.14300000   2.34132878
  0.14300000   2.34132813
  0.14300000   2.34132751
  0.14300000   2.34132693
  0.14300000   2.34132638
  0.14300000   2.34132585
  0.14300000   2.34132536
  0.14300000   2.34132488
  0.14300000   2.34132443
  0.14300000   2.34132400
  0.14300000   2.34132360
  0.14320000   2.34169592
  0.14320000   2.34169428
  0.14320000   2.34169271
  0.14320000   2.34169131
  0.14320000   2.34169000
  0.14320000   2.34168881
  0.14320000   2.34168769
  0.14320000   2.34168667
  0.14320000   2.34168571
  0.14320000   2.34168481
  0.14320000   2.34168398
  0.14320000   2.34168319
  0.14320000   2.34168246
  0.14320000   2.34168177
  0.14320000   2.34168112
  0.14320000   2.34168050
  0.14320000   2.34167992
  0.14320000   2.34167936
  0.14320000   2.34167884
  0.14320000   2.34167834
  0.14320000   2.34167787
  0.14320000   2.34167742
  0.14320000   2.34167699
  0.14320000   2.34167658
  0.14340000   2.34204694
  0.14340000   2.34204531
  0.14340000   2.34204373
  0.14340000   2.34204233
  0.14340000   2.34204102
  0.14340000   2.34203983
  0.14340000   2.34203872
  0.14340000   2.34203769
  0.14340000   2.34203673
  0.14340000   2.34203584
  0.14340000   2.34203500
  0.14340000   2.34203421
  0.14340000   2.34203348
  0.14340000   2.34203279
  0.14340000   2.34203213
  0.14340000   2.34203152
  0.14340000   2.34203093
  0.14340000   2.34203038
  0.14340000   2.34202986
  0.14340000   2.34202936
  0.14340000   2.34202888
  0.14340000   2.34202843
  0.14340000   2.34202800
  0.14340000   2.34202759
  0.14360000   2.34239601
  0.14360000   2.34239438
  0.14360000   2.34239280
  0.14360000   2.34239141
  0.14360000   2.34239010
  0.14360000   2.34238890
  0.14360000   2.34238779
  0.14360000   2.34238676
  0.14360000   2.34238580
  0.14360000   2.34238490
  0.14360000   2.34238406
  0.14360000   2.34238328
  0.14360000   2.34238254
  0.14360000   2.34238185
  0.14360000   2.34238120
  0.14360000   2.34238058
  0.14360000   2.34237999
  0.14360000   2.34237944
  0.14360000   2.34237892
  0.14360000   2.34237842
  0.14360000   2.34237794
  0.14360000   2.34237749
  0.14360000   2.34237706
  0.14360000   2.34237665
  0.14380000   2.34274315
  0.14380000   2.34274151
  0.14380000   2.34273994
  0.14380000   2.34273854
  0.14380000   2.34273723
  0.14380000   2.34273603
  0.14380000   2.34273491
  0.14380000   2.34273388
  0.14380000   2.34273292
  0.14380000   2.34273203
  0.14380000   2.34273119
  0.14380000   2.34273040
  0.14380000   2.34272967
  0.14380000   2.34272897
  0.14380000   2.34272832
  0.14380000   2.34272770
  0.14380000   2.34272712
  0.14380000   2.34272656
  0.14380000   2.34272604
  0.14380000   2.34272554
  0.14380000   2.34272506
  0.14380000   2.34272461
  0.14380000   2.34272418
  0.14380000   2.34272377
  0.14400000   2.34308836
  0.14400000   2.34308672
  0.14400000   2.34308514
  0.14400000   2.34308374
  0.14400000   2.34308243
  0.14400000   2.34308123
  0.14400000   2.34308012
  0.14400000   2.34307909
  0.14400000   2.34307812
  0.14400000   2.34307723
  0.14400000   2.34307639
  0.14400000   2.34307560
  0.14400000   2.34307487
  0.14400000   2.34307417
  0.14400000   2.34307351
  0.14400000   2.34307290
  0.14400000   2.34307231
  0.14400000   2.34307176
  0.14400000   2.34307123
  0.14400000   2.34307073
  0.14400000   2.34307026
  0.14400000   2.34306980
  0.14400000   2.34306937
  0.14400000   2.34306896
  0.14420000   2.34343166
  0.14420000   2.34343001
  0.14420000   2.34342844
  0.14420000   2.34342703
  0.14420000   2.34342572
  0.14420000   2.34342452
  0.14420000   2.34342341
  0.14420000   2.34342238
  0.14420000   2.34342141
  0.14420000   2.34342052
  0.14420000   2.34341968
  0.14420000   2.34341889
  0.14420000   2.34341815
  0.14420000   2.34341746
  0.14420000   2.34341680
  0.14420000   2.34341618
  0.14420000   2.34341560
  0.14420000   2.34341504
  0.14420000   2.34341452
  0.14420000   2.34341401
  0.14420000   2.34341354
  0.14420000   2.34341309
  0.14420000   2.34341265
  0.14420000   2.34341224
  0.14440000   2.34377307
  0.14440000   2.34377141
  0.14440000   2.34376984
  0.14440000   2.34376843
  0.14440000   2.34376712
  0.14440000   2.34376592
  0.14440000   2.34376480
  0.14440000   2.34376377
  0.14440000   2.34376281
  0.14440000   2.34376191
  0.14440000   2.34376107
  0.14440000   2.34376028
  0.14440000   2.34375954
  0.14440000   2.34375885
  0.14440000   2.34375819
  0.14440000   2.34375757
  0.14440000   2.34375698
  0.14440000   2.34375643
  0.14440000   2.34375590
  0.14440000   2.34375540
  0.14440000   2.34375492
  0.14440000   2.34375447
  0.14440000   2.34375404
  0.14440000   2.34375362
  0.14460000   2.34411259
  0.14460000   2.34411092
  0.14460000   2.34410935
  0.14460000   2.34410794
  0.14460000   2.34410663
  0.14460000   2.34410543
  0.14460000   2.34410432
  0.14460000   2.34410328
  0.14460000   2.34410232
  0.14460000   2.34410142
  0.14460000   2.34410058
  0.14460000   2.34409979
  0.14460000   2.34409905
  0.14460000   2.34409835
  0.14460000   2.34409770
  0.14460000   2.34409708
  0.14460000   2.34409649
  0.14460000   2.34409593
  0.14460000   2.34409540
  0.14460000   2.34409490
  0.14460000   2.34409443
  0.14460000   2.34409397
  0.14460000   2.34409354
  0.14460000   2.34409313
  0.14480000   2.34445026
  0.14480000   2.34444856
  0.14480000   2.34444701
  0.14480000   2.34444558
  0.14480000   2.34444428
  0.14480000   2.34444307
  0.14480000   2.34444196
  0.14480000   2.34444092
  0.14480000   2.34443996
  0.14480000   2.34443906
  0.14480000   2.34443822
  0.14480000   2.34443743
  0.14480000   2.34443669
  0.14480000   2.34443599
  0.14480000   2.34443533
  0.14480000   2.34443471
  0.14480000   2.34443412
  0.14480000   2.34443357
  0.14480000   2.34443304
  0.14480000   2.34443254
  0.14480000   2.34443206
  0.14480000   2.34443161
  0.14480000   2.34443117
  0.14480000   2.34443076
  0.14500000   2.34478607
  0.14500000   2.34478434
  0.14500000   2.34478280
  0.14500000   2.34478137
  0.14500000   2.34478007
  0.14500000   2.34477886
  0.14500000   2.34477775
  0.14500000   2.34477671
  0.14500000   2.34477575
  0.14500000   2.34477485
  0.14500000   2.34477400
  0.14500000   2.34477321
  0.14500000   2.34477247
  0.14500000   2.34477177
  0.14500000   2.34477112
  0.14500000   2.34477049
  0.14500000   2.34476991
  0.14500000   2.34476935
  0.14500000   2.34476882
  0.14500000   2.34476832
  0.14500000   2.34476784
  0.14500000   2.34476738
  0.14500000   2.34476695
  0.14500000   2.34476653
  0.14520000   2.34512005
  0.14520000   2.34511827
  0.14520000   2.34511676
  0.14520000   2.34511532
  0.14520000   2.34511402
  0.14520000   2.34511281
  0.14520000   2.34511169
  0.14520000   2.34511066
  0.14520000   2.34510969
  0.14520000   2.34510879
  0.14520000   2.34510795
  0.14520000   2.34510716
  0.14520000   2.34510641
  0.14520000   2.34510571
  0.14520000   2.34510506
  0.14520000   2.34510443
  0.14520000   2.34510384
  0.14520000   2.34510329
  0.14520000   2.34510276
  0.14520000   2.34510225
  0.14520000   2.34510177
  0.14520000   2.34510132
  0.14520000   2.34510089
  0.14520000   2.34510047
  0.14540000   2.34545220
  0.14540000   2.34545038
  0.14540000   2.34544889
  0.14540000   2.34544743
  0.14540000   2.34544614
  0.14540000   2.34544492
  0.14540000   2.34544381
  0.14540000   2.34544277
  0.14540000   2.34544181
  0.14540000   2.34544091
  0.14540000   2.34544006
  0.14540000   2.34543927
  0.14540000   2.34543853
  0.14540000   2.34543783
  0.14540000   2.34543717
  0.14540000   2.34543655
  0.14540000   2.34543596
  0.14540000   2.34543540
  0.14540000   2.34543487
  0.14540000   2.34543436
  0.14540000   2.34543388
  0.14540000   2.34543343
  0.14540000   2.34543299
  0.14540000   2.34543258
  0.14560000   2.34578256
  0.14560000   2.34578066
  0.14560000   2.34577921
  0.14560000   2.34577773
  0.14560000   2.34577645
  0.14560000   2.34577523
  0.14560000   2.34577412
  0.14560000   2.34577307
  0.14560000   2.34577211
  0.14560000   2.34577121
  0.14560000   2.34577036
  0.14560000   2.34576957
  0.14560000   2.34576883
  0.14560000   2.34576813
  0.14560000   2.34576747
  0.14560000   2.34576684
  0.14560000   2.34576625
  0.14560000   2.34576569
  0.14560000   2.34576516
  0.14560000   2.34576466
  0.14560000   2.34576418
  0.14560000   2.34576372
  0.14560000   2.34576329
  0.14560000   2.34576287
  0.14580000   2.34611112
  0.14580000   2.34610913
  0.14580000   2.34610774
  0.14580000   2.34610622
  0.14580000   2.34610496
  0.14580000   2.34610372
  0.14580000   2.34610262
  0.14580000   2.34610157
  0.14580000   2.34610061
  0.14580000   2.34609971
  0.14580000   2.34609886
  0.14580000   2.34609807
  0.14580000   2.34609733
  0.14580000   2.34609662
  0.14580000   2.34609596
  0.14580000   2.34609534
  0.14580000   2.34609475
  0.14580000   2.34609419
  0.14580000   2.34609366
  0.14580000   2.34609315
  0.14580000   2.34609267
  0.14580000   2.34609221
  0.14580000   2.34609178
  0.14580000   2.34609136
  0.14600000   2.34643790
  0.14600000   2.34643581
  0.14600000   2.34643448
  0.14600000   2.34643293
  0.14600000   2.34643169
  0.14600000   2.34643044
  0.14600000   2.34642934
  0.14600000   2.34642829
  0.14600000   2.34642733
  0.14600000   2.34642642
  0.14600000   2.34642557
  0.14600000   2.34642478
  0.14600000   2.34642404
  0.14600000   2.34642333
  0.14600000   2.34642267
  0.14600000   2.34642205
  0.14600000   2.34642146
  0.14600000   2.34642090
  0.14600000   2.34642036
  0.14600000   2.34641986
  0.14600000   2.34641938
  0.14600000   2.34641892
  0.14600000   2.34641848
  0.14600000   2.34641807
  0.14620000   2.34676293
  0.14620000   2.34676071
  0.14620000   2.34675945
  0.14620000   2.34675785
  0.14620000   2.34675664
  0.14620000   2.34675537
  0.14620000   2.34675428
  0.14620000   2.34675322
  0.14620000   2.34675227
  0.14620000   2.34675135
  0.14620000   2.34675051
  0.14620000   2.34674972
  0.14620000   2.34674897
  0.14620000   2.34674827
  0.14620000   2.34674761
  0.14620000   2.34674698
  0.14620000   2.34674639
  0.14620000   2.34674583
  0.14620000   2.34674530
  0.14620000   2.34674479
  0.14620000   2.34674431
  0.14620000   2.34674385
  0.14620000   2.34674341
  0.14620000   2.34674299
  0.14640000   2.34708621
  0.14640000   2.34708383
  0.14640000   2.34708267
  0.14640000   2.34708101
  0.14640000   2.34707983
  0.14640000   2.34707854
  0.14640000   2.34707746
  0.14640000   2.34707640
  0.14640000   2.34707544
  0.14640000   2.34707453
  0.14640000   2.34707369
  0.14640000   2.34707289
  0.14640000   2.34707214
  0.14640000   2.34707144
  0.14640000   2.34707078
  0.14640000   2.34707015
  0.14640000   2.34706956
  0.14640000   2.34706900
  0.14640000   2.34706846
  0.14640000   2.34706796
  0.14640000   2.34706748
  0.14640000   2.34706702
  0.14640000   2.34706658
  0.14640000   2.34706616
  0.14660000   2.34740776
  0.14660000   2.34740519
  0.14660000   2.34740414
  0.14660000   2.34740241
  0.14660000   2.34740128
  0.14660000   2.34739996
  0.14660000   2.34739890
  0.14660000   2.34739782
  0.14660000   2.34739687
  0.14660000   2.34739595
  0.14660000   2.34739511
  0.14660000   2.34739431
  0.14660000   2.34739357
  0.14660000   2.34739286
  0.14660000   2.34739220
  0.14660000   2.34739157
  0.14660000   2.34739098
  0.14660000   2.34739042
  0.14660000   2.34738988
  0.14660000   2.34738938
  0.14660000   2.34738889
  0.14660000   2.34738843
  0.14660000   2.34738800
  0.14660000   2.34738758
  0.14680000   2.34772761
  0.14680000   2.34772480
  0.14680000   2.34772389
  0.14680000   2.34772207
  0.14680000   2.34772099
  0.14680000   2.34771964
  0.14680000   2.34771860
  0.14680000   2.34771750
  0.14680000   2.34771656
  0.14680000   2.34771564
  0.14680000   2.34771480
  0.14680000   2.34771400
  0.14680000   2.34771325
  0.14680000   2.34771255
  0.14680000   2.34771188
  0.14680000   2.34771126
  0.14680000   2.34771066
  0.14680000   2.34771010
  0.14680000   2.34770957
  0.14680000   2.34770906
  0.14680000   2.34770858
  0.14680000   2.34770812
  0.14680000   2.34770768
  0.14680000   2.34770726
  0.14700000   2.34804575
  0.14700000   2.34804266
  0.14700000   2.34804192
  0.14700000   2.34804000
  0.14700000   2.34803898
  0.14700000   2.34803759
  0.14700000   2.34803657
  0.14700000   2.34803546
  0.14700000   2.34803453
  0.14700000   2.34803360
  0.14700000   2.34803276
  0.14700000   2.34803196
  0.14700000   2.34803122
  0.14700000   2.34803051
  0.14700000   2.34802985
  0.14700000   2.34802922
  0.14700000   2.34802862
  0.14700000   2.34802806
  0.14700000   2.34802752
  0.14700000   2.34802702
  0.14700000   2.34802653
  0.14700000   2.34802607
  0.14700000   2.34802563
  0.14700000   2.34802521
  0.14720000   2.34836222
  0.14720000   2.34835879
  0.14720000   2.34835826
  0.14720000   2.34835621
  0.14720000   2.34835527
  0.14720000   2.34835383
  0.14720000   2.34835284
  0.14720000   2.34835171
  0.14720000   2.34835079
  0.14720000   2.34834985
  0.14720000   2.34834902
  0.14720000   2.34834821
  0.14720000   2.34834747
  0.14720000   2.34834676
  0.14720000   2.34834609
  0.14720000   2.34834546
  0.14720000   2.34834487
  0.14720000   2.34834431
  0.14720000   2.34834377
  0.14720000   2.34834326
  0.14720000   2.34834278
  0.14720000   2.34834232
  0.14720000   2.34834188
  0.14720000   2.34834146
  0.14740000   2.34867703
  0.14740000   2.34867320
  0.14740000   2.34867292
  0.14740000   2.34867071
  0.14740000   2.34866986
  0.14740000   2.34866836
  0.14740000   2.34866741
  0.14740000   2.34866626
  0.14740000   2.34866534
  0.14740000   2.34866440
  0.14740000   2.34866357
  0.14740000   2.34866276
  0.14740000   2.34866202
  0.14740000   2.34866131
  0.14740000   2.34866064
  0.14740000   2.34866001
  0.14740000   2.34865942
  0.14740000   2.34865885
  0.14740000   2.34865832
  0.14740000   2.34865781
  0.14740000   2.34865732
  0.14740000   2.34865686
  0.14740000   2.34865642
  0.14740000   2.34865600
  0.14760000   2.34899019
  0.14760000   2.34898589
  0.14760000   2.34898590
  0.14760000   2.34898351
  0.14760000   2.34898277
  0.14760000   2.34898120
  0.14760000   2.34898029
  0.14760000   2.34897911
  0.14760000   2.34897822
  0.14760000   2.34897726
  0.14760000   2.34897644
  0.14760000   2.34897562
  0.14760000   2.34897488
  0.14760000   2.34897417
  0.14760000   2.34897351
  0.14760000   2.34897287
  0.14760000   2.34897228
  0.14760000   2.34897171
  0.14760000   2.34897118
  0.14760000   2.34897067
  0.14760000   2.34897018
  0.14760000   2.34896972
  0.14760000   2.34896928
  0.14760000   2.34896886
  0.14780000   2.34930173
  0.14780000   2.34929687
  0.14780000   2.34929723
  0.14780000   2.34929462
  0.14780000   2.34929402
  0.14780000   2.34929236
  0.14780000   2.34929150
  0.14780000   2.34929029
  0.14780000   2.34928942
  0.14780000   2.34928844
  0.14780000   2.34928763
  0.14780000   2.34928681
  0.14780000   2.34928607
  0.14780000   2.34928535
  0.14780000   2.34928469
  0.14780000   2.34928406
  0.14780000   2.34928346
  0.14780000   2.34928290
  0.14780000   2.34928236
  0.14780000   2.34928185
  0.14780000   2.34928137
  0.14780000   2.34928090
  0.14780000   2.34928046
  0.14780000   2.34928004
  0.14800000   2.34961166
  0.14800000   2.34960615
  0.14800000   2.34960693
  0.14800000   2.34960404
  0.14800000   2.34960362
  0.14800000   2.34960185
  0.14800000   2.34960106
  0.14800000   2.34959980
  0.14800000   2.34959895
  0.14800000   2.34959796
  0.14800000   2.34959716
  0.14800000   2.34959633
  0.14800000   2.34959560
  0.14800000   2.34959488
  0.14800000   2.34959422
  0.14800000   2.34959358
  0.14800000   2.34959299
  0.14800000   2.34959242
  0.14800000   2.34959188
  0.14800000   2.34959137
  0.14800000   2.34959088
  0.14800000   2.34959042
  0.14800000   2.34958998
  0.14800000   2.34958956
  0.14820000   2.34992001
  0.14820000   2.34991373
  0.14820000   2.34991500
  0.14820000   2.34991180
  0.14820000   2.34991157
  0.14820000   2.34990967
  0.14820000   2.34990897
  0.14820000   2.34990766
  0.14820000   2.34990684
  0.14820000   2.34990583
  0.14820000   2.34990504
  0.14820000   2.34990420
  0.14820000   2.34990347
  0.14820000   2.34990275
  0.14820000   2.34990209
  0.14820000   2.34990145
  0.14820000   2.34990086
  0.14820000   2.34990029
  0.14820000   2.34989975
  0.14820000   2.34989924
  0.14820000   2.34989875
  0.14820000   2.34989829
  0.14820000   2.34989785
  0.14820000   2.34989742
  0.14840000   2.35022679
  0.14840000   2.35021962
  0.14840000   2.35022147
  0.14840000   2.35021789
  0.14840000   2.35021791
  0.14840000   2.35021585
  0.14840000   2.35021524
  0.14840000   2.35021387
  0.14840000   2.35021309
  0.14840000   2.35021205
  0.14840000   2.35021128
  0.14840000   2.35021043
  0.14840000   2.35020970
  0.14840000   2.35020898
  0.14840000   2.35020832
  0.14840000   2.35020768
  0.14840000   2.35020709
  0.14840000   2.35020652
  0.14840000   2.35020598
  0.14840000   2.35020547
  0.14840000   2.35020498
  0.14840000   2.35020452
  0.14840000   2.35020407
  0.14840000   2.35020365
  0.14860000   2.35053203
  0.14860000   2.35052382
  0.14860000   2.35052634
  0.14860000   2.35052233
  0.14860000   2.35052263
  0.14860000   2.35052039
  0.14860000   2.35051990
  0.14860000   2.35051844
  0.14860000   2.35051772
  0.14860000   2.35051664
  0.14860000   2.35051589
  0.14860000   2.35051502
  0.14860000   2.35051431
  0.14860000   2.35051358
  0.14860000   2.35051292
  0.14860000   2.35051228
  0.14860000   2.35051169
  0.14860000   2.35051112
  0.14860000   2.35051058
  0.14860000   2.35051007
  0.14860000   2.35050958
  0.14860000   2.35050911
  0.14860000   2.35050867
  0.14860000   2.35050825
  0.14880000   2.35083576
  0.14880000   2.35082634
  0.14880000   2.35082965
  0.14880000   2.35082512
  0.14880000   2.35082576
  0.14880000   2.35082329
  0.14880000   2.35082295
  0.14880000   2.35082140
  0.14880000   2.35082073
  0.14880000   2.35081962
  0.14880000   2.35081889
  0.14880000   2.35081801
  0.14880000   2.35081730
  0.14880000   2.35081656
  0.14880000   2.35081591
  0.14880000   2.35081526
  0.14880000   2.35081467
  0.14880000   2.35081410
  0.14880000   2.35081356
  0.14880000   2.35081305
  0.14880000   2.35081256
  0.14880000   2.35081209
  0.14880000   2.35081165
  0.14880000   2.35081123
  0.14900000   2.35113798
  0.14900000   2.35112718
  0.14900000   2.35113140
  0.14900000   2.35112627
  0.14900000   2.35112730
  0.14900000   2.35112457
  0.14900000   2.35112440
  0.14900000   2.35112274
  0.14900000   2.35112215
  0.14900000   2.35112098
  0.14900000   2.35112028
  0.14900000   2.35111938
  0.14900000   2.35111869
  0.14900000   2.35111794
  0.14900000   2.35111729
  0.14900000   2.35111664
  0.14900000   2.35111605
  0.14900000   2.35111548
  0.14900000   2.35111494
  0.14900000   2.35111442
  0.14900000   2.35111394
  0.14900000   2.35111347
  0.14900000   2.35111303
  0.14900000   2.35111260
  0.14920000   2.35143874
  0.14920000   2.35142634
  0.14920000   2.35143162
  0.14920000   2.35142578
  0.14920000   2.35142728
  0.14920000   2.35142424
  0.14920000   2.35142427
  0.14920000   2.35142247
  0.14920000   2.35142197
  0.14920000   2.35142075
  0.14920000   2.35142009
  0.14920000   2.35141916
  0.14920000   2.35141848
  0.14920000   2.35141772
  0.14920000   2.35141708
  0.14920000   2.35141642
  0.14920000   2.35141584
  0.14920000   2.35141526
  0.14920000   2.35141472
  0.14920000   2.35141421
  0.14920000   2.35141372
  0.14920000   2.35141325
  0.14920000   2.35141281
  0.14920000   2.35141238
  0.14940000   2.35173805
  0.14940000   2.35172381
  0.14940000   2.35173033
  0.14940000   2.35172366
  0.14940000   2.35172571
  0.14940000   2.35172231
  0.14940000   2.35172258
  0.14940000   2.35172061
  0.14940000   2.35172022
  0.14940000   2.35171892
  0.14940000   2.35171831
  0.14940000   2.35171735
  0.14940000   2.35171669
  0.14940000   2.35171591
  0.14940000   2.35171528
  0.14940000   2.35171462
  0.14940000   2.35171404
  0.14940000   2.35171346
  0.14940000   2.35171292
  0.14940000   2.35171240
  0.14940000   2.35171192
  0.14940000   2.35171145
  0.14940000   2.35171101
  0.14940000   2.35171058
  0.14960000   2.35203595
  0.14960000   2.35201960
  0.14960000   2.35202754
  0.14960000   2.35201992
  0.14960000   2.35202260
  0.14960000   2.35201877
  0.14960000   2.35201933
  0.14960000   2.35201717
  0.14960000   2.35201690
  0.14960000   2.35201552
  0.14960000   2.35201497
  0.14960000   2.35201396
  0.14960000   2.35201333
  0.14960000   2.35201254
  0.14960000   2.35201192
  0.14960000   2.35201125
  0.14960000   2.35201067
  0.14960000   2.35201008
  0.14960000   2.35200955
  0.14960000   2.35200903
  0.14960000   2.35200854
  0.14960000   2.35200807
  0.14960000   2.35200763
  0.14960000   2.35200720
  0.14980000   2.35233247
  0.14980000   2.35231371
  0.14980000   2.35232327
  0.14980000   2.35231455
  0.14980000   2.35231798
  0.14980000   2.35231364
  0.14980000   2.35231454
  0.14980000   2.35231215
  0.14980000   2.35231204
  0.14980000   2.35231055
  0.14980000   2.35231007
  0.14980000   2.35230902
  0.14980000   2.35230842
  0.14980000   2.35230760
  0.14980000   2.35230699
  0.14980000   2.35230631
  0.14980000   2.35230574
  0.14980000   2.35230515
  0.14980000   2.35230462
  0.14980000   2.35230409
  0.14980000   2.35230361
  0.14980000   2.35230314
  0.14980000   2.35230270
  0.14980000   2.35230227
  0.15000000   2.35262763
  0.15000000   2.35260612
  0.15000000   2.35261756
  0.15000000   2.35260755
  0.15000000   2.35261186
  0.15000000   2.35260693
  0.15000000   2.35260823
  0.15000000   2.35260557
  0.15000000   2.35260564
  0.15000000   2.35260402
  0.15000000   2.35260362
  0.15000000   2.35260251
  0.15000000   2.35260195
  0.15000000   2.35260111
  0.15000000   2.35260052
  0.15000000   2.35259982
  0.15000000   2.35259926
  0.15000000   2.35259866
  0.15000000   2.35259814
  0.15000000   2.35259761
  0.15000000   2.35259712
  0.15000000   2.35259665
  0.15000000   2.35259621
  0.15000000   2.35259578
  0.15020000   2.35292146
  0.15020000   2.35289684
  0.15020000   2.35291042
  0.15020000   2.35289894
  0.15020000   2.35290426
  0.15020000   2.35289863
  0.15020000   2.35290040
  0.15020000   2.35289742
  0.15020000   2.35289771
  0.15020000   2.35289595
  0.15020000   2.35289564
  0.15020000   2.35289446
  0.15020000   2.35289395
  0.15020000   2.35289307
  0.15020000   2.35289251
  0.15020000   2.35289180
  0.15020000   2.35289124
  0.15020000   2.35289064
  0.15020000   2.35289011
  0.15020000   2.35288958
  0.15020000   2.35288910
  0.15020000   2.35288863
  0.15020000   2.35288818
  0.15020000   2.35288775
  0.15040000   2.35321402
  0.15040000   2.35318585
  0.15040000   2.35320189
  0.15040000   2.35318871
  0.15040000   2.35319519
  0.15040000   2.35318876
  0.15040000   2.35319108
  0.15040000   2.35318772
  0.15040000   2.35318827
  0.15040000   2.35318632
  0.15040000   2.35318615
  0.15040000   2.35318488
  0.15040000   2.35318442
  0.15040000   2.35318351
  0.15040000   2.35318297
  0.15040000   2.35318224
  0.15040000   2.35318169
  0.15040000   2.35318108
  0.15040000   2.35318056
  0.15040000   2.35318003
  0.15040000   2.35317955
  0.15040000   2.35317907
  0.15040000   2.35317863
  0.15040000   2.35317820
  0.15060000   2.35350532
  0.15060000   2.35347314
  0.15060000   2.35349197
  0.15060000   2.35347685
  0.15060000   2.35348468
  0.15060000   2.35347731
  0.15060000   2.35348029
  0.15060000   2.35347647
  0.15060000   2.35347733
  0.15060000   2.35347517
  0.15060000   2.35347514
  0.15060000   2.35347377
  0.15060000   2.35347338
  0.15060000   2.35347242
  0.15060000   2.35347191
  0.15060000   2.35347116
  0.15060000   2.35347063
  0.15060000   2.35347000
  0.15060000   2.35346949
  0.15060000   2.35346895
  0.15060000   2.35346848
  0.15060000   2.35346800
  0.15060000   2.35346756
  0.15060000   2.35346712
  0.15080000   2.35379542
  0.15080000   2.35375871
  0.15080000   2.35378071
  0.15080000   2.35376337
  0.15080000   2.35377275
  0.15080000   2.35376429
  0.15080000   2.35376802
  0.15080000   2.35376368
  0.15080000   2.35376491
  0.15080000   2.35376249
  0.15080000   2.35376264
  0.15080000   2.35376115
  0.15080000   2.35376084
  0.15080000   2.35375982
  0.15080000   2.35375935
  0.15080000   2.35375857
  0.15080000   2.35375806
  0.15080000   2.35375742
  0.15080000   2.35375692
  0.15080000   2.35375637
  0.15080000   2.35375590
  0.15080000   2.35375541
  0.15080000   2.35375497
  0.15080000   2.35375454
  0.15100000   2.35408435
  0.15100000   2.35404253
  0.15100000   2.35406814
  0.15100000   2.35404825
  0.15100000   2.35405942
  0.15100000   2.35404971
  0.15100000   2.35405432
  0.15100000   2.35404936
  0.15100000   2.35405102
  0.15100000   2.35404830
  0.15100000   2.35404865
  0.15100000   2.35404701
  0.15100000   2.35404681
  0.15100000   2.35404571
  0.15100000   2.35404529
  0.15100000   2.35404448
  0.15100000   2.35404399
  0.15100000   2.35404334
  0.15100000   2.35404285
  0.15100000   2.35404229
  0.15100000   2.35404182
  0.15100000   2.35404133
  0.15100000   2.35404090
  0.15100000   2.35404046
  0.15120000   2.35437216
  0.15120000   2.35432459
  0.15120000   2.35435428
  0.15120000   2.35433150
  0.15120000   2.35434472
  0.15120000   2.35433356
  0.15120000   2.35433919
  0.15120000   2.35433350
  0.15120000   2.35433567
  0.15120000   2.35433259
  0.15120000   2.35433319
  0.15120000   2.35433138
  0.15120000   2.35433130
  0.15120000   2.35433012
  0.15120000   2.35432976
  0.15120000   2.35432890
  0.15120000   2.35432844
  0.15120000   2.35432776
  0.15120000   2.35432729
  0.15120000   2.35432672
  0.15120000   2.35432626
  0.15120000   2.35432577
  0.15120000   2.35432533
  0.15120000   2.35432489
  0.15140000   2.35465889
  0.15140000   2.35460487
  0.15140000   2.35463917
  0.15140000   2.35461309
  0.15140000   2.35462866
  0.15140000   2.35461583
  0.15140000   2.35462264
  0.15140000   2.35461612
  0.15140000   2.35461888
  0.15140000   2.35461538
  0.15140000   2.35461628
  0.15140000   2.35461426
  0.15140000   2.35461432
  0.15140000   2.35461303
  0.15140000   2.35461275
  0.15140000   2.35461184
  0.15140000   2.35461141
  0.15140000   2.35461071
  0.15140000   2.35461025
  0.15140000   2.35460967
  0.15140000   2.35460922
  0.15140000   2.35460872
  0.15140000   2.35460829
  0.15140000   2.35460785
  0.15160000   2.35494460
  0.15160000   2.35488334
  0.15160000   2.35492285
  0.15160000   2.35489304
  0.15160000   2.35491128
  0.15160000   2.35489653
  0.15160000   2.35490471
  0.15160000   2.35489721
  0.15160000   2.35490066
  0.15160000   2.35489667
  0.15160000   2.35489792
  0.15160000   2.35489565
  0.15160000   2.35489589
  0.15160000   2.35489448
  0.15160000   2.35489428
  0.15160000   2.35489330
  0.15160000   2.35489292
  0.15160000   2.35489219
  0.15160000   2.35489175
  0.15160000   2.35489116
  0.15160000   2.35489071
  0.15160000   2.35489020
  0.15160000   2.35488978
  0.15160000   2.35488933
  0.15180000   2.35522933
  0.15180000   2.35515999
  0.15180000   2.35520535
  0.15180000   2.35517131
  0.15180000   2.35519260
  0.15180000   2.35517566
  0.15180000   2.35518541
  0.15180000   2.35517678
  0.15180000   2.35518104
  0.15180000   2.35517647
  0.15180000   2.35517813
  0.15180000   2.35517556
  0.15180000   2.35517602
  0.15180000   2.35517445
  0.15180000   2.35517436
  0.15180000   2.35517331
  0.15180000   2.35517298
  0.15180000   2.35517221
  0.15180000   2.35517180
  0.15180000   2.35517118
  0.15180000   2.35517075
  0.15180000   2.35517023
  0.15180000   2.35516981
  0.15180000   2.35516936
  0.15200000   2.35551315
  0.15200000   2.35543479
  0.15200000   2.35548672
  0.15200000   2.35544790
  0.15200000   2.35547265
  0.15200000   2.35545320
  0.15200000   2.35546477
  0.15200000   2.35545482
  0.15200000   2.35546003
  0.15200000   2.35545477
  0.15200000   2.35545693
  0.15200000   2.35545400
  0.15200000   2.35545471
  0.15200000   2.35545296
  0.15200000   2.35545300
  0.15200000   2.35545185
  0.15200000   2.35545160
  0.15200000   2.35545077
  0.15200000   2.35545040
  0.15200000   2.35544976
  0.15200000   2.35544934
  0.15200000   2.35544881
  0.15200000   2.35544840
  0.15200000   2.35544794
  0.15220000   2.35579611
  0.15220000   2.35570770
  0.15220000   2.35576699
  0.15220000   2.35572278
  0.15220000   2.35575147
  0.15220000   2.35572915
  0.15220000   2.35574280
  0.15220000   2.35573134
  0.15220000   2.35573765
  0.15220000   2.35573159
  0.15220000   2.35573433
  0.15220000   2.35573098
  0.15220000   2.35573199
  0.15220000   2.35573002
  0.15220000   2.35573022
  0.15220000   2.35572896
  0.15220000   2.35572878
  0.15220000   2.35572790
  0.15220000   2.35572756
  0.15220000   2.35572689
  0.15220000   2.35572650
  0.15220000   2.35572595
  0.15220000   2.35572555
  0.15220000   2.35572509
  0.15240000   2.35607828
  0.15240000   2.35597868
  0.15240000   2.35604621
  0.15240000   2.35599595
  0.15240000   2.35602908
  0.15240000   2.35600350
  0.15240000   2.35601954
  0.15240000   2.35600633
  0.15240000   2.35601391
  0.15240000   2.35600693
  0.15240000   2.35601034
  0.15240000   2.35600650
  0.15240000   2.35600787
  0.15240000   2.35600564
  0.15240000   2.35600602
  0.15240000   2.35600462
  0.15240000   2.35600454
  0.15240000   2.35600359
  0.15240000   2.35600330
  0.15240000   2.35600260
  0.15240000   2.35600223
  0.15240000   2.35600167
  0.15240000   2.35600128
  0.15240000   2.35600080
  0.15260000   2.35635970
  0.15260000   2.35624772
  0.15260000   2.35632444
  0.15260000   2.35626737
  0.15260000   2.35630553
  0.15260000   2.35627623
  0.15260000   2.35629501
  0.15260000   2.35627979
  0.15260000   2.35628885
  0.15260000   2.35628078
  0.15260000   2.35628498
  0.15260000   2.35628056
  0.15260000   2.35628235
  0.15260000   2.35627981
  0.15260000   2.35628042
  0.15260000   2.35627886
  0.15260000   2.35627890
  0.15260000   2.35627786
  0.15260000   2.35627763
  0.15260000   2.35627688
  0.15260000   2.35627655
  0.15260000   2.35627596
  0.15260000   2.35627559
  0.15260000   2.35627509
  0.15280000   2.35664047
  0.15280000   2.35651475
  0.15280000   2.35660172
  0.15280000   2.35653702
  0.15280000   2.35658085
  0.15280000   2.35654735
  0.15280000   2.35656924
  0.15280000   2.35655171
  0.15280000   2.35656247
  0.15280000   2.35655315
  0.15280000   2.35655827
  0.15280000   2.35655317
  0.15280000   2.35655546
  0.15280000   2.35655255
  0.15280000   2.35655343
  0.15280000   2.35655167
  0.15280000   2.35655185
  0.15280000   2.35655070
  0.15280000   2.35655056
  0.15280000   2.35654975
  0.15280000   2.35654946
  0.15280000   2.35654883
  0.15280000   2.35654849
  0.15280000   2.35654798
  0.15300000   2.35692063
  0.15300000   2.35677975
  0.15300000   2.35687810
  0.15300000   2.35680487
  0.15300000   2.35685508
  0.15300000   2.35681681
  0.15300000   2.35684225
  0.15300000   2.35682209
  0.15300000   2.35683481
  0.15300000   2.35682403
  0.15300000   2.35683023
  0.15300000   2.35682433
  0.15300000   2.35682721
  0.15300000   2.35682386
  0.15300000   2.35682506
  0.15300000   2.35682306
  0.15300000   2.35682342
  0.15300000   2.35682215
  0.15300000   2.35682210
  0.15300000   2.35682121
  0.15300000   2.35682097
  0.15300000   2.35682031
  0.15300000   2.35681999
  0.15300000   2.35681946
  0.15320000   2.35720028
  0.15320000   2.35704266
  0.15320000   2.35715365
  0.15320000   2.35707090
  0.15320000   2.35712826
  0.15320000   2.35708462
  0.15320000   2.35711409
  0.15320000   2.35709091
  0.15320000   2.35710588
  0.15320000   2.35709342
  0.15320000   2.35710087
  0.15320000   2.35709404
  0.15320000   2.35709761
  0.15320000   2.35709375
  0.15320000   2.35709533
  0.15320000   2.35709305
  0.15320000   2.35709362
  0.15320000   2.35709219
  0.15320000   2.35709225
  0.15320000   2.35709128
  0.15320000   2.35709110
  0.15320000   2.35709039
  0.15320000   2.35709011
  0.15320000   2.35708955
  0.15340000   2.35747947
  0.15340000   2.35730344
  0.15340000   2.35742842
  0.15340000   2.35733506
  0.15340000   2.35740045
  0.15340000   2.35735075
  0.15340000   2.35738479
  0.15340000   2.35735816
  0.15340000   2.35737572
  0.15340000   2.35736131
  0.15340000   2.35737022
  0.15340000   2.35736230
  0.15340000   2.35736669
  0.15340000   2.35736222
  0.15340000   2.35736425
  0.15340000   2.35736163
  0.15340000   2.35736245
  0.15340000   2.35736083
  0.15340000   2.35736103
  0.15340000   2.35735996
  0.15340000   2.35735986
  0.15340000   2.35735909
  0.15340000   2.35735885
  0.15340000   2.35735826
  0.15360000   2.35775830
  0.15360000   2.35756204
  0.15360000   2.35770248
  0.15360000   2.35759732
  0.15360000   2.35767169
  0.15360000   2.35761517
  0.15360000   2.35765438
  0.15360000   2.35762384
  0.15360000   2.35764435
  0.15360000   2.35762771
  0.15360000   2.35763831
  0.15360000   2.35762911
  0.15360000   2.35763445
  0.15360000   2.35762927
  0.15360000   2.35763184
  0.15360000   2.35762881
  0.15360000   2.35762993
  0.15360000   2.35762808
  0.15360000   2.35762846
  0.15360000   2.35762726
  0.15360000   2.35762725
  0.15360000   2.35762641
  0.15360000   2.35762622
  0.15360000   2.35762559
  0.15380000   2.35803683
  0.15380000   2.35781839
  0.15380000   2.35797589
  0.15380000   2.35785765
  0.15380000   2.35794203
  0.15380000   2.35787786
  0.15380000   2.35792290
  0.15380000   2.35788792
  0.15380000   2.35791181
  0.15380000   2.35789260
  0.15380000   2.35790514
  0.15380000   2.35789447
  0.15380000   2.35790093
  0.15380000   2.35789490
  0.15380000   2.35789810
  0.15380000   2.35789460
  0.15380000   2.35789608
  0.15380000   2.35789396
  0.15380000   2.35789454
  0.15380000   2.35789318
  0.15380000   2.35789329
  0.15380000   2.35789236
  0.15380000   2.35789224
  0.15380000   2.35789156
  0.15400000   2.35831515
  0.15400000   2.35807245
  0.15400000   2.35824871
  0.15400000   2.35811599
  0.15400000   2.35821152
  0.15400000   2.35813878
  0.15400000   2.35819039
  0.15400000   2.35815038
  0.15400000   2.35817812
  0.15400000   2.35815597
  0.15400000   2.35817075
  0.15400000   2.35815838
  0.15400000   2.35816613
  0.15400000   2.35815911
  0.15400000   2.35816307
  0.15400000   2.35815899
  0.15400000   2.35816090
  0.15400000   2.35815845
  0.15400000   2.35815928
  0.15400000   2.35815774
  0.15400000   2.35815798
  0.15400000   2.35815695
  0.15400000   2.35815691
  0.15400000   2.35815617
  0.15420000   2.35859334
  0.15420000   2.35832415
  0.15420000   2.35852102
  0.15420000   2.35837231
  0.15420000   2.35848022
  0.15420000   2.35839791
  0.15420000   2.35845691
  0.15420000   2.35841120
  0.15420000   2.35844332
  0.15420000   2.35841781
  0.15420000   2.35843517
  0.15420000   2.35842082
  0.15420000   2.35843008
  0.15420000   2.35842191
  0.15420000   2.35842674
  0.15420000   2.35842199
  0.15420000   2.35842442
  0.15420000   2.35842158
  0.15420000   2.35842270
  0.15420000   2.35842093
  0.15420000   2.35842135
  0.15420000   2.35842019
  0.15420000   2.35842024
  0.15420000   2.35841943
  0.15440000   2.35887149
  0.15440000   2.35857344
  0.15440000   2.35879289
  0.15440000   2.35862655
  0.15440000   2.35874820
  0.15440000   2.35865521
  0.15440000   2.35872249
  0.15440000   2.35867037
  0.15440000   2.35870744
  0.15440000   2.35867811
  0.15440000   2.35869841
  0.15440000   2.35868179
  0.15440000   2.35869280
  0.15440000   2.35868328
  0.15440000   2.35868915
  0.15440000   2.35868361
  0.15440000   2.35868664
  0.15440000   2.35868334
  0.15440000   2.35868481
  0.15440000   2.35868277
  0.15440000   2.35868340
  0.15440000   2.35868207
  0.15440000   2.35868225
  0.15440000   2.35868134
  0.15460000   2.35914966
  0.15460000   2.35882025
  0.15460000   2.35906440
  0.15460000   2.35887867
  0.15460000   2.35901550
  0.15460000   2.35891064
  0.15460000   2.35898718
  0.15460000   2.35892785
  0.15460000   2.35897054
  0.15460000   2.35893684
  0.15460000   2.35896053
  0.15460000   2.35894128
  0.15460000   2.35895432
  0.15460000   2.35894323
  0.15460000   2.35895031
  0.15460000   2.35894383
  0.15460000   2.35894758
  0.15460000   2.35894373
  0.15460000   2.35894563
  0.15460000   2.35894326
  0.15460000   2.35894413
  0.15460000   2.35894262
  0.15460000   2.35894294
  0.15460000   2.35894192
  0.15480000   2.35942795
  0.15480000   2.35906453
  0.15480000   2.35933561
  0.15480000   2.35912862
  0.15480000   2.35928220
  0.15480000   2.35916417
  0.15480000   2.35925105
  0.15480000   2.35918361
  0.15480000   2.35923263
  0.15480000   2.35919399
  0.15480000   2.35922153
  0.15480000   2.35919928
  0.15480000   2.35921466
  0.15480000   2.35920175
  0.15480000   2.35921024
  0.15480000   2.35920267
  0.15480000   2.35920727
  0.15480000   2.35920275
  0.15480000   2.35920516
  0.15480000   2.35920240
  0.15480000   2.35920358
  0.15480000   2.35920183
  0.15480000   2.35920233
  0.15480000   2.35920117
  0.15500000   2.35970642
  0.15500000   2.35930621
  0.15500000   2.35960660
  0.15500000   2.35937633
  0.15500000   2.35954836
  0.15500000   2.35941574
  0.15500000   2.35951414
  0.15500000   2.35943763
  0.15500000   2.35949378
  0.15500000   2.35944953
  0.15500000   2.35948147
  0.15500000   2.35945578
  0.15500000   2.35947384
  0.15500000   2.35945884
  0.15500000   2.35946896
  0.15500000   2.35946012
  0.15500000   2.35946571
  0.15500000   2.35946042
  0.15500000   2.35946343
  0.15500000   2.35946020
  0.15500000   2.35946174
  0.15500000   2.35945971
  0.15500000   2.35946043
  0.15500000   2.35945910
  0.15520000   2.35998515
  0.15520000   2.35954525
  0.15520000   2.35987744
  0.15520000   2.35962176
  0.15520000   2.35981405
  0.15520000   2.35966532
  0.15520000   2.35977650
  0.15520000   2.35968986
  0.15520000   2.35975402
  0.15520000   2.35970345
  0.15520000   2.35974038
  0.15520000   2.35971076
  0.15520000   2.35973191
  0.15520000   2.35971447
  0.15520000   2.35972651
  0.15520000   2.35971616
  0.15520000   2.35972292
  0.15520000   2.35971672
  0.15520000   2.35972044
  0.15520000   2.35971665
  0.15520000   2.35971863
  0.15520000   2.35971626
  0.15520000   2.35971724
  0.15520000   2.35971571
  0.15540000   2.36026420
  0.15540000   2.35978158
  0.15540000   2.36014820
  0.15540000   2.35986486
  0.15540000   2.36007933
  0.15540000   2.35991286
  0.15540000   2.36003820
  0.15540000   2.35994028
  0.15540000   2.36001341
  0.15540000   2.35995572
  0.15540000   2.35999829
  0.15540000   2.35996419
  0.15540000   2.35998888
  0.15540000   2.35996866
  0.15540000   2.35998289
  0.15540000   2.35997081
  0.15540000   2.35997894
  0.15540000   2.35997166
  0.15540000   2.35997623
  0.15540000   2.35997177
  0.15540000   2.35997427
  0.15540000   2.35997149
  0.15540000   2.35997279
  0.15540000   2.35997100
  0.15560000   2.36054363
  0.15560000   2.36001516
  0.15560000   2.36041896
  0.15560000   2.36010558
  0.15560000   2.36034427
  0.15560000   2.36015831
  0.15560000   2.36029929
  0.15560000   2.36018884
  0.15560000   2.36027200
  0.15560000   2.36020630
  0.15560000   2.36025525
  0.15560000   2.36021607
  0.15560000   2.36024480
  0.15560000   2.36022136
  0.15560000   2.36023815
  0.15560000   2.36022405
  0.15560000   2.36023377
  0.15560000   2.36022523
  0.15560000   2.36023079
  0.15560000   2.36022555
  0.15560000   2.36022867
  0.15560000   2.36022540
  0.15560000   2.36022709
  0.15560000   2.36022499
  0.15580000   2.36082348
  0.15580000   2.36024595
  0.15580000   2.36068977
  0.15580000   2.36034385
  0.15580000   2.36060893
  0.15580000   2.36040163
  0.15580000   2.36055984
  0.15580000   2.36043551
  0.15580000   2.36052983
  0.15580000   2.36045516
  0.15580000   2.36051130
  0.15580000   2.36046637
  0.15580000   2.36049970
  0.15580000   2.36047259
  0.15580000   2.36049230
  0.15580000   2.36047587
  0.15580000   2.36048745
  0.15580000   2.36047742
  0.15580000   2.36048416
  0.15580000   2.36047799
  0.15580000   2.36048185
  0.15580000   2.36047799
  0.15580000   2.36048014
  0.15580000   2.36047768
  0.15600000   2.36110379
  0.15600000   2.36047392
  0.15600000   2.36096068
  0.15600000   2.36057965
  0.15600000   2.36087338
  0.15600000   2.36064277
  0.15600000   2.36081990
  0.15600000   2.36068024
  0.15600000   2.36078696
  0.15600000   2.36070228
  0.15600000   2.36076649
  0.15600000   2.36071506
  0.15600000   2.36075361
  0.15600000   2.36072231
  0.15600000   2.36074538
  0.15600000   2.36072625
  0.15600000   2.36073999
  0.15600000   2.36072824
  0.15600000   2.36073636
  0.15600000   2.36072908
  0.15600000   2.36073382
  0.15600000   2.36072926
  0.15600000   2.36073197
  0.15600000   2.36072907
  0.15620000   2.36138456
  0.15620000   2.36069905
  0.15620000   2.36123175
  0.15620000   2.36081294
  0.15620000   2.36113767
  0.15620000   2.36088169
  0.15620000   2.36107954
  0.15620000   2.36092299
  0.15620000   2.36104344
  0.15620000   2.36094762
  0.15620000   2.36102086
  0.15620000   2.36096213
  0.15620000   2.36100658
  0.15620000   2.36097051
  0.15620000   2.36099742
  0.15620000   2.36097520
  0.15620000   2.36099143
  0.15620000   2.36097767
  0.15620000   2.36098740
  0.15620000   2.36097883
  0.15620000   2.36098460
  0.15620000   2.36097922
  0.15620000   2.36098259
  0.15620000   2.36097915
  0.15640000   2.36166580
  0.15640000   2.36092134
  0.15640000   2.36150301
  0.15640000   2.36104368
  0.15640000   2.36140185
  0.15640000   2.36111835
  0.15640000   2.36133880
  0.15640000   2.36116374
  0.15640000   2.36129933
  0.15640000   2.36119114
  0.15640000   2.36127446
  0.15640000   2.36120752
  0.15640000   2.36125865
  0.15640000   2.36121716
  0.15640000   2.36124846
  0.15640000   2.36122269
  0.15640000   2.36124178
  0.15640000   2.36122571
  0.15640000   2.36123731
  0.15640000   2.36122723
  0.15640000   2.36123422
  0.15640000   2.36122785
  0.15640000   2.36123201
  0.15640000   2.36122794
  0.15660000   2.36194748
  0.15660000   2.36114080
  0.15660000   2.36177447
  0.15660000   2.36127185
  0.15660000   2.36166597
  0.15660000   2.36135272
  0.15660000   2.36159775
  0.15660000   2.36140243
  0.15660000   2.36155468
  0.15660000   2.36143282
  0.15660000   2.36152734
  0.15660000   2.36145123
  0.15660000   2.36150985
  0.15660000   2.36146225
  0.15660000   2.36149853
  0.15660000   2.36146870
  0.15660000   2.36149109
  0.15660000   2.36147234
  0.15660000   2.36148611
  0.15660000   2.36147428
  0.15660000   2.36148269
  0.15660000   2.36147517
  0.15660000   2.36148026
  0.15660000   2.36147543
  0.15680000   2.36222953
  0.15680000   2.36135748
  0.15680000   2.36204614
  0.15680000   2.36149747
  0.15680000   2.36193006
  0.15680000   2.36158476
  0.15680000   2.36185642
  0.15680000   2.36163903
  0.15680000   2.36180954
  0.15680000   2.36167261
  0.15680000   2.36177955
  0.15680000   2.36169322
  0.15680000   2.36176023
  0.15680000   2.36170575
  0.15680000   2.36174767
  0.15680000   2.36171322
  0.15680000   2.36173939
  0.15680000   2.36171756
  0.15680000   2.36173384
  0.15680000   2.36171995
  0.15680000   2.36173003
  0.15680000   2.36172115
  0.15680000   2.36172735
  0.15680000   2.36172163
  0.15700000   2.36251188
  0.15700000   2.36157144
  0.15700000   2.36231800
  0.15700000   2.36172053
  0.15700000   2.36219414
  0.15700000   2.36181448
  0.15700000   2.36211486
  0.15700000   2.36187353
  0.15700000   2.36206396
  0.15700000   2.36191048
  0.15700000   2.36203113
  0.15700000   2.36193347
  0.15700000   2.36200984
  0.15700000   2.36194763
  0.15700000   2.36199591
  0.15700000   2.36195623
  0.15700000   2.36198670
  0.15700000   2.36196133
  0.15700000   2.36198051
  0.15700000   2.36196425
  0.15700000   2.36197627
  0.15700000   2.36196580
  0.15700000   2.36197330
  0.15700000   2.36196652
  0.15720000   2.36279439
  0.15720000   2.36178279
  0.15720000   2.36258999
  0.15720000   2.36194107
  0.15720000   2.36245821
  0.15720000   2.36204187
  0.15720000   2.36237308
  0.15720000   2.36210590
  0.15720000   2.36231796
  0.15720000   2.36214642
  0.15720000   2.36228213
  0.15720000   2.36217193
  0.15720000   2.36225871
  0.15720000   2.36218787
  0.15720000   2.36224330
  0.15720000   2.36219771
  0.15720000   2.36223306
  0.15720000   2.36220366
  0.15720000   2.36222617
  0.15720000   2.36220716
  0.15720000   2.36222144
  0.15720000   2.36220912
  0.15720000   2.36221813
  0.15720000   2.36221010
  0.15740000   2.36307688
  0.15740000   2.36199165
  0.15740000   2.36286204
  0.15740000   2.36215917
  0.15740000   2.36272223
  0.15740000   2.36226695
  0.15740000   2.36263111
  0.15740000   2.36233613
  0.15740000   2.36257159
  0.15740000   2.36238040
  0.15740000   2.36253257
  0.15740000   2.36240860
  0.15740000   2.36250689
  0.15740000   2.36242645
  0.15740000   2.36248988
  0.15740000   2.36243763
  0.15740000   2.36247851
  0.15740000   2.36244452
  0.15740000   2.36247083
  0.15740000   2.36244868
  0.15740000   2.36246556
  0.15740000   2.36245108
  0.15740000   2.36246187
  0.15740000   2.36245238
  0.15760000   2.36335913
  0.15760000   2.36219822
  0.15760000   2.36313402
  0.15760000   2.36237492
  0.15760000   2.36298617
  0.15760000   2.36248975
  0.15760000   2.36288893
  0.15760000   2.36256423
  0.15760000   2.36282485
  0.15760000   2.36261241
  0.15760000   2.36278250
  0.15760000   2.36264346
  0.15760000   2.36275441
  0.15760000   2.36266334
  0.15760000   2.36273567
  0.15760000   2.36267598
  0.15760000   2.36272307
  0.15760000   2.36268390
  0.15760000   2.36271452
  0.15760000   2.36268878
  0.15760000   2.36270865
  0.15760000   2.36269169
  0.15760000   2.36270454
  0.15760000   2.36269333
  0.15780000   2.36364086
  0.15780000   2.36240273
  0.15780000   2.36340576
  0.15780000   2.36258846
  0.15780000   2.36324993
  0.15780000   2.36271036
  0.15780000   2.36314651
  0.15780000   2.36279024
  0.15780000   2.36307776
  0.15780000   2.36284246
  0.15780000   2.36303194
  0.15780000   2.36287648
  0.15780000   2.36300130
  0.15780000   2.36289854
  0.15780000   2.36298071
  0.15780000   2.36291274
  0.15780000   2.36296679
  0.15780000   2.36292178
  0.15780000   2.36295729
  0.15780000   2.36292746
  0.15780000   2.36295075
  0.15780000   2.36293093
  0.15780000   2.36294617
  0.15780000   2.36293297
  0.15800000   2.36392170
  0.15800000   2.36260548
  0.15800000   2.36367706
  0.15800000   2.36279996
  0.15800000   2.36351340
  0.15800000   2.36292886
  0.15800000   2.36340380
  0.15800000   2.36301419
  0.15800000   2.36333029
  0.15800000   2.36307055
  0.15800000   2.36328089
  0.15800000   2.36310768
  0.15800000   2.36324758
  0.15800000   2.36313202
  0.15800000   2.36322503
  0.15800000   2.36314789
  0.15800000   2.36320968
  0.15800000   2.36315815
  0.15800000   2.36319916
  0.15800000   2.36316470
  0.15800000   2.36319187
  0.15800000   2.36316879
  0.15800000   2.36318676
  0.15800000   2.36317127
  0.15820000   2.36420122
  0.15820000   2.36280684
  0.15820000   2.36394762
  0.15820000   2.36300966
  0.15820000   2.36377640
  0.15820000   2.36314542
  0.15820000   2.36366070
  0.15820000   2.36323618
  0.15820000   2.36358241
  0.15820000   2.36329675
  0.15820000   2.36352934
  0.15820000   2.36333706
  0.15820000   2.36349326
  0.15820000   2.36336380
  0.15820000   2.36346865
  0.15820000   2.36338144
  0.15820000   2.36345178
  0.15820000   2.36339300
  0.15820000   2.36344015
  0.15820000   2.36340048
  0.15820000   2.36343205
  0.15820000   2.36340526
  0.15820000   2.36342637
  0.15820000   2.36340823
  0.15840000   2.36447890
  0.15840000   2.36300726
  0.15840000   2.36421709
  0.15840000   2.36321787
  0.15840000   2.36403870
  0.15840000   2.36336021
  0.15840000   2.36391707
  0.15840000   2.36345631
  0.15840000   2.36383403
  0.15840000   2.36352109
  0.15840000   2.36377725
  0.15840000   2.36356466
  0.15840000   2.36373833
  0.15840000   2.36359387
  0.15840000   2.36371158
  0.15840000   2.36361337
  0.15840000   2.36369310
  0.15840000   2.36362631
  0.15840000   2.36368028
  0.15840000   2.36363481
  0.15840000   2.36367132
  0.15840000   2.36364033
  0.15840000   2.36366499
  0.15840000   2.36364385
  0.15860000   2.36475412
  0.15860000   2.36320728
  0.15860000   2.36448503
  0.15860000   2.36342495
  0.15860000   2.36430002
  0.15860000   2.36357349
  0.15860000   2.36417273
  0.15860000   2.36367476
  0.15860000   2.36408505
  0.15860000   2.36374370
  0.15860000   2.36402458
  0.15860000   2.36379054
  0.15860000   2.36398278
  0.15860000   2.36382228
  0.15860000   2.36395381
  0.15860000   2.36384370
  0.15860000   2.36393366
  0.15860000   2.36385809
  0.15860000   2.36391958
  0.15860000   2.36386768
  0.15860000   2.36390968
  0.15860000   2.36387401
  0.15860000   2.36390266
  0.15860000   2.36387811
  0.15880000   2.36502612
  0.15880000   2.36340754
  0.15880000   2.36475092
  0.15880000   2.36363138
  0.15880000   2.36455998
  0.15880000   2.36378559
  0.15880000   2.36442742
  0.15880000   2.36389173
  0.15880000   2.36433530
  0.15880000   2.36396470
  0.15880000   2.36427121
  0.15880000   2.36401477
  0.15880000   2.36422653
  0.15880000   2.36404906
  0.15880000   2.36419532
  0.15880000   2.36407246
  0.15880000   2.36417344
  0.15880000   2.36408836
  0.15880000   2.36415805
  0.15880000   2.36409909
  0.15880000   2.36414715
  0.15880000   2.36410628
  0.15880000   2.36413939
  0.15880000   2.36411102
  0.15900000   2.36529406
  0.15900000   2.36360881
  0.15900000   2.36501412
  0.15900000   2.36383771
  0.15900000   2.36481812
  0.15900000   2.36399689
  0.15900000   2.36468083
  0.15900000   2.36410750
  0.15900000   2.36458458
  0.15900000   2.36418429
  0.15900000   2.36451701
  0.15900000   2.36423750
  0.15900000   2.36446952
  0.15900000   2.36427431
  0.15900000   2.36443607
  0.15900000   2.36429970
  0.15900000   2.36441243
  0.15900000   2.36431714
  0.15900000   2.36439568
  0.15900000   2.36432906
  0.15900000   2.36438375
  0.15900000   2.36433715
  0.15900000   2.36437520
  0.15900000   2.36434257
  0.15920000   2.36555693
  0.15920000   2.36381199
  0.15920000   2.36527386
  0.15920000   2.36404461
  0.15920000   2.36507389
  0.15920000   2.36420790
  0.15920000   2.36493255
  0.15920000   2.36432244
  0.15920000   2.36483258
  0.15920000   2.36440271
  0.15920000   2.36476180
  0.15920000   2.36445889
  0.15920000   2.36471161
  0.15920000   2.36449813
  0.15920000   2.36467596
  0.15920000   2.36452548
  0.15920000   2.36465058
  0.15920000   2.36454448
  0.15920000   2.36463245
  0.15920000   2.36455761
  0.15920000   2.36461945
  0.15920000   2.36456664
  0.15920000   2.36461008
  0.15920000   2.36457278
  0.15940000   2.36581355
  0.15940000   2.36401812
  0.15940000   2.36552925
  0.15940000   2.36425289
  0.15940000   2.36532660
  0.15940000   2.36441922
  0.15940000   2.36518208
  0.15940000   2.36453698
  0.15940000   2.36507895
  0.15940000   2.36462030
  0.15940000   2.36500530
  0.15940000   2.36467917
  0.15940000   2.36495262
  0.15940000   2.36472070
  0.15940000   2.36491489
  0.15940000   2.36474993
  0.15940000   2.36488781
  0.15940000   2.36477045
  0.15940000   2.36486832
  0.15940000   2.36478480
  0.15940000   2.36485424
  0.15940000   2.36479478
  0.15940000   2.36484402
  0.15940000   2.36480167
  0.15960000   2.36606260
  0.15960000   2.36422842
  0.15960000   2.36577923
  0.15960000   2.36446349
  0.15960000   2.36557543
  0.15960000   2.36463157
  0.15960000   2.36542880
  0.15960000   2.36475169
  0.15960000   2.36532323
  0.15960000   2.36483746
  0.15960000   2.36524718
  0.15960000   2.36489864
  0.15960000   2.36519232
  0.15960000   2.36494222
  0.15960000   2.36515269
  0.15960000   2.36497320
  0.15960000   2.36512401
  0.15960000   2.36499517
  0.15960000   2.36510320
  0.15960000   2.36501070
  0.15960000   2.36508806
  0.15960000   2.36502162
  0.15960000   2.36507700
  0.15960000   2.36502926
  0.15980000   2.36630253
  0.15980000   2.36444429
  0.15980000   2.36602257
  0.15980000   2.36467754
  0.15980000   2.36581942
  0.15980000   2.36484584
  0.15980000   2.36567195
  0.15980000   2.36496722
  0.15980000   2.36556485
  0.15980000   2.36505470
  0.15980000   2.36548700
  0.15980000   2.36511769
  0.15980000   2.36543037
  0.15980000   2.36516298
  0.15980000   2.36538911
  0.15980000   2.36519550
  0.15980000   2.36535900
  0.15980000   2.36521878
  0.15980000   2.36533699
  0.15980000   2.36523541
  0.15980000   2.36532084
  0.15980000   2.36524724
  0.15980000   2.36530897
  0.15980000   2.36525562
  0.16000000   2.36653161
  0.16000000   2.36466733
  0.16000000   2.36625784
  0.16000000   2.36489632
  0.16000000   2.36605741
  0.16000000   2.36506306
  0.16000000   2.36591063
  0.16000000   2.36518441
  0.16000000   2.36580309
  0.16000000   2.36527267
  0.16000000   2.36572423
  0.16000000   2.36533681
  0.16000000   2.36566637
  0.16000000   2.36538336
  0.16000000   2.36562386
  0.16000000   2.36541710
  0.16000000   2.36559257
  0.16000000   2.36544150
  0.16000000   2.36556951
  0.16000000   2.36545911
  0.16000000   2.36555247
  0.16000000   2.36547176
  0.16000000   2.36553983
  0.16000000   2.36548082
  0.16020000   2.36674786
  0.16020000   2.36489937
  0.16020000   2.36648339
  0.16020000   2.36512136
  0.16020000   2.36628806
  0.16020000   2.36528446
  0.16020000   2.36614375
  0.16020000   2.36540424
  0.16020000   2.36603708
  0.16020000   2.36549214
  0.16020000   2.36595819
  0.16020000   2.36555661
  0.16020000   2.36589979
  0.16020000   2.36560384
  0.16020000   2.36585652
  0.16020000   2.36563838
  0.16020000   2.36582441
  0.16020000   2.36566361
  0.16020000   2.36580054
  0.16020000   2.36568199
  0.16020000   2.36578276
  0.16020000   2.36569534
  0.16020000   2.36576948
  0.16020000   2.36570499
  0.16040000   2.36694906
  0.16040000   2.36514249
  0.16040000   2.36669735
  0.16040000   2.36535439
  0.16040000   2.36650980
  0.16040000   2.36551147
  0.16040000   2.36637003
  0.16040000   2.36562787
  0.16040000   2.36626580
  0.16040000   2.36571407
  0.16040000   2.36618804
  0.16040000   2.36577785
  0.16040000   2.36612998
  0.16040000   2.36582500
  0.16040000   2.36608658
  0.16040000   2.36585981
  0.16040000   2.36605411
  0.16040000   2.36588546
  0.16040000   2.36602977
  0.16040000   2.36590434
  0.16040000   2.36601148
  0.16040000   2.36591818
  0.16040000   2.36599772
  0.16040000   2.36592829
  0.16060000   2.36713268
  0.16060000   2.36539903
  0.16060000   2.36689755
  0.16060000   2.36559742
  0.16060000   2.36672082
  0.16060000   2.36574580
  0.16060000   2.36658794
  0.16060000   2.36585671
  0.16060000   2.36648799
  0.16060000   2.36593958
  0.16060000   2.36641277
  0.16060000   2.36600146
  0.16060000   2.36635611
  0.16060000   2.36604760
  0.16060000   2.36631339
  0.16060000   2.36608198
  0.16060000   2.36628115
  0.16060000   2.36610755
  0.16060000   2.36625678
  0.16060000   2.36612653
  0.16060000   2.36623833
  0.16060000   2.36614058
  0.16060000   2.36622432
  0.16060000   2.36615096
  0.16080000   2.36729595
  0.16080000   2.36567163
  0.16080000   2.36708156
  0.16080000   2.36585273
  0.16080000   2.36691901
  0.16080000   2.36598937
  0.16080000   2.36679572
  0.16080000   2.36609240
  0.16080000   2.36670217
  0.16080000   2.36617006
  0.16080000   2.36663114
  0.16080000   2.36622855
  0.16080000   2.36657718
  0.16080000   2.36627256
  0.16080000   2.36653613
  0.16080000   2.36630563
  0.16080000   2.36650489
  0.16080000   2.36633045
  0.16080000   2.36648107
  0.16080000   2.36634904
  0.16080000   2.36646287
  0.16080000   2.36636294
  0.16080000   2.36644895
  0.16080000   2.36637329
  0.16100000   2.36743572
  0.16100000   2.36596324
  0.16100000   2.36724661
  0.16100000   2.36612292
  0.16100000   2.36710197
  0.16100000   2.36624444
  0.16100000   2.36699130
  0.16100000   2.36633687
  0.16100000   2.36690658
  0.16100000   2.36640714
  0.16100000   2.36684169
  0.16100000   2.36646051
  0.16100000   2.36679195
  0.16100000   2.36650101
  0.16100000   2.36675379
  0.16100000   2.36653172
  0.16100000   2.36672448
  0.16100000   2.36655496
  0.16100000   2.36670193
  0.16100000   2.36657251
  0.16100000   2.36668457
  0.16100000   2.36658575
  0.16100000   2.36667116
  0.16100000   2.36659569
  0.16120000   2.36754855
  0.16120000   2.36627715
  0.16120000   2.36738959
  0.16120000   2.36641092
  0.16120000   2.36726694
  0.16120000   2.36651359
  0.16120000   2.36717227
  0.16120000   2.36659234
  0.16120000   2.36709915
  0.16120000   2.36665272
  0.16120000   2.36704265
  0.16120000   2.36669896
  0.16120000   2.36699894
  0.16120000   2.36673434
  0.16120000   2.36696511
  0.16120000   2.36676138
  0.16120000   2.36693889
  0.16120000   2.36678201
  0.16120000   2.36691853
  0.16120000   2.36679773
  0.16120000   2.36690271
  0.16120000   2.36680966
  0.16120000   2.36689038
  0.16120000   2.36681871
  0.16140000   2.36763062
  0.16140000   2.36661701
  0.16140000   2.36750703
  0.16140000   2.36672004
  0.16140000   2.36741082
  0.16140000   2.36679977
  0.16140000   2.36733588
  0.16140000   2.36686143
  0.16140000   2.36727748
  0.16140000   2.36690907
  0.16140000   2.36723193
  0.16140000   2.36694585
  0.16140000   2.36719636
  0.16140000   2.36697420
  0.16140000   2.36716857
  0.16140000   2.36699603
  0.16140000   2.36714682
  0.16140000   2.36701281
  0.16140000   2.36712978
  0.16140000   2.36702568
  0.16140000   2.36711640
  0.16140000   2.36703552
  0.16140000   2.36710587
  0.16140000   2.36704302
  0.16160000   2.36767771
  0.16160000   2.36698683
  0.16160000   2.36759502
  0.16160000   2.36705397
  0.16160000   2.36753005
  0.16160000   2.36710633
  0.16160000   2.36747896
  0.16160000   2.36714711
  0.16160000   2.36743875
  0.16160000   2.36717883
  0.16160000   2.36740707
  0.16160000   2.36720348
  0.16160000   2.36738208
  0.16160000   2.36722260
  0.16160000   2.36736234
  0.16160000   2.36723739
  0.16160000   2.36734672
  0.16160000   2.36724882
  0.16160000   2.36733434
  0.16160000   2.36725762
  0.16160000   2.36732450
  0.16160000   2.36726437
  0.16160000   2.36731666
  0.16160000   2.36726952
  0.16180000   2.36768525
  0.16180000   2.36739101
  0.16180000   2.36764928
  0.16180000   2.36741684
  0.16180000   2.36762068
  0.16180000   2.36743704
  0.16180000   2.36759791
  0.16180000   2.36745280
  0.16180000   2.36757973
  0.16180000   2.36746506
  0.16180000   2.36756520
  0.16180000   2.36747457
  0.16180000   2.36755355
  0.16180000   2.36748190
  0.16180000   2.36754419
  0.16180000   2.36748754
  0.16180000   2.36753665
  0.16180000   2.36749184
  0.16180000   2.36753054
  0.16180000   2.36749510
  0.16180000   2.36752559
  0.16180000   2.36749754
  0.16180000   2.36752155
  0.16180000   2.36749934
  0.16200000   2.36764822
  0.16200000   2.36783435
  0.16200000   2.36766503
  0.16200000   2.36781318
  0.16200000   2.36767825
  0.16200000   2.36779615
  0.16200000   2.36768861
  0.16200000   2.36778241
  0.16200000   2.36769669
  0.16200000   2.36777130
  0.16200000   2.36770295
  0.16200000   2.36776229
  0.16200000   2.36770778
  0.16200000   2.36775495
  0.16200000   2.36771148
  0.16200000   2.36774897
  0.16200000   2.36771427
  0.16200000   2.36774406
  0.16200000   2.36771637
  0.16200000   2.36774002
  0.16200000   2.36771790
  0.16200000   2.36773668
  0.16200000   2.36771901
  0.16200000   2.36773390
  0.16220000   2.36756119
  0.16220000   2.36832206
  0.16220000   2.36763704
  0.16220000   2.36824802
  0.16220000   2.36769781
  0.16220000   2.36818840
  0.16220000   2.36774645
  0.16220000   2.36814035
  0.16220000   2.36778535
  0.16220000   2.36810160
  0.16220000   2.36781644
  0.16220000   2.36807033
  0.16220000   2.36784126
  0.16220000   2.36804508
  0.16220000   2.36786105
  0.16220000   2.36802465
  0.16220000   2.36787680
  0.16220000   2.36800812
  0.16220000   2.36788933
  0.16220000   2.36799472
  0.16220000   2.36789927
  0.16220000   2.36798384
  0.16220000   2.36790713
  0.16220000   2.36797499
  0.16240000   2.36741835
  0.16240000   2.36885972
  0.16240000   2.36755961
  0.16240000   2.36872683
  0.16240000   2.36767386
  0.16240000   2.36861904
  0.16240000   2.36776623
  0.16240000   2.36853158
  0.16240000   2.36784088
  0.16240000   2.36846060
  0.16240000   2.36790119
  0.16240000   2.36840297
  0.16240000   2.36794988
  0.16240000   2.36835616
  0.16240000   2.36798918
  0.16240000   2.36831812
  0.16240000   2.36802088
  0.16240000   2.36828719
  0.16240000   2.36804643
  0.16240000   2.36826203
  0.16240000   2.36806701
  0.16240000   2.36824154
  0.16240000   2.36808357
  0.16240000   2.36822484
  0.16260000   2.36721342
  0.16260000   2.36945332
  0.16260000   2.36742652
  0.16260000   2.36925555
  0.16260000   2.36760036
  0.16260000   2.36909387
  0.16260000   2.36774215
  0.16260000   2.36896166
  0.16260000   2.36785778
  0.16260000   2.36885354
  0.16260000   2.36795205
  0.16260000   2.36876510
  0.16260000   2.36802890
  0.16260000   2.36869274
  0.16260000   2.36809152
  0.16260000   2.36863353
  0.16260000   2.36814253
  0.16260000   2.36858506
  0.16260000   2.36818407
  0.16260000   2.36854537
  0.16260000   2.36821789
  0.16260000   2.36851285
  0.16260000   2.36824540
  0.16260000   2.36848620
  0.16280000   2.36693978
  0.16280000   2.37010918
  0.16280000   2.36723108
  0.16280000   2.36984060
  0.16280000   2.36747069
  0.16280000   2.36961923
  0.16280000   2.36766778
  0.16280000   2.36943675
  0.16280000   2.36782988
  0.16280000   2.36928633
  0.16280000   2.36796320
  0.16280000   2.36916232
  0.16280000   2.36807283
  0.16280000   2.36906007
  0.16280000   2.36816296
  0.16280000   2.36897575
  0.16280000   2.36823705
  0.16280000   2.36890621
  0.16280000   2.36829794
  0.16280000   2.36884885
  0.16280000   2.36834798
  0.16280000   2.36880151
  0.16280000   2.36838908
  0.16280000   2.36876244
  0.16300000   2.36659040
  0.16300000   2.37083394
  0.16300000   2.36696609
  0.16300000   2.37048882
  0.16300000   2.36727763
  0.16300000   2.37020202
  0.16300000   2.36753601
  0.16300000   2.36996367
  0.16300000   2.36775029
  0.16300000   2.36976559
  0.16300000   2.36792801
  0.16300000   2.36960097
  0.16300000   2.36807538
  0.16300000   2.36946415
  0.16300000   2.36819759
  0.16300000   2.36935044
  0.16300000   2.36829892
  0.16300000   2.36925592
  0.16300000   2.36838293
  0.16300000   2.36917734
  0.16300000   2.36845257
  0.16300000   2.36911201
  0.16300000   2.36851030
  0.16300000   2.36905768
  0.16320000   2.36615795
  0.16320000   2.37163452
  0.16320000   2.36662391
  0.16320000   2.37120746
  0.16320000   2.36701343
  0.16320000   2.37084963
  0.16320000   2.36733908
  0.16320000   2.37054982
  0.16320000   2.36761136
  0.16320000   2.37029864
  0.16320000   2.36783903
  0.16320000   2.37008818
  0.16320000   2.36802941
  0.16320000   2.36991186
  0.16320000   2.36818860
  0.16320000   2.36976413
  0.16320000   2.36832170
  0.16320000   2.36964036
  0.16320000   2.36843300
  0.16320000   2.36953664
  0.16320000   2.36852605
  0.16320000   2.36944973
  0.16320000   2.36860383
  0.16320000   2.36937690
  0.16340000   2.36563480
  0.16340000   2.37251798
  0.16340000   2.36619649
  0.16340000   2.37200409
  0.16340000   2.36666973
  0.16340000   2.37156998
  0.16340000   2.36706853
  0.16340000   2.37120329
  0.16340000   2.36740465
  0.16340000   2.37089355
  0.16340000   2.36768798
  0.16340000   2.37063192
  0.16340000   2.36792683
  0.16340000   2.37041095
  0.16340000   2.36812819
  0.16340000   2.37022431
  0.16340000   2.36829796
  0.16340000   2.37006667
  0.16340000   2.36844108
  0.16340000   2.36993353
  0.16340000   2.36856174
  0.16340000   2.36982107
  0.16340000   2.36866346
  0.16340000   2.36972607
  0.16360000   2.36501315
  0.16360000   2.37349151
  0.16360000   2.36567540
  0.16360000   2.37288658
  0.16360000   2.36623769
  0.16360000   2.37237140
  0.16360000   2.36671525
  0.16360000   2.37193269
  0.16360000   2.36712094
  0.16360000   2.37155910
  0.16360000   2.36746564
  0.16360000   2.37124098
  0.16360000   2.36775857
  0.16360000   2.37097011
  0.16360000   2.36800751
  0.16360000   2.37073947
  0.16360000   2.36821910
  0.16360000   2.37054310
  0.16360000   2.36839894
  0.16360000   2.37037591
  0.16360000   2.36855180
  0.16360000   2.37023355
  0.16360000   2.36868173
  0.16360000   2.37011235
  0.16380000   2.36428505
  0.16380000   2.37456225
  0.16380000   2.36505194
  0.16380000   2.37386292
  0.16380000   2.36570802
  0.16380000   2.37326256
  0.16380000   2.36626953
  0.16380000   2.37274719
  0.16380000   2.36675025
  0.16380000   2.37230477
  0.16380000   2.36716193
  0.16380000   2.37192499
  0.16380000   2.36751453
  0.16380000   2.37159900
  0.16380000   2.36781658
  0.16380000   2.37131920
  0.16380000   2.36807536
  0.16380000   2.37107904
  0.16380000   2.36829709
  0.16380000   2.37087291
  0.16380000   2.36848709
  0.16380000   2.37069601
  0.16380000   2.36864990
  0.16380000   2.37054417
  0.16400000   2.36344260
  0.16400000   2.37573718
  0.16400000   2.36431722
  0.16400000   2.37494114
  0.16400000   2.36507104
  0.16400000   2.37425236
  0.16400000   2.36572109
  0.16400000   2.37365636
  0.16400000   2.36628187
  0.16400000   2.37314063
  0.16400000   2.36676582
  0.16400000   2.37269437
  0.16400000   2.36718356
  0.16400000   2.37230824
  0.16400000   2.36754424
  0.16400000   2.37197414
  0.16400000   2.36785568
  0.16400000   2.37168508
  0.16400000   2.36812466
  0.16400000   2.37143499
  0.16400000   2.36835698
  0.16400000   2.37121862
  0.16400000   2.36855766
  0.16400000   2.37103144
  0.16420000   2.36247801
  0.16420000   2.37702296
  0.16420000   2.36346233
  0.16420000   2.37612915
  0.16420000   2.36431686
  0.16420000   2.37534976
  0.16420000   2.36505921
  0.16420000   2.37467006
  0.16420000   2.36570444
  0.16420000   2.37407727
  0.16420000   2.36626550
  0.16420000   2.37356025
  0.16420000   2.36675353
  0.16420000   2.37310933
  0.16420000   2.36717814
  0.16420000   2.37271606
  0.16420000   2.36754767
  0.16420000   2.37237308
  0.16420000   2.36786931
  0.16420000   2.37207396
  0.16420000   2.36814930
  0.16420000   2.37181311
  0.16420000   2.36839307
  0.16420000   2.37158565
  0.16440000   2.36138376
  0.16440000   2.37842574
  0.16440000   2.36247842
  0.16440000   2.37743451
  0.16440000   2.36343547
  0.16440000   2.37656362
  0.16440000   2.36427288
  0.16440000   2.37579828
  0.16440000   2.36500608
  0.16440000   2.37512561
  0.16440000   2.36564838
  0.16440000   2.37453433
  0.16440000   2.36621129
  0.16440000   2.37401458
  0.16440000   2.36670479
  0.16440000   2.37355770
  0.16440000   2.36713757
  0.16440000   2.37315608
  0.16440000   2.36751717
  0.16440000   2.37280306
  0.16440000   2.36785020
  0.16440000   2.37249274
  0.16440000   2.36814241
  0.16440000   2.37221998
  0.16460000   2.36015280
  0.16460000   2.37995099
  0.16460000   2.36135698
  0.16460000   2.37886426
  0.16460000   2.36241696
  0.16460000   2.37790243
  0.16460000   2.36335093
  0.16460000   2.37705085
  0.16460000   2.36417454
  0.16460000   2.37629669
  0.16460000   2.36490128
  0.16460000   2.37562869
  0.16460000   2.36554290
  0.16460000   2.37503695
  0.16460000   2.36610961
  0.16460000   2.37451273
  0.16460000   2.36661033
  0.16460000   2.37404831
  0.16460000   2.36705288
  0.16460000   2.37363686
  0.16460000   2.36744410
  0.16460000   2.37327234
  0.16460000   2.36779002
  0.16460000   2.37294940
  0.16480000   2.35877873
  0.16480000   2.38160327
  0.16480000   2.36008995
  0.16480000   2.38042468
  0.16480000   2.36125173
  0.16480000   2.37937413
  0.16480000   2.36228232
  0.16480000   2.37843725
  0.16480000   2.36319742
  0.16480000   2.37760142
  0.16480000   2.36401062
  0.16480000   2.37685553
  0.16480000   2.36473372
  0.16480000   2.37618978
  0.16480000   2.36537707
  0.16480000   2.37559547
  0.16480000   2.36594971
  0.16480000   2.37506490
  0.16480000   2.36645959
  0.16480000   2.37459119
  0.16480000   2.36691374
  0.16480000   2.37416825
  0.16480000   2.36731834
  0.16480000   2.37379063
  0.16500000   2.35725595
  0.16500000   2.38338606
  0.16500000   2.35867002
  0.16500000   2.38212100
  0.16500000   2.35993074
  0.16500000   2.38098574
  0.16500000   2.36105634
  0.16500000   2.37996625
  0.16500000   2.36206247
  0.16500000   2.37905023
  0.16500000   2.36296266
  0.16500000   2.37822684
  0.16500000   2.36376871
  0.16500000   2.37748649
  0.16500000   2.36449095
  0.16500000   2.37682064
  0.16500000   2.36513843
  0.16500000   2.37622171
  0.16500000   2.36571917
  0.16500000   2.37568290
  0.16500000   2.36624023
  0.16500000   2.37519814
  0.16500000   2.36670790
  0.16500000   2.37476198
  0.16520000   2.35557988
  0.16520000   2.38530154
  0.16520000   2.35709080
  0.16520000   2.38395721
  0.16520000   2.35844579
  0.16520000   2.38274309
  0.16520000   2.35966297
  0.16520000   2.38164556
  0.16520000   2.36075787
  0.16520000   2.38065269
  0.16520000   2.36174391
  0.16520000   2.37975399
  0.16520000   2.36263275
  0.16520000   2.37894016
  0.16520000   2.36343463
  0.16520000   2.37820293
  0.16520000   2.36415852
  0.16520000   2.37753491
  0.16520000   2.36481240
  0.16520000   2.37692948
  0.16520000   2.36540330
  0.16520000   2.37638069
  0.16520000   2.36593750
  0.16520000   2.37588318
  0.16540000   2.35374718
  0.16540000   2.38735040
  0.16540000   2.35534713
  0.16540000   2.38593577
  0.16540000   2.35678981
  0.16540000   2.38465054
  0.16540000   2.35809320
  0.16540000   2.38348149
  0.16540000   2.35927268
  0.16540000   2.38241711
  0.16540000   2.36034147
  0.16540000   2.38144728
  0.16540000   2.36131107
  0.16540000   2.38056305
  0.16540000   2.36219155
  0.16540000   2.37975647
  0.16540000   2.36299174
  0.16540000   2.37902043
  0.16540000   2.36371946
  0.16540000   2.37834855
  0.16540000   2.36438167
  0.16540000   2.37773509
  0.16540000   2.36498456
  0.16540000   2.37717485
  0.16560000   2.35175587
  0.16560000   2.38953174
  0.16560000   2.35343526
  0.16560000   2.38805741
  0.16560000   2.35495715
  0.16560000   2.38671062
  0.16560000   2.35633939
  0.16560000   2.38547854
  0.16560000   2.35759718
  0.16560000   2.38435003
  0.16560000   2.35874355
  0.16560000   2.38331536
  0.16560000   2.35978979
  0.16560000   2.38236595
  0.16560000   2.36074576
  0.16560000   2.38149421
  0.16560000   2.36162009
  0.16560000   2.38069333
  0.16560000   2.36242044
  0.16560000   2.37995721
  0.16560000   2.36315358
  0.16560000   2.37928039
  0.16560000   2.36382559
  0.16560000   2.37865788
  0.16580000   2.34960549
  0.16580000   2.39184290
  0.16580000   2.35135312
  0.16580000   2.39032093
  0.16580000   2.35294390
  0.16580000   2.38892381
  0.16580000   2.35439564
  0.16580000   2.38763903
  0.16580000   2.35572338
  0.16580000   2.38645580
  0.16580000   2.35693996
  0.16580000   2.38536474
  0.16580000   2.35805647
  0.16580000   2.38435763
  0.16580000   2.35908254
  0.16580000   2.38342719
  0.16580000   2.36002660
  0.16580000   2.38256696
  0.16580000   2.36089608
  0.16580000   2.38177116
  0.16580000   2.36169759
  0.16580000   2.38103458
  0.16580000   2.36243698
  0.16580000   2.38035253
  0.16600000   2.34729726
  0.16600000   2.39427948
  0.16600000   2.34910043
  0.16600000   2.39272309
  0.16600000   2.35074815
  0.16600000   2.39128830
  0.16600000   2.35225817
  0.16600000   2.38996282
  0.16600000   2.35364545
  0.16600000   2.38873615
  0.16600000   2.35492268
  0.16600000   2.38759920
  0.16600000   2.35610078
  0.16600000   2.38654406
  0.16600000   2.35718916
  0.16600000   2.38556375
  0.16600000   2.35819605
  0.16600000   2.38465213
  0.16600000   2.35912869
  0.16600000   2.38380370
  0.16600000   2.35999344
  0.16600000   2.38301354
  0.16600000   2.36079600
  0.16600000   2.38227722
  0.16620000   2.34483407
  0.16620000   2.39683528
  0.16620000   2.34667892
  0.16620000   2.39525855
  0.16620000   2.34837016
  0.16620000   2.39379984
  0.16620000   2.34992559
  0.16620000   2.39244703
  0.16620000   2.35136014
  0.16620000   2.39118980
  0.16620000   2.35268641
  0.16620000   2.39001931
  0.16620000   2.35391516
  0.16620000   2.38892787
  0.16620000   2.35505567
  0.16620000   2.38790877
  0.16620000   2.35611598
  0.16620000   2.38695611
  0.16620000   2.35710313
  0.16620000   2.38606466
  0.16620000   2.35802331
  0.16620000   2.38522975
  0.16620000   2.35888202
  0.16620000   2.38444721
  0.16640000   2.34222057
  0.16640000   2.39950242
  0.16640000   2.34409235
  0.16640000   2.39791987
  0.16640000   2.34581258
  0.16640000   2.39645171
  0.16640000   2.34739920
  0.16640000   2.39508590
  0.16640000   2.34886715
  0.16640000   2.39381223
  0.16640000   2.35022901
  0.16640000   2.39262201
  0.16640000   2.35149546
  0.16640000   2.39150773
  0.16640000   2.35267567
  0.16640000   2.39046287
  0.16640000   2.35377755
  0.16640000   2.38948172
  0.16640000   2.35480799
  0.16640000   2.38855926
  0.16640000   2.35577303
  0.16640000   2.38769104
  0.16640000   2.35667799
  0.16640000   2.38687307
  0.16660000   2.33946307
  0.16660000   2.40227143
  0.16660000   2.34134651
  0.16660000   2.40069762
  0.16660000   2.34308048
  0.16660000   2.39923475
  0.16660000   2.34468309
  0.16660000   2.39787076
  0.16660000   2.34616939
  0.16660000   2.39659551
  0.16660000   2.34755196
  0.16660000   2.39540038
  0.16660000   2.34884149
  0.16660000   2.39427797
  0.16660000   2.35004706
  0.16660000   2.39322189
  0.16660000   2.35117653
  0.16660000   2.39222656
  0.16660000   2.35223668
  0.16660000   2.39128712
  0.16660000   2.35323342
  0.16660000   2.39039925
  0.16660000   2.35417198
  0.16660000   2.38955915
  0.16680000   2.33656947
  0.16680000   2.40513153
  0.16680000   2.33844919
  0.16680000   2.40358063
  0.16680000   2.34018133
  0.16680000   2.40213755
  0.16680000   2.34178425
  0.16680000   2.40079018
  0.16680000   2.34327311
  0.16680000   2.39952839
  0.16680000   2.34466058
  0.16680000   2.39834357
  0.16680000   2.34595737
  0.16680000   2.39722839
  0.16680000   2.34717258
  0.16680000   2.39617652
  0.16680000   2.34831400
  0.16680000   2.39518247
  0.16680000   2.34938838
  0.16680000   2.39424147
  0.16680000   2.35040157
  0.16680000   2.39334930
  0.16680000   2.35135869
  0.16680000   2.39250226
  0.16700000   2.33354909
  0.16700000   2.40807079
  0.16700000   2.33541001
  0.16700000   2.40655617
  0.16700000   2.33712492
  0.16700000   2.40514670
  0.16700000   2.33871243
  0.16700000   2.40383020
  0.16700000   2.34018790
  0.16700000   2.40259650
  0.16700000   2.34156410
  0.16700000   2.40143698
  0.16700000   2.34285181
  0.16700000   2.40034433
  0.16700000   2.34406014
  0.16700000   2.39931225
  0.16700000   2.34519691
  0.16700000   2.39833531
  0.16700000   2.34626884
  0.16700000   2.39740876
  0.16700000   2.34728175
  0.16700000   2.39652847
  0.16700000   2.34824074
  0.16700000   2.39569079
  0.16720000   2.33041248
  0.16720000   2.41107652
  0.16720000   2.33224018
  0.16720000   2.40961036
  0.16720000   2.33392305
  0.16720000   2.40824719
  0.16720000   2.33547998
  0.16720000   2.40697474
  0.16720000   2.33692651
  0.16720000   2.40578276
  0.16720000   2.33827556
  0.16720000   2.40466264
  0.16720000   2.33953796
  0.16720000   2.40360705
  0.16720000   2.34072292
  0.16720000   2.40260970
  0.16720000   2.34183825
  0.16720000   2.40166517
  0.16720000   2.34289069
  0.16720000   2.40076877
  0.16720000   2.34388606
  0.16720000   2.39991637
  0.16720000   2.34482945
  0.16720000   2.39910438
  0.16740000   2.32717115
  0.16740000   2.41413551
  0.16740000   2.32895226
  0.16740000   2.41272853
  0.16740000   2.33058931
  0.16740000   2.41142284
  0.16740000   2.33210147
  0.16740000   2.41020609
  0.16740000   2.33350448
  0.16740000   2.40906798
  0.16740000   2.33481140
  0.16740000   2.40799986
  0.16740000   2.33603316
  0.16740000   2.40699438
  0.16740000   2.33717900
  0.16740000   2.40604527
  0.16740000   2.33825680
  0.16740000   2.40514711
  0.16740000   2.33927331
  0.16740000   2.40429523
  0.16740000   2.34023436
  0.16740000   2.40348554
  0.16740000   2.34114503
  0.16740000   2.40271446
  0.16760000   2.32383734
  0.16760000   2.41723440
  0.16760000   2.32555983
  0.16760000   2.41589560
  0.16760000   2.32713867
  0.16760000   2.41465679
  0.16760000   2.32859331
  0.16760000   2.41350554
  0.16760000   2.32993970
  0.16760000   2.41243149
  0.16760000   2.33119101
  0.16760000   2.41142596
  0.16760000   2.33235829
  0.16760000   2.41048161
  0.16760000   2.33345083
  0.16760000   2.40959215
  0.16760000   2.33447654
  0.16760000   2.40875220
  0.16760000   2.33544220
  0.16760000   2.40795708
  0.16760000   2.33635366
  0.16760000   2.40720273
  0.16760000   2.33721597
  0.16760000   2.40648560
  0.16780000   2.32042367
  0.16780000   2.42036001
  0.16780000   2.32207711
  0.16780000   2.41909653
  0.16780000   2.32358704
  0.16780000   2.41793202
  0.16780000   2.32497321
  0.16780000   2.41685395
  0.16780000   2.32625174
  0.16780000   2.41585193
  0.16780000   2.32743597
  0.16780000   2.41491725
  0.16780000   2.32853701
  0.16780000   2.41404255
  0.16780000   2.32956423
  0.16780000   2.41322158
  0.16780000   2.33052556
  0.16780000   2.41244894
  0.16780000   2.33142780
  0.16780000   2.41171999
  0.16780000   2.33227681
  0.16780000   2.41103069
  0.16780000   2.33307766
  0.16780000   2.41037751
  0.16800000   2.31694294
  0.16800000   2.42349959
  0.16800000   2.31851863
  0.16800000   2.42231667
  0.16800000   2.31995084
  0.16800000   2.42123181
  0.16800000   2.32125961
  0.16800000   2.42023239
  0.16800000   2.32246126
  0.16800000   2.41930799
  0.16800000   2.32356925
  0.16800000   2.41844987
  0.16800000   2.32459480
  0.16800000   2.41765068
  0.16800000   2.32554731
  0.16800000   2.41690414
  0.16800000   2.32643476
  0.16800000   2.41620489
  0.16800000   2.32726398
  0.16800000   2.41554831
  0.16800000   2.32804082
  0.16800000   2.41493038
  0.16800000   2.32877034
  0.16800000   2.41434760
  0.16820000   2.31340779
  0.16820000   2.42664110
  0.16820000   2.31489887
  0.16820000   2.42554209
  0.16820000   2.31624656
  0.16820000   2.42454019
  0.16820000   2.31747118
  0.16820000   2.42362271
  0.16820000   2.31858926
  0.16820000   2.42277914
  0.16820000   2.31961440
  0.16820000   2.42200074
  0.16820000   2.32055789
  0.16820000   2.42128015
  0.16820000   2.32142922
  0.16820000   2.42061109
  0.16820000   2.32223640
  0.16820000   2.41998822
  0.16820000   2.32298626
  0.16820000   2.41940693
  0.16820000   2.32368469
  0.16820000   2.41886323
  0.16820000   2.32433673
  0.16820000   2.41835363
  0.16840000   2.30983051
  0.16840000   2.42977341
  0.16840000   2.31123196
  0.16840000   2.42875989
  0.16840000   2.31249034
  0.16840000   2.42784234
  0.16840000   2.31362627
  0.16840000   2.42700796
  0.16840000   2.31465647
  0.16840000   2.42624620
  0.16840000   2.31559470
  0.16840000   2.42554828
  0.16840000   2.31645234
  0.16840000   2.42490682
  0.16840000   2.31723894
  0.16840000   2.42431556
  0.16840000   2.31796257
  0.16840000   2.42376916
  0.16840000   2.31863008
  0.16840000   2.42326301
  0.16840000   2.31924737
  0.16840000   2.42279315
  0.16840000   2.31981950
  0.16840000   2.42235610
  0.16860000   2.30622278
  0.16860000   2.43288643
  0.16860000   2.30753139
  0.16860000   2.43195838
  0.16860000   2.30869763
  0.16860000   2.43112481
  0.16860000   2.30974243
  0.16860000   2.43037284
  0.16860000   2.31068275
  0.16860000   2.42969184
  0.16860000   2.31153246
  0.16860000   2.42907303
  0.16860000   2.31230306
  0.16860000   2.42850898
  0.16860000   2.31300417
  0.16860000   2.42799344
  0.16860000   2.31364391
  0.16860000   2.42752108
  0.16860000   2.31422916
  0.16860000   2.42708731
  0.16860000   2.31476583
  0.16860000   2.42668817
  0.16860000   2.31525900
  0.16860000   2.42632021
  0.16880000   2.30259557
  0.16880000   2.43597125
  0.16880000   2.30380979
  0.16880000   2.43512721
  0.16880000   2.30488289
  0.16880000   2.43437575
  0.16880000   2.30583611
  0.16880000   2.43370387
  0.16880000   2.30668659
  0.16880000   2.43310091
  0.16880000   2.30744839
  0.16880000   2.43255803
  0.16880000   2.30813311
  0.16880000   2.43206782
  0.16880000   2.30875042
  0.16880000   2.43162402
  0.16880000   2.30930848
  0.16880000   2.43122130
  0.16880000   2.30981422
  0.16880000   2.43085510
  0.16880000   2.31027353
  0.16880000   2.43052147
  0.16880000   2.31069152
  0.16880000   2.43021702
  0.16900000   2.29895895
  0.16900000   2.43902015
  0.16900000   2.30007878
  0.16900000   2.43825748
  0.16900000   2.30105937
  0.16900000   2.43758500
  0.16900000   2.30192225
  0.16900000   2.43698961
  0.16900000   2.30268481
  0.16900000   2.43646060
  0.16900000   2.30336122
  0.16900000   2.43598913
  0.16900000   2.30396316
  0.16900000   2.43556777
  0.16900000   2.30450038
  0.16900000   2.43519029
  0.16900000   2.30498105
  0.16900000   2.43485140
  0.16900000   2.30541209
  0.16900000   2.43454656
  0.16900000   2.30579940
  0.16900000   2.43427189
  0.16900000   2.30614805
  0.16900000   2.43402402
  0.16920000   2.29532207
  0.16920000   2.44202660
  0.16920000   2.29634883
  0.16920000   2.44134172
  0.16920000   2.29723895
  0.16920000   2.44074410
  0.16920000   2.29801424
  0.16920000   2.44022060
  0.16920000   2.29869227
  0.16920000   2.43976049
  0.16920000   2.29928732
  0.16920000   2.43935490
  0.16920000   2.29981115
  0.16920000   2.43899648
  0.16920000   2.30027351
  0.16920000   2.43867902
  0.16920000   2.30068257
  0.16920000   2.43839730
  0.16920000   2.30104521
  0.16920000   2.43814684
  0.16920000   2.30136729
  0.16920000   2.43792385
  0.16920000   2.30165381
  0.16920000   2.43772502
  0.16940000   2.29169307
  0.16940000   2.44498526
  0.16940000   2.29262923
  0.16940000   2.44437385
  0.16940000   2.29343207
  0.16940000   2.44384628
  0.16940000   2.29412368
  0.16940000   2.44338938
  0.16940000   2.29472177
  0.16940000   2.44299244
  0.16940000   2.29524067
  0.16940000   2.44264666
  0.16940000   2.29569216
  0.16940000   2.44234472
  0.16940000   2.29608594
  0.16940000   2.44208053
  0.16940000   2.29643013
  0.16940000   2.44184896
  0.16940000   2.29673154
  0.16940000   2.44164565
  0.16940000   2.29699591
  0.16940000   2.44146691
  0.16940000   2.29722813
  0.16940000   2.44130957
  0.16960000   2.28807908
  0.16960000   2.44789188
  0.16960000   2.28892803
  0.16960000   2.44734911
  0.16960000   2.28964774
  0.16960000   2.44688631
  0.16960000   2.29026049
  0.16960000   2.44649032
  0.16960000   2.29078406
  0.16960000   2.44615051
  0.16960000   2.29123278
  0.16960000   2.44585816
  0.16960000   2.29161838
  0.16960000   2.44560611
  0.16960000   2.29195047
  0.16960000   2.44538838
  0.16960000   2.29223703
  0.16960000   2.44519999
  0.16960000   2.29248472
  0.16960000   2.44503675
  0.16960000   2.29269912
  0.16960000   2.44489513
  0.16960000   2.29288494
  0.16960000   2.44477213
  0.16980000   2.28448626
  0.16980000   2.45074323
  0.16980000   2.28525213
  0.16980000   2.45026397
  0.16980000   2.28589353
  0.16980000   2.44986040
  0.16980000   2.28643286
  0.16980000   2.44951946
  0.16980000   2.28688788
  0.16980000   2.44923064
  0.16980000   2.28727286
  0.16980000   2.44898540
  0.16980000   2.28759936
  0.16980000   2.44877673
  0.16980000   2.28787684
  0.16980000   2.44859888
  0.16980000   2.28811306
  0.16980000   2.44844706
  0.16980000   2.28831447
  0.16980000   2.44831729
  0.16980000   2.28848643
  0.16980000   2.44820624
  0.16980000   2.28863340
  0.16980000   2.44811110
  0.17000000   2.28091983
  0.17000000   2.45353698
  0.17000000   2.28160728
  0.17000000   2.45311596
  0.17000000   2.28217567
  0.17000000   2.45276603
  0.17000000   2.28264740
  0.17000000   2.45247430
  0.17000000   2.28304013
  0.17000000   2.45223046
  0.17000000   2.28336794
  0.17000000   2.45202621
  0.17000000   2.28364218
  0.17000000   2.45185479
  0.17000000   2.28387202
  0.17000000   2.45171069
  0.17000000   2.28406497
  0.17000000   2.45158937
  0.17000000   2.28422717
  0.17000000   2.45148711
  0.17000000   2.28436368
  0.17000000   2.45140080
  0.17000000   2.28447870
  0.17000000   2.45132788
  0.17020000   2.27738412
  0.17020000   2.45627165
  0.17020000   2.27799819
  0.17020000   2.45590357
  0.17020000   2.27849915
  0.17020000   2.45560176
  0.17020000   2.27890927
  0.17020000   2.45535359
  0.17020000   2.27924602
  0.17020000   2.45514902
  0.17020000   2.27952318
  0.17020000   2.45498003
  0.17020000   2.27975176
  0.17020000   2.45484019
  0.17020000   2.27994061
  0.17020000   2.45472427
  0.17020000   2.28009687
  0.17020000   2.45462805
  0.17020000   2.28022633
  0.17020000   2.45454806
  0.17020000   2.28033372
  0.17020000   2.45448149
  0.17020000   2.28042288
  0.17020000   2.45442602
  0.17040000   2.27388266
  0.17040000   2.45894641
  0.17040000   2.27442860
  0.17040000   2.45862610
  0.17040000   2.27486781
  0.17040000   2.45836711
  0.17040000   2.27522233
  0.17040000   2.45815714
  0.17040000   2.27550926
  0.17040000   2.45798649
  0.17040000   2.27574202
  0.17040000   2.45784752
  0.17040000   2.27593120
  0.17040000   2.45773414
  0.17040000   2.27608521
  0.17040000   2.45764149
  0.17040000   2.27621077
  0.17040000   2.45756565
  0.17040000   2.27631326
  0.17040000   2.45750348
  0.17040000   2.27639704
  0.17040000   2.45745244
  0.17040000   2.27646559
  0.17040000   2.45741048
  0.17060000   2.27041825
  0.17060000   2.46156105
  0.17060000   2.27090140
  0.17060000   2.46128353
  0.17060000   2.27128452
  0.17060000   2.46106235
  0.17060000   2.27158927
  0.17060000   2.46088558
  0.17060000   2.27183231
  0.17060000   2.46074398
  0.17060000   2.27202655
  0.17060000   2.46063031
  0.17060000   2.27218207
  0.17060000   2.46053889
  0.17060000   2.27230679
  0.17060000   2.46046523
  0.17060000   2.27240697
  0.17060000   2.46040576
  0.17060000   2.27248753
  0.17060000   2.46035767
  0.17060000   2.27255241
  0.17060000   2.46031870
  0.17060000   2.27260474
  0.17060000   2.46028706
  0.17080000   2.26699304
  0.17080000   2.46411586
  0.17080000   2.26741870
  0.17080000   2.46387642
  0.17080000   2.26775126
  0.17080000   2.46368835
  0.17080000   2.26801185
  0.17080000   2.46354023
  0.17080000   2.26821654
  0.17080000   2.46342328
  0.17080000   2.26837766
  0.17080000   2.46333075
  0.17080000   2.26850472
  0.17080000   2.46325737
  0.17080000   2.26860509
  0.17080000   2.46319905
  0.17080000   2.26868449
  0.17080000   2.46315260
  0.17080000   2.26874742
  0.17080000   2.46311551
  0.17080000   2.26879736
  0.17080000   2.46308582
  0.17080000   2.26883707
  0.17080000   2.46306199
  0.17100000   2.26360860
  0.17100000   2.46661152
  0.17100000   2.26398198
  0.17100000   2.46640575
  0.17100000   2.26426928
  0.17100000   2.46624649
  0.17100000   2.26449096
  0.17100000   2.46612290
  0.17100000   2.26466243
  0.17100000   2.46602672
  0.17100000   2.26479533
  0.17100000   2.46595168
  0.17100000   2.26489855
  0.17100000   2.46589299
  0.17100000   2.26497885
  0.17100000   2.46584696
  0.17100000   2.26504144
  0.17100000   2.46581076
  0.17100000   2.26509033
  0.17100000   2.46578218
  0.17100000   2.26512858
  0.17100000   2.46575955
  0.17100000   2.26515858
  0.17100000   2.46574156
  0.17120000   2.26026602
  0.17120000   2.46904904
  0.17120000   2.26059214
  0.17120000   2.46887286
  0.17120000   2.26083918
  0.17120000   2.46873852
  0.17120000   2.26102684
  0.17120000   2.46863576
  0.17120000   2.26116975
  0.17120000   2.46855694
  0.17120000   2.26127881
  0.17120000   2.46849628
  0.17120000   2.26136222
  0.17120000   2.46844946
  0.17120000   2.26142614
  0.17120000   2.46841318
  0.17120000   2.26147525
  0.17120000   2.46838496
  0.17120000   2.26151307
  0.17120000   2.46836292
  0.17120000   2.26154226
  0.17120000   2.46834561
  0.17120000   2.26156488
  0.17120000   2.46833194
  0.17140000   2.25696594
  0.17140000   2.47142969
  0.17140000   2.25724958
  0.17140000   2.47127936
  0.17140000   2.25746106
  0.17140000   2.47116642
  0.17140000   2.25761919
  0.17140000   2.47108127
  0.17140000   2.25773771
  0.17140000   2.47101684
  0.17140000   2.25782678
  0.17140000   2.47096791
  0.17140000   2.25789387
  0.17140000   2.47093059
  0.17140000   2.25794454
  0.17140000   2.47090199
  0.17140000   2.25798292
  0.17140000   2.47087996
  0.17140000   2.25801209
  0.17140000   2.47086289
  0.17140000   2.25803434
  0.17140000   2.47084956
  0.17140000   2.25805138
  0.17140000   2.47083906
  0.17160000   2.25370867
  0.17160000   2.47375492
  0.17160000   2.25395435
  0.17160000   2.47362706
  0.17160000   2.25413460
  0.17160000   2.47353239
  0.17160000   2.25426723
  0.17160000   2.47346200
  0.17160000   2.25436511
  0.17160000   2.47340944
  0.17160000   2.25443753
  0.17160000   2.47337000
  0.17160000   2.25449128
  0.17160000   2.47334025
  0.17160000   2.25453131
  0.17160000   2.47331765
  0.17160000   2.25456124
  0.17160000   2.47330037
  0.17160000   2.25458370
  0.17160000   2.47328704
  0.17160000   2.25460066
  0.17160000   2.47327666
  0.17160000   2.25461353
  0.17160000   2.47326849
  0.17180000   2.25049419
  0.17180000   2.47602633
  0.17180000   2.25070613
  0.17180000   2.47591789
  0.17180000   2.25085912
  0.17180000   2.47583872
  0.17180000   2.25096991
  0.17180000   2.47578065
  0.17180000   2.25105039
  0.17180000   2.47573780
  0.17180000   2.25110906
  0.17180000   2.47570600
  0.17180000   2.25115199
  0.17180000   2.47568222
  0.17180000   2.25118354
  0.17180000   2.47566428
  0.17180000   2.25120684
  0.17180000   2.47565062
  0.17180000   2.25122416
  0.17180000   2.47564009
  0.17180000   2.25123711
  0.17180000   2.47563189
  0.17180000   2.25124689
  0.17180000   2.47562540
  0.17200000   2.24732226
  0.17200000   2.47824561
  0.17200000   2.24750437
  0.17200000   2.47815386
  0.17200000   2.24763370
  0.17200000   2.47808778
  0.17200000   2.24772587
  0.17200000   2.47803991
  0.17200000   2.24779182
  0.17200000   2.47800497
  0.17200000   2.24783920
  0.17200000   2.47797927
  0.17200000   2.24787340
  0.17200000   2.47796017
  0.17200000   2.24789824
  0.17200000   2.47794582
  0.17200000   2.24791640
  0.17200000   2.47793490
  0.17200000   2.24792978
  0.17200000   2.47792647
  0.17200000   2.24793974
  0.17200000   2.47791986
  0.17200000   2.24794723
  0.17200000   2.47791459
  0.17220000   2.24419241
  0.17220000   2.48041450
  0.17220000   2.24434828
  0.17220000   2.48033702
  0.17220000   2.24445719
  0.17220000   2.48028194
  0.17220000   2.24453361
  0.17220000   2.48024247
  0.17220000   2.24458747
  0.17220000   2.48021393
  0.17220000   2.24462564
  0.17220000   2.48019306
  0.17220000   2.24465287
  0.17220000   2.48017762
  0.17220000   2.24467243
  0.17220000   2.48016602
  0.17220000   2.24468662
  0.17220000   2.48015717
  0.17220000   2.24469702
  0.17220000   2.48015029
  0.17220000   2.24470475
  0.17220000   2.48014485
  0.17220000   2.24471056
  0.17220000   2.48014044
  0.17240000   2.24110403
  0.17240000   2.48253477
  0.17240000   2.24123694
  0.17240000   2.48246944
  0.17240000   2.24132833
  0.17240000   2.48242354
  0.17240000   2.24139147
  0.17240000   2.48239095
  0.17240000   2.24143536
  0.17240000   2.48236755
  0.17240000   2.24146607
  0.17240000   2.48235051
  0.17240000   2.24148774
  0.17240000   2.48233790
  0.17240000   2.24150319
  0.17240000   2.48232840
  0.17240000   2.24151433
  0.17240000   2.48232110
  0.17240000   2.24152249
  0.17240000   2.48231537
  0.17240000   2.24152855
  0.17240000   2.48231076
  0.17240000   2.24153315
  0.17240000   2.48230699
  0.17260000   2.23805635
  0.17260000   2.48460822
  0.17260000   2.23816929
  0.17260000   2.48455317
  0.17260000   2.23824571
  0.17260000   2.48451488
  0.17260000   2.23829775
  0.17260000   2.48448791
  0.17260000   2.23833345
  0.17260000   2.48446862
  0.17260000   2.23835815
  0.17260000   2.48445458
  0.17260000   2.23837543
  0.17260000   2.48444416
  0.17260000   2.23838769
  0.17260000   2.48443625
  0.17260000   2.23839651
  0.17260000   2.48443011
  0.17260000   2.23840297
  0.17260000   2.48442521
  0.17260000   2.23840781
  0.17260000   2.48442122
  0.17260000   2.23841152
  0.17260000   2.48441790
  0.17280000   2.23504853
  0.17280000   2.48663660
  0.17280000   2.23514416
  0.17280000   2.48659021
  0.17280000   2.23520789
  0.17280000   2.48655822
  0.17280000   2.23525069
  0.17280000   2.48653579
  0.17280000   2.23527970
  0.17280000   2.48651977
  0.17280000   2.23529960
  0.17280000   2.48650808
  0.17280000   2.23531343
  0.17280000   2.48649934
  0.17280000   2.23532321
  0.17280000   2.48649263
  0.17280000   2.23533027
  0.17280000   2.48648735
  0.17280000   2.23533548
  0.17280000   2.48648307
  0.17280000   2.23533942
  0.17280000   2.48647953
  0.17280000   2.23534248
  0.17280000   2.48647653
  0.17300000   2.23207964
  0.17300000   2.48862166
  0.17300000   2.23216036
  0.17300000   2.48858253
  0.17300000   2.23221337
  0.17300000   2.48855570
  0.17300000   2.23224853
  0.17300000   2.48853694
  0.17300000   2.23227212
  0.17300000   2.48852351
  0.17300000   2.23228818
  0.17300000   2.48851364
  0.17300000   2.23229932
  0.17300000   2.48850619
  0.17300000   2.23230720
  0.17300000   2.48850038
  0.17300000   2.23231293
  0.17300000   2.48849573
  0.17300000   2.23231720
  0.17300000   2.48849191
  0.17300000   2.23232048
  0.17300000   2.48848870
  0.17300000   2.23232306
  0.17300000   2.48848593
  0.17320000   2.22914869
  0.17320000   2.49056508
  0.17320000   2.22921663
  0.17320000   2.49053201
  0.17320000   2.22926065
  0.17320000   2.49050941
  0.17320000   2.22928951
  0.17320000   2.49049359
  0.17320000   2.22930872
  0.17320000   2.49048220
  0.17320000   2.22932175
  0.17320000   2.49047374
  0.17320000   2.22933079
  0.17320000   2.49046726
  0.17320000   2.22933723
  0.17320000   2.49046214
  0.17320000   2.22934195
  0.17320000   2.49045797
  0.17320000   2.22934552
  0.17320000   2.49045448
  0.17320000   2.22934831
  0.17320000   2.49045150
  0.17320000   2.22935055
  0.17320000   2.49044891
  0.17340000   2.22625465
  0.17340000   2.49246853
  0.17340000   2.22631171
  0.17340000   2.49244048
  0.17340000   2.22634821
  0.17340000   2.49242132
  0.17340000   2.22637192
  0.17340000   2.49240785
  0.17340000   2.22638762
  0.17340000   2.49239805
  0.17340000   2.22639826
  0.17340000   2.49239069
  0.17340000   2.22640568
  0.17340000   2.49238495
  0.17340000   2.22641101
  0.17340000   2.49238034
  0.17340000   2.22641498
  0.17340000   2.49237652
  0.17340000   2.22641803
  0.17340000   2.49237329
  0.17340000   2.22642045
  0.17340000   2.49237049
  0.17340000   2.22642244
  0.17340000   2.49236802
  0.17360000   2.22339650
  0.17360000   2.49433360
  0.17360000   2.22344431
  0.17360000   2.49430969
  0.17360000   2.22347457
  0.17360000   2.49429332
  0.17360000   2.22349409
  0.17360000   2.49428171
  0.17360000   2.22350698
  0.17360000   2.49427317
  0.17360000   2.22351575
  0.17360000   2.49426664
  0.17360000   2.22352191
  0.17360000   2.49426147
  0.17360000   2.22352641
  0.17360000   2.49425724
  0.17360000   2.22352980
  0.17360000   2.49425369
  0.17360000   2.22353247
  0.17360000   2.49425064
  0.17360000   2.22353462
  0.17360000   2.49424797
  0.17360000   2.22353642
  0.17360000   2.49424561
  0.17380000   2.22057315
  0.17380000   2.49616182
  0.17380000   2.22061317
  0.17380000   2.49614132
  0.17380000   2.22063827
  0.17380000   2.49612719
  0.17380000   2.22065440
  0.17380000   2.49611706
  0.17380000   2.22066506
  0.17380000   2.49610948
  0.17380000   2.22067237
  0.17380000   2.49610360
  0.17380000   2.22067757
  0.17380000   2.49609886
  0.17380000   2.22068142
  0.17380000   2.49609493
  0.17380000   2.22068439
  0.17380000   2.49609158
  0.17380000   2.22068676
  0.17380000   2.49608867
  0.17380000   2.22068871
  0.17380000   2.49608611
  0.17380000   2.22069037
  0.17380000   2.49608382
  0.17400000   2.21778356
  0.17400000   2.49795467
  0.17400000   2.21781704
  0.17400000   2.49793695
  0.17400000   2.21783790
  0.17400000   2.49792463
  0.17400000   2.21785129
  0.17400000   2.49791566
  0.17400000   2.21786019
  0.17400000   2.49790884
  0.17400000   2.21786636
  0.17400000   2.49790346
  0.17400000   2.21787082
  0.17400000   2.49789905
  0.17400000   2.21787418
  0.17400000   2.49789533
  0.17400000   2.21787683
  0.17400000   2.49789214
  0.17400000   2.21787898
  0.17400000   2.49788934
  0.17400000   2.21788077
  0.17400000   2.49788686
  0.17400000   2.21788231
  0.17400000   2.49788463
  0.17420000   2.21502666
  0.17420000   2.49971357
  0.17420000   2.21505468
  0.17420000   2.49969812
  0.17420000   2.21507208
  0.17420000   2.49968723
  0.17420000   2.21508328
  0.17420000   2.49967918
  0.17420000   2.21509079
  0.17420000   2.49967295
  0.17420000   2.21509607
  0.17420000   2.49966794
  0.17420000   2.21509996
  0.17420000   2.49966379
  0.17420000   2.21510295
  0.17420000   2.49966025
  0.17420000   2.21510535
  0.17420000   2.49965718
  0.17420000   2.21510733
  0.17420000   2.49965447
  0.17420000   2.21510901
  0.17420000   2.49965205
  0.17420000   2.21511045
  0.17420000   2.49964988
  0.17440000   2.21230142
  0.17440000   2.50143986
  0.17440000   2.21232491
  0.17440000   2.50142626
  0.17440000   2.21233950
  0.17440000   2.50141651
  0.17440000   2.21234894
  0.17440000   2.50140918
  0.17440000   2.21235536
  0.17440000   2.50140341
  0.17440000   2.21235995
  0.17440000   2.50139870
  0.17440000   2.21236340
  0.17440000   2.50139474
  0.17440000   2.21236611
  0.17440000   2.50139133
  0.17440000   2.21236831
  0.17440000   2.50138836
  0.17440000   2.21237016
  0.17440000   2.50138572
  0.17440000   2.21237174
  0.17440000   2.50138335
  0.17440000   2.21237312
  0.17440000   2.50138122
  0.17460000   2.20960682
  0.17460000   2.50313485
  0.17460000   2.20962656
  0.17460000   2.50312272
  0.17460000   2.20963886
  0.17460000   2.50311389
  0.17460000   2.20964692
  0.17460000   2.50310712
  0.17460000   2.20965248
  0.17460000   2.50310171
  0.17460000   2.20965654
  0.17460000   2.50309723
  0.17460000   2.20965965
  0.17460000   2.50309342
  0.17460000   2.20966213
  0.17460000   2.50309012
  0.17460000   2.20966418
  0.17460000   2.50308723
  0.17460000   2.20966592
  0.17460000   2.50308464
  0.17460000   2.20966742
  0.17460000   2.50308233
  0.17460000   2.20966874
  0.17460000   2.50308024
  0.17480000   2.20694184
  0.17480000   2.50479976
  0.17480000   2.20695851
  0.17480000   2.50478882
  0.17480000   2.20696898
  0.17480000   2.50478071
  0.17480000   2.20697592
  0.17480000   2.50477439
  0.17480000   2.20698081
  0.17480000   2.50476925
  0.17480000   2.20698446
  0.17480000   2.50476495
  0.17480000   2.20698730
  0.17480000   2.50476127
  0.17480000   2.20698961
  0.17480000   2.50475806
  0.17480000   2.20699154
  0.17480000   2.50475522
  0.17480000   2.20699319
  0.17480000   2.50475269
  0.17480000   2.20699462
  0.17480000   2.50475042
  0.17480000   2.20699589
  0.17480000   2.50474836
  0.17500000   2.20430552
  0.17500000   2.50643575
  0.17500000   2.20431968
  0.17500000   2.50642577
  0.17500000   2.20432866
  0.17500000   2.50641823
  0.17500000   2.20433473
  0.17500000   2.50641226
  0.17500000   2.20433910
  0.17500000   2.50640735
  0.17500000   2.20434241
  0.17500000   2.50640319
  0.17500000   2.20434505
  0.17500000   2.50639961
  0.17500000   2.20434722
  0.17500000   2.50639647
  0.17500000   2.20434905
  0.17500000   2.50639369
  0.17500000   2.20435063
  0.17500000   2.50639120
  0.17500000   2.20435200
  0.17500000   2.50638896
  0.17500000   2.20435322
  0.17500000   2.50638693
  0.17520000   2.20169690
  0.17520000   2.50804395
  0.17520000   2.20170901
  0.17520000   2.50803474
  0.17520000   2.20171682
  0.17520000   2.50802765
  0.17520000   2.20172220
  0.17520000   2.50802195
  0.17520000   2.20172615
  0.17520000   2.50801721
  0.17520000   2.20172921
  0.17520000   2.50801318
  0.17520000   2.20173167
  0.17520000   2.50800967
  0.17520000   2.20173373
  0.17520000   2.50800659
  0.17520000   2.20173547
  0.17520000   2.50800386
  0.17520000   2.20173699
  0.17520000   2.50800142
  0.17520000   2.20173832
  0.17520000   2.50799921
  0.17520000   2.20173950
  0.17520000   2.50799721
  0.17540000   2.19911507
  0.17540000   2.50962540
  0.17540000   2.19912552
  0.17540000   2.50961680
  0.17540000   2.19913238
  0.17540000   2.50961008
  0.17540000   2.19913722
  0.17540000   2.50960460
  0.17540000   2.19914084
  0.17540000   2.50960000
  0.17540000   2.19914369
  0.17540000   2.50959606
  0.17540000   2.19914602
  0.17540000   2.50959263
  0.17540000   2.19914798
  0.17540000   2.50958960
  0.17540000   2.19914966
  0.17540000   2.50958691
  0.17540000   2.19915112
  0.17540000   2.50958450
  0.17540000   2.19915240
  0.17540000   2.50958232
  0.17540000   2.19915354
  0.17540000   2.50958035
  0.17560000   2.19655913
  0.17560000   2.51118111
  0.17560000   2.19656825
  0.17560000   2.51117300
  0.17560000   2.19657436
  0.17560000   2.51116657
  0.17560000   2.19657875
  0.17560000   2.51116127
  0.17560000   2.19658211
  0.17560000   2.51115679
  0.17560000   2.19658480
  0.17560000   2.51115293
  0.17560000   2.19658702
  0.17560000   2.51114956
  0.17560000   2.19658889
  0.17560000   2.51114658
  0.17560000   2.19659051
  0.17560000   2.51114393
  0.17560000   2.19659192
  0.17560000   2.51114155
  0.17560000   2.19659317
  0.17560000   2.51113940
  0.17560000   2.19659427
  0.17560000   2.51113745
  0.17580000   2.19402824
  0.17580000   2.51271204
  0.17580000   2.19403627
  0.17580000   2.51270432
  0.17580000   2.19404178
  0.17580000   2.51269812
  0.17580000   2.19404583
  0.17580000   2.51269296
  0.17580000   2.19404898
  0.17580000   2.51268858
  0.17580000   2.19405153
  0.17580000   2.51268479
  0.17580000   2.19405365
  0.17580000   2.51268147
  0.17580000   2.19405546
  0.17580000   2.51267854
  0.17580000   2.19405702
  0.17580000   2.51267592
  0.17580000   2.19405839
  0.17580000   2.51267357
  0.17580000   2.19405959
  0.17580000   2.51267145
  0.17580000   2.19406067
  0.17580000   2.51266952
  0.17600000   2.19152155
  0.17600000   2.51421908
  0.17600000   2.19152872
  0.17600000   2.51421168
  0.17600000   2.19153375
  0.17600000   2.51420566
  0.17600000   2.19153753
  0.17600000   2.51420063
  0.17600000   2.19154050
  0.17600000   2.51419633
  0.17600000   2.19154294
  0.17600000   2.51419260
  0.17600000   2.19154498
  0.17600000   2.51418933
  0.17600000   2.19154672
  0.17600000   2.51418643
  0.17600000   2.19154823
  0.17600000   2.51418385
  0.17600000   2.19154956
  0.17600000   2.51418153
  0.17600000   2.19155073
  0.17600000   2.51417943
  0.17600000   2.19155177
  0.17600000   2.51417752
  0.17620000   2.18903829
  0.17620000   2.51570310
  0.17620000   2.18904477
  0.17620000   2.51569595
  0.17620000   2.18904941
  0.17620000   2.51569009
  0.17620000   2.18905296
  0.17620000   2.51568516
  0.17620000   2.18905579
  0.17620000   2.51568093
  0.17620000   2.18905812
  0.17620000   2.51567726
  0.17620000   2.18906009
  0.17620000   2.51567403
  0.17620000   2.18906178
  0.17620000   2.51567117
  0.17620000   2.18906325
  0.17620000   2.51566861
  0.17620000   2.18906454
  0.17620000   2.51566632
  0.17620000   2.18906568
  0.17620000   2.51566424
  0.17620000   2.18906669
  0.17620000   2.51566235
  0.17640000   2.18657769
  0.17640000   2.51716490
  0.17640000   2.18658361
  0.17640000   2.51715796
  0.17640000   2.18658794
  0.17640000   2.51715223
  0.17640000   2.18659130
  0.17640000   2.51714738
  0.17640000   2.18659401
  0.17640000   2.51714322
  0.17640000   2.18659626
  0.17640000   2.51713960
  0.17640000   2.18659817
  0.17640000   2.51713641
  0.17640000   2.18659981
  0.17640000   2.51713358
  0.17640000   2.18660123
  0.17640000   2.51713105
  0.17640000   2.18660248
  0.17640000   2.51712878
  0.17640000   2.18660359
  0.17640000   2.51712673
  0.17640000   2.18660458
  0.17640000   2.51712486
  0.17660000   2.18413903
  0.17660000   2.51860525
  0.17660000   2.18414449
  0.17660000   2.51859849
  0.17660000   2.18414857
  0.17660000   2.51859287
  0.17660000   2.18415178
  0.17660000   2.51858810
  0.17660000   2.18415438
  0.17660000   2.51858399
  0.17660000   2.18415656
  0.17660000   2.51858041
  0.17660000   2.18415840
  0.17660000   2.51857726
  0.17660000   2.18415999
  0.17660000   2.51857446
  0.17660000   2.18416138
  0.17660000   2.51857196
  0.17660000   2.18416260
  0.17660000   2.51856971
  0.17660000   2.18416368
  0.17660000   2.51856768
  0.17660000   2.18416464
  0.17660000   2.51856583
  0.17680000   2.18172160
  0.17680000   2.52002490
  0.17680000   2.18172670
  0.17680000   2.52001827
  0.17680000   2.18173057
  0.17680000   2.52001275
  0.17680000   2.18173364
  0.17680000   2.52000805
  0.17680000   2.18173615
  0.17680000   2.52000399
  0.17680000   2.18173826
  0.17680000   2.52000046
  0.17680000   2.18174005
  0.17680000   2.51999734
  0.17680000   2.18174160
  0.17680000   2.51999457
  0.17680000   2.18174295
  0.17680000   2.51999210
  0.17680000   2.18174413
  0.17680000   2.51998987
  0.17680000   2.18174518
  0.17680000   2.51998785
  0.17680000   2.18174612
  0.17680000   2.51998602
  0.17700000   2.17932473
  0.17700000   2.52142452
  0.17700000   2.17932954
  0.17700000   2.52141802
  0.17700000   2.17933323
  0.17700000   2.52141258
  0.17700000   2.17933619
  0.17700000   2.52140794
  0.17700000   2.17933862
  0.17700000   2.52140393
  0.17700000   2.17934067
  0.17700000   2.52140043
  0.17700000   2.17934241
  0.17700000   2.52139735
  0.17700000   2.17934391
  0.17700000   2.52139461
  0.17700000   2.17934523
  0.17700000   2.52139216
  0.17700000   2.17934638
  0.17700000   2.52138995
  0.17700000   2.17934741
  0.17700000   2.52138796
  0.17700000   2.17934832
  0.17700000   2.52138614
  0.17720000   2.17694780
  0.17720000   2.52280478
  0.17720000   2.17695236
  0.17720000   2.52279839
  0.17720000   2.17695590
  0.17720000   2.52279302
  0.17720000   2.17695876
  0.17720000   2.52278844
  0.17720000   2.17696112
  0.17720000   2.52278448
  0.17720000   2.17696310
  0.17720000   2.52278101
  0.17720000   2.17696480
  0.17720000   2.52277796
  0.17720000   2.17696627
  0.17720000   2.52277525
  0.17720000   2.17696755
  0.17720000   2.52277282
  0.17720000   2.17696868
  0.17720000   2.52277063
  0.17720000   2.17696968
  0.17720000   2.52276866
  0.17720000   2.17697057
  0.17720000   2.52276686
  0.17740000   2.17459019
  0.17740000   2.52416631
  0.17740000   2.17459454
  0.17740000   2.52416001
  0.17740000   2.17459795
  0.17740000   2.52415472
  0.17740000   2.17460072
  0.17740000   2.52415018
  0.17740000   2.17460301
  0.17740000   2.52414626
  0.17740000   2.17460494
  0.17740000   2.52414283
  0.17740000   2.17460660
  0.17740000   2.52413981
  0.17740000   2.17460803
  0.17740000   2.52413712
  0.17740000   2.17460927
  0.17740000   2.52413471
  0.17740000   2.17461038
  0.17740000   2.52413255
  0.17740000   2.17461135
  0.17740000   2.52413059
  0.17740000   2.17461222
  0.17740000   2.52412880
  0.17760000   2.17225132
  0.17760000   2.52550971
  0.17760000   2.17225549
  0.17760000   2.52550349
  0.17760000   2.17225879
  0.17760000   2.52549825
  0.17760000   2.17226147
  0.17760000   2.52549377
  0.17760000   2.17226370
  0.17760000   2.52548989
  0.17760000   2.17226559
  0.17760000   2.52548649
  0.17760000   2.17226720
  0.17760000   2.52548349
  0.17760000   2.17226859
  0.17760000   2.52548083
  0.17760000   2.17226981
  0.17760000   2.52547844
  0.17760000   2.17227088
  0.17760000   2.52547630
  0.17760000   2.17227184
  0.17760000   2.52547435
  0.17760000   2.17227269
  0.17760000   2.52547258
  0.17780000   2.16993063
  0.17780000   2.52683553
  0.17780000   2.16993465
  0.17780000   2.52682939
  0.17780000   2.16993784
  0.17780000   2.52682420
  0.17780000   2.16994045
  0.17780000   2.52681977
  0.17780000   2.16994262
  0.17780000   2.52681592
  0.17780000   2.16994445
  0.17780000   2.52681255
  0.17780000   2.16994603
  0.17780000   2.52680959
  0.17780000   2.16994739
  0.17780000   2.52680694
  0.17780000   2.16994858
  0.17780000   2.52680458
  0.17780000   2.16994963
  0.17780000   2.52680245
  0.17780000   2.16995056
  0.17780000   2.52680052
  0.17780000   2.16995140
  0.17780000   2.52679877
  0.17800000   2.16762758
  0.17800000   2.52814431
  0.17800000   2.16763147
  0.17800000   2.52813824
  0.17800000   2.16763457
  0.17800000   2.52813311
  0.17800000   2.16763711
  0.17800000   2.52812872
  0.17800000   2.16763923
  0.17800000   2.52812491
  0.17800000   2.16764102
  0.17800000   2.52812157
  0.17800000   2.16764255
  0.17800000   2.52811863
  0.17800000   2.16764388
  0.17800000   2.52811601
  0.17800000   2.16764504
  0.17800000   2.52811366
  0.17800000   2.16764607
  0.17800000   2.52811155
  0.17800000   2.16764698
  0.17800000   2.52810964
  0.17800000   2.16764780
  0.17800000   2.52810789
  0.17820000   2.16534169
  0.17820000   2.52943658
  0.17820000   2.16534545
  0.17820000   2.52943057
  0.17820000   2.16534847
  0.17820000   2.52942549
  0.17820000   2.16535094
  0.17820000   2.52942114
  0.17820000   2.16535301
  0.17820000   2.52941736
  0.17820000   2.16535475
  0.17820000   2.52941405
  0.17820000   2.16535625
  0.17820000   2.52941113
  0.17820000   2.16535755
  0.17820000   2.52940853
  0.17820000   2.16535869
  0.17820000   2.52940621
  0.17820000   2.16535969
  0.17820000   2.52940411
  0.17820000   2.16536058
  0.17820000   2.52940221
  0.17820000   2.16536138
  0.17820000   2.52940048
  0.17840000   2.16307244
  0.17840000   2.53071281
  0.17840000   2.16307610
  0.17840000   2.53070686
  0.17840000   2.16307904
  0.17840000   2.53070183
  0.17840000   2.16308145
  0.17840000   2.53069752
  0.17840000   2.16308347
  0.17840000   2.53069377
  0.17840000   2.16308517
  0.17840000   2.53069049
  0.17840000   2.16308664
  0.17840000   2.53068759
  0.17840000   2.16308791
  0.17840000   2.53068502
  0.17840000   2.16308902
  0.17840000   2.53068271
  0.17840000   2.16309000
  0.17840000   2.53068063
  0.17840000   2.16309087
  0.17840000   2.53067874
  0.17840000   2.16309165
  0.17840000   2.53067702
  0.17860000   2.16081940
  0.17860000   2.53197347
  0.17860000   2.16082296
  0.17860000   2.53196759
  0.17860000   2.16082582
  0.17860000   2.53196260
  0.17860000   2.16082818
  0.17860000   2.53195832
  0.17860000   2.16083014
  0.17860000   2.53195461
  0.17860000   2.16083181
  0.17860000   2.53195135
  0.17860000   2.16083324
  0.17860000   2.53194848
  0.17860000   2.16083448
  0.17860000   2.53194592
  0.17860000   2.16083557
  0.17860000   2.53194362
  0.17860000   2.16083653
  0.17860000   2.53194156
  0.17860000   2.16083738
  0.17860000   2.53193969
  0.17860000   2.16083815
  0.17860000   2.53193798
  0.17880000   2.15858211
  0.17880000   2.53321902
  0.17880000   2.15858558
  0.17880000   2.53321319
  0.17880000   2.15858837
  0.17880000   2.53320824
  0.17880000   2.15859067
  0.17880000   2.53320400
  0.17880000   2.15859259
  0.17880000   2.53320031
  0.17880000   2.15859422
  0.17880000   2.53319708
  0.17880000   2.15859562
  0.17880000   2.53319423
  0.17880000   2.15859683
  0.17880000   2.53319169
  0.17880000   2.15859790
  0.17880000   2.53318941
  0.17880000   2.15859884
  0.17880000   2.53318736
  0.17880000   2.15859967
  0.17880000   2.53318550
  0.17880000   2.15860042
  0.17880000   2.53318381
  0.17900000   2.15636015
  0.17900000   2.53444987
  0.17900000   2.15636353
  0.17900000   2.53444408
  0.17900000   2.15636626
  0.17900000   2.53443918
  0.17900000   2.15636850
  0.17900000   2.53443497
  0.17900000   2.15637038
  0.17900000   2.53443131
  0.17900000   2.15637197
  0.17900000   2.53442811
  0.17900000   2.15637334
  0.17900000   2.53442527
  0.17900000   2.15637453
  0.17900000   2.53442275
  0.17900000   2.15637557
  0.17900000   2.53442049
  0.17900000   2.15637650
  0.17900000   2.53441845
  0.17900000   2.15637731
  0.17900000   2.53441661
  0.17900000   2.15637804
  0.17900000   2.53441492
  0.17920000   2.15415312
  0.17920000   2.53566642
  0.17920000   2.15415642
  0.17920000   2.53566068
  0.17920000   2.15415908
  0.17920000   2.53565582
  0.17920000   2.15416127
  0.17920000   2.53565165
  0.17920000   2.15416311
  0.17920000   2.53564802
  0.17920000   2.15416467
  0.17920000   2.53564483
  0.17920000   2.15416601
  0.17920000   2.53564202
  0.17920000   2.15416718
  0.17920000   2.53563951
  0.17920000   2.15416819
  0.17920000   2.53563727
  0.17920000   2.15416910
  0.17920000   2.53563524
  0.17920000   2.15416990
  0.17920000   2.53563341
  0.17920000   2.15417062
  0.17920000   2.53563174
  0.17940000   2.15196063
  0.17940000   2.53686907
  0.17940000   2.15196385
  0.17940000   2.53686338
  0.17940000   2.15196645
  0.17940000   2.53685856
  0.17940000   2.15196859
  0.17940000   2.53685441
  0.17940000   2.15197039
  0.17940000   2.53685081
  0.17940000   2.15197192
  0.17940000   2.53684765
  0.17940000   2.15197323
  0.17940000   2.53684485
  0.17940000   2.15197437
  0.17940000   2.53684236
  0.17940000   2.15197537
  0.17940000   2.53684013
  0.17940000   2.15197625
  0.17940000   2.53683812
  0.17940000   2.15197704
  0.17940000   2.53683630
  0.17940000   2.15197774
  0.17940000   2.53683464
  0.17960000   2.14978231
  0.17960000   2.53805819
  0.17960000   2.14978545
  0.17960000   2.53805255
  0.17960000   2.14978800
  0.17960000   2.53804776
  0.17960000   2.14979009
  0.17960000   2.53804364
  0.17960000   2.14979185
  0.17960000   2.53804006
  0.17960000   2.14979335
  0.17960000   2.53803692
  0.17960000   2.14979463
  0.17960000   2.53803415
  0.17960000   2.14979575
  0.17960000   2.53803167
  0.17960000   2.14979673
  0.17960000   2.53802946
  0.17960000   2.14979759
  0.17960000   2.53802746
  0.17960000   2.14979836
  0.17960000   2.53802565
  0.17960000   2.14979905
  0.17960000   2.53802400
  0.17980000   2.14761780
  0.17980000   2.53923413
  0.17980000   2.14762087
  0.17980000   2.53922853
  0.17980000   2.14762336
  0.17980000   2.53922378
  0.17980000   2.14762541
  0.17980000   2.53921969
  0.17980000   2.14762713
  0.17980000   2.53921614
  0.17980000   2.14762860
  0.17980000   2.53921302
  0.17980000   2.14762986
  0.17980000   2.53921026
  0.17980000   2.14763095
  0.17980000   2.53920780
  0.17980000   2.14763191
  0.17980000   2.53920560
  0.17980000   2.14763276
  0.17980000   2.53920361
  0.17980000   2.14763352
  0.17980000   2.53920181
  0.17980000   2.14763419
  0.17980000   2.53920017
  0.18000000   2.14546677
  0.18000000   2.54039723
  0.18000000   2.14546977
  0.18000000   2.54039167
  0.18000000   2.14547220
  0.18000000   2.54038695
  0.18000000   2.14547421
  0.18000000   2.54038289
  0.18000000   2.14547590
  0.18000000   2.54037936
  0.18000000   2.14547733
  0.18000000   2.54037627
  0.18000000   2.14547857
  0.18000000   2.54037353
  0.18000000   2.14547964
  0.18000000   2.54037109
  0.18000000   2.14548058
  0.18000000   2.54036889
  0.18000000   2.14548141
  0.18000000   2.54036692
  0.18000000   2.14548216
  0.18000000   2.54036513
  0.18000000   2.14548282
  0.18000000   2.54036350
  0.18020000   2.14332888
  0.18020000   2.54154782
  0.18020000   2.14333182
  0.18020000   2.54154231
  0.18020000   2.14333420
  0.18020000   2.54153762
  0.18020000   2.14333617
  0.18020000   2.54153359
  0.18020000   2.14333782
  0.18020000   2.54153008
  0.18020000   2.14333923
  0.18020000   2.54152700
  0.18020000   2.14334044
  0.18020000   2.54152428
  0.18020000   2.14334149
  0.18020000   2.54152185
  0.18020000   2.14334241
  0.18020000   2.54151967
  0.18020000   2.14334323
  0.18020000   2.54151771
  0.18020000   2.14334395
  0.18020000   2.54151593
  0.18020000   2.14334460
  0.18020000   2.54151430
  0.18040000   2.14120383
  0.18040000   2.54268622
  0.18040000   2.14120671
  0.18040000   2.54268075
  0.18040000   2.14120904
  0.18040000   2.54267609
  0.18040000   2.14121096
  0.18040000   2.54267208
  0.18040000   2.14121258
  0.18040000   2.54266860
  0.18040000   2.14121396
  0.18040000   2.54266554
  0.18040000   2.14121515
  0.18040000   2.54266283
  0.18040000   2.14121618
  0.18040000   2.54266042
  0.18040000   2.14121708
  0.18040000   2.54265825
  0.18040000   2.14121788
  0.18040000   2.54265630
  0.18040000   2.14121860
  0.18040000   2.54265453
  0.18040000   2.14121924
  0.18040000   2.54265291
  0.18060000   2.13909131
  0.18060000   2.54381272
  0.18060000   2.13909413
  0.18060000   2.54380729
  0.18060000   2.13909641
  0.18060000   2.54380266
  0.18060000   2.13909830
  0.18060000   2.54379868
  0.18060000   2.13909988
  0.18060000   2.54379522
  0.18060000   2.13910124
  0.18060000   2.54379218
  0.18060000   2.13910240
  0.18060000   2.54378948
  0.18060000   2.13910341
  0.18060000   2.54378708
  0.18060000   2.13910430
  0.18060000   2.54378493
  0.18060000   2.13910509
  0.18060000   2.54378299
  0.18060000   2.13910579
  0.18060000   2.54378122
  0.18060000   2.13910641
  0.18060000   2.54377962
  0.18080000   2.13699104
  0.18080000   2.54492762
  0.18080000   2.13699379
  0.18080000   2.54492222
  0.18080000   2.13699603
  0.18080000   2.54491763
  0.18080000   2.13699788
  0.18080000   2.54491367
  0.18080000   2.13699944
  0.18080000   2.54491022
  0.18080000   2.13700076
  0.18080000   2.54490720
  0.18080000   2.13700190
  0.18080000   2.54490452
  0.18080000   2.13700290
  0.18080000   2.54490214
  0.18080000   2.13700377
  0.18080000   2.54490000
  0.18080000   2.13700454
  0.18080000   2.54489806
  0.18080000   2.13700523
  0.18080000   2.54489631
  0.18080000   2.13700584
  0.18080000   2.54489471
  0.18100000   2.13490273
  0.18100000   2.54603120
  0.18100000   2.13490543
  0.18100000   2.54602583
  0.18100000   2.13490762
  0.18100000   2.54602126
  0.18100000   2.13490944
  0.18100000   2.54601733
  0.18100000   2.13491096
  0.18100000   2.54601390
  0.18100000   2.13491226
  0.18100000   2.54601090
  0.18100000   2.13491338
  0.18100000   2.54600823
  0.18100000   2.13491436
  0.18100000   2.54600586
  0.18100000   2.13491521
  0.18100000   2.54600373
  0.18100000   2.13491597
  0.18100000   2.54600181
  0.18100000   2.13491664
  0.18100000   2.54600006
  0.18100000   2.13491725
  0.18100000   2.54599847
  0.18120000   2.13282612
  0.18120000   2.54712371
  0.18120000   2.13282877
  0.18120000   2.54711837
  0.18120000   2.13283092
  0.18120000   2.54711383
  0.18120000   2.13283270
  0.18120000   2.54710992
  0.18120000   2.13283419
  0.18120000   2.54710652
  0.18120000   2.13283547
  0.18120000   2.54710353
  0.18120000   2.13283657
  0.18120000   2.54710088
  0.18120000   2.13283752
  0.18120000   2.54709852
  0.18120000   2.13283837
  0.18120000   2.54709640
  0.18120000   2.13283911
  0.18120000   2.54709449
  0.18120000   2.13283977
  0.18120000   2.54709275
  0.18120000   2.13284036
  0.18120000   2.54709117
  0.18140000   2.13076096
  0.18140000   2.54820542
  0.18140000   2.13076355
  0.18140000   2.54820012
  0.18140000   2.13076566
  0.18140000   2.54819560
  0.18140000   2.13076740
  0.18140000   2.54819172
  0.18140000   2.13076887
  0.18140000   2.54818833
  0.18140000   2.13077012
  0.18140000   2.54818536
  0.18140000   2.13077120
  0.18140000   2.54818272
  0.18140000   2.13077214
  0.18140000   2.54818037
  0.18140000   2.13077297
  0.18140000   2.54817826
  0.18140000   2.13077370
  0.18140000   2.54817636
  0.18140000   2.13077435
  0.18140000   2.54817463
  0.18140000   2.13077493
  0.18140000   2.54817306
  0.18160000   2.12870698
  0.18160000   2.54927657
  0.18160000   2.12870952
  0.18160000   2.54927131
  0.18160000   2.12871159
  0.18160000   2.54926682
  0.18160000   2.12871330
  0.18160000   2.54926295
  0.18160000   2.12871475
  0.18160000   2.54925958
  0.18160000   2.12871597
  0.18160000   2.54925663
  0.18160000   2.12871703
  0.18160000   2.54925400
  0.18160000   2.12871796
  0.18160000   2.54925167
  0.18160000   2.12871877
  0.18160000   2.54924957
  0.18160000   2.12871949
  0.18160000   2.54924767
  0.18160000   2.12872012
  0.18160000   2.54924596
  0.18160000   2.12872070
  0.18160000   2.54924439
  0.18180000   2.12666396
  0.18180000   2.55033742
  0.18180000   2.12666646
  0.18180000   2.55033218
  0.18180000   2.12666849
  0.18180000   2.55032772
  0.18180000   2.12667016
  0.18180000   2.55032387
  0.18180000   2.12667158
  0.18180000   2.55032052
  0.18180000   2.12667279
  0.18180000   2.55031758
  0.18180000   2.12667383
  0.18180000   2.55031497
  0.18180000   2.12667473
  0.18180000   2.55031264
  0.18180000   2.12667553
  0.18180000   2.55031055
  0.18180000   2.12667623
  0.18180000   2.55030867
  0.18180000   2.12667686
  0.18180000   2.55030696
  0.18180000   2.12667742
  0.18180000   2.55030540
  0.18200000   2.12463167
  0.18200000   2.55138817
  0.18200000   2.12463412
  0.18200000   2.55138297
  0.18200000   2.12463610
  0.18200000   2.55137853
  0.18200000   2.12463775
  0.18200000   2.55137471
  0.18200000   2.12463914
  0.18200000   2.55137137
  0.18200000   2.12464033
  0.18200000   2.55136844
  0.18200000   2.12464135
  0.18200000   2.55136585
  0.18200000   2.12464224
  0.18200000   2.55136353
  0.18200000   2.12464302
  0.18200000   2.55136145
  0.18200000   2.12464372
  0.18200000   2.55135958
  0.18200000   2.12464433
  0.18200000   2.55135787
  0.18200000   2.12464489
  0.18200000   2.55135632
  0.18220000   2.12260988
  0.18220000   2.55242907
  0.18220000   2.12261227
  0.18220000   2.55242389
  0.18220000   2.12261423
  0.18220000   2.55241948
  0.18220000   2.12261585
  0.18220000   2.55241568
  0.18220000   2.12261721
  0.18220000   2.55241236
  0.18220000   2.12261838
  0.18220000   2.55240944
  0.18220000   2.12261938
  0.18220000   2.55240686
  0.18220000   2.12262026
  0.18220000   2.55240456
  0.18220000   2.12262103
  0.18220000   2.55240249
  0.18220000   2.12262171
  0.18220000   2.55240062
  0.18220000   2.12262231
  0.18220000   2.55239892
  0.18220000   2.12262286
  0.18220000   2.55239738
  0.18240000   2.12059837
  0.18240000   2.55346032
  0.18240000   2.12060073
  0.18240000   2.55345517
  0.18240000   2.12060264
  0.18240000   2.55345078
  0.18240000   2.12060424
  0.18240000   2.55344699
  0.18240000   2.12060558
  0.18240000   2.55344370
  0.18240000   2.12060672
  0.18240000   2.55344079
  0.18240000   2.12060770
  0.18240000   2.55343822
  0.18240000   2.12060856
  0.18240000   2.55343593
  0.18240000   2.12060932
  0.18240000   2.55343387
  0.18240000   2.12060999
  0.18240000   2.55343201
  0.18240000   2.12061059
  0.18240000   2.55343032
  0.18240000   2.12061112
  0.18240000   2.55342878
  0.18260000   2.11859695
  0.18260000   2.55448214
  0.18260000   2.11859926
  0.18260000   2.55447701
  0.18260000   2.11860114
  0.18260000   2.55447265
  0.18260000   2.11860271
  0.18260000   2.55446887
  0.18260000   2.11860402
  0.18260000   2.55446559
  0.18260000   2.11860514
  0.18260000   2.55446270
  0.18260000   2.11860611
  0.18260000   2.55446015
  0.18260000   2.11860696
  0.18260000   2.55445786
  0.18260000   2.11860770
  0.18260000   2.55445581
  0.18260000   2.11860836
  0.18260000   2.55445396
  0.18260000   2.11860894
  0.18260000   2.55445228
  0.18260000   2.11860947
  0.18260000   2.55445075
  0.18280000   2.11660541
  0.18280000   2.55549471
  0.18280000   2.11660767
  0.18280000   2.55548961
  0.18280000   2.11660952
  0.18280000   2.55548526
  0.18280000   2.11661105
  0.18280000   2.55548152
  0.18280000   2.11661235
  0.18280000   2.55547825
  0.18280000   2.11661345
  0.18280000   2.55547537
  0.18280000   2.11661441
  0.18280000   2.55547283
  0.18280000   2.11661524
  0.18280000   2.55547055
  0.18280000   2.11661597
  0.18280000   2.55546851
  0.18280000   2.11661661
  0.18280000   2.55546667
  0.18280000   2.11661719
  0.18280000   2.55546499
  0.18280000   2.11661771
  0.18280000   2.55546347
  0.18300000   2.11462355
  0.18300000   2.55649824
  0.18300000   2.11462577
  0.18300000   2.55649317
  0.18300000   2.11462759
  0.18300000   2.55648884
  0.18300000   2.11462910
  0.18300000   2.55648511
  0.18300000   2.11463037
  0.18300000   2.55648186
  0.18300000   2.11463145
  0.18300000   2.55647899
  0.18300000   2.11463239
  0.18300000   2.55647646
  0.18300000   2.11463321
  0.18300000   2.55647420
  0.18300000   2.11463393
  0.18300000   2.55647216
  0.18300000   2.11463456
  0.18300000   2.55647033
  0.18300000   2.11463513
  0.18300000   2.55646866
  0.18300000   2.11463564
  0.18300000   2.55646714
  0.18320000   2.11265119
  0.18320000   2.55749291
  0.18320000   2.11265338
  0.18320000   2.55748786
  0.18320000   2.11265516
  0.18320000   2.55748356
  0.18320000   2.11265664
  0.18320000   2.55747984
  0.18320000   2.11265789
  0.18320000   2.55747660
  0.18320000   2.11265896
  0.18320000   2.55747376
  0.18320000   2.11265988
  0.18320000   2.55747123
  0.18320000   2.11266068
  0.18320000   2.55746898
  0.18320000   2.11266139
  0.18320000   2.55746695
  0.18320000   2.11266201
  0.18320000   2.55746512
  0.18320000   2.11266257
  0.18320000   2.55746346
  0.18320000   2.11266307
  0.18320000   2.55746195
  0.18340000   2.11068815
  0.18340000   2.55847890
  0.18340000   2.11069030
  0.18340000   2.55847388
  0.18340000   2.11069205
  0.18340000   2.55846960
  0.18340000   2.11069351
  0.18340000   2.55846590
  0.18340000   2.11069473
  0.18340000   2.55846268
  0.18340000   2.11069579
  0.18340000   2.55845984
  0.18340000   2.11069669
  0.18340000   2.55845733
  0.18340000   2.11069748
  0.18340000   2.55845508
  0.18340000   2.11069817
  0.18340000   2.55845306
  0.18340000   2.11069879
  0.18340000   2.55845124
  0.18340000   2.11069934
  0.18340000   2.55844959
  0.18340000   2.11069983
  0.18340000   2.55844808
  0.18360000   2.10873425
  0.18360000   2.55945639
  0.18360000   2.10873636
  0.18360000   2.55945140
  0.18360000   2.10873809
  0.18360000   2.55944713
  0.18360000   2.10873952
  0.18360000   2.55944345
  0.18360000   2.10874073
  0.18360000   2.55944024
  0.18360000   2.10874176
  0.18360000   2.55943742
  0.18360000   2.10874265
  0.18360000   2.55943492
  0.18360000   2.10874342
  0.18360000   2.55943268
  0.18360000   2.10874411
  0.18360000   2.55943067
  0.18360000   2.10874471
  0.18360000   2.55942886
  0.18360000   2.10874525
  0.18360000   2.55942721
  0.18360000   2.10874573
  0.18360000   2.55942570
  0.18380000   2.10678933
  0.18380000   2.56042556
  0.18380000   2.10679141
  0.18380000   2.56042058
  0.18380000   2.10679310
  0.18380000   2.56041634
  0.18380000   2.10679451
  0.18380000   2.56041267
  0.18380000   2.10679569
  0.18380000   2.56040948
  0.18380000   2.10679671
  0.18380000   2.56040667
  0.18380000   2.10679758
  0.18380000   2.56040417
  0.18380000   2.10679835
  0.18380000   2.56040194
  0.18380000   2.10679902
  0.18380000   2.56039994
  0.18380000   2.10679961
  0.18380000   2.56039813
  0.18380000   2.10680014
  0.18380000   2.56039650
  0.18380000   2.10680062
  0.18380000   2.56039500
  0.18400000   2.10485322
  0.18400000   2.56138655
  0.18400000   2.10485526
  0.18400000   2.56138160
  0.18400000   2.10485692
  0.18400000   2.56137738
  0.18400000   2.10485831
  0.18400000   2.56137373
  0.18400000   2.10485947
  0.18400000   2.56137054
  0.18400000   2.10486047
  0.18400000   2.56136774
  0.18400000   2.10486133
  0.18400000   2.56136526
  0.18400000   2.10486208
  0.18400000   2.56136304
  0.18400000   2.10486274
  0.18400000   2.56136105
  0.18400000   2.10486333
  0.18400000   2.56135925
  0.18400000   2.10486385
  0.18400000   2.56135761
  0.18400000   2.10486432
  0.18400000   2.56135612
  0.18420000   2.10292576
  0.18420000   2.56233954
  0.18420000   2.10292776
  0.18420000   2.56233461
  0.18420000   2.10292940
  0.18420000   2.56233040
  0.18420000   2.10293076
  0.18420000   2.56232677
  0.18420000   2.10293191
  0.18420000   2.56232360
  0.18420000   2.10293289
  0.18420000   2.56232081
  0.18420000   2.10293374
  0.18420000   2.56231834
  0.18420000   2.10293448
  0.18420000   2.56231613
  0.18420000   2.10293512
  0.18420000   2.56231414
  0.18420000   2.10293570
  0.18420000   2.56231234
  0.18420000   2.10293621
  0.18420000   2.56231071
  0.18420000   2.10293667
  0.18420000   2.56230923
  0.18440000   2.10100680
  0.18440000   2.56328467
  0.18440000   2.10100876
  0.18440000   2.56327977
  0.18440000   2.10101037
  0.18440000   2.56327558
  0.18440000   2.10101171
  0.18440000   2.56327196
  0.18440000   2.10101284
  0.18440000   2.56326880
  0.18440000   2.10101381
  0.18440000   2.56326602
  0.18440000   2.10101464
  0.18440000   2.56326356
  0.18440000   2.10101537
  0.18440000   2.56326135
  0.18440000   2.10101600
  0.18440000   2.56325938
  0.18440000   2.10101657
  0.18440000   2.56325759
  0.18440000   2.10101707
  0.18440000   2.56325597
  0.18440000   2.10101753
  0.18440000   2.56325448
  0.18460000   2.09909618
  0.18460000   2.56422210
  0.18460000   2.09909811
  0.18460000   2.56421722
  0.18460000   2.09909969
  0.18460000   2.56421305
  0.18460000   2.09910101
  0.18460000   2.56420944
  0.18460000   2.09910212
  0.18460000   2.56420630
  0.18460000   2.09910307
  0.18460000   2.56420353
  0.18460000   2.09910389
  0.18460000   2.56420107
  0.18460000   2.09910461
  0.18460000   2.56419888
  0.18460000   2.09910524
  0.18460000   2.56419691
  0.18460000   2.09910579
  0.18460000   2.56419513
  0.18460000   2.09910629
  0.18460000   2.56419351
  0.18460000   2.09910673
  0.18460000   2.56419203
  0.18480000   2.09719376
  0.18480000   2.56515197
  0.18480000   2.09719566
  0.18480000   2.56514711
  0.18480000   2.09719722
  0.18480000   2.56514296
  0.18480000   2.09719851
  0.18480000   2.56513937
  0.18480000   2.09719960
  0.18480000   2.56513624
  0.18480000   2.09720054
  0.18480000   2.56513348
  0.18480000   2.09720134
  0.18480000   2.56513103
  0.18480000   2.09720205
  0.18480000   2.56512885
  0.18480000   2.09720267
  0.18480000   2.56512688
  0.18480000   2.09720322
  0.18480000   2.56512511
  0.18480000   2.09720371
  0.18480000   2.56512349
  0.18480000   2.09720415
  0.18480000   2.56512202
  0.18500000   2.09529940
  0.18500000   2.56607443
  0.18500000   2.09530127
  0.18500000   2.56606959
  0.18500000   2.09530281
  0.18500000   2.56606545
  0.18500000   2.09530408
  0.18500000   2.56606188
  0.18500000   2.09530515
  0.18500000   2.56605876
  0.18500000   2.09530607
  0.18500000   2.56605601
  0.18500000   2.09530687
  0.18500000   2.56605357
  0.18500000   2.09530756
  0.18500000   2.56605139
  0.18500000   2.09530817
  0.18500000   2.56604944
  0.18500000   2.09530871
  0.18500000   2.56604767
  0.18500000   2.09530919
  0.18500000   2.56604606
  0.18500000   2.09530962
  0.18500000   2.56604459
  0.18520000   2.09341297
  0.18520000   2.56698960
  0.18520000   2.09341481
  0.18520000   2.56698478
  0.18520000   2.09341631
  0.18520000   2.56698066
  0.18520000   2.09341757
  0.18520000   2.56697710
  0.18520000   2.09341863
  0.18520000   2.56697400
  0.18520000   2.09341953
  0.18520000   2.56697126
  0.18520000   2.09342031
  0.18520000   2.56696883
  0.18520000   2.09342100
  0.18520000   2.56696666
  0.18520000   2.09342159
  0.18520000   2.56696471
  0.18520000   2.09342212
  0.18520000   2.56696294
  0.18520000   2.09342260
  0.18520000   2.56696134
  0.18520000   2.09342302
  0.18520000   2.56695988
  0.18540000   2.09153433
  0.18540000   2.56789763
  0.18540000   2.09153614
  0.18540000   2.56789283
  0.18540000   2.09153762
  0.18540000   2.56788873
  0.18540000   2.09153885
  0.18540000   2.56788518
  0.18540000   2.09153989
  0.18540000   2.56788209
  0.18540000   2.09154078
  0.18540000   2.56787936
  0.18540000   2.09154155
  0.18540000   2.56787694
  0.18540000   2.09154222
  0.18540000   2.56787478
  0.18540000   2.09154282
  0.18540000   2.56787283
  0.18540000   2.09154334
  0.18540000   2.56787107
  0.18540000   2.09154380
  0.18540000   2.56786947
  0.18540000   2.09154422
  0.18540000   2.56786802
  0.18560000   2.08966335
  0.18560000   2.56879865
  0.18560000   2.08966513
  0.18560000   2.56879386
  0.18560000   2.08966659
  0.18560000   2.56878978
  0.18560000   2.08966780
  0.18560000   2.56878624
  0.18560000   2.08966883
  0.18560000   2.56878316
  0.18560000   2.08966970
  0.18560000   2.56878044
  0.18560000   2.08967046
  0.18560000   2.56877803
  0.18560000   2.08967112
  0.18560000   2.56877587
  0.18560000   2.08967170
  0.18560000   2.56877393
  0.18560000   2.08967221
  0.18560000   2.56877218
  0.18560000   2.08967267
  0.18560000   2.56877059
  0.18560000   2.08967309
  0.18560000   2.56876914
  0.18580000   2.08779991
  0.18580000   2.56969277
  0.18580000   2.08780166
  0.18580000   2.56968800
  0.18580000   2.08780309
  0.18580000   2.56968393
  0.18580000   2.08780429
  0.18580000   2.56968041
  0.18580000   2.08780530
  0.18580000   2.56967734
  0.18580000   2.08780616
  0.18580000   2.56967463
  0.18580000   2.08780690
  0.18580000   2.56967222
  0.18580000   2.08780755
  0.18580000   2.56967007
  0.18580000   2.08780812
  0.18580000   2.56966814
  0.18580000   2.08780863
  0.18580000   2.56966640
  0.18580000   2.08780908
  0.18580000   2.56966481
  0.18580000   2.08780949
  0.18580000   2.56966336
  0.18600000   2.08594388
  0.18600000   2.57058011
  0.18600000   2.08594561
  0.18600000   2.57057537
  0.18600000   2.08594702
  0.18600000   2.57057131
  0.18600000   2.08594819
  0.18600000   2.57056781
  0.18600000   2.08594918
  0.18600000   2.57056474
  0.18600000   2.08595003
  0.18600000   2.57056204
  0.18600000   2.08595076
  0.18600000   2.57055965
  0.18600000   2.08595140
  0.18600000   2.57055750
  0.18600000   2.08595197
  0.18600000   2.57055558
  0.18600000   2.08595247
  0.18600000   2.57055384
  0.18600000   2.08595291
  0.18600000   2.57055226
  0.18600000   2.08595331
  0.18600000   2.57055082
  0.18620000   2.08409515
  0.18620000   2.57146081
  0.18620000   2.08409685
  0.18620000   2.57145608
  0.18620000   2.08409824
  0.18620000   2.57145205
  0.18620000   2.08409939
  0.18620000   2.57144855
  0.18620000   2.08410037
  0.18620000   2.57144550
  0.18620000   2.08410120
  0.18620000   2.57144281
  0.18620000   2.08410192
  0.18620000   2.57144042
  0.18620000   2.08410256
  0.18620000   2.57143829
  0.18620000   2.08410311
  0.18620000   2.57143637
  0.18620000   2.08410360
  0.18620000   2.57143463
  0.18620000   2.08410404
  0.18620000   2.57143305
  0.18620000   2.08410443
  0.18620000   2.57143161
  0.18640000   2.08225360
  0.18640000   2.57233497
  0.18640000   2.08225527
  0.18640000   2.57233026
  0.18640000   2.08225663
  0.18640000   2.57232624
  0.18640000   2.08225777
  0.18640000   2.57232276
  0.18640000   2.08225874
  0.18640000   2.57231971
  0.18640000   2.08225956
  0.18640000   2.57231703
  0.18640000   2.08226027
  0.18640000   2.57231466
  0.18640000   2.08226089
  0.18640000   2.57231253
  0.18640000   2.08226143
  0.18640000   2.57231061
  0.18640000   2.08226192
  0.18640000   2.57230888
  0.18640000   2.08226235
  0.18640000   2.57230731
  0.18640000   2.08226274
  0.18640000   2.57230588
  0.18660000   2.08041912
  0.18660000   2.57320271
  0.18660000   2.08042077
  0.18660000   2.57319802
  0.18660000   2.08042211
  0.18660000   2.57319401
  0.18660000   2.08042323
  0.18660000   2.57319054
  0.18660000   2.08042417
  0.18660000   2.57318751
  0.18660000   2.08042498
  0.18660000   2.57318484
  0.18660000   2.08042569
  0.18660000   2.57318246
  0.18660000   2.08042629
  0.18660000   2.57318034
  0.18660000   2.08042683
  0.18660000   2.57317844
  0.18660000   2.08042731
  0.18660000   2.57317671
  0.18660000   2.08042773
  0.18660000   2.57317514
  0.18660000   2.08042811
  0.18660000   2.57317372
  0.18680000   2.07859159
  0.18680000   2.57406413
  0.18680000   2.07859322
  0.18680000   2.57405946
  0.18680000   2.07859454
  0.18680000   2.57405547
  0.18680000   2.07859565
  0.18680000   2.57405201
  0.18680000   2.07859658
  0.18680000   2.57404899
  0.18680000   2.07859737
  0.18680000   2.57404633
  0.18680000   2.07859806
  0.18680000   2.57404396
  0.18680000   2.07859866
  0.18680000   2.57404184
  0.18680000   2.07859919
  0.18680000   2.57403994
  0.18680000   2.07859966
  0.18680000   2.57403822
  0.18680000   2.07860008
  0.18680000   2.57403666
  0.18680000   2.07860045
  0.18680000   2.57403524
  0.18700000   2.07677092
  0.18700000   2.57491935
  0.18700000   2.07677253
  0.18700000   2.57491470
  0.18700000   2.07677383
  0.18700000   2.57491071
  0.18700000   2.07677491
  0.18700000   2.57490727
  0.18700000   2.07677583
  0.18700000   2.57490426
  0.18700000   2.07677662
  0.18700000   2.57490160
  0.18700000   2.07677730
  0.18700000   2.57489924
  0.18700000   2.07677789
  0.18700000   2.57489714
  0.18700000   2.07677841
  0.18700000   2.57489524
  0.18700000   2.07677887
  0.18700000   2.57489353
  0.18700000   2.07677928
  0.18700000   2.57489197
  0.18700000   2.07677965
  0.18700000   2.57489055
  0.18720000   2.07495700
  0.18720000   2.57576846
  0.18720000   2.07495859
  0.18720000   2.57576383
  0.18720000   2.07495987
  0.18720000   2.57575986
  0.18720000   2.07496094
  0.18720000   2.57575643
  0.18720000   2.07496184
  0.18720000   2.57575342
  0.18720000   2.07496261
  0.18720000   2.57575078
  0.18720000   2.07496328
  0.18720000   2.57574842
  0.18720000   2.07496387
  0.18720000   2.57574632
  0.18720000   2.07496438
  0.18720000   2.57574444
  0.18720000   2.07496483
  0.18720000   2.57574272
  0.18720000   2.07496524
  0.18720000   2.57574117
  0.18720000   2.07496560
  0.18720000   2.57573975
  0.18740000   2.07314972
  0.18740000   2.57661157
  0.18740000   2.07315131
  0.18740000   2.57660695
  0.18740000   2.07315256
  0.18740000   2.57660300
  0.18740000   2.07315361
  0.18740000   2.57659958
  0.18740000   2.07315450
  0.18740000   2.57659658
  0.18740000   2.07315526
  0.18740000   2.57659395
  0.18740000   2.07315592
  0.18740000   2.57659160
  0.18740000   2.07315649
  0.18740000   2.57658951
  0.18740000   2.07315700
  0.18740000   2.57658762
  0.18740000   2.07315745
  0.18740000   2.57658592
  0.18740000   2.07315785
  0.18740000   2.57658437
  0.18740000   2.07315821
  0.18740000   2.57658296
  0.18760000   2.07134900
  0.18760000   2.57744877
  0.18760000   2.07135057
  0.18760000   2.57744417
  0.18760000   2.07135180
  0.18760000   2.57744023
  0.18760000   2.07135284
  0.18760000   2.57743682
  0.18760000   2.07135371
  0.18760000   2.57743384
  0.18760000   2.07135446
  0.18760000   2.57743121
  0.18760000   2.07135511
  0.18760000   2.57742888
  0.18760000   2.07135568
  0.18760000   2.57742679
  0.18760000   2.07135617
  0.18760000   2.57742491
  0.18760000   2.07135662
  0.18760000   2.57742321
  0.18760000   2.07135701
  0.18760000   2.57742166
  0.18760000   2.07135736
  0.18760000   2.57742025
  0.18780000   2.06955475
  0.18780000   2.57828016
  0.18780000   2.06955629
  0.18780000   2.57827559
  0.18780000   2.06955750
  0.18780000   2.57827166
  0.18780000   2.06955852
  0.18780000   2.57826826
  0.18780000   2.06955938
  0.18780000   2.57826529
  0.18780000   2.06956012
  0.18780000   2.57826266
  0.18780000   2.06956076
  0.18780000   2.57826034
  0.18780000   2.06956132
  0.18780000   2.57825825
  0.18780000   2.06956181
  0.18780000   2.57825638
  0.18780000   2.06956224
  0.18780000   2.57825469
  0.18780000   2.06956263
  0.18780000   2.57825314
  0.18780000   2.06956298
  0.18780000   2.57825174
  0.18800000   2.06776687
  0.18800000   2.57910585
  0.18800000   2.06776837
  0.18800000   2.57910128
  0.18800000   2.06776956
  0.18800000   2.57909737
  0.18800000   2.06777057
  0.18800000   2.57909398
  0.18800000   2.06777142
  0.18800000   2.57909102
  0.18800000   2.06777215
  0.18800000   2.57908840
  0.18800000   2.06777277
  0.18800000   2.57908608
  0.18800000   2.06777332
  0.18800000   2.57908401
  0.18800000   2.06777380
  0.18800000   2.57908214
  0.18800000   2.06777423
  0.18800000   2.57908045
  0.18800000   2.06777461
  0.18800000   2.57907891
  0.18800000   2.06777496
  0.18800000   2.57907751
  0.18820000   2.06598531
  0.18820000   2.57992591
  0.18820000   2.06598671
  0.18820000   2.57992135
  0.18820000   2.06598791
  0.18820000   2.57991746
  0.18820000   2.06598889
  0.18820000   2.57991408
  0.18820000   2.06598973
  0.18820000   2.57991112
  0.18820000   2.06599044
  0.18820000   2.57990852
  0.18820000   2.06599106
  0.18820000   2.57990620
  0.18820000   2.06599160
  0.18820000   2.57990413
  0.18820000   2.06599208
  0.18820000   2.57990227
  0.18820000   2.06599250
  0.18820000   2.57990058
  0.18820000   2.06599287
  0.18820000   2.57989905
  0.18820000   2.06599321
  0.18820000   2.57989765
  0.18840000   2.06420998
  0.18840000   2.58074045
  0.18840000   2.06421121
  0.18840000   2.58073588
  0.18840000   2.06421244
  0.18840000   2.58073201
  0.18840000   2.06421339
  0.18840000   2.58072864
  0.18840000   2.06421422
  0.18840000   2.58072570
  0.18840000   2.06421492
  0.18840000   2.58072310
  0.18840000   2.06421553
  0.18840000   2.58072079
  0.18840000   2.06421607
  0.18840000   2.58071872
  0.18840000   2.06421653
  0.18840000   2.58071687
  0.18840000   2.06421695
  0.18840000   2.58071519
  0.18840000   2.06421732
  0.18840000   2.58071366
  0.18840000   2.06421765
  0.18840000   2.58071226
  0.18860000   2.06244085
  0.18860000   2.58154955
  0.18860000   2.06244178
  0.18860000   2.58154496
  0.18860000   2.06244308
  0.18860000   2.58154111
  0.18860000   2.06244399
  0.18860000   2.58153775
  0.18860000   2.06244482
  0.18860000   2.58153482
  0.18860000   2.06244550
  0.18860000   2.58153223
  0.18860000   2.06244610
  0.18860000   2.58152993
  0.18860000   2.06244663
  0.18860000   2.58152787
  0.18860000   2.06244709
  0.18860000   2.58152601
  0.18860000   2.06244750
  0.18860000   2.58152434
  0.18860000   2.06244786
  0.18860000   2.58152281
  0.18860000   2.06244819
  0.18860000   2.58152142
  0.18880000   2.06067790
  0.18880000   2.58235333
  0.18880000   2.06067829
  0.18880000   2.58234866
  0.18880000   2.06067976
  0.18880000   2.58234486
  0.18880000   2.06068059
  0.18880000   2.58234149
  0.18880000   2.06068143
  0.18880000   2.58233858
  0.18880000   2.06068209
  0.18880000   2.58233599
  0.18880000   2.06068269
  0.18880000   2.58233370
  0.18880000   2.06068320
  0.18880000   2.58233164
  0.18880000   2.06068366
  0.18880000   2.58232979
  0.18880000   2.06068406
  0.18880000   2.58232812
  0.18880000   2.06068442
  0.18880000   2.58232660
  0.18880000   2.06068474
  0.18880000   2.58232522
  0.18900000   2.05892112
  0.18900000   2.58315187
  0.18900000   2.05892065
  0.18900000   2.58314706
  0.18900000   2.05892240
  0.18900000   2.58314333
  0.18900000   2.05892310
  0.18900000   2.58313995
  0.18900000   2.05892397
  0.18900000   2.58313705
  0.18900000   2.05892462
  0.18900000   2.58313447
  0.18900000   2.05892521
  0.18900000   2.58313219
  0.18900000   2.05892571
  0.18900000   2.58313014
  0.18900000   2.05892616
  0.18900000   2.58312830
  0.18900000   2.05892656
  0.18900000   2.58312663
  0.18900000   2.05892691
  0.18900000   2.58312511
  0.18900000   2.05892723
  0.18900000   2.58312373
  0.18920000   2.05717056
  0.18920000   2.58394528
  0.18920000   2.05716871
  0.18920000   2.58394023
  0.18920000   2.05717096
  0.18920000   2.58393661
  0.18920000   2.05717145
  0.18920000   2.58393321
  0.18920000   2.05717238
  0.18920000   2.58393033
  0.18920000   2.05717298
  0.18920000   2.58392775
  0.18920000   2.05717358
  0.18920000   2.58392547
  0.18920000   2.05717407
  0.18920000   2.58392343
  0.18920000   2.05717451
  0.18920000   2.58392160
  0.18920000   2.05717490
  0.18920000   2.58391993
  0.18920000   2.05717525
  0.18920000   2.58391842
  0.18920000   2.05717556
  0.18920000   2.58391704
  0.18940000   2.05542631
  0.18940000   2.58473368
  0.18940000   2.05542231
  0.18940000   2.58472824
  0.18940000   2.05542538
  0.18940000   2.58472479
  0.18940000   2.05542553
  0.18940000   2.58472134
  0.18940000   2.05542657
  0.18940000   2.58471849
  0.18940000   2.05542712
  0.18940000   2.58471591
  0.18940000   2.05542773
  0.18940000   2.58471365
  0.18940000   2.05542820
  0.18940000   2.58471161
  0.18940000   2.05542864
  0.18940000   2.58470978
  0.18940000   2.05542902
  0.18940000   2.58470811
  0.18940000   2.05542937
  0.18940000   2.58470661
  0.18940000   2.05542967
  0.18940000   2.58470523
  0.18960000   2.05368849
  0.18960000   2.58551719
  0.18960000   2.05368129
  0.18960000   2.58551113
  0.18960000   2.05368563
  0.18960000   2.58550795
  0.18960000   2.05368525
  0.18960000   2.58550441
  0.18960000   2.05368649
  0.18960000   2.58550161
  0.18960000   2.05368694
  0.18960000   2.58549902
  0.18960000   2.05368757
  0.18960000   2.58549677
  0.18960000   2.05368803
  0.18960000   2.58549473
  0.18960000   2.05368847
  0.18960000   2.58549291
  0.18960000   2.05368884
  0.18960000   2.58549125
  0.18960000   2.05368918
  0.18960000   2.58548975
  0.18960000   2.05368948
  0.18960000   2.58548837
  0.18980000   2.05195729
  0.18980000   2.58629595
  0.18980000   2.05194545
  0.18980000   2.58628896
  0.18980000   2.05195169
  0.18980000   2.58628618
  0.18980000   2.05195051
  0.18980000   2.58628249
  0.18980000   2.05195206
  0.18980000   2.58627977
  0.18980000   2.05195237
  0.18980000   2.58627716
  0.18980000   2.05195304
  0.18980000   2.58627492
  0.18980000   2.05195347
  0.18980000   2.58627289
  0.18980000   2.05195391
  0.18980000   2.58627107
  0.18980000   2.05195428
  0.18980000   2.58626942
  0.18980000   2.05195461
  0.18980000   2.58626792
  0.18980000   2.05195491
  0.18980000   2.58626655
  0.19000000   2.05023293
  0.19000000   2.58707011
  0.19000000   2.05021456
  0.19000000   2.58706175
  0.19000000   2.05022358
  0.19000000   2.58705958
  0.19000000   2.05022118
  0.19000000   2.58705565
  0.19000000   2.05022324
  0.19000000   2.58705304
  0.19000000   2.05022332
  0.19000000   2.58705039
  0.19000000   2.05022408
  0.19000000   2.58704818
  0.19000000   2.05022446
  0.19000000   2.58704615
  0.19000000   2.05022491
  0.19000000   2.58704434
  0.19000000   2.05022526
  0.19000000   2.58704269
  0.19000000   2.05022559
  0.19000000   2.58704119
  0.19000000   2.05022588
  0.19000000   2.58703983
  0.19020000   2.04851564
  0.19020000   2.58783981
  0.19020000   2.04848838
  0.19020000   2.58782954
  0.19020000   2.04850131
  0.19020000   2.58782824
  0.19020000   2.04849717
  0.19020000   2.58782394
  0.19020000   2.04849997
  0.19020000   2.58782151
  0.19020000   2.04849971
  0.19020000   2.58781880
  0.19020000   2.04850060
  0.19020000   2.58781662
  0.19020000   2.04850091
  0.19020000   2.58781458
  0.19020000   2.04850139
  0.19020000   2.58781278
  0.19020000   2.04850172
  0.19020000   2.58781113
  0.19020000   2.04850205
  0.19020000   2.58780964
  0.19020000   2.04850234
  0.19020000   2.58780828
  0.19040000   2.04680558
  0.19040000   2.58860521
  0.19040000   2.04676668
  0.19040000   2.58859236
  0.19040000   2.04678490
  0.19040000   2.58859225
  0.19040000   2.04677834
  0.19040000   2.58858743
  0.19040000   2.04678221
  0.19040000   2.58858525
  0.19040000   2.04678145
  0.19040000   2.58858244
  0.19040000   2.04678256
  0.19040000   2.58858032
  0.19040000   2.04678277
  0.19040000   2.58857825
  0.19040000   2.04678328
  0.19040000   2.58857647
  0.19040000   2.04678359
  0.19040000   2.58857482
  0.19040000   2.04678392
  0.19040000   2.58857334
  0.19040000   2.04678420
  0.19040000   2.58857198
  0.19060000   2.04510278
  0.19060000   2.58936642
  0.19060000   2.04504931
  0.19060000   2.58935023
  0.19060000   2.04507434
  0.19060000   2.58935171
  0.19060000   2.04506457
  0.19060000   2.58934616
  0.19060000   2.04506993
  0.19060000   2.58934433
  0.19060000   2.04506847
  0.19060000   2.58934137
  0.19060000   2.04506989
  0.19060000   2.58933933
  0.19060000   2.04506994
  0.19060000   2.58933724
  0.19060000   2.04507051
  0.19060000   2.58933547
  0.19060000   2.04507078
  0.19060000   2.58933382
  0.19060000   2.04507113
  0.19060000   2.58933235
  0.19060000   2.04507140
  0.19060000   2.58933099
  0.19080000   2.04340688
  0.19080000   2.59012347
  0.19080000   2.04333626
  0.19080000   2.59010322
  0.19080000   2.04336960
  0.19080000   2.59010668
  0.19080000   2.04335580
  0.19080000   2.59010021
  0.19080000   2.04336307
  0.19080000   2.59009883
  0.19080000   2.04336068
  0.19080000   2.59009567
  0.19080000   2.04336253
  0.19080000   2.59009374
  0.19080000   2.04336236
  0.19080000   2.59009161
  0.19080000   2.04336303
  0.19080000   2.59008987
  0.19080000   2.04336325
  0.19080000   2.59008821
  0.19080000   2.04336361
  0.19080000   2.59008674
  0.19080000   2.04336386
  0.19080000   2.59008538
  0.19100000   2.04171697
  0.19100000   2.59087626
  0.19100000   2.04162780
  0.19100000   2.59085147
  0.19100000   2.04167046
  0.19100000   2.59085722
  0.19100000   2.04165198
  0.19100000   2.59084963
  0.19100000   2.04166156
  0.19100000   2.59084882
  0.19100000   2.04165802
  0.19100000   2.59084539
  0.19100000   2.04166042
  0.19100000   2.59084360
  0.19100000   2.04165997
  0.19100000   2.59084141
  0.19100000   2.04166076
  0.19100000   2.59083971
  0.19100000   2.04166092
  0.19100000   2.59083804
  0.19100000   2.04166130
  0.19100000   2.59083658
  0.19100000   2.04166154
  0.19100000   2.59083522
  0.19120000   2.04003110
  0.19120000   2.59162443
  0.19120000   2.03992474
  0.19120000   2.59159523
  0.19120000   2.03997649
  0.19120000   2.59160331
  0.19120000   2.03995323
  0.19120000   2.59159453
  0.19120000   2.03996525
  0.19120000   2.59159434
  0.19120000   2.03996045
  0.19120000   2.59159061
  0.19120000   2.03996348
  0.19120000   2.59158898
  0.19120000   2.03996271
  0.19120000   2.59158672
  0.19120000   2.03996365
  0.19120000   2.59158506
  0.19120000   2.03996372
  0.19120000   2.59158338
  0.19120000   2.03996414
  0.19120000   2.59158194
  0.19120000   2.03996435
  0.19120000   2.59158057
  0.19140000   2.03834583
  0.19140000   2.59236721
  0.19140000   2.03822869
  0.19140000   2.59233495
  0.19140000   2.03828678
  0.19140000   2.59234481
  0.19140000   2.03825988
  0.19140000   2.59233506
  0.19140000   2.03827391
  0.19140000   2.59233542
  0.19140000   2.03826800
  0.19140000   2.59233141
  0.19140000   2.03827161
  0.19140000   2.59232994
  0.19140000   2.03827052
  0.19140000   2.59232760
  0.19140000   2.03827162
  0.19140000   2.59232599
  0.19140000   2.03827160
  0.19140000   2.59232429
  0.19140000   2.03827206
  0.19140000   2.59232286
  0.19140000   2.03827224
  0.19140000   2.59232150
  0.19160000   2.03665548
  0.19160000   2.59310325
  0.19160000   2.03654249
  0.19160000   2.59307144
  0.19160000   2.03659979
  0.19160000   2.59308140
  0.19160000   2.03657265
  0.19160000   2.59307148
  0.19160000   2.03658708
  0.19160000   2.59307201
  0.19160000   2.03658081
  0.19160000   2.59306790
  0.19160000   2.03658465
  0.19160000   2.59306651
  0.19160000   2.03658340
  0.19160000   2.59306413
  0.19160000   2.03658459
  0.19160000   2.59306255
  0.19160000   2.03658450
  0.19160000   2.59306084
  0.19160000   2.03658500
  0.19160000   2.59305942
  0.19160000   2.03658515
  0.19160000   2.59305806
  0.19180000   2.03495153
  0.19180000   2.59383039
  0.19180000   2.03487070
  0.19180000   2.59380597
  0.19180000   2.03491296
  0.19180000   2.59381252
  0.19180000   2.03489279
  0.19180000   2.59380419
  0.19180000   2.03490398
  0.19180000   2.59380401
  0.19180000   2.03489918
  0.19180000   2.59380022
  0.19180000   2.03490235
  0.19180000   2.59379870
  0.19180000   2.03490139
  0.19180000   2.59379639
  0.19180000   2.03490244
  0.19180000   2.59379479
  0.19180000   2.03490241
  0.19180000   2.59379310
  0.19180000   2.03490287
  0.19180000   2.59379168
  0.19180000   2.03490304
  0.19180000   2.59379032
  0.19200000   2.03322244
  0.19200000   2.59454550
  0.19200000   2.03321979
  0.19200000   2.59454036
  0.19200000   2.03322256
  0.19200000   2.59453721
  0.19200000   2.03322230
  0.19200000   2.59453380
  0.19200000   2.03322343
  0.19200000   2.59453115
  0.19200000   2.03322370
  0.19200000   2.59452863
  0.19200000   2.03322429
  0.19200000   2.59452648
  0.19200000   2.03322462
  0.19200000   2.59452449
  0.19200000   2.03322501
  0.19200000   2.59452274
  0.19200000   2.03322531
  0.19200000   2.59452113
  0.19200000   2.03322560
  0.19200000   2.59451967
  0.19200000   2.03322584
  0.19200000   2.59451834
  0.19220000   2.03145538
  0.19220000   2.59524492
  0.19220000   2.03159743
  0.19220000   2.59527689
  0.19220000   2.03152396
  0.19220000   2.59525423
  0.19220000   2.03156382
  0.19220000   2.59526112
  0.19220000   2.03154381
  0.19220000   2.59525307
  0.19220000   2.03155519
  0.19220000   2.59525340
  0.19220000   2.03154992
  0.19220000   2.59524976
  0.19220000   2.03155333
  0.19220000   2.59524857
  0.19220000   2.03155209
  0.19220000   2.59524641
  0.19220000   2.03155323
  0.19220000   2.59524503
  0.19220000   2.03155307
  0.19220000   2.59524346
  0.19220000   2.03155355
  0.19220000   2.59524219
  0.19240000   2.02964237
  0.19240000   2.59592596
  0.19240000   2.03000933
  0.19240000   2.59601743
  0.19240000   2.02981330
  0.19240000   2.59596246
  0.19240000   2.02991977
  0.19240000   2.59598695
  0.19240000   2.02986350
  0.19240000   2.59596935
  0.19240000   2.02989457
  0.19240000   2.59597489
  0.19240000   2.02987859
  0.19240000   2.59596844
  0.19240000   2.02988780
  0.19240000   2.59596879
  0.19240000   2.02988340
  0.19240000   2.59596580
  0.19240000   2.02988625
  0.19240000   2.59596487
  0.19240000   2.02988516
  0.19240000   2.59596306
  0.19240000   2.02988613
  0.19240000   2.59596193
  0.19260000   2.02779375
  0.19260000   2.59659064
  0.19260000   2.02845147
  0.19260000   2.59676139
  0.19260000   2.02809177
  0.19260000   2.59666203
  0.19260000   2.02828994
  0.19260000   2.59671145
  0.19260000   2.02818223
  0.19260000   2.59667992
  0.19260000   2.02824208
  0.19260000   2.59669328
  0.19260000   2.02820998
  0.19260000   2.59668246
  0.19260000   2.02822819
  0.19260000   2.59668526
  0.19260000   2.02821875
  0.19260000   2.59668092
  0.19260000   2.02822441
  0.19260000   2.59668075
  0.19260000   2.02822174
  0.19260000   2.59667853
  0.19260000   2.02822359
  0.19260000   2.59667763
  0.19280000   2.02596004
  0.19280000   2.59725217
  0.19280000   2.02689676
  0.19280000   2.59750187
  0.19280000   2.02637364
  0.19280000   2.59735665
  0.19280000   2.02666679
  0.19280000   2.59743277
  0.19280000   2.02650382
  0.19280000   2.59738579
  0.19280000   2.02659567
  0.19280000   2.59740811
  0.19280000   2.02654504
  0.19280000   2.59739214
  0.19280000   2.02657394
  0.19280000   2.59739793
  0.19280000   2.02655833
  0.19280000   2.59739187
  0.19280000   2.02656753
  0.19280000   2.59739270
  0.19280000   2.02656282
  0.19280000   2.59738992
  0.19280000   2.02656583
  0.19280000   2.59738935
  0.19300000   2.02426122
  0.19300000   2.59794417
  0.19300000   2.02527574
  0.19300000   2.59821987
  0.19300000   2.02469819
  0.19300000   2.59805722
  0.19300000   2.02502782
  0.19300000   2.59814482
  0.19300000   2.02484094
  0.19300000   2.59809050
  0.19300000   2.02494812
  0.19300000   2.59811750
  0.19300000   2.02488777
  0.19300000   2.59809862
  0.19300000   2.02492274
  0.19300000   2.59810622
  0.19300000   2.02490336
  0.19300000   2.59809906
  0.19300000   2.02491486
  0.19300000   2.59810057
  0.19300000   2.02490873
  0.19300000   2.59809738
  0.19300000   2.02491260
  0.19300000   2.59809707
  0.19320000   2.02292450
  0.19320000   2.59873269
  0.19320000   2.02345143
  0.19320000   2.59887622
  0.19320000   2.02314675
  0.19320000   2.59878720
  0.19320000   2.02332447
  0.19320000   2.59883378
  0.19320000   2.02322227
  0.19320000   2.59880231
  0.19320000   2.02328233
  0.19320000   2.59881662
  0.19320000   2.02324817
  0.19320000   2.59880481
  0.19320000   2.02326858
  0.19320000   2.59880851
  0.19320000   2.02325727
  0.19320000   2.59880353
  0.19320000   2.02326430
  0.19320000   2.59880385
  0.19320000   2.02326064
  0.19320000   2.59880132
  0.19320000   2.02326313
  0.19340000   2.02222399
  0.19340000   2.59969915
  0.19340000   2.02125412
  0.19340000   2.59941907
  0.19340000   2.02182729
  0.19340000   2.59957890
  0.19340000   2.02148947
  0.19340000   2.59947951
  0.19340000   2.02168979
  0.19340000   2.59953378
  0.19340000   2.02157222
  0.19340000   2.59949779
  0.19340000   2.02164231
  0.19340000   2.59951553
  0.19340000   2.02160150
  0.19340000   2.59950190
  0.19340000   2.02162612
  0.19340000   2.59950711
  0.19340000   2.02161204
  0.19340000   2.59950146
  0.19340000   2.02162077
  0.19340000   2.59950246
  0.19340000   2.02161598
  0.19360000   2.02175210
  0.19360000   2.60073064
  0.19360000   2.01891645
  0.19360000   2.59990918
  0.19360000   2.02061457
  0.19360000   2.60039876
  0.19360000   2.01959192
  0.19360000   2.60009994
  0.19360000   2.02020658
  0.19360000   2.60027534
  0.19360000   2.01983746
  0.19360000   2.60016604
  0.19360000   2.02005989
  0.19360000   2.60022827
  0.19360000   2.01992671
  0.19360000   2.60018772
  0.19360000   2.02000726
  0.19360000   2.60020926
  0.19360000   2.01995929
  0.19360000   2.60019374
  0.19360000   2.01998853
  0.19360000   2.60020072
  0.19360000   2.01997131
  0.19380000   2.01882228
  0.19380000   2.60105538
  0.19380000   2.01804287
  0.19380000   2.60082233
  0.19380000   2.01852022
  0.19380000   2.60095943
  0.19380000   2.01822897
  0.19380000   2.60087067
  0.19380000   2.01840790
  0.19380000   2.60092060
  0.19380000   2.01829915
  0.19380000   2.60088617
  0.19380000   2.01836631
  0.19380000   2.60090375
  0.19380000   2.01832579
  0.19380000   2.60088986
  0.19380000   2.01835107
  0.19380000   2.60089553
  0.19380000   2.01833605
  0.19380000   2.60088949
  0.19380000   2.01834564
  0.19380000   2.60089084
  0.19380000   2.01834013
  0.19400000   2.01336708
  0.19400000   2.60058110
  0.19400000   2.01882884
  0.19400000   2.60222293
  0.19400000   2.01540554
  0.19400000   2.60120161
  0.19400000   2.01752565
  0.19400000   2.60183441
  0.19400000   2.01620327
  0.19400000   2.60143724
  0.19400000   2.01702517
  0.19400000   2.60168085
  0.19400000   2.01651380
  0.19400000   2.60152598
  0.19400000   2.01683227
  0.19400000   2.60161929
  0.19400000   2.01663452
  0.19400000   2.60155846
  0.19400000   2.01675795
  0.19400000   2.60159377
  0.19400000   2.01668153
  0.19400000   2.60156947
  0.19400000   2.01672942
  0.19400000   2.60158246
  0.19420000   2.00527831
  0.19420000   2.59912367
  0.19420000   2.02165250
  0.19420000   2.60419164
  0.19420000   2.01109255
  0.19420000   2.60103598
  0.19420000   2.01766754
  0.19420000   2.60304700
  0.19420000   2.01347273
  0.19420000   2.60177917
  0.19420000   2.01611133
  0.19420000   2.60258092
  0.19420000   2.01443657
  0.19420000   2.60207182
  0.19420000   2.01549411
  0.19420000   2.60239150
  0.19420000   2.01482453
  0.19420000   2.60218681
  0.19420000   2.01524813
  0.19420000   2.60231395
  0.19420000   2.01498036
  0.19420000   2.60223131
  0.19420000   2.01515002
  0.19420000   2.60228154
  0.19440000   2.60302539
  0.19440000   2.01333637
  0.19440000   2.60292634
  0.19440000   2.01353733
  0.19440000   2.60298526
  0.19440000   2.01340869
  0.19440000   2.60294277
  0.19440000   2.01349209
  0.19440000   2.60296585
  0.19440000   2.01343910
  0.19440000   2.60294713
  0.19440000   2.01347377
  0.19440000   2.60295565
  0.19440000   2.01345201
  0.19440000   2.60294698
  0.19440000   2.01346649
  0.19440000   2.60294966
  0.19440000   2.01345761
  0.19440000   2.60294529
  0.19440000   2.01346371
  0.19440000   2.60294569
  0.19440000   2.01346014
  0.19440000   2.60294323
  0.19440000   2.01346276
  0.19460000   2.60237714
  0.19460000   2.01449148
  0.19460000   2.60445943
  0.19460000   2.01013379
  0.19460000   2.60310066
  0.19460000   2.01296711
  0.19460000   2.60398678
  0.19460000   2.01110975
  0.19460000   2.60340441
  0.19460000   2.01232162
  0.19460000   2.60378148
  0.19460000   2.01152905
  0.19460000   2.60353159
  0.19460000   2.01204711
  0.19460000   2.60369168
  0.19460000   2.01170883
  0.19460000   2.60358409
  0.19460000   2.01193027
  0.19460000   2.60365169
  0.19460000   2.01178591
  0.19460000   2.60360503
  0.19460000   2.01188059
  0.19460000   2.60363326
  0.19460000   2.01181904
  0.19480000   2.60399193
  0.19480000   2.01091577
  0.19480000   2.60453627
  0.19480000   2.00976910
  0.19480000   2.60416912
  0.19480000   2.01053055
  0.19480000   2.60440768
  0.19480000   2.01002537
  0.19480000   2.60424456
  0.19480000   2.01036138
  0.19480000   2.60434865
  0.19480000   2.01013885
  0.19480000   2.60427575
  0.19480000   2.01028715
  0.19480000   2.60432075
  0.19480000   2.01018919
  0.19480000   2.60428781
  0.19480000   2.01025468
  0.19480000   2.60430690
  0.19480000   2.01021160
  0.19480000   2.60429170
  0.19480000   2.01024056
  0.19480000   2.60429949
  0.19500000   2.60622077
  0.19500000   2.00604149
  0.19500000   2.60414803
  0.19500000   2.01037702
  0.19500000   2.60554644
  0.19500000   2.00744060
  0.19500000   2.60460112
  0.19500000   2.00941524
  0.19500000   2.60523519
  0.19500000   2.00808148
  0.19500000   2.60480393
  0.19500000   2.00898027
  0.19500000   2.60509120
  0.19500000   2.00837416
  0.19500000   2.60489417
  0.19500000   2.00878312
  0.19500000   2.60502398
  0.19500000   2.00850767
  0.19500000   2.60493366
  0.19500000   2.00869376
  0.19500000   2.60499203
  0.19500000   2.00856862
  0.19500000   2.60495035
  0.19520000   2.60666916
  0.19520000   2.00489254
  0.19520000   2.60495705
  0.19520000   2.00847666
  0.19520000   2.60612750
  0.19520000   2.00601446
  0.19520000   2.60532258
  0.19520000   2.00769697
  0.19520000   2.60586978
  0.19520000   2.00654365
  0.19520000   2.60549118
  0.19520000   2.00733308
  0.19520000   2.60574673
  0.19520000   2.00679269
  0.19520000   2.60556836
  0.19520000   2.00716301
  0.19520000   2.60568740
  0.19520000   2.00690981
  0.19520000   2.60560308
  0.19520000   2.00708353
  0.19520000   2.60565824
  0.19520000   2.00696493
  0.19520000   2.60561813
  0.19540000   2.60627729
  0.19540000   2.00550703
  0.19540000   2.60635337
  0.19540000   2.00533897
  0.19540000   2.60629383
  0.19540000   2.00545687
  0.19540000   2.60632944
  0.19540000   2.00537583
  0.19540000   2.60629964
  0.19540000   2.00543295
  0.19540000   2.60631590
  0.19540000   2.00539393
  0.19540000   2.60630064
  0.19540000   2.00542164
  0.19540000   2.60630771
  0.19540000   2.00540289
  0.19540000   2.60629963
  0.19540000   2.00541637
  0.19540000   2.60630238
  0.19540000   2.00540741
  0.19540000   2.60629787
  0.19540000   2.00541400
  0.19540000   2.60629864
  0.19560000   2.60598993
  0.19560000   2.00590211
  0.19560000   2.60767467
  0.19560000   2.00235106
  0.19560000   2.60648382
  0.19560000   2.00484859
  0.19560000   2.60732008
  0.19560000   2.00308369
  0.19560000   2.60672614
  0.19560000   2.00432734
  0.19560000   2.60714111
  0.19560000   2.00344975
  0.19560000   2.60684467
  0.19560000   2.00406885
  0.19560000   2.60705033
  0.19560000   2.00363243
  0.19560000   2.60690214
  0.19560000   2.00394058
  0.19560000   2.60700381
  0.19560000   2.00372357
  0.19560000   2.60692949
  0.19560000   2.00387696
  0.19560000   2.60697953
  0.19580000   2.60617974
  0.19580000   2.00529420
  0.19580000   2.60866681
  0.19580000   2.00004967
  0.19580000   2.60688924
  0.19580000   2.00378604
  0.19580000   2.60815989
  0.19580000   2.00110432
  0.19580000   2.60724772
  0.19580000   2.00301970
  0.19580000   2.60789716
  0.19580000   2.00164732
  0.19580000   2.60742898
  0.19580000   2.00262885
  0.19580000   2.60776075
  0.19580000   2.00192633
  0.19580000   2.60752026
  0.19580000   2.00242920
  0.19580000   2.60768953
  0.19580000   2.00206958
  0.19580000   2.60756580
  0.19580000   2.00232720
  0.19580000   2.60765196
  0.19600000   2.60682702
  0.19600000   2.00372233
  0.19600000   2.60934047
  0.19600000   1.99841559
  0.19600000   2.60751796
  0.19600000   2.00225128
  0.19600000   2.60883944
  0.19600000   1.99945906
  0.19600000   2.60787738
  0.19600000   2.00148200
  0.19600000   2.60857243
  0.19600000   2.00001173
  0.19600000   2.60806450
  0.19600000   2.00107827
  0.19600000   2.60842994
  0.19600000   2.00030389
  0.19600000   2.60816161
  0.19600000   2.00086609
  0.19600000   2.60835356
  0.19600000   2.00045820
  0.19600000   2.60821162
  0.19600000   2.00075452
  0.19600000   2.60831225
  0.19620000   2.60788052
  0.19620000   2.00129096
  0.19620000   2.60971848
  0.19620000   1.99740307
  0.19620000   2.60836296
  0.19620000   2.00025744
  0.19620000   2.60935722
  0.19620000   1.99815238
  0.19620000   2.60862134
  0.19620000   1.99970026
  0.19620000   2.60915916
  0.19620000   1.99856006
  0.19620000   2.60875954
  0.19620000   1.99939924
  0.19620000   2.60905028
  0.19620000   1.99878158
  0.19620000   2.60883310
  0.19620000   1.99923648
  0.19620000   2.60899008
  0.19620000   1.99890189
  0.19620000   2.60887189
  0.19620000   1.99914847
  0.19620000   2.60895647
  0.19640000   2.60924173
  0.19640000   1.99820417
  0.19640000   2.60985285
  0.19640000   1.99690404
  0.19640000   2.60939012
  0.19640000   1.99787467
  0.19640000   2.60972971
  0.19640000   1.99715057
  0.19640000   2.60947110
  0.19640000   1.99769153
  0.19640000   2.60965956
  0.19640000   1.99728827
  0.19640000   2.60951483
  0.19640000   1.99758974
  0.19640000   2.60961921
  0.19640000   1.99736519
  0.19640000   2.60953803
  0.19640000   1.99753319
  0.19640000   2.60959566
  0.19640000   1.99740818
  0.19640000   2.60954996
  0.19640000   1.99750182
  0.19640000   2.60958161
  0.19660000   2.61073352
  0.19660000   1.99483342
  0.19660000   2.60985848
  0.19660000   1.99667660
  0.19660000   2.61051437
  0.19660000   1.99528132
  0.19660000   2.61001253
  0.19660000   1.99633688
  0.19660000   2.61038719
  0.19660000   1.99553844
  0.19660000   2.61009922
  0.19660000   1.99614285
  0.19660000   2.61031305
  0.19660000   1.99568596
  0.19660000   2.61014764
  0.19660000   1.99603200
  0.19660000   2.61026950
  0.19660000   1.99577058
  0.19660000   2.61017434
  0.19660000   1.99596870
  0.19660000   2.61024363
  0.19660000   1.99581915
  0.19660000   2.61018875
  0.19680000   2.61218340
  0.19680000   1.99154310
  0.19680000   2.60986198
  0.19680000   1.99645332
  0.19680000   2.61164068
  0.19680000   1.99267788
  0.19680000   2.61027443
  0.19680000   1.99556625
  0.19680000   2.61131870
  0.19680000   1.99334830
  0.19680000   2.61051458
  0.19680000   1.99504702
  0.19680000   2.61112768
  0.19680000   1.99374372
  0.19680000   2.61065433
  0.19680000   1.99474260
  0.19680000   2.61101417
  0.19680000   1.99397670
  0.19680000   2.61073543
  0.19680000   1.99456400
  0.19680000   2.61094650
  0.19680000   1.99411390
  0.19680000   2.61078225
  0.19700000   2.61349614
  0.19700000   1.98853614
  0.19700000   2.60994362
  0.19700000   1.99606427
  0.19700000   2.61270895
  0.19700000   1.99019203
  0.19700000   2.61056320
  0.19700000   1.99473752
  0.19700000   2.61222954
  0.19700000   1.99119763
  0.19700000   2.61093340
  0.19700000   1.99394213
  0.19700000   2.61193790
  0.19700000   1.99180712
  0.19700000   2.61115494
  0.19700000   1.99346397
  0.19700000   2.61176047
  0.19700000   1.99217601
  0.19700000   2.61128746
  0.19700000   1.99317611
  0.19700000   2.61165240
  0.19700000   1.99239908
  0.19700000   2.61136656
  0.19720000   2.61464434
  0.19720000   1.98587246
  0.19720000   2.61013502
  0.19720000   1.99544203
  0.19720000   2.61369528
  0.19720000   1.98787519
  0.19720000   2.61090129
  0.19720000   1.99380296
  0.19720000   2.61310221
  0.19720000   1.98912385
  0.19720000   2.61137061
  0.19720000   1.99279646
  0.19720000   2.61273207
  0.19720000   1.98990095
  0.19720000   2.61165886
  0.19720000   1.99217619
  0.19720000   2.61250121
  0.19720000   1.99038383
  0.19720000   2.61183603
  0.19720000   1.99179321
  0.19720000   2.61235718
  0.19720000   1.99068357
  0.19720000   2.61194485
  0.19740000   2.61562408
  0.19740000   1.98356215
  0.19740000   2.61044876
  0.19740000   1.99455932
  0.19740000   2.61458936
  0.19740000   1.98575014
  0.19740000   2.61130117
  0.19740000   1.99273581
  0.19740000   2.61392633
  0.19740000   1.98714939
  0.19740000   2.61183626
  0.19740000   1.99158855
  0.19740000   2.61350197
  0.19740000   1.98804285
  0.19740000   2.61217334
  0.19740000   1.99086385
  0.19740000   2.61323059
  0.19740000   1.98861253
  0.19740000   2.61238599
  0.19740000   1.99040507
  0.19740000   2.61305707
  0.19740000   1.98897535
  0.19740000   2.61252013
  0.19760000   2.61642321
  0.19760000   1.98163272
  0.19760000   2.61090335
  0.19760000   1.99337614
  0.19760000   2.61537537
  0.19760000   1.98385143
  0.19760000   2.61178013
  0.19760000   1.99149891
  0.19760000   2.61468730
  0.19760000   1.98530580
  0.19760000   2.61234437
  0.19760000   1.99028842
  0.19760000   2.61423590
  0.19760000   1.98625798
  0.19760000   2.61270886
  0.19760000   1.98950463
  0.19760000   2.61394000
  0.19760000   1.98688056
  0.19760000   2.61294471
  0.19760000   1.98899596
  0.19760000   2.61374611
  0.19760000   1.98728720
  0.19760000   2.61309738
  0.19780000   2.61701123
  0.19780000   1.98015078
  0.19780000   2.61153227
  0.19780000   1.99182034
  0.19780000   2.61602443
  0.19780000   1.98224162
  0.19780000   2.61236686
  0.19780000   1.99003067
  0.19780000   2.61536071
  0.19780000   1.98364569
  0.19780000   2.61291777
  0.19780000   1.98884719
  0.19780000   2.61491462
  0.19780000   1.98458765
  0.19780000   2.61328269
  0.19780000   1.98806160
  0.19780000   2.61461502
  0.19780000   1.98521888
  0.19780000   2.61352481
  0.19780000   1.98753900
  0.19780000   2.61441387
  0.19780000   1.98564148
  0.19780000   2.61368554
  0.19800000   2.61734495
  0.19800000   1.97921018
  0.19800000   2.61237919
  0.19800000   1.98979765
  0.19800000   2.61649684
  0.19800000   1.98100653
  0.19800000   2.61309974
  0.19800000   1.98824856
  0.19800000   2.61591281
  0.19800000   1.98224181
  0.19800000   2.61358793
  0.19800000   1.98719731
  0.19800000   2.61551087
  0.19800000   1.98309053
  0.19800000   2.61391957
  0.19800000   1.98648174
  0.19800000   2.61523439
  0.19800000   1.98367311
  0.19800000   2.61414517
  0.19800000   1.98599377
  0.19800000   2.61504425
  0.19800000   1.98407267
  0.19800000   2.61429868
  0.19820000   2.61738387
  0.19820000   1.97889901
  0.19820000   2.61348333
  0.19820000   1.98722253
  0.19820000   2.61675184
  0.19820000   1.98023449
  0.19820000   2.61401787
  0.19820000   1.98606801
  0.19820000   2.61630647
  0.19820000   1.98117441
  0.19820000   2.61438980
  0.19820000   1.98526346
  0.19820000   2.61599274
  0.19820000   1.98183540
  0.19820000   2.61464897
  0.19820000   1.98470170
  0.19820000   2.61577181
  0.19820000   1.98229987
  0.19820000   2.61482967
  0.19820000   1.98430898
  0.19820000   2.61561622
  0.19820000   1.98262604
  0.19820000   2.61495566
  0.19840000   2.61711010
  0.19840000   1.97925680
  0.19840000   2.61486027
  0.19840000   1.98405922
  0.19840000   2.61676227
  0.19840000   1.97998478
  0.19840000   2.61514710
  0.19840000   1.98343216
  0.19840000   2.61651163
  0.19840000   1.98050872
  0.19840000   2.61535205
  0.19840000   1.98298330
  0.19840000   2.61633099
  0.19840000   1.98088557
  0.19840000   2.61549848
  0.19840000   1.98266176
  0.19840000   2.61620075
  0.19840000   1.98115649
  0.19840000   2.61560304
  0.19840000   1.98243131
  0.19840000   2.61610678
  0.19840000   1.98135118
  0.19840000   2.61567765
  0.19860000   2.61654475
  0.19860000   1.98023930
  0.19860000   2.61648693
  0.19860000   1.98035422
  0.19860000   2.61652892
  0.19860000   1.98025674
  0.19860000   2.61648642
  0.19860000   1.98034115
  0.19860000   2.61651719
  0.19860000   1.98026951
  0.19860000   2.61648585
  0.19860000   1.98033153
  0.19860000   2.61650833
  0.19860000   1.98027890
  0.19860000   2.61648516
  0.19860000   1.98032446
  0.19860000   2.61650152
  0.19860000   1.98028581
  0.19860000   2.61648434
  0.19860000   1.98031929
  0.19860000   2.61649621
  0.19860000   1.98029090
  0.19860000   2.61648343
  0.19880000   2.61575054
  0.19880000   1.98171266
  0.19880000   2.61830136
  0.19880000   1.97623752
  0.19880000   2.61608623
  0.19880000   1.98097742
  0.19880000   2.61800320
  0.19880000   1.97686278
  0.19880000   2.61633774
  0.19880000   1.98042641
  0.19880000   2.61777843
  0.19880000   1.97733392
  0.19880000   2.61652620
  0.19880000   1.98001313
  0.19880000   2.61760894
  0.19880000   1.97768875
  0.19880000   2.61666739
  0.19880000   1.97970296
  0.19880000   2.61748109
  0.19880000   1.97795590
  0.19880000   2.61677315
  0.19880000   1.97947010
  0.19880000   2.61738462
  0.19900000   2.61481649
  0.19900000   1.98348651
  0.19900000   2.62022010
  0.19900000   1.97188621
  0.19900000   2.61549373
  0.19900000   1.98201975
  0.19900000   2.61964235
  0.19900000   1.97311352
  0.19900000   2.61600981
  0.19900000   1.98090175
  0.19900000   2.61919677
  0.19900000   1.97405981
  0.19900000   2.61640403
  0.19900000   1.98004729
  0.19900000   2.61885306
  0.19900000   1.97478933
  0.19900000   2.61670562
  0.19900000   1.97939309
  0.19900000   2.61858796
  0.19900000   1.97535158
  0.19900000   2.61693658
  0.19900000   1.97889162
  0.19900000   2.61838350
  0.19920000   2.61383231
  0.19920000   1.98536884
  0.19920000   2.62216350
  0.19920000   1.96747068
  0.19920000   2.61481728
  0.19920000   1.98324294
  0.19920000   2.62134458
  0.19920000   1.96921966
  0.19920000   2.61557894
  0.19920000   1.98159837
  0.19920000   2.62069986
  0.19920000   1.97059617
  0.19920000   2.61617085
  0.19920000   1.98031968
  0.19920000   2.62019175
  0.19920000   1.97168055
  0.19920000   2.61663236
  0.19920000   1.97932214
  0.19920000   2.61979113
  0.19920000   1.97253507
  0.19920000   2.61699297
  0.19920000   1.97854216
  0.19920000   2.61947523
  0.19940000   2.61286716
  0.19940000   1.98721170
  0.19940000   2.62407406
  0.19940000   1.96311483
  0.19940000   2.61411112
  0.19940000   1.98453090
  0.19940000   2.62306261
  0.19940000   1.96528246
  0.19940000   2.61508544
  0.19940000   1.98243008
  0.19940000   2.62225173
  0.19940000   1.96701966
  0.19940000   2.61585454
  0.19940000   1.98077088
  0.19940000   2.62159993
  0.19940000   1.96841547
  0.19940000   2.61646481
  0.19940000   1.97945361
  0.19940000   2.62107528
  0.19940000   1.96953849
  0.19940000   2.61695076
  0.19940000   1.97840410
  0.19940000   2.62065267
  0.19960000   2.61196147
  0.19960000   1.98892857
  0.19960000   2.62592136
  0.19960000   1.95888504
  0.19960000   2.61340939
  0.19960000   1.98581056
  0.19960000   2.62476795
  0.19960000   1.96136348
  0.19960000   2.61455636
  0.19960000   1.98333905
  0.19960000   2.62382844
  0.19960000   1.96338153
  0.19960000   2.61547472
  0.19960000   1.98135900
  0.19960000   2.62305967
  0.19960000   1.96503216
  0.19960000   2.61621537
  0.19960000   1.97976122
  0.19960000   2.62242888
  0.19960000   1.96638596
  0.19960000   2.61681570
  0.19960000   1.97846550
  0.19960000   2.62191048
  0.19980000   2.61113071
  0.19980000   1.99048634
  0.19980000   2.62769651
  0.19980000   1.95480148
  0.19980000   2.61272728
  0.19980000   1.98704937
  0.19980000   2.62644873
  0.19980000   1.95748866
  0.19980000   2.61400495
  0.19980000   1.98429694
  0.19980000   2.62541818
  0.19980000   1.95970718
  0.19980000   2.61504132
  0.19980000   1.98206294
  0.19980000   2.62456134
  0.19980000   1.96155096
  0.19980000   2.61588979
  0.19980000   1.98023295
  0.19980000   2.62384589
  0.19980000   1.96308989
  0.19980000   2.61658896
  0.19980000   1.97872420
  0.19980000   2.62324685
  0.20000000   2.61037466
  0.20000000   1.99188548
  0.20000000   2.62940306
  0.20000000   1.95085743
  0.20000000   2.61206744
  0.20000000   1.98824168
  0.20000000   2.62810360
  0.20000000   1.95366134
  0.20000000   2.61343474
  0.20000000   1.98529626
  0.20000000   2.62701739
  0.20000000   1.95600424
  0.20000000   2.61455697
  0.20000000   1.98287720
  0.20000000   2.62610146
  0.20000000   1.95797907
  0.20000000   2.61548843
  0.20000000   1.98086821
  0.20000000   2.62532455
  0.20000000   1.95965356
  0.20000000   2.61626777
  0.20000000   1.97918647
  0.20000000   2.62466286
  0.20020000   2.60968682
  0.20020000   1.99313989
  0.20020000   2.63104887
  0.20020000   1.94703669
  0.20020000   2.61142708
  0.20020000   1.98939342
  0.20020000   2.62973544
  0.20020000   1.94987566
  0.20020000   2.61284478
  0.20020000   1.98633909
  0.20020000   2.62862617
  0.20020000   1.95227253
  0.20020000   2.61402083
  0.20020000   1.98380371
  0.20020000   2.62767928
  0.20020000   1.95431781
  0.20020000   2.61500912
  0.20020000   1.98167191
  0.20020000   2.62686488
  0.20020000   1.95607630
  0.20020000   2.61584751
  0.20020000   1.97986255
  0.20020000   2.62616064
  0.20040000   2.60906175
  0.20040000   1.99426111
  0.20040000   2.63264046
  0.20040000   1.94332586
  0.20040000   2.61080388
  0.20040000   1.99050962
  0.20040000   2.63134665
  0.20040000   1.94612677
  0.20040000   2.61223432
  0.20040000   1.98742709
  0.20040000   2.63024439
  0.20040000   1.94851233
  0.20040000   2.61343229
  0.20040000   1.98484391
  0.20040000   2.62929365
  0.20040000   1.95056935
  0.20040000   2.61445011
  0.20040000   1.98264800
  0.20040000   2.62846617
  0.20040000   1.95235916
  0.20040000   2.61532418
  0.20040000   1.98076131
  0.20040000   2.62774112
  0.20060000   2.60850021
  0.20060000   1.99524742
  0.20060000   2.63417954
  0.20060000   1.93972193
  0.20060000   2.61020019
  0.20060000   1.99158517
  0.20060000   2.63293605
  0.20060000   1.94241759
  0.20060000   2.61160640
  0.20060000   1.98855380
  0.20060000   2.63186896
  0.20060000   1.94473040
  0.20060000   2.61279408
  0.20060000   1.98599206
  0.20060000   2.63094065
  0.20060000   1.94674198
  0.20060000   2.61381279
  0.20060000   1.98379365
  0.20060000   2.63012473
  0.20060000   1.94850961
  0.20060000   2.61469692
  0.20060000   1.98188483
  0.20060000   2.62940192
  0.20080000   2.60801271
  0.20080000   1.99607619
  0.20080000   2.63566079
  0.20080000   1.93623709
  0.20080000   2.60962627
  0.20080000   1.99259806
  0.20080000   2.63449679
  0.20080000   1.93876335
  0.20080000   2.61097068
  0.20080000   1.98969849
  0.20080000   2.63349192
  0.20080000   1.94094413
  0.20080000   2.61211479
  0.20080000   1.98722975
  0.20080000   2.63261176
  0.20080000   1.94285400
  0.20080000   2.61310414
  0.20080000   1.98509402
  0.20080000   2.63183218
  0.20080000   1.94454539
  0.20080000   2.61397036
  0.20080000   1.98322334
  0.20080000   2.63113557
  0.20100000   2.60762258
  0.20100000   1.99669721
  0.20100000   2.63707028
  0.20100000   1.93290250
  0.20100000   2.60910310
  0.20100000   1.99350316
  0.20100000   2.63601478
  0.20100000   1.93519528
  0.20100000   2.61034611
  0.20100000   1.99082052
  0.20100000   2.63509891
  0.20100000   1.93718498
  0.20100000   2.61141138
  0.20100000   1.98852064
  0.20100000   2.63429246
  0.20100000   1.93893698
  0.20100000   2.61233895
  0.20100000   1.98651736
  0.20100000   2.63357409
  0.20100000   1.94049758
  0.20100000   2.61315690
  0.20100000   1.98475031
  0.20100000   2.63292816
  0.20120000   2.60736939
  0.20120000   1.99702528
  0.20120000   2.63838322
  0.20120000   1.92977315
  0.20120000   2.60866592
  0.20120000   1.99422472
  0.20120000   2.63746661
  0.20120000   1.93176511
  0.20120000   2.60976414
  0.20120000   1.99185222
  0.20120000   2.63666737
  0.20120000   1.93350260
  0.20120000   2.61071209
  0.20120000   1.98980399
  0.20120000   2.63596063
  0.20120000   1.93503928
  0.20120000   2.61154265
  0.20120000   1.98800906
  0.20120000   2.63532859
  0.20120000   1.93641372
  0.20120000   2.61227924
  0.20120000   1.98641692
  0.20120000   2.63475804
  0.20140000   2.60731377
  0.20140000   1.99692971
  0.20140000   2.63956057
  0.20140000   1.92693560
  0.20140000   2.60836940
  0.20140000   1.99464499
  0.20140000   2.63881617
  0.20140000   1.92855269
  0.20140000   2.60927389
  0.20140000   1.99268792
  0.20140000   2.63816342
  0.20140000   1.92997167
  0.20140000   2.61006121
  0.20140000   1.99098455
  0.20140000   2.63758393
  0.20140000   1.93123198
  0.20140000   2.61075543
  0.20140000   1.98948264
  0.20140000   2.63706421
  0.20140000   1.93236270
  0.20140000   2.61137417
  0.20140000   1.98814403
  0.20140000   2.63659405
  0.20160000   2.60754434
  0.20160000   1.99621917
  0.20160000   2.64054279
  0.20160000   1.92452165
  0.20160000   2.60829615
  0.20160000   1.99458590
  0.20160000   2.64000837
  0.20160000   1.92567985
  0.20160000   2.60895086
  0.20160000   1.99316494
  0.20160000   2.63953602
  0.20160000   1.92670492
  0.20160000   2.60952740
  0.20160000   1.99191445
  0.20160000   2.63911456
  0.20160000   1.92762046
  0.20160000   2.61003991
  0.20160000   1.99080329
  0.20160000   2.63873546
  0.20160000   1.92844457
  0.20160000   2.61049922
  0.20160000   1.98980775
  0.20160000   2.63839210
  0.20180000   2.60818673
  0.20180000   1.99462171
  0.20180000   2.64123971
  0.20180000   1.92273081
  0.20180000   2.60856984
  0.20180000   1.99378025
  0.20180000   2.64095783
  0.20180000   1.92333544
  0.20180000   2.60891214
  0.20180000   1.99303070
  0.20180000   2.64070555
  0.20180000   1.92387838
  0.20180000   2.60921927
  0.20180000   1.99235954
  0.20180000   2.64047854
  0.20180000   1.92436813
  0.20180000   2.60949599
  0.20180000   1.99175573
  0.20180000   2.64027329
  0.20180000   1.92481168
  0.20180000   2.60974628
  0.20180000   1.99121018
  0.20180000   2.64008696
  0.20200000   2.60941273
  0.20200000   1.99176398
  0.20200000   2.64151480
  0.20200000   1.92186488
  0.20200000   2.60937398
  0.20200000   1.99183058
  0.20200000   2.64152893
  0.20200000   1.92181931
  0.20200000   2.60934165
  0.20200000   1.99188758
  0.20200000   2.64154180
  0.20200000   1.92177993
  0.20200000   2.60931426
  0.20200000   1.99193675
  0.20200000   2.64155339
  0.20200000   1.92174572
  0.20200000   2.60929081
  0.20200000   1.99197942
  0.20200000   2.64156374
  0.20200000   1.92171590
  0.20200000   2.60927059
  0.20200000   1.99201657
  0.20200000   2.64157293
  0.20220000   2.61144294
  0.20220000   1.98716385
  0.20220000   2.64116433
  0.20220000   1.92237362
  0.20220000   2.61097264
  0.20220000   1.98816245
  0.20220000   2.64150327
  0.20220000   1.92161381
  0.20220000   2.61052813
  0.20220000   1.98910936
  0.20220000   2.64182268
  0.20220000   1.92090026
  0.20220000   2.61011002
  0.20220000   1.99000183
  0.20220000   2.64212153
  0.20220000   1.92023415
  0.20220000   2.60971890
  0.20220000   1.99083783
  0.20220000   2.64239932
  0.20220000   1.91961592
  0.20220000   2.60935506
  0.20220000   1.99161619
  0.20220000   2.64265596
  0.20240000   2.61452784
  0.20240000   1.98026832
  0.20240000   2.63989871
  0.20240000   1.92489485
  0.20240000   2.61371692
  0.20240000   1.98200702
  0.20240000   2.64053523
  0.20240000   1.92348089
  0.20240000   2.61290626
  0.20240000   1.98374852
  0.20240000   2.64116328
  0.20240000   1.92208852
  0.20240000   2.61210301
  0.20240000   1.98547589
  0.20240000   2.64177614
  0.20240000   1.92073143
  0.20240000   2.61131501
  0.20240000   1.98717139
  0.20240000   2.64236749
  0.20240000   1.91942288
  0.20240000   2.61055020
  0.20240000   1.98881734
  0.20240000   2.64293163
  0.20260000   2.61888529
  0.20260000   1.97058623
  0.20260000   2.63735132
  0.20260000   1.93023280
  0.20260000   2.61799309
  0.20260000   1.97250748
  0.20260000   2.63812132
  0.20260000   1.92852682
  0.20260000   2.61704677
  0.20260000   1.97454939
  0.20260000   2.63892711
  0.20260000   1.92674489
  0.20260000   2.61604988
  0.20260000   1.97670261
  0.20260000   2.63976169
  0.20260000   1.92490122
  0.20260000   2.61500875
  0.20260000   1.97895236
  0.20260000   2.64061636
  0.20260000   1.92301420
  0.20260000   2.61393258
  0.20260000   1.98127798
  0.20260000   2.64148071
  0.20280000   2.62458050
  0.20280000   1.95794858
  0.20280000   2.63316558
  0.20280000   1.93916252
  0.20280000   2.62404463
  0.20280000   1.95910059
  0.20280000   2.63367701
  0.20280000   1.93802652
  0.20280000   2.62344833
  0.20280000   1.96038826
  0.20280000   2.63424577
  0.20280000   1.93676790
  0.20280000   2.62278474
  0.20280000   1.96182498
  0.20280000   2.63487526
  0.20280000   1.93537798
  0.20280000   2.62204728
  0.20280000   1.96342405
  0.20280000   2.63556853
  0.20280000   1.93384923
  0.20280000   2.62122982
  0.20280000   1.96519804
  0.20280000   2.63632790
  0.20300000   2.63138375
  0.20300000   1.94282619
  0.20300000   2.62720465
  0.20300000   1.95196526
  0.20300000   2.63166232
  0.20300000   1.94219866
  0.20300000   2.62688046
  0.20300000   1.95265940
  0.20300000   2.63198289
  0.20300000   1.94148323
  0.20300000   2.62651206
  0.20300000   1.95345352
  0.20300000   2.63234996
  0.20300000   1.94066857
  0.20300000   2.62609241
  0.20300000   1.95436180
  0.20300000   2.63276880
  0.20300000   1.93974218
  0.20300000   2.62561392
  0.20300000   1.95540009
  0.20300000   2.63324533
  0.20300000   1.93869046
  0.20300000   2.62506828
  0.20320000   2.63871599
  0.20320000   1.92646564
  0.20320000   2.61981246
  0.20320000   1.96785976
  0.20320000   2.63997309
  0.20320000   1.92368030
  0.20320000   2.61824036
  0.20320000   1.97126839
  0.20320000   2.64135697
  0.20320000   1.92061793
  0.20320000   2.61648539
  0.20320000   1.97507484
  0.20320000   2.64285399
  0.20320000   1.91730661
  0.20320000   2.61455553
  0.20320000   1.97925937
  0.20320000   2.64443898
  0.20320000   1.91380043
  0.20320000   2.61247521
  0.20320000   1.98376688
  0.20320000   2.64607366
  0.20320000   1.91018293
  0.20320000   2.61028902
  0.20340000   2.64579666
  0.20340000   1.91058116
  0.20340000   2.61187203
  0.20340000   1.98489427
  0.20340000   2.64771863
  0.20340000   1.90631308
  0.20340000   2.60924598
  0.20340000   1.99057180
  0.20340000   2.64963212
  0.20340000   1.90206374
  0.20340000   2.60657737
  0.20340000   1.99633512
  0.20340000   2.65144843
  0.20340000   1.89802825
  0.20340000   2.60399304
  0.20340000   2.00190867
  0.20340000   2.65308178
  0.20340000   1.89439663
  0.20340000   2.60162585
  0.20340000   2.00700627
  0.20340000   2.65446790
  0.20340000   1.89131205
  0.20340000   2.59958448
  0.20360000   2.65195341
  0.20360000   1.89667395
  0.20360000   2.60446407
  0.20360000   2.00071574
  0.20360000   2.65396211
  0.20360000   1.89219711
  0.20360000   2.60152343
  0.20360000   2.00704782
  0.20360000   2.65568576
  0.20360000   1.88835308
  0.20360000   2.59895179
  0.20360000   2.01257638
  0.20360000   2.65705924
  0.20360000   1.88528702
  0.20360000   2.59686964
  0.20360000   2.01704542
  0.20360000   2.65807840
  0.20360000   1.88300923
  0.20360000   2.59530489
  0.20360000   2.02039897
  0.20360000   2.65878880
  0.20360000   1.88141927
  0.20360000   2.59420340
  0.20380000   2.65687202
  0.20380000   1.88546590
  0.20380000   2.59834973
  0.20380000   2.01369656
  0.20380000   2.65851913
  0.20380000   1.88177978
  0.20380000   2.59581354
  0.20380000   2.01913704
  0.20380000   2.65971296
  0.20380000   1.87910457
  0.20380000   2.59394822
  0.20380000   2.02313157
  0.20380000   2.66051107
  0.20380000   1.87731301
  0.20380000   2.59268704
  0.20380000   2.02582788
  0.20380000   2.66101133
  0.20380000   1.87618745
  0.20380000   2.59188936
  0.20380000   2.02753035
  0.20380000   2.66131057
  0.20380000   1.87551206
  0.20380000   2.59140831
  0.20400000   2.66061078
  0.20400000   1.87685144
  0.20400000   2.59372719
  0.20400000   2.02343812
  0.20400000   2.66174949
  0.20400000   1.87429016
  0.20400000   2.59190611
  0.20400000   2.02733109
  0.20400000   2.66244939
  0.20400000   1.87271186
  0.20400000   2.59077381
  0.20400000   2.02974678
  0.20400000   2.66285029
  0.20400000   1.87180444
  0.20400000   2.59011864
  0.20400000   2.03114117
  0.20400000   2.66306909
  0.20400000   1.87130640
  0.20400000   2.58975711
  0.20400000   2.03190799
  0.20400000   2.66318461
  0.20400000   1.87104104
  0.20400000   2.58956332
  0.20420000   2.66343387
  0.20420000   1.87025936
  0.20420000   2.59037540
  0.20420000   2.03043811
  0.20420000   2.66412969
  0.20420000   1.86868316
  0.20420000   2.58922654
  0.20420000   2.03288477
  0.20420000   2.66449716
  0.20420000   1.86784611
  0.20420000   2.58861220
  0.20420000   2.03418875
  0.20420000   2.66468064
  0.20420000   1.86742434
  0.20420000   2.58830058
  0.20420000   2.03484672
  0.20420000   2.66476867
  0.20420000   1.86721869
  0.20420000   2.58814728
  0.20420000   2.03516749
  0.20420000   2.66480933
  0.20420000   1.86712084
  0.20420000   2.58807327
  0.20440000   2.66563510
  0.20440000   1.86504470
  0.20440000   2.58792991
  0.20440000   2.03549089
  0.20440000   2.66602130
  0.20440000   1.86415974
  0.20440000   2.58727088
  0.20440000   2.03688663
  0.20440000   2.66619783
  0.20440000   1.86374988
  0.20440000   2.58696310
  0.20440000   2.03753378
  0.20440000   2.66627435
  0.20440000   1.86356767
  0.20440000   2.58682452
  0.20440000   2.03782124
  0.20440000   2.66630561
  0.20440000   1.86348929
  0.20440000   2.58676352
  0.20440000   2.03794447
  0.20440000   2.66631703
  0.20440000   1.86345704
  0.20440000   2.58673719
  0.20460000   2.66744661
  0.20460000   1.86069442
  0.20460000   2.58606505
  0.20460000   2.03929967
  0.20460000   2.66764257
  0.20460000   1.86023556
  0.20460000   2.58571550
  0.20460000   2.04003248
  0.20460000   2.66771901
  0.20460000   1.86005025
  0.20460000   2.58557199
  0.20460000   2.04032800
  0.20460000   2.66774622
  0.20460000   1.85997881
  0.20460000   2.58551478
  0.20460000   2.04044135
  0.20460000   2.66775402
  0.20460000   1.85995317
  0.20460000   2.58549261
  0.20460000   2.04048148
  0.20460000   2.66775452
  0.20460000   1.85994548
  0.20460000   2.58548443
  0.20480000   2.66902280
  0.20480000   1.85686587
  0.20480000   2.58455095
  0.20480000   2.04235868
  0.20480000   2.66911176
  0.20480000   1.85664747
  0.20480000   2.58437931
  0.20480000   2.04271072
  0.20480000   2.66913918
  0.20480000   1.85657245
  0.20480000   2.58431780
  0.20480000   2.04283082
  0.20480000   2.66914494
  0.20480000   1.85654932
  0.20480000   2.58429662
  0.20480000   2.04286710
  0.20480000   2.66914361
  0.20480000   1.85654426
  0.20480000   2.58428985
  0.20480000   2.04287428
  0.20480000   2.66914031
  0.20480000   1.85654513
  0.20480000   2.58428811
  0.20500000   2.67045696
  0.20500000   1.85335148
  0.20500000   2.58324407
  0.20500000   2.04497579
  0.20500000   2.67048997
  0.20500000   1.85325919
  0.20500000   2.58316722
  0.20500000   2.04512507
  0.20500000   2.67049495
  0.20500000   1.85323483
  0.20500000   2.58314392
  0.20500000   2.04516343
  0.20500000   2.67049204
  0.20500000   1.85323130
  0.20500000   2.58313760
  0.20500000   2.04516794
  0.20500000   2.67048746
  0.20500000   1.85323358
  0.20500000   2.58313644
  0.20500000   2.04516313
  0.20500000   2.67048301
  0.20500000   1.85323708
  0.20500000   2.58313673
  0.20520000   2.67180242
  0.20520000   1.85003231
  0.20520000   2.58206077
  0.20520000   2.04733018
  0.20520000   2.67180831
  0.20520000   1.85000135
  0.20520000   2.58203070
  0.20520000   2.04737942
  0.20520000   2.67180385
  0.20520000   1.84999838
  0.20520000   2.58202380
  0.20520000   2.04738270
  0.20520000   2.67179780
  0.20520000   1.85000199
  0.20520000   2.58202300
  0.20520000   2.04737540
  0.20520000   2.67179224
  0.20520000   1.85000651
  0.20520000   2.58202360
  0.20520000   2.04736681
  0.20520000   2.67178753
  0.20520000   1.85001060
  0.20520000   2.58202439
  0.20540000   2.67308878
  0.20540000   1.84684225
  0.20540000   2.58095429
  0.20540000   2.04952190
  0.20540000   2.67308272
  0.20540000   1.84683846
  0.20540000   2.58094526
  0.20540000   2.04952615
  0.20540000   2.67307474
  0.20540000   1.84684350
  0.20540000   2.58094463
  0.20540000   2.04951604
  0.20540000   2.67306775
  0.20540000   1.84684925
  0.20540000   2.58094555
  0.20540000   2.04950504
  0.20540000   2.67306201
  0.20540000   1.84685420
  0.20540000   2.58094654
  0.20540000   2.04949561
  0.20540000   2.67305731
  0.20540000   1.84685826
  0.20540000   2.58094736
  0.20560000   2.67433222
  0.20560000   1.84374521
  0.20560000   2.57989927
  0.20560000   2.05160524
  0.20560000   2.67432155
  0.20560000   1.84375193
  0.20560000   2.57989855
  0.20560000   2.05159172
  0.20560000   2.67431254
  0.20560000   1.84375936
  0.20560000   2.57989987
  0.20560000   2.05157742
  0.20560000   2.67430539
  0.20560000   1.84376547
  0.20560000   2.57990113
  0.20560000   2.05156568
  0.20560000   2.67429971
  0.20560000   1.84377032
  0.20560000   2.57990209
  0.20560000   2.05155631
  0.20560000   2.67429509
  0.20560000   1.84377420
  0.20560000   2.57990280
  0.20580000   2.67554156
  0.20580000   1.84072150
  0.20580000   2.57888222
  0.20580000   2.05360903
  0.20580000   2.67552952
  0.20580000   1.84073141
  0.20580000   2.57888412
  0.20580000   2.05358990
  0.20580000   2.67552037
  0.20580000   1.84073918
  0.20580000   2.57888579
  0.20580000   2.05357485
  0.20580000   2.67551331
  0.20580000   1.84074511
  0.20580000   2.57888697
  0.20580000   2.05356327
  0.20580000   2.67550772
  0.20580000   1.84074973
  0.20580000   2.57888780
  0.20580000   2.05355418
  0.20580000   2.67550319
  0.20580000   1.84075342
  0.20580000   2.57888839
  0.20600000   2.67672175
  0.20600000   1.83776019
  0.20600000   2.57789603
  0.20600000   2.05554848
  0.20600000   2.67670955
  0.20600000   1.83777051
  0.20600000   2.57789837
  0.20600000   2.05552840
  0.20600000   2.67670052
  0.20600000   1.83777801
  0.20600000   2.57789989
  0.20600000   2.05551364
  0.20600000   2.67669359
  0.20600000   1.83778365
  0.20600000   2.57790090
  0.20600000   2.05550242
  0.20600000   2.67668811
  0.20600000   1.83778804
  0.20600000   2.57790159
  0.20600000   2.05549361
  0.20600000   2.67668366
  0.20600000   1.83779155
  0.20600000   2.57790208
  0.20620000   2.67787575
  0.20620000   1.83485478
  0.20620000   2.57693686
  0.20620000   2.05743181
  0.20620000   2.67786373
  0.20620000   1.83486471
  0.20620000   2.57693897
  0.20620000   2.05741219
  0.20620000   2.67785487
  0.20620000   1.83487184
  0.20620000   2.57694026
  0.20620000   2.05739791
  0.20620000   2.67784807
  0.20620000   1.83487720
  0.20620000   2.57694109
  0.20620000   2.05738705
  0.20620000   2.67784268
  0.20620000   1.83488137
  0.20620000   2.57694166
  0.20620000   2.05737851
  0.20620000   2.67783831
  0.20620000   1.83488472
  0.20620000   2.57694205
  0.20640000   2.67900554
  0.20640000   1.83200099
  0.20640000   2.57600241
  0.20640000   2.05926392
  0.20640000   2.67899375
  0.20640000   1.83201039
  0.20640000   2.57600419
  0.20640000   2.05924498
  0.20640000   2.67898505
  0.20640000   1.83201717
  0.20640000   2.57600525
  0.20640000   2.05923116
  0.20640000   2.67897837
  0.20640000   1.83202227
  0.20640000   2.57600593
  0.20640000   2.05922062
  0.20640000   2.67897306
  0.20640000   1.83202626
  0.20640000   2.57600638
  0.20640000   2.05921231
  0.20640000   2.67896876
  0.20640000   1.83202946
  0.20640000   2.57600669
  0.20660000   2.68011265
  0.20660000   1.82919551
  0.20660000   2.57509107
  0.20660000   2.06104820
  0.20660000   2.68010108
  0.20660000   1.82920444
  0.20660000   2.57509255
  0.20660000   2.06102991
  0.20660000   2.68009252
  0.20660000   1.82921089
  0.20660000   2.57509341
  0.20660000   2.06101650
  0.20660000   2.68008594
  0.20660000   1.82921577
  0.20660000   2.57509395
  0.20660000   2.06100624
  0.20660000   2.68008071
  0.20660000   1.82921959
  0.20660000   2.57509430
  0.20660000   2.06099814
  0.20660000   2.68007646
  0.20660000   1.82922265
  0.20660000   2.57509452
  0.20680000   2.68119840
  0.20680000   1.82643554
  0.20680000   2.57420154
  0.20680000   2.06278749
  0.20680000   2.68118702
  0.20680000   1.82644404
  0.20680000   2.57420275
  0.20680000   2.06276975
  0.20680000   2.68117859
  0.20680000   1.82645021
  0.20680000   2.57420344
  0.20680000   2.06275671
  0.20680000   2.68117210
  0.20680000   1.82645488
  0.20680000   2.57420385
  0.20680000   2.06274671
  0.20680000   2.68116694
  0.20680000   1.82645854
  0.20680000   2.57420410
  0.20680000   2.06273880
  0.20680000   2.68116275
  0.20680000   1.82646149
  0.20680000   2.57420425
  0.20700000   2.68226398
  0.20700000   1.82371855
  0.20700000   2.57333263
  0.20700000   2.06448429
  0.20700000   2.68225276
  0.20700000   1.82372667
  0.20700000   2.57333360
  0.20700000   2.06446704
  0.20700000   2.68224445
  0.20700000   1.82373258
  0.20700000   2.57333412
  0.20700000   2.06445433
  0.20700000   2.68223805
  0.20700000   1.82373706
  0.20700000   2.57333442
  0.20700000   2.06444456
  0.20700000   2.68223295
  0.20700000   1.82374058
  0.20700000   2.57333459
  0.20700000   2.06443683
  0.20700000   2.68222881
  0.20700000   1.82374341
  0.20700000   2.57333467
  0.20720000   2.68331046
  0.20720000   1.82104224
  0.20720000   2.57248328
  0.20720000   2.06614088
  0.20720000   2.68329941
  0.20720000   1.82105002
  0.20720000   2.57248401
  0.20720000   2.06612409
  0.20720000   2.68329120
  0.20720000   1.82105569
  0.20720000   2.57248440
  0.20720000   2.06611168
  0.20720000   2.68328487
  0.20720000   1.82105999
  0.20720000   2.57248458
  0.20720000   2.06610212
  0.20720000   2.68327983
  0.20720000   1.82106338
  0.20720000   2.57248467
  0.20720000   2.06609455
  0.20720000   2.68327574
  0.20720000   1.82106611
  0.20720000   2.57248469
  0.20740000   2.68433882
  0.20740000   1.81840456
  0.20740000   2.57165251
  0.20740000   2.06775929
  0.20740000   2.68432793
  0.20740000   1.81841196
  0.20740000   2.57165300
  0.20740000   2.06774301
  0.20740000   2.68431982
  0.20740000   1.81841742
  0.20740000   2.57165326
  0.20740000   2.06773085
  0.20740000   2.68431356
  0.20740000   1.81842156
  0.20740000   2.57165335
  0.20740000   2.06772149
  0.20740000   2.68430858
  0.20740000   1.81842483
  0.20740000   2.57165336
  0.20740000   2.06771406
  0.20740000   2.68430453
  0.20740000   1.81842746
  0.20740000   2.57165333
  0.20760000   2.68534997
  0.20760000   1.81580356
  0.20760000   2.57083944
  0.20760000   2.06934145
  0.20760000   2.68533925
  0.20760000   1.81581056
  0.20760000   2.57083965
  0.20760000   2.06932574
  0.20760000   2.68533122
  0.20760000   1.81581584
  0.20760000   2.57083980
  0.20760000   2.06931378
  0.20760000   2.68532503
  0.20760000   1.81581983
  0.20760000   2.57083979
  0.20760000   2.06930461
  0.20760000   2.68532010
  0.20760000   1.81582298
  0.20760000   2.57083974
  0.20760000   2.06929731
  0.20760000   2.68531608
  0.20760000   1.81582552
  0.20760000   2.57083965
  0.20780000   2.68634482
  0.20780000   1.81323729
  0.20780000   2.57004305
  0.20780000   2.07088947
  0.20780000   2.68633419
  0.20780000   1.81324409
  0.20780000   2.57004316
  0.20780000   2.07087396
  0.20780000   2.68632624
  0.20780000   1.81324917
  0.20780000   2.57004318
  0.20780000   2.07086225
  0.20780000   2.68632011
  0.20780000   1.81325303
  0.20780000   2.57004310
  0.20780000   2.07085325
  0.20780000   2.68631523
  0.20780000   1.81325607
  0.20780000   2.57004298
  0.20780000   2.07084608
  0.20780000   2.68631126
  0.20780000   1.81325853
  0.20780000   2.57004284
  0.20800000   2.68732447
  0.20800000   1.81070340
  0.20800000   2.56926198
  0.20800000   2.07240628
  0.20800000   2.68731342
  0.20800000   1.81071111
  0.20800000   2.56926294
  0.20800000   2.07238894
  0.20800000   2.68730569
  0.20800000   1.81071571
  0.20800000   2.56926259
  0.20800000   2.07237801
  0.20800000   2.68729958
  0.20800000   1.81071952
  0.20800000   2.56926249
  0.20800000   2.07236902
  0.20800000   2.68729476
  0.20800000   1.81072244
  0.20800000   2.56926230
  0.20800000   2.07236200
  0.20800000   2.68729081
  0.20800000   1.81072482
  0.20800000   2.56926212
  0.20820000   2.68829037
  0.20820000   1.80819872
  0.20820000   2.56849405
  0.20820000   2.07389653
  0.20820000   2.68827738
  0.20820000   1.80821075
  0.20820000   2.56849881
  0.20820000   2.07387100
  0.20820000   2.68827038
  0.20820000   1.80821373
  0.20820000   2.56849710
  0.20820000   2.07386299
  0.20820000   2.68826411
  0.20820000   1.80821788
  0.20820000   2.56849734
  0.20820000   2.07385327
  0.20820000   2.68825939
  0.20820000   1.80822056
  0.20820000   2.56849695
  0.20820000   2.07384664
  0.20820000   2.68825546
  0.20820000   1.80822291
  0.20820000   2.56849677
  0.20840000   2.68924463
  0.20840000   1.80571866
  0.20840000   2.56773578
  0.20840000   2.07536768
  0.20840000   2.68922608
  0.20840000   1.80574303
  0.20840000   2.56775140
  0.20840000   2.07531885
  0.20840000   2.68922123
  0.20840000   1.80574121
  0.20840000   2.56774553
  0.20840000   2.07531972
  0.20840000   2.68921425
  0.20840000   1.80574695
  0.20840000   2.56774718
  0.20840000   2.07530695
  0.20840000   2.68920985
  0.20840000   1.80574892
  0.20840000   2.56774620
  0.20840000   2.07530158
  0.20840000   2.68920585
  0.20840000   1.80575143
  0.20840000   2.56774618
  0.20860000   2.69019016
  0.20860000   1.80325674
  0.20860000   2.56698188
  0.20860000   2.07683100
  0.20860000   2.69015892
  0.20860000   1.80330938
  0.20860000   2.56702252
  0.20860000   2.07672853
  0.20860000   2.69015947
  0.20860000   1.80329552
  0.20860000   2.56700606
  0.20860000   2.07675208
  0.20860000   2.69015033
  0.20860000   1.80330606
  0.20860000   2.56701198
  0.20860000   2.07673015
  0.20860000   2.69014687
  0.20860000   1.80330594
  0.20860000   2.56700918
  0.20860000   2.07672868
  0.20860000   2.69014253
  0.20860000   1.80330920
  0.20860000   2.56700984
  0.20880000   2.69113086
  0.20880000   1.80080431
  0.20880000   2.56622505
  0.20880000   2.07830219
  0.20880000   2.69107442
  0.20880000   1.80091318
  0.20880000   2.56631573
  0.20880000   2.07809239
  0.20880000   2.69108683
  0.20880000   1.80087287
  0.20880000   2.56627582
  0.20880000   2.07816622
  0.20880000   2.69107232
  0.20880000   1.80089539
  0.20880000   2.56629240
  0.20880000   2.07812141
  0.20880000   2.69107136
  0.20880000   1.80088969
  0.20880000   2.56628467
  0.20880000   2.07813050
  0.20880000   2.69106593
  0.20880000   1.80089537
  0.20880000   2.56628749
  0.20900000   2.69207140
  0.20900000   1.79835097
  0.20900000   2.56545622
  0.20900000   2.07980068
  0.20900000   2.69197012
  0.20900000   1.79856004
  0.20900000   2.56563664
  0.20900000   2.07939839
  0.20900000   2.69200575
  0.20900000   1.79846783
  0.20900000   2.56555035
  0.20900000   2.07957165
  0.20900000   2.69197955
  0.20900000   1.79851644
  0.20900000   2.56559028
  0.20900000   2.07947676
  0.20900000   2.69198451
  0.20900000   1.79849751
  0.20900000   2.56557076
  0.20900000   2.07951112
  0.20900000   2.69197619
  0.20900000   1.79850967
  0.20900000   2.56557938
  0.20920000   2.69301662
  0.20920000   1.79588581
  0.20920000   2.56466563
  0.20920000   2.08134738
  0.20920000   2.69284262
  0.20920000   1.79625765
  0.20920000   2.56499281
  0.20920000   2.08063025
  0.20920000   2.69291955
  0.20920000   1.79607299
  0.20920000   2.56482335
  0.20920000   2.08098192
  0.20920000   2.69287059
  0.20920000   1.79617256
  0.20920000   2.56490913
  0.20920000   2.08078867
  0.20920000   2.69288811
  0.20920000   1.79612552
  0.20920000   2.56486438
  0.20920000   2.08087714
  0.20920000   2.69287301
  0.20920000   1.79615284
  0.20920000   2.56488663
  0.20940000   2.69397059
  0.20940000   1.79339975
  0.20940000   2.56384498
  0.20940000   2.08296017
  0.20940000   2.69368812
  0.20940000   1.79401472
  0.20940000   2.56439283
  0.20940000   2.08176948
  0.20940000   2.69383233
  0.20940000   1.79367925
  0.20940000   2.56408681
  0.20940000   2.08241419
  0.20940000   2.69374302
  0.20940000   1.79386922
  0.20940000   2.56425444
  0.20940000   2.08204530
  0.20940000   2.69378470
  0.20940000   1.79376805
  0.20940000   2.56416076
  0.20940000   2.08223875
  0.20940000   2.69375541
  0.20940000   1.79382714
  0.20940000   2.56421174
  0.20960000   2.69493501
  0.20960000   1.79088891
  0.20960000   2.56299042
  0.20960000   2.08464727
  0.20960000   2.69450339
  0.20960000   1.79183862
  0.20960000   2.56384424
  0.20960000   2.08279981
  0.20960000   2.69474833
  0.20960000   1.79127709
  0.20960000   2.56333215
  0.20960000   2.08388687
  0.20960000   2.69459362
  0.20960000   1.79161375
  0.20960000   2.56363343
  0.20960000   2.08323110
  0.20960000   2.69467770
  0.20960000   1.79141748
  0.20960000   2.56345325
  0.20960000   2.08361021
  0.20960000   2.69462148
  0.20960000   1.79153693
  0.20960000   2.56355914
  0.20980000   2.69590740
  0.20980000   1.78835879
  0.20980000   2.56210666
  0.20980000   2.08639865
  0.20980000   2.69528754
  0.20980000   1.78973146
  0.20980000   2.56334992
  0.20980000   2.08371498
  0.20980000   2.69567071
  0.20980000   1.78885936
  0.20980000   2.56255280
  0.20980000   2.08541413
  0.20980000   2.69541910
  0.20980000   1.78941364
  0.20980000   2.56305366
  0.20980000   2.08432985
  0.20980000   2.69557105
  0.20980000   1.78906495
  0.20980000   2.56273395
  0.20980000   2.08500852
  0.20980000   2.69546843
  0.20980000   1.78928857
  0.20980000   2.56293515
  0.21000000   2.69687881
  0.21000000   1.78582945
  0.21000000   2.56121180
  0.21000000   2.08817548
  0.21000000   2.69604480
  0.21000000   1.78768402
  0.21000000   2.56290233
  0.21000000   2.08453098
  0.21000000   2.69659941
  0.21000000   1.78642621
  0.21000000   2.56174867
  0.21000000   2.08699613
  0.21000000   2.69621779
  0.21000000   1.78727280
  0.21000000   2.56251945
  0.21000000   2.08533212
  0.21000000   2.69646809
  0.21000000   1.78670300
  0.21000000   2.56199601
  0.21000000   2.08644835
  0.21000000   2.69629320
  0.21000000   1.78708906
  0.21000000   2.56234679
  0.21020000   2.69783084
  0.21020000   1.78334224
  0.21020000   2.56034401
  0.21020000   2.08989586
  0.21020000   2.69678849
  0.21020000   1.78566638
  0.21020000   2.56247485
  0.21020000   2.08530491
  0.21020000   2.69752757
  0.21020000   1.78399302
  0.21020000   2.56093373
  0.21020000   2.08860293
  0.21020000   2.69699301
  0.21020000   1.78518389
  0.21020000   2.56202488
  0.21020000   2.08625052
  0.21020000   2.69736887
  0.21020000   1.78433152
  0.21020000   2.56123924
  0.21020000   2.08793017
  0.21020000   2.69709448
  0.21020000   1.78494140
  0.21020000   2.56179749
  0.21040000   2.69873104
  0.21040000   1.78097013
  0.21040000   2.55957162
  0.21040000   2.09141318
  0.21040000   2.69754734
  0.21040000   1.78361397
  0.21040000   2.56200842
  0.21040000   2.08616373
  0.21040000   2.69843587
  0.21040000   1.78160323
  0.21040000   2.56014820
  0.21040000   2.09014819
  0.21040000   2.69775929
  0.21040000   1.78311434
  0.21040000   2.56154062
  0.21040000   2.08714801
  0.21040000   2.69826476
  0.21040000   1.78196986
  0.21040000   2.56048141
  0.21040000   2.08941584
  0.21040000   2.69787768
  0.21040000   1.78283360
  0.21040000   2.56127692
  0.21060000   2.69952597
  0.21060000   1.77883360
  0.21060000   2.55900854
  0.21060000   2.09248285
  0.21060000   2.69837412
  0.21060000   1.78140788
  0.21060000   2.56139256
  0.21060000   2.08734509
  0.21060000   2.69928328
  0.21060000   1.77934922
  0.21060000   2.55947867
  0.21060000   2.09144596
  0.21060000   2.69855310
  0.21060000   1.78098210
  0.21060000   2.56099092
  0.21060000   2.08818741
  0.21060000   2.69912848
  0.21060000   1.77967943
  0.21060000   2.55977976
  0.21060000   2.09078239
  0.21060000   2.69866516
  0.21060000   1.78071538
  0.21060000   2.56073901
  0.21080000   2.70013230
  0.21080000   1.77712080
  0.21080000   2.55883372
  0.21080000   2.09272006
  0.21080000   2.69935421
  0.21080000   1.77885550
  0.21080000   2.56044599
  0.21080000   2.08923922
  0.21080000   2.69999305
  0.21080000   1.77740407
  0.21080000   2.55908873
  0.21080000   2.09214466
  0.21080000   2.69944859
  0.21080000   1.77862000
  0.21080000   2.56021936
  0.21080000   2.08970524
  0.21080000   2.69989658
  0.21080000   1.77760325
  0.21080000   2.55926885
  0.21080000   2.09174068
  0.21080000   2.69951521
  0.21080000   1.77845544
  0.21080000   2.56006134
  0.21100000   2.70043296
  0.21100000   1.77609676
  0.21100000   2.55929981
  0.21100000   2.09157997
  0.21100000   2.70060118
  0.21100000   1.77570040
  0.21100000   2.55892302
  0.21100000   2.09237439
  0.21100000   2.70043794
  0.21100000   1.77605530
  0.21100000   2.55925137
  0.21100000   2.09165647
  0.21100000   2.70056959
  0.21100000   1.77574865
  0.21100000   2.55896086
  0.21100000   2.09227165
  0.21100000   2.70044479
  0.21100000   1.77602186
  0.21100000   2.55921422
  0.21100000   2.09171931
  0.21100000   2.70054695
  0.21100000   1.77578513
  0.21100000   2.55899032
  0.21120000   2.70030008
  0.21120000   1.77605199
  0.21120000   2.56068281
  0.21120000   2.08846311
  0.21120000   2.70220897
  0.21120000   1.77173060
  0.21120000   2.55661151
  0.21120000   2.09720454
  0.21120000   2.70045173
  0.21120000   1.77567952
  0.21120000   2.56032431
  0.21120000   2.08920766
  0.21120000   2.70205790
  0.21120000   1.77204801
  0.21120000   2.55690419
  0.21120000   2.09655454
  0.21120000   2.70058133
  0.21120000   1.77536906
  0.21120000   2.56002747
  0.21120000   2.08982988
  0.21120000   2.70193310
  0.21120000   1.77231468
  0.21120000   2.55715136
  0.21140000   2.69968072
  0.21140000   1.77710881
  0.21140000   2.56309626
  0.21140000   2.08311285
  0.21140000   2.70413990
  0.21140000   1.76703166
  0.21140000   2.55357334
  0.21140000   2.10359138
  0.21140000   2.69993559
  0.21140000   1.77650263
  0.21140000   2.56252027
  0.21140000   2.08432915
  0.21140000   2.70393170
  0.21140000   1.76747745
  0.21140000   2.55399170
  0.21140000   2.10267295
  0.21140000   2.70015476
  0.21140000   1.77598947
  0.21140000   2.56203439
  0.21140000   2.08536107
  0.21140000   2.70375309
  0.21140000   1.76786512
  0.21140000   2.55435680
  0.21160000   2.69873344
  0.21160000   1.77891123
  0.21160000   2.56620072
  0.21160000   2.07624715
  0.21160000   2.70614684
  0.21160000   1.76216214
  0.21160000   2.55032725
  0.21160000   2.11041711
  0.21160000   2.69905779
  0.21160000   1.77814722
  0.21160000   2.56548037
  0.21160000   2.07778010
  0.21160000   2.70593566
  0.21160000   1.76261386
  0.21160000   2.55075580
  0.21160000   2.10947851
  0.21160000   2.69931617
  0.21160000   1.77754484
  0.21160000   2.56491330
  0.21160000   2.07899106
  0.21160000   2.70576346
  0.21160000   1.76298654
  0.21160000   2.55111035
  0.21180000   2.69784504
  0.21180000   1.78058491
  0.21180000   2.56917831
  0.21180000   2.06963069
  0.21180000   2.70793204
  0.21180000   1.75779316
  0.21180000   2.54752282
  0.21180000   2.11629171
  0.21180000   2.69822349
  0.21180000   1.77969777
  0.21180000   2.56834686
  0.21180000   2.07140972
  0.21180000   2.70774173
  0.21180000   1.75819681
  0.21180000   2.54790860
  0.21180000   2.11544590
  0.21180000   2.69848210
  0.21180000   1.77909429
  0.21180000   2.56778101
  0.21180000   2.07262163
  0.21180000   2.70760424
  0.21180000   1.75849075
  0.21180000   2.54818991
  0.21200000   2.69736175
  0.21200000   1.78134476
  0.21200000   2.57130647
  0.21200000   2.06484129
  0.21200000   2.70941035
  0.21200000   1.75411394
  0.21200000   2.54535928
  0.21200000   2.12079442
  0.21200000   2.69767024
  0.21200000   1.78061535
  0.21200000   2.57062267
  0.21200000   2.06630293
  0.21200000   2.70928275
  0.21200000   1.75437616
  0.21200000   2.54560933
  0.21200000   2.12023910
  0.21200000   2.69784955
  0.21200000   1.78019102
  0.21200000   2.57022411
  0.21200000   2.06715365
  0.21200000   2.70920304
  0.21200000   1.75453994
  0.21200000   2.54576532
  0.21220000   2.69750867
  0.21220000   1.78067854
  0.21220000   2.57211766
  0.21220000   2.06291239
  0.21220000   2.71063126
  0.21220000   1.75100948
  0.21220000   2.54373825
  0.21220000   2.12413913
  0.21220000   2.69742252
  0.21220000   1.78084290
  0.21220000   2.57225962
  0.21220000   2.06257462
  0.21220000   2.71063683
  0.21220000   1.75097452
  0.21220000   2.54369668
  0.21220000   2.12420615
  0.21220000   2.69738354
  0.21220000   1.78091291
  0.21220000   2.57231830
  0.21220000   2.06242938
  0.21220000   2.71063591
  0.21220000   1.75096229
  0.21220000   2.54368008
  0.21240000   2.69945004
  0.21240000   1.77594514
  0.21240000   2.56914688
  0.21240000   2.06923141
  0.21240000   2.71119802
  0.21240000   1.74936590
  0.21240000   2.54354847
  0.21240000   2.12443177
  0.21240000   2.69826371
  0.21240000   1.77860314
  0.21240000   2.57161283
  0.21240000   2.06382550
  0.21240000   2.71164075
  0.21240000   1.74835241
  0.21240000   2.54253682
  0.21240000   2.12656819
  0.21240000   2.69744046
  0.21240000   1.78045110
  0.21240000   2.57331884
  0.21240000   2.06008223
  0.21240000   2.71186673
  0.21240000   1.74783527
  0.21240000   2.54201903
  0.21260000   2.70577124
  0.21260000   1.76128657
  0.21260000   2.55665002
  0.21260000   2.09619662
  0.21260000   2.70780028
  0.21260000   1.75667700
  0.21260000   2.55217066
  0.21260000   2.10583641
  0.21260000   2.70531560
  0.21260000   1.76228727
  0.21260000   2.55760581
  0.21260000   2.09410339
  0.21260000   2.70825861
  0.21260000   1.75561716
  0.21260000   2.55112856
  0.21260000   2.10805584
  0.21260000   2.70466563
  0.21260000   1.76374091
  0.21260000   2.55899853
  0.21260000   2.09107434
  0.21260000   2.70889781
  0.21260000   1.75415748
  0.21260000   2.54969490
  0.21280000   2.71351196
  0.21280000   1.74345366
  0.21280000   2.54053976
  0.21280000   2.13064719
  0.21280000   2.69772358
  0.21280000   1.77917683
  0.21280000   2.57500702
  0.21280000   2.05608860
  0.21280000   2.71426973
  0.21280000   1.74173424
  0.21280000   2.53880571
  0.21280000   2.13431333
  0.21280000   2.69616688
  0.21280000   1.78268622
  0.21280000   2.57823689
  0.21280000   2.04898153
  0.21280000   2.71441774
  0.21280000   1.74140092
  0.21280000   2.53846569
  0.21280000   2.13502071
  0.21280000   2.69585073
  0.21280000   1.78338918
  0.21280000   2.57887714
  0.21300000   2.71553752
  0.21300000   1.73858373
  0.21300000   2.53707977
  0.21300000   2.13791466
  0.21300000   2.69552349
  0.21300000   1.78384212
  0.21300000   2.58073298
  0.21300000   2.04334242
  0.21300000   2.71551867
  0.21300000   1.73859486
  0.21300000   2.53708184
  0.21300000   2.13788168
  0.21300000   2.69551924
  0.21300000   1.78382804
  0.21300000   2.58071232
  0.21300000   2.04336604
  0.21300000   2.71550671
  0.21300000   1.73860353
  0.21300000   2.53708509
  0.21300000   2.13785735
  0.21300000   2.69551836
  0.21300000   1.78381510
  0.21300000   2.58069551
  0.21320000   2.71193085
  0.21320000   1.74630919
  0.21320000   2.54627125
  0.21320000   2.11816565
  0.21320000   2.70436996
  0.21320000   1.76342648
  0.21320000   2.56301121
  0.21320000   2.08197118
  0.21320000   2.71374066
  0.21320000   1.74218613
  0.21320000   2.54213897
  0.21320000   2.12698877
  0.21320000   2.70105585
  0.21320000   1.77092463
  0.21320000   2.57014392
  0.21320000   2.06638957
  0.21320000   2.71576285
  0.21320000   1.73761274
  0.21320000   2.53752153
  0.21320000   2.13682466
  0.21320000   2.69689711
  0.21320000   1.78035403
  0.21320000   2.57894275
  0.21340000   2.69696731
  0.21340000   1.77992684
  0.21340000   2.57999842
  0.21340000   2.04462955
  0.21340000   2.71780213
  0.21340000   1.73273348
  0.21340000   2.53401007
  0.21340000   2.14422867
  0.21340000   2.69436499
  0.21340000   1.78580648
  0.21340000   2.58537899
  0.21340000   2.03272303
  0.21340000   2.71735634
  0.21340000   1.73375985
  0.21340000   2.53505271
  0.21340000   2.14199326
  0.21340000   2.69542888
  0.21340000   1.78337020
  0.21340000   2.58314852
  0.21340000   2.03763382
  0.21340000   2.71760274
  0.21340000   1.73316920
  0.21340000   2.53444459
  0.21360000   2.67618569
  0.21360000   1.82771821
  0.21360000   2.62285523
  0.21360000   1.94886954
  0.21360000   2.69814138
  0.21360000   1.77750557
  0.21360000   2.57920779
  0.21360000   2.04622476
  0.21360000   2.71893619
  0.21360000   1.72980758
  0.21360000   2.53245290
  0.21360000   2.14743534
  0.21360000   2.69365791
  0.21360000   1.78708121
  0.21360000   2.58796328
  0.21360000   2.02681074
  0.21360000   2.71805874
  0.21360000   1.73183422
  0.21360000   2.53452691
  0.21360000   2.14301049
  0.21360000   2.69583922
  0.21360000   1.78210475
  0.21360000   2.58341638
  0.21380000   2.53533070
  0.21380000   2.14125482
  0.21380000   2.69762476
  0.21380000   1.77776317
  0.21380000   2.58085601
  0.21380000   2.04237923
  0.21380000   2.72002851
  0.21380000   1.72698787
  0.21380000   2.53099250
  0.21380000   2.15044476
  0.21380000   2.69299051
  0.21380000   1.78827652
  0.21380000   2.59047494
  0.21380000   2.02105274
  0.21380000   2.71864836
  0.21380000   1.73017363
  0.21380000   2.53427041
  0.21380000   2.14346520
  0.21380000   2.69652125
  0.21380000   1.78022926
  0.21380000   2.58312280
  0.21380000   2.03732977
  0.21380000   2.71987057
  0.21400000   2.59112567
  0.21400000   2.01946018
  0.21400000   2.71966228
  0.21400000   1.72756780
  0.21400000   2.53304459
  0.21400000   2.14601394
  0.21400000   2.69617414
  0.21400000   1.78072065
  0.21400000   2.58501737
  0.21400000   2.03298306
  0.21400000   2.72082477
  0.21400000   1.72485257
  0.21400000   2.53022636
  0.21400000   2.15197299
  0.21400000   2.69305213
  0.21400000   1.78780371
  0.21400000   2.59147380
  0.21400000   2.01863335
  0.21400000   2.71953494
  0.21400000   1.72781652
  0.21400000   2.53328853
  0.21400000   2.14545417
  0.21400000   2.69642806
  0.21420000   2.53094024
  0.21420000   2.15040684
  0.21420000   2.69479626
  0.21420000   1.78354444
  0.21420000   2.58904453
  0.21420000   2.02387616
  0.21420000   2.72129523
  0.21420000   1.72348103
  0.21420000   2.53025410
  0.21420000   2.15183945
  0.21420000   2.69401038
  0.21420000   1.78530829
  0.21420000   2.59064416
  0.21420000   2.02029589
  0.21420000   2.72090907
  0.21420000   1.72435091
  0.21420000   2.53115207
  0.21420000   2.14991323
  0.21420000   2.69502444
  0.21420000   1.78298323
  0.21420000   2.58851725
  0.21420000   2.02500795
  0.21420000   2.72137912
  0.21440000   2.53711099
  0.21440000   2.13716993
  0.21440000   2.70228334
  0.21440000   1.76617610
  0.21440000   2.57426929
  0.21440000   2.05639667
  0.21440000   2.72308431
  0.21440000   1.71896945
  0.21440000   2.52699103
  0.21440000   2.15867011
  0.21440000   2.69106883
  0.21440000   1.79168389
  0.21440000   2.59782510
  0.21440000   2.00409104
  0.21440000   2.71970981
  0.21440000   1.72679385
  0.21440000   2.53513162
  0.21440000   2.14134652
  0.21440000   2.70026384
  0.21440000   1.77072904
  0.21440000   2.57856948
  0.21440000   2.04686817
  0.21440000   2.72339144
  0.21460000   2.52496357
  0.21460000   2.16292013
  0.21460000   2.68944242
  0.21460000   1.79509816
  0.21460000   2.60230161
  0.21460000   1.99389462
  0.21460000   2.71886129
  0.21460000   1.72844257
  0.21460000   2.53828806
  0.21460000   2.13451654
  0.21460000   2.70439671
  0.21460000   1.76100722
  0.21460000   2.57074891
  0.21460000   2.06395980
  0.21460000   2.72358463
  0.21460000   1.71744692
  0.21460000   2.52683675
  0.21460000   2.15889511
  0.21460000   2.69178441
  0.21460000   1.78971581
  0.21460000   2.59748531
  0.21460000   2.00463371
  0.21460000   2.72100159
  0.21480000   2.56365984
  0.21480000   2.07940839
  0.21480000   2.72259766
  0.21480000   1.71934453
  0.21480000   2.53028579
  0.21480000   2.15151313
  0.21480000   2.69682866
  0.21480000   1.77792420
  0.21480000   2.58817274
  0.21480000   2.02523822
  0.21480000   2.72490733
  0.21480000   1.71422010
  0.21480000   2.52489456
  0.21480000   2.16294704
  0.21480000   2.69024500
  0.21480000   1.79291393
  0.21480000   2.60177897
  0.21480000   1.99482556
  0.21480000   2.72027015
  0.21480000   1.72486336
  0.21480000   2.53603110
  0.21480000   2.13922371
  0.21480000   2.70309968
  0.21500000   2.61054887
  0.21500000   1.97495691
  0.21500000   2.71636800
  0.21500000   1.73353150
  0.21500000   2.54640798
  0.21500000   2.11683436
  0.21500000   2.71353005
  0.21500000   1.73956624
  0.21500000   2.55250660
  0.21500000   2.10357536
  0.21500000   2.71791219
  0.21500000   1.72959105
  0.21500000   2.54235357
  0.21500000   2.12553582
  0.21500000   2.71012689
  0.21500000   1.74728168
  0.21500000   2.56021254
  0.21500000   2.08675538
  0.21500000   2.72219005
  0.21500000   1.71987012
  0.21500000   2.53227361
  0.21500000   2.14714351
  0.21500000   2.70001833
  0.21520000   2.57063354
  0.21520000   2.06378067
  0.21520000   2.72688763
  0.21520000   1.70894069
  0.21520000   2.52220138
  0.21520000   2.16851664
  0.21520000   2.68847753
  0.21520000   1.79632998
  0.21520000   2.60767130
  0.21520000   1.98118616
  0.21520000   2.71938553
  0.21520000   1.72626636
  0.21520000   2.54039090
  0.21520000   2.12967814
  0.21520000   2.70932093
  0.21520000   1.74878601
  0.21520000   2.56314944
  0.21520000   2.08018310
  0.21520000   2.72453223
  0.21520000   1.71421478
  0.21520000   2.52778303
  0.21520000   2.15662931
  0.21520000   2.69567608
  0.21540000   2.53221324
  0.21540000   2.14715165
  0.21540000   2.70183483
  0.21540000   1.76554770
  0.21540000   2.58087399
  0.21540000   2.04093575
  0.21540000   2.72907325
  0.21540000   1.70367553
  0.21540000   2.51801715
  0.21540000   2.17727712
  0.21540000   2.68347241
  0.21540000   1.80742981
  0.21540000   2.61871974
  0.21540000   1.95601782
  0.21540000   2.71249029
  0.21540000   1.74174201
  0.21540000   2.55760168
  0.21540000   2.09221689
  0.21540000   2.72300962
  0.21540000   1.71731851
  0.21540000   2.53250475
  0.21540000   2.14646854
  0.21540000   2.70215410
  0.21560000   2.53157354
  0.21560000   2.14842875
  0.21560000   2.70204022
  0.21560000   1.76475147
  0.21560000   2.58155805
  0.21560000   2.03924005
  0.21560000   2.73019402
  0.21560000   1.70078742
  0.21560000   2.51635988
  0.21560000   2.18070804
  0.21560000   2.68187867
  0.21560000   1.81075899
  0.21560000   2.62296819
  0.21560000   1.94616184
  0.21560000   2.70991183
  0.21560000   1.74733481
  0.21560000   2.56462819
  0.21560000   2.07667530
  0.21560000   2.72726708
  0.21560000   1.70732303
  0.21560000   2.52337095
  0.21560000   2.16585100
  0.21560000   2.69181556
  0.21580000   2.57691014
  0.21580000   2.04940876
  0.21580000   2.73119690
  0.21580000   1.69814754
  0.21580000   2.51496139
  0.21580000   2.18360625
  0.21580000   2.68060155
  0.21580000   1.81337947
  0.21580000   2.62659684
  0.21580000   1.93769906
  0.21580000   2.70761054
  0.21580000   1.75230449
  0.21580000   2.57097996
  0.21580000   2.06253250
  0.21580000   2.73026232
  0.21580000   1.70020969
  0.21580000   2.51718461
  0.21580000   2.17888622
  0.21580000   2.68395373
  0.21580000   1.80569254
  0.21580000   2.62008056
  0.21580000   1.95245968
  0.21580000   2.71370021
  0.21600000   2.63241362
  0.21600000   1.92425797
  0.21600000   2.70267574
  0.21600000   1.76333975
  0.21600000   2.58312555
  0.21600000   2.03544007
  0.21600000   2.73241656
  0.21600000   1.69506595
  0.21600000   2.51306582
  0.21600000   2.18753197
  0.21600000   2.67847782
  0.21600000   1.81791730
  0.21600000   2.63178224
  0.21600000   1.92565404
  0.21600000   2.70333797
  0.21600000   1.76178431
  0.21600000   2.58162376
  0.21600000   2.03875154
  0.21600000   2.73245669
  0.21600000   1.69493705
  0.21600000   2.51291735
  0.21600000   2.18781722
  0.21600000   2.67824343
  0.21620000   2.56139103
  0.21620000   2.08336763
  0.21620000   2.72917355
  0.21620000   1.70197478
  0.21620000   2.52200949
  0.21620000   2.16855629
  0.21620000   2.69261297
  0.21620000   1.78529756
  0.21620000   2.60498273
  0.21620000   1.98617774
  0.21620000   2.72686683
  0.21620000   1.70750203
  0.21620000   2.52794171
  0.21620000   2.15590707
  0.21620000   2.70043710
  0.21620000   1.76740057
  0.21620000   2.58839637
  0.21620000   2.02341457
  0.21620000   2.73291225
  0.21620000   1.69359473
  0.21620000   2.51290945
  0.21620000   2.18777742
  0.21620000   2.67905216
  0.21640000   2.52575136
  0.21640000   2.16054801
  0.21640000   2.69854470
  0.21640000   1.77143785
  0.21640000   2.59365607
  0.21640000   2.01147376
  0.21640000   2.73285005
  0.21640000   1.69346010
  0.21640000   2.51422922
  0.21640000   2.18496856
  0.21640000   2.68196110
  0.21640000   1.80933802
  0.21640000   2.62746771
  0.21640000   1.93498811
  0.21640000   2.71032603
  0.21640000   1.74511235
  0.21640000   2.56822336
  0.21640000   2.06814517
  0.21640000   2.73283910
  0.21640000   1.69329548
  0.21640000   2.51403775
  0.21640000   2.18533838
  0.21640000   2.68166416
  0.21660000   2.61780825
  0.21660000   1.95680829
  0.21660000   2.72049739
  0.21660000   1.72150421
  0.21660000   2.54564081
  0.21660000   2.11757296
  0.21660000   2.72096361
  0.21660000   1.71993207
  0.21660000   2.54397929
  0.21660000   2.12113729
  0.21660000   2.71952370
  0.21660000   1.72319163
  0.21660000   2.54736915
  0.21660000   2.11374898
  0.21660000   2.72238522
  0.21660000   1.71666563
  0.21660000   2.54054952
  0.21660000   2.12855266
  0.21660000   2.71634091
  0.21660000   1.73042596
  0.21660000   2.55482435
  0.21660000   2.09744404
  0.21660000   2.72770947
  0.21680000   2.56252580
  0.21680000   2.08047531
  0.21680000   2.73291758
  0.21680000   1.69244344
  0.21680000   2.51603484
  0.21680000   2.18103611
  0.21680000   2.68644482
  0.21680000   1.79846801
  0.21680000   2.62099731
  0.21680000   1.94924545
  0.21680000   2.71891178
  0.21680000   1.72477963
  0.21680000   2.55049022
  0.21680000   2.10685056
  0.21680000   2.72580740
  0.21680000   1.70854539
  0.21680000   2.53341586
  0.21680000   2.14386431
  0.21680000   2.70978371
  0.21680000   1.74505652
  0.21680000   2.57104690
  0.21680000   2.06153118
  0.21680000   2.73579640
  0.21700000   2.53334062
  0.21700000   2.14398131
  0.21700000   2.71065126
  0.21700000   1.74278642
  0.21700000   2.57025118
  0.21700000   2.06317702
  0.21700000   2.73672371
  0.21700000   1.68346036
  0.21700000   2.50759132
  0.21700000   2.19878088
  0.21700000   2.67343247
  0.21700000   1.82794786
  0.21700000   2.64698801
  0.21700000   1.88964374
  0.21700000   2.69038827
  0.21700000   1.78998999
  0.21700000   2.61498450
  0.21700000   1.96271347
  0.21700000   2.72508349
  0.21700000   1.71029793
  0.21700000   2.53675314
  0.21700000   2.13658823
  0.21700000   2.71441813
  0.21720000   2.66332428
  0.21720000   1.85192504
  0.21720000   2.66666761
  0.21720000   1.84428664
  0.21720000   2.66105371
  0.21720000   1.85719190
  0.21720000   2.67044463
  0.21720000   1.83560431
  0.21720000   2.65445831
  0.21720000   1.87233007
  0.21720000   2.68081019
  0.21720000   1.81175327
  0.21720000   2.63525727
  0.21720000   1.91630891
  0.21720000   2.70666831
  0.21720000   1.75226901
  0.21720000   2.58110127
  0.21720000   2.03887311
  0.21720000   2.73929016
  0.21720000   1.67733931
  0.21720000   2.50222659
  0.21720000   2.20997198
  0.21720000   2.66457283
  0.21740000   2.50755648
  0.21740000   2.19880152
  0.21740000   2.67493932
  0.21740000   1.82392802
  0.21740000   2.64662610
  0.21740000   1.88997473
  0.21740000   2.69332990
  0.21740000   1.78263674
  0.21740000   2.61124666
  0.21740000   1.97077431
  0.21740000   2.73018242
  0.21740000   1.69797812
  0.21740000   2.52645172
  0.21740000   2.15861071
  0.21740000   2.70398096
  0.21740000   1.75735536
  0.21740000   2.58747172
  0.21740000   2.02437278
  0.21740000   2.73998547
  0.21740000   1.67544549
  0.21740000   2.50156354
  0.21740000   2.21132036
  0.21740000   2.66408211
  0.21760000   2.70882239
  0.21760000   1.74673375
  0.21760000   2.57857472
  0.21760000   2.04421423
  0.21760000   2.74148670
  0.21760000   1.67167826
  0.21760000   2.49879376
  0.21760000   2.21711151
  0.21760000   2.65952411
  0.21760000   1.85894568
  0.21760000   2.67439925
  0.21760000   1.82584339
  0.21760000   2.64961375
  0.21760000   1.88288416
  0.21760000   2.69034580
  0.21760000   1.78919181
  0.21760000   2.61859332
  0.21760000   1.95383771
  0.21760000   2.72581026
  0.21760000   1.70766674
  0.21760000   2.53833566
  0.21760000   2.13285722
  0.21760000   2.71899467
  0.21780000   2.66637448
  0.21780000   1.84298924
  0.21780000   2.66425088
  0.21780000   1.84894589
  0.21780000   2.66870326
  0.21780000   1.83874614
  0.21780000   2.66110166
  0.21780000   1.85624417
  0.21780000   2.67396154
  0.21780000   1.82664315
  0.21780000   2.65168496
  0.21780000   1.87788695
  0.21780000   2.68856667
  0.21780000   1.79299921
  0.21780000   2.62341949
  0.21780000   1.94261521
  0.21780000   2.72275534
  0.21780000   1.71436002
  0.21780000   2.54690114
  0.21780000   2.11408624
  0.21780000   2.72808519
  0.21780000   1.70164437
  0.21780000   2.53332209
  0.21800000   2.70315328
  0.21800000   1.75831904
  0.21800000   2.59277285
  0.21800000   2.01191845
  0.21800000   2.74243151
  0.21800000   1.66892923
  0.21800000   2.49861039
  0.21800000   2.21743729
  0.21800000   2.66060886
  0.21800000   1.85588885
  0.21800000   2.67503692
  0.21800000   1.82379347
  0.21800000   2.65081599
  0.21800000   1.87959039
  0.21800000   2.69102233
  0.21800000   1.78702774
  0.21800000   2.61953864
  0.21800000   1.95122568
  0.21800000   2.72741966
  0.21800000   1.70332973
  0.21800000   2.53661677
  0.21800000   2.13638389
  0.21800000   2.71908880
  0.21820000   2.74493372
  0.21820000   1.66286173
  0.21820000   2.49317004
  0.21820000   2.22876912
  0.21820000   2.65031943
  0.21820000   1.87921047
  0.21820000   2.69209320
  0.21820000   1.78420193
  0.21820000   2.61843301
  0.21820000   1.95351744
  0.21820000   2.72955662
  0.21820000   1.69811493
  0.21820000   2.53245443
  0.21820000   2.14532199
  0.21820000   2.71525656
  0.21820000   1.73025066
  0.21820000   2.56631335
  0.21820000   2.07095878
  0.21820000   2.74205697
  0.21820000   1.66923194
  0.21820000   2.50040380
  0.21820000   2.21360861
  0.21820000   2.66483538
  0.21840000   2.73292717
  0.21840000   1.69009361
  0.21840000   2.52517456
  0.21840000   2.16098139
  0.21840000   2.70677326
  0.21840000   1.74936710
  0.21840000   2.58696211
  0.21840000   2.02461919
  0.21840000   2.74584486
  0.21840000   1.66043657
  0.21840000   2.49184986
  0.21840000   2.23146976
  0.21840000   2.64823210
  0.21840000   1.88369780
  0.21840000   2.69626679
  0.21840000   1.77425813
  0.21840000   2.61076603
  0.21840000   1.97073969
  0.21840000   2.73646101
  0.21840000   1.68195021
  0.21840000   2.51615877
  0.21840000   2.18025476
  0.21840000   2.69337255
  0.21860000   2.73944342
  0.21860000   1.67484194
  0.21860000   2.50968909
  0.21860000   2.19401081
  0.21860000   2.68341170
  0.21860000   1.80266464
  0.21860000   2.63754146
  0.21860000   1.90927261
  0.21860000   2.71238733
  0.21860000   1.73690909
  0.21860000   2.57603233
  0.21860000   2.04901741
  0.21860000   2.74684152
  0.21860000   1.65775942
  0.21860000   2.49023511
  0.21860000   2.23480043
  0.21860000   2.64545339
  0.21860000   1.88978953
  0.21860000   2.70133245
  0.21860000   1.76227064
  0.21860000   2.60093391
  0.21860000   1.99285584
  0.21860000   2.74308153
  0.21880000   2.73738829
  0.21880000   1.67881618
  0.21880000   2.51559975
  0.21880000   2.18134481
  0.21880000   2.69417030
  0.21880000   1.77763435
  0.21880000   2.61675918
  0.21880000   1.95661913
  0.21880000   2.73450743
  0.21880000   1.68579346
  0.21880000   2.52336069
  0.21880000   2.16469995
  0.21880000   2.70600511
  0.21880000   1.75045753
  0.21880000   2.59094061
  0.21880000   2.01525100
  0.21880000   2.74750448
  0.21880000   1.65599494
  0.21880000   2.48966577
  0.21880000   2.23596592
  0.21880000   2.64487571
  0.21880000   1.89083947
  0.21880000   2.70331981
  0.21900000   2.63592428
  0.21900000   1.91114893
  0.21900000   2.71598904
  0.21900000   1.72794062
  0.21900000   2.56982303
  0.21900000   2.06257956
  0.21900000   2.74768074
  0.21900000   1.65514321
  0.21900000   2.49015141
  0.21900000   2.23496105
  0.21900000   2.64658400
  0.21900000   1.88667311
  0.21900000   2.70220465
  0.21900000   1.75965373
  0.21900000   2.60134355
  0.21900000   1.99152819
  0.21900000   2.74527881
  0.21900000   1.66079396
  0.21900000   2.49665666
  0.21900000   2.22137095
  0.21900000   2.66027289
  0.21900000   1.85521996
  0.21900000   2.68155204
  0.21920000   2.72919379
  0.21920000   1.69738465
  0.21920000   2.53901039
  0.21920000   2.13060443
  0.21920000   2.72751996
  0.21920000   1.70060288
  0.21920000   2.54246880
  0.21920000   2.12297456
  0.21920000   2.73108045
  0.21920000   1.69245932
  0.21920000   2.53361422
  0.21920000   2.14230092
  0.21920000   2.72138701
  0.21920000   1.71457494
  0.21920000   2.55735842
  0.21920000   2.09011328
  0.21920000   2.74301102
  0.21920000   1.66531695
  0.21920000   2.50328664
  0.21920000   2.20736456
  0.21920000   2.67408648
  0.21920000   1.82315916
  0.21920000   2.65879870
  0.21940000   2.58034408
  0.21940000   2.03864865
  0.21940000   2.75182633
  0.21940000   1.64513436
  0.21940000   2.48144675
  0.21940000   2.25300193
  0.21940000   2.62810493
  0.21940000   1.92851659
  0.21940000   2.72708307
  0.21940000   1.70178015
  0.21940000   2.54521240
  0.21940000   2.11683781
  0.21940000   2.73469438
  0.21940000   1.68387758
  0.21940000   2.52562777
  0.21940000   2.15952873
  0.21940000   2.71191807
  0.21940000   1.73591454
  0.21940000   2.58084417
  0.21940000   2.03746026
  0.21940000   2.75181604
  0.21940000   1.64511215
  0.21940000   2.48140852
  0.21960000   2.63863279
  0.21960000   1.90553329
  0.21960000   2.71715367
  0.21960000   1.72438537
  0.21960000   2.57056537
  0.21960000   2.06046364
  0.21960000   2.75124201
  0.21960000   1.64605247
  0.21960000   2.48398469
  0.21960000   2.24774645
  0.21960000   2.63463592
  0.21960000   1.91329744
  0.21960000   2.72110454
  0.21960000   1.71519030
  0.21960000   2.56095720
  0.21960000   2.08186514
  0.21960000   2.74722624
  0.21960000   1.65508137
  0.21960000   2.49447565
  0.21960000   2.22585448
  0.21960000   2.65785802
  0.21960000   1.85992586
  0.21960000   2.68903374
  0.21980000   2.72665664
  0.21980000   1.70223887
  0.21980000   2.54866542
  0.21980000   2.10904389
  0.21980000   2.73979535
  0.21980000   1.67162696
  0.21980000   2.51486460
  0.21980000   2.18259646
  0.21980000   2.69715290
  0.21980000   1.76920193
  0.21980000   2.61619638
  0.21980000   1.95677077
  0.21980000   2.74097213
  0.21980000   1.66936412
  0.21980000   2.51230936
  0.21980000   2.18807285
  0.21980000   2.69281070
  0.21980000   1.77917661
  0.21980000   2.62541234
  0.21980000   1.93562782
  0.21980000   2.73291468
  0.21980000   1.68780980
  0.21980000   2.53292896
  0.22000000   2.70060586
  0.22000000   1.76097586
  0.22000000   2.60988351
  0.22000000   1.97101616
  0.22000000   2.74664421
  0.22000000   1.65608915
  0.22000000   2.49859634
  0.22000000   2.21718684
  0.22000000   2.66778174
  0.22000000   1.83653945
  0.22000000   2.67492531
  0.22000000   1.82117091
  0.22000000   2.66297344
  0.22000000   1.84885891
  0.22000000   2.68410935
  0.22000000   1.80000067
  0.22000000   2.64537190
  0.22000000   1.88951655
  0.22000000   2.71084431
  0.22000000   1.73826490
  0.22000000   2.58764126
  0.22000000   2.02163725
  0.22000000   2.75504074
  0.22020000   2.47795389
  0.22020000   2.26026548
  0.22020000   2.62196667
  0.22020000   1.94161340
  0.22020000   2.73790353
  0.22020000   1.67568802
  0.22020000   2.52238731
  0.22020000   2.16626050
  0.22020000   2.71078564
  0.22020000   1.73723868
  0.22020000   2.58804628
  0.22020000   2.02049004
  0.22020000   2.75614649
  0.22020000   1.63400435
  0.22020000   2.47418295
  0.22020000   2.26796722
  0.22020000   2.61259858
  0.22020000   1.96298310
  0.22020000   2.74541890
  0.22020000   1.65844936
  0.22020000   2.50277218
  0.22020000   2.20826189
  0.22020000   2.67685668
  0.22040000   2.66723051
  0.22040000   1.83844418
  0.22040000   2.67926904
  0.22040000   1.81063740
  0.22040000   2.65725566
  0.22040000   1.86157143
  0.22040000   2.69585110
  0.22040000   1.77228808
  0.22040000   2.62348877
  0.22040000   1.93943735
  0.22040000   2.73845194
  0.22040000   1.67419294
  0.22040000   2.52218629
  0.22040000   2.16663382
  0.22040000   2.71135890
  0.22040000   1.73559964
  0.22040000   2.58785907
  0.22040000   2.02072300
  0.22040000   2.75732860
  0.22040000   1.63098169
  0.22040000   2.47205217
  0.22040000   2.27234973
  0.22040000   2.60768628
  0.22060000   2.63072323
  0.22060000   1.92106312
  0.22060000   2.73162128
  0.22060000   1.68946449
  0.22060000   2.54064751
  0.22060000   2.12622565
  0.22060000   2.73615164
  0.22060000   1.67855147
  0.22060000   2.52853308
  0.22060000   2.15272792
  0.22060000   2.72141327
  0.22060000   1.71221246
  0.22060000   2.56515429
  0.22060000   2.07173326
  0.22060000   2.75473222
  0.22060000   1.63638335
  0.22060000   2.47993984
  0.22060000   2.25611652
  0.22060000   2.62797845
  0.22060000   1.92730238
  0.22060000   2.73446804
  0.22060000   1.68288228
  0.22060000   2.53336025
  0.22080000   2.59798822
  0.22080000   1.99739393
  0.22080000   2.75733888
  0.22080000   1.63040120
  0.22080000   2.47431126
  0.22080000   2.26780274
  0.22080000   2.61447216
  0.22080000   1.95805113
  0.22080000   2.74770542
  0.22080000   1.65228181
  0.22080000   2.50006660
  0.22080000   2.21391889
  0.22080000   2.67368558
  0.22080000   1.82174682
  0.22080000   2.66910206
  0.22080000   1.83350033
  0.22080000   2.67834235
  0.22080000   1.81216108
  0.22080000   2.66137676
  0.22080000   1.85145586
  0.22080000   2.69160514
  0.22080000   1.78147390
  0.22080000   2.63480878
  0.22100000   2.47185874
  0.22100000   2.27285646
  0.22100000   2.60868289
  0.22100000   1.97106610
  0.22100000   2.75284258
  0.22100000   1.64023659
  0.22100000   2.48744405
  0.22100000   2.24051096
  0.22100000   2.64696654
  0.22100000   1.88312418
  0.22100000   2.71380789
  0.22100000   1.72979380
  0.22100000   2.58639244
  0.22100000   2.02353522
  0.22100000   2.76096836
  0.22100000   1.62173532
  0.22100000   2.46537208
  0.22100000   2.28609158
  0.22100000   2.59145816
  0.22100000   2.01025259
  0.22100000   2.75996272
  0.22100000   1.62394103
  0.22100000   2.46801836
  0.22120000   2.55374410
  0.22120000   2.09687527
  0.22120000   2.75113091
  0.22120000   1.64352295
  0.22120000   2.49278757
  0.22120000   2.22927874
  0.22120000   2.65967004
  0.22120000   1.85355138
  0.22120000   2.69583655
  0.22120000   1.77102316
  0.22120000   2.62813152
  0.22120000   1.92778045
  0.22120000   2.73877862
  0.22120000   1.67214704
  0.22120000   2.52577778
  0.22120000   2.15850609
  0.22120000   2.72025975
  0.22120000   1.71387661
  0.22120000   2.57132800
  0.22120000   2.05738995
  0.22120000   2.76037739
  0.22120000   1.62262508
  0.22120000   2.46790989
  0.22140000   2.69738299
  0.22140000   1.76622052
  0.22140000   2.62507948
  0.22140000   1.93456356
  0.22140000   2.74302136
  0.22140000   1.66212887
  0.22140000   2.51586432
  0.22140000   2.17997296
  0.22140000   2.70553160
  0.22140000   1.74741539
  0.22140000   2.60697872
  0.22140000   1.97614762
  0.22140000   2.75677824
  0.22140000   1.63069672
  0.22140000   2.47907276
  0.22140000   2.25797592
  0.22140000   2.62809364
  0.22140000   1.92607146
  0.22140000   2.73922998
  0.22140000   1.67069264
  0.22140000   2.52559861
  0.22140000   2.15877928
  0.22140000   2.72090845
  0.22160000   2.75220892
  0.22160000   1.64074742
  0.22160000   2.49247565
  0.22160000   2.22991419
  0.22160000   2.66031776
  0.22160000   1.85150484
  0.22160000   2.69721529
  0.22160000   1.76723681
  0.22160000   2.62752029
  0.22160000   1.92872171
  0.22160000   2.74184910
  0.22160000   1.66448054
  0.22160000   2.52002779
  0.22160000   2.17086734
  0.22160000   2.71325477
  0.22160000   1.72931805
  0.22160000   2.59029922
  0.22160000   2.01405471
  0.22160000   2.76400142
  0.22160000   1.61389497
  0.22160000   2.46028017
  0.22160000   2.29656850
  0.22160000   2.57862884
  0.22180000   2.57673691
  0.22180000   2.04288694
  0.22180000   2.76505056
  0.22180000   1.61104460
  0.22180000   2.45827269
  0.22180000   2.30069199
  0.22180000   2.57331939
  0.22180000   2.05056947
  0.22180000   2.76434948
  0.22180000   1.61258100
  0.22180000   2.46014181
  0.22180000   2.29687832
  0.22180000   2.57865560
  0.22180000   2.03850207
  0.22180000   2.76528235
  0.22180000   1.61049660
  0.22180000   2.45759434
  0.22180000   2.30202920
  0.22180000   2.57139387
  0.22180000   2.05487617
  0.22180000   2.76381836
  0.22180000   1.61374116
  0.22180000   2.46154893
  0.22200000   2.48185698
  0.22200000   2.25221963
  0.22200000   2.63669673
  0.22200000   1.90554379
  0.22200000   2.73331637
  0.22200000   1.68333754
  0.22200000   2.54421837
  0.22200000   2.11753982
  0.22200000   2.74685233
  0.22200000   1.65185393
  0.22200000   2.50842076
  0.22200000   2.19580567
  0.22200000   2.69465704
  0.22200000   1.77153206
  0.22200000   2.63440592
  0.22200000   1.91226594
  0.22200000   2.73681675
  0.22200000   1.67535104
  0.22200000   2.53529726
  0.22200000   2.13726266
  0.22200000   2.73680409
  0.22200000   1.67471050
  0.22200000   2.53455646
  0.22220000   2.56584777
  0.22220000   2.06711102
  0.22220000   2.76405255
  0.22220000   1.61256759
  0.22220000   2.46307443
  0.22220000   2.29102148
  0.22220000   2.58772326
  0.22220000   2.01759602
  0.22220000   2.76761406
  0.22220000   1.60465364
  0.22220000   2.45337524
  0.22220000   2.31069001
  0.22220000   2.55978468
  0.22220000   2.08065479
  0.22220000   2.76089572
  0.22220000   1.61961768
  0.22220000   2.47162941
  0.22220000   2.27340028
  0.22220000   2.61111472
  0.22220000   1.96411908
  0.22220000   2.75849177
  0.22220000   1.62540861
  0.22220000   2.47862140
  0.22240000   2.73634871
  0.22240000   1.67513689
  0.22240000   2.53801039
  0.22240000   2.13106580
  0.22240000   2.74204148
  0.22240000   1.66213805
  0.22240000   2.52325141
  0.22240000   2.16351374
  0.22240000   2.72187529
  0.22240000   1.70823807
  0.22240000   2.57422533
  0.22240000   2.04988232
  0.22240000   2.76794219
  0.22240000   1.60357935
  0.22240000   2.45352791
  0.22240000   2.31045927
  0.22240000   2.56055247
  0.22240000   2.07878845
  0.22240000   2.76242988
  0.22240000   1.61582140
  0.22240000   2.46849821
  0.22240000   2.27988430
  0.22240000   2.60317838
  0.22260000   2.75947619
  0.22260000   1.62217975
  0.22260000   2.47768640
  0.22260000   2.26090176
  0.22260000   2.62795649
  0.22260000   1.92494015
  0.22260000   2.74671660
  0.22260000   1.65166294
  0.22260000   2.51264448
  0.22260000   2.18653740
  0.22260000   2.70488542
  0.22260000   1.74700558
  0.22260000   2.61539152
  0.22260000   1.95549294
  0.22260000   2.75855594
  0.22260000   1.62473334
  0.22260000   2.48077359
  0.22260000   2.25446691
  0.22260000   2.63575034
  0.22260000   1.90692998
  0.22260000   2.73807975
  0.22260000   1.67141766
  0.22260000   2.53529683
  0.22280000   2.76161484
  0.22280000   1.61702028
  0.22280000   2.47291578
  0.22280000   2.27084533
  0.22280000   2.61602362
  0.22280000   1.95220151
  0.22280000   2.75865545
  0.22280000   1.62411661
  0.22280000   2.48150457
  0.22280000   2.25293196
  0.22280000   2.63816681
  0.22280000   1.90109836
  0.22280000   2.73639331
  0.22280000   1.67498017
  0.22280000   2.54079940
  0.22280000   2.12465263
  0.22280000   2.74720452
  0.22280000   1.64969991
  0.22280000   2.51182605
  0.22280000   2.18821359
  0.22280000   2.70422267
  0.22280000   1.74820299
  0.22280000   2.61803217
  0.22300000   2.77032862
  0.22300000   1.59723411
  0.22300000   2.45010399
  0.22300000   2.31760210
  0.22300000   2.55119284
  0.22300000   2.09934948
  0.22300000   2.75904527
  0.22300000   1.62245771
  0.22300000   2.48097037
  0.22300000   2.25402332
  0.22300000   2.63743298
  0.22300000   1.90253459
  0.22300000   2.73851418
  0.22300000   1.66979639
  0.22300000   2.53643006
  0.22300000   2.13423644
  0.22300000   2.74303626
  0.22300000   1.65885150
  0.22300000   2.52391241
  0.22300000   2.16179514
  0.22300000   2.72557966
  0.22300000   1.69874596
  0.22300000   2.56848101
  0.22320000   2.63301193
  0.22320000   1.91257406
  0.22320000   2.74498879
  0.22320000   1.65469266
  0.22320000   2.52061493
  0.22320000   2.16900830
  0.22320000   2.72119053
  0.22320000   1.70853971
  0.22320000   2.58047194
  0.22320000   2.03501754
  0.22320000   2.77362117
  0.22320000   1.58953109
  0.22320000   2.44196750
  0.22320000   2.33395662
  0.22320000   2.52623574
  0.22320000   2.15448132
  0.22320000   2.73120923
  0.22320000   1.68541047
  0.22320000   2.55536860
  0.22320000   2.09178703
  0.22320000   2.76290689
  0.22320000   1.61348042
  0.22320000   2.47155528
  0.22340000   2.77271007
  0.22340000   1.59123148
  0.22340000   2.44557260
  0.22340000   2.32686470
  0.22340000   2.53777351
  0.22340000   2.12896691
  0.22340000   2.74752329
  0.22340000   1.64789141
  0.22340000   2.51415588
  0.22340000   2.18296385
  0.22340000   2.71094659
  0.22340000   1.73176893
  0.22340000   2.60607669
  0.22340000   1.97610265
  0.22340000   2.76931450
  0.22340000   1.59904913
  0.22340000   2.45529564
  0.22340000   2.30719059
  0.22340000   2.56748427
  0.22340000   2.06241181
  0.22340000   2.77139009
  0.22340000   1.59401564
  0.22340000   2.44902378
  0.22360000   2.51902108
  0.22360000   2.17014263
  0.22360000   2.72168269
  0.22360000   1.70664885
  0.22360000   2.58141304
  0.22360000   2.03249370
  0.22360000   2.77601229
  0.22360000   1.58351038
  0.22360000   2.43734943
  0.22360000   2.34332510
  0.22360000   2.51185553
  0.22360000   2.18571232
  0.22360000   2.70913506
  0.22360000   1.73550922
  0.22360000   2.61131841
  0.22360000   1.96376065
  0.22360000   2.76744259
  0.22360000   1.60296207
  0.22360000   2.46160932
  0.22360000   2.29432711
  0.22360000   2.58641629
  0.22360000   2.01922672
  0.22360000   2.77590281
  0.22380000   2.72028361
  0.22380000   1.70956228
  0.22380000   2.58599776
  0.22380000   2.02184566
  0.22380000   2.77731073
  0.22380000   1.58031300
  0.22380000   2.43478834
  0.22380000   2.34850911
  0.22380000   2.50366522
  0.22380000   2.20337664
  0.22380000   2.69406620
  0.22380000   1.77002990
  0.22380000   2.64617839
  0.22380000   1.88267062
  0.22380000   2.73295944
  0.22380000   1.68136315
  0.22380000   2.55537166
  0.22380000   2.09146117
  0.22380000   2.76609964
  0.22380000   1.60531540
  0.22380000   2.46598214
  0.22380000   2.28533562
  0.22380000   2.59936791
  0.22400000   2.64430668
  0.22400000   1.88693835
  0.22400000   2.73688841
  0.22400000   1.67209909
  0.22400000   2.54648614
  0.22400000   2.11134570
  0.22400000   2.75929622
  0.22400000   1.62035499
  0.22400000   2.48583952
  0.22400000   2.24378113
  0.22400000   2.65251476
  0.22400000   1.86629532
  0.22400000   2.72411461
  0.22400000   1.70136798
  0.22400000   2.57875944
  0.22400000   2.03826261
  0.22400000   2.77800244
  0.22400000   1.57838467
  0.22400000   2.43381465
  0.22400000   2.35051900
  0.22400000   2.50061926
  0.22400000   2.20986837
  0.22400000   2.68850725
  0.22420000   2.76863924
  0.22420000   1.59928991
  0.22420000   2.46150282
  0.22420000   2.29471252
  0.22420000   2.58730110
  0.22420000   2.01667843
  0.22420000   2.77938689
  0.22420000   1.57493654
  0.22420000   2.43090729
  0.22420000   2.35635997
  0.22420000   2.49110572
  0.22420000   2.23020955
  0.22420000   2.66807685
  0.22420000   1.82971810
  0.22420000   2.69965857
  0.22420000   1.75763132
  0.22420000   2.63750196
  0.22420000   1.90242700
  0.22420000   2.74673126
  0.22420000   1.64916927
  0.22420000   2.52161258
  0.22420000   2.16641951
  0.22420000   2.72721512
  0.22440000   2.48959293
  0.22440000   2.23344690
  0.22440000   2.66517580
  0.22440000   1.83620986
  0.22440000   2.70598979
  0.22440000   1.74266762
  0.22440000   2.62443119
  0.22440000   1.93259435
  0.22440000   2.76203132
  0.22440000   1.61401538
  0.22440000   2.48110382
  0.22440000   2.25382103
  0.22440000   2.64176295
  0.22440000   1.89073468
  0.22440000   2.74168403
  0.22440000   1.66033544
  0.22440000   2.53603413
  0.22440000   2.13440113
  0.22440000   2.74931764
  0.22440000   1.64226852
  0.22440000   2.51498525
  0.22440000   2.18084208
  0.22440000   2.71661364
  0.22460000   2.67105748
  0.22460000   1.82380375
  0.22460000   2.69809115
  0.22460000   1.76085332
  0.22460000   2.64355110
  0.22460000   1.88792874
  0.22460000   2.74159535
  0.22460000   1.66035254
  0.22460000   2.53756078
  0.22460000   2.13094993
  0.22460000   2.75222786
  0.22460000   1.63536576
  0.22460000   2.50830644
  0.22460000   2.19538776
  0.22460000   2.70472498
  0.22460000   1.74428398
  0.22460000   2.62747262
  0.22460000   1.92523784
  0.22460000   2.76028255
  0.22460000   1.61765381
  0.22460000   2.48701465
  0.22460000   2.24126223
  0.22460000   2.65725545
  0.22480000   2.61101449
  0.22480000   1.96322806
  0.22480000   2.77498892
  0.22480000   1.58408368
  0.22480000   2.44691961
  0.22480000   2.32469505
  0.22480000   2.54380040
  0.22480000   2.11472718
  0.22480000   2.76131980
  0.22480000   1.61433248
  0.22480000   2.48443325
  0.22480000   2.24669169
  0.22480000   2.65148231
  0.22480000   1.86760616
  0.22480000   2.73056076
  0.22480000   1.68526148
  0.22480000   2.56713484
  0.22480000   2.06409836
  0.22480000   2.77884865
  0.22480000   1.57511756
  0.22480000   2.43555226
  0.22480000   2.34747374
  0.22480000   2.50694251
  0.22500000   2.63956727
  0.22500000   1.89664048
  0.22500000   2.74916181
  0.22500000   1.64240097
  0.22500000   2.51963505
  0.22500000   2.17051509
  0.22500000   2.72738374
  0.22500000   1.69145884
  0.22500000   2.57543157
  0.22500000   2.04499963
  0.22500000   2.78303834
  0.22500000   1.56550134
  0.22500000   2.42474192
  0.22500000   2.36896632
  0.22500000   2.47047155
  0.22500000   2.27375153
  0.22500000   2.61764605
  0.22500000   1.94577899
  0.22500000   2.77072885
  0.22500000   1.59323347
  0.22500000   2.45986158
  0.22500000   2.29821260
  0.22500000   2.58406599
  0.22520000   2.77945769
  0.22520000   1.57303080
  0.22520000   2.43584323
  0.22520000   2.34710879
  0.22520000   2.50821051
  0.22520000   2.19316385
  0.22520000   2.70868191
  0.22520000   1.73409069
  0.22520000   2.62174748
  0.22520000   1.93783218
  0.22520000   2.76933545
  0.22520000   1.59619923
  0.22520000   2.46505566
  0.22520000   2.28753759
  0.22520000   2.59974814
  0.22520000   1.98708046
  0.22520000   2.78253107
  0.22520000   1.56636947
  0.22520000   2.42731930
  0.22520000   2.36399433
  0.22520000   2.47940175
  0.22520000   2.25497257
  0.22520000   2.64225717
  0.22540000   2.55116126
  0.22540000   2.09784507
  0.22540000   2.77163082
  0.22540000   1.59018427
  0.22540000   2.45900855
  0.22540000   2.30009153
  0.22540000   2.58226483
  0.22540000   2.02708381
  0.22540000   2.78642184
  0.22540000   1.55727207
  0.22540000   2.41706917
  0.22540000   2.38416983
  0.22540000   2.44375212
  0.22540000   2.32875533
  0.22540000   2.53804718
  0.22540000   2.12704570
  0.22540000   2.75773785
  0.22540000   1.62138766
  0.22540000   2.49745476
  0.22540000   2.21867962
  0.22540000   2.68468569
  0.22540000   1.78950594
  0.22540000   2.67543984
  0.22560000   2.41457575
  0.22560000   2.38917017
  0.22560000   2.43484054
  0.22560000   2.34676261
  0.22560000   2.50899364
  0.22560000   2.19117640
  0.22560000   2.71192269
  0.22560000   1.72594613
  0.22560000   2.61643775
  0.22560000   1.94971316
  0.22560000   2.77610044
  0.22560000   1.58031218
  0.22560000   2.44805393
  0.22560000   2.32265254
  0.22560000   2.54849766
  0.22560000   2.10365483
  0.22560000   2.77019774
  0.22560000   1.59302571
  0.22560000   2.46403583
  0.22560000   2.28965766
  0.22560000   2.59768386
  0.22560000   1.99140183
  0.22560000   2.78563278
  0.22580000   2.75391424
  0.22580000   1.62945191
  0.22580000   2.51016250
  0.22580000   2.19097435
  0.22580000   2.71321642
  0.22580000   1.72281368
  0.22580000   2.61472986
  0.22580000   1.95351778
  0.22580000   2.77861225
  0.22580000   1.57437933
  0.22580000   2.44199732
  0.22580000   2.33504227
  0.22580000   2.52909128
  0.22580000   2.14697255
  0.22580000   2.74747918
  0.22580000   1.64407184
  0.22580000   2.52752504
  0.22580000   2.15260384
  0.22580000   2.74389981
  0.22580000   1.65232857
  0.22580000   2.53719260
  0.22580000   2.13103846
  0.22580000   2.75763094
  0.22600000   2.46103848
  0.22600000   2.29355169
  0.22600000   2.59272210
  0.22600000   2.00233712
  0.22600000   2.78927091
  0.22600000   1.55003519
  0.22600000   2.41207782
  0.22600000   2.39426879
  0.22600000   2.42576678
  0.22600000   2.36494952
  0.22600000   2.47837803
  0.22600000   2.25698488
  0.22600000   2.64196676
  0.22600000   1.88801183
  0.22600000   2.75115091
  0.22600000   1.63613010
  0.22600000   2.51963848
  0.22600000   2.17005227
  0.22600000   2.73175254
  0.22600000   1.67980051
  0.22600000   2.56999947
  0.22600000   2.05657237
  0.22600000   2.78684456
  0.22620000   2.57319596
  0.22620000   2.04718830
  0.22620000   2.78931046
  0.22620000   1.54955632
  0.22620000   2.41292820
  0.22620000   2.39280136
  0.22620000   2.42871750
  0.22620000   2.35924629
  0.22620000   2.48861402
  0.22620000   2.23516240
  0.22620000   2.66882972
  0.22620000   1.82513148
  0.22620000   2.71052305
  0.22620000   1.72942273
  0.22620000   2.62449661
  0.22620000   1.93034688
  0.22620000   2.77306531
  0.22620000   1.58624282
  0.22620000   2.45998925
  0.22620000   2.29826643
  0.22620000   2.58671896
  0.22620000   2.01610249
  0.22620000   2.79117264
  0.22640000   2.48323349
  0.22640000   2.24929483
  0.22640000   2.65314633
  0.22640000   1.86166798
  0.22640000   2.73800529
  0.22640000   1.66571816
  0.22640000   2.55713630
  0.22640000   2.08571982
  0.22640000   2.78138184
  0.22640000   1.56688259
  0.22640000   2.43683228
  0.22640000   2.34572132
  0.22640000   2.51244182
  0.22640000   2.18352909
  0.22640000   2.72182223
  0.22640000   1.70190021
  0.22640000   2.59717693
  0.22640000   1.99359910
  0.22640000   2.79098785
  0.22640000   1.54572585
  0.22640000   2.40939324
  0.22640000   2.39977408
  0.22640000   2.41580935
  0.22660000   2.68551795
  0.22660000   1.78725201
  0.22660000   2.68235797
  0.22660000   1.79463462
  0.22660000   2.68875086
  0.22660000   1.77970307
  0.22660000   2.67566789
  0.22660000   1.81026604
  0.22660000   2.70178812
  0.22660000   1.74930708
  0.22660000   2.64727067
  0.22660000   1.87671526
  0.22660000   2.74892417
  0.22660000   1.64047280
  0.22660000   2.52929676
  0.22660000   2.14840911
  0.22660000   2.75029761
  0.22660000   1.63652771
  0.22660000   2.52459297
  0.22660000   2.15883233
  0.22660000   2.74285200
  0.22660000   1.65346986
  0.22660000   2.54450297
  0.22680000   2.44990762
  0.22680000   2.31663137
  0.22680000   2.55980975
  0.22680000   2.07705651
  0.22680000   2.78594532
  0.22680000   1.55594937
  0.22680000   2.42565249
  0.22680000   2.36823420
  0.22680000   2.47407505
  0.22680000   2.26628244
  0.22680000   2.63227311
  0.22680000   1.90965682
  0.22680000   2.76789150
  0.22680000   1.59688045
  0.22680000   2.47776986
  0.22680000   2.26089462
  0.22680000   2.63966192
  0.22680000   1.89256184
  0.22680000   2.75922284
  0.22680000   1.61655955
  0.22680000   2.50204347
  0.22680000   2.20852331
  0.22680000   2.70001633
  0.22700000   2.13834754
  0.22700000   2.75870625
  0.22700000   1.61684940
  0.22700000   2.50389425
  0.22700000   2.20445996
  0.22700000   2.70484053
  0.22700000   1.74039809
  0.22700000   2.64145310
  0.22700000   1.88975257
  0.22700000   2.75918892
  0.22700000   1.61644691
  0.22700000   2.50341432
  0.22700000   2.20553515
  0.22700000   2.70376656
  0.22700000   1.74287928
  0.22700000   2.64389963
  0.22700000   1.88400813
  0.22700000   2.75595957
  0.22700000   1.62377839
  0.22700000   2.51231383
  0.22700000   2.18595604
  0.22700000   2.72230490
  0.22700000   1.69999557
  0.22720000   2.78711121
  0.22720000   1.55290453
  0.22720000   2.42466245
  0.22720000   2.37051536
  0.22720000   2.47056900
  0.22720000   2.27376402
  0.22720000   2.62334707
  0.22720000   1.93002027
  0.22720000   2.77944344
  0.22720000   1.57027264
  0.22720000   2.44709528
  0.22720000   2.32517072
  0.22720000   2.54752538
  0.22720000   2.10482049
  0.22720000   2.77754969
  0.22720000   1.57400253
  0.22720000   2.45185503
  0.22720000   2.31532068
  0.22720000   2.56305297
  0.22720000   2.06949646
  0.22720000   2.79022722
  0.22720000   1.54585132
  0.22720000   2.41542840
  0.22740000   1.55395591
  0.22740000   2.42750532
  0.22740000   2.36497041
  0.22740000   2.48069901
  0.22740000   2.25222970
  0.22740000   2.65202886
  0.22740000   1.86279138
  0.22740000   2.74575908
  0.22740000   1.64635379
  0.22740000   2.54220259
  0.22740000   2.11893853
  0.22740000   2.77181810
  0.22740000   1.58663700
  0.22740000   2.46938772
  0.22740000   2.27873723
  0.22740000   2.61739565
  0.22740000   1.94379183
  0.22740000   2.78579015
  0.22740000   1.55578282
  0.22740000   2.42987327
  0.22740000   2.36019566
  0.22740000   2.48907247
  0.22740000   2.23419504
  0.22760000   2.05826965
  0.22760000   2.79510601
  0.22760000   1.53453390
  0.22760000   2.40347886
  0.22760000   2.41215126
  0.22760000   2.39307650
  0.22760000   2.42921943
  0.22760000   2.35888892
  0.22760000   2.49115847
  0.22760000   2.22948747
  0.22760000   2.67973712
  0.22760000   1.79771219
  0.22760000   2.69857376
  0.22760000   1.75516859
  0.22760000   2.66031442
  0.22760000   1.84479794
  0.22760000   2.73517452
  0.22760000   1.67045163
  0.22760000   2.57151105
  0.22760000   2.05191729
  0.22760000   2.79653410
  0.22760000   1.53147891
  0.22760000   2.39943035
  0.22780000   2.71782936
  0.22780000   1.70898480
  0.22780000   2.61521706
  0.22780000   1.95019408
  0.22780000   2.79058703
  0.22780000   1.54461058
  0.22780000   2.41824447
  0.22780000   2.38361043
  0.22780000   2.44744304
  0.22780000   2.32210907
  0.22780000   2.55313719
  0.22780000   2.09153880
  0.22780000   2.78610042
  0.22780000   1.55401108
  0.22780000   2.43051234
  0.22780000   2.35908641
  0.22780000   2.49155510
  0.22780000   2.22876449
  0.22780000   2.68125729
  0.22780000   1.79390987
  0.22780000   2.69681592
  0.22780000   1.75898514
  0.22780000   2.66542708
  0.22800000   2.53119340
  0.22800000   2.14113184
  0.22800000   2.76102904
  0.22800000   1.60986856
  0.22800000   2.50280267
  0.22800000   2.20657948
  0.22800000   2.70622597
  0.22800000   1.73566668
  0.22800000   2.64419565
  0.22800000   1.88207739
  0.22800000   2.76182054
  0.22800000   1.60894626
  0.22800000   2.50169345
  0.22800000   2.20908903
  0.22800000   2.70367223
  0.22800000   1.74160400
  0.22800000   2.65009288
  0.22800000   1.86823152
  0.22800000   2.75354468
  0.22800000   1.62776003
  0.22800000   2.52460354
  0.22800000   2.15827268
  0.22800000   2.74916990
  0.22820000   2.35853761
  0.22820000   2.49282976
  0.22820000   2.22589967
  0.22820000   2.68580435
  0.22820000   1.78275785
  0.22820000   2.69008506
  0.22820000   1.77417380
  0.22820000   2.68247277
  0.22820000   1.79208063
  0.22820000   2.69829029
  0.22820000   1.75512262
  0.22820000   2.66476065
  0.22820000   1.83363651
  0.22820000   2.73147382
  0.22820000   1.67810854
  0.22820000   2.58464647
  0.22820000   2.02108863
  0.22820000   2.80313269
  0.22820000   1.51617821
  0.22820000   2.38340001
  0.22820000   2.45065534
  0.22820000   2.31598513
  0.22820000   2.56372802
  0.22840000   1.58541467
  0.22840000   2.47528915
  0.22840000   2.26626133
  0.22840000   2.63699362
  0.22840000   1.89684904
  0.22840000   2.77253141
  0.22840000   1.58405410
  0.22840000   2.47358149
  0.22840000   2.26995408
  0.22840000   2.63202782
  0.22840000   1.90847250
  0.22840000   2.77825599
  0.22840000   1.57117630
  0.22840000   2.45716561
  0.22840000   2.30466527
  0.22840000   2.58198447
  0.22840000   2.02501487
  0.22840000   2.80393345
  0.22840000   1.51399079
  0.22840000   2.38191080
  0.22840000   2.45359512
  0.22840000   2.30990982
  0.22840000   2.57360070
  0.22860000   2.45692054
  0.22860000   2.30250469
  0.22860000   2.58523176
  0.22860000   2.01713961
  0.22860000   2.80531762
  0.22860000   1.51066418
  0.22860000   2.37888808
  0.22860000   2.45941088
  0.22860000   2.29781227
  0.22860000   2.59245930
  0.22860000   2.00044685
  0.22860000   2.80488300
  0.22860000   1.51167057
  0.22860000   2.38024684
  0.22860000   2.45690190
  0.22860000   2.30306180
  0.22860000   2.58453477
  0.22860000   2.01881271
  0.22860000   2.80529639
  0.22860000   1.51070405
  0.22860000   2.37893882
  0.22860000   2.45929990
  0.22860000   2.29802472
  0.22880000   2.33968174
  0.22880000   2.52654307
  0.22880000   2.15129071
  0.22880000   2.75747597
  0.22880000   1.61668098
  0.22880000   2.51714759
  0.22880000   2.17457250
  0.22880000   2.73927985
  0.22880000   1.65822414
  0.22880000   2.56652607
  0.22880000   2.06241485
  0.22880000   2.80087552
  0.22880000   1.52010748
  0.22880000   2.39307284
  0.22880000   2.43312368
  0.22880000   2.35213222
  0.22880000   2.50484133
  0.22880000   2.19942175
  0.22880000   2.71591439
  0.22880000   1.71184663
  0.22880000   2.62572232
  0.22880000   1.92442431
  0.22880000   2.78803679
  0.22900000   1.69538737
  0.22900000   2.60971580
  0.22900000   1.96190599
  0.22900000   2.80158820
  0.22900000   1.51857237
  0.22900000   2.39249311
  0.22900000   2.43447851
  0.22900000   2.34952091
  0.22900000   2.50970518
  0.22900000   2.18864265
  0.22900000   2.72708616
  0.22900000   1.68577573
  0.22900000   2.59913171
  0.22900000   1.98650664
  0.22900000   2.80614072
  0.22900000   1.50848709
  0.22900000   2.37888080
  0.22900000   2.45992387
  0.22900000   2.29682762
  0.22900000   2.59482985
  0.22900000   1.99454718
  0.22900000   2.80685031
  0.22900000   1.50680130
  0.22920000   2.27599543
  0.22920000   2.62551124
  0.22920000   1.92271709
  0.22920000   2.78992565
  0.22920000   1.54395256
  0.22920000   2.42771983
  0.22920000   2.36556987
  0.22920000   2.48199996
  0.22920000   2.24936402
  0.22920000   2.66083552
  0.22920000   1.83978894
  0.22920000   2.74300782
  0.22920000   1.64994806
  0.22920000   2.55994190
  0.22920000   2.07731038
  0.22920000   2.79872207
  0.22920000   1.52419962
  0.22920000   2.40149408
  0.22920000   2.41735816
  0.22920000   2.38395573
  0.22920000   2.44792334
  0.22920000   2.32141648
  0.22920000   2.55682471
  0.22940000   1.84820986
  0.22940000   2.75036222
  0.22940000   1.63289530
  0.22940000   2.54129432
  0.22940000   2.11992384
  0.22940000   2.78074290
  0.22940000   1.56362877
  0.22940000   2.45488539
  0.22940000   2.30970498
  0.22940000   2.57632249
  0.22940000   2.03725657
  0.22940000   2.80864196
  0.22940000   1.50223727
  0.22940000   2.37332004
  0.22940000   2.47060932
  0.22940000   2.27422193
  0.22940000   2.62844925
  0.22940000   1.91555173
  0.22940000   2.78823086
  0.22940000   1.54739520
  0.22940000   2.43372010
  0.22940000   2.35346987
  0.22940000   2.50371372
  0.22960000   1.51703851
  0.22960000   2.39484380
  0.22960000   2.43060159
  0.22960000   2.35770458
  0.22960000   2.49626608
  0.22960000   2.21815507
  0.22960000   2.69906541
  0.22960000   1.74981976
  0.22960000   2.67003839
  0.22960000   1.81925965
[truncated: 210,211 more chars]
