# Supplementary material for: Bifurcations of a New Fractional-Order System with a One-Scroll Chaotic Attractor
Source: Hindawi journal article supplement (doi:10.1155/2019/8341514), 2019-01-01
Supplement: f1 [file 8341514.f1.zip › 8341514.f1/q1-bifurcationdata/q1dataq093.dat]

  0.90000000   1.81496756
  0.90000000   1.81553822
  0.90000000   1.81590765
  0.90000000   1.81614584
  0.90000000   1.81629866
  0.90000000   1.81639609
  0.90000000   1.81645767
  0.90000000   1.81649610
  0.90000000   1.81651963
  0.90000000   1.81653361
  0.90000000   1.81654151
  0.90000000   1.81654557
  0.90000000   1.81654721
  0.90000000   1.81654738
  0.90000000   1.81654665
  0.90000000   1.81654541
  0.90000000   1.81654389
  0.90000000   1.81654224
  0.90000000   1.81654055
  0.90000000   1.81653887
  0.90000000   1.81653724
  0.90000000   1.81653568
  0.90000000   1.81653418
  0.90010000   1.81770702
  0.90010000   1.81823011
  0.90010000   1.81856658
  0.90010000   1.81878207
  0.90010000   1.81891933
  0.90010000   1.81900614
  0.90010000   1.81906050
  0.90010000   1.81909403
  0.90010000   1.81911425
  0.90010000   1.81912601
  0.90010000   1.81913241
  0.90010000   1.81913547
  0.90010000   1.81913645
  0.90010000   1.81913617
  0.90010000   1.81913515
  0.90010000   1.81913372
  0.90010000   1.81913208
  0.90010000   1.81913035
  0.90010000   1.81912860
  0.90010000   1.81912690
  0.90010000   1.81912525
  0.90010000   1.81912367
  0.90010000   1.81912216
  0.90020000   1.82041022
  0.90020000   1.82088914
  0.90020000   1.82119521
  0.90020000   1.82138988
  0.90020000   1.82151295
  0.90020000   1.82159014
  0.90020000   1.82163798
  0.90020000   1.82166712
  0.90020000   1.82168440
  0.90020000   1.82169418
  0.90020000   1.82169928
  0.90020000   1.82170146
  0.90020000   1.82170186
  0.90020000   1.82170120
  0.90020000   1.82169993
  0.90020000   1.82169834
  0.90020000   1.82169659
  0.90020000   1.82169479
  0.90020000   1.82169301
  0.90020000   1.82169128
  0.90020000   1.82168961
  0.90020000   1.82168802
  0.90020000   1.82168652
  0.90030000   1.82307846
  0.90030000   1.82351644
  0.90030000   1.82379448
  0.90030000   1.82397007
  0.90030000   1.82408023
  0.90030000   1.82414869
  0.90030000   1.82419068
  0.90030000   1.82421589
  0.90030000   1.82423055
  0.90030000   1.82423859
  0.90030000   1.82424253
  0.90030000   1.82424395
  0.90030000   1.82424385
  0.90030000   1.82424286
  0.90030000   1.82424139
  0.90030000   1.82423965
  0.90030000   1.82423782
  0.90030000   1.82423597
  0.90030000   1.82423415
  0.90030000   1.82423240
  0.90030000   1.82423072
  0.90030000   1.82422913
  0.90030000   1.82422761
  0.90040000   1.82571299
  0.90040000   1.82611303
  0.90040000   1.82636528
  0.90040000   1.82652342
  0.90040000   1.82662182
  0.90040000   1.82668240
  0.90040000   1.82671912
  0.90040000   1.82674083
  0.90040000   1.82675316
  0.90040000   1.82675967
  0.90040000   1.82676259
  0.90040000   1.82676334
  0.90040000   1.82676281
  0.90040000   1.82676155
  0.90040000   1.82675989
  0.90040000   1.82675804
  0.90040000   1.82675613
  0.90040000   1.82675423
  0.90040000   1.82675239
  0.90040000   1.82675062
  0.90040000   1.82674894
  0.90040000   1.82674734
  0.90040000   1.82674583
  0.90050000   1.82831498
  0.90050000   1.82867993
  0.90050000   1.82890845
  0.90050000   1.82905064
  0.90050000   1.82913837
  0.90050000   1.82919183
  0.90050000   1.82922382
  0.90050000   1.82924240
  0.90050000   1.82925267
  0.90050000   1.82925782
  0.90050000   1.82925985
  0.90050000   1.82926003
  0.90050000   1.82925912
  0.90050000   1.82925762
  0.90050000   1.82925581
  0.90050000   1.82925386
  0.90050000   1.82925189
  0.90050000   1.82924996
  0.90050000   1.82924809
  0.90050000   1.82924631
  0.90050000   1.82924462
  0.90050000   1.82924302
  0.90050000   1.82924151
  0.90060000   1.83088555
  0.90060000   1.83121808
  0.90060000   1.83142480
  0.90060000   1.83155243
  0.90060000   1.83163046
  0.90060000   1.83167750
  0.90060000   1.83170525
  0.90060000   1.83172105
  0.90060000   1.83172949
  0.90060000   1.83173344
  0.90060000   1.83173471
  0.90060000   1.83173438
  0.90060000   1.83173316
  0.90060000   1.83173145
  0.90060000   1.83172950
  0.90060000   1.83172748
  0.90060000   1.83172546
  0.90060000   1.83172350
  0.90060000   1.83172162
  0.90060000   1.83171983
  0.90060000   1.83171813
  0.90060000   1.83171653
  0.90060000   1.83171502
  0.90070000   1.83342576
  0.90070000   1.83372835
  0.90070000   1.83391509
  0.90070000   1.83402943
  0.90070000   1.83409868
  0.90070000   1.83413994
  0.90070000   1.83416389
  0.90070000   1.83417720
  0.90070000   1.83418403
  0.90070000   1.83418694
  0.90070000   1.83418753
  0.90070000   1.83418677
  0.90070000   1.83418527
  0.90070000   1.83418338
  0.90070000   1.83418133
  0.90070000   1.83417924
  0.90070000   1.83417718
  0.90070000   1.83417520
  0.90070000   1.83417330
  0.90070000   1.83417151
  0.90070000   1.83416981
  0.90070000   1.83416821
  0.90070000   1.83416669
  0.90080000   1.83593662
  0.90080000   1.83621161
  0.90080000   1.83638002
  0.90080000   1.83648227
  0.90080000   1.83654356
  0.90080000   1.83657961
  0.90080000   1.83660017
  0.90080000   1.83661128
  0.90080000   1.83661668
  0.90080000   1.83661868
  0.90080000   1.83661868
  0.90080000   1.83661755
  0.90080000   1.83661581
  0.90080000   1.83661377
  0.90080000   1.83661163
  0.90080000   1.83660949
  0.90080000   1.83660740
  0.90080000   1.83660539
  0.90080000   1.83660349
  0.90080000   1.83660169
  0.90080000   1.83659999
  0.90080000   1.83659839
  0.90080000   1.83659688
  0.90090000   1.83841908
  0.90090000   1.83866864
  0.90090000   1.83882028
  0.90090000   1.83891152
  0.90090000   1.83896563
  0.90090000   1.83899700
  0.90090000   1.83901452
  0.90090000   1.83902368
  0.90090000   1.83902782
  0.90090000   1.83902902
  0.90090000   1.83902851
  0.90090000   1.83902705
  0.90090000   1.83902511
  0.90090000   1.83902296
  0.90090000   1.83902074
  0.90090000   1.83901855
  0.90090000   1.83901643
  0.90090000   1.83901442
  0.90090000   1.83901250
  0.90090000   1.83901070
  0.90090000   1.83900900
  0.90090000   1.83900740
  0.90090000   1.83900589
  0.90100000   1.84087405
  0.90100000   1.84110021
  0.90100000   1.84123651
  0.90100000   1.84131775
  0.90100000   1.84136536
  0.90100000   1.84139253
  0.90100000   1.84140736
  0.90100000   1.84141478
  0.90100000   1.84141782
  0.90100000   1.84141831
  0.90100000   1.84141736
  0.90100000   1.84141563
  0.90100000   1.84141352
  0.90100000   1.84141126
  0.90100000   1.84140898
  0.90100000   1.84140675
  0.90100000   1.84140462
  0.90100000   1.84140259
  0.90100000   1.84140067
  0.90100000   1.84139887
  0.90100000   1.84139717
  0.90100000   1.84139557
  0.90100000   1.84139406
  0.90110000   1.84330237
  0.90110000   1.84350703
  0.90110000   1.84362932
  0.90110000   1.84370148
  0.90110000   1.84374323
  0.90110000   1.84376665
  0.90110000   1.84377906
  0.90110000   1.84378495
  0.90110000   1.84378702
  0.90110000   1.84378690
  0.90110000   1.84378557
  0.90110000   1.84378360
  0.90110000   1.84378135
  0.90110000   1.84377900
  0.90110000   1.84377667
  0.90110000   1.84377441
  0.90110000   1.84377226
  0.90110000   1.84377022
  0.90110000   1.84376830
  0.90110000   1.84376650
  0.90110000   1.84376480
  0.90110000   1.84376320
  0.90110000   1.84376170
  0.90120000   1.84570487
  0.90120000   1.84588978
  0.90120000   1.84599929
  0.90120000   1.84606322
  0.90120000   1.84609969
  0.90120000   1.84611974
  0.90120000   1.84613002
  0.90120000   1.84613455
  0.90120000   1.84613577
  0.90120000   1.84613512
  0.90120000   1.84613346
  0.90120000   1.84613129
  0.90120000   1.84612891
  0.90120000   1.84612649
  0.90120000   1.84612412
  0.90120000   1.84612184
  0.90120000   1.84611967
  0.90120000   1.84611763
  0.90120000   1.84611571
  0.90120000   1.84611391
  0.90120000   1.84611221
  0.90120000   1.84611062
  0.90120000   1.84610912
  0.90130000   1.84808230
  0.90130000   1.84824910
  0.90130000   1.84834697
  0.90130000   1.84840344
  0.90130000   1.84843517
  0.90130000   1.84845220
  0.90130000   1.84846058
  0.90130000   1.84846393
  0.90130000   1.84846440
  0.90130000   1.84846329
  0.90130000   1.84846134
  0.90130000   1.84845900
  0.90130000   1.84845652
  0.90130000   1.84845404
  0.90130000   1.84845163
  0.90130000   1.84844934
  0.90130000   1.84844716
  0.90130000   1.84844512
  0.90130000   1.84844320
  0.90130000   1.84844140
  0.90130000   1.84843970
  0.90130000   1.84843811
  0.90130000   1.84843661
  0.90140000   1.85043540
  0.90140000   1.85058561
  0.90140000   1.85067287
  0.90140000   1.85072260
  0.90140000   1.85075006
  0.90140000   1.85076441
  0.90140000   1.85077111
  0.90140000   1.85077340
  0.90140000   1.85077323
  0.90140000   1.85077172
  0.90140000   1.85076953
  0.90140000   1.85076704
  0.90140000   1.85076448
  0.90140000   1.85076195
  0.90140000   1.85075951
  0.90140000   1.85075720
  0.90140000   1.85075502
  0.90140000   1.85075297
  0.90140000   1.85075106
  0.90140000   1.85074925
  0.90140000   1.85074756
  0.90140000   1.85074597
  0.90140000   1.85074448
  0.90150000   1.85276485
  0.90150000   1.85289988
  0.90150000   1.85297750
  0.90150000   1.85302114
  0.90150000   1.85304477
  0.90150000   1.85305673
  0.90150000   1.85306193
  0.90150000   1.85306331
  0.90150000   1.85306256
  0.90150000   1.85306071
  0.90150000   1.85305831
  0.90150000   1.85305570
  0.90150000   1.85305307
  0.90150000   1.85305050
  0.90150000   1.85304804
  0.90150000   1.85304572
  0.90150000   1.85304354
  0.90150000   1.85304149
  0.90150000   1.85303957
  0.90150000   1.85303777
  0.90150000   1.85303609
  0.90150000   1.85303450
  0.90150000   1.85303300
  0.90160000   1.85507130
  0.90160000   1.85519245
  0.90160000   1.85526132
  0.90160000   1.85529947
  0.90160000   1.85531967
  0.90160000   1.85532949
  0.90160000   1.85533338
  0.90160000   1.85533395
  0.90160000   1.85533271
  0.90160000   1.85533056
  0.90160000   1.85532799
  0.90160000   1.85532528
  0.90160000   1.85532258
  0.90160000   1.85531998
  0.90160000   1.85531751
  0.90160000   1.85531518
  0.90160000   1.85531299
  0.90160000   1.85531095
  0.90160000   1.85530903
  0.90160000   1.85530724
  0.90160000   1.85530555
  0.90160000   1.85530397
  0.90160000   1.85530247
  0.90170000   1.85735538
  0.90170000   1.85746386
  0.90170000   1.85752479
  0.90170000   1.85755798
  0.90170000   1.85757512
  0.90170000   1.85758304
  0.90170000   1.85758577
  0.90170000   1.85758563
  0.90170000   1.85758397
  0.90170000   1.85758156
  0.90170000   1.85757884
  0.90170000   1.85757604
  0.90170000   1.85757330
  0.90170000   1.85757067
  0.90170000   1.85756819
  0.90170000   1.85756585
  0.90170000   1.85756367
  0.90170000   1.85756162
  0.90170000   1.85755971
  0.90170000   1.85755792
  0.90170000   1.85755624
  0.90170000   1.85755465
  0.90170000   1.85755317
  0.90180000   1.85961768
  0.90180000   1.85971460
  0.90180000   1.85976833
  0.90180000   1.85979707
  0.90180000   1.85981146
  0.90180000   1.85981770
  0.90180000   1.85981941
  0.90180000   1.85981865
  0.90180000   1.85981662
  0.90180000   1.85981399
  0.90180000   1.85981114
  0.90180000   1.85980828
  0.90180000   1.85980549
  0.90180000   1.85980285
  0.90180000   1.85980035
  0.90180000   1.85979802
  0.90180000   1.85979583
  0.90180000   1.85979379
  0.90180000   1.85979188
  0.90180000   1.85979009
  0.90180000   1.85978841
  0.90180000   1.85978683
  0.90180000   1.85978535
  0.90190000   1.86185873
  0.90190000   1.86194513
  0.90190000   1.86199235
  0.90190000   1.86201708
  0.90190000   1.86202902
  0.90190000   1.86203378
  0.90190000   1.86203458
  0.90190000   1.86203329
  0.90190000   1.86203094
  0.90190000   1.86202813
  0.90190000   1.86202517
  0.90190000   1.86202225
  0.90190000   1.86201943
  0.90190000   1.86201677
  0.90190000   1.86201427
  0.90190000   1.86201193
  0.90190000   1.86200975
  0.90190000   1.86200771
  0.90190000   1.86200581
  0.90190000   1.86200402
  0.90190000   1.86200234
  0.90190000   1.86200077
  0.90190000   1.86199928
  0.90200000   1.86407909
  0.90200000   1.86415590
  0.90200000   1.86419723
  0.90200000   1.86421837
  0.90200000   1.86422813
  0.90200000   1.86423157
  0.90200000   1.86423159
  0.90200000   1.86422983
  0.90200000   1.86422721
  0.90200000   1.86422424
  0.90200000   1.86422119
  0.90200000   1.86421822
  0.90200000   1.86421538
  0.90200000   1.86421270
  0.90200000   1.86421020
  0.90200000   1.86420787
  0.90200000   1.86420569
  0.90200000   1.86420365
  0.90200000   1.86420175
  0.90200000   1.86419996
  0.90200000   1.86419829
  0.90200000   1.86419672
  0.90200000   1.86419523
  0.90210000   1.86627924
  0.90210000   1.86634734
  0.90210000   1.86638336
  0.90210000   1.86640128
  0.90210000   1.86640910
  0.90210000   1.86641138
  0.90210000   1.86641070
  0.90210000   1.86640854
  0.90210000   1.86640568
  0.90210000   1.86640258
  0.90210000   1.86639946
  0.90210000   1.86639644
  0.90210000   1.86639359
  0.90210000   1.86639090
  0.90210000   1.86638840
  0.90210000   1.86638607
  0.90210000   1.86638389
  0.90210000   1.86638186
  0.90210000   1.86637996
  0.90210000   1.86637818
  0.90210000   1.86637651
  0.90210000   1.86637494
  0.90210000   1.86637346
  0.90220000   1.86845966
  0.90220000   1.86851986
  0.90220000   1.86855109
  0.90220000   1.86856612
  0.90220000   1.86857221
  0.90220000   1.86857347
  0.90220000   1.86857219
  0.90220000   1.86856967
  0.90220000   1.86856662
  0.90220000   1.86856340
  0.90220000   1.86856022
  0.90220000   1.86855718
  0.90220000   1.86855431
  0.90220000   1.86855162
  0.90220000   1.86854912
  0.90220000   1.86854678
  0.90220000   1.86854461
  0.90220000   1.86854258
  0.90220000   1.86854069
  0.90220000   1.86853891
  0.90220000   1.86853724
  0.90220000   1.86853567
  0.90220000   1.86853420
  0.90230000   1.87062081
  0.90230000   1.87067383
  0.90230000   1.87070075
  0.90230000   1.87071321
  0.90230000   1.87071777
  0.90230000   1.87071812
  0.90230000   1.87071632
  0.90230000   1.87071350
  0.90230000   1.87071027
  0.90230000   1.87070696
  0.90230000   1.87070374
  0.90230000   1.87070067
  0.90230000   1.87069779
  0.90230000   1.87069510
  0.90230000   1.87069259
  0.90230000   1.87069027
  0.90230000   1.87068810
  0.90230000   1.87068607
  0.90230000   1.87068418
  0.90230000   1.87068241
  0.90230000   1.87068074
  0.90230000   1.87067917
  0.90230000   1.87067770
  0.90240000   1.87276311
  0.90240000   1.87280964
  0.90240000   1.87283268
  0.90240000   1.87284284
  0.90240000   1.87284604
  0.90240000   1.87284561
  0.90240000   1.87284335
  0.90240000   1.87284027
  0.90240000   1.87283690
  0.90240000   1.87283351
  0.90240000   1.87283024
  0.90240000   1.87282715
  0.90240000   1.87282426
  0.90240000   1.87282157
  0.90240000   1.87281907
  0.90240000   1.87281675
  0.90240000   1.87281458
  0.90240000   1.87281256
  0.90240000   1.87281067
  0.90240000   1.87280890
  0.90240000   1.87280724
  0.90240000   1.87280568
  0.90240000   1.87280420
  0.90250000   1.87488698
  0.90250000   1.87492763
  0.90250000   1.87494719
  0.90250000   1.87495530
  0.90250000   1.87495730
  0.90250000   1.87495617
  0.90250000   1.87495352
  0.90250000   1.87495022
  0.90250000   1.87494672
  0.90250000   1.87494327
  0.90250000   1.87493997
  0.90250000   1.87493687
  0.90250000   1.87493398
  0.90250000   1.87493129
  0.90250000   1.87492879
  0.90250000   1.87492647
  0.90250000   1.87492431
  0.90250000   1.87492229
  0.90250000   1.87492041
  0.90250000   1.87491864
  0.90250000   1.87491698
  0.90250000   1.87491542
  0.90250000   1.87491395
  0.90260000   1.87699280
  0.90260000   1.87702814
  0.90260000   1.87704458
  0.90260000   1.87705086
  0.90260000   1.87705181
  0.90260000   1.87705007
  0.90260000   1.87704708
  0.90260000   1.87704359
  0.90260000   1.87703999
  0.90260000   1.87703648
  0.90260000   1.87703316
  0.90260000   1.87703005
  0.90260000   1.87702715
  0.90260000   1.87702447
  0.90260000   1.87702198
  0.90260000   1.87701966
  0.90260000   1.87701750
  0.90260000   1.87701549
  0.90260000   1.87701361
  0.90260000   1.87701184
  0.90260000   1.87701019
  0.90260000   1.87700863
  0.90260000   1.87700715
  0.90270000   1.87908094
  0.90270000   1.87911150
  0.90270000   1.87912514
  0.90270000   1.87912980
  0.90270000   1.87912982
  0.90270000   1.87912755
  0.90270000   1.87912426
  0.90270000   1.87912061
  0.90270000   1.87911692
  0.90270000   1.87911338
  0.90270000   1.87911003
  0.90270000   1.87910692
  0.90270000   1.87910402
  0.90270000   1.87910134
  0.90270000   1.87909885
  0.90270000   1.87909654
  0.90270000   1.87909439
  0.90270000   1.87909238
  0.90270000   1.87909050
  0.90270000   1.87908874
  0.90270000   1.87908708
  0.90270000   1.87908553
  0.90270000   1.87908406
  0.90280000   1.88115176
  0.90280000   1.88117800
  0.90280000   1.88118914
  0.90280000   1.88119236
  0.90280000   1.88119157
  0.90280000   1.88118884
  0.90280000   1.88118530
  0.90280000   1.88118151
  0.90280000   1.88117776
  0.90280000   1.88117417
  0.90280000   1.88117082
  0.90280000   1.88116770
  0.90280000   1.88116480
  0.90280000   1.88116212
  0.90280000   1.88115964
  0.90280000   1.88115733
  0.90280000   1.88115519
  0.90280000   1.88115318
  0.90280000   1.88115131
  0.90280000   1.88114955
  0.90280000   1.88114790
  0.90280000   1.88114634
  0.90280000   1.88114487
  0.90290000   1.88320560
  0.90290000   1.88322796
  0.90290000   1.88323686
  0.90290000   1.88323881
  0.90290000   1.88323730
  0.90290000   1.88323418
  0.90290000   1.88323042
  0.90290000   1.88322651
  0.90290000   1.88322270
  0.90290000   1.88321909
  0.90290000   1.88321573
  0.90290000   1.88321260
  0.90290000   1.88320971
  0.90290000   1.88320704
  0.90290000   1.88320456
  0.90290000   1.88320226
  0.90290000   1.88320012
  0.90290000   1.88319812
  0.90290000   1.88319624
  0.90290000   1.88319449
  0.90290000   1.88319284
  0.90290000   1.88319128
  0.90290000   1.88318982
  0.90300000   1.88524279
  0.90300000   1.88526165
  0.90300000   1.88526856
  0.90300000   1.88526939
  0.90300000   1.88526725
  0.90300000   1.88526378
  0.90300000   1.88525983
  0.90300000   1.88525583
  0.90300000   1.88525198
  0.90300000   1.88524835
  0.90300000   1.88524498
  0.90300000   1.88524185
  0.90300000   1.88523897
  0.90300000   1.88523630
  0.90300000   1.88523383
  0.90300000   1.88523153
  0.90300000   1.88522939
  0.90300000   1.88522739
  0.90300000   1.88522552
  0.90300000   1.88522377
  0.90300000   1.88522212
  0.90300000   1.88522057
  0.90300000   1.88521911
  0.90310000   1.88722738
  0.90310000   1.88726362
  0.90310000   1.88727935
  0.90310000   1.88728449
  0.90310000   1.88728432
  0.90310000   1.88728163
  0.90310000   1.88727787
  0.90310000   1.88727376
  0.90310000   1.88726968
  0.90310000   1.88726579
  0.90310000   1.88726215
  0.90310000   1.88725877
  0.90310000   1.88725565
  0.90310000   1.88725277
  0.90310000   1.88725011
  0.90310000   1.88724764
  0.90310000   1.88724535
  0.90310000   1.88724322
  0.90310000   1.88724122
  0.90310000   1.88723936
  0.90310000   1.88723761
  0.90310000   1.88723596
  0.90310000   1.88723441
  0.90310000   1.88723294
  0.90320000   1.88923712
  0.90320000   1.88926840
  0.90320000   1.88928132
  0.90320000   1.88928488
  0.90320000   1.88928384
  0.90320000   1.88928068
  0.90320000   1.88927666
  0.90320000   1.88927242
  0.90320000   1.88926828
  0.90320000   1.88926435
  0.90320000   1.88926070
  0.90320000   1.88925733
  0.90320000   1.88925421
  0.90320000   1.88925134
  0.90320000   1.88924868
  0.90320000   1.88924622
  0.90320000   1.88924393
  0.90320000   1.88924180
  0.90320000   1.88923981
  0.90320000   1.88923795
  0.90320000   1.88923620
  0.90320000   1.88923455
  0.90320000   1.88923300
  0.90320000   1.88923154
  0.90330000   1.89123060
  0.90330000   1.89125741
  0.90330000   1.89126781
  0.90330000   1.89126998
  0.90330000   1.89126817
  0.90330000   1.89126459
  0.90330000   1.89126035
  0.90330000   1.89125601
  0.90330000   1.89125181
  0.90330000   1.89124787
  0.90330000   1.89124421
  0.90330000   1.89124083
  0.90330000   1.89123772
  0.90330000   1.89123485
  0.90330000   1.89123220
  0.90330000   1.89122975
  0.90330000   1.89122746
  0.90330000   1.89122534
  0.90330000   1.89122335
  0.90330000   1.89122149
  0.90330000   1.89121974
  0.90330000   1.89121810
  0.90330000   1.89121655
  0.90330000   1.89121509
  0.90340000   1.89320815
  0.90340000   1.89323092
  0.90340000   1.89323908
  0.90340000   1.89324001
  0.90340000   1.89323753
  0.90340000   1.89323359
  0.90340000   1.89322917
  0.90340000   1.89322473
  0.90340000   1.89322049
  0.90340000   1.89321653
  0.90340000   1.89321287
  0.90340000   1.89320949
  0.90340000   1.89320639
  0.90340000   1.89320353
  0.90340000   1.89320088
  0.90340000   1.89319843
  0.90340000   1.89319615
  0.90340000   1.89319403
  0.90340000   1.89319205
  0.90340000   1.89319019
  0.90340000   1.89318845
  0.90340000   1.89318681
  0.90340000   1.89318526
  0.90340000   1.89318380
  0.90350000   1.89517006
  0.90350000   1.89518919
  0.90350000   1.89519535
  0.90350000   1.89519519
  0.90350000   1.89519212
  0.90350000   1.89518787
  0.90350000   1.89518329
  0.90350000   1.89517878
  0.90350000   1.89517450
  0.90350000   1.89517053
  0.90350000   1.89516687
  0.90350000   1.89516350
  0.90350000   1.89516040
  0.90350000   1.89515755
  0.90350000   1.89515491
  0.90350000   1.89515246
  0.90350000   1.89515019
  0.90350000   1.89514807
  0.90350000   1.89514609
  0.90350000   1.89514424
  0.90350000   1.89514249
  0.90350000   1.89514086
  0.90350000   1.89513931
  0.90350000   1.89513785
  0.90360000   1.89711662
  0.90360000   1.89713249
  0.90360000   1.89713686
  0.90360000   1.89713573
  0.90360000   1.89713215
  0.90360000   1.89712764
  0.90360000   1.89712292
  0.90360000   1.89711835
  0.90360000   1.89711405
  0.90360000   1.89711007
  0.90360000   1.89710641
  0.90360000   1.89710305
  0.90360000   1.89709996
  0.90360000   1.89709711
  0.90360000   1.89709447
  0.90360000   1.89709203
  0.90360000   1.89708976
  0.90360000   1.89708765
  0.90360000   1.89708567
  0.90360000   1.89708382
  0.90360000   1.89708208
  0.90360000   1.89708044
  0.90360000   1.89707890
  0.90360000   1.89707744
  0.90370000   1.89904809
  0.90370000   1.89906104
  0.90370000   1.89906382
  0.90370000   1.89906184
  0.90370000   1.89905782
  0.90370000   1.89905308
  0.90370000   1.89904825
  0.90370000   1.89904363
  0.90370000   1.89903931
  0.90370000   1.89903533
  0.90370000   1.89903167
  0.90370000   1.89902831
  0.90370000   1.89902523
  0.90370000   1.89902239
  0.90370000   1.89901976
  0.90370000   1.89901732
  0.90370000   1.89901506
  0.90370000   1.89901295
  0.90370000   1.89901097
  0.90370000   1.89900912
  0.90370000   1.89900739
  0.90370000   1.89900575
  0.90370000   1.89900421
  0.90370000   1.89900275
  0.90380000   1.90096476
  0.90380000   1.90097508
  0.90380000   1.90097645
  0.90380000   1.90097373
  0.90380000   1.90096932
  0.90380000   1.90096438
  0.90380000   1.90095947
  0.90380000   1.90095480
  0.90380000   1.90095047
  0.90380000   1.90094649
  0.90380000   1.90094284
  0.90380000   1.90093949
  0.90380000   1.90093641
  0.90380000   1.90093357
  0.90380000   1.90093095
  0.90380000   1.90092852
  0.90380000   1.90092626
  0.90380000   1.90092415
  0.90380000   1.90092218
  0.90380000   1.90092033
  0.90380000   1.90091860
  0.90380000   1.90091696
  0.90380000   1.90091542
  0.90380000   1.90091397
  0.90390000   1.90286686
  0.90390000   1.90287483
  0.90390000   1.90287496
  0.90390000   1.90287159
  0.90390000   1.90286684
  0.90390000   1.90286174
  0.90390000   1.90285675
  0.90390000   1.90285205
  0.90390000   1.90284771
  0.90390000   1.90284373
  0.90390000   1.90284009
  0.90390000   1.90283675
  0.90390000   1.90283368
  0.90390000   1.90283085
  0.90390000   1.90282823
  0.90390000   1.90282581
  0.90390000   1.90282355
  0.90390000   1.90282144
  0.90390000   1.90281948
  0.90390000   1.90281763
  0.90390000   1.90281590
  0.90390000   1.90281426
  0.90390000   1.90281272
  0.90390000   1.90281127
  0.90400000   1.90475465
  0.90400000   1.90476052
  0.90400000   1.90475954
  0.90400000   1.90475560
  0.90400000   1.90475057
  0.90400000   1.90474533
  0.90400000   1.90474027
  0.90400000   1.90473556
  0.90400000   1.90473121
  0.90400000   1.90472724
  0.90400000   1.90472360
  0.90400000   1.90472027
  0.90400000   1.90471720
  0.90400000   1.90471438
  0.90400000   1.90471177
  0.90400000   1.90470935
  0.90400000   1.90470710
  0.90400000   1.90470500
  0.90400000   1.90470303
  0.90400000   1.90470119
  0.90400000   1.90469945
  0.90400000   1.90469782
  0.90400000   1.90469628
  0.90400000   1.90469483
  0.90410000   1.90662835
  0.90410000   1.90663235
  0.90410000   1.90663040
  0.90410000   1.90662596
  0.90410000   1.90662068
  0.90410000   1.90661533
  0.90410000   1.90661022
  0.90410000   1.90660549
  0.90410000   1.90660114
  0.90410000   1.90659717
  0.90410000   1.90659354
  0.90410000   1.90659022
  0.90410000   1.90658717
  0.90410000   1.90658435
  0.90410000   1.90658174
  0.90410000   1.90657933
  0.90410000   1.90657708
  0.90410000   1.90657498
  0.90410000   1.90657302
  0.90410000   1.90657118
  0.90410000   1.90656945
  0.90410000   1.90656782
  0.90410000   1.90656628
  0.90410000   1.90656482
  0.90420000   1.90848819
  0.90420000   1.90849053
  0.90420000   1.90848772
  0.90420000   1.90848285
  0.90420000   1.90847736
  0.90420000   1.90847191
  0.90420000   1.90846677
  0.90420000   1.90846202
  0.90420000   1.90845768
  0.90420000   1.90845372
  0.90420000   1.90845009
  0.90420000   1.90844678
  0.90420000   1.90844373
  0.90420000   1.90844092
  0.90420000   1.90843832
  0.90420000   1.90843591
  0.90420000   1.90843367
  0.90420000   1.90843157
  0.90420000   1.90842961
  0.90420000   1.90842777
  0.90420000   1.90842604
  0.90420000   1.90842441
  0.90420000   1.90842287
  0.90420000   1.90842142
  0.90430000   1.91033439
  0.90430000   1.91033525
  0.90430000   1.91033169
  0.90430000   1.91032644
  0.90430000   1.91032078
  0.90430000   1.91031525
  0.90430000   1.91031008
  0.90430000   1.91030532
  0.90430000   1.91030098
  0.90430000   1.91029703
  0.90430000   1.91029342
  0.90430000   1.91029011
  0.90430000   1.91028707
  0.90430000   1.91028427
  0.90430000   1.91028167
  0.90430000   1.91027926
  0.90430000   1.91027702
  0.90430000   1.91027493
  0.90430000   1.91027297
  0.90430000   1.91027113
  0.90430000   1.91026941
  0.90430000   1.91026778
  0.90430000   1.91026624
  0.90430000   1.91026479
  0.90440000   1.91216715
  0.90440000   1.91216670
  0.90440000   1.91216248
  0.90440000   1.91215691
  0.90440000   1.91215110
  0.90440000   1.91214550
  0.90440000   1.91214031
  0.90440000   1.91213555
  0.90440000   1.91213122
  0.90440000   1.91212728
  0.90440000   1.91212367
  0.90440000   1.91212037
  0.90440000   1.91211734
  0.90440000   1.91211454
  0.90440000   1.91211196
  0.90440000   1.91210955
  0.90440000   1.91210731
  0.90440000   1.91210522
  0.90440000   1.91210327
  0.90440000   1.91210143
  0.90440000   1.91209971
  0.90440000   1.91209808
  0.90440000   1.91209654
  0.90440000   1.91209509
  0.90450000   1.91398668
  0.90450000   1.91398507
  0.90450000   1.91398027
  0.90450000   1.91397443
  0.90450000   1.91396849
  0.90450000   1.91396284
  0.90450000   1.91395763
  0.90450000   1.91395288
  0.90450000   1.91394856
  0.90450000   1.91394462
  0.90450000   1.91394102
  0.90450000   1.91393773
  0.90450000   1.91393471
  0.90450000   1.91393192
  0.90450000   1.91392933
  0.90450000   1.91392694
  0.90450000   1.91392470
  0.90450000   1.91392261
  0.90450000   1.91392066
  0.90450000   1.91391882
  0.90450000   1.91391710
  0.90450000   1.91391547
  0.90450000   1.91391394
  0.90450000   1.91391248
  0.90460000   1.91579317
  0.90460000   1.91579053
  0.90460000   1.91578523
  0.90460000   1.91577915
  0.90460000   1.91577311
  0.90460000   1.91576743
  0.90460000   1.91576221
  0.90460000   1.91575746
  0.90460000   1.91575314
  0.90460000   1.91574921
  0.90460000   1.91574563
  0.90460000   1.91574235
  0.90460000   1.91573933
  0.90460000   1.91573655
  0.90460000   1.91573397
  0.90460000   1.91573157
  0.90460000   1.91572934
  0.90460000   1.91572726
  0.90460000   1.91572530
  0.90460000   1.91572347
  0.90460000   1.91572175
  0.90460000   1.91572012
  0.90460000   1.91571859
  0.90460000   1.91571713
  0.90470000   1.91758681
  0.90470000   1.91758327
  0.90470000   1.91757753
  0.90470000   1.91757125
  0.90470000   1.91756512
  0.90470000   1.91755941
  0.90470000   1.91755419
  0.90470000   1.91754944
  0.90470000   1.91754514
  0.90470000   1.91754122
  0.90470000   1.91753765
  0.90470000   1.91753437
  0.90470000   1.91753136
  0.90470000   1.91752858
  0.90470000   1.91752601
  0.90470000   1.91752362
  0.90470000   1.91752139
  0.90470000   1.91751930
  0.90470000   1.91751735
  0.90470000   1.91751552
  0.90470000   1.91751380
  0.90470000   1.91751218
  0.90470000   1.91751064
  0.90470000   1.91750919
  0.90480000   1.91936778
  0.90480000   1.91936344
  0.90480000   1.91935733
  0.90480000   1.91935088
  0.90480000   1.91934468
  0.90480000   1.91933895
  0.90480000   1.91933372
  0.90480000   1.91932899
  0.90480000   1.91932469
  0.90480000   1.91932079
  0.90480000   1.91931722
  0.90480000   1.91931396
  0.90480000   1.91931095
  0.90480000   1.91930818
  0.90480000   1.91930561
  0.90480000   1.91930322
  0.90480000   1.91930100
  0.90480000   1.91929892
  0.90480000   1.91929697
  0.90480000   1.91929514
  0.90480000   1.91929342
  0.90480000   1.91929179
  0.90480000   1.91929026
  0.90480000   1.91928881
  0.90490000   1.92113625
  0.90490000   1.92113123
  0.90490000   1.92112479
  0.90490000   1.92111820
  0.90490000   1.92111194
  0.90490000   1.92110619
  0.90490000   1.92110097
  0.90490000   1.92109625
  0.90490000   1.92109196
  0.90490000   1.92108807
  0.90490000   1.92108451
  0.90490000   1.92108125
  0.90490000   1.92107826
  0.90490000   1.92107549
  0.90490000   1.92107292
  0.90490000   1.92107054
  0.90490000   1.92106832
  0.90490000   1.92106624
  0.90490000   1.92106429
  0.90490000   1.92106246
  0.90490000   1.92106074
  0.90490000   1.92105912
  0.90490000   1.92105758
  0.90490000   1.92105613
  0.90500000   1.92289241
  0.90500000   1.92288677
  0.90500000   1.92288006
  0.90500000   1.92287335
  0.90500000   1.92286705
  0.90500000   1.92286129
  0.90500000   1.92285608
  0.90500000   1.92285136
  0.90500000   1.92284709
  0.90500000   1.92284321
  0.90500000   1.92283966
  0.90500000   1.92283641
  0.90500000   1.92283342
  0.90500000   1.92283065
  0.90500000   1.92282809
  0.90500000   1.92282571
  0.90500000   1.92282349
  0.90500000   1.92282142
  0.90500000   1.92281947
  0.90500000   1.92281764
  0.90500000   1.92281592
  0.90500000   1.92281430
  0.90500000   1.92281277
  0.90500000   1.92281132
  0.90510000   1.92463641
  0.90510000   1.92463024
  0.90510000   1.92462329
  0.90510000   1.92461648
  0.90510000   1.92461015
  0.90510000   1.92460439
  0.90510000   1.92459919
  0.90510000   1.92459448
  0.90510000   1.92459022
  0.90510000   1.92458635
  0.90510000   1.92458281
  0.90510000   1.92457957
  0.90510000   1.92457658
  0.90510000   1.92457383
  0.90510000   1.92457127
  0.90510000   1.92456889
  0.90510000   1.92456667
  0.90510000   1.92456460
  0.90510000   1.92456266
  0.90510000   1.92456083
  0.90510000   1.92455911
  0.90510000   1.92455749
  0.90510000   1.92455596
  0.90510000   1.92455450
  0.90520000   1.92636841
  0.90520000   1.92636179
  0.90520000   1.92635464
  0.90520000   1.92634775
  0.90520000   1.92634140
  0.90520000   1.92633564
  0.90520000   1.92633044
  0.90520000   1.92632575
  0.90520000   1.92632150
  0.90520000   1.92631764
  0.90520000   1.92631411
  0.90520000   1.92631087
  0.90520000   1.92630789
  0.90520000   1.92630514
  0.90520000   1.92630259
  0.90520000   1.92630021
  0.90520000   1.92629800
  0.90520000   1.92629593
  0.90520000   1.92629398
  0.90520000   1.92629216
  0.90520000   1.92629044
  0.90520000   1.92628882
  0.90520000   1.92628729
  0.90520000   1.92628584
  0.90530000   1.92808858
  0.90530000   1.92808156
  0.90530000   1.92807424
  0.90530000   1.92806729
  0.90530000   1.92806092
  0.90530000   1.92805516
  0.90530000   1.92804998
  0.90530000   1.92804530
  0.90530000   1.92804106
  0.90530000   1.92803721
  0.90530000   1.92803369
  0.90530000   1.92803046
  0.90530000   1.92802749
  0.90530000   1.92802474
  0.90530000   1.92802219
  0.90530000   1.92801982
  0.90530000   1.92801761
  0.90530000   1.92801554
  0.90530000   1.92801360
  0.90530000   1.92801178
  0.90530000   1.92801006
  0.90530000   1.92800844
  0.90530000   1.92800690
  0.90530000   1.92800545
  0.90540000   1.92979707
  0.90540000   1.92978970
  0.90540000   1.92978224
  0.90540000   1.92977524
  0.90540000   1.92976886
  0.90540000   1.92976311
  0.90540000   1.92975794
  0.90540000   1.92975328
  0.90540000   1.92974905
  0.90540000   1.92974521
  0.90540000   1.92974170
  0.90540000   1.92973848
  0.90540000   1.92973551
  0.90540000   1.92973277
  0.90540000   1.92973022
  0.90540000   1.92972785
  0.90540000   1.92972564
  0.90540000   1.92972358
  0.90540000   1.92972164
  0.90540000   1.92971981
  0.90540000   1.92971810
  0.90540000   1.92971648
  0.90540000   1.92971494
  0.90540000   1.92971349
  0.90550000   1.93149402
  0.90550000   1.93148636
  0.90550000   1.93147878
  0.90550000   1.93147174
  0.90550000   1.93146536
  0.90550000   1.93145962
  0.90550000   1.93145446
  0.90550000   1.93144981
  0.90550000   1.93144560
  0.90550000   1.93144177
  0.90550000   1.93143827
  0.90550000   1.93143505
  0.90550000   1.93143209
  0.90550000   1.93142935
  0.90550000   1.93142681
  0.90550000   1.93142444
  0.90550000   1.93142224
  0.90550000   1.93142017
  0.90550000   1.93141823
  0.90550000   1.93141641
  0.90550000   1.93141469
  0.90550000   1.93141307
  0.90550000   1.93141154
  0.90550000   1.93141009
  0.90560000   1.93317958
  0.90560000   1.93317167
  0.90560000   1.93316399
  0.90560000   1.93315693
  0.90560000   1.93315055
  0.90560000   1.93314482
  0.90560000   1.93313968
  0.90560000   1.93313504
  0.90560000   1.93313084
  0.90560000   1.93312702
  0.90560000   1.93312353
  0.90560000   1.93312032
  0.90560000   1.93311736
  0.90560000   1.93311463
  0.90560000   1.93311209
  0.90560000   1.93310972
  0.90560000   1.93310752
  0.90560000   1.93310545
  0.90560000   1.93310352
  0.90560000   1.93310169
  0.90560000   1.93309998
  0.90560000   1.93309836
  0.90560000   1.93309683
  0.90560000   1.93309538
  0.90570000   1.93485389
  0.90570000   1.93484576
  0.90570000   1.93483801
  0.90570000   1.93483093
  0.90570000   1.93482456
  0.90570000   1.93481884
  0.90570000   1.93481372
  0.90570000   1.93480909
  0.90570000   1.93480490
  0.90570000   1.93480109
  0.90570000   1.93479761
  0.90570000   1.93479440
  0.90570000   1.93479145
  0.90570000   1.93478872
  0.90570000   1.93478619
  0.90570000   1.93478383
  0.90570000   1.93478162
  0.90570000   1.93477956
  0.90570000   1.93477762
  0.90570000   1.93477580
  0.90570000   1.93477409
  0.90570000   1.93477247
  0.90570000   1.93477094
  0.90570000   1.93476949
  0.90580000   1.93651708
  0.90580000   1.93650879
  0.90580000   1.93650097
  0.90580000   1.93649388
  0.90580000   1.93648751
  0.90580000   1.93648182
  0.90580000   1.93647670
  0.90580000   1.93647209
  0.90580000   1.93646792
  0.90580000   1.93646412
  0.90580000   1.93646064
  0.90580000   1.93645744
  0.90580000   1.93645450
  0.90580000   1.93645177
  0.90580000   1.93644924
  0.90580000   1.93644688
  0.90580000   1.93644468
  0.90580000   1.93644261
  0.90580000   1.93644068
  0.90580000   1.93643886
  0.90580000   1.93643715
  0.90580000   1.93643553
  0.90580000   1.93643399
  0.90580000   1.93643254
  0.90590000   1.93816931
  0.90590000   1.93816086
  0.90590000   1.93815300
  0.90590000   1.93814590
  0.90590000   1.93813955
  0.90590000   1.93813387
  0.90590000   1.93812877
  0.90590000   1.93812418
  0.90590000   1.93812001
  0.90590000   1.93811622
  0.90590000   1.93811275
  0.90590000   1.93810956
  0.90590000   1.93810662
  0.90590000   1.93810389
  0.90590000   1.93810136
  0.90590000   1.93809901
  0.90590000   1.93809681
  0.90590000   1.93809475
  0.90590000   1.93809281
  0.90590000   1.93809099
  0.90590000   1.93808928
  0.90590000   1.93808766
  0.90590000   1.93808613
  0.90590000   1.93808468
  0.90600000   1.93981068
  0.90600000   1.93980212
  0.90600000   1.93979422
  0.90600000   1.93978713
  0.90600000   1.93978079
  0.90600000   1.93977512
  0.90600000   1.93977004
  0.90600000   1.93976546
  0.90600000   1.93976131
  0.90600000   1.93975752
  0.90600000   1.93975406
  0.90600000   1.93975088
  0.90600000   1.93974794
  0.90600000   1.93974522
  0.90600000   1.93974269
  0.90600000   1.93974034
  0.90600000   1.93973814
  0.90600000   1.93973608
  0.90600000   1.93973415
  0.90600000   1.93973233
  0.90600000   1.93973062
  0.90600000   1.93972900
  0.90600000   1.93972747
  0.90600000   1.93972601
  0.90610000   1.94144135
  0.90610000   1.94143268
  0.90610000   1.94142476
  0.90610000   1.94141767
  0.90610000   1.94141135
  0.90610000   1.94140570
  0.90610000   1.94140064
  0.90610000   1.94139607
  0.90610000   1.94139193
  0.90610000   1.94138815
  0.90610000   1.94138470
  0.90610000   1.94138152
  0.90610000   1.94137859
  0.90610000   1.94137587
  0.90610000   1.94137335
  0.90610000   1.94137099
  0.90610000   1.94136880
  0.90610000   1.94136674
  0.90610000   1.94136481
  0.90610000   1.94136299
  0.90610000   1.94136128
  0.90610000   1.94135966
  0.90610000   1.94135813
  0.90610000   1.94135667
  0.90620000   1.94306142
  0.90620000   1.94305267
  0.90620000   1.94304474
  0.90620000   1.94303766
  0.90620000   1.94303136
  0.90620000   1.94302573
  0.90620000   1.94302068
  0.90620000   1.94301612
  0.90620000   1.94301199
  0.90620000   1.94300822
  0.90620000   1.94300478
  0.90620000   1.94300160
  0.90620000   1.94299868
  0.90620000   1.94299596
  0.90620000   1.94299344
  0.90620000   1.94299109
  0.90620000   1.94298890
  0.90620000   1.94298684
  0.90620000   1.94298491
  0.90620000   1.94298309
  0.90620000   1.94298138
  0.90620000   1.94297976
  0.90620000   1.94297823
  0.90620000   1.94297678
  0.90630000   1.94467103
  0.90630000   1.94466222
  0.90630000   1.94465428
  0.90630000   1.94464722
  0.90630000   1.94464093
  0.90630000   1.94463532
  0.90630000   1.94463028
  0.90630000   1.94462574
  0.90630000   1.94462162
  0.90630000   1.94461786
  0.90630000   1.94461442
  0.90630000   1.94461125
  0.90630000   1.94460833
  0.90630000   1.94460562
  0.90630000   1.94460310
  0.90630000   1.94460075
  0.90630000   1.94459856
  0.90630000   1.94459650
  0.90630000   1.94459457
  0.90630000   1.94459276
  0.90630000   1.94459104
  0.90630000   1.94458943
  0.90630000   1.94458789
  0.90630000   1.94458644
  0.90640000   1.94627029
  0.90640000   1.94626144
  0.90640000   1.94625350
  0.90640000   1.94624645
  0.90640000   1.94624018
  0.90640000   1.94623459
  0.90640000   1.94622957
  0.90640000   1.94622504
  0.90640000   1.94622093
  0.90640000   1.94621718
  0.90640000   1.94621374
  0.90640000   1.94621058
  0.90640000   1.94620766
  0.90640000   1.94620496
  0.90640000   1.94620244
  0.90640000   1.94620009
  0.90640000   1.94619790
  0.90640000   1.94619585
  0.90640000   1.94619392
  0.90640000   1.94619210
  0.90640000   1.94619039
  0.90640000   1.94618877
  0.90640000   1.94618724
  0.90640000   1.94618579
  0.90650000   1.94785933
  0.90650000   1.94785044
  0.90650000   1.94784251
  0.90650000   1.94783548
  0.90650000   1.94782923
  0.90650000   1.94782366
  0.90650000   1.94781865
  0.90650000   1.94781413
  0.90650000   1.94781003
  0.90650000   1.94780629
  0.90650000   1.94780286
  0.90650000   1.94779971
  0.90650000   1.94779679
  0.90650000   1.94779409
  0.90650000   1.94779157
  0.90650000   1.94778923
  0.90650000   1.94778704
  0.90650000   1.94778498
  0.90650000   1.94778305
  0.90650000   1.94778124
  0.90650000   1.94777953
  0.90650000   1.94777791
  0.90650000   1.94777638
  0.90650000   1.94777492
  0.90660000   1.94943826
  0.90660000   1.94942935
  0.90660000   1.94942143
  0.90660000   1.94941441
  0.90660000   1.94940819
  0.90660000   1.94940263
  0.90660000   1.94939764
  0.90660000   1.94939314
  0.90660000   1.94938904
  0.90660000   1.94938531
  0.90660000   1.94938189
  0.90660000   1.94937874
  0.90660000   1.94937582
  0.90660000   1.94937312
  0.90660000   1.94937061
  0.90660000   1.94936827
  0.90660000   1.94936608
  0.90660000   1.94936403
  0.90660000   1.94936210
  0.90660000   1.94936028
  0.90660000   1.94935857
  0.90660000   1.94935695
  0.90660000   1.94935542
  0.90660000   1.94935397
  0.90670000   1.95100719
  0.90670000   1.95099827
  0.90670000   1.95099036
  0.90670000   1.95098337
  0.90670000   1.95097716
  0.90670000   1.95097163
  0.90670000   1.95096665
  0.90670000   1.95096216
  0.90670000   1.95095808
  0.90670000   1.95095435
  0.90670000   1.95095093
  0.90670000   1.95094778
  0.90670000   1.95094488
  0.90670000   1.95094218
  0.90670000   1.95093967
  0.90670000   1.95093733
  0.90670000   1.95093514
  0.90670000   1.95093309
  0.90670000   1.95093116
  0.90670000   1.95092935
  0.90670000   1.95092763
  0.90670000   1.95092601
  0.90670000   1.95092448
  0.90670000   1.95092303
  0.90680000   1.95256624
  0.90680000   1.95255731
  0.90680000   1.95254942
  0.90680000   1.95254245
  0.90680000   1.95253627
  0.90680000   1.95253075
  0.90680000   1.95252579
  0.90680000   1.95252131
  0.90680000   1.95251723
  0.90680000   1.95251351
  0.90680000   1.95251010
  0.90680000   1.95250696
  0.90680000   1.95250406
  0.90680000   1.95250136
  0.90680000   1.95249885
  0.90680000   1.95249652
  0.90680000   1.95249433
  0.90680000   1.95249228
  0.90680000   1.95249035
  0.90680000   1.95248853
  0.90680000   1.95248682
  0.90680000   1.95248520
  0.90680000   1.95248367
  0.90680000   1.95248222
  0.90690000   1.95411552
  0.90690000   1.95410659
  0.90690000   1.95409872
  0.90690000   1.95409178
  0.90690000   1.95408561
  0.90690000   1.95408011
  0.90690000   1.95407516
  0.90690000   1.95407069
  0.90690000   1.95406663
  0.90690000   1.95406292
  0.90690000   1.95405951
  0.90690000   1.95405637
  0.90690000   1.95405347
  0.90690000   1.95405078
  0.90690000   1.95404827
  0.90690000   1.95404594
  0.90690000   1.95404375
  0.90690000   1.95404170
  0.90690000   1.95403977
  0.90690000   1.95403796
  0.90690000   1.95403625
  0.90690000   1.95403463
  0.90690000   1.95403309
  0.90690000   1.95403164
  0.90700000   1.95565513
  0.90700000   1.95564621
  0.90700000   1.95563836
  0.90700000   1.95563144
  0.90700000   1.95562530
  0.90700000   1.95561981
  0.90700000   1.95561488
  0.90700000   1.95561042
  0.90700000   1.95560636
  0.90700000   1.95560266
  0.90700000   1.95559926
  0.90700000   1.95559612
  0.90700000   1.95559323
  0.90700000   1.95559054
  0.90700000   1.95558803
  0.90700000   1.95558570
  0.90700000   1.95558351
  0.90700000   1.95558146
  0.90700000   1.95557954
  0.90700000   1.95557772
  0.90700000   1.95557601
  0.90700000   1.95557439
  0.90700000   1.95557286
  0.90700000   1.95557140
  0.90710000   1.95718518
  0.90710000   1.95717628
  0.90710000   1.95716845
  0.90710000   1.95716155
  0.90710000   1.95715543
  0.90710000   1.95714996
  0.90710000   1.95714504
  0.90710000   1.95714059
  0.90710000   1.95713655
  0.90710000   1.95713285
  0.90710000   1.95712945
  0.90710000   1.95712632
  0.90710000   1.95712343
  0.90710000   1.95712074
  0.90710000   1.95711824
  0.90710000   1.95711590
  0.90710000   1.95711372
  0.90710000   1.95711167
  0.90710000   1.95710974
  0.90710000   1.95710793
  0.90710000   1.95710622
  0.90710000   1.95710460
  0.90710000   1.95710307
  0.90710000   1.95710161
  0.90720000   1.95870577
  0.90720000   1.95869689
  0.90720000   1.95868909
  0.90720000   1.95868221
  0.90720000   1.95867611
  0.90720000   1.95867066
  0.90720000   1.95866575
  0.90720000   1.95866132
  0.90720000   1.95865728
  0.90720000   1.95865358
  0.90720000   1.95865019
  0.90720000   1.95864707
  0.90720000   1.95864418
  0.90720000   1.95864149
  0.90720000   1.95863899
  0.90720000   1.95863666
  0.90720000   1.95863447
  0.90720000   1.95863243
  0.90720000   1.95863050
  0.90720000   1.95862869
  0.90720000   1.95862697
  0.90720000   1.95862536
  0.90720000   1.95862382
  0.90720000   1.95862237
  0.90730000   1.96021701
  0.90730000   1.96020815
  0.90730000   1.96020038
  0.90730000   1.96019353
  0.90730000   1.96018745
  0.90730000   1.96018201
  0.90730000   1.96017712
  0.90730000   1.96017269
  0.90730000   1.96016866
  0.90730000   1.96016497
  0.90730000   1.96016158
  0.90730000   1.96015846
  0.90730000   1.96015557
  0.90730000   1.96015289
  0.90730000   1.96015039
  0.90730000   1.96014806
  0.90730000   1.96014588
  0.90730000   1.96014383
  0.90730000   1.96014191
  0.90730000   1.96014009
  0.90730000   1.96013838
  0.90730000   1.96013676
  0.90730000   1.96013523
  0.90730000   1.96013377
  0.90740000   1.96171900
  0.90740000   1.96171016
  0.90740000   1.96170242
  0.90740000   1.96169559
  0.90740000   1.96168953
  0.90740000   1.96168411
  0.90740000   1.96167923
  0.90740000   1.96167481
  0.90740000   1.96167079
  0.90740000   1.96166711
  0.90740000   1.96166372
  0.90740000   1.96166061
  0.90740000   1.96165772
  0.90740000   1.96165504
  0.90740000   1.96165254
  0.90740000   1.96165021
  0.90740000   1.96164803
  0.90740000   1.96164598
  0.90740000   1.96164406
  0.90740000   1.96164224
  0.90740000   1.96164053
  0.90740000   1.96163891
  0.90740000   1.96163738
  0.90740000   1.96163592
  0.90750000   1.96321183
  0.90750000   1.96320302
  0.90750000   1.96319531
  0.90750000   1.96318850
  0.90750000   1.96318246
  0.90750000   1.96317706
  0.90750000   1.96317219
  0.90750000   1.96316778
  0.90750000   1.96316376
  0.90750000   1.96316009
  0.90750000   1.96315671
  0.90750000   1.96315360
  0.90750000   1.96315071
  0.90750000   1.96314804
  0.90750000   1.96314554
  0.90750000   1.96314321
  0.90750000   1.96314103
  0.90750000   1.96313898
  0.90750000   1.96313706
  0.90750000   1.96313524
  0.90750000   1.96313353
  0.90750000   1.96313191
  0.90750000   1.96313038
  0.90750000   1.96312892
  0.90760000   1.96469561
  0.90760000   1.96468683
  0.90760000   1.96467914
  0.90760000   1.96467236
  0.90760000   1.96466634
  0.90760000   1.96466095
  0.90760000   1.96465609
  0.90760000   1.96465169
  0.90760000   1.96464768
  0.90760000   1.96464401
  0.90760000   1.96464064
  0.90760000   1.96463753
  0.90760000   1.96463465
  0.90760000   1.96463197
  0.90760000   1.96462948
  0.90760000   1.96462715
  0.90760000   1.96462497
  0.90760000   1.96462293
  0.90760000   1.96462100
  0.90760000   1.96461919
  0.90760000   1.96461747
  0.90760000   1.96461585
  0.90760000   1.96461432
  0.90760000   1.96461286
  0.90770000   1.96617042
  0.90770000   1.96616167
  0.90770000   1.96615401
  0.90770000   1.96614726
  0.90770000   1.96614125
  0.90770000   1.96613588
  0.90770000   1.96613103
  0.90770000   1.96612664
  0.90770000   1.96612264
  0.90770000   1.96611898
  0.90770000   1.96611561
  0.90770000   1.96611250
  0.90770000   1.96610962
  0.90770000   1.96610695
  0.90770000   1.96610446
  0.90770000   1.96610213
  0.90770000   1.96609995
  0.90770000   1.96609791
  0.90770000   1.96609598
  0.90770000   1.96609417
  0.90770000   1.96609246
  0.90770000   1.96609083
  0.90770000   1.96608930
  0.90770000   1.96608784
  0.90780000   1.96763637
  0.90780000   1.96762765
  0.90780000   1.96762002
  0.90780000   1.96761329
  0.90780000   1.96760731
  0.90780000   1.96760194
  0.90780000   1.96759711
  0.90780000   1.96759273
  0.90780000   1.96758873
  0.90780000   1.96758508
  0.90780000   1.96758171
  0.90780000   1.96757861
  0.90780000   1.96757573
  0.90780000   1.96757306
  0.90780000   1.96757057
  0.90780000   1.96756824
  0.90780000   1.96756606
  0.90780000   1.96756402
  0.90780000   1.96756209
  0.90780000   1.96756028
  0.90780000   1.96755857
  0.90780000   1.96755695
  0.90780000   1.96755541
  0.90780000   1.96755395
  0.90790000   1.96909355
  0.90790000   1.96908486
  0.90790000   1.96907726
  0.90790000   1.96907055
  0.90790000   1.96906458
  0.90790000   1.96905924
  0.90790000   1.96905441
  0.90790000   1.96905004
  0.90790000   1.96904605
  0.90790000   1.96904240
  0.90790000   1.96903904
  0.90790000   1.96903594
  0.90790000   1.96903306
  0.90790000   1.96903039
  0.90790000   1.96902790
  0.90790000   1.96902558
  0.90790000   1.96902340
  0.90790000   1.96902136
  0.90790000   1.96901943
  0.90790000   1.96901762
  0.90790000   1.96901590
  0.90790000   1.96901428
  0.90790000   1.96901275
  0.90790000   1.96901129
  0.90800000   1.97054204
  0.90800000   1.97053339
  0.90800000   1.97052581
  0.90800000   1.97051913
  0.90800000   1.97051318
  0.90800000   1.97050784
  0.90800000   1.97050303
  0.90800000   1.97049867
  0.90800000   1.97049468
  0.90800000   1.97049104
  0.90800000   1.97048768
  0.90800000   1.97048458
  0.90800000   1.97048171
  0.90800000   1.97047904
  0.90800000   1.97047655
  0.90800000   1.97047423
  0.90800000   1.97047205
  0.90800000   1.97047001
  0.90800000   1.97046808
  0.90800000   1.97046627
  0.90800000   1.97046455
  0.90800000   1.97046293
  0.90800000   1.97046140
  0.90800000   1.97045994
  0.90810000   1.97198194
  0.90810000   1.97197332
  0.90810000   1.97196577
  0.90810000   1.97195911
  0.90810000   1.97195318
  0.90810000   1.97194786
  0.90810000   1.97194305
  0.90810000   1.97193870
  0.90810000   1.97193472
  0.90810000   1.97193108
  0.90810000   1.97192773
  0.90810000   1.97192463
  0.90810000   1.97192176
  0.90810000   1.97191909
  0.90810000   1.97191661
  0.90810000   1.97191428
  0.90810000   1.97191211
  0.90810000   1.97191006
  0.90810000   1.97190814
  0.90810000   1.97190632
  0.90810000   1.97190461
  0.90810000   1.97190299
  0.90810000   1.97190145
  0.90810000   1.97189999
  0.90820000   1.97341334
  0.90820000   1.97340475
  0.90820000   1.97339723
  0.90820000   1.97339059
  0.90820000   1.97338467
  0.90820000   1.97337936
  0.90820000   1.97337457
  0.90820000   1.97337022
  0.90820000   1.97336625
  0.90820000   1.97336261
  0.90820000   1.97335927
  0.90820000   1.97335617
  0.90820000   1.97335331
  0.90820000   1.97335064
  0.90820000   1.97334816
  0.90820000   1.97334583
  0.90820000   1.97334366
  0.90820000   1.97334161
  0.90820000   1.97333969
  0.90820000   1.97333787
  0.90820000   1.97333616
  0.90820000   1.97333454
  0.90820000   1.97333300
  0.90820000   1.97333154
  0.90830000   1.97483631
  0.90830000   1.97482776
  0.90830000   1.97482027
  0.90830000   1.97481365
  0.90830000   1.97480775
  0.90830000   1.97480245
  0.90830000   1.97479767
  0.90830000   1.97479333
  0.90830000   1.97478937
  0.90830000   1.97478573
  0.90830000   1.97478239
  0.90830000   1.97477930
  0.90830000   1.97477643
  0.90830000   1.97477377
  0.90830000   1.97477128
  0.90830000   1.97476896
  0.90830000   1.97476678
  0.90830000   1.97476474
  0.90830000   1.97476282
  0.90830000   1.97476100
  0.90830000   1.97475929
  0.90830000   1.97475766
  0.90830000   1.97475613
  0.90830000   1.97475467
  0.90840000   1.97625096
  0.90840000   1.97624244
  0.90840000   1.97623497
  0.90840000   1.97622837
  0.90840000   1.97622249
  0.90840000   1.97621721
  0.90840000   1.97621243
  0.90840000   1.97620810
  0.90840000   1.97620414
  0.90840000   1.97620051
  0.90840000   1.97619717
  0.90840000   1.97619408
  0.90840000   1.97619122
  0.90840000   1.97618856
  0.90840000   1.97618608
  0.90840000   1.97618375
  0.90840000   1.97618158
  0.90840000   1.97617953
  0.90840000   1.97617761
  0.90840000   1.97617580
  0.90840000   1.97617408
  0.90840000   1.97617246
  0.90840000   1.97617092
  0.90840000   1.97616946
  0.90850000   1.97765736
  0.90850000   1.97764887
  0.90850000   1.97764143
  0.90850000   1.97763485
  0.90850000   1.97762898
  0.90850000   1.97762371
  0.90850000   1.97761895
  0.90850000   1.97761462
  0.90850000   1.97761067
  0.90850000   1.97760705
  0.90850000   1.97760371
  0.90850000   1.97760062
  0.90850000   1.97759776
  0.90850000   1.97759510
  0.90850000   1.97759262
  0.90850000   1.97759030
  0.90850000   1.97758812
  0.90850000   1.97758608
  0.90850000   1.97758415
  0.90850000   1.97758234
  0.90850000   1.97758062
  0.90850000   1.97757900
  0.90850000   1.97757746
  0.90850000   1.97757600
  0.90860000   1.97905560
  0.90860000   1.97904714
  0.90860000   1.97903973
  0.90860000   1.97903317
  0.90860000   1.97902731
  0.90860000   1.97902205
  0.90860000   1.97901730
  0.90860000   1.97901298
  0.90860000   1.97900903
  0.90860000   1.97900541
  0.90860000   1.97900208
  0.90860000   1.97899900
  0.90860000   1.97899614
  0.90860000   1.97899348
  0.90860000   1.97899100
  0.90860000   1.97898867
  0.90860000   1.97898650
  0.90860000   1.97898446
  0.90860000   1.97898253
  0.90860000   1.97898072
  0.90860000   1.97897900
  0.90860000   1.97897738
  0.90860000   1.97897584
  0.90860000   1.97897438
  0.90870000   1.98044575
  0.90870000   1.98043733
  0.90870000   1.98042994
  0.90870000   1.98042340
  0.90870000   1.98041756
  0.90870000   1.98041231
  0.90870000   1.98040757
  0.90870000   1.98040325
  0.90870000   1.98039931
  0.90870000   1.98039570
  0.90870000   1.98039236
  0.90870000   1.98038928
  0.90870000   1.98038643
  0.90870000   1.98038377
  0.90870000   1.98038129
  0.90870000   1.98037897
  0.90870000   1.98037679
  0.90870000   1.98037475
  0.90870000   1.98037282
  0.90870000   1.98037101
  0.90870000   1.98036929
  0.90870000   1.98036767
  0.90870000   1.98036613
  0.90870000   1.98036467
  0.90880000   1.98182791
  0.90880000   1.98181952
  0.90880000   1.98181215
  0.90880000   1.98180563
  0.90880000   1.98179980
  0.90880000   1.98179457
  0.90880000   1.98178983
  0.90880000   1.98178552
  0.90880000   1.98178159
  0.90880000   1.98177797
  0.90880000   1.98177465
  0.90880000   1.98177157
  0.90880000   1.98176871
  0.90880000   1.98176605
  0.90880000   1.98176357
  0.90880000   1.98176125
  0.90880000   1.98175908
  0.90880000   1.98175704
  0.90880000   1.98175511
  0.90880000   1.98175330
  0.90880000   1.98175158
  0.90880000   1.98174995
  0.90880000   1.98174841
  0.90880000   1.98174695
  0.90890000   1.98320214
  0.90890000   1.98319378
  0.90890000   1.98318644
  0.90890000   1.98317993
  0.90890000   1.98317412
  0.90890000   1.98316890
  0.90890000   1.98316417
  0.90890000   1.98315987
  0.90890000   1.98315594
  0.90890000   1.98315233
  0.90890000   1.98314900
  0.90890000   1.98314593
  0.90890000   1.98314307
  0.90890000   1.98314042
  0.90890000   1.98313794
  0.90890000   1.98313562
  0.90890000   1.98313344
  0.90890000   1.98313140
  0.90890000   1.98312948
  0.90890000   1.98312766
  0.90890000   1.98312594
  0.90890000   1.98312432
  0.90890000   1.98312278
  0.90890000   1.98312131
  0.90900000   1.98456853
  0.90900000   1.98456020
  0.90900000   1.98455288
  0.90900000   1.98454639
  0.90900000   1.98454060
  0.90900000   1.98453538
  0.90900000   1.98453066
  0.90900000   1.98452637
  0.90900000   1.98452244
  0.90900000   1.98451884
  0.90900000   1.98451551
  0.90900000   1.98451244
  0.90900000   1.98450959
  0.90900000   1.98450693
  0.90900000   1.98450446
  0.90900000   1.98450214
  0.90900000   1.98449996
  0.90900000   1.98449792
  0.90900000   1.98449599
  0.90900000   1.98449418
  0.90900000   1.98449246
  0.90900000   1.98449083
  0.90900000   1.98448929
  0.90900000   1.98448783
  0.90910000   1.98592716
  0.90910000   1.98591886
  0.90910000   1.98591156
  0.90910000   1.98590509
  0.90910000   1.98589931
  0.90910000   1.98589410
  0.90910000   1.98588939
  0.90910000   1.98588510
  0.90910000   1.98588118
  0.90910000   1.98587758
  0.90910000   1.98587426
  0.90910000   1.98587119
  0.90910000   1.98586834
  0.90910000   1.98586568
  0.90910000   1.98586320
  0.90910000   1.98586089
  0.90910000   1.98585871
  0.90910000   1.98585667
  0.90910000   1.98585474
  0.90910000   1.98585293
  0.90910000   1.98585121
  0.90910000   1.98584958
  0.90910000   1.98584804
  0.90910000   1.98584658
  0.90920000   1.98727809
  0.90920000   1.98726982
  0.90920000   1.98726255
  0.90920000   1.98725609
  0.90920000   1.98725032
  0.90920000   1.98724513
  0.90920000   1.98724043
  0.90920000   1.98723614
  0.90920000   1.98723223
  0.90920000   1.98722863
  0.90920000   1.98722531
  0.90920000   1.98722224
  0.90920000   1.98721939
  0.90920000   1.98721674
  0.90920000   1.98721426
  0.90920000   1.98721194
  0.90920000   1.98720977
  0.90920000   1.98720773
  0.90920000   1.98720580
  0.90920000   1.98720398
  0.90920000   1.98720227
  0.90920000   1.98720064
  0.90920000   1.98719910
  0.90920000   1.98719763
  0.90930000   1.98862142
  0.90930000   1.98861317
  0.90930000   1.98860592
  0.90930000   1.98859948
  0.90930000   1.98859373
  0.90930000   1.98858854
  0.90930000   1.98858385
  0.90930000   1.98857957
  0.90930000   1.98857566
  0.90930000   1.98857206
  0.90930000   1.98856875
  0.90930000   1.98856568
  0.90930000   1.98856283
  0.90930000   1.98856018
  0.90930000   1.98855770
  0.90930000   1.98855539
  0.90930000   1.98855321
  0.90930000   1.98855117
  0.90930000   1.98854924
  0.90930000   1.98854742
  0.90930000   1.98854571
  0.90930000   1.98854408
  0.90930000   1.98854253
  0.90930000   1.98854107
  0.90940000   1.98995720
  0.90940000   1.98994898
  0.90940000   1.98994175
  0.90940000   1.98993533
  0.90940000   1.98992959
  0.90940000   1.98992441
  0.90940000   1.98991972
  0.90940000   1.98991545
  0.90940000   1.98991154
  0.90940000   1.98990795
  0.90940000   1.98990464
  0.90940000   1.98990158
  0.90940000   1.98989873
  0.90940000   1.98989608
  0.90940000   1.98989360
  0.90940000   1.98989128
  0.90940000   1.98988911
  0.90940000   1.98988707
  0.90940000   1.98988514
  0.90940000   1.98988332
  0.90940000   1.98988160
  0.90940000   1.98987998
  0.90940000   1.98987843
  0.90940000   1.98987696
  0.90950000   1.99128552
  0.90950000   1.99127733
  0.90950000   1.99127012
  0.90950000   1.99126371
  0.90950000   1.99125798
  0.90950000   1.99125282
  0.90950000   1.99124813
  0.90950000   1.99124387
  0.90950000   1.99123996
  0.90950000   1.99123638
  0.90950000   1.99123307
  0.90950000   1.99123000
  0.90950000   1.99122716
  0.90950000   1.99122451
  0.90950000   1.99122203
  0.90950000   1.99121971
  0.90950000   1.99121754
  0.90950000   1.99121550
  0.90950000   1.99121357
  0.90950000   1.99121175
  0.90950000   1.99121003
  0.90950000   1.99120840
  0.90950000   1.99120686
  0.90950000   1.99120539
  0.90960000   1.99260644
  0.90960000   1.99259828
  0.90960000   1.99259109
  0.90960000   1.99258470
  0.90960000   1.99257898
  0.90960000   1.99257382
  0.90960000   1.99256915
  0.90960000   1.99256489
  0.90960000   1.99256099
  0.90960000   1.99255740
  0.90960000   1.99255409
  0.90960000   1.99255103
  0.90960000   1.99254819
  0.90960000   1.99254554
  0.90960000   1.99254306
  0.90960000   1.99254075
  0.90960000   1.99253857
  0.90960000   1.99253653
  0.90960000   1.99253460
  0.90960000   1.99253278
  0.90960000   1.99253106
  0.90960000   1.99252943
  0.90960000   1.99252789
  0.90960000   1.99252642
  0.90970000   1.99392004
  0.90970000   1.99391191
  0.90970000   1.99390474
  0.90970000   1.99389836
  0.90970000   1.99389265
  0.90970000   1.99388750
  0.90970000   1.99388283
  0.90970000   1.99387858
  0.90970000   1.99387468
  0.90970000   1.99387110
  0.90970000   1.99386780
  0.90970000   1.99386474
  0.90970000   1.99386189
  0.90970000   1.99385924
  0.90970000   1.99385677
  0.90970000   1.99385445
  0.90970000   1.99385228
  0.90970000   1.99385023
  0.90970000   1.99384831
  0.90970000   1.99384649
  0.90970000   1.99384477
  0.90970000   1.99384314
  0.90970000   1.99384159
  0.90970000   1.99384012
  0.90980000   1.99522639
  0.90980000   1.99521828
  0.90980000   1.99521113
  0.90980000   1.99520477
  0.90980000   1.99519907
  0.90980000   1.99519393
  0.90980000   1.99518927
  0.90980000   1.99518502
  0.90980000   1.99518113
  0.90980000   1.99517755
  0.90980000   1.99517424
  0.90980000   1.99517118
  0.90980000   1.99516834
  0.90980000   1.99516569
  0.90980000   1.99516322
  0.90980000   1.99516090
  0.90980000   1.99515873
  0.90980000   1.99515668
  0.90980000   1.99515476
  0.90980000   1.99515294
  0.90980000   1.99515122
  0.90980000   1.99514959
  0.90980000   1.99514804
  0.90980000   1.99514657
  0.90990000   1.99652555
  0.90990000   1.99651747
  0.90990000   1.99651033
  0.90990000   1.99650399
  0.90990000   1.99649830
  0.90990000   1.99649317
  0.90990000   1.99648851
  0.90990000   1.99648427
  0.90990000   1.99648038
  0.90990000   1.99647681
  0.90990000   1.99647350
  0.90990000   1.99647045
  0.90990000   1.99646760
  0.90990000   1.99646496
  0.90990000   1.99646248
  0.90990000   1.99646017
  0.90990000   1.99645799
  0.90990000   1.99645595
  0.90990000   1.99645402
  0.90990000   1.99645220
  0.90990000   1.99645048
  0.90990000   1.99644885
  0.90990000   1.99644730
  0.90990000   1.99644583
  0.91000000   1.99781760
  0.91000000   1.99780954
  0.91000000   1.99780243
  0.91000000   1.99779609
  0.91000000   1.99779042
  0.91000000   1.99778529
  0.91000000   1.99778064
  0.91000000   1.99777640
  0.91000000   1.99777252
  0.91000000   1.99776895
  0.91000000   1.99776565
  0.91000000   1.99776259
  0.91000000   1.99775975
  0.91000000   1.99775710
  0.91000000   1.99775463
  0.91000000   1.99775231
  0.91000000   1.99775014
  0.91000000   1.99774809
  0.91000000   1.99774617
  0.91000000   1.99774435
  0.91000000   1.99774262
  0.91000000   1.99774099
  0.91000000   1.99773944
  0.91000000   1.99773797
  0.91010000   1.99910260
  0.91010000   1.99909456
  0.91010000   1.99908747
  0.91010000   1.99908115
  0.91010000   1.99907548
  0.91010000   1.99907037
  0.91010000   1.99906572
  0.91010000   1.99906149
  0.91010000   1.99905761
  0.91010000   1.99905404
  0.91010000   1.99905074
  0.91010000   1.99904768
  0.91010000   1.99904484
  0.91010000   1.99904220
  0.91010000   1.99903973
  0.91010000   1.99903741
  0.91010000   1.99903523
  0.91010000   1.99903319
  0.91010000   1.99903126
  0.91010000   1.99902944
  0.91010000   1.99902772
  0.91010000   1.99902608
  0.91010000   1.99902454
  0.91010000   1.99902306
  0.91020000   2.00038062
  0.91020000   2.00037260
  0.91020000   2.00036553
  0.91020000   2.00035922
  0.91020000   2.00035356
  0.91020000   2.00034846
  0.91020000   2.00034382
  0.91020000   2.00033959
  0.91020000   2.00033571
  0.91020000   2.00033214
  0.91020000   2.00032885
  0.91020000   2.00032579
  0.91020000   2.00032295
  0.91020000   2.00032031
  0.91020000   2.00031784
  0.91020000   2.00031552
  0.91020000   2.00031335
  0.91020000   2.00031130
  0.91020000   2.00030937
  0.91020000   2.00030755
  0.91020000   2.00030583
  0.91020000   2.00030419
  0.91020000   2.00030264
  0.91020000   2.00030117
  0.91030000   2.00165172
  0.91030000   2.00164373
  0.91030000   2.00163667
  0.91030000   2.00163037
  0.91030000   2.00162473
  0.91030000   2.00161963
  0.91030000   2.00161500
  0.91030000   2.00161077
  0.91030000   2.00160689
  0.91030000   2.00160333
  0.91030000   2.00160004
  0.91030000   2.00159698
  0.91030000   2.00159415
  0.91030000   2.00159150
  0.91030000   2.00158903
  0.91030000   2.00158671
  0.91030000   2.00158454
  0.91030000   2.00158249
  0.91030000   2.00158056
  0.91030000   2.00157874
  0.91030000   2.00157702
  0.91030000   2.00157538
  0.91030000   2.00157383
  0.91030000   2.00157236
  0.91040000   2.00291597
  0.91040000   2.00290800
  0.91040000   2.00290095
  0.91040000   2.00289467
  0.91040000   2.00288904
  0.91040000   2.00288394
  0.91040000   2.00287932
  0.91040000   2.00287510
  0.91040000   2.00287123
  0.91040000   2.00286766
  0.91040000   2.00286437
  0.91040000   2.00286132
  0.91040000   2.00285848
  0.91040000   2.00285584
  0.91040000   2.00285337
  0.91040000   2.00285105
  0.91040000   2.00284888
  0.91040000   2.00284683
  0.91040000   2.00284490
  0.91040000   2.00284308
  0.91040000   2.00284135
  0.91040000   2.00283972
  0.91040000   2.00283817
  0.91040000   2.00283669
  0.91050000   2.00417343
  0.91050000   2.00416548
  0.91050000   2.00415845
  0.91050000   2.00415219
  0.91050000   2.00414656
  0.91050000   2.00414147
  0.91050000   2.00413685
  0.91050000   2.00413263
  0.91050000   2.00412877
  0.91050000   2.00412521
  0.91050000   2.00412192
  0.91050000   2.00411887
  0.91050000   2.00411603
  0.91050000   2.00411339
  0.91050000   2.00411091
  0.91050000   2.00410860
  0.91050000   2.00410642
  0.91050000   2.00410438
  0.91050000   2.00410245
  0.91050000   2.00410062
  0.91050000   2.00409890
  0.91050000   2.00409726
  0.91050000   2.00409571
  0.91050000   2.00409424
  0.91060000   2.00542416
  0.91060000   2.00541624
  0.91060000   2.00540923
  0.91060000   2.00540297
  0.91060000   2.00539735
  0.91060000   2.00539227
  0.91060000   2.00538766
  0.91060000   2.00538345
  0.91060000   2.00537958
  0.91060000   2.00537602
  0.91060000   2.00537273
  0.91060000   2.00536969
  0.91060000   2.00536685
  0.91060000   2.00536421
  0.91060000   2.00536174
  0.91060000   2.00535942
  0.91060000   2.00535724
  0.91060000   2.00535520
  0.91060000   2.00535327
  0.91060000   2.00535144
  0.91060000   2.00534972
  0.91060000   2.00534808
  0.91060000   2.00534653
  0.91060000   2.00534505
  0.91070000   2.00666824
  0.91070000   2.00666033
  0.91070000   2.00665334
  0.91070000   2.00664709
  0.91070000   2.00664148
  0.91070000   2.00663641
  0.91070000   2.00663180
  0.91070000   2.00662759
  0.91070000   2.00662373
  0.91070000   2.00662017
  0.91070000   2.00661689
  0.91070000   2.00661384
  0.91070000   2.00661101
  0.91070000   2.00660836
  0.91070000   2.00660589
  0.91070000   2.00660357
  0.91070000   2.00660140
  0.91070000   2.00659935
  0.91070000   2.00659742
  0.91070000   2.00659560
  0.91070000   2.00659387
  0.91070000   2.00659223
  0.91070000   2.00659068
  0.91070000   2.00658920
  0.91080000   2.00790571
  0.91080000   2.00789783
  0.91080000   2.00789084
  0.91080000   2.00788461
  0.91080000   2.00787901
  0.91080000   2.00787395
  0.91080000   2.00786934
  0.91080000   2.00786513
  0.91080000   2.00786128
  0.91080000   2.00785772
  0.91080000   2.00785444
  0.91080000   2.00785139
  0.91080000   2.00784856
  0.91080000   2.00784591
  0.91080000   2.00784344
  0.91080000   2.00784113
  0.91080000   2.00783895
  0.91080000   2.00783690
  0.91080000   2.00783497
  0.91080000   2.00783315
  0.91080000   2.00783142
  0.91080000   2.00782978
  0.91080000   2.00782823
  0.91080000   2.00782675
  0.91090000   2.00913664
  0.91090000   2.00912878
  0.91090000   2.00912181
  0.91090000   2.00911559
  0.91090000   2.00911000
  0.91090000   2.00910494
  0.91090000   2.00910034
  0.91090000   2.00909613
  0.91090000   2.00909228
  0.91090000   2.00908873
  0.91090000   2.00908544
  0.91090000   2.00908240
  0.91090000   2.00907956
  0.91090000   2.00907692
  0.91090000   2.00907445
  0.91090000   2.00907213
  0.91090000   2.00906996
  0.91090000   2.00906791
  0.91090000   2.00906598
  0.91090000   2.00906415
  0.91090000   2.00906242
  0.91090000   2.00906079
  0.91090000   2.00905923
  0.91090000   2.00905775
  0.91100000   2.01036109
  0.91100000   2.01035324
  0.91100000   2.01034629
  0.91100000   2.01034008
  0.91100000   2.01033450
  0.91100000   2.01032944
  0.91100000   2.01032485
  0.91100000   2.01032065
  0.91100000   2.01031680
  0.91100000   2.01031325
  0.91100000   2.01030997
  0.91100000   2.01030692
  0.91100000   2.01030409
  0.91100000   2.01030145
  0.91100000   2.01029898
  0.91100000   2.01029666
  0.91100000   2.01029448
  0.91100000   2.01029243
  0.91100000   2.01029050
  0.91100000   2.01028867
  0.91100000   2.01028695
  0.91100000   2.01028531
  0.91100000   2.01028375
  0.91100000   2.01028227
  0.91110000   2.01157911
  0.91110000   2.01157129
  0.91110000   2.01156435
  0.91110000   2.01155815
  0.91110000   2.01155257
  0.91110000   2.01154753
  0.91110000   2.01154294
  0.91110000   2.01153874
  0.91110000   2.01153489
  0.91110000   2.01153134
  0.91110000   2.01152806
  0.91110000   2.01152502
  0.91110000   2.01152219
  0.91110000   2.01151955
  0.91110000   2.01151708
  0.91110000   2.01151476
  0.91110000   2.01151258
  0.91110000   2.01151053
  0.91110000   2.01150860
  0.91110000   2.01150677
  0.91110000   2.01150504
  0.91110000   2.01150340
  0.91110000   2.01150185
  0.91110000   2.01150037
  0.91120000   2.01279078
  0.91120000   2.01278297
  0.91120000   2.01277604
  0.91120000   2.01276985
  0.91120000   2.01276429
  0.91120000   2.01275925
  0.91120000   2.01275466
  0.91120000   2.01275047
  0.91120000   2.01274662
  0.91120000   2.01274308
  0.91120000   2.01273980
  0.91120000   2.01273675
  0.91120000   2.01273392
  0.91120000   2.01273128
  0.91120000   2.01272881
  0.91120000   2.01272649
  0.91120000   2.01272431
  0.91120000   2.01272226
  0.91120000   2.01272033
  0.91120000   2.01271850
  0.91120000   2.01271677
  0.91120000   2.01271513
  0.91120000   2.01271358
  0.91120000   2.01271210
  0.91130000   2.01399613
  0.91130000   2.01398834
  0.91130000   2.01398143
  0.91130000   2.01397525
  0.91130000   2.01396969
  0.91130000   2.01396466
  0.91130000   2.01396008
  0.91130000   2.01395589
  0.91130000   2.01395204
  0.91130000   2.01394850
  0.91130000   2.01394522
  0.91130000   2.01394218
  0.91130000   2.01393935
  0.91130000   2.01393670
  0.91130000   2.01393423
  0.91130000   2.01393192
  0.91130000   2.01392974
  0.91130000   2.01392769
  0.91130000   2.01392575
  0.91130000   2.01392393
  0.91130000   2.01392220
  0.91130000   2.01392056
  0.91130000   2.01391900
  0.91130000   2.01391752
  0.91140000   2.01519523
  0.91140000   2.01518746
  0.91140000   2.01518056
  0.91140000   2.01517439
  0.91140000   2.01516884
  0.91140000   2.01516381
  0.91140000   2.01515924
  0.91140000   2.01515505
  0.91140000   2.01515121
  0.91140000   2.01514767
  0.91140000   2.01514439
  0.91140000   2.01514135
  0.91140000   2.01513852
  0.91140000   2.01513588
  0.91140000   2.01513341
  0.91140000   2.01513109
  0.91140000   2.01512891
  0.91140000   2.01512686
  0.91140000   2.01512492
  0.91140000   2.01512310
  0.91140000   2.01512137
  0.91140000   2.01511972
  0.91140000   2.01511817
  0.91140000   2.01511668
  0.91150000   2.01638814
  0.91150000   2.01638039
  0.91150000   2.01637350
  0.91150000   2.01636734
  0.91150000   2.01636180
  0.91150000   2.01635678
  0.91150000   2.01635220
  0.91150000   2.01634802
  0.91150000   2.01634418
  0.91150000   2.01634064
  0.91150000   2.01633736
  0.91150000   2.01633432
  0.91150000   2.01633149
  0.91150000   2.01632885
  0.91150000   2.01632638
  0.91150000   2.01632406
  0.91150000   2.01632189
  0.91150000   2.01631983
  0.91150000   2.01631790
  0.91150000   2.01631607
  0.91150000   2.01631434
  0.91150000   2.01631270
  0.91150000   2.01631114
  0.91150000   2.01630965
  0.91160000   2.01757491
  0.91160000   2.01756717
  0.91160000   2.01756030
  0.91160000   2.01755415
  0.91160000   2.01754861
  0.91160000   2.01754360
  0.91160000   2.01753903
  0.91160000   2.01753485
  0.91160000   2.01753101
  0.91160000   2.01752747
  0.91160000   2.01752420
  0.91160000   2.01752116
  0.91160000   2.01751833
  0.91160000   2.01751569
  0.91160000   2.01751322
  0.91160000   2.01751090
  0.91160000   2.01750872
  0.91160000   2.01750667
  0.91160000   2.01750473
  0.91160000   2.01750290
  0.91160000   2.01750117
  0.91160000   2.01749953
  0.91160000   2.01749797
  0.91160000   2.01749648
  0.91170000   2.01875560
  0.91170000   2.01874787
  0.91170000   2.01874101
  0.91170000   2.01873487
  0.91170000   2.01872934
  0.91170000   2.01872433
  0.91170000   2.01871977
  0.91170000   2.01871559
  0.91170000   2.01871176
  0.91170000   2.01870822
  0.91170000   2.01870494
  0.91170000   2.01870191
  0.91170000   2.01869908
  0.91170000   2.01869644
  0.91170000   2.01869396
  0.91170000   2.01869165
  0.91170000   2.01868947
  0.91170000   2.01868741
  0.91170000   2.01868548
  0.91170000   2.01868365
  0.91170000   2.01868191
  0.91170000   2.01868027
  0.91170000   2.01867871
  0.91170000   2.01867723
  0.91180000   2.01993025
  0.91180000   2.01992254
  0.91180000   2.01991570
  0.91180000   2.01990956
  0.91180000   2.01990404
  0.91180000   2.01989903
  0.91180000   2.01989447
  0.91180000   2.01989030
  0.91180000   2.01988647
  0.91180000   2.01988293
  0.91180000   2.01987966
  0.91180000   2.01987662
  0.91180000   2.01987379
  0.91180000   2.01987115
  0.91180000   2.01986868
  0.91180000   2.01986636
  0.91180000   2.01986418
  0.91180000   2.01986213
  0.91180000   2.01986019
  0.91180000   2.01985836
  0.91180000   2.01985663
  0.91180000   2.01985498
  0.91180000   2.01985342
  0.91180000   2.01985194
  0.91190000   2.02109892
  0.91190000   2.02109123
  0.91190000   2.02108440
  0.91190000   2.02107828
  0.91190000   2.02107276
  0.91190000   2.02106776
  0.91190000   2.02106320
  0.91190000   2.02105903
  0.91190000   2.02105520
  0.91190000   2.02105167
  0.91190000   2.02104839
  0.91190000   2.02104536
  0.91190000   2.02104253
  0.91190000   2.02103989
  0.91190000   2.02103742
  0.91190000   2.02103510
  0.91190000   2.02103292
  0.91190000   2.02103086
  0.91190000   2.02102893
  0.91190000   2.02102709
  0.91190000   2.02102536
  0.91190000   2.02102371
  0.91190000   2.02102215
  0.91190000   2.02102067
  0.91200000   2.02226167
  0.91200000   2.02225400
  0.91200000   2.02224717
  0.91200000   2.02224106
  0.91200000   2.02223555
  0.91200000   2.02223056
  0.91200000   2.02222600
  0.91200000   2.02222184
  0.91200000   2.02221801
  0.91200000   2.02221447
  0.91200000   2.02221120
  0.91200000   2.02220816
  0.91200000   2.02220534
  0.91200000   2.02220270
  0.91200000   2.02220022
  0.91200000   2.02219791
  0.91200000   2.02219572
  0.91200000   2.02219367
  0.91200000   2.02219173
  0.91200000   2.02218990
  0.91200000   2.02218816
  0.91200000   2.02218652
  0.91200000   2.02218496
  0.91200000   2.02218347
  0.91210000   2.02341855
  0.91210000   2.02341089
  0.91210000   2.02340408
  0.91210000   2.02339797
  0.91210000   2.02339247
  0.91210000   2.02338748
  0.91210000   2.02338293
  0.91210000   2.02337876
  0.91210000   2.02337494
  0.91210000   2.02337140
  0.91210000   2.02336813
  0.91210000   2.02336510
  0.91210000   2.02336227
  0.91210000   2.02335963
  0.91210000   2.02335716
  0.91210000   2.02335484
  0.91210000   2.02335266
  0.91210000   2.02335060
  0.91210000   2.02334866
  0.91210000   2.02334683
  0.91210000   2.02334509
  0.91210000   2.02334345
  0.91210000   2.02334188
  0.91210000   2.02334040
  0.91220000   2.02456960
  0.91220000   2.02456196
  0.91220000   2.02455516
  0.91220000   2.02454906
  0.91220000   2.02454356
  0.91220000   2.02453858
  0.91220000   2.02453403
  0.91220000   2.02452987
  0.91220000   2.02452604
  0.91220000   2.02452251
  0.91220000   2.02451924
  0.91220000   2.02451621
  0.91220000   2.02451338
  0.91220000   2.02451074
  0.91220000   2.02450827
  0.91220000   2.02450595
  0.91220000   2.02450377
  0.91220000   2.02450171
  0.91220000   2.02449977
  0.91220000   2.02449794
  0.91220000   2.02449620
  0.91220000   2.02449455
  0.91220000   2.02449299
  0.91220000   2.02449150
  0.91230000   2.02571488
  0.91230000   2.02570725
  0.91230000   2.02570046
  0.91230000   2.02569437
  0.91230000   2.02568888
  0.91230000   2.02568390
  0.91230000   2.02567936
  0.91230000   2.02567520
  0.91230000   2.02567138
  0.91230000   2.02566785
  0.91230000   2.02566458
  0.91230000   2.02566154
  0.91230000   2.02565872
  0.91230000   2.02565608
  0.91230000   2.02565360
  0.91230000   2.02565128
  0.91230000   2.02564910
  0.91230000   2.02564705
  0.91230000   2.02564511
  0.91230000   2.02564327
  0.91230000   2.02564153
  0.91230000   2.02563989
  0.91230000   2.02563832
  0.91230000   2.02563683
  0.91240000   2.02685444
  0.91240000   2.02684683
  0.91240000   2.02684005
  0.91240000   2.02683397
  0.91240000   2.02682848
  0.91240000   2.02682350
  0.91240000   2.02681897
  0.91240000   2.02681481
  0.91240000   2.02681099
  0.91240000   2.02680746
  0.91240000   2.02680419
  0.91240000   2.02680116
  0.91240000   2.02679833
  0.91240000   2.02679569
  0.91240000   2.02679322
  0.91240000   2.02679090
  0.91240000   2.02678871
  0.91240000   2.02678666
  0.91240000   2.02678472
  0.91240000   2.02678288
  0.91240000   2.02678114
  0.91240000   2.02677949
  0.91240000   2.02677793
  0.91240000   2.02677644
  0.91250000   2.02798833
  0.91250000   2.02798073
  0.91250000   2.02797396
  0.91250000   2.02796788
  0.91250000   2.02796240
  0.91250000   2.02795743
  0.91250000   2.02795290
  0.91250000   2.02794874
  0.91250000   2.02794492
  0.91250000   2.02794140
  0.91250000   2.02793813
  0.91250000   2.02793510
  0.91250000   2.02793227
  0.91250000   2.02792963
  0.91250000   2.02792715
  0.91250000   2.02792483
  0.91250000   2.02792265
  0.91250000   2.02792059
  0.91250000   2.02791865
  0.91250000   2.02791682
  0.91250000   2.02791508
  0.91250000   2.02791343
  0.91250000   2.02791186
  0.91250000   2.02791037
  0.91260000   2.02911659
  0.91260000   2.02910900
  0.91260000   2.02910224
  0.91260000   2.02909618
  0.91260000   2.02909070
  0.91260000   2.02908574
  0.91260000   2.02908120
  0.91260000   2.02907705
  0.91260000   2.02907323
  0.91260000   2.02906971
  0.91260000   2.02906644
  0.91260000   2.02906341
  0.91260000   2.02906058
  0.91260000   2.02905794
  0.91260000   2.02905547
  0.91260000   2.02905315
  0.91260000   2.02905096
  0.91260000   2.02904891
  0.91260000   2.02904696
  0.91260000   2.02904513
  0.91260000   2.02904339
  0.91260000   2.02904174
  0.91260000   2.02904017
  0.91260000   2.02903868
  0.91270000   2.03023927
  0.91270000   2.03023170
  0.91270000   2.03022495
  0.91270000   2.03021889
  0.91270000   2.03021343
  0.91270000   2.03020846
  0.91270000   2.03020393
  0.91270000   2.03019978
  0.91270000   2.03019597
  0.91270000   2.03019244
  0.91270000   2.03018918
  0.91270000   2.03018614
  0.91270000   2.03018332
  0.91270000   2.03018068
  0.91270000   2.03017820
  0.91270000   2.03017588
  0.91270000   2.03017370
  0.91270000   2.03017164
  0.91270000   2.03016970
  0.91270000   2.03016786
  0.91270000   2.03016612
  0.91270000   2.03016447
  0.91270000   2.03016290
  0.91270000   2.03016141
  0.91280000   2.03135643
  0.91280000   2.03134887
  0.91280000   2.03134213
  0.91280000   2.03133608
  0.91280000   2.03133062
  0.91280000   2.03132566
  0.91280000   2.03132113
  0.91280000   2.03131699
  0.91280000   2.03131317
  0.91280000   2.03130965
  0.91280000   2.03130638
  0.91280000   2.03130335
  0.91280000   2.03130052
  0.91280000   2.03129788
  0.91280000   2.03129541
  0.91280000   2.03129309
  0.91280000   2.03129090
  0.91280000   2.03128884
  0.91280000   2.03128690
  0.91280000   2.03128506
  0.91280000   2.03128332
  0.91280000   2.03128167
  0.91280000   2.03128010
  0.91280000   2.03127860
  0.91290000   2.03246811
  0.91290000   2.03246056
  0.91290000   2.03245383
  0.91290000   2.03244779
  0.91290000   2.03244233
  0.91290000   2.03243737
  0.91290000   2.03243285
  0.91290000   2.03242871
  0.91290000   2.03242489
  0.91290000   2.03242137
  0.91290000   2.03241811
  0.91290000   2.03241507
  0.91290000   2.03241225
  0.91290000   2.03240961
  0.91290000   2.03240713
  0.91290000   2.03240481
  0.91290000   2.03240262
  0.91290000   2.03240057
  0.91290000   2.03239862
  0.91290000   2.03239678
  0.91290000   2.03239504
  0.91290000   2.03239339
  0.91290000   2.03239182
  0.91290000   2.03239032
  0.91300000   2.03357435
  0.91300000   2.03356681
  0.91300000   2.03356009
  0.91300000   2.03355405
  0.91300000   2.03354860
  0.91300000   2.03354365
  0.91300000   2.03353913
  0.91300000   2.03353499
  0.91300000   2.03353118
  0.91300000   2.03352766
  0.91300000   2.03352439
  0.91300000   2.03352136
  0.91300000   2.03351853
  0.91300000   2.03351589
  0.91300000   2.03351342
  0.91300000   2.03351109
  0.91300000   2.03350891
  0.91300000   2.03350685
  0.91300000   2.03350490
  0.91300000   2.03350307
  0.91300000   2.03350132
  0.91300000   2.03349967
  0.91300000   2.03349810
  0.91300000   2.03349660
  0.91310000   2.03467520
  0.91310000   2.03466767
  0.91310000   2.03466096
  0.91310000   2.03465493
  0.91310000   2.03464949
  0.91310000   2.03464454
  0.91310000   2.03464002
  0.91310000   2.03463588
  0.91310000   2.03463207
  0.91310000   2.03462855
  0.91310000   2.03462529
  0.91310000   2.03462226
  0.91310000   2.03461943
  0.91310000   2.03461679
  0.91310000   2.03461431
  0.91310000   2.03461199
  0.91310000   2.03460980
  0.91310000   2.03460774
  0.91310000   2.03460580
  0.91310000   2.03460396
  0.91310000   2.03460221
  0.91310000   2.03460056
  0.91310000   2.03459899
  0.91310000   2.03459749
  0.91320000   2.03577070
  0.91320000   2.03576319
  0.91320000   2.03575649
  0.91320000   2.03575047
  0.91320000   2.03574503
  0.91320000   2.03574008
  0.91320000   2.03573557
  0.91320000   2.03573143
  0.91320000   2.03572762
  0.91320000   2.03572410
  0.91320000   2.03572084
  0.91320000   2.03571781
  0.91320000   2.03571498
  0.91320000   2.03571234
  0.91320000   2.03570986
  0.91320000   2.03570754
  0.91320000   2.03570535
  0.91320000   2.03570329
  0.91320000   2.03570135
  0.91320000   2.03569951
  0.91320000   2.03569776
  0.91320000   2.03569611
  0.91320000   2.03569453
  0.91320000   2.03569304
  0.91330000   2.03686091
  0.91330000   2.03685341
  0.91330000   2.03684672
  0.91330000   2.03684070
  0.91330000   2.03683526
  0.91330000   2.03683032
  0.91330000   2.03682581
  0.91330000   2.03682168
  0.91330000   2.03681787
  0.91330000   2.03681435
  0.91330000   2.03681109
  0.91330000   2.03680806
  0.91330000   2.03680523
  0.91330000   2.03680259
  0.91330000   2.03680011
  0.91330000   2.03679779
  0.91330000   2.03679560
  0.91330000   2.03679354
  0.91330000   2.03679159
  0.91330000   2.03678975
  0.91330000   2.03678801
  0.91330000   2.03678635
  0.91330000   2.03678478
  0.91330000   2.03678328
  0.91340000   2.03794586
  0.91340000   2.03793837
  0.91340000   2.03793169
  0.91340000   2.03792568
  0.91340000   2.03792025
  0.91340000   2.03791531
  0.91340000   2.03791080
  0.91340000   2.03790667
  0.91340000   2.03790286
  0.91340000   2.03789934
  0.91340000   2.03789608
  0.91340000   2.03789305
  0.91340000   2.03789023
  0.91340000   2.03788758
  0.91340000   2.03788511
  0.91340000   2.03788278
  0.91340000   2.03788060
  0.91340000   2.03787853
  0.91340000   2.03787659
  0.91340000   2.03787474
  0.91340000   2.03787300
  0.91340000   2.03787134
  0.91340000   2.03786976
  0.91340000   2.03786827
  0.91350000   2.03902560
  0.91350000   2.03901812
  0.91350000   2.03901145
  0.91350000   2.03900544
  0.91350000   2.03900002
  0.91350000   2.03899509
  0.91350000   2.03899058
  0.91350000   2.03898645
  0.91350000   2.03898264
  0.91350000   2.03897913
  0.91350000   2.03897587
  0.91350000   2.03897283
  0.91350000   2.03897001
  0.91350000   2.03896736
  0.91350000   2.03896489
  0.91350000   2.03896256
  0.91350000   2.03896037
  0.91350000   2.03895831
  0.91350000   2.03895636
  0.91350000   2.03895452
  0.91350000   2.03895277
  0.91350000   2.03895111
  0.91350000   2.03894954
  0.91350000   2.03894804
  0.91360000   2.04010017
  0.91360000   2.04009270
  0.91360000   2.04008604
  0.91360000   2.04008004
  0.91360000   2.04007462
  0.91360000   2.04006969
  0.91360000   2.04006519
  0.91360000   2.04006106
  0.91360000   2.04005725
  0.91360000   2.04005374
  0.91360000   2.04005048
  0.91360000   2.04004745
  0.91360000   2.04004462
  0.91360000   2.04004198
  0.91360000   2.04003950
  0.91360000   2.04003717
  0.91360000   2.04003498
  0.91360000   2.04003292
  0.91360000   2.04003097
  0.91360000   2.04002913
  0.91360000   2.04002738
  0.91360000   2.04002572
  0.91360000   2.04002414
  0.91360000   2.04002264
  0.91370000   2.04116962
  0.91370000   2.04116216
  0.91370000   2.04115550
  0.91370000   2.04114951
  0.91370000   2.04114409
  0.91370000   2.04113917
  0.91370000   2.04113467
  0.91370000   2.04113054
  0.91370000   2.04112674
  0.91370000   2.04112322
  0.91370000   2.04111996
  0.91370000   2.04111693
  0.91370000   2.04111410
  0.91370000   2.04111146
  0.91370000   2.04110898
  0.91370000   2.04110666
  0.91370000   2.04110447
  0.91370000   2.04110240
  0.91370000   2.04110045
  0.91370000   2.04109861
  0.91370000   2.04109686
  0.91370000   2.04109520
  0.91370000   2.04109362
  0.91370000   2.04109212
  0.91380000   2.04223398
  0.91380000   2.04222653
  0.91380000   2.04221988
  0.91380000   2.04221390
  0.91380000   2.04220848
  0.91380000   2.04220356
  0.91380000   2.04219906
  0.91380000   2.04219494
  0.91380000   2.04219114
  0.91380000   2.04218762
  0.91380000   2.04218436
  0.91380000   2.04218133
  0.91380000   2.04217850
  0.91380000   2.04217586
  0.91380000   2.04217338
  0.91380000   2.04217106
  0.91380000   2.04216887
  0.91380000   2.04216680
  0.91380000   2.04216485
  0.91380000   2.04216301
  0.91380000   2.04216126
  0.91380000   2.04215960
  0.91380000   2.04215802
  0.91380000   2.04215652
  0.91390000   2.04329330
  0.91390000   2.04328586
  0.91390000   2.04327922
  0.91390000   2.04327324
  0.91390000   2.04326783
  0.91390000   2.04326291
  0.91390000   2.04325842
  0.91390000   2.04325429
  0.91390000   2.04325049
  0.91390000   2.04324698
  0.91390000   2.04324372
  0.91390000   2.04324069
  0.91390000   2.04323786
  0.91390000   2.04323522
  0.91390000   2.04323274
  0.91390000   2.04323041
  0.91390000   2.04322822
  0.91390000   2.04322616
  0.91390000   2.04322420
  0.91390000   2.04322236
  0.91390000   2.04322061
  0.91390000   2.04321895
  0.91390000   2.04321737
  0.91390000   2.04321586
  0.91400000   2.04434761
  0.91400000   2.04434019
  0.91400000   2.04433355
  0.91400000   2.04432758
  0.91400000   2.04432218
  0.91400000   2.04431726
  0.91400000   2.04431277
  0.91400000   2.04430864
  0.91400000   2.04430485
  0.91400000   2.04430133
  0.91400000   2.04429807
  0.91400000   2.04429504
  0.91400000   2.04429222
  0.91400000   2.04428957
  0.91400000   2.04428709
  0.91400000   2.04428477
  0.91400000   2.04428258
  0.91400000   2.04428051
  0.91400000   2.04427856
  0.91400000   2.04427671
  0.91400000   2.04427496
  0.91400000   2.04427330
  0.91400000   2.04427172
  0.91400000   2.04427021
  0.91410000   2.04539697
  0.91410000   2.04538956
  0.91410000   2.04538293
  0.91410000   2.04537696
  0.91410000   2.04537156
  0.91410000   2.04536665
  0.91410000   2.04536216
  0.91410000   2.04535804
  0.91410000   2.04535424
  0.91410000   2.04535073
  0.91410000   2.04534747
  0.91410000   2.04534444
  0.91410000   2.04534161
  0.91410000   2.04533897
  0.91410000   2.04533649
  0.91410000   2.04533416
  0.91410000   2.04533197
  0.91410000   2.04532990
  0.91410000   2.04532795
  0.91410000   2.04532610
  0.91410000   2.04532435
  0.91410000   2.04532268
  0.91410000   2.04532110
  0.91410000   2.04531960
  0.91420000   2.04644141
  0.91420000   2.04643400
  0.91420000   2.04642738
  0.91420000   2.04642142
  0.91420000   2.04641603
  0.91420000   2.04641112
  0.91420000   2.04640663
  0.91420000   2.04640251
  0.91420000   2.04639871
  0.91420000   2.04639520
  0.91420000   2.04639194
  0.91420000   2.04638891
  0.91420000   2.04638608
  0.91420000   2.04638344
  0.91420000   2.04638096
  0.91420000   2.04637863
  0.91420000   2.04637644
  0.91420000   2.04637437
  0.91420000   2.04637242
  0.91420000   2.04637057
  0.91420000   2.04636882
  0.91420000   2.04636715
  0.91420000   2.04636557
  0.91420000   2.04636406
  0.91430000   2.04748096
  0.91430000   2.04747357
  0.91430000   2.04746696
  0.91430000   2.04746100
  0.91430000   2.04745561
  0.91430000   2.04745070
  0.91430000   2.04744622
  0.91430000   2.04744210
  0.91430000   2.04743830
  0.91430000   2.04743479
  0.91430000   2.04743153
  0.91430000   2.04742850
  0.91430000   2.04742567
  0.91430000   2.04742303
  0.91430000   2.04742055
  0.91430000   2.04741822
  0.91430000   2.04741603
  0.91430000   2.04741396
  0.91430000   2.04741201
  0.91430000   2.04741016
  0.91430000   2.04740840
  0.91430000   2.04740674
  0.91430000   2.04740516
  0.91430000   2.04740365
  0.91440000   2.04851568
  0.91440000   2.04850830
  0.91440000   2.04850169
  0.91440000   2.04849574
  0.91440000   2.04849035
  0.91440000   2.04848545
  0.91440000   2.04848096
  0.91440000   2.04847685
  0.91440000   2.04847305
  0.91440000   2.04846954
  0.91440000   2.04846628
  0.91440000   2.04846325
  0.91440000   2.04846042
  0.91440000   2.04845778
  0.91440000   2.04845530
  0.91440000   2.04845297
  0.91440000   2.04845078
  0.91440000   2.04844871
  0.91440000   2.04844675
  0.91440000   2.04844490
  0.91440000   2.04844315
  0.91440000   2.04844148
  0.91440000   2.04843990
  0.91440000   2.04843839
  0.91450000   2.04954559
  0.91450000   2.04953822
  0.91450000   2.04953162
  0.91450000   2.04952567
  0.91450000   2.04952029
  0.91450000   2.04951539
  0.91450000   2.04951091
  0.91450000   2.04950679
  0.91450000   2.04950300
  0.91450000   2.04949949
  0.91450000   2.04949623
  0.91450000   2.04949320
  0.91450000   2.04949037
  0.91450000   2.04948773
  0.91450000   2.04948525
  0.91450000   2.04948292
  0.91450000   2.04948072
  0.91450000   2.04947865
  0.91450000   2.04947670
  0.91450000   2.04947484
  0.91450000   2.04947309
  0.91450000   2.04947142
  0.91450000   2.04946984
  0.91450000   2.04946833
  0.91460000   2.05057074
  0.91460000   2.05056338
  0.91460000   2.05055678
  0.91460000   2.05055085
  0.91460000   2.05054547
  0.91460000   2.05054057
  0.91460000   2.05053609
  0.91460000   2.05053197
  0.91460000   2.05052818
  0.91460000   2.05052467
  0.91460000   2.05052141
  0.91460000   2.05051838
  0.91460000   2.05051555
  0.91460000   2.05051291
  0.91460000   2.05051043
  0.91460000   2.05050810
  0.91460000   2.05050590
  0.91460000   2.05050383
  0.91460000   2.05050187
  0.91460000   2.05050002
  0.91460000   2.05049827
  0.91460000   2.05049660
  0.91460000   2.05049501
  0.91460000   2.05049351
  0.91470000   2.05159117
  0.91470000   2.05158381
  0.91470000   2.05157722
  0.91470000   2.05157129
  0.91470000   2.05156591
  0.91470000   2.05156102
  0.91470000   2.05155654
  0.91470000   2.05155243
  0.91470000   2.05154863
  0.91470000   2.05154513
  0.91470000   2.05154187
  0.91470000   2.05153884
  0.91470000   2.05153601
  0.91470000   2.05153336
  0.91470000   2.05153088
  0.91470000   2.05152855
  0.91470000   2.05152635
  0.91470000   2.05152428
  0.91470000   2.05152233
  0.91470000   2.05152047
  0.91470000   2.05151872
  0.91470000   2.05151705
  0.91470000   2.05151546
  0.91470000   2.05151395
  0.91480000   2.05260690
  0.91480000   2.05259955
  0.91480000   2.05259297
  0.91480000   2.05258705
  0.91480000   2.05258167
  0.91480000   2.05257678
  0.91480000   2.05257230
  0.91480000   2.05256819
  0.91480000   2.05256440
  0.91480000   2.05256089
  0.91480000   2.05255764
  0.91480000   2.05255460
  0.91480000   2.05255178
  0.91480000   2.05254913
  0.91480000   2.05254665
  0.91480000   2.05254431
  0.91480000   2.05254212
  0.91480000   2.05254005
  0.91480000   2.05253809
  0.91480000   2.05253623
  0.91480000   2.05253448
  0.91480000   2.05253281
  0.91480000   2.05253122
  0.91480000   2.05252971
  0.91490000   2.05361798
  0.91490000   2.05361065
  0.91490000   2.05360407
  0.91490000   2.05359815
  0.91490000   2.05359278
  0.91490000   2.05358789
  0.91490000   2.05358342
  0.91490000   2.05357931
  0.91490000   2.05357551
  0.91490000   2.05357201
  0.91490000   2.05356875
  0.91490000   2.05356572
  0.91490000   2.05356289
  0.91490000   2.05356024
  0.91490000   2.05355776
  0.91490000   2.05355543
  0.91490000   2.05355323
  0.91490000   2.05355116
  0.91490000   2.05354920
  0.91490000   2.05354734
  0.91490000   2.05354559
  0.91490000   2.05354392
  0.91490000   2.05354233
  0.91490000   2.05354082
  0.91500000   2.05462445
  0.91500000   2.05461712
  0.91500000   2.05461056
  0.91500000   2.05460464
  0.91500000   2.05459927
  0.91500000   2.05459439
  0.91500000   2.05458991
  0.91500000   2.05458580
  0.91500000   2.05458201
  0.91500000   2.05457851
  0.91500000   2.05457525
  0.91500000   2.05457222
  0.91500000   2.05456939
  0.91500000   2.05456674
  0.91500000   2.05456426
  0.91500000   2.05456193
  0.91500000   2.05455973
  0.91500000   2.05455765
  0.91500000   2.05455569
  0.91500000   2.05455384
  0.91500000   2.05455208
  0.91500000   2.05455041
  0.91500000   2.05454882
  0.91500000   2.05454731
  0.91510000   2.05562634
  0.91510000   2.05561902
  0.91510000   2.05561246
  0.91510000   2.05560655
  0.91510000   2.05560119
  0.91510000   2.05559630
  0.91510000   2.05559183
  0.91510000   2.05558772
  0.91510000   2.05558393
  0.91510000   2.05558043
  0.91510000   2.05557717
  0.91510000   2.05557414
  0.91510000   2.05557131
  0.91510000   2.05556866
  0.91510000   2.05556618
  0.91510000   2.05556384
  0.91510000   2.05556165
  0.91510000   2.05555957
  0.91510000   2.05555761
  0.91510000   2.05555575
  0.91510000   2.05555400
  0.91510000   2.05555232
  0.91510000   2.05555073
  0.91510000   2.05554922
  0.91520000   2.05662369
  0.91520000   2.05661638
  0.91520000   2.05660982
  0.91520000   2.05660392
  0.91520000   2.05659856
  0.91520000   2.05659367
  0.91520000   2.05658921
  0.91520000   2.05658510
  0.91520000   2.05658131
  0.91520000   2.05657780
  0.91520000   2.05657455
  0.91520000   2.05657152
  0.91520000   2.05656869
  0.91520000   2.05656604
  0.91520000   2.05656355
  0.91520000   2.05656122
  0.91520000   2.05655902
  0.91520000   2.05655695
  0.91520000   2.05655498
  0.91520000   2.05655313
  0.91520000   2.05655137
  0.91520000   2.05654969
  0.91520000   2.05654810
  0.91520000   2.05654659
  0.91530000   2.05761653
  0.91530000   2.05760923
  0.91530000   2.05760268
  0.91530000   2.05759677
  0.91530000   2.05759142
  0.91530000   2.05758654
  0.91530000   2.05758207
  0.91530000   2.05757797
  0.91530000   2.05757418
  0.91530000   2.05757067
  0.91530000   2.05756742
  0.91530000   2.05756439
  0.91530000   2.05756156
  0.91530000   2.05755891
  0.91530000   2.05755642
  0.91530000   2.05755409
  0.91530000   2.05755189
  0.91530000   2.05754981
  0.91530000   2.05754785
  0.91530000   2.05754599
  0.91530000   2.05754423
  0.91530000   2.05754256
  0.91530000   2.05754097
  0.91530000   2.05753945
  0.91540000   2.05860490
  0.91540000   2.05859760
  0.91540000   2.05859106
  0.91540000   2.05858516
  0.91540000   2.05857981
  0.91540000   2.05857493
  0.91540000   2.05857047
  0.91540000   2.05856636
  0.91540000   2.05856258
  0.91540000   2.05855907
  0.91540000   2.05855581
  0.91540000   2.05855278
  0.91540000   2.05854995
  0.91540000   2.05854730
  0.91540000   2.05854482
  0.91540000   2.05854248
  0.91540000   2.05854028
  0.91540000   2.05853821
  0.91540000   2.05853624
  0.91540000   2.05853438
  0.91540000   2.05853262
  0.91540000   2.05853095
  0.91540000   2.05852936
  0.91540000   2.05852784
  0.91550000   2.05958883
  0.91550000   2.05958154
  0.91550000   2.05957501
  0.91550000   2.05956911
  0.91550000   2.05956376
  0.91550000   2.05955889
  0.91550000   2.05955442
  0.91550000   2.05955032
  0.91550000   2.05954653
  0.91550000   2.05954303
  0.91550000   2.05953977
  0.91550000   2.05953674
  0.91550000   2.05953391
  0.91550000   2.05953126
  0.91550000   2.05952878
  0.91550000   2.05952644
  0.91550000   2.05952424
  0.91550000   2.05952216
  0.91550000   2.05952020
  0.91550000   2.05951834
  0.91550000   2.05951657
  0.91550000   2.05951490
  0.91550000   2.05951331
  0.91550000   2.05951179
  0.91560000   2.06056836
  0.91560000   2.06056108
  0.91560000   2.06055455
  0.91560000   2.06054866
  0.91560000   2.06054331
  0.91560000   2.06053844
  0.91560000   2.06053398
  0.91560000   2.06052987
  0.91560000   2.06052609
  0.91560000   2.06052258
  0.91560000   2.06051933
  0.91560000   2.06051630
  0.91560000   2.06051347
  0.91560000   2.06051082
  0.91560000   2.06050833
  0.91560000   2.06050599
  0.91560000   2.06050379
  0.91560000   2.06050171
  0.91560000   2.06049975
  0.91560000   2.06049789
  0.91560000   2.06049612
  0.91560000   2.06049445
  0.91560000   2.06049286
  0.91560000   2.06049134
  0.91570000   2.06154352
  0.91570000   2.06153625
  0.91570000   2.06152972
  0.91570000   2.06152384
  0.91570000   2.06151849
  0.91570000   2.06151362
  0.91570000   2.06150916
  0.91570000   2.06150506
  0.91570000   2.06150127
  0.91570000   2.06149777
  0.91570000   2.06149451
  0.91570000   2.06149148
  0.91570000   2.06148865
  0.91570000   2.06148600
  0.91570000   2.06148351
  0.91570000   2.06148118
  0.91570000   2.06147897
  0.91570000   2.06147690
  0.91570000   2.06147493
  0.91570000   2.06147307
  0.91570000   2.06147130
  0.91570000   2.06146963
  0.91570000   2.06146803
  0.91570000   2.06146652
  0.91580000   2.06251435
  0.91580000   2.06250708
  0.91580000   2.06250056
  0.91580000   2.06249468
  0.91580000   2.06248934
  0.91580000   2.06248447
  0.91580000   2.06248001
  0.91580000   2.06247591
  0.91580000   2.06247212
  0.91580000   2.06246862
  0.91580000   2.06246536
  0.91580000   2.06246233
  0.91580000   2.06245950
  0.91580000   2.06245685
  0.91580000   2.06245436
  0.91580000   2.06245202
  0.91580000   2.06244982
  0.91580000   2.06244774
  0.91580000   2.06244578
  0.91580000   2.06244391
  0.91580000   2.06244215
  0.91580000   2.06244047
  0.91580000   2.06243888
  0.91580000   2.06243736
  0.91590000   2.06348087
  0.91590000   2.06347361
  0.91590000   2.06346710
  0.91590000   2.06346122
  0.91590000   2.06345588
  0.91590000   2.06345101
  0.91590000   2.06344656
  0.91590000   2.06344246
  0.91590000   2.06343867
  0.91590000   2.06343517
  0.91590000   2.06343191
  0.91590000   2.06342888
  0.91590000   2.06342605
  0.91590000   2.06342340
  0.91590000   2.06342091
  0.91590000   2.06341857
  0.91590000   2.06341637
  0.91590000   2.06341429
  0.91590000   2.06341232
  0.91590000   2.06341046
  0.91590000   2.06340869
  0.91590000   2.06340701
  0.91590000   2.06340542
  0.91590000   2.06340390
  0.91600000   2.06444312
  0.91600000   2.06443587
  0.91600000   2.06442936
  0.91600000   2.06442349
  0.91600000   2.06441815
  0.91600000   2.06441329
  0.91600000   2.06440883
  0.91600000   2.06440473
  0.91600000   2.06440095
  0.91600000   2.06439744
  0.91600000   2.06439419
  0.91600000   2.06439116
  0.91600000   2.06438832
  0.91600000   2.06438567
  0.91600000   2.06438318
  0.91600000   2.06438084
  0.91600000   2.06437864
  0.91600000   2.06437656
  0.91600000   2.06437459
  0.91600000   2.06437273
  0.91600000   2.06437096
  0.91600000   2.06436928
  0.91600000   2.06436769
  0.91600000   2.06436616
  0.91610000   2.06540114
  0.91610000   2.06539389
  0.91610000   2.06538739
  0.91610000   2.06538152
  0.91610000   2.06537619
  0.91610000   2.06537132
  0.91610000   2.06536687
  0.91610000   2.06536277
  0.91610000   2.06535899
  0.91610000   2.06535548
  0.91610000   2.06535223
  0.91610000   2.06534920
  0.91610000   2.06534636
  0.91610000   2.06534371
  0.91610000   2.06534122
  0.91610000   2.06533888
  0.91610000   2.06533668
  0.91610000   2.06533459
  0.91610000   2.06533263
  0.91610000   2.06533076
  0.91610000   2.06532899
  0.91610000   2.06532731
  0.91610000   2.06532572
  0.91610000   2.06532420
  0.91620000   2.06635495
  0.91620000   2.06634771
  0.91620000   2.06634121
  0.91620000   2.06633534
  0.91620000   2.06633002
  0.91620000   2.06632516
  0.91620000   2.06632070
  0.91620000   2.06631660
  0.91620000   2.06631282
  0.91620000   2.06630932
  0.91620000   2.06630606
  0.91620000   2.06630303
  0.91620000   2.06630020
  0.91620000   2.06629754
  0.91620000   2.06629505
  0.91620000   2.06629271
  0.91620000   2.06629051
  0.91620000   2.06628843
  0.91620000   2.06628646
  0.91620000   2.06628459
  0.91620000   2.06628282
  0.91620000   2.06628114
  0.91620000   2.06627954
  0.91620000   2.06627802
  0.91630000   2.06730458
  0.91630000   2.06729735
  0.91630000   2.06729086
  0.91630000   2.06728500
  0.91630000   2.06727967
  0.91630000   2.06727481
  0.91630000   2.06727036
  0.91630000   2.06726626
  0.91630000   2.06726248
  0.91630000   2.06725898
  0.91630000   2.06725572
  0.91630000   2.06725269
  0.91630000   2.06724986
  0.91630000   2.06724720
  0.91630000   2.06724471
  0.91630000   2.06724237
  0.91630000   2.06724017
  0.91630000   2.06723808
  0.91630000   2.06723611
  0.91630000   2.06723425
  0.91630000   2.06723248
  0.91630000   2.06723080
  0.91630000   2.06722920
  0.91630000   2.06722767
  0.91640000   2.06825008
  0.91640000   2.06824286
  0.91640000   2.06823637
  0.91640000   2.06823051
  0.91640000   2.06822519
  0.91640000   2.06822033
  0.91640000   2.06821588
  0.91640000   2.06821178
  0.91640000   2.06820800
  0.91640000   2.06820450
  0.91640000   2.06820124
  0.91640000   2.06819821
  0.91640000   2.06819537
  0.91640000   2.06819272
  0.91640000   2.06819023
  0.91640000   2.06818789
  0.91640000   2.06818568
  0.91640000   2.06818360
  0.91640000   2.06818163
  0.91640000   2.06817976
  0.91640000   2.06817799
  0.91640000   2.06817631
  0.91640000   2.06817471
  0.91640000   2.06817318
  0.91650000   2.06919146
  0.91650000   2.06918425
  0.91650000   2.06917776
  0.91650000   2.06917191
  0.91650000   2.06916659
  0.91650000   2.06916173
  0.91650000   2.06915728
  0.91650000   2.06915319
  0.91650000   2.06914941
  0.91650000   2.06914591
  0.91650000   2.06914265
  0.91650000   2.06913962
  0.91650000   2.06913678
  0.91650000   2.06913413
  0.91650000   2.06913164
  0.91650000   2.06912929
  0.91650000   2.06912709
  0.91650000   2.06912500
  0.91650000   2.06912303
  0.91650000   2.06912116
  0.91650000   2.06911939
  0.91650000   2.06911771
  0.91650000   2.06911611
  0.91650000   2.06911458
  0.91660000   2.07012877
  0.91660000   2.07012156
  0.91660000   2.07011508
  0.91660000   2.07010923
  0.91660000   2.07010391
  0.91660000   2.07009906
  0.91660000   2.07009461
  0.91660000   2.07009052
  0.91660000   2.07008674
  0.91660000   2.07008323
  0.91660000   2.07007998
  0.91660000   2.07007694
  0.91660000   2.07007411
  0.91660000   2.07007145
  0.91660000   2.07006896
  0.91660000   2.07006662
  0.91660000   2.07006441
  0.91660000   2.07006232
  0.91660000   2.07006035
  0.91660000   2.07005848
  0.91660000   2.07005671
  0.91660000   2.07005503
  0.91660000   2.07005343
  0.91660000   2.07005190
  0.91670000   2.07106203
  0.91670000   2.07105482
  0.91670000   2.07104835
  0.91670000   2.07104250
  0.91670000   2.07103718
  0.91670000   2.07103233
  0.91670000   2.07102789
  0.91670000   2.07102379
  0.91670000   2.07102001
  0.91670000   2.07101651
  0.91670000   2.07101325
  0.91670000   2.07101022
  0.91670000   2.07100739
  0.91670000   2.07100473
  0.91670000   2.07100224
  0.91670000   2.07099989
  0.91670000   2.07099768
  0.91670000   2.07099560
  0.91670000   2.07099362
  0.91670000   2.07099176
  0.91670000   2.07098998
  0.91670000   2.07098830
  0.91670000   2.07098670
  0.91670000   2.07098517
  0.91680000   2.07199126
  0.91680000   2.07198406
  0.91680000   2.07197760
  0.91680000   2.07197175
  0.91680000   2.07196644
  0.91680000   2.07196159
  0.91680000   2.07195714
  0.91680000   2.07195305
  0.91680000   2.07194927
  0.91680000   2.07194577
  0.91680000   2.07194251
  0.91680000   2.07193948
  0.91680000   2.07193664
  0.91680000   2.07193399
  0.91680000   2.07193149
  0.91680000   2.07192915
  0.91680000   2.07192694
  0.91680000   2.07192485
  0.91680000   2.07192288
  0.91680000   2.07192101
  0.91680000   2.07191923
  0.91680000   2.07191755
  0.91680000   2.07191595
  0.91680000   2.07191442
  0.91690000   2.07291651
  0.91690000   2.07290932
  0.91690000   2.07290285
  0.91690000   2.07289701
  0.91690000   2.07289170
  0.91690000   2.07288685
  0.91690000   2.07288241
  0.91690000   2.07287832
  0.91690000   2.07287454
  0.91690000   2.07287104
  0.91690000   2.07286778
  0.91690000   2.07286475
  0.91690000   2.07286191
  0.91690000   2.07285925
  0.91690000   2.07285676
  0.91690000   2.07285441
  0.91690000   2.07285220
  0.91690000   2.07285012
  0.91690000   2.07284814
  0.91690000   2.07284627
  0.91690000   2.07284450
  0.91690000   2.07284281
  0.91690000   2.07284121
  0.91690000   2.07283968
  0.91700000   2.07383780
  0.91700000   2.07383061
  0.91700000   2.07382415
  0.91700000   2.07381831
  0.91700000   2.07381301
  0.91700000   2.07380816
  0.91700000   2.07380372
  0.91700000   2.07379963
  0.91700000   2.07379585
  0.91700000   2.07379234
  0.91700000   2.07378909
  0.91700000   2.07378605
  0.91700000   2.07378322
  0.91700000   2.07378056
  0.91700000   2.07377807
  0.91700000   2.07377572
  0.91700000   2.07377351
  0.91700000   2.07377142
  0.91700000   2.07376944
  0.91700000   2.07376757
  0.91700000   2.07376580
  0.91700000   2.07376411
  0.91700000   2.07376251
  0.91700000   2.07376098
  0.91710000   2.07475515
  0.91710000   2.07474797
  0.91710000   2.07474152
  0.91710000   2.07473568
  0.91710000   2.07473038
  0.91710000   2.07472553
  0.91710000   2.07472109
  0.91710000   2.07471700
  0.91710000   2.07471322
  0.91710000   2.07470972
  0.91710000   2.07470646
  0.91710000   2.07470343
  0.91710000   2.07470059
  0.91710000   2.07469794
  0.91710000   2.07469544
  0.91710000   2.07469309
  0.91710000   2.07469088
  0.91710000   2.07468879
  0.91710000   2.07468682
  0.91710000   2.07468494
  0.91710000   2.07468317
  0.91710000   2.07468148
  0.91710000   2.07467987
  0.91710000   2.07467835
  0.91720000   2.07566861
  0.91720000   2.07566143
  0.91720000   2.07565498
  0.91720000   2.07564915
  0.91720000   2.07564385
  0.91720000   2.07563901
  0.91720000   2.07563457
  0.91720000   2.07563048
  0.91720000   2.07562670
  0.91720000   2.07562320
  0.91720000   2.07561994
  0.91720000   2.07561690
  0.91720000   2.07561407
  0.91720000   2.07561141
  0.91720000   2.07560891
  0.91720000   2.07560657
  0.91720000   2.07560435
  0.91720000   2.07560226
  0.91720000   2.07560029
  0.91720000   2.07559841
  0.91720000   2.07559664
  0.91720000   2.07559495
  0.91720000   2.07559334
  0.91720000   2.07559181
  0.91730000   2.07657819
  0.91730000   2.07657102
  0.91730000   2.07656458
  0.91730000   2.07655875
  0.91730000   2.07655345
  0.91730000   2.07654861
  0.91730000   2.07654417
  0.91730000   2.07654008
  0.91730000   2.07653630
  0.91730000   2.07653280
  0.91730000   2.07652954
  0.91730000   2.07652650
  0.91730000   2.07652367
  0.91730000   2.07652101
  0.91730000   2.07651851
  0.91730000   2.07651616
  0.91730000   2.07651395
  0.91730000   2.07651186
  0.91730000   2.07650988
  0.91730000   2.07650801
  0.91730000   2.07650623
  0.91730000   2.07650454
  0.91730000   2.07650293
  0.91730000   2.07650140
  0.91740000   2.07748393
  0.91740000   2.07747676
  0.91740000   2.07747032
  0.91740000   2.07746450
  0.91740000   2.07745920
  0.91740000   2.07745436
  0.91740000   2.07744992
  0.91740000   2.07744583
  0.91740000   2.07744205
  0.91740000   2.07743855
  0.91740000   2.07743529
  0.91740000   2.07743226
  0.91740000   2.07742942
  0.91740000   2.07742676
  0.91740000   2.07742427
  0.91740000   2.07742192
  0.91740000   2.07741970
  0.91740000   2.07741761
  0.91740000   2.07741563
  0.91740000   2.07741376
  0.91740000   2.07741198
  0.91740000   2.07741029
  0.91740000   2.07740868
  0.91740000   2.07740715
  0.91750000   2.07838585
  0.91750000   2.07837869
  0.91750000   2.07837225
  0.91750000   2.07836643
  0.91750000   2.07836113
  0.91750000   2.07835630
  0.91750000   2.07835186
  0.91750000   2.07834777
  0.91750000   2.07834399
  0.91750000   2.07834049
  0.91750000   2.07833723
  0.91750000   2.07833420
  0.91750000   2.07833136
  0.91750000   2.07832870
  0.91750000   2.07832620
  0.91750000   2.07832385
  0.91750000   2.07832164
  0.91750000   2.07831954
  0.91750000   2.07831757
  0.91750000   2.07831569
  0.91750000   2.07831391
  0.91750000   2.07831222
  0.91750000   2.07831061
  0.91750000   2.07830908
  0.91760000   2.07928398
  0.91760000   2.07927682
  0.91760000   2.07927039
  0.91760000   2.07926457
  0.91760000   2.07925928
  0.91760000   2.07925444
  0.91760000   2.07925000
  0.91760000   2.07924592
  0.91760000   2.07924214
  0.91760000   2.07923864
  0.91760000   2.07923538
  0.91760000   2.07923234
  0.91760000   2.07922950
  0.91760000   2.07922684
  0.91760000   2.07922435
  0.91760000   2.07922200
  0.91760000   2.07921978
  0.91760000   2.07921769
  0.91760000   2.07921571
  0.91760000   2.07921383
  0.91760000   2.07921205
  0.91760000   2.07921036
  0.91760000   2.07920875
  0.91760000   2.07920722
  0.91770000   2.08017834
  0.91770000   2.08017120
  0.91770000   2.08016477
  0.91770000   2.08015895
  0.91770000   2.08015366
  0.91770000   2.08014883
  0.91770000   2.08014439
  0.91770000   2.08014030
  0.91770000   2.08013653
  0.91770000   2.08013302
  0.91770000   2.08012977
  0.91770000   2.08012673
  0.91770000   2.08012389
  0.91770000   2.08012123
  0.91770000   2.08011873
  0.91770000   2.08011638
  0.91770000   2.08011416
  0.91770000   2.08011207
  0.91770000   2.08011009
  0.91770000   2.08010821
  0.91770000   2.08010643
  0.91770000   2.08010474
  0.91770000   2.08010313
  0.91770000   2.08010159
  0.91780000   2.08106898
  0.91780000   2.08106184
  0.91780000   2.08105541
  0.91780000   2.08104960
  0.91780000   2.08104431
  0.91780000   2.08103947
  0.91780000   2.08103504
  0.91780000   2.08103095
  0.91780000   2.08102718
  0.91780000   2.08102367
  0.91780000   2.08102042
  0.91780000   2.08101738
  0.91780000   2.08101454
  0.91780000   2.08101188
  0.91780000   2.08100938
  0.91780000   2.08100703
  0.91780000   2.08100481
  0.91780000   2.08100272
  0.91780000   2.08100074
  0.91780000   2.08099886
  0.91780000   2.08099708
  0.91780000   2.08099538
  0.91780000   2.08099377
  0.91780000   2.08099224
  0.91790000   2.08195590
  0.91790000   2.08194877
  0.91790000   2.08194235
  0.91790000   2.08193653
  0.91790000   2.08193125
  0.91790000   2.08192642
  0.91790000   2.08192198
  0.91790000   2.08191790
  0.91790000   2.08191412
  0.91790000   2.08191062
  0.91790000   2.08190736
  0.91790000   2.08190432
  0.91790000   2.08190148
  0.91790000   2.08189882
  0.91790000   2.08189632
  0.91790000   2.08189397
  0.91790000   2.08189175
  0.91790000   2.08188965
  0.91790000   2.08188767
  0.91790000   2.08188579
  0.91790000   2.08188401
  0.91790000   2.08188232
  0.91790000   2.08188071
  0.91790000   2.08187917
  0.91800000   2.08283915
  0.91800000   2.08283202
  0.91800000   2.08282560
  0.91800000   2.08281979
  0.91800000   2.08281451
  0.91800000   2.08280967
  0.91800000   2.08280524
  0.91800000   2.08280116
  0.91800000   2.08279738
  0.91800000   2.08279388
  0.91800000   2.08279062
  0.91800000   2.08278758
  0.91800000   2.08278474
  0.91800000   2.08278208
  0.91800000   2.08277958
  0.91800000   2.08277723
  0.91800000   2.08277501
  0.91800000   2.08277291
  0.91800000   2.08277093
  0.91800000   2.08276905
  0.91800000   2.08276727
  0.91800000   2.08276557
  0.91800000   2.08276396
  0.91800000   2.08276242
  0.91810000   2.08371873
  0.91810000   2.08371161
  0.91810000   2.08370520
  0.91810000   2.08369939
  0.91810000   2.08369411
  0.91810000   2.08368928
  0.91810000   2.08368485
  0.91810000   2.08368076
  0.91810000   2.08367699
  0.91810000   2.08367348
  0.91810000   2.08367023
  0.91810000   2.08366719
  0.91810000   2.08366435
  0.91810000   2.08366168
  0.91810000   2.08365918
  0.91810000   2.08365683
  0.91810000   2.08365461
  0.91810000   2.08365251
  0.91810000   2.08365053
  0.91810000   2.08364865
  0.91810000   2.08364687
  0.91810000   2.08364517
  0.91810000   2.08364356
  0.91810000   2.08364202
  0.91820000   2.08459469
  0.91820000   2.08458757
  0.91820000   2.08458117
  0.91820000   2.08457536
  0.91820000   2.08457008
  0.91820000   2.08456525
  0.91820000   2.08456082
  0.91820000   2.08455674
  0.91820000   2.08455296
  0.91820000   2.08454946
  0.91820000   2.08454620
  0.91820000   2.08454316
  0.91820000   2.08454032
  0.91820000   2.08453766
  0.91820000   2.08453516
  0.91820000   2.08453280
  0.91820000   2.08453058
  0.91820000   2.08452848
  0.91820000   2.08452650
  0.91820000   2.08452462
  0.91820000   2.08452283
  0.91820000   2.08452114
  0.91820000   2.08451952
  0.91820000   2.08451799
  0.91830000   2.08546705
  0.91830000   2.08545994
  0.91830000   2.08545353
  0.91830000   2.08544773
  0.91830000   2.08544245
  0.91830000   2.08543762
  0.91830000   2.08543319
  0.91830000   2.08542911
  0.91830000   2.08542533
  0.91830000   2.08542183
  0.91830000   2.08541857
  0.91830000   2.08541553
  0.91830000   2.08541269
  0.91830000   2.08541003
  0.91830000   2.08540753
  0.91830000   2.08540517
  0.91830000   2.08540295
  0.91830000   2.08540085
  0.91830000   2.08539887
  0.91830000   2.08539699
  0.91830000   2.08539520
  0.91830000   2.08539350
  0.91830000   2.08539189
  0.91830000   2.08539035
  0.91840000   2.08633583
  0.91840000   2.08632872
  0.91840000   2.08632232
  0.91840000   2.08631652
  0.91840000   2.08631124
  0.91840000   2.08630642
  0.91840000   2.08630199
  0.91840000   2.08629791
  0.91840000   2.08629413
  0.91840000   2.08629063
  0.91840000   2.08628737
  0.91840000   2.08628433
  0.91840000   2.08628149
  0.91840000   2.08627882
  0.91840000   2.08627632
  0.91840000   2.08627396
  0.91840000   2.08627174
  0.91840000   2.08626964
  0.91840000   2.08626766
  0.91840000   2.08626578
  0.91840000   2.08626399
  0.91840000   2.08626229
  0.91840000   2.08626067
  0.91840000   2.08625913
  0.91850000   2.08720106
  0.91850000   2.08719395
  0.91850000   2.08718755
  0.91850000   2.08718176
  0.91850000   2.08717648
  0.91850000   2.08717166
  0.91850000   2.08716723
  0.91850000   2.08716315
  0.91850000   2.08715937
  0.91850000   2.08715587
  0.91850000   2.08715261
  0.91850000   2.08714957
  0.91850000   2.08714673
  0.91850000   2.08714406
  0.91850000   2.08714156
  0.91850000   2.08713920
  0.91850000   2.08713698
  0.91850000   2.08713488
  0.91850000   2.08713289
  0.91850000   2.08713101
  0.91850000   2.08712922
  0.91850000   2.08712753
  0.91850000   2.08712591
  0.91850000   2.08712437
  0.91860000   2.08806275
  0.91860000   2.08805566
  0.91860000   2.08804926
  0.91860000   2.08804347
  0.91860000   2.08803819
  0.91860000   2.08803337
  0.91860000   2.08802894
  0.91860000   2.08802486
  0.91860000   2.08802109
  0.91860000   2.08801758
  0.91860000   2.08801432
  0.91860000   2.08801128
  0.91860000   2.08800844
  0.91860000   2.08800578
  0.91860000   2.08800327
  0.91860000   2.08800091
  0.91860000   2.08799869
  0.91860000   2.08799659
  0.91860000   2.08799460
  0.91860000   2.08799272
  0.91860000   2.08799093
  0.91860000   2.08798923
  0.91860000   2.08798761
  0.91860000   2.08798607
  0.91870000   2.08892095
  0.91870000   2.08891386
  0.91870000   2.08890747
  0.91870000   2.08890168
  0.91870000   2.08889640
  0.91870000   2.08889158
  0.91870000   2.08888715
  0.91870000   2.08888307
  0.91870000   2.08887930
  0.91870000   2.08887579
  0.91870000   2.08887254
  0.91870000   2.08886949
  0.91870000   2.08886665
  0.91870000   2.08886398
  0.91870000   2.08886148
  0.91870000   2.08885912
  0.91870000   2.08885690
  0.91870000   2.08885480
  0.91870000   2.08885281
  0.91870000   2.08885093
  0.91870000   2.08884914
  0.91870000   2.08884744
  0.91870000   2.08884582
  0.91870000   2.08884428
  0.91880000   2.08977567
  0.91880000   2.08976858
  0.91880000   2.08976219
  0.91880000   2.08975640
  0.91880000   2.08975113
  0.91880000   2.08974631
  0.91880000   2.08974189
  0.91880000   2.08973781
  0.91880000   2.08973403
  0.91880000   2.08973053
  0.91880000   2.08972727
  0.91880000   2.08972423
  0.91880000   2.08972138
  0.91880000   2.08971872
  0.91880000   2.08971621
  0.91880000   2.08971385
  0.91880000   2.08971163
  0.91880000   2.08970953
  0.91880000   2.08970754
  0.91880000   2.08970565
  0.91880000   2.08970386
  0.91880000   2.08970216
  0.91880000   2.08970054
  0.91880000   2.08969900
  0.91890000   2.09062693
  0.91890000   2.09061985
  0.91890000   2.09061346
  0.91890000   2.09060768
  0.91890000   2.09060241
  0.91890000   2.09059759
  0.91890000   2.09059316
  0.91890000   2.09058908
  0.91890000   2.09058531
  0.91890000   2.09058181
  0.91890000   2.09057855
  0.91890000   2.09057551
  0.91890000   2.09057266
  0.91890000   2.09056999
  0.91890000   2.09056749
  0.91890000   2.09056513
  0.91890000   2.09056290
  0.91890000   2.09056080
  0.91890000   2.09055881
  0.91890000   2.09055693
  0.91890000   2.09055514
  0.91890000   2.09055343
  0.91890000   2.09055181
  0.91890000   2.09055027
  0.91900000   2.09147477
  0.91900000   2.09146769
  0.91900000   2.09146131
  0.91900000   2.09145552
  0.91900000   2.09145026
  0.91900000   2.09144544
  0.91900000   2.09144101
  0.91900000   2.09143693
  0.91900000   2.09143316
  0.91900000   2.09142966
  0.91900000   2.09142640
  0.91900000   2.09142335
  0.91900000   2.09142051
  0.91900000   2.09141784
  0.91900000   2.09141533
  0.91900000   2.09141297
  0.91900000   2.09141075
  0.91900000   2.09140865
  0.91900000   2.09140666
  0.91900000   2.09140477
  0.91900000   2.09140298
  0.91900000   2.09140127
  0.91900000   2.09139965
  0.91900000   2.09139811
  0.91910000   2.09231920
  0.91910000   2.09231212
  0.91910000   2.09230574
  0.91910000   2.09229996
  0.91910000   2.09229470
  0.91910000   2.09228988
  0.91910000   2.09228546
  0.91910000   2.09228138
  0.91910000   2.09227760
  0.91910000   2.09227410
  0.91910000   2.09227084
  0.91910000   2.09226780
  0.91910000   2.09226495
  0.91910000   2.09226228
  0.91910000   2.09225977
  0.91910000   2.09225741
  0.91910000   2.09225519
  0.91910000   2.09225308
  0.91910000   2.09225109
  0.91910000   2.09224921
  0.91910000   2.09224741
  0.91910000   2.09224571
  0.91910000   2.09224409
  0.91910000   2.09224254
  0.91920000   2.09316024
  0.91920000   2.09315317
  0.91920000   2.09314680
  0.91920000   2.09314102
  0.91920000   2.09313575
  0.91920000   2.09313094
  0.91920000   2.09312651
  0.91920000   2.09312244
  0.91920000   2.09311866
  0.91920000   2.09311516
  0.91920000   2.09311190
  0.91920000   2.09310885
  0.91920000   2.09310601
  0.91920000   2.09310334
  0.91920000   2.09310083
  0.91920000   2.09309847
  0.91920000   2.09309624
  0.91920000   2.09309414
  0.91920000   2.09309215
  0.91920000   2.09309026
  0.91920000   2.09308847
  0.91920000   2.09308676
  0.91920000   2.09308514
  0.91920000   2.09308359
  0.91930000   2.09399793
  0.91930000   2.09399086
  0.91930000   2.09398449
  0.91930000   2.09397871
  0.91930000   2.09397345
  0.91930000   2.09396864
  0.91930000   2.09396422
  0.91930000   2.09396014
  0.91930000   2.09395636
  0.91930000   2.09395286
  0.91930000   2.09394960
  0.91930000   2.09394655
  0.91930000   2.09394371
  0.91930000   2.09394104
  0.91930000   2.09393853
  0.91930000   2.09393617
  0.91930000   2.09393394
  0.91930000   2.09393184
  0.91930000   2.09392984
  0.91930000   2.09392795
  0.91930000   2.09392616
  0.91930000   2.09392446
  0.91930000   2.09392283
  0.91930000   2.09392129
  0.91940000   2.09483228
  0.91940000   2.09482522
  0.91940000   2.09481885
  0.91940000   2.09481308
  0.91940000   2.09480782
  0.91940000   2.09480300
  0.91940000   2.09479858
  0.91940000   2.09479450
  0.91940000   2.09479073
  0.91940000   2.09478722
  0.91940000   2.09478396
  0.91940000   2.09478092
  0.91940000   2.09477807
  0.91940000   2.09477540
  0.91940000   2.09477289
  0.91940000   2.09477053
  0.91940000   2.09476830
  0.91940000   2.09476619
  0.91940000   2.09476420
  0.91940000   2.09476231
  0.91940000   2.09476052
  0.91940000   2.09475881
  0.91940000   2.09475719
  0.91940000   2.09475564
  0.91950000   2.09566332
  0.91950000   2.09565626
  0.91950000   2.09564989
  0.91950000   2.09564412
  0.91950000   2.09563886
  0.91950000   2.09563405
  0.91950000   2.09562963
  0.91950000   2.09562555
  0.91950000   2.09562178
  0.91950000   2.09561827
  0.91950000   2.09561501
  0.91950000   2.09561197
  0.91950000   2.09560912
  0.91950000   2.09560645
  0.91950000   2.09560394
  0.91950000   2.09560158
  0.91950000   2.09559935
  0.91950000   2.09559724
  0.91950000   2.09559525
  0.91950000   2.09559336
  0.91950000   2.09559156
  0.91950000   2.09558986
  0.91950000   2.09558823
  0.91950000   2.09558668
  0.91960000   2.09649106
  0.91960000   2.09648401
  0.91960000   2.09647765
  0.91960000   2.09647188
  0.91960000   2.09646662
  0.91960000   2.09646181
  0.91960000   2.09645739
  0.91960000   2.09645331
  0.91960000   2.09644954
  0.91960000   2.09644603
  0.91960000   2.09644277
  0.91960000   2.09643973
  0.91960000   2.09643688
  0.91960000   2.09643421
  0.91960000   2.09643170
  0.91960000   2.09642933
  0.91960000   2.09642710
  0.91960000   2.09642500
  0.91960000   2.09642300
  0.91960000   2.09642111
  0.91960000   2.09641932
  0.91960000   2.09641761
  0.91960000   2.09641598
  0.91960000   2.09641443
  0.91970000   2.09731554
  0.91970000   2.09730849
  0.91970000   2.09730213
  0.91970000   2.09729637
  0.91970000   2.09729111
  0.91970000   2.09728630
  0.91970000   2.09728188
  0.91970000   2.09727780
  0.91970000   2.09727403
  0.91970000   2.09727053
  0.91970000   2.09726726
  0.91970000   2.09726422
  0.91970000   2.09726137
  0.91970000   2.09725870
  0.91970000   2.09725619
  0.91970000   2.09725382
  0.91970000   2.09725159
  0.91970000   2.09724948
  0.91970000   2.09724749
  0.91970000   2.09724560
  0.91970000   2.09724380
  0.91970000   2.09724209
  0.91970000   2.09724047
  0.91970000   2.09723892
  0.91980000   2.09813678
  0.91980000   2.09812973
  0.91980000   2.09812337
  0.91980000   2.09811761
  0.91980000   2.09811236
  0.91980000   2.09810755
  0.91980000   2.09810313
  0.91980000   2.09809905
  0.91980000   2.09809528
  0.91980000   2.09809177
  0.91980000   2.09808851
  0.91980000   2.09808546
  0.91980000   2.09808262
  0.91980000   2.09807994
  0.91980000   2.09807743
  0.91980000   2.09807507
  0.91980000   2.09807284
  0.91980000   2.09807073
  0.91980000   2.09806873
  0.91980000   2.09806684
  0.91980000   2.09806504
  0.91980000   2.09806333
  0.91980000   2.09806171
  0.91980000   2.09806015
  0.91990000   2.09895479
  0.91990000   2.09894774
  0.91990000   2.09894139
  0.91990000   2.09893563
  0.91990000   2.09893038
  0.91990000   2.09892557
  0.91990000   2.09892115
  0.91990000   2.09891707
  0.91990000   2.09891330
  0.91990000   2.09890979
  0.91990000   2.09890653
  0.91990000   2.09890349
  0.91990000   2.09890064
  0.91990000   2.09889796
  0.91990000   2.09889545
  0.91990000   2.09889309
  0.91990000   2.09889085
  0.91990000   2.09888874
  0.91990000   2.09888675
  0.91990000   2.09888485
  0.91990000   2.09888306
  0.91990000   2.09888135
  0.91990000   2.09887972
  0.91990000   2.09887817
  0.92000000   2.09976959
  0.92000000   2.09976256
  0.92000000   2.09975621
  0.92000000   2.09975045
  0.92000000   2.09974520
  0.92000000   2.09974039
  0.92000000   2.09973597
  0.92000000   2.09973189
  0.92000000   2.09972812
  0.92000000   2.09972461
  0.92000000   2.09972135
  0.92000000   2.09971831
  0.92000000   2.09971545
  0.92000000   2.09971278
  0.92000000   2.09971027
  0.92000000   2.09970790
  0.92000000   2.09970567
  0.92000000   2.09970356
  0.92000000   2.09970156
  0.92000000   2.09969967
  0.92000000   2.09969787
  0.92000000   2.09969616
  0.92000000   2.09969453
  0.92000000   2.09969298
  0.92010000   2.10058122
  0.92010000   2.10057419
  0.92010000   2.10056784
  0.92010000   2.10056208
  0.92010000   2.10055683
  0.92010000   2.10055203
  0.92010000   2.10054761
  0.92010000   2.10054353
  0.92010000   2.10053976
  0.92010000   2.10053625
  0.92010000   2.10053299
  0.92010000   2.10052994
  0.92010000   2.10052709
  0.92010000   2.10052442
  0.92010000   2.10052191
  0.92010000   2.10051954
  0.92010000   2.10051731
  0.92010000   2.10051519
  0.92010000   2.10051320
  0.92010000   2.10051130
  0.92010000   2.10050950
  0.92010000   2.10050779
  0.92010000   2.10050616
  0.92010000   2.10050461
  0.92020000   2.10138969
  0.92020000   2.10138266
  0.92020000   2.10137632
  0.92020000   2.10137056
  0.92020000   2.10136531
  0.92020000   2.10136051
  0.92020000   2.10135609
  0.92020000   2.10135201
  0.92020000   2.10134824
  0.92020000   2.10134473
  0.92020000   2.10134147
  0.92020000   2.10133842
  0.92020000   2.10133557
  0.92020000   2.10133290
  0.92020000   2.10133038
  0.92020000   2.10132802
  0.92020000   2.10132578
  0.92020000   2.10132367
  0.92020000   2.10132167
  0.92020000   2.10131978
  0.92020000   2.10131798
  0.92020000   2.10131626
  0.92020000   2.10131463
  0.92020000   2.10131308
  0.92030000   2.10219502
  0.92030000   2.10218799
  0.92030000   2.10218165
  0.92030000   2.10217590
  0.92030000   2.10217065
  0.92030000   2.10216585
  0.92030000   2.10216143
  0.92030000   2.10215735
  0.92030000   2.10215358
  0.92030000   2.10215007
  0.92030000   2.10214681
  0.92030000   2.10214376
  0.92030000   2.10214091
  0.92030000   2.10213824
  0.92030000   2.10213572
  0.92030000   2.10213335
  0.92030000   2.10213112
  0.92030000   2.10212901
  0.92030000   2.10212701
  0.92030000   2.10212511
  0.92030000   2.10212331
  0.92030000   2.10212160
  0.92030000   2.10211997
  0.92030000   2.10211841
  0.92040000   2.10299723
  0.92040000   2.10299021
  0.92040000   2.10298387
  0.92040000   2.10297812
  0.92040000   2.10297288
  0.92040000   2.10296807
  0.92040000   2.10296365
  0.92040000   2.10295958
  0.92040000   2.10295580
  0.92040000   2.10295230
  0.92040000   2.10294904
  0.92040000   2.10294599
  0.92040000   2.10294314
  0.92040000   2.10294046
  0.92040000   2.10293795
  0.92040000   2.10293558
  0.92040000   2.10293334
  0.92040000   2.10293123
  0.92040000   2.10292923
  0.92040000   2.10292733
  0.92040000   2.10292553
  0.92040000   2.10292382
  0.92040000   2.10292219
  0.92040000   2.10292063
  0.92050000   2.10379635
  0.92050000   2.10378933
  0.92050000   2.10378300
  0.92050000   2.10377725
  0.92050000   2.10377200
  0.92050000   2.10376720
  0.92050000   2.10376278
  0.92050000   2.10375871
  0.92050000   2.10375493
  0.92050000   2.10375143
  0.92050000   2.10374816
  0.92050000   2.10374512
  0.92050000   2.10374226
  0.92050000   2.10373959
  0.92050000   2.10373707
  0.92050000   2.10373470
  0.92050000   2.10373247
  0.92050000   2.10373035
  0.92050000   2.10372835
  0.92050000   2.10372645
  0.92050000   2.10372465
  0.92050000   2.10372294
  0.92050000   2.10372131
  0.92050000   2.10371975
  0.92060000   2.10459239
  0.92060000   2.10458538
  0.92060000   2.10457904
  0.92060000   2.10457330
  0.92060000   2.10456805
  0.92060000   2.10456325
  0.92060000   2.10455884
  0.92060000   2.10455476
  0.92060000   2.10455099
  0.92060000   2.10454748
  0.92060000   2.10454422
  0.92060000   2.10454117
  0.92060000   2.10453832
  0.92060000   2.10453564
  0.92060000   2.10453312
  0.92060000   2.10453075
  0.92060000   2.10452852
  0.92060000   2.10452640
  0.92060000   2.10452440
  0.92060000   2.10452250
  0.92060000   2.10452070
  0.92060000   2.10451898
  0.92060000   2.10451735
  0.92060000   2.10451580
  0.92070000   2.10538538
  0.92070000   2.10537837
  0.92070000   2.10537204
  0.92070000   2.10536629
  0.92070000   2.10536105
  0.92070000   2.10535625
  0.92070000   2.10535183
  0.92070000   2.10534776
  0.92070000   2.10534399
  0.92070000   2.10534048
  0.92070000   2.10533722
  0.92070000   2.10533417
  0.92070000   2.10533131
  0.92070000   2.10532864
  0.92070000   2.10532612
  0.92070000   2.10532375
  0.92070000   2.10532151
  0.92070000   2.10531940
  0.92070000   2.10531739
  0.92070000   2.10531549
  0.92070000   2.10531369
  0.92070000   2.10531198
  0.92070000   2.10531034
  0.92070000   2.10530879
  0.92080000   2.10617533
  0.92080000   2.10616832
  0.92080000   2.10616200
  0.92080000   2.10615625
  0.92080000   2.10615101
  0.92080000   2.10614621
  0.92080000   2.10614180
  0.92080000   2.10613772
  0.92080000   2.10613395
  0.92080000   2.10613044
  0.92080000   2.10612718
  0.92080000   2.10612413
  0.92080000   2.10612128
  0.92080000   2.10611860
  0.92080000   2.10611608
  0.92080000   2.10611371
  0.92080000   2.10611147
  0.92080000   2.10610935
  0.92080000   2.10610735
  0.92080000   2.10610545
  0.92080000   2.10610365
  0.92080000   2.10610193
  0.92080000   2.10610030
  0.92080000   2.10609874
  0.92090000   2.10696227
  0.92090000   2.10695527
  0.92090000   2.10694894
  0.92090000   2.10694320
  0.92090000   2.10693796
  0.92090000   2.10693316
  0.92090000   2.10692875
  0.92090000   2.10692467
  0.92090000   2.10692090
  0.92090000   2.10691739
  0.92090000   2.10691413
  0.92090000   2.10691108
  0.92090000   2.10690822
  0.92090000   2.10690554
  0.92090000   2.10690303
  0.92090000   2.10690065
  0.92090000   2.10689841
  0.92090000   2.10689630
  0.92090000   2.10689429
  0.92090000   2.10689239
  0.92090000   2.10689059
  0.92090000   2.10688887
  0.92090000   2.10688724
  0.92090000   2.10688568
  0.92100000   2.10774621
  0.92100000   2.10773921
  0.92100000   2.10773289
  0.92100000   2.10772715
  0.92100000   2.10772191
  0.92100000   2.10771711
  0.92100000   2.10771270
  0.92100000   2.10770862
  0.92100000   2.10770485
  0.92100000   2.10770134
  0.92100000   2.10769808
  0.92100000   2.10769503
  0.92100000   2.10769217
  0.92100000   2.10768950
  0.92100000   2.10768698
  0.92100000   2.10768460
  0.92100000   2.10768236
  0.92100000   2.10768025
  0.92100000   2.10767824
  0.92100000   2.10767634
  0.92100000   2.10767454
  0.92100000   2.10767282
  0.92100000   2.10767118
  0.92100000   2.10766962
  0.92110000   2.10852718
  0.92110000   2.10852018
  0.92110000   2.10851386
  0.92110000   2.10850812
  0.92110000   2.10850289
  0.92110000   2.10849809
  0.92110000   2.10849368
  0.92110000   2.10848960
  0.92110000   2.10848583
  0.92110000   2.10848232
  0.92110000   2.10847906
  0.92110000   2.10847601
  0.92110000   2.10847315
  0.92110000   2.10847047
  0.92110000   2.10846795
  0.92110000   2.10846558
  0.92110000   2.10846334
  0.92110000   2.10846122
  0.92110000   2.10845922
  0.92110000   2.10845731
  0.92110000   2.10845551
  0.92110000   2.10845379
  0.92110000   2.10845215
  0.92110000   2.10845059
  0.92120000   2.10930519
  0.92120000   2.10929820
  0.92120000   2.10929188
  0.92120000   2.10928614
  0.92120000   2.10928091
  0.92120000   2.10927611
  0.92120000   2.10927170
  0.92120000   2.10926762
  0.92120000   2.10926385
  0.92120000   2.10926034
  0.92120000   2.10925708
  0.92120000   2.10925403
  0.92120000   2.10925117
  0.92120000   2.10924849
  0.92120000   2.10924597
  0.92120000   2.10924360
  0.92120000   2.10924136
  0.92120000   2.10923924
  0.92120000   2.10923723
  0.92120000   2.10923533
  0.92120000   2.10923352
  0.92120000   2.10923180
  0.92120000   2.10923017
  0.92120000   2.10922861
  0.92130000   2.11008026
  0.92130000   2.11007327
  0.92130000   2.11006696
  0.92130000   2.11006122
  0.92130000   2.11005599
  0.92130000   2.11005120
  0.92130000   2.11004678
  0.92130000   2.11004271
  0.92130000   2.11003893
  0.92130000   2.11003543
  0.92130000   2.11003216
  0.92130000   2.11002911
  0.92130000   2.11002625
  0.92130000   2.11002357
  0.92130000   2.11002105
  0.92130000   2.11001868
  0.92130000   2.11001644
  0.92130000   2.11001432
  0.92130000   2.11001231
  0.92130000   2.11001041
  0.92130000   2.11000860
  0.92130000   2.11000688
  0.92130000   2.11000524
  0.92130000   2.11000368
  0.92140000   2.11085242
  0.92140000   2.11084544
  0.92140000   2.11083912
  0.92140000   2.11083339
  0.92140000   2.11082816
  0.92140000   2.11082336
  0.92140000   2.11081895
  0.92140000   2.11081488
  0.92140000   2.11081110
  0.92140000   2.11080760
  0.92140000   2.11080433
  0.92140000   2.11080128
  0.92140000   2.11079842
  0.92140000   2.11079574
  0.92140000   2.11079322
  0.92140000   2.11079084
  0.92140000   2.11078860
  0.92140000   2.11078648
  0.92140000   2.11078447
  0.92140000   2.11078257
  0.92140000   2.11078076
  0.92140000   2.11077904
  0.92140000   2.11077740
  0.92140000   2.11077584
  0.92150000   2.11162168
  0.92150000   2.11161470
  0.92150000   2.11160839
  0.92150000   2.11160266
  0.92150000   2.11159742
  0.92150000   2.11159263
  0.92150000   2.11158822
  0.92150000   2.11158414
  0.92150000   2.11158037
  0.92150000   2.11157686
  0.92150000   2.11157360
  0.92150000   2.11157055
  0.92150000   2.11156769
  0.92150000   2.11156501
  0.92150000   2.11156248
  0.92150000   2.11156011
  0.92150000   2.11155787
  0.92150000   2.11155575
  0.92150000   2.11155374
  0.92150000   2.11155183
  0.92150000   2.11155002
  0.92150000   2.11154830
  0.92150000   2.11154667
  0.92150000   2.11154510
  0.92160000   2.11238806
  0.92160000   2.11238108
  0.92160000   2.11237477
  0.92160000   2.11236904
  0.92160000   2.11236381
  0.92160000   2.11235902
  0.92160000   2.11235461
  0.92160000   2.11235053
  0.92160000   2.11234676
  0.92160000   2.11234325
  0.92160000   2.11233999
  0.92160000   2.11233693
  0.92160000   2.11233408
  0.92160000   2.11233139
  0.92160000   2.11232887
  0.92160000   2.11232649
  0.92160000   2.11232425
  0.92160000   2.11232213
  0.92160000   2.11232012
  0.92160000   2.11231822
  0.92160000   2.11231641
  0.92160000   2.11231469
  0.92160000   2.11231305
  0.92160000   2.11231148
  0.92170000   2.11315158
  0.92170000   2.11314460
  0.92170000   2.11313830
  0.92170000   2.11313257
  0.92170000   2.11312734
  0.92170000   2.11312255
  0.92170000   2.11311813
  0.92170000   2.11311406
  0.92170000   2.11311029
  0.92170000   2.11310678
  0.92170000   2.11310351
  0.92170000   2.11310046
  0.92170000   2.11309760
  0.92170000   2.11309492
  0.92170000   2.11309240
  0.92170000   2.11309002
  0.92170000   2.11308778
  0.92170000   2.11308565
  0.92170000   2.11308364
  0.92170000   2.11308174
  0.92170000   2.11307993
  0.92170000   2.11307821
  0.92170000   2.11307657
  0.92170000   2.11307500
  0.92180000   2.11391225
  0.92180000   2.11390528
  0.92180000   2.11389898
  0.92180000   2.11389325
  0.92180000   2.11388802
  0.92180000   2.11388323
  0.92180000   2.11387882
  0.92180000   2.11387475
  0.92180000   2.11387097
  0.92180000   2.11386747
  0.92180000   2.11386420
  0.92180000   2.11386114
  0.92180000   2.11385829
  0.92180000   2.11385560
  0.92180000   2.11385308
  0.92180000   2.11385070
  0.92180000   2.11384846
  0.92180000   2.11384633
  0.92180000   2.11384432
  0.92180000   2.11384242
  0.92180000   2.11384061
  0.92180000   2.11383888
  0.92180000   2.11383724
  0.92180000   2.11383568
  0.92190000   2.11467010
  0.92190000   2.11466313
  0.92190000   2.11465683
  0.92190000   2.11465111
  0.92190000   2.11464588
  0.92190000   2.11464109
  0.92190000   2.11463668
  0.92190000   2.11463261
  0.92190000   2.11462883
  0.92190000   2.11462533
  0.92190000   2.11462206
  0.92190000   2.11461900
  0.92190000   2.11461614
  0.92190000   2.11461346
  0.92190000   2.11461094
  0.92190000   2.11460856
  0.92190000   2.11460631
  0.92190000   2.11460419
  0.92190000   2.11460218
  0.92190000   2.11460027
  0.92190000   2.11459846
  0.92190000   2.11459674
  0.92190000   2.11459510
  0.92190000   2.11459353
  0.92200000   2.11542515
  0.92200000   2.11541818
  0.92200000   2.11541188
  0.92200000   2.11540616
  0.92200000   2.11540093
  0.92200000   2.11539614
  0.92200000   2.11539173
  0.92200000   2.11538766
  0.92200000   2.11538389
  0.92200000   2.11538038
  0.92200000   2.11537711
  0.92200000   2.11537406
  0.92200000   2.11537120
  0.92200000   2.11536851
  0.92200000   2.11536599
  0.92200000   2.11536361
  0.92200000   2.11536136
  0.92200000   2.11535924
  0.92200000   2.11535723
  0.92200000   2.11535532
  0.92200000   2.11535351
  0.92200000   2.11535178
  0.92200000   2.11535014
  0.92200000   2.11534858
  0.92210000   2.11617740
  0.92210000   2.11617044
  0.92210000   2.11616414
  0.92210000   2.11615842
  0.92210000   2.11615320
  0.92210000   2.11614841
  0.92210000   2.11614400
  0.92210000   2.11613993
  0.92210000   2.11613615
  0.92210000   2.11613264
  0.92210000   2.11612937
  0.92210000   2.11612632
  0.92210000   2.11612346
  0.92210000   2.11612078
  0.92210000   2.11611825
  0.92210000   2.11611587
  0.92210000   2.11611362
  0.92210000   2.11611150
  0.92210000   2.11610949
  0.92210000   2.11610758
  0.92210000   2.11610577
  0.92210000   2.11610404
  0.92210000   2.11610240
  0.92210000   2.11610083
  0.92220000   2.11692689
  0.92220000   2.11691993
  0.92220000   2.11691363
  0.92220000   2.11690791
  0.92220000   2.11690269
  0.92220000   2.11689790
  0.92220000   2.11689349
  0.92220000   2.11688942
  0.92220000   2.11688565
  0.92220000   2.11688214
  0.92220000   2.11687887
  0.92220000   2.11687581
  0.92220000   2.11687295
  0.92220000   2.11687027
  0.92220000   2.11686774
  0.92220000   2.11686536
  0.92220000   2.11686312
  0.92220000   2.11686099
  0.92220000   2.11685898
  0.92220000   2.11685707
  0.92220000   2.11685526
  0.92220000   2.11685353
  0.92220000   2.11685189
  0.92220000   2.11685032
  0.92230000   2.11767362
  0.92230000   2.11766666
  0.92230000   2.11766037
  0.92230000   2.11765465
  0.92230000   2.11764943
  0.92230000   2.11764464
  0.92230000   2.11764023
  0.92230000   2.11763616
  0.92230000   2.11763239
  0.92230000   2.11762888
  0.92230000   2.11762561
  0.92230000   2.11762255
  0.92230000   2.11761969
  0.92230000   2.11761701
  0.92230000   2.11761448
  0.92230000   2.11761210
  0.92230000   2.11760985
  0.92230000   2.11760773
  0.92230000   2.11760571
  0.92230000   2.11760380
  0.92230000   2.11760199
  0.92230000   2.11760026
  0.92230000   2.11759862
  0.92230000   2.11759705
  0.92240000   2.11841761
  0.92240000   2.11841066
  0.92240000   2.11840437
  0.92240000   2.11839866
  0.92240000   2.11839343
  0.92240000   2.11838865
  0.92240000   2.11838424
  0.92240000   2.11838017
  0.92240000   2.11837639
  0.92240000   2.11837288
  0.92240000   2.11836961
  0.92240000   2.11836656
  0.92240000   2.11836370
  0.92240000   2.11836101
  0.92240000   2.11835848
  0.92240000   2.11835610
  0.92240000   2.11835385
  0.92240000   2.11835173
  0.92240000   2.11834971
  0.92240000   2.11834780
  0.92240000   2.11834599
  0.92240000   2.11834426
  0.92240000   2.11834262
  0.92240000   2.11834105
  0.92250000   2.11915889
  0.92250000   2.11915194
  0.92250000   2.11914566
  0.92250000   2.11913994
  0.92250000   2.11913472
  0.92250000   2.11912993
  0.92250000   2.11912553
  0.92250000   2.11912145
  0.92250000   2.11911768
  0.92250000   2.11911417
  0.92250000   2.11911090
  0.92250000   2.11910785
  0.92250000   2.11910498
  0.92250000   2.11910230
  0.92250000   2.11909977
  0.92250000   2.11909739
  0.92250000   2.11909514
  0.92250000   2.11909301
  0.92250000   2.11909100
  0.92250000   2.11908909
  0.92250000   2.11908727
  0.92250000   2.11908554
  0.92250000   2.11908390
  0.92250000   2.11908233
  0.92260000   2.11989747
  0.92260000   2.11989052
  0.92260000   2.11988424
  0.92260000   2.11987852
  0.92260000   2.11987330
  0.92260000   2.11986852
  0.92260000   2.11986411
  0.92260000   2.11986004
  0.92260000   2.11985626
  0.92260000   2.11985276
  0.92260000   2.11984949
  0.92260000   2.11984643
  0.92260000   2.11984357
  0.92260000   2.11984088
  0.92260000   2.11983835
  0.92260000   2.11983597
  0.92260000   2.11983372
  0.92260000   2.11983159
  0.92260000   2.11982958
  0.92260000   2.11982767
  0.92260000   2.11982585
  0.92260000   2.11982412
  0.92260000   2.11982248
  0.92260000   2.11982091
  0.92270000   2.12063336
  0.92270000   2.12062642
  0.92270000   2.12062014
  0.92270000   2.12061442
  0.92270000   2.12060921
  0.92270000   2.12060442
  0.92270000   2.12060001
  0.92270000   2.12059594
  0.92270000   2.12059217
  0.92270000   2.12058866
  0.92270000   2.12058539
  0.92270000   2.12058233
  0.92270000   2.12057947
  0.92270000   2.12057678
  0.92270000   2.12057425
  0.92270000   2.12057187
  0.92270000   2.12056962
  0.92270000   2.12056749
  0.92270000   2.12056547
  0.92270000   2.12056356
  0.92270000   2.12056175
  0.92270000   2.12056002
  0.92270000   2.12055837
  0.92270000   2.12055680
  0.92280000   2.12136659
  0.92280000   2.12135965
  0.92280000   2.12135337
  0.92280000   2.12134765
  0.92280000   2.12134244
  0.92280000   2.12133765
  0.92280000   2.12133325
  0.92280000   2.12132917
  0.92280000   2.12132540
  0.92280000   2.12132189
  0.92280000   2.12131862
  0.92280000   2.12131556
  0.92280000   2.12131270
  0.92280000   2.12131001
  0.92280000   2.12130748
  0.92280000   2.12130510
  0.92280000   2.12130285
  0.92280000   2.12130072
  0.92280000   2.12129870
  0.92280000   2.12129679
  0.92280000   2.12129497
  0.92280000   2.12129324
  0.92280000   2.12129160
  0.92280000   2.12129003
  0.92290000   2.12209716
  0.92290000   2.12209022
  0.92290000   2.12208395
  0.92290000   2.12207824
  0.92290000   2.12207302
  0.92290000   2.12206824
  0.92290000   2.12206383
  0.92290000   2.12205976
  0.92290000   2.12205598
  0.92290000   2.12205247
  0.92290000   2.12204920
  0.92290000   2.12204615
  0.92290000   2.12204328
  0.92290000   2.12204059
  0.92290000   2.12203806
  0.92290000   2.12203568
  0.92290000   2.12203343
  0.92290000   2.12203130
  0.92290000   2.12202928
  0.92290000   2.12202737
  0.92290000   2.12202555
  0.92290000   2.12202382
  0.92290000   2.12202217
  0.92290000   2.12202060
  0.92300000   2.12282510
  0.92300000   2.12281817
  0.92300000   2.12281189
  0.92300000   2.12280618
  0.92300000   2.12280097
  0.92300000   2.12279618
  0.92300000   2.12279178
  0.92300000   2.12278771
  0.92300000   2.12278393
  0.92300000   2.12278042
  0.92300000   2.12277715
  0.92300000   2.12277409
  0.92300000   2.12277123
  0.92300000   2.12276854
  0.92300000   2.12276601
  0.92300000   2.12276363
  0.92300000   2.12276137
  0.92300000   2.12275924
  0.92300000   2.12275723
  0.92300000   2.12275531
  0.92300000   2.12275349
  0.92300000   2.12275176
  0.92300000   2.12275012
  0.92300000   2.12274854
  0.92310000   2.12355042
  0.92310000   2.12354349
  0.92310000   2.12353722
  0.92310000   2.12353151
  0.92310000   2.12352630
  0.92310000   2.12352151
  0.92310000   2.12351711
  0.92310000   2.12351304
  0.92310000   2.12350926
  0.92310000   2.12350575
  0.92310000   2.12350248
  0.92310000   2.12349942
  0.92310000   2.12349656
  0.92310000   2.12349387
  0.92310000   2.12349134
  0.92310000   2.12348895
  0.92310000   2.12348670
  0.92310000   2.12348457
  0.92310000   2.12348255
  0.92310000   2.12348064
  0.92310000   2.12347882
  0.92310000   2.12347709
  0.92310000   2.12347544
  0.92310000   2.12347387
  0.92320000   2.12427315
  0.92320000   2.12426622
  0.92320000   2.12425994
  0.92320000   2.12425424
  0.92320000   2.12424903
  0.92320000   2.12424424
  0.92320000   2.12423984
  0.92320000   2.12423577
  0.92320000   2.12423199
  0.92320000   2.12422848
  0.92320000   2.12422521
  0.92320000   2.12422215
  0.92320000   2.12421929
  0.92320000   2.12421660
  0.92320000   2.12421407
  0.92320000   2.12421168
  0.92320000   2.12420943
  0.92320000   2.12420730
  0.92320000   2.12420528
  0.92320000   2.12420336
  0.92320000   2.12420154
  0.92320000   2.12419981
  0.92320000   2.12419816
  0.92320000   2.12419659
  0.92330000   2.12499328
  0.92330000   2.12498635
  0.92330000   2.12498009
  0.92330000   2.12497438
  0.92330000   2.12496917
  0.92330000   2.12496439
  0.92330000   2.12495998
  0.92330000   2.12495591
  0.92330000   2.12495214
  0.92330000   2.12494863
  0.92330000   2.12494536
  0.92330000   2.12494230
  0.92330000   2.12493943
  0.92330000   2.12493674
  0.92330000   2.12493421
  0.92330000   2.12493182
  0.92330000   2.12492957
  0.92330000   2.12492744
  0.92330000   2.12492542
  0.92330000   2.12492350
  0.92330000   2.12492168
  0.92330000   2.12491995
  0.92330000   2.12491830
  0.92330000   2.12491673
  0.92340000   2.12571085
  0.92340000   2.12570392
  0.92340000   2.12569766
  0.92340000   2.12569195
  0.92340000   2.12568674
  0.92340000   2.12568196
  0.92340000   2.12567756
  0.92340000   2.12567349
  0.92340000   2.12566971
  0.92340000   2.12566620
  0.92340000   2.12566293
  0.92340000   2.12565987
  0.92340000   2.12565700
  0.92340000   2.12565431
  0.92340000   2.12565178
  0.92340000   2.12564939
  0.92340000   2.12564714
  0.92340000   2.12564501
  0.92340000   2.12564299
  0.92340000   2.12564107
  0.92340000   2.12563925
  0.92340000   2.12563752
  0.92340000   2.12563587
  0.92340000   2.12563429
  0.92350000   2.12642586
  0.92350000   2.12641894
  0.92350000   2.12641267
  0.92350000   2.12640697
  0.92350000   2.12640176
  0.92350000   2.12639698
  0.92350000   2.12639258
  0.92350000   2.12638851
  0.92350000   2.12638473
  0.92350000   2.12638122
  0.92350000   2.12637795
  0.92350000   2.12637489
  0.92350000   2.12637202
  0.92350000   2.12636933
  0.92350000   2.12636680
  0.92350000   2.12636441
  0.92350000   2.12636216
  0.92350000   2.12636003
  0.92350000   2.12635800
  0.92350000   2.12635609
  0.92350000   2.12635427
  0.92350000   2.12635253
  0.92350000   2.12635088
  0.92350000   2.12634931
  0.92360000   2.12713834
  0.92360000   2.12713142
  0.92360000   2.12712515
  0.92360000   2.12711945
  0.92360000   2.12711425
  0.92360000   2.12710947
  0.92360000   2.12710506
  0.92360000   2.12710099
  0.92360000   2.12709722
  0.92360000   2.12709371
  0.92360000   2.12709043
  0.92360000   2.12708737
  0.92360000   2.12708451
  0.92360000   2.12708181
  0.92360000   2.12707928
  0.92360000   2.12707689
  0.92360000   2.12707464
  0.92360000   2.12707250
  0.92360000   2.12707048
  0.92360000   2.12706857
  0.92360000   2.12706674
  0.92360000   2.12706501
  0.92360000   2.12706336
  0.92360000   2.12706178
  0.92370000   2.12784829
  0.92370000   2.12784137
  0.92370000   2.12783511
  0.92370000   2.12782941
  0.92370000   2.12782421
  0.92370000   2.12781943
  0.92370000   2.12781502
  0.92370000   2.12781095
  0.92370000   2.12780718
  0.92370000   2.12780367
  0.92370000   2.12780039
  0.92370000   2.12779733
  0.92370000   2.12779447
  0.92370000   2.12779177
  0.92370000   2.12778924
  0.92370000   2.12778685
  0.92370000   2.12778460
  0.92370000   2.12778246
  0.92370000   2.12778044
  0.92370000   2.12777852
  0.92370000   2.12777670
  0.92370000   2.12777496
  0.92370000   2.12777331
  0.92370000   2.12777174
  0.92380000   2.12855573
  0.92380000   2.12854882
  0.92380000   2.12854256
  0.92380000   2.12853687
  0.92380000   2.12853166
  0.92380000   2.12852688
  0.92380000   2.12852248
  0.92380000   2.12851841
  0.92380000   2.12851463
  0.92380000   2.12851112
  0.92380000   2.12850785
  0.92380000   2.12850479
  0.92380000   2.12850192
  0.92380000   2.12849923
  0.92380000   2.12849669
  0.92380000   2.12849430
  0.92380000   2.12849205
  0.92380000   2.12848991
  0.92380000   2.12848789
  0.92380000   2.12848597
  0.92380000   2.12848415
  0.92380000   2.12848241
  0.92380000   2.12848076
  0.92380000   2.12847918
  0.92390000   2.12926069
  0.92390000   2.12925378
  0.92390000   2.12924752
  0.92390000   2.12924183
  0.92390000   2.12923662
  0.92390000   2.12923184
  0.92390000   2.12922744
  0.92390000   2.12922337
  0.92390000   2.12921959
  0.92390000   2.12921608
  0.92390000   2.12921281
  0.92390000   2.12920975
  0.92390000   2.12920688
  0.92390000   2.12920419
  0.92390000   2.12920165
  0.92390000   2.12919926
  0.92390000   2.12919701
  0.92390000   2.12919487
  0.92390000   2.12919285
  0.92390000   2.12919093
  0.92390000   2.12918910
  0.92390000   2.12918737
  0.92390000   2.12918572
  0.92390000   2.12918414
  0.92400000   2.12996317
  0.92400000   2.12995626
  0.92400000   2.12995000
  0.92400000   2.12994431
  0.92400000   2.12993911
  0.92400000   2.12993433
  0.92400000   2.12992993
  0.92400000   2.12992586
  0.92400000   2.12992208
  0.92400000   2.12991857
  0.92400000   2.12991530
  0.92400000   2.12991223
  0.92400000   2.12990937
  0.92400000   2.12990667
  0.92400000   2.12990414
  0.92400000   2.12990175
  0.92400000   2.12989949
  0.92400000   2.12989735
  0.92400000   2.12989533
  0.92400000   2.12989341
  0.92400000   2.12989159
  0.92400000   2.12988985
  0.92400000   2.12988820
  0.92400000   2.12988662
  0.92410000   2.13066318
  0.92410000   2.13065628
  0.92410000   2.13065002
  0.92410000   2.13064433
  0.92410000   2.13063913
  0.92410000   2.13063435
  0.92410000   2.13062995
  0.92410000   2.13062588
  0.92410000   2.13062211
  0.92410000   2.13061859
  0.92410000   2.13061532
  0.92410000   2.13061226
  0.92410000   2.13060939
  0.92410000   2.13060669
  0.92410000   2.13060416
  0.92410000   2.13060177
  0.92410000   2.13059951
  0.92410000   2.13059737
  0.92410000   2.13059535
  0.92410000   2.13059343
  0.92410000   2.13059160
  0.92410000   2.13058987
  0.92410000   2.13058821
  0.92410000   2.13058663
  0.92420000   2.13136075
  0.92420000   2.13135385
  0.92420000   2.13134760
  0.92420000   2.13134191
  0.92420000   2.13133671
  0.92420000   2.13133193
  0.92420000   2.13132753
  0.92420000   2.13132346
  0.92420000   2.13131968
  0.92420000   2.13131617
  0.92420000   2.13131290
  0.92420000   2.13130984
  0.92420000   2.13130697
  0.92420000   2.13130427
  0.92420000   2.13130173
  0.92420000   2.13129934
  0.92420000   2.13129709
  0.92420000   2.13129495
  0.92420000   2.13129292
  0.92420000   2.13129100
  0.92420000   2.13128918
  0.92420000   2.13128744
  0.92420000   2.13128578
  0.92420000   2.13128421
  0.92430000   2.13205589
  0.92430000   2.13204899
  0.92430000   2.13204274
  0.92430000   2.13203705
  0.92430000   2.13203185
  0.92430000   2.13202708
  0.92430000   2.13202267
  0.92430000   2.13201860
  0.92430000   2.13201483
  0.92430000   2.13201132
  0.92430000   2.13200804
  0.92430000   2.13200498
  0.92430000   2.13200211
  0.92430000   2.13199942
  0.92430000   2.13199688
  0.92430000   2.13199449
  0.92430000   2.13199223
  0.92430000   2.13199009
  0.92430000   2.13198807
  0.92430000   2.13198614
  0.92430000   2.13198432
  0.92430000   2.13198258
  0.92430000   2.13198092
  0.92430000   2.13197935
  0.92440000   2.13274861
  0.92440000   2.13274172
  0.92440000   2.13273547
  0.92440000   2.13272978
  0.92440000   2.13272458
  0.92440000   2.13271980
  0.92440000   2.13271540
  0.92440000   2.13271133
  0.92440000   2.13270756
  0.92440000   2.13270405
  0.92440000   2.13270077
  0.92440000   2.13269771
  0.92440000   2.13269484
  0.92440000   2.13269214
  0.92440000   2.13268961
  0.92440000   2.13268721
  0.92440000   2.13268495
  0.92440000   2.13268282
  0.92440000   2.13268079
  0.92440000   2.13267887
  0.92440000   2.13267704
  0.92440000   2.13267530
  0.92440000   2.13267365
  0.92440000   2.13267207
  0.92450000   2.13343893
  0.92450000   2.13343204
  0.92450000   2.13342579
  0.92450000   2.13342011
  0.92450000   2.13341491
  0.92450000   2.13341013
  0.92450000   2.13340573
  0.92450000   2.13340166
  0.92450000   2.13339789
  0.92450000   2.13339437
  0.92450000   2.13339110
  0.92450000   2.13338804
  0.92450000   2.13338517
  0.92450000   2.13338247
  0.92450000   2.13337993
  0.92450000   2.13337754
  0.92450000   2.13337528
  0.92450000   2.13337314
  0.92450000   2.13337111
  0.92450000   2.13336919
  0.92450000   2.13336736
  0.92450000   2.13336563
  0.92450000   2.13336397
  0.92450000   2.13336239
  0.92460000   2.13412687
  0.92460000   2.13411997
  0.92460000   2.13411373
  0.92460000   2.13410804
  0.92460000   2.13410284
  0.92460000   2.13409807
  0.92460000   2.13409367
  0.92460000   2.13408960
  0.92460000   2.13408582
  0.92460000   2.13408231
  0.92460000   2.13407904
  0.92460000   2.13407597
  0.92460000   2.13407310
  0.92460000   2.13407041
  0.92460000   2.13406787
  0.92460000   2.13406548
  0.92460000   2.13406321
  0.92460000   2.13406108
  0.92460000   2.13405905
  0.92460000   2.13405713
  0.92460000   2.13405530
  0.92460000   2.13405356
  0.92460000   2.13405190
  0.92460000   2.13405032
  0.92470000   2.13481242
  0.92470000   2.13480553
  0.92470000   2.13479929
  0.92470000   2.13479361
  0.92470000   2.13478841
  0.92470000   2.13478363
  0.92470000   2.13477923
  0.92470000   2.13477517
  0.92470000   2.13477139
  0.92470000   2.13476788
  0.92470000   2.13476460
  0.92470000   2.13476154
  0.92470000   2.13475867
  0.92470000   2.13475597
  0.92470000   2.13475343
  0.92470000   2.13475104
  0.92470000   2.13474878
  0.92470000   2.13474664
  0.92470000   2.13474461
  0.92470000   2.13474269
  0.92470000   2.13474086
  0.92470000   2.13473912
  0.92470000   2.13473746
  0.92470000   2.13473588
  0.92480000   2.13549562
  0.92480000   2.13548873
  0.92480000   2.13548249
  0.92480000   2.13547681
  0.92480000   2.13547161
  0.92480000   2.13546684
  0.92480000   2.13546244
  0.92480000   2.13545837
  0.92480000   2.13545460
  0.92480000   2.13545108
  0.92480000   2.13544781
  0.92480000   2.13544474
  0.92480000   2.13544187
  0.92480000   2.13543917
  0.92480000   2.13543664
  0.92480000   2.13543424
  0.92480000   2.13543198
  0.92480000   2.13542984
  0.92480000   2.13542781
  0.92480000   2.13542589
  0.92480000   2.13542406
  0.92480000   2.13542232
  0.92480000   2.13542066
  0.92480000   2.13541908
  0.92490000   2.13617647
  0.92490000   2.13616959
  0.92490000   2.13616335
  0.92490000   2.13615767
  0.92490000   2.13615247
  0.92490000   2.13614770
  0.92490000   2.13614330
  0.92490000   2.13613923
  0.92490000   2.13613546
  0.92490000   2.13613194
  0.92490000   2.13612867
  0.92490000   2.13612560
  0.92490000   2.13612273
  0.92490000   2.13612003
  0.92490000   2.13611749
  0.92490000   2.13611510
  0.92490000   2.13611284
  0.92490000   2.13611070
  0.92490000   2.13610867
  0.92490000   2.13610674
  0.92490000   2.13610491
  0.92490000   2.13610317
  0.92490000   2.13610151
  0.92490000   2.13609993
  0.92500000   2.13685499
  0.92500000   2.13684811
  0.92500000   2.13684187
  0.92500000   2.13683619
  0.92500000   2.13683100
  0.92500000   2.13682623
  0.92500000   2.13682183
  0.92500000   2.13681776
  0.92500000   2.13681398
  0.92500000   2.13681047
  0.92500000   2.13680719
  0.92500000   2.13680413
  0.92500000   2.13680126
  0.92500000   2.13679856
  0.92500000   2.13679602
  0.92500000   2.13679362
  0.92500000   2.13679136
  0.92500000   2.13678922
  0.92500000   2.13678719
  0.92500000   2.13678527
  0.92500000   2.13678344
  0.92500000   2.13678170
  0.92500000   2.13678004
  0.92500000   2.13677845
  0.92510000   2.13753120
  0.92510000   2.13752432
  0.92510000   2.13751808
  0.92510000   2.13751240
  0.92510000   2.13750721
  0.92510000   2.13750244
  0.92510000   2.13749804
  0.92510000   2.13749397
  0.92510000   2.13749019
  0.92510000   2.13748668
  0.92510000   2.13748340
  0.92510000   2.13748034
  0.92510000   2.13747747
  0.92510000   2.13747477
  0.92510000   2.13747223
  0.92510000   2.13746983
  0.92510000   2.13746757
  0.92510000   2.13746543
  0.92510000   2.13746340
  0.92510000   2.13746147
  0.92510000   2.13745964
  0.92510000   2.13745790
  0.92510000   2.13745624
  0.92510000   2.13745466
  0.92520000   2.13820510
  0.92520000   2.13819822
  0.92520000   2.13819199
  0.92520000   2.13818631
  0.92520000   2.13818111
  0.92520000   2.13817634
  0.92520000   2.13817194
  0.92520000   2.13816788
  0.92520000   2.13816410
  0.92520000   2.13816059
  0.92520000   2.13815731
  0.92520000   2.13815425
  0.92520000   2.13815137
  0.92520000   2.13814867
  0.92520000   2.13814613
  0.92520000   2.13814374
  0.92520000   2.13814147
  0.92520000   2.13813933
  0.92520000   2.13813730
  0.92520000   2.13813537
  0.92520000   2.13813354
  0.92520000   2.13813180
  0.92520000   2.13813014
  0.92520000   2.13812856
  0.92530000   2.13887670
  0.92530000   2.13886983
  0.92530000   2.13886360
  0.92530000   2.13885792
  0.92530000   2.13885273
  0.92530000   2.13884796
  0.92530000   2.13884356
  0.92530000   2.13883949
  0.92530000   2.13883572
  0.92530000   2.13883220
  0.92530000   2.13882893
  0.92530000   2.13882586
  0.92530000   2.13882299
  0.92530000   2.13882029
  0.92530000   2.13881775
  0.92530000   2.13881535
  0.92530000   2.13881309
  0.92530000   2.13881094
  0.92530000   2.13880891
  0.92530000   2.13880699
  0.92530000   2.13880516
  0.92530000   2.13880341
  0.92530000   2.13880175
  0.92530000   2.13880017
  0.92540000   2.13954604
  0.92540000   2.13953916
  0.92540000   2.13953293
  0.92540000   2.13952726
  0.92540000   2.13952207
  0.92540000   2.13951730
  0.92540000   2.13951290
  0.92540000   2.13950883
  0.92540000   2.13950506
  0.92540000   2.13950154
  0.92540000   2.13949826
  0.92540000   2.13949520
  0.92540000   2.13949233
  0.92540000   2.13948963
  0.92540000   2.13948708
  0.92540000   2.13948469
  0.92540000   2.13948242
  0.92540000   2.13948028
  0.92540000   2.13947825
  0.92540000   2.13947632
  0.92540000   2.13947449
  0.92540000   2.13947275
  0.92540000   2.13947108
  0.92540000   2.13946950
  0.92550000   2.14021310
  0.92550000   2.14020623
  0.92550000   2.14020001
  0.92550000   2.14019433
  0.92550000   2.14018914
  0.92550000   2.14018437
  0.92550000   2.14017997
  0.92550000   2.14017591
  0.92550000   2.14017213
  0.92550000   2.14016862
  0.92550000   2.14016534
  0.92550000   2.14016227
  0.92550000   2.14015940
  0.92550000   2.14015670
  0.92550000   2.14015416
  0.92550000   2.14015176
  0.92550000   2.14014950
  0.92550000   2.14014735
  0.92550000   2.14014532
  0.92550000   2.14014339
  0.92550000   2.14014156
  0.92550000   2.14013982
  0.92550000   2.14013815
  0.92550000   2.14013657
  0.92560000   2.14087792
  0.92560000   2.14087105
  0.92560000   2.14086483
  0.92560000   2.14085916
  0.92560000   2.14085396
  0.92560000   2.14084920
  0.92560000   2.14084480
  0.92560000   2.14084073
  0.92560000   2.14083696
  0.92560000   2.14083344
  0.92560000   2.14083016
  0.92560000   2.14082710
  0.92560000   2.14082422
  0.92560000   2.14082152
  0.92560000   2.14081898
  0.92560000   2.14081658
  0.92560000   2.14081432
  0.92560000   2.14081217
  0.92560000   2.14081014
  0.92560000   2.14080821
  0.92560000   2.14080638
  0.92560000   2.14080464
  0.92560000   2.14080297
  0.92560000   2.14080139
  0.92570000   2.14154050
  0.92570000   2.14153364
  0.92570000   2.14152741
  0.92570000   2.14152174
  0.92570000   2.14151655
  0.92570000   2.14151178
  0.92570000   2.14150739
  0.92570000   2.14150332
  0.92570000   2.14149954
  0.92570000   2.14149603
  0.92570000   2.14149275
  0.92570000   2.14148969
  0.92570000   2.14148681
  0.92570000   2.14148411
  0.92570000   2.14148157
  0.92570000   2.14147917
  0.92570000   2.14147690
  0.92570000   2.14147476
  0.92570000   2.14147273
  0.92570000   2.14147080
  0.92570000   2.14146896
  0.92570000   2.14146722
  0.92570000   2.14146556
  0.92570000   2.14146397
  0.92580000   2.14220086
  0.92580000   2.14219400
  0.92580000   2.14218777
  0.92580000   2.14218210
  0.92580000   2.14217691
  0.92580000   2.14217215
  0.92580000   2.14216775
  0.92580000   2.14216368
  0.92580000   2.14215991
  0.92580000   2.14215639
  0.92580000   2.14215312
  0.92580000   2.14215005
  0.92580000   2.14214717
  0.92580000   2.14214447
  0.92580000   2.14214193
  0.92580000   2.14213953
  0.92580000   2.14213726
  0.92580000   2.14213512
  0.92580000   2.14213309
  0.92580000   2.14213116
  0.92580000   2.14212932
  0.92580000   2.14212758
  0.92580000   2.14212591
  0.92580000   2.14212433
  0.92590000   2.14285900
  0.92590000   2.14285214
  0.92590000   2.14284592
  0.92590000   2.14284025
  0.92590000   2.14283507
  0.92590000   2.14283030
  0.92590000   2.14282590
  0.92590000   2.14282183
  0.92590000   2.14281806
  0.92590000   2.14281455
  0.92590000   2.14281127
  0.92590000   2.14280820
  0.92590000   2.14280532
  0.92590000   2.14280262
  0.92590000   2.14280008
  0.92590000   2.14279768
  0.92590000   2.14279541
  0.92590000   2.14279327
  0.92590000   2.14279123
  0.92590000   2.14278930
  0.92590000   2.14278747
  0.92590000   2.14278572
  0.92590000   2.14278406
  0.92590000   2.14278247
  0.92600000   2.14351495
  0.92600000   2.14350809
  0.92600000   2.14350187
  0.92600000   2.14349621
  0.92600000   2.14349102
  0.92600000   2.14348625
  0.92600000   2.14348186
  0.92600000   2.14347779
  0.92600000   2.14347401
  0.92600000   2.14347050
  0.92600000   2.14346722
  0.92600000   2.14346415
  0.92600000   2.14346128
  0.92600000   2.14345858
  0.92600000   2.14345603
  0.92600000   2.14345363
  0.92600000   2.14345136
  0.92600000   2.14344922
  0.92600000   2.14344719
  0.92600000   2.14344525
  0.92600000   2.14344342
  0.92600000   2.14344167
  0.92600000   2.14344001
  0.92600000   2.14343842
  0.92610000   2.14416871
  0.92610000   2.14416186
  0.92610000   2.14415564
  0.92610000   2.14414997
  0.92610000   2.14414479
  0.92610000   2.14414002
  0.92610000   2.14413562
  0.92610000   2.14413156
  0.92610000   2.14412778
  0.92610000   2.14412427
  0.92610000   2.14412099
  0.92610000   2.14411792
  0.92610000   2.14411504
  0.92610000   2.14411234
  0.92610000   2.14410980
  0.92610000   2.14410740
  0.92610000   2.14410513
  0.92610000   2.14410298
  0.92610000   2.14410095
  0.92610000   2.14409902
  0.92610000   2.14409718
  0.92610000   2.14409544
  0.92610000   2.14409377
  0.92610000   2.14409218
  0.92620000   2.14482030
  0.92620000   2.14481345
  0.92620000   2.14480723
  0.92620000   2.14480157
  0.92620000   2.14479638
  0.92620000   2.14479161
  0.92620000   2.14478722
  0.92620000   2.14478315
  0.92620000   2.14477938
  0.92620000   2.14477586
  0.92620000   2.14477258
  0.92620000   2.14476952
  0.92620000   2.14476664
  0.92620000   2.14476394
  0.92620000   2.14476139
  0.92620000   2.14475899
  0.92620000   2.14475672
  0.92620000   2.14475458
  0.92620000   2.14475254
  0.92620000   2.14475061
  0.92620000   2.14474877
  0.92620000   2.14474703
  0.92620000   2.14474536
  0.92620000   2.14474377
  0.92630000   2.14546973
  0.92630000   2.14546288
  0.92630000   2.14545666
  0.92630000   2.14545100
  0.92630000   2.14544581
  0.92630000   2.14544105
  0.92630000   2.14543665
  0.92630000   2.14543259
  0.92630000   2.14542881
  0.92630000   2.14542530
  0.92630000   2.14542202
  0.92630000   2.14541895
  0.92630000   2.14541607
  0.92630000   2.14541337
  0.92630000   2.14541082
  0.92630000   2.14540842
  0.92630000   2.14540616
  0.92630000   2.14540401
  0.92630000   2.14540197
  0.92630000   2.14540004
  0.92630000   2.14539821
  0.92630000   2.14539646
  0.92630000   2.14539479
  0.92630000   2.14539320
  0.92640000   2.14611701
  0.92640000   2.14611016
  0.92640000   2.14610395
  0.92640000   2.14609828
  0.92640000   2.14609310
  0.92640000   2.14608834
  0.92640000   2.14608394
  0.92640000   2.14607987
  0.92640000   2.14607610
  0.92640000   2.14607258
  0.92640000   2.14606930
  0.92640000   2.14606624
  0.92640000   2.14606336
  0.92640000   2.14606066
  0.92640000   2.14605811
  0.92640000   2.14605571
  0.92640000   2.14605344
  0.92640000   2.14605129
  0.92640000   2.14604926
  0.92640000   2.14604732
  0.92640000   2.14604549
  0.92640000   2.14604374
  0.92640000   2.14604207
  0.92640000   2.14604048
  0.92650000   2.14676215
  0.92650000   2.14675530
  0.92650000   2.14674909
  0.92650000   2.14674343
  0.92650000   2.14673825
  0.92650000   2.14673349
  0.92650000   2.14672909
  0.92650000   2.14672502
  0.92650000   2.14672125
  0.92650000   2.14671774
  0.92650000   2.14671446
  0.92650000   2.14671139
  0.92650000   2.14670851
  0.92650000   2.14670580
  0.92650000   2.14670326
  0.92650000   2.14670086
  0.92650000   2.14669859
  0.92650000   2.14669644
  0.92650000   2.14669440
  0.92650000   2.14669247
  0.92650000   2.14669063
  0.92650000   2.14668889
  0.92650000   2.14668722
  0.92650000   2.14668563
  0.92660000   2.14740517
  0.92660000   2.14739833
  0.92660000   2.14739212
  0.92660000   2.14738646
  0.92660000   2.14738128
  0.92660000   2.14737651
  0.92660000   2.14737212
  0.92660000   2.14736805
  0.92660000   2.14736428
  0.92660000   2.14736076
  0.92660000   2.14735748
  0.92660000   2.14735441
  0.92660000   2.14735154
  0.92660000   2.14734883
  0.92660000   2.14734629
  0.92660000   2.14734388
  0.92660000   2.14734161
  0.92660000   2.14733947
  0.92660000   2.14733743
  0.92660000   2.14733550
  0.92660000   2.14733366
  0.92660000   2.14733191
  0.92660000   2.14733024
  0.92660000   2.14732865
  0.92670000   2.14804608
  0.92670000   2.14803924
  0.92670000   2.14803303
  0.92670000   2.14802737
  0.92670000   2.14802219
  0.92670000   2.14801743
  0.92670000   2.14801303
  0.92670000   2.14800897
  0.92670000   2.14800519
  0.92670000   2.14800168
  0.92670000   2.14799840
  0.92670000   2.14799533
  0.92670000   2.14799245
  0.92670000   2.14798975
  0.92670000   2.14798720
  0.92670000   2.14798480
  0.92670000   2.14798253
  0.92670000   2.14798038
  0.92670000   2.14797834
  0.92670000   2.14797641
  0.92670000   2.14797457
  0.92670000   2.14797282
  0.92670000   2.14797115
  0.92670000   2.14796956
  0.92680000   2.14868489
  0.92680000   2.14867805
  0.92680000   2.14867184
  0.92680000   2.14866619
  0.92680000   2.14866101
  0.92680000   2.14865624
  0.92680000   2.14865185
  0.92680000   2.14864779
  0.92680000   2.14864401
  0.92680000   2.14864050
  0.92680000   2.14863721
  0.92680000   2.14863415
  0.92680000   2.14863127
  0.92680000   2.14862856
  0.92680000   2.14862601
  0.92680000   2.14862361
  0.92680000   2.14862134
  0.92680000   2.14861919
  0.92680000   2.14861716
  0.92680000   2.14861522
  0.92680000   2.14861338
  0.92680000   2.14861163
  0.92680000   2.14860996
  0.92680000   2.14860837
  0.92690000   2.14932161
  0.92690000   2.14931477
  0.92690000   2.14930857
  0.92690000   2.14930291
  0.92690000   2.14929773
  0.92690000   2.14929297
  0.92690000   2.14928858
  0.92690000   2.14928451
  0.92690000   2.14928074
  0.92690000   2.14927722
  0.92690000   2.14927394
  0.92690000   2.14927087
  0.92690000   2.14926800
  0.92690000   2.14926529
  0.92690000   2.14926274
  0.92690000   2.14926034
  0.92690000   2.14925807
  0.92690000   2.14925592
  0.92690000   2.14925388
  0.92690000   2.14925195
  0.92690000   2.14925011
  0.92690000   2.14924836
  0.92690000   2.14924669
  0.92690000   2.14924510
  0.92700000   2.14995626
  0.92700000   2.14994942
  0.92700000   2.14994322
  0.92700000   2.14993757
  0.92700000   2.14993239
  0.92700000   2.14992763
  0.92700000   2.14992323
  0.92700000   2.14991917
  0.92700000   2.14991539
  0.92700000   2.14991188
  0.92700000   2.14990860
  0.92700000   2.14990553
  0.92700000   2.14990265
  0.92700000   2.14989994
  0.92700000   2.14989740
  0.92700000   2.14989499
  0.92700000   2.14989272
  0.92700000   2.14989057
  0.92700000   2.14988853
  0.92700000   2.14988660
  0.92700000   2.14988476
  0.92700000   2.14988301
  0.92700000   2.14988134
  0.92700000   2.14987974
  0.92710000   2.15058884
  0.92710000   2.15058201
  0.92710000   2.15057581
  0.92710000   2.15057015
  0.92710000   2.15056498
  0.92710000   2.15056022
  0.92710000   2.15055582
  0.92710000   2.15055176
  0.92710000   2.15054798
  0.92710000   2.15054447
  0.92710000   2.15054119
  0.92710000   2.15053812
  0.92710000   2.15053524
  0.92710000   2.15053253
  0.92710000   2.15052998
  0.92710000   2.15052758
  0.92710000   2.15052531
  0.92710000   2.15052316
  0.92710000   2.15052112
  0.92710000   2.15051918
  0.92710000   2.15051734
  0.92710000   2.15051559
  0.92710000   2.15051392
  0.92710000   2.15051233
  0.92720000   2.15121937
  0.92720000   2.15121254
  0.92720000   2.15120634
  0.92720000   2.15120069
  0.92720000   2.15119551
  0.92720000   2.15119075
  0.92720000   2.15118636
  0.92720000   2.15118230
  0.92720000   2.15117852
  0.92720000   2.15117501
  0.92720000   2.15117172
  0.92720000   2.15116865
  0.92720000   2.15116577
  0.92720000   2.15116307
  0.92720000   2.15116052
  0.92720000   2.15115812
  0.92720000   2.15115584
  0.92720000   2.15115369
  0.92720000   2.15115165
  0.92720000   2.15114972
  0.92720000   2.15114788
  0.92720000   2.15114613
  0.92720000   2.15114446
  0.92720000   2.15114286
  0.92730000   2.15184786
  0.92730000   2.15184103
  0.92730000   2.15183484
  0.92730000   2.15182918
  0.92730000   2.15182401
  0.92730000   2.15181925
  0.92730000   2.15181486
  0.92730000   2.15181079
  0.92730000   2.15180702
  0.92730000   2.15180350
  0.92730000   2.15180022
  0.92730000   2.15179715
  0.92730000   2.15179427
  0.92730000   2.15179156
  0.92730000   2.15178902
  0.92730000   2.15178661
  0.92730000   2.15178434
  0.92730000   2.15178219
  0.92730000   2.15178015
  0.92730000   2.15177821
  0.92730000   2.15177637
  0.92730000   2.15177462
  0.92730000   2.15177295
  0.92730000   2.15177135
  0.92740000   2.15247432
  0.92740000   2.15246750
  0.92740000   2.15246130
  0.92740000   2.15245565
  0.92740000   2.15245048
  0.92740000   2.15244572
  0.92740000   2.15244133
  0.92740000   2.15243726
  0.92740000   2.15243349
  0.92740000   2.15242997
  0.92740000   2.15242669
  0.92740000   2.15242362
  0.92740000   2.15242074
  0.92740000   2.15241803
  0.92740000   2.15241548
  0.92740000   2.15241308
  0.92740000   2.15241080
  0.92740000   2.15240865
  0.92740000   2.15240661
  0.92740000   2.15240468
  0.92740000   2.15240284
  0.92740000   2.15240108
  0.92740000   2.15239941
  0.92740000   2.15239782
  0.92750000   2.15309877
  0.92750000   2.15309194
  0.92750000   2.15308575
  0.92750000   2.15308010
  0.92750000   2.15307492
  0.92750000   2.15307017
  0.92750000   2.15306578
  0.92750000   2.15306171
  0.92750000   2.15305794
  0.92750000   2.15305442
  0.92750000   2.15305114
  0.92750000   2.15304807
  0.92750000   2.15304519
  0.92750000   2.15304248
  0.92750000   2.15303993
  0.92750000   2.15303753
  0.92750000   2.15303525
  0.92750000   2.15303310
  0.92750000   2.15303106
  0.92750000   2.15302912
  0.92750000   2.15302728
  0.92750000   2.15302553
  0.92750000   2.15302386
  0.92750000   2.15302226
  0.92760000   2.15372120
  0.92760000   2.15371438
  0.92760000   2.15370819
  0.92760000   2.15370254
  0.92760000   2.15369737
  0.92760000   2.15369261
  0.92760000   2.15368822
  0.92760000   2.15368415
  0.92760000   2.15368038
  0.92760000   2.15367687
  0.92760000   2.15367358
  0.92760000   2.15367051
  0.92760000   2.15366763
  0.92760000   2.15366492
  0.92760000   2.15366237
  0.92760000   2.15365997
  0.92760000   2.15365770
  0.92760000   2.15365554
  0.92760000   2.15365350
  0.92760000   2.15365156
  0.92760000   2.15364972
  0.92760000   2.15364797
  0.92760000   2.15364630
  0.92760000   2.15364470
  0.92770000   2.15434165
  0.92770000   2.15433483
  0.92770000   2.15432863
  0.92770000   2.15432299
  0.92770000   2.15431781
  0.92770000   2.15431306
  0.92770000   2.15430867
  0.92770000   2.15430460
  0.92770000   2.15430083
  0.92770000   2.15429731
  0.92770000   2.15429403
  0.92770000   2.15429096
  0.92770000   2.15428808
  0.92770000   2.15428537
  0.92770000   2.15428282
  0.92770000   2.15428042
  0.92770000   2.15427814
  0.92770000   2.15427599
  0.92770000   2.15427395
  0.92770000   2.15427201
  0.92770000   2.15427017
  0.92770000   2.15426841
  0.92770000   2.15426674
  0.92770000   2.15426515
  0.92780000   2.15496010
  0.92780000   2.15495329
  0.92780000   2.15494710
  0.92780000   2.15494145
  0.92780000   2.15493628
  0.92780000   2.15493152
  0.92780000   2.15492713
  0.92780000   2.15492307
  0.92780000   2.15491929
  0.92780000   2.15491578
  0.92780000   2.15491250
  0.92780000   2.15490942
  0.92780000   2.15490654
  0.92780000   2.15490384
  0.92780000   2.15490129
  0.92780000   2.15489888
  0.92780000   2.15489660
  0.92780000   2.15489445
  0.92780000   2.15489241
  0.92780000   2.15489047
  0.92780000   2.15488863
  0.92780000   2.15488687
  0.92780000   2.15488520
  0.92780000   2.15488361
  0.92790000   2.15557659
  0.92790000   2.15556977
  0.92790000   2.15556358
  0.92790000   2.15555794
  0.92790000   2.15555277
  0.92790000   2.15554801
  0.92790000   2.15554362
  0.92790000   2.15553956
  0.92790000   2.15553579
  0.92790000   2.15553227
  0.92790000   2.15552899
  0.92790000   2.15552592
  0.92790000   2.15552303
  0.92790000   2.15552033
  0.92790000   2.15551778
  0.92790000   2.15551537
  0.92790000   2.15551309
  0.92790000   2.15551094
  0.92790000   2.15550890
  0.92790000   2.15550696
  0.92790000   2.15550512
  0.92790000   2.15550336
  0.92790000   2.15550169
  0.92790000   2.15550009
  0.92800000   2.15619111
  0.92800000   2.15618430
  0.92800000   2.15617811
  0.92800000   2.15617247
  0.92800000   2.15616730
  0.92800000   2.15616254
  0.92800000   2.15615815
  0.92800000   2.15615409
  0.92800000   2.15615031
  0.92800000   2.15614680
  0.92800000   2.15614352
  0.92800000   2.15614045
  0.92800000   2.15613756
  0.92800000   2.15613486
  0.92800000   2.15613230
  0.92800000   2.15612990
  0.92800000   2.15612762
  0.92800000   2.15612547
  0.92800000   2.15612343
  0.92800000   2.15612149
  0.92800000   2.15611964
  0.92800000   2.15611789
  0.92800000   2.15611622
  0.92800000   2.15611462
  0.92810000   2.15680368
  0.92810000   2.15679687
  0.92810000   2.15679069
  0.92810000   2.15678504
  0.92810000   2.15677987
  0.92810000   2.15677512
  0.92810000   2.15677073
  0.92810000   2.15676667
  0.92810000   2.15676289
  0.92810000   2.15675938
  0.92810000   2.15675610
  0.92810000   2.15675302
  0.92810000   2.15675014
  0.92810000   2.15674743
  0.92810000   2.15674488
  0.92810000   2.15674247
  0.92810000   2.15674020
  0.92810000   2.15673804
  0.92810000   2.15673600
  0.92810000   2.15673406
  0.92810000   2.15673222
  0.92810000   2.15673046
  0.92810000   2.15672879
  0.92820000   2.15741431
  0.92820000   2.15740750
  0.92820000   2.15740132
  0.92820000   2.15739568
  0.92820000   2.15739051
  0.92820000   2.15738576
  0.92820000   2.15738137
  0.92820000   2.15737730
  0.92820000   2.15737353
  0.92820000   2.15737002
  0.92820000   2.15736673
  0.92820000   2.15736366
  0.92820000   2.15736078
  0.92820000   2.15735807
  0.92820000   2.15735552
  0.92820000   2.15735311
  0.92820000   2.15735083
  0.92820000   2.15734868
  0.92820000   2.15734664
  0.92820000   2.15734470
  0.92820000   2.15734285
  0.92820000   2.15734110
  0.92820000   2.15733942
  0.92830000   2.15802301
  0.92830000   2.15801621
  0.92830000   2.15801002
  0.92830000   2.15800438
  0.92830000   2.15799922
  0.92830000   2.15799446
  0.92830000   2.15799008
  0.92830000   2.15798601
  0.92830000   2.15798224
  0.92830000   2.15797872
  0.92830000   2.15797544
  0.92830000   2.15797237
  0.92830000   2.15796949
  0.92830000   2.15796678
  0.92830000   2.15796422
  0.92830000   2.15796182
  0.92830000   2.15795954
  0.92830000   2.15795739
  0.92830000   2.15795534
  0.92830000   2.15795340
  0.92830000   2.15795156
  0.92830000   2.15794980
  0.92830000   2.15794813
  0.92840000   2.15862980
  0.92840000   2.15862299
  0.92840000   2.15861681
  0.92840000   2.15861117
  0.92840000   2.15860600
  0.92840000   2.15860125
  0.92840000   2.15859686
  0.92840000   2.15859280
  0.92840000   2.15858903
  0.92840000   2.15858551
  0.92840000   2.15858223
  0.92840000   2.15857916
  0.92840000   2.15857627
  0.92840000   2.15857356
  0.92840000   2.15857101
  0.92840000   2.15856860
  0.92840000   2.15856633
  0.92840000   2.15856417
  0.92840000   2.15856213
  0.92840000   2.15856019
  0.92840000   2.15855834
  0.92840000   2.15855659
  0.92840000   2.15855491
  0.92850000   2.15923467
  0.92850000   2.15922787
  0.92850000   2.15922169
  0.92850000   2.15921605
  0.92850000   2.15921088
  0.92850000   2.15920613
  0.92850000   2.15920174
  0.92850000   2.15919768
  0.92850000   2.15919391
  0.92850000   2.15919039
  0.92850000   2.15918711
  0.92850000   2.15918404
  0.92850000   2.15918115
  0.92850000   2.15917844
  0.92850000   2.15917589
  0.92850000   2.15917348
  0.92850000   2.15917121
  0.92850000   2.15916905
  0.92850000   2.15916701
  0.92850000   2.15916507
  0.92850000   2.15916322
  0.92850000   2.15916146
  0.92850000   2.15915979
  0.92860000   2.15983764
  0.92860000   2.15983084
  0.92860000   2.15982467
  0.92860000   2.15981903
  0.92860000   2.15981386
  0.92860000   2.15980911
  0.92860000   2.15980473
  0.92860000   2.15980066
  0.92860000   2.15979689
  0.92860000   2.15979337
  0.92860000   2.15979009
  0.92860000   2.15978702
  0.92860000   2.15978414
  0.92860000   2.15978143
  0.92860000   2.15977887
  0.92860000   2.15977646
  0.92860000   2.15977419
  0.92860000   2.15977203
  0.92860000   2.15976999
  0.92860000   2.15976805
  0.92860000   2.15976620
  0.92860000   2.15976444
  0.92860000   2.15976277
  0.92870000   2.16043873
  0.92870000   2.16043193
  0.92870000   2.16042576
  0.92870000   2.16042012
  0.92870000   2.16041496
  0.92870000   2.16041021
  0.92870000   2.16040582
  0.92870000   2.16040176
  0.92870000   2.16039798
  0.92870000   2.16039447
  0.92870000   2.16039119
  0.92870000   2.16038811
  0.92870000   2.16038523
  0.92870000   2.16038252
  0.92870000   2.16037997
  0.92870000   2.16037756
  0.92870000   2.16037528
  0.92870000   2.16037312
  0.92870000   2.16037108
  0.92870000   2.16036914
  0.92870000   2.16036729
  0.92870000   2.16036553
  0.92870000   2.16036386
  0.92880000   2.16103794
  0.92880000   2.16103114
  0.92880000   2.16102497
  0.92880000   2.16101934
  0.92880000   2.16101417
  0.92880000   2.16100942
  0.92880000   2.16100504
  0.92880000   2.16100097
  0.92880000   2.16099720
  0.92880000   2.16099369
  0.92880000   2.16099040
  0.92880000   2.16098733
  0.92880000   2.16098445
  0.92880000   2.16098174
  0.92880000   2.16097918
  0.92880000   2.16097677
  0.92880000   2.16097450
  0.92880000   2.16097234
  0.92880000   2.16097029
  0.92880000   2.16096835
  0.92880000   2.16096651
  0.92880000   2.16096475
  0.92880000   2.16096307
  0.92890000   2.16163528
  0.92890000   2.16162849
  0.92890000   2.16162232
  0.92890000   2.16161668
  0.92890000   2.16161152
  0.92890000   2.16160677
  0.92890000   2.16160239
  0.92890000   2.16159832
  0.92890000   2.16159455
  0.92890000   2.16159104
  0.92890000   2.16158775
  0.92890000   2.16158468
  0.92890000   2.16158180
  0.92890000   2.16157908
  0.92890000   2.16157653
  0.92890000   2.16157412
  0.92890000   2.16157184
  0.92890000   2.16156969
  0.92890000   2.16156764
  0.92890000   2.16156570
  0.92890000   2.16156385
  0.92890000   2.16156209
  0.92890000   2.16156042
  0.92900000   2.16223077
  0.92900000   2.16222398
  0.92900000   2.16221781
  0.92900000   2.16221217
  0.92900000   2.16220701
  0.92900000   2.16220226
  0.92900000   2.16219788
  0.92900000   2.16219382
  0.92900000   2.16219004
  0.92900000   2.16218653
  0.92900000   2.16218324
  0.92900000   2.16218017
  0.92900000   2.16217729
  0.92900000   2.16217458
  0.92900000   2.16217202
  0.92900000   2.16216961
  0.92900000   2.16216733
  0.92900000   2.16216518
  0.92900000   2.16216313
  0.92900000   2.16216119
  0.92900000   2.16215934
  0.92900000   2.16215758
  0.92900000   2.16215591
  0.92910000   2.16282441
  0.92910000   2.16281762
  0.92910000   2.16281145
  0.92910000   2.16280582
  0.92910000   2.16280066
  0.92910000   2.16279591
  0.92910000   2.16279152
  0.92910000   2.16278746
  0.92910000   2.16278369
  0.92910000   2.16278017
  0.92910000   2.16277689
  0.92910000   2.16277382
  0.92910000   2.16277093
  0.92910000   2.16276822
  0.92910000   2.16276567
  0.92910000   2.16276326
  0.92910000   2.16276098
  0.92910000   2.16275882
  0.92910000   2.16275678
  0.92910000   2.16275483
  0.92910000   2.16275299
  0.92910000   2.16275123
  0.92910000   2.16274955
  0.92920000   2.16341621
  0.92920000   2.16340942
  0.92920000   2.16340325
  0.92920000   2.16339762
  0.92920000   2.16339246
  0.92920000   2.16338771
  0.92920000   2.16338333
  0.92920000   2.16337927
  0.92920000   2.16337550
  0.92920000   2.16337198
  0.92920000   2.16336870
  0.92920000   2.16336563
  0.92920000   2.16336274
  0.92920000   2.16336003
  0.92920000   2.16335748
  0.92920000   2.16335507
  0.92920000   2.16335279
  0.92920000   2.16335063
  0.92920000   2.16334858
  0.92920000   2.16334664
  0.92920000   2.16334479
  0.92920000   2.16334303
  0.92920000   2.16334135
  0.92930000   2.16400618
  0.92930000   2.16399940
  0.92930000   2.16399323
  0.92930000   2.16398760
  0.92930000   2.16398244
  0.92930000   2.16397769
  0.92930000   2.16397331
  0.92930000   2.16396925
  0.92930000   2.16396548
  0.92930000   2.16396196
  0.92930000   2.16395868
  0.92930000   2.16395561
  0.92930000   2.16395272
  0.92930000   2.16395001
  0.92930000   2.16394746
  0.92930000   2.16394505
  0.92930000   2.16394277
  0.92930000   2.16394061
  0.92930000   2.16393856
  0.92930000   2.16393662
  0.92930000   2.16393477
  0.92930000   2.16393301
  0.92930000   2.16393133
  0.92940000   2.16459434
  0.92940000   2.16458756
  0.92940000   2.16458139
  0.92940000   2.16457576
  0.92940000   2.16457060
  0.92940000   2.16456586
  0.92940000   2.16456147
  0.92940000   2.16455741
  0.92940000   2.16455364
  0.92940000   2.16455013
  0.92940000   2.16454684
  0.92940000   2.16454377
  0.92940000   2.16454089
  0.92940000   2.16453817
  0.92940000   2.16453562
  0.92940000   2.16453321
  0.92940000   2.16453093
  0.92940000   2.16452877
  0.92940000   2.16452672
  0.92940000   2.16452478
  0.92940000   2.16452293
  0.92940000   2.16452117
  0.92940000   2.16451949
  0.92950000   2.16518069
  0.92950000   2.16517391
  0.92950000   2.16516774
  0.92950000   2.16516212
  0.92950000   2.16515696
  0.92950000   2.16515221
  0.92950000   2.16514783
  0.92950000   2.16514377
  0.92950000   2.16514000
  0.92950000   2.16513648
  0.92950000   2.16513320
  0.92950000   2.16513013
  0.92950000   2.16512724
  0.92950000   2.16512453
  0.92950000   2.16512198
  0.92950000   2.16511956
  0.92950000   2.16511728
  0.92950000   2.16511513
  0.92950000   2.16511308
  0.92950000   2.16511114
  0.92950000   2.16510929
  0.92950000   2.16510753
  0.92950000   2.16510585
  0.92960000   2.16576524
  0.92960000   2.16575846
  0.92960000   2.16575230
  0.92960000   2.16574667
  0.92960000   2.16574152
  0.92960000   2.16573677
  0.92960000   2.16573239
  0.92960000   2.16572833
  0.92960000   2.16572456
  0.92960000   2.16572104
  0.92960000   2.16571776
  0.92960000   2.16571469
  0.92960000   2.16571180
  0.92960000   2.16570909
  0.92960000   2.16570653
  0.92960000   2.16570412
  0.92960000   2.16570184
  0.92960000   2.16569968
  0.92960000   2.16569764
  0.92960000   2.16569569
  0.92960000   2.16569384
  0.92960000   2.16569208
  0.92960000   2.16569040
  0.92970000   2.16634800
  0.92970000   2.16634123
  0.92970000   2.16633507
  0.92970000   2.16632944
  0.92970000   2.16632429
  0.92970000   2.16631954
  0.92970000   2.16631516
  0.92970000   2.16631110
  0.92970000   2.16630733
  0.92970000   2.16630381
  0.92970000   2.16630053
  0.92970000   2.16629746
  0.92970000   2.16629457
  0.92970000   2.16629186
  0.92970000   2.16628930
  0.92970000   2.16628689
  0.92970000   2.16628461
  0.92970000   2.16628245
  0.92970000   2.16628040
  0.92970000   2.16627846
  0.92970000   2.16627661
  0.92970000   2.16627485
  0.92970000   2.16627317
  0.92980000   2.16692899
  0.92980000   2.16692221
  0.92980000   2.16691605
  0.92980000   2.16691043
  0.92980000   2.16690528
  0.92980000   2.16690053
  0.92980000   2.16689615
  0.92980000   2.16689209
  0.92980000   2.16688832
  0.92980000   2.16688481
  0.92980000   2.16688152
  0.92980000   2.16687845
  0.92980000   2.16687556
  0.92980000   2.16687285
  0.92980000   2.16687030
  0.92980000   2.16686788
  0.92980000   2.16686560
  0.92980000   2.16686344
  0.92980000   2.16686140
  0.92980000   2.16685945
  0.92980000   2.16685760
  0.92980000   2.16685584
  0.92980000   2.16685416
  0.92990000   2.16750820
  0.92990000   2.16750143
  0.92990000   2.16749527
  0.92990000   2.16748965
  0.92990000   2.16748450
  0.92990000   2.16747975
  0.92990000   2.16747537
  0.92990000   2.16747131
  0.92990000   2.16746754
  0.92990000   2.16746403
  0.92990000   2.16746075
  0.92990000   2.16745767
  0.92990000   2.16745479
  0.92990000   2.16745207
  0.92990000   2.16744952
  0.92990000   2.16744711
  0.92990000   2.16744482
  0.92990000   2.16744267
  0.92990000   2.16744062
  0.92990000   2.16743867
  0.92990000   2.16743682
  0.92990000   2.16743506
  0.92990000   2.16743338
  0.93000000   2.16808566
  0.93000000   2.16807889
  0.93000000   2.16807273
  0.93000000   2.16806711
  0.93000000   2.16806196
  0.93000000   2.16805722
  0.93000000   2.16805284
  0.93000000   2.16804878
  0.93000000   2.16804501
  0.93000000   2.16804149
  0.93000000   2.16803821
  0.93000000   2.16803513
  0.93000000   2.16803225
  0.93000000   2.16802954
  0.93000000   2.16802698
  0.93000000   2.16802457
  0.93000000   2.16802229
  0.93000000   2.16802013
  0.93000000   2.16801808
  0.93000000   2.16801613
  0.93000000   2.16801428
  0.93000000   2.16801252
  0.93000000   2.16801084
  0.93010000   2.16866137
  0.93010000   2.16865460
  0.93010000   2.16864844
  0.93010000   2.16864282
  0.93010000   2.16863767
  0.93010000   2.16863293
  0.93010000   2.16862855
  0.93010000   2.16862449
  0.93010000   2.16862072
  0.93010000   2.16861720
  0.93010000   2.16861392
  0.93010000   2.16861085
  0.93010000   2.16860796
  0.93010000   2.16860525
  0.93010000   2.16860269
  0.93010000   2.16860028
  0.93010000   2.16859800
  0.93010000   2.16859584
  0.93010000   2.16859379
  0.93010000   2.16859184
  0.93010000   2.16858999
  0.93010000   2.16858823
  0.93010000   2.16858655
  0.93020000   2.16923533
  0.93020000   2.16922856
  0.93020000   2.16922241
  0.93020000   2.16921679
  0.93020000   2.16921164
  0.93020000   2.16920690
  0.93020000   2.16920252
  0.93020000   2.16919846
  0.93020000   2.16919469
  0.93020000   2.16919118
  0.93020000   2.16918789
  0.93020000   2.16918482
  0.93020000   2.16918193
  0.93020000   2.16917922
  0.93020000   2.16917666
  0.93020000   2.16917425
  0.93020000   2.16917197
  0.93020000   2.16916981
  0.93020000   2.16916776
  0.93020000   2.16916581
  0.93020000   2.16916396
  0.93020000   2.16916220
  0.93020000   2.16916052
  0.93030000   2.16980756
  0.93030000   2.16980080
  0.93030000   2.16979465
  0.93030000   2.16978903
  0.93030000   2.16978388
  0.93030000   2.16977914
  0.93030000   2.16977476
  0.93030000   2.16977070
  0.93030000   2.16976693
  0.93030000   2.16976342
  0.93030000   2.16976013
  0.93030000   2.16975706
  0.93030000   2.16975417
  0.93030000   2.16975146
  0.93030000   2.16974890
  0.93030000   2.16974649
  0.93030000   2.16974421
  0.93030000   2.16974205
  0.93030000   2.16974000
  0.93030000   2.16973805
  0.93030000   2.16973620
  0.93030000   2.16973444
  0.93030000   2.16973276
  0.93040000   2.17037807
  0.93040000   2.17037131
  0.93040000   2.17036516
  0.93040000   2.17035954
  0.93040000   2.17035439
  0.93040000   2.17034965
  0.93040000   2.17034528
  0.93040000   2.17034122
  0.93040000   2.17033745
  0.93040000   2.17033393
  0.93040000   2.17033065
  0.93040000   2.17032758
  0.93040000   2.17032469
  0.93040000   2.17032198
  0.93040000   2.17031942
  0.93040000   2.17031701
  0.93040000   2.17031472
  0.93040000   2.17031256
  0.93040000   2.17031052
  0.93040000   2.17030857
  0.93040000   2.17030672
  0.93040000   2.17030495
  0.93040000   2.17030327
  0.93050000   2.17094687
  0.93050000   2.17094010
  0.93050000   2.17093396
  0.93050000   2.17092834
  0.93050000   2.17092320
  0.93050000   2.17091846
  0.93050000   2.17091408
  0.93050000   2.17091002
  0.93050000   2.17090625
  0.93050000   2.17090274
  0.93050000   2.17089945
  0.93050000   2.17089638
  0.93050000   2.17089349
  0.93050000   2.17089078
  0.93050000   2.17088822
  0.93050000   2.17088581
  0.93050000   2.17088353
  0.93050000   2.17088137
  0.93050000   2.17087932
  0.93050000   2.17087737
  0.93050000   2.17087552
  0.93050000   2.17087376
  0.93050000   2.17087207
  0.93060000   2.17151396
  0.93060000   2.17150720
  0.93060000   2.17150105
  0.93060000   2.17149544
  0.93060000   2.17149029
  0.93060000   2.17148555
  0.93060000   2.17148118
  0.93060000   2.17147712
  0.93060000   2.17147335
  0.93060000   2.17146983
  0.93060000   2.17146655
  0.93060000   2.17146348
  0.93060000   2.17146059
  0.93060000   2.17145788
  0.93060000   2.17145532
  0.93060000   2.17145291
  0.93060000   2.17145063
  0.93060000   2.17144846
  0.93060000   2.17144641
  0.93060000   2.17144447
  0.93060000   2.17144262
  0.93060000   2.17144085
  0.93060000   2.17143917
  0.93070000   2.17207935
  0.93070000   2.17207260
  0.93070000   2.17206645
  0.93070000   2.17206084
  0.93070000   2.17205569
  0.93070000   2.17205096
  0.93070000   2.17204658
  0.93070000   2.17204252
  0.93070000   2.17203875
  0.93070000   2.17203524
  0.93070000   2.17203196
  0.93070000   2.17202888
  0.93070000   2.17202599
  0.93070000   2.17202328
  0.93070000   2.17202072
  0.93070000   2.17201831
  0.93070000   2.17201603
  0.93070000   2.17201387
  0.93070000   2.17201182
  0.93070000   2.17200987
  0.93070000   2.17200802
  0.93070000   2.17200625
  0.93070000   2.17200457
  0.93080000   2.17264306
  0.93080000   2.17263631
  0.93080000   2.17263016
  0.93080000   2.17262455
  0.93080000   2.17261941
  0.93080000   2.17261467
  0.93080000   2.17261029
  0.93080000   2.17260624
  0.93080000   2.17260247
  0.93080000   2.17259895
  0.93080000   2.17259567
  0.93080000   2.17259260
  0.93080000   2.17258971
  0.93080000   2.17258700
  0.93080000   2.17258444
  0.93080000   2.17258203
  0.93080000   2.17257974
  0.93080000   2.17257758
  0.93080000   2.17257553
  0.93080000   2.17257358
  0.93080000   2.17257173
  0.93080000   2.17256997
  0.93080000   2.17256829
  0.93090000   2.17320509
  0.93090000   2.17319834
  0.93090000   2.17319220
  0.93090000   2.17318659
  0.93090000   2.17318144
  0.93090000   2.17317671
  0.93090000   2.17317233
  0.93090000   2.17316828
  0.93090000   2.17316451
  0.93090000   2.17316099
  0.93090000   2.17315771
  0.93090000   2.17315464
  0.93090000   2.17315175
  0.93090000   2.17314904
  0.93090000   2.17314648
  0.93090000   2.17314406
  0.93090000   2.17314178
  0.93090000   2.17313962
  0.93090000   2.17313757
  0.93090000   2.17313562
  0.93090000   2.17313377
  0.93090000   2.17313200
  0.93090000   2.17313032
  0.93100000   2.17376546
  0.93100000   2.17375870
  0.93100000   2.17375256
  0.93100000   2.17374695
  0.93100000   2.17374181
  0.93100000   2.17373708
  0.93100000   2.17373270
  0.93100000   2.17372864
  0.93100000   2.17372488
  0.93100000   2.17372136
  0.93100000   2.17371808
  0.93100000   2.17371500
  0.93100000   2.17371212
  0.93100000   2.17370940
  0.93100000   2.17370685
  0.93100000   2.17370443
  0.93100000   2.17370215
  0.93100000   2.17369999
  0.93100000   2.17369794
  0.93100000   2.17369599
  0.93100000   2.17369414
  0.93100000   2.17369237
  0.93100000   2.17369069
  0.93110000   2.17432416
  0.93110000   2.17431740
  0.93110000   2.17431127
  0.93110000   2.17430566
  0.93110000   2.17430052
  0.93110000   2.17429578
  0.93110000   2.17429141
  0.93110000   2.17428735
  0.93110000   2.17428358
  0.93110000   2.17428007
  0.93110000   2.17427679
  0.93110000   2.17427371
  0.93110000   2.17427083
  0.93110000   2.17426811
  0.93110000   2.17426556
  0.93110000   2.17426314
  0.93110000   2.17426086
  0.93110000   2.17425870
  0.93110000   2.17425664
  0.93110000   2.17425470
  0.93110000   2.17425284
  0.93110000   2.17425108
  0.93110000   2.17424940
  0.93120000   2.17488121
  0.93120000   2.17487445
  0.93120000   2.17486832
  0.93120000   2.17486271
  0.93120000   2.17485757
  0.93120000   2.17485284
  0.93120000   2.17484846
  0.93120000   2.17484441
  0.93120000   2.17484064
  0.93120000   2.17483713
  0.93120000   2.17483384
  0.93120000   2.17483077
  0.93120000   2.17482788
  0.93120000   2.17482517
  0.93120000   2.17482261
  0.93120000   2.17482020
  0.93120000   2.17481791
  0.93120000   2.17481575
  0.93120000   2.17481370
  0.93120000   2.17481175
  0.93120000   2.17480990
  0.93120000   2.17480813
  0.93120000   2.17480645
  0.93130000   2.17543661
  0.93130000   2.17542986
  0.93130000   2.17542373
  0.93130000   2.17541812
  0.93130000   2.17541298
  0.93130000   2.17540825
  0.93130000   2.17540388
  0.93130000   2.17539982
  0.93130000   2.17539605
  0.93130000   2.17539254
  0.93130000   2.17538926
  0.93130000   2.17538618
  0.93130000   2.17538330
  0.93130000   2.17538058
  0.93130000   2.17537802
  0.93130000   2.17537561
  0.93130000   2.17537333
  0.93130000   2.17537116
  0.93130000   2.17536911
  0.93130000   2.17536716
  0.93130000   2.17536531
  0.93130000   2.17536355
  0.93130000   2.17536186
  0.93140000   2.17599038
  0.93140000   2.17598363
  0.93140000   2.17597750
  0.93140000   2.17597190
  0.93140000   2.17596676
  0.93140000   2.17596203
  0.93140000   2.17595765
  0.93140000   2.17595360
  0.93140000   2.17594983
  0.93140000   2.17594632
  0.93140000   2.17594304
  0.93140000   2.17593996
  0.93140000   2.17593708
  0.93140000   2.17593436
  0.93140000   2.17593180
  0.93140000   2.17592939
  0.93140000   2.17592710
  0.93140000   2.17592494
  0.93140000   2.17592289
  0.93140000   2.17592094
  0.93140000   2.17591909
  0.93140000   2.17591732
  0.93140000   2.17591564
  0.93150000   2.17654253
  0.93150000   2.17653578
  0.93150000   2.17652965
  0.93150000   2.17652405
  0.93150000   2.17651891
  0.93150000   2.17651418
  0.93150000   2.17650980
  0.93150000   2.17650575
  0.93150000   2.17650198
  0.93150000   2.17649847
  0.93150000   2.17649519
  0.93150000   2.17649211
  0.93150000   2.17648923
  0.93150000   2.17648651
  0.93150000   2.17648395
  0.93150000   2.17648154
  0.93150000   2.17647926
  0.93150000   2.17647709
  0.93150000   2.17647504
  0.93150000   2.17647309
  0.93150000   2.17647124
  0.93150000   2.17646947
  0.93150000   2.17646779
  0.93160000   2.17709305
  0.93160000   2.17708631
  0.93160000   2.17708018
  0.93160000   2.17707458
  0.93160000   2.17706944
  0.93160000   2.17706471
  0.93160000   2.17706034
  0.93160000   2.17705628
  0.93160000   2.17705252
  0.93160000   2.17704900
  0.93160000   2.17704572
  0.93160000   2.17704265
  0.93160000   2.17703976
  0.93160000   2.17703705
  0.93160000   2.17703449
  0.93160000   2.17703207
  0.93160000   2.17702979
  0.93160000   2.17702763
  0.93160000   2.17702557
  0.93160000   2.17702362
  0.93160000   2.17702177
  0.93160000   2.17702000
  0.93160000   2.17701832
  0.93170000   2.17764197
  0.93170000   2.17763522
  0.93170000   2.17762910
  0.93170000   2.17762350
  0.93170000   2.17761836
  0.93170000   2.17761363
  0.93170000   2.17760926
  0.93170000   2.17760521
  0.93170000   2.17760144
  0.93170000   2.17759793
  0.93170000   2.17759464
  0.93170000   2.17759157
  0.93170000   2.17758868
  0.93170000   2.17758597
  0.93170000   2.17758341
  0.93170000   2.17758100
  0.93170000   2.17757871
  0.93170000   2.17757655
  0.93170000   2.17757450
  0.93170000   2.17757255
  0.93170000   2.17757069
  0.93170000   2.17756893
  0.93170000   2.17756724
  0.93180000   2.17818928
  0.93180000   2.17818254
  0.93180000   2.17817642
  0.93180000   2.17817082
  0.93180000   2.17816568
  0.93180000   2.17816095
  0.93180000   2.17815658
  0.93180000   2.17815253
  0.93180000   2.17814876
  0.93180000   2.17814525
  0.93180000   2.17814197
  0.93180000   2.17813889
  0.93180000   2.17813601
  0.93180000   2.17813329
  0.93180000   2.17813073
  0.93180000   2.17812832
  0.93180000   2.17812604
  0.93180000   2.17812387
  0.93180000   2.17812182
  0.93180000   2.17811987
  0.93180000   2.17811802
  0.93180000   2.17811625
  0.93180000   2.17811457
  0.93190000   2.17873501
  0.93190000   2.17872826
  0.93190000   2.17872214
  0.93190000   2.17871654
  0.93190000   2.17871141
  0.93190000   2.17870668
  0.93190000   2.17870231
  0.93190000   2.17869826
  0.93190000   2.17869449
  0.93190000   2.17869098
  0.93190000   2.17868770
  0.93190000   2.17868462
  0.93190000   2.17868174
  0.93190000   2.17867902
  0.93190000   2.17867646
  0.93190000   2.17867405
  0.93190000   2.17867176
  0.93190000   2.17866960
  0.93190000   2.17866755
  0.93190000   2.17866560
  0.93190000   2.17866374
  0.93190000   2.17866198
  0.93190000   2.17866029
  0.93200000   2.17927914
  0.93200000   2.17927240
  0.93200000   2.17926628
  0.93200000   2.17926069
  0.93200000   2.17925555
  0.93200000   2.17925082
  0.93200000   2.17924645
  0.93200000   2.17924240
  0.93200000   2.17923864
  0.93200000   2.17923512
  0.93200000   2.17923184
  0.93200000   2.17922877
  0.93200000   2.17922588
  0.93200000   2.17922317
  0.93200000   2.17922061
  0.93200000   2.17921819
  0.93200000   2.17921591
  0.93200000   2.17921375
  0.93200000   2.17921169
  0.93200000   2.17920974
  0.93200000   2.17920789
  0.93200000   2.17920612
  0.93200000   2.17920444
  0.93210000   2.17982170
  0.93210000   2.17981496
  0.93210000   2.17980885
  0.93210000   2.17980325
  0.93210000   2.17979812
  0.93210000   2.17979339
  0.93210000   2.17978902
  0.93210000   2.17978497
  0.93210000   2.17978120
  0.93210000   2.17977769
  0.93210000   2.17977441
  0.93210000   2.17977133
  0.93210000   2.17976845
  0.93210000   2.17976573
  0.93210000   2.17976318
  0.93210000   2.17976076
  0.93210000   2.17975848
  0.93210000   2.17975631
  0.93210000   2.17975426
  0.93210000   2.17975231
  0.93210000   2.17975045
  0.93210000   2.17974869
  0.93210000   2.17974700
  0.93220000   2.18036269
  0.93220000   2.18035595
  0.93220000   2.18034984
  0.93220000   2.18034424
  0.93220000   2.18033911
  0.93220000   2.18033439
  0.93220000   2.18033002
  0.93220000   2.18032597
  0.93220000   2.18032220
  0.93220000   2.18031869
  0.93220000   2.18031541
  0.93220000   2.18031233
  0.93220000   2.18030945
  0.93220000   2.18030673
  0.93220000   2.18030417
  0.93220000   2.18030176
  0.93220000   2.18029947
  0.93220000   2.18029731
  0.93220000   2.18029526
  0.93220000   2.18029331
  0.93220000   2.18029145
  0.93220000   2.18028968
  0.93220000   2.18028800
  0.93230000   2.18090212
  0.93230000   2.18089538
  0.93230000   2.18088927
  0.93230000   2.18088368
  0.93230000   2.18087855
  0.93230000   2.18087382
  0.93230000   2.18086945
  0.93230000   2.18086540
  0.93230000   2.18086164
  0.93230000   2.18085813
  0.93230000   2.18085485
  0.93230000   2.18085177
  0.93230000   2.18084889
  0.93230000   2.18084617
  0.93230000   2.18084361
  0.93230000   2.18084120
  0.93230000   2.18083891
  0.93230000   2.18083675
  0.93230000   2.18083469
  0.93230000   2.18083274
  0.93230000   2.18083089
  0.93230000   2.18082912
  0.93230000   2.18082744
  0.93240000   2.18144000
  0.93240000   2.18143326
  0.93240000   2.18142715
  0.93240000   2.18142156
  0.93240000   2.18141643
  0.93240000   2.18141170
  0.93240000   2.18140734
  0.93240000   2.18140329
  0.93240000   2.18139952
  0.93240000   2.18139601
  0.93240000   2.18139273
  0.93240000   2.18138966
  0.93240000   2.18138677
  0.93240000   2.18138405
  0.93240000   2.18138150
  0.93240000   2.18137908
  0.93240000   2.18137680
  0.93240000   2.18137463
  0.93240000   2.18137258
  0.93240000   2.18137063
  0.93240000   2.18136877
  0.93240000   2.18136700
  0.93240000   2.18136532
  0.93250000   2.18197633
  0.93250000   2.18196959
  0.93250000   2.18196349
  0.93250000   2.18195789
  0.93250000   2.18195277
  0.93250000   2.18194804
  0.93250000   2.18194367
  0.93250000   2.18193962
  0.93250000   2.18193586
  0.93250000   2.18193235
  0.93250000   2.18192907
  0.93250000   2.18192599
  0.93250000   2.18192311
  0.93250000   2.18192039
  0.93250000   2.18191784
  0.93250000   2.18191542
  0.93250000   2.18191314
  0.93250000   2.18191097
  0.93250000   2.18190892
  0.93250000   2.18190697
  0.93250000   2.18190511
  0.93250000   2.18190334
  0.93250000   2.18190166
  0.93260000   2.18251113
  0.93260000   2.18250439
  0.93260000   2.18249828
  0.93260000   2.18249269
  0.93260000   2.18248757
  0.93260000   2.18248284
  0.93260000   2.18247847
  0.93260000   2.18247443
  0.93260000   2.18247066
  0.93260000   2.18246715
  0.93260000   2.18246387
  0.93260000   2.18246080
  0.93260000   2.18245791
  0.93260000   2.18245520
  0.93260000   2.18245264
  0.93260000   2.18245022
  0.93260000   2.18244794
  0.93260000   2.18244577
  0.93260000   2.18244372
  0.93260000   2.18244177
  0.93260000   2.18243991
  0.93260000   2.18243814
  0.93260000   2.18243646
  0.93270000   2.18304439
  0.93270000   2.18303765
  0.93270000   2.18303155
  0.93270000   2.18302596
  0.93270000   2.18302084
  0.93270000   2.18301611
  0.93270000   2.18301175
  0.93270000   2.18300770
  0.93270000   2.18300393
  0.93270000   2.18300042
  0.93270000   2.18299714
  0.93270000   2.18299407
  0.93270000   2.18299118
  0.93270000   2.18298847
  0.93270000   2.18298591
  0.93270000   2.18298349
  0.93270000   2.18298121
  0.93270000   2.18297904
  0.93270000   2.18297699
  0.93270000   2.18297504
  0.93270000   2.18297318
  0.93270000   2.18297142
  0.93270000   2.18296973
  0.93280000   2.18357614
  0.93280000   2.18356940
  0.93280000   2.18356330
  0.93280000   2.18355771
  0.93280000   2.18355258
  0.93280000   2.18354786
  0.93280000   2.18354349
  0.93280000   2.18353945
  0.93280000   2.18353568
  0.93280000   2.18353217
  0.93280000   2.18352889
  0.93280000   2.18352582
  0.93280000   2.18352293
  0.93280000   2.18352022
  0.93280000   2.18351766
  0.93280000   2.18351524
  0.93280000   2.18351296
  0.93280000   2.18351079
  0.93280000   2.18350874
  0.93280000   2.18350679
  0.93280000   2.18350493
  0.93280000   2.18350317
  0.93280000   2.18350148
  0.93290000   2.18410637
  0.93290000   2.18409962
  0.93290000   2.18409353
  0.93290000   2.18408794
  0.93290000   2.18408282
  0.93290000   2.18407809
  0.93290000   2.18407373
  0.93290000   2.18406968
  0.93290000   2.18406592
  0.93290000   2.18406241
  0.93290000   2.18405913
  0.93290000   2.18405606
  0.93290000   2.18405317
  0.93290000   2.18405046
  0.93290000   2.18404790
  0.93290000   2.18404548
  0.93290000   2.18404320
  0.93290000   2.18404103
  0.93290000   2.18403898
  0.93290000   2.18403703
  0.93290000   2.18403517
  0.93290000   2.18403340
  0.93290000   2.18403171
  0.93300000   2.18463509
  0.93300000   2.18462834
  0.93300000   2.18462225
  0.93300000   2.18461666
  0.93300000   2.18461154
  0.93300000   2.18460682
  0.93300000   2.18460246
  0.93300000   2.18459841
  0.93300000   2.18459465
  0.93300000   2.18459114
  0.93300000   2.18458786
  0.93300000   2.18458479
  0.93300000   2.18458190
  0.93300000   2.18457919
  0.93300000   2.18457663
  0.93300000   2.18457421
  0.93300000   2.18457193
  0.93300000   2.18456976
  0.93300000   2.18456771
  0.93300000   2.18456575
  0.93300000   2.18456390
  0.93300000   2.18456213
  0.93300000   2.18456044
  0.93310000   2.18516231
  0.93310000   2.18515557
  0.93310000   2.18514948
  0.93310000   2.18514389
  0.93310000   2.18513877
  0.93310000   2.18513405
  0.93310000   2.18512969
  0.93310000   2.18512564
  0.93310000   2.18512188
  0.93310000   2.18511837
  0.93310000   2.18511509
  0.93310000   2.18511202
  0.93310000   2.18510913
  0.93310000   2.18510642
  0.93310000   2.18510386
  0.93310000   2.18510144
  0.93310000   2.18509916
  0.93310000   2.18509699
  0.93310000   2.18509494
  0.93310000   2.18509299
  0.93310000   2.18509113
  0.93310000   2.18508936
  0.93310000   2.18508767
  0.93320000   2.18568805
  0.93320000   2.18568130
  0.93320000   2.18567521
  0.93320000   2.18566962
  0.93320000   2.18566451
  0.93320000   2.18565979
  0.93320000   2.18565542
  0.93320000   2.18565138
  0.93320000   2.18564762
  0.93320000   2.18564411
  0.93320000   2.18564083
  0.93320000   2.18563775
  0.93320000   2.18563487
  0.93320000   2.18563215
  0.93320000   2.18562960
  0.93320000   2.18562718
  0.93320000   2.18562489
  0.93320000   2.18562273
  0.93320000   2.18562067
  0.93320000   2.18561872
  0.93320000   2.18561687
  0.93320000   2.18561510
  0.93320000   2.18561341
  0.93330000   2.18621229
  0.93330000   2.18620554
  0.93330000   2.18619946
  0.93330000   2.18619388
  0.93330000   2.18618876
  0.93330000   2.18618404
  0.93330000   2.18617968
  0.93330000   2.18617563
  0.93330000   2.18617187
  0.93330000   2.18616836
  0.93330000   2.18616508
  0.93330000   2.18616201
  0.93330000   2.18615912
  0.93330000   2.18615641
  0.93330000   2.18615385
  0.93330000   2.18615143
  0.93330000   2.18614915
  0.93330000   2.18614698
  0.93330000   2.18614493
  0.93330000   2.18614298
  0.93330000   2.18614112
  0.93330000   2.18613935
  0.93330000   2.18613767
  0.93340000   2.18673506
  0.93340000   2.18672831
  0.93340000   2.18672224
  0.93340000   2.18671665
  0.93340000   2.18671153
  0.93340000   2.18670681
  0.93340000   2.18670245
  0.93340000   2.18669841
  0.93340000   2.18669465
  0.93340000   2.18669114
  0.93340000   2.18668786
  0.93340000   2.18668479
  0.93340000   2.18668190
  0.93340000   2.18667919
  0.93340000   2.18667663
  0.93340000   2.18667421
  0.93340000   2.18667193
  0.93340000   2.18666976
  0.93340000   2.18666771
  0.93340000   2.18666576
  0.93340000   2.18666390
  0.93340000   2.18666213
  0.93340000   2.18666044
  0.93350000   2.18725637
  0.93350000   2.18724961
  0.93350000   2.18724354
  0.93350000   2.18723795
  0.93350000   2.18723284
  0.93350000   2.18722812
  0.93350000   2.18722376
  0.93350000   2.18721972
  0.93350000   2.18721595
  0.93350000   2.18721245
  0.93350000   2.18720917
  0.93350000   2.18720610
  0.93350000   2.18720321
  0.93350000   2.18720050
  0.93350000   2.18719794
  0.93350000   2.18719552
  0.93350000   2.18719324
  0.93350000   2.18719107
  0.93350000   2.18718902
  0.93350000   2.18718706
  0.93350000   2.18718521
  0.93350000   2.18718344
  0.93350000   2.18718175
  0.93360000   2.18777621
  0.93360000   2.18776945
  0.93360000   2.18776338
  0.93360000   2.18775779
  0.93360000   2.18775268
  0.93360000   2.18774796
  0.93360000   2.18774361
  0.93360000   2.18773956
  0.93360000   2.18773580
  0.93360000   2.18773229
  0.93360000   2.18772901
  0.93360000   2.18772594
  0.93360000   2.18772306
  0.93360000   2.18772034
  0.93360000   2.18771778
  0.93360000   2.18771537
  0.93360000   2.18771308
  0.93360000   2.18771092
  0.93360000   2.18770886
  0.93360000   2.18770691
  0.93360000   2.18770505
  0.93360000   2.18770329
  0.93360000   2.18770160
  0.93370000   2.18829459
  0.93370000   2.18828783
  0.93370000   2.18828177
  0.93370000   2.18827618
  0.93370000   2.18827107
  0.93370000   2.18826635
  0.93370000   2.18826200
  0.93370000   2.18825795
  0.93370000   2.18825419
  0.93370000   2.18825068
  0.93370000   2.18824741
  0.93370000   2.18824433
  0.93370000   2.18824145
  0.93370000   2.18823873
  0.93370000   2.18823618
  0.93370000   2.18823376
  0.93370000   2.18823147
  0.93370000   2.18822931
  0.93370000   2.18822725
  0.93370000   2.18822530
  0.93370000   2.18822344
  0.93370000   2.18822168
  0.93370000   2.18821999
  0.93380000   2.18881153
  0.93380000   2.18880477
  0.93380000   2.18879871
  0.93380000   2.18879312
  0.93380000   2.18878801
  0.93380000   2.18878329
  0.93380000   2.18877894
  0.93380000   2.18877489
  0.93380000   2.18877113
  0.93380000   2.18876763
  0.93380000   2.18876435
  0.93380000   2.18876128
  0.93380000   2.18875839
  0.93380000   2.18875568
  0.93380000   2.18875312
  0.93380000   2.18875070
  0.93380000   2.18874842
  0.93380000   2.18874625
  0.93380000   2.18874420
  0.93380000   2.18874225
  0.93380000   2.18874039
  0.93380000   2.18873862
  0.93380000   2.18873693
  0.93390000   2.18932703
  0.93390000   2.18932026
  0.93390000   2.18931421
  0.93390000   2.18930862
  0.93390000   2.18930351
  0.93390000   2.18929880
  0.93390000   2.18929444
  0.93390000   2.18929040
  0.93390000   2.18928664
  0.93390000   2.18928313
  0.93390000   2.18927985
  0.93390000   2.18927678
  0.93390000   2.18927390
  0.93390000   2.18927118
  0.93390000   2.18926862
  0.93390000   2.18926621
  0.93390000   2.18926392
  0.93390000   2.18926176
  0.93390000   2.18925970
  0.93390000   2.18925775
  0.93390000   2.18925589
  0.93390000   2.18925412
  0.93390000   2.18925244
  0.93400000   2.18984109
  0.93400000   2.18983432
  0.93400000   2.18982827
  0.93400000   2.18982268
  0.93400000   2.18981758
  0.93400000   2.18981286
  0.93400000   2.18980851
  0.93400000   2.18980447
  0.93400000   2.18980071
  0.93400000   2.18979720
  0.93400000   2.18979392
  0.93400000   2.18979085
  0.93400000   2.18978797
  0.93400000   2.18978525
  0.93400000   2.18978269
  0.93400000   2.18978028
  0.93400000   2.18977799
  0.93400000   2.18977583
  0.93400000   2.18977377
  0.93400000   2.18977182
  0.93400000   2.18976996
  0.93400000   2.18976819
  0.93400000   2.18976651
  0.93410000   2.19035373
  0.93410000   2.19034696
  0.93410000   2.19034091
  0.93410000   2.19033532
  0.93410000   2.19033022
  0.93410000   2.19032550
  0.93410000   2.19032115
  0.93410000   2.19031711
  0.93410000   2.19031335
  0.93410000   2.19030984
  0.93410000   2.19030657
  0.93410000   2.19030349
  0.93410000   2.19030061
  0.93410000   2.19029790
  0.93410000   2.19029534
  0.93410000   2.19029292
  0.93410000   2.19029064
  0.93410000   2.19028847
  0.93410000   2.19028642
  0.93410000   2.19028446
  0.93410000   2.19028261
  0.93410000   2.19028084
  0.93410000   2.19027915
  0.93420000   2.19086495
  0.93420000   2.19085817
  0.93420000   2.19085213
  0.93420000   2.19084654
  0.93420000   2.19084144
  0.93420000   2.19083672
  0.93420000   2.19083237
  0.93420000   2.19082833
  0.93420000   2.19082457
  0.93420000   2.19082107
  0.93420000   2.19081779
  0.93420000   2.19081472
  0.93420000   2.19081183
  0.93420000   2.19080912
  0.93420000   2.19080656
  0.93420000   2.19080415
  0.93420000   2.19080186
  0.93420000   2.19079969
  0.93420000   2.19079764
  0.93420000   2.19079569
  0.93420000   2.19079383
  0.93420000   2.19079206
  0.93420000   2.19079037
  0.93430000   2.19137475
  0.93430000   2.19136797
  0.93430000   2.19136194
  0.93430000   2.19135635
  0.93430000   2.19135125
  0.93430000   2.19134653
  0.93430000   2.19134218
  0.93430000   2.19133814
  0.93430000   2.19133438
  0.93430000   2.19133088
  0.93430000   2.19132760
  0.93430000   2.19132453
  0.93430000   2.19132165
  0.93430000   2.19131893
  0.93430000   2.19131637
  0.93430000   2.19131396
  0.93430000   2.19131167
  0.93430000   2.19130951
  0.93430000   2.19130745
  0.93430000   2.19130550
  0.93430000   2.19130364
  0.93430000   2.19130187
  0.93430000   2.19130018
  0.93440000   2.19188315
  0.93440000   2.19187637
  0.93440000   2.19187034
  0.93440000   2.19186475
  0.93440000   2.19185965
  0.93440000   2.19185494
  0.93440000   2.19185059
  0.93440000   2.19184655
  0.93440000   2.19184279
  0.93440000   2.19183928
  0.93440000   2.19183601
  0.93440000   2.19183294
  0.93440000   2.19183005
  0.93440000   2.19182734
  0.93440000   2.19182478
  0.93440000   2.19182236
  0.93440000   2.19182008
  0.93440000   2.19181791
  0.93440000   2.19181586
  0.93440000   2.19181391
  0.93440000   2.19181205
  0.93440000   2.19181028
  0.93440000   2.19180859
  0.93450000   2.19239015
  0.93450000   2.19238337
  0.93450000   2.19237734
  0.93450000   2.19237175
  0.93450000   2.19236666
  0.93450000   2.19236194
  0.93450000   2.19235759
  0.93450000   2.19235355
  0.93450000   2.19234980
  0.93450000   2.19234629
  0.93450000   2.19234302
  0.93450000   2.19233994
  0.93450000   2.19233706
  0.93450000   2.19233435
  0.93450000   2.19233179
  0.93450000   2.19232937
  0.93450000   2.19232709
  0.93450000   2.19232492
  0.93450000   2.19232287
  0.93450000   2.19232092
  0.93450000   2.19231906
  0.93450000   2.19231729
  0.93450000   2.19231560
  0.93460000   2.19289576
  0.93460000   2.19288898
  0.93460000   2.19288295
  0.93460000   2.19287736
  0.93460000   2.19287227
  0.93460000   2.19286756
  0.93460000   2.19286321
  0.93460000   2.19285917
  0.93460000   2.19285541
  0.93460000   2.19285191
  0.93460000   2.19284863
  0.93460000   2.19284556
  0.93460000   2.19284268
  0.93460000   2.19283996
  0.93460000   2.19283741
  0.93460000   2.19283499
  0.93460000   2.19283270
  0.93460000   2.19283054
  0.93460000   2.19282848
  0.93460000   2.19282653
  0.93460000   2.19282467
  0.93460000   2.19282290
  0.93460000   2.19282122
  0.93470000   2.19339998
  0.93470000   2.19339320
  0.93470000   2.19338718
  0.93470000   2.19338159
  0.93470000   2.19337650
  0.93470000   2.19337178
  0.93470000   2.19336744
  0.93470000   2.19336340
  0.93470000   2.19335964
  0.93470000   2.19335614
  0.93470000   2.19335286
  0.93470000   2.19334979
  0.93470000   2.19334691
  0.93470000   2.19334419
  0.93470000   2.19334164
  0.93470000   2.19333922
  0.93470000   2.19333694
  0.93470000   2.19333477
  0.93470000   2.19333271
  0.93470000   2.19333076
  0.93470000   2.19332890
  0.93470000   2.19332713
  0.93470000   2.19332545
  0.93480000   2.19390282
  0.93480000   2.19389604
  0.93480000   2.19389002
  0.93480000   2.19388444
  0.93480000   2.19387935
  0.93480000   2.19387463
  0.93480000   2.19387029
  0.93480000   2.19386625
  0.93480000   2.19386249
  0.93480000   2.19385899
  0.93480000   2.19385571
  0.93480000   2.19385264
  0.93480000   2.19384976
  0.93480000   2.19384705
  0.93480000   2.19384449
  0.93480000   2.19384207
  0.93480000   2.19383979
  0.93480000   2.19383762
  0.93480000   2.19383557
  0.93480000   2.19383362
  0.93480000   2.19383176
  0.93480000   2.19382999
  0.93480000   2.19382830
  0.93490000   2.19440429
  0.93490000   2.19439752
  0.93490000   2.19439150
  0.93490000   2.19438591
  0.93490000   2.19438082
  0.93490000   2.19437611
  0.93490000   2.19437176
  0.93490000   2.19436773
  0.93490000   2.19436397
  0.93490000   2.19436047
  0.93490000   2.19435719
  0.93490000   2.19435412
  0.93490000   2.19435124
  0.93490000   2.19434853
  0.93490000   2.19434597
  0.93490000   2.19434356
  0.93490000   2.19434127
  0.93490000   2.19433910
  0.93490000   2.19433705
  0.93490000   2.19433510
  0.93490000   2.19433324
  0.93490000   2.19433147
  0.93490000   2.19432978
  0.93500000   2.19490440
  0.93500000   2.19489763
  0.93500000   2.19489161
  0.93500000   2.19488602
  0.93500000   2.19488094
  0.93500000   2.19487622
  0.93500000   2.19487188
  0.93500000   2.19486784
  0.93500000   2.19486409
  0.93500000   2.19486058
  0.93500000   2.19485731
  0.93500000   2.19485424
  0.93500000   2.19485136
  0.93500000   2.19484864
  0.93500000   2.19484609
  0.93500000   2.19484367
  0.93500000   2.19484139
  0.93500000   2.19483922
  0.93500000   2.19483717
  0.93500000   2.19483521
  0.93500000   2.19483336
  0.93500000   2.19483159
  0.93500000   2.19482990
  0.93510000   2.19540314
  0.93510000   2.19539638
  0.93510000   2.19539036
  0.93510000   2.19538478
  0.93510000   2.19537969
  0.93510000   2.19537498
  0.93510000   2.19537063
  0.93510000   2.19536660
  0.93510000   2.19536284
  0.93510000   2.19535934
  0.93510000   2.19535607
  0.93510000   2.19535300
  0.93510000   2.19535012
  0.93510000   2.19534740
  0.93510000   2.19534485
  0.93510000   2.19534243
  0.93510000   2.19534014
  0.93510000   2.19533798
  0.93510000   2.19533592
  0.93510000   2.19533397
  0.93510000   2.19533211
  0.93510000   2.19533034
  0.93510000   2.19532865
  0.93520000   2.19590053
  0.93520000   2.19589378
  0.93520000   2.19588776
  0.93520000   2.19588218
  0.93520000   2.19587709
  0.93520000   2.19587238
  0.93520000   2.19586804
  0.93520000   2.19586400
  0.93520000   2.19586025
  0.93520000   2.19585675
  0.93520000   2.19585347
  0.93520000   2.19585040
  0.93520000   2.19584752
  0.93520000   2.19584481
  0.93520000   2.19584225
  0.93520000   2.19583984
  0.93520000   2.19583755
  0.93520000   2.19583539
  0.93520000   2.19583333
  0.93520000   2.19583138
  0.93520000   2.19582952
  0.93520000   2.19582775
  0.93520000   2.19582606
  0.93530000   2.19639657
  0.93530000   2.19638983
  0.93530000   2.19638381
  0.93530000   2.19637823
  0.93530000   2.19637315
  0.93530000   2.19636844
  0.93530000   2.19636410
  0.93530000   2.19636006
  0.93530000   2.19635631
  0.93530000   2.19635281
  0.93530000   2.19634953
  0.93530000   2.19634646
  0.93530000   2.19634358
  0.93530000   2.19634087
  0.93530000   2.19633831
  0.93530000   2.19633590
  0.93530000   2.19633361
  0.93530000   2.19633145
  0.93530000   2.19632939
  0.93530000   2.19632744
  0.93530000   2.19632558
  0.93530000   2.19632381
  0.93530000   2.19632212
  0.93540000   2.19689127
  0.93540000   2.19688455
  0.93540000   2.19687852
  0.93540000   2.19687295
  0.93540000   2.19686786
  0.93540000   2.19686316
  0.93540000   2.19685881
  0.93540000   2.19685478
  0.93540000   2.19685103
  0.93540000   2.19684753
  0.93540000   2.19684425
  0.93540000   2.19684119
  0.93540000   2.19683830
  0.93540000   2.19683559
  0.93540000   2.19683303
  0.93540000   2.19683062
  0.93540000   2.19682833
  0.93540000   2.19682617
  0.93540000   2.19682411
  0.93540000   2.19682216
  0.93540000   2.19682030
  0.93540000   2.19681853
  0.93540000   2.19681684
  0.93550000   2.19738464
  0.93550000   2.19737794
  0.93550000   2.19737190
  0.93550000   2.19736634
  0.93550000   2.19736125
  0.93550000   2.19735655
  0.93550000   2.19735220
  0.93550000   2.19734817
  0.93550000   2.19734442
  0.93550000   2.19734092
  0.93550000   2.19733764
  0.93550000   2.19733457
  0.93550000   2.19733169
  0.93550000   2.19732898
  0.93550000   2.19732642
  0.93550000   2.19732401
  0.93550000   2.19732172
  0.93550000   2.19731956
  0.93550000   2.19731750
  0.93550000   2.19731555
  0.93550000   2.19731369
  0.93550000   2.19731192
  0.93550000   2.19731023
  0.93560000   2.19787667
  0.93560000   2.19787000
  0.93560000   2.19786395
  0.93560000   2.19785840
  0.93560000   2.19785331
  0.93560000   2.19784861
  0.93560000   2.19784426
  0.93560000   2.19784023
  0.93560000   2.19783648
  0.93560000   2.19783298
  0.93560000   2.19782971
  0.93560000   2.19782664
  0.93560000   2.19782376
  0.93560000   2.19782104
  0.93560000   2.19781849
  0.93560000   2.19781607
  0.93560000   2.19781379
  0.93560000   2.19781162
  0.93560000   2.19780957
  0.93560000   2.19780761
  0.93560000   2.19780576
  0.93560000   2.19780399
  0.93560000   2.19780230
  0.93570000   2.19836738
  0.93570000   2.19836075
  0.93570000   2.19835468
  0.93570000   2.19834914
  0.93570000   2.19834404
  0.93570000   2.19833935
  0.93570000   2.19833500
  0.93570000   2.19833097
  0.93570000   2.19832722
  0.93570000   2.19832372
  0.93570000   2.19832045
  0.93570000   2.19831738
  0.93570000   2.19831450
  0.93570000   2.19831179
  0.93570000   2.19830923
  0.93570000   2.19830682
  0.93570000   2.19830453
  0.93570000   2.19830237
  0.93570000   2.19830031
  0.93570000   2.19829836
  0.93570000   2.19829650
  0.93570000   2.19829473
  0.93570000   2.19829304
  0.93580000   2.19885678
  0.93580000   2.19885019
  0.93580000   2.19884410
  0.93580000   2.19883857
  0.93580000   2.19883347
  0.93580000   2.19882878
  0.93580000   2.19882443
  0.93580000   2.19882040
  0.93580000   2.19881665
  0.93580000   2.19881315
  0.93580000   2.19880988
  0.93580000   2.19880681
  0.93580000   2.19880393
  0.93580000   2.19880122
  0.93580000   2.19879866
  0.93580000   2.19879625
  0.93580000   2.19879396
  0.93580000   2.19879180
  0.93580000   2.19878974
  0.93580000   2.19878779
  0.93580000   2.19878593
  0.93580000   2.19878416
  0.93580000   2.19878247
  0.93590000   2.19934486
  0.93590000   2.19933832
  0.93590000   2.19933220
  0.93590000   2.19932669
  0.93590000   2.19932158
  0.93590000   2.19931690
  0.93590000   2.19931255
  0.93590000   2.19930852
  0.93590000   2.19930477
  0.93590000   2.19930127
  0.93590000   2.19929800
  0.93590000   2.19929493
  0.93590000   2.19929205
  0.93590000   2.19928934
  0.93590000   2.19928679
  0.93590000   2.19928437
  0.93590000   2.19928209
  0.93590000   2.19927992
  0.93590000   2.19927787
  0.93590000   2.19927591
  0.93590000   2.19927406
  0.93590000   2.19927229
  0.93590000   2.19927060
  0.93600000   2.19983163
  0.93600000   2.19982515
  0.93600000   2.19981901
  0.93600000   2.19981352
  0.93600000   2.19980840
  0.93600000   2.19980372
  0.93600000   2.19979937
  0.93600000   2.19979534
  0.93600000   2.19979159
  0.93600000   2.19978809
  0.93600000   2.19978482
  0.93600000   2.19978176
  0.93600000   2.19977888
  0.93600000   2.19977616
  0.93600000   2.19977361
  0.93600000   2.19977119
  0.93600000   2.19976891
  0.93600000   2.19976674
  0.93600000   2.19976469
  0.93600000   2.19976274
  0.93600000   2.19976088
  0.93600000   2.19975911
  0.93600000   2.19975742
  0.93610000   2.20031710
  0.93610000   2.20031070
  0.93610000   2.20030451
  0.93610000   2.20029905
  0.93610000   2.20029391
  0.93610000   2.20028925
  0.93610000   2.20028489
  0.93610000   2.20028087
  0.93610000   2.20027712
  0.93610000   2.20027362
  0.93610000   2.20027035
  0.93610000   2.20026728
  0.93610000   2.20026440
  0.93610000   2.20026169
  0.93610000   2.20025914
  0.93610000   2.20025672
  0.93610000   2.20025444
  0.93610000   2.20025227
  0.93610000   2.20025022
  0.93610000   2.20024827
  0.93610000   2.20024641
  0.93610000   2.20024464
  0.93610000   2.20024295
  0.93620000   2.20080128
  0.93620000   2.20079496
  0.93620000   2.20078872
  0.93620000   2.20078329
  0.93620000   2.20077814
  0.93620000   2.20077348
  0.93620000   2.20076913
  0.93620000   2.20076511
  0.93620000   2.20076135
  0.93620000   2.20075786
  0.93620000   2.20075459
  0.93620000   2.20075152
  0.93620000   2.20074864
  0.93620000   2.20074593
  0.93620000   2.20074338
  0.93620000   2.20074096
  0.93620000   2.20073868
  0.93620000   2.20073651
  0.93620000   2.20073446
  0.93620000   2.20073250
  0.93620000   2.20073065
  0.93620000   2.20072888
  0.93620000   2.20072719
  0.93630000   2.20128416
  0.93630000   2.20127794
  0.93630000   2.20127165
  0.93630000   2.20126625
  0.93630000   2.20126109
  0.93630000   2.20125644
  0.93630000   2.20125208
  0.93630000   2.20124806
  0.93630000   2.20124431
  0.93630000   2.20124082
  0.93630000   2.20123754
  0.93630000   2.20123448
  0.93630000   2.20123160
  0.93630000   2.20122889
  0.93630000   2.20122633
  0.93630000   2.20122392
  0.93630000   2.20122163
  0.93630000   2.20121947
  0.93630000   2.20121741
  0.93630000   2.20121546
  0.93630000   2.20121360
  0.93630000   2.20121183
  0.93630000   2.20121015
  0.93640000   2.20176576
  0.93640000   2.20175966
  0.93640000   2.20175330
  0.93640000   2.20174794
  0.93640000   2.20174276
  0.93640000   2.20173812
  0.93640000   2.20173375
  0.93640000   2.20172974
  0.93640000   2.20172598
  0.93640000   2.20172249
  0.93640000   2.20171922
  0.93640000   2.20171616
  0.93640000   2.20171328
  0.93640000   2.20171057
  0.93640000   2.20170801
  0.93640000   2.20170560
  0.93640000   2.20170331
  0.93640000   2.20170115
  0.93640000   2.20169910
  0.93640000   2.20169714
  0.93640000   2.20169528
  0.93640000   2.20169351
  0.93640000   2.20169183
  0.93650000   2.20224607
  0.93650000   2.20224011
  0.93650000   2.20223367
  0.93650000   2.20222836
  0.93650000   2.20222315
  0.93650000   2.20221853
  0.93650000   2.20221415
  0.93650000   2.20221015
  0.93650000   2.20220639
  0.93650000   2.20220290
  0.93650000   2.20219963
  0.93650000   2.20219657
  0.93650000   2.20219369
  0.93650000   2.20219098
  0.93650000   2.20218842
  0.93650000   2.20218601
  0.93650000   2.20218372
  0.93650000   2.20218156
  0.93650000   2.20217951
  0.93650000   2.20217755
  0.93650000   2.20217570
  0.93650000   2.20217393
  0.93650000   2.20217224
  0.93660000   2.20272511
  0.93660000   2.20271930
  0.93660000   2.20271278
  0.93660000   2.20270752
  0.93660000   2.20270228
  0.93660000   2.20269768
  0.93660000   2.20269329
  0.93660000   2.20268930
  0.93660000   2.20268553
  0.93660000   2.20268205
  0.93660000   2.20267877
  0.93660000   2.20267571
  0.93660000   2.20267283
  0.93660000   2.20267012
  0.93660000   2.20266757
  0.93660000   2.20266515
  0.93660000   2.20266287
  0.93660000   2.20266071
  0.93660000   2.20265865
  0.93660000   2.20265670
  0.93660000   2.20265484
  0.93660000   2.20265307
  0.93660000   2.20265138
  0.93670000   2.20320287
  0.93670000   2.20319725
  0.93670000   2.20319062
  0.93670000   2.20318543
  0.93670000   2.20318015
  0.93670000   2.20317557
  0.93670000   2.20317117
  0.93670000   2.20316719
  0.93670000   2.20316342
  0.93670000   2.20315994
  0.93670000   2.20315666
  0.93670000   2.20315360
  0.93670000   2.20315072
  0.93670000   2.20314801
  0.93670000   2.20314546
  0.93670000   2.20314304
  0.93670000   2.20314076
  0.93670000   2.20313859
  0.93670000   2.20313654
  0.93670000   2.20313459
  0.93670000   2.20313273
  0.93670000   2.20313096
  0.93670000   2.20312927
  0.93680000   2.20367936
  0.93680000   2.20367395
  0.93680000   2.20366720
  0.93680000   2.20366208
  0.93680000   2.20365676
  0.93680000   2.20365221
  0.93680000   2.20364780
  0.93680000   2.20364382
  0.93680000   2.20364005
  0.93680000   2.20363657
  0.93680000   2.20363329
  0.93680000   2.20363023
  0.93680000   2.20362735
  0.93680000   2.20362465
  0.93680000   2.20362209
  0.93680000   2.20361968
  0.93680000   2.20361739
  0.93680000   2.20361523
  0.93680000   2.20361317
  0.93680000   2.20361122
  0.93680000   2.20360937
  0.93680000   2.20360759
  0.93680000   2.20360591
  0.93690000   2.20415459
  0.93690000   2.20414942
  0.93690000   2.20414252
  0.93690000   2.20413749
  0.93690000   2.20413212
  0.93690000   2.20412761
  0.93690000   2.20412317
  0.93690000   2.20411921
  0.93690000   2.20411543
  0.93690000   2.20411196
  0.93690000   2.20410868
  0.93690000   2.20410562
  0.93690000   2.20410274
  0.93690000   2.20410003
  0.93690000   2.20409748
  0.93690000   2.20409507
  0.93690000   2.20409278
  0.93690000   2.20409062
  0.93690000   2.20408856
  0.93690000   2.20408661
  0.93690000   2.20408475
  0.93690000   2.20408298
  0.93690000   2.20408129
  0.93700000   2.20462855
  0.93700000   2.20462366
  0.93700000   2.20461660
  0.93700000   2.20461167
  0.93700000   2.20460624
  0.93700000   2.20460177
  0.93700000   2.20459731
  0.93700000   2.20459336
  0.93700000   2.20458957
  0.93700000   2.20458611
  0.93700000   2.20458282
  0.93700000   2.20457977
  0.93700000   2.20457689
  0.93700000   2.20457418
  0.93700000   2.20457162
  0.93700000   2.20456921
  0.93700000   2.20456693
  0.93700000   2.20456476
  0.93700000   2.20456271
  0.93700000   2.20456076
  0.93700000   2.20455890
  0.93700000   2.20455713
  0.93700000   2.20455544
  0.93710000   2.20510126
  0.93710000   2.20509668
  0.93710000   2.20508943
  0.93710000   2.20508462
  0.93710000   2.20507912
  0.93710000   2.20507469
  0.93710000   2.20507021
  0.93710000   2.20506627
  0.93710000   2.20506248
  0.93710000   2.20505902
  0.93710000   2.20505573
  0.93710000   2.20505268
  0.93710000   2.20504980
  0.93710000   2.20504709
  0.93710000   2.20504454
  0.93710000   2.20504212
  0.93710000   2.20503984
  0.93710000   2.20503768
  0.93710000   2.20503562
  0.93710000   2.20503367
  0.93710000   2.20503181
  0.93710000   2.20503004
  0.93710000   2.20502836
  0.93720000   2.20557271
  0.93720000   2.20556848
  0.93720000   2.20556103
  0.93720000   2.20555635
  0.93720000   2.20555077
  0.93720000   2.20554639
  0.93720000   2.20554188
  0.93720000   2.20553796
  0.93720000   2.20553416
  0.93720000   2.20553070
  0.93720000   2.20552741
  0.93720000   2.20552436
  0.93720000   2.20552148
  0.93720000   2.20551878
  0.93720000   2.20551622
  0.93720000   2.20551381
  0.93720000   2.20551152
  0.93720000   2.20550936
  0.93720000   2.20550731
  0.93720000   2.20550536
  0.93720000   2.20550350
  0.93720000   2.20550173
  0.93720000   2.20550004
  0.93730000   2.20604291
  0.93730000   2.20603909
  0.93730000   2.20603138
  0.93730000   2.20602686
  0.93730000   2.20602119
  0.93730000   2.20601686
  0.93730000   2.20601232
  0.93730000   2.20600843
  0.93730000   2.20600461
  0.93730000   2.20600116
  0.93730000   2.20599787
  0.93730000   2.20599482
  0.93730000   2.20599194
  0.93730000   2.20598923
  0.93730000   2.20598668
  0.93730000   2.20598427
  0.93730000   2.20598198
  0.93730000   2.20597982
  0.93730000   2.20597777
  0.93730000   2.20597581
  0.93730000   2.20597396
  0.93730000   2.20597219
  0.93730000   2.20597050
  0.93740000   2.20651186
  0.93740000   2.20650849
  0.93740000   2.20650051
  0.93740000   2.20649616
  0.93740000   2.20649038
  0.93740000   2.20648613
  0.93740000   2.20648154
  0.93740000   2.20647767
  0.93740000   2.20647384
  0.93740000   2.20647041
  0.93740000   2.20646711
  0.93740000   2.20646407
  0.93740000   2.20646118
  0.93740000   2.20645848
  0.93740000   2.20645592
  0.93740000   2.20645351
  0.93740000   2.20645122
  0.93740000   2.20644906
  0.93740000   2.20644701
  0.93740000   2.20644506
  0.93740000   2.20644320
  0.93740000   2.20644143
  0.93740000   2.20643974
  0.93750000   2.20697956
  0.93750000   2.20697671
  0.93750000   2.20696841
  0.93750000   2.20696426
  0.93750000   2.20695836
  0.93750000   2.20695418
  0.93750000   2.20694955
  0.93750000   2.20694571
  0.93750000   2.20694186
  0.93750000   2.20693844
  0.93750000   2.20693513
  0.93750000   2.20693209
  0.93750000   2.20692920
  0.93750000   2.20692651
  0.93750000   2.20692395
  0.93750000   2.20692154
  0.93750000   2.20691925
  0.93750000   2.20691709
  0.93750000   2.20691504
  0.93750000   2.20691309
  0.93750000   2.20691123
  0.93750000   2.20690946
  0.93750000   2.20690777
  0.93760000   2.20744601
  0.93760000   2.20744374
  0.93760000   2.20743508
  0.93760000   2.20743116
  0.93760000   2.20742512
  0.93760000   2.20742103
  0.93760000   2.20741635
  0.93760000   2.20741254
  0.93760000   2.20740867
  0.93760000   2.20740526
  0.93760000   2.20740195
  0.93760000   2.20739892
  0.93760000   2.20739603
  0.93760000   2.20739333
  0.93760000   2.20739077
  0.93760000   2.20738836
  0.93760000   2.20738608
  0.93760000   2.20738391
  0.93760000   2.20738186
  0.93760000   2.20737991
  0.93760000   2.20737805
  0.93760000   2.20737628
  0.93760000   2.20737459
  0.93770000   2.20791122
  0.93770000   2.20790960
  0.93770000   2.20790054
  0.93770000   2.20789688
  0.93770000   2.20789067
  0.93770000   2.20788669
  0.93770000   2.20788194
  0.93770000   2.20787818
  0.93770000   2.20787428
  0.93770000   2.20787089
  0.93770000   2.20786757
  0.93770000   2.20786454
  0.93770000   2.20786165
  0.93770000   2.20785895
  0.93770000   2.20785639
  0.93770000   2.20785398
  0.93770000   2.20785170
  0.93770000   2.20784954
  0.93770000   2.20784748
  0.93770000   2.20784553
  0.93770000   2.20784368
  0.93770000   2.20784191
  0.93770000   2.20784022
  0.93780000   2.20837519
  0.93780000   2.20837430
  0.93780000   2.20836477
  0.93780000   2.20836141
  0.93780000   2.20835502
  0.93780000   2.20835115
  0.93780000   2.20834633
  0.93780000   2.20834262
  0.93780000   2.20833870
  0.93780000   2.20833532
  0.93780000   2.20833199
  0.93780000   2.20832897
  0.93780000   2.20832607
  0.93780000   2.20832338
  0.93780000   2.20832082
  0.93780000   2.20831841
  0.93780000   2.20831612
  0.93780000   2.20831396
  0.93780000   2.20831191
  0.93780000   2.20830996
  0.93780000   2.20830810
  0.93780000   2.20830633
  0.93780000   2.20830465
  0.93790000   2.20883791
  0.93790000   2.20883785
  0.93790000   2.20882780
  0.93790000   2.20882477
  0.93790000   2.20881817
  0.93790000   2.20881444
  0.93790000   2.20880953
  0.93790000   2.20880587
  0.93790000   2.20880192
  0.93790000   2.20879856
  0.93790000   2.20879522
  0.93790000   2.20879221
  0.93790000   2.20878930
  0.93790000   2.20878662
  0.93790000   2.20878405
  0.93790000   2.20878165
  0.93790000   2.20877936
  0.93790000   2.20877720
  0.93790000   2.20877515
  0.93790000   2.20877320
  0.93790000   2.20877134
  0.93790000   2.20876957
  0.93790000   2.20876788
  0.93800000   2.20929940
  0.93800000   2.20930024
  0.93800000   2.20928961
  0.93800000   2.20928696
  0.93800000   2.20928012
  0.93800000   2.20927654
  0.93800000   2.20927154
  0.93800000   2.20926795
  0.93800000   2.20926395
  0.93800000   2.20926062
  0.93800000   2.20925726
  0.93800000   2.20925426
  0.93800000   2.20925135
  0.93800000   2.20924867
  0.93800000   2.20924610
  0.93800000   2.20924370
  0.93800000   2.20924141
  0.93800000   2.20923925
  0.93800000   2.20923720
  0.93800000   2.20923525
  0.93800000   2.20923339
  0.93800000   2.20923162
  0.93800000   2.20922993
  0.93810000   2.20975964
  0.93810000   2.20976150
  0.93810000   2.20975022
  0.93810000   2.20974799
  0.93810000   2.20974088
  0.93810000   2.20973748
  0.93810000   2.20973237
  0.93810000   2.20972884
  0.93810000   2.20972480
  0.93810000   2.20972150
  0.93810000   2.20971812
  0.93810000   2.20971514
  0.93810000   2.20971222
  0.93810000   2.20970954
  0.93810000   2.20970697
  0.93810000   2.20970457
  0.93810000   2.20970228
  0.93810000   2.20970013
  0.93810000   2.20969807
  0.93810000   2.20969612
  0.93810000   2.20969426
  0.93810000   2.20969250
  0.93810000   2.20969081
  0.93820000   2.21021863
  0.93820000   2.21022164
  0.93820000   2.21020962
  0.93820000   2.21020786
  0.93820000   2.21020046
  0.93820000   2.21019725
  0.93820000   2.21019201
  0.93820000   2.21018857
  0.93820000   2.21018448
  0.93820000   2.21018121
  0.93820000   2.21017781
  0.93820000   2.21017484
  0.93820000   2.21017191
  0.93820000   2.21016924
  0.93820000   2.21016667
  0.93820000   2.21016427
  0.93820000   2.21016198
  0.93820000   2.21015983
  0.93820000   2.21015777
  0.93820000   2.21015582
  0.93820000   2.21015396
  0.93820000   2.21015220
  0.93820000   2.21015051
  0.93830000   2.21067639
  0.93830000   2.21068066
  0.93830000   2.21066782
  0.93830000   2.21066660
  0.93830000   2.21065885
  0.93830000   2.21065586
  0.93830000   2.21065048
  0.93830000   2.21064714
  0.93830000   2.21064298
  0.93830000   2.21063976
  0.93830000   2.21063633
  0.93830000   2.21063338
  0.93830000   2.21063044
  0.93830000   2.21062778
  0.93830000   2.21062520
  0.93830000   2.21062281
  0.93830000   2.21062051
  0.93830000   2.21061836
  0.93830000   2.21061630
  0.93830000   2.21061435
  0.93830000   2.21061250
  0.93830000   2.21061073
  0.93830000   2.21060904
  0.93840000   2.21113290
  0.93840000   2.21113857
  0.93840000   2.21112482
  0.93840000   2.21112419
  0.93840000   2.21111605
  0.93840000   2.21111333
  0.93840000   2.21110778
  0.93840000   2.21110454
  0.93840000   2.21110032
  0.93840000   2.21109714
  0.93840000   2.21109369
  0.93840000   2.21109075
  0.93840000   2.21108780
  0.93840000   2.21108515
  0.93840000   2.21108257
  0.93840000   2.21108017
  0.93840000   2.21107788
  0.93840000   2.21107573
  0.93840000   2.21107367
  0.93840000   2.21107172
  0.93840000   2.21106986
  0.93840000   2.21106810
  0.93840000   2.21106641
  0.93850000   2.21158816
  0.93850000   2.21159538
  0.93850000   2.21158061
  0.93850000   2.21158066
  0.93850000   2.21157208
  0.93850000   2.21156965
  0.93850000   2.21156391
  0.93850000   2.21156080
  0.93850000   2.21155650
  0.93850000   2.21155337
  0.93850000   2.21154988
  0.93850000   2.21154697
  0.93850000   2.21154401
  0.93850000   2.21154136
  0.93850000   2.21153877
  0.93850000   2.21153639
  0.93850000   2.21153409
  0.93850000   2.21153194
  0.93850000   2.21152988
  0.93850000   2.21152794
  0.93850000   2.21152608
  0.93850000   2.21152431
  0.93850000   2.21152262
  0.93860000   2.21204216
  0.93860000   2.21205112
  0.93860000   2.21203521
  0.93860000   2.21203601
  0.93860000   2.21202694
  0.93860000   2.21202483
  0.93860000   2.21201888
  0.93860000   2.21201591
  0.93860000   2.21201151
  0.93860000   2.21200845
  0.93860000   2.21200492
  0.93860000   2.21200204
  0.93860000   2.21199906
  0.93860000   2.21199642
  0.93860000   2.21199383
  0.93860000   2.21199145
  0.93860000   2.21198915
  0.93860000   2.21198700
  0.93860000   2.21198494
  0.93860000   2.21198299
  0.93860000   2.21198114
  0.93860000   2.21197937
  0.93860000   2.21197768
  0.93870000   2.21249492
  0.93870000   2.21250577
  0.93870000   2.21248861
  0.93870000   2.21249025
  0.93870000   2.21248062
  0.93870000   2.21247888
  0.93870000   2.21247269
  0.93870000   2.21246988
  0.93870000   2.21246538
  0.93870000   2.21246239
  0.93870000   2.21245882
  0.93870000   2.21245596
  0.93870000   2.21245296
  0.93870000   2.21245034
  0.93870000   2.21244774
  0.93870000   2.21244536
  0.93870000   2.21244306
  0.93870000   2.21244091
  0.93870000   2.21243885
  0.93870000   2.21243691
  0.93870000   2.21243505
  0.93870000   2.21243328
  0.93870000   2.21243159
  0.93880000   2.21294642
  0.93880000   2.21295937
  0.93880000   2.21294081
  0.93880000   2.21294338
  0.93880000   2.21293314
  0.93880000   2.21293181
  0.93880000   2.21292535
  0.93880000   2.21292272
  0.93880000   2.21291810
  0.93880000   2.21291519
  0.93880000   2.21291156
  0.93880000   2.21290874
  0.93880000   2.21290572
  0.93880000   2.21290311
  0.93880000   2.21290050
  0.93880000   2.21289813
  0.93880000   2.21289583
  0.93880000   2.21289368
  0.93880000   2.21289162
  0.93880000   2.21288968
  0.93880000   2.21288782
  0.93880000   2.21288605
  0.93880000   2.21288436
  0.93890000   2.21339665
  0.93890000   2.21341193
  0.93890000   2.21339181
  0.93890000   2.21339542
  0.93890000   2.21338448
  0.93890000   2.21338362
  0.93890000   2.21337685
  0.93890000   2.21337443
  0.93890000   2.21336967
  0.93890000   2.21336685
  0.93890000   2.21336317
  0.93890000   2.21336039
  0.93890000   2.21335734
  0.93890000   2.21335475
  0.93890000   2.21335213
  0.93890000   2.21334977
  0.93890000   2.21334746
  0.93890000   2.21334532
  0.93890000   2.21334325
  0.93890000   2.21334131
  0.93890000   2.21333945
  0.93890000   2.21333769
  0.93890000   2.21333600
  0.93900000   2.21384561
  0.93900000   2.21386344
  0.93900000   2.21384160
  0.93900000   2.21384638
  0.93900000   2.21383466
  0.93900000   2.21383433
  0.93900000   2.21382721
  0.93900000   2.21382502
  0.93900000   2.21382011
  0.93900000   2.21381739
  0.93900000   2.21381364
  0.93900000   2.21381091
  0.93900000   2.21380783
  0.93900000   2.21380526
  0.93900000   2.21380262
  0.93900000   2.21380027
  0.93900000   2.21379796
  0.93900000   2.21379582
  0.93900000   2.21379375
  0.93900000   2.21379181
  0.93900000   2.21378995
  0.93900000   2.21378819
  0.93900000   2.21378650
  0.93910000   2.21429330
  0.93910000   2.21431394
  0.93910000   2.21429020
  0.93910000   2.21429627
  0.93910000   2.21428368
  0.93910000   2.21428393
  0.93910000   2.21427642
  0.93910000   2.21427450
  0.93910000   2.21426941
  0.93910000   2.21426681
  0.93910000   2.21426298
  0.93910000   2.21426030
  0.93910000   2.21425719
  0.93910000   2.21425464
  0.93910000   2.21425199
  0.93910000   2.21424965
  0.93910000   2.21424733
  0.93910000   2.21424520
  0.93910000   2.21424313
  0.93910000   2.21424119
  0.93910000   2.21423933
  0.93910000   2.21423756
  0.93910000   2.21423587
  0.93920000   2.21473971
  0.93920000   2.21476343
  0.93920000   2.21473759
  0.93920000   2.21474509
  0.93920000   2.21473154
  0.93920000   2.21473244
  0.93920000   2.21472449
  0.93920000   2.21472287
  0.93920000   2.21471758
  0.93920000   2.21471512
  0.93920000   2.21471119
  0.93920000   2.21470858
  0.93920000   2.21470542
  0.93920000   2.21470291
  0.93920000   2.21470024
  0.93920000   2.21469791
  0.93920000   2.21469558
  0.93920000   2.21469345
  0.93920000   2.21469138
  0.93920000   2.21468945
  0.93920000   2.21468758
  0.93920000   2.21468582
  0.93920000   2.21468413
  0.93930000   2.21518482
  0.93930000   2.21521193
  0.93930000   2.21518378
  0.93930000   2.21519286
  0.93930000   2.21517823
  0.93930000   2.21517987
  0.93930000   2.21517142
  0.93930000   2.21517014
  0.93930000   2.21516462
  0.93930000   2.21516232
  0.93930000   2.21515829
  0.93930000   2.21515574
  0.93930000   2.21515254
  0.93930000   2.21515006
  0.93930000   2.21514737
  0.93930000   2.21514505
  0.93930000   2.21514271
  0.93930000   2.21514059
  0.93930000   2.21513852
  0.93930000   2.21513659
  0.93930000   2.21513472
  0.93930000   2.21513296
  0.93930000   2.21513127
  0.93940000   2.21562864
  0.93940000   2.21565946
  0.93940000   2.21562876
  0.93940000   2.21563959
  0.93940000   2.21562376
  0.93940000   2.21562623
  0.93940000   2.21561721
  0.93940000   2.21561632
  0.93940000   2.21561053
  0.93940000   2.21560841
  0.93940000   2.21560426
  0.93940000   2.21560180
  0.93940000   2.21559854
  0.93940000   2.21559610
  0.93940000   2.21559338
  0.93940000   2.21559109
  0.93940000   2.21558873
  0.93940000   2.21558662
  0.93940000   2.21558454
  0.93940000   2.21558261
  0.93940000   2.21558075
  0.93940000   2.21557899
  0.93940000   2.21557729
  0.93950000   2.21607114
  0.93950000   2.21610602
  0.93950000   2.21607252
  0.93950000   2.21608529
  0.93950000   2.21606813
  0.93950000   2.21607151
  0.93950000   2.21606187
  0.93950000   2.21606141
  0.93950000   2.21605533
  0.93950000   2.21605341
  0.93950000   2.21604912
  0.93950000   2.21604676
  0.93950000   2.21604343
  0.93950000   2.21604104
  0.93950000   2.21603829
  0.93950000   2.21603601
  0.93950000   2.21603365
  0.93950000   2.21603155
  0.93950000   2.21602946
  0.93950000   2.21602754
  0.93950000   2.21602566
  0.93950000   2.21602391
  0.93950000   2.21602221
  0.93960000   2.21651233
  0.93960000   2.21655165
  0.93960000   2.21651507
  0.93960000   2.21652997
  0.93960000   2.21651134
  0.93960000   2.21651574
  0.93960000   2.21650540
  0.93960000   2.21650542
  0.93960000   2.21649901
  0.93960000   2.21649732
  0.93960000   2.21649288
  0.93960000   2.21649062
  0.93960000   2.21648722
  0.93960000   2.21648487
  0.93960000   2.21648209
  0.93960000   2.21647984
  0.93960000   2.21647746
  0.93960000   2.21647537
  0.93960000   2.21647327
  0.93960000   2.21647136
  0.93960000   2.21646948
  0.93960000   2.21646773
  0.93960000   2.21646603
  0.93970000   2.21695218
  0.93970000   2.21699635
  0.93970000   2.21695639
  0.93970000   2.21697365
  0.93970000   2.21695338
  0.93970000   2.21695892
  0.93970000   2.21694779
  0.93970000   2.21694836
  0.93970000   2.21694158
  0.93970000   2.21694015
  0.93970000   2.21693552
  0.93970000   2.21693339
  0.93970000   2.21692991
  0.93970000   2.21692762
  0.93970000   2.21692480
  0.93970000   2.21692258
  0.93970000   2.21692018
  0.93970000   2.21691810
  0.93970000   2.21691599
  0.93970000   2.21691408
  0.93970000   2.21691220
  0.93970000   2.21691045
  0.93970000   2.21690876
  0.93980000   2.21739068
  0.93980000   2.21744015
  0.93980000   2.21739649
  0.93980000   2.21741634
  0.93980000   2.21739426
  0.93980000   2.21740107
  0.93980000   2.21738906
  0.93980000   2.21739024
  0.93980000   2.21738303
  0.93980000   2.21738190
  0.93980000   2.21737707
  0.93980000   2.21737508
  0.93980000   2.21737150
  0.93980000   2.21736928
  0.93980000   2.21736641
  0.93980000   2.21736422
  0.93980000   2.21736180
  0.93980000   2.21735974
  0.93980000   2.21735762
  0.93980000   2.21735572
  0.93980000   2.21735383
  0.93980000   2.21735209
  0.93980000   2.21735039
  0.93990000   2.21782783
  0.93990000   2.21788307
  0.93990000   2.21783534
  0.93990000   2.21785805
  0.93990000   2.21783397
  0.93990000   2.21784218
  0.93990000   2.21782919
  0.93990000   2.21783106
  0.93990000   2.21782337
  0.93990000   2.21782257
  0.93990000   2.21781751
  0.93990000   2.21781568
  0.93990000   2.21781199
  0.93990000   2.21780985
  0.93990000   2.21780693
  0.93990000   2.21780478
  0.93990000   2.21780233
  0.93990000   2.21780029
  0.93990000   2.21779816
  0.93990000   2.21779627
  0.93990000   2.21779438
  0.93990000   2.21779263
  0.93990000   2.21779093
  0.94000000   2.21826360
  0.94000000   2.21832512
  0.94000000   2.21827296
  0.94000000   2.21829880
  0.94000000   2.21827252
  0.94000000   2.21828228
  0.94000000   2.21826820
  0.94000000   2.21827083
  0.94000000   2.21826261
  0.94000000   2.21826219
  0.94000000   2.21825687
  0.94000000   2.21825522
  0.94000000   2.21825140
  0.94000000   2.21824935
  0.94000000   2.21824637
  0.94000000   2.21824426
  0.94000000   2.21824178
  0.94000000   2.21823976
  0.94000000   2.21823762
  0.94000000   2.21823573
  0.94000000   2.21823384
  0.94000000   2.21823210
  0.94000000   2.21823040
  0.94010000   2.21869797
  0.94010000   2.21876633
  0.94010000   2.21870932
  0.94010000   2.21873861
  0.94010000   2.21870988
  0.94010000   2.21872137
  0.94010000   2.21870607
  0.94010000   2.21870957
  0.94010000   2.21870074
  0.94010000   2.21870075
  0.94010000   2.21869513
  0.94010000   2.21869369
  0.94010000   2.21868973
  0.94010000   2.21868778
  0.94010000   2.21868472
  0.94010000   2.21868267
  0.94010000   2.21868015
  0.94010000   2.21867816
  0.94010000   2.21867600
  0.94010000   2.21867413
  0.94010000   2.21867222
  0.94010000   2.21867049
  0.94010000   2.21866878
  0.94020000   2.21913094
  0.94020000   2.21920673
  0.94020000   2.21914441
  0.94020000   2.21917748
  0.94020000   2.21914607
  0.94020000   2.21915947
  0.94020000   2.21914282
  0.94020000   2.21914727
  0.94020000   2.21913777
  0.94020000   2.21913825
  0.94020000   2.21913230
  0.94020000   2.21913110
  0.94020000   2.21912697
  0.94020000   2.21912514
  0.94020000   2.21912200
  0.94020000   2.21912000
  0.94020000   2.21911745
  0.94020000   2.21911548
  0.94020000   2.21911331
  0.94020000   2.21911145
  0.94020000   2.21910953
  0.94020000   2.21910781
  0.94020000   2.21910610
  0.94030000   2.21956248
  0.94030000   2.21964633
  0.94030000   2.21957823
  0.94030000   2.21961545
  0.94030000   2.21958108
  0.94030000   2.21959659
  0.94030000   2.21957844
  0.94030000   2.21958396
  0.94030000   2.21957370
  0.94030000   2.21957472
  0.94030000   2.21956839
  0.94030000   2.21956746
  0.94030000   2.21956314
  0.94030000   2.21956144
  0.94030000   2.21955821
  0.94030000   2.21955628
  0.94030000   2.21955368
  0.94030000   2.21955174
  0.94030000   2.21954954
  0.94030000   2.21954770
  0.94030000   2.21954578
  0.94030000   2.21954406
  0.94030000   2.21954234
  0.94040000   2.21999256
  0.94040000   2.22008517
  0.94040000   2.22001077
  0.94040000   2.22005251
  0.94040000   2.22001490
  0.94040000   2.22003274
  0.94040000   2.22001292
  0.94040000   2.22001964
  0.94040000   2.22000853
  0.94040000   2.22001015
  0.94040000   2.22000339
  0.94040000   2.22000277
  0.94040000   2.21999823
  0.94040000   2.21999669
  0.94040000   2.21999335
  0.94040000   2.21999149
  0.94040000   2.21998884
  0.94040000   2.21998695
  0.94040000   2.21998472
  0.94040000   2.21998290
  0.94040000   2.21998096
  0.94040000   2.21997925
  0.94040000   2.21997752
  0.94050000   2.22042117
  0.94050000   2.22052326
  0.94050000   2.22044201
  0.94050000   2.22048871
  0.94050000   2.22044752
  0.94050000   2.22046793
  0.94050000   2.22044627
  0.94050000   2.22045431
  0.94050000   2.22044226
  0.94050000   2.22044456
  0.94050000   2.22043731
  0.94050000   2.22043704
  0.94050000   2.22043225
  0.94050000   2.22043089
  0.94050000   2.22042742
  0.94050000   2.22042566
  0.94050000   2.22042294
  0.94050000   2.22042109
  0.94050000   2.22041883
  0.94050000   2.22041703
  0.94050000   2.22041508
  0.94050000   2.22041338
  0.94050000   2.22041165
  0.94060000   2.22084829
  0.94060000   2.22096064
  0.94060000   2.22087193
  0.94060000   2.22092404
  0.94060000   2.22087894
  0.94060000   2.22090219
  0.94060000   2.22087848
  0.94060000   2.22088799
  0.94060000   2.22087488
  0.94060000   2.22087795
  0.94060000   2.22087015
  0.94060000   2.22087027
  0.94060000   2.22086521
  0.94060000   2.22086404
  0.94060000   2.22086043
  0.94060000   2.22085877
  0.94060000   2.22085598
  0.94060000   2.22085419
  0.94060000   2.22085189
  0.94060000   2.22085012
  0.94060000   2.22084814
  0.94060000   2.22084646
  0.94060000   2.22084472
  0.94070000   2.22127388
  0.94070000   2.22139734
  0.94070000   2.22130053
  0.94070000   2.22135855
  0.94070000   2.22130915
  0.94070000   2.22133552
  0.94070000   2.22130955
  0.94070000   2.22132070
  0.94070000   2.22130640
  0.94070000   2.22131033
  0.94070000   2.22130191
  0.94070000   2.22130248
  0.94070000   2.22129710
  0.94070000   2.22129616
  0.94070000   2.22129239
  0.94070000   2.22129085
  0.94070000   2.22128797
  0.94070000   2.22128624
  0.94070000   2.22128390
  0.94070000   2.22128216
  0.94070000   2.22128016
  0.94070000   2.22127849
  0.94070000   2.22127674
  0.94080000   2.22169793
  0.94080000   2.22183338
  0.94080000   2.22172777
  0.94080000   2.22179224
  0.94080000   2.22173814
  0.94080000   2.22176794
  0.94080000   2.22173947
  0.94080000   2.22175244
  0.94080000   2.22173683
  0.94080000   2.22174171
  0.94080000   2.22173260
  0.94080000   2.22173367
  0.94080000   2.22172792
  0.94080000   2.22172725
  0.94080000   2.22172329
  0.94080000   2.22172189
  0.94080000   2.22171891
  0.94080000   2.22171725
  0.94080000   2.22171486
  0.94080000   2.22171315
  0.94080000   2.22171113
  0.94080000   2.22170948
  0.94080000   2.22170772
  0.94090000   2.22212040
  0.94090000   2.22226881
  0.94090000   2.22215366
  0.94090000   2.22222514
  0.94090000   2.22216589
  0.94090000   2.22219946
  0.94090000   2.22216824
  0.94090000   2.22218323
  0.94090000   2.22216614
  0.94090000   2.22217210
  0.94090000   2.22216221
  0.94090000   2.22216385
  0.94090000   2.22215769
  0.94090000   2.22215732
  0.94090000   2.22215314
  0.94090000   2.22215189
  0.94090000   2.22214881
  0.94090000   2.22214722
  0.94090000   2.22214477
  0.94090000   2.22214311
  0.94090000   2.22214106
  0.94090000   2.22213944
  0.94090000   2.22213765
  0.94100000   2.22254126
  0.94100000   2.22270364
  0.94100000   2.22257816
  0.94100000   2.22265727
  0.94100000   2.22259241
  0.94100000   2.22263011
  0.94100000   2.22259586
  0.94100000   2.22261307
  0.94100000   2.22259436
  0.94100000   2.22260150
  0.94100000   2.22259075
  0.94100000   2.22259302
  0.94100000   2.22258640
  0.94100000   2.22258637
  0.94100000   2.22258194
  0.94100000   2.22258087
  0.94100000   2.22257766
  0.94100000   2.22257617
  0.94100000   2.22257365
  0.94100000   2.22257204
  0.94100000   2.22256995
  0.94100000   2.22256836
  0.94100000   2.22256656
  0.94110000   2.22296048
  0.94110000   2.22313793
  0.94110000   2.22300126
  0.94110000   2.22308867
  0.94110000   2.22301766
  0.94110000   2.22305991
  0.94110000   2.22302231
  0.94110000   2.22304199
  0.94110000   2.22302146
  0.94110000   2.22302994
  0.94110000   2.22301821
  0.94110000   2.22302120
  0.94110000   2.22301405
  0.94110000   2.22301440
  0.94110000   2.22300970
  0.94110000   2.22300884
  0.94110000   2.22300547
  0.94110000   2.22300409
  0.94110000   2.22300150
  0.94110000   2.22299994
  0.94110000   2.22299781
  0.94110000   2.22299625
  0.94110000   2.22299442
  0.94120000   2.22337804
  0.94120000   2.22357169
  0.94120000   2.22342293
  0.94120000   2.22351936
  0.94120000   2.22344165
  0.94120000   2.22348887
  0.94120000   2.22344759
  0.94120000   2.22346999
  0.94120000   2.22344745
  0.94120000   2.22345742
  0.94120000   2.22344459
  0.94120000   2.22344839
  0.94120000   2.22344065
  0.94120000   2.22344144
  0.94120000   2.22343642
  0.94120000   2.22343579
  0.94120000   2.22343225
  0.94120000   2.22343100
  0.94120000   2.22342831
  0.94120000   2.22342682
  0.94120000   2.22342465
  0.94120000   2.22342312
  0.94120000   2.22342127
  0.94130000   2.22379388
  0.94130000   2.22400499
  0.94130000   2.22384314
  0.94130000   2.22394936
  0.94130000   2.22386435
  0.94130000   2.22391702
  0.94130000   2.22387168
  0.94130000   2.22389710
  0.94130000   2.22387233
  0.94130000   2.22388395
  0.94130000   2.22386990
  0.94130000   2.22387460
  0.94130000   2.22386620
  0.94130000   2.22386747
  0.94130000   2.22386209
  0.94130000   2.22386173
  0.94130000   2.22385800
  0.94130000   2.22385689
  0.94130000   2.22385410
  0.94130000   2.22385269
  0.94130000   2.22385045
  0.94130000   2.22384896
  0.94130000   2.22384708
  0.94140000   2.22420798
  0.94140000   2.22443784
  0.94140000   2.22426188
  0.94140000   2.22437871
  0.94140000   2.22428575
  0.94140000   2.22434437
  0.94140000   2.22429459
  0.94140000   2.22432332
  0.94140000   2.22429608
  0.94140000   2.22430954
  0.94140000   2.22429413
  0.94140000   2.22429984
  0.94140000   2.22429069
  0.94140000   2.22429252
  0.94140000   2.22428673
  0.94140000   2.22428667
  0.94140000   2.22428272
  0.94140000   2.22428177
  0.94140000   2.22427886
  0.94140000   2.22427754
  0.94140000   2.22427524
  0.94140000   2.22427380
  0.94140000   2.22427189
  0.94150000   2.22462030
  0.94150000   2.22487030
  0.94150000   2.22467912
  0.94150000   2.22480744
  0.94150000   2.22470583
  0.94150000   2.22477095
  0.94150000   2.22471629
  0.94150000   2.22474868
  0.94150000   2.22471871
  0.94150000   2.22473421
  0.94150000   2.22471728
  0.94150000   2.22472412
  0.94150000   2.22471413
  0.94150000   2.22471659
  0.94150000   2.22471033
  0.94150000   2.22471062
  0.94150000   2.22470641
  0.94150000   2.22470565
  0.94150000   2.22470260
  0.94150000   2.22470139
  0.94150000   2.22469901
  0.94150000   2.22469763
  0.94150000   2.22469567
  0.94160000   2.22503079
  0.94160000   2.22530241
  0.94160000   2.22509482
  0.94160000   2.22523557
  0.94160000   2.22512456
  0.94160000   2.22519678
  0.94160000   2.22513678
  0.94160000   2.22517320
  0.94160000   2.22514020
  0.94160000   2.22515797
  0.94160000   2.22513934
  0.94160000   2.22514746
  0.94160000   2.22513651
  0.94160000   2.22513969
  0.94160000   2.22513290
  0.94160000   2.22513358
  0.94160000   2.22512907
  0.94160000   2.22512854
  0.94160000   2.22512532
  0.94160000   2.22512423
  0.94160000   2.22512176
  0.94160000   2.22512045
  0.94160000   2.22511844
  0.94170000   2.22543942
  0.94170000   2.22573421
  0.94170000   2.22550896
  0.94170000   2.22566316
  0.94170000   2.22554194
  0.94170000   2.22562190
  0.94170000   2.22555604
  0.94170000   2.22559688
  0.94170000   2.22556055
  0.94170000   2.22558084
  0.94170000   2.22556031
  0.94170000   2.22556985
  0.94170000   2.22555784
  0.94170000   2.22556182
  0.94170000   2.22555443
  0.94170000   2.22555556
  0.94170000   2.22555072
  0.94170000   2.22555044
  0.94170000   2.22554703
  0.94170000   2.22554608
  0.94170000   2.22554351
  0.94170000   2.22554227
  0.94170000   2.22554021
  0.94180000   2.22584614
  0.94180000   2.22616575
  0.94180000   2.22592149
  0.94180000   2.22609022
  0.94180000   2.22595793
  0.94180000   2.22604632
  0.94180000   2.22597406
  0.94180000   2.22601976
  0.94180000   2.22597975
  0.94180000   2.22600282
  0.94180000   2.22598020
  0.94180000   2.22599133
  0.94180000   2.22597812
  0.94180000   2.22598299
  0.94180000   2.22597493
  0.94180000   2.22597657
  0.94180000   2.22597135
  0.94180000   2.22597135
  0.94180000   2.22596773
  0.94180000   2.22596694
  0.94180000   2.22596425
  0.94180000   2.22596310
  0.94180000   2.22596097
  0.94190000   2.22625091
  0.94190000   2.22659708
  0.94190000   2.22633240
  0.94190000   2.22651681
  0.94190000   2.22637251
  0.94190000   2.22647008
  0.94190000   2.22639083
  0.94190000   2.22644185
  0.94190000   2.22639779
  0.94190000   2.22642394
  0.94190000   2.22639898
  0.94190000   2.22641188
  0.94190000   2.22639733
  0.94190000   2.22640322
  0.94190000   2.22639439
  0.94190000   2.22639661
  0.94190000   2.22639096
  0.94190000   2.22639129
  0.94190000   2.22638742
  0.94190000   2.22638682
  0.94190000   2.22638399
  0.94190000   2.22638295
  0.94190000   2.22638074
  0.94200000   2.22665367
  0.94200000   2.22702825
  0.94200000   2.22674164
  0.94200000   2.22694295
  0.94200000   2.22678566
  0.94200000   2.22689321
  0.94200000   2.22680631
  0.94200000   2.22686319
  0.94200000   2.22681466
  0.94200000   2.22684422
  0.94200000   2.22681666
  0.94200000   2.22683153
  0.94200000   2.22681549
  0.94200000   2.22682252
  0.94200000   2.22681283
  0.94200000   2.22681570
  0.94200000   2.22680955
  0.94200000   2.22681026
  0.94200000   2.22680611
  0.94200000   2.22680572
  0.94200000   2.22680273
  0.94200000   2.22680181
  0.94200000   2.22679951
  0.94210000   2.22705438
  0.94210000   2.22745931
  0.94210000   2.22714917
  0.94210000   2.22736870
  0.94210000   2.22719734
  0.94210000   2.22731573
  0.94210000   2.22722050
  0.94210000   2.22728378
  0.94210000   2.22723035
  0.94210000   2.22726366
  0.94210000   2.22723323
  0.94210000   2.22725030
  0.94210000   2.22723258
  0.94210000   2.22724089
  0.94210000   2.22723023
  0.94210000   2.22723384
  0.94210000   2.22722713
  0.94210000   2.22722826
  0.94210000   2.22722379
  0.94210000   2.22722364
  0.94210000   2.22722047
  0.94210000   2.22721969
  0.94210000   2.22721728
  0.94220000   2.22745299
  0.94220000   2.22789031
  0.94220000   2.22755495
  0.94220000   2.22779409
  0.94220000   2.22760754
  0.94220000   2.22773769
  0.94220000   2.22763337
  0.94220000   2.22770366
  0.94220000   2.22764483
  0.94220000   2.22768229
  0.94220000   2.22764869
  0.94220000   2.22766820
  0.94220000   2.22764861
  0.94220000   2.22765834
  0.94220000   2.22764659
  0.94220000   2.22765104
  0.94220000   2.22764369
  0.94220000   2.22764531
  0.94220000   2.22764047
  0.94220000   2.22764060
  0.94220000   2.22763721
  0.94220000   2.22763660
  0.94220000   2.22763407
  0.94230000   2.22784944
  0.94230000   2.22832132
  0.94230000   2.22795894
  0.94230000   2.22821917
  0.94230000   2.22801620
  0.94230000   2.22815912
  0.94230000   2.22804490
  0.94230000   2.22812285
  0.94230000   2.22805811
  0.94230000   2.22810014
  0.94230000   2.22806301
  0.94230000   2.22808523
  0.94230000   2.22806356
  0.94230000   2.22807490
  0.94230000   2.22806191
  0.94230000   2.22806730
  0.94230000   2.22805923
  0.94230000   2.22806141
  0.94230000   2.22805614
  0.94230000   2.22805661
  0.94230000   2.22805297
  0.94230000   2.22805254
  0.94230000   2.22804987
  0.94240000   2.22824369
  0.94240000   2.22875238
  0.94240000   2.22836110
  0.94240000   2.22864398
  0.94240000   2.22842331
  0.94240000   2.22858004
  0.94240000   2.22845507
  0.94240000   2.22854139
  0.94240000   2.22847015
  0.94240000   2.22851722
  0.94240000   2.22847619
  0.94240000   2.22850143
  0.94240000   2.22847743
  0.94240000   2.22849056
  0.94240000   2.22847620
  0.94240000   2.22848265
  0.94240000   2.22847377
  0.94240000   2.22847657
  0.94240000   2.22847082
  0.94240000   2.22847165
  0.94240000   2.22846773
  0.94240000   2.22846752
  0.94240000   2.22846468
  0.94250000   2.22863567
  0.94250000   2.22918356
  0.94250000   2.22876138
  0.94250000   2.22906858
  0.94250000   2.22882883
  0.94250000   2.22900052
  0.94250000   2.22886385
  0.94250000   2.22895930
  0.94250000   2.22888095
  0.94250000   2.22893355
  0.94250000   2.22888823
  0.94250000   2.22891680
  0.94250000   2.22889022
  0.94250000   2.22890535
  0.94250000   2.22888944
  0.94250000   2.22889709
  0.94250000   2.22888728
  0.94250000   2.22889080
  0.94250000   2.22888450
  0.94250000   2.22888576
  0.94250000   2.22888151
  0.94250000   2.22888155
  0.94250000   2.22887852
  0.94260000   2.22902533
  0.94260000   2.22961492
  0.94260000   2.22915973
  0.94260000   2.22949302
  0.94260000   2.22923271
  0.94260000   2.22942057
  0.94260000   2.22927122
  0.94260000   2.22937661
  0.94260000   2.22929048
  0.94260000   2.22934917
  0.94260000   2.22929909
  0.94260000   2.22933137
  0.94260000   2.22930191
  0.94260000   2.22931928
  0.94260000   2.22930163
  0.94260000   2.22931063
  0.94260000   2.22929978
  0.94260000   2.22930410
  0.94260000   2.22929718
  0.94260000   2.22929892
  0.94260000   2.22929430
  0.94260000   2.22929463
  0.94260000   2.22929138
  0.94270000   2.22941262
  0.94270000   2.23004652
  0.94270000   2.22955610
  0.94270000   2.22991735
  0.94270000   2.22963493
  0.94270000   2.22984025
  0.94270000   2.22967714
  0.94270000   2.22979337
  0.94270000   2.22969872
  0.94270000   2.22976409
  0.94270000   2.22970879
  0.94270000   2.22974515
  0.94270000   2.22971249
  0.94270000   2.22973236
  0.94270000   2.22971277
  0.94270000   2.22972328
  0.94270000   2.22971125
  0.94270000   2.22971649
  0.94270000   2.22970886
  0.94270000   2.22971115
  0.94270000   2.22970611
  0.94270000   2.22970677
  0.94270000   2.22970326
  0.94280000   2.22979747
  0.94280000   2.23047842
  0.94280000   2.22995045
  0.94280000   2.23034161
  0.94280000   2.23003543
  0.94280000   2.23025961
  0.94280000   2.23008157
  0.94280000   2.23020959
  0.94280000   2.23010566
  0.94280000   2.23017834
  0.94280000   2.23011728
  0.94280000   2.23015817
  0.94280000   2.23012197
  0.94280000   2.23014462
  0.94280000   2.23012285
  0.94280000   2.23013506
  0.94280000   2.23012170
  0.94280000   2.23012798
  0.94280000   2.23011954
  0.94280000   2.23012246
  0.94280000   2.23011693
  0.94280000   2.23011797
  0.94280000   2.23011416
  0.94290000   2.23017983
  0.94290000   2.23091068
  0.94290000   2.23034272
  0.94290000   2.23076588
  0.94290000   2.23043418
  0.94290000   2.23067868
  0.94290000   2.23048450
  0.94290000   2.23062533
  0.94290000   2.23051125
  0.94290000   2.23059195
  0.94290000   2.23052457
  0.94290000   2.23057045
  0.94290000   2.23053032
  0.94290000   2.23055606
  0.94290000   2.23053186
  0.94290000   2.23054598
  0.94290000   2.23053113
  0.94290000   2.23053858
  0.94290000   2.23052922
  0.94290000   2.23053286
  0.94290000   2.23052676
  0.94290000   2.23052825
  0.94290000   2.23052410
  0.94300000   2.23055963
  0.94300000   2.23134337
  0.94300000   2.23073286
  0.94300000   2.23119021
  0.94300000   2.23083112
  0.94300000   2.23109752
  0.94300000   2.23088588
  0.94300000   2.23104061
  0.94300000   2.23091549
  0.94300000   2.23100496
  0.94300000   2.23093063
  0.94300000   2.23098201
  0.94300000   2.23093753
  0.94300000   2.23096670
  0.94300000   2.23093980
  0.94300000   2.23095606
  0.94300000   2.23093952
  0.94300000   2.23094829
  0.94300000   2.23093790
  0.94300000   2.23094236
  0.94300000   2.23093562
  0.94300000   2.23093760
  0.94300000   2.23093306
  0.94310000   2.23093683
  0.94310000   2.23177656
  0.94310000   2.23112081
  0.94310000   2.23161464
  0.94310000   2.23122622
  0.94310000   2.23151617
  0.94310000   2.23128568
  0.94310000   2.23145549
  0.94310000   2.23131833
  0.94310000   2.23141740
  0.94310000   2.23133543
  0.94310000   2.23139288
  0.94310000   2.23134358
  0.94310000   2.23137658
  0.94310000   2.23134665
  0.94310000   2.23136530
  0.94310000   2.23134688
  0.94310000   2.23135714
  0.94310000   2.23134557
  0.94310000   2.23135095
  0.94310000   2.23134349
  0.94310000   2.23134605
  0.94310000   2.23134105
  0.94320000   2.23131136
  0.94320000   2.23221031
  0.94320000   2.23150651
  0.94320000   2.23203926
  0.94320000   2.23161943
  0.94320000   2.23193469
  0.94320000   2.23168385
  0.94320000   2.23187000
  0.94320000   2.23171975
  0.94320000   2.23182929
  0.94320000   2.23173896
  0.94320000   2.23180308
  0.94320000   2.23174847
  0.94320000   2.23178570
  0.94320000   2.23175241
  0.94320000   2.23177373
  0.94320000   2.23175319
  0.94320000   2.23176513
  0.94320000   2.23175223
  0.94320000   2.23175867
  0.94320000   2.23175037
  0.94320000   2.23175359
  0.94320000   2.23174807
  0.94330000   2.23168315
  0.94330000   2.23264468
  0.94330000   2.23188991
  0.94330000   2.23246411
  0.94330000   2.23201069
  0.94330000   2.23235314
  0.94330000   2.23208035
  0.94330000   2.23228418
  0.94330000   2.23211972
  0.94330000   2.23224068
  0.94330000   2.23214119
  0.94330000   2.23221265
  0.94330000   2.23215218
  0.94330000   2.23219409
  0.94330000   2.23215706
  0.94330000   2.23218136
  0.94330000   2.23215844
  0.94330000   2.23217228
  0.94330000   2.23215788
  0.94330000   2.23216551
  0.94330000   2.23215626
  0.94330000   2.23216023
  0.94330000   2.23215412
  0.94340000   2.23205217
  0.94340000   2.23307975
  0.94340000   2.23227096
  0.94340000   2.23288927
  0.94340000   2.23239995
  0.94340000   2.23277156
  0.94340000   2.23247515
  0.94340000   2.23269810
  0.94340000   2.23251820
  0.94340000   2.23265161
  0.94340000   2.23254210
  0.94340000   2.23262161
  0.94340000   2.23255467
  0.94340000   2.23260177
  0.94340000   2.23256059
  0.94340000   2.23258822
  0.94340000   2.23256264
  0.94340000   2.23257860
  0.94340000   2.23256251
  0.94340000   2.23257149
  0.94340000   2.23256117
  0.94340000   2.23256599
  0.94340000   2.23255920
  0.94350000   2.23241834
  0.94350000   2.23351557
  0.94350000   2.23264958
  0.94350000   2.23331478
  0.94350000   2.23278716
  0.94350000   2.23319002
  0.94350000   2.23286819
  0.94350000   2.23311178
  0.94350000   2.23291515
  0.94350000   2.23306211
  0.94350000   2.23294166
  0.94350000   2.23303001
  0.94350000   2.23295594
  0.94350000   2.23300878
  0.94350000   2.23296298
  0.94350000   2.23299432
  0.94350000   2.23296577
  0.94350000   2.23298411
  0.94350000   2.23296611
  0.94350000   2.23297662
  0.94350000   2.23296508
  0.94350000   2.23297088
  0.94350000   2.23296331
  0.94360000   2.23278162
  0.94360000   2.23395222
  0.94360000   2.23302574
  0.94360000   2.23374073
  0.94360000   2.23317227
  0.94360000   2.23360857
  0.94360000   2.23325943
  0.94360000   2.23352530
  0.94360000   2.23331054
  0.94360000   2.23347223
  0.94360000   2.23333983
  0.94360000   2.23343786
  0.94360000   2.23335597
  0.94360000   2.23341513
  0.94360000   2.23336423
  0.94360000   2.23339968
  0.94360000   2.23336782
  0.94360000   2.23338883
  0.94360000   2.23336868
  0.94360000   2.23338091
  0.94360000   2.23336799
  0.94360000   2.23337490
  0.94360000   2.23336644
  0.94370000   2.23314195
  0.94370000   2.23438974
  0.94370000   2.23339936
  0.94370000   2.23416717
  0.94370000   2.23355521
  0.94370000   2.23402727
  0.94370000   2.23364881
  0.94370000   2.23393869
  0.94370000   2.23370432
  0.94370000   2.23388201
  0.94370000   2.23373658
  0.94370000   2.23384521
  0.94370000   2.23375471
  0.94370000   2.23382085
  0.94370000   2.23376430
  0.94370000   2.23380433
  0.94370000   2.23376877
  0.94370000   2.23379277
  0.94370000   2.23377021
  0.94370000   2.23378439
  0.94370000   2.23376989
  0.94370000   2.23377807
  0.94370000   2.23376860
  0.94380000   2.23349930
  0.94380000   2.23482821
  0.94380000   2.23377039
  0.94380000   2.23459416
  0.94380000   2.23393594
  0.94380000   2.23444619
  0.94380000   2.23403630
  0.94380000   2.23435201
  0.94380000   2.23409646
  0.94380000   2.23429149
  0.94380000   2.23413189
  0.94380000   2.23425209
  0.94380000   2.23415216
  0.94380000   2.23422599
  0.94380000   2.23416318
  0.94380000   2.23420829
  0.94380000   2.23416861
  0.94380000   2.23419595
  0.94380000   2.23417069
  0.94380000   2.23418705
  0.94380000   2.23417079
  0.94380000   2.23418040
  0.94380000   2.23416977
  0.94390000   2.23385361
  0.94390000   2.23526768
  0.94390000   2.23413878
  0.94390000   2.23502177
  0.94390000   2.23431440
  0.94390000   2.23486538
  0.94390000   2.23442183
  0.94390000   2.23476532
  0.94390000   2.23448691
  0.94390000   2.23470073
  0.94390000   2.23452571
  0.94390000   2.23465855
  0.94390000   2.23454828
  0.94390000   2.23463056
  0.94390000   2.23456086
  0.94390000   2.23461159
  0.94390000   2.23456733
  0.94390000   2.23459840
  0.94390000   2.23457010
  0.94390000   2.23458894
  0.94390000   2.23457067
  0.94390000   2.23458190
  0.94390000   2.23456996
  0.94400000   2.23420484
  0.94400000   2.23570821
  0.94400000   2.23450448
  0.94400000   2.23545007
  0.94400000   2.23469052
  0.94400000   2.23528492
  0.94400000   2.23480536
  0.94400000   2.23517867
  0.94400000   2.23487561
  0.94400000   2.23510978
  0.94400000   2.23491801
  0.94400000   2.23506463
  0.94400000   2.23494304
  0.94400000   2.23503461
  0.94400000   2.23495729
  0.94400000   2.23501426
  0.94400000   2.23496490
  0.94400000   2.23500014
  0.94400000   2.23496844
  0.94400000   2.23499005
  0.94400000   2.23496953
  0.94400000   2.23498259
  0.94400000   2.23496916
  0.94410000   2.23455297
  0.94410000   2.23614984
  0.94410000   2.23486743
  0.94410000   2.23587911
  0.94410000   2.23506427
  0.94410000   2.23570485
  0.94410000   2.23518683
  0.94410000   2.23559213
  0.94410000   2.23526254
  0.94410000   2.23551869
  0.94410000   2.23530874
  0.94410000   2.23547037
  0.94410000   2.23533641
  0.94410000   2.23543817
  0.94410000   2.23535247
  0.94410000   2.23541633
  0.94410000   2.23536132
  0.94410000   2.23540119
  0.94410000   2.23536570
  0.94410000   2.23539041
  0.94410000   2.23536735
  0.94410000   2.23538249
  0.94410000   2.23536736
  0.94420000   2.23489796
  0.94420000   2.23659261
  0.94420000   2.23522759
  0.94420000   2.23630895
  0.94420000   2.23543557
  0.94420000   2.23612525
  0.94420000   2.23556618
  0.94420000   2.23600575
  0.94420000   2.23564762
  0.94420000   2.23592751
  0.94420000   2.23569786
  0.94420000   2.23587582
  0.94420000   2.23572834
  0.94420000   2.23584128
  0.94420000   2.23574636
  0.94420000   2.23581782
  0.94420000   2.23575655
  0.94420000   2.23580157
  0.94420000   2.23576184
  0.94420000   2.23579004
  0.94420000   2.23576412
  0.94420000   2.23578161
  0.94420000   2.23576456
  0.94430000   2.23523980
  0.94430000   2.23703658
  0.94430000   2.23558491
  0.94430000   2.23673965
  0.94430000   2.23580439
  0.94430000   2.23654618
  0.94430000   2.23594337
  0.94430000   2.23641959
  0.94430000   2.23603082
  0.94430000   2.23633629
  0.94430000   2.23608533
  0.94430000   2.23628103
  0.94430000   2.23611882
  0.94430000   2.23624398
  0.94430000   2.23613893
  0.94430000   2.23621878
  0.94430000   2.23615057
  0.94430000   2.23620132
  0.94430000   2.23615687
  0.94430000   2.23618896
  0.94430000   2.23615983
  0.94430000   2.23617996
  0.94430000   2.23616074
  0.94440000   2.23557847
  0.94440000   2.23748177
  0.94440000   2.23593936
  0.94440000   2.23717126
  0.94440000   2.23617066
  0.94440000   2.23696768
  0.94440000   2.23631834
  0.94440000   2.23683372
  0.94440000   2.23641209
  0.94440000   2.23674510
  0.94440000   2.23647111
  0.94440000   2.23668604
  0.94440000   2.23650779
  0.94440000   2.23664631
  0.94440000   2.23653015
  0.94440000   2.23661923
  0.94440000   2.23654336
  0.94440000   2.23660047
  0.94440000   2.23655075
  0.94440000   2.23658720
  0.94440000   2.23655447
  0.94440000   2.23657758
  0.94440000   2.23655590
  0.94450000   2.23591399
  0.94450000   2.23792820
  0.94450000   2.23629091
  0.94450000   2.23760382
  0.94450000   2.23653435
  0.94450000   2.23738983
  0.94450000   2.23669103
  0.94450000   2.23724819
  0.94450000   2.23679136
  0.94450000   2.23715398
  0.94450000   2.23685513
  0.94450000   2.23709091
  0.94450000   2.23689522
  0.94450000   2.23704832
  0.94450000   2.23691999
  0.94450000   2.23701922
  0.94450000   2.23693490
  0.94450000   2.23699904
  0.94450000   2.23694348
  0.94450000   2.23698478
  0.94450000   2.23694802
  0.94450000   2.23697447
  0.94450000   2.23695002
  0.94460000   2.23624635
  0.94460000   2.23837589
  0.94460000   2.23663953
  0.94460000   2.23803739
  0.94460000   2.23689540
  0.94460000   2.23781268
  0.94460000   2.23706140
  0.94460000   2.23766306
  0.94460000   2.23716860
  0.94460000   2.23756300
  0.94460000   2.23723737
  0.94460000   2.23749569
  0.94460000   2.23728106
  0.94460000   2.23745006
  0.94460000   2.23730841
  0.94460000   2.23741879
  0.94460000   2.23732515
  0.94460000   2.23739707
  0.94460000   2.23733502
  0.94460000   2.23738174
  0.94460000   2.23734047
  0.94460000   2.23737067
  0.94460000   2.23734310
  0.94470000   2.23657558
  0.94470000   2.23882484
  0.94470000   2.23698521
  0.94470000   2.23847199
  0.94470000   2.23725378
  0.94470000   2.23823628
  0.94470000   2.23742939
  0.94470000   2.23807839
  0.94470000   2.23754374
  0.94470000   2.23797221
  0.94470000   2.23761777
  0.94470000   2.23790044
  0.94470000   2.23766527
  0.94470000   2.23785156
  0.94470000   2.23769537
  0.94470000   2.23781797
  0.94470000   2.23771407
  0.94470000   2.23779460
  0.94470000   2.23772534
  0.94470000   2.23777809
  0.94470000   2.23773179
  0.94470000   2.23776620
  0.94470000   2.23773512
  0.94480000   2.23690173
  0.94480000   2.23927505
  0.94480000   2.23732793
  0.94480000   2.23890765
  0.94480000   2.23760947
  0.94480000   2.23866067
  0.94480000   2.23779497
  0.94480000   2.23849423
  0.94480000   2.23791675
  0.94480000   2.23838168
  0.94480000   2.23799627
  0.94480000   2.23830520
  0.94480000   2.23804781
  0.94480000   2.23825289
  0.94480000   2.23808084
  0.94480000   2.23821682
  0.94480000   2.23810165
  0.94480000   2.23819166
  0.94480000   2.23811444
  0.94480000   2.23817387
  0.94480000   2.23812196
  0.94480000   2.23816107
  0.94480000   2.23812605
  0.94490000   2.23722484
  0.94490000   2.23972649
  0.94490000   2.23766772
  0.94490000   2.23934439
  0.94490000   2.23796242
  0.94490000   2.23908590
  0.94490000   2.23815808
  0.94490000   2.23891065
  0.94490000   2.23828756
  0.94490000   2.23879146
  0.94490000   2.23837284
  0.94490000   2.23871004
  0.94490000   2.23842863
  0.94490000   2.23865410
  0.94490000   2.23846477
  0.94490000   2.23861537
  0.94490000   2.23848785
  0.94490000   2.23858829
  0.94490000   2.23850226
  0.94490000   2.23856912
  0.94490000   2.23851096
  0.94490000   2.23855533
  0.94490000   2.23851589
  0.94500000   2.23754499
  0.94500000   2.24017913
  0.94500000   2.23800458
  0.94500000   2.23978221
  0.94500000   2.23831263
  0.94500000   2.23951200
  0.94500000   2.23851870
  0.94500000   2.23932768
  0.94500000   2.23865613
  0.94500000   2.23920159
  0.94500000   2.23874741
  0.94500000   2.23911500
  0.94500000   2.23880767
  0.94500000   2.23905522
  0.94500000   2.23884712
  0.94500000   2.23901367
  0.94500000   2.23887262
  0.94500000   2.23898454
  0.94500000   2.23888879
  0.94500000   2.23896387
  0.94500000   2.23889876
  0.94500000   2.23894900
  0.94500000   2.23890461
  0.94510000   2.23786228
  0.94510000   2.24063291
  0.94510000   2.23833855
  0.94510000   2.24022111
  0.94510000   2.23866009
  0.94510000   2.23993900
  0.94510000   2.23887679
  0.94510000   2.23974538
  0.94510000   2.23902243
  0.94510000   2.23961215
  0.94510000   2.23911995
  0.94510000   2.23952015
  0.94510000   2.23918491
  0.94510000   2.23945633
  0.94510000   2.23922785
  0.94510000   2.23941178
  0.94510000   2.23925593
  0.94510000   2.23938043
  0.94510000   2.23927400
  0.94510000   2.23935815
  0.94510000   2.23928534
  0.94510000   2.23934211
  0.94510000   2.23929220
  0.94520000   2.23817681
  0.94520000   2.24108775
  0.94520000   2.23866968
  0.94520000   2.24066108
  0.94520000   2.23900482
  0.94520000   2.24036691
  0.94520000   2.23923233
  0.94520000   2.24016377
  0.94520000   2.23938641
  0.94520000   2.24002317
  0.94520000   2.23949041
  0.94520000   2.23992554
  0.94520000   2.23956028
  0.94520000   2.23985747
  0.94520000   2.23960691
  0.94520000   2.23980974
  0.94520000   2.23963773
  0.94520000   2.23977603
  0.94520000   2.23965783
  0.94520000   2.23975201
  0.94520000   2.23967067
  0.94520000   2.23973469
  0.94520000   2.23967862
  0.94530000   2.23848873
  0.94530000   2.24154357
  0.94530000   2.23899804
  0.94530000   2.24110206
  0.94530000   2.23934681
  0.94530000   2.24079574
  0.94530000   2.23958531
  0.94530000   2.24058289
  0.94530000   2.23974804
  0.94530000   2.24043469
  0.94530000   2.23985875
  0.94530000   2.24033121
  0.94530000   2.23993375
  0.94530000   2.24025868
  0.94530000   2.23998426
  0.94530000   2.24020759
  0.94530000   2.24001800
  0.94530000   2.24017137
  0.94530000   2.24004027
  0.94530000   2.24014548
  0.94530000   2.24005472
  0.94530000   2.24012679
  0.94530000   2.24006385
  0.94540000   2.23879821
  0.94540000   2.24200024
  0.94540000   2.23932372
  0.94540000   2.24154402
  0.94540000   2.23968612
  0.94540000   2.24122547
  0.94540000   2.23993572
  0.94540000   2.24100277
  0.94540000   2.24010730
  0.94540000   2.24084677
  0.94540000   2.24022493
  0.94540000   2.24073722
  0.94540000   2.24030527
  0.94540000   2.24066003
  0.94540000   2.24035986
  0.94540000   2.24060540
  0.94540000   2.24039669
  0.94540000   2.24056651
  0.94540000   2.24042128
  0.94540000   2.24053861
  0.94540000   2.24043746
  0.94540000   2.24051843
  0.94540000   2.24044787
  0.94550000   2.23910544
  0.94550000   2.24245762
  0.94550000   2.23964684
  0.94550000   2.24198687
  0.94550000   2.24002280
  0.94550000   2.24165609
  0.94550000   2.24028359
  0.94550000   2.24142340
  0.94550000   2.24046417
  0.94550000   2.24125942
  0.94550000   2.24058891
  0.94550000   2.24114361
  0.94550000   2.24067480
  0.94550000   2.24106156
  0.94550000   2.24073366
  0.94550000   2.24100320
  0.94550000   2.24077375
  0.94550000   2.24096148
  0.94550000   2.24080080
  0.94550000   2.24093145
  0.94550000   2.24081884
  0.94550000   2.24090966
  0.94550000   2.24083064
  0.94560000   2.23941066
  0.94560000   2.24291552
  0.94560000   2.23996753
  0.94560000   2.24243052
  0.94560000   2.24035693
  0.94560000   2.24208756
  0.94560000   2.24062893
  0.94560000   2.24184479
  0.94560000   2.24081865
  0.94560000   2.24167268
  0.94560000   2.24095069
  0.94560000   2.24155041
  0.94560000   2.24104231
  0.94560000   2.24146332
  0.94560000   2.24110562
  0.94560000   2.24140105
  0.94560000   2.24114914
  0.94560000   2.24135633
  0.94560000   2.24117882
  0.94560000   2.24132402
  0.94560000   2.24119884
  0.94560000   2.24130051
  0.94560000   2.24121214
  0.94570000   2.23971414
  0.94570000   2.24337375
  0.94570000   2.24028597
  0.94570000   2.24287483
  0.94570000   2.24068859
  0.94570000   2.24251980
  0.94570000   2.24097180
  0.94570000   2.24226691
  0.94570000   2.24117075
  0.94570000   2.24208655
  0.94570000   2.24131023
  0.94570000   2.24195766
  0.94570000   2.24140776
  0.94570000   2.24186534
  0.94570000   2.24147572
  0.94570000   2.24179899
  0.94570000   2.24152284
  0.94570000   2.24175112
  0.94570000   2.24155528
  0.94570000   2.24171639
  0.94570000   2.24157743
  0.94570000   2.24169103
  0.94570000   2.24159234
  0.94580000   2.24001617
  0.94580000   2.24383205
  0.94580000   2.24060237
  0.94580000   2.24331966
  0.94580000   2.24101792
  0.94580000   2.24295273
  0.94580000   2.24131225
  0.94580000   2.24268974
  0.94580000   2.24152048
  0.94580000   2.24250102
  0.94580000   2.24166753
  0.94580000   2.24236538
  0.94580000   2.24177114
  0.94580000   2.24226766
  0.94580000   2.24184390
  0.94580000   2.24219707
  0.94580000   2.24189479
  0.94580000   2.24214588
  0.94580000   2.24193016
  0.94580000   2.24210859
  0.94580000   2.24195456
  0.94580000   2.24208126
  0.94580000   2.24197119
  0.94590000   2.24031713
  0.94590000   2.24429014
  0.94590000   2.24091696
  0.94590000   2.24376481
  0.94590000   2.24134507
  0.94590000   2.24338623
  0.94590000   2.24165039
  0.94590000   2.24311321
  0.94590000   2.24186790
  0.94590000   2.24291609
  0.94590000   2.24202262
  0.94590000   2.24277357
  0.94590000   2.24213243
  0.94590000   2.24267032
  0.94590000   2.24221016
  0.94590000   2.24259532
  0.94590000   2.24226497
  0.94590000   2.24254066
  0.94590000   2.24230341
  0.94590000   2.24250066
  0.94590000   2.24233020
  0.94590000   2.24247123
  0.94590000   2.24234868
  0.94600000   2.24061739
  0.94600000   2.24474769
  0.94600000   2.24123003
  0.94600000   2.24421006
  0.94600000   2.24167023
  0.94600000   2.24382017
  0.94600000   2.24198631
  0.94600000   2.24353724
  0.94600000   2.24221306
  0.94600000   2.24333172
  0.94600000   2.24237549
  0.94600000   2.24318224
  0.94600000   2.24249163
  0.94600000   2.24307331
  0.94600000   2.24257447
  0.94600000   2.24299376
  0.94600000   2.24263334
  0.94600000   2.24293549
  0.94600000   2.24267501
  0.94600000   2.24289265
  0.94600000   2.24270431
  0.94600000   2.24286100
  0.94600000   2.24272475
  0.94610000   2.24091742
  0.94610000   2.24520432
  0.94610000   2.24154191
  0.94610000   2.24465515
  0.94610000   2.24199363
  0.94610000   2.24425437
  0.94610000   2.24232018
  0.94610000   2.24396173
  0.94610000   2.24255606
  0.94610000   2.24374785
  0.94610000   2.24272621
  0.94610000   2.24359136
  0.94610000   2.24284876
  0.94610000   2.24347666
  0.94610000   2.24293681
  0.94610000   2.24339243
  0.94610000   2.24299990
  0.94610000   2.24333041
  0.94610000   2.24304492
  0.94610000   2.24328459
  0.94610000   2.24307687
  0.94610000   2.24325059
  0.94610000   2.24309939
  0.94620000   2.24121773
  0.94620000   2.24565961
  0.94620000   2.24185297
  0.94620000   2.24509975
  0.94620000   2.24231553
  0.94620000   2.24468861
  0.94620000   2.24265218
  0.94620000   2.24438653
  0.94620000   2.24289700
  0.94620000   2.24416440
  0.94620000   2.24307484
  0.94620000   2.24400089
  0.94620000   2.24320383
  0.94620000   2.24388036
  0.94620000   2.24329721
  0.94620000   2.24379134
  0.94620000   2.24336462
  0.94620000   2.24372544
  0.94620000   2.24341311
  0.94620000   2.24367652
  0.94620000   2.24344785
  0.94620000   2.24364005
  0.94620000   2.24347257
  0.94630000   2.24151887
  0.94630000   2.24611308
  0.94630000   2.24216365
  0.94630000   2.24554352
  0.94630000   2.24263626
  0.94630000   2.24512263
  0.94630000   2.24298252
  0.94630000   2.24481146
  0.94630000   2.24323604
  0.94630000   2.24458125
  0.94630000   2.24342147
  0.94630000   2.24441077
  0.94630000   2.24355691
  0.94630000   2.24428437
  0.94630000   2.24365566
  0.94630000   2.24419048
  0.94630000   2.24372750
  0.94630000   2.24412060
  0.94630000   2.24377959
  0.94630000   2.24406846
  0.94630000   2.24381721
  0.94630000   2.24402941
  0.94630000   2.24384425
  0.94640000   2.24182148
  0.94640000   2.24656418
  0.94640000   2.24247443
  0.94640000   2.24598603
  0.94640000   2.24295617
  0.94640000   2.24555613
  0.94640000   2.24331148
  0.94640000   2.24523632
  0.94640000   2.24357336
  0.94640000   2.24499827
  0.94640000   2.24376621
  0.94640000   2.24482092
  0.94640000   2.24390806
  0.94640000   2.24468865
  0.94640000   2.24401222
  0.94640000   2.24458984
  0.94640000   2.24408855
  0.94640000   2.24451590
  0.94640000   2.24414434
  0.94640000   2.24446042
  0.94640000   2.24418496
  0.94640000   2.24441869
  0.94640000   2.24421441
  0.94650000   2.24212628
  0.94650000   2.24701228
  0.94650000   2.24278587
  0.94650000   2.24642681
  0.94650000   2.24327570
  0.94650000   2.24598874
  0.94650000   2.24363936
  0.94650000   2.24566084
  0.94650000   2.24390919
  0.94650000   2.24541527
  0.94650000   2.24410923
  0.94650000   2.24523122
  0.94650000   2.24425738
  0.94650000   2.24509312
  0.94650000   2.24436694
  0.94650000   2.24498938
  0.94650000   2.24444781
  0.94650000   2.24491131
  0.94650000   2.24450736
  0.94650000   2.24485243
  0.94650000   2.24455108
  0.94650000   2.24480791
  0.94650000   2.24458304
  0.94660000   2.24243403
  0.94660000   2.24745672
  0.94660000   2.24309859
  0.94660000   2.24686532
  0.94660000   2.24359534
  0.94660000   2.24642005
  0.94660000   2.24396654
  0.94660000   2.24608471
  0.94660000   2.24424380
  0.94660000   2.24583203
  0.94660000   2.24445073
  0.94660000   2.24564150
  0.94660000   2.24460502
  0.94660000   2.24549770
  0.94660000   2.24471991
  0.94660000   2.24538904
  0.94660000   2.24480533
  0.94660000   2.24530681
  0.94660000   2.24486869
  0.94660000   2.24524446
  0.94660000   2.24491557
  0.94660000   2.24519708
  0.94660000   2.24495013
  0.94670000   2.24274561
  0.94670000   2.24789672
  0.94670000   2.24341331
  0.94670000   2.24730093
  0.94670000   2.24391564
  0.94670000   2.24684958
  0.94670000   2.24429346
  0.94670000   2.24650755
  0.94670000   2.24457752
  0.94670000   2.24624826
  0.94670000   2.24479093
  0.94670000   2.24605157
  0.94670000   2.24495113
  0.94670000   2.24590223
  0.94670000   2.24507124
  0.94670000   2.24578873
  0.94670000   2.24516117
  0.94670000   2.24570235
  0.94670000   2.24522837
  0.94670000   2.24563650
  0.94670000   2.24527846
  0.94670000   2.24558619
  0.94670000   2.24531569
  0.94680000   2.24306196
  0.94680000   2.24833143
  0.94680000   2.24373080
  0.94680000   2.24773295
  0.94680000   2.24423724
  0.94680000   2.24727676
  0.94680000   2.24462062
  0.94680000   2.24692894
  0.94680000   2.24491074
  0.94680000   2.24666365
  0.94680000   2.24513014
  0.94680000   2.24646118
  0.94680000   2.24529594
  0.94680000   2.24630655
  0.94680000   2.24542110
  0.94680000   2.24618834
  0.94680000   2.24551545
  0.94680000   2.24609786
  0.94680000   2.24558646
  0.94680000   2.24602850
  0.94680000   2.24563979
  0.94680000   2.24597523
  0.94680000   2.24567973
  0.94690000   2.24338414
  0.94690000   2.24875992
  0.94690000   2.24405196
  0.94690000   2.24816061
  0.94690000   2.24456086
  0.94690000   2.24770097
  0.94690000   2.24494860
  0.94690000   2.24734837
  0.94690000   2.24524391
  0.94690000   2.24707778
  0.94690000   2.24546871
  0.94690000   2.24687004
  0.94690000   2.24563971
  0.94690000   2.24671043
  0.94690000   2.24576966
  0.94690000   2.24658769
  0.94690000   2.24586830
  0.94690000   2.24649321
  0.94690000   2.24594306
  0.94690000   2.24642038
  0.94690000   2.24599962
  0.94690000   2.24636414
  0.94690000   2.24604229
  0.94700000   2.24371330
  0.94700000   2.24918114
  0.94700000   2.24437774
  0.94700000   2.24858302
  0.94700000   2.24488732
  0.94700000   2.24812147
  0.94700000   2.24527806
  0.94700000   2.24776524
  0.94700000   2.24557758
  0.94700000   2.24749021
  0.94700000   2.24580706
  0.94700000   2.24727777
  0.94700000   2.24598277
  0.94700000   2.24711359
  0.94700000   2.24611719
  0.94700000   2.24698659
  0.94700000   2.24621991
  0.94700000   2.24688826
  0.94700000   2.24629831
  0.94700000   2.24681204
  0.94700000   2.24635803
  0.94700000   2.24675287
  0.94700000   2.24640344
  0.94710000   2.24405069
  0.94710000   2.24959394
  0.94710000   2.24470924
  0.94710000   2.24899920
  0.94710000   2.24521752
  0.94710000   2.24853745
  0.94710000   2.24560976
  0.94710000   2.24817889
  0.94710000   2.24591236
  0.94710000   2.24790038
  0.94710000   2.24614569
  0.94710000   2.24768396
  0.94710000   2.24632551
  0.94710000   2.24751569
  0.94710000   2.24646399
  0.94710000   2.24738477
  0.94710000   2.24657051
  0.94710000   2.24728282
  0.94710000   2.24665237
  0.94710000   2.24720335
  0.94710000   2.24671517
  0.94710000   2.24714130
  0.94710000   2.24676326
  0.94720000   2.24439768
  0.94720000   2.24999707
  0.94720000   2.24504766
  0.94720000   2.24940806
  0.94720000   2.24555250
  0.94720000   2.24894798
  0.94720000   2.24594457
  0.94720000   2.24858854
  0.94720000   2.24624896
  0.94720000   2.24830765
  0.94720000   2.24648518
  0.94720000   2.24808807
  0.94720000   2.24666841
  0.94720000   2.24791633
  0.94720000   2.24681042
  0.94720000   2.24778192
  0.94720000   2.24692040
  0.94720000   2.24767664
  0.94720000   2.24700547
  0.94720000   2.24759410
  0.94720000   2.24707119
  0.94720000   2.24752931
  0.94720000   2.24712188
  0.94730000   2.24475577
  0.94730000   2.25038913
  0.94730000   2.24539431
  0.94730000   2.24980839
  0.94730000   2.24589341
  0.94730000   2.24935201
  0.94730000   2.24628345
  0.94730000   2.24899330
  0.94730000   2.24658820
  0.94730000   2.24871129
  0.94730000   2.24682621
  0.94730000   2.24848951
  0.94730000   2.24701200
  0.94730000   2.24831501
  0.94730000   2.24715694
  0.94730000   2.24817764
  0.94730000   2.24726992
  0.94730000   2.24806941
  0.94730000   2.24735790
  0.94730000   2.24798406
  0.94730000   2.24742632
  0.94730000   2.24791670
  0.94730000   2.24747946
  0.94740000   2.24512659
  0.94740000   2.25076862
  0.94740000   2.24575065
  0.94740000   2.25019885
  0.94740000   2.24624150
  0.94740000   2.24974838
  0.94740000   2.24662752
  0.94740000   2.24939217
  0.94740000   2.24693103
  0.94740000   2.24911045
  0.94740000   2.24716957
  0.94740000   2.24888756
  0.94740000   2.24735696
  0.94740000   2.24871115
  0.94740000   2.24750409
  0.94740000   2.24857144
  0.94740000   2.24761952
  0.94740000   2.24846073
  0.94740000   2.24771000
  0.94740000   2.24837294
  0.94740000   2.24778084
  0.94740000   2.24830324
  0.94740000   2.24783623
  0.94750000   2.24551190
  0.94750000   2.25113389
  0.94750000   2.24611827
  0.94750000   2.25057795
  0.94750000   2.24659821
  0.94750000   2.25013577
  0.94750000   2.24697802
  0.94750000   2.24978402
  0.94750000   2.24727851
  0.94750000   2.24950415
  0.94750000   2.24751617
  0.94750000   2.24928140
  0.94750000   2.24770405
  0.94750000   2.24910404
  0.94750000   2.24785250
  0.94750000   2.24896276
  0.94750000   2.24796972
  0.94750000   2.24885015
  0.94750000   2.24806219
  0.94750000   2.24876033
  0.94750000   2.24813508
  0.94750000   2.24868862
  0.94750000   2.24819245
  0.94760000   2.24591360
  0.94760000   2.25148312
  0.94760000   2.24649892
  0.94760000   2.25094406
  0.94760000   2.24696509
  0.94760000   2.25051274
  0.94760000   2.24733631
  0.94760000   2.25016757
  0.94760000   2.24763185
  0.94760000   2.24989128
  0.94760000   2.24786705
  0.94760000   2.24967007
  0.94760000   2.24805416
  0.94760000   2.24949289
  0.94760000   2.24820293
  0.94760000   2.24935092
  0.94760000   2.24832115
  0.94760000   2.24923709
  0.94760000   2.24841502
  0.94760000   2.24914578
  0.94760000   2.24848949
  0.94760000   2.24907245
  0.94760000   2.24854849
  0.94770000   2.24633375
  0.94770000   2.25181436
  0.94770000   2.24689449
  0.94770000   2.25129539
  0.94770000   2.24734388
  0.94770000   2.25087765
  0.94770000   2.24770396
  0.94770000   2.25054136
  0.94770000   2.24799241
  0.94770000   2.25027057
  0.94770000   2.24822341
  0.94770000   2.25005247
  0.94770000   2.24840832
  0.94770000   2.24987675
  0.94770000   2.24855627
  0.94770000   2.24973511
  0.94770000   2.24867457
  0.94770000   2.24962088
  0.94770000   2.24876911
  0.94770000   2.24952871
  0.94770000   2.24884458
  0.94770000   2.24945427
  0.94770000   2.24890478
  0.94780000   2.24677456
  0.94780000   2.25212548
  0.94780000   2.24730706
  0.94780000   2.25162995
  0.94780000   2.24773647
  0.94780000   2.25122872
  0.94780000   2.24808269
  0.94780000   2.25090379
  0.94780000   2.24836175
  0.94780000   2.25064059
  0.94780000   2.24858661
  0.94780000   2.25042734
  0.94780000   2.24876773
  0.94780000   2.25025451
  0.94780000   2.24891354
  0.94780000   2.25011437
  0.94780000   2.24903087
  0.94780000   2.25000070
  0.94780000   2.24912521
  0.94780000   2.24990843
  0.94780000   2.24920101
  0.94780000   2.24983350
  0.94780000   2.24926186
  0.94790000   2.24723839
  0.94790000   2.25241419
  0.94790000   2.24773887
  0.94790000   2.25194561
  0.94790000   2.24814496
  0.94790000   2.25156396
  0.94790000   2.24847440
  0.94790000   2.25125305
  0.94790000   2.24874158
  0.94790000   2.25099971
  0.94790000   2.24895819
  0.94790000   2.25079324
  0.94790000   2.24913374
  0.94790000   2.25062490
  0.94790000   2.24927594
  0.94790000   2.25048761
  0.94790000   2.24939107
  0.94790000   2.25037559
  0.94790000   2.24948423
  0.94790000   2.25028413
  0.94790000   2.24955955
  0.94790000   2.25020942
  0.94790000   2.24962039
  0.94800000   2.24772781
  0.94800000   2.25267799
  0.94800000   2.24819235
  0.94800000   2.25224001
  0.94800000   2.24857163
  0.94800000   2.25188118
  0.94800000   2.24888122
  0.94800000   2.25158713
  0.94800000   2.24913384
  0.94800000   2.25134612
  0.94800000   2.24933990
  0.94800000   2.25114852
  0.94800000   2.24950792
  0.94800000   2.25098647
  0.94800000   2.24964486
  0.94800000   2.25085353
  0.94800000   2.24975641
  0.94800000   2.25074441
  0.94800000   2.24984723
  0.94800000   2.25065480
  0.94800000   2.24992111
  0.94800000   2.25058118
  0.94800000   2.24998117
  0.94810000   2.24824550
  0.94810000   2.25291420
  0.94810000   2.24867013
  0.94810000   2.25251058
  0.94810000   2.24901898
  0.94810000   2.25217797
  0.94810000   2.24930547
  0.94810000   2.25190380
  0.94810000   2.24954068
  0.94810000   2.25167775
  0.94810000   2.24973371
  0.94810000   2.25149133
  0.94810000   2.24989205
  0.94810000   2.25133754
  0.94810000   2.25002190
  0.94810000   2.25121062
  0.94810000   2.25012831
  0.94810000   2.25110584
  0.94810000   2.25021547
  0.94810000   2.25101929
  0.94810000   2.25028681
  0.94810000   2.25094776
  0.94810000   2.25034516
  0.94820000   2.24879438
  0.94820000   2.25311996
  0.94820000   2.24917504
  0.94820000   2.25275456
  0.94820000   2.24948971
  0.94820000   2.25245169
  0.94820000   2.24974973
  0.94820000   2.25220057
  0.94820000   2.24996449
  0.94820000   2.25199232
  0.94820000   2.25014181
  0.94820000   2.25181956
  0.94820000   2.25028815
  0.94820000   2.25167619
  0.94820000   2.25040887
  0.94820000   2.25155718
  0.94820000   2.25050840
  0.94820000   2.25145834
  0.94820000   2.25059041
  0.94820000   2.25137622
  0.94820000   2.25065795
  0.94820000   2.25130794
  0.94820000   2.25071351
  0.94830000   2.24937748
  0.94830000   2.25329216
  0.94830000   2.24971011
  0.94830000   2.25296892
  0.94830000   2.24998678
  0.94830000   2.25269945
  0.94830000   2.25021679
  0.94830000   2.25247473
  0.94830000   2.25040793
  0.94830000   2.25228727
  0.94830000   2.25056669
  0.94830000   2.25213084
  0.94830000   2.25069850
  0.94830000   2.25200026
  0.94830000   2.25080787
  0.94830000   2.25189121
  0.94830000   2.25089859
  0.94830000   2.25180011
  0.94830000   2.25097377
  0.94830000   2.25172396
  0.94830000   2.25103605
  0.94830000   2.25166028
  0.94830000   2.25108760
  0.94840000   2.24999805
  0.94840000   2.25342751
  0.94840000   2.25027857
  0.94840000   2.25315043
  0.94840000   2.25051336
  0.94840000   2.25291812
  0.94840000   2.25070974
  0.94840000   2.25272326
  0.94840000   2.25087392
  0.94840000   2.25255976
  0.94840000   2.25101110
  0.94840000   2.25242251
  0.94840000   2.25112566
  0.94840000   2.25230727
  0.94840000   2.25122128
  0.94840000   2.25221045
  0.94840000   2.25130104
  0.94840000   2.25212908
  0.94840000   2.25136753
  0.94840000   2.25206065
  0.94840000   2.25142292
  0.94840000   2.25200308
  0.94840000   2.25146903
  0.94850000   2.25065951
  0.94850000   2.25352249
  0.94850000   2.25088389
  0.94850000   2.25329558
  0.94850000   2.25107287
  0.94850000   2.25310425
  0.94850000   2.25123192
  0.94850000   2.25294285
  0.94850000   2.25136567
  0.94850000   2.25280663
  0.94850000   2.25147809
  0.94850000   2.25269160
  0.94850000   2.25157252
  0.94850000   2.25259443
  0.94850000   2.25165177
  0.94850000   2.25251230
  0.94850000   2.25171826
  0.94850000   2.25244285
  0.94850000   2.25177399
  0.94850000   2.25238409
  0.94850000   2.25182066
  0.94850000   2.25233434
  0.94850000   2.25185972
  0.94860000   2.25136542
  0.94860000   2.25357335
  0.94860000   2.25152972
  0.94860000   2.25340061
  0.94860000   2.25166900
  0.94860000   2.25325415
  0.94860000   2.25178695
  0.94860000   2.25312989
  0.94860000   2.25188672
  0.94860000   2.25302440
  0.94860000   2.25197106
  0.94860000   2.25293478
  0.94860000   2.25204229
  0.94860000   2.25285861
  0.94860000   2.25210240
  0.94860000   2.25279383
  0.94860000   2.25215308
  0.94860000   2.25273869
  0.94860000   2.25219577
  0.94860000   2.25269174
  0.94860000   2.25223171
  0.94860000   2.25265173
  0.94860000   2.25226192
  0.94870000   2.25211951
  0.94870000   2.25357613
  0.94870000   2.25221995
  0.94870000   2.25346149
  0.94870000   2.25230568
  0.94870000   2.25336379
  0.94870000   2.25237874
  0.94870000   2.25328043
  0.94870000   2.25244091
  0.94870000   2.25320924
  0.94870000   2.25249373
  0.94870000   2.25314837
  0.94870000   2.25253856
  0.94870000   2.25309630
  0.94870000   2.25257655
  0.94870000   2.25305170
  0.94870000   2.25260872
  0.94870000   2.25301348
  0.94870000   2.25263591
  0.94870000   2.25298069
  0.94870000   2.25265887
  0.94870000   2.25295253
  0.94870000   2.25267821
  0.94880000   2.25292567
  0.94880000   2.25352665
  0.94880000   2.25295864
  0.94880000   2.25347395
  0.94880000   2.25298709
  0.94880000   2.25342886
  0.94880000   2.25301153
  0.94880000   2.25339018
  0.94880000   2.25303242
  0.94880000   2.25335693
  0.94880000   2.25305021
  0.94880000   2.25332828
  0.94880000   2.25306531
  0.94880000   2.25330355
  0.94880000   2.25307807
  0.94880000   2.25328217
  0.94880000   2.25308882
  0.94880000   2.25326365
  0.94880000   2.25309784
  0.94880000   2.25324759
  0.94880000   2.25310538
  0.94880000   2.25323362
  0.94880000   2.25311165
  0.94890000   2.25378789
  0.94890000   2.25342050
  0.94890000   2.25375005
  0.94890000   2.25343342
  0.94890000   2.25371766
  0.94890000   2.25344472
  0.94890000   2.25368982
  0.94890000   2.25345450
  0.94890000   2.25366579
  0.94890000   2.25346288
  0.94890000   2.25364498
  0.94890000   2.25347000
  0.94890000   2.25362692
  0.94890000   2.25347600
  0.94890000   2.25361120
  0.94890000   2.25348102
  0.94890000   2.25359748
  0.94890000   2.25348518
  0.94890000   2.25358549
  0.94890000   2.25348859
  0.94890000   2.25357497
  0.94890000   2.25349136
  0.94890000   2.25356573
  0.94900000   2.25471029
  0.94900000   2.25325309
  0.94900000   2.25459863
  0.94900000   2.25333509
  0.94900000   2.25450206
  0.94900000   2.25340642
  0.94900000   2.25441841
  0.94900000   2.25346836
  0.94900000   2.25434588
  0.94900000   2.25352206
  0.94900000   2.25428292
  0.94900000   2.25356856
  0.94900000   2.25422822
  0.94900000   2.25360878
  0.94900000   2.25418067
  0.94900000   2.25364352
  0.94900000   2.25413929
  0.94900000   2.25367350
  0.94900000   2.25410326
  0.94900000   2.25369934
  0.94900000   2.25407186
  0.94900000   2.25372159
  0.94900000   2.25404448
  0.94910000   2.25569705
  0.94910000   2.25301962
  0.94910000   2.25550896
  0.94910000   2.25317388
  0.94910000   2.25534516
  0.94910000   2.25330869
  0.94910000   2.25520242
  0.94910000   2.25342639
  0.94910000   2.25507793
  0.94910000   2.25352905
  0.94910000   2.25496931
  0.94910000   2.25361855
  0.94910000   2.25487449
  0.94910000   2.25369652
  0.94910000   2.25479169
  0.94910000   2.25376442
  0.94910000   2.25471935
  0.94910000   2.25382350
  0.94910000   2.25465613
  0.94910000   2.25387489
  0.94910000   2.25460086
  0.94910000   2.25391956
  0.94910000   2.25455251
  0.94920000   2.25675241
  0.94920000   2.25271514
  0.94920000   2.25648574
  0.94920000   2.25294449
  0.94920000   2.25625206
  0.94920000   2.25314596
  0.94920000   2.25604719
  0.94920000   2.25332282
  0.94920000   2.25586749
  0.94920000   2.25347798
  0.94920000   2.25570983
  0.94920000   2.25361406
  0.94920000   2.25557147
  0.94920000   2.25373334
  0.94920000   2.25545000
  0.94920000   2.25383788
  0.94920000   2.25534335
  0.94920000   2.25392945
  0.94920000   2.25524968
  0.94920000   2.25400965
  0.94920000   2.25516740
  0.94920000   2.25407986
  0.94920000   2.25509510
  0.94930000   2.25788062
  0.94930000   2.25233453
  0.94930000   2.25753377
  0.94930000   2.25264139
  0.94930000   2.25722799
  0.94930000   2.25291236
  0.94930000   2.25695834
  0.94930000   2.25315153
  0.94930000   2.25672046
  0.94930000   2.25336254
  0.94930000   2.25651057
  0.94930000   2.25354866
  0.94930000   2.25632534
  0.94930000   2.25371278
  0.94930000   2.25616185
  0.94930000   2.25385746
  0.94930000   2.25601752
  0.94930000   2.25398498
  0.94930000   2.25589009
  0.94930000   2.25409735
  0.94930000   2.25577757
  0.94930000   2.25419636
  0.94930000   2.25567820
  0.94940000   2.25908587
  0.94940000   2.25187258
  0.94940000   2.25865786
  0.94940000   2.25225886
  0.94940000   2.25827833
  0.94940000   2.25260176
  0.94940000   2.25794168
  0.94940000   2.25290605
  0.94940000   2.25764301
  0.94940000   2.25317602
  0.94940000   2.25737799
  0.94940000   2.25341547
  0.94940000   2.25714278
  0.94940000   2.25362782
  0.94940000   2.25693403
  0.94940000   2.25381610
  0.94940000   2.25674872
  0.94940000   2.25398303
  0.94940000   2.25658422
  0.94940000   2.25413099
  0.94940000   2.25643818
  0.94940000   2.25426213
  0.94940000   2.25630851
  0.94950000   2.26037227
  0.94950000   2.25132401
  0.94950000   2.25986283
  0.94950000   2.25179103
  0.94950000   2.25940849
  0.94950000   2.25220779
  0.94950000   2.25900319
  0.94950000   2.25257960
  0.94950000   2.25864157
  0.94950000   2.25291127
  0.94950000   2.25831887
  0.94950000   2.25320707
  0.94950000   2.25803088
  0.94950000   2.25347086
  0.94950000   2.25777384
  0.94950000   2.25370608
  0.94950000   2.25754441
  0.94950000   2.25391580
  0.94950000   2.25733961
  0.94950000   2.25410277
  0.94950000   2.25715678
  0.94950000   2.25426945
  0.94950000   2.25699357
  0.94960000   2.26174379
  0.94960000   2.25068353
  0.94960000   2.26115341
  0.94960000   2.25123195
  0.94960000   2.26062392
  0.94960000   2.25172389
  0.94960000   2.26014894
  0.94960000   2.25216511
  0.94960000   2.25972276
  0.94960000   2.25256078
  0.94960000   2.25934033
  0.94960000   2.25291560
  0.94960000   2.25899712
  0.94960000   2.25323375
  0.94960000   2.25868909
  0.94960000   2.25351902
  0.94960000   2.25841261
  0.94960000   2.25377479
  0.94960000   2.25816445
  0.94960000   2.25400411
  0.94960000   2.25794168
  0.94960000   2.25420969
  0.94960000   2.25774172
  0.94970000   2.26320415
  0.94970000   2.24994587
  0.94970000   2.26253416
  0.94970000   2.25057562
  0.94970000   2.26192999
  0.94970000   2.25114339
  0.94970000   2.26138502
  0.94970000   2.25165527
  0.94970000   2.26089334
  0.94970000   2.25211673
  0.94970000   2.26044970
  0.94970000   2.25253275
  0.94970000   2.26004934
  0.94970000   2.25290781
  0.94970000   2.25968803
  0.94970000   2.25324593
  0.94970000   2.25936193
  0.94970000   2.25355075
  0.94970000   2.25906761
  0.94970000   2.25382556
  0.94970000   2.25880195
  0.94970000   2.25407331
  0.94970000   2.25856216
  0.94980000   2.26475680
  0.94980000   2.24910587
  0.94980000   2.26400944
  0.94980000   2.24981606
  0.94980000   2.26333189
  0.94980000   2.25045954
  0.94980000   2.26271744
  0.94980000   2.25104263
  0.94980000   2.26216008
  0.94980000   2.25157102
  0.94980000   2.26165443
  0.94980000   2.25204987
  0.94980000   2.26119562
  0.94980000   2.25248385
  0.94980000   2.26077929
  0.94980000   2.25287719
  0.94980000   2.26040147
  0.94980000   2.25323372
  0.94980000   2.26005858
  0.94980000   2.25355689
  0.94980000   2.25974739
  0.94980000   2.25384984
  0.94980000   2.25946495
  0.94990000   2.26640482
  0.94990000   2.24815860
  0.94990000   2.26558325
  0.94990000   2.24894742
  0.94990000   2.26483457
  0.94990000   2.24966564
  0.94990000   2.26415206
  0.94990000   2.25031968
  0.94990000   2.26352968
  0.94990000   2.25091536
  0.94990000   2.26296203
  0.94990000   2.25145797
  0.94990000   2.26244420
  0.94990000   2.25195229
  0.94990000   2.26197177
  0.94990000   2.25240267
  0.94990000   2.26154072
  0.94990000   2.25281307
  0.94990000   2.26114739
  0.94990000   2.25318706
  0.94990000   2.26078847
  0.94990000   2.25352790
  0.94990000   2.26046092
  0.95000000   2.26815081
  0.95000000   2.24709935
  0.95000000   2.26725918
  0.95000000   2.24796408
  0.95000000   2.26644259
  0.95000000   2.24875513
  0.95000000   2.26569439
  0.95000000   2.24947896
  0.95000000   2.26500861
  0.95000000   2.25014144
  0.95000000   2.26437988
  0.95000000   2.25074792
  0.95000000   2.26380332
  0.95000000   2.25130323
  0.95000000   2.26327452
  0.95000000   2.25181178
  0.95000000   2.26278947
  0.95000000   2.25227759
  0.95000000   2.26234448
  0.95000000   2.25270431
  0.95000000   2.26193624
  0.95000000   2.25309526
  0.95000000   2.26156167
  0.95010000   2.26999688
  0.95010000   2.24592380
  0.95010000   2.26904028
  0.95010000   2.24686072
  0.95010000   2.26816000
  0.95010000   2.24772169
  0.95010000   2.26734952
  0.95010000   2.24851316
  0.95010000   2.26660298
  0.95010000   2.24924100
  0.95010000   2.26591508
  0.95010000   2.24991053
  0.95010000   2.26528106
  0.95010000   2.25052661
  0.95010000   2.26469655
  0.95010000   2.25109363
  0.95010000   2.26415759
  0.95010000   2.25161563
  0.95010000   2.26366057
  0.95010000   2.25209627
  0.95010000   2.26320216
  0.95010000   2.25253891
  0.95010000   2.26277932
  0.95020000   2.27194447
  0.95020000   2.24462813
  0.95020000   2.27092896
  0.95020000   2.24563249
  0.95020000   2.26999024
  0.95020000   2.24655943
  0.95020000   2.26912194
  0.95020000   2.24741534
  0.95020000   2.26831833
  0.95020000   2.24820603
  0.95020000   2.26757428
  0.95020000   2.24893678
  0.95020000   2.26688512
  0.95020000   2.24961238
  0.95020000   2.26624660
  0.95020000   2.25023721
  0.95020000   2.26565487
  0.95020000   2.25081525
  0.95020000   2.26510638
  0.95020000   2.25135014
  0.95020000   2.26459789
  0.95020000   2.25184522
  0.95020000   2.26412641
  0.95030000   2.27399433
  0.95030000   2.24320906
  0.95030000   2.27292688
  0.95030000   2.24427510
  0.95030000   2.27193596
  0.95030000   2.24526299
  0.95030000   2.27101535
  0.95030000   2.24617903
  0.95030000   2.27015950
  0.95030000   2.24702895
  0.95030000   2.26936342
  0.95030000   2.24781795
  0.95030000   2.26862260
  0.95030000   2.24855073
  0.95030000   2.26793293
  0.95030000   2.24923160
  0.95030000   2.26729068
  0.95030000   2.24986446
  0.95030000   2.26669241
  0.95030000   2.25045291
  0.95030000   2.26613500
  0.95030000   2.25100022
  0.95030000   2.26561554
  0.95040000   2.27614644
  0.95040000   2.24166401
  0.95040000   2.27503486
  0.95040000   2.24278498
  0.95040000   2.27399891
  0.95040000   2.24382773
  0.95040000   2.27303254
  0.95040000   2.24479848
  0.95040000   2.27213035
  0.95040000   2.24570286
  0.95040000   2.27128753
  0.95040000   2.24654594
  0.95040000   2.27049972
  0.95040000   2.24733235
  0.95040000   2.26976297
  0.95040000   2.24806628
  0.95040000   2.26907368
  0.95040000   2.24875156
  0.95040000   2.26842856
  0.95040000   2.24939168
  0.95040000   2.26782460
  0.95040000   2.24998984
  0.95040000   2.26725903
  0.95050000   2.27839991
  0.95050000   2.23999120
  0.95050000   2.27725276
  0.95050000   2.24115941
  0.95050000   2.27617981
  0.95050000   2.24224992
  0.95050000   2.27517517
  0.95050000   2.24326885
  0.95050000   2.27423361
  0.95050000   2.24422172
  0.95050000   2.27335046
  0.95050000   2.24511351
  0.95050000   2.27252153
  0.95050000   2.24594872
  0.95050000   2.27174301
  0.95050000   2.24673146
  0.95050000   2.27101146
  0.95050000   2.24746543
  0.95050000   2.27032373
  0.95050000   2.24815403
  0.95050000   2.26967694
  0.95050000   2.24880037
  0.95050000   2.26906844
  0.95060000   2.28075298
  0.95060000   2.23818974
  0.95060000   2.27957940
  0.95060000   2.23939665
  0.95060000   2.27847820
  0.95060000   2.24052685
  0.95060000   2.27744364
  0.95060000   2.24158638
  0.95060000   2.27647063
  0.95060000   2.24258066
  0.95060000   2.27555463
  0.95060000   2.24351457
  0.95060000   2.27469159
  0.95060000   2.24439250
  0.95060000   2.27387785
  0.95060000   2.24521845
  0.95060000   2.27311011
  0.95060000   2.24599602
  0.95060000   2.27238536
  0.95060000   2.24672850
  0.95060000   2.27170085
  0.95060000   2.24741890
  0.95060000   2.27105406
  0.95070000   2.28320292
  0.95070000   2.23625972
  0.95070000   2.28201250
  0.95070000   2.23749607
  0.95070000   2.28089240
  0.95070000   2.23865706
  0.95070000   2.27983697
  0.95070000   2.23974866
  0.95070000   2.27884124
  0.95070000   2.24077621
  0.95070000   2.27790080
  0.95070000   2.24174449
  0.95070000   2.27701172
  0.95070000   2.24265782
  0.95070000   2.27617046
  0.95070000   2.24352007
  0.95070000   2.27537384
  0.95070000   2.24433477
  0.95070000   2.27461897
  0.95070000   2.24510510
  0.95070000   2.27390324
  0.95070000   2.24583396
  0.95070000   2.27322423
  0.95080000   2.28574605
  0.95080000   2.23420232
  0.95080000   2.28454864
  0.95080000   2.23545826
  0.95080000   2.28341936
  0.95080000   2.23664045
  0.95080000   2.28235262
  0.95080000   2.23775479
  0.95080000   2.28134356
  0.95080000   2.23880654
  0.95080000   2.28038785
  0.95080000   2.23980044
  0.95080000   2.27948167
  0.95080000   2.24074070
  0.95080000   2.27862157
  0.95080000   2.24163113
  0.95080000   2.27780449
  0.95080000   2.24247515
  0.95080000   2.27702764
  0.95080000   2.24327588
  0.95080000   2.27628849
  0.95080000   2.24403612
  0.95080000   2.27558476
  0.95090000   2.28837774
  0.95090000   2.23201982
  0.95090000   2.28718326
  0.95090000   2.23328513
  0.95090000   2.28605468
  0.95090000   2.23447841
  0.95090000   2.28498649
  0.95090000   2.23560553
  0.95090000   2.28397388
  0.95090000   2.23667171
  0.95090000   2.28301262
  0.95090000   2.23768160
  0.95090000   2.28209893
  0.95090000   2.23863938
  0.95090000   2.28122947
  0.95090000   2.23954878
  0.95090000   2.28040123
  0.95090000   2.24041316
  0.95090000   2.27961153
  0.95090000   2.24123556
  0.95090000   2.27885791
  0.95090000   2.24201872
  0.95090000   2.27813817
  0.95100000   2.29109243
  0.95100000   2.22971565
  0.95100000   2.28991062
  0.95100000   2.23097993
  0.95100000   2.28879258
  0.95100000   2.23217394
  0.95100000   2.28773283
  0.95100000   2.23330350
  0.95100000   2.28672663
  0.95100000   2.23437381
  0.95100000   2.28576976
  0.95100000   2.23538947
  0.95100000   2.28485855
  0.95100000   2.23635463
  0.95100000   2.28398968
  0.95100000   2.23727296
  0.95100000   2.28316022
  0.95100000   2.23814777
  0.95100000   2.28236753
  0.95100000   2.23898205
  0.95100000   2.28160923
  0.95100000   2.23977848
  0.95100000   2.28088319
  0.95110000   2.29388369
  0.95110000   2.22729441
  0.95110000   2.29272393
  0.95110000   2.22854733
  0.95110000   2.29162596
  0.95110000   2.22973165
  0.95110000   2.29058433
  0.95110000   2.23085319
  0.95110000   2.28959432
  0.95110000   2.23191712
  0.95110000   2.28865178
  0.95110000   2.23292802
  0.95110000   2.28775306
  0.95110000   2.23388999
  0.95110000   2.28689490
  0.95110000   2.23480668
  0.95110000   2.28607440
  0.95110000   2.23568136
  0.95110000   2.28528897
  0.95110000   2.23651697
  0.95110000   2.28453628
  0.95110000   2.23731617
  0.95110000   2.28381423
  0.95120000   2.29674431
  0.95120000   2.22476183
  0.95120000   2.29561539
  0.95120000   2.22599333
  0.95120000   2.29454646
  0.95120000   2.22715780
  0.95120000   2.29353213
  0.95120000   2.22826102
  0.95120000   2.29256769
  0.95120000   2.22930815
  0.95120000   2.29164904
  0.95120000   2.23030376
  0.95120000   2.29077254
  0.95120000   2.23125190
  0.95120000   2.28993498
  0.95120000   2.23215622
  0.95120000   2.28913349
  0.95120000   2.23301995
  0.95120000   2.28836552
  0.95120000   2.23384600
  0.95120000   2.28762876
  0.95120000   2.23463701
  0.95120000   2.28692115
  0.95130000   2.29966637
  0.95130000   2.22212472
  0.95130000   2.29857630
  0.95130000   2.22332529
  0.95130000   2.29754464
  0.95130000   2.22446022
  0.95130000   2.29656604
  0.95130000   2.22553528
  0.95130000   2.29563584
  0.95130000   2.22655561
  0.95130000   2.29474994
  0.95130000   2.22752575
  0.95130000   2.29390475
  0.95130000   2.22844974
  0.95130000   2.29309708
  0.95130000   2.22933120
  0.95130000   2.29232410
  0.95130000   2.23017334
  0.95130000   2.29158327
  0.95130000   2.23097906
  0.95130000   2.29087233
  0.95130000   2.23175094
  0.95130000   2.29018924
  0.95140000   2.30264141
  0.95140000   2.21939088
  0.95140000   2.30159723
  0.95140000   2.22055176
  0.95140000   2.30061011
  0.95140000   2.22164821
  0.95140000   2.29967471
  0.95140000   2.22268601
  0.95140000   2.29878641
  0.95140000   2.22367025
  0.95140000   2.29794116
  0.95140000   2.22460547
  0.95140000   2.29713539
  0.95140000   2.22549567
  0.95140000   2.29636595
  0.95140000   2.22634444
  0.95140000   2.29563002
  0.95140000   2.22715499
  0.95140000   2.29492510
  0.95140000   2.22793018
  0.95140000   2.29424895
  0.95140000   2.22867259
  0.95140000   2.29359956
  0.95150000   2.30566054
  0.95150000   2.21656897
  0.95150000   2.30466822
  0.95150000   2.21768234
  0.95150000   2.30373176
  0.95150000   2.21873237
  0.95150000   2.30284587
  0.95150000   2.21972480
  0.95150000   2.30200597
  0.95150000   2.22066470
  0.95150000   2.30120803
  0.95150000   2.22155655
  0.95150000   2.30044854
  0.95150000   2.22240437
  0.95150000   2.29972436
  0.95150000   2.22321170
  0.95150000   2.29903273
  0.95150000   2.22398171
  0.95150000   2.29837116
  0.95150000   2.22471727
  0.95150000   2.29773743
  0.95150000   2.22542091
  0.95150000   2.29712956
  0.95160000   2.30871461
  0.95160000   2.21366837
  0.95160000   2.30777893
  0.95160000   2.21472755
  0.95160000   2.30689801
  0.95160000   2.21572438
  0.95160000   2.30606664
  0.95160000   2.21666455
  0.95160000   2.30528026
  0.95160000   2.21755309
  0.95160000   2.30453491
  0.95160000   2.21839446
  0.95160000   2.30382709
  0.95160000   2.21919264
  0.95160000   2.30315372
  0.95160000   2.21995115
  0.95160000   2.30251204
  0.95160000   2.22067314
  0.95160000   2.30189962
  0.95160000   2.22136143
  0.95160000   2.30131427
  0.95160000   2.22201854
  0.95160000   2.30075402
  0.95170000   2.31179436
  0.95170000   2.21069902
  0.95170000   2.31091884
  0.95170000   2.21169857
  0.95170000   2.31009706
  0.95170000   2.21263672
  0.95170000   2.30932383
  0.95170000   2.21351911
  0.95170000   2.30859467
  0.95170000   2.21435074
  0.95170000   2.30790565
  0.95170000   2.21513602
  0.95170000   2.30725331
  0.95170000   2.21587890
  0.95170000   2.30663460
  0.95170000   2.21658287
  0.95170000   2.30604681
  0.95170000   2.21725105
  0.95170000   2.30548754
  0.95170000   2.21788622
  0.95170000   2.30495462
  0.95170000   2.21849090
  0.95170000   2.30444611
  0.95180000   2.31489059
  0.95180000   2.20767121
  0.95180000   2.31407752
  0.95180000   2.20860703
  0.95180000   2.31331712
  0.95180000   2.20948244
  0.95180000   2.31260428
  0.95180000   2.21030301
  0.95180000   2.31193456
  0.95180000   2.21107371
  0.95180000   2.31130406
  0.95180000   2.21179892
  0.95180000   2.31070938
  0.95180000   2.21248254
  0.95180000   2.31014750
  0.95180000   2.21312804
  0.95180000   2.30961575
  0.95180000   2.21373850
  0.95180000   2.30911174
  0.95180000   2.21431669
  0.95180000   2.30863336
  0.95180000   2.21486508
  0.95180000   2.30817869
  0.95190000   2.31799431
  0.95190000   2.20459543
  0.95190000   2.31724475
  0.95190000   2.20546477
  0.95190000   2.31654671
  0.95190000   2.20627478
  0.95190000   2.31589514
  0.95190000   2.20703101
  0.95190000   2.31528564
  0.95190000   2.20773835
  0.95190000   2.31471437
  0.95190000   2.20840118
  0.95190000   2.31417796
  0.95190000   2.20902334
  0.95190000   2.31367343
  0.95190000   2.20960826
  0.95190000   2.31319814
  0.95190000   2.21015902
  0.95190000   2.31274974
  0.95190000   2.21067835
  0.95190000   2.31232613
  0.95190000   2.21116869
  0.95190000   2.31192542
  0.95200000   2.32109689
  0.95200000   2.20148214
  0.95200000   2.32041076
  0.95200000   2.20228358
  0.95200000   2.31977485
  0.95200000   2.20302696
  0.95200000   2.31918417
  0.95200000   2.20371778
  0.95200000   2.31863437
  0.95200000   2.20436090
  0.95200000   2.31812165
  0.95200000   2.20496062
  0.95200000   2.31764269
  0.95200000   2.20552079
  0.95200000   2.31719453
  0.95200000   2.20604480
  0.95200000   2.31677457
  0.95200000   2.20653568
  0.95200000   2.31638049
  0.95200000   2.20699615
  0.95200000   2.31601022
  0.95200000   2.20742864
  0.95200000   2.31566189
  0.95210000   2.32419017
  0.95210000   2.19834163
  0.95210000   2.32356635
  0.95210000   2.19907501
  0.95210000   2.32299127
  0.95210000   2.19975185
  0.95210000   2.32245998
  0.95210000   2.20037757
  0.95210000   2.32196818
  0.95210000   2.20095699
  0.95210000   2.32151214
  0.95210000   2.20149440
  0.95210000   2.32108856
  0.95210000   2.20199358
  0.95210000   2.32069452
  0.95210000   2.20245790
  0.95210000   2.32032745
  0.95210000   2.20289037
  0.95210000   2.31998507
  0.95210000   2.20329367
  0.95210000   2.31966532
  0.95210000   2.20367020
  0.95210000   2.31936638
  0.95220000   2.32726659
  0.95220000   2.19518380
  0.95220000   2.32670306
  0.95220000   2.19585014
  0.95220000   2.32618656
  0.95220000   2.19646170
  0.95220000   2.32571221
  0.95220000   2.19702386
  0.95220000   2.32527577
  0.95220000   2.19754140
  0.95220000   2.32487353
  0.95220000   2.19801855
  0.95220000   2.32450225
  0.95220000   2.19845905
  0.95220000   2.32415906
  0.95220000   2.19886625
  0.95220000   2.32384142
  0.95220000   2.19924311
  0.95220000   2.32354708
  0.95220000   2.19959230
  0.95220000   2.32327402
  0.95220000   2.19991617
  0.95220000   2.32302045
  0.95230000   2.33031926
  0.95230000   2.19201806
  0.95230000   2.32981324
  0.95230000   2.19261938
  0.95230000   2.32935232
  0.95230000   2.19316797
  0.95230000   2.32893169
  0.95230000   2.19366917
  0.95230000   2.32854718
  0.95230000   2.19412768
  0.95230000   2.32819512
  0.95230000   2.19454768
  0.95230000   2.32787234
  0.95230000   2.19493288
  0.95230000   2.32757600
  0.95230000   2.19528656
  0.95230000   2.32730361
  0.95230000   2.19561167
  0.95230000   2.32705296
  0.95230000   2.19591080
  0.95230000   2.32682208
  0.95230000   2.19618630
  0.95230000   2.32660920
  0.95240000   2.33334203
  0.95240000   2.18885318
  0.95240000   2.33289015
  0.95240000   2.18939236
  0.95240000   2.33248122
  0.95240000   2.18988115
  0.95240000   2.33211053
  0.95240000   2.19032481
  0.95240000   2.33177397
  0.95240000   2.19072796
  0.95240000   2.33146795
  0.95240000   2.19109473
  0.95240000   2.33118935
  0.95240000   2.19142877
  0.95240000   2.33093539
  0.95240000   2.19173330
  0.95240000   2.33070364
  0.95240000   2.19201120
  0.95240000   2.33049195
  0.95240000   2.19226503
  0.95240000   2.33029839
  0.95240000   2.19249707
  0.95240000   2.33012127
  0.95250000   2.33632952
  0.95250000   2.18569719
  0.95250000   2.33592794
  0.95250000   2.18617780
  0.95250000   2.33556701
  0.95250000   2.18661062
  0.95250000   2.33524210
  0.95250000   2.18700078
  0.95250000   2.33494918
  0.95250000   2.18735285
  0.95250000   2.33468476
  0.95250000   2.18767086
  0.95250000   2.33444577
  0.95250000   2.18795838
  0.95250000   2.33422953
  0.95250000   2.18821856
  0.95250000   2.33403366
  0.95250000   2.18845421
  0.95250000   2.33385608
  0.95250000   2.18866781
  0.95250000   2.33369494
  0.95250000   2.18886156
  0.95250000   2.33354860
  0.95260000   2.33927712
  0.95260000   2.18255735
  0.95260000   2.33892175
  0.95260000   2.18298348
  0.95260000   2.33860457
  0.95260000   2.18336460
  0.95260000   2.33832108
  0.95260000   2.18370574
  0.95260000   2.33806734
  0.95260000   2.18401135
  0.95260000   2.33783997
  0.95260000   2.18428537
  0.95260000   2.33763597
  0.95260000   2.18453126
  0.95260000   2.33745277
  0.95260000   2.18475209
  0.95260000   2.33728807
  0.95260000   2.18495055
  0.95260000   2.33713988
  0.95260000   2.18512905
  0.95260000   2.33700642
  0.95260000   2.18528971
  0.95260000   2.33688614
  0.95270000   2.34218101
  0.95270000   2.17944004
  0.95270000   2.34186759
  0.95270000   2.17981611
  0.95270000   2.34158983
  0.95270000   2.18015010
  0.95270000   2.34134335
  0.95270000   2.18044692
  0.95270000   2.34112435
  0.95270000   2.18071087
  0.95270000   2.34092953
  0.95270000   2.18094576
  0.95270000   2.34075603
  0.95270000   2.18115495
  0.95270000   2.34060138
  0.95270000   2.18134137
  0.95270000   2.34046337
  0.95270000   2.18150763
  0.95270000   2.34034012
  0.95270000   2.18165599
  0.95270000   2.34022993
  0.95270000   2.18178849
  0.95270000   2.34013136
  0.95280000   2.34503812
  0.95280000   2.17635081
  0.95280000   2.34476237
  0.95280000   2.17668143
  0.95280000   2.34451973
  0.95280000   2.17697299
  0.95280000   2.34430595
  0.95280000   2.17723021
  0.95280000   2.34411735
  0.95280000   2.17745728
  0.95280000   2.34395080
  0.95280000   2.17765783
  0.95280000   2.34380356
  0.95280000   2.17783509
  0.95280000   2.34367324
  0.95280000   2.17799186
  0.95280000   2.34355779
  0.95280000   2.17813061
  0.95280000   2.34345541
  0.95280000   2.17825348
  0.95280000   2.34336454
  0.95280000   2.17836236
  0.95280000   2.34328380
  0.95290000   2.34784608
  0.95290000   2.17329438
  0.95290000   2.34760383
  0.95290000   2.17358418
  0.95290000   2.34739213
  0.95290000   2.17383796
  0.95290000   2.34720691
  0.95290000   2.17406025
  0.95290000   2.34704466
  0.95290000   2.17425505
  0.95290000   2.34690238
  0.95290000   2.17442583
  0.95290000   2.34677745
  0.95290000   2.17457567
  0.95290000   2.34666765
  0.95290000   2.17470720
  0.95290000   2.34657104
  0.95290000   2.17482274
  0.95290000   2.34648594
  0.95290000   2.17492432
  0.95290000   2.34641088
  0.95290000   2.17501368
  0.95290000   2.34634462
  0.95300000   2.35060320
  0.95300000   2.17027462
  0.95300000   2.35039041
  0.95300000   2.17052818
  0.95300000   2.35020572
  0.95300000   2.17074869
  0.95300000   2.35004520
  0.95300000   2.17094048
  0.95300000   2.34990554
  0.95300000   2.17110736
  0.95300000   2.34978387
  0.95300000   2.17125263
  0.95300000   2.34967774
  0.95300000   2.17137917
  0.95300000   2.34958505
  0.95300000   2.17148946
  0.95300000   2.34950400
  0.95300000   2.17158567
  0.95300000   2.34943303
  0.95300000   2.17166966
  0.95300000   2.34937081
  0.95300000   2.17174305
  0.95300000   2.34931617
  0.95310000   2.35330837
  0.95310000   2.16729463
  0.95310000   2.35312127
  0.95310000   2.16751633
  0.95310000   2.35295991
  0.95310000   2.16770785
  0.95310000   2.35282056
  0.95310000   2.16787330
  0.95310000   2.35270007
  0.95310000   2.16801629
  0.95310000   2.35259575
  0.95310000   2.16813991
  0.95310000   2.35250529
  0.95310000   2.16824686
  0.95310000   2.35242674
  0.95310000   2.16833946
  0.95310000   2.35235844
  0.95310000   2.16841971
  0.95310000   2.35229893
  0.95310000   2.16848933
  0.95310000   2.35224702
  0.95310000   2.16854978
  0.95310000   2.35220163
  0.95320000   2.35596102
  0.95320000   2.16435681
  0.95320000   2.35579611
  0.95320000   2.16455078
  0.95320000   2.35565474
  0.95320000   2.16471728
  0.95320000   2.35553337
  0.95320000   2.16486020
  0.95320000   2.35542903
  0.95320000   2.16498291
  0.95320000   2.35533918
  0.95320000   2.16508834
  0.95320000   2.35526168
  0.95320000   2.16517897
  0.95320000   2.35519473
  0.95320000   2.16525697
  0.95320000   2.35513677
  0.95320000   2.16532416
  0.95320000   2.35508650
  0.95320000   2.16538213
  0.95320000   2.35504280
  0.95320000   2.16543219
  0.95320000   2.35500474
  0.95330000   2.35856108
  0.95330000   2.16146289
  0.95330000   2.35841517
  0.95330000   2.16163295
  0.95330000   2.35829077
  0.95330000   2.16177806
  0.95330000   2.35818455
  0.95330000   2.16190187
  0.95330000   2.35809369
  0.95330000   2.16200753
  0.95330000   2.35801584
  0.95330000   2.16209778
  0.95330000   2.35794899
  0.95330000   2.16217493
  0.95330000   2.35789147
  0.95330000   2.16224096
  0.95330000   2.35784187
  0.95330000   2.16229755
  0.95330000   2.35779899
  0.95330000   2.16234613
  0.95330000   2.35776182
  0.95330000   2.16238790
  0.95330000   2.35772952
  0.95340000   2.36110883
  0.95340000   2.15861401
  0.95340000   2.36097907
  0.95340000   2.15876365
  0.95340000   2.36086899
  0.95340000   2.15889062
  0.95340000   2.36077543
  0.95340000   2.15899834
  0.95340000   2.36069577
  0.95340000   2.15908978
  0.95340000   2.36062779
  0.95340000   2.15916746
  0.95340000   2.36056964
  0.95340000   2.15923354
  0.95340000   2.36051977
  0.95340000   2.15928982
  0.95340000   2.36047689
  0.95340000   2.15933784
  0.95340000   2.36043990
  0.95340000   2.15937890
  0.95340000   2.36040789
  0.95340000   2.15941409
  0.95340000   2.36038010
  0.95350000   2.36360494
  0.95350000   2.15581082
  0.95350000   2.36348879
  0.95350000   2.15594315
  0.95350000   2.36339070
  0.95350000   2.15605485
  0.95350000   2.36330768
  0.95350000   2.15614913
  0.95350000   2.36323726
  0.95350000   2.15622877
  0.95350000   2.36317737
  0.95350000   2.15629611
  0.95350000   2.36312630
  0.95350000   2.15635313
  0.95350000   2.36308261
  0.95350000   2.15640150
  0.95350000   2.36304511
  0.95350000   2.15644263
  0.95350000   2.36301280
  0.95350000   2.15647768
  0.95350000   2.36298488
  0.95350000   2.15650764
  0.95350000   2.36296063
  0.95360000   2.36605033
  0.95360000   2.15305348
  0.95360000   2.36594559
  0.95360000   2.15317126
  0.95360000   2.36585748
  0.95360000   2.15327020
  0.95360000   2.36578318
  0.95360000   2.15335333
  0.95360000   2.36572036
  0.95360000   2.15342322
  0.95360000   2.36566709
  0.95360000   2.15348207
  0.95360000   2.36562176
  0.95360000   2.15353171
  0.95360000   2.36558305
  0.95360000   2.15357368
  0.95360000   2.36554986
  0.95360000   2.15360927
  0.95360000   2.36552129
  0.95360000   2.15363953
  0.95360000   2.36549658
  0.95360000   2.15366534
  0.95360000   2.36547513
  0.95370000   2.36844616
  0.95370000   2.15034183
  0.95370000   2.36835091
  0.95370000   2.15044745
  0.95370000   2.36827108
  0.95370000   2.15053578
  0.95370000   2.36820398
  0.95370000   2.15060967
  0.95370000   2.36814740
  0.95370000   2.15067154
  0.95370000   2.36809953
  0.95370000   2.15072345
  0.95370000   2.36805886
  0.95370000   2.15076709
  0.95370000   2.36802416
  0.95370000   2.15080389
  0.95370000   2.36799443
  0.95370000   2.15083501
  0.95370000   2.36796884
  0.95370000   2.15086143
  0.95370000   2.36794669
  0.95370000   2.15088395
  0.95370000   2.36792743
  0.95380000   2.37079375
  0.95380000   2.14767534
  0.95380000   2.37070638
  0.95380000   2.14777088
  0.95380000   2.37063339
  0.95380000   2.14785042
  0.95380000   2.37057221
  0.95380000   2.14791668
  0.95380000   2.37052075
  0.95380000   2.14797197
  0.95380000   2.37047729
  0.95380000   2.14801819
  0.95380000   2.37044041
  0.95380000   2.14805694
  0.95380000   2.37040897
  0.95380000   2.14808954
  0.95380000   2.37038203
  0.95380000   2.14811707
  0.95380000   2.37035882
  0.95380000   2.14814042
  0.95380000   2.37033872
  0.95380000   2.14816030
  0.95380000   2.37032120
  0.95390000   2.37309456
  0.95390000   2.14505327
  0.95390000   2.37301370
  0.95390000   2.14514046
  0.95390000   2.37294636
  0.95390000   2.14521274
  0.95390000   2.37289007
  0.95390000   2.14527272
  0.95390000   2.37284281
  0.95390000   2.14532258
  0.95390000   2.37280296
  0.95390000   2.14536414
  0.95390000   2.37276918
  0.95390000   2.14539890
  0.95390000   2.37274038
  0.95390000   2.14542809
  0.95390000   2.37271570
  0.95390000   2.14545270
  0.95390000   2.37269442
  0.95390000   2.14547355
  0.95390000   2.37267596
  0.95390000   2.14549132
  0.95390000   2.37265985
  0.95400000   2.37535013
  0.95400000   2.14247465
  0.95400000   2.37527465
  0.95400000   2.14255495
  0.95400000   2.37521198
  0.95400000   2.14262124
  0.95400000   2.37515973
  0.95400000   2.14267603
  0.95400000   2.37511594
  0.95400000   2.14272141
  0.95400000   2.37507907
  0.95400000   2.14275913
  0.95400000   2.37504783
  0.95400000   2.14279061
  0.95400000   2.37502120
  0.95400000   2.14281699
  0.95400000   2.37499837
  0.95400000   2.14283922
  0.95400000   2.37497866
  0.95400000   2.14285805
  0.95400000   2.37496154
  0.95400000   2.14287409
  0.95400000   2.37494657
  0.95410000   2.37756206
  0.95410000   2.13993838
  0.95410000   2.37749103
  0.95410000   2.14001299
  0.95410000   2.37743224
  0.95410000   2.14007431
  0.95410000   2.37738334
  0.95410000   2.14012479
  0.95410000   2.37734244
  0.95410000   2.14016646
  0.95410000   2.37730804
  0.95410000   2.14020099
  0.95410000   2.37727891
  0.95410000   2.14022974
  0.95410000   2.37725408
  0.95410000   2.14025381
  0.95410000   2.37723278
  0.95410000   2.14027407
  0.95410000   2.37721437
  0.95410000   2.14029123
  0.95410000   2.37719835
  0.95410000   2.14030586
  0.95410000   2.37718431
  0.95420000   2.37973197
  0.95420000   2.13744322
  0.95420000   2.37966465
  0.95420000   2.13751313
  0.95420000   2.37960910
  0.95420000   2.13757030
  0.95420000   2.37956301
  0.95420000   2.13761717
  0.95420000   2.37952453
  0.95420000   2.13765573
  0.95420000   2.37949220
  0.95420000   2.13768759
  0.95420000   2.37946484
  0.95420000   2.13771407
  0.95420000   2.37944152
  0.95420000   2.13773619
  0.95420000   2.37942150
  0.95420000   2.13775480
  0.95420000   2.37940417
  0.95420000   2.13777057
  0.95420000   2.37938907
  0.95420000   2.13778403
  0.95420000   2.37937581
  0.95430000   2.38186150
  0.95430000   2.13498787
  0.95430000   2.38179728
  0.95430000   2.13505386
  0.95430000   2.38174447
  0.95430000   2.13510755
  0.95430000   2.38170076
  0.95430000   2.13515137
  0.95430000   2.38166434
  0.95430000   2.13518729
  0.95430000   2.38163377
  0.95430000   2.13521689
  0.95430000   2.38160791
  0.95430000   2.13524143
  0.95430000   2.38158587
  0.95430000   2.13526191
  0.95430000   2.38156693
  0.95430000   2.13527913
  0.95430000   2.38155052
  0.95430000   2.13529372
  0.95430000   2.38153619
  0.95430000   2.13530618
  0.95430000   2.38152359
  0.95440000   2.38395226
  0.95440000   2.13257099
  0.95440000   2.38389068
  0.95440000   2.13263366
  0.95440000   2.38384020
  0.95440000   2.13268439
  0.95440000   2.38379853
  0.95440000   2.13272560
  0.95440000   2.38376388
  0.95440000   2.13275925
  0.95440000   2.38373483
  0.95440000   2.13278690
  0.95440000   2.38371027
  0.95440000   2.13280978
  0.95440000   2.38368932
  0.95440000   2.13282885
  0.95440000   2.38367131
  0.95440000   2.13284488
  0.95440000   2.38365568
  0.95440000   2.13285847
  0.95440000   2.38364203
  0.95440000   2.13287008
  0.95440000   2.38362999
  0.95450000   2.38600584
  0.95450000   2.13019119
  0.95450000   2.38594652
  0.95450000   2.13025103
  0.95450000   2.38589806
  0.95450000   2.13029920
  0.95450000   2.38585818
  0.95450000   2.13033814
  0.95450000   2.38582508
  0.95450000   2.13036982
  0.95450000   2.38579735
  0.95450000   2.13039577
  0.95450000   2.38577391
  0.95450000   2.13041720
  0.95450000   2.38575392
  0.95450000   2.13043504
  0.95450000   2.38573672
  0.95450000   2.13045004
  0.95450000   2.38572178
  0.95450000   2.13046275
  0.95450000   2.38570870
  0.95450000   2.13047362
  0.95450000   2.38569716
  0.95460000   2.38802377
  0.95460000   2.12784710
  0.95460000   2.38796643
  0.95460000   2.12790448
  0.95460000   2.38791977
  0.95460000   2.12795039
  0.95460000   2.38788147
  0.95460000   2.12798732
  0.95460000   2.38784973
  0.95460000   2.12801725
  0.95460000   2.38782317
  0.95460000   2.12804170
  0.95460000   2.38780074
  0.95460000   2.12806185
  0.95460000   2.38778159
  0.95460000   2.12807862
  0.95460000   2.38776510
  0.95460000   2.12809271
  0.95460000   2.38775076
  0.95460000   2.12810465
  0.95460000   2.38773819
  0.95460000   2.12811489
  0.95460000   2.38772707
  0.95470000   2.39000755
  0.95470000   2.12553738
  0.95470000   2.38995199
  0.95470000   2.12559255
  0.95470000   2.38990693
  0.95470000   2.12563643
  0.95470000   2.38987005
  0.95470000   2.12567157
  0.95470000   2.38983954
  0.95470000   2.12569993
  0.95470000   2.38981403
  0.95470000   2.12572303
  0.95470000   2.38979249
  0.95470000   2.12574204
  0.95470000   2.38977409
  0.95470000   2.12575785
  0.95470000   2.38975823
  0.95470000   2.12577113
  0.95470000   2.38974443
  0.95470000   2.12578240
  0.95470000   2.38973230
  0.95470000   2.12579206
  0.95470000   2.38972157
  0.95480000   2.39195861
  0.95480000   2.12326067
  0.95480000   2.39190466
  0.95480000   2.12331385
  0.95480000   2.39186108
  0.95480000   2.12335588
  0.95480000   2.39182549
  0.95480000   2.12338936
  0.95480000   2.39179610
  0.95480000   2.12341630
  0.95480000   2.39177154
  0.95480000   2.12343818
  0.95480000   2.39175080
  0.95480000   2.12345616
  0.95480000   2.39173308
  0.95480000   2.12347111
  0.95480000   2.39171779
  0.95480000   2.12348366
  0.95480000   2.39170446
  0.95480000   2.12349433
  0.95480000   2.39169273
  0.95480000   2.12350348
  0.95480000   2.39168234
  0.95490000   2.39387832
  0.95490000   2.12101569
  0.95490000   2.39382587
  0.95490000   2.12106700
  0.95490000   2.39378366
  0.95490000   2.12110732
  0.95490000   2.39374926
  0.95490000   2.12113928
  0.95490000   2.39372090
  0.95490000   2.12116490
  0.95490000   2.39369721
  0.95490000   2.12118567
  0.95490000   2.39367720
  0.95490000   2.12120272
  0.95490000   2.39366009
  0.95490000   2.12121687
  0.95490000   2.39364531
  0.95490000   2.12122878
  0.95490000   2.39363242
  0.95490000   2.12123890
  0.95490000   2.39362105
  0.95490000   2.12124760
  0.95490000   2.39361096
  0.95500000   2.39576800
  0.95500000   2.11880119
  0.95500000   2.39571697
  0.95500000   2.11885074
  0.95500000   2.39567603
  0.95500000   2.11888943
  0.95500000   2.39564275
  0.95500000   2.11891997
  0.95500000   2.39561534
  0.95500000   2.11894437
  0.95500000   2.39559246
  0.95500000   2.11896411
  0.95500000   2.39557311
  0.95500000   2.11898030
  0.95500000   2.39555657
  0.95500000   2.11899374
  0.95500000   2.39554225
  0.95500000   2.11900505
  0.95500000   2.39552974
  0.95500000   2.11901468
  0.95500000   2.39551871
  0.95500000   2.11902298
  0.95500000   2.39550889
  0.95510000   2.39762887
  0.95510000   2.11661596
  0.95510000   2.39757920
  0.95510000   2.11666381
  0.95510000   2.39753948
  0.95510000   2.11670096
  0.95510000   2.39750725
  0.95510000   2.11673016
  0.95510000   2.39748073
  0.95510000   2.11675342
  0.95510000   2.39745859
  0.95510000   2.11677220
  0.95510000   2.39743987
  0.95510000   2.11678760
  0.95510000   2.39742383
  0.95510000   2.11680039
  0.95510000   2.39740994
  0.95510000   2.11681116
  0.95510000   2.39739778
  0.95510000   2.11682035
  0.95510000   2.39738704
  0.95510000   2.11682828
  0.95510000   2.39737748
  0.95520000   2.39946214
  0.95520000   2.11445886
  0.95520000   2.39941378
  0.95520000   2.11450506
  0.95520000   2.39937522
  0.95520000   2.11454072
  0.95520000   2.39934399
  0.95520000   2.11456865
  0.95520000   2.39931830
  0.95520000   2.11459083
  0.95520000   2.39929685
  0.95520000   2.11460873
  0.95520000   2.39927869
  0.95520000   2.11462340
  0.95520000   2.39926313
  0.95520000   2.11463559
  0.95520000   2.39924963
  0.95520000   2.11464587
  0.95520000   2.39923779
  0.95520000   2.11465465
  0.95520000   2.39922732
  0.95520000   2.11466224
  0.95520000   2.39921798
  0.95530000   2.40126890
  0.95530000   2.11232879
  0.95530000   2.40122183
  0.95530000   2.11237336
  0.95530000   2.40118438
  0.95530000   2.11240760
  0.95530000   2.40115409
  0.95530000   2.11243431
  0.95530000   2.40112918
  0.95530000   2.11245549
  0.95530000   2.40110838
  0.95530000   2.11247256
  0.95530000   2.40109076
  0.95530000   2.11248654
  0.95530000   2.40107562
  0.95530000   2.11249818
  0.95530000   2.40106248
  0.95530000   2.11250801
  0.95530000   2.40105094
  0.95530000   2.11251642
  0.95530000   2.40104071
  0.95530000   2.11252371
  0.95530000   2.40103158
  0.95540000   2.40305023
  0.95540000   2.11022471
  0.95540000   2.40300440
  0.95540000   2.11026769
  0.95540000   2.40296803
  0.95540000   2.11030054
  0.95540000   2.40293864
  0.95540000   2.11032609
  0.95540000   2.40291447
  0.95540000   2.11034631
  0.95540000   2.40289427
  0.95540000   2.11036261
  0.95540000   2.40287713
  0.95540000   2.11037596
  0.95540000   2.40286240
  0.95540000   2.11038710
  0.95540000   2.40284958
  0.95540000   2.11039651
  0.95540000   2.40283831
  0.95540000   2.11040458
  0.95540000   2.40282832
  0.95540000   2.11041159
  0.95540000   2.40281938
  0.95550000   2.40480710
  0.95550000   2.10814564
  0.95550000   2.40476251
  0.95550000   2.10818704
  0.95550000   2.40472718
  0.95550000   2.10821855
  0.95550000   2.40469864
  0.95550000   2.10824299
  0.95550000   2.40467516
  0.95550000   2.10826231
  0.95550000   2.40465552
  0.95550000   2.10827788
  0.95550000   2.40463884
  0.95550000   2.10829066
  0.95550000   2.40462448
  0.95550000   2.10830132
  0.95550000   2.40461196
  0.95550000   2.10831036
  0.95550000   2.40460094
  0.95550000   2.10831812
  0.95550000   2.40459115
  0.95550000   2.10832487
  0.95550000   2.40458238
  0.95560000   2.40654047
  0.95560000   2.10609064
  0.95560000   2.40649709
  0.95560000   2.10613048
  0.95560000   2.40646275
  0.95560000   2.10616069
  0.95560000   2.40643502
  0.95560000   2.10618408
  0.95560000   2.40641220
  0.95560000   2.10620255
  0.95560000   2.40639309
  0.95560000   2.10621744
  0.95560000   2.40637683
  0.95560000   2.10622968
  0.95560000   2.40636280
  0.95560000   2.10623991
  0.95560000   2.40635057
  0.95560000   2.10624860
  0.95560000   2.40633978
  0.95560000   2.10625607
  0.95560000   2.40633018
  0.95560000   2.10626259
  0.95560000   2.40632158
  0.95570000   2.40825123
  0.95570000   2.10405883
  0.95570000   2.40820902
  0.95570000   2.10409714
  0.95570000   2.40817565
  0.95570000   2.10412610
  0.95570000   2.40814869
  0.95570000   2.10414847
  0.95570000   2.40812648
  0.95570000   2.10416614
  0.95570000   2.40810786
  0.95570000   2.10418041
  0.95570000   2.40809199
  0.95570000   2.10419214
  0.95570000   2.40807828
  0.95570000   2.10420197
  0.95570000   2.40806630
  0.95570000   2.10421034
  0.95570000   2.40805573
  0.95570000   2.10421755
  0.95570000   2.40804631
  0.95570000   2.10422385
  0.95570000   2.40803785
  0.95580000   2.40994020
  0.95580000   2.10204938
  0.95580000   2.40989914
  0.95580000   2.10208619
  0.95580000   2.40986669
  0.95580000   2.10211393
  0.95580000   2.40984047
  0.95580000   2.10213534
  0.95580000   2.40981884
  0.95580000   2.10215227
  0.95580000   2.40980067
  0.95580000   2.10216594
  0.95580000   2.40978517
  0.95580000   2.10217721
  0.95580000   2.40977175
  0.95580000   2.10218667
  0.95580000   2.40976001
  0.95580000   2.10219474
  0.95580000   2.40974963
  0.95580000   2.10220172
  0.95580000   2.40974037
  0.95580000   2.10220782
  0.95580000   2.40973206
  0.95590000   2.41160818
  0.95590000   2.10006150
  0.95590000   2.41156823
  0.95590000   2.10009684
  0.95590000   2.41153667
  0.95590000   2.10012341
  0.95590000   2.41151114
  0.95590000   2.10014392
  0.95590000   2.41149006
  0.95590000   2.10016014
  0.95590000   2.41147232
  0.95590000   2.10017326
  0.95590000   2.41145715
  0.95590000   2.10018410
  0.95590000   2.41144401
  0.95590000   2.10019322
  0.95590000   2.41143248
  0.95590000   2.10020102
  0.95590000   2.41142229
  0.95590000   2.10020777
  0.95590000   2.41141318
  0.95590000   2.10021369
  0.95590000   2.41140500
  0.95600000   2.41325590
  0.95600000   2.09809446
  0.95600000   2.41321704
  0.95600000   2.09812836
  0.95600000   2.41318633
  0.95600000   2.09815382
  0.95600000   2.41316146
  0.95600000   2.09817346
  0.95600000   2.41314088
  0.95600000   2.09818901
  0.95600000   2.41312354
  0.95600000   2.09820163
  0.95600000   2.41310868
  0.95600000   2.09821207
  0.95600000   2.41309579
  0.95600000   2.09822088
  0.95600000   2.41308448
  0.95600000   2.09822843
  0.95600000   2.41307445
  0.95600000   2.09823497
  0.95600000   2.41306548
  0.95600000   2.09824072
  0.95600000   2.41305742
  0.95610000   2.41488408
  0.95610000   2.09614755
  0.95610000   2.41484627
  0.95610000   2.09618006
  0.95610000   2.41481636
  0.95610000   2.09620444
  0.95610000   2.41479211
  0.95610000   2.09622327
  0.95610000   2.41477201
  0.95610000   2.09623821
  0.95610000   2.41475504
  0.95610000   2.09625035
  0.95610000   2.41474047
  0.95610000   2.09626043
  0.95610000   2.41472782
  0.95610000   2.09626895
  0.95610000   2.41471669
  0.95610000   2.09627626
  0.95610000   2.41470682
  0.95610000   2.09628261
  0.95610000   2.41469799
  0.95610000   2.09628820
  0.95610000   2.41469004
  0.95620000   2.41649337
  0.95620000   2.09422011
  0.95620000   2.41645657
  0.95620000   2.09425127
  0.95620000   2.41642743
  0.95620000   2.09427464
  0.95620000   2.41640376
  0.95620000   2.09429271
  0.95620000   2.41638411
  0.95620000   2.09430707
  0.95620000   2.41636748
  0.95620000   2.09431877
  0.95620000   2.41635319
  0.95620000   2.09432850
  0.95620000   2.41634075
  0.95620000   2.09433675
  0.95620000   2.41632980
  0.95620000   2.09434385
  0.95620000   2.41632007
  0.95620000   2.09435002
  0.95620000   2.41631137
  0.95620000   2.09435546
  0.95620000   2.41630352
  0.95630000   2.41808441
  0.95630000   2.09231152
  0.95630000   2.41804858
  0.95630000   2.09234139
  0.95630000   2.41802016
  0.95630000   2.09236379
  0.95630000   2.41799704
  0.95630000   2.09238114
  0.95630000   2.41797780
  0.95630000   2.09239496
  0.95630000   2.41796149
  0.95630000   2.09240625
  0.95630000   2.41794745
  0.95630000   2.09241567
  0.95630000   2.41793521
  0.95630000   2.09242367
  0.95630000   2.41792443
  0.95630000   2.09243056
  0.95630000   2.41791484
  0.95630000   2.09243658
  0.95630000   2.41790626
  0.95630000   2.09244188
  0.95630000   2.41789851
  0.95640000   2.41965777
  0.95640000   2.09042119
  0.95640000   2.41962287
  0.95640000   2.09044981
  0.95640000   2.41959514
  0.95640000   2.09047131
  0.95640000   2.41957253
  0.95640000   2.09048798
  0.95640000   2.41955368
  0.95640000   2.09050131
  0.95640000   2.41953767
  0.95640000   2.09051221
  0.95640000   2.41952387
  0.95640000   2.09052134
  0.95640000   2.41951182
  0.95640000   2.09052911
  0.95640000   2.41950119
  0.95640000   2.09053582
  0.95640000   2.41949173
  0.95640000   2.09054168
  0.95640000   2.41948325
  0.95640000   2.09054685
  0.95640000   2.41947560
  0.95650000   2.42121403
  0.95650000   2.08854856
  0.95650000   2.42118001
  0.95650000   2.08857600
  0.95650000   2.42115293
  0.95650000   2.08859663
  0.95650000   2.42113080
  0.95650000   2.08861268
  0.95650000   2.42111231
  0.95650000   2.08862554
  0.95650000   2.42109658
  0.95650000   2.08863610
  0.95650000   2.42108300
  0.95650000   2.08864495
  0.95650000   2.42107113
  0.95650000   2.08865250
  0.95650000   2.42106064
  0.95650000   2.08865904
  0.95650000   2.42105131
  0.95650000   2.08866475
  0.95650000   2.42104293
  0.95650000   2.08866981
  0.95650000   2.42103537
  0.95660000   2.42275372
  0.95660000   2.08669310
  0.95660000   2.42272054
  0.95660000   2.08671942
  0.95660000   2.42269407
  0.95660000   2.08673925
  0.95660000   2.42267239
  0.95660000   2.08675471
  0.95660000   2.42265424
  0.95660000   2.08676713
  0.95660000   2.42263876
  0.95660000   2.08677736
  0.95660000   2.42262539
  0.95660000   2.08678596
  0.95660000   2.42261368
  0.95660000   2.08679331
  0.95660000   2.42260333
  0.95660000   2.08679968
  0.95660000   2.42259411
  0.95660000   2.08680527
  0.95660000   2.42258584
  0.95660000   2.08681020
  0.95660000   2.42257836
  0.95670000   2.42427734
  0.95670000   2.08485432
  0.95670000   2.42424495
  0.95670000   2.08487957
  0.95670000   2.42421905
  0.95670000   2.08489864
  0.95670000   2.42419780
  0.95670000   2.08491355
  0.95670000   2.42417996
  0.95670000   2.08492557
  0.95670000   2.42416473
  0.95670000   2.08493550
  0.95670000   2.42415154
  0.95670000   2.08494387
  0.95670000   2.42413999
  0.95670000   2.08495103
  0.95670000   2.42412977
  0.95670000   2.08495725
  0.95670000   2.42412066
  0.95670000   2.08496271
  0.95670000   2.42411247
  0.95670000   2.08496754
  0.95670000   2.42410508
  0.95680000   2.42578536
  0.95680000   2.08303174
  0.95680000   2.42575373
  0.95680000   2.08305598
  0.95680000   2.42572837
  0.95680000   2.08307434
  0.95680000   2.42570750
  0.95680000   2.08308875
  0.95680000   2.42568996
  0.95680000   2.08310039
  0.95680000   2.42567496
  0.95680000   2.08311004
  0.95680000   2.42566195
  0.95680000   2.08311818
  0.95680000   2.42565054
  0.95680000   2.08312517
  0.95680000   2.42564045
  0.95680000   2.08313125
  0.95680000   2.42563144
  0.95680000   2.08313659
  0.95680000   2.42562335
  0.95680000   2.08314132
  0.95680000   2.42561603
  0.95690000   2.42727826
  0.95690000   2.08122491
  0.95690000   2.42724733
  0.95690000   2.08124820
  0.95690000   2.42722248
  0.95690000   2.08126590
  0.95690000   2.42720198
  0.95690000   2.08127983
  0.95690000   2.42718471
  0.95690000   2.08129113
  0.95690000   2.42716992
  0.95690000   2.08130051
  0.95690000   2.42715708
  0.95690000   2.08130845
  0.95690000   2.42714581
  0.95690000   2.08131528
  0.95690000   2.42713583
  0.95690000   2.08132122
  0.95690000   2.42712692
  0.95690000   2.08132644
  0.95690000   2.42711891
  0.95690000   2.08133108
  0.95690000   2.42711167
  0.95700000   2.42875645
  0.95700000   2.07943340
  0.95700000   2.42872619
  0.95700000   2.07945580
  0.95700000   2.42870181
  0.95700000   2.07947287
  0.95700000   2.42868165
  0.95700000   2.07948636
  0.95700000   2.42866464
  0.95700000   2.07949734
  0.95700000   2.42865005
  0.95700000   2.07950648
  0.95700000   2.42863737
  0.95700000   2.07951423
  0.95700000   2.42862623
  0.95700000   2.07952090
  0.95700000   2.42861636
  0.95700000   2.07952671
  0.95700000   2.42860754
  0.95700000   2.07953183
  0.95700000   2.42859961
  0.95700000   2.07953637
  0.95700000   2.42859244
  0.95710000   2.43022037
  0.95710000   2.07765680
  0.95710000   2.43019073
  0.95710000   2.07767836
  0.95710000   2.43016678
  0.95710000   2.07769486
  0.95710000   2.43014695
  0.95710000   2.07770794
  0.95710000   2.43013018
  0.95710000   2.07771861
  0.95710000   2.43011577
  0.95710000   2.07772752
  0.95710000   2.43010324
  0.95710000   2.07773509
  0.95710000   2.43009223
  0.95710000   2.07774162
  0.95710000   2.43008246
  0.95710000   2.07774732
  0.95710000   2.43007373
  0.95710000   2.07775233
  0.95710000   2.43006588
  0.95710000   2.07775679
  0.95710000   2.43005878
  0.95720000   2.43167039
  0.95720000   2.07589472
  0.95720000   2.43164133
  0.95720000   2.07591550
  0.95720000   2.43161780
  0.95720000   2.07593146
  0.95720000   2.43159826
  0.95720000   2.07594416
  0.95720000   2.43158172
  0.95720000   2.07595455
  0.95720000   2.43156749
  0.95720000   2.07596325
  0.95720000   2.43155511
  0.95720000   2.07597065
  0.95720000   2.43154421
  0.95720000   2.07597704
  0.95720000   2.43153454
  0.95720000   2.07598262
  0.95720000   2.43152590
  0.95720000   2.07598754
  0.95720000   2.43151812
  0.95720000   2.07599192
  0.95720000   2.43151108
  0.95730000   2.43310689
  0.95730000   2.07414679
  0.95730000   2.43307839
  0.95730000   2.07416684
  0.95730000   2.43305524
  0.95730000   2.07418230
  0.95730000   2.43303599
  0.95730000   2.07419464
  0.95730000   2.43301966
  0.95730000   2.07420477
  0.95730000   2.43300559
  0.95730000   2.07421327
  0.95730000   2.43299334
  0.95730000   2.07422051
  0.95730000   2.43298256
  0.95730000   2.07422678
  0.95730000   2.43297298
  0.95730000   2.07423225
  0.95730000   2.43296442
  0.95730000   2.07423708
  0.95730000   2.43295671
  0.95730000   2.07424137
  0.95730000   2.43294974
  0.95740000   2.43453025
  0.95740000   2.07241265
  0.95740000   2.43450226
  0.95740000   2.07243202
  0.95740000   2.43447948
  0.95740000   2.07244702
  0.95740000   2.43446048
  0.95740000   2.07245903
  0.95740000   2.43444435
  0.95740000   2.07246892
  0.95740000   2.43443045
  0.95740000   2.07247722
  0.95740000   2.43441832
  0.95740000   2.07248432
  0.95740000   2.43440764
  0.95740000   2.07249046
  0.95740000   2.43439816
  0.95740000   2.07249582
  0.95740000   2.43438967
  0.95740000   2.07250057
  0.95740000   2.43438204
  0.95740000   2.07250479
  0.95740000   2.43437512
  0.95750000   2.43594080
  0.95750000   2.07069196
  0.95750000   2.43591329
  0.95750000   2.07071070
  0.95750000   2.43589084
  0.95750000   2.07072527
  0.95750000   2.43587210
  0.95750000   2.07073697
  0.95750000   2.43585615
  0.95750000   2.07074663
  0.95750000   2.43584240
  0.95750000   2.07075476
  0.95750000   2.43583040
  0.95750000   2.07076171
  0.95750000   2.43581982
  0.95750000   2.07076773
  0.95750000   2.43581042
  0.95750000   2.07077300
  0.95750000   2.43580201
  0.95750000   2.07077766
  0.95750000   2.43579444
  0.95750000   2.07078181
  0.95750000   2.43578758
  0.95760000   2.43733888
  0.95760000   2.06898441
  0.95760000   2.43731182
  0.95760000   2.06900256
  0.95760000   2.43728969
  0.95760000   2.06901672
  0.95760000   2.43727117
  0.95760000   2.06902813
  0.95760000   2.43725541
  0.95760000   2.06903757
  0.95760000   2.43724179
  0.95760000   2.06904554
  0.95760000   2.43722991
  0.95760000   2.06905235
  0.95760000   2.43721943
  0.95760000   2.06905826
  0.95760000   2.43721011
  0.95760000   2.06906344
  0.95760000   2.43720178
  0.95760000   2.06906802
  0.95760000   2.43719427
  0.95760000   2.06907210
  0.95760000   2.43718747
  0.95770000   2.43872480
  0.95770000   2.06728966
  0.95770000   2.43869816
  0.95770000   2.06730727
  0.95770000   2.43867632
  0.95770000   2.06732105
  0.95770000   2.43865803
  0.95770000   2.06733220
  0.95770000   2.43864243
  0.95770000   2.06734144
  0.95770000   2.43862895
  0.95770000   2.06734924
  0.95770000   2.43861718
  0.95770000   2.06735593
  0.95770000   2.43860679
  0.95770000   2.06736173
  0.95770000   2.43859756
  0.95770000   2.06736682
  0.95770000   2.43858929
  0.95770000   2.06737132
  0.95770000   2.43858184
  0.95770000   2.06737533
  0.95770000   2.43857510
  0.95780000   2.44009887
  0.95780000   2.06560744
  0.95780000   2.44007262
  0.95780000   2.06562453
  0.95780000   2.44005106
  0.95780000   2.06563796
  0.95780000   2.44003297
  0.95780000   2.06564886
  0.95780000   2.44001754
  0.95780000   2.06565790
  0.95780000   2.44000419
  0.95780000   2.06566555
  0.95780000   2.43999252
  0.95780000   2.06567212
  0.95780000   2.43998223
  0.95780000   2.06567783
  0.95780000   2.43997307
  0.95780000   2.06568283
  0.95780000   2.43996487
  0.95780000   2.06568726
  0.95780000   2.43995748
  0.95780000   2.06569120
  0.95780000   2.43995079
  0.95790000   2.44146138
  0.95790000   2.06393744
  0.95790000   2.44143550
  0.95790000   2.06395405
  0.95790000   2.44141420
  0.95790000   2.06396716
  0.95790000   2.44139631
  0.95790000   2.06397781
  0.95790000   2.44138103
  0.95790000   2.06398668
  0.95790000   2.44136780
  0.95790000   2.06399419
  0.95790000   2.44135623
  0.95790000   2.06400064
  0.95790000   2.44134603
  0.95790000   2.06400625
  0.95790000   2.44133694
  0.95790000   2.06401117
  0.95790000   2.44132881
  0.95790000   2.06401552
  0.95790000   2.44132148
  0.95790000   2.06401941
  0.95790000   2.44131483
  0.95800000   2.44281261
  0.95800000   2.06227939
  0.95800000   2.44278707
  0.95800000   2.06229556
  0.95800000   2.44276603
  0.95800000   2.06230836
  0.95800000   2.44274832
  0.95800000   2.06231879
  0.95800000   2.44273318
  0.95800000   2.06232748
  0.95800000   2.44272007
  0.95800000   2.06233486
  0.95800000   2.44270861
  0.95800000   2.06234120
  0.95800000   2.44269848
  0.95800000   2.06234671
  0.95800000   2.44268947
  0.95800000   2.06235155
  0.95800000   2.44268140
  0.95800000   2.06235584
  0.95800000   2.44267412
  0.95800000   2.06235966
  0.95800000   2.44266753
  0.95810000   2.44415283
  0.95810000   2.06063302
  0.95810000   2.44412762
  0.95810000   2.06064877
  0.95810000   2.44410681
  0.95810000   2.06066129
  0.95810000   2.44408928
  0.95810000   2.06067151
  0.95810000   2.44407428
  0.95810000   2.06068004
  0.95810000   2.44406128
  0.95810000   2.06068729
  0.95810000   2.44404991
  0.95810000   2.06069352
  0.95810000   2.44403987
  0.95810000   2.06069894
  0.95810000   2.44403093
  0.95810000   2.06070371
  0.95810000   2.44402291
  0.95810000   2.06070793
  0.95810000   2.44401569
  0.95810000   2.06071170
  0.95810000   2.44400914
  0.95820000   2.44548231
  0.95820000   2.05899808
  0.95820000   2.44545741
  0.95820000   2.05901345
  0.95820000   2.44543681
  0.95820000   2.05902569
  0.95820000   2.44541945
  0.95820000   2.05903571
  0.95820000   2.44540458
  0.95820000   2.05904409
  0.95820000   2.44539170
  0.95820000   2.05905121
  0.95820000   2.44538042
  0.95820000   2.05905734
  0.95820000   2.44537045
  0.95820000   2.05906268
  0.95820000   2.44536158
  0.95820000   2.05906737
  0.95820000   2.44535362
  0.95820000   2.05907153
  0.95820000   2.44534645
  0.95820000   2.05907524
  0.95820000   2.44533995
  0.95830000   2.44680130
  0.95830000   2.05737432
  0.95830000   2.44677668
  0.95830000   2.05738932
  0.95830000   2.44675629
  0.95830000   2.05740131
  0.95830000   2.44673909
  0.95830000   2.05741115
  0.95830000   2.44672435
  0.95830000   2.05741938
  0.95830000   2.44671157
  0.95830000   2.05742638
  0.95830000   2.44670038
  0.95830000   2.05743241
  0.95830000   2.44669049
  0.95830000   2.05743767
  0.95830000   2.44668168
  0.95830000   2.05744229
  0.95830000   2.44667378
  0.95830000   2.05744639
  0.95830000   2.44666666
  0.95830000   2.05745005
  0.95830000   2.44666021
  0.95840000   2.44811003
  0.95840000   2.05576150
  0.95840000   2.44808568
  0.95840000   2.05577617
  0.95840000   2.44806550
  0.95840000   2.05578792
  0.95840000   2.44804845
  0.95840000   2.05579757
  0.95840000   2.44803383
  0.95840000   2.05580566
  0.95840000   2.44802115
  0.95840000   2.05581255
  0.95840000   2.44801004
  0.95840000   2.05581849
  0.95840000   2.44800023
  0.95840000   2.05582366
  0.95840000   2.44799148
  0.95840000   2.05582822
  0.95840000   2.44798364
  0.95840000   2.05583226
  0.95840000   2.44797657
  0.95840000   2.05583586
  0.95840000   2.44797015
  0.95850000   2.44940874
  0.95850000   2.05415939
  0.95850000   2.44938466
  0.95850000   2.05417374
  0.95850000   2.44936466
  0.95850000   2.05418526
  0.95850000   2.44934775
  0.95850000   2.05419474
  0.95850000   2.44933326
  0.95850000   2.05420270
  0.95850000   2.44932068
  0.95850000   2.05420948
  0.95850000   2.44930965
  0.95850000   2.05421533
  0.95850000   2.44929990
  0.95850000   2.05422043
  0.95850000   2.44929122
  0.95850000   2.05422491
  0.95850000   2.44928343
  0.95850000   2.05422890
  0.95850000   2.44927640
  0.95850000   2.05423245
  0.95850000   2.44927004
  0.95860000   2.45069766
  0.95860000   2.05256777
  0.95860000   2.45067382
  0.95860000   2.05258182
  0.95860000   2.45065400
  0.95860000   2.05259313
  0.95860000   2.45063724
  0.95860000   2.05260245
  0.95860000   2.45062286
  0.95860000   2.05261028
  0.95860000   2.45061037
  0.95860000   2.05261695
  0.95860000   2.45059942
  0.95860000   2.05262271
  0.95860000   2.45058974
  0.95860000   2.05262774
  0.95860000   2.45058112
  0.95860000   2.05263216
  0.95860000   2.45057338
  0.95860000   2.05263608
  0.95860000   2.45056641
  0.95860000   2.05263959
  0.95860000   2.45056008
  0.95870000   2.45197701
  0.95870000   2.05098642
  0.95870000   2.45195340
  0.95870000   2.05100019
  0.95870000   2.45193375
  0.95870000   2.05101130
  0.95870000   2.45191712
  0.95870000   2.05102046
  0.95870000   2.45190285
  0.95870000   2.05102817
  0.95870000   2.45189046
  0.95870000   2.05103474
  0.95870000   2.45187959
  0.95870000   2.05104041
  0.95870000   2.45186997
  0.95870000   2.05104537
  0.95870000   2.45186141
  0.95870000   2.05104973
  0.95870000   2.45185372
  0.95870000   2.05105360
  0.95870000   2.45184679
  0.95870000   2.05105706
  0.95870000   2.45184050
  0.95880000   2.45324699
  0.95880000   2.04941514
  0.95880000   2.45322360
  0.95880000   2.04942865
  0.95880000   2.45320412
  0.95880000   2.04943956
  0.95880000   2.45318762
  0.95880000   2.04944857
  0.95880000   2.45317346
  0.95880000   2.04945616
  0.95880000   2.45316115
  0.95880000   2.04946264
  0.95880000   2.45315035
  0.95880000   2.04946823
  0.95880000   2.45314080
  0.95880000   2.04947311
  0.95880000   2.45313229
  0.95880000   2.04947742
  0.95880000   2.45312466
  0.95880000   2.04948124
  0.95880000   2.45311777
  0.95880000   2.04948465
  0.95880000   2.45311152
  0.95890000   2.45450781
  0.95890000   2.04785373
  0.95890000   2.45448463
  0.95890000   2.04786699
  0.95890000   2.45446531
  0.95890000   2.04787771
  0.95890000   2.45444893
  0.95890000   2.04788658
  0.95890000   2.45443487
  0.95890000   2.04789405
  0.95890000   2.45442265
  0.95890000   2.04790044
  0.95890000   2.45441193
  0.95890000   2.04790595
  0.95890000   2.45440244
  0.95890000   2.04791077
  0.95890000   2.45439399
  0.95890000   2.04791502
  0.95890000   2.45438640
  0.95890000   2.04791878
  0.95890000   2.45437955
  0.95890000   2.04792215
  0.95890000   2.45437334
  0.95900000   2.45575967
  0.95900000   2.04630200
  0.95900000   2.45573668
  0.95900000   2.04631501
  0.95900000   2.45571751
  0.95900000   2.04632556
  0.95900000   2.45570126
  0.95900000   2.04633429
  0.95900000   2.45568730
  0.95900000   2.04634165
  0.95900000   2.45567516
  0.95900000   2.04634795
  0.95900000   2.45566451
  0.95900000   2.04635339
  0.95900000   2.45565509
  0.95900000   2.04635814
  0.95900000   2.45564668
  0.95900000   2.04636233
  0.95900000   2.45563914
  0.95900000   2.04636605
  0.95900000   2.45563234
  0.95900000   2.04636938
  0.95900000   2.45562616
  0.95910000   2.45700275
  0.95910000   2.04475974
  0.95910000   2.45697995
  0.95910000   2.04477254
  0.95910000   2.45696093
  0.95910000   2.04478291
  0.95910000   2.45694480
  0.95910000   2.04479152
  0.95910000   2.45693093
  0.95910000   2.04479877
  0.95910000   2.45691888
  0.95910000   2.04480497
  0.95910000   2.45690830
  0.95910000   2.04481034
  0.95910000   2.45689893
  0.95910000   2.04481503
  0.95910000   2.45689058
  0.95910000   2.04481916
  0.95910000   2.45688308
  0.95910000   2.04482284
  0.95910000   2.45687632
  0.95910000   2.04482612
  0.95910000   2.45687018
  0.95920000   2.45823723
  0.95920000   2.04322680
  0.95920000   2.45821463
  0.95920000   2.04323937
  0.95920000   2.45819575
  0.95920000   2.04324959
  0.95920000   2.45817973
  0.95920000   2.04325807
  0.95920000   2.45816596
  0.95920000   2.04326522
  0.95920000   2.45815398
  0.95920000   2.04327134
  0.95920000   2.45814346
  0.95920000   2.04327663
  0.95920000   2.45813416
  0.95920000   2.04328126
  0.95920000   2.45812585
  0.95920000   2.04328534
  0.95920000   2.45811840
  0.95920000   2.04328897
  0.95920000   2.45811168
  0.95920000   2.04329221
  0.95920000   2.45810558
  0.95930000   2.45946331
  0.95930000   2.04170299
  0.95930000   2.45944088
  0.95930000   2.04171536
  0.95930000   2.45942214
  0.95930000   2.04172542
  0.95930000   2.45940623
  0.95930000   2.04173377
  0.95930000   2.45939255
  0.95930000   2.04174082
  0.95930000   2.45938065
  0.95930000   2.04174686
  0.95930000   2.45937020
  0.95930000   2.04175208
  0.95930000   2.45936095
  0.95930000   2.04175665
  0.95930000   2.45935269
  0.95930000   2.04176068
  0.95930000   2.45934529
  0.95930000   2.04176427
  0.95930000   2.45933860
  0.95930000   2.04176747
  0.95930000   2.45933253
  0.95940000   2.46068114
  0.95940000   2.04018814
  0.95940000   2.46065888
  0.95940000   2.04020030
  0.95940000   2.46064028
  0.95940000   2.04021021
  0.95940000   2.46062448
  0.95940000   2.04021845
  0.95940000   2.46061088
  0.95940000   2.04022541
  0.95940000   2.46059906
  0.95940000   2.04023136
  0.95940000   2.46058867
  0.95940000   2.04023652
  0.95940000   2.46057947
  0.95940000   2.04024103
  0.95940000   2.46057127
  0.95940000   2.04024501
  0.95940000   2.46056391
  0.95940000   2.04024855
  0.95940000   2.46055726
  0.95940000   2.04025172
  0.95940000   2.46055122
  0.95950000   2.46189091
  0.95950000   2.03868208
  0.95950000   2.46186881
  0.95950000   2.03869406
  0.95950000   2.46185033
  0.95950000   2.03870382
  0.95950000   2.46183464
  0.95950000   2.03871195
  0.95950000   2.46182113
  0.95950000   2.03871881
  0.95950000   2.46180937
  0.95950000   2.03872469
  0.95950000   2.46179905
  0.95950000   2.03872978
  0.95950000   2.46178991
  0.95950000   2.03873424
  0.95950000   2.46178175
  0.95950000   2.03873817
  0.95950000   2.46177443
  0.95950000   2.03874167
  0.95950000   2.46176781
  0.95950000   2.03874480
  0.95950000   2.46176181
  0.95960000   2.46309276
  0.95960000   2.03718466
  0.95960000   2.46307082
  0.95960000   2.03719646
  0.95960000   2.46305247
  0.95960000   2.03720608
  0.95960000   2.46303687
  0.95960000   2.03721409
  0.95960000   2.46302345
  0.95960000   2.03722087
  0.95960000   2.46301176
  0.95960000   2.03722667
  0.95960000   2.46300150
  0.95960000   2.03723170
  0.95960000   2.46299241
  0.95960000   2.03723610
  0.95960000   2.46298430
  0.95960000   2.03723999
  0.95960000   2.46297702
  0.95960000   2.03724344
  0.95960000   2.46297044
  0.95960000   2.03724654
  0.95960000   2.46296447
  0.95970000   2.46428685
  0.95970000   2.03569572
  0.95970000   2.46426507
  0.95970000   2.03570734
  0.95970000   2.46424684
  0.95970000   2.03571683
  0.95970000   2.46423134
  0.95970000   2.03572474
  0.95970000   2.46421800
  0.95970000   2.03573143
  0.95970000   2.46420639
  0.95970000   2.03573716
  0.95970000   2.46419618
  0.95970000   2.03574212
  0.95970000   2.46418714
  0.95970000   2.03574647
  0.95970000   2.46417908
  0.95970000   2.03575031
  0.95970000   2.46417183
  0.95970000   2.03575373
  0.95970000   2.46416529
  0.95970000   2.03575679
  0.95970000   2.46415935
  0.95980000   2.46547335
  0.95980000   2.03421511
  0.95980000   2.46545172
  0.95980000   2.03422657
  0.95980000   2.46543360
  0.95980000   2.03423593
  0.95980000   2.46541820
  0.95980000   2.03424373
  0.95980000   2.46540494
  0.95980000   2.03425033
  0.95980000   2.46539339
  0.95980000   2.03425599
  0.95980000   2.46538324
  0.95980000   2.03426090
  0.95980000   2.46537426
  0.95980000   2.03426520
  0.95980000   2.46536623
  0.95980000   2.03426899
  0.95980000   2.46535903
  0.95980000   2.03427237
  0.95980000   2.46535252
  0.95980000   2.03427539
  0.95980000   2.46534661
  0.95990000   2.46665239
  0.95990000   2.03274269
  0.95990000   2.46663090
  0.95990000   2.03275399
  0.95990000   2.46661290
  0.95990000   2.03276322
  0.95990000   2.46659760
  0.95990000   2.03277092
  0.95990000   2.46658441
  0.95990000   2.03277744
  0.95990000   2.46657293
  0.95990000   2.03278303
  0.95990000   2.46656284
  0.95990000   2.03278788
  0.95990000   2.46655390
  0.95990000   2.03279213
  0.95990000   2.46654592
  0.95990000   2.03279588
  0.95990000   2.46653875
  0.95990000   2.03279922
  0.95990000   2.46653228
  0.95990000   2.03280221
  0.95990000   2.46652640
  0.96000000   2.46782412
  0.96000000   2.03127832
  0.96000000   2.46780277
  0.96000000   2.03128946
  0.96000000   2.46778489
  0.96000000   2.03129857
  0.96000000   2.46776967
  0.96000000   2.03130617
  0.96000000   2.46775656
  0.96000000   2.03131261
  0.96000000   2.46774514
  0.96000000   2.03131814
  0.96000000   2.46773511
  0.96000000   2.03132293
  0.96000000   2.46772621
  0.96000000   2.03132713
  0.96000000   2.46771828
  0.96000000   2.03133084
  0.96000000   2.46771115
  0.96000000   2.03133414
  0.96000000   2.46770471
  0.96000000   2.03133710
  0.96000000   2.46769886
  0.96010000   2.46898868
  0.96010000   2.02982186
  0.96010000   2.46896747
  0.96010000   2.02983284
  0.96010000   2.46894969
  0.96010000   2.02984184
  0.96010000   2.46893456
  0.96010000   2.02984935
  0.96010000   2.46892153
  0.96010000   2.02985571
  0.96010000   2.46891017
  0.96010000   2.02986116
  0.96010000   2.46890019
  0.96010000   2.02986590
  0.96010000   2.46889134
  0.96010000   2.02987006
  0.96010000   2.46888345
  0.96010000   2.02987372
  0.96010000   2.46887636
  0.96010000   2.02987699
  0.96010000   2.46886995
  0.96010000   2.02987992
  0.96010000   2.46886413
  0.96020000   2.47014621
  0.96020000   2.02837317
  0.96020000   2.47012513
  0.96020000   2.02838401
  0.96020000   2.47010745
  0.96020000   2.02839289
  0.96020000   2.47009241
  0.96020000   2.02840030
  0.96020000   2.47007945
  0.96020000   2.02840659
  0.96020000   2.47006816
  0.96020000   2.02841198
  0.96020000   2.47005823
  0.96020000   2.02841667
  0.96020000   2.47004943
  0.96020000   2.02842078
  0.96020000   2.47004157
  0.96020000   2.02842440
  0.96020000   2.47003451
  0.96020000   2.02842764
  0.96020000   2.47002814
  0.96020000   2.02843053
  0.96020000   2.47002235
  0.96030000   2.47129682
  0.96030000   2.02693213
  0.96030000   2.47127587
  0.96030000   2.02694282
  0.96030000   2.47125831
  0.96030000   2.02695160
  0.96030000   2.47124335
  0.96030000   2.02695892
  0.96030000   2.47123046
  0.96030000   2.02696513
  0.96030000   2.47121922
  0.96030000   2.02697047
  0.96030000   2.47120935
  0.96030000   2.02697510
  0.96030000   2.47120059
  0.96030000   2.02697916
  0.96030000   2.47119277
  0.96030000   2.02698275
  0.96030000   2.47118575
  0.96030000   2.02698594
  0.96030000   2.47117940
  0.96030000   2.02698881
  0.96030000   2.47117364
  0.96040000   2.47244067
  0.96040000   2.02549861
  0.96040000   2.47241984
  0.96040000   2.02550917
  0.96040000   2.47240238
  0.96040000   2.02551783
  0.96040000   2.47238750
  0.96040000   2.02552507
  0.96040000   2.47237468
  0.96040000   2.02553121
  0.96040000   2.47236350
  0.96040000   2.02553648
  0.96040000   2.47235368
  0.96040000   2.02554106
  0.96040000   2.47234496
  0.96040000   2.02554508
  0.96040000   2.47233719
  0.96040000   2.02554863
  0.96040000   2.47233020
  0.96040000   2.02555180
  0.96040000   2.47232388
  0.96040000   2.02555463
  0.96040000   2.47231814
  0.96050000   2.47357786
  0.96050000   2.02407249
  0.96050000   2.47355716
  0.96050000   2.02408291
  0.96050000   2.47353979
  0.96050000   2.02409147
  0.96050000   2.47352499
  0.96050000   2.02409862
  0.96050000   2.47351224
  0.96050000   2.02410469
  0.96050000   2.47350112
  0.96050000   2.02410991
  0.96050000   2.47349134
  0.96050000   2.02411444
  0.96050000   2.47348267
  0.96050000   2.02411842
  0.96050000   2.47347493
  0.96050000   2.02412193
  0.96050000   2.47346798
  0.96050000   2.02412506
  0.96050000   2.47346169
  0.96050000   2.02412787
  0.96050000   2.47345598
  0.96060000   2.47470851
  0.96060000   2.02265365
  0.96060000   2.47468793
  0.96060000   2.02266394
  0.96060000   2.47467066
  0.96060000   2.02267240
  0.96060000   2.47465595
  0.96060000   2.02267947
  0.96060000   2.47464326
  0.96060000   2.02268547
  0.96060000   2.47463220
  0.96060000   2.02269064
  0.96060000   2.47462247
  0.96060000   2.02269512
  0.96060000   2.47461384
  0.96060000   2.02269905
  0.96060000   2.47460614
  0.96060000   2.02270253
  0.96060000   2.47459921
  0.96060000   2.02270563
  0.96060000   2.47459295
  0.96060000   2.02270840
  0.96060000   2.47458727
  0.96070000   2.47583276
  0.96070000   2.02124198
  0.96070000   2.47581229
  0.96070000   2.02125215
  0.96070000   2.47579511
  0.96070000   2.02126050
  0.96070000   2.47578048
  0.96070000   2.02126750
  0.96070000   2.47576785
  0.96070000   2.02127343
  0.96070000   2.47575685
  0.96070000   2.02127854
  0.96070000   2.47574717
  0.96070000   2.02128297
  0.96070000   2.47573858
  0.96070000   2.02128686
  0.96070000   2.47573091
  0.96070000   2.02129031
  0.96070000   2.47572402
  0.96070000   2.02129337
  0.96070000   2.47571779
  0.96070000   2.02129612
  0.96070000   2.47571214
  0.96080000   2.47695070
  0.96080000   2.01983736
  0.96080000   2.47693035
  0.96080000   2.01984741
  0.96080000   2.47691326
  0.96080000   2.01985567
  0.96080000   2.47689870
  0.96080000   2.01986258
  0.96080000   2.47688614
  0.96080000   2.01986845
  0.96080000   2.47687519
  0.96080000   2.01987350
  0.96080000   2.47686555
  0.96080000   2.01987789
  0.96080000   2.47685701
  0.96080000   2.01988174
  0.96080000   2.47684938
  0.96080000   2.01988515
  0.96080000   2.47684252
  0.96080000   2.01988819
  0.96080000   2.47683632
  0.96080000   2.01989091
  0.96080000   2.47683069
  0.96090000   2.47806245
  0.96090000   2.01843969
  0.96090000   2.47804222
  0.96090000   2.01844962
  0.96090000   2.47802522
  0.96090000   2.01845778
  0.96090000   2.47801073
  0.96090000   2.01846462
  0.96090000   2.47799823
  0.96090000   2.01847043
  0.96090000   2.47798734
  0.96090000   2.01847543
  0.96090000   2.47797775
  0.96090000   2.01847977
  0.96090000   2.47796924
  0.96090000   2.01848358
  0.96090000   2.47796164
  0.96090000   2.01848696
  0.96090000   2.47795481
  0.96090000   2.01848996
  0.96090000   2.47794864
  0.96090000   2.01849266
  0.96090000   2.47794304
  0.96100000   2.47916813
  0.96100000   2.01704886
  0.96100000   2.47914800
  0.96100000   2.01705867
  0.96100000   2.47913109
  0.96100000   2.01706674
  0.96100000   2.47911668
  0.96100000   2.01707351
  0.96100000   2.47910424
  0.96100000   2.01707925
  0.96100000   2.47909339
  0.96100000   2.01708420
  0.96100000   2.47908385
  0.96100000   2.01708850
  0.96100000   2.47907538
  0.96100000   2.01709227
  0.96100000   2.47906782
  0.96100000   2.01709561
  0.96100000   2.47906102
  0.96100000   2.01709859
  0.96100000   2.47905487
  0.96100000   2.01710126
  0.96100000   2.47904929
  0.96110000   2.48026782
  0.96110000   2.01566476
  0.96110000   2.48024780
  0.96110000   2.01567446
  0.96110000   2.48023098
  0.96110000   2.01568245
  0.96110000   2.48021664
  0.96110000   2.01568914
  0.96110000   2.48020426
  0.96110000   2.01569482
  0.96110000   2.48019347
  0.96110000   2.01569972
  0.96110000   2.48018397
  0.96110000   2.01570397
  0.96110000   2.48017554
  0.96110000   2.01570771
  0.96110000   2.48016801
  0.96110000   2.01571102
  0.96110000   2.48016124
  0.96110000   2.01571397
  0.96110000   2.48015512
  0.96110000   2.01571662
  0.96110000   2.48014956
  0.96120000   2.48136165
  0.96120000   2.01428730
  0.96120000   2.48134174
  0.96120000   2.01429689
  0.96120000   2.48132500
  0.96120000   2.01430479
  0.96120000   2.48131073
  0.96120000   2.01431141
  0.96120000   2.48129841
  0.96120000   2.01431704
  0.96120000   2.48128766
  0.96120000   2.01432188
  0.96120000   2.48127820
  0.96120000   2.01432610
  0.96120000   2.48126981
  0.96120000   2.01432980
  0.96120000   2.48126231
  0.96120000   2.01433308
  0.96120000   2.48125558
  0.96120000   2.01433600
  0.96120000   2.48124948
  0.96120000   2.01433862
  0.96120000   2.48124395
  0.96130000   2.48244970
  0.96130000   2.01291638
  0.96130000   2.48242989
  0.96130000   2.01292586
  0.96130000   2.48241324
  0.96130000   2.01293368
  0.96130000   2.48239903
  0.96130000   2.01294023
  0.96130000   2.48238677
  0.96130000   2.01294580
  0.96130000   2.48237607
  0.96130000   2.01295059
  0.96130000   2.48236666
  0.96130000   2.01295477
  0.96130000   2.48235830
  0.96130000   2.01295844
  0.96130000   2.48235084
  0.96130000   2.01296168
  0.96130000   2.48234413
  0.96130000   2.01296458
  0.96130000   2.48233806
  0.96130000   2.01296717
  0.96130000   2.48233255
  0.96140000   2.48353208
  0.96140000   2.01155190
  0.96140000   2.48351237
  0.96140000   2.01156128
  0.96140000   2.48349580
  0.96140000   2.01156901
  0.96140000   2.48348166
  0.96140000   2.01157549
  0.96140000   2.48346945
  0.96140000   2.01158101
  0.96140000   2.48345881
  0.96140000   2.01158576
  0.96140000   2.48344943
  0.96140000   2.01158989
  0.96140000   2.48344111
  0.96140000   2.01159352
  0.96140000   2.48343368
  0.96140000   2.01159674
  0.96140000   2.48342700
  0.96140000   2.01159961
  0.96140000   2.48342096
  0.96140000   2.01160218
  0.96140000   2.48341547
  0.96150000   2.48460888
  0.96150000   2.01019377
  0.96150000   2.48458927
  0.96150000   2.01020305
  0.96150000   2.48457277
  0.96150000   2.01021070
  0.96150000   2.48455870
  0.96150000   2.01021712
  0.96150000   2.48454655
  0.96150000   2.01022258
  0.96150000   2.48453595
  0.96150000   2.01022728
  0.96150000   2.48452662
  0.96150000   2.01023137
  0.96150000   2.48451834
  0.96150000   2.01023497
  0.96150000   2.48451094
  0.96150000   2.01023816
  0.96150000   2.48450428
  0.96150000   2.01024100
  0.96150000   2.48449827
  0.96150000   2.01024355
  0.96150000   2.48449280
  0.96160000   2.48568019
  0.96160000   2.00884190
  0.96160000   2.48566068
  0.96160000   2.00885108
  0.96160000   2.48564426
  0.96160000   2.00885865
  0.96160000   2.48563026
  0.96160000   2.00886500
  0.96160000   2.48561816
  0.96160000   2.00887041
  0.96160000   2.48560761
  0.96160000   2.00887507
  0.96160000   2.48559831
  0.96160000   2.00887913
  0.96160000   2.48559006
  0.96160000   2.00888269
  0.96160000   2.48558269
  0.96160000   2.00888585
  0.96160000   2.48557607
  0.96160000   2.00888867
  0.96160000   2.48557007
  0.96160000   2.00889119
  0.96160000   2.48556463
  0.96170000   2.48674611
  0.96170000   2.00749620
  0.96170000   2.48672669
  0.96170000   2.00750529
  0.96170000   2.48671035
  0.96170000   2.00751278
  0.96170000   2.48669641
  0.96170000   2.00751907
  0.96170000   2.48668436
  0.96170000   2.00752442
  0.96170000   2.48667386
  0.96170000   2.00752904
  0.96170000   2.48666460
  0.96170000   2.00753306
  0.96170000   2.48665639
  0.96170000   2.00753659
  0.96170000   2.48664905
  0.96170000   2.00753972
  0.96170000   2.48664245
  0.96170000   2.00754251
  0.96170000   2.48663648
  0.96170000   2.00754502
  0.96170000   2.48663106
  0.96180000   2.48780672
  0.96180000   2.00615659
  0.96180000   2.48778739
  0.96180000   2.00616558
  0.96180000   2.48777112
  0.96180000   2.00617300
  0.96180000   2.48775724
  0.96180000   2.00617923
  0.96180000   2.48774526
  0.96180000   2.00618453
  0.96180000   2.48773479
  0.96180000   2.00618910
  0.96180000   2.48772558
  0.96180000   2.00619309
  0.96180000   2.48771740
  0.96180000   2.00619658
  0.96180000   2.48771009
  0.96180000   2.00619969
  0.96180000   2.48770351
  0.96180000   2.00620245
  0.96180000   2.48769757
  0.96180000   2.00620494
  0.96180000   2.48769217
  0.96190000   2.48886210
  0.96190000   2.00482298
  0.96190000   2.48884287
  0.96190000   2.00483188
  0.96190000   2.48882668
  0.96190000   2.00483922
  0.96190000   2.48881286
  0.96190000   2.00484539
  0.96190000   2.48880092
  0.96190000   2.00485064
  0.96190000   2.48879050
  0.96190000   2.00485517
  0.96190000   2.48878132
  0.96190000   2.00485912
  0.96190000   2.48877318
  0.96190000   2.00486259
  0.96190000   2.48876590
  0.96190000   2.00486566
  0.96190000   2.48875935
  0.96190000   2.00486841
  0.96190000   2.48875343
  0.96190000   2.00487087
  0.96190000   2.48874805
  0.96200000   2.48991235
  0.96200000   2.00349529
  0.96200000   2.48989321
  0.96200000   2.00350410
  0.96200000   2.48987709
  0.96200000   2.00351137
  0.96200000   2.48986333
  0.96200000   2.00351748
  0.96200000   2.48985144
  0.96200000   2.00352268
  0.96200000   2.48984107
  0.96200000   2.00352717
  0.96200000   2.48983193
  0.96200000   2.00353108
  0.96200000   2.48982381
  0.96200000   2.00353452
  0.96200000   2.48981656
  0.96200000   2.00353757
  0.96200000   2.48981004
  0.96200000   2.00354029
  0.96200000   2.48980414
  0.96200000   2.00354273
  0.96200000   2.48979878
  0.96210000   2.49095755
  0.96210000   2.00217344
  0.96210000   2.49093849
  0.96210000   2.00218216
  0.96210000   2.49092244
  0.96210000   2.00218936
  0.96210000   2.49090874
  0.96210000   2.00219541
  0.96210000   2.49089691
  0.96210000   2.00220057
  0.96210000   2.49088657
  0.96210000   2.00220502
  0.96210000   2.49087747
  0.96210000   2.00220889
  0.96210000   2.49086939
  0.96210000   2.00221230
  0.96210000   2.49086216
  0.96210000   2.00221533
  0.96210000   2.49085567
  0.96210000   2.00221802
  0.96210000   2.49084979
  0.96210000   2.00222044
  0.96210000   2.49084445
  0.96220000   2.49199776
  0.96220000   2.00085735
  0.96220000   2.49197879
  0.96220000   2.00086598
  0.96220000   2.49196282
  0.96220000   2.00087312
  0.96220000   2.49194917
  0.96220000   2.00087911
  0.96220000   2.49193739
  0.96220000   2.00088422
  0.96220000   2.49192710
  0.96220000   2.00088863
  0.96220000   2.49191803
  0.96220000   2.00089248
  0.96220000   2.49190998
  0.96220000   2.00089586
  0.96220000   2.49190279
  0.96220000   2.00089885
  0.96220000   2.49189631
  0.96220000   2.00090152
  0.96220000   2.49189046
  0.96220000   2.00090393
  0.96220000   2.49188514
  0.96230000   2.49303309
  0.96230000   1.99954695
  0.96230000   2.49301420
  0.96230000   1.99955550
  0.96230000   2.49299829
  0.96230000   1.99956256
  0.96230000   2.49298471
  0.96230000   1.99956851
  0.96230000   2.49297297
  0.96230000   1.99957357
  0.96230000   2.49296272
  0.96230000   1.99957794
  0.96230000   2.49295369
  0.96230000   1.99958175
  0.96230000   2.49294567
  0.96230000   1.99958510
  0.96230000   2.49293850
  0.96230000   1.99958807
  0.96230000   2.49293205
  0.96230000   1.99959072
  0.96230000   2.49292622
  0.96230000   1.99959311
  0.96230000   2.49292092
  0.96240000   2.49406359
  0.96240000   1.99824216
  0.96240000   2.49404478
  0.96240000   1.99825063
  0.96240000   2.49402894
  0.96240000   1.99825763
  0.96240000   2.49401542
  0.96240000   1.99826352
  0.96240000   2.49400373
  0.96240000   1.99826853
  0.96240000   2.49399352
  0.96240000   1.99827287
  0.96240000   2.49398452
  0.96240000   1.99827664
  0.96240000   2.49397654
  0.96240000   1.99827997
  0.96240000   2.49396939
  0.96240000   1.99828291
  0.96240000   2.49396297
  0.96240000   1.99828554
  0.96240000   2.49395716
  0.96240000   1.99828791
  0.96240000   2.49395188
  0.96250000   2.49508934
  0.96250000   1.99694291
  0.96250000   2.49507062
  0.96250000   1.99695130
  0.96250000   2.49505485
  0.96250000   1.99695823
  0.96250000   2.49504138
  0.96250000   1.99696407
  0.96250000   2.49502973
  0.96250000   1.99696904
  0.96250000   2.49501956
  0.96250000   1.99697334
  0.96250000   2.49501060
  0.96250000   1.99697708
  0.96250000   2.49500265
  0.96250000   1.99698038
  0.96250000   2.49499553
  0.96250000   1.99698330
  0.96250000   2.49498913
  0.96250000   1.99698591
  0.96250000   2.49498335
  0.96250000   1.99698825
  0.96250000   2.49497808
  0.96260000   2.49611043
  0.96260000   1.99564913
  0.96260000   2.49609179
  0.96260000   1.99565744
  0.96260000   2.49607608
  0.96260000   1.99566431
  0.96260000   2.49606266
  0.96260000   1.99567009
  0.96260000   2.49605107
  0.96260000   1.99567503
  0.96260000   2.49604094
  0.96260000   1.99567928
  0.96260000   2.49603201
  0.96260000   1.99568300
  0.96260000   2.49602408
  0.96260000   1.99568626
  0.96260000   2.49601700
  0.96260000   1.99568916
  0.96260000   2.49601062
  0.96260000   1.99569175
  0.96260000   2.49600485
  0.96260000   1.99569408
  0.96260000   2.49599961
  0.96270000   2.49712691
  0.96270000   1.99436075
  0.96270000   2.49710835
  0.96270000   1.99436898
  0.96270000   2.49709271
  0.96270000   1.99437579
  0.96270000   2.49707935
  0.96270000   1.99438152
  0.96270000   2.49706779
  0.96270000   1.99438641
  0.96270000   2.49705770
  0.96270000   1.99439063
  0.96270000   2.49704881
  0.96270000   1.99439432
  0.96270000   2.49704091
  0.96270000   1.99439756
  0.96270000   2.49703385
  0.96270000   1.99440044
  0.96270000   2.49702750
  0.96270000   1.99440300
  0.96270000   2.49702175
  0.96270000   1.99440531
  0.96270000   2.49701653
  0.96280000   2.49813887
  0.96280000   1.99307770
  0.96280000   2.49812038
  0.96280000   1.99308585
  0.96280000   2.49810481
  0.96280000   1.99309260
  0.96280000   2.49809150
  0.96280000   1.99309829
  0.96280000   2.49807999
  0.96280000   1.99310314
  0.96280000   2.49806993
  0.96280000   1.99310732
  0.96280000   2.49806108
  0.96280000   1.99311098
  0.96280000   2.49805321
  0.96280000   1.99311419
  0.96280000   2.49804617
  0.96280000   1.99311704
  0.96280000   2.49803984
  0.96280000   1.99311959
  0.96280000   2.49803411
  0.96280000   1.99312188
  0.96280000   2.49802891
  0.96290000   2.49914636
  0.96290000   1.99179992
  0.96290000   2.49912795
  0.96290000   1.99180800
  0.96290000   2.49911244
  0.96290000   1.99181469
  0.96290000   2.49909918
  0.96290000   1.99182032
  0.96290000   2.49908772
  0.96290000   1.99182513
  0.96290000   2.49907770
  0.96290000   1.99182928
  0.96290000   2.49906887
  0.96290000   1.99183291
  0.96290000   2.49906103
  0.96290000   1.99183610
  0.96290000   2.49905402
  0.96290000   1.99183893
  0.96290000   2.49904772
  0.96290000   1.99184146
  0.96290000   2.49904201
  0.96290000   1.99184373
  0.96290000   2.49903682
  0.96300000   2.50014946
  0.96300000   1.99052734
  0.96300000   2.50013112
  0.96300000   1.99053534
  0.96300000   2.50011567
  0.96300000   1.99054198
  0.96300000   2.50010246
  0.96300000   1.99054756
  0.96300000   2.50009105
  0.96300000   1.99055233
  0.96300000   2.50008107
  0.96300000   1.99055645
  0.96300000   2.50007227
  0.96300000   1.99056005
  0.96300000   2.50006446
  0.96300000   1.99056321
  0.96300000   2.50005748
  0.96300000   1.99056602
  0.96300000   2.50005119
  0.96300000   1.99056853
  0.96300000   2.50004550
  0.96300000   1.99057078
  0.96300000   2.50004034
  0.96310000   2.50114823
  0.96310000   1.98925989
  0.96310000   2.50112997
  0.96310000   1.98926783
  0.96310000   2.50111458
  0.96310000   1.98927441
  0.96310000   2.50110142
  0.96310000   1.98927995
  0.96310000   2.50109004
  0.96310000   1.98928467
  0.96310000   2.50108010
  0.96310000   1.98928876
  0.96310000   2.50107134
  0.96310000   1.98929233
  0.96310000   2.50106356
  0.96310000   1.98929547
  0.96310000   2.50105659
  0.96310000   1.98929825
  0.96310000   2.50105033
  0.96310000   1.98930074
  0.96310000   2.50104466
  0.96310000   1.98930298
  0.96310000   2.50103951
  0.96320000   2.50214273
  0.96320000   1.98799753
  0.96320000   2.50212454
  0.96320000   1.98800539
  0.96320000   2.50210921
  0.96320000   1.98801191
  0.96320000   2.50209611
  0.96320000   1.98801741
  0.96320000   2.50208477
  0.96320000   1.98802210
  0.96320000   2.50207487
  0.96320000   1.98802615
  0.96320000   2.50206614
  0.96320000   1.98802969
  0.96320000   2.50205838
  0.96320000   1.98803281
  0.96320000   2.50205144
  0.96320000   1.98803557
  0.96320000   2.50204520
  0.96320000   1.98803804
  0.96320000   2.50203955
  0.96320000   1.98804027
  0.96320000   2.50203442
  0.96330000   2.50313303
  0.96330000   1.98674018
  0.96330000   2.50311492
  0.96330000   1.98674798
  0.96330000   2.50309964
  0.96330000   1.98675444
  0.96330000   2.50308659
  0.96330000   1.98675989
  0.96330000   2.50307529
  0.96330000   1.98676454
  0.96330000   2.50306543
  0.96330000   1.98676857
  0.96330000   2.50305673
  0.96330000   1.98677208
  0.96330000   2.50304900
  0.96330000   1.98677517
  0.96330000   2.50304208
  0.96330000   1.98677791
  0.96330000   2.50303586
  0.96330000   1.98678037
  0.96330000   2.50303023
  0.96330000   1.98678257
  0.96330000   2.50302512
  0.96340000   2.50411919
  0.96340000   1.98548779
  0.96340000   2.50410115
  0.96340000   1.98549552
  0.96340000   2.50408594
  0.96340000   1.98550193
  0.96340000   2.50407293
  0.96340000   1.98550733
  0.96340000   2.50406167
  0.96340000   1.98551195
  0.96340000   2.50405184
  0.96340000   1.98551594
  0.96340000   2.50404317
  0.96340000   1.98551942
  0.96340000   2.50403547
  0.96340000   1.98552249
  0.96340000   2.50402858
  0.96340000   1.98552522
  0.96340000   2.50402238
  0.96340000   1.98552765
  0.96340000   2.50401677
  0.96340000   1.98552984
  0.96340000   2.50401167
  0.96350000   2.50510127
  0.96350000   1.98424029
  0.96350000   2.50508330
  0.96350000   1.98424796
  0.96350000   2.50506814
  0.96350000   1.98425432
  0.96350000   2.50505518
  0.96350000   1.98425968
  0.96350000   2.50504397
  0.96350000   1.98426426
  0.96350000   2.50503417
  0.96350000   1.98426822
  0.96350000   2.50502553
  0.96350000   1.98427168
  0.96350000   2.50501786
  0.96350000   1.98427472
  0.96350000   2.50501099
  0.96350000   1.98427743
  0.96350000   2.50500481
  0.96350000   1.98427985
  0.96350000   2.50499922
  0.96350000   1.98428202
  0.96350000   2.50499414
  0.96360000   2.50607933
  0.96360000   1.98299764
  0.96360000   2.50606143
  0.96360000   1.98300524
  0.96360000   2.50604633
  0.96360000   1.98301155
  0.96360000   2.50603342
  0.96360000   1.98301687
  0.96360000   2.50602224
  0.96360000   1.98302141
  0.96360000   2.50601248
  0.96360000   1.98302534
  0.96360000   2.50600387
  0.96360000   1.98302878
  0.96360000   2.50599622
  0.96360000   1.98303180
  0.96360000   2.50598938
  0.96360000   1.98303449
  0.96360000   2.50598322
  0.96360000   1.98303689
  0.96360000   2.50597765
  0.96360000   1.98303905
  0.96360000   2.50597258
  0.96370000   2.50705343
  0.96370000   1.98175978
  0.96370000   2.50703559
  0.96370000   1.98176732
  0.96370000   2.50702055
  0.96370000   1.98177358
  0.96370000   2.50700768
  0.96370000   1.98177885
  0.96370000   2.50699655
  0.96370000   1.98178336
  0.96370000   2.50698682
  0.96370000   1.98178726
  0.96370000   2.50697824
  0.96370000   1.98179067
  0.96370000   2.50697062
  0.96370000   1.98179367
  0.96370000   2.50696380
  0.96370000   1.98179634
  0.96370000   2.50695766
  0.96370000   1.98179872
  0.96370000   2.50695210
  0.96370000   1.98180086
  0.96370000   2.50694705
  0.96380000   2.50802362
  0.96380000   1.98052665
  0.96380000   2.50800585
  0.96380000   1.98053413
  0.96380000   2.50799086
  0.96380000   1.98054034
  0.96380000   2.50797804
  0.96380000   1.98054557
  0.96380000   2.50796695
  0.96380000   1.98055005
  0.96380000   2.50795725
  0.96380000   1.98055392
  0.96380000   2.50794870
  0.96380000   1.98055730
  0.96380000   2.50794110
  0.96380000   1.98056028
  0.96380000   2.50793430
  0.96380000   1.98056293
  0.96380000   2.50792819
  0.96380000   1.98056529
  0.96380000   2.50792265
  0.96380000   1.98056742
  0.96380000   2.50791761
  0.96390000   2.50898995
  0.96390000   1.97929821
  0.96390000   2.50897226
  0.96390000   1.97930562
  0.96390000   2.50895732
  0.96390000   1.97931178
  0.96390000   2.50894455
  0.96390000   1.97931697
  0.96390000   2.50893349
  0.96390000   1.97932142
  0.96390000   2.50892383
  0.96390000   1.97932526
  0.96390000   2.50891531
  0.96390000   1.97932862
  0.96390000   2.50890773
  0.96390000   1.97933158
  0.96390000   2.50890096
  0.96390000   1.97933420
  0.96390000   2.50889486
  0.96390000   1.97933655
  0.96390000   2.50888934
  0.96390000   1.97933867
  0.96390000   2.50888432
  0.96400000   2.50995249
  0.96400000   1.97807439
  0.96400000   2.50993486
  0.96400000   1.97808174
  0.96400000   2.50991998
  0.96400000   1.97808785
  0.96400000   2.50990725
  0.96400000   1.97809301
  0.96400000   2.50989624
  0.96400000   1.97809742
  0.96400000   2.50988660
  0.96400000   1.97810123
  0.96400000   2.50987811
  0.96400000   1.97810457
  0.96400000   2.50987056
  0.96400000   1.97810750
  0.96400000   2.50986381
  0.96400000   1.97811011
  0.96400000   2.50985773
  0.96400000   1.97811244
  0.96400000   2.50985223
  0.96400000   1.97811455
  0.96400000   2.50984723
  0.96410000   2.51091130
  0.96410000   1.97685515
  0.96410000   2.51089373
  0.96410000   1.97686244
  0.96410000   2.51087890
  0.96410000   1.97686851
  0.96410000   2.51086621
  0.96410000   1.97687362
  0.96410000   2.51085524
  0.96410000   1.97687800
  0.96410000   2.51084563
  0.96410000   1.97688179
  0.96410000   2.51083717
  0.96410000   1.97688510
  0.96410000   2.51082965
  0.96410000   1.97688801
  0.96410000   2.51082292
  0.96410000   1.97689060
  0.96410000   2.51081685
  0.96410000   1.97689292
  0.96410000   2.51081137
  0.96410000   1.97689501
  0.96410000   2.51080638
  0.96420000   2.51186640
  0.96420000   1.97564043
  0.96420000   2.51184890
  0.96420000   1.97564767
  0.96420000   2.51183412
  0.96420000   1.97565369
  0.96420000   2.51182148
  0.96420000   1.97565877
  0.96420000   2.51181054
  0.96420000   1.97566311
  0.96420000   2.51180097
  0.96420000   1.97566687
  0.96420000   2.51179253
  0.96420000   1.97567016
  0.96420000   2.51178504
  0.96420000   1.97567305
  0.96420000   2.51177833
  0.96420000   1.97567563
  0.96420000   2.51177229
  0.96420000   1.97567793
  0.96420000   2.51176682
  0.96420000   1.97568000
  0.96420000   2.51176185
  0.96430000   2.51281787
  0.96430000   1.97443020
  0.96430000   2.51280043
  0.96430000   1.97443738
  0.96430000   2.51278571
  0.96430000   1.97444335
  0.96430000   2.51277311
  0.96430000   1.97444840
  0.96430000   2.51276221
  0.96430000   1.97445271
  0.96430000   2.51275267
  0.96430000   1.97445644
  0.96430000   2.51274426
  0.96430000   1.97445971
  0.96430000   2.51273678
  0.96430000   1.97446258
  0.96430000   2.51273010
  0.96430000   1.97446514
  0.96430000   2.51272407
  0.96430000   1.97446743
  0.96430000   2.51271862
  0.96430000   1.97446948
  0.96430000   2.51271367
  0.96440000   2.51376575
  0.96440000   1.97322440
  0.96440000   2.51374837
  0.96440000   1.97323152
  0.96440000   2.51373370
  0.96440000   1.97323745
  0.96440000   2.51372115
  0.96440000   1.97324246
  0.96440000   2.51371028
  0.96440000   1.97324674
  0.96440000   2.51370077
  0.96440000   1.97325045
  0.96440000   2.51369239
  0.96440000   1.97325369
  0.96440000   2.51368494
  0.96440000   1.97325654
  0.96440000   2.51367827
  0.96440000   1.97325908
  0.96440000   2.51367227
  0.96440000   1.97326135
  0.96440000   2.51366683
  0.96440000   1.97326340
  0.96440000   2.51366189
  0.96450000   2.51471010
  0.96450000   1.97202298
  0.96450000   2.51469278
  0.96450000   1.97203005
  0.96450000   2.51467816
  0.96450000   1.97203593
  0.96450000   2.51466564
  0.96450000   1.97204090
  0.96450000   2.51465481
  0.96450000   1.97204516
  0.96450000   2.51464534
  0.96450000   1.97204884
  0.96450000   2.51463698
  0.96450000   1.97205205
  0.96450000   2.51462955
  0.96450000   1.97205490
  0.96450000   2.51462290
  0.96450000   1.97205742
  0.96450000   2.51461692
  0.96450000   1.97205967
  0.96450000   2.51461150
  0.96450000   1.97206170
  0.96450000   2.51460657
  0.96460000   2.51565095
  0.96460000   1.97082590
  0.96460000   2.51563369
  0.96460000   1.97083292
  0.96460000   2.51561912
  0.96460000   1.97083876
  0.96460000   2.51560665
  0.96460000   1.97084369
  0.96460000   2.51559585
  0.96460000   1.97084792
  0.96460000   2.51558641
  0.96460000   1.97085157
  0.96460000   2.51557807
  0.96460000   1.97085477
  0.96460000   2.51557067
  0.96460000   1.97085759
  0.96460000   2.51556404
  0.96460000   1.97086009
  0.96460000   2.51555808
  0.96460000   1.97086234
  0.96460000   2.51555268
  0.96460000   1.97086435
  0.96460000   2.51554776
  0.96470000   2.51658835
  0.96470000   1.96963312
  0.96470000   2.51657116
  0.96470000   1.96964008
  0.96470000   2.51655664
  0.96470000   1.96964588
  0.96470000   2.51654421
  0.96470000   1.96965078
  0.96470000   2.51653344
  0.96470000   1.96965497
  0.96470000   2.51652403
  0.96470000   1.96965860
  0.96470000   2.51651572
  0.96470000   1.96966178
  0.96470000   2.51650834
  0.96470000   1.96966458
  0.96470000   2.51650174
  0.96470000   1.96966707
  0.96470000   2.51649579
  0.96470000   1.96966930
  0.96470000   2.51649040
  0.96470000   1.96967130
  0.96470000   2.51648551
  0.96480000   2.51752237
  0.96480000   1.96844458
  0.96480000   2.51750523
  0.96480000   1.96845150
  0.96480000   2.51749076
  0.96480000   1.96845725
  0.96480000   2.51747837
  0.96480000   1.96846212
  0.96480000   2.51746764
  0.96480000   1.96846628
  0.96480000   2.51745826
  0.96480000   1.96846989
  0.96480000   2.51744998
  0.96480000   1.96847304
  0.96480000   2.51744262
  0.96480000   1.96847582
  0.96480000   2.51743603
  0.96480000   1.96847830
  0.96480000   2.51743010
  0.96480000   1.96848051
  0.96480000   2.51742473
  0.96480000   1.96848250
  0.96480000   2.51741985
  0.96490000   2.51845303
  0.96490000   1.96726025
  0.96490000   2.51843595
  0.96490000   1.96726712
  0.96490000   2.51842153
  0.96490000   1.96727283
  0.96490000   2.51840918
  0.96490000   1.96727766
  0.96490000   2.51839848
  0.96490000   1.96728180
  0.96490000   2.51838913
  0.96490000   1.96728538
  0.96490000   2.51838088
  0.96490000   1.96728852
  0.96490000   2.51837354
  0.96490000   1.96729128
  0.96490000   2.51836697
  0.96490000   1.96729374
  0.96490000   2.51836106
  0.96490000   1.96729594
  0.96490000   2.51835571
  0.96490000   1.96729792
  0.96490000   2.51835084
  0.96500000   2.51938039
  0.96500000   1.96608009
  0.96500000   2.51936337
  0.96500000   1.96608690
  0.96500000   2.51934899
  0.96500000   1.96609258
  0.96500000   2.51933668
  0.96500000   1.96609737
  0.96500000   2.51932602
  0.96500000   1.96610148
  0.96500000   2.51931669
  0.96500000   1.96610504
  0.96500000   2.51930847
  0.96500000   1.96610815
  0.96500000   2.51930115
  0.96500000   1.96611090
  0.96500000   2.51929460
  0.96500000   1.96611334
  0.96500000   2.51928871
  0.96500000   1.96611553
  0.96500000   2.51928337
  0.96500000   1.96611750
  0.96500000   2.51927852
  0.96510000   2.52030448
  0.96510000   1.96490405
  0.96510000   2.52028752
  0.96510000   1.96491082
  0.96510000   2.52027319
  0.96510000   1.96491645
  0.96510000   2.52026092
  0.96510000   1.96492121
  0.96510000   2.52025029
  0.96510000   1.96492529
  0.96510000   2.52024100
  0.96510000   1.96492883
  0.96510000   2.52023279
  0.96510000   1.96493192
  0.96510000   2.52022550
  0.96510000   1.96493465
  0.96510000   2.52021897
  0.96510000   1.96493708
  0.96510000   2.52021309
  0.96510000   1.96493925
  0.96510000   2.52020777
  0.96510000   1.96494120
  0.96510000   2.52020293
  0.96520000   2.52122536
  0.96520000   1.96373209
  0.96520000   2.52120846
  0.96520000   1.96373881
  0.96520000   2.52119418
  0.96520000   1.96374440
  0.96520000   2.52118194
  0.96520000   1.96374913
  0.96520000   2.52117135
  0.96520000   1.96375319
  0.96520000   2.52116208
  0.96520000   1.96375670
  0.96520000   2.52115390
  0.96520000   1.96375977
  0.96520000   2.52114663
  0.96520000   1.96376249
  0.96520000   2.52114012
  0.96520000   1.96376490
  0.96520000   2.52113426
  0.96520000   1.96376705
  0.96520000   2.52112895
  0.96520000   1.96376900
  0.96520000   2.52112413
  0.96530000   2.52214307
  0.96530000   1.96256417
  0.96530000   2.52212622
  0.96530000   1.96257084
  0.96530000   2.52211198
  0.96530000   1.96257640
  0.96530000   2.52209979
  0.96530000   1.96258110
  0.96530000   2.52208923
  0.96530000   1.96258512
  0.96530000   2.52207999
  0.96530000   1.96258862
  0.96530000   2.52207184
  0.96530000   1.96259167
  0.96530000   2.52206458
  0.96530000   1.96259436
  0.96530000   2.52205809
  0.96530000   1.96259676
  0.96530000   2.52205225
  0.96530000   1.96259891
  0.96530000   2.52204696
  0.96530000   1.96260084
  0.96530000   2.52204214
  0.96540000   2.52305764
  0.96540000   1.96140026
  0.96540000   2.52304085
  0.96540000   1.96140688
  0.96540000   2.52302666
  0.96540000   1.96141240
  0.96540000   2.52301450
  0.96540000   1.96141707
  0.96540000   2.52300397
  0.96540000   1.96142107
  0.96540000   2.52299476
  0.96540000   1.96142454
  0.96540000   2.52298663
  0.96540000   1.96142757
  0.96540000   2.52297940
  0.96540000   1.96143025
  0.96540000   2.52297293
  0.96540000   1.96143263
  0.96540000   2.52296710
  0.96540000   1.96143477
  0.96540000   2.52296183
  0.96540000   1.96143669
  0.96540000   2.52295703
  0.96550000   2.52396912
  0.96550000   1.96024031
  0.96550000   2.52395238
  0.96550000   1.96024689
  0.96550000   2.52393824
  0.96550000   1.96025236
  0.96550000   2.52392612
  0.96550000   1.96025700
  0.96550000   2.52391563
  0.96550000   1.96026098
  0.96550000   2.52390644
  0.96550000   1.96026442
  0.96550000   2.52389833
  0.96550000   1.96026744
  0.96550000   2.52389113
  0.96550000   1.96027010
  0.96550000   2.52388467
  0.96550000   1.96027247
  0.96550000   2.52387886
  0.96550000   1.96027459
  0.96550000   2.52387360
  0.96550000   1.96027650
  0.96550000   2.52386882
  0.96560000   2.52487756
  0.96560000   1.95908428
  0.96560000   2.52486087
  0.96560000   1.95909081
  0.96560000   2.52484677
  0.96560000   1.95909626
  0.96560000   2.52483469
  0.96560000   1.95910087
  0.96560000   2.52482423
  0.96560000   1.95910482
  0.96560000   2.52481507
  0.96560000   1.95910824
  0.96560000   2.52480699
  0.96560000   1.95911124
  0.96560000   2.52479980
  0.96560000   1.95911388
  0.96560000   2.52479337
  0.96560000   1.95911624
  0.96560000   2.52478757
  0.96560000   1.95911834
  0.96560000   2.52478232
  0.96560000   1.95912024
  0.96560000   2.52477755
  0.96570000   2.52578298
  0.96570000   1.95793215
  0.96570000   2.52576635
  0.96570000   1.95793864
  0.96570000   2.52575229
  0.96570000   1.95794404
  0.96570000   2.52574025
  0.96570000   1.95794862
  0.96570000   2.52572981
  0.96570000   1.95795255
  0.96570000   2.52572068
  0.96570000   1.95795595
  0.96570000   2.52571263
  0.96570000   1.95795893
  0.96570000   2.52570546
  0.96570000   1.95796156
  0.96570000   2.52569904
  0.96570000   1.95796390
  0.96570000   2.52569326
  0.96570000   1.95796599
  0.96570000   2.52568803
  0.96570000   1.95796788
  0.96570000   2.52568327
[truncated: 201,033 more chars]
