# Supplementary material for: Bifurcations of a New Fractional-Order System with a One-Scroll Chaotic Attractor
Source: Hindawi journal article supplement (doi:10.1155/2019/8341514), 2019-01-01
Supplement: f1 [file 8341514.f1.zip › 8341514.f1/q1-bifurcationdata/q1dataq094.dat]

  0.90000000   2.00432508
  0.90000000   2.00431843
  0.90000000   2.00431250
  0.90000000   2.00430717
  0.90000000   2.00430235
  0.90000000   2.00429796
  0.90000000   2.00429396
  0.90000000   2.00429028
  0.90000000   2.00428689
  0.90000000   2.00428375
  0.90000000   2.00428085
  0.90000000   2.00427814
  0.90000000   2.00427562
  0.90000000   2.00427326
  0.90000000   2.00427104
  0.90000000   2.00426896
  0.90000000   2.00426700
  0.90000000   2.00426515
  0.90000000   2.00426341
  0.90000000   2.00426175
  0.90000000   2.00426018
  0.90000000   2.00425869
  0.90000000   2.00425728
  0.90010000   2.00560936
  0.90010000   2.00560273
  0.90010000   2.00559681
  0.90010000   2.00559148
  0.90010000   2.00558667
  0.90010000   2.00558229
  0.90010000   2.00557828
  0.90010000   2.00557460
  0.90010000   2.00557122
  0.90010000   2.00556808
  0.90010000   2.00556517
  0.90010000   2.00556247
  0.90010000   2.00555994
  0.90010000   2.00555758
  0.90010000   2.00555537
  0.90010000   2.00555329
  0.90010000   2.00555132
  0.90010000   2.00554948
  0.90010000   2.00554773
  0.90010000   2.00554607
  0.90010000   2.00554450
  0.90010000   2.00554301
  0.90010000   2.00554159
  0.90020000   2.00688659
  0.90020000   2.00687998
  0.90020000   2.00687406
  0.90020000   2.00686875
  0.90020000   2.00686393
  0.90020000   2.00685956
  0.90020000   2.00685555
  0.90020000   2.00685188
  0.90020000   2.00684849
  0.90020000   2.00684536
  0.90020000   2.00684245
  0.90020000   2.00683974
  0.90020000   2.00683722
  0.90020000   2.00683486
  0.90020000   2.00683264
  0.90020000   2.00683056
  0.90020000   2.00682860
  0.90020000   2.00682675
  0.90020000   2.00682500
  0.90020000   2.00682334
  0.90020000   2.00682177
  0.90020000   2.00682028
  0.90020000   2.00681886
  0.90030000   2.00815684
  0.90030000   2.00815024
  0.90030000   2.00814433
  0.90030000   2.00813902
  0.90030000   2.00813422
  0.90030000   2.00812984
  0.90030000   2.00812584
  0.90030000   2.00812217
  0.90030000   2.00811878
  0.90030000   2.00811565
  0.90030000   2.00811274
  0.90030000   2.00811003
  0.90030000   2.00810751
  0.90030000   2.00810515
  0.90030000   2.00810293
  0.90030000   2.00810085
  0.90030000   2.00809888
  0.90030000   2.00809703
  0.90030000   2.00809528
  0.90030000   2.00809362
  0.90030000   2.00809205
  0.90030000   2.00809056
  0.90030000   2.00808914
  0.90040000   2.00942017
  0.90040000   2.00941358
  0.90040000   2.00940768
  0.90040000   2.00940238
  0.90040000   2.00939758
  0.90040000   2.00939321
  0.90040000   2.00938921
  0.90040000   2.00938554
  0.90040000   2.00938215
  0.90040000   2.00937902
  0.90040000   2.00937611
  0.90040000   2.00937340
  0.90040000   2.00937088
  0.90040000   2.00936851
  0.90040000   2.00936630
  0.90040000   2.00936421
  0.90040000   2.00936225
  0.90040000   2.00936040
  0.90040000   2.00935864
  0.90040000   2.00935699
  0.90040000   2.00935541
  0.90040000   2.00935392
  0.90040000   2.00935250
  0.90050000   2.01067665
  0.90050000   2.01067007
  0.90050000   2.01066418
  0.90050000   2.01065888
  0.90050000   2.01065408
  0.90050000   2.01064971
  0.90050000   2.01064572
  0.90050000   2.01064205
  0.90050000   2.01063866
  0.90050000   2.01063553
  0.90050000   2.01063262
  0.90050000   2.01062992
  0.90050000   2.01062739
  0.90050000   2.01062503
  0.90050000   2.01062281
  0.90050000   2.01062072
  0.90050000   2.01061876
  0.90050000   2.01061690
  0.90050000   2.01061515
  0.90050000   2.01061349
  0.90050000   2.01061192
  0.90050000   2.01061042
  0.90050000   2.01060900
  0.90060000   2.01192633
  0.90060000   2.01191976
  0.90060000   2.01191388
  0.90060000   2.01190859
  0.90060000   2.01190380
  0.90060000   2.01189943
  0.90060000   2.01189544
  0.90060000   2.01189177
  0.90060000   2.01188839
  0.90060000   2.01188526
  0.90060000   2.01188235
  0.90060000   2.01187964
  0.90060000   2.01187711
  0.90060000   2.01187475
  0.90060000   2.01187253
  0.90060000   2.01187044
  0.90060000   2.01186848
  0.90060000   2.01186662
  0.90060000   2.01186487
  0.90060000   2.01186321
  0.90060000   2.01186163
  0.90060000   2.01186013
  0.90060000   2.01185871
  0.90070000   2.01316929
  0.90070000   2.01316273
  0.90070000   2.01315686
  0.90070000   2.01315157
  0.90070000   2.01314679
  0.90070000   2.01314242
  0.90070000   2.01313843
  0.90070000   2.01313476
  0.90070000   2.01313138
  0.90070000   2.01312825
  0.90070000   2.01312534
  0.90070000   2.01312263
  0.90070000   2.01312011
  0.90070000   2.01311774
  0.90070000   2.01311552
  0.90070000   2.01311343
  0.90070000   2.01311147
  0.90070000   2.01310961
  0.90070000   2.01310785
  0.90070000   2.01310619
  0.90070000   2.01310462
  0.90070000   2.01310312
  0.90070000   2.01310169
  0.90080000   2.01440558
  0.90080000   2.01439903
  0.90080000   2.01439317
  0.90080000   2.01438789
  0.90080000   2.01438311
  0.90080000   2.01437875
  0.90080000   2.01437476
  0.90080000   2.01437109
  0.90080000   2.01436771
  0.90080000   2.01436458
  0.90080000   2.01436167
  0.90080000   2.01435896
  0.90080000   2.01435643
  0.90080000   2.01435407
  0.90080000   2.01435184
  0.90080000   2.01434976
  0.90080000   2.01434779
  0.90080000   2.01434593
  0.90080000   2.01434417
  0.90080000   2.01434251
  0.90080000   2.01434093
  0.90080000   2.01433943
  0.90080000   2.01433801
  0.90090000   2.01563527
  0.90090000   2.01562873
  0.90090000   2.01562288
  0.90090000   2.01561760
  0.90090000   2.01561282
  0.90090000   2.01560847
  0.90090000   2.01560448
  0.90090000   2.01560081
  0.90090000   2.01559743
  0.90090000   2.01559430
  0.90090000   2.01559139
  0.90090000   2.01558868
  0.90090000   2.01558615
  0.90090000   2.01558379
  0.90090000   2.01558156
  0.90090000   2.01557947
  0.90090000   2.01557751
  0.90090000   2.01557565
  0.90090000   2.01557389
  0.90090000   2.01557223
  0.90090000   2.01557065
  0.90090000   2.01556915
  0.90090000   2.01556772
  0.90100000   2.01685841
  0.90100000   2.01685189
  0.90100000   2.01684604
  0.90100000   2.01684077
  0.90100000   2.01683599
  0.90100000   2.01683164
  0.90100000   2.01682765
  0.90100000   2.01682399
  0.90100000   2.01682061
  0.90100000   2.01681748
  0.90100000   2.01681457
  0.90100000   2.01681186
  0.90100000   2.01680933
  0.90100000   2.01680696
  0.90100000   2.01680474
  0.90100000   2.01680265
  0.90100000   2.01680068
  0.90100000   2.01679882
  0.90100000   2.01679706
  0.90100000   2.01679539
  0.90100000   2.01679381
  0.90100000   2.01679231
  0.90100000   2.01679088
  0.90110000   2.01807507
  0.90110000   2.01806856
  0.90110000   2.01806272
  0.90110000   2.01805745
  0.90110000   2.01805268
  0.90110000   2.01804833
  0.90110000   2.01804435
  0.90110000   2.01804068
  0.90110000   2.01803730
  0.90110000   2.01803417
  0.90110000   2.01803126
  0.90110000   2.01802855
  0.90110000   2.01802602
  0.90110000   2.01802365
  0.90110000   2.01802143
  0.90110000   2.01801934
  0.90110000   2.01801737
  0.90110000   2.01801551
  0.90110000   2.01801375
  0.90110000   2.01801208
  0.90110000   2.01801050
  0.90110000   2.01800899
  0.90110000   2.01800756
  0.90120000   2.01928531
  0.90120000   2.01927880
  0.90120000   2.01927297
  0.90120000   2.01926771
  0.90120000   2.01926294
  0.90120000   2.01925859
  0.90120000   2.01925461
  0.90120000   2.01925095
  0.90120000   2.01924757
  0.90120000   2.01924444
  0.90120000   2.01924153
  0.90120000   2.01923882
  0.90120000   2.01923629
  0.90120000   2.01923392
  0.90120000   2.01923169
  0.90120000   2.01922960
  0.90120000   2.01922763
  0.90120000   2.01922577
  0.90120000   2.01922401
  0.90120000   2.01922234
  0.90120000   2.01922075
  0.90120000   2.01921925
  0.90120000   2.01921782
  0.90130000   2.02048918
  0.90130000   2.02048268
  0.90130000   2.02047686
  0.90130000   2.02047160
  0.90130000   2.02046684
  0.90130000   2.02046249
  0.90130000   2.02045851
  0.90130000   2.02045485
  0.90130000   2.02045147
  0.90130000   2.02044834
  0.90130000   2.02044543
  0.90130000   2.02044272
  0.90130000   2.02044019
  0.90130000   2.02043782
  0.90130000   2.02043559
  0.90130000   2.02043350
  0.90130000   2.02043152
  0.90130000   2.02042966
  0.90130000   2.02042790
  0.90130000   2.02042623
  0.90130000   2.02042464
  0.90130000   2.02042314
  0.90130000   2.02042171
  0.90140000   2.02168674
  0.90140000   2.02168025
  0.90140000   2.02167443
  0.90140000   2.02166918
  0.90140000   2.02166442
  0.90140000   2.02166008
  0.90140000   2.02165610
  0.90140000   2.02165244
  0.90140000   2.02164906
  0.90140000   2.02164593
  0.90140000   2.02164302
  0.90140000   2.02164031
  0.90140000   2.02163777
  0.90140000   2.02163540
  0.90140000   2.02163318
  0.90140000   2.02163108
  0.90140000   2.02162911
  0.90140000   2.02162724
  0.90140000   2.02162548
  0.90140000   2.02162381
  0.90140000   2.02162222
  0.90140000   2.02162072
  0.90140000   2.02161928
  0.90150000   2.02287805
  0.90150000   2.02287157
  0.90150000   2.02286576
  0.90150000   2.02286051
  0.90150000   2.02285575
  0.90150000   2.02285141
  0.90150000   2.02284743
  0.90150000   2.02284377
  0.90150000   2.02284039
  0.90150000   2.02283726
  0.90150000   2.02283435
  0.90150000   2.02283164
  0.90150000   2.02282911
  0.90150000   2.02282674
  0.90150000   2.02282451
  0.90150000   2.02282241
  0.90150000   2.02282044
  0.90150000   2.02281857
  0.90150000   2.02281681
  0.90150000   2.02281513
  0.90150000   2.02281355
  0.90150000   2.02281204
  0.90150000   2.02281061
  0.90160000   2.02406316
  0.90160000   2.02405669
  0.90160000   2.02405088
  0.90160000   2.02404564
  0.90160000   2.02404089
  0.90160000   2.02403655
  0.90160000   2.02403257
  0.90160000   2.02402891
  0.90160000   2.02402553
  0.90160000   2.02402240
  0.90160000   2.02401949
  0.90160000   2.02401678
  0.90160000   2.02401425
  0.90160000   2.02401187
  0.90160000   2.02400964
  0.90160000   2.02400755
  0.90160000   2.02400557
  0.90160000   2.02400370
  0.90160000   2.02400194
  0.90160000   2.02400026
  0.90160000   2.02399868
  0.90160000   2.02399717
  0.90160000   2.02399573
  0.90170000   2.02524213
  0.90170000   2.02523567
  0.90170000   2.02522987
  0.90170000   2.02522463
  0.90170000   2.02521988
  0.90170000   2.02521554
  0.90170000   2.02521157
  0.90170000   2.02520791
  0.90170000   2.02520453
  0.90170000   2.02520140
  0.90170000   2.02519849
  0.90170000   2.02519578
  0.90170000   2.02519324
  0.90170000   2.02519087
  0.90170000   2.02518864
  0.90170000   2.02518654
  0.90170000   2.02518456
  0.90170000   2.02518269
  0.90170000   2.02518093
  0.90170000   2.02517925
  0.90170000   2.02517766
  0.90170000   2.02517615
  0.90170000   2.02517471
  0.90180000   2.02641501
  0.90180000   2.02640856
  0.90180000   2.02640277
  0.90180000   2.02639753
  0.90180000   2.02639278
  0.90180000   2.02638845
  0.90180000   2.02638447
  0.90180000   2.02638082
  0.90180000   2.02637744
  0.90180000   2.02637431
  0.90180000   2.02637140
  0.90180000   2.02636868
  0.90180000   2.02636615
  0.90180000   2.02636377
  0.90180000   2.02636154
  0.90180000   2.02635944
  0.90180000   2.02635746
  0.90180000   2.02635559
  0.90180000   2.02635383
  0.90180000   2.02635215
  0.90180000   2.02635056
  0.90180000   2.02634905
  0.90180000   2.02634761
  0.90190000   2.02758186
  0.90190000   2.02757542
  0.90190000   2.02756963
  0.90190000   2.02756440
  0.90190000   2.02755965
  0.90190000   2.02755532
  0.90190000   2.02755135
  0.90190000   2.02754769
  0.90190000   2.02754431
  0.90190000   2.02754118
  0.90190000   2.02753827
  0.90190000   2.02753556
  0.90190000   2.02753302
  0.90190000   2.02753064
  0.90190000   2.02752841
  0.90190000   2.02752631
  0.90190000   2.02752433
  0.90190000   2.02752246
  0.90190000   2.02752069
  0.90190000   2.02751901
  0.90190000   2.02751742
  0.90190000   2.02751591
  0.90190000   2.02751447
  0.90200000   2.02874273
  0.90200000   2.02873629
  0.90200000   2.02873051
  0.90200000   2.02872529
  0.90200000   2.02872055
  0.90200000   2.02871621
  0.90200000   2.02871224
  0.90200000   2.02870859
  0.90200000   2.02870521
  0.90200000   2.02870208
  0.90200000   2.02869916
  0.90200000   2.02869645
  0.90200000   2.02869391
  0.90200000   2.02869153
  0.90200000   2.02868930
  0.90200000   2.02868720
  0.90200000   2.02868522
  0.90200000   2.02868335
  0.90200000   2.02868158
  0.90200000   2.02867990
  0.90200000   2.02867831
  0.90200000   2.02867679
  0.90200000   2.02867535
  0.90210000   2.02989767
  0.90210000   2.02989124
  0.90210000   2.02988547
  0.90210000   2.02988025
  0.90210000   2.02987551
  0.90210000   2.02987118
  0.90210000   2.02986721
  0.90210000   2.02986355
  0.90210000   2.02986017
  0.90210000   2.02985704
  0.90210000   2.02985413
  0.90210000   2.02985141
  0.90210000   2.02984888
  0.90210000   2.02984650
  0.90210000   2.02984426
  0.90210000   2.02984216
  0.90210000   2.02984018
  0.90210000   2.02983831
  0.90210000   2.02983653
  0.90210000   2.02983485
  0.90210000   2.02983326
  0.90210000   2.02983175
  0.90210000   2.02983030
  0.90220000   2.03104674
  0.90220000   2.03104032
  0.90220000   2.03103455
  0.90220000   2.03102933
  0.90220000   2.03102459
  0.90220000   2.03102027
  0.90220000   2.03101630
  0.90220000   2.03101264
  0.90220000   2.03100926
  0.90220000   2.03100613
  0.90220000   2.03100322
  0.90220000   2.03100050
  0.90220000   2.03099796
  0.90220000   2.03099558
  0.90220000   2.03099335
  0.90220000   2.03099125
  0.90220000   2.03098926
  0.90220000   2.03098739
  0.90220000   2.03098561
  0.90220000   2.03098393
  0.90220000   2.03098234
  0.90220000   2.03098082
  0.90220000   2.03097938
  0.90230000   2.03218998
  0.90230000   2.03218357
  0.90230000   2.03217781
  0.90230000   2.03217259
  0.90230000   2.03216786
  0.90230000   2.03216353
  0.90230000   2.03215956
  0.90230000   2.03215591
  0.90230000   2.03215253
  0.90230000   2.03214940
  0.90230000   2.03214648
  0.90230000   2.03214377
  0.90230000   2.03214123
  0.90230000   2.03213885
  0.90230000   2.03213661
  0.90230000   2.03213450
  0.90230000   2.03213252
  0.90230000   2.03213064
  0.90230000   2.03212887
  0.90230000   2.03212719
  0.90230000   2.03212559
  0.90230000   2.03212407
  0.90230000   2.03212263
  0.90240000   2.03332745
  0.90240000   2.03332105
  0.90240000   2.03331529
  0.90240000   2.03331008
  0.90240000   2.03330534
  0.90240000   2.03330102
  0.90240000   2.03329705
  0.90240000   2.03329340
  0.90240000   2.03329002
  0.90240000   2.03328689
  0.90240000   2.03328397
  0.90240000   2.03328126
  0.90240000   2.03327871
  0.90240000   2.03327633
  0.90240000   2.03327410
  0.90240000   2.03327199
  0.90240000   2.03327000
  0.90240000   2.03326813
  0.90240000   2.03326635
  0.90240000   2.03326467
  0.90240000   2.03326307
  0.90240000   2.03326155
  0.90240000   2.03326011
  0.90250000   2.03445920
  0.90250000   2.03445280
  0.90250000   2.03444704
  0.90250000   2.03444184
  0.90250000   2.03443711
  0.90250000   2.03443278
  0.90250000   2.03442882
  0.90250000   2.03442516
  0.90250000   2.03442179
  0.90250000   2.03441865
  0.90250000   2.03441574
  0.90250000   2.03441302
  0.90250000   2.03441048
  0.90250000   2.03440810
  0.90250000   2.03440586
  0.90250000   2.03440375
  0.90250000   2.03440176
  0.90250000   2.03439989
  0.90250000   2.03439811
  0.90250000   2.03439642
  0.90250000   2.03439482
  0.90250000   2.03439330
  0.90250000   2.03439186
  0.90260000   2.03558527
  0.90260000   2.03557888
  0.90260000   2.03557313
  0.90260000   2.03556793
  0.90260000   2.03556320
  0.90260000   2.03555887
  0.90260000   2.03555491
  0.90260000   2.03555125
  0.90260000   2.03554788
  0.90260000   2.03554474
  0.90260000   2.03554183
  0.90260000   2.03553911
  0.90260000   2.03553657
  0.90260000   2.03553418
  0.90260000   2.03553194
  0.90260000   2.03552983
  0.90260000   2.03552785
  0.90260000   2.03552597
  0.90260000   2.03552419
  0.90260000   2.03552250
  0.90260000   2.03552090
  0.90260000   2.03551938
  0.90260000   2.03551793
  0.90270000   2.03670571
  0.90270000   2.03669933
  0.90270000   2.03669358
  0.90270000   2.03668839
  0.90270000   2.03668366
  0.90270000   2.03667934
  0.90270000   2.03667537
  0.90270000   2.03667172
  0.90270000   2.03666834
  0.90270000   2.03666521
  0.90270000   2.03666229
  0.90270000   2.03665957
  0.90270000   2.03665703
  0.90270000   2.03665464
  0.90270000   2.03665240
  0.90270000   2.03665029
  0.90270000   2.03664830
  0.90270000   2.03664642
  0.90270000   2.03664464
  0.90270000   2.03664296
  0.90270000   2.03664136
  0.90270000   2.03663983
  0.90270000   2.03663838
  0.90280000   2.03782058
  0.90280000   2.03781420
  0.90280000   2.03780846
  0.90280000   2.03780327
  0.90280000   2.03779854
  0.90280000   2.03779422
  0.90280000   2.03779026
  0.90280000   2.03778661
  0.90280000   2.03778323
  0.90280000   2.03778009
  0.90280000   2.03777718
  0.90280000   2.03777446
  0.90280000   2.03777191
  0.90280000   2.03776953
  0.90280000   2.03776728
  0.90280000   2.03776517
  0.90280000   2.03776318
  0.90280000   2.03776130
  0.90280000   2.03775952
  0.90280000   2.03775783
  0.90280000   2.03775623
  0.90280000   2.03775471
  0.90280000   2.03775325
  0.90290000   2.03892992
  0.90290000   2.03892354
  0.90290000   2.03891781
  0.90290000   2.03891262
  0.90290000   2.03890790
  0.90290000   2.03890358
  0.90290000   2.03889961
  0.90290000   2.03889596
  0.90290000   2.03889258
  0.90290000   2.03888945
  0.90290000   2.03888653
  0.90290000   2.03888381
  0.90290000   2.03888126
  0.90290000   2.03887888
  0.90290000   2.03887663
  0.90290000   2.03887452
  0.90290000   2.03887253
  0.90290000   2.03887065
  0.90290000   2.03886887
  0.90290000   2.03886718
  0.90290000   2.03886557
  0.90290000   2.03886405
  0.90290000   2.03886259
  0.90300000   2.04003377
  0.90300000   2.04002740
  0.90300000   2.04002167
  0.90300000   2.04001649
  0.90300000   2.04001177
  0.90300000   2.04000745
  0.90300000   2.04000349
  0.90300000   2.03999983
  0.90300000   2.03999645
  0.90300000   2.03999332
  0.90300000   2.03999040
  0.90300000   2.03998768
  0.90300000   2.03998513
  0.90300000   2.03998274
  0.90300000   2.03998050
  0.90300000   2.03997839
  0.90300000   2.03997639
  0.90300000   2.03997451
  0.90300000   2.03997273
  0.90300000   2.03997104
  0.90300000   2.03996943
  0.90300000   2.03996790
  0.90300000   2.03996645
  0.90310000   2.04113219
  0.90310000   2.04112583
  0.90310000   2.04112010
  0.90310000   2.04111492
  0.90310000   2.04111020
  0.90310000   2.04110588
  0.90310000   2.04110192
  0.90310000   2.04109827
  0.90310000   2.04109489
  0.90310000   2.04109175
  0.90310000   2.04108883
  0.90310000   2.04108611
  0.90310000   2.04108356
  0.90310000   2.04108117
  0.90310000   2.04107893
  0.90310000   2.04107682
  0.90310000   2.04107482
  0.90310000   2.04107294
  0.90310000   2.04107115
  0.90310000   2.04106946
  0.90310000   2.04106785
  0.90310000   2.04106632
  0.90310000   2.04106487
  0.90320000   2.04222522
  0.90320000   2.04221886
  0.90320000   2.04221314
  0.90320000   2.04220796
  0.90320000   2.04220324
  0.90320000   2.04219892
  0.90320000   2.04219496
  0.90320000   2.04219131
  0.90320000   2.04218793
  0.90320000   2.04218479
  0.90320000   2.04218188
  0.90320000   2.04217915
  0.90320000   2.04217660
  0.90320000   2.04217421
  0.90320000   2.04217197
  0.90320000   2.04216985
  0.90320000   2.04216786
  0.90320000   2.04216597
  0.90320000   2.04216418
  0.90320000   2.04216249
  0.90320000   2.04216088
  0.90320000   2.04215935
  0.90320000   2.04215790
  0.90330000   2.04331290
  0.90330000   2.04330655
  0.90330000   2.04330083
  0.90330000   2.04329565
  0.90330000   2.04329093
  0.90330000   2.04328662
  0.90330000   2.04328266
  0.90330000   2.04327901
  0.90330000   2.04327563
  0.90330000   2.04327249
  0.90330000   2.04326957
  0.90330000   2.04326685
  0.90330000   2.04326430
  0.90330000   2.04326190
  0.90330000   2.04325966
  0.90330000   2.04325754
  0.90330000   2.04325554
  0.90330000   2.04325366
  0.90330000   2.04325187
  0.90330000   2.04325018
  0.90330000   2.04324857
  0.90330000   2.04324704
  0.90330000   2.04324558
  0.90340000   2.04439527
  0.90340000   2.04438893
  0.90340000   2.04438322
  0.90340000   2.04437804
  0.90340000   2.04437333
  0.90340000   2.04436901
  0.90340000   2.04436505
  0.90340000   2.04436140
  0.90340000   2.04435802
  0.90340000   2.04435488
  0.90340000   2.04435196
  0.90340000   2.04434924
  0.90340000   2.04434669
  0.90340000   2.04434430
  0.90340000   2.04434205
  0.90340000   2.04433993
  0.90340000   2.04433793
  0.90340000   2.04433604
  0.90340000   2.04433425
  0.90340000   2.04433256
  0.90340000   2.04433095
  0.90340000   2.04432942
  0.90340000   2.04432796
  0.90350000   2.04547240
  0.90350000   2.04546606
  0.90350000   2.04546035
  0.90350000   2.04545518
  0.90350000   2.04545046
  0.90350000   2.04544615
  0.90350000   2.04544219
  0.90350000   2.04543854
  0.90350000   2.04543516
  0.90350000   2.04543202
  0.90350000   2.04542910
  0.90350000   2.04542637
  0.90350000   2.04542382
  0.90350000   2.04542143
  0.90350000   2.04541918
  0.90350000   2.04541706
  0.90350000   2.04541506
  0.90350000   2.04541317
  0.90350000   2.04541138
  0.90350000   2.04540968
  0.90350000   2.04540807
  0.90350000   2.04540654
  0.90350000   2.04540508
  0.90360000   2.04654431
  0.90360000   2.04653797
  0.90360000   2.04653227
  0.90360000   2.04652710
  0.90360000   2.04652239
  0.90360000   2.04651808
  0.90360000   2.04651412
  0.90360000   2.04651046
  0.90360000   2.04650708
  0.90360000   2.04650394
  0.90360000   2.04650102
  0.90360000   2.04649829
  0.90360000   2.04649574
  0.90360000   2.04649335
  0.90360000   2.04649110
  0.90360000   2.04648898
  0.90360000   2.04648698
  0.90360000   2.04648508
  0.90360000   2.04648329
  0.90360000   2.04648160
  0.90360000   2.04647998
  0.90360000   2.04647845
  0.90360000   2.04647699
  0.90370000   2.04761105
  0.90370000   2.04760472
  0.90370000   2.04759902
  0.90370000   2.04759385
  0.90370000   2.04758914
  0.90370000   2.04758483
  0.90370000   2.04758087
  0.90370000   2.04757722
  0.90370000   2.04757384
  0.90370000   2.04757070
  0.90370000   2.04756777
  0.90370000   2.04756505
  0.90370000   2.04756249
  0.90370000   2.04756010
  0.90370000   2.04755784
  0.90370000   2.04755572
  0.90370000   2.04755372
  0.90370000   2.04755183
  0.90370000   2.04755004
  0.90370000   2.04754834
  0.90370000   2.04754672
  0.90370000   2.04754519
  0.90370000   2.04754372
  0.90380000   2.04867266
  0.90380000   2.04866634
  0.90380000   2.04866064
  0.90380000   2.04865547
  0.90380000   2.04865076
  0.90380000   2.04864645
  0.90380000   2.04864249
  0.90380000   2.04863884
  0.90380000   2.04863546
  0.90380000   2.04863232
  0.90380000   2.04862940
  0.90380000   2.04862667
  0.90380000   2.04862411
  0.90380000   2.04862172
  0.90380000   2.04861946
  0.90380000   2.04861734
  0.90380000   2.04861534
  0.90380000   2.04861344
  0.90380000   2.04861165
  0.90380000   2.04860995
  0.90380000   2.04860833
  0.90380000   2.04860680
  0.90380000   2.04860533
  0.90390000   2.04972918
  0.90390000   2.04972287
  0.90390000   2.04971717
  0.90390000   2.04971201
  0.90390000   2.04970730
  0.90390000   2.04970299
  0.90390000   2.04969903
  0.90390000   2.04969538
  0.90390000   2.04969200
  0.90390000   2.04968886
  0.90390000   2.04968594
  0.90390000   2.04968321
  0.90390000   2.04968065
  0.90390000   2.04967825
  0.90390000   2.04967600
  0.90390000   2.04967387
  0.90390000   2.04967187
  0.90390000   2.04966997
  0.90390000   2.04966818
  0.90390000   2.04966648
  0.90390000   2.04966486
  0.90390000   2.04966332
  0.90390000   2.04966186
  0.90400000   2.05078067
  0.90400000   2.05077435
  0.90400000   2.05076866
  0.90400000   2.05076350
  0.90400000   2.05075880
  0.90400000   2.05075449
  0.90400000   2.05075053
  0.90400000   2.05074688
  0.90400000   2.05074350
  0.90400000   2.05074035
  0.90400000   2.05073743
  0.90400000   2.05073470
  0.90400000   2.05073214
  0.90400000   2.05072974
  0.90400000   2.05072749
  0.90400000   2.05072536
  0.90400000   2.05072336
  0.90400000   2.05072146
  0.90400000   2.05071966
  0.90400000   2.05071796
  0.90400000   2.05071634
  0.90400000   2.05071480
  0.90400000   2.05071334
  0.90410000   2.05182715
  0.90410000   2.05182084
  0.90410000   2.05181515
  0.90410000   2.05180999
  0.90410000   2.05180529
  0.90410000   2.05180098
  0.90410000   2.05179702
  0.90410000   2.05179337
  0.90410000   2.05178999
  0.90410000   2.05178685
  0.90410000   2.05178392
  0.90410000   2.05178119
  0.90410000   2.05177863
  0.90410000   2.05177623
  0.90410000   2.05177397
  0.90410000   2.05177185
  0.90410000   2.05176984
  0.90410000   2.05176794
  0.90410000   2.05176615
  0.90410000   2.05176444
  0.90410000   2.05176282
  0.90410000   2.05176128
  0.90410000   2.05175981
  0.90420000   2.05286867
  0.90420000   2.05286236
  0.90420000   2.05285668
  0.90420000   2.05285152
  0.90420000   2.05284682
  0.90420000   2.05284251
  0.90420000   2.05283855
  0.90420000   2.05283490
  0.90420000   2.05283152
  0.90420000   2.05282838
  0.90420000   2.05282545
  0.90420000   2.05282272
  0.90420000   2.05282016
  0.90420000   2.05281776
  0.90420000   2.05281550
  0.90420000   2.05281337
  0.90420000   2.05281136
  0.90420000   2.05280946
  0.90420000   2.05280766
  0.90420000   2.05280596
  0.90420000   2.05280434
  0.90420000   2.05280280
  0.90420000   2.05280133
  0.90430000   2.05390526
  0.90430000   2.05389896
  0.90430000   2.05389328
  0.90430000   2.05388813
  0.90430000   2.05388343
  0.90430000   2.05387912
  0.90430000   2.05387516
  0.90430000   2.05387151
  0.90430000   2.05386813
  0.90430000   2.05386498
  0.90430000   2.05386206
  0.90430000   2.05385932
  0.90430000   2.05385676
  0.90430000   2.05385436
  0.90430000   2.05385210
  0.90430000   2.05384997
  0.90430000   2.05384796
  0.90430000   2.05384606
  0.90430000   2.05384426
  0.90430000   2.05384256
  0.90430000   2.05384093
  0.90430000   2.05383939
  0.90430000   2.05383792
  0.90440000   2.05493698
  0.90440000   2.05493068
  0.90440000   2.05492501
  0.90440000   2.05491985
  0.90440000   2.05491515
  0.90440000   2.05491085
  0.90440000   2.05490689
  0.90440000   2.05490324
  0.90440000   2.05489985
  0.90440000   2.05489671
  0.90440000   2.05489378
  0.90440000   2.05489105
  0.90440000   2.05488848
  0.90440000   2.05488608
  0.90440000   2.05488382
  0.90440000   2.05488169
  0.90440000   2.05487968
  0.90440000   2.05487778
  0.90440000   2.05487598
  0.90440000   2.05487427
  0.90440000   2.05487265
  0.90440000   2.05487110
  0.90440000   2.05486963
  0.90450000   2.05596385
  0.90450000   2.05595756
  0.90450000   2.05595189
  0.90450000   2.05594673
  0.90450000   2.05594204
  0.90450000   2.05593773
  0.90450000   2.05593377
  0.90450000   2.05593012
  0.90450000   2.05592674
  0.90450000   2.05592359
  0.90450000   2.05592066
  0.90450000   2.05591793
  0.90450000   2.05591536
  0.90450000   2.05591296
  0.90450000   2.05591070
  0.90450000   2.05590857
  0.90450000   2.05590655
  0.90450000   2.05590465
  0.90450000   2.05590285
  0.90450000   2.05590114
  0.90450000   2.05589952
  0.90450000   2.05589797
  0.90450000   2.05589650
  0.90460000   2.05698592
  0.90460000   2.05697963
  0.90460000   2.05697396
  0.90460000   2.05696881
  0.90460000   2.05696412
  0.90460000   2.05695981
  0.90460000   2.05695585
  0.90460000   2.05695220
  0.90460000   2.05694881
  0.90460000   2.05694567
  0.90460000   2.05694274
  0.90460000   2.05694000
  0.90460000   2.05693744
  0.90460000   2.05693503
  0.90460000   2.05693277
  0.90460000   2.05693064
  0.90460000   2.05692862
  0.90460000   2.05692672
  0.90460000   2.05692492
  0.90460000   2.05692321
  0.90460000   2.05692158
  0.90460000   2.05692003
  0.90460000   2.05691856
  0.90470000   2.05801022
  0.90470000   2.05800322
  0.90470000   2.05799694
  0.90470000   2.05799127
  0.90470000   2.05798612
  0.90470000   2.05798143
  0.90470000   2.05797713
  0.90470000   2.05797317
  0.90470000   2.05796951
  0.90470000   2.05796613
  0.90470000   2.05796298
  0.90470000   2.05796005
  0.90470000   2.05795731
  0.90470000   2.05795475
  0.90470000   2.05795234
  0.90470000   2.05795008
  0.90470000   2.05794794
  0.90470000   2.05794593
  0.90470000   2.05794402
  0.90470000   2.05794222
  0.90470000   2.05794051
  0.90470000   2.05793888
  0.90470000   2.05793733
  0.90470000   2.05793586
  0.90480000   2.05902279
  0.90480000   2.05901580
  0.90480000   2.05900952
  0.90480000   2.05900386
  0.90480000   2.05899871
  0.90480000   2.05899401
  0.90480000   2.05898971
  0.90480000   2.05898575
  0.90480000   2.05898210
  0.90480000   2.05897871
  0.90480000   2.05897557
  0.90480000   2.05897263
  0.90480000   2.05896990
  0.90480000   2.05896733
  0.90480000   2.05896492
  0.90480000   2.05896266
  0.90480000   2.05896052
  0.90480000   2.05895851
  0.90480000   2.05895660
  0.90480000   2.05895479
  0.90480000   2.05895308
  0.90480000   2.05895145
  0.90480000   2.05894990
  0.90480000   2.05894843
  0.90490000   2.06003067
  0.90490000   2.06002369
  0.90490000   2.06001741
  0.90490000   2.06001175
  0.90490000   2.06000660
  0.90490000   2.06000191
  0.90490000   2.05999761
  0.90490000   2.05999365
  0.90490000   2.05999000
  0.90490000   2.05998661
  0.90490000   2.05998346
  0.90490000   2.05998053
  0.90490000   2.05997779
  0.90490000   2.05997522
  0.90490000   2.05997281
  0.90490000   2.05997055
  0.90490000   2.05996841
  0.90490000   2.05996639
  0.90490000   2.05996449
  0.90490000   2.05996268
  0.90490000   2.05996096
  0.90490000   2.05995933
  0.90490000   2.05995778
  0.90490000   2.05995631
  0.90500000   2.06103390
  0.90500000   2.06102692
  0.90500000   2.06102065
  0.90500000   2.06101499
  0.90500000   2.06100985
  0.90500000   2.06100515
  0.90500000   2.06100085
  0.90500000   2.06099689
  0.90500000   2.06099324
  0.90500000   2.06098985
  0.90500000   2.06098670
  0.90500000   2.06098377
  0.90500000   2.06098103
  0.90500000   2.06097846
  0.90500000   2.06097605
  0.90500000   2.06097378
  0.90500000   2.06097164
  0.90500000   2.06096963
  0.90500000   2.06096772
  0.90500000   2.06096591
  0.90500000   2.06096419
  0.90500000   2.06096256
  0.90500000   2.06096101
  0.90500000   2.06095953
  0.90510000   2.06203251
  0.90510000   2.06202554
  0.90510000   2.06201927
  0.90510000   2.06201361
  0.90510000   2.06200847
  0.90510000   2.06200378
  0.90510000   2.06199948
  0.90510000   2.06199552
  0.90510000   2.06199186
  0.90510000   2.06198848
  0.90510000   2.06198533
  0.90510000   2.06198239
  0.90510000   2.06197965
  0.90510000   2.06197708
  0.90510000   2.06197467
  0.90510000   2.06197240
  0.90510000   2.06197026
  0.90510000   2.06196824
  0.90510000   2.06196633
  0.90510000   2.06196452
  0.90510000   2.06196281
  0.90510000   2.06196117
  0.90510000   2.06195962
  0.90510000   2.06195814
  0.90520000   2.06302655
  0.90520000   2.06301958
  0.90520000   2.06301331
  0.90520000   2.06300766
  0.90520000   2.06300252
  0.90520000   2.06299783
  0.90520000   2.06299353
  0.90520000   2.06298957
  0.90520000   2.06298591
  0.90520000   2.06298252
  0.90520000   2.06297937
  0.90520000   2.06297644
  0.90520000   2.06297369
  0.90520000   2.06297112
  0.90520000   2.06296871
  0.90520000   2.06296644
  0.90520000   2.06296430
  0.90520000   2.06296228
  0.90520000   2.06296037
  0.90520000   2.06295856
  0.90520000   2.06295684
  0.90520000   2.06295521
  0.90520000   2.06295365
  0.90520000   2.06295217
  0.90530000   2.06401604
  0.90530000   2.06400907
  0.90530000   2.06400281
  0.90530000   2.06399716
  0.90530000   2.06399202
  0.90530000   2.06398733
  0.90530000   2.06398303
  0.90530000   2.06397907
  0.90530000   2.06397541
  0.90530000   2.06397202
  0.90530000   2.06396887
  0.90530000   2.06396594
  0.90530000   2.06396319
  0.90530000   2.06396062
  0.90530000   2.06395821
  0.90530000   2.06395594
  0.90530000   2.06395380
  0.90530000   2.06395177
  0.90530000   2.06394986
  0.90530000   2.06394805
  0.90530000   2.06394633
  0.90530000   2.06394469
  0.90530000   2.06394314
  0.90530000   2.06394166
  0.90540000   2.06500102
  0.90540000   2.06499406
  0.90540000   2.06498780
  0.90540000   2.06498215
  0.90540000   2.06497701
  0.90540000   2.06497232
  0.90540000   2.06496802
  0.90540000   2.06496406
  0.90540000   2.06496041
  0.90540000   2.06495702
  0.90540000   2.06495387
  0.90540000   2.06495093
  0.90540000   2.06494818
  0.90540000   2.06494561
  0.90540000   2.06494319
  0.90540000   2.06494092
  0.90540000   2.06493878
  0.90540000   2.06493676
  0.90540000   2.06493484
  0.90540000   2.06493303
  0.90540000   2.06493131
  0.90540000   2.06492967
  0.90540000   2.06492812
  0.90540000   2.06492663
  0.90550000   2.06598152
  0.90550000   2.06597457
  0.90550000   2.06596832
  0.90550000   2.06596267
  0.90550000   2.06595753
  0.90550000   2.06595284
  0.90550000   2.06594854
  0.90550000   2.06594458
  0.90550000   2.06594093
  0.90550000   2.06593754
  0.90550000   2.06593438
  0.90550000   2.06593145
  0.90550000   2.06592870
  0.90550000   2.06592613
  0.90550000   2.06592371
  0.90550000   2.06592144
  0.90550000   2.06591929
  0.90550000   2.06591727
  0.90550000   2.06591535
  0.90550000   2.06591354
  0.90550000   2.06591182
  0.90550000   2.06591018
  0.90550000   2.06590862
  0.90550000   2.06590714
  0.90560000   2.06695759
  0.90560000   2.06695064
  0.90560000   2.06694439
  0.90560000   2.06693875
  0.90560000   2.06693361
  0.90560000   2.06692892
  0.90560000   2.06692462
  0.90560000   2.06692067
  0.90560000   2.06691701
  0.90560000   2.06691362
  0.90560000   2.06691046
  0.90560000   2.06690752
  0.90560000   2.06690478
  0.90560000   2.06690220
  0.90560000   2.06689978
  0.90560000   2.06689751
  0.90560000   2.06689536
  0.90560000   2.06689334
  0.90560000   2.06689142
  0.90560000   2.06688961
  0.90560000   2.06688788
  0.90560000   2.06688625
  0.90560000   2.06688469
  0.90560000   2.06688320
  0.90570000   2.06792926
  0.90570000   2.06792231
  0.90570000   2.06791607
  0.90570000   2.06791042
  0.90570000   2.06790529
  0.90570000   2.06790060
  0.90570000   2.06789630
  0.90570000   2.06789234
  0.90570000   2.06788868
  0.90570000   2.06788529
  0.90570000   2.06788214
  0.90570000   2.06787920
  0.90570000   2.06787645
  0.90570000   2.06787387
  0.90570000   2.06787145
  0.90570000   2.06786918
  0.90570000   2.06786703
  0.90570000   2.06786501
  0.90570000   2.06786309
  0.90570000   2.06786127
  0.90570000   2.06785955
  0.90570000   2.06785791
  0.90570000   2.06785635
  0.90570000   2.06785486
  0.90580000   2.06889655
  0.90580000   2.06888961
  0.90580000   2.06888337
  0.90580000   2.06887772
  0.90580000   2.06887259
  0.90580000   2.06886791
  0.90580000   2.06886361
  0.90580000   2.06885965
  0.90580000   2.06885599
  0.90580000   2.06885260
  0.90580000   2.06884944
  0.90580000   2.06884650
  0.90580000   2.06884375
  0.90580000   2.06884117
  0.90580000   2.06883875
  0.90580000   2.06883648
  0.90580000   2.06883433
  0.90580000   2.06883230
  0.90580000   2.06883038
  0.90580000   2.06882856
  0.90580000   2.06882684
  0.90580000   2.06882520
  0.90580000   2.06882364
  0.90580000   2.06882215
  0.90590000   2.06985951
  0.90590000   2.06985257
  0.90590000   2.06984633
  0.90590000   2.06984069
  0.90590000   2.06983556
  0.90590000   2.06983088
  0.90590000   2.06982658
  0.90590000   2.06982262
  0.90590000   2.06981896
  0.90590000   2.06981556
  0.90590000   2.06981241
  0.90590000   2.06980947
  0.90590000   2.06980672
  0.90590000   2.06980414
  0.90590000   2.06980172
  0.90590000   2.06979944
  0.90590000   2.06979729
  0.90590000   2.06979526
  0.90590000   2.06979334
  0.90590000   2.06979152
  0.90590000   2.06978979
  0.90590000   2.06978815
  0.90590000   2.06978659
  0.90590000   2.06978510
  0.90600000   2.07081816
  0.90600000   2.07081123
  0.90600000   2.07080499
  0.90600000   2.07079935
  0.90600000   2.07079423
  0.90600000   2.07078954
  0.90600000   2.07078524
  0.90600000   2.07078128
  0.90600000   2.07077762
  0.90600000   2.07077423
  0.90600000   2.07077107
  0.90600000   2.07076813
  0.90600000   2.07076538
  0.90600000   2.07076280
  0.90600000   2.07076037
  0.90600000   2.07075809
  0.90600000   2.07075594
  0.90600000   2.07075391
  0.90600000   2.07075199
  0.90600000   2.07075017
  0.90600000   2.07074844
  0.90600000   2.07074680
  0.90600000   2.07074524
  0.90600000   2.07074375
  0.90610000   2.07177254
  0.90610000   2.07176562
  0.90610000   2.07175938
  0.90610000   2.07175375
  0.90610000   2.07174862
  0.90610000   2.07174393
  0.90610000   2.07173964
  0.90610000   2.07173568
  0.90610000   2.07173202
  0.90610000   2.07172862
  0.90610000   2.07172546
  0.90610000   2.07172252
  0.90610000   2.07171977
  0.90610000   2.07171718
  0.90610000   2.07171476
  0.90610000   2.07171248
  0.90610000   2.07171033
  0.90610000   2.07170830
  0.90610000   2.07170638
  0.90610000   2.07170455
  0.90610000   2.07170282
  0.90610000   2.07170118
  0.90610000   2.07169962
  0.90610000   2.07169812
  0.90620000   2.07272269
  0.90620000   2.07271577
  0.90620000   2.07270954
  0.90620000   2.07270390
  0.90620000   2.07269877
  0.90620000   2.07269409
  0.90620000   2.07268979
  0.90620000   2.07268583
  0.90620000   2.07268217
  0.90620000   2.07267877
  0.90620000   2.07267562
  0.90620000   2.07267267
  0.90620000   2.07266992
  0.90620000   2.07266733
  0.90620000   2.07266491
  0.90620000   2.07266263
  0.90620000   2.07266048
  0.90620000   2.07265844
  0.90620000   2.07265652
  0.90620000   2.07265470
  0.90620000   2.07265296
  0.90620000   2.07265132
  0.90620000   2.07264975
  0.90620000   2.07264826
  0.90630000   2.07366863
  0.90630000   2.07366171
  0.90630000   2.07365548
  0.90630000   2.07364985
  0.90630000   2.07364472
  0.90630000   2.07364004
  0.90630000   2.07363574
  0.90630000   2.07363178
  0.90630000   2.07362812
  0.90630000   2.07362472
  0.90630000   2.07362156
  0.90630000   2.07361862
  0.90630000   2.07361586
  0.90630000   2.07361328
  0.90630000   2.07361085
  0.90630000   2.07360857
  0.90630000   2.07360641
  0.90630000   2.07360438
  0.90630000   2.07360246
  0.90630000   2.07360063
  0.90630000   2.07359890
  0.90630000   2.07359725
  0.90630000   2.07359569
  0.90630000   2.07359419
  0.90640000   2.07461039
  0.90640000   2.07460348
  0.90640000   2.07459725
  0.90640000   2.07459162
  0.90640000   2.07458650
  0.90640000   2.07458181
  0.90640000   2.07457751
  0.90640000   2.07457355
  0.90640000   2.07456989
  0.90640000   2.07456649
  0.90640000   2.07456333
  0.90640000   2.07456039
  0.90640000   2.07455763
  0.90640000   2.07455505
  0.90640000   2.07455262
  0.90640000   2.07455033
  0.90640000   2.07454818
  0.90640000   2.07454614
  0.90640000   2.07454422
  0.90640000   2.07454239
  0.90640000   2.07454066
  0.90640000   2.07453901
  0.90640000   2.07453744
  0.90640000   2.07453595
  0.90650000   2.07554801
  0.90650000   2.07554110
  0.90650000   2.07553488
  0.90650000   2.07552925
  0.90650000   2.07552413
  0.90650000   2.07551944
  0.90650000   2.07551514
  0.90650000   2.07551118
  0.90650000   2.07550752
  0.90650000   2.07550412
  0.90650000   2.07550096
  0.90650000   2.07549801
  0.90650000   2.07549526
  0.90650000   2.07549267
  0.90650000   2.07549024
  0.90650000   2.07548796
  0.90650000   2.07548580
  0.90650000   2.07548376
  0.90650000   2.07548184
  0.90650000   2.07548001
  0.90650000   2.07547828
  0.90650000   2.07547663
  0.90650000   2.07547506
  0.90650000   2.07547356
  0.90660000   2.07648152
  0.90660000   2.07647461
  0.90660000   2.07646840
  0.90660000   2.07646277
  0.90660000   2.07645765
  0.90660000   2.07645296
  0.90660000   2.07644866
  0.90660000   2.07644470
  0.90660000   2.07644104
  0.90660000   2.07643764
  0.90660000   2.07643448
  0.90660000   2.07643153
  0.90660000   2.07642877
  0.90660000   2.07642618
  0.90660000   2.07642375
  0.90660000   2.07642147
  0.90660000   2.07641931
  0.90660000   2.07641727
  0.90660000   2.07641534
  0.90660000   2.07641351
  0.90660000   2.07641178
  0.90660000   2.07641013
  0.90660000   2.07640856
  0.90660000   2.07640706
  0.90670000   2.07741095
  0.90670000   2.07740404
  0.90670000   2.07739783
  0.90670000   2.07739220
  0.90670000   2.07738708
  0.90670000   2.07738240
  0.90670000   2.07737810
  0.90670000   2.07737414
  0.90670000   2.07737047
  0.90670000   2.07736708
  0.90670000   2.07736391
  0.90670000   2.07736096
  0.90670000   2.07735820
  0.90670000   2.07735561
  0.90670000   2.07735318
  0.90670000   2.07735090
  0.90670000   2.07734874
  0.90670000   2.07734670
  0.90670000   2.07734477
  0.90670000   2.07734294
  0.90670000   2.07734120
  0.90670000   2.07733955
  0.90670000   2.07733798
  0.90670000   2.07733648
  0.90680000   2.07833632
  0.90680000   2.07832943
  0.90680000   2.07832321
  0.90680000   2.07831759
  0.90680000   2.07831247
  0.90680000   2.07830779
  0.90680000   2.07830349
  0.90680000   2.07829952
  0.90680000   2.07829586
  0.90680000   2.07829246
  0.90680000   2.07828930
  0.90680000   2.07828634
  0.90680000   2.07828358
  0.90680000   2.07828099
  0.90680000   2.07827856
  0.90680000   2.07827627
  0.90680000   2.07827411
  0.90680000   2.07827207
  0.90680000   2.07827014
  0.90680000   2.07826831
  0.90680000   2.07826657
  0.90680000   2.07826492
  0.90680000   2.07826335
  0.90680000   2.07826185
  0.90690000   2.07925768
  0.90690000   2.07925079
  0.90690000   2.07924458
  0.90690000   2.07923895
  0.90690000   2.07923383
  0.90690000   2.07922915
  0.90690000   2.07922485
  0.90690000   2.07922089
  0.90690000   2.07921722
  0.90690000   2.07921382
  0.90690000   2.07921066
  0.90690000   2.07920771
  0.90690000   2.07920494
  0.90690000   2.07920235
  0.90690000   2.07919992
  0.90690000   2.07919763
  0.90690000   2.07919547
  0.90690000   2.07919343
  0.90690000   2.07919150
  0.90690000   2.07918966
  0.90690000   2.07918792
  0.90690000   2.07918627
  0.90690000   2.07918470
  0.90690000   2.07918320
  0.90700000   2.08017505
  0.90700000   2.08016815
  0.90700000   2.08016195
  0.90700000   2.08015633
  0.90700000   2.08015121
  0.90700000   2.08014653
  0.90700000   2.08014223
  0.90700000   2.08013826
  0.90700000   2.08013460
  0.90700000   2.08013120
  0.90700000   2.08012803
  0.90700000   2.08012508
  0.90700000   2.08012231
  0.90700000   2.08011972
  0.90700000   2.08011729
  0.90700000   2.08011500
  0.90700000   2.08011283
  0.90700000   2.08011079
  0.90700000   2.08010886
  0.90700000   2.08010702
  0.90700000   2.08010528
  0.90700000   2.08010363
  0.90700000   2.08010205
  0.90700000   2.08010055
  0.90710000   2.08108845
  0.90710000   2.08108156
  0.90710000   2.08107536
  0.90710000   2.08106974
  0.90710000   2.08106462
  0.90710000   2.08105994
  0.90710000   2.08105564
  0.90710000   2.08105168
  0.90710000   2.08104801
  0.90710000   2.08104461
  0.90710000   2.08104144
  0.90710000   2.08103848
  0.90710000   2.08103572
  0.90710000   2.08103313
  0.90710000   2.08103069
  0.90710000   2.08102840
  0.90710000   2.08102624
  0.90710000   2.08102419
  0.90710000   2.08102226
  0.90710000   2.08102042
  0.90710000   2.08101868
  0.90710000   2.08101703
  0.90710000   2.08101545
  0.90710000   2.08101395
  0.90720000   2.08199792
  0.90720000   2.08199104
  0.90720000   2.08198484
  0.90720000   2.08197922
  0.90720000   2.08197410
  0.90720000   2.08196942
  0.90720000   2.08196512
  0.90720000   2.08196116
  0.90720000   2.08195749
  0.90720000   2.08195408
  0.90720000   2.08195092
  0.90720000   2.08194796
  0.90720000   2.08194520
  0.90720000   2.08194260
  0.90720000   2.08194017
  0.90720000   2.08193787
  0.90720000   2.08193571
  0.90720000   2.08193366
  0.90720000   2.08193173
  0.90720000   2.08192989
  0.90720000   2.08192815
  0.90720000   2.08192649
  0.90720000   2.08192491
  0.90720000   2.08192341
  0.90730000   2.08290349
  0.90730000   2.08289661
  0.90730000   2.08289041
  0.90730000   2.08288479
  0.90730000   2.08287968
  0.90730000   2.08287500
  0.90730000   2.08287070
  0.90730000   2.08286673
  0.90730000   2.08286306
  0.90730000   2.08285966
  0.90730000   2.08285649
  0.90730000   2.08285353
  0.90730000   2.08285077
  0.90730000   2.08284817
  0.90730000   2.08284574
  0.90730000   2.08284344
  0.90730000   2.08284127
  0.90730000   2.08283923
  0.90730000   2.08283729
  0.90730000   2.08283545
  0.90730000   2.08283371
  0.90730000   2.08283205
  0.90730000   2.08283047
  0.90730000   2.08282897
  0.90740000   2.08380519
  0.90740000   2.08379831
  0.90740000   2.08379211
  0.90740000   2.08378649
  0.90740000   2.08378138
  0.90740000   2.08377670
  0.90740000   2.08377240
  0.90740000   2.08376843
  0.90740000   2.08376476
  0.90740000   2.08376136
  0.90740000   2.08375819
  0.90740000   2.08375523
  0.90740000   2.08375246
  0.90740000   2.08374987
  0.90740000   2.08374743
  0.90740000   2.08374513
  0.90740000   2.08374297
  0.90740000   2.08374092
  0.90740000   2.08373898
  0.90740000   2.08373714
  0.90740000   2.08373540
  0.90740000   2.08373374
  0.90740000   2.08373216
  0.90740000   2.08373065
  0.90750000   2.08470303
  0.90750000   2.08469616
  0.90750000   2.08468996
  0.90750000   2.08468435
  0.90750000   2.08467923
  0.90750000   2.08467455
  0.90750000   2.08467025
  0.90750000   2.08466629
  0.90750000   2.08466262
  0.90750000   2.08465921
  0.90750000   2.08465604
  0.90750000   2.08465308
  0.90750000   2.08465031
  0.90750000   2.08464772
  0.90750000   2.08464528
  0.90750000   2.08464298
  0.90750000   2.08464081
  0.90750000   2.08463876
  0.90750000   2.08463682
  0.90750000   2.08463498
  0.90750000   2.08463324
  0.90750000   2.08463158
  0.90750000   2.08463000
  0.90750000   2.08462849
  0.90760000   2.08559706
  0.90760000   2.08559019
  0.90760000   2.08558400
  0.90760000   2.08557838
  0.90760000   2.08557327
  0.90760000   2.08556859
  0.90760000   2.08556429
  0.90760000   2.08556032
  0.90760000   2.08555665
  0.90760000   2.08555325
  0.90760000   2.08555007
  0.90760000   2.08554711
  0.90760000   2.08554434
  0.90760000   2.08554175
  0.90760000   2.08553931
  0.90760000   2.08553701
  0.90760000   2.08553484
  0.90760000   2.08553279
  0.90760000   2.08553085
  0.90760000   2.08552901
  0.90760000   2.08552726
  0.90760000   2.08552560
  0.90760000   2.08552402
  0.90760000   2.08552251
  0.90770000   2.08648730
  0.90770000   2.08648043
  0.90770000   2.08647424
  0.90770000   2.08646863
  0.90770000   2.08646351
  0.90770000   2.08645883
  0.90770000   2.08645453
  0.90770000   2.08645057
  0.90770000   2.08644690
  0.90770000   2.08644349
  0.90770000   2.08644032
  0.90770000   2.08643736
  0.90770000   2.08643458
  0.90770000   2.08643199
  0.90770000   2.08642954
  0.90770000   2.08642724
  0.90770000   2.08642507
  0.90770000   2.08642302
  0.90770000   2.08642108
  0.90770000   2.08641924
  0.90770000   2.08641749
  0.90770000   2.08641583
  0.90770000   2.08641424
  0.90770000   2.08641273
  0.90780000   2.08737377
  0.90780000   2.08736691
  0.90780000   2.08736072
  0.90780000   2.08735511
  0.90780000   2.08735000
  0.90780000   2.08734532
  0.90780000   2.08734102
  0.90780000   2.08733705
  0.90780000   2.08733338
  0.90780000   2.08732997
  0.90780000   2.08732680
  0.90780000   2.08732383
  0.90780000   2.08732106
  0.90780000   2.08731846
  0.90780000   2.08731602
  0.90780000   2.08731372
  0.90780000   2.08731154
  0.90780000   2.08730949
  0.90780000   2.08730755
  0.90780000   2.08730571
  0.90780000   2.08730396
  0.90780000   2.08730229
  0.90780000   2.08730071
  0.90780000   2.08729920
  0.90790000   2.08825651
  0.90790000   2.08824965
  0.90790000   2.08824346
  0.90790000   2.08823785
  0.90790000   2.08823274
  0.90790000   2.08822806
  0.90790000   2.08822376
  0.90790000   2.08821979
  0.90790000   2.08821612
  0.90790000   2.08821271
  0.90790000   2.08820954
  0.90790000   2.08820657
  0.90790000   2.08820380
  0.90790000   2.08820120
  0.90790000   2.08819876
  0.90790000   2.08819645
  0.90790000   2.08819428
  0.90790000   2.08819223
  0.90790000   2.08819028
  0.90790000   2.08818844
  0.90790000   2.08818669
  0.90790000   2.08818502
  0.90790000   2.08818344
  0.90790000   2.08818193
  0.90800000   2.08913554
  0.90800000   2.08912868
  0.90800000   2.08912250
  0.90800000   2.08911689
  0.90800000   2.08911178
  0.90800000   2.08910710
  0.90800000   2.08910280
  0.90800000   2.08909883
  0.90800000   2.08909516
  0.90800000   2.08909175
  0.90800000   2.08908857
  0.90800000   2.08908561
  0.90800000   2.08908283
  0.90800000   2.08908023
  0.90800000   2.08907778
  0.90800000   2.08907548
  0.90800000   2.08907331
  0.90800000   2.08907125
  0.90800000   2.08906930
  0.90800000   2.08906746
  0.90800000   2.08906571
  0.90800000   2.08906404
  0.90800000   2.08906246
  0.90800000   2.08906094
  0.90810000   2.09001089
  0.90810000   2.09000403
  0.90810000   2.08999785
  0.90810000   2.08999224
  0.90810000   2.08998713
  0.90810000   2.08998245
  0.90810000   2.08997815
  0.90810000   2.08997418
  0.90810000   2.08997051
  0.90810000   2.08996710
  0.90810000   2.08996392
  0.90810000   2.08996095
  0.90810000   2.08995818
  0.90810000   2.08995558
  0.90810000   2.08995313
  0.90810000   2.08995082
  0.90810000   2.08994865
  0.90810000   2.08994659
  0.90810000   2.08994464
  0.90810000   2.08994280
  0.90810000   2.08994105
  0.90810000   2.08993938
  0.90810000   2.08993779
  0.90810000   2.08993628
  0.90820000   2.09088258
  0.90820000   2.09087573
  0.90820000   2.09086954
  0.90820000   2.09086394
  0.90820000   2.09085883
  0.90820000   2.09085415
  0.90820000   2.09084984
  0.90820000   2.09084588
  0.90820000   2.09084220
  0.90820000   2.09083879
  0.90820000   2.09083561
  0.90820000   2.09083265
  0.90820000   2.09082987
  0.90820000   2.09082726
  0.90820000   2.09082482
  0.90820000   2.09082251
  0.90820000   2.09082033
  0.90820000   2.09081828
  0.90820000   2.09081633
  0.90820000   2.09081448
  0.90820000   2.09081273
  0.90820000   2.09081106
  0.90820000   2.09080947
  0.90820000   2.09080795
  0.90830000   2.09175064
  0.90830000   2.09174379
  0.90830000   2.09173761
  0.90830000   2.09173200
  0.90830000   2.09172689
  0.90830000   2.09172221
  0.90830000   2.09171791
  0.90830000   2.09171394
  0.90830000   2.09171026
  0.90830000   2.09170685
  0.90830000   2.09170367
  0.90830000   2.09170071
  0.90830000   2.09169793
  0.90830000   2.09169532
  0.90830000   2.09169287
  0.90830000   2.09169057
  0.90830000   2.09168839
  0.90830000   2.09168633
  0.90830000   2.09168438
  0.90830000   2.09168253
  0.90830000   2.09168078
  0.90830000   2.09167911
  0.90830000   2.09167752
  0.90830000   2.09167600
  0.90840000   2.09261509
  0.90840000   2.09260824
  0.90840000   2.09260207
  0.90840000   2.09259646
  0.90840000   2.09259135
  0.90840000   2.09258667
  0.90840000   2.09258237
  0.90840000   2.09257840
  0.90840000   2.09257472
  0.90840000   2.09257131
  0.90840000   2.09256813
  0.90840000   2.09256516
  0.90840000   2.09256238
  0.90840000   2.09255978
  0.90840000   2.09255733
  0.90840000   2.09255502
  0.90840000   2.09255284
  0.90840000   2.09255078
  0.90840000   2.09254883
  0.90840000   2.09254698
  0.90840000   2.09254522
  0.90840000   2.09254355
  0.90840000   2.09254196
  0.90840000   2.09254044
  0.90850000   2.09347597
  0.90850000   2.09346912
  0.90850000   2.09346295
  0.90850000   2.09345734
  0.90850000   2.09345223
  0.90850000   2.09344755
  0.90850000   2.09344325
  0.90850000   2.09343928
  0.90850000   2.09343560
  0.90850000   2.09343219
  0.90850000   2.09342901
  0.90850000   2.09342604
  0.90850000   2.09342326
  0.90850000   2.09342065
  0.90850000   2.09341820
  0.90850000   2.09341589
  0.90850000   2.09341371
  0.90850000   2.09341165
  0.90850000   2.09340970
  0.90850000   2.09340785
  0.90850000   2.09340609
  0.90850000   2.09340442
  0.90850000   2.09340282
  0.90850000   2.09340131
  0.90860000   2.09433329
  0.90860000   2.09432645
  0.90860000   2.09432027
  0.90860000   2.09431467
  0.90860000   2.09430956
  0.90860000   2.09430488
  0.90860000   2.09430058
  0.90860000   2.09429661
  0.90860000   2.09429293
  0.90860000   2.09428951
  0.90860000   2.09428633
  0.90860000   2.09428336
  0.90860000   2.09428058
  0.90860000   2.09427797
  0.90860000   2.09427552
  0.90860000   2.09427321
  0.90860000   2.09427103
  0.90860000   2.09426896
  0.90860000   2.09426701
  0.90860000   2.09426516
  0.90860000   2.09426340
  0.90860000   2.09426173
  0.90860000   2.09426013
  0.90860000   2.09425861
  0.90870000   2.09518708
  0.90870000   2.09518024
  0.90870000   2.09517407
  0.90870000   2.09516847
  0.90870000   2.09516336
  0.90870000   2.09515868
  0.90870000   2.09515437
  0.90870000   2.09515040
  0.90870000   2.09514672
  0.90870000   2.09514331
  0.90870000   2.09514013
  0.90870000   2.09513715
  0.90870000   2.09513437
  0.90870000   2.09513176
  0.90870000   2.09512931
  0.90870000   2.09512699
  0.90870000   2.09512481
  0.90870000   2.09512275
  0.90870000   2.09512080
  0.90870000   2.09511894
  0.90870000   2.09511718
  0.90870000   2.09511551
  0.90870000   2.09511391
  0.90870000   2.09511239
  0.90880000   2.09603737
  0.90880000   2.09603053
  0.90880000   2.09602436
  0.90880000   2.09601876
  0.90880000   2.09601365
  0.90880000   2.09600897
  0.90880000   2.09600467
  0.90880000   2.09600069
  0.90880000   2.09599702
  0.90880000   2.09599360
  0.90880000   2.09599042
  0.90880000   2.09598744
  0.90880000   2.09598466
  0.90880000   2.09598205
  0.90880000   2.09597959
  0.90880000   2.09597728
  0.90880000   2.09597510
  0.90880000   2.09597303
  0.90880000   2.09597108
  0.90880000   2.09596922
  0.90880000   2.09596746
  0.90880000   2.09596579
  0.90880000   2.09596419
  0.90880000   2.09596267
  0.90890000   2.09688417
  0.90890000   2.09687734
  0.90890000   2.09687117
  0.90890000   2.09686557
  0.90890000   2.09686046
  0.90890000   2.09685578
  0.90890000   2.09685148
  0.90890000   2.09684751
  0.90890000   2.09684383
  0.90890000   2.09684041
  0.90890000   2.09683722
  0.90890000   2.09683425
  0.90890000   2.09683147
  0.90890000   2.09682885
  0.90890000   2.09682640
  0.90890000   2.09682408
  0.90890000   2.09682190
  0.90890000   2.09681983
  0.90890000   2.09681788
  0.90890000   2.09681602
  0.90890000   2.09681426
  0.90890000   2.09681258
  0.90890000   2.09681099
  0.90890000   2.09680946
  0.90900000   2.09772753
  0.90900000   2.09772070
  0.90900000   2.09771453
  0.90900000   2.09770893
  0.90900000   2.09770382
  0.90900000   2.09769914
  0.90900000   2.09769484
  0.90900000   2.09769086
  0.90900000   2.09768718
  0.90900000   2.09768376
  0.90900000   2.09768058
  0.90900000   2.09767760
  0.90900000   2.09767482
  0.90900000   2.09767220
  0.90900000   2.09766975
  0.90900000   2.09766743
  0.90900000   2.09766525
  0.90900000   2.09766318
  0.90900000   2.09766122
  0.90900000   2.09765937
  0.90900000   2.09765760
  0.90900000   2.09765592
  0.90900000   2.09765433
  0.90900000   2.09765280
  0.90910000   2.09856745
  0.90910000   2.09856062
  0.90910000   2.09855445
  0.90910000   2.09854885
  0.90910000   2.09854375
  0.90910000   2.09853907
  0.90910000   2.09853476
  0.90910000   2.09853079
  0.90910000   2.09852711
  0.90910000   2.09852369
  0.90910000   2.09852050
  0.90910000   2.09851753
  0.90910000   2.09851474
  0.90910000   2.09851212
  0.90910000   2.09850967
  0.90910000   2.09850735
  0.90910000   2.09850516
  0.90910000   2.09850309
  0.90910000   2.09850114
  0.90910000   2.09849928
  0.90910000   2.09849751
  0.90910000   2.09849583
  0.90910000   2.09849424
  0.90910000   2.09849271
  0.90920000   2.09940396
  0.90920000   2.09939714
  0.90920000   2.09939097
  0.90920000   2.09938537
  0.90920000   2.09938027
  0.90920000   2.09937559
  0.90920000   2.09937128
  0.90920000   2.09936731
  0.90920000   2.09936362
  0.90920000   2.09936020
  0.90920000   2.09935702
  0.90920000   2.09935404
  0.90920000   2.09935125
  0.90920000   2.09934864
  0.90920000   2.09934618
  0.90920000   2.09934386
  0.90920000   2.09934167
  0.90920000   2.09933960
  0.90920000   2.09933764
  0.90920000   2.09933578
  0.90920000   2.09933402
  0.90920000   2.09933234
  0.90920000   2.09933074
  0.90920000   2.09932921
  0.90930000   2.10023709
  0.90930000   2.10023027
  0.90930000   2.10022410
  0.90930000   2.10021851
  0.90930000   2.10021340
  0.90930000   2.10020872
  0.90930000   2.10020441
  0.90930000   2.10020044
  0.90930000   2.10019676
  0.90930000   2.10019333
  0.90930000   2.10019015
  0.90930000   2.10018717
  0.90930000   2.10018438
  0.90930000   2.10018176
  0.90930000   2.10017930
  0.90930000   2.10017698
  0.90930000   2.10017479
  0.90930000   2.10017272
  0.90930000   2.10017076
  0.90930000   2.10016890
  0.90930000   2.10016714
  0.90930000   2.10016546
  0.90930000   2.10016385
  0.90930000   2.10016233
  0.90940000   2.10106686
  0.90940000   2.10106004
  0.90940000   2.10105388
  0.90940000   2.10104828
  0.90940000   2.10104317
  0.90940000   2.10103849
  0.90940000   2.10103419
  0.90940000   2.10103021
  0.90940000   2.10102653
  0.90940000   2.10102311
  0.90940000   2.10101992
  0.90940000   2.10101694
  0.90940000   2.10101415
  0.90940000   2.10101153
  0.90940000   2.10100907
  0.90940000   2.10100675
  0.90940000   2.10100456
  0.90940000   2.10100248
  0.90940000   2.10100052
  0.90940000   2.10099866
  0.90940000   2.10099689
  0.90940000   2.10099521
  0.90940000   2.10099361
  0.90940000   2.10099208
  0.90950000   2.10189329
  0.90950000   2.10188647
  0.90950000   2.10188031
  0.90950000   2.10187471
  0.90950000   2.10186961
  0.90950000   2.10186493
  0.90950000   2.10186062
  0.90950000   2.10185665
  0.90950000   2.10185296
  0.90950000   2.10184954
  0.90950000   2.10184635
  0.90950000   2.10184337
  0.90950000   2.10184058
  0.90950000   2.10183796
  0.90950000   2.10183549
  0.90950000   2.10183317
  0.90950000   2.10183098
  0.90950000   2.10182891
  0.90950000   2.10182695
  0.90950000   2.10182508
  0.90950000   2.10182331
  0.90950000   2.10182163
  0.90950000   2.10182003
  0.90950000   2.10181850
  0.90960000   2.10271641
  0.90960000   2.10270959
  0.90960000   2.10270343
  0.90960000   2.10269784
  0.90960000   2.10269273
  0.90960000   2.10268805
  0.90960000   2.10268374
  0.90960000   2.10267976
  0.90960000   2.10267608
  0.90960000   2.10267266
  0.90960000   2.10266946
  0.90960000   2.10266648
  0.90960000   2.10266369
  0.90960000   2.10266107
  0.90960000   2.10265861
  0.90960000   2.10265628
  0.90960000   2.10265409
  0.90960000   2.10265202
  0.90960000   2.10265005
  0.90960000   2.10264819
  0.90960000   2.10264642
  0.90960000   2.10264474
  0.90960000   2.10264313
  0.90960000   2.10264160
  0.90970000   2.10353623
  0.90970000   2.10352942
  0.90970000   2.10352326
  0.90970000   2.10351766
  0.90970000   2.10351256
  0.90970000   2.10350788
  0.90970000   2.10350357
  0.90970000   2.10349959
  0.90970000   2.10349591
  0.90970000   2.10349248
  0.90970000   2.10348929
  0.90970000   2.10348631
  0.90970000   2.10348351
  0.90970000   2.10348089
  0.90970000   2.10347843
  0.90970000   2.10347610
  0.90970000   2.10347391
  0.90970000   2.10347183
  0.90970000   2.10346987
  0.90970000   2.10346800
  0.90970000   2.10346623
  0.90970000   2.10346455
  0.90970000   2.10346294
  0.90970000   2.10346141
  0.90980000   2.10435278
  0.90980000   2.10434597
  0.90980000   2.10433982
  0.90980000   2.10433422
  0.90980000   2.10432912
  0.90980000   2.10432444
  0.90980000   2.10432013
  0.90980000   2.10431615
  0.90980000   2.10431246
  0.90980000   2.10430904
  0.90980000   2.10430584
  0.90980000   2.10430286
  0.90980000   2.10430007
  0.90980000   2.10429744
  0.90980000   2.10429498
  0.90980000   2.10429265
  0.90980000   2.10429046
  0.90980000   2.10428838
  0.90980000   2.10428641
  0.90980000   2.10428455
  0.90980000   2.10428278
  0.90980000   2.10428109
  0.90980000   2.10427949
  0.90980000   2.10427795
  0.90990000   2.10516609
  0.90990000   2.10515928
  0.90990000   2.10515313
  0.90990000   2.10514753
  0.90990000   2.10514243
  0.90990000   2.10513775
  0.90990000   2.10513344
  0.90990000   2.10512946
  0.90990000   2.10512577
  0.90990000   2.10512234
  0.90990000   2.10511915
  0.90990000   2.10511617
  0.90990000   2.10511337
  0.90990000   2.10511075
  0.90990000   2.10510828
  0.90990000   2.10510595
  0.90990000   2.10510376
  0.90990000   2.10510168
  0.90990000   2.10509971
  0.90990000   2.10509785
  0.90990000   2.10509607
  0.90990000   2.10509439
  0.90990000   2.10509278
  0.90990000   2.10509125
  0.91000000   2.10597617
  0.91000000   2.10596936
  0.91000000   2.10596321
  0.91000000   2.10595762
  0.91000000   2.10595251
  0.91000000   2.10594783
  0.91000000   2.10594352
  0.91000000   2.10593954
  0.91000000   2.10593585
  0.91000000   2.10593243
  0.91000000   2.10592923
  0.91000000   2.10592625
  0.91000000   2.10592345
  0.91000000   2.10592083
  0.91000000   2.10591836
  0.91000000   2.10591603
  0.91000000   2.10591383
  0.91000000   2.10591175
  0.91000000   2.10590979
  0.91000000   2.10590792
  0.91000000   2.10590614
  0.91000000   2.10590446
  0.91000000   2.10590285
  0.91000000   2.10590131
  0.91010000   2.10678305
  0.91010000   2.10677624
  0.91010000   2.10677009
  0.91010000   2.10676450
  0.91010000   2.10675939
  0.91010000   2.10675471
  0.91010000   2.10675040
  0.91010000   2.10674642
  0.91010000   2.10674273
  0.91010000   2.10673931
  0.91010000   2.10673611
  0.91010000   2.10673312
  0.91010000   2.10673033
  0.91010000   2.10672770
  0.91010000   2.10672523
  0.91010000   2.10672290
  0.91010000   2.10672070
  0.91010000   2.10671862
  0.91010000   2.10671665
  0.91010000   2.10671479
  0.91010000   2.10671301
  0.91010000   2.10671132
  0.91010000   2.10670971
  0.91010000   2.10670818
  0.91020000   2.10758674
  0.91020000   2.10757994
  0.91020000   2.10757379
  0.91020000   2.10756820
  0.91020000   2.10756309
  0.91020000   2.10755841
  0.91020000   2.10755410
  0.91020000   2.10755012
  0.91020000   2.10754643
  0.91020000   2.10754300
  0.91020000   2.10753980
  0.91020000   2.10753682
  0.91020000   2.10753402
  0.91020000   2.10753139
  0.91020000   2.10752892
  0.91020000   2.10752659
  0.91020000   2.10752439
  0.91020000   2.10752231
  0.91020000   2.10752034
  0.91020000   2.10751847
  0.91020000   2.10751669
  0.91020000   2.10751500
  0.91020000   2.10751339
  0.91020000   2.10751186
  0.91030000   2.10838728
  0.91030000   2.10838048
  0.91030000   2.10837433
  0.91030000   2.10836874
  0.91030000   2.10836363
  0.91030000   2.10835895
  0.91030000   2.10835464
  0.91030000   2.10835066
  0.91030000   2.10834697
  0.91030000   2.10834354
  0.91030000   2.10834034
  0.91030000   2.10833735
  0.91030000   2.10833455
  0.91030000   2.10833192
  0.91030000   2.10832945
  0.91030000   2.10832712
  0.91030000   2.10832492
  0.91030000   2.10832284
  0.91030000   2.10832087
  0.91030000   2.10831900
  0.91030000   2.10831722
  0.91030000   2.10831553
  0.91030000   2.10831392
  0.91030000   2.10831238
  0.91040000   2.10918467
  0.91040000   2.10917787
  0.91040000   2.10917172
  0.91040000   2.10916613
  0.91040000   2.10916103
  0.91040000   2.10915635
  0.91040000   2.10915204
  0.91040000   2.10914806
  0.91040000   2.10914436
  0.91040000   2.10914093
  0.91040000   2.10913773
  0.91040000   2.10913474
  0.91040000   2.10913194
  0.91040000   2.10912931
  0.91040000   2.10912684
  0.91040000   2.10912451
  0.91040000   2.10912231
  0.91040000   2.10912023
  0.91040000   2.10911825
  0.91040000   2.10911638
  0.91040000   2.10911460
  0.91040000   2.10911291
  0.91040000   2.10911130
  0.91040000   2.10910976
  0.91050000   2.10997895
  0.91050000   2.10997215
  0.91050000   2.10996600
  0.91050000   2.10996041
  0.91050000   2.10995531
  0.91050000   2.10995063
  0.91050000   2.10994632
  0.91050000   2.10994233
  0.91050000   2.10993864
  0.91050000   2.10993521
  0.91050000   2.10993201
  0.91050000   2.10992902
  0.91050000   2.10992622
  0.91050000   2.10992359
  0.91050000   2.10992111
  0.91050000   2.10991878
  0.91050000   2.10991658
  0.91050000   2.10991449
  0.91050000   2.10991252
  0.91050000   2.10991065
  0.91050000   2.10990887
  0.91050000   2.10990717
  0.91050000   2.10990556
  0.91050000   2.10990402
  0.91060000   2.11077013
  0.91060000   2.11076333
  0.91060000   2.11075719
  0.91060000   2.11075160
  0.91060000   2.11074649
  0.91060000   2.11074181
  0.91060000   2.11073750
  0.91060000   2.11073352
  0.91060000   2.11072982
  0.91060000   2.11072639
  0.91060000   2.11072319
  0.91060000   2.11072020
  0.91060000   2.11071739
  0.91060000   2.11071476
  0.91060000   2.11071229
  0.91060000   2.11070995
  0.91060000   2.11070775
  0.91060000   2.11070566
  0.91060000   2.11070369
  0.91060000   2.11070182
  0.91060000   2.11070003
  0.91060000   2.11069834
  0.91060000   2.11069673
  0.91060000   2.11069519
  0.91070000   2.11155823
  0.91070000   2.11155144
  0.91070000   2.11154529
  0.91070000   2.11153970
  0.91070000   2.11153460
  0.91070000   2.11152991
  0.91070000   2.11152560
  0.91070000   2.11152162
  0.91070000   2.11151792
  0.91070000   2.11151449
  0.91070000   2.11151129
  0.91070000   2.11150830
  0.91070000   2.11150549
  0.91070000   2.11150286
  0.91070000   2.11150038
  0.91070000   2.11149805
  0.91070000   2.11149584
  0.91070000   2.11149376
  0.91070000   2.11149178
  0.91070000   2.11148991
  0.91070000   2.11148812
  0.91070000   2.11148643
  0.91070000   2.11148481
  0.91070000   2.11148327
  0.91080000   2.11234327
  0.91080000   2.11233648
  0.91080000   2.11233034
  0.91080000   2.11232475
  0.91080000   2.11231964
  0.91080000   2.11231496
  0.91080000   2.11231065
  0.91080000   2.11230666
  0.91080000   2.11230297
  0.91080000   2.11229954
  0.91080000   2.11229633
  0.91080000   2.11229334
  0.91080000   2.11229053
  0.91080000   2.11228790
  0.91080000   2.11228542
  0.91080000   2.11228309
  0.91080000   2.11228088
  0.91080000   2.11227879
  0.91080000   2.11227682
  0.91080000   2.11227494
  0.91080000   2.11227316
  0.91080000   2.11227146
  0.91080000   2.11226985
  0.91080000   2.11226830
  0.91090000   2.11312528
  0.91090000   2.11311849
  0.91090000   2.11311235
  0.91090000   2.11310676
  0.91090000   2.11310166
  0.91090000   2.11309697
  0.91090000   2.11309266
  0.91090000   2.11308867
  0.91090000   2.11308498
  0.91090000   2.11308154
  0.91090000   2.11307834
  0.91090000   2.11307534
  0.91090000   2.11307254
  0.91090000   2.11306990
  0.91090000   2.11306743
  0.91090000   2.11306509
  0.91090000   2.11306288
  0.91090000   2.11306079
  0.91090000   2.11305882
  0.91090000   2.11305694
  0.91090000   2.11305515
  0.91090000   2.11305346
  0.91090000   2.11305184
  0.91090000   2.11305030
  0.91100000   2.11390427
  0.91100000   2.11389748
  0.91100000   2.11389134
  0.91100000   2.11388575
  0.91100000   2.11388065
  0.91100000   2.11387597
  0.91100000   2.11387165
  0.91100000   2.11386767
  0.91100000   2.11386397
  0.91100000   2.11386053
  0.91100000   2.11385733
  0.91100000   2.11385433
  0.91100000   2.11385153
  0.91100000   2.11384889
  0.91100000   2.11384641
  0.91100000   2.11384407
  0.91100000   2.11384187
  0.91100000   2.11383978
  0.91100000   2.11383780
  0.91100000   2.11383592
  0.91100000   2.11383413
  0.91100000   2.11383244
  0.91100000   2.11383082
  0.91100000   2.11382927
  0.91110000   2.11468027
  0.91110000   2.11467348
  0.91110000   2.11466734
  0.91110000   2.11466175
  0.91110000   2.11465665
  0.91110000   2.11465196
  0.91110000   2.11464765
  0.91110000   2.11464366
  0.91110000   2.11463997
  0.91110000   2.11463653
  0.91110000   2.11463332
  0.91110000   2.11463033
  0.91110000   2.11462752
  0.91110000   2.11462488
  0.91110000   2.11462240
  0.91110000   2.11462006
  0.91110000   2.11461785
  0.91110000   2.11461576
  0.91110000   2.11461378
  0.91110000   2.11461190
  0.91110000   2.11461012
  0.91110000   2.11460842
  0.91110000   2.11460680
  0.91110000   2.11460525
  0.91120000   2.11545328
  0.91120000   2.11544650
  0.91120000   2.11544036
  0.91120000   2.11543477
  0.91120000   2.11542967
  0.91120000   2.11542498
  0.91120000   2.11542067
  0.91120000   2.11541668
  0.91120000   2.11541298
  0.91120000   2.11540955
  0.91120000   2.11540634
  0.91120000   2.11540334
  0.91120000   2.11540053
  0.91120000   2.11539789
  0.91120000   2.11539541
  0.91120000   2.11539307
  0.91120000   2.11539086
  0.91120000   2.11538877
  0.91120000   2.11538679
  0.91120000   2.11538491
  0.91120000   2.11538312
  0.91120000   2.11538142
  0.91120000   2.11537980
  0.91120000   2.11537826
  0.91130000   2.11622334
  0.91130000   2.11621656
  0.91130000   2.11621042
  0.91130000   2.11620483
  0.91130000   2.11619973
  0.91130000   2.11619505
  0.91130000   2.11619073
  0.91130000   2.11618674
  0.91130000   2.11618304
  0.91130000   2.11617961
  0.91130000   2.11617640
  0.91130000   2.11617340
  0.91130000   2.11617059
  0.91130000   2.11616795
  0.91130000   2.11616547
  0.91130000   2.11616313
  0.91130000   2.11616091
  0.91130000   2.11615882
  0.91130000   2.11615684
  0.91130000   2.11615496
  0.91130000   2.11615317
  0.91130000   2.11615147
  0.91130000   2.11614985
  0.91130000   2.11614830
  0.91140000   2.11699046
  0.91140000   2.11698368
  0.91140000   2.11697754
  0.91140000   2.11697196
  0.91140000   2.11696685
  0.91140000   2.11696217
  0.91140000   2.11695785
  0.91140000   2.11695387
  0.91140000   2.11695017
  0.91140000   2.11694673
  0.91140000   2.11694352
  0.91140000   2.11694052
  0.91140000   2.11693771
  0.91140000   2.11693507
  0.91140000   2.11693258
  0.91140000   2.11693024
  0.91140000   2.11692803
  0.91140000   2.11692593
  0.91140000   2.11692395
  0.91140000   2.11692207
  0.91140000   2.11692028
  0.91140000   2.11691858
  0.91140000   2.11691696
  0.91140000   2.11691541
  0.91150000   2.11775467
  0.91150000   2.11774789
  0.91150000   2.11774175
  0.91150000   2.11773616
  0.91150000   2.11773106
  0.91150000   2.11772637
  0.91150000   2.11772206
  0.91150000   2.11771807
  0.91150000   2.11771437
  0.91150000   2.11771093
  0.91150000   2.11770772
  0.91150000   2.11770472
  0.91150000   2.11770190
  0.91150000   2.11769926
  0.91150000   2.11769678
  0.91150000   2.11769444
  0.91150000   2.11769222
  0.91150000   2.11769013
  0.91150000   2.11768814
  0.91150000   2.11768626
  0.91150000   2.11768447
  0.91150000   2.11768277
  0.91150000   2.11768114
  0.91150000   2.11767960
  0.91160000   2.11851597
  0.91160000   2.11850919
  0.91160000   2.11850305
  0.91160000   2.11849747
  0.91160000   2.11849236
  0.91160000   2.11848768
  0.91160000   2.11848336
  0.91160000   2.11847937
  0.91160000   2.11847567
  0.91160000   2.11847223
  0.91160000   2.11846902
  0.91160000   2.11846602
  0.91160000   2.11846320
  0.91160000   2.11846056
  0.91160000   2.11845807
  0.91160000   2.11845573
  0.91160000   2.11845352
  0.91160000   2.11845142
  0.91160000   2.11844943
  0.91160000   2.11844755
  0.91160000   2.11844576
  0.91160000   2.11844406
  0.91160000   2.11844243
  0.91160000   2.11844088
  0.91170000   2.11927439
  0.91170000   2.11926761
  0.91170000   2.11926147
  0.91170000   2.11925589
  0.91170000   2.11925078
  0.91170000   2.11924610
  0.91170000   2.11924178
  0.91170000   2.11923779
  0.91170000   2.11923409
  0.91170000   2.11923065
  0.91170000   2.11922744
  0.91170000   2.11922443
  0.91170000   2.11922162
  0.91170000   2.11921898
  0.91170000   2.11921649
  0.91170000   2.11921414
  0.91170000   2.11921193
  0.91170000   2.11920983
  0.91170000   2.11920784
  0.91170000   2.11920596
  0.91170000   2.11920417
  0.91170000   2.11920246
  0.91170000   2.11920084
  0.91170000   2.11919929
  0.91180000   2.12002994
  0.91180000   2.12002317
  0.91180000   2.12001703
  0.91180000   2.12001145
  0.91180000   2.12000634
  0.91180000   2.12000166
  0.91180000   2.11999734
  0.91180000   2.11999335
  0.91180000   2.11998965
  0.91180000   2.11998620
  0.91180000   2.11998299
  0.91180000   2.11997999
  0.91180000   2.11997717
  0.91180000   2.11997453
  0.91180000   2.11997204
  0.91180000   2.11996969
  0.91180000   2.11996748
  0.91180000   2.11996538
  0.91180000   2.11996339
  0.91180000   2.11996151
  0.91180000   2.11995971
  0.91180000   2.11995801
  0.91180000   2.11995638
  0.91180000   2.11995483
  0.91190000   2.12078265
  0.91190000   2.12077588
  0.91190000   2.12076974
  0.91190000   2.12076416
  0.91190000   2.12075906
  0.91190000   2.12075437
  0.91190000   2.12075005
  0.91190000   2.12074606
  0.91190000   2.12074236
  0.91190000   2.12073891
  0.91190000   2.12073570
  0.91190000   2.12073270
  0.91190000   2.12072988
  0.91190000   2.12072723
  0.91190000   2.12072474
  0.91190000   2.12072240
  0.91190000   2.12072018
  0.91190000   2.12071808
  0.91190000   2.12071609
  0.91190000   2.12071421
  0.91190000   2.12071241
  0.91190000   2.12071071
  0.91190000   2.12070908
  0.91190000   2.12070753
  0.91200000   2.12153254
  0.91200000   2.12152577
  0.91200000   2.12151963
  0.91200000   2.12151405
  0.91200000   2.12150895
  0.91200000   2.12150426
  0.91200000   2.12149994
  0.91200000   2.12149595
  0.91200000   2.12149224
  0.91200000   2.12148880
  0.91200000   2.12148558
  0.91200000   2.12148258
  0.91200000   2.12147976
  0.91200000   2.12147711
  0.91200000   2.12147462
  0.91200000   2.12147228
  0.91200000   2.12147006
  0.91200000   2.12146796
  0.91200000   2.12146597
  0.91200000   2.12146408
  0.91200000   2.12146229
  0.91200000   2.12146058
  0.91200000   2.12145895
  0.91200000   2.12145740
  0.91210000   2.12227962
  0.91210000   2.12227284
  0.91210000   2.12226671
  0.91210000   2.12226113
  0.91210000   2.12225602
  0.91210000   2.12225134
  0.91210000   2.12224702
  0.91210000   2.12224303
  0.91210000   2.12223932
  0.91210000   2.12223587
  0.91210000   2.12223266
  0.91210000   2.12222965
  0.91210000   2.12222683
  0.91210000   2.12222419
  0.91210000   2.12222170
  0.91210000   2.12221935
  0.91210000   2.12221713
  0.91210000   2.12221503
  0.91210000   2.12221304
  0.91210000   2.12221115
  0.91210000   2.12220935
  0.91210000   2.12220764
  0.91210000   2.12220601
  0.91210000   2.12220446
  0.91220000   2.12302390
  0.91220000   2.12301713
  0.91220000   2.12301100
  0.91220000   2.12300542
  0.91220000   2.12300031
  0.91220000   2.12299563
  0.91220000   2.12299131
  0.91220000   2.12298731
  0.91220000   2.12298361
  0.91220000   2.12298016
  0.91220000   2.12297694
  0.91220000   2.12297394
  0.91220000   2.12297112
  0.91220000   2.12296847
  0.91220000   2.12296598
  0.91220000   2.12296363
  0.91220000   2.12296141
  0.91220000   2.12295930
  0.91220000   2.12295731
  0.91220000   2.12295542
  0.91220000   2.12295363
  0.91220000   2.12295192
  0.91220000   2.12295029
  0.91220000   2.12294873
  0.91230000   2.12376542
  0.91230000   2.12375865
  0.91230000   2.12375252
  0.91230000   2.12374693
  0.91230000   2.12374183
  0.91230000   2.12373714
  0.91230000   2.12373282
  0.91230000   2.12372883
  0.91230000   2.12372512
  0.91230000   2.12372167
  0.91230000   2.12371846
  0.91230000   2.12371545
  0.91230000   2.12371263
  0.91230000   2.12370998
  0.91230000   2.12370748
  0.91230000   2.12370513
  0.91230000   2.12370291
  0.91230000   2.12370081
  0.91230000   2.12369882
  0.91230000   2.12369693
  0.91230000   2.12369513
  0.91230000   2.12369342
  0.91230000   2.12369179
  0.91230000   2.12369023
  0.91240000   2.12450417
  0.91240000   2.12449741
  0.91240000   2.12449128
  0.91240000   2.12448569
  0.91240000   2.12448059
  0.91240000   2.12447590
  0.91240000   2.12447158
  0.91240000   2.12446759
  0.91240000   2.12446388
  0.91240000   2.12446043
  0.91240000   2.12445721
  0.91240000   2.12445420
  0.91240000   2.12445138
  0.91240000   2.12444873
  0.91240000   2.12444624
  0.91240000   2.12444388
  0.91240000   2.12444166
  0.91240000   2.12443956
  0.91240000   2.12443757
  0.91240000   2.12443567
  0.91240000   2.12443388
  0.91240000   2.12443216
  0.91240000   2.12443053
  0.91240000   2.12442898
  0.91250000   2.12524019
  0.91250000   2.12523343
  0.91250000   2.12522730
  0.91250000   2.12522172
  0.91250000   2.12521661
  0.91250000   2.12521193
  0.91250000   2.12520760
  0.91250000   2.12520361
  0.91250000   2.12519990
  0.91250000   2.12519645
  0.91250000   2.12519323
  0.91250000   2.12519022
  0.91250000   2.12518740
  0.91250000   2.12518475
  0.91250000   2.12518225
  0.91250000   2.12517990
  0.91250000   2.12517768
  0.91250000   2.12517557
  0.91250000   2.12517358
  0.91250000   2.12517168
  0.91250000   2.12516988
  0.91250000   2.12516817
  0.91250000   2.12516654
  0.91250000   2.12516498
  0.91260000   2.12597349
  0.91260000   2.12596673
  0.91260000   2.12596060
  0.91260000   2.12595502
  0.91260000   2.12594992
  0.91260000   2.12594523
  0.91260000   2.12594091
  0.91260000   2.12593691
  0.91260000   2.12593320
  0.91260000   2.12592975
  0.91260000   2.12592653
  0.91260000   2.12592352
  0.91260000   2.12592070
  0.91260000   2.12591804
  0.91260000   2.12591555
  0.91260000   2.12591319
  0.91260000   2.12591097
  0.91260000   2.12590886
  0.91260000   2.12590687
  0.91260000   2.12590497
  0.91260000   2.12590317
  0.91260000   2.12590146
  0.91260000   2.12589983
  0.91260000   2.12589827
  0.91270000   2.12670409
  0.91270000   2.12669733
  0.91270000   2.12669120
  0.91270000   2.12668562
  0.91270000   2.12668052
  0.91270000   2.12667583
  0.91270000   2.12667151
  0.91270000   2.12666751
  0.91270000   2.12666380
  0.91270000   2.12666035
  0.91270000   2.12665713
  0.91270000   2.12665411
  0.91270000   2.12665129
  0.91270000   2.12664864
  0.91270000   2.12664614
  0.91270000   2.12664378
  0.91270000   2.12664156
  0.91270000   2.12663945
  0.91270000   2.12663746
  0.91270000   2.12663556
  0.91270000   2.12663376
  0.91270000   2.12663204
  0.91270000   2.12663041
  0.91270000   2.12662885
  0.91280000   2.12743200
  0.91280000   2.12742524
  0.91280000   2.12741911
  0.91280000   2.12741353
  0.91280000   2.12740843
  0.91280000   2.12740374
  0.91280000   2.12739942
  0.91280000   2.12739542
  0.91280000   2.12739171
  0.91280000   2.12738826
  0.91280000   2.12738503
  0.91280000   2.12738202
  0.91280000   2.12737920
  0.91280000   2.12737654
  0.91280000   2.12737404
  0.91280000   2.12737169
  0.91280000   2.12736946
  0.91280000   2.12736735
  0.91280000   2.12736536
  0.91280000   2.12736346
  0.91280000   2.12736166
  0.91280000   2.12735994
  0.91280000   2.12735831
  0.91280000   2.12735675
  0.91290000   2.12815724
  0.91290000   2.12815048
  0.91290000   2.12814436
  0.91290000   2.12813878
  0.91290000   2.12813367
  0.91290000   2.12812898
  0.91290000   2.12812466
  0.91290000   2.12812066
  0.91290000   2.12811695
  0.91290000   2.12811350
  0.91290000   2.12811027
  0.91290000   2.12810726
  0.91290000   2.12810443
  0.91290000   2.12810178
  0.91290000   2.12809928
  0.91290000   2.12809692
  0.91290000   2.12809469
  0.91290000   2.12809259
  0.91290000   2.12809059
  0.91290000   2.12808869
  0.91290000   2.12808689
  0.91290000   2.12808517
  0.91290000   2.12808354
  0.91290000   2.12808198
  0.91300000   2.12887983
  0.91300000   2.12887307
  0.91300000   2.12886695
  0.91300000   2.12886137
  0.91300000   2.12885626
  0.91300000   2.12885157
  0.91300000   2.12884725
  0.91300000   2.12884325
  0.91300000   2.12883954
  0.91300000   2.12883608
  0.91300000   2.12883286
  0.91300000   2.12882985
  0.91300000   2.12882702
  0.91300000   2.12882436
  0.91300000   2.12882186
  0.91300000   2.12881950
  0.91300000   2.12881728
  0.91300000   2.12881517
  0.91300000   2.12881317
  0.91300000   2.12881127
  0.91300000   2.12880947
  0.91300000   2.12880775
  0.91300000   2.12880611
  0.91300000   2.12880455
  0.91310000   2.12959978
  0.91310000   2.12959303
  0.91310000   2.12958690
  0.91310000   2.12958132
  0.91310000   2.12957622
  0.91310000   2.12957153
  0.91310000   2.12956720
  0.91310000   2.12956320
  0.91310000   2.12955949
  0.91310000   2.12955604
  0.91310000   2.12955281
  0.91310000   2.12954980
  0.91310000   2.12954697
  0.91310000   2.12954431
  0.91310000   2.12954181
  0.91310000   2.12953945
  0.91310000   2.12953722
  0.91310000   2.12953511
  0.91310000   2.12953311
  0.91310000   2.12953121
  0.91310000   2.12952941
  0.91310000   2.12952769
  0.91310000   2.12952605
  0.91310000   2.12952449
  0.91320000   2.13031712
  0.91320000   2.13031036
  0.91320000   2.13030424
  0.91320000   2.13029866
  0.91320000   2.13029355
  0.91320000   2.13028886
  0.91320000   2.13028454
  0.91320000   2.13028054
  0.91320000   2.13027682
  0.91320000   2.13027337
  0.91320000   2.13027014
  0.91320000   2.13026713
  0.91320000   2.13026430
  0.91320000   2.13026164
  0.91320000   2.13025914
  0.91320000   2.13025678
  0.91320000   2.13025455
  0.91320000   2.13025243
  0.91320000   2.13025043
  0.91320000   2.13024853
  0.91320000   2.13024673
  0.91320000   2.13024501
  0.91320000   2.13024337
  0.91320000   2.13024181
  0.91330000   2.13103185
  0.91330000   2.13102509
  0.91330000   2.13101897
  0.91330000   2.13101339
  0.91330000   2.13100828
  0.91330000   2.13100359
  0.91330000   2.13099927
  0.91330000   2.13099527
  0.91330000   2.13099155
  0.91330000   2.13098810
  0.91330000   2.13098487
  0.91330000   2.13098185
  0.91330000   2.13097902
  0.91330000   2.13097636
  0.91330000   2.13097386
  0.91330000   2.13097150
  0.91330000   2.13096927
  0.91330000   2.13096716
  0.91330000   2.13096515
  0.91330000   2.13096325
  0.91330000   2.13096145
  0.91330000   2.13095973
  0.91330000   2.13095809
  0.91330000   2.13095652
  0.91340000   2.13174399
  0.91340000   2.13173723
  0.91340000   2.13173111
  0.91340000   2.13172553
  0.91340000   2.13172043
  0.91340000   2.13171574
  0.91340000   2.13171141
  0.91340000   2.13170741
  0.91340000   2.13170369
  0.91340000   2.13170024
  0.91340000   2.13169701
  0.91340000   2.13169399
  0.91340000   2.13169116
  0.91340000   2.13168850
  0.91340000   2.13168600
  0.91340000   2.13168363
  0.91340000   2.13168140
  0.91340000   2.13167929
  0.91340000   2.13167728
  0.91340000   2.13167538
  0.91340000   2.13167358
  0.91340000   2.13167186
  0.91340000   2.13167022
  0.91340000   2.13166865
  0.91350000   2.13245356
  0.91350000   2.13244680
  0.91350000   2.13244068
  0.91350000   2.13243510
  0.91350000   2.13243000
  0.91350000   2.13242531
  0.91350000   2.13242098
  0.91350000   2.13241698
  0.91350000   2.13241326
  0.91350000   2.13240980
  0.91350000   2.13240658
  0.91350000   2.13240356
  0.91350000   2.13240073
  0.91350000   2.13239806
  0.91350000   2.13239556
  0.91350000   2.13239320
  0.91350000   2.13239096
  0.91350000   2.13238885
  0.91350000   2.13238685
  0.91350000   2.13238494
  0.91350000   2.13238313
  0.91350000   2.13238141
  0.91350000   2.13237977
  0.91350000   2.13237821
  0.91360000   2.13316057
  0.91360000   2.13315382
  0.91360000   2.13314770
  0.91360000   2.13314212
  0.91360000   2.13313701
  0.91360000   2.13313232
  0.91360000   2.13312800
  0.91360000   2.13312399
  0.91360000   2.13312028
  0.91360000   2.13311682
  0.91360000   2.13311359
  0.91360000   2.13311057
  0.91360000   2.13310774
  0.91360000   2.13310507
  0.91360000   2.13310257
  0.91360000   2.13310020
  0.91360000   2.13309797
  0.91360000   2.13309586
  0.91360000   2.13309385
  0.91360000   2.13309195
  0.91360000   2.13309014
  0.91360000   2.13308842
  0.91360000   2.13308677
  0.91360000   2.13308521
  0.91370000   2.13386505
  0.91370000   2.13385830
  0.91370000   2.13385217
  0.91370000   2.13384660
  0.91370000   2.13384149
  0.91370000   2.13383680
  0.91370000   2.13383247
  0.91370000   2.13382847
  0.91370000   2.13382475
  0.91370000   2.13382129
  0.91370000   2.13381806
  0.91370000   2.13381504
  0.91370000   2.13381221
  0.91370000   2.13380954
  0.91370000   2.13380704
  0.91370000   2.13380467
  0.91370000   2.13380244
  0.91370000   2.13380032
  0.91370000   2.13379832
  0.91370000   2.13379641
  0.91370000   2.13379460
  0.91370000   2.13379288
  0.91370000   2.13379124
  0.91370000   2.13378967
  0.91380000   2.13456700
  0.91380000   2.13456025
  0.91380000   2.13455413
  0.91380000   2.13454855
  0.91380000   2.13454344
  0.91380000   2.13453875
  0.91380000   2.13453442
  0.91380000   2.13453042
  0.91380000   2.13452670
  0.91380000   2.13452324
  0.91380000   2.13452001
  0.91380000   2.13451699
  0.91380000   2.13451415
  0.91380000   2.13451149
  0.91380000   2.13450898
  0.91380000   2.13450661
  0.91380000   2.13450438
  0.91380000   2.13450226
  0.91380000   2.13450026
  0.91380000   2.13449835
  0.91380000   2.13449654
  0.91380000   2.13449482
  0.91380000   2.13449317
  0.91380000   2.13449160
  0.91390000   2.13526644
  0.91390000   2.13525969
  0.91390000   2.13525357
  0.91390000   2.13524799
  0.91390000   2.13524289
  0.91390000   2.13523819
  0.91390000   2.13523387
  0.91390000   2.13522986
  0.91390000   2.13522614
  0.91390000   2.13522268
  0.91390000   2.13521945
  0.91390000   2.13521642
  0.91390000   2.13521359
  0.91390000   2.13521093
  0.91390000   2.13520842
  0.91390000   2.13520605
  0.91390000   2.13520381
  0.91390000   2.13520169
  0.91390000   2.13519969
  0.91390000   2.13519778
  0.91390000   2.13519597
  0.91390000   2.13519424
  0.91390000   2.13519260
  0.91390000   2.13519103
  0.91400000   2.13596338
  0.91400000   2.13595664
  0.91400000   2.13595052
  0.91400000   2.13594494
  0.91400000   2.13593983
  0.91400000   2.13593514
  0.91400000   2.13593081
  0.91400000   2.13592681
  0.91400000   2.13592309
  0.91400000   2.13591962
  0.91400000   2.13591639
  0.91400000   2.13591337
  0.91400000   2.13591053
  0.91400000   2.13590787
  0.91400000   2.13590536
  0.91400000   2.13590299
  0.91400000   2.13590075
  0.91400000   2.13589863
  0.91400000   2.13589662
  0.91400000   2.13589472
  0.91400000   2.13589291
  0.91400000   2.13589118
  0.91400000   2.13588953
  0.91400000   2.13588797
  0.91410000   2.13665785
  0.91410000   2.13665110
  0.91410000   2.13664499
  0.91410000   2.13663941
  0.91410000   2.13663430
  0.91410000   2.13662961
  0.91410000   2.13662528
  0.91410000   2.13662128
  0.91410000   2.13661756
  0.91410000   2.13661409
  0.91410000   2.13661086
  0.91410000   2.13660783
  0.91410000   2.13660500
  0.91410000   2.13660233
  0.91410000   2.13659982
  0.91410000   2.13659745
  0.91410000   2.13659521
  0.91410000   2.13659309
  0.91410000   2.13659108
  0.91410000   2.13658918
  0.91410000   2.13658736
  0.91410000   2.13658564
  0.91410000   2.13658399
  0.91410000   2.13658242
  0.91420000   2.13734986
  0.91420000   2.13734311
  0.91420000   2.13733699
  0.91420000   2.13733142
  0.91420000   2.13732631
  0.91420000   2.13732162
  0.91420000   2.13731729
  0.91420000   2.13731328
  0.91420000   2.13730956
  0.91420000   2.13730610
  0.91420000   2.13730286
  0.91420000   2.13729984
  0.91420000   2.13729700
  0.91420000   2.13729433
  0.91420000   2.13729182
  0.91420000   2.13728945
  0.91420000   2.13728721
  0.91420000   2.13728509
  0.91420000   2.13728308
  0.91420000   2.13728117
  0.91420000   2.13727936
  0.91420000   2.13727763
  0.91420000   2.13727598
  0.91420000   2.13727441
  0.91430000   2.13803941
  0.91430000   2.13803267
  0.91430000   2.13802655
  0.91430000   2.13802097
  0.91430000   2.13801587
  0.91430000   2.13801118
  0.91430000   2.13800685
  0.91430000   2.13800284
  0.91430000   2.13799912
  0.91430000   2.13799565
  0.91430000   2.13799242
  0.91430000   2.13798939
  0.91430000   2.13798655
  0.91430000   2.13798388
  0.91430000   2.13798137
  0.91430000   2.13797900
  0.91430000   2.13797676
  0.91430000   2.13797464
  0.91430000   2.13797263
  0.91430000   2.13797072
  0.91430000   2.13796890
  0.91430000   2.13796717
  0.91430000   2.13796553
  0.91430000   2.13796395
  0.91440000   2.13872653
  0.91440000   2.13871979
  0.91440000   2.13871367
  0.91440000   2.13870810
  0.91440000   2.13870299
  0.91440000   2.13869830
  0.91440000   2.13869397
  0.91440000   2.13868996
  0.91440000   2.13868624
  0.91440000   2.13868277
  0.91440000   2.13867954
  0.91440000   2.13867651
  0.91440000   2.13867367
  0.91440000   2.13867100
  0.91440000   2.13866849
  0.91440000   2.13866611
  0.91440000   2.13866387
  0.91440000   2.13866175
  0.91440000   2.13865974
  0.91440000   2.13865783
  0.91440000   2.13865601
  0.91440000   2.13865428
  0.91440000   2.13865264
  0.91440000   2.13865106
  0.91450000   2.13941124
  0.91450000   2.13940450
  0.91450000   2.13939838
  0.91450000   2.13939280
  0.91450000   2.13938770
  0.91450000   2.13938300
  0.91450000   2.13937867
  0.91450000   2.13937466
  0.91450000   2.13937094
  0.91450000   2.13936747
  0.91450000   2.13936424
  0.91450000   2.13936121
  0.91450000   2.13935837
  0.91450000   2.13935570
  0.91450000   2.13935318
  0.91450000   2.13935081
  0.91450000   2.13934857
  0.91450000   2.13934645
  0.91450000   2.13934443
  0.91450000   2.13934252
  0.91450000   2.13934071
  0.91450000   2.13933898
  0.91450000   2.13933733
  0.91450000   2.13933575
  0.91460000   2.14009353
  0.91460000   2.14008679
  0.91460000   2.14008068
  0.91460000   2.14007510
  0.91460000   2.14007000
  0.91460000   2.14006530
  0.91460000   2.14006097
  0.91460000   2.14005696
  0.91460000   2.14005324
  0.91460000   2.14004977
  0.91460000   2.14004653
  0.91460000   2.14004350
  0.91460000   2.14004066
  0.91460000   2.14003799
  0.91460000   2.14003548
  0.91460000   2.14003310
  0.91460000   2.14003086
  0.91460000   2.14002874
  0.91460000   2.14002672
  0.91460000   2.14002481
  0.91460000   2.14002299
  0.91460000   2.14002126
  0.91460000   2.14001961
  0.91460000   2.14001804
  0.91470000   2.14077344
  0.91470000   2.14076670
  0.91470000   2.14076059
  0.91470000   2.14075501
  0.91470000   2.14074991
  0.91470000   2.14074521
  0.91470000   2.14074088
  0.91470000   2.14073687
  0.91470000   2.14073315
  0.91470000   2.14072968
  0.91470000   2.14072644
  0.91470000   2.14072341
  0.91470000   2.14072057
  0.91470000   2.14071790
  0.91470000   2.14071538
  0.91470000   2.14071300
  0.91470000   2.14071076
  0.91470000   2.14070864
  0.91470000   2.14070662
  0.91470000   2.14070471
  0.91470000   2.14070289
  0.91470000   2.14070116
  0.91470000   2.14069951
  0.91470000   2.14069793
  0.91480000   2.14145097
  0.91480000   2.14144424
  0.91480000   2.14143812
  0.91480000   2.14143255
  0.91480000   2.14142744
  0.91480000   2.14142274
  0.91480000   2.14141841
  0.91480000   2.14141440
  0.91480000   2.14141068
  0.91480000   2.14140721
  0.91480000   2.14140397
  0.91480000   2.14140094
  0.91480000   2.14139809
  0.91480000   2.14139542
  0.91480000   2.14139291
  0.91480000   2.14139053
  0.91480000   2.14138829
  0.91480000   2.14138616
  0.91480000   2.14138415
  0.91480000   2.14138223
  0.91480000   2.14138041
  0.91480000   2.14137868
  0.91480000   2.14137703
  0.91480000   2.14137545
  0.91490000   2.14212614
  0.91490000   2.14211941
  0.91490000   2.14211329
  0.91490000   2.14210772
  0.91490000   2.14210261
  0.91490000   2.14209792
  0.91490000   2.14209358
  0.91490000   2.14208957
  0.91490000   2.14208585
  0.91490000   2.14208238
  0.91490000   2.14207914
  0.91490000   2.14207610
  0.91490000   2.14207326
  0.91490000   2.14207059
  0.91490000   2.14206807
  0.91490000   2.14206569
  0.91490000   2.14206345
  0.91490000   2.14206132
  0.91490000   2.14205931
  0.91490000   2.14205739
  0.91490000   2.14205557
  0.91490000   2.14205384
  0.91490000   2.14205219
  0.91490000   2.14205061
  0.91500000   2.14279897
  0.91500000   2.14279223
  0.91500000   2.14278612
  0.91500000   2.14278054
  0.91500000   2.14277543
  0.91500000   2.14277074
  0.91500000   2.14276641
  0.91500000   2.14276239
  0.91500000   2.14275867
  0.91500000   2.14275520
  0.91500000   2.14275196
  0.91500000   2.14274892
  0.91500000   2.14274608
  0.91500000   2.14274341
  0.91500000   2.14274089
  0.91500000   2.14273851
  0.91500000   2.14273626
  0.91500000   2.14273414
  0.91500000   2.14273212
  0.91500000   2.14273020
  0.91500000   2.14272838
  0.91500000   2.14272665
  0.91500000   2.14272500
  0.91500000   2.14272342
  0.91510000   2.14346945
  0.91510000   2.14346272
  0.91510000   2.14345661
  0.91510000   2.14345103
  0.91510000   2.14344592
  0.91510000   2.14344123
  0.91510000   2.14343689
  0.91510000   2.14343288
  0.91510000   2.14342916
  0.91510000   2.14342568
  0.91510000   2.14342244
  0.91510000   2.14341941
  0.91510000   2.14341656
  0.91510000   2.14341389
  0.91510000   2.14341137
  0.91510000   2.14340899
  0.91510000   2.14340674
  0.91510000   2.14340462
  0.91510000   2.14340260
  0.91510000   2.14340068
  0.91510000   2.14339886
  0.91510000   2.14339713
  0.91510000   2.14339547
  0.91510000   2.14339389
  0.91520000   2.14413762
  0.91520000   2.14413089
  0.91520000   2.14412478
  0.91520000   2.14411920
  0.91520000   2.14411409
  0.91520000   2.14410940
  0.91520000   2.14410506
  0.91520000   2.14410105
  0.91520000   2.14409732
  0.91520000   2.14409385
  0.91520000   2.14409061
  0.91520000   2.14408757
  0.91520000   2.14408473
  0.91520000   2.14408205
  0.91520000   2.14407953
  0.91520000   2.14407715
  0.91520000   2.14407491
  0.91520000   2.14407278
  0.91520000   2.14407076
  0.91520000   2.14406884
  0.91520000   2.14406702
  0.91520000   2.14406528
  0.91520000   2.14406363
  0.91520000   2.14406205
  0.91530000   2.14480348
  0.91530000   2.14479675
  0.91530000   2.14479064
  0.91530000   2.14478506
  0.91530000   2.14477996
  0.91530000   2.14477526
  0.91530000   2.14477093
  0.91530000   2.14476691
  0.91530000   2.14476318
  0.91530000   2.14475971
  0.91530000   2.14475647
  0.91530000   2.14475343
  0.91530000   2.14475059
  0.91530000   2.14474791
  0.91530000   2.14474539
  0.91530000   2.14474301
  0.91530000   2.14474076
  0.91530000   2.14473863
  0.91530000   2.14473661
  0.91530000   2.14473469
  0.91530000   2.14473287
  0.91530000   2.14473113
  0.91530000   2.14472948
  0.91530000   2.14472790
  0.91540000   2.14546705
  0.91540000   2.14546032
  0.91540000   2.14545421
  0.91540000   2.14544863
  0.91540000   2.14544353
  0.91540000   2.14543883
  0.91540000   2.14543450
  0.91540000   2.14543048
  0.91540000   2.14542675
  0.91540000   2.14542328
  0.91540000   2.14542004
  0.91540000   2.14541700
  0.91540000   2.14541415
  0.91540000   2.14541147
  0.91540000   2.14540895
  0.91540000   2.14540657
  0.91540000   2.14540432
  0.91540000   2.14540219
  0.91540000   2.14540017
  0.91540000   2.14539825
  0.91540000   2.14539643
  0.91540000   2.14539469
  0.91540000   2.14539304
  0.91540000   2.14539146
  0.91550000   2.14612834
  0.91550000   2.14612161
  0.91550000   2.14611550
  0.91550000   2.14610993
  0.91550000   2.14610482
  0.91550000   2.14610012
  0.91550000   2.14609579
  0.91550000   2.14609177
  0.91550000   2.14608804
  0.91550000   2.14608457
  0.91550000   2.14608132
  0.91550000   2.14607829
  0.91550000   2.14607544
  0.91550000   2.14607276
  0.91550000   2.14607024
  0.91550000   2.14606786
  0.91550000   2.14606560
  0.91550000   2.14606347
  0.91550000   2.14606145
  0.91550000   2.14605953
  0.91550000   2.14605771
  0.91550000   2.14605597
  0.91550000   2.14605431
  0.91550000   2.14605273
  0.91560000   2.14678736
  0.91560000   2.14678063
  0.91560000   2.14677452
  0.91560000   2.14676895
  0.91560000   2.14676384
  0.91560000   2.14675915
  0.91560000   2.14675481
  0.91560000   2.14675079
  0.91560000   2.14674706
  0.91560000   2.14674359
  0.91560000   2.14674034
  0.91560000   2.14673731
  0.91560000   2.14673446
  0.91560000   2.14673178
  0.91560000   2.14672925
  0.91560000   2.14672687
  0.91560000   2.14672462
  0.91560000   2.14672249
  0.91560000   2.14672047
  0.91560000   2.14671855
  0.91560000   2.14671672
  0.91560000   2.14671498
  0.91560000   2.14671333
  0.91560000   2.14671174
  0.91570000   2.14744413
  0.91570000   2.14743741
  0.91570000   2.14743130
  0.91570000   2.14742572
  0.91570000   2.14742062
  0.91570000   2.14741592
  0.91570000   2.14741158
  0.91570000   2.14740756
  0.91570000   2.14740383
  0.91570000   2.14740036
  0.91570000   2.14739711
  0.91570000   2.14739408
  0.91570000   2.14739122
  0.91570000   2.14738854
  0.91570000   2.14738602
  0.91570000   2.14738364
  0.91570000   2.14738138
  0.91570000   2.14737925
  0.91570000   2.14737723
  0.91570000   2.14737531
  0.91570000   2.14737348
  0.91570000   2.14737174
  0.91570000   2.14737009
  0.91570000   2.14736850
  0.91580000   2.14809867
  0.91580000   2.14809194
  0.91580000   2.14808583
  0.91580000   2.14808025
  0.91580000   2.14807515
  0.91580000   2.14807045
  0.91580000   2.14806611
  0.91580000   2.14806210
  0.91580000   2.14805836
  0.91580000   2.14805489
  0.91580000   2.14805164
  0.91580000   2.14804860
  0.91580000   2.14804575
  0.91580000   2.14804307
  0.91580000   2.14804055
  0.91580000   2.14803816
  0.91580000   2.14803591
  0.91580000   2.14803378
  0.91580000   2.14803175
  0.91580000   2.14802983
  0.91580000   2.14802800
  0.91580000   2.14802626
  0.91580000   2.14802461
  0.91580000   2.14802302
  0.91590000   2.14875097
  0.91590000   2.14874424
  0.91590000   2.14873813
  0.91590000   2.14873256
  0.91590000   2.14872745
  0.91590000   2.14872276
  0.91590000   2.14871842
  0.91590000   2.14871440
  0.91590000   2.14871067
  0.91590000   2.14870719
  0.91590000   2.14870394
  0.91590000   2.14870090
  0.91590000   2.14869805
  0.91590000   2.14869537
  0.91590000   2.14869285
  0.91590000   2.14869046
  0.91590000   2.14868821
  0.91590000   2.14868607
  0.91590000   2.14868405
  0.91590000   2.14868213
  0.91590000   2.14868030
  0.91590000   2.14867856
  0.91590000   2.14867690
  0.91590000   2.14867531
  0.91600000   2.14940106
  0.91600000   2.14939433
  0.91600000   2.14938823
  0.91600000   2.14938265
  0.91600000   2.14937755
  0.91600000   2.14937285
  0.91600000   2.14936851
  0.91600000   2.14936449
  0.91600000   2.14936076
  0.91600000   2.14935728
  0.91600000   2.14935403
  0.91600000   2.14935099
  0.91600000   2.14934814
  0.91600000   2.14934546
  0.91600000   2.14934293
  0.91600000   2.14934055
  0.91600000   2.14933829
  0.91600000   2.14933616
  0.91600000   2.14933413
  0.91600000   2.14933221
  0.91600000   2.14933038
  0.91600000   2.14932864
  0.91600000   2.14932698
  0.91600000   2.14932539
  0.91610000   2.15004895
  0.91610000   2.15004223
  0.91610000   2.15003612
  0.91610000   2.15003054
  0.91610000   2.15002544
  0.91610000   2.15002074
  0.91610000   2.15001640
  0.91610000   2.15001238
  0.91610000   2.15000865
  0.91610000   2.15000517
  0.91610000   2.15000192
  0.91610000   2.14999888
  0.91610000   2.14999603
  0.91610000   2.14999334
  0.91610000   2.14999082
  0.91610000   2.14998843
  0.91610000   2.14998618
  0.91610000   2.14998404
  0.91610000   2.14998201
  0.91610000   2.14998009
  0.91610000   2.14997826
  0.91610000   2.14997652
  0.91610000   2.14997486
  0.91610000   2.14997327
  0.91620000   2.15069465
  0.91620000   2.15068793
  0.91620000   2.15068182
  0.91620000   2.15067625
  0.91620000   2.15067114
  0.91620000   2.15066644
  0.91620000   2.15066210
  0.91620000   2.15065808
  0.91620000   2.15065435
  0.91620000   2.15065087
  0.91620000   2.15064762
  0.91620000   2.15064458
  0.91620000   2.15064173
  0.91620000   2.15063904
  0.91620000   2.15063651
  0.91620000   2.15063413
  0.91620000   2.15063187
  0.91620000   2.15062973
  0.91620000   2.15062771
  0.91620000   2.15062578
  0.91620000   2.15062395
  0.91620000   2.15062221
  0.91620000   2.15062055
  0.91620000   2.15061896
  0.91630000   2.15133818
  0.91630000   2.15133145
  0.91630000   2.15132535
  0.91630000   2.15131978
  0.91630000   2.15131467
  0.91630000   2.15130997
  0.91630000   2.15130563
  0.91630000   2.15130161
  0.91630000   2.15129788
  0.91630000   2.15129440
  0.91630000   2.15129115
  0.91630000   2.15128810
  0.91630000   2.15128525
  0.91630000   2.15128256
  0.91630000   2.15128003
  0.91630000   2.15127765
  0.91630000   2.15127539
  0.91630000   2.15127325
  0.91630000   2.15127123
  0.91630000   2.15126930
  0.91630000   2.15126747
  0.91630000   2.15126573
  0.91630000   2.15126406
  0.91630000   2.15126248
  0.91640000   2.15197954
  0.91640000   2.15197282
  0.91640000   2.15196671
  0.91640000   2.15196114
  0.91640000   2.15195603
  0.91640000   2.15195133
  0.91640000   2.15194699
  0.91640000   2.15194297
  0.91640000   2.15193924
  0.91640000   2.15193576
  0.91640000   2.15193251
  0.91640000   2.15192946
  0.91640000   2.15192661
  0.91640000   2.15192392
  0.91640000   2.15192139
  0.91640000   2.15191901
  0.91640000   2.15191675
  0.91640000   2.15191461
  0.91640000   2.15191258
  0.91640000   2.15191066
  0.91640000   2.15190882
  0.91640000   2.15190708
  0.91640000   2.15190542
  0.91640000   2.15190383
  0.91650000   2.15261875
  0.91650000   2.15261203
  0.91650000   2.15260593
  0.91650000   2.15260035
  0.91650000   2.15259525
  0.91650000   2.15259055
  0.91650000   2.15258621
  0.91650000   2.15258219
  0.91650000   2.15257845
  0.91650000   2.15257497
  0.91650000   2.15257172
  0.91650000   2.15256867
  0.91650000   2.15256582
  0.91650000   2.15256313
  0.91650000   2.15256060
  0.91650000   2.15255821
  0.91650000   2.15255595
  0.91650000   2.15255382
  0.91650000   2.15255179
  0.91650000   2.15254986
  0.91650000   2.15254803
  0.91650000   2.15254628
  0.91650000   2.15254462
  0.91650000   2.15254303
  0.91660000   2.15325583
  0.91660000   2.15324911
  0.91660000   2.15324300
  0.91660000   2.15323743
  0.91660000   2.15323232
  0.91660000   2.15322762
  0.91660000   2.15322328
  0.91660000   2.15321926
  0.91660000   2.15321553
  0.91660000   2.15321204
  0.91660000   2.15320879
  0.91660000   2.15320575
  0.91660000   2.15320289
  0.91660000   2.15320020
  0.91660000   2.15319767
  0.91660000   2.15319528
  0.91660000   2.15319302
  0.91660000   2.15319088
  0.91660000   2.15318885
  0.91660000   2.15318693
  0.91660000   2.15318509
  0.91660000   2.15318335
  0.91660000   2.15318168
  0.91660000   2.15318009
  0.91670000   2.15389078
  0.91670000   2.15388406
  0.91670000   2.15387795
  0.91670000   2.15387238
  0.91670000   2.15386727
  0.91670000   2.15386257
  0.91670000   2.15385823
  0.91670000   2.15385421
  0.91670000   2.15385047
  0.91670000   2.15384699
  0.91670000   2.15384374
  0.91670000   2.15384069
  0.91670000   2.15383783
  0.91670000   2.15383515
  0.91670000   2.15383261
  0.91670000   2.15383022
  0.91670000   2.15382796
  0.91670000   2.15382582
  0.91670000   2.15382379
  0.91670000   2.15382187
  0.91670000   2.15382003
  0.91670000   2.15381829
  0.91670000   2.15381662
  0.91670000   2.15381503
  0.91680000   2.15452361
  0.91680000   2.15451689
  0.91680000   2.15451079
  0.91680000   2.15450522
  0.91680000   2.15450011
  0.91680000   2.15449541
  0.91680000   2.15449107
  0.91680000   2.15448705
  0.91680000   2.15448331
  0.91680000   2.15447983
  0.91680000   2.15447657
  0.91680000   2.15447353
  0.91680000   2.15447067
  0.91680000   2.15446798
  0.91680000   2.15446544
  0.91680000   2.15446305
  0.91680000   2.15446079
  0.91680000   2.15445865
  0.91680000   2.15445662
  0.91680000   2.15445469
  0.91680000   2.15445286
  0.91680000   2.15445111
  0.91680000   2.15444945
  0.91680000   2.15444785
  0.91690000   2.15515434
  0.91690000   2.15514763
  0.91690000   2.15514152
  0.91690000   2.15513595
  0.91690000   2.15513084
  0.91690000   2.15512614
  0.91690000   2.15512180
  0.91690000   2.15511778
  0.91690000   2.15511404
  0.91690000   2.15511056
  0.91690000   2.15510730
  0.91690000   2.15510426
  0.91690000   2.15510140
  0.91690000   2.15509871
  0.91690000   2.15509617
  0.91690000   2.15509378
  0.91690000   2.15509152
  0.91690000   2.15508938
  0.91690000   2.15508735
  0.91690000   2.15508542
  0.91690000   2.15508358
  0.91690000   2.15508183
  0.91690000   2.15508017
  0.91690000   2.15507858
  0.91700000   2.15578299
  0.91700000   2.15577627
  0.91700000   2.15577017
  0.91700000   2.15576459
  0.91700000   2.15575949
  0.91700000   2.15575479
  0.91700000   2.15575044
  0.91700000   2.15574642
  0.91700000   2.15574268
  0.91700000   2.15573920
  0.91700000   2.15573594
  0.91700000   2.15573290
  0.91700000   2.15573004
  0.91700000   2.15572735
  0.91700000   2.15572481
  0.91700000   2.15572242
  0.91700000   2.15572016
  0.91700000   2.15571801
  0.91700000   2.15571598
  0.91700000   2.15571405
  0.91700000   2.15571222
  0.91700000   2.15571047
  0.91700000   2.15570880
  0.91700000   2.15570721
  0.91710000   2.15640955
  0.91710000   2.15640283
  0.91710000   2.15639673
  0.91710000   2.15639116
  0.91710000   2.15638605
  0.91710000   2.15638135
  0.91710000   2.15637701
  0.91710000   2.15637299
  0.91710000   2.15636925
  0.91710000   2.15636576
  0.91710000   2.15636251
  0.91710000   2.15635946
  0.91710000   2.15635660
  0.91710000   2.15635391
  0.91710000   2.15635137
  0.91710000   2.15634898
  0.91710000   2.15634672
  0.91710000   2.15634457
  0.91710000   2.15634254
  0.91710000   2.15634061
  0.91710000   2.15633877
  0.91710000   2.15633702
  0.91710000   2.15633535
  0.91710000   2.15633376
  0.91720000   2.15703405
  0.91720000   2.15702733
  0.91720000   2.15702123
  0.91720000   2.15701566
  0.91720000   2.15701055
  0.91720000   2.15700585
  0.91720000   2.15700151
  0.91720000   2.15699748
  0.91720000   2.15699374
  0.91720000   2.15699026
  0.91720000   2.15698700
  0.91720000   2.15698395
  0.91720000   2.15698109
  0.91720000   2.15697840
  0.91720000   2.15697587
  0.91720000   2.15697347
  0.91720000   2.15697121
  0.91720000   2.15696906
  0.91720000   2.15696703
  0.91720000   2.15696510
  0.91720000   2.15696326
  0.91720000   2.15696151
  0.91720000   2.15695984
  0.91720000   2.15695825
  0.91730000   2.15765649
  0.91730000   2.15764978
  0.91730000   2.15764368
  0.91730000   2.15763811
  0.91730000   2.15763300
  0.91730000   2.15762830
  0.91730000   2.15762395
  0.91730000   2.15761993
  0.91730000   2.15761619
  0.91730000   2.15761270
  0.91730000   2.15760945
  0.91730000   2.15760640
  0.91730000   2.15760353
  0.91730000   2.15760084
  0.91730000   2.15759830
  0.91730000   2.15759591
  0.91730000   2.15759365
  0.91730000   2.15759150
  0.91730000   2.15758947
  0.91730000   2.15758753
  0.91730000   2.15758570
  0.91730000   2.15758395
  0.91730000   2.15758228
  0.91730000   2.15758068
  0.91740000   2.15827689
  0.91740000   2.15827018
  0.91740000   2.15826408
  0.91740000   2.15825851
  0.91740000   2.15825340
  0.91740000   2.15824870
  0.91740000   2.15824435
  0.91740000   2.15824033
  0.91740000   2.15823659
  0.91740000   2.15823310
  0.91740000   2.15822984
  0.91740000   2.15822679
  0.91740000   2.15822393
  0.91740000   2.15822124
  0.91740000   2.15821870
  0.91740000   2.15821631
  0.91740000   2.15821404
  0.91740000   2.15821189
  0.91740000   2.15820986
  0.91740000   2.15820793
  0.91740000   2.15820609
  0.91740000   2.15820434
  0.91740000   2.15820267
  0.91740000   2.15820107
  0.91750000   2.15889526
  0.91750000   2.15888855
  0.91750000   2.15888245
  0.91750000   2.15887688
  0.91750000   2.15887177
  0.91750000   2.15886707
  0.91750000   2.15886272
  0.91750000   2.15885870
  0.91750000   2.15885496
  0.91750000   2.15885147
  0.91750000   2.15884821
  0.91750000   2.15884516
  0.91750000   2.15884230
  0.91750000   2.15883960
  0.91750000   2.15883706
  0.91750000   2.15883467
  0.91750000   2.15883240
  0.91750000   2.15883026
  0.91750000   2.15882822
  0.91750000   2.15882629
  0.91750000   2.15882445
  0.91750000   2.15882270
  0.91750000   2.15882103
  0.91750000   2.15881943
  0.91760000   2.15951161
  0.91760000   2.15950490
  0.91760000   2.15949880
  0.91760000   2.15949323
  0.91760000   2.15948812
  0.91760000   2.15948342
  0.91760000   2.15947907
  0.91760000   2.15947505
  0.91760000   2.15947130
  0.91760000   2.15946782
  0.91760000   2.15946456
  0.91760000   2.15946151
  0.91760000   2.15945864
  0.91760000   2.15945595
  0.91760000   2.15945341
  0.91760000   2.15945101
  0.91760000   2.15944875
  0.91760000   2.15944660
  0.91760000   2.15944456
  0.91760000   2.15944263
  0.91760000   2.15944079
  0.91760000   2.15943904
  0.91760000   2.15943737
  0.91760000   2.15943577
  0.91770000   2.16012594
  0.91770000   2.16011924
  0.91770000   2.16011314
  0.91770000   2.16010757
  0.91770000   2.16010246
  0.91770000   2.16009776
  0.91770000   2.16009341
  0.91770000   2.16008938
  0.91770000   2.16008564
  0.91770000   2.16008216
  0.91770000   2.16007890
  0.91770000   2.16007584
  0.91770000   2.16007298
  0.91770000   2.16007028
  0.91770000   2.16006774
  0.91770000   2.16006535
  0.91770000   2.16006308
  0.91770000   2.16006093
  0.91770000   2.16005890
  0.91770000   2.16005696
  0.91770000   2.16005512
  0.91770000   2.16005337
  0.91770000   2.16005170
  0.91770000   2.16005010
  0.91780000   2.16073829
  0.91780000   2.16073158
  0.91780000   2.16072548
  0.91780000   2.16071991
  0.91780000   2.16071480
  0.91780000   2.16071010
  0.91780000   2.16070575
  0.91780000   2.16070173
  0.91780000   2.16069798
  0.91780000   2.16069450
  0.91780000   2.16069124
  0.91780000   2.16068818
  0.91780000   2.16068532
  0.91780000   2.16068262
  0.91780000   2.16068008
  0.91780000   2.16067768
  0.91780000   2.16067542
  0.91780000   2.16067327
  0.91780000   2.16067123
  0.91780000   2.16066929
  0.91780000   2.16066745
  0.91780000   2.16066570
  0.91780000   2.16066403
  0.91780000   2.16066243
  0.91790000   2.16134864
  0.91790000   2.16134193
  0.91790000   2.16133583
  0.91790000   2.16133026
  0.91790000   2.16132516
  0.91790000   2.16132045
  0.91790000   2.16131611
  0.91790000   2.16131208
  0.91790000   2.16130834
  0.91790000   2.16130485
  0.91790000   2.16130159
  0.91790000   2.16129854
  0.91790000   2.16129567
  0.91790000   2.16129297
  0.91790000   2.16129043
  0.91790000   2.16128803
  0.91790000   2.16128576
  0.91790000   2.16128362
  0.91790000   2.16128158
  0.91790000   2.16127964
  0.91790000   2.16127780
  0.91790000   2.16127605
  0.91790000   2.16127437
  0.91790000   2.16127278
  0.91800000   2.16195702
  0.91800000   2.16195031
  0.91800000   2.16194421
  0.91800000   2.16193865
  0.91800000   2.16193354
  0.91800000   2.16192883
  0.91800000   2.16192449
  0.91800000   2.16192046
  0.91800000   2.16191672
  0.91800000   2.16191323
  0.91800000   2.16190997
  0.91800000   2.16190691
  0.91800000   2.16190404
  0.91800000   2.16190135
  0.91800000   2.16189881
  0.91800000   2.16189641
  0.91800000   2.16189414
  0.91800000   2.16189199
  0.91800000   2.16188995
  0.91800000   2.16188801
  0.91800000   2.16188617
  0.91800000   2.16188442
  0.91800000   2.16188274
  0.91800000   2.16188114
  0.91810000   2.16256343
  0.91810000   2.16255673
  0.91810000   2.16255063
  0.91810000   2.16254506
  0.91810000   2.16253995
  0.91810000   2.16253525
  0.91810000   2.16253090
  0.91810000   2.16252687
  0.91810000   2.16252313
  0.91810000   2.16251964
  0.91810000   2.16251638
  0.91810000   2.16251332
  0.91810000   2.16251046
  0.91810000   2.16250776
  0.91810000   2.16250522
  0.91810000   2.16250282
  0.91810000   2.16250055
  0.91810000   2.16249840
  0.91810000   2.16249636
  0.91810000   2.16249442
  0.91810000   2.16249258
  0.91810000   2.16249082
  0.91810000   2.16248915
  0.91810000   2.16248755
  0.91820000   2.16316789
  0.91820000   2.16316119
  0.91820000   2.16315509
  0.91820000   2.16314952
  0.91820000   2.16314441
  0.91820000   2.16313971
  0.91820000   2.16313536
  0.91820000   2.16313134
  0.91820000   2.16312759
  0.91820000   2.16312410
  0.91820000   2.16312084
  0.91820000   2.16311778
  0.91820000   2.16311491
  0.91820000   2.16311222
  0.91820000   2.16310967
  0.91820000   2.16310727
  0.91820000   2.16310500
  0.91820000   2.16310285
  0.91820000   2.16310081
  0.91820000   2.16309887
  0.91820000   2.16309703
  0.91820000   2.16309527
  0.91820000   2.16309360
  0.91820000   2.16309200
  0.91830000   2.16377041
  0.91830000   2.16376370
  0.91830000   2.16375761
  0.91830000   2.16375204
  0.91830000   2.16374693
  0.91830000   2.16374223
  0.91830000   2.16373788
  0.91830000   2.16373385
  0.91830000   2.16373011
  0.91830000   2.16372662
  0.91830000   2.16372335
  0.91830000   2.16372030
  0.91830000   2.16371743
  0.91830000   2.16371473
  0.91830000   2.16371219
  0.91830000   2.16370979
  0.91830000   2.16370751
  0.91830000   2.16370536
  0.91830000   2.16370332
  0.91830000   2.16370138
  0.91830000   2.16369954
  0.91830000   2.16369778
  0.91830000   2.16369611
  0.91830000   2.16369451
  0.91840000   2.16437099
  0.91840000   2.16436429
  0.91840000   2.16435819
  0.91840000   2.16435262
  0.91840000   2.16434752
  0.91840000   2.16434281
  0.91840000   2.16433847
  0.91840000   2.16433444
  0.91840000   2.16433069
  0.91840000   2.16432720
  0.91840000   2.16432394
  0.91840000   2.16432088
  0.91840000   2.16431801
  0.91840000   2.16431531
  0.91840000   2.16431277
  0.91840000   2.16431037
  0.91840000   2.16430809
  0.91840000   2.16430594
  0.91840000   2.16430390
  0.91840000   2.16430196
  0.91840000   2.16430012
  0.91840000   2.16429836
  0.91840000   2.16429668
  0.91840000   2.16429508
  0.91850000   2.16496965
  0.91850000   2.16496295
  0.91850000   2.16495686
  0.91850000   2.16495129
  0.91850000   2.16494618
  0.91850000   2.16494148
  0.91850000   2.16493713
  0.91850000   2.16493310
  0.91850000   2.16492935
  0.91850000   2.16492586
  0.91850000   2.16492260
  0.91850000   2.16491954
  0.91850000   2.16491667
  0.91850000   2.16491397
  0.91850000   2.16491143
  0.91850000   2.16490902
  0.91850000   2.16490675
  0.91850000   2.16490460
  0.91850000   2.16490256
  0.91850000   2.16490062
  0.91850000   2.16489877
  0.91850000   2.16489701
  0.91850000   2.16489534
  0.91850000   2.16489374
  0.91860000   2.16556640
  0.91860000   2.16555970
  0.91860000   2.16555361
  0.91860000   2.16554804
  0.91860000   2.16554293
  0.91860000   2.16553823
  0.91860000   2.16553388
  0.91860000   2.16552985
  0.91860000   2.16552611
  0.91860000   2.16552261
  0.91860000   2.16551935
  0.91860000   2.16551629
  0.91860000   2.16551342
  0.91860000   2.16551072
  0.91860000   2.16550817
  0.91860000   2.16550577
  0.91860000   2.16550350
  0.91860000   2.16550134
  0.91860000   2.16549930
  0.91860000   2.16549736
  0.91860000   2.16549552
  0.91860000   2.16549376
  0.91860000   2.16549208
  0.91860000   2.16549048
  0.91870000   2.16616125
  0.91870000   2.16615455
  0.91870000   2.16614846
  0.91870000   2.16614289
  0.91870000   2.16613778
  0.91870000   2.16613308
  0.91870000   2.16612873
  0.91870000   2.16612470
  0.91870000   2.16612096
  0.91870000   2.16611746
  0.91870000   2.16611420
  0.91870000   2.16611114
  0.91870000   2.16610827
  0.91870000   2.16610557
  0.91870000   2.16610302
  0.91870000   2.16610062
  0.91870000   2.16609834
  0.91870000   2.16609619
  0.91870000   2.16609415
  0.91870000   2.16609221
  0.91870000   2.16609036
  0.91870000   2.16608860
  0.91870000   2.16608692
  0.91870000   2.16608532
  0.91880000   2.16675421
  0.91880000   2.16674751
  0.91880000   2.16674142
  0.91880000   2.16673585
  0.91880000   2.16673075
  0.91880000   2.16672604
  0.91880000   2.16672169
  0.91880000   2.16671766
  0.91880000   2.16671392
  0.91880000   2.16671042
  0.91880000   2.16670716
  0.91880000   2.16670410
  0.91880000   2.16670123
  0.91880000   2.16669852
  0.91880000   2.16669598
  0.91880000   2.16669357
  0.91880000   2.16669130
  0.91880000   2.16668914
  0.91880000   2.16668710
  0.91880000   2.16668516
  0.91880000   2.16668331
  0.91880000   2.16668155
  0.91880000   2.16667987
  0.91880000   2.16667827
  0.91890000   2.16734529
  0.91890000   2.16733859
  0.91890000   2.16733250
  0.91890000   2.16732693
  0.91890000   2.16732183
  0.91890000   2.16731712
  0.91890000   2.16731277
  0.91890000   2.16730874
  0.91890000   2.16730499
  0.91890000   2.16730150
  0.91890000   2.16729824
  0.91890000   2.16729518
  0.91890000   2.16729230
  0.91890000   2.16728960
  0.91890000   2.16728705
  0.91890000   2.16728465
  0.91890000   2.16728237
  0.91890000   2.16728022
  0.91890000   2.16727817
  0.91890000   2.16727623
  0.91890000   2.16727438
  0.91890000   2.16727262
  0.91890000   2.16727095
  0.91890000   2.16726934
  0.91900000   2.16793450
  0.91900000   2.16792780
  0.91900000   2.16792171
  0.91900000   2.16791614
  0.91900000   2.16791104
  0.91900000   2.16790633
  0.91900000   2.16790198
  0.91900000   2.16789795
  0.91900000   2.16789420
  0.91900000   2.16789071
  0.91900000   2.16788744
  0.91900000   2.16788438
  0.91900000   2.16788151
  0.91900000   2.16787881
  0.91900000   2.16787626
  0.91900000   2.16787385
  0.91900000   2.16787158
  0.91900000   2.16786942
  0.91900000   2.16786738
  0.91900000   2.16786544
  0.91900000   2.16786359
  0.91900000   2.16786183
  0.91900000   2.16786015
  0.91900000   2.16785854
  0.91910000   2.16852185
  0.91910000   2.16851515
  0.91910000   2.16850906
  0.91910000   2.16850350
  0.91910000   2.16849839
  0.91910000   2.16849368
  0.91910000   2.16848933
  0.91910000   2.16848530
  0.91910000   2.16848155
  0.91910000   2.16847806
  0.91910000   2.16847479
  0.91910000   2.16847173
  0.91910000   2.16846886
  0.91910000   2.16846615
  0.91910000   2.16846361
  0.91910000   2.16846120
  0.91910000   2.16845892
  0.91910000   2.16845677
  0.91910000   2.16845472
  0.91910000   2.16845278
  0.91910000   2.16845093
  0.91910000   2.16844917
  0.91910000   2.16844749
  0.91910000   2.16844589
  0.91920000   2.16910735
  0.91920000   2.16910065
  0.91920000   2.16909456
  0.91920000   2.16908900
  0.91920000   2.16908389
  0.91920000   2.16907918
  0.91920000   2.16907483
  0.91920000   2.16907080
  0.91920000   2.16906705
  0.91920000   2.16906356
  0.91920000   2.16906029
  0.91920000   2.16905723
  0.91920000   2.16905436
  0.91920000   2.16905165
  0.91920000   2.16904910
  0.91920000   2.16904670
  0.91920000   2.16904442
  0.91920000   2.16904226
  0.91920000   2.16904022
  0.91920000   2.16903827
  0.91920000   2.16903642
  0.91920000   2.16903466
  0.91920000   2.16903298
  0.91920000   2.16903138
  0.91930000   2.16969101
  0.91930000   2.16968431
  0.91930000   2.16967822
  0.91930000   2.16967266
  0.91930000   2.16966755
  0.91930000   2.16966284
  0.91930000   2.16965850
  0.91930000   2.16965446
  0.91930000   2.16965071
  0.91930000   2.16964722
  0.91930000   2.16964395
  0.91930000   2.16964089
  0.91930000   2.16963801
  0.91930000   2.16963531
  0.91930000   2.16963276
  0.91930000   2.16963035
  0.91930000   2.16962808
  0.91930000   2.16962592
  0.91930000   2.16962387
  0.91930000   2.16962193
  0.91930000   2.16962008
  0.91930000   2.16961832
  0.91930000   2.16961663
  0.91930000   2.16961503
  0.91940000   2.17027284
  0.91940000   2.17026614
  0.91940000   2.17026005
  0.91940000   2.17025449
  0.91940000   2.17024938
  0.91940000   2.17024468
  0.91940000   2.17024033
  0.91940000   2.17023629
  0.91940000   2.17023254
  0.91940000   2.17022905
  0.91940000   2.17022578
  0.91940000   2.17022272
  0.91940000   2.17021984
  0.91940000   2.17021714
  0.91940000   2.17021459
  0.91940000   2.17021218
  0.91940000   2.17020990
  0.91940000   2.17020774
  0.91940000   2.17020570
  0.91940000   2.17020375
  0.91940000   2.17020190
  0.91940000   2.17020014
  0.91940000   2.17019846
  0.91940000   2.17019685
  0.91950000   2.17085285
  0.91950000   2.17084615
  0.91950000   2.17084007
  0.91950000   2.17083450
  0.91950000   2.17082939
  0.91950000   2.17082469
  0.91950000   2.17082034
  0.91950000   2.17081631
  0.91950000   2.17081255
  0.91950000   2.17080906
  0.91950000   2.17080579
  0.91950000   2.17080273
  0.91950000   2.17079985
  0.91950000   2.17079715
  0.91950000   2.17079459
  0.91950000   2.17079219
  0.91950000   2.17078991
  0.91950000   2.17078775
  0.91950000   2.17078570
  0.91950000   2.17078376
  0.91950000   2.17078191
  0.91950000   2.17078014
  0.91950000   2.17077846
  0.91950000   2.17077685
  0.91960000   2.17143105
  0.91960000   2.17142435
  0.91960000   2.17141827
  0.91960000   2.17141270
  0.91960000   2.17140759
  0.91960000   2.17140289
  0.91960000   2.17139854
  0.91960000   2.17139450
  0.91960000   2.17139075
  0.91960000   2.17138726
  0.91960000   2.17138399
  0.91960000   2.17138092
  0.91960000   2.17137805
  0.91960000   2.17137534
  0.91960000   2.17137279
  0.91960000   2.17137038
  0.91960000   2.17136810
  0.91960000   2.17136594
  0.91960000   2.17136390
  0.91960000   2.17136195
  0.91960000   2.17136010
  0.91960000   2.17135833
  0.91960000   2.17135665
  0.91960000   2.17135505
  0.91970000   2.17200744
  0.91970000   2.17200075
  0.91970000   2.17199467
  0.91970000   2.17198910
  0.91970000   2.17198399
  0.91970000   2.17197929
  0.91970000   2.17197494
  0.91970000   2.17197090
  0.91970000   2.17196715
  0.91970000   2.17196366
  0.91970000   2.17196039
  0.91970000   2.17195732
  0.91970000   2.17195445
  0.91970000   2.17195174
  0.91970000   2.17194919
  0.91970000   2.17194678
  0.91970000   2.17194450
  0.91970000   2.17194234
  0.91970000   2.17194029
  0.91970000   2.17193834
  0.91970000   2.17193649
  0.91970000   2.17193473
  0.91970000   2.17193304
  0.91970000   2.17193144
  0.91980000   2.17258205
  0.91980000   2.17257536
  0.91980000   2.17256927
  0.91980000   2.17256371
  0.91980000   2.17255860
  0.91980000   2.17255390
  0.91980000   2.17254955
  0.91980000   2.17254551
  0.91980000   2.17254176
  0.91980000   2.17253826
  0.91980000   2.17253499
  0.91980000   2.17253193
  0.91980000   2.17252905
  0.91980000   2.17252634
  0.91980000   2.17252379
  0.91980000   2.17252138
  0.91980000   2.17251910
  0.91980000   2.17251694
  0.91980000   2.17251489
  0.91980000   2.17251295
  0.91980000   2.17251109
  0.91980000   2.17250933
  0.91980000   2.17250765
  0.91980000   2.17250604
  0.91990000   2.17315488
  0.91990000   2.17314819
  0.91990000   2.17314210
  0.91990000   2.17313654
  0.91990000   2.17313143
  0.91990000   2.17312672
  0.91990000   2.17312237
  0.91990000   2.17311834
  0.91990000   2.17311459
  0.91990000   2.17311109
  0.91990000   2.17310782
  0.91990000   2.17310475
  0.91990000   2.17310188
  0.91990000   2.17309917
  0.91990000   2.17309662
  0.91990000   2.17309421
  0.91990000   2.17309193
  0.91990000   2.17308976
  0.91990000   2.17308772
  0.91990000   2.17308577
  0.91990000   2.17308391
  0.91990000   2.17308215
  0.91990000   2.17308046
  0.91990000   2.17307886
  0.92000000   2.17372593
  0.92000000   2.17371924
  0.92000000   2.17371316
  0.92000000   2.17370759
  0.92000000   2.17370249
  0.92000000   2.17369778
  0.92000000   2.17369343
  0.92000000   2.17368939
  0.92000000   2.17368564
  0.92000000   2.17368214
  0.92000000   2.17367887
  0.92000000   2.17367581
  0.92000000   2.17367293
  0.92000000   2.17367022
  0.92000000   2.17366767
  0.92000000   2.17366526
  0.92000000   2.17366298
  0.92000000   2.17366081
  0.92000000   2.17365876
  0.92000000   2.17365682
  0.92000000   2.17365496
  0.92000000   2.17365320
  0.92000000   2.17365151
  0.92000000   2.17364990
  0.92010000   2.17429522
  0.92010000   2.17428853
  0.92010000   2.17428245
  0.92010000   2.17427688
  0.92010000   2.17427178
  0.92010000   2.17426707
  0.92010000   2.17426272
  0.92010000   2.17425869
  0.92010000   2.17425494
  0.92010000   2.17425144
  0.92010000   2.17424816
  0.92010000   2.17424510
  0.92010000   2.17424222
  0.92010000   2.17423951
  0.92010000   2.17423696
  0.92010000   2.17423455
  0.92010000   2.17423226
  0.92010000   2.17423010
  0.92010000   2.17422805
  0.92010000   2.17422610
  0.92010000   2.17422425
  0.92010000   2.17422248
  0.92010000   2.17422080
  0.92010000   2.17421919
  0.92020000   2.17486276
  0.92020000   2.17485607
  0.92020000   2.17484999
  0.92020000   2.17484442
  0.92020000   2.17483932
  0.92020000   2.17483461
  0.92020000   2.17483026
  0.92020000   2.17482623
  0.92020000   2.17482247
  0.92020000   2.17481897
  0.92020000   2.17481570
  0.92020000   2.17481264
  0.92020000   2.17480976
  0.92020000   2.17480705
  0.92020000   2.17480449
  0.92020000   2.17480208
  0.92020000   2.17479980
  0.92020000   2.17479764
  0.92020000   2.17479559
  0.92020000   2.17479364
  0.92020000   2.17479178
  0.92020000   2.17479002
  0.92020000   2.17478833
  0.92020000   2.17478672
  0.92030000   2.17542855
  0.92030000   2.17542187
  0.92030000   2.17541578
  0.92030000   2.17541022
  0.92030000   2.17540511
  0.92030000   2.17540041
  0.92030000   2.17539606
  0.92030000   2.17539202
  0.92030000   2.17538827
  0.92030000   2.17538477
  0.92030000   2.17538150
  0.92030000   2.17537843
  0.92030000   2.17537555
  0.92030000   2.17537284
  0.92030000   2.17537029
  0.92030000   2.17536787
  0.92030000   2.17536559
  0.92030000   2.17536343
  0.92030000   2.17536138
  0.92030000   2.17535943
  0.92030000   2.17535757
  0.92030000   2.17535580
  0.92030000   2.17535412
  0.92030000   2.17535251
  0.92040000   2.17599261
  0.92040000   2.17598593
  0.92040000   2.17597984
  0.92040000   2.17597428
  0.92040000   2.17596917
  0.92040000   2.17596447
  0.92040000   2.17596012
  0.92040000   2.17595608
  0.92040000   2.17595233
  0.92040000   2.17594883
  0.92040000   2.17594556
  0.92040000   2.17594249
  0.92040000   2.17593961
  0.92040000   2.17593690
  0.92040000   2.17593434
  0.92040000   2.17593193
  0.92040000   2.17592965
  0.92040000   2.17592748
  0.92040000   2.17592543
  0.92040000   2.17592348
  0.92040000   2.17592163
  0.92040000   2.17591986
  0.92040000   2.17591817
  0.92040000   2.17591656
  0.92050000   2.17655494
  0.92050000   2.17654826
  0.92050000   2.17654218
  0.92050000   2.17653662
  0.92050000   2.17653151
  0.92050000   2.17652680
  0.92050000   2.17652245
  0.92050000   2.17651842
  0.92050000   2.17651466
  0.92050000   2.17651116
  0.92050000   2.17650789
  0.92050000   2.17650482
  0.92050000   2.17650194
  0.92050000   2.17649923
  0.92050000   2.17649667
  0.92050000   2.17649426
  0.92050000   2.17649198
  0.92050000   2.17648981
  0.92050000   2.17648776
  0.92050000   2.17648581
  0.92050000   2.17648395
  0.92050000   2.17648219
  0.92050000   2.17648050
  0.92050000   2.17647889
  0.92060000   2.17711556
  0.92060000   2.17710888
  0.92060000   2.17710280
  0.92060000   2.17709723
  0.92060000   2.17709213
  0.92060000   2.17708742
  0.92060000   2.17708307
  0.92060000   2.17707903
  0.92060000   2.17707528
  0.92060000   2.17707178
  0.92060000   2.17706851
  0.92060000   2.17706544
  0.92060000   2.17706256
  0.92060000   2.17705985
  0.92060000   2.17705729
  0.92060000   2.17705488
  0.92060000   2.17705259
  0.92060000   2.17705043
  0.92060000   2.17704837
  0.92060000   2.17704642
  0.92060000   2.17704457
  0.92060000   2.17704280
  0.92060000   2.17704111
  0.92060000   2.17703950
  0.92070000   2.17767447
  0.92070000   2.17766779
  0.92070000   2.17766171
  0.92070000   2.17765614
  0.92070000   2.17765104
  0.92070000   2.17764633
  0.92070000   2.17764198
  0.92070000   2.17763795
  0.92070000   2.17763419
  0.92070000   2.17763069
  0.92070000   2.17762742
  0.92070000   2.17762435
  0.92070000   2.17762147
  0.92070000   2.17761875
  0.92070000   2.17761620
  0.92070000   2.17761378
  0.92070000   2.17761150
  0.92070000   2.17760933
  0.92070000   2.17760728
  0.92070000   2.17760533
  0.92070000   2.17760347
  0.92070000   2.17760170
  0.92070000   2.17760001
  0.92070000   2.17759840
  0.92080000   2.17823168
  0.92080000   2.17822500
  0.92080000   2.17821892
  0.92080000   2.17821336
  0.92080000   2.17820825
  0.92080000   2.17820354
  0.92080000   2.17819919
  0.92080000   2.17819516
  0.92080000   2.17819140
  0.92080000   2.17818790
  0.92080000   2.17818463
  0.92080000   2.17818156
  0.92080000   2.17817868
  0.92080000   2.17817596
  0.92080000   2.17817341
  0.92080000   2.17817099
  0.92080000   2.17816871
  0.92080000   2.17816654
  0.92080000   2.17816449
  0.92080000   2.17816254
  0.92080000   2.17816068
  0.92080000   2.17815891
  0.92080000   2.17815722
  0.92080000   2.17815561
  0.92090000   2.17878720
  0.92090000   2.17878052
  0.92090000   2.17877444
  0.92090000   2.17876888
  0.92090000   2.17876377
  0.92090000   2.17875907
  0.92090000   2.17875472
  0.92090000   2.17875068
  0.92090000   2.17874692
  0.92090000   2.17874342
  0.92090000   2.17874015
  0.92090000   2.17873708
  0.92090000   2.17873420
  0.92090000   2.17873148
  0.92090000   2.17872893
  0.92090000   2.17872651
  0.92090000   2.17872423
  0.92090000   2.17872206
  0.92090000   2.17872001
  0.92090000   2.17871805
  0.92090000   2.17871619
  0.92090000   2.17871442
  0.92090000   2.17871274
  0.92090000   2.17871112
  0.92100000   2.17934104
  0.92100000   2.17933436
  0.92100000   2.17932828
  0.92100000   2.17932272
  0.92100000   2.17931761
  0.92100000   2.17931291
  0.92100000   2.17930856
  0.92100000   2.17930452
  0.92100000   2.17930077
  0.92100000   2.17929726
  0.92100000   2.17929399
  0.92100000   2.17929092
  0.92100000   2.17928804
  0.92100000   2.17928532
  0.92100000   2.17928276
  0.92100000   2.17928035
  0.92100000   2.17927806
  0.92100000   2.17927590
  0.92100000   2.17927384
  0.92100000   2.17927189
  0.92100000   2.17927003
  0.92100000   2.17926826
  0.92100000   2.17926657
  0.92100000   2.17926496
  0.92110000   2.17989321
  0.92110000   2.17988653
  0.92110000   2.17988045
  0.92110000   2.17987489
  0.92110000   2.17986978
  0.92110000   2.17986508
  0.92110000   2.17986073
  0.92110000   2.17985669
  0.92110000   2.17985293
  0.92110000   2.17984943
  0.92110000   2.17984616
  0.92110000   2.17984309
  0.92110000   2.17984020
  0.92110000   2.17983749
  0.92110000   2.17983493
  0.92110000   2.17983251
  0.92110000   2.17983023
  0.92110000   2.17982806
  0.92110000   2.17982601
  0.92110000   2.17982405
  0.92110000   2.17982219
  0.92110000   2.17982042
  0.92110000   2.17981873
  0.92110000   2.17981712
  0.92120000   2.18044371
  0.92120000   2.18043703
  0.92120000   2.18043095
  0.92120000   2.18042539
  0.92120000   2.18042029
  0.92120000   2.18041558
  0.92120000   2.18041123
  0.92120000   2.18040719
  0.92120000   2.18040344
  0.92120000   2.18039994
  0.92120000   2.18039666
  0.92120000   2.18039359
  0.92120000   2.18039071
  0.92120000   2.18038799
  0.92120000   2.18038543
  0.92120000   2.18038302
  0.92120000   2.18038073
  0.92120000   2.18037856
  0.92120000   2.18037651
  0.92120000   2.18037455
  0.92120000   2.18037269
  0.92120000   2.18037092
  0.92120000   2.18036923
  0.92120000   2.18036762
  0.92130000   2.18099256
  0.92130000   2.18098588
  0.92130000   2.18097980
  0.92130000   2.18097424
  0.92130000   2.18096914
  0.92130000   2.18096443
  0.92130000   2.18096008
  0.92130000   2.18095605
  0.92130000   2.18095229
  0.92130000   2.18094879
  0.92130000   2.18094551
  0.92130000   2.18094244
  0.92130000   2.18093955
  0.92130000   2.18093684
  0.92130000   2.18093428
  0.92130000   2.18093186
  0.92130000   2.18092958
  0.92130000   2.18092741
  0.92130000   2.18092535
  0.92130000   2.18092340
  0.92130000   2.18092154
  0.92130000   2.18091977
  0.92130000   2.18091808
  0.92130000   2.18091646
  0.92140000   2.18153976
  0.92140000   2.18153308
  0.92140000   2.18152701
  0.92140000   2.18152145
  0.92140000   2.18151634
  0.92140000   2.18151164
  0.92140000   2.18150729
  0.92140000   2.18150325
  0.92140000   2.18149949
  0.92140000   2.18149599
  0.92140000   2.18149271
  0.92140000   2.18148964
  0.92140000   2.18148676
  0.92140000   2.18148404
  0.92140000   2.18148148
  0.92140000   2.18147906
  0.92140000   2.18147678
  0.92140000   2.18147461
  0.92140000   2.18147255
  0.92140000   2.18147060
  0.92140000   2.18146874
  0.92140000   2.18146697
  0.92140000   2.18146527
  0.92140000   2.18146366
  0.92150000   2.18208532
  0.92150000   2.18207865
  0.92150000   2.18207257
  0.92150000   2.18206701
  0.92150000   2.18206191
  0.92150000   2.18205720
  0.92150000   2.18205285
  0.92150000   2.18204881
  0.92150000   2.18204506
  0.92150000   2.18204155
  0.92150000   2.18203828
  0.92150000   2.18203521
  0.92150000   2.18203232
  0.92150000   2.18202961
  0.92150000   2.18202705
  0.92150000   2.18202463
  0.92150000   2.18202234
  0.92150000   2.18202017
  0.92150000   2.18201812
  0.92150000   2.18201616
  0.92150000   2.18201430
  0.92150000   2.18201253
  0.92150000   2.18201084
  0.92150000   2.18200922
  0.92160000   2.18262926
  0.92160000   2.18262258
  0.92160000   2.18261651
  0.92160000   2.18261095
  0.92160000   2.18260585
  0.92160000   2.18260114
  0.92160000   2.18259679
  0.92160000   2.18259275
  0.92160000   2.18258899
  0.92160000   2.18258549
  0.92160000   2.18258221
  0.92160000   2.18257914
  0.92160000   2.18257626
  0.92160000   2.18257354
  0.92160000   2.18257098
  0.92160000   2.18256856
  0.92160000   2.18256627
  0.92160000   2.18256411
  0.92160000   2.18256205
  0.92160000   2.18256009
  0.92160000   2.18255823
  0.92160000   2.18255646
  0.92160000   2.18255477
  0.92160000   2.18255315
  0.92170000   2.18317157
  0.92170000   2.18316490
  0.92170000   2.18315882
  0.92170000   2.18315327
  0.92170000   2.18314816
  0.92170000   2.18314346
  0.92170000   2.18313910
  0.92170000   2.18313507
  0.92170000   2.18313131
  0.92170000   2.18312781
  0.92170000   2.18312453
  0.92170000   2.18312146
  0.92170000   2.18311857
  0.92170000   2.18311585
  0.92170000   2.18311329
  0.92170000   2.18311088
  0.92170000   2.18310859
  0.92170000   2.18310642
  0.92170000   2.18310436
  0.92170000   2.18310240
  0.92170000   2.18310054
  0.92170000   2.18309877
  0.92170000   2.18309708
  0.92170000   2.18309546
  0.92180000   2.18371227
  0.92180000   2.18370560
  0.92180000   2.18369953
  0.92180000   2.18369397
  0.92180000   2.18368886
  0.92180000   2.18368416
  0.92180000   2.18367981
  0.92180000   2.18367577
  0.92180000   2.18367201
  0.92180000   2.18366851
  0.92180000   2.18366523
  0.92180000   2.18366216
  0.92180000   2.18365927
  0.92180000   2.18365656
  0.92180000   2.18365399
  0.92180000   2.18365158
  0.92180000   2.18364929
  0.92180000   2.18364712
  0.92180000   2.18364506
  0.92180000   2.18364310
  0.92180000   2.18364124
  0.92180000   2.18363947
  0.92180000   2.18363777
  0.92180000   2.18363616
  0.92190000   2.18425137
  0.92190000   2.18424469
  0.92190000   2.18423862
  0.92190000   2.18423307
  0.92190000   2.18422796
  0.92190000   2.18422326
  0.92190000   2.18421891
  0.92190000   2.18421487
  0.92190000   2.18421111
  0.92190000   2.18420761
  0.92190000   2.18420433
  0.92190000   2.18420126
  0.92190000   2.18419837
  0.92190000   2.18419565
  0.92190000   2.18419309
  0.92190000   2.18419067
  0.92190000   2.18418838
  0.92190000   2.18418621
  0.92190000   2.18418415
  0.92190000   2.18418220
  0.92190000   2.18418033
  0.92190000   2.18417856
  0.92190000   2.18417687
  0.92190000   2.18417525
  0.92200000   2.18478887
  0.92200000   2.18478219
  0.92200000   2.18477612
  0.92200000   2.18477057
  0.92200000   2.18476546
  0.92200000   2.18476076
  0.92200000   2.18475641
  0.92200000   2.18475237
  0.92200000   2.18474861
  0.92200000   2.18474511
  0.92200000   2.18474183
  0.92200000   2.18473876
  0.92200000   2.18473587
  0.92200000   2.18473315
  0.92200000   2.18473059
  0.92200000   2.18472817
  0.92200000   2.18472588
  0.92200000   2.18472371
  0.92200000   2.18472165
  0.92200000   2.18471969
  0.92200000   2.18471783
  0.92200000   2.18471606
  0.92200000   2.18471436
  0.92200000   2.18471275
  0.92210000   2.18532478
  0.92210000   2.18531811
  0.92210000   2.18531204
  0.92210000   2.18530648
  0.92210000   2.18530138
  0.92210000   2.18529667
  0.92210000   2.18529232
  0.92210000   2.18528828
  0.92210000   2.18528453
  0.92210000   2.18528102
  0.92210000   2.18527774
  0.92210000   2.18527467
  0.92210000   2.18527178
  0.92210000   2.18526906
  0.92210000   2.18526650
  0.92210000   2.18526408
  0.92210000   2.18526179
  0.92210000   2.18525962
  0.92210000   2.18525756
  0.92210000   2.18525560
  0.92210000   2.18525374
  0.92210000   2.18525197
  0.92210000   2.18525027
  0.92210000   2.18524865
  0.92220000   2.18585911
  0.92220000   2.18585244
  0.92220000   2.18584637
  0.92220000   2.18584081
  0.92220000   2.18583571
  0.92220000   2.18583101
  0.92220000   2.18582665
  0.92220000   2.18582262
  0.92220000   2.18581886
  0.92220000   2.18581535
  0.92220000   2.18581208
  0.92220000   2.18580900
  0.92220000   2.18580611
  0.92220000   2.18580340
  0.92220000   2.18580083
  0.92220000   2.18579841
  0.92220000   2.18579612
  0.92220000   2.18579395
  0.92220000   2.18579189
  0.92220000   2.18578993
  0.92220000   2.18578807
  0.92220000   2.18578629
  0.92220000   2.18578460
  0.92220000   2.18578298
  0.92230000   2.18639187
  0.92230000   2.18638520
  0.92230000   2.18637913
  0.92230000   2.18637357
  0.92230000   2.18636847
  0.92230000   2.18636377
  0.92230000   2.18635942
  0.92230000   2.18635538
  0.92230000   2.18635162
  0.92230000   2.18634811
  0.92230000   2.18634484
  0.92230000   2.18634176
  0.92230000   2.18633887
  0.92230000   2.18633616
  0.92230000   2.18633359
  0.92230000   2.18633117
  0.92230000   2.18632888
  0.92230000   2.18632671
  0.92230000   2.18632465
  0.92230000   2.18632269
  0.92230000   2.18632083
  0.92230000   2.18631905
  0.92230000   2.18631736
  0.92230000   2.18631574
  0.92240000   2.18692307
  0.92240000   2.18691639
  0.92240000   2.18691033
  0.92240000   2.18690477
  0.92240000   2.18689967
  0.92240000   2.18689497
  0.92240000   2.18689061
  0.92240000   2.18688658
  0.92240000   2.18688282
  0.92240000   2.18687931
  0.92240000   2.18687603
  0.92240000   2.18687296
  0.92240000   2.18687007
  0.92240000   2.18686735
  0.92240000   2.18686479
  0.92240000   2.18686237
  0.92240000   2.18686008
  0.92240000   2.18685790
  0.92240000   2.18685584
  0.92240000   2.18685388
  0.92240000   2.18685202
  0.92240000   2.18685024
  0.92240000   2.18684855
  0.92240000   2.18684693
  0.92250000   2.18745271
  0.92250000   2.18744603
  0.92250000   2.18743997
  0.92250000   2.18743441
  0.92250000   2.18742931
  0.92250000   2.18742461
  0.92250000   2.18742026
  0.92250000   2.18741622
  0.92250000   2.18741246
  0.92250000   2.18740895
  0.92250000   2.18740567
  0.92250000   2.18740260
  0.92250000   2.18739971
  0.92250000   2.18739699
  0.92250000   2.18739443
  0.92250000   2.18739201
  0.92250000   2.18738972
  0.92250000   2.18738754
  0.92250000   2.18738548
  0.92250000   2.18738352
  0.92250000   2.18738166
  0.92250000   2.18737988
  0.92250000   2.18737819
  0.92250000   2.18737657
  0.92260000   2.18798080
  0.92260000   2.18797412
  0.92260000   2.18796806
  0.92260000   2.18796250
  0.92260000   2.18795741
  0.92260000   2.18795270
  0.92260000   2.18794835
  0.92260000   2.18794431
  0.92260000   2.18794055
  0.92260000   2.18793705
  0.92260000   2.18793377
  0.92260000   2.18793069
  0.92260000   2.18792780
  0.92260000   2.18792508
  0.92260000   2.18792252
  0.92260000   2.18792010
  0.92260000   2.18791781
  0.92260000   2.18791563
  0.92260000   2.18791357
  0.92260000   2.18791161
  0.92260000   2.18790975
  0.92260000   2.18790797
  0.92260000   2.18790627
  0.92260000   2.18790466
  0.92270000   2.18850735
  0.92270000   2.18850067
  0.92270000   2.18849461
  0.92270000   2.18848906
  0.92270000   2.18848396
  0.92270000   2.18847925
  0.92270000   2.18847490
  0.92270000   2.18847086
  0.92270000   2.18846710
  0.92270000   2.18846360
  0.92270000   2.18846032
  0.92270000   2.18845724
  0.92270000   2.18845435
  0.92270000   2.18845164
  0.92270000   2.18844907
  0.92270000   2.18844665
  0.92270000   2.18844436
  0.92270000   2.18844218
  0.92270000   2.18844012
  0.92270000   2.18843816
  0.92270000   2.18843630
  0.92270000   2.18843452
  0.92270000   2.18843282
  0.92270000   2.18843120
  0.92280000   2.18903237
  0.92280000   2.18902569
  0.92280000   2.18901963
  0.92280000   2.18901408
  0.92280000   2.18900898
  0.92280000   2.18900427
  0.92280000   2.18899992
  0.92280000   2.18899588
  0.92280000   2.18899212
  0.92280000   2.18898862
  0.92280000   2.18898534
  0.92280000   2.18898226
  0.92280000   2.18897937
  0.92280000   2.18897665
  0.92280000   2.18897409
  0.92280000   2.18897167
  0.92280000   2.18896937
  0.92280000   2.18896720
  0.92280000   2.18896514
  0.92280000   2.18896318
  0.92280000   2.18896131
  0.92280000   2.18895953
  0.92280000   2.18895784
  0.92280000   2.18895622
  0.92290000   2.18955586
  0.92290000   2.18954918
  0.92290000   2.18954313
  0.92290000   2.18953757
  0.92290000   2.18953247
  0.92290000   2.18952777
  0.92290000   2.18952342
  0.92290000   2.18951938
  0.92290000   2.18951562
  0.92290000   2.18951211
  0.92290000   2.18950883
  0.92290000   2.18950576
  0.92290000   2.18950287
  0.92290000   2.18950015
  0.92290000   2.18949758
  0.92290000   2.18949516
  0.92290000   2.18949286
  0.92290000   2.18949069
  0.92290000   2.18948863
  0.92290000   2.18948667
  0.92290000   2.18948480
  0.92290000   2.18948302
  0.92290000   2.18948133
  0.92290000   2.18947971
  0.92300000   2.19007783
  0.92300000   2.19007116
  0.92300000   2.19006510
  0.92300000   2.19005955
  0.92300000   2.19005445
  0.92300000   2.19004974
  0.92300000   2.19004539
  0.92300000   2.19004135
  0.92300000   2.19003760
  0.92300000   2.19003409
  0.92300000   2.19003081
  0.92300000   2.19002773
  0.92300000   2.19002484
  0.92300000   2.19002212
  0.92300000   2.19001956
  0.92300000   2.19001713
  0.92300000   2.19001484
  0.92300000   2.19001267
  0.92300000   2.19001060
  0.92300000   2.19000864
  0.92300000   2.19000678
  0.92300000   2.19000500
  0.92300000   2.19000330
  0.92300000   2.19000168
  0.92310000   2.19059830
  0.92310000   2.19059162
  0.92310000   2.19058557
  0.92310000   2.19058001
  0.92310000   2.19057492
  0.92310000   2.19057021
  0.92310000   2.19056586
  0.92310000   2.19056182
  0.92310000   2.19055806
  0.92310000   2.19055456
  0.92310000   2.19055128
  0.92310000   2.19054820
  0.92310000   2.19054531
  0.92310000   2.19054259
  0.92310000   2.19054002
  0.92310000   2.19053760
  0.92310000   2.19053531
  0.92310000   2.19053313
  0.92310000   2.19053107
  0.92310000   2.19052911
  0.92310000   2.19052724
  0.92310000   2.19052546
  0.92310000   2.19052376
  0.92310000   2.19052214
  0.92320000   2.19111726
  0.92320000   2.19111059
  0.92320000   2.19110453
  0.92320000   2.19109898
  0.92320000   2.19109388
  0.92320000   2.19108918
  0.92320000   2.19108483
  0.92320000   2.19108079
  0.92320000   2.19107703
  0.92320000   2.19107352
  0.92320000   2.19107024
  0.92320000   2.19106716
  0.92320000   2.19106427
  0.92320000   2.19106155
  0.92320000   2.19105899
  0.92320000   2.19105656
  0.92320000   2.19105427
  0.92320000   2.19105209
  0.92320000   2.19105003
  0.92320000   2.19104807
  0.92320000   2.19104620
  0.92320000   2.19104442
  0.92320000   2.19104273
  0.92320000   2.19104110
  0.92330000   2.19163473
  0.92330000   2.19162806
  0.92330000   2.19162200
  0.92330000   2.19161645
  0.92330000   2.19161135
  0.92330000   2.19160665
  0.92330000   2.19160230
  0.92330000   2.19159826
  0.92330000   2.19159450
  0.92330000   2.19159099
  0.92330000   2.19158771
  0.92330000   2.19158463
  0.92330000   2.19158174
  0.92330000   2.19157902
  0.92330000   2.19157646
  0.92330000   2.19157403
  0.92330000   2.19157174
  0.92330000   2.19156956
  0.92330000   2.19156750
  0.92330000   2.19156554
  0.92330000   2.19156367
  0.92330000   2.19156189
  0.92330000   2.19156019
  0.92330000   2.19155857
  0.92340000   2.19215071
  0.92340000   2.19214404
  0.92340000   2.19213798
  0.92340000   2.19213243
  0.92340000   2.19212733
  0.92340000   2.19212263
  0.92340000   2.19211828
  0.92340000   2.19211424
  0.92340000   2.19211048
  0.92340000   2.19210697
  0.92340000   2.19210369
  0.92340000   2.19210062
  0.92340000   2.19209773
  0.92340000   2.19209500
  0.92340000   2.19209244
  0.92340000   2.19209001
  0.92340000   2.19208772
  0.92340000   2.19208554
  0.92340000   2.19208348
  0.92340000   2.19208152
  0.92340000   2.19207965
  0.92340000   2.19207787
  0.92340000   2.19207617
  0.92340000   2.19207455
  0.92350000   2.19266521
  0.92350000   2.19265854
  0.92350000   2.19265248
  0.92350000   2.19264693
  0.92350000   2.19264184
  0.92350000   2.19263713
  0.92350000   2.19263278
  0.92350000   2.19262874
  0.92350000   2.19262498
  0.92350000   2.19262148
  0.92350000   2.19261820
  0.92350000   2.19261512
  0.92350000   2.19261223
  0.92350000   2.19260951
  0.92350000   2.19260694
  0.92350000   2.19260451
  0.92350000   2.19260222
  0.92350000   2.19260004
  0.92350000   2.19259798
  0.92350000   2.19259602
  0.92350000   2.19259415
  0.92350000   2.19259237
  0.92350000   2.19259067
  0.92350000   2.19258905
  0.92360000   2.19317823
  0.92360000   2.19317157
  0.92360000   2.19316551
  0.92360000   2.19315996
  0.92360000   2.19315487
  0.92360000   2.19315016
  0.92360000   2.19314581
  0.92360000   2.19314177
  0.92360000   2.19313801
  0.92360000   2.19313451
  0.92360000   2.19313123
  0.92360000   2.19312815
  0.92360000   2.19312526
  0.92360000   2.19312254
  0.92360000   2.19311997
  0.92360000   2.19311754
  0.92360000   2.19311525
  0.92360000   2.19311307
  0.92360000   2.19311101
  0.92360000   2.19310904
  0.92360000   2.19310718
  0.92360000   2.19310540
  0.92360000   2.19310370
  0.92360000   2.19310208
  0.92370000   2.19368979
  0.92370000   2.19368313
  0.92370000   2.19367708
  0.92370000   2.19367153
  0.92370000   2.19366643
  0.92370000   2.19366173
  0.92370000   2.19365738
  0.92370000   2.19365334
  0.92370000   2.19364958
  0.92370000   2.19364607
  0.92370000   2.19364279
  0.92370000   2.19363971
  0.92370000   2.19363682
  0.92370000   2.19363410
  0.92370000   2.19363153
  0.92370000   2.19362911
  0.92370000   2.19362681
  0.92370000   2.19362463
  0.92370000   2.19362257
  0.92370000   2.19362061
  0.92370000   2.19361874
  0.92370000   2.19361696
  0.92370000   2.19361526
  0.92370000   2.19361364
  0.92380000   2.19419989
  0.92380000   2.19419324
  0.92380000   2.19418718
  0.92380000   2.19418163
  0.92380000   2.19417654
  0.92380000   2.19417184
  0.92380000   2.19416748
  0.92380000   2.19416345
  0.92380000   2.19415969
  0.92380000   2.19415618
  0.92380000   2.19415290
  0.92380000   2.19414982
  0.92380000   2.19414693
  0.92380000   2.19414421
  0.92380000   2.19414164
  0.92380000   2.19413921
  0.92380000   2.19413692
  0.92380000   2.19413474
  0.92380000   2.19413267
  0.92380000   2.19413071
  0.92380000   2.19412884
  0.92380000   2.19412706
  0.92380000   2.19412536
  0.92380000   2.19412374
  0.92390000   2.19470854
  0.92390000   2.19470189
  0.92390000   2.19469584
  0.92390000   2.19469029
  0.92390000   2.19468519
  0.92390000   2.19468049
  0.92390000   2.19467614
  0.92390000   2.19467210
  0.92390000   2.19466834
  0.92390000   2.19466483
  0.92390000   2.19466155
  0.92390000   2.19465847
  0.92390000   2.19465558
  0.92390000   2.19465286
  0.92390000   2.19465029
  0.92390000   2.19464787
  0.92390000   2.19464557
  0.92390000   2.19464339
  0.92390000   2.19464133
  0.92390000   2.19463936
  0.92390000   2.19463750
  0.92390000   2.19463571
  0.92390000   2.19463402
  0.92390000   2.19463239
  0.92400000   2.19521575
  0.92400000   2.19520910
  0.92400000   2.19520305
  0.92400000   2.19519750
  0.92400000   2.19519240
  0.92400000   2.19518770
  0.92400000   2.19518335
  0.92400000   2.19517931
  0.92400000   2.19517555
  0.92400000   2.19517205
  0.92400000   2.19516876
  0.92400000   2.19516569
  0.92400000   2.19516279
  0.92400000   2.19516007
  0.92400000   2.19515750
  0.92400000   2.19515508
  0.92400000   2.19515278
  0.92400000   2.19515060
  0.92400000   2.19514854
  0.92400000   2.19514657
  0.92400000   2.19514471
  0.92400000   2.19514292
  0.92400000   2.19514122
  0.92400000   2.19513960
  0.92410000   2.19572151
  0.92410000   2.19571488
  0.92410000   2.19570882
  0.92410000   2.19570328
  0.92410000   2.19569818
  0.92410000   2.19569348
  0.92410000   2.19568913
  0.92410000   2.19568509
  0.92410000   2.19568133
  0.92410000   2.19567782
  0.92410000   2.19567454
  0.92410000   2.19567146
  0.92410000   2.19566857
  0.92410000   2.19566585
  0.92410000   2.19566328
  0.92410000   2.19566085
  0.92410000   2.19565855
  0.92410000   2.19565638
  0.92410000   2.19565431
  0.92410000   2.19565235
  0.92410000   2.19565048
  0.92410000   2.19564870
  0.92410000   2.19564700
  0.92410000   2.19564537
  0.92420000   2.19622585
  0.92420000   2.19621923
  0.92420000   2.19621316
  0.92420000   2.19620762
  0.92420000   2.19620252
  0.92420000   2.19619783
  0.92420000   2.19619347
  0.92420000   2.19618944
  0.92420000   2.19618568
  0.92420000   2.19618217
  0.92420000   2.19617888
  0.92420000   2.19617581
  0.92420000   2.19617291
  0.92420000   2.19617019
  0.92420000   2.19616762
  0.92420000   2.19616520
  0.92420000   2.19616290
  0.92420000   2.19616072
  0.92420000   2.19615866
  0.92420000   2.19615669
  0.92420000   2.19615482
  0.92420000   2.19615304
  0.92420000   2.19615134
  0.92420000   2.19614972
  0.92430000   2.19672876
  0.92430000   2.19672215
  0.92430000   2.19671608
  0.92430000   2.19671055
  0.92430000   2.19670545
  0.92430000   2.19670075
  0.92430000   2.19669640
  0.92430000   2.19669236
  0.92430000   2.19668860
  0.92430000   2.19668509
  0.92430000   2.19668181
  0.92430000   2.19667873
  0.92430000   2.19667584
  0.92430000   2.19667311
  0.92430000   2.19667055
  0.92430000   2.19666812
  0.92430000   2.19666582
  0.92430000   2.19666364
  0.92430000   2.19666158
  0.92430000   2.19665961
  0.92430000   2.19665774
  0.92430000   2.19665596
  0.92430000   2.19665426
  0.92430000   2.19665264
  0.92440000   2.19723026
  0.92440000   2.19722366
  0.92440000   2.19721758
  0.92440000   2.19721205
  0.92440000   2.19720695
  0.92440000   2.19720226
  0.92440000   2.19719790
  0.92440000   2.19719387
  0.92440000   2.19719011
  0.92440000   2.19718660
  0.92440000   2.19718332
  0.92440000   2.19718024
  0.92440000   2.19717734
  0.92440000   2.19717462
  0.92440000   2.19717205
  0.92440000   2.19716962
  0.92440000   2.19716733
  0.92440000   2.19716515
  0.92440000   2.19716308
  0.92440000   2.19716112
  0.92440000   2.19715925
  0.92440000   2.19715747
  0.92440000   2.19715576
  0.92440000   2.19715414
  0.92450000   2.19773034
  0.92450000   2.19772376
  0.92450000   2.19771768
  0.92450000   2.19771215
  0.92450000   2.19770705
  0.92450000   2.19770235
  0.92450000   2.19769800
  0.92450000   2.19769397
  0.92450000   2.19769021
  0.92450000   2.19768670
  0.92450000   2.19768341
  0.92450000   2.19768034
  0.92450000   2.19767744
  0.92450000   2.19767472
  0.92450000   2.19767215
  0.92450000   2.19766972
  0.92450000   2.19766743
  0.92450000   2.19766525
  0.92450000   2.19766318
  0.92450000   2.19766121
  0.92450000   2.19765934
  0.92450000   2.19765756
  0.92450000   2.19765586
  0.92450000   2.19765424
  0.92460000   2.19822902
  0.92460000   2.19822246
  0.92460000   2.19821637
  0.92460000   2.19821085
  0.92460000   2.19820574
  0.92460000   2.19820105
  0.92460000   2.19819670
  0.92460000   2.19819266
  0.92460000   2.19818890
  0.92460000   2.19818539
  0.92460000   2.19818211
  0.92460000   2.19817903
  0.92460000   2.19817614
  0.92460000   2.19817342
  0.92460000   2.19817085
  0.92460000   2.19816842
  0.92460000   2.19816612
  0.92460000   2.19816394
  0.92460000   2.19816187
  0.92460000   2.19815991
  0.92460000   2.19815804
  0.92460000   2.19815626
  0.92460000   2.19815455
  0.92460000   2.19815293
  0.92470000   2.19872630
  0.92470000   2.19871977
  0.92470000   2.19871366
  0.92470000   2.19870815
  0.92470000   2.19870304
  0.92470000   2.19869835
  0.92470000   2.19869400
  0.92470000   2.19868996
  0.92470000   2.19868620
  0.92470000   2.19868270
  0.92470000   2.19867941
  0.92470000   2.19867633
  0.92470000   2.19867344
  0.92470000   2.19867072
  0.92470000   2.19866815
  0.92470000   2.19866572
  0.92470000   2.19866342
  0.92470000   2.19866124
  0.92470000   2.19865918
  0.92470000   2.19865721
  0.92470000   2.19865534
  0.92470000   2.19865355
  0.92470000   2.19865185
  0.92470000   2.19865023
  0.92480000   2.19922219
  0.92480000   2.19921569
  0.92480000   2.19920957
  0.92480000   2.19920407
  0.92480000   2.19919896
  0.92480000   2.19919427
  0.92480000   2.19918991
  0.92480000   2.19918588
  0.92480000   2.19918212
  0.92480000   2.19917861
  0.92480000   2.19917533
  0.92480000   2.19917225
  0.92480000   2.19916935
  0.92480000   2.19916663
  0.92480000   2.19916406
  0.92480000   2.19916163
  0.92480000   2.19915933
  0.92480000   2.19915715
  0.92480000   2.19915509
  0.92480000   2.19915312
  0.92480000   2.19915125
  0.92480000   2.19914947
  0.92480000   2.19914776
  0.92480000   2.19914614
  0.92490000   2.19971670
  0.92490000   2.19971023
  0.92490000   2.19970409
  0.92490000   2.19969860
  0.92490000   2.19969348
  0.92490000   2.19968880
  0.92490000   2.19968444
  0.92490000   2.19968041
  0.92490000   2.19967665
  0.92490000   2.19967314
  0.92490000   2.19966986
  0.92490000   2.19966678
  0.92490000   2.19966388
  0.92490000   2.19966116
  0.92490000   2.19965859
  0.92490000   2.19965616
  0.92490000   2.19965386
  0.92490000   2.19965168
  0.92490000   2.19964962
  0.92490000   2.19964765
  0.92490000   2.19964578
  0.92490000   2.19964400
  0.92490000   2.19964229
  0.92490000   2.19964067
  0.92500000   2.20020982
  0.92500000   2.20020340
  0.92500000   2.20019724
  0.92500000   2.20019176
  0.92500000   2.20018664
  0.92500000   2.20018196
  0.92500000   2.20017760
  0.92500000   2.20017357
  0.92500000   2.20016980
  0.92500000   2.20016630
  0.92500000   2.20016301
  0.92500000   2.20015993
  0.92500000   2.20015704
  0.92500000   2.20015432
  0.92500000   2.20015175
  0.92500000   2.20014932
  0.92500000   2.20014702
  0.92500000   2.20014484
  0.92500000   2.20014277
  0.92500000   2.20014081
  0.92500000   2.20013893
  0.92500000   2.20013715
  0.92500000   2.20013545
  0.92500000   2.20013382
  0.92510000   2.20070158
  0.92510000   2.20069520
  0.92510000   2.20068902
  0.92510000   2.20068355
  0.92510000   2.20067842
  0.92510000   2.20067375
  0.92510000   2.20066939
  0.92510000   2.20066536
  0.92510000   2.20066159
  0.92510000   2.20065809
  0.92510000   2.20065480
  0.92510000   2.20065172
  0.92510000   2.20064883
  0.92510000   2.20064610
  0.92510000   2.20064353
  0.92510000   2.20064111
  0.92510000   2.20063881
  0.92510000   2.20063663
  0.92510000   2.20063456
  0.92510000   2.20063259
  0.92510000   2.20063072
  0.92510000   2.20062894
  0.92510000   2.20062723
  0.92510000   2.20062561
  0.92520000   2.20119196
  0.92520000   2.20118565
  0.92520000   2.20117943
  0.92520000   2.20117399
  0.92520000   2.20116884
  0.92520000   2.20116417
  0.92520000   2.20115981
  0.92520000   2.20115578
  0.92520000   2.20115202
  0.92520000   2.20114851
  0.92520000   2.20114523
  0.92520000   2.20114215
  0.92520000   2.20113925
  0.92520000   2.20113653
  0.92520000   2.20113396
  0.92520000   2.20113153
  0.92520000   2.20112923
  0.92520000   2.20112705
  0.92520000   2.20112498
  0.92520000   2.20112302
  0.92520000   2.20112115
  0.92520000   2.20111936
  0.92520000   2.20111766
  0.92520000   2.20111603
  0.92530000   2.20168099
  0.92530000   2.20167474
  0.92530000   2.20166849
  0.92530000   2.20166306
  0.92530000   2.20165791
  0.92530000   2.20165325
  0.92530000   2.20164888
  0.92530000   2.20164485
  0.92530000   2.20164109
  0.92530000   2.20163758
  0.92530000   2.20163430
  0.92530000   2.20163122
  0.92530000   2.20162833
  0.92530000   2.20162560
  0.92530000   2.20162303
  0.92530000   2.20162060
  0.92530000   2.20161830
  0.92530000   2.20161612
  0.92530000   2.20161405
  0.92530000   2.20161209
  0.92530000   2.20161021
  0.92530000   2.20160843
  0.92530000   2.20160673
  0.92530000   2.20160510
  0.92540000   2.20216866
  0.92540000   2.20216249
  0.92540000   2.20215619
  0.92540000   2.20215079
  0.92540000   2.20214563
  0.92540000   2.20214097
  0.92540000   2.20213660
  0.92540000   2.20213258
  0.92540000   2.20212881
  0.92540000   2.20212531
  0.92540000   2.20212202
  0.92540000   2.20211894
  0.92540000   2.20211605
  0.92540000   2.20211332
  0.92540000   2.20211075
  0.92540000   2.20210832
  0.92540000   2.20210602
  0.92540000   2.20210384
  0.92540000   2.20210178
  0.92540000   2.20209981
  0.92540000   2.20209794
  0.92540000   2.20209615
  0.92540000   2.20209445
  0.92540000   2.20209282
  0.92550000   2.20265499
  0.92550000   2.20264889
  0.92550000   2.20264255
  0.92550000   2.20263718
  0.92550000   2.20263200
  0.92550000   2.20262736
  0.92550000   2.20262298
  0.92550000   2.20261896
  0.92550000   2.20261519
  0.92550000   2.20261169
  0.92550000   2.20260840
  0.92550000   2.20260532
  0.92550000   2.20260243
  0.92550000   2.20259970
  0.92550000   2.20259713
  0.92550000   2.20259470
  0.92550000   2.20259240
  0.92550000   2.20259022
  0.92550000   2.20258815
  0.92550000   2.20258619
  0.92550000   2.20258432
  0.92550000   2.20258253
  0.92550000   2.20258083
  0.92550000   2.20257920
  0.92560000   2.20313997
  0.92560000   2.20313397
  0.92560000   2.20312758
  0.92560000   2.20312224
  0.92560000   2.20311704
  0.92560000   2.20311240
  0.92560000   2.20310802
  0.92560000   2.20310401
  0.92560000   2.20310024
  0.92560000   2.20309673
  0.92560000   2.20309345
  0.92560000   2.20309037
  0.92560000   2.20308747
  0.92560000   2.20308475
  0.92560000   2.20308218
  0.92560000   2.20307975
  0.92560000   2.20307745
  0.92560000   2.20307527
  0.92560000   2.20307320
  0.92560000   2.20307123
  0.92560000   2.20306936
  0.92560000   2.20306757
  0.92560000   2.20306587
  0.92560000   2.20306424
  0.92570000   2.20362360
  0.92570000   2.20361772
  0.92570000   2.20361127
  0.92570000   2.20360596
  0.92570000   2.20360075
  0.92570000   2.20359612
  0.92570000   2.20359174
  0.92570000   2.20358772
  0.92570000   2.20358395
  0.92570000   2.20358045
  0.92570000   2.20357716
  0.92570000   2.20357408
  0.92570000   2.20357119
  0.92570000   2.20356846
  0.92570000   2.20356589
  0.92570000   2.20356346
  0.92570000   2.20356116
  0.92570000   2.20355898
  0.92570000   2.20355691
  0.92570000   2.20355494
  0.92570000   2.20355307
  0.92570000   2.20355129
  0.92570000   2.20354958
  0.92570000   2.20354796
  0.92580000   2.20410591
  0.92580000   2.20410016
  0.92580000   2.20409363
  0.92580000   2.20408837
  0.92580000   2.20408313
  0.92580000   2.20407852
  0.92580000   2.20407412
  0.92580000   2.20407011
  0.92580000   2.20406634
  0.92580000   2.20406284
  0.92580000   2.20405955
  0.92580000   2.20405648
  0.92580000   2.20405358
  0.92580000   2.20405086
  0.92580000   2.20404828
  0.92580000   2.20404585
  0.92580000   2.20404355
  0.92580000   2.20404137
  0.92580000   2.20403930
  0.92580000   2.20403734
  0.92580000   2.20403546
  0.92580000   2.20403368
  0.92580000   2.20403197
  0.92580000   2.20403035
  0.92590000   2.20458689
  0.92590000   2.20458128
  0.92590000   2.20457467
  0.92590000   2.20456946
  0.92590000   2.20456419
  0.92590000   2.20455960
  0.92590000   2.20455519
  0.92590000   2.20455119
  0.92590000   2.20454741
  0.92590000   2.20454392
  0.92590000   2.20454063
  0.92590000   2.20453755
  0.92590000   2.20453465
  0.92590000   2.20453193
  0.92590000   2.20452936
  0.92590000   2.20452693
  0.92590000   2.20452463
  0.92590000   2.20452245
  0.92590000   2.20452038
  0.92590000   2.20451841
  0.92590000   2.20451654
  0.92590000   2.20451475
  0.92590000   2.20451305
  0.92590000   2.20451142
  0.92600000   2.20506655
  0.92600000   2.20506110
  0.92600000   2.20505440
  0.92600000   2.20504925
  0.92600000   2.20504394
  0.92600000   2.20503937
  0.92600000   2.20503495
  0.92600000   2.20503096
  0.92600000   2.20502718
  0.92600000   2.20502368
  0.92600000   2.20502039
  0.92600000   2.20501732
  0.92600000   2.20501442
  0.92600000   2.20501169
  0.92600000   2.20500912
  0.92600000   2.20500669
  0.92600000   2.20500439
  0.92600000   2.20500221
  0.92600000   2.20500014
  0.92600000   2.20499817
  0.92600000   2.20499630
  0.92600000   2.20499451
  0.92600000   2.20499281
  0.92600000   2.20499118
  0.92610000   2.20554489
  0.92610000   2.20553963
  0.92610000   2.20553281
  0.92610000   2.20552773
  0.92610000   2.20552239
  0.92610000   2.20551784
  0.92610000   2.20551341
  0.92610000   2.20550942
  0.92610000   2.20550564
  0.92610000   2.20550214
  0.92610000   2.20549885
  0.92610000   2.20549578
  0.92610000   2.20549288
  0.92610000   2.20549016
  0.92610000   2.20548758
  0.92610000   2.20548515
  0.92610000   2.20548285
  0.92610000   2.20548067
  0.92610000   2.20547860
  0.92610000   2.20547663
  0.92610000   2.20547476
  0.92610000   2.20547297
  0.92610000   2.20547127
  0.92610000   2.20546964
  0.92620000   2.20602191
  0.92620000   2.20601687
  0.92620000   2.20600993
  0.92620000   2.20600492
  0.92620000   2.20599953
  0.92620000   2.20599501
  0.92620000   2.20599057
  0.92620000   2.20598659
  0.92620000   2.20598280
  0.92620000   2.20597931
  0.92620000   2.20597601
  0.92620000   2.20597294
  0.92620000   2.20597004
  0.92620000   2.20596732
  0.92620000   2.20596474
  0.92620000   2.20596232
  0.92620000   2.20596001
  0.92620000   2.20595783
  0.92620000   2.20595576
  0.92620000   2.20595379
  0.92620000   2.20595192
  0.92620000   2.20595013
  0.92620000   2.20594843
  0.92620000   2.20594680
  0.92630000   2.20649763
  0.92630000   2.20649282
  0.92630000   2.20648574
  0.92630000   2.20648082
  0.92630000   2.20647538
  0.92630000   2.20647089
  0.92630000   2.20646643
  0.92630000   2.20646246
  0.92630000   2.20645866
  0.92630000   2.20645518
  0.92630000   2.20645188
  0.92630000   2.20644881
  0.92630000   2.20644591
  0.92630000   2.20644319
  0.92630000   2.20644061
  0.92630000   2.20643819
  0.92630000   2.20643588
  0.92630000   2.20643370
  0.92630000   2.20643163
  0.92630000   2.20642966
  0.92630000   2.20642779
  0.92630000   2.20642600
  0.92630000   2.20642430
  0.92630000   2.20642267
  0.92640000   2.20697204
  0.92640000   2.20696750
  0.92640000   2.20696026
  0.92640000   2.20695544
  0.92640000   2.20694994
  0.92640000   2.20694549
  0.92640000   2.20694100
  0.92640000   2.20693705
  0.92640000   2.20693325
  0.92640000   2.20692976
  0.92640000   2.20692647
  0.92640000   2.20692339
  0.92640000   2.20692049
  0.92640000   2.20691777
  0.92640000   2.20691520
  0.92640000   2.20691277
  0.92640000   2.20691047
  0.92640000   2.20690829
  0.92640000   2.20690622
  0.92640000   2.20690425
  0.92640000   2.20690237
  0.92640000   2.20690059
  0.92640000   2.20689888
  0.92640000   2.20689725
  0.92650000   2.20744516
  0.92650000   2.20744092
  0.92650000   2.20743350
  0.92650000   2.20742878
  0.92650000   2.20742322
  0.92650000   2.20741881
  0.92650000   2.20741430
  0.92650000   2.20741036
  0.92650000   2.20740655
  0.92650000   2.20740307
  0.92650000   2.20739977
  0.92650000   2.20739670
  0.92650000   2.20739380
  0.92650000   2.20739108
  0.92650000   2.20738850
  0.92650000   2.20738607
  0.92650000   2.20738377
  0.92650000   2.20738159
  0.92650000   2.20737952
  0.92650000   2.20737755
  0.92650000   2.20737568
  0.92650000   2.20737389
  0.92650000   2.20737218
  0.92650000   2.20737056
  0.92660000   2.20791697
  0.92660000   2.20791307
  0.92660000   2.20790545
  0.92660000   2.20790085
  0.92660000   2.20789522
  0.92660000   2.20789085
  0.92660000   2.20788632
  0.92660000   2.20788240
  0.92660000   2.20787857
  0.92660000   2.20787510
  0.92660000   2.20787180
  0.92660000   2.20786873
  0.92660000   2.20786583
  0.92660000   2.20786311
  0.92660000   2.20786053
  0.92660000   2.20785810
  0.92660000   2.20785580
  0.92660000   2.20785362
  0.92660000   2.20785155
  0.92660000   2.20784958
  0.92660000   2.20784771
  0.92660000   2.20784592
  0.92660000   2.20784421
  0.92660000   2.20784259
  0.92670000   2.20838749
  0.92670000   2.20838397
  0.92670000   2.20837612
  0.92670000   2.20837167
  0.92670000   2.20836595
  0.92670000   2.20836163
  0.92670000   2.20835707
  0.92670000   2.20835316
  0.92670000   2.20834933
  0.92670000   2.20834587
  0.92670000   2.20834256
  0.92670000   2.20833949
  0.92670000   2.20833659
  0.92670000   2.20833387
  0.92670000   2.20833130
  0.92670000   2.20832887
  0.92670000   2.20832656
  0.92670000   2.20832438
  0.92670000   2.20832231
  0.92670000   2.20832034
  0.92670000   2.20831847
  0.92670000   2.20831668
  0.92670000   2.20831498
  0.92670000   2.20831335
  0.92680000   2.20885673
  0.92680000   2.20885363
  0.92680000   2.20884551
  0.92680000   2.20884123
  0.92680000   2.20883541
  0.92680000   2.20883116
  0.92680000   2.20882655
  0.92680000   2.20882267
  0.92680000   2.20881883
  0.92680000   2.20881537
  0.92680000   2.20881206
  0.92680000   2.20880900
  0.92680000   2.20880609
  0.92680000   2.20880337
  0.92680000   2.20880080
  0.92680000   2.20879837
  0.92680000   2.20879606
  0.92680000   2.20879388
  0.92680000   2.20879181
  0.92680000   2.20878984
  0.92680000   2.20878797
  0.92680000   2.20878618
  0.92680000   2.20878447
  0.92680000   2.20878285
  0.92690000   2.20932467
  0.92690000   2.20932205
  0.92690000   2.20931364
  0.92690000   2.20930954
  0.92690000   2.20930361
  0.92690000   2.20929943
  0.92690000   2.20929478
  0.92690000   2.20929093
  0.92690000   2.20928706
  0.92690000   2.20928362
  0.92690000   2.20928030
  0.92690000   2.20927724
  0.92690000   2.20927433
  0.92690000   2.20927162
  0.92690000   2.20926904
  0.92690000   2.20926661
  0.92690000   2.20926431
  0.92690000   2.20926213
  0.92690000   2.20926005
  0.92690000   2.20925809
  0.92690000   2.20925621
  0.92690000   2.20925442
  0.92690000   2.20925272
  0.92690000   2.20925109
  0.92700000   2.20979134
  0.92700000   2.20978925
  0.92700000   2.20978051
  0.92700000   2.20977661
  0.92700000   2.20977055
  0.92700000   2.20976645
  0.92700000   2.20976176
  0.92700000   2.20975793
  0.92700000   2.20975405
  0.92700000   2.20975062
  0.92700000   2.20974729
  0.92700000   2.20974424
  0.92700000   2.20974133
  0.92700000   2.20973861
  0.92700000   2.20973603
  0.92700000   2.20973361
  0.92700000   2.20973130
  0.92700000   2.20972912
  0.92700000   2.20972705
  0.92700000   2.20972508
  0.92700000   2.20972321
  0.92700000   2.20972142
  0.92700000   2.20971971
  0.92700000   2.20971808
  0.92710000   2.21025672
  0.92710000   2.21025522
  0.92710000   2.21024611
  0.92710000   2.21024245
  0.92710000   2.21023625
  0.92710000   2.21023223
  0.92710000   2.21022748
  0.92710000   2.21022370
  0.92710000   2.21021979
  0.92710000   2.21021637
  0.92710000   2.21021304
  0.92710000   2.21020999
  0.92710000   2.21020708
  0.92710000   2.21020436
  0.92710000   2.21020178
  0.92710000   2.21019936
  0.92710000   2.21019705
  0.92710000   2.21019487
  0.92710000   2.21019280
  0.92710000   2.21019083
  0.92710000   2.21018895
  0.92710000   2.21018717
  0.92710000   2.21018546
  0.92710000   2.21018383
  0.92720000   2.21072082
  0.92720000   2.21071998
  0.92720000   2.21071046
  0.92720000   2.21070706
  0.92720000   2.21070069
  0.92720000   2.21069678
  0.92720000   2.21069197
  0.92720000   2.21068822
  0.92720000   2.21068429
  0.92720000   2.21068089
  0.92720000   2.21067754
  0.92720000   2.21067450
  0.92720000   2.21067159
  0.92720000   2.21066887
  0.92720000   2.21066629
  0.92720000   2.21066387
  0.92720000   2.21066156
  0.92720000   2.21065938
  0.92720000   2.21065731
  0.92720000   2.21065534
  0.92720000   2.21065346
  0.92720000   2.21065168
  0.92720000   2.21064997
  0.92720000   2.21064834
  0.92730000   2.21118365
  0.92730000   2.21118354
  0.92730000   2.21117356
  0.92730000   2.21117044
  0.92730000   2.21116390
  0.92730000   2.21116010
  0.92730000   2.21115522
  0.92730000   2.21115152
  0.92730000   2.21114756
  0.92730000   2.21114418
  0.92730000   2.21114082
  0.92730000   2.21113778
  0.92730000   2.21113486
  0.92730000   2.21113215
  0.92730000   2.21112957
  0.92730000   2.21112715
  0.92730000   2.21112484
  0.92730000   2.21112266
  0.92730000   2.21112059
  0.92730000   2.21111862
  0.92730000   2.21111674
  0.92730000   2.21111496
  0.92730000   2.21111325
  0.92730000   2.21111162
  0.92740000   2.21164520
  0.92740000   2.21164590
  0.92740000   2.21163541
  0.92740000   2.21163262
  0.92740000   2.21162587
  0.92740000   2.21162220
  0.92740000   2.21161724
  0.92740000   2.21161359
  0.92740000   2.21160960
  0.92740000   2.21160624
  0.92740000   2.21160286
  0.92740000   2.21159984
  0.92740000   2.21159691
  0.92740000   2.21159421
  0.92740000   2.21159162
  0.92740000   2.21158920
  0.92740000   2.21158689
  0.92740000   2.21158471
  0.92740000   2.21158264
  0.92740000   2.21158067
  0.92740000   2.21157879
  0.92740000   2.21157701
  0.92740000   2.21157530
  0.92740000   2.21157367
  0.92750000   2.21210548
  0.92750000   2.21210707
  0.92750000   2.21209601
  0.92750000   2.21209359
  0.92750000   2.21208661
  0.92750000   2.21208309
  0.92750000   2.21207803
  0.92750000   2.21207444
  0.92750000   2.21207041
  0.92750000   2.21206707
  0.92750000   2.21206369
  0.92750000   2.21206067
  0.92750000   2.21205774
  0.92750000   2.21205504
  0.92750000   2.21205245
  0.92750000   2.21205003
  0.92750000   2.21204772
  0.92750000   2.21204554
  0.92750000   2.21204347
  0.92750000   2.21204150
  0.92750000   2.21203962
  0.92750000   2.21203784
  0.92750000   2.21203613
  0.92750000   2.21203450
  0.92760000   2.21256448
  0.92760000   2.21256707
  0.92760000   2.21255537
  0.92760000   2.21255336
  0.92760000   2.21254612
  0.92760000   2.21254277
  0.92760000   2.21253760
  0.92760000   2.21253408
  0.92760000   2.21253001
  0.92760000   2.21252670
  0.92760000   2.21252330
  0.92760000   2.21252029
  0.92760000   2.21251735
  0.92760000   2.21251465
  0.92760000   2.21251206
  0.92760000   2.21250964
  0.92760000   2.21250734
  0.92760000   2.21250516
  0.92760000   2.21250308
  0.92760000   2.21250111
  0.92760000   2.21249924
  0.92760000   2.21249745
  0.92760000   2.21249574
  0.92760000   2.21249411
  0.92770000   2.21302222
  0.92770000   2.21302590
  0.92770000   2.21301349
  0.92770000   2.21301194
  0.92770000   2.21300440
  0.92770000   2.21300125
  0.92770000   2.21299596
  0.92770000   2.21299252
  0.92770000   2.21298839
  0.92770000   2.21298511
  0.92770000   2.21298169
  0.92770000   2.21297870
  0.92770000   2.21297575
  0.92770000   2.21297306
  0.92770000   2.21297047
  0.92770000   2.21296805
  0.92770000   2.21296574
  0.92770000   2.21296356
  0.92770000   2.21296149
  0.92770000   2.21295952
  0.92770000   2.21295764
  0.92770000   2.21295585
  0.92770000   2.21295415
  0.92770000   2.21295252
  0.92780000   2.21347868
  0.92780000   2.21348357
  0.92780000   2.21347038
  0.92780000   2.21346934
  0.92780000   2.21346147
  0.92780000   2.21345853
  0.92780000   2.21345310
  0.92780000   2.21344975
  0.92780000   2.21344557
  0.92780000   2.21344233
  0.92780000   2.21343888
  0.92780000   2.21343591
  0.92780000   2.21343295
  0.92780000   2.21343026
  0.92780000   2.21342766
  0.92780000   2.21342525
  0.92780000   2.21342294
  0.92780000   2.21342076
  0.92780000   2.21341869
  0.92780000   2.21341672
  0.92780000   2.21341484
  0.92780000   2.21341305
  0.92780000   2.21341135
  0.92780000   2.21340972
  0.92790000   2.21393387
  0.92790000   2.21394009
  0.92790000   2.21392603
  0.92790000   2.21392556
  0.92790000   2.21391732
  0.92790000   2.21391462
  0.92790000   2.21390904
  0.92790000   2.21390579
  0.92790000   2.21390154
  0.92790000   2.21389835
  0.92790000   2.21389487
  0.92790000   2.21389191
  0.92790000   2.21388894
  0.92790000   2.21388626
  0.92790000   2.21388366
  0.92790000   2.21388125
  0.92790000   2.21387894
  0.92790000   2.21387676
  0.92790000   2.21387469
  0.92790000   2.21387272
  0.92790000   2.21387084
  0.92790000   2.21386905
  0.92790000   2.21386735
  0.92790000   2.21386572
  0.92800000   2.21438778
  0.92800000   2.21439548
  0.92800000   2.21438045
  0.92800000   2.21438061
  0.92800000   2.21437196
  0.92800000   2.21436953
  0.92800000   2.21436377
  0.92800000   2.21436064
  0.92800000   2.21435632
  0.92800000   2.21435317
  0.92800000   2.21434966
  0.92800000   2.21434673
  0.92800000   2.21434375
  0.92800000   2.21434107
  0.92800000   2.21433847
  0.92800000   2.21433606
  0.92800000   2.21433374
  0.92800000   2.21433157
  0.92800000   2.21432949
  0.92800000   2.21432753
  0.92800000   2.21432565
  0.92800000   2.21432386
  0.92800000   2.21432215
  0.92800000   2.21432052
  0.92810000   2.21484042
  0.92810000   2.21484973
  0.92810000   2.21483364
  0.92810000   2.21483451
  0.92810000   2.21482539
  0.92810000   2.21482327
  0.92810000   2.21481731
  0.92810000   2.21481431
  0.92810000   2.21480990
  0.92810000   2.21480681
  0.92810000   2.21480327
  0.92810000   2.21480036
  0.92810000   2.21479736
  0.92810000   2.21479470
  0.92810000   2.21479208
  0.92810000   2.21478968
  0.92810000   2.21478736
  0.92810000   2.21478519
  0.92810000   2.21478311
  0.92810000   2.21478115
  0.92810000   2.21477927
  0.92810000   2.21477748
  0.92810000   2.21477577
  0.92810000   2.21477414
  0.92820000   2.21529179
  0.92820000   2.21530287
  0.92820000   2.21528561
  0.92820000   2.21528725
  0.92820000   2.21527762
  0.92820000   2.21527584
  0.92820000   2.21526966
  0.92820000   2.21526680
  0.92820000   2.21526230
  0.92820000   2.21525927
  0.92820000   2.21525569
  0.92820000   2.21525280
  0.92820000   2.21524979
  0.92820000   2.21524714
  0.92820000   2.21524452
  0.92820000   2.21524212
  0.92820000   2.21523980
  0.92820000   2.21523763
  0.92820000   2.21523555
  0.92820000   2.21523358
  0.92820000   2.21523170
  0.92820000   2.21522992
  0.92820000   2.21522821
  0.92820000   2.21522658
  0.92830000   2.21574187
  0.92830000   2.21575490
  0.92830000   2.21573634
  0.92830000   2.21573885
  0.92830000   2.21572865
  0.92830000   2.21572725
  0.92830000   2.21572081
  0.92830000   2.21571813
  0.92830000   2.21571352
  0.92830000   2.21571056
  0.92830000   2.21570693
  0.92830000   2.21570407
  0.92830000   2.21570104
  0.92830000   2.21569840
  0.92830000   2.21569577
  0.92830000   2.21569338
  0.92830000   2.21569105
  0.92830000   2.21568889
  0.92830000   2.21568680
  0.92830000   2.21568484
  0.92830000   2.21568296
  0.92830000   2.21568117
  0.92830000   2.21567947
  0.92830000   2.21567784
  0.92840000   2.21619068
  0.92840000   2.21620584
  0.92840000   2.21618585
  0.92840000   2.21618932
  0.92840000   2.21617848
  0.92840000   2.21617750
  0.92840000   2.21617079
  0.92840000   2.21616829
  0.92840000   2.21616355
  0.92840000   2.21616068
  0.92840000   2.21615699
  0.92840000   2.21615417
  0.92840000   2.21615111
  0.92840000   2.21614850
  0.92840000   2.21614586
  0.92840000   2.21614347
  0.92840000   2.21614114
  0.92840000   2.21613898
  0.92840000   2.21613689
  0.92840000   2.21613493
  0.92840000   2.21613305
  0.92840000   2.21613126
  0.92840000   2.21612955
  0.92840000   2.21612792
  0.92850000   2.21663820
  0.92850000   2.21665569
  0.92850000   2.21663414
  0.92850000   2.21663866
  0.92850000   2.21662711
  0.92850000   2.21662661
  0.92850000   2.21661958
  0.92850000   2.21661729
  0.92850000   2.21661241
  0.92850000   2.21660964
  0.92850000   2.21660589
  0.92850000   2.21660311
  0.92850000   2.21660002
  0.92850000   2.21659742
  0.92850000   2.21659477
  0.92850000   2.21659239
  0.92850000   2.21659006
  0.92850000   2.21658790
  0.92850000   2.21658581
  0.92850000   2.21658385
  0.92850000   2.21658197
  0.92850000   2.21658018
  0.92850000   2.21657847
  0.92850000   2.21657685
  0.92860000   2.21708443
  0.92860000   2.21710447
  0.92860000   2.21708119
  0.92860000   2.21708688
  0.92860000   2.21707455
  0.92860000   2.21707458
  0.92860000   2.21706719
  0.92860000   2.21706514
  0.92860000   2.21706011
  0.92860000   2.21705744
  0.92860000   2.21705362
  0.92860000   2.21705089
  0.92860000   2.21704777
  0.92860000   2.21704519
  0.92860000   2.21704252
  0.92860000   2.21704016
  0.92860000   2.21703781
  0.92860000   2.21703566
  0.92860000   2.21703357
  0.92860000   2.21703161
  0.92860000   2.21702973
  0.92860000   2.21702794
  0.92860000   2.21702623
  0.92860000   2.21702460
  0.92870000   2.21752937
  0.92870000   2.21755220
  0.92870000   2.21752703
  0.92870000   2.21753400
  0.92870000   2.21752080
  0.92870000   2.21752142
  0.92870000   2.21751363
  0.92870000   2.21751186
  0.92870000   2.21750664
  0.92870000   2.21750409
  0.92870000   2.21750019
  0.92870000   2.21749751
  0.92870000   2.21749436
  0.92870000   2.21749181
  0.92870000   2.21748912
  0.92870000   2.21748676
  0.92870000   2.21748442
  0.92870000   2.21748226
  0.92870000   2.21748017
  0.92870000   2.21747821
  0.92870000   2.21747633
  0.92870000   2.21747455
  0.92870000   2.21747284
  0.92870000   2.21747121
  0.92880000   2.21797301
  0.92880000   2.21799888
  0.92880000   2.21797163
  0.92880000   2.21798003
  0.92880000   2.21796586
  0.92880000   2.21796714
  0.92880000   2.21795890
  0.92880000   2.21795743
  0.92880000   2.21795201
  0.92880000   2.21794960
  0.92880000   2.21794560
  0.92880000   2.21794299
  0.92880000   2.21793979
  0.92880000   2.21793727
  0.92880000   2.21793457
  0.92880000   2.21793222
  0.92880000   2.21792986
  0.92880000   2.21792772
  0.92880000   2.21792562
  0.92880000   2.21792367
  0.92880000   2.21792178
  0.92880000   2.21792000
  0.92880000   2.21791829
  0.92880000   2.21791666
  0.92890000   2.21841535
  0.92890000   2.21844453
  0.92890000   2.21841500
  0.92890000   2.21842497
  0.92890000   2.21840973
  0.92890000   2.21841174
  0.92890000   2.21840301
  0.92890000   2.21840187
  0.92890000   2.21839622
  0.92890000   2.21839397
  0.92890000   2.21838987
  0.92890000   2.21838733
  0.92890000   2.21838408
  0.92890000   2.21838159
  0.92890000   2.21837887
  0.92890000   2.21837654
  0.92890000   2.21837417
  0.92890000   2.21837203
  0.92890000   2.21836993
  0.92890000   2.21836798
  0.92890000   2.21836609
  0.92890000   2.21836431
  0.92890000   2.21836260
  0.92890000   2.21836097
  0.92900000   2.21885637
  0.92900000   2.21888917
  0.92900000   2.21885715
  0.92900000   2.21886883
  0.92900000   2.21885241
  0.92900000   2.21885523
  0.92900000   2.21884594
  0.92900000   2.21884519
  0.92900000   2.21883928
  0.92900000   2.21883720
  0.92900000   2.21883298
  0.92900000   2.21883053
  0.92900000   2.21882723
  0.92900000   2.21882477
  0.92900000   2.21882202
  0.92900000   2.21881971
  0.92900000   2.21881733
  0.92900000   2.21881520
  0.92900000   2.21881309
  0.92900000   2.21881114
  0.92900000   2.21880925
  0.92900000   2.21880748
  0.92900000   2.21880576
  0.92900000   2.21880414
  0.92910000   2.21929608
  0.92910000   2.21933280
  0.92910000   2.21929806
  0.92910000   2.21931163
  0.92910000   2.21929391
  0.92910000   2.21929763
  0.92910000   2.21928772
  0.92910000   2.21928740
  0.92910000   2.21928119
  0.92910000   2.21927932
  0.92910000   2.21927496
  0.92910000   2.21927260
  0.92910000   2.21926923
  0.92910000   2.21926682
  0.92910000   2.21926404
  0.92910000   2.21926175
  0.92910000   2.21925936
  0.92910000   2.21925723
  0.92910000   2.21925512
  0.92910000   2.21925318
  0.92910000   2.21925128
  0.92910000   2.21924951
  0.92910000   2.21924779
  0.92910000   2.21924617
  0.92920000   2.21973446
  0.92920000   2.21977545
  0.92920000   2.21973774
  0.92920000   2.21975337
  0.92920000   2.21973422
  0.92920000   2.21973893
  0.92920000   2.21972834
  0.92920000   2.21972849
  0.92920000   2.21972196
  0.92920000   2.21972031
  0.92920000   2.21971580
  0.92920000   2.21971354
  0.92920000   2.21971010
  0.92920000   2.21970774
  0.92920000   2.21970493
  0.92920000   2.21970266
  0.92920000   2.21970025
  0.92920000   2.21969814
  0.92920000   2.21969602
  0.92920000   2.21969408
  0.92920000   2.21969219
  0.92920000   2.21969041
  0.92920000   2.21968870
  0.92920000   2.21968707
  0.92930000   2.22017150
  0.92930000   2.22021713
  0.92930000   2.22017617
  0.92930000   2.22019408
  0.92930000   2.22017334
  0.92930000   2.22017916
  0.92930000   2.22016780
  0.92930000   2.22016848
  0.92930000   2.22016158
  0.92930000   2.22016019
  0.92930000   2.22015550
  0.92930000   2.22015337
  0.92930000   2.22014984
  0.92930000   2.22014754
  0.92930000   2.22014469
  0.92930000   2.22014245
  0.92930000   2.22014002
  0.92930000   2.22013792
  0.92930000   2.22013579
  0.92930000   2.22013386
  0.92930000   2.22013196
  0.92930000   2.22013019
  0.92930000   2.22012847
  0.92930000   2.22012685
  0.92940000   2.22060721
  0.92940000   2.22065785
  0.92940000   2.22061336
  0.92940000   2.22063375
  0.92940000   2.22061127
  0.92940000   2.22061831
  0.92940000   2.22060610
  0.92940000   2.22060738
  0.92940000   2.22060007
  0.92940000   2.22059896
  0.92940000   2.22059407
  0.92940000   2.22059208
  0.92940000   2.22058846
  0.92940000   2.22058623
  0.92940000   2.22058333
  0.92940000   2.22058112
  0.92940000   2.22057867
  0.92940000   2.22057659
  0.92940000   2.22057445
  0.92940000   2.22057252
  0.92940000   2.22057062
  0.92940000   2.22056885
  0.92940000   2.22056713
  0.92940000   2.22056551
  0.92950000   2.22104156
  0.92950000   2.22109764
  0.92950000   2.22104931
  0.92950000   2.22107241
  0.92950000   2.22104802
  0.92950000   2.22105641
  0.92950000   2.22104325
  0.92950000   2.22104519
  0.92950000   2.22103742
  0.92950000   2.22103664
  0.92950000   2.22103152
  0.92950000   2.22102969
  0.92950000   2.22102596
  0.92950000   2.22102380
  0.92950000   2.22102085
  0.92950000   2.22101868
  0.92950000   2.22101620
  0.92950000   2.22101414
  0.92950000   2.22101198
  0.92950000   2.22101007
  0.92950000   2.22100816
  0.92950000   2.22100639
  0.92950000   2.22100467
  0.92950000   2.22100305
  0.92960000   2.22147454
  0.92960000   2.22153651
  0.92960000   2.22148399
  0.92960000   2.22151007
  0.92960000   2.22148358
  0.92960000   2.22149345
  0.92960000   2.22147925
  0.92960000   2.22148193
  0.92960000   2.22147363
  0.92960000   2.22147322
  0.92960000   2.22146785
  0.92960000   2.22146619
  0.92960000   2.22146234
  0.92960000   2.22146027
  0.92960000   2.22145725
  0.92960000   2.22145512
  0.92960000   2.22145262
  0.92960000   2.22145058
  0.92960000   2.22144841
  0.92960000   2.22144650
  0.92960000   2.22144459
  0.92960000   2.22144283
  0.92960000   2.22144110
  0.92960000   2.22143948
  0.92970000   2.22190614
  0.92970000   2.22197448
  0.92970000   2.22191742
  0.92970000   2.22194674
  0.92970000   2.22191795
  0.92970000   2.22192945
  0.92970000   2.22191410
  0.92970000   2.22191759
  0.92970000   2.22190872
  0.92970000   2.22190871
  0.92970000   2.22190305
  0.92970000   2.22190160
  0.92970000   2.22189761
  0.92970000   2.22189564
  0.92970000   2.22189255
  0.92970000   2.22189047
  0.92970000   2.22188793
  0.92970000   2.22188591
  0.92970000   2.22188373
  0.92970000   2.22188184
  0.92970000   2.22187991
  0.92970000   2.22187816
  0.92970000   2.22187643
  0.92970000   2.22187481
  0.92980000   2.22233636
  0.92980000   2.22241158
  0.92980000   2.22234959
  0.92980000   2.22238243
  0.92980000   2.22235112
  0.92980000   2.22236442
  0.92980000   2.22234779
  0.92980000   2.22235219
  0.92980000   2.22234268
  0.92980000   2.22234313
  0.92980000   2.22233715
  0.92980000   2.22233592
  0.92980000   2.22233176
  0.92980000   2.22232991
  0.92980000   2.22232675
  0.92980000   2.22232472
  0.92980000   2.22232214
  0.92980000   2.22232015
  0.92980000   2.22231795
  0.92980000   2.22231607
  0.92980000   2.22231413
  0.92980000   2.22231239
  0.92980000   2.22231065
  0.92980000   2.22230904
  0.92990000   2.22276517
  0.92990000   2.22284781
  0.92990000   2.22278047
  0.92990000   2.22281716
  0.92990000   2.22278310
  0.92990000   2.22279837
  0.92990000   2.22278033
  0.92990000   2.22278574
  0.92990000   2.22277551
  0.92990000   2.22277647
  0.92990000   2.22277013
  0.92990000   2.22276916
  0.92990000   2.22276482
  0.92990000   2.22276309
  0.92990000   2.22275984
  0.92990000   2.22275788
  0.92990000   2.22275526
  0.92990000   2.22275330
  0.92990000   2.22275107
  0.92990000   2.22274921
  0.92990000   2.22274726
  0.92990000   2.22274552
  0.92990000   2.22274378
  0.92990000   2.22274217
  0.93000000   2.22319256
  0.93000000   2.22328320
  0.93000000   2.22321008
  0.93000000   2.22325095
  0.93000000   2.22321387
  0.93000000   2.22323132
  0.93000000   2.22321172
  0.93000000   2.22321825
  0.93000000   2.22320722
  0.93000000   2.22320875
  0.93000000   2.22320200
  0.93000000   2.22320132
  0.93000000   2.22319677
  0.93000000   2.22319520
  0.93000000   2.22319184
  0.93000000   2.22318995
  0.93000000   2.22318728
  0.93000000   2.22318536
  0.93000000   2.22318310
  0.93000000   2.22318126
  0.93000000   2.22317930
  0.93000000   2.22317757
  0.93000000   2.22317582
  0.93000000   2.22317422
  0.93010000   2.22361852
  0.93010000   2.22371778
  0.93010000   2.22363839
  0.93010000   2.22368381
  0.93010000   2.22364344
  0.93010000   2.22366327
  0.93010000   2.22364195
  0.93010000   2.22364972
  0.93010000   2.22363780
  0.93010000   2.22363997
  0.93010000   2.22363276
  0.93010000   2.22363242
  0.93010000   2.22362763
  0.93010000   2.22362622
  0.93010000   2.22362274
  0.93010000   2.22362094
  0.93010000   2.22361821
  0.93010000   2.22361633
  0.93010000   2.22361405
  0.93010000   2.22361222
  0.93010000   2.22361025
  0.93010000   2.22360853
  0.93010000   2.22360677
  0.93010000   2.22360518
  0.93020000   2.22404304
  0.93020000   2.22415156
  0.93020000   2.22406540
  0.93020000   2.22411576
  0.93020000   2.22407180
  0.93020000   2.22409424
  0.93020000   2.22407103
  0.93020000   2.22408016
  0.93020000   2.22406726
  0.93020000   2.22407014
  0.93020000   2.22406242
  0.93020000   2.22406244
  0.93020000   2.22405740
  0.93020000   2.22405618
  0.93020000   2.22405256
  0.93020000   2.22405086
  0.93020000   2.22404805
  0.93020000   2.22404623
  0.93020000   2.22404391
  0.93020000   2.22404211
  0.93020000   2.22404012
  0.93020000   2.22403841
  0.93020000   2.22403665
  0.93020000   2.22403506
  0.93030000   2.22446609
  0.93030000   2.22458457
  0.93030000   2.22449110
  0.93030000   2.22454682
  0.93030000   2.22449894
  0.93030000   2.22452423
  0.93030000   2.22449895
  0.93030000   2.22450960
  0.93030000   2.22449559
  0.93030000   2.22449927
  0.93030000   2.22449098
  0.93030000   2.22449142
  0.93030000   2.22448607
  0.93030000   2.22448507
  0.93030000   2.22448130
  0.93030000   2.22447971
  0.93030000   2.22447682
  0.93030000   2.22447505
  0.93030000   2.22447269
  0.93030000   2.22447092
  0.93030000   2.22446891
  0.93030000   2.22446722
  0.93030000   2.22446544
  0.93030000   2.22446386
  0.93040000   2.22488765
  0.93040000   2.22501683
  0.93040000   2.22491548
  0.93040000   2.22497700
  0.93040000   2.22492487
  0.93040000   2.22495328
  0.93040000   2.22492571
  0.93040000   2.22493802
  0.93040000   2.22492281
  0.93040000   2.22492737
  0.93040000   2.22491844
  0.93040000   2.22491934
  0.93040000   2.22491366
  0.93040000   2.22491290
  0.93040000   2.22490895
  0.93040000   2.22490749
  0.93040000   2.22490451
  0.93040000   2.22490281
  0.93040000   2.22490040
  0.93040000   2.22489867
  0.93040000   2.22489663
  0.93040000   2.22489495
  0.93040000   2.22489317
  0.93040000   2.22489159
  0.93050000   2.22530772
  0.93050000   2.22544837
  0.93050000   2.22533852
  0.93050000   2.22540632
  0.93050000   2.22534956
  0.93050000   2.22538138
  0.93050000   2.22535131
  0.93050000   2.22536546
  0.93050000   2.22534890
  0.93050000   2.22535445
  0.93050000   2.22534479
  0.93050000   2.22534622
  0.93050000   2.22534016
  0.93050000   2.22533968
  0.93050000   2.22533553
  0.93050000   2.22533421
  0.93050000   2.22533113
  0.93050000   2.22532950
  0.93050000   2.22532704
  0.93050000   2.22532535
  0.93050000   2.22532328
  0.93050000   2.22532163
  0.93050000   2.22531982
  0.93050000   2.22531826
  0.93060000   2.22572627
  0.93060000   2.22587920
  0.93060000   2.22576022
  0.93060000   2.22583480
  0.93060000   2.22577302
  0.93060000   2.22580855
  0.93060000   2.22577575
  0.93060000   2.22579191
  0.93060000   2.22577387
  0.93060000   2.22578051
  0.93060000   2.22577006
  0.93060000   2.22577207
  0.93060000   2.22576558
  0.93060000   2.22576541
  0.93060000   2.22576103
  0.93060000   2.22575989
  0.93060000   2.22575668
  0.93060000   2.22575514
  0.93060000   2.22575261
  0.93060000   2.22575097
  0.93060000   2.22574886
  0.93060000   2.22574724
  0.93060000   2.22574542
  0.93060000   2.22574387
  0.93070000   2.22614328
  0.93070000   2.22630936
  0.93070000   2.22618055
  0.93070000   2.22626247
  0.93070000   2.22619523
  0.93070000   2.22623482
  0.93070000   2.22619901
  0.93070000   2.22621740
  0.93070000   2.22619772
  0.93070000   2.22620556
  0.93070000   2.22619422
  0.93070000   2.22619689
  0.93070000   2.22618992
  0.93070000   2.22619010
  0.93070000   2.22618547
  0.93070000   2.22618451
  0.93070000   2.22618116
  0.93070000   2.22617973
  0.93070000   2.22617713
  0.93070000   2.22617554
  0.93070000   2.22617339
  0.93070000   2.22617180
  0.93070000   2.22616995
  0.93070000   2.22616842
  0.93080000   2.22655873
  0.93080000   2.22673888
  0.93080000   2.22659951
  0.93080000   2.22668934
  0.93080000   2.22661619
  0.93080000   2.22666019
  0.93080000   2.22662110
  0.93080000   2.22664192
  0.93080000   2.22662044
  0.93080000   2.22662962
  0.93080000   2.22661729
  0.93080000   2.22662069
  0.93080000   2.22661318
  0.93080000   2.22661376
  0.93080000   2.22660883
  0.93080000   2.22660809
  0.93080000   2.22660459
  0.93080000   2.22660327
  0.93080000   2.22660058
  0.93080000   2.22659905
  0.93080000   2.22659686
  0.93080000   2.22659530
  0.93080000   2.22659344
  0.93080000   2.22659192
  0.93090000   2.22697260
  0.93090000   2.22716777
  0.93090000   2.22701708
  0.93090000   2.22711543
  0.93090000   2.22703589
  0.93090000   2.22708468
  0.93090000   2.22704201
  0.93090000   2.22706551
  0.93090000   2.22704203
  0.93090000   2.22705269
  0.93090000   2.22703926
  0.93090000   2.22704348
  0.93090000   2.22703536
  0.93090000   2.22703639
  0.93090000   2.22703114
  0.93090000   2.22703064
  0.93090000   2.22702696
  0.93090000   2.22702577
  0.93090000   2.22702299
  0.93090000   2.22702153
  0.93090000   2.22701929
  0.93090000   2.22701776
  0.93090000   2.22701587
  0.93090000   2.22701437
  0.93100000   2.22738488
  0.93100000   2.22759607
  0.93100000   2.22743324
  0.93100000   2.22754077
  0.93100000   2.22745431
  0.93100000   2.22750831
  0.93100000   2.22746173
  0.93100000   2.22748816
  0.93100000   2.22746249
  0.93100000   2.22747479
  0.93100000   2.22746014
  0.93100000   2.22746527
  0.93100000   2.22745647
  0.93100000   2.22745801
  0.93100000   2.22745238
  0.93100000   2.22745216
  0.93100000   2.22744827
  0.93100000   2.22744723
  0.93100000   2.22744434
  0.93100000   2.22744297
  0.93100000   2.22744066
  0.93100000   2.22743918
  0.93100000   2.22743726
  0.93100000   2.22743579
  0.93110000   2.22779554
  0.93110000   2.22802381
  0.93110000   2.22784798
  0.93110000   2.22796538
  0.93110000   2.22787145
  0.93110000   2.22793109
  0.93110000   2.22788026
  0.93110000   2.22790989
  0.93110000   2.22788182
  0.93110000   2.22789593
  0.93110000   2.22787992
  0.93110000   2.22788606
  0.93110000   2.22787651
  0.93110000   2.22787861
  0.93110000   2.22787256
  0.93110000   2.22787265
  0.93110000   2.22786853
  0.93110000   2.22786767
  0.93110000   2.22786465
  0.93110000   2.22786337
  0.93110000   2.22786099
  0.93110000   2.22785957
  0.93110000   2.22785760
  0.93110000   2.22785616
  0.93120000   2.22820455
  0.93120000   2.22845101
  0.93120000   2.22826128
  0.93120000   2.22838928
  0.93120000   2.22828729
  0.93120000   2.22835305
  0.93120000   2.22829759
  0.93120000   2.22833073
  0.93120000   2.22830000
  0.93120000   2.22831611
  0.93120000   2.22829860
  0.93120000   2.22830587
  0.93120000   2.22829548
  0.93120000   2.22829821
  0.93120000   2.22829168
  0.93120000   2.22829213
  0.93120000   2.22828775
  0.93120000   2.22828708
  0.93120000   2.22828391
  0.93120000   2.22828274
  0.93120000   2.22828029
  0.93120000   2.22827892
  0.93120000   2.22827691
  0.93120000   2.22827550
  0.93130000   2.22861191
  0.93130000   2.22887769
  0.93130000   2.22867313
  0.93130000   2.22881250
  0.93130000   2.22870182
  0.93130000   2.22877421
  0.93130000   2.22871371
  0.93130000   2.22875067
  0.93130000   2.22871705
  0.93130000   2.22873535
  0.93130000   2.22871619
  0.93130000   2.22872471
  0.93130000   2.22871337
  0.93130000   2.22871681
  0.93130000   2.22870975
  0.93130000   2.22871060
  0.93130000   2.22870592
  0.93130000   2.22870548
  0.93130000   2.22870214
  0.93130000   2.22870110
  0.93130000   2.22869855
  0.93130000   2.22869725
  0.93130000   2.22869519
  0.93130000   2.22869382
  0.93140000   2.22901758
  0.93140000   2.22930390
  0.93140000   2.22908350
  0.93140000   2.22923506
  0.93140000   2.22911503
  0.93140000   2.22919458
  0.93140000   2.22912861
  0.93140000   2.22916974
  0.93140000   2.22913295
  0.93140000   2.22915366
  0.93140000   2.22913267
  0.93140000   2.22914258
  0.93140000   2.22913019
  0.93140000   2.22913443
  0.93140000   2.22912677
  0.93140000   2.22912807
  0.93140000   2.22912304
  0.93140000   2.22912286
  0.93140000   2.22911933
  0.93140000   2.22911843
  0.93140000   2.22911578
  0.93140000   2.22911456
  0.93140000   2.22911244
  0.93140000   2.22911112
  0.93150000   2.22942156
  0.93150000   2.22972965
  0.93150000   2.22949238
  0.93150000   2.22965698
  0.93150000   2.22952691
  0.93150000   2.22961418
  0.93150000   2.22954229
  0.93150000   2.22958796
  0.93150000   2.22954770
  0.93150000   2.22957106
  0.93150000   2.22954805
  0.93150000   2.22955949
  0.93150000   2.22954594
  0.93150000   2.22955106
  0.93150000   2.22954273
  0.93150000   2.22954454
  0.93150000   2.22953913
  0.93150000   2.22953924
  0.93150000   2.22953549
  0.93150000   2.22953476
  0.93150000   2.22953198
  0.93150000   2.22953086
  0.93150000   2.22952866
  0.93150000   2.22952739
  0.93160000   2.22982381
  0.93160000   2.23015498
  0.93160000   2.22989976
  0.93160000   2.23007829
  0.93160000   2.22993744
  0.93160000   2.23003304
  0.93160000   2.22995472
  0.93160000   2.23000534
  0.93160000   2.22996129
  0.93160000   2.22998755
  0.93160000   2.22996232
  0.93160000   2.22997547
  0.93160000   2.22996061
  0.93160000   2.22996673
  0.93160000   2.22995764
  0.93160000   2.22996003
  0.93160000   2.22995418
  0.93160000   2.22995462
  0.93160000   2.22995062
  0.93160000   2.22995008
  0.93160000   2.22994715
  0.93160000   2.22994614
  0.93160000   2.22994386
  0.93160000   2.22994266
  0.93170000   2.23022432
  0.93170000   2.23057991
  0.93170000   2.23030560
  0.93170000   2.23049902
  0.93170000   2.23034660
  0.93170000   2.23045118
  0.93170000   2.23036592
  0.93170000   2.23042190
  0.93170000   2.23037371
  0.93170000   2.23040316
  0.93170000   2.23037548
  0.93170000   2.23039050
  0.93170000   2.23037421
  0.93170000   2.23038143
  0.93170000   2.23037150
  0.93170000   2.23037453
  0.93170000   2.23036819
  0.93170000   2.23036901
  0.93170000   2.23036472
  0.93170000   2.23036440
  0.93170000   2.23036131
  0.93170000   2.23036042
  0.93170000   2.23035805
  0.93170000   2.23035692
  0.93180000   2.23062307
  0.93180000   2.23100447
  0.93180000   2.23070990
  0.93180000   2.23091919
  0.93180000   2.23075438
  0.93180000   2.23086861
  0.93180000   2.23077585
  0.93180000   2.23083765
  0.93180000   2.23078496
  0.93180000   2.23081790
  0.93180000   2.23078752
  0.93180000   2.23080462
  0.93180000   2.23078674
  0.93180000   2.23079518
  0.93180000   2.23078431
  0.93180000   2.23078806
  0.93180000   2.23078117
  0.93180000   2.23078241
  0.93180000   2.23077780
  0.93180000   2.23077773
  0.93180000   2.23077444
  0.93180000   2.23077371
  0.93180000   2.23077122
  0.93180000   2.23077017
  0.93190000   2.23102005
  0.93190000   2.23142869
  0.93190000   2.23111264
  0.93190000   2.23133883
  0.93190000   2.23116077
  0.93190000   2.23128537
  0.93190000   2.23118451
  0.93190000   2.23125262
  0.93190000   2.23119502
  0.93190000   2.23123177
  0.93190000   2.23119845
  0.93190000   2.23121783
  0.93190000   2.23119818
  0.93190000   2.23120799
  0.93190000   2.23119607
  0.93190000   2.23120063
  0.93190000   2.23119312
  0.93190000   2.23119484
  0.93190000   2.23118986
  0.93190000   2.23119006
  0.93190000   2.23118657
  0.93190000   2.23118599
  0.93190000   2.23118338
  0.93190000   2.23118243
  0.93200000   2.23141524
  0.93200000   2.23185259
  0.93200000   2.23151380
  0.93200000   2.23175796
  0.93200000   2.23156574
  0.93200000   2.23170147
  0.93200000   2.23159189
  0.93200000   2.23166683
  0.93200000   2.23160390
  0.93200000   2.23164480
  0.93200000   2.23160825
  0.93200000   2.23163014
  0.93200000   2.23160854
  0.93200000   2.23161986
  0.93200000   2.23160677
  0.93200000   2.23161224
  0.93200000   2.23160403
  0.93200000   2.23160629
  0.93200000   2.23160089
  0.93200000   2.23160142
  0.93200000   2.23159768
  0.93200000   2.23159729
  0.93200000   2.23159454
  0.93200000   2.23159370
  0.93210000   2.23180862
  0.93210000   2.23227619
  0.93210000   2.23191336
  0.93210000   2.23217660
  0.93210000   2.23196929
  0.93210000   2.23211694
  0.93210000   2.23199798
  0.93210000   2.23208029
  0.93210000   2.23201158
  0.93210000   2.23205701
  0.93210000   2.23201692
  0.93210000   2.23204157
  0.93210000   2.23201782
  0.93210000   2.23203082
  0.93210000   2.23201643
  0.93210000   2.23202290
  0.93210000   2.23201391
  0.93210000   2.23201677
  0.93210000   2.23201091
  0.93210000   2.23201180
  0.93210000   2.23200778
  0.93210000   2.23200761
  0.93210000   2.23200469
  0.93210000   2.23200398
  0.93220000   2.23220020
  0.93220000   2.23269952
  0.93220000   2.23231131
  0.93220000   2.23259479
  0.93220000   2.23237140
  0.93220000   2.23253179
  0.93220000   2.23240276
  0.93220000   2.23249302
  0.93220000   2.23241805
  0.93220000   2.23246840
  0.93220000   2.23242445
  0.93220000   2.23245213
  0.93220000   2.23242601
  0.93220000   2.23244086
  0.93220000   2.23242503
  0.93220000   2.23243263
  0.93220000   2.23242276
  0.93220000   2.23242631
  0.93220000   2.23241991
  0.93220000   2.23242122
  0.93220000   2.23241687
  0.93220000   2.23241695
  0.93220000   2.23241384
  0.93220000   2.23241328
  0.93230000   2.23258996
  0.93230000   2.23312259
  0.93230000   2.23270764
  0.93230000   2.23301254
  0.93230000   2.23277206
  0.93230000   2.23294606
  0.93230000   2.23280622
  0.93230000   2.23290505
  0.93230000   2.23282330
  0.93230000   2.23287900
  0.93230000   2.23283084
  0.93230000   2.23286184
  0.93230000   2.23283311
  0.93230000   2.23285000
  0.93230000   2.23283257
  0.93230000   2.23284143
  0.93230000   2.23283057
  0.93230000   2.23283489
  0.93230000   2.23282789
  0.93230000   2.23282967
  0.93230000   2.23282496
  0.93230000   2.23282532
  0.93230000   2.23282199
  0.93230000   2.23282160
  0.93240000   2.23297789
  0.93240000   2.23354543
  0.93240000   2.23310233
  0.93240000   2.23342987
  0.93240000   2.23317124
  0.93240000   2.23335976
  0.93240000   2.23320835
  0.93240000   2.23331639
  0.93240000   2.23322733
  0.93240000   2.23328883
  0.93240000   2.23323607
  0.93240000   2.23327070
  0.93240000   2.23323911
  0.93240000   2.23325826
  0.93240000   2.23323905
  0.93240000   2.23324931
  0.93240000   2.23323736
  0.93240000   2.23324253
  0.93240000   2.23323486
  0.93240000   2.23323716
  0.93240000   2.23323204
  0.93240000   2.23323273
  0.93240000   2.23322914
  0.93240000   2.23322895
  0.93250000   2.23336400
  0.93250000   2.23396805
  0.93250000   2.23349537
  0.93250000   2.23384681
  0.93250000   2.23356895
  0.93250000   2.23377291
  0.93250000   2.23360913
  0.93250000   2.23372706
  0.93250000   2.23363011
  0.93250000   2.23369790
  0.93250000   2.23364015
  0.93250000   2.23367874
  0.93250000   2.23364401
  0.93250000   2.23366564
  0.93250000   2.23364447
  0.93250000   2.23365628
  0.93250000   2.23364310
  0.93250000   2.23364924
  0.93250000   2.23364082
  0.93250000   2.23364371
  0.93250000   2.23363813
  0.93250000   2.23363918
  0.93250000   2.23363531
  0.93250000   2.23363534
  0.93260000   2.23374830
  0.93260000   2.23439045
  0.93260000   2.23388676
  0.93260000   2.23426337
  0.93260000   2.23396515
  0.93260000   2.23418555
  0.93260000   2.23400855
  0.93260000   2.23413709
  0.93260000   2.23403165
  0.93260000   2.23410622
  0.93260000   2.23404305
  0.93260000   2.23408596
  0.93260000   2.23404781
  0.93260000   2.23407216
  0.93260000   2.23404883
  0.93260000   2.23406235
  0.93260000   2.23404782
  0.93260000   2.23405503
  0.93260000   2.23404576
  0.93260000   2.23404932
  0.93260000   2.23404321
  0.93260000   2.23404468
  0.93260000   2.23404048
  0.93260000   2.23404077
  0.93270000   2.23413079
  0.93270000   2.23481265
  0.93270000   2.23427649
  0.93270000   2.23467958
  0.93270000   2.23435986
  0.93270000   2.23459767
  0.93270000   2.23440660
  0.93270000   2.23454649
  0.93270000   2.23443192
  0.93270000   2.23451383
  0.93270000   2.23444479
  0.93270000   2.23449240
  0.93270000   2.23445048
  0.93270000   2.23447784
  0.93270000   2.23445211
  0.93270000   2.23446753
  0.93270000   2.23445149
  0.93270000   2.23445991
  0.93270000   2.23444969
  0.93270000   2.23445400
  0.93270000   2.23444729
  0.93270000   2.23444923
  0.93270000   2.23444466
  0.93270000   2.23444524
  0.93280000   2.23451149
  0.93280000   2.23523464
  0.93280000   2.23466457
  0.93280000   2.23509544
  0.93280000   2.23475305
  0.93280000   2.23500931
  0.93280000   2.23480327
  0.93280000   2.23495528
  0.93280000   2.23483092
  0.93280000   2.23492072
  0.93280000   2.23484533
  0.93280000   2.23489805
  0.93280000   2.23485204
  0.93280000   2.23488267
  0.93280000   2.23485433
  0.93280000   2.23487184
  0.93280000   2.23485413
  0.93280000   2.23486388
  0.93280000   2.23485260
  0.93280000   2.23485776
  0.93280000   2.23485038
  0.93280000   2.23485285
  0.93280000   2.23484786
  0.93280000   2.23484877
  0.93290000   2.23489043
  0.93290000   2.23565643
  0.93290000   2.23505098
  0.93290000   2.23551096
  0.93290000   2.23514472
  0.93290000   2.23542049
  0.93290000   2.23519855
  0.93290000   2.23536349
  0.93290000   2.23522864
  0.93290000   2.23532694
  0.93290000   2.23524468
  0.93290000   2.23530293
  0.93290000   2.23525247
  0.93290000   2.23528669
  0.93290000   2.23525546
  0.93290000   2.23527529
  0.93290000   2.23525573
  0.93290000   2.23526696
  0.93290000   2.23525449
  0.93290000   2.23526060
  0.93290000   2.23525246
  0.93290000   2.23525554
  0.93290000   2.23525006
  0.93290000   2.23525136
  0.93300000   2.23526763
  0.93300000   2.23607799
  0.93300000   2.23543575
  0.93300000   2.23592615
  0.93300000   2.23553486
  0.93300000   2.23583121
  0.93300000   2.23559243
  0.93300000   2.23577112
  0.93300000   2.23562507
  0.93300000   2.23573248
  0.93300000   2.23564283
  0.93300000   2.23570707
  0.93300000   2.23565176
  0.93300000   2.23568990
  0.93300000   2.23565552
  0.93300000   2.23567789
  0.93300000   2.23565628
  0.93300000   2.23566915
  0.93300000   2.23565537
  0.93300000   2.23566253
  0.93300000   2.23565355
  0.93300000   2.23565731
  0.93300000   2.23565129
  0.93300000   2.23565302
  0.93310000   2.23564314
  0.93310000   2.23649932
  0.93310000   2.23581890
  0.93310000   2.23634102
  0.93310000   2.23592349
  0.93310000   2.23624148
  0.93310000   2.23598491
  0.93310000   2.23617820
  0.93310000   2.23602021
  0.93310000   2.23613737
  0.93310000   2.23603977
  0.93310000   2.23611048
  0.93310000   2.23604992
  0.93310000   2.23609232
  0.93310000   2.23605448
  0.93310000   2.23607964
  0.93310000   2.23605578
  0.93310000   2.23607048
  0.93310000   2.23605522
  0.93310000   2.23606357
  0.93310000   2.23605364
  0.93310000   2.23605816
  0.93310000   2.23605153
  0.93310000   2.23605375
  0.93320000   2.23601700
  0.93320000   2.23692039
  0.93320000   2.23620043
  0.93320000   2.23675556
  0.93320000   2.23631060
  0.93320000   2.23665132
  0.93320000   2.23637597
  0.93320000   2.23658474
  0.93320000   2.23641403
  0.93320000   2.23654162
  0.93320000   2.23643549
  0.93320000   2.23651318
  0.93320000   2.23644693
  0.93320000   2.23649395
  0.93320000   2.23645236
  0.93320000   2.23648058
  0.93320000   2.23645424
  0.93320000   2.23647094
  0.93320000   2.23645406
  0.93320000   2.23646372
  0.93320000   2.23645273
  0.93320000   2.23645810
  0.93320000   2.23645078
  0.93320000   2.23645357
  0.93330000   2.23638927
  0.93330000   2.23734116
  0.93330000   2.23658037
  0.93330000   2.23716975
  0.93330000   2.23669620
  0.93330000   2.23706073
  0.93330000   2.23676563
  0.93330000   2.23699075
  0.93330000   2.23680654
  0.93330000   2.23694525
  0.93330000   2.23682999
  0.93330000   2.23691517
  0.93330000   2.23684278
  0.93330000   2.23689483
  0.93330000   2.23684913
  0.93330000   2.23688069
  0.93330000   2.23685163
  0.93330000   2.23687055
  0.93330000   2.23685187
  0.93330000   2.23686299
  0.93330000   2.23685081
  0.93330000   2.23685715
  0.93330000   2.23684905
  0.93330000   2.23685246
  0.93340000   2.23676004
  0.93340000   2.23776159
  0.93340000   2.23695878
  0.93340000   2.23758359
  0.93340000   2.23708030
  0.93340000   2.23746971
  0.93340000   2.23715388
  0.93340000   2.23739624
  0.93340000   2.23719774
  0.93340000   2.23734827
  0.93340000   2.23722325
  0.93340000   2.23731647
  0.93340000   2.23723747
  0.93340000   2.23729495
  0.93340000   2.23724480
  0.93340000   2.23728001
  0.93340000   2.23724797
  0.93340000   2.23726932
  0.93340000   2.23724866
  0.93340000   2.23726139
  0.93340000   2.23724790
  0.93340000   2.23725531
  0.93340000   2.23724634
  0.93340000   2.23725046
  0.93350000   2.23712937
  0.93350000   2.23818162
  0.93350000   2.23733568
  0.93350000   2.23799704
  0.93350000   2.23746294
  0.93350000   2.23787825
  0.93350000   2.23754073
  0.93350000   2.23780121
  0.93350000   2.23758762
  0.93350000   2.23775070
  0.93350000   2.23761527
  0.93350000   2.23771710
  0.93350000   2.23763100
  0.93350000   2.23769433
  0.93350000   2.23763936
  0.93350000   2.23767854
  0.93350000   2.23764324
  0.93350000   2.23766726
  0.93350000   2.23764441
  0.93350000   2.23765894
  0.93350000   2.23764399
  0.93350000   2.23765259
  0.93350000   2.23764265
  0.93350000   2.23764756
  0.93360000   2.23749738
  0.93360000   2.23860119
  0.93360000   2.23771114
  0.93360000   2.23841008
  0.93360000   2.23784413
  0.93360000   2.23828635
  0.93360000   2.23792619
  0.93360000   2.23820567
  0.93360000   2.23797619
  0.93360000   2.23815253
  0.93360000   2.23800606
  0.93360000   2.23811707
  0.93360000   2.23802335
  0.93360000   2.23809300
  0.93360000   2.23803281
  0.93360000   2.23807629
  0.93360000   2.23803745
  0.93360000   2.23806439
  0.93360000   2.23803914
  0.93360000   2.23805564
  0.93360000   2.23803906
  0.93360000   2.23804899
  0.93360000   2.23803797
  0.93360000   2.23804377
  0.93370000   2.23786417
  0.93370000   2.23902021
  0.93370000   2.23808523
  0.93370000   2.23882266
  0.93370000   2.23822392
  0.93370000   2.23869398
  0.93370000   2.23831028
  0.93370000   2.23860960
  0.93370000   2.23836345
  0.93370000   2.23855378
  0.93370000   2.23839561
  0.93370000   2.23851639
  0.93370000   2.23841453
  0.93370000   2.23849094
  0.93370000   2.23842515
  0.93370000   2.23847328
  0.93370000   2.23843058
  0.93370000   2.23846071
  0.93370000   2.23843283
  0.93370000   2.23845150
  0.93370000   2.23843314
  0.93370000   2.23844454
  0.93370000   2.23843230
  0.93370000   2.23843910
  0.93380000   2.23822989
  0.93380000   2.23943859
  0.93380000   2.23845803
  0.93380000   2.23923472
  0.93380000   2.23860235
  0.93380000   2.23910111
  0.93380000   2.23869303
  0.93380000   2.23901302
  0.93380000   2.23874941
  0.93380000   2.23895444
  0.93380000   2.23878393
  0.93380000   2.23891506
  0.93380000   2.23880454
  0.93380000   2.23888819
  0.93380000   2.23881636
  0.93380000   2.23886951
  0.93380000   2.23882264
  0.93380000   2.23885623
  0.93380000   2.23882548
  0.93380000   2.23884653
  0.93380000   2.23882620
  0.93380000   2.23883923
  0.93380000   2.23882565
  0.93380000   2.23883355
  0.93390000   2.23859468
  0.93390000   2.23985620
  0.93390000   2.23882964
  0.93390000   2.23964620
  0.93390000   2.23897949
  0.93390000   2.23950772
  0.93390000   2.23907446
  0.93390000   2.23941589
  0.93390000   2.23913409
  0.93390000   2.23935452
  0.93390000   2.23917101
  0.93390000   2.23931309
  0.93390000   2.23919337
  0.93390000   2.23928474
  0.93390000   2.23920645
  0.93390000   2.23926500
  0.93390000   2.23921362
  0.93390000   2.23925097
  0.93390000   2.23921709
  0.93390000   2.23924075
  0.93390000   2.23921826
  0.93390000   2.23923308
  0.93390000   2.23921801
  0.93390000   2.23922715
  0.93400000   2.23895872
  0.93400000   2.24027292
  0.93400000   2.23920017
  0.93400000   2.24005701
  0.93400000   2.23935540
  0.93400000   2.23991375
  0.93400000   2.23945463
  0.93400000   2.23981819
  0.93400000   2.23951752
  0.93400000   2.23975400
  0.93400000   2.23955688
  0.93400000   2.23971048
  0.93400000   2.23958104
  0.93400000   2.23968059
  0.93400000   2.23959541
  0.93400000   2.23965976
  0.93400000   2.23960353
  0.93400000   2.23964494
  0.93400000   2.23960767
  0.93400000   2.23963415
  0.93400000   2.23960930
  0.93400000   2.23962609
  0.93400000   2.23960938
  0.93400000   2.23961988
  0.93410000   2.23932221
  0.93410000   2.24068859
  0.93410000   2.23956975
  0.93410000   2.24046705
  0.93410000   2.23973017
  0.93410000   2.24031914
  0.93410000   2.23983358
  0.93410000   2.24021989
  0.93410000   2.23989972
  0.93410000   2.24015287
  0.93410000   2.23994154
  0.93410000   2.24010722
  0.93410000   2.23996754
  0.93410000   2.24007577
  0.93410000   2.23998326
  0.93410000   2.24005378
  0.93410000   2.23999236
  0.93410000   2.24003814
  0.93410000   2.23999720
  0.93410000   2.24002676
  0.93410000   2.23999933
  0.93410000   2.24001828
  0.93410000   2.23999977
  0.93410000   2.24001177
  0.93420000   2.23968538
  0.93420000   2.24110303
  0.93420000   2.23993855
  0.93420000   2.24087621
  0.93420000   2.24010390
  0.93420000   2.24072381
  0.93420000   2.24021138
  0.93420000   2.24062095
  0.93420000   2.24028073
  0.93420000   2.24055111
  0.93420000   2.24032503
  0.93420000   2.24050331
  0.93420000   2.24035289
  0.93420000   2.24047025
  0.93420000   2.24037000
  0.93420000   2.24044709
  0.93420000   2.24038011
  0.93420000   2.24043058
  0.93420000   2.24038568
  0.93420000   2.24041857
  0.93420000   2.24038835
  0.93420000   2.24040964
  0.93420000   2.24038917
  0.93420000   2.24040282
  0.93430000   2.24004847
  0.93430000   2.24151605
  0.93430000   2.24030672
  0.93430000   2.24128435
  0.93430000   2.24047672
  0.93430000   2.24112769
  0.93430000   2.24058810
  0.93430000   2.24102132
  0.93430000   2.24066061
  0.93430000   2.24094869
  0.93430000   2.24070737
  0.93430000   2.24089874
  0.93430000   2.24073711
  0.93430000   2.24086405
  0.93430000   2.24075563
  0.93430000   2.24083966
  0.93430000   2.24076679
  0.93430000   2.24082226
  0.93430000   2.24077313
  0.93430000   2.24080960
  0.93430000   2.24077635
  0.93430000   2.24080020
  0.93430000   2.24077757
  0.93430000   2.24079304
  0.93440000   2.24041176
  0.93440000   2.24192740
  0.93440000   2.24067448
  0.93440000   2.24169131
  0.93440000   2.24084875
  0.93440000   2.24153066
  0.93440000   2.24096384
  0.93440000   2.24142091
  0.93440000   2.24103941
  0.93440000   2.24134556
  0.93440000   2.24108860
  0.93440000   2.24129347
  0.93440000   2.24112022
  0.93440000   2.24125714
  0.93440000   2.24114018
  0.93440000   2.24123152
  0.93440000   2.24115240
  0.93440000   2.24121319
  0.93440000   2.24115954
  0.93440000   2.24119985
  0.93440000   2.24116335
  0.93440000   2.24118995
  0.93440000   2.24116499
  0.93440000   2.24118243
  0.93450000   2.24077557
  0.93450000   2.24233684
  0.93450000   2.24104206
  0.93450000   2.24209690
  0.93450000   2.24122016
  0.93450000   2.24193259
  0.93450000   2.24133872
  0.93450000   2.24181966
  0.93450000   2.24141721
  0.93450000   2.24174167
  0.93450000   2.24146877
  0.93450000   2.24168748
  0.93450000   2.24150226
  0.93450000   2.24164951
  0.93450000   2.24152365
  0.93450000   2.24162264
  0.93450000   2.24153697
  0.93450000   2.24160336
  0.93450000   2.24154492
  0.93450000   2.24158933
  0.93450000   2.24154933
  0.93450000   2.24157890
  0.93450000   2.24155143
  0.93450000   2.24157100
  0.93460000   2.24114024
  0.93460000   2.24274406
  0.93460000   2.24140970
  0.93460000   2.24250092
  0.93460000   2.24159114
  0.93460000   2.24233334
  0.93460000   2.24171286
  0.93460000   2.24221745
  0.93460000   2.24179410
  0.93460000   2.24213695
  0.93460000   2.24184794
  0.93460000   2.24208072
  0.93460000   2.24188326
  0.93460000   2.24204114
  0.93460000   2.24190608
  0.93460000   2.24201301
  0.93460000   2.24192049
  0.93460000   2.24199278
  0.93460000   2.24192928
  0.93460000   2.24197802
  0.93460000   2.24193432
  0.93460000   2.24196706
  0.93460000   2.24193688
  0.93460000   2.24195876
  0.93470000   2.24150617
  0.93470000   2.24314875
  0.93470000   2.24177771
  0.93470000   2.24290312
  0.93470000   2.24196190
  0.93470000   2.24273273
  0.93470000   2.24208641
  0.93470000   2.24261417
  0.93470000   2.24217019
  0.93470000   2.24253133
  0.93470000   2.24222619
  0.93470000   2.24247314
  0.93470000   2.24226327
  0.93470000   2.24243198
  0.93470000   2.24228749
  0.93470000   2.24240261
  0.93470000   2.24230301
  0.93470000   2.24238142
  0.93470000   2.24231264
  0.93470000   2.24236593
  0.93470000   2.24231832
  0.93470000   2.24235442
  0.93470000   2.24232136
  0.93470000   2.24234570
  0.93480000   2.24187378
  0.93480000   2.24355054
  0.93480000   2.24214640
  0.93480000   2.24330322
  0.93480000   2.24233268
  0.93480000   2.24313056
  0.93480000   2.24245956
  0.93480000   2.24300967
  0.93480000   2.24254561
  0.93480000   2.24292470
  0.93480000   2.24260360
  0.93480000   2.24286467
  0.93480000   2.24264235
  0.93480000   2.24282200
  0.93480000   2.24266794
  0.93480000   2.24279142
  0.93480000   2.24268454
  0.93480000   2.24276928
  0.93480000   2.24269501
  0.93480000   2.24275305
  0.93480000   2.24270133
  0.93480000   2.24274098
  0.93480000   2.24270486
  0.93480000   2.24273184
  0.93490000   2.24224354
  0.93490000   2.24394902
  0.93490000   2.24251614
  0.93490000   2.24370093
  0.93490000   2.24270377
  0.93490000   2.24352661
  0.93490000   2.24283251
  0.93490000   2.24340378
  0.93490000   2.24292050
  0.93490000   2.24331693
  0.93490000   2.24298029
  0.93490000   2.24325524
  0.93490000   2.24302060
  0.93490000   2.24321115
  0.93490000   2.24304748
  0.93490000   2.24317940
  0.93490000   2.24306512
  0.93490000   2.24315633
  0.93490000   2.24307642
  0.93490000   2.24313937
  0.93490000   2.24308339
  0.93490000   2.24312673
  0.93490000   2.24308741
  0.93490000   2.24311715
  0.93500000   2.24261598
  0.93500000   2.24434373
  0.93500000   2.24288734
  0.93500000   2.24409588
  0.93500000   2.24307546
  0.93500000   2.24392060
  0.93500000   2.24320550
  0.93500000   2.24379631
  0.93500000   2.24329504
  0.93500000   2.24370790
  0.93500000   2.24335637
  0.93500000   2.24364472
  0.93500000   2.24339808
  0.93500000   2.24359934
  0.93500000   2.24342616
  0.93500000   2.24356650
  0.93500000   2.24344480
  0.93500000   2.24354254
  0.93500000   2.24345690
  0.93500000   2.24352486
  0.93500000   2.24346450
  0.93500000   2.24351166
  0.93500000   2.24346903
  0.93500000   2.24350165
  0.93510000   2.24299165
  0.93510000   2.24473419
  0.93510000   2.24326046
  0.93510000   2.24448769
  0.93510000   2.24344812
  0.93510000   2.24431223
  0.93510000   2.24357879
  0.93510000   2.24418704
  0.93510000   2.24366944
  0.93510000   2.24409742
  0.93510000   2.24373202
  0.93510000   2.24403301
  0.93510000   2.24377493
  0.93510000   2.24398648
  0.93510000   2.24380409
  0.93510000   2.24395265
  0.93510000   2.24382364
  0.93510000   2.24392786
  0.93510000   2.24383649
  0.93510000   2.24390950
  0.93510000   2.24384471
  0.93510000   2.24389576
  0.93510000   2.24384972
  0.93510000   2.24388532
  0.93520000   2.24337119
  0.93520000   2.24511984
  0.93520000   2.24363598
  0.93520000   2.24487592
  0.93520000   2.24382214
  0.93520000   2.24470117
  0.93520000   2.24395269
  0.93520000   2.24457568
  0.93520000   2.24404393
  0.93520000   2.24448530
  0.93520000   2.24410740
  0.93520000   2.24441996
  0.93520000   2.24415127
  0.93520000   2.24437248
  0.93520000   2.24418134
  0.93520000   2.24433779
  0.93520000   2.24420170
  0.93520000   2.24431224
  0.93520000   2.24421526
  0.93520000   2.24429325
  0.93520000   2.24422405
  0.93520000   2.24427899
  0.93520000   2.24422952
  0.93520000   2.24426814
  0.93530000   2.24375527
  0.93530000   2.24550008
  0.93530000   2.24401447
  0.93530000   2.24526009
  0.93530000   2.24419797
  0.93530000   2.24508703
  0.93530000   2.24432757
  0.93530000   2.24496196
  0.93530000   2.24441879
  0.93530000   2.24487131
  0.93530000   2.24448272
  0.93530000   2.24480538
  0.93530000   2.24452726
  0.93530000   2.24475720
  0.93530000   2.24455805
  0.93530000   2.24472180
  0.93530000   2.24457909
  0.93530000   2.24469561
  0.93530000   2.24459326
  0.93530000   2.24467606
  0.93530000   2.24460256
  0.93530000   2.24466133
  0.93530000   2.24460847
  0.93530000   2.24465008
  0.93540000   2.24414464
  0.93540000   2.24587423
  0.93540000   2.24439653
  0.93540000   2.24563964
  0.93540000   2.24457610
  0.93540000   2.24546936
  0.93540000   2.24470380
  0.93540000   2.24534551
  0.93540000   2.24479432
  0.93540000   2.24525518
  0.93540000   2.24485823
  0.93540000   2.24518907
  0.93540000   2.24490309
  0.93540000   2.24514049
  0.93540000   2.24493436
  0.93540000   2.24510458
  0.93540000   2.24495591
  0.93540000   2.24507788
  0.93540000   2.24497057
  0.93540000   2.24505787
  0.93540000   2.24498032
  0.93540000   2.24504272
  0.93540000   2.24498661
  0.93540000   2.24503113
  0.93550000   2.24454009
  0.93550000   2.24624157
  0.93550000   2.24478285
  0.93550000   2.24601397
  0.93550000   2.24495709
  0.93550000   2.24584769
  0.93550000   2.24508184
  0.93550000   2.24572596
  0.93550000   2.24517089
  0.93550000   2.24563660
  0.93550000   2.24523421
  0.93550000   2.24557080
  0.93550000   2.24527898
  0.93550000   2.24552215
  0.93550000   2.24531043
  0.93550000   2.24548599
  0.93550000   2.24533229
  0.93550000   2.24545896
  0.93550000   2.24534729
  0.93550000   2.24543859
  0.93550000   2.24535739
  0.93550000   2.24542312
  0.93550000   2.24536399
  0.93550000   2.24541123
  0.93560000   2.24494252
  0.93560000   2.24660130
  0.93560000   2.24517417
  0.93560000   2.24638242
  0.93560000   2.24534154
  0.93560000   2.24622146
  0.93560000   2.24546219
  0.93560000   2.24610284
  0.93560000   2.24554890
  0.93560000   2.24601522
  0.93560000   2.24561098
  0.93560000   2.24595028
  0.93560000   2.24565519
  0.93560000   2.24590196
  0.93560000   2.24568646
  0.93560000   2.24586585
  0.93560000   2.24570838
  0.93560000   2.24583869
  0.93560000   2.24572356
  0.93560000   2.24581813
  0.93560000   2.24573387
  0.93560000   2.24580243
  0.93560000   2.24574069
  0.93560000   2.24579033
  0.93570000   2.24535286
  0.93570000   2.24695255
  0.93570000   2.24557128
  0.93570000   2.24674425
  0.93570000   2.24573015
  0.93570000   2.24659005
  0.93570000   2.24584542
  0.93570000   2.24647567
  0.93570000   2.24592881
  0.93570000   2.24639062
  0.93570000   2.24598891
  0.93570000   2.24632718
  0.93570000   2.24603200
  0.93570000   2.24627968
  0.93570000   2.24606270
  0.93570000   2.24624396
  0.93570000   2.24608438
  0.93570000   2.24621694
  0.93570000   2.24609950
  0.93570000   2.24619637
  0.93570000   2.24610987
  0.93570000   2.24618058
  0.93570000   2.24611681
  0.93570000   2.24616836
  0.93580000   2.24577213
  0.93580000   2.24729438
  0.93580000   2.24597509
  0.93580000   2.24709866
  0.93580000   2.24612365
  0.93580000   2.24695280
  0.93580000   2.24623215
  0.93580000   2.24684388
  0.93580000   2.24631114
  0.93580000   2.24676235
  0.93580000   2.24636843
  0.93580000   2.24670113
  0.93580000   2.24640978
  0.93580000   2.24665500
  0.93580000   2.24643942
  0.93580000   2.24662008
  0.93580000   2.24646050
  0.93580000   2.24659351
  0.93580000   2.24647530
  0.93580000   2.24657315
  0.93580000   2.24648553
  0.93580000   2.24655745
  0.93580000   2.24649243
  0.93580000   2.24654523
  0.93590000   2.24620146
  0.93590000   2.24762574
  0.93590000   2.24638655
  0.93590000   2.24744474
  0.93590000   2.24652289
  0.93590000   2.24730893
  0.93590000   2.24662308
  0.93590000   2.24720683
  0.93590000   2.24669647
  0.93590000   2.24712987
  0.93590000   2.24675002
  0.93590000   2.24707170
  0.93590000   2.24678890
  0.93590000   2.24702756
  0.93590000   2.24681694
  0.93590000   2.24699393
  0.93590000   2.24683699
  0.93590000   2.24696817
  0.93590000   2.24685116
  0.93590000   2.24694831
  0.93590000   2.24686101
  0.93590000   2.24693289
  0.93590000   2.24686770
  0.93590000   2.24692082
  0.93600000   2.24664200
  0.93600000   2.24794553
  0.93600000   2.24680671
  0.93600000   2.24778153
  0.93600000   2.24692878
  0.93600000   2.24765762
  0.93600000   2.24701900
  0.93600000   2.24756381
  0.93600000   2.24708547
  0.93600000   2.24749260
  0.93600000   2.24713424
  0.93600000   2.24743839
  0.93600000   2.24716983
  0.93600000   2.24739697
  0.93600000   2.24719564
  0.93600000   2.24736518
  0.93600000   2.24721418
  0.93600000   2.24734065
  0.93600000   2.24722734
  0.93600000   2.24732162
  0.93600000   2.24723652
  0.93600000   2.24730674
  0.93600000   2.24724278
  0.93600000   2.24729502
  0.93610000   2.24709506
  0.93610000   2.24825255
  0.93610000   2.24723673
  0.93610000   2.24810795
  0.93610000   2.24734231
  0.93610000   2.24799793
  0.93610000   2.24742077
  0.93610000   2.24791402
  0.93610000   2.24747887
  0.93610000   2.24784986
  0.93610000   2.24752170
  0.93610000   2.24780064
  0.93610000   2.24755310
  0.93610000   2.24776275
  0.93610000   2.24757594
  0.93610000   2.24773344
  0.93610000   2.24759241
  0.93610000   2.24771065
  0.93610000   2.24760412
  0.93610000   2.24769283
  0.93610000   2.24761229
  0.93610000   2.24767879
  0.93610000   2.24761785
  0.93610000   2.24766764
  0.93620000   2.24756197
  0.93620000   2.24854548
  0.93620000   2.24767782
  0.93620000   2.24842285
  0.93620000   2.24776459
  0.93620000   2.24832884
  0.93620000   2.24782936
  0.93620000   2.24825659
  0.93620000   2.24787751
  0.93620000   2.24820089
  0.93620000   2.24791312
  0.93620000   2.24815781
  0.93620000   2.24793929
  0.93620000   2.24812436
  0.93620000   2.24795835
  0.93620000   2.24809826
  0.93620000   2.24797209
  0.93620000   2.24807779
  0.93620000   2.24798184
  0.93620000   2.24806163
  0.93620000   2.24798861
  0.93620000   2.24804879
  0.93620000   2.24799316
  0.93620000   2.24803849
  0.93630000   2.24804422
  0.93630000   2.24882292
  0.93630000   2.24813132
  0.93630000   2.24872496
  0.93630000   2.24819680
  0.93630000   2.24864924
  0.93630000   2.24824580
  0.93630000   2.24859052
  0.93630000   2.24828229
  0.93630000   2.24854484
  0.93630000   2.24830928
  0.93630000   2.24850917
  0.93630000   2.24832908
  0.93630000   2.24848119
  0.93630000   2.24834344
  0.93630000   2.24845913
  0.93630000   2.24835371
  0.93630000   2.24844163
  0.93630000   2.24836091
  0.93630000   2.24842767
  0.93630000   2.24836580
  0.93630000   2.24841644
  0.93630000   2.24836897
  0.93630000   2.24840733
  0.93640000   2.24854334
  0.93640000   2.24908337
  0.93640000   2.24859867
  0.93640000   2.24901290
  0.93640000   2.24864025
  0.93640000   2.24895787
  0.93640000   2.24867128
  0.93640000   2.24891473
  0.93640000   2.24869425
  0.93640000   2.24888076
  0.93640000   2.24871108
  0.93640000   2.24885390
  0.93640000   2.24872324
  0.93640000   2.24883253
  0.93640000   2.24873187
  0.93640000   2.24881544
  0.93640000   2.24873783
  0.93640000   2.24880168
  0.93640000   2.24874179
  0.93640000   2.24879051
  0.93640000   2.24874426
  0.93640000   2.24878139
  0.93640000   2.24874561
  0.93640000   2.24877385
  0.93650000   2.24906099
  0.93650000   2.24932520
  0.93650000   2.24908142
  0.93650000   2.24928519
  0.93650000   2.24909636
  0.93650000   2.24925341
  0.93650000   2.24910706
  0.93650000   2.24922801
  0.93650000   2.24911452
  0.93650000   2.24920759
  0.93650000   2.24911951
  0.93650000   2.24919106
  0.93650000   2.24912265
  0.93650000   2.24917758
  0.93650000   2.24912438
  0.93650000   2.24916651
  0.93650000   2.24912509
  0.93650000   2.24915734
  0.93650000   2.24912504
  0.93650000   2.24914968
  0.93650000   2.24912445
  0.93650000   2.24914322
  0.93650000   2.24912347
  0.93650000   2.24913772
  0.93660000   2.24959891
  0.93660000   2.24954670
  0.93660000   2.24958122
  0.93660000   2.24954021
  0.93660000   2.24956666
  0.93660000   2.24953437
  0.93660000   2.24955455
  0.93660000   2.24952904
  0.93660000   2.24954435
  0.93660000   2.24952415
  0.93660000   2.24953569
  0.93660000   2.24951963
  0.93660000   2.24952826
  0.93660000   2.24951544
  0.93660000   2.24952184
  0.93660000   2.24951155
  0.93660000   2.24951623
  0.93660000   2.24950794
  0.93660000   2.24951129
  0.93660000   2.24950457
  0.93660000   2.24950692
  0.93660000   2.24950144
  0.93660000   2.24950301
  0.93660000   2.24949852
  0.93670000   2.25015897
  0.93670000   2.24974599
  0.93670000   2.25009984
  0.93670000   2.24977623
  0.93670000   2.25005282
  0.93670000   2.24979915
  0.93670000   2.25001526
  0.93670000   2.24981636
  0.93670000   2.24998514
  0.93670000   2.24982912
  0.93670000   2.24996086
  0.93670000   2.24983842
  0.93670000   2.24994120
  0.93670000   2.24984507
  0.93670000   2.24992519
  0.93670000   2.24984966
  0.93670000   2.24991208
  0.93670000   2.24985269
  0.93670000   2.24990127
  0.93670000   2.24985453
  0.93670000   2.24989229
  0.93670000   2.24985547
  0.93670000   2.24988478
  0.93670000   2.24985574
  0.93680000   2.25074309
  0.93680000   2.24992113
  0.93680000   2.25063917
  0.93680000   2.24999137
  0.93680000   2.25055660
  0.93680000   2.25004601
  0.93680000   2.25049086
  0.93680000   2.25008836
  0.93680000   2.25043839
  0.93680000   2.25012104
  0.93680000   2.25039640
  0.93680000   2.25014615
  0.93680000   2.25036269
  0.93680000   2.25016530
  0.93680000   2.25033555
  0.93680000   2.25017982
  0.93680000   2.25031361
  0.93680000   2.25019070
  0.93680000   2.25029581
  0.93680000   2.25019877
  0.93680000   2.25028130
  0.93680000   2.25020464
  0.93680000   2.25026940
  0.93680000   2.25020882
  0.93690000   2.25135335
  0.93690000   2.25007002
  0.93690000   2.25120121
  0.93690000   2.25018364
  0.93690000   2.25107995
  0.93690000   2.25027306
  0.93690000   2.25098316
  0.93690000   2.25034330
  0.93690000   2.25090578
  0.93690000   2.25039833
  0.93690000   2.25084382
  0.93690000   2.25044134
  0.93690000   2.25079411
  0.93690000   2.25047484
  0.93690000   2.25075414
  0.93690000   2.25050085
  0.93690000   2.25072193
  0.93690000   2.25052094
  0.93690000   2.25069590
  0.93690000   2.25053638
  0.93690000   2.25067480
  0.93690000   2.25054815
  0.93690000   2.25065763
  0.93690000   2.25055706
  0.93700000   2.25199187
  0.93700000   2.25019044
  0.93700000   2.25178809
  0.93700000   2.25035088
  0.93700000   2.25162490
  0.93700000   2.25047826
  0.93700000   2.25149410
  0.93700000   2.25057925
  0.93700000   2.25138914
  0.93700000   2.25065920
  0.93700000   2.25130482
  0.93700000   2.25072238
  0.93700000   2.25123700
  0.93700000   2.25077222
  0.93700000   2.25118237
  0.93700000   2.25081145
  0.93700000   2.25113828
  0.93700000   2.25084224
  0.93700000   2.25110264
  0.93700000   2.25086633
  0.93700000   2.25107376
  0.93700000   2.25088510
  0.93700000   2.25105031
  0.93700000   2.25089966
  0.93710000   2.25266089
  0.93710000   2.25028005
  0.93710000   2.25240205
  0.93710000   2.25049081
  0.93710000   2.25219367
  0.93710000   2.25065941
  0.93710000   2.25202579
  0.93710000   2.25079414
  0.93710000   2.25189045
  0.93710000   2.25090171
  0.93710000   2.25178125
  0.93710000   2.25098749
  0.93710000   2.25169307
  0.93710000   2.25105580
  0.93710000   2.25162177
  0.93710000   2.25111013
  0.93710000   2.25156407
  0.93710000   2.25115325
  0.93710000   2.25151730
  0.93710000   2.25118742
  0.93710000   2.25147933
  0.93710000   2.25121441
  0.93710000   2.25144845
  0.93710000   2.25123568
  0.93720000   2.25336275
  0.93720000   2.25033638
  0.93720000   2.25304546
  0.93720000   2.25060098
  0.93720000   2.25278858
  0.93720000   2.25081413
  0.93720000   2.25258051
  0.93720000   2.25098571
  0.93720000   2.25241189
  0.93720000   2.25112373
  0.93720000   2.25227515
  0.93720000   2.25123467
  0.93720000   2.25216420
  0.93720000   2.25132375
  0.93720000   2.25207410
  0.93720000   2.25139521
  0.93720000   2.25200088
  0.93720000   2.25145247
  0.93720000   2.25194131
  0.93720000   2.25149828
  0.93720000   2.25189279
  0.93720000   2.25153487
  0.93720000   2.25185322
  0.93720000   2.25156404
  0.93730000   2.25409984
  0.93730000   2.25035685
  0.93730000   2.25372079
  0.93730000   2.25067881
  0.93730000   2.25341213
  0.93730000   2.25093990
  0.93730000   2.25316069
  0.93730000   2.25115151
  0.93730000   2.25295579
  0.93730000   2.25132294
  0.93730000   2.25278874
  0.93730000   2.25146174
  0.93730000   2.25265249
  0.93730000   2.25157404
  0.93730000   2.25254131
  0.93730000   2.25166483
  0.93730000   2.25245051
  0.93730000   2.25173817
  0.93730000   2.25237632
  0.93730000   2.25179736
  0.93730000   2.25231563
  0.93730000   2.25184506
  0.93730000   2.25226595
  0.93730000   2.25188346
  0.93740000   2.25487465
  0.93740000   2.25033875
  0.93740000   2.25443063
  0.93740000   2.25072156
  0.93740000   2.25406692
  0.93740000   2.25103400
  0.93740000   2.25376891
  0.93740000   2.25128891
  0.93740000   2.25352468
  0.93740000   2.25149681
  0.93740000   2.25332445
  0.93740000   2.25166630
  0.93740000   2.25316025
  0.93740000   2.25180441
  0.93740000   2.25302554
  0.93740000   2.25191688
  0.93740000   2.25291496
  0.93740000   2.25200842
  0.93740000   2.25282416
  0.93740000   2.25208287
  0.93740000   2.25274955
  0.93740000   2.25214337
  0.93740000   2.25268819
  0.93740000   2.25219248
  0.93750000   2.25568971
  0.93750000   2.25027926
  0.93750000   2.25517767
  0.93750000   2.25072635
  0.93750000   2.25475572
  0.93750000   2.25109355
  0.93750000   2.25440796
  0.93750000   2.25139507
  0.93750000   2.25412128
  0.93750000   2.25164258
  0.93750000   2.25388492
  0.93750000   2.25184572
  0.93750000   2.25368999
  0.93750000   2.25201236
  0.93750000   2.25352918
  0.93750000   2.25214902
  0.93750000   2.25339648
  0.93750000   2.25226104
  0.93750000   2.25328693
  0.93750000   2.25235281
  0.93750000   2.25319645
  0.93750000   2.25242795
  0.93750000   2.25312169
  0.93750000   2.25248942
  0.93760000   2.25654762
  0.93760000   2.25017543
  0.93760000   2.25596468
  0.93760000   2.25069013
  0.93760000   2.25548142
  0.93760000   2.25111548
  0.93760000   2.25508076
  0.93760000   2.25146693
  0.93760000   2.25474853
  0.93760000   2.25175729
  0.93760000   2.25447300
  0.93760000   2.25199711
  0.93760000   2.25424447
  0.93760000   2.25219516
  0.93760000   2.25405488
  0.93760000   2.25235866
  0.93760000   2.25389755
  0.93760000   2.25249359
  0.93760000   2.25376697
  0.93760000   2.25260490
  0.93760000   2.25365853
  0.93760000   2.25269668
  0.93760000   2.25356847
  0.93760000   2.25277232
  0.93770000   2.25745101
  0.93770000   2.25002424
  0.93770000   2.25679452
  0.93770000   2.25060975
  0.93770000   2.25624703
  0.93770000   2.25109655
  0.93770000   2.25579039
  0.93770000   2.25150126
  0.93770000   2.25540951
  0.93770000   2.25183771
  0.93770000   2.25509178
  0.93770000   2.25211736
  0.93770000   2.25482671
  0.93770000   2.25234978
  0.93770000   2.25460553
  0.93770000   2.25254290
  0.93770000   2.25442095
  0.93770000   2.25270333
  0.93770000   2.25426688
  0.93770000   2.25283657
  0.93770000   2.25413825
  0.93770000   2.25294718
  0.93770000   2.25403082
  0.93770000   2.25303898
  0.93780000   2.25840251
  0.93780000   2.24982256
  0.93780000   2.25767012
  0.93780000   2.25048189
  0.93780000   2.25705567
  0.93780000   2.25103335
  0.93780000   2.25654012
  0.93780000   2.25149460
  0.93780000   2.25610754
  0.93780000   2.25188040
  0.93780000   2.25574456
  0.93780000   2.25220307
  0.93780000   2.25543995
  0.93780000   2.25247292
  0.93780000   2.25518430
  0.93780000   2.25269857
  0.93780000   2.25496973
  0.93780000   2.25288724
  0.93780000   2.25478960
  0.93780000   2.25304494
  0.93780000   2.25463836
  0.93780000   2.25317674
  0.93780000   2.25451136
  0.93790000   2.25940478
  0.93790000   2.24956719
  0.93790000   2.25859445
  0.93790000   2.25030314
  0.93790000   2.25791056
  0.93790000   2.25092230
  0.93790000   2.25733333
  0.93790000   2.25144327
  0.93790000   2.25684612
  0.93790000   2.25188166
  0.93790000   2.25643486
  0.93790000   2.25225056
  0.93790000   2.25608771
  0.93790000   2.25256098
  0.93790000   2.25579465
  0.93790000   2.25282217
  0.93790000   2.25554725
  0.93790000   2.25304193
  0.93790000   2.25533836
  0.93790000   2.25322680
  0.93790000   2.25516197
  0.93790000   2.25338229
  0.93790000   2.25501301
  0.93800000   2.26046042
  0.93800000   2.24925488
  0.93800000   2.25957051
  0.93800000   2.25006995
  0.93800000   2.25881500
  0.93800000   2.25075967
  0.93800000   2.25817355
  0.93800000   2.25134342
  0.93800000   2.25762891
  0.93800000   2.25183757
  0.93800000   2.25716646
  0.93800000   2.25225589
  0.93800000   2.25677378
  0.93800000   2.25261004
  0.93800000   2.25644035
  0.93800000   2.25290986
  0.93800000   2.25615720
  0.93800000   2.25316368
  0.93800000   2.25591675
  0.93800000   2.25337854
  0.93800000   2.25571254
  0.93800000   2.25356040
  0.93800000   2.25553909
  0.93810000   2.26157200
  0.93810000   2.24888232
  0.93810000   2.26060129
  0.93810000   2.24977871
  0.93810000   2.25977235
  0.93810000   2.25054158
  0.93810000   2.25906440
  0.93810000   2.25119099
  0.93810000   2.25845975
  0.93810000   2.25174394
  0.93810000   2.25794331
  0.93810000   2.25221483
  0.93810000   2.25750220
  0.93810000   2.25261588
  0.93810000   2.25712543
  0.93810000   2.25295746
  0.93810000   2.25680362
  0.93810000   2.25324839
  0.93810000   2.25652873
  0.93810000   2.25349618
  0.93810000   2.25629391
  0.93810000   2.25370721
  0.93810000   2.25609331
  0.93820000   2.26274202
  0.93820000   2.24844622
  0.93820000   2.26168977
  0.93820000   2.24942573
  0.93820000   2.26078598
  0.93820000   2.25026402
  0.93820000   2.26000960
  0.93820000   2.25098173
  0.93820000   2.25934262
  0.93820000   2.25159638
  0.93820000   2.25876958
  0.93820000   2.25212288
  0.93820000   2.25827726
  0.93820000   2.25257394
  0.93820000   2.25785427
  0.93820000   2.25296040
  0.93820000   2.25749085
  0.93820000   2.25329155
  0.93820000   2.25717860
  0.93820000   2.25357530
  0.93820000   2.25691032
  0.93820000   2.25381843
  0.93820000   2.25667981
  0.93830000   2.26397285
  0.93830000   2.24794325
  0.93830000   2.26283885
  0.93830000   2.24900726
  0.93830000   2.26185928
  0.93830000   2.24992291
  0.93830000   2.26101294
  0.93830000   2.25071126
  0.93830000   2.26028162
  0.93830000   2.25139026
  0.93830000   2.25964964
  0.93830000   2.25197524
  0.93830000   2.25910348
  0.93830000   2.25247933
  0.93830000   2.25863150
  0.93830000   2.25291378
  0.93830000   2.25822360
  0.93830000   2.25328825
  0.93830000   2.25787110
  0.93830000   2.25361104
  0.93830000   2.25756645
  0.93830000   2.25388930
  0.93830000   2.25730317
  0.93840000   2.26526674
  0.93840000   2.24737016
  0.93840000   2.26405137
  0.93840000   2.24851955
  0.93840000   2.26299560
  0.93840000   2.24951405
  0.93840000   2.26207821
  0.93840000   2.25037503
  0.93840000   2.26128094
  0.93840000   2.25112075
  0.93840000   2.26058798
  0.93840000   2.25176688
  0.93840000   2.25998564
  0.93840000   2.25232687
  0.93840000   2.25946206
  0.93840000   2.25281230
  0.93840000   2.25900693
  0.93840000   2.25323316
  0.93840000   2.25861131
  0.93840000   2.25359809
  0.93840000   2.25826741
  0.93840000   2.25391454
  0.93840000   2.25796847
  0.93850000   2.26662576
  0.93850000   2.24672376
  0.93850000   2.26533000
  0.93850000   2.24795888
  0.93850000   2.26419819
  0.93850000   2.24903323
  0.93850000   2.26320921
  0.93850000   2.24996840
  0.93850000   2.26234483
  0.93850000   2.25078287
  0.93850000   2.26158923
  0.93850000   2.25149251
  0.93850000   2.26092867
  0.93850000   2.25211104
  0.93850000   2.26035114
  0.93850000   2.25265030
  0.93850000   2.25984621
  0.93850000   2.25312053
  0.93850000   2.25940474
  0.93850000   2.25353064
  0.93850000   2.25901875
  0.93850000   2.25388836
  0.93850000   2.25868126
  0.93860000   2.26805177
  0.93860000   2.24600095
  0.93860000   2.26667728
  0.93860000   2.24732155
  0.93860000   2.26547020
  0.93860000   2.24847623
  0.93860000   2.26440965
  0.93860000   2.24948667
  0.93860000   2.26347753
  0.93860000   2.25037147
  0.93860000   2.26265812
  0.93860000   2.25114664
  0.93860000   2.26193767
  0.93860000   2.25182607
  0.93860000   2.26130418
  0.93860000   2.25242176
  0.93860000   2.26074711
  0.93860000   2.25294417
  0.93860000   2.26025724
  0.93860000   2.25340241
  0.93860000   2.25982646
  0.93860000   2.25380443
  0.93860000   2.25944762
  0.93870000   2.26954640
  0.93870000   2.24519879
  0.93870000   2.26809549
  0.93870000   2.24660398
  0.93870000   2.26681460
  0.93870000   2.24783886
  0.93870000   2.26568314
  0.93870000   2.24892509
  0.93870000   2.26468324
  0.93870000   2.24988131
  0.93870000   2.26379935
  0.93870000   2.25072360
  0.93870000   2.26301785
  0.93870000   2.25146590
  0.93870000   2.26232676
  0.93870000   2.25212034
  0.93870000   2.26171559
  0.93870000   2.25269751
  0.93870000   2.26117505
  0.93870000   2.25320665
  0.93870000   2.26069696
  0.93870000   2.25365587
  0.93870000   2.26027411
  0.93880000   2.27111099
  0.93880000   2.24431453
  0.93880000   2.26958669
  0.93880000   2.24580275
  0.93880000   2.26823414
  0.93880000   2.24711702
  0.93880000   2.26703311
  0.93880000   2.24827896
  0.93880000   2.26596605
  0.93880000   2.24930713
  0.93880000   2.26501764
  0.93880000   2.25021759
  0.93880000   2.26417445
  0.93880000   2.25102430
  0.93880000   2.26342465
  0.93880000   2.25173941
  0.93880000   2.26275780
  0.93880000   2.25237357
  0.93880000   2.26216467
  0.93880000   2.25293612
  0.93880000   2.26163707
  0.93880000   2.25343527
  0.93880000   2.26116775
  0.93890000   2.27274656
  0.93890000   2.24334562
  0.93890000   2.27115261
  0.93890000   2.24491460
  0.93890000   2.26973128
  0.93890000   2.24630678
  0.93890000   2.26846277
  0.93890000   2.24754364
  0.93890000   2.26732987
  0.93890000   2.24864364
  0.93890000   2.26631757
  0.93890000   2.24962275
  0.93890000   2.26541270
  0.93890000   2.25049485
  0.93890000   2.26460362
  0.93890000   2.25127208
  0.93890000   2.26388006
  0.93890000   2.25196506
  0.93890000   2.26323288
  0.93890000   2.25258318
  0.93890000   2.26265395
  0.93890000   2.25313468
  0.93890000   2.26213605
  0.93900000   2.27445380
  0.93900000   2.24228982
  0.93900000   2.27279464
  0.93900000   2.24393653
  0.93900000   2.27130817
  0.93900000   2.24540438
  0.93900000   2.26997501
  0.93900000   2.24671465
  0.93900000   2.26877834
  0.93900000   2.24788566
  0.93900000   2.26770353
  0.93900000   2.24893321
  0.93900000   2.26673770
  0.93900000   2.24987107
  0.93900000   2.26586947
  0.93900000   2.25071128
  0.93900000   2.26508877
  0.93900000   2.25146442
  0.93900000   2.26438662
  0.93900000   2.25213980
  0.93900000   2.26375504
  0.93900000   2.25274568
  0.93900000   2.26318686
  0.93910000   2.27623301
  0.93910000   2.24114517
  0.93910000   2.27451378
  0.93910000   2.24286585
  0.93910000   2.27296654
  0.93910000   2.24440634
  0.93910000   2.27157234
  0.93910000   2.24578775
  0.93910000   2.27031480
  0.93910000   2.24702816
  0.93910000   2.26917964
  0.93910000   2.24814321
  0.93910000   2.26815434
  0.93910000   2.24914648
  0.93910000   2.26722782
  0.93910000   2.25004988
  0.93910000   2.26639027
  0.93910000   2.25086385
  0.93910000   2.26563292
  0.93910000   2.25159765
  0.93910000   2.26494795
  0.93910000   2.25225945
  0.93910000   2.26432835
  0.93920000   2.27808411
  0.93920000   2.23991008
  0.93920000   2.27631059
  0.93920000   2.24170021
  0.93920000   2.27470769
  0.93920000   2.24330954
  0.93920000   2.27325686
  0.93920000   2.24475898
  0.93920000   2.27194213
  0.93920000   2.24606638
  0.93920000   2.27074964
  0.93920000   2.24724715
  0.93920000   2.26966720
  0.93920000   2.24831469
  0.93920000   2.26868408
  0.93920000   2.24928071
  0.93920000   2.26779076
  0.93920000   2.25015550
  0.93920000   2.26697873
  0.93920000   2.25094818
  0.93920000   2.26624037
  0.93920000   2.25166682
  0.93920000   2.26556886
  0.93930000   2.28000655
  0.93930000   2.23858337
  0.93930000   2.27818517
  0.93930000   2.24043767
  0.93930000   2.27653240
  0.93930000   2.24211124
  0.93930000   2.27503012
  0.93930000   2.24362476
  0.93930000   2.27366273
  0.93930000   2.24499587
  0.93930000   2.27241677
  0.93930000   2.24623974
  0.93930000   2.27128041
  0.93930000   2.24736954
  0.93930000   2.27024328
  0.93930000   2.24839677
  0.93930000   2.26929615
  0.93930000   2.24933153
  0.93930000   2.26843081
  0.93930000   2.25018278
  0.93930000   2.26763988
  0.93930000   2.25095843
  0.93930000   2.26691676
  0.93940000   2.28199937
  0.93940000   2.23716427
  0.93940000   2.28013709
  0.93940000   2.23907676
  0.93940000   2.27844093
  0.93940000   2.24080918
  0.93940000   2.27689310
  0.93940000   2.24238200
  0.93940000   2.27547840
  0.93940000   2.24381266
  0.93940000   2.27418369
  0.93940000   2.24511608
  0.93940000   2.27299755
  0.93940000   2.24630520
  0.93940000   2.27190991
  0.93940000   2.24739131
  0.93940000   2.27091189
  0.93940000   2.24838428
  0.93940000   2.26999555
  0.93940000   2.24929288
  0.93940000   2.26915381
  0.93940000   2.25012487
  0.93940000   2.26838028
  0.93950000   2.28406115
  0.93950000   2.23565250
  0.93950000   2.28216542
  0.93950000   2.23761653
  0.93950000   2.28043292
  0.93950000   2.23940164
  0.93950000   2.27884615
  0.93950000   2.24102816
  0.93950000   2.27739023
  0.93950000   2.24251331
  0.93950000   2.27605238
  0.93950000   2.24387181
  0.93950000   2.27482148
  0.93950000   2.24511636
  0.93950000   2.27368781
  0.93950000   2.24625801
  0.93950000   2.27264278
  0.93950000   2.24730645
  0.93950000   2.27167878
  0.93950000   2.24827020
  0.93950000   2.27078898
  0.93950000   2.24915686
  0.93950000   2.26996727
  0.93960000   2.28619000
  0.93960000   2.23404827
  0.93960000   2.28426868
  0.93960000   2.23605656
  0.93960000   2.28250740
  0.93960000   2.23788751
  0.93960000   2.28088891
  0.93960000   2.23956133
  0.93960000   2.27939860
  0.93960000   2.24109506
  0.93960000   2.27802398
  0.93960000   2.24250322
  0.93960000   2.27675424
  0.93960000   2.24379832
  0.93960000   2.27557996
  0.93960000   2.24499117
  0.93960000   2.27449284
  0.93960000   2.24609126
  0.93960000   2.27348555
  0.93960000   2.24710691
  0.93960000   2.27255153
  0.93960000   2.24804550
  0.93960000   2.27168492
  0.93970000   2.28838358
  0.93970000   2.23235232
  0.93970000   2.28644483
  0.93970000   2.23439706
  0.93970000   2.28466275
  0.93970000   2.23626635
  0.93970000   2.28302028
  0.93970000   2.23798033
  0.93970000   2.28150304
  0.93970000   2.23955590
  0.93970000   2.28009878
  0.93970000   2.24100741
  0.93970000   2.27879695
  0.93970000   2.24234720
  0.93970000   2.27758839
  0.93970000   2.24358588
  0.93970000   2.27646506
  0.93970000   2.24473273
  0.93970000   2.27541989
  0.93970000   2.24579589
  0.93970000   2.27444660
  0.93970000   2.24678252
  0.93970000   2.27353955
  0.93980000   2.29063913
  0.93980000   2.23056591
  0.93980000   2.28869127
  0.93980000   2.23263883
  0.93980000   2.28689668
  0.93980000   2.23453842
  0.93980000   2.28523839
  0.93980000   2.23628475
  0.93980000   2.28370221
  0.93980000   2.23789466
  0.93980000   2.28227607
  0.93980000   2.23938238
  0.93980000   2.28094963
  0.93980000   2.24076006
  0.93980000   2.27971396
  0.93980000   2.24203818
  0.93980000   2.27856125
  0.93980000   2.24322584
  0.93980000   2.27748465
  0.93980000   2.24433097
  0.93980000   2.27647810
  0.93980000   2.24536059
  0.93980000   2.27553620
  0.93990000   2.29295342
  0.93990000   2.22869084
  0.93990000   2.29100490
  0.93990000   2.23078333
  0.93990000   2.28920625
  0.93990000   2.23270470
  0.93990000   2.28754060
  0.93990000   2.23447505
  0.93990000   2.28599386
  0.93990000   2.23611115
  0.93990000   2.28455411
  0.93990000   2.23762715
  0.93990000   2.28321117
  0.93990000   2.23903509
  0.93990000   2.28195629
  0.93990000   2.24034532
  0.93990000   2.28078185
  0.93990000   2.24156677
  0.93990000   2.27968120
  0.93990000   2.24270725
  0.93990000   2.27864845
  0.93990000   2.24377360
  0.93990000   2.27767841
  0.94000000   2.29532288
  0.94000000   2.22672947
  0.94000000   2.29338208
  0.94000000   2.22883267
  0.94000000   2.29158790
  0.94000000   2.23076698
  0.94000000   2.28992349
  0.94000000   2.23255255
  0.94000000   2.28837482
  0.94000000   2.23420616
  0.94000000   2.28693009
  0.94000000   2.23574188
  0.94000000   2.28557924
  0.94000000   2.23717169
  0.94000000   2.28431364
  0.94000000   2.23850584
  0.94000000   2.28312583
  0.94000000   2.23975315
  0.94000000   2.28200929
  0.94000000   2.24092129
  0.94000000   2.28095832
  0.94000000   2.24201699
  0.94000000   2.27996786
  0.94010000   2.29774355
  0.94010000   2.22468465
  0.94010000   2.29581870
  0.94010000   2.22678958
  0.94010000   2.29403742
  0.94010000   2.22872780
  0.94010000   2.29238285
  0.94010000   2.23051951
  0.94010000   2.29084101
  0.94010000   2.23218153
  0.94010000   2.28940013
  0.94010000   2.23372792
  0.94010000   2.28805024
  0.94010000   2.23517062
  0.94010000   2.28678281
  0.94010000   2.23651980
  0.94010000   2.28559050
  0.94010000   2.23778421
  0.94010000   2.28446689
  0.94010000   2.23897143
  0.94010000   2.28340640
  0.94010000   2.24008809
  0.94010000   2.28240411
  0.94020000   2.30021117
  0.94020000   2.22255974
  0.94020000   2.29831023
  0.94020000   2.22465746
  0.94020000   2.29655008
  0.94020000   2.22659046
  0.94020000   2.29491381
  0.94020000   2.22837909
  0.94020000   2.29338745
  0.94020000   2.23004020
  0.94020000   2.29195926
  0.94020000   2.23158788
  0.94020000   2.29061932
  0.94020000   2.23303406
  0.94020000   2.28935917
  0.94020000   2.23438886
  0.94020000   2.28817153
  0.94020000   2.23566099
  0.94020000   2.28705007
  0.94020000   2.23685796
  0.94020000   2.28598930
  0.94020000   2.23798633
  0.94020000   2.28498440
  0.94030000   2.30272119
  0.94030000   2.22035857
  0.94030000   2.30085176
  0.94030000   2.22244024
  0.94030000   2.29912061
  0.94030000   2.22435900
  0.94030000   2.29751081
  0.94030000   2.22613534
  0.94030000   2.29600836
  0.94030000   2.22778616
  0.94030000   2.29460153
  0.94030000   2.22932563
  0.94030000   2.29328043
  0.94030000   2.23076564
  0.94030000   2.29203663
  0.94030000   2.23211634
  0.94030000   2.29086290
  0.94030000   2.23338640
  0.94030000   2.28975298
  0.94030000   2.23458330
  0.94030000   2.28870143
  0.94030000   2.23571352
  0.94030000   2.28770349
  0.94040000   2.30526889
  0.94040000   2.21808539
  0.94040000   2.30343805
  0.94040000   2.22014246
  0.94040000   2.30174333
  0.94040000   2.22203818
  0.94040000   2.30016774
  0.94040000   2.22379317
  0.94040000   2.29869722
  0.94040000   2.22542447
  0.94040000   2.29732006
  0.94040000   2.22694626
  0.94040000   2.29602637
  0.94040000   2.22837049
  0.94040000   2.29480774
  0.94040000   2.22970729
  0.94040000   2.29365698
  0.94040000   2.23096533
  0.94040000   2.29256786
  0.94040000   2.23215208
  0.94040000   2.29153500
  0.94040000   2.23327398
  0.94040000   2.29055367
  0.94050000   2.30784936
  0.94050000   2.21574482
  0.94050000   2.30606365
  0.94050000   2.21776911
  0.94050000   2.30441221
  0.94050000   2.21963335
  0.94050000   2.30287798
  0.94050000   2.22135832
  0.94050000   2.30144687
  0.94050000   2.22296114
  0.94050000   2.30010714
  0.94050000   2.22445608
  0.94050000   2.29884892
  0.94050000   2.22585512
  0.94050000   2.29766380
  0.94050000   2.22716840
  0.94050000   2.29654462
  0.94050000   2.22840461
  0.94050000   2.29548519
  0.94050000   2.22957117
  0.94050000   2.29448013
  0.94050000   2.23067456
  0.94050000   2.29352476
  0.94060000   2.31045760
  0.94060000   2.21334181
  0.94060000   2.30872291
  0.94060000   2.21532564
  0.94060000   2.30712094
  0.94060000   2.21715044
  0.94060000   2.30563456
  0.94060000   2.21883718
  0.94060000   2.30424963
  0.94060000   2.22040307
  0.94060000   2.30295441
  0.94060000   2.22186246
  0.94060000   2.30173902
  0.94060000   2.22322735
  0.94060000   2.30059506
  0.94060000   2.22450793
  0.94060000   2.29951539
  0.94060000   2.22571287
  0.94060000   2.29849383
  0.94060000   2.22684962
  0.94060000   2.29752505
  0.94060000   2.22792462
  0.94060000   2.29660439
  0.94070000   2.31308859
  0.94070000   2.21088156
  0.94070000   2.31141011
  0.94070000   2.21281782
  0.94070000   2.30986306
  0.94070000   2.21459586
  0.94070000   2.30843023
  0.94070000   2.21623679
  0.94070000   2.30709747
  0.94070000   2.21775795
  0.94070000   2.30585299
  0.94070000   2.21917372
  0.94070000   2.30468693
  0.94070000   2.22049619
  0.94070000   2.30359090
  0.94070000   2.22173554
  0.94070000   2.30255776
  0.94070000   2.22290046
  0.94070000   2.30158137
  0.94070000   2.22399841
  0.94070000   2.30065641
  0.94070000   2.22503581
  0.94070000   2.29977826
  0.94080000   2.31573731
  0.94080000   2.20836944
  0.94080000   2.31411949
  0.94080000   2.21025173
  0.94080000   2.31263202
  0.94080000   2.21197638
  0.94080000   2.31125763
  0.94080000   2.21356468
  0.94080000   2.30998211
  0.94080000   2.21503406
  0.94080000   2.30879368
  0.94080000   2.21639900
  0.94080000   2.30768245
  0.94080000   2.21767161
  0.94080000   2.30664008
  0.94080000   2.21886210
  0.94080000   2.30565943
  0.94080000   2.21997916
  0.94080000   2.30473438
  0.94080000   2.22103026
  0.94080000   2.30385964
  0.94080000   2.22202182
  0.94080000   2.30303060
  0.94090000   2.31839883
  0.94090000   2.20581099
  0.94090000   2.31684535
  0.94090000   2.20763360
  0.94090000   2.31542130
  0.94090000   2.20929904
  0.94090000   2.31410932
  0.94090000   2.21082872
  0.94090000   2.31289518
  0.94090000   2.21224020
  0.94090000   2.31176709
  0.94090000   2.21354803
  0.94090000   2.31071515
  0.94090000   2.21476435
  0.94090000   2.30973103
  0.94090000   2.21589940
  0.94090000   2.30880762
  0.94090000   2.21696189
  0.94090000   2.30793882
  0.94090000   2.21795926
  0.94090000   2.30711935
  0.94090000   2.21889795
  0.94090000   2.30634466
  0.94100000   2.32106833
  0.94100000   2.20321177
  0.94100000   2.31958211
  0.94100000   2.20496981
  0.94100000   2.31822448
  0.94100000   2.20657103
  0.94100000   2.31697800
  0.94100000   2.20803703
  0.94100000   2.31582841
  0.94100000   2.20938547
  0.94100000   2.31476388
  0.94100000   2.21063096
  0.94100000   2.31377456
  0.94100000   2.21178569
  0.94100000   2.31285209
  0.94100000   2.21285993
  0.94100000   2.31198940
  0.94100000   2.21386238
  0.94100000   2.31118041
  0.94100000   2.21480049
  0.94100000   2.31041986
  0.94100000   2.21568069
  0.94100000   2.30970322
  0.94110000   2.32374117
  0.94110000   2.20057736
  0.94110000   2.32232439
  0.94110000   2.20226672
  0.94110000   2.32103534
  0.94110000   2.20379963
  0.94110000   2.31985654
  0.94110000   2.20519783
  0.94110000   2.31877368
  0.94110000   2.20647911
  0.94110000   2.31777493
  0.94110000   2.20765816
  0.94110000   2.31685041
  0.94110000   2.20874718
  0.94110000   2.31599179
  0.94110000   2.20975649
  0.94110000   2.31519202
  0.94110000   2.21069480
  0.94110000   2.31444502
  0.94110000   2.21156956
  0.94110000   2.31374559
  0.94110000   2.21238720
  0.94110000   2.31308919
  0.94120000   2.32641295
  0.94120000   2.19791325
  0.94120000   2.32506701
  0.94120000   2.19953067
  0.94120000   2.32384792
  0.94120000   2.20099204
  0.94120000   2.32273811
  0.94120000   2.20231931
  0.94120000   2.32172322
  0.94120000   2.20353037
  0.94120000   2.32079142
  0.94120000   2.20463997
  0.94120000   2.31993281
  0.94120000   2.20566040
  0.94120000   2.31913908
  0.94120000   2.20660197
  0.94120000   2.31840317
  0.94120000   2.20747342
  0.94120000   2.31771905
  0.94120000   2.20828221
  0.94120000   2.31708151
  0.94120000   2.20903476
  0.94120000   2.31648605
  0.94130000   2.32907948
  0.94130000   2.19522483
  0.94130000   2.32780512
  0.94130000   2.19676783
  0.94130000   2.32665659
  0.94130000   2.19815535
  0.94130000   2.32561625
  0.94130000   2.19940950
  0.94130000   2.32466969
  0.94130000   2.20054831
  0.94130000   2.32380505
  0.94130000   2.20158661
  0.94130000   2.32301244
  0.94130000   2.20253673
  0.94130000   2.32228353
  0.94130000   2.20340903
  0.94130000   2.32161129
  0.94130000   2.20421226
  0.94130000   2.32098968
  0.94130000   2.20495389
  0.94130000   2.32041352
  0.94130000   2.20564034
  0.94130000   2.31987834
  0.94140000   2.33173687
  0.94140000   2.19251731
  0.94140000   2.33053415
  0.94140000   2.19398421
  0.94140000   2.32945610
  0.94140000   2.19529640
  0.94140000   2.32848495
  0.94140000   2.19647619
  0.94140000   2.32760626
  0.94140000   2.19754171
  0.94140000   2.32680813
  0.94140000   2.19850790
  0.94140000   2.32608066
  0.94140000   2.19938714
  0.94140000   2.32541553
  0.94140000   2.20018983
  0.94140000   2.32480571
  0.94140000   2.20092475
  0.94140000   2.32424517
  0.94140000   2.20159937
  0.94140000   2.32372876
  0.94140000   2.20222012
  0.94140000   2.32325202
  0.94150000   2.33438150
  0.94150000   2.18979567
  0.94150000   2.33324993
  0.94150000   2.19118554
  0.94150000   2.33224160
  0.94150000   2.19242174
  0.94150000   2.33133868
  0.94150000   2.19352678
  0.94150000   2.33052666
  0.94150000   2.19451892
  0.94150000   2.32979361
  0.94150000   2.19541319
  0.94150000   2.32912963
  0.94150000   2.19622203
  0.94150000   2.32852640
  0.94150000   2.19695587
  0.94150000   2.32797687
  0.94150000   2.19762352
  0.94150000   2.32747506
  0.94150000   2.19823247
  0.94150000   2.32701581
  0.94150000   2.19878914
  0.94150000   2.32659468
  0.94160000   2.33701011
  0.94160000   2.18706465
  0.94160000   2.33594862
  0.94160000   2.18837727
  0.94160000   2.33500871
  0.94160000   2.18953757
  0.94160000   2.33417244
  0.94160000   2.19056827
  0.94160000   2.33342527
  0.94160000   2.19148777
  0.94160000   2.33275523
  0.94160000   2.19231119
  0.94160000   2.33215239
  0.94160000   2.19305102
  0.94160000   2.33160845
  0.94160000   2.19371774
  0.94160000   2.33111638
  0.94160000   2.19432017
  0.94160000   2.33067020
  0.94160000   2.19486580
  0.94160000   2.33026479
  0.94160000   2.19536105
  0.94160000   2.32989574
  0.94170000   2.33961970
  0.94170000   2.18432871
  0.94170000   2.33862678
  0.94170000   2.18556448
  0.94170000   2.33775350
  0.94170000   2.18664965
  0.94170000   2.33698181
  0.94170000   2.18760715
  0.94170000   2.33629713
  0.94170000   2.18845551
  0.94170000   2.33568745
  0.94170000   2.18920992
  0.94170000   2.33514287
  0.94170000   2.18988294
  0.94170000   2.33465508
  0.94170000   2.19048506
  0.94170000   2.33421707
  0.94170000   2.19102512
  0.94170000   2.33382290
  0.94170000   2.19151059
  0.94170000   2.33346749
  0.94170000   2.19194787
  0.94170000   2.33314645
  0.94180000   2.34220764
  0.94180000   2.18159199
  0.94180000   2.34128138
  0.94180000   2.18275189
  0.94180000   2.34047250
  0.94180000   2.18376332
  0.94180000   2.33976289
  0.94180000   2.18464938
  0.94180000   2.33913791
  0.94180000   2.18542873
  0.94180000   2.33858555
  0.94180000   2.18611663
  0.94180000   2.33809592
  0.94180000   2.18672568
  0.94180000   2.33766072
  0.94180000   2.18726637
  0.94180000   2.33727301
  0.94180000   2.18774752
  0.94180000   2.33692686
  0.94180000   2.18817661
  0.94180000   2.33661726
  0.94180000   2.18855998
  0.94180000   2.33633988
  0.94190000   2.34477159
  0.94190000   2.17885833
  0.94190000   2.34390973
  0.94190000   2.17994386
  0.94190000   2.34316272
  0.94190000   2.18088344
  0.94190000   2.34251235
  0.94190000   2.18170035
  0.94190000   2.34194396
  0.94190000   2.18241336
  0.94190000   2.34144556
  0.94190000   2.18303776
  0.94190000   2.34100727
  0.94190000   2.18358618
  0.94190000   2.34062086
  0.94190000   2.18406909
  0.94190000   2.34027942
  0.94190000   2.18449529
  0.94190000   2.33997713
  0.94190000   2.18487217
  0.94190000   2.33970901
  0.94190000   2.18520605
  0.94190000   2.33947083
  0.94200000   2.34730952
  0.94200000   2.17613123
  0.94200000   2.34650956
  0.94200000   2.17714432
  0.94200000   2.34582159
  0.94200000   2.17801439
  0.94200000   2.34522737
  0.94200000   2.17876487
  0.94200000   2.34471223
  0.94200000   2.17941461
  0.94200000   2.34426422
  0.94200000   2.17997894
  0.94200000   2.34387350
  0.94200000   2.18047044
  0.94200000   2.34353193
  0.94200000   2.18089956
  0.94200000   2.34323267
  0.94200000   2.18127501
  0.94200000   2.34296999
  0.94200000   2.18160412
  0.94200000   2.34273902
  0.94200000   2.18189309
  0.94200000   2.34253563
  0.94210000   2.34981970
  0.94210000   2.17341385
  0.94210000   2.34907892
  0.94210000   2.17435680
  0.94210000   2.34844699
  0.94210000   2.17516006
  0.94210000   2.34790566
  0.94210000   2.17584719
  0.94210000   2.34744029
  0.94210000   2.17643706
  0.94210000   2.34703899
  0.94210000   2.17694500
  0.94210000   2.34669200
  0.94210000   2.17738355
  0.94210000   2.34639128
  0.94210000   2.17776304
  0.94210000   2.34613011
  0.94210000   2.17809211
  0.94210000   2.34590288
  0.94210000   2.17837795
  0.94210000   2.34570484
  0.94210000   2.17862663
  0.94210000   2.34553200
  0.94220000   2.35230070
  0.94220000   2.17070904
  0.94220000   2.35161621
  0.94220000   2.17158445
  0.94220000   2.35103719
  0.94220000   2.17232389
  0.94220000   2.35054540
  0.94220000   2.17295098
  0.94220000   2.35012625
  0.94220000   2.17348460
  0.94220000   2.34976795
  0.94220000   2.17394002
  0.94220000   2.34946086
  0.94220000   2.17432968
  0.94220000   2.34919707
  0.94220000   2.17466380
  0.94220000   2.34897001
  0.94220000   2.17495084
  0.94220000   2.34877422
  0.94220000   2.17519787
  0.94220000   2.34860511
  0.94220000   2.17541077
  0.94220000   2.34845882
  0.94230000   2.35475134
  0.94230000   2.16801933
  0.94230000   2.35412017
  0.94230000   2.16883004
  0.94230000   2.35359085
  0.94230000   2.16950883
  0.94230000   2.35314520
  0.94230000   2.17007937
  0.94230000   2.35276872
  0.94230000   2.17056049
  0.94230000   2.35244975
  0.94230000   2.17096734
  0.94230000   2.35217882
  0.94230000   2.17131221
  0.94230000   2.35194818
  0.94230000   2.17160516
  0.94230000   2.35175144
  0.94230000   2.17185447
  0.94230000   2.35158330
  0.94230000   2.17206698
  0.94230000   2.35143937
  0.94230000   2.17224839
  0.94230000   2.35131597
  0.94240000   2.35717067
  0.94240000   2.16534693
  0.94240000   2.35658980
  0.94240000   2.16609595
  0.94240000   2.35610696
  0.94240000   2.16671743
  0.94240000   2.35570407
  0.94240000   2.16723501
  0.94240000   2.35536676
  0.94240000   2.16766742
  0.94240000   2.35508357
  0.94240000   2.16802964
  0.94240000   2.35484519
  0.94240000   2.16833377
  0.94240000   2.35464410
  0.94240000   2.16858964
  0.94240000   2.35447410
  0.94240000   2.16880531
  0.94240000   2.35433012
  0.94240000   2.16898738
  0.94240000   2.35420795
  0.94240000   2.16914133
  0.94240000   2.35410410
  0.94250000   2.35955801
  0.94250000   2.16269377
  0.94250000   2.35902439
  0.94250000   2.16338423
  0.94250000   2.35858483
  0.94250000   2.16395181
  0.94250000   2.35822137
  0.94250000   2.16442005
  0.94250000   2.35791985
  0.94250000   2.16480752
  0.94250000   2.35766900
  0.94250000   2.16512898
  0.94250000   2.35745978
  0.94250000   2.16539628
  0.94250000   2.35728486
  0.94250000   2.16561900
  0.94250000   2.35713831
  0.94250000   2.16580490
  0.94250000   2.35701527
  0.94250000   2.16596034
  0.94250000   2.35691176
  0.94250000   2.16609049
  0.94250000   2.35682450
  0.94260000   2.36191285
  0.94260000   2.16006150
  0.94260000   2.36142347
  0.94260000   2.16069660
  0.94260000   2.36102403
  0.94260000   2.16121370
  0.94260000   2.36069678
  0.94260000   2.16163621
  0.94260000   2.36042779
  0.94260000   2.16198244
  0.94260000   2.36020605
  0.94260000   2.16226690
  0.94260000   2.36002277
  0.94260000   2.16250111
  0.94260000   2.35987091
  0.94260000   2.16269436
  0.94260000   2.35974479
  0.94260000   2.16285410
  0.94260000   2.35963979
  0.94260000   2.16298638
  0.94260000   2.35955219
  0.94260000   2.16309609
  0.94260000   2.35947892
  0.94270000   2.36423488
  0.94270000   2.15745150
  0.94270000   2.36378677
  0.94270000   2.15803447
  0.94270000   2.36342440
  0.94270000   2.15850453
  0.94270000   2.36313027
  0.94270000   2.15888483
  0.94270000   2.36289072
  0.94270000   2.15919342
  0.94270000   2.36269504
  0.94270000   2.15944444
  0.94270000   2.36253474
  0.94270000   2.15964910
  0.94270000   2.36240308
  0.94270000   2.15981631
  0.94270000   2.36229465
  0.94270000   2.15995318
  0.94270000   2.36220512
  0.94270000   2.16006545
  0.94270000   2.36213098
  0.94270000   2.16015771
  0.94270000   2.36206942
  0.94280000   2.36652396
  0.94280000   2.15486492
  0.94280000   2.36611422
  0.94280000   2.15539899
  0.94280000   2.36578598
  0.94280000   2.15582536
  0.94280000   2.36552201
  0.94280000   2.15616690
  0.94280000   2.36530899
  0.94280000   2.15644126
  0.94280000   2.36513654
  0.94280000   2.15666223
  0.94280000   2.36499651
  0.94280000   2.15684062
  0.94280000   2.36488246
  0.94280000   2.15698494
  0.94280000   2.36478928
  0.94280000   2.15710197
  0.94280000   2.36471292
  0.94280000   2.15719706
  0.94280000   2.36465013
  0.94280000   2.15727449
  0.94280000   2.36459832
  0.94290000   2.36878009
  0.94290000   2.15230270
  0.94290000   2.36840593
  0.94290000   2.15279105
  0.94290000   2.36810899
  0.94290000   2.15317701
  0.94290000   2.36787240
  0.94290000   2.15348306
  0.94290000   2.36768320
  0.94290000   2.15372646
  0.94290000   2.36753137
  0.94290000   2.15392055
  0.94290000   2.36740912
  0.94290000   2.15407570
  0.94290000   2.36731035
  0.94290000   2.15420002
  0.94290000   2.36723025
  0.94290000   2.15429988
  0.94290000   2.36716506
  0.94290000   2.15438030
  0.94290000   2.36711179
  0.94290000   2.15444522
  0.94290000   2.36706806
  0.94300000   2.37100340
  0.94300000   2.14976558
  0.94300000   2.37066213
  0.94300000   2.15021131
  0.94300000   2.37039382
  0.94300000   2.15056002
  0.94300000   2.37018199
  0.94300000   2.15083373
  0.94300000   2.37001409
  0.94300000   2.15104923
  0.94300000   2.36988050
  0.94300000   2.15121936
  0.94300000   2.36977380
  0.94300000   2.15135405
  0.94300000   2.36968822
  0.94300000   2.15146096
  0.94300000   2.36961931
  0.94300000   2.15154607
  0.94300000   2.36956355
  0.94300000   2.15161401
  0.94300000   2.36951821
  0.94300000   2.15166843
  0.94300000   2.36948115
  0.94310000   2.37319413
  0.94310000   2.14725411
  0.94310000   2.37288319
  0.94310000   2.14766025
  0.94310000   2.37264098
  0.94310000   2.14797473
  0.94310000   2.37245148
  0.94310000   2.14821907
  0.94310000   2.37230256
  0.94310000   2.14840951
  0.94310000   2.37218504
  0.94310000   2.14855840
  0.94310000   2.37209187
  0.94310000   2.14867514
  0.94310000   2.37201766
  0.94310000   2.14876697
  0.94310000   2.37195825
  0.94310000   2.14883944
  0.94310000   2.37191042
  0.94310000   2.14889683
  0.94310000   2.37187168
  0.94310000   2.14894246
  0.94310000   2.37184010
  0.94320000   2.37535262
  0.94320000   2.14476868
  0.94320000   2.37506957
  0.94320000   2.14513814
  0.94320000   2.37485110
  0.94320000   2.14542127
  0.94320000   2.37468166
  0.94320000   2.14563903
  0.94320000   2.37454961
  0.94320000   2.14580706
  0.94320000   2.37444620
  0.94320000   2.14593717
  0.94320000   2.37436478
  0.94320000   2.14603824
  0.94320000   2.37430031
  0.94320000   2.14611705
  0.94320000   2.37424895
  0.94320000   2.14617875
  0.94320000   2.37420777
  0.94320000   2.14622725
  0.94320000   2.37417449
  0.94320000   2.14626556
  0.94320000   2.37414740
  0.94330000   2.37747929
  0.94330000   2.14230954
  0.94330000   2.37722182
  0.94330000   2.14264512
  0.94330000   2.37702488
  0.94330000   2.14289963
  0.94330000   2.37687343
  0.94330000   2.14309340
  0.94330000   2.37675632
  0.94330000   2.14324146
  0.94330000   2.37666525
  0.94330000   2.14335502
  0.94330000   2.37659399
  0.94330000   2.14344246
  0.94330000   2.37653785
  0.94330000   2.14351008
  0.94330000   2.37649330
  0.94330000   2.14356262
  0.94330000   2.37645765
  0.94330000   2.14360366
  0.94330000   2.37642889
  0.94330000   2.14363590
  0.94330000   2.37640546
  0.94340000   2.37957463
  0.94340000   2.13987683
  0.94340000   2.37934058
  0.94340000   2.14018118
  0.94340000   2.37916310
  0.94340000   2.14040964
  0.94340000   2.37902772
  0.94340000   2.14058183
  0.94340000   2.37892381
  0.94340000   2.14071214
  0.94340000   2.37884351
  0.94340000   2.14081118
  0.94340000   2.37878101
  0.94340000   2.14088680
  0.94340000   2.37873197
  0.94340000   2.14094483
  0.94340000   2.37869315
  0.94340000   2.14098962
  0.94340000   2.37866212
  0.94340000   2.14102441
  0.94340000   2.37863707
  0.94340000   2.14105163
  0.94340000   2.37861662
  0.94350000   2.38163917
  0.94350000   2.13747057
  0.94350000   2.38142650
  0.94350000   2.13774621
  0.94350000   2.38126659
  0.94350000   2.13795101
  0.94350000   2.38114554
  0.94350000   2.13810385
  0.94350000   2.38105325
  0.94350000   2.13821844
  0.94350000   2.38098233
  0.94350000   2.13830477
  0.94350000   2.38092736
  0.94350000   2.13837016
  0.94350000   2.38088435
  0.94350000   2.13842001
  0.94350000   2.38085034
  0.94350000   2.13845826
  0.94350000   2.38082315
  0.94350000   2.13848785
  0.94350000   2.38080115
  0.94350000   2.13851093
  0.94350000   2.38078313
  0.94360000   2.38367350
  0.94360000   2.13509066
  0.94360000   2.38348032
  0.94360000   2.13534000
  0.94360000   2.38333622
  0.94360000   2.13552337
  0.94360000   2.38322792
  0.94360000   2.13565890
  0.94360000   2.38314583
  0.94360000   2.13575960
  0.94360000   2.38308305
  0.94360000   2.13583484
  0.94360000   2.38303454
  0.94360000   2.13589143
  0.94360000   2.38299663
  0.94360000   2.13593430
  0.94360000   2.38296666
  0.94360000   2.13596705
  0.94360000   2.38294265
  0.94360000   2.13599230
  0.94360000   2.38292316
  0.94360000   2.13601198
  0.94360000   2.38290710
  0.94370000   2.38567824
  0.94370000   2.13273696
  0.94370000   2.38550277
  0.94370000   2.13296223
  0.94370000   2.38537289
  0.94370000   2.13312625
  0.94370000   2.38527589
  0.94370000   2.13324634
  0.94370000   2.38520275
  0.94370000   2.13333480
  0.94370000   2.38514701
  0.94370000   2.13340040
  0.94370000   2.38510402
  0.94370000   2.13344942
  0.94370000   2.38507044
  0.94370000   2.13348637
  0.94370000   2.38504385
  0.94370000   2.13351450
  0.94370000   2.38502247
  0.94370000   2.13353615
  0.94370000   2.38500502
  0.94370000   2.13355303
  0.94370000   2.38499056
  0.94380000   2.38765403
  0.94380000   2.13040924
  0.94380000   2.38749465
  0.94380000   2.13061254
  0.94380000   2.38737749
  0.94380000   2.13075912
  0.94380000   2.38729050
  0.94380000   2.13086547
  0.94380000   2.38722519
  0.94380000   2.13094318
  0.94380000   2.38717553
  0.94380000   2.13100041
  0.94380000   2.38713727
  0.94380000   2.13104294
  0.94380000   2.38710733
  0.94380000   2.13107487
  0.94380000   2.38708355
  0.94380000   2.13109914
  0.94380000   2.38706435
  0.94380000   2.13111781
  0.94380000   2.38704858
  0.94380000   2.13113239
  0.94380000   2.38703542
  0.94390000   2.38960154
  0.94390000   2.12810721
  0.94390000   2.38945672
  0.94390000   2.12829050
  0.94390000   2.38935096
  0.94390000   2.12842140
  0.94390000   2.38927281
  0.94390000   2.12851556
  0.94390000   2.38921432
  0.94390000   2.12858385
  0.94390000   2.38916991
  0.94390000   2.12863383
  0.94390000   2.38913566
  0.94390000   2.12867081
  0.94390000   2.38910881
  0.94390000   2.12869851
  0.94390000   2.38908737
  0.94390000   2.12871953
  0.94390000   2.38906996
  0.94390000   2.12873574
  0.94390000   2.38905557
  0.94390000   2.12874844
  0.94390000   2.38904346
  0.94400000   2.39152145
  0.94400000   2.12583053
  0.94400000   2.39138980
  0.94400000   2.12599564
  0.94400000   2.39129420
  0.94400000   2.12611248
  0.94400000   2.39122384
  0.94400000   2.12619585
  0.94400000   2.39117130
  0.94400000   2.12625589
  0.94400000   2.39113140
  0.94400000   2.12629962
  0.94400000   2.39110057
  0.94400000   2.12633186
  0.94400000   2.39107630
  0.94400000   2.12635598
  0.94400000   2.39105683
  0.94400000   2.12637430
  0.94400000   2.39104090
  0.94400000   2.12638847
  0.94400000   2.39102763
  0.94400000   2.12639963
  0.94400000   2.39101638
  0.94410000   2.39341443
  0.94410000   2.12357883
  0.94410000   2.39329466
  0.94410000   2.12372745
  0.94410000   2.39320812
  0.94410000   2.12383170
  0.94410000   2.39314462
  0.94410000   2.12390553
  0.94410000   2.39309724
  0.94410000   2.12395839
  0.94410000   2.39306122
  0.94410000   2.12399672
  0.94410000   2.39303330
  0.94410000   2.12402493
  0.94410000   2.39301121
  0.94410000   2.12404603
  0.94410000   2.39299336
  0.94410000   2.12406210
  0.94410000   2.39297866
  0.94410000   2.12407459
  0.94410000   2.39296631
  0.94410000   2.12408448
  0.94410000   2.39295577
  0.94420000   2.39528117
  0.94420000   2.12135170
  0.94420000   2.39517211
  0.94420000   2.12148540
  0.94420000   2.39509362
  0.94420000   2.12157841
  0.94420000   2.39503615
  0.94420000   2.12164382
  0.94420000   2.39499325
  0.94420000   2.12169042
  0.94420000   2.39496056
  0.94420000   2.12172412
  0.94420000   2.39493510
  0.94420000   2.12174889
  0.94420000   2.39491483
  0.94420000   2.12176746
  0.94420000   2.39489834
  0.94420000   2.12178165
  0.94420000   2.39488465
  0.94420000   2.12179274
  0.94420000   2.39487307
  0.94420000   2.12180160
  0.94420000   2.39486310
  0.94430000   2.39712235
  0.94430000   2.11914870
  0.94430000   2.39702292
  0.94430000   2.11926893
  0.94430000   2.39695158
  0.94430000   2.11935191
  0.94430000   2.39689939
  0.94430000   2.11940993
  0.94430000   2.39686037
  0.94430000   2.11945109
  0.94430000   2.39683053
  0.94430000   2.11948080
  0.94430000   2.39680716
  0.94430000   2.11950266
  0.94430000   2.39678843
  0.94430000   2.11951909
  0.94430000   2.39677308
  0.94430000   2.11953172
  0.94430000   2.39676023
  0.94430000   2.11954166
  0.94430000   2.39674927
  0.94430000   2.11954966
  0.94430000   2.39673978
  0.94440000   2.39893866
  0.94440000   2.11696937
  0.94440000   2.39884787
  0.94440000   2.11707745
  0.94440000   2.39878287
  0.94440000   2.11715153
  0.94440000   2.39873530
  0.94440000   2.11720305
  0.94440000   2.39869964
  0.94440000   2.11723949
  0.94440000   2.39867223
  0.94440000   2.11726579
  0.94440000   2.39865064
  0.94440000   2.11728517
  0.94440000   2.39863320
  0.94440000   2.11729981
  0.94440000   2.39861879
  0.94440000   2.11731114
  0.94440000   2.39860664
  0.94440000   2.11732012
  0.94440000   2.39859620
  0.94440000   2.11732741
  0.94440000   2.39858710
  0.94450000   2.40073076
  0.94450000   2.11481325
  0.94450000   2.40064771
  0.94450000   2.11491041
  0.94450000   2.40058832
  0.94450000   2.11497657
  0.94450000   2.40054478
  0.94450000   2.11502239
  0.94450000   2.40051203
  0.94450000   2.11505475
  0.94450000   2.40048671
  0.94450000   2.11507812
  0.94450000   2.40046662
  0.94450000   2.11509541
  0.94450000   2.40045026
  0.94450000   2.11510854
  0.94450000   2.40043665
  0.94450000   2.11511878
  0.94450000   2.40042507
  0.94450000   2.11512697
  0.94450000   2.40041507
  0.94450000   2.11513368
  0.94450000   2.40040630
  0.94460000   2.40249931
  0.94460000   2.11267985
  0.94460000   2.40242320
  0.94460000   2.11276720
  0.94460000   2.40236875
  0.94460000   2.11282635
  0.94460000   2.40232874
  0.94460000   2.11286719
  0.94460000   2.40229849
  0.94460000   2.11289602
  0.94460000   2.40227496
  0.94460000   2.11291689
  0.94460000   2.40225613
  0.94460000   2.11293240
  0.94460000   2.40224070
  0.94460000   2.11294426
  0.94460000   2.40222774
  0.94460000   2.11295359
  0.94460000   2.40221666
  0.94460000   2.11296111
  0.94460000   2.40220702
  0.94460000   2.11296734
  0.94460000   2.40219853
  0.94470000   2.40424496
  0.94470000   2.11056869
  0.94470000   2.40417503
  0.94470000   2.11064725
  0.94470000   2.40412496
  0.94470000   2.11070020
  0.94470000   2.40408802
  0.94470000   2.11073669
  0.94470000   2.40405993
  0.94470000   2.11076246
  0.94470000   2.40403792
  0.94470000   2.11078119
  0.94470000   2.40402018
  0.94470000   2.11079520
  0.94470000   2.40400551
  0.94470000   2.11080599
  0.94470000   2.40399312
  0.94470000   2.11081456
  0.94470000   2.40398245
  0.94470000   2.11082153
  0.94470000   2.40397312
  0.94470000   2.11082734
  0.94470000   2.40396486
  0.94480000   2.40596834
  0.94480000   2.10847928
  0.94480000   2.40590394
  0.94480000   2.10854997
  0.94480000   2.40585771
  0.94480000   2.10859744
  0.94480000   2.40582345
  0.94480000   2.10863013
  0.94480000   2.40579723
  0.94480000   2.10865328
  0.94480000   2.40577651
  0.94480000   2.10867018
  0.94480000   2.40575969
  0.94480000   2.10868291
  0.94480000   2.40574568
  0.94480000   2.10869280
  0.94480000   2.40573376
  0.94480000   2.10870072
  0.94480000   2.40572344
  0.94480000   2.10870723
  0.94480000   2.40571437
  0.94480000   2.10871270
  0.94480000   2.40570631
  0.94490000   2.40767008
  0.94490000   2.10641112
  0.94490000   2.40761059
  0.94490000   2.10647478
  0.94490000   2.40756775
  0.94490000   2.10651743
  0.94490000   2.40753582
  0.94490000   2.10654681
  0.94490000   2.40751120
  0.94490000   2.10656769
  0.94490000   2.40749160
  0.94490000   2.10658303
  0.94490000   2.40747556
  0.94490000   2.10659467
  0.94490000   2.40746210
  0.94490000   2.10660381
  0.94490000   2.40745059
  0.94490000   2.10661118
  0.94490000   2.40744056
  0.94490000   2.10661730
  0.94490000   2.40743172
  0.94490000   2.10662247
  0.94490000   2.40742384
  0.94500000   2.40935077
  0.94500000   2.10436372
  0.94500000   2.40929566
  0.94500000   2.10442112
  0.94500000   2.40925579
  0.94500000   2.10445952
  0.94500000   2.40922588
  0.94500000   2.10448602
  0.94500000   2.40920265
  0.94500000   2.10450495
  0.94500000   2.40918401
  0.94500000   2.10451895
  0.94500000   2.40916863
  0.94500000   2.10452967
  0.94500000   2.40915565
  0.94500000   2.10453816
  0.94500000   2.40914448
  0.94500000   2.10454508
  0.94500000   2.40913471
  0.94500000   2.10455085
  0.94500000   2.40912607
  0.94500000   2.10455577
  0.94500000   2.40911834
  0.94510000   2.41101101
  0.94510000   2.10233659
  0.94510000   2.41095978
  0.94510000   2.10238842
  0.94510000   2.41092252
  0.94510000   2.10242309
  0.94510000   2.41089438
  0.94510000   2.10244709
  0.94510000   2.41087233
  0.94510000   2.10246433
  0.94510000   2.41085451
  0.94510000   2.10247719
  0.94510000   2.41083971
  0.94510000   2.10248713
  0.94510000   2.41082714
  0.94510000   2.10249507
  0.94510000   2.41081626
  0.94510000   2.10250159
  0.94510000   2.41080672
  0.94510000   2.10250708
  0.94510000   2.41079824
  0.94510000   2.10251178
  0.94510000   2.41079065
  0.94520000   2.41265137
  0.94520000   2.10032926
  0.94520000   2.41260358
  0.94520000   2.10037614
  0.94520000   2.41256862
  0.94520000   2.10040753
  0.94520000   2.41254200
  0.94520000   2.10042936
  0.94520000   2.41252099
  0.94520000   2.10044515
  0.94520000   2.41250387
  0.94520000   2.10045703
  0.94520000   2.41248956
  0.94520000   2.10046630
  0.94520000   2.41247734
  0.94520000   2.10047377
  0.94520000   2.41246672
  0.94520000   2.10047995
  0.94520000   2.41245737
  0.94520000   2.10048519
  0.94520000   2.41244905
  0.94520000   2.10048970
  0.94520000   2.41244158
  0.94530000   2.41427240
  0.94530000   2.09834125
  0.94530000   2.41422767
  0.94530000   2.09838374
  0.94530000   2.41419471
  0.94530000   2.09841226
  0.94530000   2.41416942
  0.94530000   2.09843220
  0.94530000   2.41414930
  0.94530000   2.09844674
  0.94530000   2.41413279
  0.94530000   2.09845778
  0.94530000   2.41411890
  0.94530000   2.09846647
  0.94530000   2.41410698
  0.94530000   2.09847354
  0.94530000   2.41409659
  0.94530000   2.09847943
  0.94530000   2.41408742
  0.94530000   2.09848444
  0.94530000   2.41407923
  0.94530000   2.09848879
  0.94530000   2.41407188
  0.94540000   2.41587465
  0.94540000   2.09637208
  0.94540000   2.41583261
  0.94540000   2.09641068
  0.94540000   2.41580141
  0.94540000   2.09643669
  0.94540000   2.41577728
  0.94540000   2.09645499
  0.94540000   2.41575793
  0.94540000   2.09646846
  0.94540000   2.41574195
  0.94540000   2.09647877
  0.94540000   2.41572843
  0.94540000   2.09648697
  0.94540000   2.41571678
  0.94540000   2.09649368
  0.94540000   2.41570658
  0.94540000   2.09649932
  0.94540000   2.41569756
  0.94540000   2.09650414
  0.94540000   2.41568950
  0.94540000   2.09650833
  0.94540000   2.41568225
  0.94550000   2.41745863
  0.94550000   2.09442132
  0.94550000   2.41741898
  0.94550000   2.09445647
  0.94550000   2.41738932
  0.94550000   2.09448028
  0.94550000   2.41736619
  0.94550000   2.09449716
  0.94550000   2.41734751
  0.94550000   2.09450969
  0.94550000   2.41733199
  0.94550000   2.09451938
  0.94550000   2.41731879
  0.94550000   2.09452715
  0.94550000   2.41730737
  0.94550000   2.09453356
  0.94550000   2.41729736
  0.94550000   2.09453897
  0.94550000   2.41728848
  0.94550000   2.09454362
  0.94550000   2.41728053
  0.94550000   2.09454768
  0.94550000   2.41727337
  0.94560000   2.41902485
  0.94560000   2.09248849
  0.94560000   2.41898731
  0.94560000   2.09252061
  0.94560000   2.41895900
  0.94560000   2.09254249
  0.94560000   2.41893675
  0.94560000   2.09255813
  0.94560000   2.41891865
  0.94560000   2.09256986
  0.94560000   2.41890353
  0.94560000   2.09257901
  0.94560000   2.41889061
  0.94560000   2.09258641
  0.94560000   2.41887940
  0.94560000   2.09259255
  0.94560000   2.41886955
  0.94560000   2.09259776
  0.94560000   2.41886079
  0.94560000   2.09260226
  0.94560000   2.41885295
  0.94560000   2.09260619
  0.94560000   2.41884588
  0.94570000   2.42057380
  0.94570000   2.09057317
  0.94570000   2.42053812
  0.94570000   2.09060261
  0.94570000   2.42051099
  0.94570000   2.09062280
  0.94570000   2.42048951
  0.94570000   2.09063737
  0.94570000   2.42047192
  0.94570000   2.09064840
  0.94570000   2.42045715
  0.94570000   2.09065708
  0.94570000   2.42044448
  0.94570000   2.09066415
  0.94570000   2.42043346
  0.94570000   2.09067005
  0.94570000   2.42042375
  0.94570000   2.09067509
  0.94570000   2.42041511
  0.94570000   2.09067944
  0.94570000   2.42040736
  0.94570000   2.09068327
  0.94570000   2.42040037
  0.94580000   2.42210595
  0.94580000   2.08867492
  0.94580000   2.42207191
  0.94580000   2.08870200
  0.94580000   2.42204582
  0.94580000   2.08872071
  0.94580000   2.42202501
  0.94580000   2.08873435
  0.94580000   2.42200787
  0.94580000   2.08874477
  0.94580000   2.42199340
  0.94580000   2.08875304
  0.94580000   2.42198096
  0.94580000   2.08875982
  0.94580000   2.42197011
  0.94580000   2.08876552
  0.94580000   2.42196053
  0.94580000   2.08877039
  0.94580000   2.42195200
  0.94580000   2.08877462
  0.94580000   2.42194434
  0.94580000   2.08877834
  0.94580000   2.42193742
  0.94590000   2.42362176
  0.94590000   2.08679334
  0.94590000   2.42358917
  0.94590000   2.08681833
  0.94590000   2.42356399
  0.94590000   2.08683575
  0.94590000   2.42354377
  0.94590000   2.08684858
  0.94590000   2.42352702
  0.94590000   2.08685846
  0.94590000   2.42351283
  0.94590000   2.08686638
  0.94590000   2.42350059
  0.94590000   2.08687290
  0.94590000   2.42348989
  0.94590000   2.08687840
  0.94590000   2.42348043
  0.94590000   2.08688313
  0.94590000   2.42347200
  0.94590000   2.08688724
  0.94590000   2.42346443
  0.94590000   2.08689086
  0.94590000   2.42345758
  0.94600000   2.42512167
  0.94600000   2.08492800
  0.94600000   2.42509036
  0.94600000   2.08495115
  0.94600000   2.42506598
  0.94600000   2.08496745
  0.94600000   2.42504628
  0.94600000   2.08497956
  0.94600000   2.42502988
  0.94600000   2.08498898
  0.94600000   2.42501593
  0.94600000   2.08499658
  0.94600000   2.42500388
  0.94600000   2.08500287
  0.94600000   2.42499332
  0.94600000   2.08500820
  0.94600000   2.42498397
  0.94600000   2.08501280
  0.94600000   2.42497563
  0.94600000   2.08501680
  0.94600000   2.42496814
  0.94600000   2.08502033
  0.94600000   2.42496136
  0.94610000   2.42660610
  0.94610000   2.08307851
  0.94610000   2.42657593
  0.94610000   2.08310005
  0.94610000   2.42655226
  0.94610000   2.08311536
  0.94610000   2.42653301
  0.94610000   2.08312685
  0.94610000   2.42651692
  0.94610000   2.08313586
  0.94610000   2.42650320
  0.94610000   2.08314317
  0.94610000   2.42649131
  0.94610000   2.08314926
  0.94610000   2.42648088
  0.94610000   2.08315443
  0.94610000   2.42647163
  0.94610000   2.08315890
  0.94610000   2.42646338
  0.94610000   2.08316281
  0.94610000   2.42645596
  0.94610000   2.08316625
  0.94610000   2.42644925
  0.94620000   2.42807548
  0.94620000   2.08124450
  0.94620000   2.42804631
  0.94620000   2.08126461
  0.94620000   2.42802326
  0.94620000   2.08127906
  0.94620000   2.42800442
  0.94620000   2.08129000
  0.94620000   2.42798861
  0.94620000   2.08129864
  0.94620000   2.42797508
  0.94620000   2.08130569
  0.94620000   2.42796334
  0.94620000   2.08131160
  0.94620000   2.42795303
  0.94620000   2.08131663
  0.94620000   2.42794389
  0.94620000   2.08132098
  0.94620000   2.42793572
  0.94620000   2.08132479
  0.94620000   2.42792837
  0.94620000   2.08132816
  0.94620000   2.42792172
  0.94630000   2.42953019
  0.94630000   2.07942558
  0.94630000   2.42950190
  0.94630000   2.07944444
  0.94630000   2.42947941
  0.94630000   2.07945812
  0.94630000   2.42946093
  0.94630000   2.07946857
  0.94630000   2.42944537
  0.94630000   2.07947689
  0.94630000   2.42943203
  0.94630000   2.07948372
  0.94630000   2.42942043
  0.94630000   2.07948945
  0.94630000   2.42941023
  0.94630000   2.07949435
  0.94630000   2.42940118
  0.94630000   2.07949860
  0.94630000   2.42939309
  0.94630000   2.07950232
  0.94630000   2.42938581
  0.94630000   2.07950561
  0.94630000   2.42937922
  0.94640000   2.43097063
  0.94640000   2.07762139
  0.94640000   2.43094312
  0.94640000   2.07763915
  0.94640000   2.43092112
  0.94640000   2.07765215
  0.94640000   2.43090297
  0.94640000   2.07766218
  0.94640000   2.43088763
  0.94640000   2.07767020
  0.94640000   2.43087446
  0.94640000   2.07767682
  0.94640000   2.43086299
  0.94640000   2.07768240
  0.94640000   2.43085289
  0.94640000   2.07768718
  0.94640000   2.43084393
  0.94640000   2.07769132
  0.94640000   2.43083591
  0.94640000   2.07769496
  0.94640000   2.43082870
  0.94640000   2.07769818
  0.94640000   2.43082217
  0.94650000   2.43239715
  0.94650000   2.07583159
  0.94650000   2.43237034
  0.94650000   2.07584836
  0.94650000   2.43234878
  0.94650000   2.07586078
  0.94650000   2.43233092
  0.94650000   2.07587042
  0.94650000   2.43231579
  0.94650000   2.07587818
  0.94650000   2.43230277
  0.94650000   2.07588461
  0.94650000   2.43229143
  0.94650000   2.07589004
  0.94650000   2.43228143
  0.94650000   2.07589470
  0.94650000   2.43227255
  0.94650000   2.07589876
  0.94650000   2.43226461
  0.94650000   2.07590231
  0.94650000   2.43225745
  0.94650000   2.07590546
  0.94650000   2.43225097
  0.94660000   2.43381013
  0.94660000   2.07405582
  0.94660000   2.43378394
  0.94660000   2.07407173
  0.94660000   2.43376277
  0.94660000   2.07408362
  0.94660000   2.43374517
  0.94660000   2.07409291
  0.94660000   2.43373023
  0.94660000   2.07410044
  0.94660000   2.43371736
  0.94660000   2.07410669
  0.94660000   2.43370613
  0.94660000   2.07411199
  0.94660000   2.43369622
  0.94660000   2.07411655
  0.94660000   2.43368742
  0.94660000   2.07412051
  0.94660000   2.43367955
  0.94660000   2.07412399
  0.94660000   2.43367245
  0.94660000   2.07412707
  0.94660000   2.43366602
  0.94670000   2.43520989
  0.94670000   2.07229376
  0.94670000   2.43518426
  0.94670000   2.07230891
  0.94670000   2.43516344
  0.94670000   2.07232032
  0.94670000   2.43514608
  0.94670000   2.07232931
  0.94670000   2.43513132
  0.94670000   2.07233662
  0.94670000   2.43511858
  0.94670000   2.07234271
  0.94670000   2.43510746
  0.94670000   2.07234788
  0.94670000   2.43509765
  0.94670000   2.07235234
  0.94670000   2.43508892
  0.94670000   2.07235621
  0.94670000   2.43508111
  0.94670000   2.07235962
  0.94670000   2.43507407
  0.94670000   2.07236264
  0.94670000   2.43506770
  0.94680000   2.43659678
  0.94680000   2.07054509
  0.94680000   2.43657164
  0.94680000   2.07055956
  0.94680000   2.43655115
  0.94680000   2.07057055
  0.94680000   2.43653401
  0.94680000   2.07057925
  0.94680000   2.43651941
  0.94680000   2.07058636
  0.94680000   2.43650680
  0.94680000   2.07059231
  0.94680000   2.43649578
  0.94680000   2.07059736
  0.94680000   2.43648605
  0.94680000   2.07060172
  0.94680000   2.43647740
  0.94680000   2.07060551
  0.94680000   2.43646965
  0.94680000   2.07060885
  0.94680000   2.43646267
  0.94680000   2.07061181
  0.94680000   2.43645634
  0.94690000   2.43797112
  0.94690000   2.06880949
  0.94690000   2.43794642
  0.94690000   2.06882336
  0.94690000   2.43792622
  0.94690000   2.06883397
  0.94690000   2.43790929
  0.94690000   2.06884242
  0.94690000   2.43789484
  0.94690000   2.06884935
  0.94690000   2.43788235
  0.94690000   2.06885515
  0.94690000   2.43787143
  0.94690000   2.06886009
  0.94690000   2.43786178
  0.94690000   2.06886436
  0.94690000   2.43785320
  0.94690000   2.06886808
  0.94690000   2.43784551
  0.94690000   2.06887135
  0.94690000   2.43783858
  0.94690000   2.06887425
  0.94690000   2.43783230
  0.94700000   2.43933321
  0.94700000   2.06708667
  0.94700000   2.43930892
  0.94700000   2.06710000
  0.94700000   2.43928898
  0.94700000   2.06711027
  0.94700000   2.43927224
  0.94700000   2.06711849
  0.94700000   2.43925794
  0.94700000   2.06712524
  0.94700000   2.43924556
  0.94700000   2.06713091
  0.94700000   2.43923473
  0.94700000   2.06713575
  0.94700000   2.43922516
  0.94700000   2.06713993
  0.94700000   2.43921664
  0.94700000   2.06714357
  0.94700000   2.43920901
  0.94700000   2.06714678
  0.94700000   2.43920214
  0.94700000   2.06714963
  0.94700000   2.43919590
  0.94710000   2.44068335
  0.94710000   2.06537635
  0.94710000   2.44065943
  0.94710000   2.06538919
  0.94710000   2.44063974
  0.94710000   2.06539914
  0.94710000   2.44062317
  0.94710000   2.06540714
  0.94710000   2.44060900
  0.94710000   2.06541374
  0.94710000   2.44059673
  0.94710000   2.06541929
  0.94710000   2.44058599
  0.94710000   2.06542403
  0.94710000   2.44057650
  0.94710000   2.06542812
  0.94710000   2.44056805
  0.94710000   2.06543169
  0.94710000   2.44056047
  0.94710000   2.06543484
  0.94710000   2.44055364
  0.94710000   2.06543764
  0.94710000   2.44054746
  0.94720000   2.44202184
  0.94720000   2.06367822
  0.94720000   2.44199825
  0.94720000   2.06369063
  0.94720000   2.44197878
  0.94720000   2.06370030
  0.94720000   2.44196238
  0.94720000   2.06370810
  0.94720000   2.44194834
  0.94720000   2.06371455
  0.94720000   2.44193618
  0.94720000   2.06371998
  0.94720000   2.44192552
  0.94720000   2.06372462
  0.94720000   2.44191610
  0.94720000   2.06372863
  0.94720000   2.44190771
  0.94720000   2.06373214
  0.94720000   2.44190019
  0.94720000   2.06373523
  0.94720000   2.44189341
  0.94720000   2.06373798
  0.94720000   2.44188726
  0.94730000   2.44334895
  0.94730000   2.06199204
  0.94730000   2.44332566
  0.94730000   2.06200404
  0.94730000   2.44330641
  0.94730000   2.06201346
  0.94730000   2.44329016
  0.94730000   2.06202107
  0.94730000   2.44327625
  0.94730000   2.06202738
  0.94730000   2.44326417
  0.94730000   2.06203270
  0.94730000   2.44325360
  0.94730000   2.06203725
  0.94730000   2.44324425
  0.94730000   2.06204118
  0.94730000   2.44323592
  0.94730000   2.06204463
  0.94730000   2.44322845
  0.94730000   2.06204766
  0.94730000   2.44322172
  0.94730000   2.06205036
  0.94730000   2.44321561
  0.94740000   2.44466494
  0.94740000   2.06031752
  0.94740000   2.44464194
  0.94740000   2.06032917
  0.94740000   2.44462288
  0.94740000   2.06033834
  0.94740000   2.44460678
  0.94740000   2.06034578
  0.94740000   2.44459298
  0.94740000   2.06035196
  0.94740000   2.44458101
  0.94740000   2.06035717
  0.94740000   2.44457051
  0.94740000   2.06036163
  0.94740000   2.44456123
  0.94740000   2.06036549
  0.94740000   2.44455296
  0.94740000   2.06036887
  0.94740000   2.44454554
  0.94740000   2.06037186
  0.94740000   2.44453885
  0.94740000   2.06037450
  0.94740000   2.44453279
  0.94750000   2.44597009
  0.94750000   2.05865443
  0.94750000   2.44594734
  0.94750000   2.05866575
  0.94750000   2.44592847
  0.94750000   2.05867469
  0.94750000   2.44591251
  0.94750000   2.05868197
  0.94750000   2.44589882
  0.94750000   2.05868802
  0.94750000   2.44588694
  0.94750000   2.05869313
  0.94750000   2.44587652
  0.94750000   2.05869751
  0.94750000   2.44586730
  0.94750000   2.05870130
  0.94750000   2.44585909
  0.94750000   2.05870462
  0.94750000   2.44585172
  0.94750000   2.05870755
  0.94750000   2.44584507
  0.94750000   2.05871015
  0.94750000   2.44583905
  0.94760000   2.44726463
  0.94760000   2.05700251
  0.94760000   2.44724213
  0.94760000   2.05701352
  0.94760000   2.44722343
  0.94760000   2.05702226
  0.94760000   2.44720760
  0.94760000   2.05702938
  0.94760000   2.44719402
  0.94760000   2.05703531
  0.94760000   2.44718222
  0.94760000   2.05704032
  0.94760000   2.44717187
  0.94760000   2.05704462
  0.94760000   2.44716272
  0.94760000   2.05704835
  0.94760000   2.44715456
  0.94760000   2.05705161
  0.94760000   2.44714724
  0.94760000   2.05705448
  0.94760000   2.44714064
  0.94760000   2.05705704
  0.94760000   2.44713465
  0.94770000   2.44854881
  0.94770000   2.05536152
  0.94770000   2.44852654
  0.94770000   2.05537226
  0.94770000   2.44850800
  0.94770000   2.05538080
  0.94770000   2.44849230
  0.94770000   2.05538777
  0.94770000   2.44847882
  0.94770000   2.05539359
  0.94770000   2.44846711
  0.94770000   2.05539851
  0.94770000   2.44845683
  0.94770000   2.05540273
  0.94770000   2.44844774
  0.94770000   2.05540639
  0.94770000   2.44843964
  0.94770000   2.05540959
  0.94770000   2.44843236
  0.94770000   2.05541242
  0.94770000   2.44842580
  0.94770000   2.05541493
  0.94770000   2.44841985
  0.94780000   2.44982287
  0.94780000   2.05373123
  0.94780000   2.44980081
  0.94780000   2.05374171
  0.94780000   2.44978243
  0.94780000   2.05375007
  0.94780000   2.44976685
  0.94780000   2.05375691
  0.94780000   2.44975347
  0.94780000   2.05376261
  0.94780000   2.44974183
  0.94780000   2.05376744
  0.94780000   2.44973163
  0.94780000   2.05377159
  0.94780000   2.44972259
  0.94780000   2.05377519
  0.94780000   2.44971454
  0.94780000   2.05377834
  0.94780000   2.44970732
  0.94780000   2.05378112
  0.94780000   2.44970079
  0.94780000   2.05378359
  0.94780000   2.44969488
  0.94790000   2.45108702
  0.94790000   2.05211144
  0.94790000   2.45106516
  0.94790000   2.05212167
  0.94790000   2.45104693
  0.94790000   2.05212986
  0.94790000   2.45103147
  0.94790000   2.05213656
  0.94790000   2.45101818
  0.94790000   2.05214216
  0.94790000   2.45100663
  0.94790000   2.05214691
  0.94790000   2.45099649
  0.94790000   2.05215098
  0.94790000   2.45098751
  0.94790000   2.05215451
  0.94790000   2.45097951
  0.94790000   2.05215761
  0.94790000   2.45097233
  0.94790000   2.05216035
  0.94790000   2.45096585
  0.94790000   2.05216278
  0.94790000   2.45095997
  0.94800000   2.45234149
  0.94800000   2.05050191
  0.94800000   2.45231982
  0.94800000   2.05051192
  0.94800000   2.45230173
  0.94800000   2.05051994
  0.94800000   2.45228639
  0.94800000   2.05052651
  0.94800000   2.45227319
  0.94800000   2.05053201
  0.94800000   2.45226171
  0.94800000   2.05053667
  0.94800000   2.45225164
  0.94800000   2.05054068
  0.94800000   2.45224272
  0.94800000   2.05054415
  0.94800000   2.45223477
  0.94800000   2.05054720
  0.94800000   2.45222763
  0.94800000   2.05054989
  0.94800000   2.45222118
  0.94800000   2.05055229
  0.94800000   2.45221533
  0.94810000   2.45358649
  0.94810000   2.04890244
  0.94810000   2.45356500
  0.94810000   2.04891223
  0.94810000   2.45354705
  0.94810000   2.04892010
  0.94810000   2.45353181
  0.94810000   2.04892655
  0.94810000   2.45351870
  0.94810000   2.04893195
  0.94810000   2.45350730
  0.94810000   2.04893654
  0.94810000   2.45349729
  0.94810000   2.04894047
  0.94810000   2.45348843
  0.94810000   2.04894389
  0.94810000   2.45348052
  0.94810000   2.04894689
  0.94810000   2.45347342
  0.94810000   2.04894954
  0.94810000   2.45346701
  0.94810000   2.04895190
  0.94810000   2.45346120
  0.94820000   2.45482222
  0.94820000   2.04731283
  0.94820000   2.45480090
  0.94820000   2.04732242
  0.94820000   2.45478308
  0.94820000   2.04733013
  0.94820000   2.45476795
  0.94820000   2.04733648
  0.94820000   2.45475493
  0.94820000   2.04734178
  0.94820000   2.45474360
  0.94820000   2.04734629
  0.94820000   2.45473365
  0.94820000   2.04735016
  0.94820000   2.45472484
  0.94820000   2.04735352
  0.94820000   2.45471698
  0.94820000   2.04735647
  0.94820000   2.45470992
  0.94820000   2.04735908
  0.94820000   2.45470355
  0.94820000   2.04736140
  0.94820000   2.45469777
  0.94830000   2.45604888
  0.94830000   2.04573288
  0.94830000   2.45602773
  0.94830000   2.04574229
  0.94830000   2.45601003
  0.94830000   2.04574986
  0.94830000   2.45599500
  0.94830000   2.04575609
  0.94830000   2.45598206
  0.94830000   2.04576130
  0.94830000   2.45597080
  0.94830000   2.04576573
  0.94830000   2.45596091
  0.94830000   2.04576954
  0.94830000   2.45595215
  0.94830000   2.04577285
  0.94830000   2.45594434
  0.94830000   2.04577575
  0.94830000   2.45593732
  0.94830000   2.04577832
  0.94830000   2.45593098
  0.94830000   2.04578061
  0.94830000   2.45592523
  0.94840000   2.45726666
  0.94840000   2.04416241
  0.94840000   2.45724566
  0.94840000   2.04417163
  0.94840000   2.45722809
  0.94840000   2.04417907
  0.94840000   2.45721316
  0.94840000   2.04418519
  0.94840000   2.45720030
  0.94840000   2.04419032
  0.94840000   2.45718911
  0.94840000   2.04419468
  0.94840000   2.45717928
  0.94840000   2.04419843
  0.94840000   2.45717057
  0.94840000   2.04420168
  0.94840000   2.45716280
  0.94840000   2.04420454
  0.94840000   2.45715582
  0.94840000   2.04420707
  0.94840000   2.45714951
  0.94840000   2.04420932
  0.94840000   2.45714380
  0.94850000   2.45847574
  0.94850000   2.04260124
  0.94850000   2.45845489
  0.94850000   2.04261029
  0.94850000   2.45843744
  0.94850000   2.04261759
  0.94850000   2.45842260
  0.94850000   2.04262361
  0.94850000   2.45840983
  0.94850000   2.04262865
  0.94850000   2.45839870
  0.94850000   2.04263294
  0.94850000   2.45838893
  0.94850000   2.04263663
  0.94850000   2.45838027
  0.94850000   2.04263984
  0.94850000   2.45837254
  0.94850000   2.04264265
  0.94850000   2.45836559
  0.94850000   2.04264514
  0.94850000   2.45835933
  0.94850000   2.04264736
  0.94850000   2.45835364
  0.94860000   2.45967630
  0.94860000   2.04104918
  0.94860000   2.45965560
  0.94860000   2.04105806
  0.94860000   2.45963827
  0.94860000   2.04106524
  0.94860000   2.45962352
  0.94860000   2.04107116
  0.94860000   2.45961082
  0.94860000   2.04107612
  0.94860000   2.45959976
  0.94860000   2.04108034
  0.94860000   2.45959004
  0.94860000   2.04108397
  0.94860000   2.45958143
  0.94860000   2.04108713
  0.94860000   2.45957374
  0.94860000   2.04108991
  0.94860000   2.45956683
  0.94860000   2.04109236
  0.94860000   2.45956060
  0.94860000   2.04109454
  0.94860000   2.45955494
  0.94870000   2.46086852
  0.94870000   2.03950607
  0.94870000   2.46084797
  0.94870000   2.03951479
  0.94870000   2.46083074
  0.94870000   2.03952185
  0.94870000   2.46081608
  0.94870000   2.03952767
  0.94870000   2.46080345
  0.94870000   2.03953255
  0.94870000   2.46079246
  0.94870000   2.03953671
  0.94870000   2.46078279
  0.94870000   2.03954028
  0.94870000   2.46077423
  0.94870000   2.03954339
  0.94870000   2.46076658
  0.94870000   2.03954613
  0.94870000   2.46075971
  0.94870000   2.03954854
  0.94870000   2.46075351
  0.94870000   2.03955070
  0.94870000   2.46074788
  0.94880000   2.46205257
  0.94880000   2.03797174
  0.94880000   2.46203214
  0.94880000   2.03798031
  0.94880000   2.46201502
  0.94880000   2.03798725
  0.94880000   2.46200046
  0.94880000   2.03799297
  0.94880000   2.46198790
  0.94880000   2.03799778
  0.94880000   2.46197697
  0.94880000   2.03800187
  0.94880000   2.46196735
  0.94880000   2.03800540
  0.94880000   2.46195883
  0.94880000   2.03800846
  0.94880000   2.46195123
  0.94880000   2.03801115
  0.94880000   2.46194439
  0.94880000   2.03801353
  0.94880000   2.46193822
  0.94880000   2.03801566
  0.94880000   2.46193262
  0.94890000   2.46322859
  0.94890000   2.03644603
  0.94890000   2.46320830
  0.94890000   2.03645445
  0.94890000   2.46319129
  0.94890000   2.03646128
  0.94890000   2.46317681
  0.94890000   2.03646691
  0.94890000   2.46316432
  0.94890000   2.03647164
  0.94890000   2.46315345
  0.94890000   2.03647567
  0.94890000   2.46314389
  0.94890000   2.03647915
  0.94890000   2.46313541
  0.94890000   2.03648217
  0.94890000   2.46312784
  0.94890000   2.03648482
  0.94890000   2.46312104
  0.94890000   2.03648717
  0.94890000   2.46311490
  0.94890000   2.03648926
  0.94890000   2.46310932
  0.94900000   2.46439676
  0.94900000   2.03492878
  0.94900000   2.46437660
  0.94900000   2.03493706
  0.94900000   2.46435969
  0.94900000   2.03494378
  0.94900000   2.46434529
  0.94900000   2.03494933
  0.94900000   2.46433288
  0.94900000   2.03495399
  0.94900000   2.46432206
  0.94900000   2.03495796
  0.94900000   2.46431255
  0.94900000   2.03496138
  0.94900000   2.46430411
  0.94900000   2.03496435
  0.94900000   2.46429659
  0.94900000   2.03496697
  0.94900000   2.46428982
  0.94900000   2.03496929
  0.94900000   2.46428371
  0.94900000   2.03497135
  0.94900000   2.46427816
  0.94910000   2.46555723
  0.94910000   2.03341985
  0.94910000   2.46553719
  0.94910000   2.03342800
  0.94910000   2.46552038
  0.94910000   2.03343460
  0.94910000   2.46550606
  0.94910000   2.03344007
  0.94910000   2.46549372
  0.94910000   2.03344466
  0.94910000   2.46548296
  0.94910000   2.03344857
  0.94910000   2.46547349
  0.94910000   2.03345194
  0.94910000   2.46546510
  0.94910000   2.03345487
  0.94910000   2.46545761
  0.94910000   2.03345745
  0.94910000   2.46545088
  0.94910000   2.03345974
  0.94910000   2.46544480
  0.94910000   2.03346177
  0.94910000   2.46543927
  0.94920000   2.46671014
  0.94920000   2.03191908
  0.94920000   2.46669022
  0.94920000   2.03192710
  0.94920000   2.46667351
  0.94920000   2.03193360
  0.94920000   2.46665927
  0.94920000   2.03193898
  0.94920000   2.46664699
  0.94920000   2.03194350
  0.94920000   2.46663628
  0.94920000   2.03194736
  0.94920000   2.46662687
  0.94920000   2.03195068
  0.94920000   2.46661852
  0.94920000   2.03195358
  0.94920000   2.46661106
  0.94920000   2.03195612
  0.94920000   2.46660436
  0.94920000   2.03195837
  0.94920000   2.46659831
  0.94920000   2.03196038
  0.94920000   2.46659281
  0.94930000   2.46785564
  0.94930000   2.03042634
  0.94930000   2.46783584
  0.94930000   2.03043423
  0.94930000   2.46781922
  0.94930000   2.03044063
  0.94930000   2.46780506
  0.94930000   2.03044593
  0.94930000   2.46779284
  0.94930000   2.03045039
  0.94930000   2.46778219
  0.94930000   2.03045419
  0.94930000   2.46777282
  0.94930000   2.03045747
  0.94930000   2.46776451
  0.94930000   2.03046032
  0.94930000   2.46775709
  0.94930000   2.03046283
  0.94930000   2.46775043
  0.94930000   2.03046505
  0.94930000   2.46774440
  0.94930000   2.03046703
  0.94930000   2.46773893
  0.94940000   2.46899386
  0.94940000   2.02894149
  0.94940000   2.46897418
  0.94940000   2.02894925
  0.94940000   2.46895765
  0.94940000   2.02895556
  0.94940000   2.46894356
  0.94940000   2.02896078
  0.94940000   2.46893141
  0.94940000   2.02896518
  0.94940000   2.46892082
  0.94940000   2.02896892
  0.94940000   2.46891149
  0.94940000   2.02897215
  0.94940000   2.46890322
  0.94940000   2.02897497
  0.94940000   2.46889584
  0.94940000   2.02897744
  0.94940000   2.46888920
  0.94940000   2.02897963
  0.94940000   2.46888320
  0.94940000   2.02898159
  0.94940000   2.46887775
  0.94950000   2.47012495
  0.94950000   2.02746439
  0.94950000   2.47010538
  0.94950000   2.02747203
  0.94950000   2.47008894
  0.94950000   2.02747825
  0.94950000   2.47007493
  0.94950000   2.02748339
  0.94950000   2.47006283
  0.94950000   2.02748772
  0.94950000   2.47005229
  0.94950000   2.02749142
  0.94950000   2.47004301
  0.94950000   2.02749461
  0.94950000   2.47003478
  0.94950000   2.02749738
  0.94950000   2.47002743
  0.94950000   2.02749982
  0.94950000   2.47002083
  0.94950000   2.02750199
  0.94950000   2.47001485
  0.94950000   2.02750391
  0.94950000   2.47000943
  0.94960000   2.47124903
  0.94960000   2.02599491
  0.94960000   2.47122957
  0.94960000   2.02600244
  0.94960000   2.47121322
  0.94960000   2.02600856
  0.94960000   2.47119928
  0.94960000   2.02601364
  0.94960000   2.47118725
  0.94960000   2.02601791
  0.94960000   2.47117675
  0.94960000   2.02602155
  0.94960000   2.47116752
  0.94960000   2.02602469
  0.94960000   2.47115933
  0.94960000   2.02602743
  0.94960000   2.47115201
  0.94960000   2.02602984
  0.94960000   2.47114543
  0.94960000   2.02603198
  0.94960000   2.47113949
  0.94960000   2.02603388
  0.94960000   2.47113409
  0.94970000   2.47236624
  0.94970000   2.02453294
  0.94970000   2.47234688
  0.94970000   2.02454035
  0.94970000   2.47233061
  0.94970000   2.02454638
  0.94970000   2.47231674
  0.94970000   2.02455138
  0.94970000   2.47230477
  0.94970000   2.02455560
  0.94970000   2.47229433
  0.94970000   2.02455919
  0.94970000   2.47228514
  0.94970000   2.02456229
  0.94970000   2.47227699
  0.94970000   2.02456499
  0.94970000   2.47226970
  0.94970000   2.02456737
  0.94970000   2.47226315
  0.94970000   2.02456948
  0.94970000   2.47225723
  0.94970000   2.02457136
  0.94970000   2.47225186
  0.94980000   2.47347669
  0.94980000   2.02307833
  0.94980000   2.47345744
  0.94980000   2.02308564
  0.94980000   2.47344125
  0.94980000   2.02309158
  0.94980000   2.47342745
  0.94980000   2.02309652
  0.94980000   2.47341554
  0.94980000   2.02310067
  0.94980000   2.47340514
  0.94980000   2.02310421
  0.94980000   2.47339599
  0.94980000   2.02310728
  0.94980000   2.47338788
  0.94980000   2.02310995
  0.94980000   2.47338063
  0.94980000   2.02311229
  0.94980000   2.47337411
  0.94980000   2.02311437
  0.94980000   2.47336821
  0.94980000   2.02311623
  0.94980000   2.47336286
  0.94990000   2.47458051
  0.94990000   2.02163098
  0.94990000   2.47456136
  0.94990000   2.02163818
  0.94990000   2.47454525
  0.94990000   2.02164405
  0.94990000   2.47453152
  0.94990000   2.02164891
  0.94990000   2.47451966
  0.94990000   2.02165301
  0.94990000   2.47450932
  0.94990000   2.02165650
  0.94990000   2.47450021
  0.94990000   2.02165953
  0.94990000   2.47449213
  0.94990000   2.02166216
  0.94990000   2.47448491
  0.94990000   2.02166448
  0.94990000   2.47447842
  0.94990000   2.02166653
  0.94990000   2.47447255
  0.94990000   2.02166836
  0.94990000   2.47446722
  0.95000000   2.47567781
  0.95000000   2.02019077
  0.95000000   2.47565876
  0.95000000   2.02019787
  0.95000000   2.47564274
  0.95000000   2.02020365
  0.95000000   2.47562907
  0.95000000   2.02020845
  0.95000000   2.47561727
  0.95000000   2.02021249
  0.95000000   2.47560697
  0.95000000   2.02021594
  0.95000000   2.47559790
  0.95000000   2.02021893
  0.95000000   2.47558986
  0.95000000   2.02022153
  0.95000000   2.47558267
  0.95000000   2.02022381
  0.95000000   2.47557621
  0.95000000   2.02022584
  0.95000000   2.47557036
  0.95000000   2.02022765
  0.95000000   2.47556505
  0.95010000   2.47676871
  0.95010000   2.01875759
  0.95010000   2.47674976
  0.95010000   2.01876459
  0.95010000   2.47673382
  0.95010000   2.01877029
  0.95010000   2.47672021
  0.95010000   2.01877502
  0.95010000   2.47670847
  0.95010000   2.01877901
  0.95010000   2.47669821
  0.95010000   2.01878242
  0.95010000   2.47668919
  0.95010000   2.01878536
  0.95010000   2.47668118
  0.95010000   2.01878793
  0.95010000   2.47667402
  0.95010000   2.01879019
  0.95010000   2.47666758
  0.95010000   2.01879220
  0.95010000   2.47666176
  0.95010000   2.01879398
  0.95010000   2.47665647
  0.95020000   2.47785333
  0.95020000   2.01733132
  0.95020000   2.47783447
  0.95020000   2.01733822
  0.95020000   2.47781860
  0.95020000   2.01734385
  0.95020000   2.47780506
  0.95020000   2.01734852
  0.95020000   2.47779337
  0.95020000   2.01735246
  0.95020000   2.47778316
  0.95020000   2.01735582
  0.95020000   2.47777417
  0.95020000   2.01735873
  0.95020000   2.47776620
  0.95020000   2.01736127
  0.95020000   2.47775907
  0.95020000   2.01736350
  0.95020000   2.47775266
  0.95020000   2.01736548
  0.95020000   2.47774686
  0.95020000   2.01736724
  0.95020000   2.47774159
  0.95030000   2.47893176
  0.95030000   2.01591187
  0.95030000   2.47891299
  0.95030000   2.01591867
  0.95030000   2.47889720
  0.95030000   2.01592422
  0.95030000   2.47888373
  0.95030000   2.01592883
  0.95030000   2.47887208
  0.95030000   2.01593272
  0.95030000   2.47886192
  0.95030000   2.01593604
  0.95030000   2.47885297
  0.95030000   2.01593891
  0.95030000   2.47884503
  0.95030000   2.01594142
  0.95030000   2.47883793
  0.95030000   2.01594362
  0.95030000   2.47883154
  0.95030000   2.01594558
  0.95030000   2.47882577
  0.95030000   2.01594732
  0.95030000   2.47882053
  0.95040000   2.48000412
  0.95040000   2.01449912
  0.95040000   2.47998544
  0.95040000   2.01450583
  0.95040000   2.47996972
  0.95040000   2.01451131
  0.95040000   2.47995631
  0.95040000   2.01451586
  0.95040000   2.47994472
  0.95040000   2.01451970
  0.95040000   2.47993460
  0.95040000   2.01452298
  0.95040000   2.47992569
  0.95040000   2.01452581
  0.95040000   2.47991778
  0.95040000   2.01452829
  0.95040000   2.47991071
  0.95040000   2.01453047
  0.95040000   2.47990435
  0.95040000   2.01453240
  0.95040000   2.47989860
  0.95040000   2.01453412
  0.95040000   2.47989337
  0.95050000   2.48107050
  0.95050000   2.01309298
  0.95050000   2.48105192
  0.95050000   2.01309960
  0.95050000   2.48103627
  0.95050000   2.01310501
  0.95050000   2.48102292
  0.95050000   2.01310950
  0.95050000   2.48101137
  0.95050000   2.01311329
  0.95050000   2.48100130
  0.95050000   2.01311653
  0.95050000   2.48099242
  0.95050000   2.01311933
  0.95050000   2.48098455
  0.95050000   2.01312177
  0.95050000   2.48097750
  0.95050000   2.01312392
  0.95050000   2.48097117
  0.95050000   2.01312583
  0.95050000   2.48096544
  0.95050000   2.01312754
  0.95050000   2.48096024
  0.95060000   2.48213101
  0.95060000   2.01169334
  0.95060000   2.48211252
  0.95060000   2.01169988
  0.95060000   2.48209694
  0.95060000   2.01170521
  0.95060000   2.48208365
  0.95060000   2.01170965
  0.95060000   2.48207215
  0.95060000   2.01171339
  0.95060000   2.48206212
  0.95060000   2.01171659
  0.95060000   2.48205328
  0.95060000   2.01171936
  0.95060000   2.48204544
  0.95060000   2.01172177
  0.95060000   2.48203842
  0.95060000   2.01172390
  0.95060000   2.48203211
  0.95060000   2.01172579
  0.95060000   2.48202641
  0.95060000   2.01172747
  0.95060000   2.48202122
  0.95070000   2.48318575
  0.95070000   2.01030012
  0.95070000   2.48316734
  0.95070000   2.01030657
  0.95070000   2.48315183
  0.95070000   2.01031183
  0.95070000   2.48313859
  0.95070000   2.01031621
  0.95070000   2.48312715
  0.95070000   2.01031991
  0.95070000   2.48311716
  0.95070000   2.01032307
  0.95070000   2.48310836
  0.95070000   2.01032581
  0.95070000   2.48310054
  0.95070000   2.01032819
  0.95070000   2.48309356
  0.95070000   2.01033030
  0.95070000   2.48308727
  0.95070000   2.01033216
  0.95070000   2.48308159
  0.95070000   2.01033382
  0.95070000   2.48307642
  0.95080000   2.48423480
  0.95080000   2.00891321
  0.95080000   2.48421648
  0.95080000   2.00891958
  0.95080000   2.48420105
  0.95080000   2.00892478
  0.95080000   2.48418786
  0.95080000   2.00892910
  0.95080000   2.48417647
  0.95080000   2.00893276
  0.95080000   2.48416652
  0.95080000   2.00893588
  0.95080000   2.48415775
  0.95080000   2.00893858
  0.95080000   2.48414996
  0.95080000   2.00894094
  0.95080000   2.48414300
  0.95080000   2.00894302
  0.95080000   2.48413674
  0.95080000   2.00894486
  0.95080000   2.48413108
  0.95080000   2.00894651
  0.95080000   2.48412594
  0.95090000   2.48527828
  0.95090000   2.00753253
  0.95090000   2.48526003
  0.95090000   2.00753882
  0.95090000   2.48524467
  0.95090000   2.00754395
  0.95090000   2.48523154
  0.95090000   2.00754822
  0.95090000   2.48522019
  0.95090000   2.00755183
  0.95090000   2.48521028
  0.95090000   2.00755492
  0.95090000   2.48520155
  0.95090000   2.00755759
  0.95090000   2.48519379
  0.95090000   2.00755992
  0.95090000   2.48518686
  0.95090000   2.00756197
  0.95090000   2.48518062
  0.95090000   2.00756380
  0.95090000   2.48517498
  0.95090000   2.00756543
  0.95090000   2.48516985
  0.95100000   2.48631625
  0.95100000   2.00615799
  0.95100000   2.48629809
  0.95100000   2.00616419
  0.95100000   2.48628279
  0.95100000   2.00616927
  0.95100000   2.48626971
  0.95100000   2.00617349
  0.95100000   2.48625841
  0.95100000   2.00617705
  0.95100000   2.48624854
  0.95100000   2.00618010
  0.95100000   2.48623984
  0.95100000   2.00618274
  0.95100000   2.48623212
  0.95100000   2.00618505
  0.95100000   2.48622521
  0.95100000   2.00618708
  0.95100000   2.48621900
  0.95100000   2.00618888
  0.95100000   2.48621338
  0.95100000   2.00619049
  0.95100000   2.48620827
  0.95110000   2.48734881
  0.95110000   2.00478950
  0.95110000   2.48733073
  0.95110000   2.00479563
  0.95110000   2.48731550
  0.95110000   2.00480064
  0.95110000   2.48730248
  0.95110000   2.00480481
  0.95110000   2.48729122
  0.95110000   2.00480833
  0.95110000   2.48728139
  0.95110000   2.00481134
  0.95110000   2.48727272
  0.95110000   2.00481395
  0.95110000   2.48726503
  0.95110000   2.00481623
  0.95110000   2.48725815
  0.95110000   2.00481824
  0.95110000   2.48725196
  0.95110000   2.00482002
  0.95110000   2.48724636
  0.95110000   2.00482162
  0.95110000   2.48724127
  0.95120000   2.48837606
  0.95120000   2.00342697
  0.95120000   2.48835805
  0.95120000   2.00343302
  0.95120000   2.48834288
  0.95120000   2.00343797
  0.95120000   2.48832992
  0.95120000   2.00344210
  0.95120000   2.48831870
  0.95120000   2.00344558
  0.95120000   2.48830891
  0.95120000   2.00344856
  0.95120000   2.48830028
  0.95120000   2.00345114
  0.95120000   2.48829261
  0.95120000   2.00345339
  0.95120000   2.48828576
  0.95120000   2.00345538
  0.95120000   2.48827959
  0.95120000   2.00345714
  0.95120000   2.48827401
  0.95120000   2.00345871
  0.95120000   2.48826893
  0.95130000   2.48939806
  0.95130000   2.00207033
  0.95130000   2.48938014
  0.95130000   2.00207631
  0.95130000   2.48936503
  0.95130000   2.00208120
  0.95130000   2.48935211
  0.95130000   2.00208527
  0.95130000   2.48934095
  0.95130000   2.00208872
  0.95130000   2.48933119
  0.95130000   2.00209167
  0.95130000   2.48932259
  0.95130000   2.00209421
  0.95130000   2.48931495
  0.95130000   2.00209644
  0.95130000   2.48930812
  0.95130000   2.00209841
  0.95130000   2.48930197
  0.95130000   2.00210015
  0.95130000   2.48929642
  0.95130000   2.00210171
  0.95130000   2.48929136
  0.95140000   2.49041491
  0.95140000   2.00071950
  0.95140000   2.49039706
  0.95140000   2.00072540
  0.95140000   2.49038202
  0.95140000   2.00073024
  0.95140000   2.49036915
  0.95140000   2.00073426
  0.95140000   2.49035803
  0.95140000   2.00073766
  0.95140000   2.49034831
  0.95140000   2.00074058
  0.95140000   2.49033974
  0.95140000   2.00074310
  0.95140000   2.49033213
  0.95140000   2.00074531
  0.95140000   2.49032532
  0.95140000   2.00074725
  0.95140000   2.49031920
  0.95140000   2.00074897
  0.95140000   2.49031366
  0.95140000   2.00075051
  0.95140000   2.49030862
  0.95150000   2.49142669
  0.95150000   1.99937439
  0.95150000   2.49140891
  0.95150000   1.99938022
  0.95150000   2.49139393
  0.95150000   1.99938500
  0.95150000   2.49138111
  0.95150000   1.99938898
  0.95150000   2.49137003
  0.95150000   1.99939234
  0.95150000   2.49136035
  0.95150000   1.99939523
  0.95150000   2.49135181
  0.95150000   1.99939772
  0.95150000   2.49134423
  0.95150000   1.99939990
  0.95150000   2.49133745
  0.95150000   1.99940182
  0.95150000   2.49133134
  0.95150000   1.99940353
  0.95150000   2.49132582
  0.95150000   1.99940505
  0.95150000   2.49132080
  0.95160000   2.49243346
  0.95160000   1.99803493
  0.95160000   2.49241576
  0.95160000   1.99804069
  0.95160000   2.49240083
  0.95160000   1.99804541
  0.95160000   2.49238807
  0.95160000   1.99804935
  0.95160000   2.49237703
  0.95160000   1.99805268
  0.95160000   2.49236738
  0.95160000   1.99805553
  0.95160000   2.49235888
  0.95160000   1.99805799
  0.95160000   2.49235132
  0.95160000   1.99806015
  0.95160000   2.49234456
  0.95160000   1.99806205
  0.95160000   2.49233848
  0.95160000   1.99806374
  0.95160000   2.49233298
  0.95160000   1.99806525
  0.95160000   2.49232798
  0.95170000   2.49343532
  0.95170000   1.99670104
  0.95170000   2.49341769
  0.95170000   1.99670674
  0.95170000   2.49340282
  0.95170000   1.99671140
  0.95170000   2.49339011
  0.95170000   1.99671530
  0.95170000   2.49337911
  0.95170000   1.99671859
  0.95170000   2.49336950
  0.95170000   1.99672140
  0.95170000   2.49336102
  0.95170000   1.99672384
  0.95170000   2.49335349
  0.95170000   1.99672598
  0.95170000   2.49334676
  0.95170000   1.99672786
  0.95170000   2.49334070
  0.95170000   1.99672953
  0.95170000   2.49333522
  0.95170000   1.99673102
  0.95170000   2.49333023
  0.95180000   2.49443233
  0.95180000   1.99537266
  0.95180000   2.49441477
  0.95180000   1.99537829
  0.95180000   2.49439996
  0.95180000   1.99538290
  0.95180000   2.49438729
  0.95180000   1.99538675
  0.95180000   2.49437634
  0.95180000   1.99539000
  0.95180000   2.49436676
  0.95180000   1.99539279
  0.95180000   2.49435832
  0.95180000   1.99539520
  0.95180000   2.49435081
  0.95180000   1.99539731
  0.95180000   2.49434410
  0.95180000   1.99539918
  0.95180000   2.49433806
  0.95180000   1.99540083
  0.95180000   2.49433260
  0.95180000   1.99540231
  0.95180000   2.49432763
  0.95190000   2.49542457
  0.95190000   1.99404970
  0.95190000   2.49540708
  0.95190000   1.99405526
  0.95190000   2.49539233
  0.95190000   1.99405983
  0.95190000   2.49537971
  0.95190000   1.99406363
  0.95190000   2.49536879
  0.95190000   1.99406685
  0.95190000   2.49535925
  0.95190000   1.99406961
  0.95190000   2.49535083
  0.95190000   1.99407200
  0.95190000   2.49534335
  0.95190000   1.99407409
  0.95190000   2.49533667
  0.95190000   1.99407593
  0.95190000   2.49533065
  0.95190000   1.99407756
  0.95190000   2.49532520
  0.95190000   1.99407902
  0.95190000   2.49532025
  0.95200000   2.49641210
  0.95200000   1.99273210
  0.95200000   2.49639468
  0.95200000   1.99273761
  0.95200000   2.49637998
  0.95200000   1.99274212
  0.95200000   2.49636741
  0.95200000   1.99274588
  0.95200000   2.49635653
  0.95200000   1.99274906
  0.95200000   2.49634702
  0.95200000   1.99275179
  0.95200000   2.49633864
  0.95200000   1.99275416
  0.95200000   2.49633119
  0.95200000   1.99275622
  0.95200000   2.49632452
  0.95200000   1.99275804
  0.95200000   2.49631852
  0.95200000   1.99275966
  0.95200000   2.49631310
  0.95200000   1.99276111
  0.95200000   2.49630816
  0.95210000   2.49739500
  0.95210000   1.99141980
  0.95210000   2.49737765
  0.95210000   1.99142524
  0.95210000   2.49736301
  0.95210000   1.99142970
  0.95210000   2.49735049
  0.95210000   1.99143342
  0.95210000   2.49733965
  0.95210000   1.99143657
  0.95210000   2.49733017
  0.95210000   1.99143927
  0.95210000   2.49732181
  0.95210000   1.99144161
  0.95210000   2.49731439
  0.95210000   1.99144366
  0.95210000   2.49730775
  0.95210000   1.99144546
  0.95210000   2.49730177
  0.95210000   1.99144706
  0.95210000   2.49729635
  0.95210000   1.99144850
  0.95210000   2.49729144
  0.95220000   2.49837334
  0.95220000   1.99011272
  0.95220000   2.49835606
  0.95220000   1.99011810
  0.95220000   2.49834147
  0.95220000   1.99012251
  0.95220000   2.49832899
  0.95220000   1.99012619
  0.95220000   2.49831819
  0.95220000   1.99012931
  0.95220000   2.49830875
  0.95220000   1.99013198
  0.95220000   2.49830042
  0.95220000   1.99013430
  0.95220000   2.49829302
  0.95220000   1.99013632
  0.95220000   2.49828640
  0.95220000   1.99013811
  0.95220000   2.49828044
  0.95220000   1.99013969
  0.95220000   2.49827505
  0.95220000   1.99014111
  0.95220000   2.49827014
  0.95230000   2.49934719
  0.95230000   1.98881080
  0.95230000   2.49932997
  0.95230000   1.98881612
  0.95230000   2.49931544
  0.95230000   1.98882048
  0.95230000   2.49930300
  0.95230000   1.98882413
  0.95230000   2.49929224
  0.95230000   1.98882721
  0.95230000   2.49928283
  0.95230000   1.98882986
  0.95230000   2.49927453
  0.95230000   1.98883215
  0.95230000   2.49926715
  0.95230000   1.98883415
  0.95230000   2.49926055
  0.95230000   1.98883592
  0.95230000   2.49925461
  0.95230000   1.98883749
  0.95230000   2.49924924
  0.95230000   1.98883890
  0.95230000   2.49924435
  0.95240000   2.50031660
  0.95240000   1.98751398
  0.95240000   2.50029945
  0.95240000   1.98751924
  0.95240000   2.50028497
  0.95240000   1.98752356
  0.95240000   2.50027258
  0.95240000   1.98752716
  0.95240000   2.50026185
  0.95240000   1.98753021
  0.95240000   2.50025247
  0.95240000   1.98753283
  0.95240000   2.50024420
  0.95240000   1.98753510
  0.95240000   2.50023685
  0.95240000   1.98753709
  0.95240000   2.50023027
  0.95240000   1.98753883
  0.95240000   2.50022435
  0.95240000   1.98754039
  0.95240000   2.50021899
  0.95240000   1.98754178
  0.95240000   2.50021412
  0.95250000   2.50128164
  0.95250000   1.98622219
  0.95250000   2.50126456
  0.95250000   1.98622739
  0.95250000   2.50125013
  0.95250000   1.98623167
  0.95250000   2.50123778
  0.95250000   1.98623523
  0.95250000   2.50122710
  0.95250000   1.98623825
  0.95250000   2.50121775
  0.95250000   1.98624085
  0.95250000   2.50120950
  0.95250000   1.98624309
  0.95250000   2.50120218
  0.95250000   1.98624506
  0.95250000   2.50119562
  0.95250000   1.98624679
  0.95250000   2.50118972
  0.95250000   1.98624833
  0.95250000   2.50118438
  0.95250000   1.98624971
  0.95250000   2.50117952
  0.95260000   2.50224239
  0.95260000   1.98493537
  0.95260000   2.50222536
  0.95260000   1.98494052
  0.95260000   2.50221099
  0.95260000   1.98494475
  0.95260000   2.50219869
  0.95260000   1.98494828
  0.95260000   2.50218803
  0.95260000   1.98495127
  0.95260000   2.50217872
  0.95260000   1.98495383
  0.95260000   2.50217050
  0.95260000   1.98495606
  0.95260000   2.50216320
  0.95260000   1.98495800
  0.95260000   2.50215666
  0.95260000   1.98495972
  0.95260000   2.50215077
  0.95260000   1.98496125
  0.95260000   2.50214545
  0.95260000   1.98496261
  0.95260000   2.50214061
  0.95270000   2.50319888
  0.95270000   1.98365347
  0.95270000   2.50318192
  0.95270000   1.98365857
  0.95270000   2.50316760
  0.95270000   1.98366275
  0.95270000   2.50315534
  0.95270000   1.98366624
  0.95270000   2.50314472
  0.95270000   1.98366920
  0.95270000   2.50313544
  0.95270000   1.98367174
  0.95270000   2.50312725
  0.95270000   1.98367394
  0.95270000   2.50311997
  0.95270000   1.98367587
  0.95270000   2.50311345
  0.95270000   1.98367757
  0.95270000   2.50310759
  0.95270000   1.98367908
  0.95270000   2.50310228
  0.95270000   1.98368043
  0.95270000   2.50309745
  0.95280000   2.50415120
  0.95280000   1.98237642
  0.95280000   2.50413430
  0.95280000   1.98238147
  0.95280000   2.50412003
  0.95280000   1.98238561
  0.95280000   2.50410781
  0.95280000   1.98238906
  0.95280000   2.50409723
  0.95280000   1.98239199
  0.95280000   2.50408797
  0.95280000   1.98239451
  0.95280000   2.50407981
  0.95280000   1.98239669
  0.95280000   2.50407255
  0.95280000   1.98239860
  0.95280000   2.50406606
  0.95280000   1.98240028
  0.95280000   2.50406021
  0.95280000   1.98240178
  0.95280000   2.50405492
  0.95280000   1.98240311
  0.95280000   2.50405010
  0.95290000   2.50509939
  0.95290000   1.98110418
  0.95290000   2.50508255
  0.95290000   1.98110917
  0.95290000   2.50506833
  0.95290000   1.98111326
  0.95290000   2.50505615
  0.95290000   1.98111669
  0.95290000   2.50504561
  0.95290000   1.98111959
  0.95290000   2.50503638
  0.95290000   1.98112208
  0.95290000   2.50502825
  0.95290000   1.98112424
  0.95290000   2.50502101
  0.95290000   1.98112613
  0.95290000   2.50501454
  0.95290000   1.98112779
  0.95290000   2.50500871
  0.95290000   1.98112928
  0.95290000   2.50500343
  0.95290000   1.98113060
  0.95290000   2.50499863
  0.95300000   2.50604352
  0.95300000   1.97983667
  0.95300000   2.50602674
  0.95300000   1.97984161
  0.95300000   2.50601257
  0.95300000   1.97984566
  0.95300000   2.50600043
  0.95300000   1.97984905
  0.95300000   2.50598992
  0.95300000   1.97985193
  0.95300000   2.50598072
  0.95300000   1.97985439
  0.95300000   2.50597261
  0.95300000   1.97985653
  0.95300000   2.50596540
  0.95300000   1.97985840
  0.95300000   2.50595894
  0.95300000   1.97986005
  0.95300000   2.50595313
  0.95300000   1.97986152
  0.95300000   2.50594787
  0.95300000   1.97986283
  0.95300000   2.50594309
  0.95310000   2.50698363
  0.95310000   1.97857385
  0.95310000   2.50696692
  0.95310000   1.97857874
  0.95310000   2.50695279
  0.95310000   1.97858276
  0.95310000   2.50694069
  0.95310000   1.97858611
  0.95310000   2.50693022
  0.95310000   1.97858896
  0.95310000   2.50692105
  0.95310000   1.97859140
  0.95310000   2.50691297
  0.95310000   1.97859352
  0.95310000   2.50690578
  0.95310000   1.97859537
  0.95310000   2.50689934
  0.95310000   1.97859701
  0.95310000   2.50689355
  0.95310000   1.97859846
  0.95310000   2.50688830
  0.95310000   1.97859976
  0.95310000   2.50688353
  0.95320000   2.50791980
  0.95320000   1.97731567
  0.95320000   2.50790313
  0.95320000   1.97732051
  0.95320000   2.50788906
  0.95320000   1.97732448
  0.95320000   2.50787700
  0.95320000   1.97732781
  0.95320000   2.50786656
  0.95320000   1.97733062
  0.95320000   2.50785742
  0.95320000   1.97733304
  0.95320000   2.50784936
  0.95320000   1.97733514
  0.95320000   2.50784219
  0.95320000   1.97733698
  0.95320000   2.50783578
  0.95320000   1.97733860
  0.95320000   2.50783000
  0.95320000   1.97734004
  0.95320000   2.50782477
  0.95320000   1.97734133
  0.95320000   2.50782002
  0.95330000   2.50885206
  0.95330000   1.97606207
  0.95330000   2.50883545
  0.95330000   1.97606686
  0.95330000   2.50882142
  0.95330000   1.97607079
  0.95330000   2.50880941
  0.95330000   1.97607408
  0.95330000   2.50879900
  0.95330000   1.97607687
  0.95330000   2.50878989
  0.95330000   1.97607927
  0.95330000   2.50878185
  0.95330000   1.97608135
  0.95330000   2.50877471
  0.95330000   1.97608317
  0.95330000   2.50876832
  0.95330000   1.97608477
  0.95330000   2.50876255
  0.95330000   1.97608620
  0.95330000   2.50875734
  0.95330000   1.97608748
  0.95330000   2.50875260
  0.95340000   2.50978047
  0.95340000   1.97481300
  0.95340000   2.50976393
  0.95340000   1.97481774
  0.95340000   2.50974994
  0.95340000   1.97482163
  0.95340000   2.50973797
  0.95340000   1.97482489
  0.95340000   2.50972759
  0.95340000   1.97482766
  0.95340000   2.50971851
  0.95340000   1.97483003
  0.95340000   2.50971050
  0.95340000   1.97483209
  0.95340000   2.50970338
  0.95340000   1.97483389
  0.95340000   2.50969700
  0.95340000   1.97483548
  0.95340000   2.50969126
  0.95340000   1.97483690
  0.95340000   2.50968606
  0.95340000   1.97483817
  0.95340000   2.50968133
  0.95350000   2.51070509
  0.95350000   1.97356841
  0.95350000   2.51068860
  0.95350000   1.97357310
  0.95350000   2.51067467
  0.95350000   1.97357696
  0.95350000   2.51066273
  0.95350000   1.97358019
  0.95350000   2.51065239
  0.95350000   1.97358293
  0.95350000   2.51064333
  0.95350000   1.97358528
  0.95350000   2.51063535
  0.95350000   1.97358731
  0.95350000   2.51062824
  0.95350000   1.97358910
  0.95350000   2.51062189
  0.95350000   1.97359068
  0.95350000   2.51061616
  0.95350000   1.97359208
  0.95350000   2.51061098
  0.95350000   1.97359334
  0.95350000   2.51060626
  0.95360000   2.51162597
  0.95360000   1.97232825
  0.95360000   2.51160953
  0.95360000   1.97233289
  0.95360000   2.51159564
  0.95360000   1.97233672
  0.95360000   2.51158374
  0.95360000   1.97233991
  0.95360000   2.51157343
  0.95360000   1.97234262
  0.95360000   2.51156441
  0.95360000   1.97234495
  0.95360000   2.51155645
  0.95360000   1.97234697
  0.95360000   2.51154937
  0.95360000   1.97234874
  0.95360000   2.51154303
  0.95360000   1.97235031
  0.95360000   2.51153732
  0.95360000   1.97235170
  0.95360000   2.51153215
  0.95360000   1.97235294
  0.95360000   2.51152745
  0.95370000   2.51254315
  0.95370000   1.97109247
  0.95370000   2.51252677
  0.95370000   1.97109707
  0.95370000   2.51251293
  0.95370000   1.97110085
  0.95370000   2.51250107
  0.95370000   1.97110402
  0.95370000   2.51249079
  0.95370000   1.97110671
  0.95370000   2.51248179
  0.95370000   1.97110902
  0.95370000   2.51247385
  0.95370000   1.97111102
  0.95370000   2.51246679
  0.95370000   1.97111277
  0.95370000   2.51246047
  0.95370000   1.97111433
  0.95370000   2.51245478
  0.95370000   1.97111570
  0.95370000   2.51244962
  0.95370000   1.97111694
  0.95370000   2.51244493
  0.95380000   2.51345669
  0.95380000   1.96986102
  0.95380000   2.51344037
  0.95380000   1.96986558
  0.95380000   2.51342657
  0.95380000   1.96986933
  0.95380000   2.51341474
  0.95380000   1.96987247
  0.95380000   2.51340450
  0.95380000   1.96987513
  0.95380000   2.51339553
  0.95380000   1.96987742
  0.95380000   2.51338761
  0.95380000   1.96987940
  0.95380000   2.51338057
  0.95380000   1.96988114
  0.95380000   2.51337427
  0.95380000   1.96988268
  0.95380000   2.51336859
  0.95380000   1.96988404
  0.95380000   2.51336345
  0.95380000   1.96988527
  0.95380000   2.51335878
  0.95390000   2.51436663
  0.95390000   1.96863387
  0.95390000   2.51435036
  0.95390000   1.96863838
  0.95390000   2.51433661
  0.95390000   1.96864210
  0.95390000   2.51432482
  0.95390000   1.96864521
  0.95390000   2.51431460
  0.95390000   1.96864785
  0.95390000   2.51430567
  0.95390000   1.96865011
  0.95390000   2.51429777
  0.95390000   1.96865208
  0.95390000   2.51429075
  0.95390000   1.96865380
  0.95390000   2.51428447
  0.95390000   1.96865533
  0.95390000   2.51427881
  0.95390000   1.96865668
  0.95390000   2.51427368
  0.95390000   1.96865789
  0.95390000   2.51426902
  0.95400000   2.51527303
  0.95400000   1.96741096
  0.95400000   2.51525681
  0.95400000   1.96741543
  0.95400000   2.51524310
  0.95400000   1.96741911
  0.95400000   2.51523135
  0.95400000   1.96742219
  0.95400000   2.51522117
  0.95400000   1.96742481
  0.95400000   2.51521225
  0.95400000   1.96742705
  0.95400000   2.51520438
  0.95400000   1.96742900
  0.95400000   2.51519738
  0.95400000   1.96743071
  0.95400000   2.51519112
  0.95400000   1.96743222
  0.95400000   2.51518547
  0.95400000   1.96743356
  0.95400000   2.51518036
  0.95400000   1.96743476
  0.95400000   2.51517571
  0.95410000   2.51617592
  0.95410000   1.96619224
  0.95410000   2.51615976
  0.95410000   1.96619668
  0.95410000   2.51614609
  0.95410000   1.96620032
  0.95410000   2.51613438
  0.95410000   1.96620337
  0.95410000   2.51612422
  0.95410000   1.96620596
  0.95410000   2.51611533
  0.95410000   1.96620819
  0.95410000   2.51610749
  0.95410000   1.96621013
  0.95410000   2.51610051
  0.95410000   1.96621182
  0.95410000   2.51609426
  0.95410000   1.96621331
  0.95410000   2.51608863
  0.95410000   1.96621464
  0.95410000   2.51608354
  0.95410000   1.96621584
  0.95410000   2.51607890
  0.95420000   2.51707536
  0.95420000   1.96497769
  0.95420000   2.51705924
  0.95420000   1.96498208
  0.95420000   2.51704562
  0.95420000   1.96498569
  0.95420000   2.51703394
  0.95420000   1.96498871
  0.95420000   2.51702382
  0.95420000   1.96499128
  0.95420000   2.51701496
  0.95420000   1.96499349
  0.95420000   2.51700714
  0.95420000   1.96499541
  0.95420000   2.51700018
  0.95420000   1.96499708
  0.95420000   2.51699395
  0.95420000   1.96499857
  0.95420000   2.51698833
  0.95420000   1.96499989
  0.95420000   2.51698325
  0.95420000   1.96500107
  0.95420000   2.51697862
  0.95430000   2.51797138
  0.95430000   1.96376724
  0.95430000   2.51795532
  0.95430000   1.96377159
  0.95430000   2.51794174
  0.95430000   1.96377517
  0.95430000   2.51793010
  0.95430000   1.96377817
  0.95430000   2.51792001
  0.95430000   1.96378071
  0.95430000   2.51791117
  0.95430000   1.96378290
  0.95430000   2.51790337
  0.95430000   1.96378480
  0.95430000   2.51789643
  0.95430000   1.96378646
  0.95430000   2.51789022
  0.95430000   1.96378793
  0.95430000   2.51788462
  0.95430000   1.96378924
  0.95430000   2.51787955
  0.95430000   1.96379042
  0.95430000   2.51787494
  0.95440000   2.51886404
  0.95440000   1.96256086
  0.95440000   2.51884803
  0.95440000   1.96256518
  0.95440000   2.51883449
  0.95440000   1.96256872
  0.95440000   2.51882289
  0.95440000   1.96257169
  0.95440000   2.51881282
  0.95440000   1.96257422
  0.95440000   2.51880401
  0.95440000   1.96257639
  0.95440000   2.51879624
  0.95440000   1.96257827
  0.95440000   2.51878932
  0.95440000   1.96257992
  0.95440000   2.51878312
  0.95440000   1.96258138
  0.95440000   2.51877754
  0.95440000   1.96258267
  0.95440000   2.51877248
  0.95440000   1.96258384
  0.95440000   2.51876788
  0.95450000   2.51975338
  0.95450000   1.96135850
  0.95450000   2.51973741
  0.95450000   1.96136279
  0.95450000   2.51972392
  0.95450000   1.96136630
  0.95450000   2.51971235
  0.95450000   1.96136925
  0.95450000   2.51970231
  0.95450000   1.96137175
  0.95450000   2.51969353
  0.95450000   1.96137390
  0.95450000   2.51968577
  0.95450000   1.96137577
  0.95450000   2.51967887
  0.95450000   1.96137740
  0.95450000   2.51967269
  0.95450000   1.96137885
  0.95450000   2.51966713
  0.95450000   1.96138014
  0.95450000   2.51966209
  0.95450000   1.96138129
  0.95450000   2.51965750
  0.95460000   2.52063944
  0.95460000   1.96016014
  0.95460000   2.52062352
  0.95460000   1.96016440
  0.95460000   2.52061006
  0.95460000   1.96016787
  0.95460000   2.52059853
  0.95460000   1.96017079
  0.95460000   2.52058852
  0.95460000   1.96017327
  0.95460000   2.52057976
  0.95460000   1.96017541
  0.95460000   2.52057203
  0.95460000   1.96017726
  0.95460000   2.52056515
  0.95460000   1.96017888
  0.95460000   2.52055899
  0.95460000   1.96018031
  0.95460000   2.52055343
  0.95460000   1.96018159
  0.95460000   2.52054841
  0.95460000   1.96018273
  0.95460000   2.52054383
  0.95470000   2.52152225
  0.95470000   1.95896572
  0.95470000   2.52150638
  0.95470000   1.95896995
  0.95470000   2.52149297
  0.95470000   1.95897339
  0.95470000   2.52148146
  0.95470000   1.95897629
  0.95470000   2.52147149
  0.95470000   1.95897875
  0.95470000   2.52146275
  0.95470000   1.95898086
  0.95470000   2.52145504
  0.95470000   1.95898270
  0.95470000   2.52144818
  0.95470000   1.95898431
  0.95470000   2.52144203
  0.95470000   1.95898573
  0.95470000   2.52143650
  0.95470000   1.95898700
  0.95470000   2.52143148
  0.95470000   1.95898813
  0.95470000   2.52142692
  0.95480000   2.52240187
  0.95480000   1.95777520
  0.95480000   2.52238604
  0.95480000   1.95777941
  0.95480000   2.52237267
  0.95480000   1.95778282
  0.95480000   2.52236120
  0.95480000   1.95778569
  0.95480000   2.52235126
  0.95480000   1.95778813
  0.95480000   2.52234255
  0.95480000   1.95779023
  0.95480000   2.52233485
  0.95480000   1.95779205
  0.95480000   2.52232801
  0.95480000   1.95779364
  0.95480000   2.52232188
  0.95480000   1.95779506
  0.95480000   2.52231636
  0.95480000   1.95779631
  0.95480000   2.52231136
  0.95480000   1.95779743
  0.95480000   2.52230681
  0.95490000   2.52327833
  0.95490000   1.95658856
  0.95490000   2.52326254
  0.95490000   1.95659275
  0.95490000   2.52324922
  0.95490000   1.95659612
  0.95490000   2.52323778
  0.95490000   1.95659897
  0.95490000   2.52322786
  0.95490000   1.95660139
  0.95490000   2.52321918
  0.95490000   1.95660347
  0.95490000   2.52321151
  0.95490000   1.95660527
  0.95490000   2.52320468
  0.95490000   1.95660686
  0.95490000   2.52319857
  0.95490000   1.95660826
  0.95490000   2.52319306
  0.95490000   1.95660950
  0.95490000   2.52318807
  0.95490000   1.95661062
  0.95490000   2.52318354
  0.95500000   2.52415168
  0.95500000   1.95540574
  0.95500000   2.52413592
  0.95500000   1.95540992
  0.95500000   2.52412264
  0.95500000   1.95541326
  0.95500000   2.52411124
  0.95500000   1.95541608
  0.95500000   2.52410135
  0.95500000   1.95541848
  0.95500000   2.52409269
  0.95500000   1.95542054
  0.95500000   2.52408504
  0.95500000   1.95542233
  0.95500000   2.52407823
  0.95500000   1.95542390
  0.95500000   2.52407213
  0.95500000   1.95542529
  0.95500000   2.52406664
  0.95500000   1.95542653
  0.95500000   2.52406167
  0.95500000   1.95542763
  0.95500000   2.52405714
  0.95510000   2.52502195
  0.95510000   1.95422671
  0.95510000   2.52500622
  0.95510000   1.95423089
  0.95510000   2.52499299
  0.95510000   1.95423419
  0.95510000   2.52498161
  0.95510000   1.95423700
  0.95510000   2.52497175
  0.95510000   1.95423937
  0.95510000   2.52496311
  0.95510000   1.95424142
  0.95510000   2.52495549
  0.95510000   1.95424319
  0.95510000   2.52494870
  0.95510000   1.95424475
  0.95510000   2.52494262
  0.95510000   1.95424613
  0.95510000   2.52493714
  0.95510000   1.95424735
  0.95510000   2.52493218
  0.95510000   1.95424845
  0.95510000   2.52492766
  0.95520000   2.52588919
  0.95520000   1.95305143
  0.95520000   2.52587347
  0.95520000   1.95305563
  0.95520000   2.52586029
  0.95520000   1.95305888
  0.95520000   2.52584894
  0.95520000   1.95306167
  0.95520000   2.52583911
  0.95520000   1.95306402
  0.95520000   2.52583050
  0.95520000   1.95306605
  0.95520000   2.52582289
  0.95520000   1.95306781
  0.95520000   2.52581613
  0.95520000   1.95306936
  0.95520000   2.52581006
  0.95520000   1.95307073
  0.95520000   2.52580460
  0.95520000   1.95307194
  0.95520000   2.52579965
  0.95520000   1.95307303
  0.95520000   2.52579514
  0.95530000   2.52675342
  0.95530000   1.95187986
  0.95530000   2.52673772
  0.95530000   1.95188409
  0.95530000   2.52672459
  0.95530000   1.95188730
  0.95530000   2.52671327
  0.95530000   1.95189007
  0.95530000   2.52670347
  0.95530000   1.95189240
  0.95530000   2.52669488
  0.95530000   1.95189441
  0.95530000   2.52668729
  0.95530000   1.95189616
  0.95530000   2.52668054
  0.95530000   1.95189770
  0.95530000   2.52667450
  0.95530000   1.95189905
  0.95530000   2.52666905
  0.95530000   1.95190026
  0.95530000   2.52666411
  0.95530000   1.95190134
  0.95530000   2.52665962
  0.95540000   2.52761470
  0.95540000   1.95071198
  0.95540000   2.52759900
  0.95540000   1.95071625
  0.95540000   2.52758592
  0.95540000   1.95071940
  0.95540000   2.52757463
  0.95540000   1.95072216
  0.95540000   2.52756486
  0.95540000   1.95072447
  0.95540000   2.52755629
  0.95540000   1.95072647
  0.95540000   2.52754873
  0.95540000   1.95072820
  0.95540000   2.52754199
  0.95540000   1.95072972
  0.95540000   2.52753596
  0.95540000   1.95073107
  0.95540000   2.52753053
  0.95540000   1.95073227
  0.95540000   2.52752560
  0.95540000   1.95073334
  0.95540000   2.52752112
  0.95550000   2.52847305
  0.95550000   1.94954773
  0.95550000   2.52845735
  0.95550000   1.94955207
  0.95550000   2.52844432
  0.95550000   1.94955516
  0.95550000   2.52843306
  0.95550000   1.94955791
  0.95550000   2.52842331
  0.95550000   1.94956020
  0.95550000   2.52841477
  0.95550000   1.94956218
  0.95550000   2.52840723
  0.95550000   1.94956390
  0.95550000   2.52840051
  0.95550000   1.94956541
  0.95550000   2.52839449
  0.95550000   1.94956675
  0.95550000   2.52838907
  0.95550000   1.94956793
  0.95550000   2.52838416
  0.95550000   1.94956900
  0.95550000   2.52837969
  0.95560000   2.52932852
  0.95560000   1.94838708
  0.95560000   2.52931279
  0.95560000   1.94839152
  0.95560000   2.52929982
  0.95560000   1.94839455
  0.95560000   2.52928859
  0.95560000   1.94839728
  0.95560000   2.52927888
  0.95560000   1.94839954
  0.95560000   2.52927035
  0.95560000   1.94840151
  0.95560000   2.52926283
  0.95560000   1.94840322
  0.95560000   2.52925613
  0.95560000   1.94840472
  0.95560000   2.52925013
  0.95560000   1.94840604
  0.95560000   2.52924472
  0.95560000   1.94840722
  0.95560000   2.52923982
  0.95560000   1.94840828
  0.95560000   2.52923537
  0.95570000   2.53018114
  0.95570000   1.94723000
  0.95570000   2.53016537
  0.95570000   1.94723456
  0.95570000   2.53015247
  0.95570000   1.94723751
  0.95570000   2.53014126
  0.95570000   1.94724024
  0.95570000   2.53013158
  0.95570000   1.94724248
  0.95570000   2.53012308
  0.95570000   1.94724444
  0.95570000   2.53011557
  0.95570000   1.94724613
  0.95570000   2.53010889
  0.95570000   1.94724762
  0.95570000   2.53010291
  0.95570000   1.94724893
  0.95570000   2.53009751
  0.95570000   1.94725010
  0.95570000   2.53009263
  0.95570000   1.94725115
  0.95570000   2.53008818
  0.95580000   2.53103095
  0.95580000   1.94607645
  0.95580000   2.53101512
  0.95580000   1.94608117
  0.95580000   2.53100229
  0.95580000   1.94608403
  0.95580000   2.53099110
  0.95580000   1.94608676
  0.95580000   2.53098145
  0.95580000   1.94608898
  0.95580000   2.53097297
  0.95580000   1.94609092
  0.95580000   2.53096549
  0.95580000   1.94609260
  0.95580000   2.53095882
  0.95580000   1.94609408
  0.95580000   2.53095285
  0.95580000   1.94609538
  0.95580000   2.53094747
  0.95580000   1.94609654
  0.95580000   2.53094260
  0.95580000   1.94609759
  0.95580000   2.53093816
  0.95590000   2.53187798
  0.95590000   1.94492640
  0.95590000   2.53186207
  0.95590000   1.94493132
  0.95590000   2.53184933
  0.95590000   1.94493407
  0.95590000   2.53183815
  0.95590000   1.94493681
  0.95590000   2.53182853
  0.95590000   1.94493900
  0.95590000   2.53182007
  0.95590000   1.94494093
  0.95590000   2.53181261
  0.95590000   1.94494259
  0.95590000   2.53180596
  0.95590000   1.94494406
  0.95590000   2.53180001
  0.95590000   1.94494536
  0.95590000   2.53179464
  0.95590000   1.94494651
  0.95590000   2.53178978
  0.95590000   1.94494754
  0.95590000   2.53178535
  0.95600000   2.53272228
  0.95600000   1.94377980
  0.95600000   2.53270625
  0.95600000   1.94378498
  0.95600000   2.53269361
  0.95600000   1.94378760
  0.95600000   2.53268244
  0.95600000   1.94379035
  0.95600000   2.53267285
  0.95600000   1.94379251
  0.95600000   2.53266442
  0.95600000   1.94379443
  0.95600000   2.53265697
  0.95600000   1.94379608
  0.95600000   2.53265034
  0.95600000   1.94379754
  0.95600000   2.53264440
  0.95600000   1.94379882
  0.95600000   2.53263905
  0.95600000   1.94379997
  0.95600000   2.53263420
  0.95600000   1.94380100
  0.95600000   2.53262979
  0.95610000   2.53356387
  0.95610000   1.94263661
  0.95610000   2.53354770
  0.95610000   1.94264211
  0.95610000   2.53353516
  0.95610000   1.94264458
  0.95610000   2.53352400
  0.95610000   1.94264736
  0.95610000   2.53351445
  0.95610000   1.94264949
  0.95610000   2.53350603
  0.95610000   1.94265140
  0.95610000   2.53349861
  0.95610000   1.94265303
  0.95610000   2.53349200
  0.95610000   1.94265448
  0.95610000   2.53348607
  0.95610000   1.94265575
  0.95610000   2.53348073
  0.95610000   1.94265689
  0.95610000   2.53347590
  0.95610000   1.94265791
  0.95610000   2.53347149
  0.95620000   2.53440281
  0.95620000   1.94149681
  0.95620000   2.53438645
  0.95620000   1.94150270
  0.95620000   2.53437403
  0.95620000   1.94150499
  0.95620000   2.53436287
  0.95620000   1.94150781
  0.95620000   2.53435336
  0.95620000   1.94150989
  0.95620000   2.53434496
  0.95620000   1.94151180
  0.95620000   2.53433756
  0.95620000   1.94151342
  0.95620000   2.53433096
  0.95620000   1.94151485
  0.95620000   2.53432505
  0.95620000   1.94151612
  0.95620000   2.53431973
  0.95620000   1.94151725
  0.95620000   2.53431490
  0.95620000   1.94151826
  0.95620000   2.53431051
  0.95630000   2.53523911
  0.95630000   1.94036036
  0.95630000   2.53522252
  0.95630000   1.94036671
  0.95630000   2.53521025
  0.95630000   1.94036879
  0.95630000   2.53519908
  0.95630000   1.94037166
  0.95630000   2.53518960
  0.95630000   1.94037370
  0.95630000   2.53518122
  0.95630000   1.94037560
  0.95630000   2.53517384
  0.95630000   1.94037721
  0.95630000   2.53516726
  0.95630000   1.94037864
  0.95630000   2.53516137
  0.95630000   1.94037989
  0.95630000   2.53515605
  0.95630000   1.94038101
  0.95630000   2.53515124
  0.95630000   1.94038201
  0.95630000   2.53514686
  0.95640000   2.53607281
  0.95640000   1.93922723
  0.95640000   2.53605595
  0.95640000   1.93923412
  0.95640000   2.53604384
  0.95640000   1.93923595
  0.95640000   2.53603265
  0.95640000   1.93923888
  0.95640000   2.53602322
  0.95640000   1.93924088
  0.95640000   2.53601485
  0.95640000   1.93924278
  0.95640000   2.53600749
  0.95640000   1.93924437
  0.95640000   2.53600093
  0.95640000   1.93924579
  0.95640000   2.53599505
  0.95640000   1.93924703
  0.95640000   2.53598975
  0.95640000   1.93924814
  0.95640000   2.53598495
  0.95640000   1.93924914
  0.95640000   2.53598058
  0.95650000   2.53690395
  0.95650000   1.93809737
  0.95650000   2.53688677
  0.95650000   1.93810490
  0.95650000   2.53687483
  0.95650000   1.93810645
  0.95650000   2.53686362
  0.95650000   1.93810946
  0.95650000   2.53685424
  0.95650000   1.93811140
  0.95650000   2.53684589
  0.95650000   1.93811330
  0.95650000   2.53683855
  0.95650000   1.93811487
  0.95650000   2.53683200
  0.95650000   1.93811628
  0.95650000   2.53682614
  0.95650000   1.93811752
  0.95650000   2.53682085
  0.95650000   1.93811863
  0.95650000   2.53681606
  0.95650000   1.93811961
  0.95650000   2.53681170
  0.95660000   2.53773255
  0.95660000   1.93697077
  0.95660000   2.53771501
  0.95660000   1.93697902
  0.95660000   2.53770327
  0.95660000   1.93698024
  0.95660000   2.53769202
  0.95660000   1.93698336
  0.95660000   2.53768269
  0.95660000   1.93698524
  0.95660000   2.53767435
  0.95660000   1.93698714
  0.95660000   2.53766704
  0.95660000   1.93698869
  0.95660000   2.53766050
  0.95660000   1.93699010
  0.95660000   2.53765466
  0.95660000   1.93699133
  0.95660000   2.53764938
  0.95660000   1.93699242
  0.95660000   2.53764460
  0.95660000   1.93699341
  0.95660000   2.53764025
  0.95670000   2.53855866
  0.95670000   1.93584738
  0.95670000   2.53854068
  0.95670000   1.93585647
  0.95670000   2.53852918
  0.95670000   1.93585731
  0.95670000   2.53851789
  0.95670000   1.93586055
  0.95670000   2.53850861
  0.95670000   1.93586236
  0.95670000   2.53850028
  0.95670000   1.93586427
  0.95670000   2.53849299
  0.95670000   1.93586580
  0.95670000   2.53848647
  0.95670000   1.93586720
  0.95670000   2.53848063
  0.95670000   1.93586842
  0.95670000   2.53847537
  0.95670000   1.93586951
  0.95670000   2.53847061
  0.95670000   1.93587048
  0.95670000   2.53846627
  0.95680000   2.53938229
  0.95680000   1.93472719
  0.95680000   2.53936384
  0.95680000   1.93473720
  0.95680000   2.53935259
  0.95680000   1.93473762
  0.95680000   2.53934123
  0.95680000   1.93474102
  0.95680000   2.53933202
  0.95680000   1.93474273
  0.95680000   2.53932369
  0.95680000   1.93474466
  0.95680000   2.53931643
  0.95680000   1.93474617
  0.95680000   2.53930992
  0.95680000   1.93474756
  0.95680000   2.53930411
  0.95680000   1.93474877
  0.95680000   2.53929886
  0.95680000   1.93474986
  0.95680000   2.53929410
  0.95680000   1.93475082
  0.95680000   2.53928977
  0.95690000   2.54020348
  0.95690000   1.93361018
  0.95690000   2.54018449
  0.95690000   1.93362120
  0.95690000   2.54017353
  0.95690000   1.93362115
  0.95690000   2.54016210
  0.95690000   1.93362472
  0.95690000   2.54015296
  0.95690000   1.93362634
  0.95690000   2.54014463
  0.95690000   1.93362829
  0.95690000   2.54013739
  0.95690000   1.93362978
  0.95690000   2.54013090
  0.95690000   1.93363116
  0.95690000   2.54012510
  0.95690000   1.93363236
  0.95690000   2.54011986
  0.95690000   1.93363344
  0.95690000   2.54011512
  0.95690000   1.93363440
  0.95690000   2.54011080
  0.95700000   2.54102224
  0.95700000   1.93249633
  0.95700000   2.54100269
  0.95700000   1.93250844
  0.95700000   2.54099203
  0.95700000   1.93250788
  0.95700000   2.54098051
  0.95700000   1.93251164
  0.95700000   2.54097144
  0.95700000   1.93251315
  0.95700000   2.54096311
  0.95700000   1.93251513
  0.95700000   2.54095591
  0.95700000   1.93251658
  0.95700000   2.54094943
  0.95700000   1.93251797
  0.95700000   2.54094364
  0.95700000   1.93251916
  0.95700000   2.54093842
  0.95700000   1.93252023
  0.95700000   2.54093368
  0.95700000   1.93252118
  0.95700000   2.54092937
  0.95710000   2.54183859
  0.95710000   1.93138563
  0.95710000   2.54181845
  0.95710000   1.93139887
  0.95710000   2.54180811
  0.95710000   1.93139776
  0.95710000   2.54179649
  0.95710000   1.93140174
  0.95710000   2.54178751
  0.95710000   1.93140314
  0.95710000   2.54177918
  0.95710000   1.93140515
  0.95710000   2.54177200
  0.95710000   1.93140657
  0.95710000   2.54176553
  0.95710000   1.93140796
  0.95710000   2.54175976
  0.95710000   1.93140913
  0.95710000   2.54175455
  0.95710000   1.93141020
  0.95710000   2.54174983
  0.95710000   1.93141114
  0.95710000   2.54174553
  0.95720000   2.54265254
  0.95720000   1.93027810
  0.95720000   2.54263181
  0.95720000   1.93029247
  0.95720000   2.54262181
  0.95720000   1.93029080
  0.95720000   2.54261008
  0.95720000   1.93029501
  0.95720000   2.54260118
  0.95720000   1.93029628
  0.95720000   2.54259285
  0.95720000   1.93029833
  0.95720000   2.54258570
  0.95720000   1.93029972
  0.95720000   2.54257924
  0.95720000   1.93030110
  0.95720000   2.54257349
  0.95720000   1.93030226
  0.95720000   2.54256828
  0.95720000   1.93030333
  0.95720000   2.54256358
  0.95720000   1.93030427
  0.95720000   2.54255929
  0.95730000   2.54346410
  0.95730000   1.92917374
  0.95730000   2.54344281
  0.95730000   1.92918918
  0.95730000   2.54343313
  0.95730000   1.92918697
  0.95730000   2.54342130
  0.95730000   1.92919140
  0.95730000   2.54341249
  0.95730000   1.92919254
  0.95730000   2.54340415
  0.95730000   1.92919464
  0.95730000   2.54339703
  0.95730000   1.92919599
  0.95730000   2.54339058
  0.95730000   1.92919738
  0.95730000   2.54338484
  0.95730000   1.92919853
  0.95730000   2.54337966
  0.95730000   1.92919958
  0.95730000   2.54337496
  0.95730000   1.92920051
  0.95730000   2.54337068
  0.95740000   2.54427327
  0.95740000   1.92807260
  0.95740000   2.54425149
  0.95740000   1.92808897
  0.95740000   2.54424212
  0.95740000   1.92808625
  0.95740000   2.54423018
  0.95740000   1.92809090
  0.95740000   2.54422146
  0.95740000   1.92809192
  0.95740000   2.54421311
  0.95740000   1.92809405
  0.95740000   2.54420602
  0.95740000   1.92809537
  0.95740000   2.54419958
  0.95740000   1.92809676
  0.95740000   2.54419386
  0.95740000   1.92809790
  0.95740000   2.54418869
  0.95740000   1.92809894
  0.95740000   2.54418400
  0.95740000   1.92809987
  0.95740000   2.54417973
  0.95750000   2.54508001
  0.95750000   1.92697473
  0.95750000   2.54505790
  0.95750000   1.92699176
  0.95750000   2.54504877
  0.95750000   1.92698864
  0.95750000   2.54503676
  0.95750000   1.92699347
  0.95750000   2.54502811
  0.95750000   1.92699437
  0.95750000   2.54501976
  0.95750000   1.92699654
  0.95750000   2.54501270
  0.95750000   1.92699783
  0.95750000   2.54500627
  0.95750000   1.92699922
  0.95750000   2.54500057
  0.95750000   1.92700034
  0.95750000   2.54499540
  0.95750000   1.92700139
  0.95750000   2.54499073
  0.95750000   1.92700231
  0.95750000   2.54498647
  0.95760000   2.54588432
  0.95760000   1.92588019
  0.95760000   2.54586209
  0.95760000   1.92589749
  0.95760000   2.54585312
  0.95760000   1.92589413
  0.95760000   2.54584106
  0.95760000   1.92589908
  0.95760000   2.54583248
  0.95760000   1.92589989
  0.95760000   2.54582412
  0.95760000   1.92590209
  0.95760000   2.54581710
  0.95760000   1.92590335
  0.95760000   2.54581068
  0.95760000   1.92590474
  0.95760000   2.54580499
  0.95760000   1.92590585
  0.95760000   2.54579984
  0.95760000   1.92590689
  0.95760000   2.54579517
  0.95760000   1.92590780
  0.95760000   2.54579092
  0.95770000   2.54668613
  0.95770000   1.92478910
  0.95770000   2.54666413
  0.95770000   1.92480606
  0.95770000   2.54665516
  0.95770000   1.92480273
  0.95770000   2.54664312
  0.95770000   1.92480769
  0.95770000   2.54663458
  0.95770000   1.92480846
  0.95770000   2.54662623
  0.95770000   1.92481066
  0.95770000   2.54661923
  0.95770000   1.92481190
  0.95770000   2.54661282
  0.95770000   1.92481329
  0.95770000   2.54660715
  0.95770000   1.92481439
  0.95770000   2.54660201
  0.95770000   1.92481543
  0.95770000   2.54659736
  0.95770000   1.92481633
  0.95770000   2.54659312
  0.95780000   2.54748540
  0.95780000   1.92370160
  0.95780000   2.54746407
  0.95780000   1.92371739
  0.95780000   2.54745490
  0.95780000   1.92371446
  0.95780000   2.54744297
  0.95780000   1.92371925
  0.95780000   2.54743443
  0.95780000   1.92372006
  0.95780000   2.54742611
  0.95780000   1.92372224
  0.95780000   2.54741913
  0.95780000   1.92372347
  0.95780000   2.54741273
  0.95780000   1.92372485
  0.95780000   2.54740708
  0.95780000   1.92372594
  0.95780000   2.54740194
  0.95780000   1.92372697
  0.95780000   2.54739731
  0.95780000   1.92372787
  0.95780000   2.54739307
  0.95790000   2.54828203
  0.95790000   1.92261786
  0.95790000   2.54826200
  0.95790000   1.92263134
  0.95790000   2.54825234
  0.95790000   1.92262935
  0.95790000   2.54824066
  0.95790000   1.92263372
  0.95790000   2.54823205
  0.95790000   1.92263468
  0.95790000   2.54822379
  0.95790000   1.92263678
  0.95790000   2.54821681
  0.95790000   1.92263803
  0.95790000   2.54821044
  0.95790000   1.92263939
  0.95790000   2.54820479
  0.95790000   1.92264048
  0.95790000   2.54819967
  0.95790000   1.92264150
  0.95790000   2.54819504
  0.95790000   1.92264239
  0.95790000   2.54819083
  0.95800000   2.54907591
  0.95800000   1.92153810
  0.95800000   2.54905801
  0.95800000   1.92154775
  0.95800000   2.54904746
  0.95800000   1.92154743
  0.95800000   2.54903622
  0.95800000   1.92155104
  0.95800000   2.54902746
  0.95800000   1.92155232
  0.95800000   2.54901930
  0.95800000   1.92155426
  0.95800000   2.54901230
  0.95800000   1.92155557
  0.95800000   2.54900596
  0.95800000   1.92155689
  0.95800000   2.54900032
  0.95800000   1.92155798
  0.95800000   2.54899522
  0.95800000   1.92155899
  0.95800000   2.54899060
  0.95800000   1.92155988
  0.95800000   2.54898639
  0.95810000   2.54986691
  0.95810000   1.92046259
  0.95810000   2.54985223
  0.95810000   1.92046647
  0.95810000   2.54984025
  0.95810000   1.92046878
  0.95810000   2.54982971
  0.95810000   1.92047115
  0.95810000   2.54982066
  0.95810000   1.92047298
  0.95810000   2.54981267
  0.95810000   1.92047465
  0.95810000   2.54980562
  0.95810000   1.92047606
  0.95810000   2.54979933
  0.95810000   1.92047733
  0.95810000   2.54979369
  0.95810000   1.92047843
  0.95810000   2.54978861
  0.95810000   1.92047943
  0.95810000   2.54978399
  0.95810000   1.92048032
  0.95810000   2.54977980
  0.95820000   2.55065488
  0.95820000   1.91939165
  0.95820000   2.55064476
  0.95820000   1.91938727
  0.95820000   2.55063068
  0.95820000   1.91939346
  0.95820000   2.55062119
  0.95820000   1.91939397
  0.95820000   2.55061168
  0.95820000   1.91939666
  0.95820000   2.55060393
  0.95820000   1.91939790
  0.95820000   2.55059679
  0.95820000   1.91939950
  0.95820000   2.55059057
  0.95820000   1.91940067
  0.95820000   2.55058492
  0.95820000   1.91940181
  0.95820000   2.55057986
  0.95820000   1.91940278
  0.95820000   2.55057526
  0.95820000   1.91940367
  0.95820000   2.55057107
  0.95830000   2.55143961
  0.95830000   1.91832564
  0.95830000   2.55143576
  0.95830000   1.91830992
  0.95830000   2.55141870
  0.95830000   1.91832157
  0.95830000   2.55141069
  0.95830000   1.91831941
  0.95830000   2.55140051
  0.95830000   1.91832337
  0.95830000   2.55139312
  0.95830000   1.91832399
  0.95830000   2.55138584
  0.95830000   1.91832588
  0.95830000   2.55137971
  0.95830000   1.91832689
  0.95830000   2.55137403
  0.95830000   1.91832809
  0.95830000   2.55136900
  0.95830000   1.91832902
  0.95830000   2.55136440
  0.95830000   1.91832993
  0.95830000   2.55136023
  0.95840000   2.55222091
  0.95840000   1.91726497
  0.95840000   2.55222538
  0.95840000   1.91723415
  0.95840000   2.55220426
  0.95840000   1.91725324
  0.95840000   2.55219831
  0.95840000   1.91724738
  0.95840000   2.55218714
  0.95840000   1.91725315
  0.95840000   2.55218028
  0.95840000   1.91725285
  0.95840000   2.55217276
  0.95840000   1.91725518
  0.95840000   2.55216677
  0.95840000   1.91725596
  0.95840000   2.55216105
  0.95840000   1.91725727
  0.95840000   2.55215606
  0.95840000   1.91725814
  0.95840000   2.55215146
  0.95840000   1.91725906
  0.95840000   2.55214730
  0.95850000   2.55299852
  0.95850000   1.91621009
  0.95850000   2.55301380
  0.95850000   1.91615966
  0.95850000   2.55298730
  0.95850000   1.91618860
  0.95850000   2.55298411
  0.95850000   1.91617776
  0.95850000   2.55297159
  0.95850000   1.91618601
  0.95850000   2.55296543
  0.95850000   1.91618445
  0.95850000   2.55295759
  0.95850000   1.91618740
  0.95850000   2.55295179
  0.95850000   1.91618786
  0.95850000   2.55294600
  0.95850000   1.91618932
  0.95850000   2.55294106
  0.95850000   1.91619010
  0.95850000   2.55293645
  0.95850000   1.91619106
  0.95850000   2.55293231
  0.95860000   2.55377221
  0.95860000   1.91516148
  0.95860000   2.55380121
  0.95860000   1.91508613
  0.95860000   2.55376773
  0.95860000   1.91512782
  0.95860000   2.55376816
  0.95860000   1.91511042
  0.95860000   2.55375383
  0.95860000   1.91512201
  0.95860000   2.55374864
  0.95860000   1.91511872
  0.95860000   2.55374034
  0.95860000   1.91512254
  0.95860000   2.55373479
  0.95860000   1.91512254
  0.95860000   2.55372889
  0.95860000   1.91512422
  0.95860000   2.55372403
  0.95860000   1.91512488
  0.95860000   2.55371939
  0.95860000   1.91512590
  0.95860000   2.55371528
  0.95870000   2.55454175
  0.95870000   1.91411957
  0.95870000   2.55458779
  0.95870000   1.91401325
  0.95870000   2.55454548
  0.95870000   1.91407106
  0.95870000   2.55455057
  0.95870000   1.91404523
  0.95870000   2.55453386
  0.95870000   1.91406119
  0.95870000   2.55452993
  0.95870000   1.91405562
  0.95870000   2.55452100
  0.95870000   1.91406060
  0.95870000   2.55451581
  0.95870000   1.91405999
  0.95870000   2.55450974
  0.95870000   1.91406198
  0.95870000   2.55450499
  0.95870000   1.91406247
  0.95870000   2.55450031
  0.95870000   1.91406356
  0.95870000   2.55449624
  0.95880000   2.55530691
  0.95880000   1.91308478
  0.95880000   2.55537373
  0.95880000   1.91294070
  0.95880000   2.55532048
  0.95880000   1.91301848
  0.95880000   2.55533140
  0.95880000   1.91298206
  0.95880000   2.55531165
  0.95880000   1.91300359
  0.95880000   2.55530936
  0.95880000   1.91299506
  0.95880000   2.55529959
  0.95880000   1.91300159
  0.95880000   2.55529487
  0.95880000   1.91300015
  0.95880000   2.55528858
  0.95880000   1.91300257
  0.95880000   2.55528396
  0.95880000   1.91300283
  0.95880000   2.55527923
  0.95880000   1.91300403
  0.95880000   2.55527520
  0.95890000   2.55606758
  0.95890000   1.91205738
  0.95890000   2.55615916
  0.95890000   1.91186824
  0.95890000   2.55609264
  0.95890000   1.91197024
  0.95890000   2.55611075
  0.95890000   1.91192077
  0.95890000   2.55608718
  0.95890000   1.91194928
  0.95890000   2.55608697
  0.95890000   1.91193700
  0.95890000   2.55607613
  0.95890000   1.91194552
  0.95890000   2.55607200
  0.95890000   1.91194300
  0.95890000   2.55606542
  0.95890000   1.91194598
  0.95890000   2.55606098
  0.95890000   1.91194593
  0.95890000   2.55605617
  0.95890000   1.91194729
  0.95890000   2.55605219
  0.95900000   2.55682370
  0.95900000   1.91103744
  0.95900000   2.55694419
  0.95900000   1.91079571
  0.95900000   2.55686193
  0.95900000   1.91092643
  0.95900000   2.55688868
  0.95900000   1.91086125
  0.95900000   2.55686045
  0.95900000   1.91089830
  0.95900000   2.55686282
  0.95900000   1.91088136
  0.95900000   2.55685060
  0.95900000   1.91089239
  0.95900000   2.55684724
  0.95900000   1.91088850
  0.95900000   2.55684027
  0.95900000   1.91089221
  0.95900000   2.55683606
  0.95900000   1.91089176
  0.95900000   2.55683114
  0.95900000   1.91089333
  0.95900000   2.55682724
  0.95910000   2.55757543
  0.95910000   1.91002473
  0.95910000   2.55772881
  0.95910000   1.90972312
  0.95910000   2.55762835
  0.95910000   1.90988707
  0.95910000   2.55766526
  0.95910000   1.90980344
  0.95910000   2.55763146
  0.95910000   1.90985067
  0.95910000   2.55763693
  0.95910000   1.90982809
  0.95910000   2.55762303
  0.95910000   1.90984221
  0.95910000   2.55762062
  0.95910000   1.90983661
  0.95910000   2.55761315
  0.95910000   1.90984125
  0.95910000   2.55760923
  0.95910000   1.90984028
  0.95910000   2.55760417
  0.95910000   1.90984213
  0.95910000   2.55760037
  0.95920000   2.55832314
  0.95920000   1.90901858
  0.95920000   2.55851291
  0.95920000   1.90865075
  0.95920000   2.55839198
  0.95920000   1.90885204
  0.95920000   2.55844047
  0.95920000   1.90874733
  0.95920000   2.55840020
  0.95920000   1.90880638
  0.95920000   2.55840934
  0.95920000   1.90877716
  0.95920000   2.55839342
  0.95920000   1.90879498
  0.95920000   2.55839217
  0.95920000   1.90878730
  0.95920000   2.55838407
  0.95920000   1.90879309
  0.95920000   2.55838052
  0.95920000   1.90879147
  0.95920000   2.55837528
  0.95920000   1.90879367
  0.95920000   2.55837159
  0.95930000   2.55906756
  0.95930000   1.90801768
  0.95930000   2.55929614
  0.95930000   1.90757918
  0.95930000   2.55915298
  0.95930000   1.90782104
  0.95930000   2.55921428
  0.95930000   1.90769305
  0.95930000   2.55916675
  0.95930000   1.90776536
  0.95930000   2.55918006
  0.95930000   1.90772857
  0.95930000   2.55916181
  0.95930000   1.90775068
  0.95930000   2.55916190
  0.95930000   1.90774056
  0.95930000   2.55915307
  0.95930000   1.90774771
  0.95930000   2.55914995
  0.95930000   1.90774531
  0.95930000   2.55914448
  0.95930000   1.90774794
  0.95930000   2.55914094
  0.95940000   2.55980985
  0.95940000   1.90701993
  0.95940000   2.56007794
  0.95940000   1.90650951
  0.95940000   2.55991171
  0.95940000   1.90679346
  0.95940000   2.55998654
  0.95940000   1.90664085
  0.95940000   2.55993120
  0.95940000   1.90672745
  0.95940000   2.55994907
  0.95940000   1.90668237
  0.95940000   2.55992821
  0.95940000   1.90670925
  0.95940000   2.55992983
  0.95940000   1.90669637
  0.95940000   2.55992015
  0.95940000   1.90670510
  0.95940000   2.55991754
  0.95940000   1.90670179
  0.95940000   2.55991180
  0.95940000   1.90670493
  0.95940000   2.55990842
  0.95950000   2.56055178
  0.95950000   1.90602214
  0.95950000   2.56085736
  0.95950000   1.90544346
  0.95950000   2.56066871
  0.95950000   1.90576834
  0.95950000   2.56075700
  0.95950000   1.90559124
  0.95950000   2.56069371
  0.95950000   1.90569235
  0.95950000   2.56071631
  0.95950000   1.90563868
  0.95950000   2.56069271
  0.95950000   1.90567059
  0.95950000   2.56069597
  0.95950000   1.90565476
  0.95950000   2.56068535
  0.95950000   1.90566520
  0.95950000   2.56068331
  0.95950000   1.90566088
  0.95950000   2.56067726
  0.95950000   1.90566460
  0.95950000   2.56067408
  0.95960000   2.56129585
  0.95960000   1.90501977
  0.95960000   2.56163300
  0.95960000   1.90438360
  0.95960000   2.56142480
  0.95960000   1.90474418
  0.95960000   2.56152521
  0.95960000   1.90454505
  0.95960000   2.56145457
  0.95960000   1.90465958
  0.95960000   2.56148167
  0.95960000   1.90459775
  0.95960000   2.56145539
  0.95960000   1.90463456
  0.95960000   2.56146028
  0.95960000   1.90461578
  0.95960000   2.56144872
  0.95960000   1.90462797
  0.95960000   2.56144726
  0.95960000   1.90462261
  0.95960000   2.56144088
  0.95960000   1.90462694
  0.95960000   2.56143791
  0.95970000   2.56204555
  0.95970000   1.90400647
  0.95970000   2.56240287
  0.95970000   1.90333360
  0.95970000   2.56218120
  0.95970000   1.90371881
  0.95970000   2.56229050
  0.95970000   1.90350349
  0.95970000   2.56221420
  0.95970000   1.90362839
  0.95970000   2.56224493
  0.95970000   1.90355999
  0.95970000   2.56221642
  0.95970000   1.90360090
  0.95970000   2.56222272
  0.95970000   1.90357956
  0.95970000   2.56221031
  0.95970000   1.90359331
  0.95970000   2.56220939
  0.95970000   1.90358699
  0.95970000   2.56220270
  0.95970000   1.90359189
  0.95970000   2.56219993
  0.95980000   2.56280556
  0.95980000   1.90297374
  0.95980000   2.56316418
  0.95980000   1.90229854
  0.95980000   2.56293960
  0.95980000   1.90268913
  0.95980000   2.56305190
  0.95980000   1.90246839
  0.95980000   2.56297321
  0.95980000   1.90259769
  0.95980000   2.56300575
  0.95980000   1.90252600
  0.95980000   2.56297600
  0.95980000   1.90256920
  0.95980000   2.56298317
  0.95980000   1.90254630
  0.95980000   2.56297022
  0.95980000   1.90256107
  0.95980000   2.56296967
  0.95980000   1.90255408
  0.95980000   2.56296277
  0.95980000   1.90255940
  0.95980000   2.56296015
  0.95990000   2.56358200
  0.95990000   1.90191043
  0.95990000   2.56391322
  0.95990000   1.90128520
  0.95990000   2.56370232
  0.95990000   1.90165095
  0.95990000   2.56380803
  0.95990000   1.90144226
  0.95990000   2.56373247
  0.95990000   1.90156590
  0.95990000   2.56376366
  0.95990000   1.90149671
  0.95990000   2.56373448
  0.95990000   1.90153889
  0.95990000   2.56374149
  0.95990000   1.90151632
  0.95990000   2.56372857
  0.95990000   1.90153103
  0.95990000   2.56372807
  0.95990000   1.90152398
  0.95990000   2.56372113
  0.95990000   1.90152938
  0.95990000   2.56371857
  0.96000000   2.56438251
  0.96000000   1.90080263
  0.96000000   2.56464522
  0.96000000   1.90030230
  0.96000000   2.56447236
  0.96000000   1.90059881
  0.96000000   2.56455704
  0.96000000   1.90042848
  0.96000000   2.56449314
  0.96000000   1.90053093
  0.96000000   2.56451795
  0.96000000   1.90047340
  0.96000000   2.56449231
  0.96000000   1.90050917
  0.96000000   2.56449741
  0.96000000   1.90049009
  0.96000000   2.56448556
  0.96000000   1.90050289
  0.96000000   2.56448450
  0.96000000   1.90049686
  0.96000000   2.56447788
  0.96000000   1.90050170
  0.96000000   2.56447516
  0.96010000   2.56521581
  0.96010000   1.89963445
  0.96010000   2.56535456
  0.96010000   1.89936010
  0.96010000   2.56525335
  0.96010000   1.89952612
  0.96010000   2.56529667
  0.96010000   1.89943121
  0.96010000   2.56525670
  0.96010000   1.89949010
  0.96010000   2.56526773
  0.96010000   1.89945770
  0.96010000   2.56525008
  0.96010000   1.89947896
  0.96010000   2.56525060
  0.96010000   1.89946824
  0.96010000   2.56524141
  0.96010000   1.89947621
  0.96010000   2.56523884
  0.96010000   1.89947296
  0.96010000   2.56523311
  0.96010000   1.89947619
  0.96010000   2.56522990
  0.96020000   2.56609029
  0.96020000   1.89839064
  0.96020000   2.56603555
  0.96020000   1.89846899
  0.96020000   2.56604904
  0.96020000   1.89842605
  0.96020000   2.56602446
  0.96020000   1.89845495
  0.96020000   2.56602477
  0.96020000   1.89844048
  0.96020000   2.56601198
  0.96020000   1.89845152
  0.96020000   2.56600847
  0.96020000   1.89844702
  0.96020000   2.56600065
  0.96020000   1.89845155
  0.96020000   2.56599643
  0.96020000   1.89845048
  0.96020000   2.56599094
  0.96020000   1.89845258
  0.96020000   2.56598696
  0.96020000   1.89845264
  0.96020000   2.56598273
  0.96030000   2.56701059
  0.96030000   1.89706271
  0.96030000   2.56668442
  0.96030000   1.89763582
  0.96030000   2.56686212
  0.96030000   1.89729372
  0.96030000   2.56673849
  0.96030000   1.89750317
  0.96030000   2.56679869
  0.96030000   1.89737961
  0.96030000   2.56674980
  0.96030000   1.89745650
  0.96030000   2.56676813
  0.96030000   1.89741223
  0.96030000   2.56674715
  0.96030000   1.89744076
  0.96030000   2.56675091
  0.96030000   1.89742519
  0.96030000   2.56674062
  0.96030000   1.89743603
  0.96030000   2.56673956
  0.96030000   1.89743080
  0.96030000   2.56673359
  0.96040000   2.56797193
  0.96040000   1.89565939
  0.96040000   2.56730303
  0.96040000   1.89685726
  0.96040000   2.56769191
  0.96040000   1.89613038
  0.96040000   2.56743884
  0.96040000   1.89657581
  0.96040000   2.56757866
  0.96040000   1.89630718
  0.96040000   2.56748096
  0.96040000   1.89647307
  0.96040000   2.56752930
  0.96040000   1.89637414
  0.96040000   2.56748994
  0.96040000   1.89643619
  0.96040000   2.56750500
  0.96040000   1.89640004
  0.96040000   2.56748781
  0.96040000   1.89642349
  0.96040000   2.56749101
  0.96040000   1.89641052
  0.96040000   2.56748245
  0.96050000   2.56895252
  0.96050000   1.89422045
  0.96050000   2.56790390
  0.96050000   1.89611049
  0.96050000   2.56853115
  0.96050000   1.89494926
  0.96050000   2.56812962
  0.96050000   1.89566532
  0.96050000   2.56836235
  0.96050000   1.89522745
  0.96050000   2.56820677
  0.96050000   1.89549884
  0.96050000   2.56829129
  0.96050000   1.89533403
  0.96050000   2.56822942
  0.96050000   1.89543714
  0.96050000   2.56825854
  0.96050000   1.89537538
  0.96050000   2.56823262
  0.96050000   1.89541478
  0.96050000   2.56824128
  0.96050000   1.89539186
  0.96050000   2.56822933
  0.96060000   2.56990614
  0.96060000   1.89283011
  0.96060000   2.56851570
  0.96060000   1.89534324
  0.96060000   2.56936244
  0.96060000   1.89378210
  0.96060000   2.56882152
  0.96060000   1.89475228
  0.96060000   2.56914331
  0.96060000   1.89415216
  0.96060000   2.56893118
  0.96060000   1.89452666
  0.96060000   2.56905173
  0.96060000   1.89429622
  0.96060000   2.56896702
  0.96060000   1.89444099
  0.96060000   2.56901069
  0.96060000   1.89435277
  0.96060000   2.56897557
  0.96060000   1.89440894
  0.96060000   2.56899008
  0.96060000   1.89437538
  0.96060000   2.56897445
  0.96070000   2.57075508
  0.96070000   1.89163000
  0.96070000   2.56918874
  0.96070000   1.89446383
  0.96070000   2.57015452
  0.96070000   1.89268589
  0.96070000   2.56953443
  0.96070000   1.89380042
  0.96070000   2.56990911
  0.96070000   1.89310399
  0.96070000   2.56966205
  0.96070000   1.89354221
  0.96070000   2.56980575
  0.96070000   1.89326964
  0.96070000   2.56970585
  0.96070000   1.89344212
  0.96070000   2.56975952
  0.96070000   1.89333568
  0.96070000   2.56971788
  0.96070000   1.89340377
  0.96070000   2.56973668
  0.96070000   1.89336242
  0.96070000   2.56971828
  0.96080000   2.57137615
  0.96080000   1.89084463
  0.96080000   2.57000451
  0.96080000   1.89332378
  0.96080000   2.57085553
  0.96080000   1.89175516
  0.96080000   2.57030214
  0.96080000   1.89274823
  0.96080000   2.57063816
  0.96080000   1.89212232
  0.96080000   2.57041334
  0.96080000   1.89252006
  0.96080000   2.57054440
  0.96080000   1.89227056
  0.96080000   2.57045166
  0.96080000   1.89243004
  0.96080000   2.57050140
  0.96080000   1.89233081
  0.96080000   2.57046193
  0.96080000   1.89239495
  0.96080000   2.57047960
  0.96080000   1.89235570
  0.96080000   2.57046180
  0.96090000   2.57158553
  0.96090000   1.89080889
  0.96090000   2.57108407
  0.96090000   1.89170246
  0.96090000   2.57138567
  0.96090000   1.89113529
  0.96090000   2.57117710
  0.96090000   1.89150005
  0.96090000   2.57129601
  0.96090000   1.89126990
  0.96090000   2.57120766
  0.96090000   1.89141902
  0.96090000   2.57125293
  0.96090000   1.89132592
  0.96090000   2.57121415
  0.96090000   1.89138710
  0.96090000   2.57123000
  0.96090000   1.89134967
  0.96090000   2.57121186
  0.96090000   1.89137497
  0.96090000   2.57121615
  0.96090000   1.89136012
  0.96090000   2.57120679
  0.96100000   2.57125548
  0.96100000   1.89175557
  0.96100000   2.57250757
  0.96100000   1.88945384
  0.96100000   2.57168499
  0.96100000   1.89093549
  0.96100000   2.57219931
  0.96100000   1.88998305
  0.96100000   2.57185443
  0.96100000   1.89059818
  0.96100000   2.57206412
  0.96100000   1.89020424
  0.96100000   2.57191814
  0.96100000   1.89045973
  0.96100000   2.57200225
  0.96100000   1.89029702
  0.96100000   2.57193925
  0.96100000   1.89040331
  0.96100000   2.57197179
  0.96100000   1.89033632
  0.96100000   2.57194358
  0.96100000   1.89038071
  0.96100000   2.57195511
  0.96110000   2.57086234
  0.96110000   1.89281657
  0.96110000   2.57396603
  0.96110000   1.88714103
  0.96110000   2.57194473
  0.96110000   1.89080717
  0.96110000   2.57324680
  0.96110000   1.88841946
  0.96110000   2.57238935
  0.96110000   1.88996872
  0.96110000   2.57293477
  0.96110000   1.88896312
  0.96110000   2.57256995
  0.96110000   1.88961745
  0.96110000   2.57279719
  0.96110000   1.88919400
  0.96110000   2.57264085
  0.96110000   1.88947042
  0.96110000   2.57273441
  0.96110000   1.88929229
  0.96110000   2.57266642
  0.96110000   1.88940920
  0.96110000   2.57270395
  0.96120000   2.57217967
  0.96120000   1.89075895
  0.96120000   2.57434329
  0.96120000   1.88679741
  0.96120000   2.57291386
  0.96120000   1.88938537
  0.96120000   2.57383734
  0.96120000   1.88768791
  0.96120000   2.57321955
  0.96120000   1.88880059
  0.96120000   2.57361251
  0.96120000   1.88807298
  0.96120000   2.57334436
  0.96120000   1.88855127
  0.96120000   2.57351033
  0.96120000   1.88823954
  0.96120000   2.57339284
  0.96120000   1.88844523
  0.96120000   2.57346186
  0.96120000   1.88831187
  0.96120000   2.57340943
  0.96120000   1.88840048
  0.96120000   2.57343719
  0.96130000   2.57715216
  0.96130000   1.88204071
  0.96130000   2.57224170
  0.96130000   1.89096960
  0.96130000   2.57549815
  0.96130000   1.88501976
  0.96130000   2.57334457
  0.96130000   1.88892937
  0.96130000   2.57475988
  0.96130000   1.88633782
  0.96130000   2.57381512
  0.96130000   1.88804788
  0.96130000   2.57442975
  0.96130000   1.88691780
  0.96130000   2.57401444
  0.96130000   1.88766536
  0.96130000   2.57428035
  0.96130000   1.88717257
  0.96130000   2.57409686
  0.96130000   1.88749938
  0.96130000   2.57421096
  0.96130000   1.88728463
  0.96130000   2.57412904
  0.96140000   2.56963515
  0.96140000   1.89607478
  0.96140000   2.57832979
  0.96140000   1.88021600
  0.96140000   2.57262385
  0.96140000   1.89059727
  0.96140000   2.57644982
  0.96140000   1.88361292
  0.96140000   2.57390603
  0.96140000   1.88823556
  0.96140000   2.57559760
  0.96140000   1.88514270
  0.96140000   2.57446352
  0.96140000   1.88719917
  0.96140000   2.57521150
  0.96140000   1.88582751
  0.96140000   2.57470527
  0.96140000   1.88674178
  0.96140000   2.57503521
  0.96140000   1.88613331
  0.96140000   2.57480845
  0.96140000   1.88653973
  0.96140000   2.57495316
  0.96150000   1.88447007
  0.96150000   2.57534229
  0.96150000   1.88599451
  0.96150000   2.57590182
  0.96150000   1.88496680
  0.96150000   2.57551664
  0.96150000   1.88565789
  0.96150000   2.57576495
  0.96150000   1.88519468
  0.96150000   2.57558749
  0.96150000   1.88550764
  0.96150000   2.57569678
  0.96150000   1.88529894
  0.96150000   2.57561407
  0.96150000   1.88544076
  0.96150000   2.57566114
  0.96150000   1.88534690
  0.96150000   2.57562170
  0.96150000   1.88541132
  0.96150000   2.57564105
  0.96150000   1.88536926
  0.96150000   2.57562147
  0.96150000   1.88539865
  0.96160000   1.88840720
  0.96160000   2.57789112
  0.96160000   1.88171533
  0.96160000   2.57540711
  0.96160000   1.88622414
  0.96160000   2.57708214
  0.96160000   1.88315792
  0.96160000   2.57593606
  0.96160000   1.88523254
  0.96160000   2.57670171
  0.96160000   1.88382595
  0.96160000   2.57617221
  0.96160000   1.88477996
  0.96160000   2.57652122
  0.96160000   1.88413464
  0.96160000   2.57627571
  0.96160000   1.88457329
  0.96160000   2.57643388
  0.96160000   1.88427736
  0.96160000   2.57631921
  0.96160000   1.88447913
  0.96160000   2.57639007
  0.96160000   1.88434357
  0.96170000   1.87657247
  0.96170000   2.57451009
  0.96170000   1.88822268
  0.96170000   2.57891236
  0.96170000   1.88018525
  0.96170000   2.57591041
  0.96170000   1.88563784
  0.96170000   2.57795691
  0.96170000   1.88189619
  0.96170000   2.57655027
  0.96170000   1.88444633
  0.96170000   2.57750203
  0.96170000   1.88270180
  0.96170000   2.57684238
  0.96170000   1.88389371
  0.96170000   2.57728426
  0.96170000   1.88308007
  0.96170000   2.57697417
  0.96170000   1.88363702
  0.96170000   2.57717851
  0.96170000   1.88325763
  0.96170000   2.57703201
  0.96170000   1.88351793
  0.96180000   1.88352415
  0.96180000   2.57830362
  0.96180000   1.88165588
  0.96180000   2.57758614
  0.96180000   1.88294476
  0.96180000   2.57806388
  0.96180000   1.88205885
  0.96180000   2.57771992
  0.96180000   1.88267150
  0.96180000   2.57794372
  0.96180000   1.88225161
  0.96180000   2.57777782
  0.96180000   1.88254288
  0.96180000   2.57788163
  0.96180000   1.88234405
  0.96180000   2.57780071
  0.96180000   1.88248264
  0.96180000   2.57784796
  0.96180000   1.88238865
  0.96180000   2.57780773
  0.96180000   1.88245471
  0.96180000   2.57782845
  0.96180000   1.88241041
  0.96190000   1.88710207
  0.96190000   2.58071696
  0.96190000   1.87760518
  0.96190000   2.57711495
  0.96190000   1.88414662
  0.96190000   2.57961244
  0.96190000   1.87958183
  0.96190000   2.57786962
  0.96190000   1.88274187
  0.96190000   2.57906969
  0.96190000   1.88054383
  0.96190000   2.57822601
  0.96190000   1.88206939
  0.96190000   2.57880202
  0.96190000   1.88101051
  0.96190000   2.57839293
  0.96190000   1.88174675
  0.96190000   2.57866861
  0.96190000   1.88123671
  0.96190000   2.57846955
  0.96190000   1.88159202
  0.96190000   2.57860077
  0.96190000   1.88134645
  0.96200000   1.88548477
  0.96200000   2.58122767
  0.96200000   1.87701825
  0.96200000   2.57798509
  0.96200000   1.88290434
  0.96200000   2.58024789
  0.96200000   1.87876729
  0.96200000   2.57865398
  0.96200000   1.88165575
  0.96200000   2.57975874
  0.96200000   1.87963146
  0.96200000   2.57897478
  0.96200000   1.88104806
  0.96200000   2.57951346
  0.96200000   1.88005726
  0.96200000   2.57912721
  0.96200000   1.88075181
  0.96200000   2.57938909
  0.96200000   1.88026692
  0.96200000   2.57919811
  0.96200000   1.88060747
  0.96200000   2.57932473
  0.96200000   1.88037029
  0.96210000   1.88131156
  0.96210000   2.58076906
  0.96210000   1.87819519
  0.96210000   2.57955211
  0.96210000   1.88039243
  0.96210000   2.58039432
  0.96210000   1.87884267
  0.96210000   2.57978526
  0.96210000   1.87993755
  0.96210000   2.58020165
  0.96210000   1.87916690
  0.96210000   2.57989602
  0.96210000   1.87971238
  0.96210000   2.58010098
  0.96210000   1.87932931
  0.96210000   2.57994685
  0.96210000   1.87960112
  0.96210000   2.58004695
  0.96210000   1.87941085
  0.96210000   2.57996854
  0.96210000   1.87954638
  0.96210000   2.58001675
  0.96210000   1.87945199
  0.96220000   1.87688968
  0.96220000   2.58015256
  0.96220000   1.87965946
  0.96220000   2.58122422
  0.96220000   1.87768952
  0.96220000   2.58044530
  0.96220000   1.87909142
  0.96220000   2.58098401
  0.96220000   1.87809643
  0.96220000   2.58058756
  0.96220000   1.87880577
  0.96220000   2.58085743
  0.96220000   1.87830336
  0.96220000   2.58065487
  0.96220000   1.87866228
  0.96220000   2.58078926
  0.96220000   1.87840875
  0.96220000   2.58068508
  0.96220000   1.87859043
  0.96220000   2.58075130
  0.96220000   1.87846262
  0.96220000   2.58069712
  0.96220000   1.87855467
  0.96230000   1.87351835
  0.96230000   2.57990042
  0.96230000   1.88046019
  0.96230000   2.58263392
  0.96230000   1.87546475
  0.96230000   2.58066479
  0.96230000   1.87903301
  0.96230000   2.58206345
  0.96230000   1.87647253
  0.96230000   2.58104958
  0.96230000   1.87830569
  0.96230000   2.58176469
  0.96230000   1.87699279
  0.96230000   2.58124212
  0.96230000   1.87793422
  0.96230000   2.58160703
  0.96230000   1.87726106
  0.96230000   2.58133708
  0.96230000   1.87774449
  0.96230000   2.58152264
  0.96230000   1.87739944
  0.96230000   2.58138263
  0.96230000   1.87764773
  0.96240000   1.87133637
  0.96240000   2.58010753
  0.96240000   1.88042422
  0.96240000   2.58372189
  0.96240000   1.87382567
  0.96240000   2.58110749
  0.96240000   1.87856784
  0.96240000   2.58298513
  0.96240000   1.87513574
  0.96240000   2.58161938
  0.96240000   1.87760912
  0.96240000   2.58259468
  0.96240000   1.87582275
  0.96240000   2.58188080
  0.96240000   1.87711226
  0.96240000   2.58238680
  0.96240000   1.87618237
  0.96240000   2.58201314
  0.96240000   1.87685451
  0.96240000   2.58227505
  0.96240000   1.87637054
  0.96240000   2.58207894
  0.96240000   1.87672090
  0.96250000   1.87011946
  0.96250000   2.58070630
  0.96250000   1.87967456
  0.96250000   2.58453645
  0.96250000   1.87268402
  0.96250000   2.58174679
  0.96250000   1.87774443
  0.96250000   2.58376659
  0.96250000   1.87405400
  0.96250000   2.58228771
  0.96250000   1.87673292
  0.96250000   2.58335285
  0.96250000   1.87478326
  0.96250000   2.58256849
  0.96250000   1.87620087
  0.96250000   2.58312966
  0.96250000   1.87517071
  0.96250000   2.58271317
  0.96250000   1.87592069
  0.96250000   2.58300824
  0.96250000   1.87537644
  0.96250000   2.58278660
  0.96250000   1.87577321
  0.96260000   1.86968938
  0.96260000   2.58163311
  0.96260000   1.87832720
  0.96260000   2.58511796
  0.96260000   1.87196609
  0.96260000   2.58255774
  0.96260000   1.87660830
  0.96260000   2.58442317
  0.96260000   1.87319933
  0.96260000   2.58304579
  0.96260000   1.87569315
  0.96260000   2.58404418
  0.96260000   1.87386526
  0.96260000   2.58330280
  0.96260000   1.87520445
  0.96260000   2.58383660
  0.96260000   1.87422424
  0.96260000   2.58343708
  0.96260000   1.87494324
  0.96260000   2.58372192
  0.96260000   1.87441768
  0.96260000   2.58350616
  0.96260000   1.87480370
  0.96270000   1.86991073
  0.96270000   2.58283375
  0.96270000   1.87648120
  0.96270000   2.58549769
  0.96270000   1.87161491
  0.96270000   2.58351949
  0.96270000   1.87519756
  0.96270000   2.58496668
  0.96270000   1.87255014
  0.96270000   2.58388655
  0.96270000   1.87450279
  0.96270000   2.58467226
  0.96270000   1.87306214
  0.96270000   2.58408207
  0.96270000   1.87412606
  0.96270000   2.58450806
  0.96270000   1.87334215
  0.96270000   2.58418510
  0.96270000   1.87392175
  0.96270000   2.58441552
  0.96270000   1.87349529
  0.96270000   2.58423834
  0.96270000   1.87381106
  0.96280000   1.87060895
  0.96280000   2.58423313
  0.96280000   1.87427372
  0.96280000   2.58572161
  0.96280000   1.87154679
  0.96280000   2.58459837
  0.96280000   1.87357371
  0.96280000   2.58541825
  0.96280000   1.87206793
  0.96280000   2.58479533
  0.96280000   1.87318859
  0.96280000   2.58524625
  0.96280000   1.87235722
  0.96280000   2.58490028
  0.96280000   1.87297671
  0.96280000   2.58514768
  0.96280000   1.87251781
  0.96280000   2.58495505
  0.96280000   1.87286026
  0.96280000   2.58509026
  0.96280000   1.87260706
  0.96280000   2.58498256
  0.96280000   1.87279641
  0.96290000   1.87155540
  0.96290000   2.58573279
  0.96290000   1.87188437
  0.96290000   2.58585553
  0.96290000   1.87164211
  0.96290000   2.58574491
  0.96290000   1.87182693
  0.96290000   2.58581154
  0.96290000   1.87169149
  0.96290000   2.58574753
  0.96290000   1.87179540
  0.96290000   2.58578301
  0.96290000   1.87171980
  0.96290000   2.58574542
  0.96290000   1.87177831
  0.96290000   2.58576371
  0.96290000   1.87173622
  0.96290000   2.58574117
  0.96290000   1.87176924
  0.96290000   2.58575005
  0.96290000   1.87174587
  0.96290000   2.58573615
  0.96290000   1.87176458
  0.96300000   1.87251891
  0.96300000   2.58723552
  0.96300000   1.86949025
  0.96300000   2.58596934
  0.96300000   1.87177376
  0.96300000   2.58690650
  0.96300000   1.87005306
  0.96300000   2.58618442
  0.96300000   1.87135191
  0.96300000   2.58671504
  0.96300000   1.87037445
  0.96300000   2.58630280
  0.96300000   1.87111307
  0.96300000   2.58660263
  0.96300000   1.87055794
  0.96300000   2.58636682
  0.96300000   1.87097795
  0.96300000   2.58653575
  0.96300000   1.87066279
  0.96300000   2.58640043
  0.96300000   1.87090165
  0.96300000   2.58649516
  0.96300000   1.87072281
  0.96310000   1.87332449
  0.96310000   2.58867028
  0.96310000   1.86722053
  0.96310000   2.58611819
  0.96310000   1.87184145
  0.96310000   2.58804192
  0.96310000   1.86832711
  0.96310000   2.58656818
  0.96310000   1.87099233
  0.96310000   2.58767444
  0.96310000   1.86896836
  0.96310000   2.58682315
  0.96310000   1.87050509
  0.96310000   2.58745883
  0.96310000   1.86933943
  0.96310000   2.58696675
  0.96310000   1.87022531
  0.96310000   2.58733156
  0.96310000   1.86955406
  0.96310000   2.58704675
  0.96310000   1.87006469
  0.96310000   2.58725569
  0.96310000   1.86967823
  0.96320000   1.87387538
  0.96320000   2.58999976
  0.96320000   1.86514291
  0.96320000   2.58633437
  0.96320000   1.87178646
  0.96320000   2.58912722
  0.96320000   1.86669259
  0.96320000   2.58698228
  0.96320000   1.87057735
  0.96320000   2.58861101
  0.96320000   1.86760390
  0.96320000   2.58735567
  0.96320000   1.86987482
  0.96320000   2.58830523
  0.96320000   1.86813877
  0.96320000   2.58757029
  0.96320000   1.86946596
  0.96320000   2.58812348
  0.96320000   1.86845237
  0.96320000   2.58769291
  0.96320000   1.86922789
  0.96320000   2.58801480
  0.96320000   1.86863617
  0.96330000   1.87413868
  0.96330000   2.59121266
  0.96330000   1.86327769
  0.96330000   2.58663087
  0.96330000   1.87158515
  0.96330000   2.59015282
  0.96330000   1.86516684
  0.96330000   2.58743575
  0.96330000   1.87009058
  0.96330000   2.58951778
  0.96330000   1.86629373
  0.96330000   2.58790635
  0.96330000   1.86921137
  0.96330000   2.58913715
  0.96330000   1.86696447
  0.96330000   2.58818128
  0.96330000   1.86869293
  0.96330000   2.58890855
  0.96330000   1.86736315
  0.96330000   2.58834130
  0.96330000   1.86838693
  0.96330000   2.58877068
  0.96330000   1.86759996
  0.96340000   1.87411685
  0.96340000   2.59231120
  0.96340000   1.86162058
  0.96340000   2.58700975
  0.96340000   1.87123379
  0.96340000   2.59111707
  0.96340000   1.86375278
  0.96340000   2.58793149
  0.96340000   1.86952676
  0.96340000   2.59039227
  0.96340000   1.86504233
  0.96340000   2.58847782
  0.96340000   1.86850998
  0.96340000   2.58995240
  0.96340000   1.86582052
  0.96340000   2.58880174
  0.96340000   1.86790258
  0.96340000   2.58968512
  0.96340000   1.86628938
  0.96340000   2.58899333
  0.96340000   1.86753927
  0.96340000   2.58952222
  0.96340000   1.86657164
  0.96350000   1.87382314
  0.96350000   2.59330107
  0.96350000   1.86016110
  0.96350000   2.58746969
  0.96350000   1.87073479
  0.96350000   2.59202063
  0.96350000   1.86244916
  0.96350000   2.58847050
  0.96350000   1.86888412
  0.96350000   2.59123338
  0.96350000   1.86385169
  0.96350000   2.58907166
  0.96350000   1.86776780
  0.96350000   2.59074955
  0.96350000   1.86470952
  0.96350000   2.58943313
  0.96350000   1.86709227
  0.96350000   2.59045195
  0.96350000   1.86523334
  0.96350000   2.58965014
  0.96350000   1.86668285
  0.96350000   2.59026849
  0.96350000   1.86555291
  0.96360000   1.87326705
  0.96360000   2.59418561
  0.96360000   1.85889297
  0.96360000   2.58801064
  0.96360000   1.87008827
  0.96360000   2.59286293
  0.96360000   1.86125688
  0.96360000   2.58905457
  0.96360000   1.86815943
  0.96360000   2.59203932
  0.96360000   1.86272502
  0.96360000   2.58968999
  0.96360000   1.86698103
  0.96360000   2.59152669
  0.96360000   1.86363491
  0.96360000   2.59007730
  0.96360000   1.86625867
  0.96360000   2.59120746
  0.96360000   1.86419790
  0.96360000   2.59031315
  0.96360000   1.86581511
  0.96360000   2.59100830
  0.96360000   1.86454591
  0.96370000   1.87244916
  0.96370000   2.59496383
  0.96370000   1.85781779
  0.96370000   2.58863566
  0.96370000   1.86928872
  0.96370000   2.59364088
  0.96370000   1.86018152
  0.96370000   2.58968747
  0.96370000   1.86734588
  0.96370000   2.59280667
  0.96370000   1.86166849
  0.96370000   2.59033622
  0.96370000   1.86614349
  0.96370000   2.59228087
  0.96370000   1.86260205
  0.96370000   2.59073699
  0.96370000   1.86539682
  0.96370000   2.59194935
  0.96370000   1.86318725
  0.96370000   2.59098440
  0.96370000   1.86493236
  0.96370000   2.59173999
  0.96370000   1.86355369
  0.96380000   1.87136223
  0.96380000   2.59563082
  0.96380000   1.85694432
  0.96380000   2.58935073
  0.96380000   1.86832537
  0.96380000   2.59434882
  0.96380000   1.85923323
  0.96380000   2.59037497
  0.96380000   1.86643304
  0.96380000   2.59353032
  0.96380000   1.86069134
  0.96380000   2.59101517
  0.96380000   1.86524644
  0.96380000   2.59300795
  0.96380000   1.86161847
  0.96380000   2.59141593
  0.96380000   1.86449998
  0.96380000   2.59267446
  0.96380000   1.86220710
  0.96380000   2.59166665
  0.96380000   1.86402961
  0.96380000   2.59246126
  0.96380000   1.86258044
  0.96390000   1.86999605
  0.96390000   2.59617955
  0.96390000   1.85628517
  0.96390000   2.59016327
  0.96390000   1.86718484
  0.96390000   2.59497960
  0.96390000   1.85842488
  0.96390000   2.59112404
  0.96390000   1.86540834
  0.96390000   2.59420403
  0.96390000   1.85980483
  0.96390000   2.59173265
  0.96390000   1.86427944
  0.96390000   2.59370288
  0.96390000   1.86069325
  0.96390000   2.59211864
  0.96390000   1.86355997
  0.96390000   2.59337893
  0.96390000   1.86126444
  0.96390000   2.59236330
  0.96390000   1.86310075
  0.96390000   2.59316926
  0.96390000   1.86163131
  0.96400000   1.86834366
  0.96400000   2.59660335
  0.96400000   1.85585229
  0.96400000   2.59108003
  0.96400000   1.86585500
  0.96400000   2.59552612
  0.96400000   1.85776929
  0.96400000   2.59194155
  0.96400000   1.86425939
  0.96400000   2.59482135
  0.96400000   1.85902061
  0.96400000   2.59249464
  0.96400000   1.86323164
  0.96400000   2.59436030
  0.96400000   1.85983612
  0.96400000   2.59284998
  0.96400000   1.86256803
  0.96400000   2.59405855
  0.96400000   1.86036694
  0.96400000   2.59307808
  0.96400000   1.86213900
  0.96400000   2.59386077
  0.96400000   1.86071215
  0.96410000   1.86640746
  0.96410000   2.59689851
  0.96410000   1.85565232
  0.96410000   2.59210482
  0.96410000   1.86432916
  0.96410000   2.59598301
  0.96410000   1.85727610
  0.96410000   2.59283277
  0.96410000   1.86297675
  0.96410000   2.59537678
  0.96410000   1.85834861
  0.96410000   2.59330637
  0.96410000   1.86209365
  0.96410000   2.59497528
  0.96410000   1.85905600
  0.96410000   2.59361451
  0.96410000   1.86151593
  0.96410000   2.59470918
  0.96410000   1.85952205
  0.96410000   2.59381472
  0.96410000   1.86113763
  0.96410000   2.59453252
  0.96410000   1.85982889
  0.96420000   1.86420373
  0.96420000   2.59706655
  0.96420000   1.85568248
  0.96420000   2.59323658
  0.96420000   1.86260954
  0.96420000   2.59634830
  0.96420000   1.85694882
  0.96420000   2.59379995
  0.96420000   1.86155650
  0.96420000   2.59586693
  0.96420000   1.85779491
  0.96420000   2.59417127
  0.96420000   1.86085936
  0.96420000   2.59554412
  0.96420000   1.85835954
  0.96420000   2.59441578
  0.96420000   1.86039729
  0.96420000   2.59532737
  0.96420000   1.85873601
  0.96420000   2.59457646
  0.96420000   1.86009086
  0.96420000   2.59518155
  0.96420000   1.85898689
  0.96430000   1.86176434
  0.96430000   2.59711557
  0.96430000   1.85592813
  0.96430000   2.59446814
  0.96430000   1.86070943
  0.96430000   2.59662459
  0.96430000   1.85678270
  0.96430000   2.59484127
  0.96430000   1.86000212
  0.96430000   2.59629145
  0.96430000   1.85736010
  0.96430000   2.59509014
  0.96430000   1.85952743
  0.96430000   2.59606506
  0.96430000   1.85774988
  0.96430000   2.59525573
  0.96430000   1.85920869
  0.96430000   2.59591089
  0.96430000   1.85801286
  0.96430000   2.59536553
  0.96430000   1.85899465
  0.96430000   2.59580558
  0.96430000   1.85819024
  0.96440000   1.85913520
  0.96440000   2.59706043
  0.96440000   1.85636238
  0.96440000   2.59578633
  0.96440000   1.85865309
  0.96440000   2.59681944
  0.96440000   1.85676404
  0.96440000   2.59595051
  0.96440000   1.85832511
  0.96440000   2.59665349
  0.96440000   1.85703842
  0.96440000   2.59606074
  0.96440000   1.85810205
  0.96440000   2.59653876
  0.96440000   1.85722580
  0.96440000   2.59613426
  0.96440000   1.85795040
  0.96440000   2.59645906
  0.96440000   1.85735378
  0.96440000   2.59618287
  0.96440000   1.85784737
  0.96440000   2.59640338
  0.96440000   1.85744120
  0.96450000   1.85637186
  0.96450000   2.59692166
  0.96450000   1.85694816
  0.96450000   2.59717309
  0.96450000   1.85647365
  0.96450000   2.59694484
  0.96450000   1.85687110
  0.96450000   2.59711760
  0.96450000   1.85654399
  0.96450000   2.59695955
  0.96450000   1.85681810
  0.96450000   2.59707793
  0.96450000   1.85659270
  0.96450000   2.59696828
  0.96450000   1.85678175
  0.96450000   2.59704917
  0.96450000   1.85662649
  0.96450000   2.59697291
  0.96450000   1.85675689
  0.96450000   2.59702800
  0.96450000   1.85664999
  0.96450000   2.59697481
  0.96450000   1.85673995
  0.96460000   1.85353317
  0.96460000   2.59672320
  0.96460000   1.85764219
  0.96460000   2.59860760
  0.96460000   1.85420909
  0.96460000   2.59701590
  0.96460000   1.85707658
  0.96460000   2.59832974
  0.96460000   1.85468212
  0.96460000   2.59721866
  0.96460000   1.85668277
  0.96460000   2.59813432
  0.96460000   1.85501293
  0.96460000   2.59735866
  0.96460000   1.85640855
  0.96460000   2.59799655
  0.96460000   1.85524420
  0.96460000   2.59745495
  0.96460000   1.85621762
  0.96460000   2.59789912
  0.96460000   1.85540583
  0.96460000   2.59752085
  0.96460000   1.85608473
  0.96470000   1.85067494
  0.96470000   2.59648970
  0.96470000   1.85839984
  0.96470000   2.60006879
  0.96470000   1.85189786
  0.96470000   2.59704893
  0.96470000   1.85735089
  0.96470000   2.59957315
  0.96470000   1.85276467
  0.96470000   2.59744121
  0.96470000   1.85661357
  0.96470000   2.59922130
  0.96470000   1.85337847
  0.96470000   2.59771620
  0.96470000   1.85609477
  0.96470000   2.59897132
  0.96470000   1.85381278
  0.96470000   2.59790873
  0.96470000   1.85572951
  0.96470000   2.59879351
  0.96470000   1.85411991
  0.96470000   2.59804328
  0.96470000   1.85547229
  0.96480000   1.84784497
  0.96480000   2.59624405
  0.96480000   1.85917970
  0.96480000   2.60153748
  0.96480000   1.84957480
  0.96480000   2.59705972
  0.96480000   1.85766548
  0.96480000   2.60083459
  0.96480000   1.85081576
  0.96480000   2.59763769
  0.96480000   1.85659152
  0.96480000   2.60033015
  0.96480000   1.85170522
  0.96480000   2.59804758
  0.96480000   1.85582830
  0.96480000   2.59996805
  0.96480000   1.85234221
  0.96480000   2.59833828
  0.96480000   1.85528524
  0.96480000   2.59970800
  0.96480000   1.85279804
  0.96480000   2.59854433
  0.96480000   1.85489857
  0.96490000   1.84508008
  0.96490000   2.59600547
  0.96490000   1.85994690
  0.96490000   2.60299796
  0.96490000   1.84726843
  0.96490000   2.59706201
  0.96490000   1.85799544
  0.96490000   2.60210262
  0.96490000   1.84885619
  0.96490000   2.59781759
  0.96490000   1.85659943
  0.96490000   2.60145298
  0.96490000   1.85000760
  0.96490000   2.59835909
  0.96490000   1.85559774
  0.96490000   2.60098155
  0.96490000   1.85084193
  0.96490000   2.59874756
  0.96490000   1.85487764
  0.96490000   2.60063941
  0.96490000   1.85144605
  0.96490000   2.59902630
  0.96490000   1.85435940
  0.96500000   1.84240555
  0.96500000   2.59578865
  0.96500000   1.86067480
  0.96500000   2.60443856
  0.96500000   1.84499988
  0.96500000   2.59706673
  0.96500000   1.85832097
  0.96500000   2.60336825
  0.96500000   1.84690228
  0.96500000   2.59798873
  0.96500000   1.85662312
  0.96500000   2.60258326
  0.96500000   1.84829743
  0.96500000   2.59865611
  0.96500000   1.85539337
  0.96500000   2.60200740
  0.96500000   1.84932004
  0.96500000   2.59914005
  0.96500000   1.85450041
  0.96500000   2.60158494
  0.96500000   1.85006909
  0.96500000   2.59949128
  0.96500000   1.85385098
  0.96510000   1.83983611
  0.96510000   2.59560366
  0.96510000   1.86134509
  0.96510000   2.60585159
  0.96510000   1.84278297
  0.96510000   2.59708176
  0.96510000   1.85862779
  0.96510000   2.60462509
  0.96510000   1.84496562
  0.96510000   2.59815701
  0.96510000   1.85665194
  0.96510000   2.60371614
  0.96510000   1.84658361
  0.96510000   2.59894278
  0.96510000   1.85520766
  0.96510000   2.60304214
  0.96510000   1.84778286
  0.96510000   2.59951851
  0.96510000   1.85414854
  0.96510000   2.60254233
  0.96510000   1.84867128
  0.96510000   2.59994094
  0.96510000   1.85337030
  0.96520000   1.83737803
  0.96520000   2.59545652
  0.96520000   1.86194681
  0.96520000   2.60723276
  0.96520000   1.84062540
  0.96520000   2.59711220
  0.96520000   1.85890665
  0.96520000   2.60586910
  0.96520000   1.84305353
  0.96520000   2.59832646
  0.96520000   1.85667855
  0.96520000   2.60484825
  0.96520000   1.84487223
  0.96520000   2.59922210
  0.96520000   1.85503520
  0.96520000   2.60408331
  0.96520000   1.84623491
  0.96520000   2.59988495
  0.96520000   1.85381839
  0.96520000   2.60350997
  0.96520000   1.84725563
  0.96520000   2.60037647
  0.96520000   1.85291518
  0.96530000   1.83503152
  0.96530000   2.59535006
  0.96530000   1.86247474
  0.96530000   2.60858034
  0.96530000   1.83853021
  0.96530000   2.59716092
  0.96530000   1.85915232
  0.96530000   2.60709806
  0.96530000   1.84117000
  0.96530000   2.59849960
  0.96530000   1.85669843
  0.96530000   2.60597755
  0.96530000   1.84316705
  0.96530000   2.59949600
  0.96530000   1.85487249
  0.96530000   2.60512928
  0.96530000   1.84467917
  0.96530000   2.60024069
  0.96530000   1.85350756
  0.96530000   2.60448678
  0.96530000   1.84582412
  0.96530000   2.60079862
  0.96530000   1.85248427
  0.96540000   1.83279300
  0.96540000   2.59528498
  0.96540000   1.86292761
  0.96540000   2.60989430
  0.96540000   1.83649739
  0.96540000   2.59722921
  0.96540000   1.85936247
  0.96540000   2.60831106
  0.96540000   1.83931667
  0.96540000   2.59867780
  0.96540000   1.85670904
[truncated: 203,139 more chars]
