# Supplementary material for: Bifurcations of a New Fractional-Order System with a One-Scroll Chaotic Attractor
Source: Hindawi journal article supplement (doi:10.1155/2019/8341514), 2019-01-01
Supplement: f1 [file 8341514.f1.zip › 8341514.f1/q1-bifurcationdata/q1dataq095.dat]

  0.90000000   2.11232697
  0.90000000   2.11232095
  0.90000000   2.11231547
  0.90000000   2.11231045
  0.90000000   2.11230585
  0.90000000   2.11230160
  0.90000000   2.11229768
  0.90000000   2.11229403
  0.90000000   2.11229064
  0.90000000   2.11228748
  0.90000000   2.11228452
  0.90000000   2.11228174
  0.90000000   2.11227914
  0.90000000   2.11227668
  0.90000000   2.11227436
  0.90000000   2.11227218
  0.90000000   2.11227011
  0.90000000   2.11226814
  0.90000000   2.11226628
  0.90000000   2.11226450
  0.90000000   2.11226282
  0.90000000   2.11226121
  0.90000000   2.11225967
  0.90010000   2.11313037
  0.90010000   2.11312435
  0.90010000   2.11311887
  0.90010000   2.11311385
  0.90010000   2.11310924
  0.90010000   2.11310500
  0.90010000   2.11310107
  0.90010000   2.11309742
  0.90010000   2.11309403
  0.90010000   2.11309087
  0.90010000   2.11308790
  0.90010000   2.11308513
  0.90010000   2.11308252
  0.90010000   2.11308006
  0.90010000   2.11307774
  0.90010000   2.11307555
  0.90010000   2.11307348
  0.90010000   2.11307151
  0.90010000   2.11306965
  0.90010000   2.11306787
  0.90010000   2.11306619
  0.90010000   2.11306458
  0.90010000   2.11306304
  0.90020000   2.11393056
  0.90020000   2.11392454
  0.90020000   2.11391905
  0.90020000   2.11391403
  0.90020000   2.11390943
  0.90020000   2.11390518
  0.90020000   2.11390125
  0.90020000   2.11389760
  0.90020000   2.11389421
  0.90020000   2.11389104
  0.90020000   2.11388808
  0.90020000   2.11388530
  0.90020000   2.11388269
  0.90020000   2.11388023
  0.90020000   2.11387791
  0.90020000   2.11387572
  0.90020000   2.11387364
  0.90020000   2.11387168
  0.90020000   2.11386981
  0.90020000   2.11386803
  0.90020000   2.11386634
  0.90020000   2.11386473
  0.90020000   2.11386319
  0.90030000   2.11472755
  0.90030000   2.11472153
  0.90030000   2.11471605
  0.90030000   2.11471103
  0.90030000   2.11470642
  0.90030000   2.11470217
  0.90030000   2.11469824
  0.90030000   2.11469459
  0.90030000   2.11469119
  0.90030000   2.11468802
  0.90030000   2.11468506
  0.90030000   2.11468228
  0.90030000   2.11467967
  0.90030000   2.11467721
  0.90030000   2.11467488
  0.90030000   2.11467269
  0.90030000   2.11467061
  0.90030000   2.11466865
  0.90030000   2.11466678
  0.90030000   2.11466500
  0.90030000   2.11466331
  0.90030000   2.11466170
  0.90030000   2.11466016
  0.90040000   2.11552138
  0.90040000   2.11551536
  0.90040000   2.11550987
  0.90040000   2.11550485
  0.90040000   2.11550024
  0.90040000   2.11549599
  0.90040000   2.11549206
  0.90040000   2.11548841
  0.90040000   2.11548501
  0.90040000   2.11548184
  0.90040000   2.11547887
  0.90040000   2.11547609
  0.90040000   2.11547347
  0.90040000   2.11547101
  0.90040000   2.11546869
  0.90040000   2.11546650
  0.90040000   2.11546442
  0.90040000   2.11546245
  0.90040000   2.11546058
  0.90040000   2.11545880
  0.90040000   2.11545711
  0.90040000   2.11545549
  0.90040000   2.11545395
  0.90050000   2.11631206
  0.90050000   2.11630603
  0.90050000   2.11630055
  0.90050000   2.11629553
  0.90050000   2.11629091
  0.90050000   2.11628666
  0.90050000   2.11628273
  0.90050000   2.11627908
  0.90050000   2.11627568
  0.90050000   2.11627250
  0.90050000   2.11626954
  0.90050000   2.11626675
  0.90050000   2.11626414
  0.90050000   2.11626167
  0.90050000   2.11625935
  0.90050000   2.11625715
  0.90050000   2.11625507
  0.90050000   2.11625310
  0.90050000   2.11625123
  0.90050000   2.11624945
  0.90050000   2.11624776
  0.90050000   2.11624614
  0.90050000   2.11624460
  0.90060000   2.11709961
  0.90060000   2.11709358
  0.90060000   2.11708810
  0.90060000   2.11708308
  0.90060000   2.11707846
  0.90060000   2.11707421
  0.90060000   2.11707027
  0.90060000   2.11706662
  0.90060000   2.11706322
  0.90060000   2.11706004
  0.90060000   2.11705707
  0.90060000   2.11705429
  0.90060000   2.11705167
  0.90060000   2.11704920
  0.90060000   2.11704688
  0.90060000   2.11704468
  0.90060000   2.11704260
  0.90060000   2.11704063
  0.90060000   2.11703875
  0.90060000   2.11703697
  0.90060000   2.11703528
  0.90060000   2.11703366
  0.90060000   2.11703212
  0.90070000   2.11788405
  0.90070000   2.11787803
  0.90070000   2.11787254
  0.90070000   2.11786752
  0.90070000   2.11786290
  0.90070000   2.11785865
  0.90070000   2.11785471
  0.90070000   2.11785105
  0.90070000   2.11784765
  0.90070000   2.11784448
  0.90070000   2.11784150
  0.90070000   2.11783872
  0.90070000   2.11783610
  0.90070000   2.11783363
  0.90070000   2.11783130
  0.90070000   2.11782910
  0.90070000   2.11782702
  0.90070000   2.11782505
  0.90070000   2.11782317
  0.90070000   2.11782139
  0.90070000   2.11781969
  0.90070000   2.11781808
  0.90070000   2.11781653
  0.90080000   2.11866541
  0.90080000   2.11865939
  0.90080000   2.11865390
  0.90080000   2.11864887
  0.90080000   2.11864426
  0.90080000   2.11864000
  0.90080000   2.11863606
  0.90080000   2.11863241
  0.90080000   2.11862900
  0.90080000   2.11862582
  0.90080000   2.11862285
  0.90080000   2.11862006
  0.90080000   2.11861744
  0.90080000   2.11861497
  0.90080000   2.11861264
  0.90080000   2.11861044
  0.90080000   2.11860836
  0.90080000   2.11860638
  0.90080000   2.11860451
  0.90080000   2.11860272
  0.90080000   2.11860102
  0.90080000   2.11859940
  0.90080000   2.11859786
  0.90090000   2.11944371
  0.90090000   2.11943768
  0.90090000   2.11943219
  0.90090000   2.11942717
  0.90090000   2.11942255
  0.90090000   2.11941829
  0.90090000   2.11941435
  0.90090000   2.11941069
  0.90090000   2.11940728
  0.90090000   2.11940411
  0.90090000   2.11940113
  0.90090000   2.11939834
  0.90090000   2.11939572
  0.90090000   2.11939325
  0.90090000   2.11939092
  0.90090000   2.11938871
  0.90090000   2.11938663
  0.90090000   2.11938465
  0.90090000   2.11938277
  0.90090000   2.11938099
  0.90090000   2.11937929
  0.90090000   2.11937767
  0.90090000   2.11937612
  0.90100000   2.12021896
  0.90100000   2.12021293
  0.90100000   2.12020744
  0.90100000   2.12020241
  0.90100000   2.12019779
  0.90100000   2.12019353
  0.90100000   2.12018959
  0.90100000   2.12018593
  0.90100000   2.12018252
  0.90100000   2.12017934
  0.90100000   2.12017637
  0.90100000   2.12017357
  0.90100000   2.12017095
  0.90100000   2.12016848
  0.90100000   2.12016615
  0.90100000   2.12016394
  0.90100000   2.12016186
  0.90100000   2.12015988
  0.90100000   2.12015800
  0.90100000   2.12015621
  0.90100000   2.12015451
  0.90100000   2.12015289
  0.90100000   2.12015134
  0.90110000   2.12099118
  0.90110000   2.12098515
  0.90110000   2.12097966
  0.90110000   2.12097464
  0.90110000   2.12097002
  0.90110000   2.12096575
  0.90110000   2.12096181
  0.90110000   2.12095815
  0.90110000   2.12095474
  0.90110000   2.12095156
  0.90110000   2.12094858
  0.90110000   2.12094578
  0.90110000   2.12094316
  0.90110000   2.12094068
  0.90110000   2.12093835
  0.90110000   2.12093615
  0.90110000   2.12093406
  0.90110000   2.12093208
  0.90110000   2.12093020
  0.90110000   2.12092841
  0.90110000   2.12092671
  0.90110000   2.12092508
  0.90110000   2.12092353
  0.90120000   2.12176040
  0.90120000   2.12175437
  0.90120000   2.12174888
  0.90120000   2.12174385
  0.90120000   2.12173923
  0.90120000   2.12173497
  0.90120000   2.12173102
  0.90120000   2.12172736
  0.90120000   2.12172395
  0.90120000   2.12172076
  0.90120000   2.12171778
  0.90120000   2.12171499
  0.90120000   2.12171236
  0.90120000   2.12170989
  0.90120000   2.12170755
  0.90120000   2.12170534
  0.90120000   2.12170325
  0.90120000   2.12170127
  0.90120000   2.12169939
  0.90120000   2.12169760
  0.90120000   2.12169590
  0.90120000   2.12169427
  0.90120000   2.12169272
  0.90130000   2.12252664
  0.90130000   2.12252061
  0.90130000   2.12251511
  0.90130000   2.12251008
  0.90130000   2.12250546
  0.90130000   2.12250120
  0.90130000   2.12249725
  0.90130000   2.12249358
  0.90130000   2.12249017
  0.90130000   2.12248699
  0.90130000   2.12248400
  0.90130000   2.12248121
  0.90130000   2.12247858
  0.90130000   2.12247610
  0.90130000   2.12247377
  0.90130000   2.12247156
  0.90130000   2.12246947
  0.90130000   2.12246748
  0.90130000   2.12246560
  0.90130000   2.12246381
  0.90130000   2.12246210
  0.90130000   2.12246048
  0.90130000   2.12245893
  0.90140000   2.12328991
  0.90140000   2.12328388
  0.90140000   2.12327838
  0.90140000   2.12327335
  0.90140000   2.12326873
  0.90140000   2.12326446
  0.90140000   2.12326051
  0.90140000   2.12325684
  0.90140000   2.12325343
  0.90140000   2.12325024
  0.90140000   2.12324726
  0.90140000   2.12324446
  0.90140000   2.12324183
  0.90140000   2.12323935
  0.90140000   2.12323701
  0.90140000   2.12323480
  0.90140000   2.12323271
  0.90140000   2.12323073
  0.90140000   2.12322884
  0.90140000   2.12322705
  0.90140000   2.12322534
  0.90140000   2.12322372
  0.90140000   2.12322216
  0.90150000   2.12405023
  0.90150000   2.12404420
  0.90150000   2.12403870
  0.90150000   2.12403367
  0.90150000   2.12402904
  0.90150000   2.12402478
  0.90150000   2.12402083
  0.90150000   2.12401716
  0.90150000   2.12401374
  0.90150000   2.12401055
  0.90150000   2.12400757
  0.90150000   2.12400477
  0.90150000   2.12400214
  0.90150000   2.12399966
  0.90150000   2.12399732
  0.90150000   2.12399511
  0.90150000   2.12399301
  0.90150000   2.12399103
  0.90150000   2.12398914
  0.90150000   2.12398735
  0.90150000   2.12398564
  0.90150000   2.12398401
  0.90150000   2.12398246
  0.90160000   2.12480762
  0.90160000   2.12480159
  0.90160000   2.12479610
  0.90160000   2.12479106
  0.90160000   2.12478644
  0.90160000   2.12478217
  0.90160000   2.12477821
  0.90160000   2.12477454
  0.90160000   2.12477113
  0.90160000   2.12476794
  0.90160000   2.12476495
  0.90160000   2.12476215
  0.90160000   2.12475951
  0.90160000   2.12475703
  0.90160000   2.12475469
  0.90160000   2.12475248
  0.90160000   2.12475038
  0.90160000   2.12474840
  0.90160000   2.12474651
  0.90160000   2.12474471
  0.90160000   2.12474301
  0.90160000   2.12474138
  0.90160000   2.12473982
  0.90170000   2.12556211
  0.90170000   2.12555608
  0.90170000   2.12555058
  0.90170000   2.12554555
  0.90170000   2.12554092
  0.90170000   2.12553665
  0.90170000   2.12553269
  0.90170000   2.12552902
  0.90170000   2.12552560
  0.90170000   2.12552241
  0.90170000   2.12551942
  0.90170000   2.12551662
  0.90170000   2.12551398
  0.90170000   2.12551150
  0.90170000   2.12550916
  0.90170000   2.12550694
  0.90170000   2.12550485
  0.90170000   2.12550286
  0.90170000   2.12550097
  0.90170000   2.12549917
  0.90170000   2.12549746
  0.90170000   2.12549583
  0.90170000   2.12549428
  0.90180000   2.12631371
  0.90180000   2.12630768
  0.90180000   2.12630218
  0.90180000   2.12629714
  0.90180000   2.12629251
  0.90180000   2.12628824
  0.90180000   2.12628428
  0.90180000   2.12628061
  0.90180000   2.12627719
  0.90180000   2.12627400
  0.90180000   2.12627101
  0.90180000   2.12626820
  0.90180000   2.12626556
  0.90180000   2.12626308
  0.90180000   2.12626074
  0.90180000   2.12625852
  0.90180000   2.12625642
  0.90180000   2.12625443
  0.90180000   2.12625254
  0.90180000   2.12625074
  0.90180000   2.12624903
  0.90180000   2.12624740
  0.90180000   2.12624584
  0.90190000   2.12706243
  0.90190000   2.12705640
  0.90190000   2.12705090
  0.90190000   2.12704586
  0.90190000   2.12704123
  0.90190000   2.12703696
  0.90190000   2.12703300
  0.90190000   2.12702933
  0.90190000   2.12702591
  0.90190000   2.12702271
  0.90190000   2.12701972
  0.90190000   2.12701691
  0.90190000   2.12701427
  0.90190000   2.12701179
  0.90190000   2.12700944
  0.90190000   2.12700723
  0.90190000   2.12700513
  0.90190000   2.12700313
  0.90190000   2.12700124
  0.90190000   2.12699944
  0.90190000   2.12699773
  0.90190000   2.12699610
  0.90190000   2.12699454
  0.90200000   2.12780831
  0.90200000   2.12780227
  0.90200000   2.12779677
  0.90200000   2.12779174
  0.90200000   2.12778710
  0.90200000   2.12778283
  0.90200000   2.12777887
  0.90200000   2.12777519
  0.90200000   2.12777177
  0.90200000   2.12776857
  0.90200000   2.12776558
  0.90200000   2.12776277
  0.90200000   2.12776013
  0.90200000   2.12775764
  0.90200000   2.12775530
  0.90200000   2.12775308
  0.90200000   2.12775098
  0.90200000   2.12774898
  0.90200000   2.12774709
  0.90200000   2.12774529
  0.90200000   2.12774358
  0.90200000   2.12774194
  0.90200000   2.12774038
  0.90210000   2.12855135
  0.90210000   2.12854531
  0.90210000   2.12853981
  0.90210000   2.12853477
  0.90210000   2.12853014
  0.90210000   2.12852586
  0.90210000   2.12852190
  0.90210000   2.12851823
  0.90210000   2.12851480
  0.90210000   2.12851160
  0.90210000   2.12850861
  0.90210000   2.12850580
  0.90210000   2.12850315
  0.90210000   2.12850067
  0.90210000   2.12849832
  0.90210000   2.12849610
  0.90210000   2.12849399
  0.90210000   2.12849200
  0.90210000   2.12849011
  0.90210000   2.12848831
  0.90210000   2.12848659
  0.90210000   2.12848495
  0.90210000   2.12848339
  0.90220000   2.12929157
  0.90220000   2.12928554
  0.90220000   2.12928003
  0.90220000   2.12927499
  0.90220000   2.12927036
  0.90220000   2.12926608
  0.90220000   2.12926212
  0.90220000   2.12925844
  0.90220000   2.12925501
  0.90220000   2.12925181
  0.90220000   2.12924882
  0.90220000   2.12924601
  0.90220000   2.12924336
  0.90220000   2.12924087
  0.90220000   2.12923852
  0.90220000   2.12923630
  0.90220000   2.12923420
  0.90220000   2.12923220
  0.90220000   2.12923031
  0.90220000   2.12922850
  0.90220000   2.12922679
  0.90220000   2.12922515
  0.90220000   2.12922359
  0.90230000   2.13002900
  0.90230000   2.13002296
  0.90230000   2.13001746
  0.90230000   2.13001242
  0.90230000   2.13000778
  0.90230000   2.13000350
  0.90230000   2.12999954
  0.90230000   2.12999586
  0.90230000   2.12999243
  0.90230000   2.12998923
  0.90230000   2.12998623
  0.90230000   2.12998342
  0.90230000   2.12998077
  0.90230000   2.12997828
  0.90230000   2.12997593
  0.90230000   2.12997371
  0.90230000   2.12997160
  0.90230000   2.12996960
  0.90230000   2.12996771
  0.90230000   2.12996590
  0.90230000   2.12996418
  0.90230000   2.12996255
  0.90230000   2.12996098
  0.90240000   2.13076364
  0.90240000   2.13075761
  0.90240000   2.13075210
  0.90240000   2.13074706
  0.90240000   2.13074242
  0.90240000   2.13073814
  0.90240000   2.13073418
  0.90240000   2.13073049
  0.90240000   2.13072706
  0.90240000   2.13072386
  0.90240000   2.13072086
  0.90240000   2.13071805
  0.90240000   2.13071540
  0.90240000   2.13071291
  0.90240000   2.13071055
  0.90240000   2.13070833
  0.90240000   2.13070622
  0.90240000   2.13070423
  0.90240000   2.13070233
  0.90240000   2.13070052
  0.90240000   2.13069880
  0.90240000   2.13069716
  0.90240000   2.13069560
  0.90250000   2.13149553
  0.90250000   2.13148949
  0.90250000   2.13148398
  0.90250000   2.13147894
  0.90250000   2.13147430
  0.90250000   2.13147002
  0.90250000   2.13146605
  0.90250000   2.13146237
  0.90250000   2.13145894
  0.90250000   2.13145573
  0.90250000   2.13145273
  0.90250000   2.13144992
  0.90250000   2.13144727
  0.90250000   2.13144477
  0.90250000   2.13144242
  0.90250000   2.13144019
  0.90250000   2.13143808
  0.90250000   2.13143608
  0.90250000   2.13143419
  0.90250000   2.13143238
  0.90250000   2.13143066
  0.90250000   2.13142902
  0.90250000   2.13142745
  0.90260000   2.13222466
  0.90260000   2.13221863
  0.90260000   2.13221312
  0.90260000   2.13220808
  0.90260000   2.13220343
  0.90260000   2.13219915
  0.90260000   2.13219518
  0.90260000   2.13219150
  0.90260000   2.13218806
  0.90260000   2.13218486
  0.90260000   2.13218186
  0.90260000   2.13217904
  0.90260000   2.13217639
  0.90260000   2.13217389
  0.90260000   2.13217154
  0.90260000   2.13216931
  0.90260000   2.13216720
  0.90260000   2.13216520
  0.90260000   2.13216330
  0.90260000   2.13216149
  0.90260000   2.13215977
  0.90260000   2.13215813
  0.90260000   2.13215656
  0.90270000   2.13295107
  0.90270000   2.13294504
  0.90270000   2.13293953
  0.90270000   2.13293448
  0.90270000   2.13292984
  0.90270000   2.13292556
  0.90270000   2.13292159
  0.90270000   2.13291790
  0.90270000   2.13291446
  0.90270000   2.13291126
  0.90270000   2.13290825
  0.90270000   2.13290543
  0.90270000   2.13290278
  0.90270000   2.13290029
  0.90270000   2.13289793
  0.90270000   2.13289570
  0.90270000   2.13289359
  0.90270000   2.13289159
  0.90270000   2.13288968
  0.90270000   2.13288787
  0.90270000   2.13288615
  0.90270000   2.13288451
  0.90270000   2.13288294
  0.90280000   2.13367477
  0.90280000   2.13366874
  0.90280000   2.13366323
  0.90280000   2.13365818
  0.90280000   2.13365354
  0.90280000   2.13364925
  0.90280000   2.13364528
  0.90280000   2.13364159
  0.90280000   2.13363815
  0.90280000   2.13363494
  0.90280000   2.13363194
  0.90280000   2.13362912
  0.90280000   2.13362647
  0.90280000   2.13362397
  0.90280000   2.13362161
  0.90280000   2.13361938
  0.90280000   2.13361727
  0.90280000   2.13361526
  0.90280000   2.13361336
  0.90280000   2.13361155
  0.90280000   2.13360982
  0.90280000   2.13360818
  0.90280000   2.13360661
  0.90290000   2.13439578
  0.90290000   2.13438974
  0.90290000   2.13438423
  0.90290000   2.13437918
  0.90290000   2.13437454
  0.90290000   2.13437025
  0.90290000   2.13436628
  0.90290000   2.13436259
  0.90290000   2.13435915
  0.90290000   2.13435594
  0.90290000   2.13435293
  0.90290000   2.13435011
  0.90290000   2.13434746
  0.90290000   2.13434495
  0.90290000   2.13434259
  0.90290000   2.13434036
  0.90290000   2.13433825
  0.90290000   2.13433624
  0.90290000   2.13433434
  0.90290000   2.13433253
  0.90290000   2.13433080
  0.90290000   2.13432916
  0.90290000   2.13432759
  0.90300000   2.13511411
  0.90300000   2.13510807
  0.90300000   2.13510256
  0.90300000   2.13509751
  0.90300000   2.13509286
  0.90300000   2.13508857
  0.90300000   2.13508460
  0.90300000   2.13508091
  0.90300000   2.13507747
  0.90300000   2.13507426
  0.90300000   2.13507125
  0.90300000   2.13506842
  0.90300000   2.13506577
  0.90300000   2.13506327
  0.90300000   2.13506090
  0.90300000   2.13505867
  0.90300000   2.13505656
  0.90300000   2.13505455
  0.90300000   2.13505264
  0.90300000   2.13505083
  0.90300000   2.13504911
  0.90300000   2.13504746
  0.90300000   2.13504589
  0.90310000   2.13582978
  0.90310000   2.13582374
  0.90310000   2.13581823
  0.90310000   2.13581317
  0.90310000   2.13580853
  0.90310000   2.13580424
  0.90310000   2.13580026
  0.90310000   2.13579657
  0.90310000   2.13579313
  0.90310000   2.13578991
  0.90310000   2.13578690
  0.90310000   2.13578408
  0.90310000   2.13578142
  0.90310000   2.13577892
  0.90310000   2.13577655
  0.90310000   2.13577432
  0.90310000   2.13577220
  0.90310000   2.13577020
  0.90310000   2.13576829
  0.90310000   2.13576648
  0.90310000   2.13576475
  0.90310000   2.13576310
  0.90310000   2.13576153
  0.90320000   2.13654280
  0.90320000   2.13653676
  0.90320000   2.13653125
  0.90320000   2.13652620
  0.90320000   2.13652155
  0.90320000   2.13651726
  0.90320000   2.13651328
  0.90320000   2.13650959
  0.90320000   2.13650614
  0.90320000   2.13650293
  0.90320000   2.13649991
  0.90320000   2.13649709
  0.90320000   2.13649443
  0.90320000   2.13649193
  0.90320000   2.13648956
  0.90320000   2.13648733
  0.90320000   2.13648521
  0.90320000   2.13648320
  0.90320000   2.13648129
  0.90320000   2.13647948
  0.90320000   2.13647775
  0.90320000   2.13647610
  0.90320000   2.13647452
  0.90330000   2.13725320
  0.90330000   2.13724716
  0.90330000   2.13724165
  0.90330000   2.13723659
  0.90330000   2.13723194
  0.90330000   2.13722765
  0.90330000   2.13722367
  0.90330000   2.13721998
  0.90330000   2.13721653
  0.90330000   2.13721331
  0.90330000   2.13721030
  0.90330000   2.13720747
  0.90330000   2.13720481
  0.90330000   2.13720231
  0.90330000   2.13719994
  0.90330000   2.13719770
  0.90330000   2.13719558
  0.90330000   2.13719357
  0.90330000   2.13719166
  0.90330000   2.13718985
  0.90330000   2.13718812
  0.90330000   2.13718647
  0.90330000   2.13718489
  0.90340000   2.13796099
  0.90340000   2.13795495
  0.90340000   2.13794943
  0.90340000   2.13794438
  0.90340000   2.13793973
  0.90340000   2.13793543
  0.90340000   2.13793145
  0.90340000   2.13792775
  0.90340000   2.13792431
  0.90340000   2.13792109
  0.90340000   2.13791808
  0.90340000   2.13791525
  0.90340000   2.13791258
  0.90340000   2.13791008
  0.90340000   2.13790771
  0.90340000   2.13790547
  0.90340000   2.13790335
  0.90340000   2.13790134
  0.90340000   2.13789943
  0.90340000   2.13789761
  0.90340000   2.13789588
  0.90340000   2.13789423
  0.90340000   2.13789265
  0.90350000   2.13866618
  0.90350000   2.13866014
  0.90350000   2.13865462
  0.90350000   2.13864957
  0.90350000   2.13864492
  0.90350000   2.13864062
  0.90350000   2.13863664
  0.90350000   2.13863294
  0.90350000   2.13862949
  0.90350000   2.13862627
  0.90350000   2.13862325
  0.90350000   2.13862042
  0.90350000   2.13861776
  0.90350000   2.13861525
  0.90350000   2.13861288
  0.90350000   2.13861064
  0.90350000   2.13860852
  0.90350000   2.13860651
  0.90350000   2.13860460
  0.90350000   2.13860278
  0.90350000   2.13860105
  0.90350000   2.13859939
  0.90350000   2.13859782
  0.90360000   2.13936880
  0.90360000   2.13936275
  0.90360000   2.13935724
  0.90360000   2.13935218
  0.90360000   2.13934753
  0.90360000   2.13934323
  0.90360000   2.13933925
  0.90360000   2.13933555
  0.90360000   2.13933210
  0.90360000   2.13932887
  0.90360000   2.13932586
  0.90360000   2.13932302
  0.90360000   2.13932036
  0.90360000   2.13931785
  0.90360000   2.13931548
  0.90360000   2.13931324
  0.90360000   2.13931112
  0.90360000   2.13930910
  0.90360000   2.13930719
  0.90360000   2.13930537
  0.90360000   2.13930363
  0.90360000   2.13930198
  0.90360000   2.13930040
  0.90370000   2.14006885
  0.90370000   2.14006280
  0.90370000   2.14005729
  0.90370000   2.14005223
  0.90370000   2.14004757
  0.90370000   2.14004327
  0.90370000   2.14003929
  0.90370000   2.14003559
  0.90370000   2.14003214
  0.90370000   2.14002891
  0.90370000   2.14002590
  0.90370000   2.14002306
  0.90370000   2.14002040
  0.90370000   2.14001788
  0.90370000   2.14001551
  0.90370000   2.14001327
  0.90370000   2.14001115
  0.90370000   2.14000913
  0.90370000   2.14000722
  0.90370000   2.14000540
  0.90370000   2.14000366
  0.90370000   2.14000201
  0.90370000   2.14000043
  0.90380000   2.14076635
  0.90380000   2.14076031
  0.90380000   2.14075479
  0.90380000   2.14074973
  0.90380000   2.14074507
  0.90380000   2.14074077
  0.90380000   2.14073679
  0.90380000   2.14073308
  0.90380000   2.14072963
  0.90380000   2.14072641
  0.90380000   2.14072339
  0.90380000   2.14072055
  0.90380000   2.14071789
  0.90380000   2.14071537
  0.90380000   2.14071300
  0.90380000   2.14071076
  0.90380000   2.14070863
  0.90380000   2.14070661
  0.90380000   2.14070470
  0.90380000   2.14070287
  0.90380000   2.14070114
  0.90380000   2.14069948
  0.90380000   2.14069790
  0.90390000   2.14146133
  0.90390000   2.14145528
  0.90390000   2.14144976
  0.90390000   2.14144470
  0.90390000   2.14144004
  0.90390000   2.14143574
  0.90390000   2.14143175
  0.90390000   2.14142805
  0.90390000   2.14142460
  0.90390000   2.14142137
  0.90390000   2.14141835
  0.90390000   2.14141551
  0.90390000   2.14141284
  0.90390000   2.14141033
  0.90390000   2.14140795
  0.90390000   2.14140571
  0.90390000   2.14140358
  0.90390000   2.14140156
  0.90390000   2.14139965
  0.90390000   2.14139782
  0.90390000   2.14139609
  0.90390000   2.14139443
  0.90390000   2.14139285
  0.90400000   2.14215378
  0.90400000   2.14214774
  0.90400000   2.14214222
  0.90400000   2.14213715
  0.90400000   2.14213250
  0.90400000   2.14212819
  0.90400000   2.14212420
  0.90400000   2.14212050
  0.90400000   2.14211704
  0.90400000   2.14211382
  0.90400000   2.14211079
  0.90400000   2.14210795
  0.90400000   2.14210528
  0.90400000   2.14210277
  0.90400000   2.14210039
  0.90400000   2.14209815
  0.90400000   2.14209602
  0.90400000   2.14209400
  0.90400000   2.14209208
  0.90400000   2.14209026
  0.90400000   2.14208852
  0.90400000   2.14208686
  0.90400000   2.14208528
  0.90410000   2.14284374
  0.90410000   2.14283769
  0.90410000   2.14283217
  0.90410000   2.14282711
  0.90410000   2.14282245
  0.90410000   2.14281814
  0.90410000   2.14281415
  0.90410000   2.14281045
  0.90410000   2.14280699
  0.90410000   2.14280376
  0.90410000   2.14280074
  0.90410000   2.14279790
  0.90410000   2.14279523
  0.90410000   2.14279271
  0.90410000   2.14279033
  0.90410000   2.14278808
  0.90410000   2.14278595
  0.90410000   2.14278393
  0.90410000   2.14278201
  0.90410000   2.14278019
  0.90410000   2.14277845
  0.90410000   2.14277679
  0.90410000   2.14277521
  0.90420000   2.14353121
  0.90420000   2.14352516
  0.90420000   2.14351964
  0.90420000   2.14351458
  0.90420000   2.14350991
  0.90420000   2.14350561
  0.90420000   2.14350162
  0.90420000   2.14349791
  0.90420000   2.14349445
  0.90420000   2.14349122
  0.90420000   2.14348819
  0.90420000   2.14348535
  0.90420000   2.14348268
  0.90420000   2.14348016
  0.90420000   2.14347778
  0.90420000   2.14347553
  0.90420000   2.14347340
  0.90420000   2.14347138
  0.90420000   2.14346946
  0.90420000   2.14346763
  0.90420000   2.14346589
  0.90420000   2.14346423
  0.90420000   2.14346265
  0.90430000   2.14421621
  0.90430000   2.14421016
  0.90430000   2.14420464
  0.90430000   2.14419957
  0.90430000   2.14419491
  0.90430000   2.14419060
  0.90430000   2.14418661
  0.90430000   2.14418290
  0.90430000   2.14417944
  0.90430000   2.14417621
  0.90430000   2.14417318
  0.90430000   2.14417034
  0.90430000   2.14416767
  0.90430000   2.14416515
  0.90430000   2.14416277
  0.90430000   2.14416052
  0.90430000   2.14415838
  0.90430000   2.14415636
  0.90430000   2.14415444
  0.90430000   2.14415261
  0.90430000   2.14415087
  0.90430000   2.14414921
  0.90430000   2.14414762
  0.90440000   2.14489876
  0.90440000   2.14489271
  0.90440000   2.14488718
  0.90440000   2.14488212
  0.90440000   2.14487745
  0.90440000   2.14487314
  0.90440000   2.14486915
  0.90440000   2.14486544
  0.90440000   2.14486198
  0.90440000   2.14485874
  0.90440000   2.14485571
  0.90440000   2.14485287
  0.90440000   2.14485020
  0.90440000   2.14484767
  0.90440000   2.14484529
  0.90440000   2.14484304
  0.90440000   2.14484091
  0.90440000   2.14483888
  0.90440000   2.14483696
  0.90440000   2.14483513
  0.90440000   2.14483339
  0.90440000   2.14483173
  0.90440000   2.14483014
  0.90450000   2.14557886
  0.90450000   2.14557281
  0.90450000   2.14556728
  0.90450000   2.14556222
  0.90450000   2.14555755
  0.90450000   2.14555324
  0.90450000   2.14554925
  0.90450000   2.14554553
  0.90450000   2.14554207
  0.90450000   2.14553884
  0.90450000   2.14553581
  0.90450000   2.14553296
  0.90450000   2.14553028
  0.90450000   2.14552776
  0.90450000   2.14552538
  0.90450000   2.14552313
  0.90450000   2.14552099
  0.90450000   2.14551897
  0.90450000   2.14551704
  0.90450000   2.14551521
  0.90450000   2.14551347
  0.90450000   2.14551180
  0.90450000   2.14551022
  0.90460000   2.14625654
  0.90460000   2.14625049
  0.90460000   2.14624496
  0.90460000   2.14623989
  0.90460000   2.14623523
  0.90460000   2.14623092
  0.90460000   2.14622692
  0.90460000   2.14622320
  0.90460000   2.14621974
  0.90460000   2.14621650
  0.90460000   2.14621347
  0.90460000   2.14621063
  0.90460000   2.14620795
  0.90460000   2.14620542
  0.90460000   2.14620304
  0.90460000   2.14620079
  0.90460000   2.14619865
  0.90460000   2.14619662
  0.90460000   2.14619470
  0.90460000   2.14619287
  0.90460000   2.14619112
  0.90460000   2.14618946
  0.90460000   2.14618787
  0.90470000   2.14693181
  0.90470000   2.14692575
  0.90470000   2.14692023
  0.90470000   2.14691516
  0.90470000   2.14691049
  0.90470000   2.14690618
  0.90470000   2.14690218
  0.90470000   2.14689846
  0.90470000   2.14689500
  0.90470000   2.14689176
  0.90470000   2.14688873
  0.90470000   2.14688588
  0.90470000   2.14688320
  0.90470000   2.14688067
  0.90470000   2.14687829
  0.90470000   2.14687603
  0.90470000   2.14687390
  0.90470000   2.14687187
  0.90470000   2.14686994
  0.90470000   2.14686811
  0.90470000   2.14686636
  0.90470000   2.14686470
  0.90470000   2.14686311
  0.90480000   2.14760468
  0.90480000   2.14759862
  0.90480000   2.14759309
  0.90480000   2.14758802
  0.90480000   2.14758336
  0.90480000   2.14757904
  0.90480000   2.14757504
  0.90480000   2.14757132
  0.90480000   2.14756786
  0.90480000   2.14756462
  0.90480000   2.14756158
  0.90480000   2.14755873
  0.90480000   2.14755605
  0.90480000   2.14755353
  0.90480000   2.14755114
  0.90480000   2.14754888
  0.90480000   2.14754675
  0.90480000   2.14754472
  0.90480000   2.14754279
  0.90480000   2.14754096
  0.90480000   2.14753921
  0.90480000   2.14753754
  0.90480000   2.14753595
  0.90490000   2.14827516
  0.90490000   2.14826911
  0.90490000   2.14826358
  0.90490000   2.14825851
  0.90490000   2.14825384
  0.90490000   2.14824952
  0.90490000   2.14824552
  0.90490000   2.14824180
  0.90490000   2.14823834
  0.90490000   2.14823509
  0.90490000   2.14823206
  0.90490000   2.14822921
  0.90490000   2.14822653
  0.90490000   2.14822400
  0.90490000   2.14822161
  0.90490000   2.14821935
  0.90490000   2.14821721
  0.90490000   2.14821518
  0.90490000   2.14821325
  0.90490000   2.14821142
  0.90490000   2.14820967
  0.90490000   2.14820800
  0.90490000   2.14820641
  0.90500000   2.14894328
  0.90500000   2.14893723
  0.90500000   2.14893170
  0.90500000   2.14892662
  0.90500000   2.14892195
  0.90500000   2.14891764
  0.90500000   2.14891363
  0.90500000   2.14890991
  0.90500000   2.14890644
  0.90500000   2.14890320
  0.90500000   2.14890016
  0.90500000   2.14889731
  0.90500000   2.14889463
  0.90500000   2.14889210
  0.90500000   2.14888971
  0.90500000   2.14888745
  0.90500000   2.14888531
  0.90500000   2.14888328
  0.90500000   2.14888135
  0.90500000   2.14887951
  0.90500000   2.14887777
  0.90500000   2.14887610
  0.90500000   2.14887450
  0.90510000   2.14960905
  0.90510000   2.14960299
  0.90510000   2.14959746
  0.90510000   2.14959238
  0.90510000   2.14958771
  0.90510000   2.14958339
  0.90510000   2.14957939
  0.90510000   2.14957567
  0.90510000   2.14957220
  0.90510000   2.14956895
  0.90510000   2.14956592
  0.90510000   2.14956306
  0.90510000   2.14956038
  0.90510000   2.14955785
  0.90510000   2.14955546
  0.90510000   2.14955320
  0.90510000   2.14955106
  0.90510000   2.14954902
  0.90510000   2.14954709
  0.90510000   2.14954526
  0.90510000   2.14954350
  0.90510000   2.14954184
  0.90510000   2.14954024
  0.90520000   2.15027247
  0.90520000   2.15026641
  0.90520000   2.15026088
  0.90520000   2.15025581
  0.90520000   2.15025113
  0.90520000   2.15024681
  0.90520000   2.15024281
  0.90520000   2.15023908
  0.90520000   2.15023561
  0.90520000   2.15023237
  0.90520000   2.15022933
  0.90520000   2.15022647
  0.90520000   2.15022379
  0.90520000   2.15022126
  0.90520000   2.15021886
  0.90520000   2.15021660
  0.90520000   2.15021446
  0.90520000   2.15021243
  0.90520000   2.15021049
  0.90520000   2.15020866
  0.90520000   2.15020690
  0.90520000   2.15020523
  0.90520000   2.15020364
  0.90530000   2.15093357
  0.90530000   2.15092751
  0.90530000   2.15092198
  0.90530000   2.15091690
  0.90530000   2.15091222
  0.90530000   2.15090790
  0.90530000   2.15090390
  0.90530000   2.15090017
  0.90530000   2.15089670
  0.90530000   2.15089345
  0.90530000   2.15089041
  0.90530000   2.15088756
  0.90530000   2.15088487
  0.90530000   2.15088234
  0.90530000   2.15087994
  0.90530000   2.15087768
  0.90530000   2.15087554
  0.90530000   2.15087350
  0.90530000   2.15087157
  0.90530000   2.15086973
  0.90530000   2.15086798
  0.90530000   2.15086630
  0.90530000   2.15086471
  0.90540000   2.15159235
  0.90540000   2.15158629
  0.90540000   2.15158076
  0.90540000   2.15157568
  0.90540000   2.15157100
  0.90540000   2.15156668
  0.90540000   2.15156267
  0.90540000   2.15155895
  0.90540000   2.15155547
  0.90540000   2.15155223
  0.90540000   2.15154918
  0.90540000   2.15154633
  0.90540000   2.15154364
  0.90540000   2.15154110
  0.90540000   2.15153871
  0.90540000   2.15153645
  0.90540000   2.15153430
  0.90540000   2.15153227
  0.90540000   2.15153033
  0.90540000   2.15152849
  0.90540000   2.15152674
  0.90540000   2.15152506
  0.90540000   2.15152347
  0.90550000   2.15224883
  0.90550000   2.15224278
  0.90550000   2.15223724
  0.90550000   2.15223216
  0.90550000   2.15222748
  0.90550000   2.15222316
  0.90550000   2.15221915
  0.90550000   2.15221542
  0.90550000   2.15221195
  0.90550000   2.15220870
  0.90550000   2.15220566
  0.90550000   2.15220280
  0.90550000   2.15220011
  0.90550000   2.15219757
  0.90550000   2.15219518
  0.90550000   2.15219291
  0.90550000   2.15219077
  0.90550000   2.15218873
  0.90550000   2.15218679
  0.90550000   2.15218495
  0.90550000   2.15218320
  0.90550000   2.15218152
  0.90550000   2.15217992
  0.90560000   2.15290303
  0.90560000   2.15289697
  0.90560000   2.15289144
  0.90560000   2.15288636
  0.90560000   2.15288168
  0.90560000   2.15287735
  0.90560000   2.15287334
  0.90560000   2.15286962
  0.90560000   2.15286614
  0.90560000   2.15286289
  0.90560000   2.15285984
  0.90560000   2.15285698
  0.90560000   2.15285429
  0.90560000   2.15285176
  0.90560000   2.15284936
  0.90560000   2.15284709
  0.90560000   2.15284495
  0.90560000   2.15284291
  0.90560000   2.15284097
  0.90560000   2.15283913
  0.90560000   2.15283737
  0.90560000   2.15283570
  0.90560000   2.15283410
  0.90570000   2.15355496
  0.90570000   2.15354890
  0.90570000   2.15354336
  0.90570000   2.15353828
  0.90570000   2.15353360
  0.90570000   2.15352927
  0.90570000   2.15352526
  0.90570000   2.15352153
  0.90570000   2.15351806
  0.90570000   2.15351480
  0.90570000   2.15351176
  0.90570000   2.15350890
  0.90570000   2.15350620
  0.90570000   2.15350367
  0.90570000   2.15350127
  0.90570000   2.15349900
  0.90570000   2.15349685
  0.90570000   2.15349481
  0.90570000   2.15349287
  0.90570000   2.15349103
  0.90570000   2.15348927
  0.90570000   2.15348760
  0.90570000   2.15348600
  0.90580000   2.15420462
  0.90580000   2.15419856
  0.90580000   2.15419303
  0.90580000   2.15418794
  0.90580000   2.15418326
  0.90580000   2.15417894
  0.90580000   2.15417492
  0.90580000   2.15417119
  0.90580000   2.15416771
  0.90580000   2.15416446
  0.90580000   2.15416141
  0.90580000   2.15415855
  0.90580000   2.15415586
  0.90580000   2.15415332
  0.90580000   2.15415092
  0.90580000   2.15414865
  0.90580000   2.15414650
  0.90580000   2.15414446
  0.90580000   2.15414252
  0.90580000   2.15414068
  0.90580000   2.15413892
  0.90580000   2.15413724
  0.90580000   2.15413564
  0.90590000   2.15485204
  0.90590000   2.15484598
  0.90590000   2.15484045
  0.90590000   2.15483536
  0.90590000   2.15483068
  0.90590000   2.15482635
  0.90590000   2.15482234
  0.90590000   2.15481861
  0.90590000   2.15481512
  0.90590000   2.15481187
  0.90590000   2.15480882
  0.90590000   2.15480596
  0.90590000   2.15480326
  0.90590000   2.15480072
  0.90590000   2.15479832
  0.90590000   2.15479605
  0.90590000   2.15479390
  0.90590000   2.15479186
  0.90590000   2.15478992
  0.90590000   2.15478807
  0.90590000   2.15478632
  0.90590000   2.15478464
  0.90590000   2.15478304
  0.90600000   2.15549723
  0.90600000   2.15549117
  0.90600000   2.15548563
  0.90600000   2.15548055
  0.90600000   2.15547586
  0.90600000   2.15547153
  0.90600000   2.15546752
  0.90600000   2.15546379
  0.90600000   2.15546030
  0.90600000   2.15545705
  0.90600000   2.15545400
  0.90600000   2.15545113
  0.90600000   2.15544844
  0.90600000   2.15544589
  0.90600000   2.15544349
  0.90600000   2.15544122
  0.90600000   2.15543907
  0.90600000   2.15543703
  0.90600000   2.15543509
  0.90600000   2.15543324
  0.90600000   2.15543148
  0.90600000   2.15542980
  0.90600000   2.15542820
  0.90610000   2.15614020
  0.90610000   2.15613414
  0.90610000   2.15612860
  0.90610000   2.15612351
  0.90610000   2.15611883
  0.90610000   2.15611450
  0.90610000   2.15611048
  0.90610000   2.15610675
  0.90610000   2.15610326
  0.90610000   2.15610001
  0.90610000   2.15609695
  0.90610000   2.15609409
  0.90610000   2.15609139
  0.90610000   2.15608885
  0.90610000   2.15608645
  0.90610000   2.15608417
  0.90610000   2.15608202
  0.90610000   2.15607998
  0.90610000   2.15607803
  0.90610000   2.15607619
  0.90610000   2.15607443
  0.90610000   2.15607275
  0.90610000   2.15607114
  0.90620000   2.15678096
  0.90620000   2.15677490
  0.90620000   2.15676936
  0.90620000   2.15676427
  0.90620000   2.15675958
  0.90620000   2.15675525
  0.90620000   2.15675124
  0.90620000   2.15674750
  0.90620000   2.15674401
  0.90620000   2.15674076
  0.90620000   2.15673770
  0.90620000   2.15673484
  0.90620000   2.15673214
  0.90620000   2.15672959
  0.90620000   2.15672719
  0.90620000   2.15672492
  0.90620000   2.15672276
  0.90620000   2.15672072
  0.90620000   2.15671877
  0.90620000   2.15671692
  0.90620000   2.15671516
  0.90620000   2.15671348
  0.90620000   2.15671188
  0.90630000   2.15741953
  0.90630000   2.15741346
  0.90630000   2.15740792
  0.90630000   2.15740283
  0.90630000   2.15739815
  0.90630000   2.15739381
  0.90630000   2.15738980
  0.90630000   2.15738606
  0.90630000   2.15738257
  0.90630000   2.15737931
  0.90630000   2.15737626
  0.90630000   2.15737339
  0.90630000   2.15737069
  0.90630000   2.15736814
  0.90630000   2.15736574
  0.90630000   2.15736346
  0.90630000   2.15736131
  0.90630000   2.15735926
  0.90630000   2.15735732
  0.90630000   2.15735547
  0.90630000   2.15735371
  0.90630000   2.15735202
  0.90630000   2.15735042
  0.90640000   2.15805591
  0.90640000   2.15804985
  0.90640000   2.15804430
  0.90640000   2.15803922
  0.90640000   2.15803453
  0.90640000   2.15803019
  0.90640000   2.15802617
  0.90640000   2.15802243
  0.90640000   2.15801895
  0.90640000   2.15801569
  0.90640000   2.15801263
  0.90640000   2.15800976
  0.90640000   2.15800706
  0.90640000   2.15800451
  0.90640000   2.15800211
  0.90640000   2.15799983
  0.90640000   2.15799768
  0.90640000   2.15799563
  0.90640000   2.15799368
  0.90640000   2.15799183
  0.90640000   2.15799007
  0.90640000   2.15798839
  0.90640000   2.15798678
  0.90650000   2.15869013
  0.90650000   2.15868406
  0.90650000   2.15867852
  0.90650000   2.15867343
  0.90650000   2.15866874
  0.90650000   2.15866440
  0.90650000   2.15866038
  0.90650000   2.15865664
  0.90650000   2.15865315
  0.90650000   2.15864989
  0.90650000   2.15864683
  0.90650000   2.15864396
  0.90650000   2.15864126
  0.90650000   2.15863871
  0.90650000   2.15863631
  0.90650000   2.15863403
  0.90650000   2.15863187
  0.90650000   2.15862982
  0.90650000   2.15862788
  0.90650000   2.15862603
  0.90650000   2.15862426
  0.90650000   2.15862258
  0.90650000   2.15862097
  0.90660000   2.15932218
  0.90660000   2.15931612
  0.90660000   2.15931057
  0.90660000   2.15930548
  0.90660000   2.15930079
  0.90660000   2.15929646
  0.90660000   2.15929243
  0.90660000   2.15928869
  0.90660000   2.15928520
  0.90660000   2.15928194
  0.90660000   2.15927888
  0.90660000   2.15927601
  0.90660000   2.15927331
  0.90660000   2.15927076
  0.90660000   2.15926835
  0.90660000   2.15926607
  0.90660000   2.15926391
  0.90660000   2.15926186
  0.90660000   2.15925992
  0.90660000   2.15925806
  0.90660000   2.15925630
  0.90660000   2.15925461
  0.90660000   2.15925300
  0.90670000   2.15995210
  0.90670000   2.15994603
  0.90670000   2.15994048
  0.90670000   2.15993539
  0.90670000   2.15993070
  0.90670000   2.15992636
  0.90670000   2.15992234
  0.90670000   2.15991860
  0.90670000   2.15991511
  0.90670000   2.15991184
  0.90670000   2.15990878
  0.90670000   2.15990591
  0.90670000   2.15990321
  0.90670000   2.15990066
  0.90670000   2.15989825
  0.90670000   2.15989597
  0.90670000   2.15989381
  0.90670000   2.15989176
  0.90670000   2.15988981
  0.90670000   2.15988796
  0.90670000   2.15988619
  0.90670000   2.15988450
  0.90670000   2.15988289
  0.90680000   2.16057988
  0.90680000   2.16057381
  0.90680000   2.16056826
  0.90680000   2.16056317
  0.90680000   2.16055848
  0.90680000   2.16055414
  0.90680000   2.16055012
  0.90680000   2.16054637
  0.90680000   2.16054288
  0.90680000   2.16053961
  0.90680000   2.16053655
  0.90680000   2.16053368
  0.90680000   2.16053097
  0.90680000   2.16052842
  0.90680000   2.16052601
  0.90680000   2.16052373
  0.90680000   2.16052157
  0.90680000   2.16051952
  0.90680000   2.16051757
  0.90680000   2.16051572
  0.90680000   2.16051395
  0.90680000   2.16051226
  0.90680000   2.16051065
  0.90690000   2.16120554
  0.90690000   2.16119947
  0.90690000   2.16119392
  0.90690000   2.16118883
  0.90690000   2.16118414
  0.90690000   2.16117980
  0.90690000   2.16117577
  0.90690000   2.16117203
  0.90690000   2.16116853
  0.90690000   2.16116527
  0.90690000   2.16116220
  0.90690000   2.16115933
  0.90690000   2.16115662
  0.90690000   2.16115407
  0.90690000   2.16115166
  0.90690000   2.16114938
  0.90690000   2.16114721
  0.90690000   2.16114516
  0.90690000   2.16114321
  0.90690000   2.16114136
  0.90690000   2.16113959
  0.90690000   2.16113790
  0.90690000   2.16113629
  0.90700000   2.16182909
  0.90700000   2.16182302
  0.90700000   2.16181748
  0.90700000   2.16181238
  0.90700000   2.16180769
  0.90700000   2.16180335
  0.90700000   2.16179932
  0.90700000   2.16179557
  0.90700000   2.16179208
  0.90700000   2.16178881
  0.90700000   2.16178575
  0.90700000   2.16178287
  0.90700000   2.16178016
  0.90700000   2.16177761
  0.90700000   2.16177520
  0.90700000   2.16177291
  0.90700000   2.16177075
  0.90700000   2.16176870
  0.90700000   2.16176675
  0.90700000   2.16176489
  0.90700000   2.16176312
  0.90700000   2.16176143
  0.90700000   2.16175982
  0.90710000   2.16245055
  0.90710000   2.16244448
  0.90710000   2.16243893
  0.90710000   2.16243384
  0.90710000   2.16242914
  0.90710000   2.16242480
  0.90710000   2.16242077
  0.90710000   2.16241702
  0.90710000   2.16241353
  0.90710000   2.16241026
  0.90710000   2.16240719
  0.90710000   2.16240431
  0.90710000   2.16240161
  0.90710000   2.16239905
  0.90710000   2.16239664
  0.90710000   2.16239435
  0.90710000   2.16239219
  0.90710000   2.16239014
  0.90710000   2.16238818
  0.90710000   2.16238633
  0.90710000   2.16238456
  0.90710000   2.16238287
  0.90710000   2.16238125
  0.90720000   2.16306992
  0.90720000   2.16306385
  0.90720000   2.16305830
  0.90720000   2.16305321
  0.90720000   2.16304851
  0.90720000   2.16304417
  0.90720000   2.16304014
  0.90720000   2.16303639
  0.90720000   2.16303289
  0.90720000   2.16302962
  0.90720000   2.16302655
  0.90720000   2.16302368
  0.90720000   2.16302097
  0.90720000   2.16301841
  0.90720000   2.16301600
  0.90720000   2.16301371
  0.90720000   2.16301155
  0.90720000   2.16300949
  0.90720000   2.16300754
  0.90720000   2.16300568
  0.90720000   2.16300391
  0.90720000   2.16300222
  0.90720000   2.16300060
  0.90730000   2.16368722
  0.90730000   2.16368115
  0.90730000   2.16367560
  0.90730000   2.16367050
  0.90730000   2.16366581
  0.90730000   2.16366146
  0.90730000   2.16365743
  0.90730000   2.16365368
  0.90730000   2.16365018
  0.90730000   2.16364691
  0.90730000   2.16364384
  0.90730000   2.16364096
  0.90730000   2.16363825
  0.90730000   2.16363570
  0.90730000   2.16363328
  0.90730000   2.16363099
  0.90730000   2.16362883
  0.90730000   2.16362677
  0.90730000   2.16362482
  0.90730000   2.16362296
  0.90730000   2.16362119
  0.90730000   2.16361949
  0.90730000   2.16361788
  0.90740000   2.16430246
  0.90740000   2.16429639
  0.90740000   2.16429084
  0.90740000   2.16428574
  0.90740000   2.16428104
  0.90740000   2.16427670
  0.90740000   2.16427266
  0.90740000   2.16426891
  0.90740000   2.16426541
  0.90740000   2.16426214
  0.90740000   2.16425907
  0.90740000   2.16425619
  0.90740000   2.16425348
  0.90740000   2.16425092
  0.90740000   2.16424850
  0.90740000   2.16424622
  0.90740000   2.16424405
  0.90740000   2.16424199
  0.90740000   2.16424004
  0.90740000   2.16423818
  0.90740000   2.16423640
  0.90740000   2.16423471
  0.90740000   2.16423310
  0.90750000   2.16491565
  0.90750000   2.16490958
  0.90750000   2.16490403
  0.90750000   2.16489893
  0.90750000   2.16489423
  0.90750000   2.16488988
  0.90750000   2.16488585
  0.90750000   2.16488210
  0.90750000   2.16487860
  0.90750000   2.16487532
  0.90750000   2.16487225
  0.90750000   2.16486937
  0.90750000   2.16486666
  0.90750000   2.16486410
  0.90750000   2.16486168
  0.90750000   2.16485939
  0.90750000   2.16485722
  0.90750000   2.16485517
  0.90750000   2.16485321
  0.90750000   2.16485135
  0.90750000   2.16484957
  0.90750000   2.16484788
  0.90750000   2.16484626
  0.90760000   2.16552680
  0.90760000   2.16552073
  0.90760000   2.16551518
  0.90760000   2.16551008
  0.90760000   2.16550538
  0.90760000   2.16550103
  0.90760000   2.16549700
  0.90760000   2.16549324
  0.90760000   2.16548974
  0.90760000   2.16548647
  0.90760000   2.16548340
  0.90760000   2.16548051
  0.90760000   2.16547780
  0.90760000   2.16547524
  0.90760000   2.16547282
  0.90760000   2.16547053
  0.90760000   2.16546836
  0.90760000   2.16546630
  0.90760000   2.16546434
  0.90760000   2.16546248
  0.90760000   2.16546071
  0.90760000   2.16545901
  0.90760000   2.16545739
  0.90770000   2.16613593
  0.90770000   2.16612986
  0.90770000   2.16612430
  0.90770000   2.16611920
  0.90770000   2.16611450
  0.90770000   2.16611015
  0.90770000   2.16610612
  0.90770000   2.16610236
  0.90770000   2.16609886
  0.90770000   2.16609558
  0.90770000   2.16609251
  0.90770000   2.16608963
  0.90770000   2.16608691
  0.90770000   2.16608435
  0.90770000   2.16608193
  0.90770000   2.16607964
  0.90770000   2.16607747
  0.90770000   2.16607541
  0.90770000   2.16607345
  0.90770000   2.16607159
  0.90770000   2.16606981
  0.90770000   2.16606812
  0.90770000   2.16606650
  0.90780000   2.16674304
  0.90780000   2.16673697
  0.90780000   2.16673141
  0.90780000   2.16672631
  0.90780000   2.16672161
  0.90780000   2.16671726
  0.90780000   2.16671322
  0.90780000   2.16670947
  0.90780000   2.16670596
  0.90780000   2.16670268
  0.90780000   2.16669961
  0.90780000   2.16669673
  0.90780000   2.16669401
  0.90780000   2.16669145
  0.90780000   2.16668903
  0.90780000   2.16668673
  0.90780000   2.16668456
  0.90780000   2.16668250
  0.90780000   2.16668054
  0.90780000   2.16667868
  0.90780000   2.16667690
  0.90780000   2.16667521
  0.90780000   2.16667359
  0.90790000   2.16734815
  0.90790000   2.16734207
  0.90790000   2.16733652
  0.90790000   2.16733141
  0.90790000   2.16732671
  0.90790000   2.16732236
  0.90790000   2.16731832
  0.90790000   2.16731457
  0.90790000   2.16731106
  0.90790000   2.16730778
  0.90790000   2.16730471
  0.90790000   2.16730182
  0.90790000   2.16729910
  0.90790000   2.16729654
  0.90790000   2.16729412
  0.90790000   2.16729183
  0.90790000   2.16728965
  0.90790000   2.16728759
  0.90790000   2.16728563
  0.90790000   2.16728377
  0.90790000   2.16728199
  0.90790000   2.16728029
  0.90790000   2.16727867
  0.90800000   2.16795126
  0.90800000   2.16794519
  0.90800000   2.16793963
  0.90800000   2.16793453
  0.90800000   2.16792982
  0.90800000   2.16792547
  0.90800000   2.16792143
  0.90800000   2.16791767
  0.90800000   2.16791417
  0.90800000   2.16791089
  0.90800000   2.16790781
  0.90800000   2.16790492
  0.90800000   2.16790221
  0.90800000   2.16789964
  0.90800000   2.16789722
  0.90800000   2.16789492
  0.90800000   2.16789275
  0.90800000   2.16789069
  0.90800000   2.16788873
  0.90800000   2.16788686
  0.90800000   2.16788508
  0.90800000   2.16788339
  0.90800000   2.16788176
  0.90810000   2.16855239
  0.90810000   2.16854632
  0.90810000   2.16854076
  0.90810000   2.16853566
  0.90810000   2.16853095
  0.90810000   2.16852660
  0.90810000   2.16852256
  0.90810000   2.16851880
  0.90810000   2.16851529
  0.90810000   2.16851201
  0.90810000   2.16850894
  0.90810000   2.16850605
  0.90810000   2.16850333
  0.90810000   2.16850076
  0.90810000   2.16849834
  0.90810000   2.16849604
  0.90810000   2.16849387
  0.90810000   2.16849180
  0.90810000   2.16848984
  0.90810000   2.16848797
  0.90810000   2.16848620
  0.90810000   2.16848450
  0.90810000   2.16848288
  0.90820000   2.16915155
  0.90820000   2.16914548
  0.90820000   2.16913992
  0.90820000   2.16913482
  0.90820000   2.16913011
  0.90820000   2.16912575
  0.90820000   2.16912171
  0.90820000   2.16911795
  0.90820000   2.16911445
  0.90820000   2.16911116
  0.90820000   2.16910809
  0.90820000   2.16910520
  0.90820000   2.16910248
  0.90820000   2.16909991
  0.90820000   2.16909748
  0.90820000   2.16909519
  0.90820000   2.16909301
  0.90820000   2.16909095
  0.90820000   2.16908899
  0.90820000   2.16908712
  0.90820000   2.16908534
  0.90820000   2.16908364
  0.90820000   2.16908202
  0.90830000   2.16974876
  0.90830000   2.16974268
  0.90830000   2.16973712
  0.90830000   2.16973202
  0.90830000   2.16972731
  0.90830000   2.16972295
  0.90830000   2.16971891
  0.90830000   2.16971515
  0.90830000   2.16971164
  0.90830000   2.16970836
  0.90830000   2.16970528
  0.90830000   2.16970239
  0.90830000   2.16969967
  0.90830000   2.16969710
  0.90830000   2.16969467
  0.90830000   2.16969238
  0.90830000   2.16969020
  0.90830000   2.16968813
  0.90830000   2.16968617
  0.90830000   2.16968430
  0.90830000   2.16968252
  0.90830000   2.16968082
  0.90830000   2.16967920
  0.90840000   2.17034401
  0.90840000   2.17033793
  0.90840000   2.17033237
  0.90840000   2.17032727
  0.90840000   2.17032256
  0.90840000   2.17031820
  0.90840000   2.17031416
  0.90840000   2.17031040
  0.90840000   2.17030689
  0.90840000   2.17030360
  0.90840000   2.17030052
  0.90840000   2.17029763
  0.90840000   2.17029491
  0.90840000   2.17029234
  0.90840000   2.17028991
  0.90840000   2.17028761
  0.90840000   2.17028544
  0.90840000   2.17028337
  0.90840000   2.17028141
  0.90840000   2.17027954
  0.90840000   2.17027775
  0.90840000   2.17027605
  0.90840000   2.17027443
  0.90850000   2.17093732
  0.90850000   2.17093125
  0.90850000   2.17092569
  0.90850000   2.17092058
  0.90850000   2.17091587
  0.90850000   2.17091151
  0.90850000   2.17090747
  0.90850000   2.17090370
  0.90850000   2.17090019
  0.90850000   2.17089691
  0.90850000   2.17089383
  0.90850000   2.17089093
  0.90850000   2.17088821
  0.90850000   2.17088564
  0.90850000   2.17088321
  0.90850000   2.17088091
  0.90850000   2.17087874
  0.90850000   2.17087667
  0.90850000   2.17087470
  0.90850000   2.17087283
  0.90850000   2.17087105
  0.90850000   2.17086935
  0.90850000   2.17086772
  0.90860000   2.17152871
  0.90860000   2.17152263
  0.90860000   2.17151707
  0.90860000   2.17151196
  0.90860000   2.17150725
  0.90860000   2.17150289
  0.90860000   2.17149885
  0.90860000   2.17149508
  0.90860000   2.17149157
  0.90860000   2.17148829
  0.90860000   2.17148520
  0.90860000   2.17148231
  0.90860000   2.17147958
  0.90860000   2.17147701
  0.90860000   2.17147459
  0.90860000   2.17147229
  0.90860000   2.17147011
  0.90860000   2.17146804
  0.90860000   2.17146607
  0.90860000   2.17146420
  0.90860000   2.17146242
  0.90860000   2.17146072
  0.90860000   2.17145909
  0.90870000   2.17211818
  0.90870000   2.17211210
  0.90870000   2.17210654
  0.90870000   2.17210143
  0.90870000   2.17209672
  0.90870000   2.17209236
  0.90870000   2.17208831
  0.90870000   2.17208455
  0.90870000   2.17208103
  0.90870000   2.17207775
  0.90870000   2.17207466
  0.90870000   2.17207177
  0.90870000   2.17206904
  0.90870000   2.17206647
  0.90870000   2.17206404
  0.90870000   2.17206174
  0.90870000   2.17205956
  0.90870000   2.17205749
  0.90870000   2.17205552
  0.90870000   2.17205365
  0.90870000   2.17205187
  0.90870000   2.17205016
  0.90870000   2.17204854
  0.90880000   2.17270574
  0.90880000   2.17269966
  0.90880000   2.17269410
  0.90880000   2.17268899
  0.90880000   2.17268428
  0.90880000   2.17267992
  0.90880000   2.17267587
  0.90880000   2.17267210
  0.90880000   2.17266859
  0.90880000   2.17266530
  0.90880000   2.17266222
  0.90880000   2.17265932
  0.90880000   2.17265659
  0.90880000   2.17265402
  0.90880000   2.17265159
  0.90880000   2.17264929
  0.90880000   2.17264711
  0.90880000   2.17264504
  0.90880000   2.17264307
  0.90880000   2.17264120
  0.90880000   2.17263941
  0.90880000   2.17263771
  0.90880000   2.17263608
  0.90890000   2.17329141
  0.90890000   2.17328533
  0.90890000   2.17327977
  0.90890000   2.17327465
  0.90890000   2.17326994
  0.90890000   2.17326558
  0.90890000   2.17326153
  0.90890000   2.17325776
  0.90890000   2.17325425
  0.90890000   2.17325096
  0.90890000   2.17324787
  0.90890000   2.17324498
  0.90890000   2.17324225
  0.90890000   2.17323968
  0.90890000   2.17323724
  0.90890000   2.17323494
  0.90890000   2.17323276
  0.90890000   2.17323069
  0.90890000   2.17322872
  0.90890000   2.17322685
  0.90890000   2.17322506
  0.90890000   2.17322336
  0.90890000   2.17322173
  0.90900000   2.17387519
  0.90900000   2.17386911
  0.90900000   2.17386354
  0.90900000   2.17385843
  0.90900000   2.17385372
  0.90900000   2.17384936
  0.90900000   2.17384531
  0.90900000   2.17384154
  0.90900000   2.17383802
  0.90900000   2.17383473
  0.90900000   2.17383165
  0.90900000   2.17382875
  0.90900000   2.17382602
  0.90900000   2.17382344
  0.90900000   2.17382101
  0.90900000   2.17381871
  0.90900000   2.17381653
  0.90900000   2.17381445
  0.90900000   2.17381248
  0.90900000   2.17381061
  0.90900000   2.17380882
  0.90900000   2.17380712
  0.90900000   2.17380549
  0.90910000   2.17445709
  0.90910000   2.17445101
  0.90910000   2.17444545
  0.90910000   2.17444034
  0.90910000   2.17443562
  0.90910000   2.17443126
  0.90910000   2.17442721
  0.90910000   2.17442344
  0.90910000   2.17441992
  0.90910000   2.17441663
  0.90910000   2.17441354
  0.90910000   2.17441064
  0.90910000   2.17440791
  0.90910000   2.17440534
  0.90910000   2.17440290
  0.90910000   2.17440060
  0.90910000   2.17439842
  0.90910000   2.17439634
  0.90910000   2.17439437
  0.90910000   2.17439250
  0.90910000   2.17439071
  0.90910000   2.17438900
  0.90910000   2.17438737
  0.90920000   2.17503713
  0.90920000   2.17503105
  0.90920000   2.17502549
  0.90920000   2.17502037
  0.90920000   2.17501566
  0.90920000   2.17501129
  0.90920000   2.17500724
  0.90920000   2.17500347
  0.90920000   2.17499995
  0.90920000   2.17499666
  0.90920000   2.17499357
  0.90920000   2.17499067
  0.90920000   2.17498794
  0.90920000   2.17498536
  0.90920000   2.17498293
  0.90920000   2.17498062
  0.90920000   2.17497844
  0.90920000   2.17497637
  0.90920000   2.17497440
  0.90920000   2.17497252
  0.90920000   2.17497073
  0.90920000   2.17496902
  0.90920000   2.17496739
  0.90930000   2.17561531
  0.90930000   2.17560923
  0.90930000   2.17560367
  0.90930000   2.17559855
  0.90930000   2.17559384
  0.90930000   2.17558947
  0.90930000   2.17558542
  0.90930000   2.17558165
  0.90930000   2.17557813
  0.90930000   2.17557483
  0.90930000   2.17557175
  0.90930000   2.17556884
  0.90930000   2.17556611
  0.90930000   2.17556353
  0.90930000   2.17556110
  0.90930000   2.17555879
  0.90930000   2.17555661
  0.90930000   2.17555453
  0.90930000   2.17555256
  0.90930000   2.17555068
  0.90930000   2.17554889
  0.90930000   2.17554719
  0.90930000   2.17554556
  0.90940000   2.17619165
  0.90940000   2.17618557
  0.90940000   2.17618000
  0.90940000   2.17617489
  0.90940000   2.17617017
  0.90940000   2.17616580
  0.90940000   2.17616175
  0.90940000   2.17615798
  0.90940000   2.17615446
  0.90940000   2.17615116
  0.90940000   2.17614808
  0.90940000   2.17614517
  0.90940000   2.17614244
  0.90940000   2.17613986
  0.90940000   2.17613742
  0.90940000   2.17613512
  0.90940000   2.17613293
  0.90940000   2.17613086
  0.90940000   2.17612888
  0.90940000   2.17612701
  0.90940000   2.17612521
  0.90940000   2.17612351
  0.90940000   2.17612187
  0.90950000   2.17676615
  0.90950000   2.17676007
  0.90950000   2.17675450
  0.90950000   2.17674939
  0.90950000   2.17674467
  0.90950000   2.17674030
  0.90950000   2.17673625
  0.90950000   2.17673248
  0.90950000   2.17672895
  0.90950000   2.17672566
  0.90950000   2.17672257
  0.90950000   2.17671966
  0.90950000   2.17671693
  0.90950000   2.17671435
  0.90950000   2.17671191
  0.90950000   2.17670961
  0.90950000   2.17670742
  0.90950000   2.17670534
  0.90950000   2.17670337
  0.90950000   2.17670149
  0.90950000   2.17669970
  0.90950000   2.17669799
  0.90950000   2.17669636
  0.90960000   2.17733883
  0.90960000   2.17733275
  0.90960000   2.17732718
  0.90960000   2.17732206
  0.90960000   2.17731734
  0.90960000   2.17731298
  0.90960000   2.17730892
  0.90960000   2.17730515
  0.90960000   2.17730162
  0.90960000   2.17729833
  0.90960000   2.17729524
  0.90960000   2.17729233
  0.90960000   2.17728960
  0.90960000   2.17728702
  0.90960000   2.17728458
  0.90960000   2.17728227
  0.90960000   2.17728008
  0.90960000   2.17727800
  0.90960000   2.17727603
  0.90960000   2.17727415
  0.90960000   2.17727236
  0.90960000   2.17727065
  0.90960000   2.17726901
  0.90970000   2.17790969
  0.90970000   2.17790361
  0.90970000   2.17789804
  0.90970000   2.17789292
  0.90970000   2.17788820
  0.90970000   2.17788383
  0.90970000   2.17787978
  0.90970000   2.17787600
  0.90970000   2.17787248
  0.90970000   2.17786918
  0.90970000   2.17786609
  0.90970000   2.17786318
  0.90970000   2.17786045
  0.90970000   2.17785786
  0.90970000   2.17785543
  0.90970000   2.17785312
  0.90970000   2.17785093
  0.90970000   2.17784885
  0.90970000   2.17784687
  0.90970000   2.17784499
  0.90970000   2.17784320
  0.90970000   2.17784149
  0.90970000   2.17783986
  0.90980000   2.17847874
  0.90980000   2.17847266
  0.90980000   2.17846709
  0.90980000   2.17846197
  0.90980000   2.17845725
  0.90980000   2.17845288
  0.90980000   2.17844882
  0.90980000   2.17844505
  0.90980000   2.17844152
  0.90980000   2.17843823
  0.90980000   2.17843513
  0.90980000   2.17843223
  0.90980000   2.17842949
  0.90980000   2.17842691
  0.90980000   2.17842447
  0.90980000   2.17842216
  0.90980000   2.17841997
  0.90980000   2.17841789
  0.90980000   2.17841591
  0.90980000   2.17841403
  0.90980000   2.17841224
  0.90980000   2.17841053
  0.90980000   2.17840889
  0.90990000   2.17904600
  0.90990000   2.17903992
  0.90990000   2.17903435
  0.90990000   2.17902923
  0.90990000   2.17902450
  0.90990000   2.17902013
  0.90990000   2.17901608
  0.90990000   2.17901230
  0.90990000   2.17900877
  0.90990000   2.17900548
  0.90990000   2.17900238
  0.90990000   2.17899947
  0.90990000   2.17899674
  0.90990000   2.17899415
  0.90990000   2.17899171
  0.90990000   2.17898940
  0.90990000   2.17898721
  0.90990000   2.17898513
  0.90990000   2.17898315
  0.90990000   2.17898127
  0.90990000   2.17897948
  0.90990000   2.17897777
  0.90990000   2.17897613
  0.91000000   2.17961147
  0.91000000   2.17960538
  0.91000000   2.17959981
  0.91000000   2.17959469
  0.91000000   2.17958997
  0.91000000   2.17958560
  0.91000000   2.17958154
  0.91000000   2.17957776
  0.91000000   2.17957424
  0.91000000   2.17957094
  0.91000000   2.17956784
  0.91000000   2.17956493
  0.91000000   2.17956220
  0.91000000   2.17955961
  0.91000000   2.17955717
  0.91000000   2.17955486
  0.91000000   2.17955267
  0.91000000   2.17955059
  0.91000000   2.17954861
  0.91000000   2.17954673
  0.91000000   2.17954493
  0.91000000   2.17954322
  0.91000000   2.17954158
  0.91010000   2.18017516
  0.91010000   2.18016908
  0.91010000   2.18016351
  0.91010000   2.18015838
  0.91010000   2.18015366
  0.91010000   2.18014929
  0.91010000   2.18014523
  0.91010000   2.18014145
  0.91010000   2.18013792
  0.91010000   2.18013462
  0.91010000   2.18013153
  0.91010000   2.18012862
  0.91010000   2.18012588
  0.91010000   2.18012329
  0.91010000   2.18012085
  0.91010000   2.18011854
  0.91010000   2.18011635
  0.91010000   2.18011427
  0.91010000   2.18011229
  0.91010000   2.18011040
  0.91010000   2.18010861
  0.91010000   2.18010689
  0.91010000   2.18010526
  0.91020000   2.18073708
  0.91020000   2.18073100
  0.91020000   2.18072543
  0.91020000   2.18072031
  0.91020000   2.18071558
  0.91020000   2.18071121
  0.91020000   2.18070715
  0.91020000   2.18070337
  0.91020000   2.18069984
  0.91020000   2.18069654
  0.91020000   2.18069344
  0.91020000   2.18069053
  0.91020000   2.18068779
  0.91020000   2.18068521
  0.91020000   2.18068276
  0.91020000   2.18068045
  0.91020000   2.18067826
  0.91020000   2.18067618
  0.91020000   2.18067420
  0.91020000   2.18067231
  0.91020000   2.18067051
  0.91020000   2.18066880
  0.91020000   2.18066716
  0.91030000   2.18129725
  0.91030000   2.18129116
  0.91030000   2.18128559
  0.91030000   2.18128047
  0.91030000   2.18127574
  0.91030000   2.18127137
  0.91030000   2.18126731
  0.91030000   2.18126353
  0.91030000   2.18126000
  0.91030000   2.18125670
  0.91030000   2.18125360
  0.91030000   2.18125069
  0.91030000   2.18124795
  0.91030000   2.18124536
  0.91030000   2.18124292
  0.91030000   2.18124060
  0.91030000   2.18123841
  0.91030000   2.18123633
  0.91030000   2.18123435
  0.91030000   2.18123246
  0.91030000   2.18123066
  0.91030000   2.18122895
  0.91030000   2.18122731
  0.91040000   2.18185566
  0.91040000   2.18184958
  0.91040000   2.18184401
  0.91040000   2.18183888
  0.91040000   2.18183416
  0.91040000   2.18182978
  0.91040000   2.18182572
  0.91040000   2.18182194
  0.91040000   2.18181841
  0.91040000   2.18181511
  0.91040000   2.18181201
  0.91040000   2.18180910
  0.91040000   2.18180635
  0.91040000   2.18180377
  0.91040000   2.18180132
  0.91040000   2.18179901
  0.91040000   2.18179681
  0.91040000   2.18179473
  0.91040000   2.18179275
  0.91040000   2.18179086
  0.91040000   2.18178906
  0.91040000   2.18178735
  0.91040000   2.18178571
  0.91050000   2.18241234
  0.91050000   2.18240625
  0.91050000   2.18240068
  0.91050000   2.18239556
  0.91050000   2.18239083
  0.91050000   2.18238645
  0.91050000   2.18238239
  0.91050000   2.18237861
  0.91050000   2.18237508
  0.91050000   2.18237177
  0.91050000   2.18236867
  0.91050000   2.18236576
  0.91050000   2.18236302
  0.91050000   2.18236043
  0.91050000   2.18235798
  0.91050000   2.18235567
  0.91050000   2.18235347
  0.91050000   2.18235139
  0.91050000   2.18234941
  0.91050000   2.18234752
  0.91050000   2.18234572
  0.91050000   2.18234401
  0.91050000   2.18234237
  0.91060000   2.18296728
  0.91060000   2.18296120
  0.91060000   2.18295562
  0.91060000   2.18295050
  0.91060000   2.18294577
  0.91060000   2.18294140
  0.91060000   2.18293733
  0.91060000   2.18293355
  0.91060000   2.18293002
  0.91060000   2.18292671
  0.91060000   2.18292361
  0.91060000   2.18292070
  0.91060000   2.18291795
  0.91060000   2.18291536
  0.91060000   2.18291292
  0.91060000   2.18291060
  0.91060000   2.18290841
  0.91060000   2.18290632
  0.91060000   2.18290434
  0.91060000   2.18290245
  0.91060000   2.18290065
  0.91060000   2.18289893
  0.91060000   2.18289729
  0.91070000   2.18352050
  0.91070000   2.18351442
  0.91070000   2.18350884
  0.91070000   2.18350372
  0.91070000   2.18349899
  0.91070000   2.18349461
  0.91070000   2.18349055
  0.91070000   2.18348676
  0.91070000   2.18348323
  0.91070000   2.18347993
  0.91070000   2.18347682
  0.91070000   2.18347391
  0.91070000   2.18347117
  0.91070000   2.18346858
  0.91070000   2.18346613
  0.91070000   2.18346381
  0.91070000   2.18346161
  0.91070000   2.18345953
  0.91070000   2.18345754
  0.91070000   2.18345566
  0.91070000   2.18345386
  0.91070000   2.18345214
  0.91070000   2.18345050
  0.91080000   2.18407201
  0.91080000   2.18406592
  0.91080000   2.18406035
  0.91080000   2.18405523
  0.91080000   2.18405050
  0.91080000   2.18404612
  0.91080000   2.18404205
  0.91080000   2.18403827
  0.91080000   2.18403473
  0.91080000   2.18403143
  0.91080000   2.18402833
  0.91080000   2.18402541
  0.91080000   2.18402266
  0.91080000   2.18402007
  0.91080000   2.18401763
  0.91080000   2.18401531
  0.91080000   2.18401311
  0.91080000   2.18401102
  0.91080000   2.18400904
  0.91080000   2.18400715
  0.91080000   2.18400535
  0.91080000   2.18400363
  0.91080000   2.18400199
  0.91090000   2.18462181
  0.91090000   2.18461573
  0.91090000   2.18461015
  0.91090000   2.18460503
  0.91090000   2.18460030
  0.91090000   2.18459592
  0.91090000   2.18459185
  0.91090000   2.18458807
  0.91090000   2.18458453
  0.91090000   2.18458123
  0.91090000   2.18457812
  0.91090000   2.18457521
  0.91090000   2.18457246
  0.91090000   2.18456987
  0.91090000   2.18456742
  0.91090000   2.18456510
  0.91090000   2.18456290
  0.91090000   2.18456081
  0.91090000   2.18455883
  0.91090000   2.18455694
  0.91090000   2.18455514
  0.91090000   2.18455342
  0.91090000   2.18455178
  0.91100000   2.18516992
  0.91100000   2.18516384
  0.91100000   2.18515826
  0.91100000   2.18515313
  0.91100000   2.18514840
  0.91100000   2.18514402
  0.91100000   2.18513996
  0.91100000   2.18513617
  0.91100000   2.18513264
  0.91100000   2.18512933
  0.91100000   2.18512622
  0.91100000   2.18512331
  0.91100000   2.18512056
  0.91100000   2.18511797
  0.91100000   2.18511552
  0.91100000   2.18511320
  0.91100000   2.18511100
  0.91100000   2.18510891
  0.91100000   2.18510693
  0.91100000   2.18510504
  0.91100000   2.18510323
  0.91100000   2.18510151
  0.91100000   2.18509987
  0.91110000   2.18571634
  0.91110000   2.18571026
  0.91110000   2.18570468
  0.91110000   2.18569955
  0.91110000   2.18569482
  0.91110000   2.18569044
  0.91110000   2.18568638
  0.91110000   2.18568259
  0.91110000   2.18567905
  0.91110000   2.18567574
  0.91110000   2.18567264
  0.91110000   2.18566972
  0.91110000   2.18566697
  0.91110000   2.18566438
  0.91110000   2.18566193
  0.91110000   2.18565961
  0.91110000   2.18565741
  0.91110000   2.18565532
  0.91110000   2.18565333
  0.91110000   2.18565144
  0.91110000   2.18564964
  0.91110000   2.18564792
  0.91110000   2.18564628
  0.91120000   2.18626109
  0.91120000   2.18625500
  0.91120000   2.18624942
  0.91120000   2.18624430
  0.91120000   2.18623957
  0.91120000   2.18623519
  0.91120000   2.18623112
  0.91120000   2.18622733
  0.91120000   2.18622379
  0.91120000   2.18622048
  0.91120000   2.18621738
  0.91120000   2.18621446
  0.91120000   2.18621171
  0.91120000   2.18620911
  0.91120000   2.18620666
  0.91120000   2.18620434
  0.91120000   2.18620214
  0.91120000   2.18620005
  0.91120000   2.18619807
  0.91120000   2.18619617
  0.91120000   2.18619437
  0.91120000   2.18619265
  0.91120000   2.18619101
  0.91130000   2.18680416
  0.91130000   2.18679808
  0.91130000   2.18679250
  0.91130000   2.18678737
  0.91130000   2.18678264
  0.91130000   2.18677826
  0.91130000   2.18677419
  0.91130000   2.18677040
  0.91130000   2.18676686
  0.91130000   2.18676355
  0.91130000   2.18676044
  0.91130000   2.18675752
  0.91130000   2.18675477
  0.91130000   2.18675218
  0.91130000   2.18674973
  0.91130000   2.18674741
  0.91130000   2.18674521
  0.91130000   2.18674312
  0.91130000   2.18674113
  0.91130000   2.18673923
  0.91130000   2.18673743
  0.91130000   2.18673571
  0.91130000   2.18673406
  0.91140000   2.18734558
  0.91140000   2.18733949
  0.91140000   2.18733391
  0.91140000   2.18732878
  0.91140000   2.18732405
  0.91140000   2.18731967
  0.91140000   2.18731560
  0.91140000   2.18731181
  0.91140000   2.18730827
  0.91140000   2.18730496
  0.91140000   2.18730185
  0.91140000   2.18729893
  0.91140000   2.18729618
  0.91140000   2.18729359
  0.91140000   2.18729113
  0.91140000   2.18728881
  0.91140000   2.18728661
  0.91140000   2.18728452
  0.91140000   2.18728253
  0.91140000   2.18728064
  0.91140000   2.18727883
  0.91140000   2.18727711
  0.91140000   2.18727546
  0.91150000   2.18788534
  0.91150000   2.18787925
  0.91150000   2.18787368
  0.91150000   2.18786855
  0.91150000   2.18786381
  0.91150000   2.18785943
  0.91150000   2.18785536
  0.91150000   2.18785157
  0.91150000   2.18784803
  0.91150000   2.18784472
  0.91150000   2.18784161
  0.91150000   2.18783869
  0.91150000   2.18783594
  0.91150000   2.18783334
  0.91150000   2.18783089
  0.91150000   2.18782856
  0.91150000   2.18782636
  0.91150000   2.18782427
  0.91150000   2.18782228
  0.91150000   2.18782039
  0.91150000   2.18781858
  0.91150000   2.18781686
  0.91150000   2.18781521
  0.91160000   2.18842346
  0.91160000   2.18841737
  0.91160000   2.18841179
  0.91160000   2.18840666
  0.91160000   2.18840193
  0.91160000   2.18839755
  0.91160000   2.18839348
  0.91160000   2.18838968
  0.91160000   2.18838614
  0.91160000   2.18838283
  0.91160000   2.18837972
  0.91160000   2.18837680
  0.91160000   2.18837405
  0.91160000   2.18837145
  0.91160000   2.18836900
  0.91160000   2.18836667
  0.91160000   2.18836447
  0.91160000   2.18836238
  0.91160000   2.18836039
  0.91160000   2.18835849
  0.91160000   2.18835669
  0.91160000   2.18835496
  0.91160000   2.18835332
  0.91170000   2.18895995
  0.91170000   2.18895386
  0.91170000   2.18894828
  0.91170000   2.18894315
  0.91170000   2.18893841
  0.91170000   2.18893403
  0.91170000   2.18892996
  0.91170000   2.18892616
  0.91170000   2.18892262
  0.91170000   2.18891931
  0.91170000   2.18891620
  0.91170000   2.18891328
  0.91170000   2.18891052
  0.91170000   2.18890793
  0.91170000   2.18890547
  0.91170000   2.18890315
  0.91170000   2.18890094
  0.91170000   2.18889885
  0.91170000   2.18889686
  0.91170000   2.18889496
  0.91170000   2.18889316
  0.91170000   2.18889143
  0.91170000   2.18888979
  0.91180000   2.18949480
  0.91180000   2.18948871
  0.91180000   2.18948313
  0.91180000   2.18947800
  0.91180000   2.18947327
  0.91180000   2.18946888
  0.91180000   2.18946481
  0.91180000   2.18946102
  0.91180000   2.18945748
  0.91180000   2.18945416
  0.91180000   2.18945105
  0.91180000   2.18944813
  0.91180000   2.18944537
  0.91180000   2.18944278
  0.91180000   2.18944032
  0.91180000   2.18943799
  0.91180000   2.18943579
  0.91180000   2.18943370
  0.91180000   2.18943171
  0.91180000   2.18942981
  0.91180000   2.18942800
  0.91180000   2.18942628
  0.91180000   2.18942463
  0.91190000   2.19002804
  0.91190000   2.19002195
  0.91190000   2.19001637
  0.91190000   2.19001124
  0.91190000   2.19000651
  0.91190000   2.19000212
  0.91190000   2.18999805
  0.91190000   2.18999425
  0.91190000   2.18999071
  0.91190000   2.18998740
  0.91190000   2.18998428
  0.91190000   2.18998136
  0.91190000   2.18997861
  0.91190000   2.18997601
  0.91190000   2.18997355
  0.91190000   2.18997122
  0.91190000   2.18996902
  0.91190000   2.18996692
  0.91190000   2.18996493
  0.91190000   2.18996304
  0.91190000   2.18996123
  0.91190000   2.18995950
  0.91190000   2.18995785
  0.91200000   2.19055967
  0.91200000   2.19055358
  0.91200000   2.19054800
  0.91200000   2.19054287
  0.91200000   2.19053813
  0.91200000   2.19053375
  0.91200000   2.19052967
  0.91200000   2.19052588
  0.91200000   2.19052234
  0.91200000   2.19051902
  0.91200000   2.19051591
  0.91200000   2.19051298
  0.91200000   2.19051023
  0.91200000   2.19050763
  0.91200000   2.19050517
  0.91200000   2.19050284
  0.91200000   2.19050064
  0.91200000   2.19049854
  0.91200000   2.19049655
  0.91200000   2.19049465
  0.91200000   2.19049285
  0.91200000   2.19049112
  0.91200000   2.19048947
  0.91210000   2.19108970
  0.91210000   2.19108361
  0.91210000   2.19107803
  0.91210000   2.19107290
  0.91210000   2.19106816
  0.91210000   2.19106377
  0.91210000   2.19105970
  0.91210000   2.19105590
  0.91210000   2.19105236
  0.91210000   2.19104904
  0.91210000   2.19104593
  0.91210000   2.19104300
  0.91210000   2.19104025
  0.91210000   2.19103765
  0.91210000   2.19103519
  0.91210000   2.19103286
  0.91210000   2.19103066
  0.91210000   2.19102856
  0.91210000   2.19102657
  0.91210000   2.19102467
  0.91210000   2.19102286
  0.91210000   2.19102113
  0.91210000   2.19101948
  0.91220000   2.19161814
  0.91220000   2.19161204
  0.91220000   2.19160646
  0.91220000   2.19160133
  0.91220000   2.19159659
  0.91220000   2.19159221
  0.91220000   2.19158813
  0.91220000   2.19158433
  0.91220000   2.19158079
  0.91220000   2.19157747
  0.91220000   2.19157436
  0.91220000   2.19157143
  0.91220000   2.19156868
  0.91220000   2.19156607
  0.91220000   2.19156362
  0.91220000   2.19156129
  0.91220000   2.19155908
  0.91220000   2.19155698
  0.91220000   2.19155499
  0.91220000   2.19155309
  0.91220000   2.19155128
  0.91220000   2.19154956
  0.91220000   2.19154791
  0.91230000   2.19214498
  0.91230000   2.19213889
  0.91230000   2.19213331
  0.91230000   2.19212818
  0.91230000   2.19212344
  0.91230000   2.19211905
  0.91230000   2.19211498
  0.91230000   2.19211118
  0.91230000   2.19210763
  0.91230000   2.19210432
  0.91230000   2.19210120
  0.91230000   2.19209827
  0.91230000   2.19209552
  0.91230000   2.19209292
  0.91230000   2.19209046
  0.91230000   2.19208813
  0.91230000   2.19208592
  0.91230000   2.19208382
  0.91230000   2.19208183
  0.91230000   2.19207993
  0.91230000   2.19207812
  0.91230000   2.19207639
  0.91230000   2.19207474
  0.91240000   2.19267693
  0.91240000   2.19267026
  0.91240000   2.19266416
  0.91240000   2.19265858
  0.91240000   2.19265345
  0.91240000   2.19264871
  0.91240000   2.19264432
  0.91240000   2.19264024
  0.91240000   2.19263645
  0.91240000   2.19263290
  0.91240000   2.19262958
  0.91240000   2.19262647
  0.91240000   2.19262354
  0.91240000   2.19262078
  0.91240000   2.19261818
  0.91240000   2.19261572
  0.91240000   2.19261339
  0.91240000   2.19261118
  0.91240000   2.19260908
  0.91240000   2.19260709
  0.91240000   2.19260519
  0.91240000   2.19260338
  0.91240000   2.19260165
  0.91240000   2.19260000
  0.91250000   2.19320063
  0.91250000   2.19319396
  0.91250000   2.19318786
  0.91250000   2.19318228
  0.91250000   2.19317715
  0.91250000   2.19317241
  0.91250000   2.19316802
  0.91250000   2.19316394
  0.91250000   2.19316015
  0.91250000   2.19315660
  0.91250000   2.19315328
  0.91250000   2.19315016
  0.91250000   2.19314723
  0.91250000   2.19314448
  0.91250000   2.19314187
  0.91250000   2.19313941
  0.91250000   2.19313708
  0.91250000   2.19313487
  0.91250000   2.19313277
  0.91250000   2.19313078
  0.91250000   2.19312888
  0.91250000   2.19312707
  0.91250000   2.19312534
  0.91250000   2.19312369
  0.91260000   2.19372277
  0.91260000   2.19371610
  0.91260000   2.19371001
  0.91260000   2.19370442
  0.91260000   2.19369929
  0.91260000   2.19369455
  0.91260000   2.19369016
  0.91260000   2.19368608
  0.91260000   2.19368228
  0.91260000   2.19367874
  0.91260000   2.19367541
  0.91260000   2.19367230
  0.91260000   2.19366937
  0.91260000   2.19366661
  0.91260000   2.19366401
  0.91260000   2.19366154
  0.91260000   2.19365921
  0.91260000   2.19365700
  0.91260000   2.19365490
  0.91260000   2.19365291
  0.91260000   2.19365101
  0.91260000   2.19364920
  0.91260000   2.19364747
  0.91260000   2.19364581
  0.91270000   2.19424336
  0.91270000   2.19423669
  0.91270000   2.19423059
  0.91270000   2.19422501
  0.91270000   2.19421987
  0.91270000   2.19421513
  0.91270000   2.19421074
  0.91270000   2.19420666
  0.91270000   2.19420287
  0.91270000   2.19419932
  0.91270000   2.19419600
  0.91270000   2.19419288
  0.91270000   2.19418995
  0.91270000   2.19418719
  0.91270000   2.19418459
  0.91270000   2.19418212
  0.91270000   2.19417979
  0.91270000   2.19417758
  0.91270000   2.19417548
  0.91270000   2.19417348
  0.91270000   2.19417158
  0.91270000   2.19416977
  0.91270000   2.19416804
  0.91270000   2.19416639
  0.91280000   2.19476240
  0.91280000   2.19475573
  0.91280000   2.19474963
  0.91280000   2.19474405
  0.91280000   2.19473891
  0.91280000   2.19473417
  0.91280000   2.19472978
  0.91280000   2.19472570
  0.91280000   2.19472190
  0.91280000   2.19471835
  0.91280000   2.19471503
  0.91280000   2.19471191
  0.91280000   2.19470898
  0.91280000   2.19470622
  0.91280000   2.19470362
  0.91280000   2.19470116
  0.91280000   2.19469882
  0.91280000   2.19469661
  0.91280000   2.19469451
  0.91280000   2.19469251
  0.91280000   2.19469061
  0.91280000   2.19468880
  0.91280000   2.19468707
  0.91280000   2.19468542
  0.91290000   2.19527990
  0.91290000   2.19527323
  0.91290000   2.19526713
  0.91290000   2.19526155
  0.91290000   2.19525642
  0.91290000   2.19525167
  0.91290000   2.19524728
  0.91290000   2.19524320
  0.91290000   2.19523940
  0.91290000   2.19523585
  0.91290000   2.19523253
  0.91290000   2.19522941
  0.91290000   2.19522648
  0.91290000   2.19522372
  0.91290000   2.19522111
  0.91290000   2.19521865
  0.91290000   2.19521632
  0.91290000   2.19521411
  0.91290000   2.19521201
  0.91290000   2.19521001
  0.91290000   2.19520811
  0.91290000   2.19520629
  0.91290000   2.19520456
  0.91290000   2.19520291
  0.91300000   2.19579587
  0.91300000   2.19578921
  0.91300000   2.19578310
  0.91300000   2.19577752
  0.91300000   2.19577239
  0.91300000   2.19576765
  0.91300000   2.19576325
  0.91300000   2.19575917
  0.91300000   2.19575537
  0.91300000   2.19575182
  0.91300000   2.19574850
  0.91300000   2.19574538
  0.91300000   2.19574245
  0.91300000   2.19573969
  0.91300000   2.19573708
  0.91300000   2.19573461
  0.91300000   2.19573228
  0.91300000   2.19573007
  0.91300000   2.19572797
  0.91300000   2.19572597
  0.91300000   2.19572407
  0.91300000   2.19572225
  0.91300000   2.19572052
  0.91300000   2.19571887
  0.91310000   2.19631031
  0.91310000   2.19630366
  0.91310000   2.19629755
  0.91310000   2.19629197
  0.91310000   2.19628684
  0.91310000   2.19628209
  0.91310000   2.19627770
  0.91310000   2.19627362
  0.91310000   2.19626982
  0.91310000   2.19626627
  0.91310000   2.19626294
  0.91310000   2.19625982
  0.91310000   2.19625689
  0.91310000   2.19625413
  0.91310000   2.19625152
  0.91310000   2.19624906
  0.91310000   2.19624672
  0.91310000   2.19624451
  0.91310000   2.19624241
  0.91310000   2.19624041
  0.91310000   2.19623851
  0.91310000   2.19623669
  0.91310000   2.19623496
  0.91310000   2.19623330
  0.91320000   2.19682324
  0.91320000   2.19681659
  0.91320000   2.19681049
  0.91320000   2.19680491
  0.91320000   2.19679977
  0.91320000   2.19679503
  0.91320000   2.19679063
  0.91320000   2.19678655
  0.91320000   2.19678275
  0.91320000   2.19677920
  0.91320000   2.19677587
  0.91320000   2.19677275
  0.91320000   2.19676982
  0.91320000   2.19676706
  0.91320000   2.19676445
  0.91320000   2.19676198
  0.91320000   2.19675965
  0.91320000   2.19675744
  0.91320000   2.19675533
  0.91320000   2.19675333
  0.91320000   2.19675143
  0.91320000   2.19674961
  0.91320000   2.19674788
  0.91320000   2.19674623
  0.91330000   2.19733466
  0.91330000   2.19732802
  0.91330000   2.19732191
  0.91330000   2.19731634
  0.91330000   2.19731119
  0.91330000   2.19730645
  0.91330000   2.19730206
  0.91330000   2.19729798
  0.91330000   2.19729417
  0.91330000   2.19729062
  0.91330000   2.19728729
  0.91330000   2.19728418
  0.91330000   2.19728124
  0.91330000   2.19727848
  0.91330000   2.19727587
  0.91330000   2.19727340
  0.91330000   2.19727107
  0.91330000   2.19726885
  0.91330000   2.19726675
  0.91330000   2.19726475
  0.91330000   2.19726285
  0.91330000   2.19726103
  0.91330000   2.19725930
  0.91330000   2.19725764
  0.91340000   2.19784459
  0.91340000   2.19783795
  0.91340000   2.19783184
  0.91340000   2.19782626
  0.91340000   2.19782112
  0.91340000   2.19781638
  0.91340000   2.19781198
  0.91340000   2.19780790
  0.91340000   2.19780410
  0.91340000   2.19780054
  0.91340000   2.19779722
  0.91340000   2.19779410
  0.91340000   2.19779116
  0.91340000   2.19778840
  0.91340000   2.19778579
  0.91340000   2.19778332
  0.91340000   2.19778099
  0.91340000   2.19777877
  0.91340000   2.19777667
  0.91340000   2.19777467
  0.91340000   2.19777276
  0.91340000   2.19777095
  0.91340000   2.19776921
  0.91340000   2.19776756
  0.91350000   2.19835301
  0.91350000   2.19834639
  0.91350000   2.19834027
  0.91350000   2.19833470
  0.91350000   2.19832955
  0.91350000   2.19832481
  0.91350000   2.19832041
  0.91350000   2.19831633
  0.91350000   2.19831253
  0.91350000   2.19830897
  0.91350000   2.19830565
  0.91350000   2.19830253
  0.91350000   2.19829959
  0.91350000   2.19829683
  0.91350000   2.19829422
  0.91350000   2.19829175
  0.91350000   2.19828941
  0.91350000   2.19828720
  0.91350000   2.19828509
  0.91350000   2.19828309
  0.91350000   2.19828119
  0.91350000   2.19827937
  0.91350000   2.19827764
  0.91350000   2.19827598
  0.91360000   2.19885995
  0.91360000   2.19885334
  0.91360000   2.19884722
  0.91360000   2.19884165
  0.91360000   2.19883650
  0.91360000   2.19883176
  0.91360000   2.19882736
  0.91360000   2.19882328
  0.91360000   2.19881947
  0.91360000   2.19881592
  0.91360000   2.19881259
  0.91360000   2.19880947
  0.91360000   2.19880653
  0.91360000   2.19880377
  0.91360000   2.19880116
  0.91360000   2.19879869
  0.91360000   2.19879635
  0.91360000   2.19879414
  0.91360000   2.19879203
  0.91360000   2.19879003
  0.91360000   2.19878813
  0.91360000   2.19878631
  0.91360000   2.19878457
  0.91360000   2.19878292
  0.91370000   2.19936542
  0.91370000   2.19935882
  0.91370000   2.19935268
  0.91370000   2.19934712
  0.91370000   2.19934197
  0.91370000   2.19933723
  0.91370000   2.19933283
  0.91370000   2.19932875
  0.91370000   2.19932494
  0.91370000   2.19932139
  0.91370000   2.19931806
  0.91370000   2.19931494
  0.91370000   2.19931200
  0.91370000   2.19930923
  0.91370000   2.19930662
  0.91370000   2.19930416
  0.91370000   2.19930182
  0.91370000   2.19929960
  0.91370000   2.19929750
  0.91370000   2.19929549
  0.91370000   2.19929359
  0.91370000   2.19929177
  0.91370000   2.19929003
  0.91370000   2.19928838
  0.91380000   2.19986941
  0.91380000   2.19986282
  0.91380000   2.19985668
  0.91380000   2.19985112
  0.91380000   2.19984597
  0.91380000   2.19984123
  0.91380000   2.19983683
  0.91380000   2.19983275
  0.91380000   2.19982894
  0.91380000   2.19982538
  0.91380000   2.19982206
  0.91380000   2.19981893
  0.91380000   2.19981599
  0.91380000   2.19981323
  0.91380000   2.19981062
  0.91380000   2.19980815
  0.91380000   2.19980581
  0.91380000   2.19980359
  0.91380000   2.19980149
  0.91380000   2.19979948
  0.91380000   2.19979758
  0.91380000   2.19979576
  0.91380000   2.19979402
  0.91380000   2.19979237
  0.91390000   2.20037193
  0.91390000   2.20036536
  0.91390000   2.20035921
  0.91390000   2.20035366
  0.91390000   2.20034850
  0.91390000   2.20034376
  0.91390000   2.20033936
  0.91390000   2.20033528
  0.91390000   2.20033147
  0.91390000   2.20032792
  0.91390000   2.20032459
  0.91390000   2.20032146
  0.91390000   2.20031853
  0.91390000   2.20031576
  0.91390000   2.20031315
  0.91390000   2.20031068
  0.91390000   2.20030834
  0.91390000   2.20030612
  0.91390000   2.20030402
  0.91390000   2.20030201
  0.91390000   2.20030011
  0.91390000   2.20029829
  0.91390000   2.20029655
  0.91390000   2.20029489
  0.91400000   2.20087300
  0.91400000   2.20086645
  0.91400000   2.20086029
  0.91400000   2.20085474
  0.91400000   2.20084958
  0.91400000   2.20084484
  0.91400000   2.20084044
  0.91400000   2.20083636
  0.91400000   2.20083255
  0.91400000   2.20082900
  0.91400000   2.20082566
  0.91400000   2.20082254
  0.91400000   2.20081960
  0.91400000   2.20081683
  0.91400000   2.20081422
  0.91400000   2.20081175
  0.91400000   2.20080941
  0.91400000   2.20080720
  0.91400000   2.20080509
  0.91400000   2.20080308
  0.91400000   2.20080118
  0.91400000   2.20079936
  0.91400000   2.20079762
  0.91400000   2.20079596
  0.91410000   2.20137261
  0.91410000   2.20136609
  0.91410000   2.20135992
  0.91410000   2.20135437
  0.91410000   2.20134921
  0.91410000   2.20134447
  0.91410000   2.20134007
  0.91410000   2.20133599
  0.91410000   2.20133218
  0.91410000   2.20132862
  0.91410000   2.20132529
  0.91410000   2.20132217
  0.91410000   2.20131923
  0.91410000   2.20131646
  0.91410000   2.20131385
  0.91410000   2.20131138
  0.91410000   2.20130904
  0.91410000   2.20130682
  0.91410000   2.20130471
  0.91410000   2.20130271
  0.91410000   2.20130080
  0.91410000   2.20129898
  0.91410000   2.20129724
  0.91410000   2.20129558
  0.91420000   2.20187078
  0.91420000   2.20186429
  0.91420000   2.20185810
  0.91420000   2.20185256
  0.91420000   2.20184740
  0.91420000   2.20184266
  0.91420000   2.20183826
  0.91420000   2.20183418
  0.91420000   2.20183037
  0.91420000   2.20182681
  0.91420000   2.20182348
  0.91420000   2.20182035
  0.91420000   2.20181741
  0.91420000   2.20181465
  0.91420000   2.20181203
  0.91420000   2.20180956
  0.91420000   2.20180722
  0.91420000   2.20180500
  0.91420000   2.20180289
  0.91420000   2.20180089
  0.91420000   2.20179898
  0.91420000   2.20179716
  0.91420000   2.20179542
  0.91420000   2.20179376
  0.91430000   2.20236752
  0.91430000   2.20236106
  0.91430000   2.20235485
  0.91430000   2.20234932
  0.91430000   2.20234415
  0.91430000   2.20233942
  0.91430000   2.20233501
  0.91430000   2.20233093
  0.91430000   2.20232712
  0.91430000   2.20232356
  0.91430000   2.20232023
  0.91430000   2.20231710
  0.91430000   2.20231416
  0.91430000   2.20231139
  0.91430000   2.20230878
  0.91430000   2.20230631
  0.91430000   2.20230397
  0.91430000   2.20230175
  0.91430000   2.20229964
  0.91430000   2.20229764
  0.91430000   2.20229573
  0.91430000   2.20229391
  0.91430000   2.20229217
  0.91430000   2.20229051
  0.91440000   2.20286282
  0.91440000   2.20285640
  0.91440000   2.20285017
  0.91440000   2.20284465
  0.91440000   2.20283948
  0.91440000   2.20283475
  0.91440000   2.20283034
  0.91440000   2.20282625
  0.91440000   2.20282244
  0.91440000   2.20281889
  0.91440000   2.20281555
  0.91440000   2.20281243
  0.91440000   2.20280949
  0.91440000   2.20280672
  0.91440000   2.20280410
  0.91440000   2.20280163
  0.91440000   2.20279929
  0.91440000   2.20279707
  0.91440000   2.20279496
  0.91440000   2.20279295
  0.91440000   2.20279104
  0.91440000   2.20278922
  0.91440000   2.20278748
  0.91440000   2.20278582
  0.91450000   2.20335670
  0.91450000   2.20335032
  0.91450000   2.20334407
  0.91450000   2.20333856
  0.91450000   2.20333338
  0.91450000   2.20332865
  0.91450000   2.20332424
  0.91450000   2.20332016
  0.91450000   2.20331635
  0.91450000   2.20331279
  0.91450000   2.20330946
  0.91450000   2.20330633
  0.91450000   2.20330339
  0.91450000   2.20330062
  0.91450000   2.20329800
  0.91450000   2.20329553
  0.91450000   2.20329319
  0.91450000   2.20329097
  0.91450000   2.20328886
  0.91450000   2.20328685
  0.91450000   2.20328494
  0.91450000   2.20328312
  0.91450000   2.20328138
  0.91450000   2.20327972
  0.91460000   2.20384916
  0.91460000   2.20384282
  0.91460000   2.20383655
  0.91460000   2.20383106
  0.91460000   2.20382587
  0.91460000   2.20382114
  0.91460000   2.20381673
  0.91460000   2.20381265
  0.91460000   2.20380884
  0.91460000   2.20380528
  0.91460000   2.20380194
  0.91460000   2.20379882
  0.91460000   2.20379588
  0.91460000   2.20379311
  0.91460000   2.20379049
  0.91460000   2.20378802
  0.91460000   2.20378567
  0.91460000   2.20378345
  0.91460000   2.20378134
  0.91460000   2.20377934
  0.91460000   2.20377743
  0.91460000   2.20377560
  0.91460000   2.20377386
  0.91460000   2.20377220
  0.91470000   2.20434021
  0.91470000   2.20433393
  0.91470000   2.20432762
  0.91470000   2.20432215
  0.91470000   2.20431695
  0.91470000   2.20431223
  0.91470000   2.20430781
  0.91470000   2.20430373
  0.91470000   2.20429992
  0.91470000   2.20429636
  0.91470000   2.20429303
  0.91470000   2.20428990
  0.91470000   2.20428696
  0.91470000   2.20428418
  0.91470000   2.20428157
  0.91470000   2.20427909
  0.91470000   2.20427675
  0.91470000   2.20427453
  0.91470000   2.20427242
  0.91470000   2.20427041
  0.91470000   2.20426850
  0.91470000   2.20426668
  0.91470000   2.20426494
  0.91470000   2.20426328
  0.91480000   2.20482985
  0.91480000   2.20482364
  0.91480000   2.20481729
  0.91480000   2.20481184
  0.91480000   2.20480663
  0.91480000   2.20480192
  0.91480000   2.20479749
  0.91480000   2.20479342
  0.91480000   2.20478960
  0.91480000   2.20478604
  0.91480000   2.20478271
  0.91480000   2.20477958
  0.91480000   2.20477664
  0.91480000   2.20477386
  0.91480000   2.20477125
  0.91480000   2.20476877
  0.91480000   2.20476643
  0.91480000   2.20476421
  0.91480000   2.20476210
  0.91480000   2.20476009
  0.91480000   2.20475818
  0.91480000   2.20475636
  0.91480000   2.20475461
  0.91480000   2.20475295
  0.91490000   2.20531809
  0.91490000   2.20531195
  0.91490000   2.20530557
  0.91490000   2.20530014
  0.91490000   2.20529491
  0.91490000   2.20529021
  0.91490000   2.20528578
  0.91490000   2.20528171
  0.91490000   2.20527789
  0.91490000   2.20527433
  0.91490000   2.20527099
  0.91490000   2.20526787
  0.91490000   2.20526492
  0.91490000   2.20526215
  0.91490000   2.20525953
  0.91490000   2.20525706
  0.91490000   2.20525472
  0.91490000   2.20525249
  0.91490000   2.20525038
  0.91490000   2.20524837
  0.91490000   2.20524646
  0.91490000   2.20524464
  0.91490000   2.20524290
  0.91490000   2.20524123
  0.91500000   2.20580495
  0.91500000   2.20579889
  0.91500000   2.20579246
  0.91500000   2.20578705
  0.91500000   2.20578181
  0.91500000   2.20577711
  0.91500000   2.20577268
  0.91500000   2.20576861
  0.91500000   2.20576479
  0.91500000   2.20576123
  0.91500000   2.20575790
  0.91500000   2.20575477
  0.91500000   2.20575182
  0.91500000   2.20574905
  0.91500000   2.20574643
  0.91500000   2.20574396
  0.91500000   2.20574161
  0.91500000   2.20573939
  0.91500000   2.20573728
  0.91500000   2.20573527
  0.91500000   2.20573336
  0.91500000   2.20573153
  0.91500000   2.20572979
  0.91500000   2.20572813
  0.91510000   2.20629041
  0.91510000   2.20628444
  0.91510000   2.20627796
  0.91510000   2.20627259
  0.91510000   2.20626733
  0.91510000   2.20626264
  0.91510000   2.20625820
  0.91510000   2.20625413
  0.91510000   2.20625031
  0.91510000   2.20624675
  0.91510000   2.20624342
  0.91510000   2.20624029
  0.91510000   2.20623734
  0.91510000   2.20623457
  0.91510000   2.20623195
  0.91510000   2.20622948
  0.91510000   2.20622713
  0.91510000   2.20622491
  0.91510000   2.20622280
  0.91510000   2.20622079
  0.91510000   2.20621887
  0.91510000   2.20621705
  0.91510000   2.20621531
  0.91510000   2.20621364
  0.91520000   2.20677449
  0.91520000   2.20676863
  0.91520000   2.20676209
  0.91520000   2.20675675
  0.91520000   2.20675147
  0.91520000   2.20674679
  0.91520000   2.20674235
  0.91520000   2.20673828
  0.91520000   2.20673446
  0.91520000   2.20673090
  0.91520000   2.20672756
  0.91520000   2.20672443
  0.91520000   2.20672149
  0.91520000   2.20671872
  0.91520000   2.20671610
  0.91520000   2.20671362
  0.91520000   2.20671128
  0.91520000   2.20670905
  0.91520000   2.20670694
  0.91520000   2.20670493
  0.91520000   2.20670302
  0.91520000   2.20670119
  0.91520000   2.20669945
  0.91520000   2.20669779
  0.91530000   2.20725720
  0.91530000   2.20725145
  0.91530000   2.20724485
  0.91530000   2.20723955
  0.91530000   2.20723424
  0.91530000   2.20722958
  0.91530000   2.20722513
  0.91530000   2.20722107
  0.91530000   2.20721724
  0.91530000   2.20721368
  0.91530000   2.20721034
  0.91530000   2.20720722
  0.91530000   2.20720427
  0.91530000   2.20720150
  0.91530000   2.20719888
  0.91530000   2.20719640
  0.91530000   2.20719405
  0.91530000   2.20719183
  0.91530000   2.20718972
  0.91530000   2.20718771
  0.91530000   2.20718579
  0.91530000   2.20718397
  0.91530000   2.20718223
  0.91530000   2.20718056
  0.91540000   2.20773854
  0.91540000   2.20773293
  0.91540000   2.20772624
  0.91540000   2.20772098
  0.91540000   2.20771566
  0.91540000   2.20771101
  0.91540000   2.20770655
  0.91540000   2.20770249
  0.91540000   2.20769866
  0.91540000   2.20769510
  0.91540000   2.20769176
  0.91540000   2.20768863
  0.91540000   2.20768569
  0.91540000   2.20768291
  0.91540000   2.20768029
  0.91540000   2.20767782
  0.91540000   2.20767547
  0.91540000   2.20767325
  0.91540000   2.20767113
  0.91540000   2.20766912
  0.91540000   2.20766721
  0.91540000   2.20766538
  0.91540000   2.20766364
  0.91540000   2.20766197
  0.91550000   2.20821852
  0.91550000   2.20821305
  0.91550000   2.20820628
  0.91550000   2.20820107
  0.91550000   2.20819571
  0.91550000   2.20819108
  0.91550000   2.20818661
  0.91550000   2.20818256
  0.91550000   2.20817872
  0.91550000   2.20817517
  0.91550000   2.20817183
  0.91550000   2.20816870
  0.91550000   2.20816575
  0.91550000   2.20816298
  0.91550000   2.20816036
  0.91550000   2.20815788
  0.91550000   2.20815554
  0.91550000   2.20815331
  0.91550000   2.20815120
  0.91550000   2.20814919
  0.91550000   2.20814727
  0.91550000   2.20814544
  0.91550000   2.20814370
  0.91550000   2.20814204
  0.91560000   2.20869713
  0.91560000   2.20869183
  0.91560000   2.20868496
  0.91560000   2.20867981
  0.91560000   2.20867442
  0.91560000   2.20866981
  0.91560000   2.20866533
  0.91560000   2.20866128
  0.91560000   2.20865744
  0.91560000   2.20865389
  0.91560000   2.20865055
  0.91560000   2.20864742
  0.91560000   2.20864447
  0.91560000   2.20864170
  0.91560000   2.20863908
  0.91560000   2.20863660
  0.91560000   2.20863425
  0.91560000   2.20863203
  0.91560000   2.20862991
  0.91560000   2.20862790
  0.91560000   2.20862599
  0.91560000   2.20862416
  0.91560000   2.20862242
  0.91560000   2.20862075
  0.91570000   2.20917440
  0.91570000   2.20916928
  0.91570000   2.20916230
  0.91570000   2.20915722
  0.91570000   2.20915179
  0.91570000   2.20914720
  0.91570000   2.20914270
  0.91570000   2.20913866
  0.91570000   2.20913482
  0.91570000   2.20913127
  0.91570000   2.20912793
  0.91570000   2.20912480
  0.91570000   2.20912185
  0.91570000   2.20911907
  0.91570000   2.20911645
  0.91570000   2.20911398
  0.91570000   2.20911163
  0.91570000   2.20910940
  0.91570000   2.20910729
  0.91570000   2.20910528
  0.91570000   2.20910336
  0.91570000   2.20910153
  0.91570000   2.20909979
  0.91570000   2.20909812
  0.91580000   2.20965031
  0.91580000   2.20964540
  0.91580000   2.20963830
  0.91580000   2.20963329
  0.91580000   2.20962782
  0.91580000   2.20962325
  0.91580000   2.20961874
  0.91580000   2.20961471
  0.91580000   2.20961086
  0.91580000   2.20960732
  0.91580000   2.20960397
  0.91580000   2.20960084
  0.91580000   2.20959789
  0.91580000   2.20959512
  0.91580000   2.20959249
  0.91580000   2.20959002
  0.91580000   2.20958767
  0.91580000   2.20958544
  0.91580000   2.20958333
  0.91580000   2.20958132
  0.91580000   2.20957940
  0.91580000   2.20957757
  0.91580000   2.20957583
  0.91580000   2.20957416
  0.91590000   2.21012489
  0.91590000   2.21012021
  0.91590000   2.21011297
  0.91590000   2.21010804
  0.91590000   2.21010252
  0.91590000   2.21009798
  0.91590000   2.21009345
  0.91590000   2.21008943
  0.91590000   2.21008558
  0.91590000   2.21008204
  0.91590000   2.21007868
  0.91590000   2.21007556
  0.91590000   2.21007261
  0.91590000   2.21006983
  0.91590000   2.21006721
  0.91590000   2.21006473
  0.91590000   2.21006238
  0.91590000   2.21006016
  0.91590000   2.21005804
  0.91590000   2.21005603
  0.91590000   2.21005411
  0.91590000   2.21005228
  0.91590000   2.21005054
  0.91590000   2.21004887
  0.91600000   2.21059812
  0.91600000   2.21059370
  0.91600000   2.21058631
  0.91600000   2.21058147
  0.91600000   2.21057589
  0.91600000   2.21057139
  0.91600000   2.21056684
  0.91600000   2.21056283
  0.91600000   2.21055897
  0.91600000   2.21055543
  0.91600000   2.21055208
  0.91600000   2.21054895
  0.91600000   2.21054600
  0.91600000   2.21054322
  0.91600000   2.21054060
  0.91600000   2.21053812
  0.91600000   2.21053577
  0.91600000   2.21053355
  0.91600000   2.21053143
  0.91600000   2.21052942
  0.91600000   2.21052750
  0.91600000   2.21052567
  0.91600000   2.21052393
  0.91600000   2.21052226
  0.91610000   2.21107002
  0.91610000   2.21106589
  0.91610000   2.21105832
  0.91610000   2.21105359
  0.91610000   2.21104795
  0.91610000   2.21104348
  0.91610000   2.21103891
  0.91610000   2.21103492
  0.91610000   2.21103104
  0.91610000   2.21102751
  0.91610000   2.21102415
  0.91610000   2.21102103
  0.91610000   2.21101808
  0.91610000   2.21101530
  0.91610000   2.21101268
  0.91610000   2.21101020
  0.91610000   2.21100785
  0.91610000   2.21100562
  0.91610000   2.21100350
  0.91610000   2.21100149
  0.91610000   2.21099958
  0.91610000   2.21099775
  0.91610000   2.21099600
  0.91610000   2.21099433
  0.91620000   2.21154059
  0.91620000   2.21153678
  0.91620000   2.21152902
  0.91620000   2.21152440
  0.91620000   2.21151869
  0.91620000   2.21151427
  0.91620000   2.21150967
  0.91620000   2.21150569
  0.91620000   2.21150181
  0.91620000   2.21149828
  0.91620000   2.21149492
  0.91620000   2.21149180
  0.91620000   2.21148884
  0.91620000   2.21148607
  0.91620000   2.21148344
  0.91620000   2.21148097
  0.91620000   2.21147862
  0.91620000   2.21147639
  0.91620000   2.21147427
  0.91620000   2.21147226
  0.91620000   2.21147034
  0.91620000   2.21146851
  0.91620000   2.21146677
  0.91620000   2.21146510
  0.91630000   2.21200984
  0.91630000   2.21200638
  0.91630000   2.21199840
  0.91630000   2.21199392
  0.91630000   2.21198813
  0.91630000   2.21198376
  0.91630000   2.21197913
  0.91630000   2.21197516
  0.91630000   2.21197127
  0.91630000   2.21196775
  0.91630000   2.21196438
  0.91630000   2.21196127
  0.91630000   2.21195831
  0.91630000   2.21195553
  0.91630000   2.21195291
  0.91630000   2.21195043
  0.91630000   2.21194808
  0.91630000   2.21194585
  0.91630000   2.21194373
  0.91630000   2.21194172
  0.91630000   2.21193980
  0.91630000   2.21193797
  0.91630000   2.21193623
  0.91630000   2.21193456
  0.91640000   2.21247776
  0.91640000   2.21247470
  0.91640000   2.21246648
  0.91640000   2.21246215
  0.91640000   2.21245626
  0.91640000   2.21245195
  0.91640000   2.21244728
  0.91640000   2.21244334
  0.91640000   2.21243943
  0.91640000   2.21243592
  0.91640000   2.21243255
  0.91640000   2.21242943
  0.91640000   2.21242647
  0.91640000   2.21242370
  0.91640000   2.21242107
  0.91640000   2.21241860
  0.91640000   2.21241624
  0.91640000   2.21241402
  0.91640000   2.21241190
  0.91640000   2.21240989
  0.91640000   2.21240797
  0.91640000   2.21240614
  0.91640000   2.21240439
  0.91640000   2.21240272
  0.91650000   2.21294437
  0.91650000   2.21294175
  0.91650000   2.21293325
  0.91650000   2.21292909
  0.91650000   2.21292310
  0.91650000   2.21291885
  0.91650000   2.21291415
  0.91650000   2.21291023
  0.91650000   2.21290631
  0.91650000   2.21290280
  0.91650000   2.21289943
  0.91650000   2.21289631
  0.91650000   2.21289335
  0.91650000   2.21289058
  0.91650000   2.21288795
  0.91650000   2.21288547
  0.91650000   2.21288312
  0.91650000   2.21288089
  0.91650000   2.21287877
  0.91650000   2.21287676
  0.91650000   2.21287484
  0.91650000   2.21287301
  0.91650000   2.21287127
  0.91650000   2.21286959
  0.91660000   2.21340966
  0.91660000   2.21340752
  0.91660000   2.21339873
  0.91660000   2.21339476
  0.91660000   2.21338865
  0.91660000   2.21338447
  0.91660000   2.21337972
  0.91660000   2.21337583
  0.91660000   2.21337189
  0.91660000   2.21336840
  0.91660000   2.21336502
  0.91660000   2.21336191
  0.91660000   2.21335894
  0.91660000   2.21335617
  0.91660000   2.21335354
  0.91660000   2.21335106
  0.91660000   2.21334871
  0.91660000   2.21334648
  0.91660000   2.21334436
  0.91660000   2.21334235
  0.91660000   2.21334043
  0.91660000   2.21333860
  0.91660000   2.21333685
  0.91660000   2.21333518
  0.91670000   2.21387365
  0.91670000   2.21387205
  0.91670000   2.21386292
  0.91670000   2.21385915
  0.91670000   2.21385292
  0.91670000   2.21384882
  0.91670000   2.21384402
  0.91670000   2.21384016
  0.91670000   2.21383620
  0.91670000   2.21383272
  0.91670000   2.21382933
  0.91670000   2.21382622
  0.91670000   2.21382325
  0.91670000   2.21382048
  0.91670000   2.21381785
  0.91670000   2.21381537
  0.91670000   2.21381302
  0.91670000   2.21381079
  0.91670000   2.21380867
  0.91670000   2.21380666
  0.91670000   2.21380474
  0.91670000   2.21380291
  0.91670000   2.21380116
  0.91670000   2.21379949
  0.91680000   2.21433633
  0.91680000   2.21433531
  0.91680000   2.21432582
  0.91680000   2.21432228
  0.91680000   2.21431590
  0.91680000   2.21431189
  0.91680000   2.21430704
  0.91680000   2.21430321
  0.91680000   2.21429923
  0.91680000   2.21429576
  0.91680000   2.21429236
  0.91680000   2.21428926
  0.91680000   2.21428629
  0.91680000   2.21428352
  0.91680000   2.21428089
  0.91680000   2.21427841
  0.91680000   2.21427606
  0.91680000   2.21427383
  0.91680000   2.21427171
  0.91680000   2.21426970
  0.91680000   2.21426778
  0.91680000   2.21426595
  0.91680000   2.21426420
  0.91680000   2.21426253
  0.91690000   2.21479770
  0.91690000   2.21479734
  0.91690000   2.21478743
  0.91690000   2.21478416
  0.91690000   2.21477761
  0.91690000   2.21477371
  0.91690000   2.21476879
  0.91690000   2.21476500
  0.91690000   2.21476100
  0.91690000   2.21475754
  0.91690000   2.21475413
  0.91690000   2.21475104
  0.91690000   2.21474806
  0.91690000   2.21474530
  0.91690000   2.21474266
  0.91690000   2.21474019
  0.91690000   2.21473783
  0.91690000   2.21473560
  0.91690000   2.21473348
  0.91690000   2.21473147
  0.91690000   2.21472955
  0.91690000   2.21472772
  0.91690000   2.21472597
  0.91690000   2.21472430
  0.91700000   2.21525778
  0.91700000   2.21525813
  0.91700000   2.21524777
  0.91700000   2.21524478
  0.91700000   2.21523805
  0.91700000   2.21523427
  0.91700000   2.21522927
  0.91700000   2.21522553
  0.91700000   2.21522150
  0.91700000   2.21521806
  0.91700000   2.21521464
  0.91700000   2.21521155
  0.91700000   2.21520857
  0.91700000   2.21520581
  0.91700000   2.21520317
  0.91700000   2.21520070
  0.91700000   2.21519834
  0.91700000   2.21519611
  0.91700000   2.21519399
  0.91700000   2.21519198
  0.91700000   2.21519006
  0.91700000   2.21518823
  0.91700000   2.21518648
  0.91700000   2.21518481
  0.91710000   2.21571655
  0.91710000   2.21571770
  0.91710000   2.21570683
  0.91710000   2.21570417
  0.91710000   2.21569723
  0.91710000   2.21569358
  0.91710000   2.21568850
  0.91710000   2.21568481
  0.91710000   2.21568074
  0.91710000   2.21567733
  0.91710000   2.21567389
  0.91710000   2.21567081
  0.91710000   2.21566783
  0.91710000   2.21566507
  0.91710000   2.21566243
  0.91710000   2.21565995
  0.91710000   2.21565760
  0.91710000   2.21565537
  0.91710000   2.21565325
  0.91710000   2.21565123
  0.91710000   2.21564931
  0.91710000   2.21564748
  0.91710000   2.21564573
  0.91710000   2.21564406
  0.91720000   2.21617403
  0.91720000   2.21617604
  0.91720000   2.21616462
  0.91720000   2.21616232
  0.91720000   2.21615515
  0.91720000   2.21615164
  0.91720000   2.21614647
  0.91720000   2.21614285
  0.91720000   2.21613874
  0.91720000   2.21613535
  0.91720000   2.21613189
  0.91720000   2.21612882
  0.91720000   2.21612583
  0.91720000   2.21612308
  0.91720000   2.21612043
  0.91720000   2.21611796
  0.91720000   2.21611560
  0.91720000   2.21611337
  0.91720000   2.21611125
  0.91720000   2.21610924
  0.91720000   2.21610732
  0.91720000   2.21610548
  0.91720000   2.21610374
  0.91720000   2.21610206
  0.91730000   2.21663022
  0.91730000   2.21663318
  0.91730000   2.21662114
  0.91730000   2.21661924
  0.91730000   2.21661182
  0.91730000   2.21660847
  0.91730000   2.21660319
  0.91730000   2.21659964
  0.91730000   2.21659548
  0.91730000   2.21659212
  0.91730000   2.21658865
  0.91730000   2.21658559
  0.91730000   2.21658259
  0.91730000   2.21657984
  0.91730000   2.21657720
  0.91730000   2.21657472
  0.91730000   2.21657236
  0.91730000   2.21657014
  0.91730000   2.21656801
  0.91730000   2.21656600
  0.91730000   2.21656408
  0.91730000   2.21656225
  0.91730000   2.21656050
  0.91730000   2.21655883
  0.91740000   2.21708512
  0.91740000   2.21708912
  0.91740000   2.21707640
  0.91740000   2.21707494
  0.91740000   2.21706723
  0.91740000   2.21706407
  0.91740000   2.21705867
  0.91740000   2.21705519
  0.91740000   2.21705099
  0.91740000   2.21704766
  0.91740000   2.21704417
  0.91740000   2.21704112
  0.91740000   2.21703812
  0.91740000   2.21703537
  0.91740000   2.21703272
  0.91740000   2.21703025
  0.91740000   2.21702789
  0.91740000   2.21702566
  0.91740000   2.21702354
  0.91740000   2.21702152
  0.91740000   2.21701960
  0.91740000   2.21701777
  0.91740000   2.21701602
  0.91740000   2.21701435
  0.91750000   2.21753872
  0.91750000   2.21754386
  0.91750000   2.21753040
  0.91750000   2.21752942
  0.91750000   2.21752140
  0.91750000   2.21751845
  0.91750000   2.21751292
  0.91750000   2.21750952
  0.91750000   2.21750526
  0.91750000   2.21750197
  0.91750000   2.21749846
  0.91750000   2.21749542
  0.91750000   2.21749240
  0.91750000   2.21748966
  0.91750000   2.21748701
  0.91750000   2.21748454
  0.91750000   2.21748218
  0.91750000   2.21747995
  0.91750000   2.21747783
  0.91750000   2.21747581
  0.91750000   2.21747389
  0.91750000   2.21747206
  0.91750000   2.21747031
  0.91750000   2.21746864
  0.91760000   2.21799104
  0.91760000   2.21799742
  0.91760000   2.21798315
  0.91760000   2.21798270
  0.91760000   2.21797433
  0.91760000   2.21797160
  0.91760000   2.21796593
  0.91760000   2.21796263
  0.91760000   2.21795831
  0.91760000   2.21795505
  0.91760000   2.21795151
  0.91760000   2.21794850
  0.91760000   2.21794547
  0.91760000   2.21794273
  0.91760000   2.21794008
  0.91760000   2.21793761
  0.91760000   2.21793525
  0.91760000   2.21793302
  0.91760000   2.21793090
  0.91760000   2.21792888
  0.91760000   2.21792696
  0.91760000   2.21792513
  0.91760000   2.21792338
  0.91760000   2.21792170
  0.91770000   2.21844207
  0.91770000   2.21844981
  0.91770000   2.21843464
  0.91770000   2.21843478
  0.91770000   2.21842603
  0.91770000   2.21842355
  0.91770000   2.21841771
  0.91770000   2.21841452
  0.91770000   2.21841013
  0.91770000   2.21840692
  0.91770000   2.21840335
  0.91770000   2.21840035
  0.91770000   2.21839731
  0.91770000   2.21839458
  0.91770000   2.21839192
  0.91770000   2.21838946
  0.91770000   2.21838709
  0.91770000   2.21838487
  0.91770000   2.21838274
  0.91770000   2.21838073
  0.91770000   2.21837880
  0.91770000   2.21837697
  0.91770000   2.21837522
  0.91770000   2.21837355
  0.91780000   2.21889181
  0.91780000   2.21890103
  0.91780000   2.21888488
  0.91780000   2.21888567
  0.91780000   2.21887649
  0.91780000   2.21887430
  0.91780000   2.21886827
  0.91780000   2.21886520
  0.91780000   2.21886073
  0.91780000   2.21885757
  0.91780000   2.21885397
  0.91780000   2.21885099
  0.91780000   2.21884793
  0.91780000   2.21884522
  0.91780000   2.21884255
  0.91780000   2.21884009
  0.91780000   2.21883772
  0.91780000   2.21883550
  0.91780000   2.21883337
  0.91780000   2.21883135
  0.91780000   2.21882943
  0.91780000   2.21882760
  0.91780000   2.21882585
  0.91780000   2.21882418
  0.91790000   2.21934027
  0.91790000   2.21935110
  0.91790000   2.21933387
  0.91790000   2.21933538
  0.91790000   2.21932572
  0.91790000   2.21932385
  0.91790000   2.21931761
  0.91790000   2.21931468
  0.91790000   2.21931011
  0.91790000   2.21930702
  0.91790000   2.21930337
  0.91790000   2.21930043
  0.91790000   2.21929735
  0.91790000   2.21929464
  0.91790000   2.21929197
  0.91790000   2.21928951
  0.91790000   2.21928714
  0.91790000   2.21928492
  0.91790000   2.21928279
  0.91790000   2.21928078
  0.91790000   2.21927885
  0.91790000   2.21927702
  0.91790000   2.21927527
  0.91790000   2.21927359
  0.91800000   2.21978743
  0.91800000   2.21980002
  0.91800000   2.21978162
  0.91800000   2.21978392
  0.91800000   2.21977373
  0.91800000   2.21977221
  0.91800000   2.21976573
  0.91800000   2.21976296
  0.91800000   2.21975829
  0.91800000   2.21975526
  0.91800000   2.21975157
  0.91800000   2.21974866
  0.91800000   2.21974556
  0.91800000   2.21974287
  0.91800000   2.21974018
  0.91800000   2.21973773
  0.91800000   2.21973535
  0.91800000   2.21973314
  0.91800000   2.21973100
  0.91800000   2.21972899
  0.91800000   2.21972707
  0.91800000   2.21972523
  0.91800000   2.21972348
  0.91800000   2.21972181
  0.91810000   2.22023331
  0.91810000   2.22024781
  0.91810000   2.22022812
  0.91810000   2.22023129
  0.91810000   2.22022051
  0.91810000   2.22021938
  0.91810000   2.22021265
  0.91810000   2.22021005
  0.91810000   2.22020526
  0.91810000   2.22020231
  0.91810000   2.22019857
  0.91810000   2.22019569
  0.91810000   2.22019257
  0.91810000   2.22018989
  0.91810000   2.22018720
  0.91810000   2.22018475
  0.91810000   2.22018237
  0.91810000   2.22018016
  0.91810000   2.22017802
  0.91810000   2.22017601
  0.91810000   2.22017408
  0.91810000   2.22017225
  0.91810000   2.22017050
  0.91810000   2.22016883
  0.91820000   2.22067790
  0.91820000   2.22069447
  0.91820000   2.22067338
  0.91820000   2.22067749
  0.91820000   2.22066608
  0.91820000   2.22066538
  0.91820000   2.22065836
  0.91820000   2.22065595
  0.91820000   2.22065104
  0.91820000   2.22064818
  0.91820000   2.22064437
  0.91820000   2.22064153
  0.91820000   2.22063839
  0.91820000   2.22063572
  0.91820000   2.22063302
  0.91820000   2.22063058
  0.91820000   2.22062820
  0.91820000   2.22062598
  0.91820000   2.22062385
  0.91820000   2.22062184
  0.91820000   2.22061991
  0.91820000   2.22061808
  0.91820000   2.22061632
  0.91820000   2.22061465
  0.91830000   2.22112121
  0.91830000   2.22114002
  0.91830000   2.22111740
  0.91830000   2.22112255
  0.91830000   2.22111044
  0.91830000   2.22111021
  0.91830000   2.22110287
  0.91830000   2.22110068
  0.91830000   2.22109562
  0.91830000   2.22109285
  0.91830000   2.22108899
  0.91830000   2.22108619
  0.91830000   2.22108301
  0.91830000   2.22108037
  0.91830000   2.22107765
  0.91830000   2.22107522
  0.91830000   2.22107283
  0.91830000   2.22107062
  0.91830000   2.22106848
  0.91830000   2.22106647
  0.91830000   2.22106454
  0.91830000   2.22106271
  0.91830000   2.22106096
  0.91830000   2.22105929
  0.91840000   2.22156322
  0.91840000   2.22158446
  0.91840000   2.22156018
  0.91840000   2.22156647
  0.91840000   2.22155358
  0.91840000   2.22155388
  0.91840000   2.22154618
  0.91840000   2.22154423
  0.91840000   2.22153901
  0.91840000   2.22153636
  0.91840000   2.22153241
  0.91840000   2.22152966
  0.91840000   2.22152646
  0.91840000   2.22152384
  0.91840000   2.22152110
  0.91840000   2.22151868
  0.91840000   2.22151628
  0.91840000   2.22151408
  0.91840000   2.22151194
  0.91840000   2.22150993
  0.91840000   2.22150800
  0.91840000   2.22150617
  0.91840000   2.22150441
  0.91840000   2.22150274
  0.91850000   2.22200394
  0.91850000   2.22202781
  0.91850000   2.22200172
  0.91850000   2.22200925
  0.91850000   2.22199551
  0.91850000   2.22199640
  0.91850000   2.22198830
  0.91850000   2.22198662
  0.91850000   2.22198122
  0.91850000   2.22197869
  0.91850000   2.22197466
  0.91850000   2.22197197
  0.91850000   2.22196872
  0.91850000   2.22196613
  0.91850000   2.22196337
  0.91850000   2.22196097
  0.91850000   2.22195856
  0.91850000   2.22195636
  0.91850000   2.22195421
  0.91850000   2.22195221
  0.91850000   2.22195028
  0.91850000   2.22194845
  0.91850000   2.22194669
  0.91850000   2.22194502
  0.91860000   2.22244337
  0.91860000   2.22247008
  0.91860000   2.22244202
  0.91860000   2.22245092
  0.91860000   2.22243624
  0.91860000   2.22243777
  0.91860000   2.22242923
  0.91860000   2.22242785
  0.91860000   2.22242224
  0.91860000   2.22241985
  0.91860000   2.22241573
  0.91860000   2.22241310
  0.91860000   2.22240981
  0.91860000   2.22240725
  0.91860000   2.22240447
  0.91860000   2.22240208
  0.91860000   2.22239966
  0.91860000   2.22239747
  0.91860000   2.22239532
  0.91860000   2.22239332
  0.91860000   2.22239138
  0.91860000   2.22238955
  0.91860000   2.22238780
  0.91860000   2.22238613
  0.91870000   2.22288150
  0.91870000   2.22291128
  0.91870000   2.22288109
  0.91870000   2.22289146
  0.91870000   2.22287577
  0.91870000   2.22287800
  0.91870000   2.22286897
  0.91870000   2.22286793
  0.91870000   2.22286209
  0.91870000   2.22285986
  0.91870000   2.22285563
  0.91870000   2.22285307
  0.91870000   2.22284973
  0.91870000   2.22284720
  0.91870000   2.22284440
  0.91870000   2.22284203
  0.91870000   2.22283960
  0.91870000   2.22283741
  0.91870000   2.22283526
  0.91870000   2.22283326
  0.91870000   2.22283132
  0.91870000   2.22282949
  0.91870000   2.22282774
  0.91870000   2.22282607
  0.91880000   2.22331834
  0.91880000   2.22335142
  0.91880000   2.22331893
  0.91880000   2.22333090
  0.91880000   2.22331409
  0.91880000   2.22331710
  0.91880000   2.22330753
  0.91880000   2.22330687
  0.91880000   2.22330077
  0.91880000   2.22329871
  0.91880000   2.22329436
  0.91880000   2.22329189
  0.91880000   2.22328849
  0.91880000   2.22328600
  0.91880000   2.22328317
  0.91880000   2.22328082
  0.91880000   2.22327837
  0.91880000   2.22327620
  0.91880000   2.22327404
  0.91880000   2.22327204
  0.91880000   2.22327010
  0.91880000   2.22326827
  0.91880000   2.22326652
  0.91880000   2.22326485
  0.91890000   2.22375388
  0.91890000   2.22379051
  0.91890000   2.22375552
  0.91890000   2.22376925
  0.91890000   2.22375121
  0.91890000   2.22375507
  0.91890000   2.22374492
  0.91890000   2.22374466
  0.91890000   2.22373828
  0.91890000   2.22373642
  0.91890000   2.22373193
  0.91890000   2.22372955
  0.91890000   2.22372609
  0.91890000   2.22372364
  0.91890000   2.22372079
  0.91890000   2.22371845
  0.91890000   2.22371599
  0.91890000   2.22371383
  0.91890000   2.22371166
  0.91890000   2.22370967
  0.91890000   2.22370772
  0.91890000   2.22370590
  0.91890000   2.22370414
  0.91890000   2.22370247
  0.91900000   2.22418811
  0.91900000   2.22422856
  0.91900000   2.22419088
  0.91900000   2.22420650
  0.91900000   2.22418714
  0.91900000   2.22419193
  0.91900000   2.22418112
  0.91900000   2.22418132
  0.91900000   2.22417462
  0.91900000   2.22417298
  0.91900000   2.22416834
  0.91900000   2.22416607
  0.91900000   2.22416253
  0.91900000   2.22416014
  0.91900000   2.22415725
  0.91900000   2.22415494
  0.91900000   2.22415246
  0.91900000   2.22415030
  0.91900000   2.22414813
  0.91900000   2.22414614
  0.91900000   2.22414419
  0.91900000   2.22414237
  0.91900000   2.22414061
  0.91900000   2.22413894
  0.91910000   2.22462104
  0.91910000   2.22466559
  0.91910000   2.22462501
  0.91910000   2.22464268
  0.91910000   2.22462187
  0.91910000   2.22462768
  0.91910000   2.22461616
  0.91910000   2.22461686
  0.91910000   2.22460981
  0.91910000   2.22460841
  0.91910000   2.22460360
  0.91910000   2.22460145
  0.91910000   2.22459783
  0.91910000   2.22459549
  0.91910000   2.22459256
  0.91910000   2.22459028
  0.91910000   2.22458778
  0.91910000   2.22458564
  0.91910000   2.22458345
  0.91910000   2.22458147
  0.91910000   2.22457952
  0.91910000   2.22457770
  0.91910000   2.22457594
  0.91910000   2.22457427
  0.91920000   2.22505266
  0.91920000   2.22510161
  0.91920000   2.22505789
  0.91920000   2.22507779
  0.91920000   2.22505540
  0.91920000   2.22506233
  0.91920000   2.22505002
  0.91920000   2.22505128
  0.91920000   2.22504383
  0.91920000   2.22504272
  0.91920000   2.22503771
  0.91920000   2.22503569
  0.91920000   2.22503198
  0.91920000   2.22502971
  0.91920000   2.22502673
  0.91920000   2.22502448
  0.91920000   2.22502196
  0.91920000   2.22501983
  0.91920000   2.22501764
  0.91920000   2.22501567
  0.91920000   2.22501371
  0.91920000   2.22501189
  0.91920000   2.22501013
  0.91920000   2.22500846
  0.91930000   2.22548297
  0.91930000   2.22553663
  0.91930000   2.22548954
  0.91930000   2.22551185
  0.91930000   2.22548775
  0.91930000   2.22549589
  0.91930000   2.22548272
  0.91930000   2.22548459
  0.91930000   2.22547671
  0.91930000   2.22547590
  0.91930000   2.22547068
  0.91930000   2.22546881
  0.91930000   2.22546499
  0.91930000   2.22546279
  0.91930000   2.22545976
  0.91930000   2.22545755
  0.91930000   2.22545501
  0.91930000   2.22545290
  0.91930000   2.22545069
  0.91930000   2.22544872
  0.91930000   2.22544676
  0.91930000   2.22544495
  0.91930000   2.22544318
  0.91930000   2.22544151
  0.91940000   2.22591197
  0.91940000   2.22597066
  0.91940000   2.22591995
  0.91940000   2.22594486
  0.91940000   2.22591889
  0.91940000   2.22592837
  0.91940000   2.22591425
  0.91940000   2.22591679
  0.91940000   2.22590844
  0.91940000   2.22590796
  0.91940000   2.22590250
  0.91940000   2.22590081
  0.91940000   2.22589686
  0.91940000   2.22589475
  0.91940000   2.22589166
  0.91940000   2.22588949
  0.91940000   2.22588692
  0.91940000   2.22588483
  0.91940000   2.22588260
  0.91940000   2.22588065
  0.91940000   2.22587868
  0.91940000   2.22587688
  0.91940000   2.22587510
  0.91940000   2.22587344
  0.91950000   2.22633965
  0.91950000   2.22640371
  0.91950000   2.22634912
  0.91950000   2.22637683
  0.91950000   2.22634885
  0.91950000   2.22635978
  0.91950000   2.22634461
  0.91950000   2.22634790
  0.91950000   2.22633902
  0.91950000   2.22633892
  0.91950000   2.22633319
  0.91950000   2.22633168
  0.91950000   2.22632761
  0.91950000   2.22632559
  0.91950000   2.22632243
  0.91950000   2.22632031
  0.91950000   2.22631770
  0.91950000   2.22631564
  0.91950000   2.22631340
  0.91950000   2.22631146
  0.91950000   2.22630947
  0.91950000   2.22630768
  0.91950000   2.22630590
  0.91950000   2.22630424
  0.91960000   2.22676601
  0.91960000   2.22683580
  0.91960000   2.22677704
  0.91960000   2.22680778
  0.91960000   2.22677761
  0.91960000   2.22679011
  0.91960000   2.22677382
  0.91960000   2.22677792
  0.91960000   2.22676845
  0.91960000   2.22676877
  0.91960000   2.22676275
  0.91960000   2.22676145
  0.91960000   2.22675723
  0.91960000   2.22675532
  0.91960000   2.22675208
  0.91960000   2.22675001
  0.91960000   2.22674737
  0.91960000   2.22674533
  0.91960000   2.22674307
  0.91960000   2.22674114
  0.91960000   2.22673915
  0.91960000   2.22673736
  0.91960000   2.22673557
  0.91960000   2.22673392
  0.91970000   2.22719105
  0.91970000   2.22726694
  0.91970000   2.22720373
  0.91970000   2.22723771
  0.91970000   2.22720519
  0.91970000   2.22721939
  0.91970000   2.22720187
  0.91970000   2.22720686
  0.91970000   2.22719675
  0.91970000   2.22719753
  0.91970000   2.22719117
  0.91970000   2.22719012
  0.91970000   2.22718572
  0.91970000   2.22718393
  0.91970000   2.22718061
  0.91970000   2.22717860
  0.91970000   2.22717591
  0.91970000   2.22717391
  0.91970000   2.22717162
  0.91970000   2.22716971
  0.91970000   2.22716771
  0.91970000   2.22716592
  0.91970000   2.22716414
  0.91970000   2.22716248
  0.91980000   2.22761476
  0.91980000   2.22769714
  0.91980000   2.22762917
  0.91980000   2.22766663
  0.91980000   2.22763157
  0.91980000   2.22764763
  0.91980000   2.22762876
  0.91980000   2.22763472
  0.91980000   2.22762391
  0.91980000   2.22762520
  0.91980000   2.22761847
  0.91980000   2.22761768
  0.91980000   2.22761309
  0.91980000   2.22761144
  0.91980000   2.22760803
  0.91980000   2.22760609
  0.91980000   2.22760335
  0.91980000   2.22760138
  0.91980000   2.22759907
  0.91980000   2.22759717
  0.91980000   2.22759516
  0.91980000   2.22759338
  0.91980000   2.22759159
  0.91980000   2.22758994
  0.91990000   2.22803715
  0.91990000   2.22812641
  0.91990000   2.22805336
  0.91990000   2.22809456
  0.91990000   2.22805676
  0.91990000   2.22807482
  0.91990000   2.22805449
  0.91990000   2.22806152
  0.91990000   2.22804993
  0.91990000   2.22805179
  0.91990000   2.22804465
  0.91990000   2.22804416
  0.91990000   2.22803936
  0.91990000   2.22803786
  0.91990000   2.22803433
  0.91990000   2.22803247
  0.91990000   2.22802967
  0.91990000   2.22802774
  0.91990000   2.22802540
  0.91990000   2.22802353
  0.91990000   2.22802150
  0.91990000   2.22801974
  0.91990000   2.22801793
  0.91990000   2.22801629
  0.92000000   2.22845820
  0.92000000   2.22855477
  0.92000000   2.22847631
  0.92000000   2.22852151
  0.92000000   2.22848076
  0.92000000   2.22850099
  0.92000000   2.22847907
  0.92000000   2.22848726
  0.92000000   2.22847482
  0.92000000   2.22847730
  0.92000000   2.22846971
  0.92000000   2.22846955
  0.92000000   2.22846451
  0.92000000   2.22846318
  0.92000000   2.22845953
  0.92000000   2.22845776
  0.92000000   2.22845490
  0.92000000   2.22845301
  0.92000000   2.22845064
  0.92000000   2.22844879
  0.92000000   2.22844674
  0.92000000   2.22844499
  0.92000000   2.22844318
  0.92000000   2.22844154
  0.92010000   2.22887793
  0.92010000   2.22898222
  0.92010000   2.22889801
  0.92010000   2.22894748
  0.92010000   2.22890357
  0.92010000   2.22892614
  0.92010000   2.22890249
  0.92010000   2.22891195
  0.92010000   2.22889859
  0.92010000   2.22890174
  0.92010000   2.22889366
  0.92010000   2.22889385
  0.92010000   2.22888855
  0.92010000   2.22888742
  0.92010000   2.22888362
  0.92010000   2.22888195
  0.92010000   2.22887902
  0.92010000   2.22887719
  0.92010000   2.22887478
  0.92010000   2.22887296
  0.92010000   2.22887089
  0.92010000   2.22886915
  0.92010000   2.22886733
  0.92010000   2.22886570
  0.92020000   2.22929634
  0.92020000   2.22940877
  0.92020000   2.22931846
  0.92020000   2.22937249
  0.92020000   2.22932519
  0.92020000   2.22935027
  0.92020000   2.22932477
  0.92020000   2.22933560
  0.92020000   2.22932122
  0.92020000   2.22932512
  0.92020000   2.22931649
  0.92020000   2.22931709
  0.92020000   2.22931149
  0.92020000   2.22931057
  0.92020000   2.22930662
  0.92020000   2.22930507
  0.92020000   2.22930205
  0.92020000   2.22930028
  0.92020000   2.22929782
  0.92020000   2.22929604
  0.92020000   2.22929394
  0.92020000   2.22929222
  0.92020000   2.22929039
  0.92020000   2.22928877
  0.92030000   2.22971341
  0.92030000   2.22983444
  0.92030000   2.22973766
  0.92030000   2.22979654
  0.92030000   2.22974562
  0.92030000   2.22977340
  0.92030000   2.22974589
  0.92030000   2.22975821
  0.92030000   2.22974273
  0.92030000   2.22974745
  0.92030000   2.22973821
  0.92030000   2.22973926
  0.92030000   2.22973333
  0.92030000   2.22973266
  0.92030000   2.22972852
  0.92030000   2.22972710
  0.92030000   2.22972399
  0.92030000   2.22972229
  0.92030000   2.22971978
  0.92030000   2.22971803
  0.92030000   2.22971591
  0.92030000   2.22971421
  0.92030000   2.22971236
  0.92030000   2.22971075
  0.92040000   2.23012916
  0.92040000   2.23025923
  0.92040000   2.23015562
  0.92040000   2.23021965
  0.92040000   2.23016485
  0.92040000   2.23019554
  0.92040000   2.23016586
  0.92040000   2.23017980
  0.92040000   2.23016311
  0.92040000   2.23016873
  0.92040000   2.23015883
  0.92040000   2.23016036
  0.92040000   2.23015407
  0.92040000   2.23015367
  0.92040000   2.23014934
  0.92040000   2.23014806
  0.92040000   2.23014484
  0.92040000   2.23014322
  0.92040000   2.23014065
  0.92040000   2.23013895
  0.92040000   2.23013680
  0.92040000   2.23013512
  0.92040000   2.23013325
  0.92040000   2.23013165
  0.92050000   2.23054359
  0.92050000   2.23068315
  0.92050000   2.23057233
  0.92050000   2.23064182
  0.92050000   2.23058290
  0.92050000   2.23061670
  0.92050000   2.23058468
  0.92050000   2.23060037
  0.92050000   2.23058238
  0.92050000   2.23058897
  0.92050000   2.23057834
  0.92050000   2.23058042
  0.92050000   2.23057373
  0.92050000   2.23057362
  0.92050000   2.23056907
  0.92050000   2.23056795
  0.92050000   2.23056461
  0.92050000   2.23056308
  0.92050000   2.23056045
  0.92050000   2.23055879
  0.92050000   2.23055660
  0.92050000   2.23055495
  0.92050000   2.23055306
  0.92050000   2.23055148
  0.92060000   2.23095670
  0.92060000   2.23110620
  0.92060000   2.23098779
  0.92060000   2.23106307
  0.92060000   2.23099976
  0.92060000   2.23103687
  0.92060000   2.23100235
  0.92060000   2.23101993
  0.92060000   2.23100052
  0.92060000   2.23100817
  0.92060000   2.23099675
  0.92060000   2.23099942
  0.92060000   2.23099229
  0.92060000   2.23099251
  0.92060000   2.23098772
  0.92060000   2.23098678
  0.92060000   2.23098331
  0.92060000   2.23098187
  0.92060000   2.23097917
  0.92060000   2.23097756
  0.92060000   2.23097534
  0.92060000   2.23097372
  0.92060000   2.23097181
  0.92060000   2.23097024
  0.92070000   2.23136850
  0.92070000   2.23152840
  0.92070000   2.23140201
  0.92070000   2.23148339
  0.92070000   2.23141543
  0.92070000   2.23145609
  0.92070000   2.23141888
  0.92070000   2.23143849
  0.92070000   2.23141754
  0.92070000   2.23142635
  0.92070000   2.23141407
  0.92070000   2.23141739
  0.92070000   2.23140976
  0.92070000   2.23141035
  0.92070000   2.23140528
  0.92070000   2.23140456
  0.92070000   2.23140093
  0.92070000   2.23139961
  0.92070000   2.23139682
  0.92070000   2.23139528
  0.92070000   2.23139300
  0.92070000   2.23139142
  0.92070000   2.23138948
  0.92070000   2.23138793
  0.92080000   2.23177901
  0.92080000   2.23194975
  0.92080000   2.23181499
  0.92080000   2.23190281
  0.92080000   2.23182991
  0.92080000   2.23187434
  0.92080000   2.23183426
  0.92080000   2.23185605
  0.92080000   2.23183345
  0.92080000   2.23184351
  0.92080000   2.23183028
  0.92080000   2.23183432
  0.92080000   2.23182616
  0.92080000   2.23182715
  0.92080000   2.23182178
  0.92080000   2.23182128
  0.92080000   2.23181747
  0.92080000   2.23181629
  0.92080000   2.23181340
  0.92080000   2.23181193
  0.92080000   2.23180960
  0.92080000   2.23180805
  0.92080000   2.23180609
  0.92080000   2.23180457
  0.92090000   2.23218822
  0.92090000   2.23237024
  0.92090000   2.23222673
  0.92090000   2.23232131
  0.92090000   2.23224321
  0.92090000   2.23229164
  0.92090000   2.23224850
  0.92090000   2.23227263
  0.92090000   2.23224825
  0.92090000   2.23225966
  0.92090000   2.23224540
  0.92090000   2.23225022
  0.92090000   2.23224147
  0.92090000   2.23224290
  0.92090000   2.23223720
  0.92090000   2.23223695
  0.92090000   2.23223296
  0.92090000   2.23223191
  0.92090000   2.23222892
  0.92090000   2.23222753
  0.92090000   2.23222514
  0.92090000   2.23222364
  0.92090000   2.23222164
  0.92090000   2.23222014
  0.92100000   2.23259616
  0.92100000   2.23278988
  0.92100000   2.23263724
  0.92100000   2.23273892
  0.92100000   2.23265533
  0.92100000   2.23270799
  0.92100000   2.23266159
  0.92100000   2.23268823
  0.92100000   2.23266193
  0.92100000   2.23267481
  0.92100000   2.23265944
  0.92100000   2.23266510
  0.92100000   2.23265570
  0.92100000   2.23265763
  0.92100000   2.23265155
  0.92100000   2.23265158
  0.92100000   2.23264738
  0.92100000   2.23264649
  0.92100000   2.23264338
  0.92100000   2.23264208
  0.92100000   2.23263963
  0.92100000   2.23263818
  0.92100000   2.23263614
  0.92100000   2.23263467
  0.92110000   2.23300285
  0.92110000   2.23320866
  0.92110000   2.23304654
  0.92110000   2.23315563
  0.92110000   2.23306627
  0.92110000   2.23312341
  0.92110000   2.23307355
  0.92110000   2.23310285
  0.92110000   2.23307451
  0.92110000   2.23308896
  0.92110000   2.23307238
  0.92110000   2.23307896
  0.92110000   2.23306886
  0.92110000   2.23307133
  0.92110000   2.23306484
  0.92110000   2.23306518
  0.92110000   2.23306075
  0.92110000   2.23306004
  0.92110000   2.23305679
  0.92110000   2.23305559
  0.92110000   2.23305306
  0.92110000   2.23305167
  0.92110000   2.23304958
  0.92110000   2.23304815
  0.92120000   2.23340830
  0.92120000   2.23362658
  0.92120000   2.23345462
  0.92120000   2.23357144
  0.92120000   2.23347604
  0.92120000   2.23353789
  0.92120000   2.23348437
  0.92120000   2.23351651
  0.92120000   2.23348597
  0.92120000   2.23350212
  0.92120000   2.23348423
  0.92120000   2.23349182
  0.92120000   2.23348095
  0.92120000   2.23348400
  0.92120000   2.23347707
  0.92120000   2.23347775
  0.92120000   2.23347305
  0.92120000   2.23347254
  0.92120000   2.23346915
  0.92120000   2.23346806
  0.92120000   2.23346544
  0.92120000   2.23346412
  0.92120000   2.23346198
  0.92120000   2.23346059
  0.92130000   2.23381253
  0.92130000   2.23404363
  0.92130000   2.23386151
  0.92130000   2.23398636
  0.92130000   2.23388465
  0.92130000   2.23395144
  0.92130000   2.23389406
  0.92130000   2.23392921
  0.92130000   2.23389633
  0.92130000   2.23391429
  0.92130000   2.23389501
  0.92130000   2.23390367
  0.92130000   2.23389197
  0.92130000   2.23389566
  0.92130000   2.23388824
  0.92130000   2.23388930
  0.92130000   2.23388431
  0.92130000   2.23388402
  0.92130000   2.23388046
  0.92130000   2.23387950
  0.92130000   2.23387678
  0.92130000   2.23387553
  0.92130000   2.23387334
  0.92130000   2.23387199
  0.92140000   2.23421559
  0.92140000   2.23445980
  0.92140000   2.23426722
  0.92140000   2.23440037
  0.92140000   2.23429209
  0.92140000   2.23436406
  0.92140000   2.23430262
  0.92140000   2.23434095
  0.92140000   2.23430559
  0.92140000   2.23432548
  0.92140000   2.23430470
  0.92140000   2.23431453
  0.92140000   2.23430193
  0.92140000   2.23430631
  0.92140000   2.23429835
  0.92140000   2.23429983
  0.92140000   2.23429452
  0.92140000   2.23429448
  0.92140000   2.23429072
  0.92140000   2.23428991
  0.92140000   2.23428708
  0.92140000   2.23428592
  0.92140000   2.23428366
  0.92140000   2.23428236
  0.92150000   2.23461750
  0.92150000   2.23487507
  0.92150000   2.23467177
  0.92150000   2.23481349
  0.92150000   2.23469840
  0.92150000   2.23477576
  0.92150000   2.23471006
  0.92150000   2.23475174
  0.92150000   2.23471376
  0.92150000   2.23473570
  0.92150000   2.23471331
  0.92150000   2.23472439
  0.92150000   2.23471082
  0.92150000   2.23471596
  0.92150000   2.23470742
  0.92150000   2.23470934
  0.92150000   2.23470369
  0.92150000   2.23470392
  0.92150000   2.23469995
  0.92150000   2.23469930
  0.92150000   2.23469635
  0.92150000   2.23469528
  0.92150000   2.23469295
  0.92150000   2.23469170
  0.92160000   2.23501831
  0.92160000   2.23528941
  0.92160000   2.23507518
  0.92160000   2.23522569
  0.92160000   2.23510357
  0.92160000   2.23518653
  0.92160000   2.23511639
  0.92160000   2.23516159
  0.92160000   2.23512083
  0.92160000   2.23514495
  0.92160000   2.23512085
  0.92160000   2.23513327
  0.92160000   2.23511866
  0.92160000   2.23512461
  0.92160000   2.23511543
  0.92160000   2.23511785
  0.92160000   2.23511182
  0.92160000   2.23511234
  0.92160000   2.23510814
  0.92160000   2.23510767
  0.92160000   2.23510458
  0.92160000   2.23510362
  0.92160000   2.23510121
  0.92160000   2.23510002
  0.92170000   2.23541806
  0.92170000   2.23570281
  0.92170000   2.23547747
  0.92170000   2.23563696
  0.92170000   2.23550762
  0.92170000   2.23559637
  0.92170000   2.23552162
  0.92170000   2.23557048
  0.92170000   2.23552681
  0.92170000   2.23555324
  0.92170000   2.23552732
  0.92170000   2.23554117
  0.92170000   2.23552544
  0.92170000   2.23553227
  0.92170000   2.23552240
  0.92170000   2.23552536
  0.92170000   2.23551890
  0.92170000   2.23551975
  0.92170000   2.23551531
  0.92170000   2.23551503
  0.92170000   2.23551179
  0.92170000   2.23551094
  0.92170000   2.23550844
  0.92170000   2.23550732
  0.92180000   2.23581679
  0.92180000   2.23611523
  0.92180000   2.23587868
  0.92180000   2.23604730
  0.92180000   2.23591057
  0.92180000   2.23600528
  0.92180000   2.23592574
  0.92180000   2.23597843
  0.92180000   2.23593172
  0.92180000   2.23596057
  0.92180000   2.23593273
  0.92180000   2.23594810
  0.92180000   2.23593116
  0.92180000   2.23593894
  0.92180000   2.23592833
  0.92180000   2.23593187
  0.92180000   2.23592496
  0.92180000   2.23592617
  0.92180000   2.23592144
  0.92180000   2.23592138
  0.92180000   2.23591797
  0.92180000   2.23591726
  0.92180000   2.23591465
  0.92180000   2.23591361
  0.92190000   2.23621458
  0.92190000   2.23652663
  0.92190000   2.23627885
  0.92190000   2.23645668
  0.92190000   2.23631245
  0.92190000   2.23641324
  0.92190000   2.23632879
  0.92190000   2.23638544
  0.92190000   2.23633555
  0.92190000   2.23636693
  0.92190000   2.23633708
  0.92190000   2.23635405
  0.92190000   2.23633584
  0.92190000   2.23634463
  0.92190000   2.23633322
  0.92190000   2.23633739
  0.92190000   2.23632999
  0.92190000   2.23633158
  0.92190000   2.23632655
  0.92190000   2.23632673
  0.92190000   2.23632313
  0.92190000   2.23632256
  0.92190000   2.23631985
  0.92190000   2.23631890
  0.92200000   2.23661150
  0.92200000   2.23693697
  0.92200000   2.23667802
  0.92200000   2.23686508
  0.92200000   2.23671327
  0.92200000   2.23682025
  0.92200000   2.23673078
  0.92200000   2.23679149
  0.92200000   2.23673832
  0.92200000   2.23677234
  0.92200000   2.23674038
  0.92200000   2.23675904
  0.92200000   2.23673948
  0.92200000   2.23674934
  0.92200000   2.23673708
  0.92200000   2.23674193
  0.92200000   2.23673399
  0.92200000   2.23673600
  0.92200000   2.23673064
  0.92200000   2.23673108
  0.92200000   2.23672728
  0.92200000   2.23672687
  0.92200000   2.23672403
  0.92200000   2.23672318
  0.92210000   2.23700761
  0.92210000   2.23734619
  0.92210000   2.23707623
  0.92210000   2.23727247
  0.92210000   2.23711307
  0.92210000   2.23722629
  0.92210000   2.23713171
  0.92210000   2.23719658
  0.92210000   2.23714005
  0.92210000   2.23717679
  0.92210000   2.23714263
  0.92210000   2.23716305
  0.92210000   2.23714209
  0.92210000   2.23715307
  0.92210000   2.23713992
  0.92210000   2.23714548
  0.92210000   2.23713697
  0.92210000   2.23713944
  0.92210000   2.23713371
  0.92210000   2.23713444
  0.92210000   2.23713041
  0.92210000   2.23713018
  0.92210000   2.23712720
  0.92210000   2.23712646
  0.92220000   2.23740300
  0.92220000   2.23775424
  0.92220000   2.23747354
  0.92220000   2.23767881
  0.92220000   2.23751188
  0.92220000   2.23763135
  0.92220000   2.23753163
  0.92220000   2.23760071
  0.92220000   2.23754073
  0.92220000   2.23758027
  0.92220000   2.23754385
  0.92220000   2.23756610
  0.92220000   2.23754366
  0.92220000   2.23755584
  0.92220000   2.23754173
  0.92220000   2.23754805
  0.92220000   2.23753893
  0.92220000   2.23754188
  0.92220000   2.23753578
  0.92220000   2.23753681
  0.92220000   2.23753254
  0.92220000   2.23753250
  0.92220000   2.23752936
  0.92220000   2.23752875
  0.92230000   2.23779778
  0.92230000   2.23816104
  0.92230000   2.23787002
  0.92230000   2.23808406
  0.92230000   2.23790974
  0.92230000   2.23803539
  0.92230000   2.23793054
  0.92230000   2.23800386
  0.92230000   2.23794040
  0.92230000   2.23798279
  0.92230000   2.23794405
  0.92230000   2.23796819
  0.92230000   2.23794422
  0.92230000   2.23795763
  0.92230000   2.23794252
  0.92230000   2.23794965
  0.92230000   2.23793988
  0.92230000   2.23794335
  0.92230000   2.23793683
  0.92230000   2.23793820
  0.92230000   2.23793366
  0.92230000   2.23793383
  0.92230000   2.23793053
  0.92230000   2.23793004
  0.92240000   2.23819206
  0.92240000   2.23856651
  0.92240000   2.23826573
  0.92240000   2.23848818
  0.92240000   2.23830671
  0.92240000   2.23843839
  0.92240000   2.23832848
  0.92240000   2.23840601
  0.92240000   2.23833908
  0.92240000   2.23838433
  0.92240000   2.23834323
  0.92240000   2.23836930
  0.92240000   2.23834376
  0.92240000   2.23835845
  0.92240000   2.23834230
  0.92240000   2.23835027
  0.92240000   2.23833983
  0.92240000   2.23834384
  0.92240000   2.23833688
  0.92240000   2.23833860
  0.92240000   2.23833378
  0.92240000   2.23833418
  0.92240000   2.23833070
  0.92240000   2.23833036
  0.92250000   2.23858595
  0.92250000   2.23897056
  0.92250000   2.23866077
  0.92250000   2.23889109
  0.92250000   2.23870283
  0.92250000   2.23884031
  0.92250000   2.23872550
  0.92250000   2.23880715
  0.92250000   2.23873677
  0.92250000   2.23878489
  0.92250000   2.23874142
  0.92250000   2.23876944
  0.92250000   2.23874230
  0.92250000   2.23875830
  0.92250000   2.23874108
  0.92250000   2.23874992
  0.92250000   2.23873877
  0.92250000   2.23874336
  0.92250000   2.23873594
  0.92250000   2.23873803
  0.92250000   2.23873291
  0.92250000   2.23873355
  0.92250000   2.23872987
  0.92250000   2.23872969
  0.92260000   2.23897959
  0.92260000   2.23937309
  0.92260000   2.23905521
  0.92260000   2.23929274
  0.92260000   2.23909817
  0.92260000   2.23924111
  0.92260000   2.23912162
  0.92260000   2.23920725
  0.92260000   2.23913351
  0.92260000   2.23918445
  0.92260000   2.23913863
  0.92260000   2.23916860
  0.92260000   2.23913985
  0.92260000   2.23915718
  0.92260000   2.23913887
  0.92260000   2.23914860
  0.92260000   2.23913672
  0.92260000   2.23914191
  0.92260000   2.23913400
  0.92260000   2.23913648
  0.92260000   2.23913105
  0.92260000   2.23913195
  0.92260000   2.23912806
  0.92260000   2.23912804
  0.92270000   2.23937314
  0.92270000   2.23977398
  0.92270000   2.23944917
  0.92270000   2.23969305
  0.92270000   2.23949279
  0.92270000   2.23964075
  0.92270000   2.23951690
  0.92270000   2.23960628
  0.92270000   2.23952934
  0.92270000   2.23958299
  0.92270000   2.23953489
  0.92270000   2.23956677
  0.92270000   2.23953643
  0.92270000   2.23955508
  0.92270000   2.23953568
  0.92270000   2.23954631
  0.92270000   2.23953369
  0.92270000   2.23953948
  0.92270000   2.23953108
  0.92270000   2.23953397
  0.92270000   2.23952820
  0.92270000   2.23952937
  0.92270000   2.23952526
  0.92270000   2.23952543
  0.92280000   2.23976676
  0.92280000   2.24017309
  0.92280000   2.23984277
  0.92280000   2.24009192
  0.92280000   2.23988679
  0.92280000   2.24003915
  0.92280000   2.23991139
  0.92280000   2.24000420
  0.92280000   2.23992429
  0.92280000   2.23998049
  0.92280000   2.23993022
  0.92280000   2.23996394
  0.92280000   2.23993205
  0.92280000   2.23995199
  0.92280000   2.23993152
  0.92280000   2.23994305
  0.92280000   2.23992968
  0.92280000   2.23993609
  0.92280000   2.23992718
  0.92280000   2.23993049
  0.92280000   2.23992437
  0.92280000   2.23992582
  0.92280000   2.23992149
  0.92280000   2.23992184
  0.92290000   2.24016065
  0.92290000   2.24057028
  0.92290000   2.24023614
  0.92290000   2.24048926
  0.92290000   2.24028024
  0.92290000   2.24043626
  0.92290000   2.24030515
  0.92290000   2.24040097
  0.92290000   2.24031841
  0.92290000   2.24037693
  0.92290000   2.24032465
  0.92290000   2.24036009
  0.92290000   2.24032673
  0.92290000   2.24034792
  0.92290000   2.24032639
  0.92290000   2.24033880
  0.92290000   2.24032471
  0.92290000   2.24033172
  0.92290000   2.24032231
  0.92290000   2.24032603
  0.92290000   2.24031958
  0.92290000   2.24032131
  0.92290000   2.24031674
  0.92290000   2.24031728
  0.92300000   2.24055500
  0.92300000   2.24096538
  0.92300000   2.24062941
  0.92300000   2.24088496
  0.92300000   2.24067326
  0.92300000   2.24083200
  0.92300000   2.24069827
  0.92300000   2.24079653
  0.92300000   2.24071174
  0.92300000   2.24077226
  0.92300000   2.24071822
  0.92300000   2.24075520
  0.92300000   2.24072050
  0.92300000   2.24074284
  0.92300000   2.24072034
  0.92300000   2.24073358
  0.92300000   2.24071878
  0.92300000   2.24072639
  0.92300000   2.24071647
  0.92300000   2.24072061
  0.92300000   2.24071381
  0.92300000   2.24071583
  0.92300000   2.24071103
  0.92300000   2.24071176
  0.92310000   2.24095004
  0.92310000   2.24135821
  0.92310000   2.24102277
  0.92310000   2.24127887
  0.92310000   2.24106596
  0.92310000   2.24122628
  0.92310000   2.24109081
  0.92310000   2.24119083
  0.92310000   2.24110434
  0.92310000   2.24116645
  0.92310000   2.24111096
  0.92310000   2.24114924
  0.92310000   2.24111340
  0.92310000   2.24113674
  0.92310000   2.24111336
  0.92310000   2.24112735
  0.92310000   2.24111191
  0.92310000   2.24112007
  0.92310000   2.24110969
  0.92310000   2.24111423
  0.92310000   2.24110709
  0.92310000   2.24110939
  0.92310000   2.24110435
  0.92310000   2.24110528
  0.92320000   2.24134602
  0.92320000   2.24174855
  0.92320000   2.24141638
  0.92320000   2.24167085
  0.92320000   2.24145847
  0.92320000   2.24161898
  0.92320000   2.24148287
  0.92320000   2.24158380
  0.92320000   2.24149628
  0.92320000   2.24155945
  0.92320000   2.24150292
  0.92320000   2.24154219
  0.92320000   2.24150544
  0.92320000   2.24152960
  0.92320000   2.24150549
  0.92320000   2.24152013
  0.92320000   2.24150413
  0.92320000   2.24151277
  0.92320000   2.24150197
  0.92320000   2.24150686
  0.92320000   2.24149943
  0.92320000   2.24150198
  0.92320000   2.24149673
  0.92320000   2.24149784
  0.92330000   2.24174321
  0.92330000   2.24213620
  0.92330000   2.24181046
  0.92330000   2.24206075
  0.92330000   2.24185094
  0.92330000   2.24201000
  0.92330000   2.24187457
  0.92330000   2.24197534
  0.92330000   2.24188764
  0.92330000   2.24195121
  0.92330000   2.24189416
  0.92330000   2.24193400
  0.92330000   2.24189667
  0.92330000   2.24192139
  0.92330000   2.24189676
  0.92330000   2.24191188
  0.92330000   2.24189544
  0.92330000   2.24190447
  0.92330000   2.24189333
  0.92330000   2.24189852
  0.92330000   2.24189083
  0.92330000   2.24189361
  0.92330000   2.24188816
  0.92330000   2.24188944
  0.92340000   2.24214191
  0.92340000   2.24252088
  0.92340000   2.24220522
  0.92340000   2.24244836
  0.92340000   2.24224355
  0.92340000   2.24239920
  0.92340000   2.24226602
  0.92340000   2.24236537
  0.92340000   2.24227850
  0.92340000   2.24234165
  0.92340000   2.24228475
  0.92340000   2.24232463
  0.92340000   2.24228713
  0.92340000   2.24231209
  0.92340000   2.24228719
  0.92340000   2.24230259
  0.92340000   2.24228587
  0.92340000   2.24229517
  0.92340000   2.24228378
  0.92340000   2.24228920
  0.92340000   2.24228130
  0.92340000   2.24228426
  0.92340000   2.24227866
  0.92340000   2.24228007
  0.92350000   2.24254244
  0.92350000   2.24290234
  0.92350000   2.24260092
  0.92350000   2.24283349
  0.92350000   2.24263646
  0.92350000   2.24278643
  0.92350000   2.24265736
  0.92350000   2.24275378
  0.92350000   2.24266897
  0.92350000   2.24273070
  0.92350000   2.24267474
  0.92350000   2.24271402
  0.92350000   2.24267689
  0.92350000   2.24270166
  0.92350000   2.24267683
  0.92350000   2.24269224
  0.92350000   2.24267546
  0.92350000   2.24268485
  0.92350000   2.24267335
  0.92350000   2.24267888
  0.92350000   2.24267087
  0.92350000   2.24267394
  0.92350000   2.24266823
  0.92350000   2.24266974
  0.92360000   2.24294516
  0.92360000   2.24328026
  0.92360000   2.24299782
  0.92360000   2.24321590
  0.92360000   2.24302990
  0.92360000   2.24317152
  0.92360000   2.24304875
  0.92360000   2.24314044
  0.92360000   2.24305916
  0.92360000   2.24311827
  0.92360000   2.24306424
  0.92360000   2.24310212
  0.92360000   2.24306599
  0.92360000   2.24309005
  0.92360000   2.24306571
  0.92360000   2.24308079
  0.92360000   2.24306423
  0.92360000   2.24307348
  0.92360000   2.24306206
  0.92360000   2.24306756
  0.92360000   2.24305955
  0.92360000   2.24306264
  0.92360000   2.24305690
  0.92360000   2.24305845
  0.92370000   2.24335046
  0.92370000   2.24365431
  0.92370000   2.24339624
  0.92370000   2.24359535
  0.92370000   2.24342409
  0.92370000   2.24355427
  0.92370000   2.24344036
  0.92370000   2.24352520
  0.92370000   2.24344920
  0.92370000   2.24350425
  0.92370000   2.24345333
  0.92370000   2.24348883
  0.92370000   2.24345452
  0.92370000   2.24347720
  0.92370000   2.24345390
  0.92370000   2.24346820
  0.92370000   2.24345222
  0.92370000   2.24346105
  0.92370000   2.24344994
  0.92370000   2.24345521
  0.92370000   2.24344737
  0.92370000   2.24345034
  0.92370000   2.24344468
  0.92370000   2.24344617
  0.92380000   2.24375874
  0.92380000   2.24402413
  0.92380000   2.24379648
  0.92380000   2.24397154
  0.92380000   2.24381928
  0.92380000   2.24393446
  0.92380000   2.24383238
  0.92380000   2.24390791
  0.92380000   2.24383924
  0.92380000   2.24388853
  0.92380000   2.24384213
  0.92380000   2.24387409
  0.92380000   2.24384255
  0.92380000   2.24386306
  0.92380000   2.24384146
  0.92380000   2.24385444
  0.92380000   2.24383948
  0.92380000   2.24384751
  0.92380000   2.24383703
  0.92380000   2.24384182
  0.92380000   2.24383434
  0.92380000   2.24383703
  0.92380000   2.24383159
  0.92380000   2.24383292
  0.92390000   2.24417047
  0.92390000   2.24438932
  0.92390000   2.24419893
  0.92390000   2.24434416
  0.92390000   2.24421576
  0.92390000   2.24431187
  0.92390000   2.24422503
  0.92390000   2.24428838
  0.92390000   2.24422944
  0.92390000   2.24427097
  0.92390000   2.24423076
  0.92390000   2.24425778
  0.92390000   2.24423018
  0.92390000   2.24424756
  0.92390000   2.24422845
  0.92390000   2.24423944
  0.92390000   2.24422606
  0.92390000   2.24423284
  0.92390000   2.24422335
  0.92390000   2.24422736
  0.92390000   2.24422050
  0.92390000   2.24422270
  0.92390000   2.24421765
  0.92390000   2.24421867
  0.92400000   2.24458613
  0.92400000   2.24474944
  0.92400000   2.24460397
  0.92400000   2.24471288
  0.92400000   2.24461385
  0.92400000   2.24468621
  0.92400000   2.24461857
  0.92400000   2.24466640
  0.92400000   2.24461999
  0.92400000   2.24465140
  0.92400000   2.24461937
  0.92400000   2.24463979
  0.92400000   2.24461751
  0.92400000   2.24463059
  0.92400000   2.24461495
  0.92400000   2.24462315
  0.92400000   2.24461203
  0.92400000   2.24461699
  0.92400000   2.24460896
  0.92400000   2.24461179
  0.92400000   2.24460589
  0.92400000   2.24460731
  0.92400000   2.24460288
  0.92400000   2.24460340
  0.92410000   2.24500625
  0.92410000   2.24510402
  0.92410000   2.24501204
  0.92410000   2.24507730
  0.92410000   2.24501388
  0.92410000   2.24505719
  0.92410000   2.24501325
  0.92410000   2.24504175
  0.92410000   2.24501112
  0.92410000   2.24502966
  0.92410000   2.24500812
  0.92410000   2.24501998
  0.92410000   2.24500468
  0.92410000   2.24501207
  0.92410000   2.24500107
  0.92410000   2.24500549
  0.92410000   2.24499745
  0.92410000   2.24499990
  0.92410000   2.24499392
  0.92410000   2.24499507
  0.92410000   2.24499054
  0.92410000   2.24499085
  0.92410000   2.24498733
  0.92410000   2.24498711
  0.92420000   2.24543140
  0.92420000   2.24545255
  0.92420000   2.24542360
  0.92420000   2.24543701
  0.92420000   2.24541625
  0.92420000   2.24542447
  0.92420000   2.24540939
  0.92420000   2.24541415
  0.92420000   2.24540304
  0.92420000   2.24540553
  0.92420000   2.24539720
  0.92420000   2.24539819
  0.92420000   2.24539183
  0.92420000   2.24539187
  0.92420000   2.24538692
  0.92420000   2.24538636
  0.92420000   2.24538242
  0.92420000   2.24538150
  0.92420000   2.24537829
  0.92420000   2.24537716
  0.92420000   2.24537450
  0.92420000   2.24537328
  0.92420000   2.24537102
  0.92420000   2.24536976
  0.92430000   2.24586220
  0.92430000   2.24579447
  0.92430000   2.24583917
  0.92430000   2.24579156
  0.92430000   2.24582136
  0.92430000   2.24578768
  0.92430000   2.24580732
  0.92430000   2.24578332
  0.92430000   2.24579604
  0.92430000   2.24577878
  0.92430000   2.24578681
  0.92430000   2.24577425
  0.92430000   2.24577913
  0.92430000   2.24576986
  0.92430000   2.24577262
  0.92430000   2.24576567
  0.92430000   2.24576702
  0.92430000   2.24576171
  0.92430000   2.24576214
  0.92430000   2.24575801
  0.92430000   2.24575783
  0.92430000   2.24575454
  0.92430000   2.24575400
  0.92430000   2.24575132
  0.92440000   2.24629930
  0.92440000   2.24612918
  0.92440000   2.24625930
  0.92440000   2.24614044
  0.92440000   2.24622967
  0.92440000   2.24614643
  0.92440000   2.24620741
  0.92440000   2.24614893
  0.92440000   2.24619041
  0.92440000   2.24614916
  0.92440000   2.24617720
  0.92440000   2.24614796
  0.92440000   2.24616675
  0.92440000   2.24614588
  0.92440000   2.24615831
  0.92440000   2.24614329
  0.92440000   2.24615137
  0.92440000   2.24614046
  0.92440000   2.24614556
  0.92440000   2.24613753
  0.92440000   2.24614061
  0.92440000   2.24613460
  0.92440000   2.24613632
  0.92440000   2.24613176
  0.92450000   2.24674342
  0.92450000   2.24645602
  0.92450000   2.24668459
  0.92450000   2.24648311
  0.92450000   2.24664169
  0.92450000   2.24650025
  0.92450000   2.24661008
  0.92450000   2.24651061
  0.92450000   2.24658649
  0.92450000   2.24651638
  0.92450000   2.24656864
  0.92450000   2.24651907
  0.92450000   2.24655491
  0.92450000   2.24651974
  0.92450000   2.24654417
  0.92450000   2.24651909
  0.92450000   2.24653561
  0.92450000   2.24651761
  0.92450000   2.24652866
  0.92450000   2.24651564
  0.92450000   2.24652290
  0.92450000   2.24651339
  0.92450000   2.24651805
  0.92450000   2.24651102
  0.92460000   2.24719530
  0.92460000   2.24677431
  0.92460000   2.24711569
  0.92460000   2.24681897
  0.92460000   2.24705797
  0.92460000   2.24684865
  0.92460000   2.24701578
  0.92460000   2.24686795
  0.92460000   2.24698465
  0.92460000   2.24688010
  0.92460000   2.24696142
  0.92460000   2.24688733
  0.92460000   2.24694386
  0.92460000   2.24689123
  0.92460000   2.24693039
  0.92460000   2.24689289
  0.92460000   2.24691989
  0.92460000   2.24689305
  0.92460000   2.24691155
  0.92460000   2.24689225
  0.92460000   2.24690481
  0.92460000   2.24689083
  0.92460000   2.24689926
  0.92460000   2.24688905
  0.92470000   2.24765575
  0.92470000   2.24708327
  0.92470000   2.24755332
  0.92470000   2.24714738
  0.92470000   2.24747911
  0.92470000   2.24719110
  0.92470000   2.24742502
  0.92470000   2.24722052
  0.92470000   2.24738530
  0.92470000   2.24723995
  0.92470000   2.24735589
  0.92470000   2.24725245
  0.92470000   2.24733387
  0.92470000   2.24726013
  0.92470000   2.24731719
  0.92470000   2.24726451
  0.92470000   2.24730438
  0.92470000   2.24726663
  0.92470000   2.24729438
  0.92470000   2.24726724
  0.92470000   2.24728645
  0.92470000   2.24726684
  0.92470000   2.24728003
  0.92470000   2.24726579
  0.92480000   2.24812563
  0.92480000   2.24738211
  0.92480000   2.24799821
  0.92480000   2.24746764
  0.92480000   2.24790575
  0.92480000   2.24752698
  0.92480000   2.24783834
  0.92480000   2.24756779
  0.92480000   2.24778891
  0.92480000   2.24759553
  0.92480000   2.24775242
  0.92480000   2.24761407
  0.92480000   2.24772525
  0.92480000   2.24762615
  0.92480000   2.24770482
  0.92480000   2.24763373
  0.92480000   2.24768929
  0.92480000   2.24763818
  0.92480000   2.24767730
  0.92480000   2.24764048
  0.92480000   2.24766793
  0.92480000   2.24764130
  0.92480000   2.24766047
  0.92480000   2.24764114
  0.92490000   2.24860586
  0.92490000   2.24766995
  0.92490000   2.24845119
  0.92490000   2.24777898
  0.92490000   2.24833860
  0.92490000   2.24785565
  0.92490000   2.24825635
  0.92490000   2.24790923
  0.92490000   2.24819598
  0.92490000   2.24794637
  0.92490000   2.24815144
  0.92490000   2.24797182
  0.92490000   2.24811835
  0.92490000   2.24798899
  0.92490000   2.24809357
  0.92490000   2.24800030
  0.92490000   2.24807484
  0.92490000   2.24800749
  0.92490000   2.24806051
  0.92490000   2.24801179
  0.92490000   2.24804942
  0.92490000   2.24801409
  0.92490000   2.24804070
  0.92490000   2.24801501
  0.92500000   2.24909740
  0.92500000   2.24794585
  0.92500000   2.24891313
  0.92500000   2.24808059
  0.92500000   2.24877844
  0.92500000   2.24817640
  0.92500000   2.24867971
  0.92500000   2.24824423
  0.92500000   2.24860708
  0.92500000   2.24829196
  0.92500000   2.24855342
  0.92500000   2.24832529
  0.92500000   2.24851356
  0.92500000   2.24834829
  0.92500000   2.24848376
  0.92500000   2.24836393
  0.92500000   2.24846130
  0.92500000   2.24837433
  0.92500000   2.24844422
  0.92500000   2.24838101
  0.92500000   2.24843108
  0.92500000   2.24838506
  0.92500000   2.24842086
  0.92500000   2.24838727
  0.92510000   2.24960129
  0.92510000   2.24820883
  0.92510000   2.24938496
  0.92510000   2.24837156
  0.92510000   2.24922609
  0.92510000   2.24848845
  0.92510000   2.24910916
  0.92510000   2.24857212
  0.92510000   2.24902284
  0.92510000   2.24863174
  0.92510000   2.24895890
  0.92510000   2.24867398
  0.92510000   2.24891133
  0.92510000   2.24870366
  0.92510000   2.24887576
  0.92510000   2.24872430
  0.92510000   2.24884898
  0.92510000   2.24873843
  0.92510000   2.24882867
  0.92510000   2.24874790
  0.92510000   2.24881313
  0.92510000   2.24875404
  0.92510000   2.24880111
  0.92510000   2.24875780
  0.92520000   2.25011862
  0.92520000   2.24845782
  0.92520000   2.24986769
  0.92520000   2.24865096
  0.92520000   2.24968246
  0.92520000   2.24879095
  0.92520000   2.24954547
  0.92520000   2.24889216
  0.92520000   2.24944393
  0.92520000   2.24896507
  0.92520000   2.24936845
  0.92520000   2.24901736
  0.92520000   2.24931215
  0.92520000   2.24905465
  0.92520000   2.24926998
  0.92520000   2.24908103
  0.92520000   2.24923822
  0.92520000   2.24909949
  0.92520000   2.24921416
  0.92520000   2.24911222
  0.92520000   2.24919578
  0.92520000   2.24912081
  0.92520000   2.24918164
  0.92520000   2.24912642
  0.92530000   2.25065052
  0.92530000   2.24869170
  0.92530000   2.25036238
  0.92530000   2.24891775
  0.92530000   2.25014850
  0.92530000   2.24908299
  0.92530000   2.24998951
  0.92530000   2.24920354
  0.92530000   2.24987111
  0.92530000   2.24929125
  0.92530000   2.24978273
  0.92530000   2.24935484
  0.92530000   2.24971658
  0.92530000   2.24940075
  0.92530000   2.24966689
  0.92530000   2.24943369
  0.92530000   2.24962942
  0.92530000   2.24945715
  0.92530000   2.24960100
  0.92530000   2.24947367
  0.92530000   2.24957933
  0.92530000   2.24948514
  0.92530000   2.24956267
  0.92530000   2.24949294
  0.92540000   2.25119821
  0.92540000   2.24890926
  0.92540000   2.25087016
  0.92540000   2.24917082
  0.92540000   2.25062526
  0.92540000   2.24936357
  0.92540000   2.25044221
  0.92540000   2.24950539
  0.92540000   2.25030520
  0.92540000   2.24960952
  0.92540000   2.25020246
  0.92540000   2.24968576
  0.92540000   2.25012524
  0.92540000   2.24974140
  0.92540000   2.25006704
  0.92540000   2.24978181
  0.92540000   2.25002302
  0.92540000   2.24981101
  0.92540000   2.24998959
  0.92540000   2.24983192
  0.92540000   2.24996407
  0.92540000   2.24984676
  0.92540000   2.24994448
  0.92540000   2.24985713
  0.92550000   2.25176295
  0.92550000   2.24910923
  0.92550000   2.25139225
  0.92550000   2.24940900
  0.92550000   2.25111385
  0.92550000   2.24963162
  0.92550000   2.25090459
  0.92550000   2.24979675
  0.92550000   2.25074711
  0.92550000   2.24991902
  0.92550000   2.25062843
  0.92550000   2.25000937
  0.92550000   2.25053881
  0.92550000   2.25007595
  0.92550000   2.25047100
  0.92550000   2.25012485
  0.92550000   2.25041953
  0.92550000   2.25016060
  0.92550000   2.25038034
  0.92550000   2.25018659
  0.92550000   2.25035038
  0.92550000   2.25020533
  0.92550000   2.25032735
  0.92550000   2.25021871
  0.92560000   2.25234607
  0.92560000   2.24929026
  0.92560000   2.25192991
  0.92560000   2.24963101
  0.92560000   2.25161548
  0.92560000   2.24988598
  0.92560000   2.25137775
  0.92560000   2.25007655
  0.92560000   2.25119783
  0.92560000   2.25021882
  0.92560000   2.25106152
  0.92560000   2.25032484
  0.92560000   2.25095808
  0.92560000   2.25040369
  0.92560000   2.25087944
  0.92560000   2.25046218
  0.92560000   2.25081953
  0.92560000   2.25050540
  0.92560000   2.25077375
  0.92560000   2.25053721
  0.92560000   2.25073866
  0.92560000   2.25056048
  0.92560000   2.25071165
  0.92560000   2.25057738
  0.92570000   2.25294895
  0.92570000   2.24945094
  0.92570000   2.25248449
  0.92570000   2.24983553
  0.92570000   2.25213141
  0.92570000   2.25012538
  0.92570000   2.25186285
  0.92570000   2.25034367
  0.92570000   2.25165844
  0.92570000   2.25050790
  0.92570000   2.25150269
  0.92570000   2.25063129
  0.92570000   2.25138389
  0.92570000   2.25072384
  0.92570000   2.25129312
  0.92570000   2.25079311
  0.92570000   2.25122366
  0.92570000   2.25084482
  0.92570000   2.25117038
  0.92570000   2.25088329
  0.92570000   2.25112940
  0.92570000   2.25091178
  0.92570000   2.25109777
  0.92570000   2.25093277
  0.92580000   2.25357304
  0.92580000   2.24958976
  0.92580000   2.25305743
  0.92580000   2.25002109
  0.92580000   2.25266301
  0.92580000   2.25034850
  0.92580000   2.25236119
  0.92580000   2.25059687
  0.92580000   2.25213009
  0.92580000   2.25078514
  0.92580000   2.25195300
  0.92580000   2.25092769
  0.92580000   2.25181718
  0.92580000   2.25103549
  0.92580000   2.25171287
  0.92580000   2.25111687
  0.92580000   2.25163266
  0.92580000   2.25117818
  0.92580000   2.25157086
  0.92580000   2.25122424
  0.92580000   2.25152313
  0.92580000   2.25125873
  0.92580000   2.25148618
  0.92580000   2.25128445
  0.92590000   2.25421984
  0.92590000   2.24970515
  0.92590000   2.25365020
  0.92590000   2.25018620
  0.92590000   2.25321173
  0.92590000   2.25055389
  0.92590000   2.25287412
  0.92590000   2.25083481
  0.92590000   2.25261406
  0.92590000   2.25104931
  0.92590000   2.25241362
  0.92590000   2.25121295
  0.92590000   2.25225900
  0.92590000   2.25133766
  0.92590000   2.25213962
  0.92590000   2.25143258
  0.92590000   2.25204734
  0.92590000   2.25150471
  0.92590000   2.25197590
  0.92590000   2.25155940
  0.92590000   2.25192049
  0.92590000   2.25160076
  0.92590000   2.25187743
  0.92590000   2.25163193
  0.92600000   2.25489088
  0.92600000   2.24979547
  0.92600000   2.25426438
  0.92600000   2.25032923
  0.92600000   2.25377910
  0.92600000   2.25074000
  0.92600000   2.25340312
  0.92600000   2.25105604
  0.92600000   2.25311173
  0.92600000   2.25129907
  0.92600000   2.25288579
  0.92600000   2.25148584
  0.92600000   2.25271050
  0.92600000   2.25162926
  0.92600000   2.25257440
  0.92600000   2.25173927
  0.92600000   2.25246863
  0.92600000   2.25182354
  0.92600000   2.25238632
  0.92600000   2.25188800
  0.92600000   2.25232219
  0.92600000   2.25193719
  0.92600000   2.25227212
  0.92600000   2.25197464
  0.92610000   2.25558779
  0.92610000   2.24985898
  0.92610000   2.25490161
  0.92610000   2.25044847
  0.92610000   2.25436674
  0.92610000   2.25090520
  0.92610000   2.25394974
  0.92610000   2.25125900
  0.92610000   2.25362457
  0.92610000   2.25153298
  0.92610000   2.25337092
  0.92610000   2.25174504
  0.92610000   2.25317296
  0.92610000   2.25190907
  0.92610000   2.25301837
  0.92610000   2.25203584
  0.92610000   2.25289755
  0.92610000   2.25213372
  0.92610000   2.25280304
  0.92610000   2.25220919
  0.92610000   2.25272903
  0.92610000   2.25226729
  0.92610000   2.25267098
  0.92610000   2.25231193
  0.92620000   2.25631219
  0.92620000   2.24989389
  0.92620000   2.25556359
  0.92620000   2.25054213
  0.92620000   2.25497636
  0.92620000   2.25104772
  0.92620000   2.25451566
  0.92620000   2.25144201
  0.92620000   2.25415418
  0.92620000   2.25174945
  0.92620000   2.25387048
  0.92620000   2.25198907
  0.92620000   2.25364774
  0.92620000   2.25217575
  0.92620000   2.25347278
  0.92620000   2.25232109
  0.92620000   2.25333526
  0.92620000   2.25243414
  0.92620000   2.25322709
  0.92620000   2.25252200
  0.92620000   2.25314193
  0.92620000   2.25259019
  0.92620000   2.25307481
  0.92620000   2.25264302
  0.92630000   2.25706578
  0.92630000   2.24989832
  0.92630000   2.25625210
  0.92630000   2.25060831
  0.92630000   2.25560976
  0.92630000   2.25116569
  0.92630000   2.25510266
  0.92630000   2.25160328
  0.92630000   2.25470228
  0.92630000   2.25194678
  0.92630000   2.25438612
  0.92630000   2.25221635
  0.92630000   2.25413638
  0.92630000   2.25242783
  0.92630000   2.25393904
  0.92630000   2.25259365
  0.92630000   2.25378304
  0.92630000   2.25272359
  0.92630000   2.25365963
  0.92630000   2.25282532
  0.92630000   2.25356194
  0.92630000   2.25290490
  0.92630000   2.25348453
  0.92630000   2.25296707
  0.92640000   2.25785027
  0.92640000   2.24987033
  0.92640000   2.25696896
  0.92640000   2.25064503
  0.92640000   2.25626882
  0.92640000   2.25125716
  0.92640000   2.25571261
  0.92640000   2.25174088
  0.92640000   2.25527070
  0.92640000   2.25212312
  0.92640000   2.25491958
  0.92640000   2.25242513
  0.92640000   2.25464053
  0.92640000   2.25266368
  0.92640000   2.25441871
  0.92640000   2.25285204
  0.92640000   2.25424230
  0.92640000   2.25300069
  0.92640000   2.25410195
  0.92640000   2.25311793
  0.92640000   2.25399022
  0.92640000   2.25321032
  0.92640000   2.25390121
  0.92640000   2.25328307
  0.92650000   2.25866741
  0.92650000   2.24980790
  0.92650000   2.25771607
  0.92650000   2.25065021
  0.92650000   2.25695552
  0.92650000   2.25132001
  0.92650000   2.25634749
  0.92650000   2.25185274
  0.92650000   2.25586140
  0.92650000   2.25227648
  0.92650000   2.25547277
  0.92650000   2.25261351
  0.92650000   2.25516201
  0.92650000   2.25288152
  0.92650000   2.25491347
  0.92650000   2.25309459
  0.92650000   2.25471464
  0.92650000   2.25326392
  0.92650000   2.25455551
  0.92650000   2.25339841
  0.92650000   2.25442811
  0.92650000   2.25350518
  0.92650000   2.25432604
  0.92650000   2.25358988
  0.92660000   2.25951896
  0.92660000   2.24970898
  0.92660000   2.25849537
  0.92660000   2.25062168
  0.92660000   2.25767189
  0.92660000   2.25135206
  0.92660000   2.25700941
  0.92660000   2.25193669
  0.92660000   2.25647647
  0.92660000   2.25240473
  0.92660000   2.25604772
  0.92660000   2.25277944
  0.92660000   2.25570276
  0.92660000   2.25307940
  0.92660000   2.25542519
  0.92660000   2.25331948
  0.92660000   2.25520178
  0.92660000   2.25351157
  0.92660000   2.25502193
  0.92660000   2.25366522
  0.92660000   2.25487708
  0.92660000   2.25378806
  0.92660000   2.25476038
  0.92660000   2.25388620
  0.92670000   2.26040671
  0.92670000   2.24957142
  0.92670000   2.25930884
  0.92670000   2.25055720
  0.92670000   2.25842005
  0.92670000   2.25135098
  0.92670000   2.25770056
  0.92670000   2.25199040
  0.92670000   2.25711812
  0.92670000   2.25250558
  0.92670000   2.25664662
  0.92670000   2.25292070
  0.92670000   2.25626492
  0.92670000   2.25325520
  0.92670000   2.25595589
  0.92670000   2.25352469
  0.92670000   2.25570566
  0.92670000   2.25374178
  0.92670000   2.25550300
  0.92670000   2.25391660
  0.92670000   2.25533882
  0.92670000   2.25405734
  0.92670000   2.25520576
  0.92670000   2.25417058
  0.92680000   2.26133243
  0.92680000   2.24939306
  0.92680000   2.26015849
  0.92680000   2.25045443
  0.92680000   2.25920220
  0.92680000   2.25131436
  0.92680000   2.25842322
  0.92680000   2.25201140
  0.92680000   2.25778868
  0.92680000   2.25257657
  0.92680000   2.25727180
  0.92680000   2.25303489
  0.92680000   2.25685077
  0.92680000   2.25340659
  0.92680000   2.25650780
  0.92680000   2.25370802
  0.92680000   2.25622839
  0.92680000   2.25395244
  0.92680000   2.25600072
  0.92680000   2.25415060
  0.92680000   2.25581518
  0.92680000   2.25431120
  0.92680000   2.25566392
  0.92680000   2.25444133
  0.92690000   2.26229789
  0.92690000   2.24917167
  0.92690000   2.26104638
  0.92690000   2.25031096
  0.92690000   2.26002059
  0.92690000   2.25123965
  0.92690000   2.25917978
  0.92690000   2.25199710
  0.92690000   2.25849061
  0.92690000   2.25261509
  0.92690000   2.25792576
  0.92690000   2.25311944
  0.92690000   2.25746278
  0.92690000   2.25353107
  0.92690000   2.25708331
  0.92690000   2.25386705
  0.92690000   2.25677227
  0.92690000   2.25414126
  0.92690000   2.25651729
  0.92690000   2.25436504
  0.92690000   2.25630824
  0.92690000   2.25454763
  0.92690000   2.25613681
  0.92690000   2.25469656
  0.92700000   2.26330482
  0.92700000   2.24890501
  0.92700000   2.26197455
  0.92700000   2.25012432
  0.92700000   2.26087749
  0.92700000   2.25112424
  0.92700000   2.25997272
  0.92700000   2.25194477
  0.92700000   2.25922651
  0.92700000   2.25261839
  0.92700000   2.25861111
  0.92700000   2.25317156
  0.92700000   2.25810359
  0.92700000   2.25362592
  0.92700000   2.25768503
  0.92700000   2.25399913
  0.92700000   2.25733984
  0.92700000   2.25430570
  0.92700000   2.25705515
  0.92700000   2.25455752
  0.92700000   2.25682031
  0.92700000   2.25476433
  0.92700000   2.25662659
  0.92700000   2.25493415
  0.92710000   2.26435494
  0.92710000   2.24859079
  0.92710000   2.26294505
  0.92710000   2.24989197
  0.92710000   2.26177526
  0.92710000   2.25096539
  0.92710000   2.26080457
  0.92710000   2.25185155
  0.92710000   2.25999907
  0.92710000   2.25258351
  0.92710000   2.25933065
  0.92710000   2.25318832
  0.92710000   2.25877600
  0.92710000   2.25368820
  0.92710000   2.25831576
  0.92710000   2.25410140
  0.92710000   2.25793386
  0.92710000   2.25444298
  0.92710000   2.25761695
  0.92710000   2.25472535
  0.92710000   2.25735397
  0.92710000   2.25495877
  0.92710000   2.25713570
  0.92710000   2.25515169
  0.92720000   2.26544991
  0.92720000   2.24822673
  0.92720000   2.26395994
  0.92720000   2.24961134
  0.92720000   2.26271625
  0.92720000   2.25076028
  0.92720000   2.26167796
  0.92720000   2.25171445
  0.92720000   2.26081108
  0.92720000   2.25250736
  0.92720000   2.26008730
  0.92720000   2.25316656
  0.92720000   2.25948301
  0.92720000   2.25371475
  0.92720000   2.25897850
  0.92720000   2.25417073
  0.92720000   2.25855729
  0.92720000   2.25455004
  0.92720000   2.25820563
  0.92720000   2.25486560
  0.92720000   2.25791202
  0.92720000   2.25512812
  0.92720000   2.25766687
  0.92720000   2.25534650
  0.92730000   2.26659132
  0.92730000   2.24781054
  0.92730000   2.26502120
  0.92730000   2.24927980
  0.92730000   2.26370282
  0.92730000   2.25050602
  0.92730000   2.26259554
  0.92730000   2.25153038
  0.92730000   2.26166543
  0.92730000   2.25238671
  0.92730000   2.26088412
  0.92730000   2.25310294
  0.92730000   2.26022780
  0.92730000   2.25370221
  0.92730000   2.25967648
  0.92730000   2.25420375
  0.92730000   2.25921337
  0.92730000   2.25462357
  0.92730000   2.25882436
  0.92730000   2.25497502
  0.92730000   2.25849759
  0.92730000   2.25526925
  0.92730000   2.25822310
  0.92730000   2.25551556
  0.92740000   2.26778070
  0.92740000   2.24733996
  0.92740000   2.26613082
  0.92740000   2.24889471
  0.92740000   2.26473734
  0.92740000   2.25019966
  0.92740000   2.26356001
  0.92740000   2.25129612
  0.92740000   2.26256512
  0.92740000   2.25221814
  0.92740000   2.26172431
  0.92740000   2.25299392
  0.92740000   2.26101369
  0.92740000   2.25364695
  0.92740000   2.26041312
  0.92740000   2.25419683
  0.92740000   2.25990556
  0.92740000   2.25465995
  0.92740000   2.25947661
  0.92740000   2.25505005
  0.92740000   2.25911409
  0.92740000   2.25537868
  0.92740000   2.25880772
  0.92740000   2.25565553
  0.92750000   2.26901946
  0.92750000   2.24681275
  0.92750000   2.26729067
  0.92750000   2.24845342
  0.92750000   2.26582214
  0.92750000   2.24983819
  0.92750000   2.26457409
  0.92750000   2.25100837
  0.92750000   2.26351316
  0.92750000   2.25199811
  0.92750000   2.26261114
  0.92750000   2.25283580
  0.92750000   2.26184419
  0.92750000   2.25354516
  0.92750000   2.26119206
  0.92750000   2.25414607
  0.92750000   2.26063757
  0.92750000   2.25465526
  0.92750000   2.26016610
  0.92750000   2.25508681
  0.92750000   2.25976523
  0.92750000   2.25545260
  0.92750000   2.25942439
  0.92750000   2.25576268
  0.92760000   2.27030891
  0.92760000   2.24622671
  0.92760000   2.26850258
  0.92760000   2.24795330
  0.92760000   2.26695948
  0.92760000   2.24941858
  0.92760000   2.26564049
  0.92760000   2.25066375
  0.92760000   2.26451263
  0.92760000   2.25172296
  0.92760000   2.26354801
  0.92760000   2.25262468
  0.92760000   2.26272291
  0.92760000   2.25339276
  0.92760000   2.26201711
  0.92760000   2.25404731
  0.92760000   2.26141334
  0.92760000   2.25460530
  0.92760000   2.26089686
  0.92760000   2.25508107
  0.92760000   2.26045506
  0.92760000   2.25548682
  0.92760000   2.26007714
  0.92760000   2.25583290
  0.92770000   2.27165024
  0.92770000   2.24557971
  0.92770000   2.26976825
  0.92770000   2.24739173
  0.92770000   2.26815159
  0.92770000   2.24893776
  0.92770000   2.26676186
  0.92770000   2.25025881
  0.92770000   2.26556664
  0.92770000   2.25138891
  0.92770000   2.26453839
  0.92770000   2.25235650
  0.92770000   2.26365364
  0.92770000   2.25318550
  0.92770000   2.26289227
  0.92770000   2.25389613
  0.92770000   2.26223706
  0.92770000   2.25450552
  0.92770000   2.26167320
  0.92770000   2.25502826
  0.92770000   2.26118794
  0.92770000   2.25547676
  0.92770000   2.26077034
  0.92770000   2.25586163
  0.92780000   2.27304448
  0.92780000   2.24486973
  0.92780000   2.27108924
  0.92780000   2.24676616
  0.92780000   2.26940057
  0.92780000   2.24839271
  0.92780000   2.26794084
  0.92780000   2.24979008
  0.92780000   2.26667826
  0.92780000   2.25099209
  0.92780000   2.26558577
  0.92780000   2.25202707
  0.92780000   2.26464022
  0.92780000   2.25291890
  0.92780000   2.26382171
  0.92780000   2.25368783
  0.92780000   2.26311313
  0.92780000   2.25435111
  0.92780000   2.26249967
  0.92780000   2.25492344
  0.92780000   2.26196857
  0.92780000   2.25541744
  0.92780000   2.26150876
  0.92780000   2.25584391
  0.92790000   2.27449251
  0.92790000   2.24409480
  0.92790000   2.27246700
  0.92790000   2.24607411
  0.92790000   2.27070841
  0.92790000   2.24778042
  0.92790000   2.26917996
  0.92790000   2.24925406
  0.92790000   2.26785054
  0.92790000   2.25052857
  0.92790000   2.26669366
  0.92790000   2.25163206
  0.92790000   2.26568659
  0.92790000   2.25258830
  0.92790000   2.26480973
  0.92790000   2.25341749
  0.92790000   2.26404613
  0.92790000   2.25413690
  0.92790000   2.26338113
  0.92790000   2.25476132
  0.92790000   2.26280196
  0.92790000   2.25530346
  0.92790000   2.26229754
  0.92790000   2.25577427
  0.92800000   2.27599503
  0.92800000   2.24325313
  0.92800000   2.27390276
  0.92800000   2.24531319
  0.92800000   2.27207693
  0.92800000   2.24709794
  0.92800000   2.27048160
  0.92800000   2.24864728
  0.92800000   2.26908644
  0.92800000   2.24999437
  0.92800000   2.26786556
  0.92800000   2.25116705
  0.92800000   2.26679672
  0.92800000   2.25218889
  0.92800000   2.26586070
  0.92800000   2.25307997
  0.92800000   2.26504084
  0.92800000   2.25385749
  0.92800000   2.26432263
  0.92800000   2.25453624
  0.92800000   2.26369342
  0.92800000   2.25512901
  0.92800000   2.26314216
  0.92800000   2.25564682
  0.92810000   2.27755255
  0.92810000   2.24234303
  0.92810000   2.27539761
  0.92810000   2.24448114
  0.92810000   2.27350778
  0.92810000   2.24634243
  0.92810000   2.27184804
  0.92810000   2.24796631
  0.92810000   2.27038881
  0.92810000   2.24938552
  0.92810000   2.26910488
  0.92810000   2.25062756
  0.92810000   2.26797457
  0.92810000   2.25171573
  0.92810000   2.26697910
  0.92810000   2.25266990
  0.92810000   2.26610215
  0.92810000   2.25350716
  0.92810000   2.26532946
  0.92810000   2.25424223
  0.92810000   2.26464855
  0.92810000   2.25488788
  0.92810000   2.26404849
  0.92810000   2.25545516
  0.92820000   2.27916536
  0.92820000   2.24136300
  0.92820000   2.27695237
  0.92820000   2.24357585
  0.92820000   2.27500241
  0.92820000   2.24551116
  0.92820000   2.27328132
  0.92820000   2.24720782
  0.92820000   2.27176034
  0.92820000   2.24869810
  0.92820000   2.27041494
  0.92820000   2.25000910
  0.92820000   2.26922404
  0.92820000   2.25116379
  0.92820000   2.26816938
  0.92820000   2.25218179
  0.92820000   2.26723502
  0.92820000   2.25307999
  0.92820000   2.26640704
  0.92820000   2.25387299
  0.92820000   2.26567319
  0.92820000   2.25457346
  0.92820000   2.26502270
  0.92820000   2.25519245
  0.92830000   2.28083356
  0.92830000   2.24031171
  0.92830000   2.27856767
  0.92830000   2.24259539
  0.92830000   2.27656202
  0.92830000   2.24460156
  0.92830000   2.27478328
  0.92830000   2.24636858
  0.92830000   2.27320350
  0.92830000   2.24792823
  0.92830000   2.27179886
  0.92830000   2.24930718
  0.92830000   2.27054892
  0.92830000   2.25052800
  0.92830000   2.26943594
  0.92830000   2.25161001
  0.92830000   2.26844446
  0.92830000   2.25256985
  0.92830000   2.26756092
  0.92830000   2.25342193
  0.92830000   2.26677336
  0.92830000   2.25417878
  0.92830000   2.26607124
  0.92830000   2.25485136
  0.92840000   2.28255699
  0.92840000   2.23918803
  0.92840000   2.28024386
  0.92840000   2.24153804
  0.92840000   2.27818752
  0.92840000   2.24361127
  0.92840000   2.27635548
  0.92840000   2.24544557
  0.92840000   2.27472053
  0.92840000   2.24707221
  0.92840000   2.27325958
  0.92840000   2.24851740
  0.92840000   2.27195282
  0.92840000   2.24980331
  0.92840000   2.27078309
  0.92840000   2.25094889
  0.92840000   2.26973542
  0.92840000   2.25197049
  0.92840000   2.26879666
  0.92840000   2.25288226
  0.92840000   2.26795520
  0.92840000   2.25369656
  0.92840000   2.26720079
  0.92840000   2.25442421
  0.92850000   2.28433527
  0.92850000   2.23799109
  0.92850000   2.28198103
  0.92850000   2.24040230
  0.92850000   2.27987958
  0.92850000   2.24253813
  0.92850000   2.27799917
  0.92850000   2.24443593
  0.92850000   2.27631335
  0.92850000   2.24612649
  0.92850000   2.27479972
  0.92850000   2.24763551
  0.92850000   2.27343911
  0.92850000   2.24898474
  0.92850000   2.27221493
  0.92850000   2.25019275
  0.92850000   2.27111272
  0.92850000   2.25127555
  0.92850000   2.27011978
  0.92850000   2.25224701
  0.92850000   2.26922491
  0.92850000   2.25311925
  0.92850000   2.26841815
  0.92850000   2.25390290
  0.92860000   2.28616777
  0.92860000   2.23672022
  0.92860000   2.28377897
  0.92860000   2.23918693
  0.92860000   2.28163848
  0.92860000   2.24138028
  0.92860000   2.27971527
  0.92860000   2.24333712
  0.92860000   2.27798355
  0.92860000   2.24508776
  0.92860000   2.27642159
  0.92860000   2.24665744
  0.92860000   2.27501083
  0.92860000   2.24806747
  0.92860000   2.27373526
  0.92860000   2.24933602
  0.92860000   2.27258095
  0.92860000   2.25047873
  0.92860000   2.27153566
  0.92860000   2.25150916
  0.92860000   2.27058859
  0.92860000   2.25243915
  0.92860000   2.26973016
  0.92860000   2.25327910
  0.92870000   2.28805362
  0.92870000   2.23537503
  0.92870000   2.28563718
  0.92870000   2.23789100
  0.92870000   2.28346422
  0.92870000   2.24013613
  0.92870000   2.28150431
  0.92870000   2.24214686
  0.92870000   2.27973230
  0.92870000   2.24395303
  0.92870000   2.27812706
  0.92870000   2.24557942
  0.92870000   2.27667063
  0.92870000   2.24704693
  0.92870000   2.27534755
  0.92870000   2.24837330
  0.92870000   2.27414439
  0.92870000   2.24957381
  0.92870000   2.27304940
  0.92870000   2.25066168
  0.92870000   2.27205219
  0.92870000   2.25164845
  0.92870000   2.27114356
  0.92870000   2.25254426
  0.92880000   2.28999168
  0.92880000   2.23395539
  0.92880000   2.28755485
  0.92880000   2.23651386
  0.92880000   2.28535639
  0.92880000   2.23880446
  0.92880000   2.28336642
  0.92880000   2.24086325
  0.92880000   2.28156034
  0.92880000   2.24271965
  0.92880000   2.27991757
  0.92880000   2.24439802
  0.92880000   2.27842069
  0.92880000   2.24591884
  0.92880000   2.27705478
  0.92880000   2.24729947
  0.92880000   2.27580688
  0.92880000   2.24855480
  0.92880000   2.27466571
  0.92880000   2.24969770
  0.92880000   2.27362131
  0.92880000   2.25073942
  0.92880000   2.27266485
  0.92880000   2.25168980
  0.92890000   2.29198059
  0.92890000   2.23246146
  0.92890000   2.28953087
  0.92890000   2.23505521
  0.92890000   2.28731424
  0.92890000   2.23738441
  0.92890000   2.28530130
  0.92890000   2.23948479
  0.92890000   2.28346790
  0.92890000   2.24138540
  0.92890000   2.28179399
  0.92890000   2.24311024
  0.92890000   2.28026263
  0.92890000   2.24467938
  0.92890000   2.27885936
  0.92890000   2.24610980
  0.92890000   2.27757170
  0.92890000   2.24741605
  0.92890000   2.27638878
  0.92890000   2.24861065
  0.92890000   2.27530107
  0.92890000   2.24970454
  0.92890000   2.27430011
  0.92890000   2.25070726
  0.92900000   2.29401871
  0.92900000   2.23089370
  0.92900000   2.29156378
  0.92900000   2.23351509
  0.92900000   2.28933661
  0.92900000   2.23587551
  0.92900000   2.28730816
  0.92900000   2.23801042
  0.92900000   2.28545472
  0.92900000   2.23994856
  0.92900000   2.28375664
  0.92900000   2.24171358
  0.92900000   2.28219743
  0.92900000   2.24332521
  0.92900000   2.28076304
  0.92900000   2.24480008
  0.92900000   2.27944143
  0.92900000   2.24615241
  0.92900000   2.27822211
  0.92900000   2.24739439
  0.92900000   2.27709593
  0.92900000   2.24853665
  0.92900000   2.27605481
  0.92900000   2.24958846
  0.92910000   2.29610419
  0.92910000   2.22925286
  0.92910000   2.29365184
  0.92910000   2.23189390
  0.92910000   2.29142194
  0.92910000   2.23427774
  0.92910000   2.28938577
  0.92910000   2.23643959
  0.92910000   2.28751995
  0.92910000   2.23840793
  0.92910000   2.28580519
  0.92910000   2.24020614
  0.92910000   2.28422538
  0.92910000   2.24185363
  0.92910000   2.28276683
  0.92910000   2.24336674
  0.92910000   2.28141786
  0.92910000   2.24475936
  0.92910000   2.28016836
  0.92910000   2.24604341
  0.92910000   2.27900952
  0.92910000   2.24722920
  0.92910000   2.27793359
  0.92910000   2.24832575
  0.92920000   2.29823494
  0.92920000   2.22754000
  0.92920000   2.29579300
  0.92920000   2.23019245
  0.92920000   2.29356831
  0.92920000   2.23259150
  0.92920000   2.29153239
  0.92920000   2.23477224
  0.92920000   2.28966216
  0.92920000   2.23676292
  0.92920000   2.28793864
  0.92920000   2.23858667
  0.92920000   2.28634598
  0.92920000   2.24026265
  0.92920000   2.28487085
  0.92920000   2.24180694
  0.92920000   2.28350187
  0.92920000   2.24323316
  0.92920000   2.28222924
  0.92920000   2.24455296
  0.92920000   2.28104444
  0.92920000   2.24577640
  0.92920000   2.27994003
  0.92920000   2.24691222
  0.92930000   2.30040868
  0.92930000   2.22575648
  0.92930000   2.29798490
  0.92930000   2.22841188
  0.92930000   2.29577337
  0.92930000   2.23081770
  0.92930000   2.29374581
  0.92930000   2.23300890
  0.92930000   2.29187935
  0.92930000   2.23501357
  0.92930000   2.29015526
  0.92930000   2.23685466
  0.92930000   2.28855795
  0.92930000   2.23855110
  0.92930000   2.28707433
  0.92930000   2.24011877
  0.92930000   2.28569329
  0.92930000   2.24157103
  0.92930000   2.28440530
  0.92930000   2.24291933
  0.92930000   2.28320209
  0.92930000   2.24417348
  0.92930000   2.28207648
  0.92930000   2.24534202
  0.92940000   2.30262290
  0.92940000   2.22390394
  0.92940000   2.30022490
  0.92940000   2.22655375
  0.92940000   2.29803443
  0.92940000   2.22895769
  0.92940000   2.29602333
  0.92940000   2.23115065
  0.92940000   2.29416891
  0.92940000   2.23316062
  0.92940000   2.29245264
  0.92940000   2.23501037
  0.92940000   2.29085912
  0.92940000   2.23671869
  0.92940000   2.28937550
  0.92940000   2.23830126
  0.92940000   2.28799085
  0.92940000   2.23977126
  0.92940000   2.28669586
  0.92940000   2.24113995
  0.92940000   2.28548250
  0.92940000   2.24241694
  0.92940000   2.28434377
  0.92940000   2.24361059
  0.92950000   2.30487492
  0.92950000   2.22198434
  0.92950000   2.30251013
  0.92950000   2.22461998
  0.92950000   2.30034843
  0.92950000   2.22701331
  0.92950000   2.29836178
  0.92950000   2.22919918
  0.92950000   2.29652764
  0.92950000   2.23120550
  0.92950000   2.29482761
  0.92950000   2.23305492
  0.92950000   2.29324648
  0.92950000   2.23476610
  0.92950000   2.29177155
  0.92950000   2.23635457
  0.92950000   2.29039207
  0.92950000   2.23783338
  0.92950000   2.28909890
  0.92950000   2.23921360
  0.92950000   2.28788418
  0.92950000   2.24050473
  0.92950000   2.28674109
  0.92950000   2.24171493
  0.92960000   2.30716193
  0.92960000   2.21999989
  0.92960000   2.30483746
  0.92960000   2.22261287
  0.92960000   2.30271199
  0.92960000   2.22498688
  0.92960000   2.30075757
  0.92960000   2.22715677
  0.92960000   2.29895177
  0.92960000   2.22915037
  0.92960000   2.29727632
  0.92960000   2.23099027
  0.92960000   2.29571614
  0.92960000   2.23269501
  0.92960000   2.29425866
  0.92960000   2.23428003
  0.92960000   2.29289328
  0.92960000   2.23575823
  0.92960000   2.29161098
  0.92960000   2.23714059
  0.92960000   2.29040404
  0.92960000   2.23843646
  0.92960000   2.28926579
  0.92960000   2.23965388
  0.92970000   2.30948095
  0.92970000   2.21795309
  0.92970000   2.30720355
  0.92970000   2.22053507
  0.92970000   2.30512142
  0.92970000   2.22288119
  0.92970000   2.30320668
  0.92970000   2.22502627
  0.92970000   2.30143701
  0.92970000   2.22699812
  0.92970000   2.29979422
  0.92970000   2.22881926
  0.92970000   2.29826337
  0.92970000   2.23050817
  0.92970000   2.29683197
  0.92970000   2.23208017
  0.92970000   2.29548955
  0.92970000   2.23354810
  0.92970000   2.29422720
  0.92970000   2.23492281
  0.92970000   2.29303732
  0.92970000   2.23621356
  0.92970000   2.29191331
  0.92970000   2.23742832
  0.92980000   2.31182890
  0.92980000   2.21584667
  0.92980000   2.30960489
  0.92980000   2.21838958
  0.92980000   2.30757277
  0.92980000   2.22069945
  0.92980000   2.30570474
  0.92980000   2.22281111
  0.92980000   2.30397856
  0.92980000   2.22475235
  0.92980000   2.30237615
  0.92980000   2.22654563
  0.92980000   2.30088263
  0.92980000   2.22820936
  0.92980000   2.29948565
  0.92980000   2.22975880
  0.92980000   2.29817480
  0.92980000   2.23120671
  0.92980000   2.29694128
  0.92980000   2.23256386
  0.92980000   2.29577757
  0.92980000   2.23383944
  0.92980000   2.29467718
  0.92980000   2.23504132
  0.92990000   2.31420261
  0.92990000   2.21368357
  0.92990000   2.31203782
  0.92990000   2.21617969
  0.92990000   2.31006188
  0.92990000   2.21844530
  0.92990000   2.30824707
  0.92990000   2.22051526
  0.92990000   2.30657122
  0.92990000   2.22241733
  0.92990000   2.30501636
  0.92990000   2.22417392
  0.92990000   2.30356769
  0.92990000   2.22580340
  0.92990000   2.30221295
  0.92990000   2.22732095
  0.92990000   2.30094181
  0.92990000   2.22873927
  0.92990000   2.29974557
  0.92990000   2.23006907
  0.92990000   2.29861676
  0.92990000   2.23131946
  0.92990000   2.29754898
  0.92990000   2.23249826
  0.93000000   2.31659887
  0.93000000   2.21146697
  0.93000000   2.31449856
  0.93000000   2.21390898
  0.93000000   2.31258439
  0.93000000   2.21612276
  0.93000000   2.31082869
  0.93000000   2.21814318
  0.93000000   2.30920941
  0.93000000   2.21999797
  0.93000000   2.30770863
  0.93000000   2.22170950
  0.93000000   2.30631166
  0.93000000   2.22329609
  0.93000000   2.30500632
  0.93000000   2.22477284
  0.93000000   2.30378238
  0.93000000   2.22615241
  0.93000000   2.30263118
  0.93000000   2.22744544
  0.93000000   2.30154536
  0.93000000   2.22866099
  0.93000000   2.30051857
  0.93000000   2.22980680
  0.93010000   2.31901440
  0.93010000   2.20920017
  0.93010000   2.31698327
  0.93010000   2.21158127
  0.93010000   2.31513582
  0.93010000   2.21373619
  0.93010000   2.31344447
  0.93010000   2.21569979
  0.93010000   2.31188725
  0.93010000   2.21749976
  0.93010000   2.31044634
  0.93010000   2.21915846
  0.93010000   2.30910714
  0.93010000   2.22069412
  0.93010000   2.30785755
  0.93010000   2.22212180
  0.93010000   2.30668742
  0.93010000   2.22345409
  0.93010000   2.30558820
  0.93010000   2.22470158
  0.93010000   2.30455256
  0.93010000   2.22587324
  0.93010000   2.30357424
  0.93010000   2.22697680
  0.93020000   2.32144593
  0.93020000   2.20688667
  0.93020000   2.31948806
  0.93020000   2.20920062
  0.93020000   2.31771160
  0.93020000   2.21129024
  0.93020000   2.31608911
  0.93020000   2.21319038
  0.93020000   2.31459866
  0.93020000   2.21492871
  0.93020000   2.31322257
  0.93020000   2.21652752
  0.93020000   2.31194631
  0.93020000   2.21800500
  0.93020000   2.31075789
  0.93020000   2.21937614
  0.93020000   2.30964723
  0.93020000   2.22065346
  0.93020000   2.30860584
  0.93020000   2.22184749
  0.93020000   2.30762650
  0.93020000   2.22296717
  0.93020000   2.30670301
  0.93020000   2.22402012
  0.93030000   2.32389021
  0.93030000   2.20453006
  0.93030000   2.32200901
  0.93030000   2.20677124
  0.93030000   2.32030714
  0.93030000   2.20878979
  0.93030000   2.31875722
  0.93030000   2.21062058
  0.93030000   2.31733745
  0.93030000   2.21229122
  0.93030000   2.31603021
  0.93030000   2.21382396
  0.93030000   2.31482112
  0.93030000   2.21523690
  0.93030000   2.31369823
  0.93030000   2.21654499
  0.93030000   2.31265158
  0.93030000   2.21776068
  0.93030000   2.31167275
  0.93030000   2.21889444
  0.93030000   2.31075459
  0.93030000   2.21995513
  0.93030000   2.30989098
  0.93030000   2.22095033
  0.93040000   2.32634402
  0.93040000   2.20213400
  0.93040000   2.32454228
  0.93040000   2.20429746
  0.93040000   2.32291784
  0.93040000   2.20623994
  0.93040000   2.32144343
  0.93040000   2.20799628
  0.93040000   2.32009735
  0.93040000   2.20959406
  0.93040000   2.31886209
  0.93040000   2.21105546
  0.93040000   2.31772335
  0.93040000   2.21239853
  0.93040000   2.31666929
  0.93040000   2.21363816
  0.93040000   2.31569002
  0.93040000   2.21478672
  0.93040000   2.31477722
  0.93040000   2.21585462
  0.93040000   2.31392380
  0.93040000   2.21685065
  0.93040000   2.31312370
  0.93040000   2.21778235
  0.93050000   2.32880420
  0.93050000   2.19970225
  0.93050000   2.32708404
  0.93050000   2.20178372
  0.93050000   2.32553917
  0.93050000   2.20364588
  0.93050000   2.32414241
  0.93050000   2.20532352
  0.93050000   2.32287217
  0.93050000   2.20684419
  0.93050000   2.32171105
  0.93050000   2.20823002
  0.93050000   2.32064484
  0.93050000   2.20949898
  0.93050000   2.31966178
  0.93050000   2.21066590
  0.93050000   2.31875208
  0.93050000   2.21174309
  0.93050000   2.31790749
  0.93050000   2.21274089
  0.93050000   2.31712100
  0.93050000   2.21366804
  0.93050000   2.31638661
  0.93050000   2.21453202
  0.93060000   2.33126769
  0.93060000   2.19723855
  0.93060000   2.32963057
  0.93060000   2.19923452
  0.93060000   2.32816668
  0.93060000   2.20101289
  0.93060000   2.32684893
  0.93060000   2.20260847
  0.93060000   2.32565583
  0.93060000   2.20404875
  0.93060000   2.32457007
  0.93060000   2.20535580
  0.93060000   2.32357754
  0.93060000   2.20654754
  0.93060000   2.32266657
  0.93060000   2.20763873
  0.93060000   2.32182745
  0.93060000   2.20864161
  0.93060000   2.32105200
  0.93060000   2.20956648
  0.93060000   2.32033329
  0.93060000   2.21042202
  0.93060000   2.31966537
  0.93060000   2.21121564
  0.93070000   2.33373150
  0.93070000   2.19474668
  0.93070000   2.33217829
  0.93070000   2.19665434
  0.93070000   2.33079610
  0.93070000   2.19834629
  0.93070000   2.32955794
  0.93070000   2.19985732
  0.93070000   2.32844244
  0.93070000   2.20121489
  0.93070000   2.32743237
  0.93070000   2.20244101
  0.93070000   2.32651370
  0.93070000   2.20355355
  0.93070000   2.32567486
  0.93070000   2.20456720
  0.93070000   2.32490622
  0.93070000   2.20549416
  0.93070000   2.32419966
  0.93070000   2.20634465
  0.93070000   2.32354831
  0.93070000   2.20712731
  0.93070000   2.32294630
  0.93070000   2.20784950
  0.93080000   2.33619280
  0.93080000   2.19223037
  0.93080000   2.33472372
  0.93080000   2.19404763
  0.93080000   2.33342329
  0.93080000   2.19565133
  0.93080000   2.33226461
  0.93080000   2.19707621
  0.93080000   2.33122637
  0.93080000   2.19834971
  0.93080000   2.33029146
  0.93080000   2.19949378
  0.93080000   2.32944594
  0.93080000   2.20052625
  0.93080000   2.32867831
  0.93080000   2.20146173
  0.93080000   2.32797902
  0.93080000   2.20231239
  0.93080000   2.32734001
  0.93080000   2.20308839
  0.93080000   2.32675449
  0.93080000   2.20379832
  0.93080000   2.32621663
  0.93080000   2.20444949
  0.93090000   2.33864884
  0.93090000   2.18969329
  0.93090000   2.33726359
  0.93090000   2.19141880
  0.93090000   2.33604436
  0.93090000   2.19293318
  0.93090000   2.33496434
  0.93090000   2.19427117
  0.93090000   2.33400232
  0.93090000   2.19546015
  0.93090000   2.33314129
  0.93090000   2.19652204
  0.93090000   2.33236737
  0.93090000   2.19747460
  0.93090000   2.33166917
  0.93090000   2.19833242
  0.93090000   2.33103719
  0.93090000   2.19910757
  0.93090000   2.33046346
  0.93090000   2.19981019
  0.93090000   2.32994124
  0.93090000   2.20044880
  0.93090000   2.32946478
  0.93090000   2.20103067
  0.93100000   2.34109707
  0.93100000   2.18713903
  0.93100000   2.33979479
  0.93100000   2.18877213
  0.93100000   2.33865562
  0.93100000   2.19019689
  0.93100000   2.33765284
  0.93100000   2.19144804
  0.93100000   2.33676535
  0.93100000   2.19255293
  0.93100000   2.33597622
  0.93100000   2.19353342
  0.93100000   2.33527166
  0.93100000   2.19440722
  0.93100000   2.33464036
  0.93100000   2.19518885
  0.93100000   2.33407290
  0.93100000   2.19589034
  0.93100000   2.33356139
  0.93100000   2.19652175
  0.93100000   2.33309915
  0.93100000   2.19709156
  0.93100000   2.33268051
  0.93100000   2.19760699
  0.93110000   2.34353507
  0.93110000   2.18457110
  0.93110000   2.34231442
  0.93110000   2.18611177
  0.93110000   2.34125365
  0.93110000   2.18744732
  0.93110000   2.34032616
  0.93110000   2.18861245
  0.93110000   2.33951093
  0.93110000   2.18963446
  0.93110000   2.33879112
  0.93110000   2.19053516
  0.93110000   2.33815306
  0.93110000   2.19133220
  0.93110000   2.33758552
  0.93110000   2.19204001
  0.93110000   2.33707917
  0.93110000   2.19267057
  0.93110000   2.33662622
  0.93110000   2.19323387
  0.93110000   2.33622006
  0.93110000   2.19373830
  0.93110000   2.33585509
  0.93110000   2.19419101
  0.93120000   2.34596057
  0.93120000   2.18199285
  0.93120000   2.34481978
  0.93120000   2.18344172
  0.93120000   2.34383531
  0.93120000   2.18468912
  0.93120000   2.34298066
  0.93120000   2.18576973
  0.93120000   2.34223493
  0.93120000   2.18671080
  0.93120000   2.34158140
  0.93120000   2.18753405
  0.93120000   2.34100649
  0.93120000   2.18825705
  0.93120000   2.34049910
  0.93120000   2.18889416
  0.93120000   2.34004999
  0.93120000   2.18945726
  0.93120000   2.33965148
  0.93120000   2.18995624
  0.93120000   2.33929706
  0.93120000   2.19039941
  0.93120000   2.33898124
  0.93120000   2.19079382
  0.93130000   2.34837150
  0.93130000   2.17940754
  0.93130000   2.34730840
  0.93130000   2.18076577
  0.93130000   2.34639772
  0.93130000   2.18192669
  0.93130000   2.34561308
  0.93130000   2.18292490
  0.93130000   2.34493370
  0.93130000   2.18378757
  0.93130000   2.34434300
  0.93130000   2.18453633
  0.93130000   2.34382753
  0.93130000   2.18518865
  0.93130000   2.34337632
  0.93130000   2.18575876
  0.93130000   2.34298027
  0.93130000   2.18625843
  0.93130000   2.34263181
  0.93130000   2.18669742
  0.93130000   2.34232457
  0.93130000   2.18708394
  0.93130000   2.34205316
  0.93130000   2.18742489
  0.93140000   2.35076593
  0.93140000   2.17681823
  0.93140000   2.34977803
  0.93140000   2.17808754
  0.93140000   2.34893830
  0.93140000   2.17916417
  0.93140000   2.34822050
  0.93140000   2.18008263
  0.93140000   2.34760401
  0.93140000   2.18086998
  0.93140000   2.34707241
  0.93140000   2.18154772
  0.93140000   2.34661242
  0.93140000   2.18213317
  0.93140000   2.34621321
  0.93140000   2.18264044
  0.93140000   2.34586584
  0.93140000   2.18308111
  0.93140000   2.34556291
  0.93140000   2.18346480
  0.93140000   2.34529819
  0.93140000   2.18379955
  0.93140000   2.34506646
  0.93140000   2.18409211
  0.93150000   2.35314212
  0.93150000   2.17422784
  0.93150000   2.35222665
  0.93150000   2.17541040
  0.93150000   2.35145475
  0.93150000   2.17640539
  0.93150000   2.35080037
  0.93150000   2.17724720
  0.93150000   2.35024309
  0.93150000   2.17796273
  0.93150000   2.34976666
  0.93150000   2.17857332
  0.93150000   2.34935802
  0.93150000   2.17909609
  0.93150000   2.34900652
  0.93150000   2.17954496
  0.93150000   2.34870342
  0.93150000   2.17993131
  0.93150000   2.34844149
  0.93150000   2.18026458
  0.93150000   2.34821470
  0.93150000   2.18055257
  0.93150000   2.34801801
  0.93150000   2.18080186
  0.93160000   2.35549850
  0.93160000   2.17163911
  0.93160000   2.35465244
  0.93160000   2.17273751
  0.93160000   2.35394505
  0.93160000   2.17365390
  0.93160000   2.35335049
  0.93160000   2.17442253
  0.93160000   2.35284858
  0.93160000   2.17507008
  0.93160000   2.35242331
  0.93160000   2.17561766
  0.93160000   2.35206183
  0.93160000   2.17608217
  0.93160000   2.35175374
  0.93160000   2.17647726
  0.93160000   2.35149053
  0.93160000   2.17681408
  0.93160000   2.35126518
  0.93160000   2.17710181
  0.93160000   2.35107190
  0.93160000   2.17734803
  0.93160000   2.35090583
  0.93160000   2.17755905
  0.93170000   2.35783366
  0.93170000   2.16905461
  0.93170000   2.35705383
  0.93170000   2.17007176
  0.93170000   2.35640747
  0.93170000   2.17091294
  0.93170000   2.35586902
  0.93170000   2.17161214
  0.93170000   2.35541857
  0.93170000   2.17219578
  0.93170000   2.35504039
  0.93170000   2.17268468
  0.93170000   2.35472192
  0.93170000   2.17309545
  0.93170000   2.35445303
  0.93170000   2.17344144
  0.93170000   2.35422546
  0.93170000   2.17373351
  0.93170000   2.35403246
  0.93170000   2.17398052
  0.93170000   2.35386849
  0.93170000   2.17418979
  0.93170000   2.35372893
  0.93170000   2.17436732
  0.93180000   2.36014638
  0.93180000   2.16647672
  0.93180000   2.35942945
  0.93180000   2.16741584
  0.93180000   2.35884054
  0.93180000   2.16818542
  0.93180000   2.35835442
  0.93180000   2.16881915
  0.93180000   2.35795151
  0.93180000   2.16934310
  0.93180000   2.35761642
  0.93180000   2.16977775
  0.93180000   2.35733689
  0.93180000   2.17013933
  0.93180000   2.35710312
  0.93180000   2.17044085
  0.93180000   2.35690714
  0.93180000   2.17069282
  0.93180000   2.35674252
  0.93180000   2.17090376
  0.93180000   2.35660397
  0.93180000   2.17108063
  0.93180000   2.35648714
  0.93180000   2.17122915
  0.93190000   2.36243557
  0.93190000   2.16390761
  0.93190000   2.36177812
  0.93190000   2.16477216
  0.93190000   2.36124304
  0.93190000   2.16547396
  0.93190000   2.36080548
  0.93190000   2.16604630
  0.93190000   2.36044624
  0.93190000   2.16651486
  0.93190000   2.36015031
  0.93190000   2.16689967
  0.93190000   2.35990582
  0.93190000   2.16721656
  0.93190000   2.35970329
  0.93190000   2.16747812
  0.93190000   2.35953512
  0.93190000   2.16769445
  0.93190000   2.35939519
  0.93190000   2.16787368
  0.93190000   2.35927850
  0.93190000   2.16802242
  0.93190000   2.35918100
  0.93190000   2.16814603
  0.93200000   2.36470031
  0.93200000   2.16134931
  0.93200000   2.36409888
  0.93200000   2.16214291
  0.93200000   2.36361400
  0.93200000   2.16278086
  0.93200000   2.36322126
  0.93200000   2.16329597
  0.93200000   2.36290192
  0.93200000   2.16371342
  0.93200000   2.36264139
  0.93200000   2.16405276
  0.93200000   2.36242820
  0.93200000   2.16432932
  0.93200000   2.36225329
  0.93200000   2.16455523
  0.93200000   2.36210942
  0.93200000   2.16474012
  0.93200000   2.36199080
  0.93200000   2.16489171
  0.93200000   2.36189278
  0.93200000   2.16501621
  0.93200000   2.36181158
  0.93200000   2.16511863
  0.93210000   2.36693983
  0.93210000   2.15880362
  0.93210000   2.36639094
  0.93210000   2.15953003
  0.93210000   2.36595266
  0.93210000   2.16010813
  0.93210000   2.36560111
  0.93210000   2.16057017
  0.93210000   2.36531802
  0.93210000   2.16094075
  0.93210000   2.36508929
  0.93210000   2.16123885
  0.93210000   2.36490392
  0.93210000   2.16147925
  0.93210000   2.36475326
  0.93210000   2.16167356
  0.93210000   2.36463048
  0.93210000   2.16183093
  0.93210000   2.36453015
  0.93210000   2.16195861
  0.93210000   2.36444794
  0.93210000   2.16206239
  0.93210000   2.36438039
  0.93210000   2.16214690
  0.93220000   2.36915349
  0.93220000   2.15627218
  0.93220000   2.36865370
  0.93220000   2.15693523
  0.93220000   2.36825850
  0.93220000   2.15745751
  0.93220000   2.36794459
  0.93220000   2.15787059
  0.93220000   2.36769428
  0.93220000   2.15819842
  0.93220000   2.36749397
  0.93220000   2.15845934
  0.93220000   2.36733317
  0.93220000   2.15866753
  0.93220000   2.36720368
  0.93220000   2.15883402
  0.93220000   2.36709908
  0.93220000   2.15896744
  0.93220000   2.36701433
  0.93220000   2.15907458
  0.93220000   2.36694544
  0.93220000   2.15916079
  0.93220000   2.36688924
  0.93220000   2.15923030
  0.93230000   2.37134080
  0.93230000   2.15375647
  0.93230000   2.37088669
  0.93230000   2.15436003
  0.93230000   2.37053115
  0.93230000   2.15483046
  0.93230000   2.37025151
  0.93230000   2.15519860
  0.93230000   2.37003068
  0.93230000   2.15548764
  0.93230000   2.36985565
  0.93230000   2.15571523
  0.93230000   2.36971643
  0.93230000   2.15589489
  0.93230000   2.36960531
  0.93230000   2.15603705
  0.93230000   2.36951630
  0.93230000   2.15614979
  0.93230000   2.36944474
  0.93230000   2.15623940
  0.93230000   2.36938698
  0.93230000   2.15631079
  0.93230000   2.36934016
  0.93230000   2.15636781
  0.93240000   2.37350136
  0.93240000   2.15125778
  0.93240000   2.37308963
  0.93240000   2.15180570
  0.93240000   2.37277044
  0.93240000   2.15222821
  0.93240000   2.37252185
  0.93240000   2.15255528
  0.93240000   2.37232741
  0.93240000   2.15280931
  0.93240000   2.37217474
  0.93240000   2.15300718
  0.93240000   2.37205438
  0.93240000   2.15316172
  0.93240000   2.37195911
  0.93240000   2.15328271
  0.93240000   2.37188339
  0.93240000   2.15337769
  0.93240000   2.37182294
  0.93240000   2.15345244
  0.93240000   2.37177444
  0.93240000   2.15351142
  0.93240000   2.37173532
  0.93240000   2.15355811
  0.93250000   2.37563492
  0.93250000   2.14877723
  0.93250000   2.37526233
  0.93250000   2.14927333
  0.93250000   2.37497634
  0.93250000   2.14965173
  0.93250000   2.37475576
  0.93250000   2.14994147
  0.93250000   2.37458486
  0.93250000   2.15016405
  0.93250000   2.37445186
  0.93250000   2.15033556
  0.93250000   2.37434790
  0.93250000   2.15046809
  0.93250000   2.37426624
  0.93250000   2.15057079
  0.93250000   2.37420179
  0.93250000   2.15065060
  0.93250000   2.37415064
  0.93250000   2.15071281
  0.93250000   2.37410979
  0.93250000   2.15076147
  0.93250000   2.37407696
  0.93250000   2.15079967
  0.93260000   2.37774130
  0.93260000   2.14631581
  0.93260000   2.37740475
  0.93260000   2.14676382
  0.93260000   2.37714896
  0.93260000   2.14710179
  0.93260000   2.37695356
  0.93260000   2.14735773
  0.93260000   2.37680353
  0.93260000   2.14755221
  0.93260000   2.37668778
  0.93260000   2.14770045
  0.93260000   2.37659800
  0.93260000   2.14781381
  0.93260000   2.37652798
  0.93260000   2.14790076
  0.93260000   2.37647303
  0.93260000   2.14796769
  0.93260000   2.37642962
  0.93260000   2.14801941
  0.93260000   2.37639507
  0.93260000   2.14805952
  0.93260000   2.37636735
  0.93260000   2.14809079
  0.93270000   2.37982044
  0.93270000   2.14387435
  0.93270000   2.37951696
  0.93270000   2.14427791
  0.93270000   2.37928854
  0.93270000   2.14457898
  0.93270000   2.37911566
  0.93270000   2.14480445
  0.93270000   2.37898409
  0.93270000   2.14497392
  0.93270000   2.37888338
  0.93270000   2.14510173
  0.93270000   2.37880582
  0.93270000   2.14519846
  0.93270000   2.37874569
  0.93270000   2.14527195
  0.93270000   2.37869872
  0.93270000   2.14532800
  0.93270000   2.37866174
  0.93270000   2.14537095
  0.93270000   2.37863234
  0.93270000   2.14540403
  0.93270000   2.37860875
  0.93270000   2.14542965
  0.93280000   2.38187237
  0.93280000   2.14145354
  0.93280000   2.38159913
  0.93280000   2.14181617
  0.93280000   2.38139542
  0.93280000   2.14208368
  0.93280000   2.38124262
  0.93280000   2.14228181
  0.93280000   2.38112728
  0.93280000   2.14242912
  0.93280000   2.38103964
  0.93280000   2.14253907
  0.93280000   2.38097256
  0.93280000   2.14262146
  0.93280000   2.38092080
  0.93280000   2.14268348
  0.93280000   2.38088050
  0.93280000   2.14273039
  0.93280000   2.38084882
  0.93280000   2.14276606
  0.93280000   2.38082363
  0.93280000   2.14279338
  0.93280000   2.38080337
  0.93280000   2.14281443
  0.93290000   2.38389717
  0.93290000   2.13905396
  0.93290000   2.38365149
  0.93290000   2.13937903
  0.93290000   2.38347002
  0.93290000   2.13961614
  0.93290000   2.38333505
  0.93290000   2.13978984
  0.93290000   2.38323395
  0.93290000   2.13991761
  0.93290000   2.38315761
  0.93290000   2.14001201
  0.93290000   2.38309948
  0.93290000   2.14008208
  0.93290000   2.38305478
  0.93290000   2.14013437
  0.93290000   2.38302003
  0.93290000   2.14017362
  0.93290000   2.38299270
  0.93290000   2.14020330
  0.93290000   2.38297093
  0.93290000   2.14022590
  0.93290000   2.38295334
  0.93290000   2.14024328
  0.93300000   2.38589503
  0.93300000   2.13667605
  0.93300000   2.38567438
  0.93300000   2.13696678
  0.93300000   2.38551284
  0.93300000   2.13717647
  0.93300000   2.38539365
  0.93300000   2.13732840
  0.93300000   2.38530498
  0.93300000   2.13743901
  0.93300000   2.38523839
  0.93300000   2.13751993
  0.93300000   2.38518787
  0.93300000   2.13757947
  0.93300000   2.38514909
  0.93300000   2.13762355
  0.93300000   2.38511895
  0.93300000   2.13765643
  0.93300000   2.38509519
  0.93300000   2.13768116
  0.93300000   2.38507618
  0.93300000   2.13769994
  0.93300000   2.38506073
  0.93300000   2.13771436
  0.93310000   2.38786616
  0.93310000   2.13432015
  0.93310000   2.38766818
  0.93310000   2.13457959
  0.93310000   2.38752445
  0.93310000   2.13476462
  0.93310000   2.38741918
  0.93310000   2.13489727
  0.93310000   2.38734132
  0.93310000   2.13499285
  0.93310000   2.38728309
  0.93310000   2.13506215
  0.93310000   2.38723902
  0.93310000   2.13511271
  0.93310000   2.38720521
  0.93310000   2.13514990
  0.93310000   2.38717886
  0.93310000   2.13517748
  0.93310000   2.38715802
  0.93310000   2.13519816
  0.93310000   2.38714124
  0.93310000   2.13521385
  0.93310000   2.38712751
  0.93310000   2.13522590
  0.93320000   2.38981086
  0.93320000   2.13198652
  0.93320000   2.38963334
  0.93320000   2.13221753
  0.93320000   2.38950548
  0.93320000   2.13238049
  0.93320000   2.38941243
  0.93320000   2.13249608
  0.93320000   2.38934394
  0.93320000   2.13257858
  0.93320000   2.38929287
  0.93320000   2.13263787
  0.93320000   2.38925425
  0.93320000   2.13268083
  0.93320000   2.38922457
  0.93320000   2.13271223
  0.93320000   2.38920136
  0.93320000   2.13273545
  0.93320000   2.38918289
  0.93320000   2.13275282
  0.93320000   2.38916791
  0.93320000   2.13276600
  0.93320000   2.38915554
  0.93320000   2.13277616
  0.93330000   2.39172945
  0.93330000   2.12967529
  0.93330000   2.39157036
  0.93330000   2.12988058
  0.93330000   2.39145658
  0.93330000   2.13002382
  0.93330000   2.39137423
  0.93330000   2.13012441
  0.93330000   2.39131384
  0.93330000   2.13019555
  0.93330000   2.39126887
  0.93330000   2.13024628
  0.93330000   2.39123483
  0.93330000   2.13028280
  0.93330000   2.39120859
  0.93330000   2.13030939
  0.93330000   2.39118796
  0.93330000   2.13032900
  0.93330000   2.39117142
  0.93330000   2.13034367
  0.93330000   2.39115789
  0.93330000   2.13035484
  0.93330000   2.39114660
  0.93330000   2.13036349
  0.93340000   2.39362233
  0.93340000   2.12738653
  0.93340000   2.39347975
  0.93340000   2.12756862
  0.93340000   2.39337843
  0.93340000   2.12769433
  0.93340000   2.39330543
  0.93340000   2.12778176
  0.93340000   2.39325201
  0.93340000   2.12784308
  0.93340000   2.39321223
  0.93340000   2.12788649
  0.93340000   2.39318204
  0.93340000   2.12791759
  0.93340000   2.39315864
  0.93340000   2.12794017
  0.93340000   2.39314013
  0.93340000   2.12795682
  0.93340000   2.39312515
  0.93340000   2.12796930
  0.93340000   2.39311278
  0.93340000   2.12797884
  0.93340000   2.39310237
  0.93340000   2.12798629
  0.93350000   2.39548988
  0.93350000   2.12512025
  0.93350000   2.39536209
  0.93350000   2.12528147
  0.93350000   2.39527177
  0.93350000   2.12539165
  0.93350000   2.39520689
  0.93350000   2.12546757
  0.93350000   2.39515946
  0.93350000   2.12552041
  0.93350000   2.39512407
  0.93350000   2.12555761
  0.93350000   2.39509710
  0.93350000   2.12558416
  0.93350000   2.39507606
  0.93350000   2.12560342
  0.93350000   2.39505927
  0.93350000   2.12561763
  0.93350000   2.39504557
  0.93350000   2.12562834
  0.93350000   2.39503414
  0.93350000   2.12563658
  0.93350000   2.39502442
  0.93350000   2.12564306
  0.93360000   2.39733257
  0.93360000   2.12287637
  0.93360000   2.39721796
  0.93360000   2.12301889
  0.93360000   2.39713730
  0.93360000   2.12311533
  0.93360000   2.39707948
  0.93360000   2.12318124
  0.93360000   2.39703717
  0.93360000   2.12322680
  0.93360000   2.39700550
  0.93360000   2.12325873
  0.93360000   2.39698121
  0.93360000   2.12328147
  0.93360000   2.39696212
  0.93360000   2.12329797
  0.93360000   2.39694674
  0.93360000   2.12331020
  0.93360000   2.39693407
  0.93360000   2.12331946
  0.93360000   2.39692339
  0.93360000   2.12332665
  0.93360000   2.39691423
  0.93360000   2.12333237
  0.93370000   2.39915084
  0.93370000   2.12065476
  0.93370000   2.39904796
  0.93370000   2.12078057
  0.93370000   2.39897577
  0.93370000   2.12086492
  0.93370000   2.39892405
  0.93370000   2.12092213
  0.93370000   2.39888611
  0.93370000   2.12096145
  0.93370000   2.39885757
  0.93370000   2.12098893
  0.93370000   2.39883553
  0.93370000   2.12100849
  0.93370000   2.39881804
  0.93370000   2.12102272
  0.93370000   2.39880382
  0.93370000   2.12103332
  0.93370000   2.39879198
  0.93370000   2.12104141
  0.93370000   2.39878191
  0.93370000   2.12104776
  0.93370000   2.39877320
  0.93370000   2.12105286
  0.93380000   2.40094518
  0.93380000   2.11845524
  0.93380000   2.40085269
  0.93380000   2.11856617
  0.93380000   2.40078792
  0.93380000   2.11863991
  0.93380000   2.40074146
  0.93380000   2.11868958
  0.93380000   2.40070725
  0.93380000   2.11872358
  0.93380000   2.40068134
  0.93380000   2.11874729
  0.93380000   2.40066116
  0.93380000   2.11876421
  0.93380000   2.40064500
  0.93380000   2.11877656
  0.93380000   2.40063172
  0.93380000   2.11878584
  0.93380000   2.40062056
  0.93380000   2.11879299
  0.93380000   2.40061099
  0.93380000   2.11879865
  0.93380000   2.40060264
  0.93380000   2.11880325
  0.93390000   2.40271609
  0.93390000   2.11627759
  0.93390000   2.40263280
  0.93390000   2.11637530
  0.93390000   2.40257449
  0.93390000   2.11643975
  0.93390000   2.40253256
  0.93390000   2.11648292
  0.93390000   2.40250150
  0.93390000   2.11651238
  0.93390000   2.40247781
  0.93390000   2.11653294
  0.93390000   2.40245917
  0.93390000   2.11654765
  0.93390000   2.40244410
  0.93390000   2.11655847
  0.93390000   2.40243160
  0.93390000   2.11656666
  0.93390000   2.40242099
  0.93390000   2.11657303
  0.93390000   2.40241183
  0.93390000   2.11657815
  0.93390000   2.40240378
  0.93390000   2.11658235
  0.93400000   2.40446408
  0.93400000   2.11412154
  0.93400000   2.40438890
  0.93400000   2.11420755
  0.93400000   2.40433621
  0.93400000   2.11426389
  0.93400000   2.40429816
  0.93400000   2.11430147
  0.93400000   2.40426979
  0.93400000   2.11432708
  0.93400000   2.40424794
  0.93400000   2.11434499
  0.93400000   2.40423060
  0.93400000   2.11435787
  0.93400000   2.40421643
  0.93400000   2.11436742
  0.93400000   2.40420456
  0.93400000   2.11437472
  0.93400000   2.40419441
  0.93400000   2.11438047
  0.93400000   2.40418557
  0.93400000   2.11438513
  0.93400000   2.40417777
  0.93400000   2.11438900
  0.93410000   2.40618966
  0.93410000   2.11198680
  0.93410000   2.40612161
  0.93410000   2.11206248
  0.93410000   2.40607380
  0.93410000   2.11211177
  0.93410000   2.40603907
  0.93410000   2.11214455
  0.93410000   2.40601297
  0.93410000   2.11216690
  0.93410000   2.40599268
  0.93410000   2.11218258
  0.93410000   2.40597640
  0.93410000   2.11219395
  0.93410000   2.40596298
  0.93410000   2.11220245
  0.93410000   2.40595163
  0.93410000   2.11220902
  0.93410000   2.40594186
  0.93410000   2.11221426
  0.93410000   2.40593330
  0.93410000   2.11221855
  0.93410000   2.40592570
  0.93410000   2.11222215
  0.93420000   2.40789336
  0.93420000   2.10987304
  0.93420000   2.40783157
  0.93420000   2.10993963
  0.93420000   2.40778797
  0.93420000   2.10998280
  0.93420000   2.40775609
  0.93420000   2.11001147
  0.93420000   2.40773190
  0.93420000   2.11003106
  0.93420000   2.40771291
  0.93420000   2.11004489
  0.93420000   2.40769753
  0.93420000   2.11005499
  0.93420000   2.40768471
  0.93420000   2.11006263
  0.93420000   2.40767380
  0.93420000   2.11006861
  0.93420000   2.40766434
  0.93420000   2.11007342
  0.93420000   2.40765601
  0.93420000   2.11007741
  0.93420000   2.40764859
  0.93420000   2.11008078
  0.93430000   2.40957569
  0.93430000   2.10777992
  0.93430000   2.40951938
  0.93430000   2.10783853
  0.93430000   2.40947942
  0.93430000   2.10787641
  0.93430000   2.40944996
  0.93430000   2.10790156
  0.93430000   2.40942740
  0.93430000   2.10791883
  0.93430000   2.40940950
  0.93430000   2.10793110
  0.93430000   2.40939485
  0.93430000   2.10794016
  0.93430000   2.40938255
  0.93430000   2.10794709
  0.93430000   2.40937200
  0.93430000   2.10795257
  0.93430000   2.40936280
  0.93430000   2.10795703
  0.93430000   2.40935466
  0.93430000   2.10796076
  0.93430000   2.40934739
  0.93430000   2.10796394
  0.93440000   2.41123718
  0.93440000   2.10570707
  0.93440000   2.41118565
  0.93440000   2.10575870
  0.93440000   2.41114884
  0.93440000   2.10579200
  0.93440000   2.41112144
  0.93440000   2.10581417
  0.93440000   2.41110024
  0.93440000   2.10582948
  0.93440000   2.41108325
  0.93440000   2.10584045
  0.93440000   2.41106922
  0.93440000   2.10584864
  0.93440000   2.41105735
  0.93440000   2.10585497
  0.93440000   2.41104710
  0.93440000   2.10586004
  0.93440000   2.41103812
  0.93440000   2.10586421
  0.93440000   2.41103015
  0.93440000   2.10586773
  0.93440000   2.41102301
  0.93440000   2.10587074
  0.93450000   2.41287835
  0.93450000   2.10365411
  0.93450000   2.41283098
  0.93450000   2.10369965
  0.93450000   2.41279687
  0.93450000   2.10372902
  0.93450000   2.41277122
  0.93450000   2.10374864
  0.93450000   2.41275118
  0.93450000   2.10376229
  0.93450000   2.41273495
  0.93450000   2.10377218
  0.93450000   2.41272144
  0.93450000   2.10377964
  0.93450000   2.41270993
  0.93450000   2.10378548
  0.93450000   2.41269994
  0.93450000   2.10379021
  0.93450000   2.41269115
  0.93450000   2.10379413
  0.93450000   2.41268333
  0.93450000   2.10379746
  0.93450000   2.41267630
  0.93450000   2.10380034
  0.93460000   2.41449970
  0.93460000   2.10162065
  0.93460000   2.41445595
  0.93460000   2.10166089
  0.93460000   2.41442416
  0.93460000   2.10168687
  0.93460000   2.41440001
  0.93460000   2.10170434
  0.93460000   2.41438093
  0.93460000   2.10171659
  0.93460000   2.41436535
  0.93460000   2.10172558
  0.93460000   2.41435228
  0.93460000   2.10173243
  0.93460000   2.41434108
  0.93460000   2.10173786
  0.93460000   2.41433131
  0.93460000   2.10174230
  0.93460000   2.41432268
  0.93460000   2.10174601
  0.93460000   2.41431498
  0.93460000   2.10174918
  0.93460000   2.41430806
  0.93460000   2.10175193
  0.93470000   2.41610176
  0.93470000   2.09960630
  0.93470000   2.41606114
  0.93470000   2.09964192
  0.93470000   2.41603133
  0.93470000   2.09966501
  0.93470000   2.41600846
  0.93470000   2.09968065
  0.93470000   2.41599020
  0.93470000   2.09969173
  0.93470000   2.41597517
  0.93470000   2.09969995
  0.93470000   2.41596247
  0.93470000   2.09970630
  0.93470000   2.41595152
  0.93470000   2.09971138
  0.93470000   2.41594194
  0.93470000   2.09971557
  0.93470000   2.41593346
  0.93470000   2.09971910
  0.93470000   2.41592587
  0.93470000   2.09972213
  0.93470000   2.41591904
  0.93470000   2.09972477
  0.93480000   2.41768500
  0.93480000   2.09761064
  0.93480000   2.41764711
  0.93480000   2.09764228
  0.93480000   2.41761900
  0.93480000   2.09766289
  0.93480000   2.41759720
  0.93480000   2.09767697
  0.93480000   2.41757964
  0.93480000   2.09768706
  0.93480000   2.41756507
  0.93480000   2.09769464
  0.93480000   2.41755268
  0.93480000   2.09770056
  0.93480000   2.41754196
  0.93480000   2.09770534
  0.93480000   2.41753255
  0.93480000   2.09770931
  0.93480000   2.41752419
  0.93480000   2.09771269
  0.93480000   2.41751671
  0.93480000   2.09771560
  0.93480000   2.41750996
  0.93480000   2.09771814
  0.93490000   2.41924993
  0.93490000   2.09563328
  0.93490000   2.41921438
  0.93490000   2.09566147
  0.93490000   2.41918773
  0.93490000   2.09567996
  0.93490000   2.41916685
  0.93490000   2.09569271
  0.93490000   2.41914989
  0.93490000   2.09570198
  0.93490000   2.41913571
  0.93490000   2.09570901
  0.93490000   2.41912359
  0.93490000   2.09571456
  0.93490000   2.41911307
  0.93490000   2.09571910
  0.93490000   2.41910380
  0.93490000   2.09572288
  0.93490000   2.41909556
  0.93490000   2.09572612
  0.93490000   2.41908817
  0.93490000   2.09572892
  0.93490000   2.41908150
  0.93490000   2.09573137
  0.93500000   2.42079702
  0.93500000   2.09367381
  0.93500000   2.42076350
  0.93500000   2.09369902
  0.93500000   2.42073810
  0.93500000   2.09371569
  0.93500000   2.42071800
  0.93500000   2.09372734
  0.93500000   2.42070155
  0.93500000   2.09373589
  0.93500000   2.42068770
  0.93500000   2.09374246
  0.93500000   2.42067582
  0.93500000   2.09374771
  0.93500000   2.42066547
  0.93500000   2.09375202
  0.93500000   2.42065633
  0.93500000   2.09375564
  0.93500000   2.42064819
  0.93500000   2.09375875
  0.93500000   2.42064089
  0.93500000   2.09376145
  0.93500000   2.42063429
  0.93500000   2.09376382
  0.93500000   2.42079702
  0.93500000   2.09367381
  0.93500000   2.42076350
  0.93500000   2.09369902
  0.93500000   2.42073810
  0.93500000   2.09371569
  0.93500000   2.42071800
  0.93500000   2.09372734
  0.93500000   2.42070155
  0.93500000   2.09373589
  0.93500000   2.42068770
  0.93500000   2.09374246
  0.93500000   2.42067582
  0.93500000   2.09374771
  0.93500000   2.42066547
  0.93500000   2.09375202
  0.93500000   2.42065633
  0.93500000   2.09375564
  0.93500000   2.42064819
  0.93500000   2.09375875
  0.93500000   2.42064089
  0.93500000   2.09376145
  0.93500000   2.42063429
  0.93500000   2.09376382
  0.93510000   2.42232675
  0.93510000   2.09173182
  0.93510000   2.42229497
  0.93510000   2.09175446
  0.93510000   2.42227064
  0.93510000   2.09176959
  0.93510000   2.42225121
  0.93510000   2.09178028
  0.93510000   2.42223519
  0.93510000   2.09178824
  0.93510000   2.42222163
  0.93510000   2.09179442
  0.93510000   2.42220996
  0.93510000   2.09179939
  0.93510000   2.42219976
  0.93510000   2.09180351
  0.93510000   2.42219074
  0.93510000   2.09180699
  0.93510000   2.42218270
  0.93510000   2.09180999
  0.93510000   2.42217547
  0.93510000   2.09181259
  0.93510000   2.42216894
  0.93510000   2.09181488
  0.93520000   2.42383956
  0.93520000   2.08980691
  0.93520000   2.42380929
  0.93520000   2.08982734
  0.93520000   2.42378588
  0.93520000   2.08984116
  0.93520000   2.42376702
  0.93520000   2.08985104
  0.93520000   2.42375137
  0.93520000   2.08985848
  0.93520000   2.42373807
  0.93520000   2.08986432
  0.93520000   2.42372658
  0.93520000   2.08986906
  0.93520000   2.42371651
  0.93520000   2.08987301
  0.93520000   2.42370760
  0.93520000   2.08987636
  0.93520000   2.42369965
  0.93520000   2.08987926
  0.93520000   2.42369250
  0.93520000   2.08988178
  0.93520000   2.42368603
  0.93520000   2.08988400
  0.93530000   2.42533590
  0.93530000   2.08789868
  0.93530000   2.42530694
  0.93530000   2.08791722
  0.93530000   2.42528430
  0.93530000   2.08792991
  0.93530000   2.42526594
  0.93530000   2.08793910
  0.93530000   2.42525061
  0.93530000   2.08794610
  0.93530000   2.42523754
  0.93530000   2.08795165
  0.93530000   2.42522621
  0.93530000   2.08795619
  0.93530000   2.42521627
  0.93530000   2.08795998
  0.93530000   2.42520746
  0.93530000   2.08796322
  0.93530000   2.42519959
  0.93530000   2.08796602
  0.93530000   2.42519250
  0.93530000   2.08796846
  0.93530000   2.42518610
  0.93530000   2.08797061
  0.93540000   2.42681621
  0.93540000   2.08600674
  0.93540000   2.42678837
  0.93540000   2.08602366
  0.93540000   2.42676641
  0.93540000   2.08603538
  0.93540000   2.42674848
  0.93540000   2.08604399
  0.93540000   2.42673343
  0.93540000   2.08605061
  0.93540000   2.42672056
  0.93540000   2.08605590
  0.93540000   2.42670937
  0.93540000   2.08606026
  0.93540000   2.42669954
  0.93540000   2.08606391
  0.93540000   2.42669083
  0.93540000   2.08606704
  0.93540000   2.42668303
  0.93540000   2.08606975
  0.93540000   2.42667602
  0.93540000   2.08607212
  0.93540000   2.42666966
  0.93540000   2.08607421
  0.93550000   2.42828091
  0.93550000   2.08413071
  0.93550000   2.42825403
  0.93550000   2.08414623
  0.93550000   2.42823266
  0.93550000   2.08415713
  0.93550000   2.42821510
  0.93550000   2.08416523
  0.93550000   2.42820030
  0.93550000   2.08417152
  0.93550000   2.42818760
  0.93550000   2.08417659
  0.93550000   2.42817655
  0.93550000   2.08418078
  0.93550000   2.42816683
  0.93550000   2.08418431
  0.93550000   2.42815820
  0.93550000   2.08418734
  0.93550000   2.42815048
  0.93550000   2.08418997
  0.93550000   2.42814352
  0.93550000   2.08419226
  0.93550000   2.42813722
  0.93550000   2.08419430
  0.93560000   2.42973041
  0.93560000   2.08227021
  0.93560000   2.42970436
  0.93560000   2.08228453
  0.93560000   2.42968350
  0.93560000   2.08229472
  0.93560000   2.42966626
  0.93560000   2.08230238
  0.93560000   2.42965168
  0.93560000   2.08230839
  0.93560000   2.42963915
  0.93560000   2.08231325
  0.93560000   2.42962822
  0.93560000   2.08231729
  0.93560000   2.42961860
  0.93560000   2.08232071
  0.93560000   2.42961004
  0.93560000   2.08232365
  0.93560000   2.42960239
  0.93560000   2.08232620
  0.93560000   2.42959549
  0.93560000   2.08232843
  0.93560000   2.42958925
  0.93560000   2.08233040
  0.93570000   2.43116510
  0.93570000   2.08042487
  0.93570000   2.43113977
  0.93570000   2.08043816
  0.93570000   2.43111935
  0.93570000   2.08044774
  0.93570000   2.43110240
  0.93570000   2.08045502
  0.93570000   2.43108802
  0.93570000   2.08046077
  0.93570000   2.43107563
  0.93570000   2.08046546
  0.93570000   2.43106481
  0.93570000   2.08046936
  0.93570000   2.43105528
  0.93570000   2.08047267
  0.93570000   2.43104680
  0.93570000   2.08047552
  0.93570000   2.43103921
  0.93570000   2.08047800
  0.93570000   2.43103238
  0.93570000   2.08048017
  0.93570000   2.43102618
  0.93570000   2.08048209
  0.93580000   2.43258536
  0.93580000   2.07859433
  0.93580000   2.43256066
  0.93580000   2.07860673
  0.93580000   2.43254062
  0.93580000   2.07861578
  0.93580000   2.43252393
  0.93580000   2.07862272
  0.93580000   2.43250973
  0.93580000   2.07862825
  0.93580000   2.43249747
  0.93580000   2.07863277
  0.93580000   2.43248677
  0.93580000   2.07863656
  0.93580000   2.43247732
  0.93580000   2.07863977
  0.93580000   2.43246891
  0.93580000   2.07864254
  0.93580000   2.43246139
  0.93580000   2.07864494
  0.93580000   2.43245460
  0.93580000   2.07864706
  0.93580000   2.43244845
  0.93580000   2.07864893
  0.93590000   2.43399157
  0.93590000   2.07677823
  0.93590000   2.43396741
  0.93590000   2.07678987
  0.93590000   2.43394772
  0.93590000   2.07679846
  0.93590000   2.43393125
  0.93590000   2.07680511
  0.93590000   2.43391722
  0.93590000   2.07681043
  0.93590000   2.43390509
  0.93590000   2.07681481
  0.93590000   2.43389448
  0.93590000   2.07681847
  0.93590000   2.43388511
  0.93590000   2.07682159
  0.93590000   2.43387678
  0.93590000   2.07682429
  0.93590000   2.43386931
  0.93590000   2.07682663
  0.93590000   2.43386257
  0.93590000   2.07682868
  0.93590000   2.43385647
  0.93590000   2.07683050
  0.93600000   2.43538408
  0.93600000   2.07497624
  0.93600000   2.43536041
  0.93600000   2.07498722
  0.93600000   2.43534101
  0.93600000   2.07499541
  0.93600000   2.43532475
  0.93600000   2.07500179
  0.93600000   2.43531087
  0.93600000   2.07500693
  0.93600000   2.43529885
  0.93600000   2.07501117
  0.93600000   2.43528834
  0.93600000   2.07501473
  0.93600000   2.43527905
  0.93600000   2.07501776
  0.93600000   2.43527078
  0.93600000   2.07502038
  0.93600000   2.43526337
  0.93600000   2.07502266
  0.93600000   2.43525669
  0.93600000   2.07502466
  0.93600000   2.43525063
  0.93600000   2.07502644
  0.93610000   2.43676325
  0.93610000   2.07318802
  0.93610000   2.43673999
  0.93610000   2.07319842
  0.93610000   2.43672087
  0.93610000   2.07320626
  0.93610000   2.43670480
  0.93610000   2.07321241
  0.93610000   2.43669105
  0.93610000   2.07321738
  0.93610000   2.43667915
  0.93610000   2.07322149
  0.93610000   2.43666872
  0.93610000   2.07322495
  0.93610000   2.43665951
  0.93610000   2.07322790
  0.93610000   2.43665130
  0.93610000   2.07323045
  0.93610000   2.43664394
  0.93610000   2.07323267
  0.93610000   2.43663731
  0.93610000   2.07323462
  0.93610000   2.43663129
  0.93610000   2.07323635
  0.93620000   2.43812940
  0.93620000   2.07141326
  0.93620000   2.43810652
  0.93620000   2.07142315
  0.93620000   2.43808764
  0.93620000   2.07143068
  0.93620000   2.43807174
  0.93620000   2.07143661
  0.93620000   2.43805812
  0.93620000   2.07144143
  0.93620000   2.43804632
  0.93620000   2.07144542
  0.93620000   2.43803598
  0.93620000   2.07144878
  0.93620000   2.43802683
  0.93620000   2.07145166
  0.93620000   2.43801869
  0.93620000   2.07145414
  0.93620000   2.43801138
  0.93620000   2.07145630
  0.93620000   2.43800480
  0.93620000   2.07145820
  0.93620000   2.43799882
  0.93620000   2.07145989
  0.93630000   2.43948286
  0.93630000   2.06965163
  0.93630000   2.43946031
  0.93630000   2.06966108
  0.93630000   2.43944166
  0.93630000   2.06966832
  0.93630000   2.43942591
  0.93630000   2.06967406
  0.93630000   2.43941242
  0.93630000   2.06967874
  0.93630000   2.43940072
  0.93630000   2.06968262
  0.93630000   2.43939045
  0.93630000   2.06968589
  0.93630000   2.43938138
  0.93630000   2.06968869
  0.93630000   2.43937329
  0.93630000   2.06969111
  0.93630000   2.43936604
  0.93630000   2.06969322
  0.93630000   2.43935950
  0.93630000   2.06969507
  0.93630000   2.43935356
  0.93630000   2.06969671
  0.93640000   2.44082395
  0.93640000   2.06790283
  0.93640000   2.44080170
  0.93640000   2.06791189
  0.93640000   2.44078325
  0.93640000   2.06791888
  0.93640000   2.44076765
  0.93640000   2.06792444
  0.93640000   2.44075427
  0.93640000   2.06792898
  0.93640000   2.44074266
  0.93640000   2.06793276
  0.93640000   2.44073248
  0.93640000   2.06793594
  0.93640000   2.44072347
  0.93640000   2.06793867
  0.93640000   2.44071543
  0.93640000   2.06794103
  0.93640000   2.44070823
  0.93640000   2.06794308
  0.93640000   2.44070173
  0.93640000   2.06794489
  0.93640000   2.44069583
  0.93640000   2.06794650
  0.93650000   2.44215296
  0.93650000   2.06616656
  0.93650000   2.44213098
  0.93650000   2.06617528
  0.93650000   2.44211271
  0.93650000   2.06618204
  0.93650000   2.44209726
  0.93650000   2.06618744
  0.93650000   2.44208399
  0.93650000   2.06619185
  0.93650000   2.44207247
  0.93650000   2.06619553
  0.93650000   2.44206235
  0.93650000   2.06619864
  0.93650000   2.44205341
  0.93650000   2.06620129
  0.93650000   2.44204543
  0.93650000   2.06620359
  0.93650000   2.44203828
  0.93650000   2.06620560
  0.93650000   2.44203182
  0.93650000   2.06620736
  0.93650000   2.44202596
  0.93650000   2.06620893
  0.93660000   2.44347019
  0.93660000   2.06444256
  0.93660000   2.44344845
  0.93660000   2.06445096
  0.93660000   2.44343036
  0.93660000   2.06445751
  0.93660000   2.44341504
  0.93660000   2.06446275
  0.93660000   2.44340187
  0.93660000   2.06446705
  0.93660000   2.44339043
  0.93660000   2.06447063
  0.93660000   2.44338039
  0.93660000   2.06447366
  0.93660000   2.44337151
  0.93660000   2.06447625
  0.93660000   2.44336359
  0.93660000   2.06447849
  0.93660000   2.44335647
  0.93660000   2.06448045
  0.93660000   2.44335006
  0.93660000   2.06448218
  0.93660000   2.44334423
  0.93660000   2.06448370
  0.93670000   2.44477591
  0.93670000   2.06273053
  0.93670000   2.44475441
  0.93670000   2.06273865
  0.93670000   2.44473648
  0.93670000   2.06274500
  0.93670000   2.44472128
  0.93670000   2.06275010
  0.93670000   2.44470821
  0.93670000   2.06275429
  0.93670000   2.44469685
  0.93670000   2.06275778
  0.93670000   2.44468688
  0.93670000   2.06276073
  0.93670000   2.44467805
  0.93670000   2.06276326
  0.93670000   2.44467018
  0.93670000   2.06276545
  0.93670000   2.44466311
  0.93670000   2.06276736
  0.93670000   2.44465674
  0.93670000   2.06276904
  0.93670000   2.44465095
  0.93670000   2.06277054
  0.93680000   2.44607040
  0.93680000   2.06103021
  0.93680000   2.44604911
  0.93680000   2.06103807
  0.93680000   2.44603133
  0.93680000   2.06104424
  0.93680000   2.44601625
  0.93680000   2.06104921
  0.93680000   2.44600328
  0.93680000   2.06105329
  0.93680000   2.44599200
  0.93680000   2.06105669
  0.93680000   2.44598209
  0.93680000   2.06105957
  0.93680000   2.44597332
  0.93680000   2.06106204
  0.93680000   2.44596550
  0.93680000   2.06106418
  0.93680000   2.44595848
  0.93680000   2.06106605
  0.93680000   2.44595214
  0.93680000   2.06106769
  0.93680000   2.44594638
  0.93680000   2.06106915
  0.93690000   2.44735393
  0.93690000   2.05934134
  0.93690000   2.44733283
  0.93690000   2.05934897
  0.93690000   2.44731519
  0.93690000   2.05935497
  0.93690000   2.44730023
  0.93690000   2.05935981
  0.93690000   2.44728735
  0.93690000   2.05936378
  0.93690000   2.44727614
  0.93690000   2.05936711
  0.93690000   2.44726630
  0.93690000   2.05936992
  0.93690000   2.44725759
  0.93690000   2.05937233
  0.93690000   2.44724981
  0.93690000   2.05937442
  0.93690000   2.44724283
  0.93690000   2.05937624
  0.93690000   2.44723653
  0.93690000   2.05937785
  0.93690000   2.44723081
  0.93690000   2.05937927
  0.93700000   2.44862674
  0.93700000   2.05766367
  0.93700000   2.44860582
  0.93700000   2.05767109
  0.93700000   2.44858832
  0.93700000   2.05767693
  0.93700000   2.44857346
  0.93700000   2.05768164
  0.93700000   2.44856067
  0.93700000   2.05768553
  0.93700000   2.44854954
  0.93700000   2.05768877
  0.93700000   2.44853976
  0.93700000   2.05769151
  0.93700000   2.44853110
  0.93700000   2.05769387
  0.93700000   2.44852337
  0.93700000   2.05769591
  0.93700000   2.44851643
  0.93700000   2.05769769
  0.93700000   2.44851016
  0.93700000   2.05769926
  0.93700000   2.44850447
  0.93700000   2.05770065
  0.93710000   2.44988907
  0.93710000   2.05599697
  0.93710000   2.44986832
  0.93710000   2.05600418
  0.93710000   2.44985096
  0.93710000   2.05600987
  0.93710000   2.44983620
  0.93710000   2.05601447
  0.93710000   2.44982350
  0.93710000   2.05601826
  0.93710000   2.44981244
  0.93710000   2.05602143
  0.93710000   2.44980272
  0.93710000   2.05602411
  0.93710000   2.44979411
  0.93710000   2.05602641
  0.93710000   2.44978643
  0.93710000   2.05602840
  0.93710000   2.44977953
  0.93710000   2.05603015
  0.93710000   2.44977329
  0.93710000   2.05603168
  0.93710000   2.44976764
  0.93710000   2.05603304
  0.93720000   2.45114117
  0.93720000   2.05434100
  0.93720000   2.45112058
  0.93720000   2.05434802
  0.93720000   2.45110335
  0.93720000   2.05435357
  0.93720000   2.45108869
  0.93720000   2.05435806
  0.93720000   2.45107607
  0.93720000   2.05436175
  0.93720000   2.45106508
  0.93720000   2.05436485
  0.93720000   2.45105542
  0.93720000   2.05436747
  0.93720000   2.45104686
  0.93720000   2.05436972
  0.93720000   2.45103922
  0.93720000   2.05437167
  0.93720000   2.45103235
  0.93720000   2.05437337
  0.93720000   2.45102616
  0.93720000   2.05437487
  0.93720000   2.45102053
  0.93720000   2.05437620
  0.93730000   2.45238325
  0.93730000   2.05269553
  0.93730000   2.45236283
  0.93730000   2.05270237
  0.93730000   2.45234571
  0.93730000   2.05270779
  0.93730000   2.45233115
  0.93730000   2.05271217
  0.93730000   2.45231861
  0.93730000   2.05271578
  0.93730000   2.45230768
  0.93730000   2.05271880
  0.93730000   2.45229808
  0.93730000   2.05272137
  0.93730000   2.45228957
  0.93730000   2.05272356
  0.93730000   2.45228197
  0.93730000   2.05272547
  0.93730000   2.45227515
  0.93730000   2.05272713
  0.93730000   2.45226898
  0.93730000   2.05272860
  0.93730000   2.45226338
  0.93730000   2.05272990
  0.93740000   2.45361555
  0.93740000   2.05106035
  0.93740000   2.45359527
  0.93740000   2.05106702
  0.93740000   2.45357827
  0.93740000   2.05107230
  0.93740000   2.45356381
  0.93740000   2.05107659
  0.93740000   2.45355134
  0.93740000   2.05108011
  0.93740000   2.45354048
  0.93740000   2.05108307
  0.93740000   2.45353093
  0.93740000   2.05108558
  0.93740000   2.45352247
  0.93740000   2.05108772
  0.93740000   2.45351491
  0.93740000   2.05108959
  0.93740000   2.45350813
  0.93740000   2.05109121
  0.93740000   2.45350199
  0.93740000   2.05109265
  0.93740000   2.45349642
  0.93740000   2.05109392
  0.93750000   2.45483827
  0.93750000   2.04943525
  0.93750000   2.45481813
  0.93750000   2.04944175
  0.93750000   2.45480125
  0.93750000   2.04944691
  0.93750000   2.45478687
  0.93750000   2.04945110
  0.93750000   2.45477448
  0.93750000   2.04945455
  0.93750000   2.45476368
  0.93750000   2.04945743
  0.93750000   2.45475419
  0.93750000   2.04945988
  0.93750000   2.45474577
  0.93750000   2.04946199
  0.93750000   2.45473826
  0.93750000   2.04946381
  0.93750000   2.45473151
  0.93750000   2.04946540
  0.93750000   2.45472540
  0.93750000   2.04946680
  0.93750000   2.45471986
  0.93750000   2.04946805
  0.93760000   2.45605162
  0.93760000   2.04782001
  0.93760000   2.45603162
  0.93760000   2.04782637
  0.93760000   2.45601484
  0.93760000   2.04783141
  0.93760000   2.45600056
  0.93760000   2.04783549
  0.93760000   2.45598824
  0.93760000   2.04783887
  0.93760000   2.45597750
  0.93760000   2.04784169
  0.93760000   2.45596806
  0.93760000   2.04784409
  0.93760000   2.45595969
  0.93760000   2.04784615
  0.93760000   2.45595221
  0.93760000   2.04784793
  0.93760000   2.45594549
  0.93760000   2.04784949
  0.93760000   2.45593942
  0.93760000   2.04785086
  0.93760000   2.45593391
  0.93760000   2.04785208
  0.93770000   2.45725579
  0.93770000   2.04621446
  0.93770000   2.45723593
  0.93770000   2.04622066
  0.93770000   2.45721926
  0.93770000   2.04622559
  0.93770000   2.45720505
  0.93770000   2.04622959
  0.93770000   2.45719280
  0.93770000   2.04623288
  0.93770000   2.45718213
  0.93770000   2.04623565
  0.93770000   2.45717274
  0.93770000   2.04623799
  0.93770000   2.45716441
  0.93770000   2.04624000
  0.93770000   2.45715697
  0.93770000   2.04624175
  0.93770000   2.45715029
  0.93770000   2.04624327
  0.93770000   2.45714425
  0.93770000   2.04624462
  0.93770000   2.45713876
  0.93770000   2.04624581
  0.93780000   2.45845099
  0.93780000   2.04461838
  0.93780000   2.45843125
  0.93780000   2.04462445
  0.93780000   2.45841468
  0.93780000   2.04462926
  0.93780000   2.45840056
  0.93780000   2.04463317
  0.93780000   2.45838838
  0.93780000   2.04463640
  0.93780000   2.45837776
  0.93780000   2.04463910
  0.93780000   2.45836842
  0.93780000   2.04464140
  0.93780000   2.45836014
  0.93780000   2.04464337
  0.93780000   2.45835273
  0.93780000   2.04464508
  0.93780000   2.45834608
  0.93780000   2.04464657
  0.93780000   2.45834007
  0.93780000   2.04464788
  0.93780000   2.45833461
  0.93780000   2.04464905
  0.93790000   2.45963738
  0.93790000   2.04303161
  0.93790000   2.45961777
  0.93790000   2.04303754
  0.93790000   2.45960130
  0.93790000   2.04304225
  0.93790000   2.45958726
  0.93790000   2.04304608
  0.93790000   2.45957515
  0.93790000   2.04304923
  0.93790000   2.45956459
  0.93790000   2.04305188
  0.93790000   2.45955529
  0.93790000   2.04305413
  0.93790000   2.45954705
  0.93790000   2.04305605
  0.93790000   2.45953969
  0.93790000   2.04305773
  0.93790000   2.45953307
  0.93790000   2.04305919
  0.93790000   2.45952708
  0.93790000   2.04306047
  0.93790000   2.45952165
  0.93790000   2.04306162
  0.93800000   2.46081516
  0.93800000   2.04145397
  0.93800000   2.46079567
  0.93800000   2.04145976
  0.93800000   2.46077930
  0.93800000   2.04146437
  0.93800000   2.46076533
  0.93800000   2.04146811
  0.93800000   2.46075329
  0.93800000   2.04147120
  0.93800000   2.46074278
  0.93800000   2.04147379
  0.93800000   2.46073354
  0.93800000   2.04147599
  0.93800000   2.46072533
  0.93800000   2.04147788
  0.93800000   2.46071800
  0.93800000   2.04147952
  0.93800000   2.46071142
  0.93800000   2.04148095
  0.93800000   2.46070546
  0.93800000   2.04148221
  0.93800000   2.46070005
  0.93800000   2.04148333
  0.93810000   2.46198450
  0.93810000   2.03988527
  0.93810000   2.46196513
  0.93810000   2.03989094
  0.93810000   2.46194884
  0.93810000   2.03989545
  0.93810000   2.46193496
  0.93810000   2.03989911
  0.93810000   2.46192298
  0.93810000   2.03990213
  0.93810000   2.46191252
  0.93810000   2.03990467
  0.93810000   2.46190332
  0.93810000   2.03990682
  0.93810000   2.46189516
  0.93810000   2.03990867
  0.93810000   2.46188787
  0.93810000   2.03991028
  0.93810000   2.46188131
  0.93810000   2.03991168
  0.93810000   2.46187538
  0.93810000   2.03991291
  0.93810000   2.46187000
  0.93810000   2.03991401
  0.93820000   2.46314556
  0.93820000   2.03832536
  0.93820000   2.46312630
  0.93820000   2.03833090
  0.93820000   2.46311011
  0.93820000   2.03833531
  0.93820000   2.46309630
  0.93820000   2.03833890
  0.93820000   2.46308438
  0.93820000   2.03834186
  0.93820000   2.46307398
  0.93820000   2.03834434
  0.93820000   2.46306483
  0.93820000   2.03834645
  0.93820000   2.46305670
  0.93820000   2.03834827
  0.93820000   2.46304944
  0.93820000   2.03834984
  0.93820000   2.46304292
  0.93820000   2.03835121
  0.93820000   2.46303702
  0.93820000   2.03835242
  0.93820000   2.46303165
  0.93820000   2.03835349
  0.93830000   2.46429852
  0.93830000   2.03677406
  0.93830000   2.46427937
  0.93830000   2.03677949
  0.93830000   2.46426327
  0.93830000   2.03678381
  0.93830000   2.46424953
  0.93830000   2.03678732
  0.93830000   2.46423767
  0.93830000   2.03679022
  0.93830000   2.46422732
  0.93830000   2.03679265
  0.93830000   2.46421821
  0.93830000   2.03679472
  0.93830000   2.46421012
  0.93830000   2.03679650
  0.93830000   2.46420290
  0.93830000   2.03679803
  0.93830000   2.46419640
  0.93830000   2.03679938
  0.93830000   2.46419052
  0.93830000   2.03680056
  0.93830000   2.46418518
  0.93830000   2.03680161
  0.93840000   2.46544352
  0.93840000   2.03523123
  0.93840000   2.46542448
  0.93840000   2.03523654
  0.93840000   2.46540846
  0.93840000   2.03524078
  0.93840000   2.46539480
  0.93840000   2.03524421
  0.93840000   2.46538299
  0.93840000   2.03524706
  0.93840000   2.46537269
  0.93840000   2.03524944
  0.93840000   2.46536362
  0.93840000   2.03525146
  0.93840000   2.46535558
  0.93840000   2.03525320
  0.93840000   2.46534838
  0.93840000   2.03525471
  0.93840000   2.46534191
  0.93840000   2.03525603
  0.93840000   2.46533607
  0.93840000   2.03525719
  0.93840000   2.46533075
  0.93840000   2.03525822
  0.93850000   2.46658072
  0.93850000   2.03369672
  0.93850000   2.46656178
  0.93850000   2.03370192
  0.93850000   2.46654585
  0.93850000   2.03370606
  0.93850000   2.46653226
  0.93850000   2.03370943
  0.93850000   2.46652051
  0.93850000   2.03371222
  0.93850000   2.46651026
  0.93850000   2.03371455
  0.93850000   2.46650123
  0.93850000   2.03371654
  0.93850000   2.46649322
  0.93850000   2.03371824
  0.93850000   2.46648606
  0.93850000   2.03371971
  0.93850000   2.46647962
  0.93850000   2.03372101
  0.93850000   2.46647380
  0.93850000   2.03372214
  0.93850000   2.46646850
  0.93850000   2.03372315
  0.93860000   2.46771027
  0.93860000   2.03217037
  0.93860000   2.46769144
  0.93860000   2.03217546
  0.93860000   2.46767559
  0.93860000   2.03217952
  0.93860000   2.46766206
  0.93860000   2.03218282
  0.93860000   2.46765037
  0.93860000   2.03218555
  0.93860000   2.46764017
  0.93860000   2.03218784
  0.93860000   2.46763118
  0.93860000   2.03218978
  0.93860000   2.46762320
  0.93860000   2.03219145
  0.93860000   2.46761607
  0.93860000   2.03219290
  0.93860000   2.46760966
  0.93860000   2.03219416
  0.93860000   2.46760386
  0.93860000   2.03219528
  0.93860000   2.46759859
  0.93860000   2.03219627
  0.93870000   2.46883231
  0.93870000   2.03065204
  0.93870000   2.46881358
  0.93870000   2.03065703
  0.93870000   2.46879781
  0.93870000   2.03066100
  0.93870000   2.46878435
  0.93870000   2.03066424
  0.93870000   2.46877271
  0.93870000   2.03066691
  0.93870000   2.46876256
  0.93870000   2.03066915
  0.93870000   2.46875361
  0.93870000   2.03067106
  0.93870000   2.46874567
  0.93870000   2.03067270
  0.93870000   2.46873857
  0.93870000   2.03067412
  0.93870000   2.46873219
  0.93870000   2.03067536
  0.93870000   2.46872641
  0.93870000   2.03067645
  0.93870000   2.46872116
  0.93870000   2.03067742
  0.93880000   2.46994699
  0.93880000   2.02914159
  0.93880000   2.46992835
  0.93880000   2.02914648
  0.93880000   2.46991267
  0.93880000   2.02915038
  0.93880000   2.46989927
  0.93880000   2.02915355
  0.93880000   2.46988769
  0.93880000   2.02915617
  0.93880000   2.46987758
  0.93880000   2.02915837
  0.93880000   2.46986867
  0.93880000   2.02916024
  0.93880000   2.46986076
  0.93880000   2.02916184
  0.93880000   2.46985370
  0.93880000   2.02916323
  0.93880000   2.46984734
  0.93880000   2.02916445
  0.93880000   2.46984158
  0.93880000   2.02916552
  0.93880000   2.46983635
  0.93880000   2.02916647
  0.93890000   2.47105444
  0.93890000   2.02763889
  0.93890000   2.47103590
  0.93890000   2.02764368
  0.93890000   2.47102028
  0.93890000   2.02764750
  0.93890000   2.47100695
  0.93890000   2.02765061
  0.93890000   2.47099542
  0.93890000   2.02765318
  0.93890000   2.47098536
  0.93890000   2.02765534
  0.93890000   2.47097649
  0.93890000   2.02765717
  0.93890000   2.47096862
  0.93890000   2.02765874
  0.93890000   2.47096158
  0.93890000   2.02766011
  0.93890000   2.47095524
  0.93890000   2.02766130
  0.93890000   2.47094951
  0.93890000   2.02766235
  0.93890000   2.47094431
  0.93890000   2.02766328
  0.93900000   2.47215478
  0.93900000   2.02614381
  0.93900000   2.47213634
  0.93900000   2.02614851
  0.93900000   2.47212080
  0.93900000   2.02615225
  0.93900000   2.47210753
  0.93900000   2.02615530
  0.93900000   2.47209606
  0.93900000   2.02615782
  0.93900000   2.47208603
  0.93900000   2.02615993
  0.93900000   2.47207720
  0.93900000   2.02616173
  0.93900000   2.47206936
  0.93900000   2.02616327
  0.93900000   2.47206235
  0.93900000   2.02616461
  0.93900000   2.47205604
  0.93900000   2.02616578
  0.93900000   2.47205034
  0.93900000   2.02616681
  0.93900000   2.47204515
  0.93900000   2.02616772
  0.93910000   2.47324816
  0.93910000   2.02465622
  0.93910000   2.47322981
  0.93910000   2.02466082
  0.93910000   2.47321435
  0.93910000   2.02466450
  0.93910000   2.47320113
  0.93910000   2.02466748
  0.93910000   2.47318971
  0.93910000   2.02466995
  0.93910000   2.47317973
  0.93910000   2.02467203
  0.93910000   2.47317094
  0.93910000   2.02467379
  0.93910000   2.47316313
  0.93910000   2.02467530
  0.93910000   2.47315615
  0.93910000   2.02467662
  0.93910000   2.47314986
  0.93910000   2.02467776
  0.93910000   2.47314418
  0.93910000   2.02467877
  0.93910000   2.47313901
  0.93910000   2.02467967
  0.93920000   2.47433470
  0.93920000   2.02317600
  0.93920000   2.47431643
  0.93920000   2.02318051
  0.93920000   2.47430104
  0.93920000   2.02318411
  0.93920000   2.47428789
  0.93920000   2.02318704
  0.93920000   2.47427651
  0.93920000   2.02318947
  0.93920000   2.47426658
  0.93920000   2.02319150
  0.93920000   2.47425782
  0.93920000   2.02319323
  0.93920000   2.47425004
  0.93920000   2.02319471
  0.93920000   2.47424309
  0.93920000   2.02319600
  0.93920000   2.47423683
  0.93920000   2.02319713
  0.93920000   2.47423117
  0.93920000   2.02319811
  0.93920000   2.47422602
  0.93920000   2.02319899
  0.93930000   2.47541451
  0.93930000   2.02170302
  0.93930000   2.47539633
  0.93930000   2.02170744
  0.93930000   2.47538101
  0.93930000   2.02171098
  0.93930000   2.47536791
  0.93930000   2.02171385
  0.93930000   2.47535659
  0.93930000   2.02171623
  0.93930000   2.47534669
  0.93930000   2.02171823
  0.93930000   2.47533797
  0.93930000   2.02171992
  0.93930000   2.47533023
  0.93930000   2.02172138
  0.93930000   2.47532330
  0.93930000   2.02172264
  0.93930000   2.47531706
  0.93930000   2.02172375
  0.93930000   2.47531142
  0.93930000   2.02172472
  0.93930000   2.47530630
  0.93930000   2.02172558
  0.93940000   2.47648771
  0.93940000   2.02023717
  0.93940000   2.47646962
  0.93940000   2.02024151
  0.93940000   2.47645436
  0.93940000   2.02024498
  0.93940000   2.47644133
  0.93940000   2.02024780
  0.93940000   2.47643005
  0.93940000   2.02025014
  0.93940000   2.47642020
  0.93940000   2.02025209
  0.93940000   2.47641151
  0.93940000   2.02025376
  0.93940000   2.47640379
  0.93940000   2.02025518
  0.93940000   2.47639689
  0.93940000   2.02025642
  0.93940000   2.47639068
  0.93940000   2.02025751
  0.93940000   2.47638506
  0.93940000   2.02025846
  0.93940000   2.47637996
  0.93940000   2.02025930
  0.93950000   2.47755442
  0.93950000   2.01877834
  0.93950000   2.47753641
  0.93950000   2.01878260
  0.93950000   2.47752123
  0.93950000   2.01878600
  0.93950000   2.47750824
  0.93950000   2.01878877
  0.93950000   2.47749702
  0.93950000   2.01879106
  0.93950000   2.47748720
  0.93950000   2.01879298
  0.93950000   2.47747855
  0.93950000   2.01879462
  0.93950000   2.47747086
  0.93950000   2.01879602
  0.93950000   2.47746399
  0.93950000   2.01879723
  0.93950000   2.47745780
  0.93950000   2.01879829
  0.93950000   2.47745220
  0.93950000   2.01879923
  0.93950000   2.47744711
  0.93950000   2.01880006
  0.93960000   2.47861475
  0.93960000   2.01732642
  0.93960000   2.47859682
  0.93960000   2.01733060
  0.93960000   2.47858171
  0.93960000   2.01733393
  0.93960000   2.47856878
  0.93960000   2.01733665
  0.93960000   2.47855759
  0.93960000   2.01733890
  0.93960000   2.47854782
  0.93960000   2.01734079
  0.93960000   2.47853920
  0.93960000   2.01734239
  0.93960000   2.47853155
  0.93960000   2.01734376
  0.93960000   2.47852470
  0.93960000   2.01734495
  0.93960000   2.47851853
  0.93960000   2.01734600
  0.93960000   2.47851296
  0.93960000   2.01734691
  0.93960000   2.47850788
  0.93960000   2.01734772
  0.93970000   2.47966881
  0.93970000   2.01588129
  0.93970000   2.47965096
  0.93970000   2.01588540
  0.93970000   2.47963591
  0.93970000   2.01588867
  0.93970000   2.47962304
  0.93970000   2.01589134
  0.93970000   2.47961190
  0.93970000   2.01589354
  0.93970000   2.47960216
  0.93970000   2.01589539
  0.93970000   2.47959358
  0.93970000   2.01589697
  0.93970000   2.47958595
  0.93970000   2.01589832
  0.93970000   2.47957913
  0.93970000   2.01589949
  0.93970000   2.47957299
  0.93970000   2.01590051
  0.93970000   2.47956743
  0.93970000   2.01590141
  0.93970000   2.47956237
  0.93970000   2.01590220
  0.93980000   2.48071670
  0.93980000   2.01444286
  0.93980000   2.48069893
  0.93980000   2.01444689
  0.93980000   2.48068395
  0.93980000   2.01445011
  0.93980000   2.48067113
  0.93980000   2.01445272
  0.93980000   2.48066003
  0.93980000   2.01445489
  0.93980000   2.48065033
  0.93980000   2.01445671
  0.93980000   2.48064178
  0.93980000   2.01445825
  0.93980000   2.48063418
  0.93980000   2.01445957
  0.93980000   2.48062739
  0.93980000   2.01446072
  0.93980000   2.48062127
  0.93980000   2.01446172
  0.93980000   2.48061573
  0.93980000   2.01446260
  0.93980000   2.48061069
  0.93980000   2.01446339
  0.93990000   2.48175853
  0.93990000   2.01301103
  0.93990000   2.48174084
  0.93990000   2.01301498
  0.93990000   2.48172592
  0.93990000   2.01301813
  0.93990000   2.48171315
  0.93990000   2.01302070
  0.93990000   2.48170210
  0.93990000   2.01302283
  0.93990000   2.48169244
  0.93990000   2.01302461
  0.93990000   2.48168392
  0.93990000   2.01302613
  0.93990000   2.48167635
  0.93990000   2.01302743
  0.93990000   2.48166957
  0.93990000   2.01302856
  0.93990000   2.48166347
  0.93990000   2.01302954
  0.93990000   2.48165796
  0.93990000   2.01303041
  0.93990000   2.48165294
  0.93990000   2.01303117
  0.94000000   2.48279440
  0.94000000   2.01158568
  0.94000000   2.48277679
  0.94000000   2.01158956
  0.94000000   2.48276192
  0.94000000   2.01159266
  0.94000000   2.48274921
  0.94000000   2.01159519
  0.94000000   2.48273820
  0.94000000   2.01159727
  0.94000000   2.48272857
  0.94000000   2.01159902
  0.94000000   2.48272009
  0.94000000   2.01160051
  0.94000000   2.48271254
  0.94000000   2.01160179
  0.94000000   2.48270579
  0.94000000   2.01160289
  0.94000000   2.48269972
  0.94000000   2.01160386
  0.94000000   2.48269422
  0.94000000   2.01160471
  0.94000000   2.48268922
  0.94000000   2.01160546
  0.94010000   2.48382440
  0.94010000   2.01016674
  0.94010000   2.48380686
  0.94010000   2.01017055
  0.94010000   2.48379206
  0.94010000   2.01017359
  0.94010000   2.48377939
  0.94010000   2.01017607
  0.94010000   2.48376843
  0.94010000   2.01017812
  0.94010000   2.48375884
  0.94010000   2.01017984
  0.94010000   2.48375038
  0.94010000   2.01018130
  0.94010000   2.48374287
  0.94010000   2.01018255
  0.94010000   2.48373614
  0.94010000   2.01018364
  0.94010000   2.48373009
  0.94010000   2.01018458
  0.94010000   2.48372461
  0.94010000   2.01018542
  0.94010000   2.48371962
  0.94010000   2.01018616
  0.94020000   2.48484863
  0.94020000   2.00875410
  0.94020000   2.48483117
  0.94020000   2.00875784
  0.94020000   2.48481643
  0.94020000   2.00876082
  0.94020000   2.48480381
  0.94020000   2.00876326
  0.94020000   2.48479289
  0.94020000   2.00876527
  0.94020000   2.48478333
  0.94020000   2.00876696
  0.94020000   2.48477490
  0.94020000   2.00876839
  0.94020000   2.48476742
  0.94020000   2.00876962
  0.94020000   2.48476071
  0.94020000   2.00877069
  0.94020000   2.48475468
  0.94020000   2.00877162
  0.94020000   2.48474922
  0.94020000   2.00877244
  0.94020000   2.48474425
  0.94020000   2.00877316
  0.94030000   2.48586719
  0.94030000   2.00734766
  0.94030000   2.48584980
  0.94030000   2.00735134
  0.94030000   2.48583511
  0.94030000   2.00735427
  0.94030000   2.48582254
  0.94030000   2.00735666
  0.94030000   2.48581166
  0.94030000   2.00735864
  0.94030000   2.48580214
  0.94030000   2.00736030
  0.94030000   2.48579375
  0.94030000   2.00736171
  0.94030000   2.48578628
  0.94030000   2.00736291
  0.94030000   2.48577961
  0.94030000   2.00736396
  0.94030000   2.48577359
  0.94030000   2.00736487
  0.94030000   2.48576815
  0.94030000   2.00736568
  0.94030000   2.48576320
  0.94030000   2.00736639
  0.94040000   2.48688016
  0.94040000   2.00594735
  0.94040000   2.48686284
  0.94040000   2.00595096
  0.94040000   2.48684821
  0.94040000   2.00595385
  0.94040000   2.48683569
  0.94040000   2.00595619
  0.94040000   2.48682485
  0.94040000   2.00595814
  0.94040000   2.48681536
  0.94040000   2.00595976
  0.94040000   2.48680700
  0.94040000   2.00596115
  0.94040000   2.48679956
  0.94040000   2.00596233
  0.94040000   2.48679291
  0.94040000   2.00596336
  0.94040000   2.48678691
  0.94040000   2.00596426
  0.94040000   2.48678149
  0.94040000   2.00596505
  0.94040000   2.48677655
  0.94040000   2.00596574
  0.94050000   2.48788763
  0.94050000   2.00455308
  0.94050000   2.48787038
  0.94050000   2.00455662
  0.94050000   2.48785581
  0.94050000   2.00455946
  0.94050000   2.48784334
  0.94050000   2.00456176
  0.94050000   2.48783253
  0.94050000   2.00456367
  0.94050000   2.48782308
  0.94050000   2.00456527
  0.94050000   2.48781475
  0.94050000   2.00456663
  0.94050000   2.48780734
  0.94050000   2.00456779
  0.94050000   2.48780070
  0.94050000   2.00456880
  0.94050000   2.48779473
  0.94050000   2.00456968
  0.94050000   2.48778932
  0.94050000   2.00457046
  0.94050000   2.48778440
  0.94060000   2.48888969
  0.94060000   2.00316475
  0.94060000   2.48887251
  0.94060000   2.00316824
  0.94060000   2.48885799
  0.94060000   2.00317102
  0.94060000   2.48884557
  0.94060000   2.00317328
  0.94060000   2.48883480
  0.94060000   2.00317516
  0.94060000   2.48882539
  0.94060000   2.00317673
  0.94060000   2.48881708
  0.94060000   2.00317806
  0.94060000   2.48880969
  0.94060000   2.00317921
  0.94060000   2.48880308
  0.94060000   2.00318020
  0.94060000   2.48879713
  0.94060000   2.00318106
  0.94060000   2.48879174
  0.94060000   2.00318182
  0.94060000   2.48878684
  0.94070000   2.48988642
  0.94070000   2.00178229
  0.94070000   2.48986931
  0.94070000   2.00178572
  0.94070000   2.48985485
  0.94070000   2.00178845
  0.94070000   2.48984247
  0.94070000   2.00179068
  0.94070000   2.48983174
  0.94070000   2.00179252
  0.94070000   2.48982236
  0.94070000   2.00179406
  0.94070000   2.48981408
  0.94070000   2.00179537
  0.94070000   2.48980672
  0.94070000   2.00179650
  0.94070000   2.48980013
  0.94070000   2.00179747
  0.94070000   2.48979420
  0.94070000   2.00179832
  0.94070000   2.48978882
  0.94070000   2.00179906
  0.94070000   2.48978394
  0.94080000   2.49087791
  0.94080000   2.00040562
  0.94080000   2.49086086
  0.94080000   2.00040898
  0.94080000   2.49084646
  0.94080000   2.00041167
  0.94080000   2.49083412
  0.94080000   2.00041386
  0.94080000   2.49082343
  0.94080000   2.00041567
  0.94080000   2.49081408
  0.94080000   2.00041719
  0.94080000   2.49080583
  0.94080000   2.00041847
  0.94080000   2.49079850
  0.94080000   2.00041958
  0.94080000   2.49079193
  0.94080000   2.00042053
  0.94080000   2.49078601
  0.94080000   2.00042137
  0.94080000   2.49078066
  0.94080000   2.00042210
  0.94080000   2.49077579
  0.94090000   2.49186423
  0.94090000   1.99903465
  0.94090000   2.49184725
  0.94090000   1.99903796
  0.94090000   2.49183290
  0.94090000   1.99904060
  0.94090000   2.49182061
  0.94090000   1.99904275
  0.94090000   2.49180996
  0.94090000   1.99904453
  0.94090000   2.49180064
  0.94090000   1.99904602
  0.94090000   2.49179242
  0.94090000   1.99904729
  0.94090000   2.49178510
  0.94090000   1.99904837
  0.94090000   2.49177856
  0.94090000   1.99904931
  0.94090000   2.49177266
  0.94090000   1.99905013
  0.94090000   2.49176732
  0.94090000   1.99905084
  0.94090000   2.49176247
  0.94100000   2.49284547
  0.94100000   1.99766932
  0.94100000   2.49282855
  0.94100000   1.99767257
  0.94100000   2.49281425
  0.94100000   1.99767516
  0.94100000   2.49280201
  0.94100000   1.99767728
  0.94100000   2.49279139
  0.94100000   1.99767902
  0.94100000   2.49278211
  0.94100000   1.99768049
  0.94100000   2.49277391
  0.94100000   1.99768173
  0.94100000   2.49276662
  0.94100000   1.99768279
  0.94100000   2.49276009
  0.94100000   1.99768371
  0.94100000   2.49275422
  0.94100000   1.99768452
  0.94100000   2.49274890
  0.94100000   1.99768523
  0.94100000   2.49274405
  0.94110000   2.49382169
  0.94110000   1.99630954
  0.94110000   2.49380484
  0.94110000   1.99631273
  0.94110000   2.49379060
  0.94110000   1.99631528
  0.94110000   2.49377839
  0.94110000   1.99631736
  0.94110000   2.49376782
  0.94110000   1.99631908
  0.94110000   2.49375856
  0.94110000   1.99632052
  0.94110000   2.49375039
  0.94110000   1.99632173
  0.94110000   2.49374312
  0.94110000   1.99632278
  0.94110000   2.49373662
  0.94110000   1.99632368
  0.94110000   2.49373076
  0.94110000   1.99632448
  0.94110000   2.49372545
  0.94110000   1.99632517
  0.94110000   2.49372063
  0.94120000   2.49479298
  0.94120000   1.99495524
  0.94120000   2.49477619
  0.94120000   1.99495837
  0.94120000   2.49476200
  0.94120000   1.99496088
  0.94120000   2.49474984
  0.94120000   1.99496292
  0.94120000   2.49473930
  0.94120000   1.99496461
  0.94120000   2.49473007
  0.94120000   1.99496602
  0.94120000   2.49472193
  0.94120000   1.99496723
  0.94120000   2.49471469
  0.94120000   1.99496825
  0.94120000   2.49470820
  0.94120000   1.99496914
  0.94120000   2.49470236
  0.94120000   1.99496992
  0.94120000   2.49469707
  0.94120000   1.99497060
  0.94120000   2.49469226
  0.94130000   2.49575941
  0.94130000   1.99360634
  0.94130000   2.49574268
  0.94130000   1.99360943
  0.94130000   2.49572854
  0.94130000   1.99361190
  0.94130000   2.49571642
  0.94130000   1.99361390
  0.94130000   2.49570592
  0.94130000   1.99361556
  0.94130000   2.49569672
  0.94130000   1.99361695
  0.94130000   2.49568860
  0.94130000   1.99361813
  0.94130000   2.49568139
  0.94130000   1.99361914
  0.94130000   2.49567492
  0.94130000   1.99362001
  0.94130000   2.49566910
  0.94130000   1.99362077
  0.94130000   2.49566383
  0.94130000   1.99362144
  0.94130000   2.49565903
  0.94140000   2.49672105
  0.94140000   1.99226279
  0.94140000   2.49670438
  0.94140000   1.99226582
  0.94140000   2.49669029
  0.94140000   1.99226825
  0.94140000   2.49667821
  0.94140000   1.99227022
  0.94140000   2.49666774
  0.94140000   1.99227185
  0.94140000   2.49665858
  0.94140000   1.99227322
  0.94140000   2.49665049
  0.94140000   1.99227437
  0.94140000   2.49664329
  0.94140000   1.99227537
  0.94140000   2.49663684
  0.94140000   1.99227622
  0.94140000   2.49663104
  0.94140000   1.99227697
  0.94140000   2.49662578
  0.94140000   1.99227763
  0.94140000   2.49662100
  0.94150000   2.49767796
  0.94150000   1.99092450
  0.94150000   2.49766136
  0.94150000   1.99092749
  0.94150000   2.49764732
  0.94150000   1.99092987
  0.94150000   2.49763528
  0.94150000   1.99093181
  0.94150000   2.49762484
  0.94150000   1.99093341
  0.94150000   2.49761571
  0.94150000   1.99093476
  0.94150000   2.49760764
  0.94150000   1.99093590
  0.94150000   2.49760047
  0.94150000   1.99093687
  0.94150000   2.49759404
  0.94150000   1.99093771
  0.94150000   2.49758825
  0.94150000   1.99093845
  0.94150000   2.49758301
  0.94150000   1.99093909
  0.94150000   2.49757825
  0.94160000   2.49863022
  0.94160000   1.98959142
  0.94160000   2.49861369
  0.94160000   1.98959436
  0.94160000   2.49859969
  0.94160000   1.98959670
  0.94160000   2.49858769
  0.94160000   1.98959861
  0.94160000   2.49857729
  0.94160000   1.98960018
  0.94160000   2.49856818
  0.94160000   1.98960150
  0.94160000   2.49856014
  0.94160000   1.98960262
  0.94160000   2.49855299
  0.94160000   1.98960358
  0.94160000   2.49854659
  0.94160000   1.98960441
  0.94160000   2.49854082
  0.94160000   1.98960513
  0.94160000   2.49853559
  0.94160000   1.98960576
  0.94160000   2.49853084
  0.94170000   2.49957790
  0.94170000   1.98826348
  0.94170000   2.49956142
  0.94170000   1.98826636
  0.94170000   2.49954748
  0.94170000   1.98826867
  0.94170000   2.49953552
  0.94170000   1.98827054
  0.94170000   2.49952515
  0.94170000   1.98827209
  0.94170000   2.49951607
  0.94170000   1.98827339
  0.94170000   2.49950806
  0.94170000   1.98827449
  0.94170000   2.49950093
  0.94170000   1.98827543
  0.94170000   2.49949454
  0.94170000   1.98827625
  0.94170000   2.49948879
  0.94170000   1.98827695
  0.94170000   2.49948358
  0.94170000   1.98827757
  0.94170000   2.49947884
  0.94180000   2.50052106
  0.94180000   1.98694061
  0.94180000   2.50050464
  0.94180000   1.98694344
  0.94180000   2.50049074
  0.94180000   1.98694571
  0.94180000   2.50047882
  0.94180000   1.98694756
  0.94180000   2.50046849
  0.94180000   1.98694908
  0.94180000   2.50045944
  0.94180000   1.98695035
  0.94180000   2.50045145
  0.94180000   1.98695144
  0.94180000   2.50044434
  0.94180000   1.98695236
  0.94180000   2.50043797
  0.94180000   1.98695316
  0.94180000   2.50043224
  0.94180000   1.98695386
  0.94180000   2.50042704
  0.94180000   1.98695447
  0.94180000   2.50042231
  0.94190000   2.50145976
  0.94190000   1.98562275
  0.94190000   2.50144340
  0.94190000   1.98562554
  0.94190000   2.50142955
  0.94190000   1.98562777
  0.94190000   2.50141767
  0.94190000   1.98562958
  0.94190000   2.50140737
  0.94190000   1.98563108
  0.94190000   2.50139835
  0.94190000   1.98563233
  0.94190000   2.50139038
  0.94190000   1.98563339
  0.94190000   2.50138329
  0.94190000   1.98563430
  0.94190000   2.50137694
  0.94190000   1.98563509
  0.94190000   2.50137122
  0.94190000   1.98563577
  0.94190000   2.50136604
  0.94190000   1.98563637
  0.94190000   2.50136133
  0.94200000   2.50239407
  0.94200000   1.98430984
  0.94200000   2.50237776
  0.94200000   1.98431258
  0.94200000   2.50236396
  0.94200000   1.98431477
  0.94200000   2.50235212
  0.94200000   1.98431656
  0.94200000   2.50234185
  0.94200000   1.98431803
  0.94200000   2.50233286
  0.94200000   1.98431926
  0.94200000   2.50232492
  0.94200000   1.98432030
  0.94200000   2.50231785
  0.94200000   1.98432120
  0.94200000   2.50231152
  0.94200000   1.98432197
  0.94200000   2.50230581
  0.94200000   1.98432264
  0.94200000   2.50230065
  0.94200000   1.98432323
  0.94200000   2.50229595
  0.94210000   2.50332404
  0.94210000   1.98300181
  0.94210000   2.50330779
  0.94210000   1.98300451
  0.94210000   2.50329403
  0.94210000   1.98300667
  0.94210000   2.50328223
  0.94210000   1.98300842
  0.94210000   2.50327200
  0.94210000   1.98300987
  0.94210000   2.50326303
  0.94210000   1.98301108
  0.94210000   2.50325511
  0.94210000   1.98301211
  0.94210000   2.50324807
  0.94210000   1.98301299
  0.94210000   2.50324176
  0.94210000   1.98301375
  0.94210000   2.50323607
  0.94210000   1.98301441
  0.94210000   2.50323092
  0.94210000   1.98301499
  0.94210000   2.50322623
  0.94220000   2.50424975
  0.94220000   1.98169862
  0.94220000   2.50423355
  0.94220000   1.98170127
  0.94220000   2.50421984
  0.94220000   1.98170340
  0.94220000   2.50420808
  0.94220000   1.98170512
  0.94220000   2.50419787
  0.94220000   1.98170655
  0.94220000   2.50418894
  0.94220000   1.98170774
  0.94220000   2.50418104
  0.94220000   1.98170875
  0.94220000   2.50417401
  0.94220000   1.98170961
  0.94220000   2.50416772
  0.94220000   1.98171035
  0.94220000   2.50416205
  0.94220000   1.98171100
  0.94220000   2.50415691
  0.94220000   1.98171157
  0.94220000   2.50415224
  0.94230000   2.50517123
  0.94230000   1.98040020
  0.94230000   2.50515509
  0.94230000   1.98040281
  0.94230000   2.50514143
  0.94230000   1.98040490
  0.94230000   2.50512970
  0.94230000   1.98040659
  0.94230000   2.50511953
  0.94230000   1.98040800
  0.94230000   2.50511062
  0.94230000   1.98040917
  0.94230000   2.50510275
  0.94230000   1.98041016
  0.94230000   2.50509574
  0.94230000   1.98041101
  0.94230000   2.50508947
  0.94230000   1.98041174
  0.94230000   2.50508382
  0.94230000   1.98041238
  0.94230000   2.50507869
  0.94230000   1.98041294
  0.94230000   2.50507403
  0.94240000   2.50608857
  0.94240000   1.97910649
  0.94240000   2.50607248
  0.94240000   1.97910907
  0.94240000   2.50605886
  0.94240000   1.97911112
  0.94240000   2.50604717
  0.94240000   1.97911279
  0.94240000   2.50603703
  0.94240000   1.97911416
  0.94240000   2.50602815
  0.94240000   1.97911532
  0.94240000   2.50602030
  0.94240000   1.97911629
  0.94240000   2.50601332
  0.94240000   1.97911713
  0.94240000   2.50600706
  0.94240000   1.97911784
  0.94240000   2.50600142
  0.94240000   1.97911847
  0.94240000   2.50599631
  0.94240000   1.97911902
  0.94240000   2.50599166
  0.94250000   2.50700180
  0.94250000   1.97781745
  0.94250000   2.50698577
  0.94250000   1.97781998
  0.94250000   2.50697219
  0.94250000   1.97782200
  0.94250000   2.50696054
  0.94250000   1.97782364
  0.94250000   2.50695043
  0.94250000   1.97782500
  0.94250000   2.50694157
  0.94250000   1.97782613
  0.94250000   2.50693375
  0.94250000   1.97782709
  0.94250000   2.50692678
  0.94250000   1.97782791
  0.94250000   2.50692055
  0.94250000   1.97782861
  0.94250000   2.50691492
  0.94250000   1.97782923
  0.94250000   2.50690983
  0.94250000   1.97782977
  0.94250000   2.50690519
  0.94260000   2.50791099
  0.94260000   1.97653301
  0.94260000   2.50789501
  0.94260000   1.97653550
  0.94260000   2.50788148
  0.94260000   1.97653749
  0.94260000   2.50786986
  0.94260000   1.97653910
  0.94260000   2.50785979
  0.94260000   1.97654044
  0.94260000   2.50785096
  0.94260000   1.97654155
  0.94260000   2.50784315
  0.94260000   1.97654250
  0.94260000   2.50783621
  0.94260000   1.97654330
  0.94260000   2.50782999
  0.94260000   1.97654400
  0.94260000   2.50782438
  0.94260000   1.97654460
  0.94260000   2.50781930
  0.94260000   1.97654513
  0.94260000   2.50781467
  0.94270000   2.50881619
  0.94270000   1.97525313
  0.94270000   2.50880027
  0.94270000   1.97525558
  0.94270000   2.50878678
  0.94270000   1.97525754
  0.94270000   2.50877520
  0.94270000   1.97525913
  0.94270000   2.50876515
  0.94270000   1.97526044
  0.94270000   2.50875634
  0.94270000   1.97526153
  0.94270000   2.50874856
  0.94270000   1.97526246
  0.94270000   2.50874164
  0.94270000   1.97526325
  0.94270000   2.50873543
  0.94270000   1.97526393
  0.94270000   2.50872984
  0.94270000   1.97526453
  0.94270000   2.50872477
  0.94270000   1.97526505
  0.94270000   2.50872016
  0.94280000   2.50971745
  0.94280000   1.97397775
  0.94280000   2.50970158
  0.94280000   1.97398016
  0.94280000   2.50968813
  0.94280000   1.97398209
  0.94280000   2.50967659
  0.94280000   1.97398365
  0.94280000   2.50966657
  0.94280000   1.97398494
  0.94280000   2.50965779
  0.94280000   1.97398602
  0.94280000   2.50965004
  0.94280000   1.97398693
  0.94280000   2.50964313
  0.94280000   1.97398771
  0.94280000   2.50963694
  0.94280000   1.97398838
  0.94280000   2.50963137
  0.94280000   1.97398896
  0.94280000   2.50962631
  0.94280000   1.97398947
  0.94280000   2.50962171
  0.94290000   2.51061482
  0.94290000   1.97270683
  0.94290000   2.51059901
  0.94290000   1.97270919
  0.94290000   2.51058561
  0.94290000   1.97271109
  0.94290000   2.51057410
  0.94290000   1.97271263
  0.94290000   2.51056411
  0.94290000   1.97271389
  0.94290000   2.51055535
  0.94290000   1.97271495
  0.94290000   2.51054762
  0.94290000   1.97271585
  0.94290000   2.51054073
  0.94290000   1.97271662
  0.94290000   2.51053456
  0.94290000   1.97271728
  0.94290000   2.51052900
  0.94290000   1.97271785
  0.94290000   2.51052396
  0.94290000   1.97271835
  0.94290000   2.51051938
  0.94300000   2.51150836
  0.94300000   1.97144030
  0.94300000   2.51149260
  0.94300000   1.97144263
  0.94300000   2.51147924
  0.94300000   1.97144449
  0.94300000   2.51146777
  0.94300000   1.97144601
  0.94300000   2.51145781
  0.94300000   1.97144725
  0.94300000   2.51144908
  0.94300000   1.97144830
  0.94300000   2.51144137
  0.94300000   1.97144918
  0.94300000   2.51143450
  0.94300000   1.97144993
  0.94300000   2.51142835
  0.94300000   1.97145058
  0.94300000   2.51142280
  0.94300000   1.97145114
  0.94300000   2.51141778
  0.94300000   1.97145164
  0.94300000   2.51141320
  0.94310000   2.51239812
  0.94310000   1.97017813
  0.94310000   2.51238241
  0.94310000   1.97018042
  0.94310000   2.51236909
  0.94310000   1.97018225
  0.94310000   2.51235766
  0.94310000   1.97018374
  0.94310000   2.51234773
  0.94310000   1.97018497
  0.94310000   2.51233902
  0.94310000   1.97018599
  0.94310000   2.51233133
  0.94310000   1.97018686
  0.94310000   2.51232449
  0.94310000   1.97018760
  0.94310000   2.51231835
  0.94310000   1.97018824
  0.94310000   2.51231282
  0.94310000   1.97018879
  0.94310000   2.51230781
  0.94310000   1.97018928
  0.94310000   2.51230324
  0.94320000   2.51328414
  0.94320000   1.96892027
  0.94320000   2.51326849
  0.94320000   1.96892251
  0.94320000   2.51325521
  0.94320000   1.96892432
  0.94320000   2.51324381
  0.94320000   1.96892578
  0.94320000   2.51323391
  0.94320000   1.96892699
  0.94320000   2.51322523
  0.94320000   1.96892800
  0.94320000   2.51321756
  0.94320000   1.96892885
  0.94320000   2.51321073
  0.94320000   1.96892958
  0.94320000   2.51320461
  0.94320000   1.96893021
  0.94320000   2.51319909
  0.94320000   1.96893075
  0.94320000   2.51319410
  0.94320000   1.96893123
  0.94320000   2.51318954
  0.94330000   2.51416647
  0.94330000   1.96766667
  0.94330000   2.51415088
  0.94330000   1.96766887
  0.94330000   2.51413764
  0.94330000   1.96767065
  0.94330000   2.51412627
  0.94330000   1.96767209
  0.94330000   2.51411640
  0.94330000   1.96767328
  0.94330000   2.51410775
  0.94330000   1.96767427
  0.94330000   2.51410010
  0.94330000   1.96767511
  0.94330000   2.51409329
  0.94330000   1.96767582
  0.94330000   2.51408719
  0.94330000   1.96767644
  0.94330000   2.51408168
  0.94330000   1.96767697
  0.94330000   2.51407670
  0.94330000   1.96767744
  0.94330000   2.51407216
  0.94340000   2.51504516
  0.94340000   1.96641728
  0.94340000   2.51502963
  0.94340000   1.96641943
  0.94340000   2.51501643
  0.94340000   1.96642119
  0.94340000   2.51500510
  0.94340000   1.96642260
  0.94340000   2.51499525
  0.94340000   1.96642377
  0.94340000   2.51498662
  0.94340000   1.96642475
  0.94340000   2.51497900
  0.94340000   1.96642557
  0.94340000   2.51497221
  0.94340000   1.96642627
  0.94340000   2.51496612
  0.94340000   1.96642688
  0.94340000   2.51496063
  0.94340000   1.96642741
  0.94340000   2.51495566
  0.94340000   1.96642787
  0.94340000   2.51495113
  0.94350000   2.51592026
  0.94350000   1.96517207
  0.94350000   2.51590478
  0.94350000   1.96517416
  0.94350000   2.51589162
  0.94350000   1.96517590
  0.94350000   2.51588033
  0.94350000   1.96517729
  0.94350000   2.51587051
  0.94350000   1.96517844
  0.94350000   2.51586191
  0.94350000   1.96517940
  0.94350000   2.51585430
  0.94350000   1.96518021
  0.94350000   2.51584753
  0.94350000   1.96518090
  0.94350000   2.51584146
  0.94350000   1.96518149
  0.94350000   2.51583598
  0.94350000   1.96518201
  0.94350000   2.51583102
  0.94350000   1.96518246
  0.94350000   2.51582651
  0.94360000   2.51679180
  0.94360000   1.96393098
  0.94360000   2.51677639
  0.94360000   1.96393302
  0.94360000   2.51676327
  0.94360000   1.96393473
  0.94360000   2.51675200
  0.94360000   1.96393610
  0.94360000   2.51674222
  0.94360000   1.96393723
  0.94360000   2.51673364
  0.94360000   1.96393817
  0.94360000   2.51672606
  0.94360000   1.96393897
  0.94360000   2.51671930
  0.94360000   1.96393965
  0.94360000   2.51671324
  0.94360000   1.96394023
  0.94360000   2.51670779
  0.94360000   1.96394074
  0.94360000   2.51670284
  0.94360000   1.96394119
  0.94360000   2.51669833
  0.94370000   2.51765983
  0.94370000   1.96269399
  0.94370000   2.51764450
  0.94370000   1.96269595
  0.94370000   2.51763141
  0.94370000   1.96269765
  0.94370000   2.51762018
  0.94370000   1.96269899
  0.94370000   2.51761042
  0.94370000   1.96270010
  0.94370000   2.51760187
  0.94370000   1.96270103
  0.94370000   2.51759430
  0.94370000   1.96270181
  0.94370000   2.51758757
  0.94370000   1.96270248
  0.94370000   2.51758153
  0.94370000   1.96270306
  0.94370000   2.51757608
  0.94370000   1.96270356
  0.94370000   2.51757115
  0.94370000   1.96270399
  0.94370000   2.51756666
  0.94380000   2.51852440
  0.94380000   1.96146104
  0.94380000   2.51850915
  0.94380000   1.96146291
  0.94380000   2.51849609
  0.94380000   1.96146460
  0.94380000   2.51848490
  0.94380000   1.96146592
  0.94380000   2.51847517
  0.94380000   1.96146701
  0.94380000   2.51846664
  0.94380000   1.96146793
  0.94380000   2.51845910
  0.94380000   1.96146870
  0.94380000   2.51845238
  0.94380000   1.96146935
  0.94380000   2.51844635
  0.94380000   1.96146992
  0.94380000   2.51844092
  0.94380000   1.96147041
  0.94380000   2.51843600
  0.94380000   1.96147084
  0.94380000   2.51843152
  0.94390000   2.51938554
  0.94390000   1.96023212
  0.94390000   2.51937039
  0.94390000   1.96023387
  0.94390000   2.51935736
  0.94390000   1.96023555
  0.94390000   2.51934620
  0.94390000   1.96023684
  0.94390000   2.51933650
  0.94390000   1.96023793
  0.94390000   2.51932799
  0.94390000   1.96023882
  0.94390000   2.51932047
  0.94390000   1.96023958
  0.94390000   2.51931377
  0.94390000   1.96024023
  0.94390000   2.51930776
  0.94390000   1.96024078
  0.94390000   2.51930234
  0.94390000   1.96024126
  0.94390000   2.51929743
  0.94390000   1.96024168
  0.94390000   2.51929296
  0.94400000   2.52024330
  0.94400000   1.95900717
  0.94400000   2.52022825
  0.94400000   1.95900877
  0.94400000   2.52021524
  0.94400000   1.95901047
  0.94400000   2.52020413
  0.94400000   1.95901172
  0.94400000   2.52019445
  0.94400000   1.95901279
  0.94400000   2.52018597
  0.94400000   1.95901367
  0.94400000   2.52017846
  0.94400000   1.95901442
  0.94400000   2.52017178
  0.94400000   1.95901505
  0.94400000   2.52016579
  0.94400000   1.95901560
  0.94400000   2.52016039
  0.94400000   1.95901607
  0.94400000   2.52015549
  0.94400000   1.95901649
  0.94400000   2.52015103
  0.94410000   2.52109770
  0.94410000   1.95778616
  0.94410000   2.52108279
  0.94410000   1.95778758
  0.94410000   2.52106980
  0.94410000   1.95778930
  0.94410000   2.52105872
  0.94410000   1.95779052
  0.94410000   2.52104907
  0.94410000   1.95779157
  0.94410000   2.52104061
  0.94410000   1.95779244
  0.94410000   2.52103313
  0.94410000   1.95779317
  0.94410000   2.52102646
  0.94410000   1.95779380
  0.94410000   2.52102049
  0.94410000   1.95779434
  0.94410000   2.52101510
  0.94410000   1.95779480
  0.94410000   2.52101021
  0.94410000   1.95779520
  0.94410000   2.52100577
  0.94420000   2.52194879
  0.94420000   1.95656908
  0.94420000   2.52193405
  0.94420000   1.95657025
  0.94420000   2.52192105
  0.94420000   1.95657201
  0.94420000   2.52191003
  0.94420000   1.95657319
  0.94420000   2.52190040
  0.94420000   1.95657423
  0.94420000   2.52189196
  0.94420000   1.95657508
  0.94420000   2.52188450
  0.94420000   1.95657581
  0.94420000   2.52187785
  0.94420000   1.95657642
  0.94420000   2.52187189
  0.94420000   1.95657695
  0.94420000   2.52186652
  0.94420000   1.95657740
  0.94420000   2.52186165
  0.94420000   1.95657780
  0.94420000   2.52185721
  0.94430000   2.52279659
  0.94430000   1.95535589
  0.94430000   2.52278206
  0.94430000   1.95535673
  0.94430000   2.52276906
  0.94430000   1.95535856
  0.94430000   2.52275808
  0.94430000   1.95535970
  0.94430000   2.52274847
  0.94430000   1.95536073
  0.94430000   2.52274006
  0.94430000   1.95536157
  0.94430000   2.52273262
  0.94430000   1.95536228
  0.94430000   2.52272599
  0.94430000   1.95536288
  0.94430000   2.52272005
  0.94430000   1.95536340
  0.94430000   2.52271468
  0.94430000   1.95536385
  0.94430000   2.52270982
  0.94430000   1.95536424
  0.94430000   2.52270540
  0.94440000   2.52364115
  0.94440000   1.95414657
  0.94440000   2.52362687
  0.94440000   1.95414699
  0.94440000   2.52361384
  0.94440000   1.95414893
  0.94440000   2.52360292
  0.94440000   1.95415000
  0.94440000   2.52359333
  0.94440000   1.95415103
  0.94440000   2.52358495
  0.94440000   1.95415185
  0.94440000   2.52357752
  0.94440000   1.95415255
  0.94440000   2.52357091
  0.94440000   1.95415314
  0.94440000   2.52356498
  0.94440000   1.95415365
  0.94440000   2.52355964
  0.94440000   1.95415409
  0.94440000   2.52355479
  0.94440000   1.95415448
  0.94440000   2.52355037
  0.94450000   2.52448249
  0.94450000   1.95294110
  0.94450000   2.52446853
  0.94450000   1.95294098
  0.94450000   2.52445545
  0.94450000   1.95294306
  0.94450000   2.52444459
  0.94450000   1.95294406
  0.94450000   2.52443502
  0.94450000   1.95294510
  0.94450000   2.52442666
  0.94450000   1.95294589
  0.94450000   2.52441926
  0.94450000   1.95294658
  0.94450000   2.52441266
  0.94450000   1.95294716
  0.94450000   2.52440675
  0.94450000   1.95294766
  0.94450000   2.52440141
  0.94450000   1.95294810
  0.94450000   2.52439658
  0.94450000   1.95294848
  0.94450000   2.52439217
  0.94460000   2.52532062
  0.94460000   1.95173946
  0.94460000   2.52530707
  0.94460000   1.95173865
  0.94460000   2.52529391
  0.94460000   1.95174094
  0.94460000   2.52528312
  0.94460000   1.95174184
  0.94460000   2.52527357
  0.94460000   1.95174289
  0.94460000   2.52526524
  0.94460000   1.95174366
  0.94460000   2.52525785
  0.94460000   1.95174434
  0.94460000   2.52525127
  0.94460000   1.95174491
  0.94460000   2.52524538
  0.94460000   1.95174541
  0.94460000   2.52524006
  0.94460000   1.95174583
  0.94460000   2.52523523
  0.94460000   1.95174620
  0.94460000   2.52523084
  0.94470000   2.52615559
  0.94470000   1.95054165
  0.94470000   2.52614255
  0.94470000   1.95053996
  0.94470000   2.52612926
  0.94470000   1.95054253
  0.94470000   2.52611856
  0.94470000   1.95054330
  0.94470000   2.52610902
  0.94470000   1.95054437
  0.94470000   2.52610072
  0.94470000   1.95054512
  0.94470000   2.52609335
  0.94470000   1.95054579
  0.94470000   2.52608679
  0.94470000   1.95054635
  0.94470000   2.52608091
  0.94470000   1.95054684
  0.94470000   2.52607560
  0.94470000   1.95054726
  0.94470000   2.52607079
  0.94470000   1.95054762
  0.94470000   2.52606640
  0.94480000   2.52698741
  0.94480000   1.94934766
  0.94480000   2.52697499
  0.94480000   1.94934485
  0.94480000   2.52696154
  0.94480000   1.94934779
  0.94480000   2.52695095
  0.94480000   1.94934840
  0.94480000   2.52694140
  0.94480000   1.94934951
  0.94480000   2.52693313
  0.94480000   1.94935023
  0.94480000   2.52692578
  0.94480000   1.94935090
  0.94480000   2.52691924
  0.94480000   1.94935145
  0.94480000   2.52691337
  0.94480000   1.94935193
  0.94480000   2.52690808
  0.94480000   1.94935234
  0.94480000   2.52690328
  0.94480000   1.94935269
  0.94480000   2.52689891
  0.94490000   2.52781610
  0.94490000   1.94815748
  0.94490000   2.52780446
  0.94490000   1.94815329
  0.94490000   2.52779077
  0.94490000   1.94815671
  0.94490000   2.52778031
  0.94490000   1.94815712
  0.94490000   2.52777076
  0.94490000   1.94815828
  0.94490000   2.52776253
  0.94490000   1.94815896
  0.94490000   2.52775519
  0.94490000   1.94815963
  0.94490000   2.52774867
  0.94490000   1.94816016
  0.94490000   2.52774281
  0.94490000   1.94816063
  0.94490000   2.52773754
  0.94490000   1.94816104
  0.94490000   2.52773275
  0.94490000   1.94816139
  0.94490000   2.52772839
  0.94500000   2.52864168
  0.94500000   1.94697110
  0.94500000   2.52863098
  0.94500000   1.94696521
  0.94500000   2.52861699
  0.94500000   1.94696925
  0.94500000   2.52860670
  0.94500000   1.94696940
  0.94500000   2.52859712
  0.94500000   1.94697064
  0.94500000   2.52858893
  0.94500000   1.94697127
  0.94500000   2.52858161
  0.94500000   1.94697194
  0.94500000   2.52857511
  0.94500000   1.94697246
  0.94500000   2.52856926
  0.94500000   1.94697292
  0.94500000   2.52856400
  0.94500000   1.94697332
  0.94500000   2.52855922
  0.94500000   1.94697367
  0.94500000   2.52855487
  0.94510000   2.52946417
  0.94510000   1.94578852
  0.94510000   2.52945460
  0.94510000   1.94578059
  0.94510000   2.52944024
  0.94510000   1.94578539
  0.94510000   2.52943013
  0.94510000   1.94578522
  0.94510000   2.52942052
  0.94510000   1.94578656
  0.94510000   2.52941238
  0.94510000   1.94578713
  0.94510000   2.52940507
  0.94510000   1.94578781
  0.94510000   2.52939859
  0.94510000   1.94578831
  0.94510000   2.52939276
  0.94510000   1.94578877
  0.94510000   2.52938751
  0.94510000   1.94578916
  0.94510000   2.52938274
  0.94510000   1.94578950
  0.94510000   2.52937840
  0.94520000   2.53028361
  0.94520000   1.94460971
  0.94520000   2.53027536
  0.94520000   1.94459936
  0.94520000   2.53026053
  0.94520000   1.94460509
  0.94520000   2.53025066
  0.94520000   1.94460453
  0.94520000   2.53024100
  0.94520000   1.94460600
  0.94520000   2.53023291
  0.94520000   1.94460651
  0.94520000   2.53022561
  0.94520000   1.94460720
  0.94520000   2.53021915
  0.94520000   1.94460768
  0.94520000   2.53021333
  0.94520000   1.94460814
  0.94520000   2.53020810
  0.94520000   1.94460852
  0.94520000   2.53020334
  0.94520000   1.94460885
  0.94520000   2.53019901
  0.94530000   2.53110002
  0.94530000   1.94343464
  0.94530000   2.53109330
  0.94530000   1.94342150
  0.94530000   2.53107791
  0.94530000   1.94342834
  0.94530000   2.53106832
  0.94530000   1.94342730
  0.94530000   2.53105858
  0.94530000   1.94342894
  0.94530000   2.53105056
  0.94530000   1.94342936
  0.94530000   2.53104326
  0.94530000   1.94343007
  0.94530000   2.53103682
  0.94530000   1.94343054
  0.94530000   2.53103102
  0.94530000   1.94343099
  0.94530000   2.53102580
  0.94530000   1.94343136
  0.94530000   2.53102106
  0.94530000   1.94343169
  0.94530000   2.53101674
  0.94540000   2.53191347
  0.94540000   1.94226325
  0.94540000   2.53190844
  0.94540000   1.94224699
  0.94540000   2.53189240
  0.94540000   1.94225510
  0.94540000   2.53188313
  0.94540000   1.94225350
  0.94540000   2.53187331
  0.94540000   1.94225535
  0.94540000   2.53186535
  0.94540000   1.94225567
  0.94540000   2.53185805
  0.94540000   1.94225641
  0.94540000   2.53185164
  0.94540000   1.94225685
  0.94540000   2.53184585
  0.94540000   1.94225730
  0.94540000   2.53184064
  0.94540000   1.94225766
  0.94540000   2.53183592
  0.94540000   1.94225799
  0.94540000   2.53183161
  0.94550000   2.53272401
  0.94550000   1.94109542
  0.94550000   2.53272081
  0.94550000   1.94107580
  0.94550000   2.53270405
  0.94550000   1.94108533
  0.94550000   2.53269513
  0.94550000   1.94108310
  0.94550000   2.53268520
  0.94550000   1.94108520
  0.94550000   2.53267733
  0.94550000   1.94108539
  0.94550000   2.53267002
  0.94550000   1.94108617
  0.94550000   2.53266364
  0.94550000   1.94108658
  0.94550000   2.53265786
  0.94550000   1.94108703
  0.94550000   2.53265267
  0.94550000   1.94108738
  0.94550000   2.53264795
  0.94550000   1.94108771
  0.94550000   2.53264365
  0.94560000   2.53353174
  0.94560000   1.93993101
  0.94560000   2.53353041
  0.94560000   1.93990796
  0.94560000   2.53351289
  0.94560000   1.93991898
  0.94560000   2.53350436
  0.94560000   1.93991608
  0.94560000   2.53349430
  0.94560000   1.93991844
  0.94560000   2.53348652
  0.94560000   1.93991851
  0.94560000   2.53347921
  0.94560000   1.93991932
  0.94560000   2.53347285
  0.94560000   1.93991971
  0.94560000   2.53346708
  0.94560000   1.93992016
  0.94560000   2.53346191
  0.94560000   1.93992050
  0.94560000   2.53345720
  0.94560000   1.93992082
  0.94560000   2.53345291
  0.94570000   2.53433683
  0.94570000   1.93876977
  0.94570000   2.53433722
  0.94570000   1.93874353
  0.94570000   2.53431897
  0.94570000   1.93875599
  0.94570000   2.53431083
  0.94570000   1.93875241
  0.94570000   2.53430065
  0.94570000   1.93875506
  0.94570000   2.53429296
  0.94570000   1.93875498
  0.94570000   2.53428563
  0.94570000   1.93875584
  0.94570000   2.53427931
  0.94570000   1.93875619
  0.94570000   2.53427355
  0.94570000   1.93875665
  0.94570000   2.53426839
  0.94570000   1.93875698
  0.94570000   2.53426369
  0.94570000   1.93875729
  0.94570000   2.53425941
  0.94580000   2.53513947
  0.94580000   1.93761133
  0.94580000   2.53514121
  0.94580000   1.93758262
  0.94580000   2.53512236
  0.94580000   1.93759627
  0.94580000   2.53511457
  0.94580000   1.93759209
  0.94580000   2.53510426
  0.94580000   1.93759500
  0.94580000   2.53509666
  0.94580000   1.93759478
  0.94580000   2.53508933
  0.94580000   1.93759569
  0.94580000   2.53508304
  0.94580000   1.93759601
  0.94580000   2.53507729
  0.94580000   1.93759647
  0.94580000   2.53507214
  0.94580000   1.93759679
  0.94580000   2.53506746
  0.94580000   1.93759710
  0.94580000   2.53506319
  0.94590000   2.53593994
  0.94590000   1.93645520
  0.94590000   2.53594230
  0.94590000   1.93642541
  0.94590000   2.53592314
  0.94590000   1.93643970
  0.94590000   2.53591557
  0.94590000   1.93643514
  0.94590000   2.53590520
  0.94590000   1.93643822
  0.94590000   2.53589767
  0.94590000   1.93643790
  0.94590000   2.53589033
  0.94590000   1.93643885
  0.94590000   2.53588407
  0.94590000   1.93643913
  0.94590000   2.53587833
  0.94590000   1.93643960
  0.94590000   2.53587320
  0.94590000   1.93643991
  0.94590000   2.53586853
  0.94590000   1.93644021
  0.94590000   2.53586427
  0.94600000   2.53673862
  0.94600000   1.93530068
  0.94600000   2.53674034
  0.94600000   1.93527217
  0.94600000   2.53672141
  0.94600000   1.93528610
  0.94600000   2.53671385
  0.94600000   1.93528157
  0.94600000   2.53670349
  0.94600000   1.93528467
  0.94600000   2.53669600
  0.94600000   1.93528431
  0.94600000   2.53668868
  0.94600000   1.93528527
  0.94600000   2.53668244
  0.94600000   1.93528554
  0.94600000   2.53667671
  0.94600000   1.93528600
  0.94600000   2.53667159
  0.94600000   1.93528630
  0.94600000   2.53666693
  0.94600000   1.93528660
  0.94600000   2.53666269
  0.94610000   2.53753603
  0.94610000   1.93414684
  0.94610000   2.53753514
  0.94610000   1.93412330
  0.94610000   2.53751730
  0.94610000   1.93413527
  0.94610000   2.53750937
  0.94610000   1.93413148
  0.94610000   2.53749920
  0.94610000   1.93413427
  0.94610000   2.53749168
  0.94610000   1.93413401
  0.94610000   2.53748439
  0.94610000   1.93413492
  0.94610000   2.53747816
  0.94610000   1.93413519
  0.94610000   2.53747245
  0.94610000   1.93413564
  0.94610000   2.53746735
  0.94610000   1.93413594
  0.94610000   2.53746270
  0.94610000   1.93413623
  0.94610000   2.53745847
  0.94620000   2.53833279
  0.94620000   1.93299253
  0.94620000   2.53832645
  0.94620000   1.93297933
  0.94620000   2.53831099
  0.94620000   1.93298688
  0.94620000   2.53830211
  0.94620000   1.93298494
  0.94620000   2.53829238
  0.94620000   1.93298693
  0.94620000   2.53828471
  0.94620000   1.93298699
  0.94620000   2.53827752
  0.94620000   1.93298775
  0.94620000   2.53827128
  0.94620000   1.93298808
  0.94620000   2.53826560
  0.94620000   1.93298850
  0.94620000   2.53826050
  0.94620000   1.93298880
  0.94620000   2.53825586
  0.94620000   1.93298908
  0.94620000   2.53825164
  0.94630000   2.53912966
  0.94630000   1.93183633
  0.94630000   2.53911390
  0.94630000   1.93184094
  0.94630000   2.53910269
  0.94630000   1.93184057
  0.94630000   2.53909198
  0.94630000   1.93184211
  0.94630000   2.53908311
  0.94630000   1.93184255
  0.94630000   2.53907510
  0.94630000   1.93184328
  0.94630000   2.53906810
  0.94630000   1.93184372
  0.94630000   2.53906180
  0.94630000   1.93184418
  0.94630000   2.53905617
  0.94630000   1.93184453
  0.94630000   2.53905107
  0.94630000   1.93184485
  0.94630000   2.53904645
  0.94630000   1.93184512
  0.94630000   2.53904224
  0.94640000   2.53992749
  0.94640000   1.93067665
  0.94640000   2.53989710
  0.94640000   1.93070892
  0.94640000   2.53989265
  0.94640000   1.93069589
  0.94640000   2.53987892
  0.94640000   1.93070319
  0.94640000   2.53987148
  0.94640000   1.93070097
  0.94640000   2.53986286
  0.94640000   1.93070290
  0.94640000   2.53985616
  0.94640000   1.93070279
  0.94640000   2.53984975
  0.94640000   1.93070348
  0.94640000   2.53984420
  0.94640000   1.93070371
  0.94640000   2.53983909
  0.94640000   1.93070408
  0.94640000   2.53983449
  0.94640000   1.93070432
  0.94640000   2.53983029
  0.94650000   2.54072712
  0.94650000   1.92951194
  0.94650000   2.54067562
  0.94650000   1.92958410
  0.94650000   2.54068115
  0.94650000   1.92955234
  0.94650000   2.54066281
  0.94650000   1.92956838
  0.94650000   2.54065758
  0.94650000   1.92956205
  0.94650000   2.54064796
  0.94650000   1.92956589
  0.94650000   2.54064177
  0.94650000   1.92956487
  0.94650000   2.54063516
  0.94650000   1.92956598
  0.94650000   2.54062972
  0.94650000   1.92956601
  0.94650000   2.54062458
  0.94650000   1.92956646
  0.94650000   2.54062002
  0.94650000   1.92956665
  0.94650000   2.54061581
  0.94660000   2.54152911
  0.94660000   1.92834115
  0.94660000   2.54144915
  0.94660000   1.92846710
  0.94660000   2.54146842
  0.94660000   1.92840951
  0.94660000   2.54144357
  0.94660000   1.92843790
  0.94660000   2.54144151
  0.94660000   1.92842564
  0.94660000   2.54143041
  0.94660000   1.92843229
  0.94660000   2.54142496
  0.94660000   1.92842991
  0.94660000   2.54141802
  0.94660000   1.92843166
  0.94660000   2.54141277
  0.94660000   1.92843137
  0.94660000   2.54140756
  0.94660000   1.92843197
  0.94660000   2.54140306
  0.94660000   1.92843209
  0.94660000   2.54139884
  0.94670000   2.54233339
  0.94670000   1.92716442
  0.94670000   2.54221763
  0.94670000   1.92735803
  0.94670000   2.54225456
  0.94670000   1.92726721
  0.94670000   2.54222114
  0.94670000   1.92731184
  0.94670000   2.54222333
  0.94670000   1.92729161
  0.94670000   2.54221021
  0.94670000   1.92730214
  0.94670000   2.54220578
  0.94670000   1.92729786
  0.94670000   2.54219837
  0.94670000   1.92730052
  0.94670000   2.54219338
  0.94670000   1.92729978
  0.94670000   2.54218807
  0.94670000   1.92730059
  0.94670000   2.54218363
  0.94670000   1.92730060
  0.94670000   2.54217940
  0.94680000   2.54313862
  0.94680000   1.92598429
  0.94680000   2.54298167
  0.94680000   1.92625582
  0.94680000   2.54303939
  0.94680000   1.92612582
  0.94680000   2.54299564
  0.94680000   1.92619004
  0.94680000   2.54300306
  0.94680000   1.92615999
  0.94680000   2.54298737
  0.94680000   1.92617541
  0.94680000   2.54298426
  0.94680000   1.92616867
  0.94680000   2.54297623
  0.94680000   1.92617255
  0.94680000   2.54297157
  0.94680000   1.92617119
  0.94680000   2.54296612
  0.94680000   1.92617230
  0.94680000   2.54296177
  0.94680000   1.92617215
  0.94680000   2.54295752
  0.94690000   2.54394134
  0.94690000   1.92480729
  0.94690000   2.54374291
  0.94690000   1.92515734
  0.94690000   2.54382217
  0.94690000   1.92498676
  0.94690000   2.54376743
  0.94690000   1.92507180
  0.94690000   2.54378055
  0.94690000   1.92503106
  0.94690000   2.54376200
  0.94690000   1.92505193
  0.94690000   2.54376039
  0.94690000   1.92504239
  0.94690000   2.54375164
  0.94690000   1.92504768
  0.94690000   2.54374737
  0.94690000   1.92504560
  0.94690000   2.54374174
  0.94690000   1.92504706
  0.94690000   2.54373751
  0.94690000   1.92504673
  0.94690000   2.54373321
  0.94700000   2.54473485
  0.94700000   1.92364610
  0.94700000   2.54450476
  0.94700000   1.92405622
  0.94700000   2.54460125
  0.94700000   1.92385316
  0.94700000   2.54453738
  0.94700000   1.92395555
  0.94700000   2.54455542
  0.94700000   1.92390555
  0.94700000   2.54453432
  0.94700000   1.92393130
  0.94700000   2.54453411
  0.94700000   1.92391918
  0.94700000   2.54452465
  0.94700000   1.92392582
  0.94700000   2.54452079
  0.94700000   1.92392302
  0.94700000   2.54451498
  0.94700000   1.92392485
  0.94700000   2.54451086
  0.94700000   1.92392431
  0.94700000   2.54450652
  0.94710000   2.54550780
  0.94710000   1.92252218
  0.94710000   2.54527316
  0.94710000   1.92294124
  0.94710000   2.54537360
  0.94710000   1.92273076
  0.94710000   2.54530707
  0.94710000   1.92283830
  0.94710000   2.54532691
  0.94710000   1.92278495
  0.94710000   2.54530477
  0.94710000   1.92281273
  0.94710000   2.54530522
  0.94710000   1.92279940
  0.94710000   2.54529542
  0.94710000   1.92280672
  0.94710000   2.54529178
  0.94710000   1.92280352
  0.94710000   2.54528587
  0.94710000   1.92280557
  0.94710000   2.54528183
  0.94710000   1.92280491
  0.94710000   2.54527747
  0.94720000   2.54624278
  0.94720000   1.92146849
  0.94720000   2.54605747
  0.94720000   1.92179469
  0.94720000   2.54613427
  0.94720000   1.92162891
  0.94720000   2.54607917
  0.94720000   1.92171502
  0.94720000   2.54609363
  0.94720000   1.92167189
  0.94720000   2.54607410
  0.94720000   1.92169481
  0.94720000   2.54607336
  0.94720000   1.92168376
  0.94720000   2.54606416
  0.94720000   1.92168999
  0.94720000   2.54606027
  0.94720000   1.92168729
  0.94720000   2.54605451
  0.94720000   1.92168910
  0.94720000   2.54605042
  0.94720000   1.92168854
  0.94720000   2.54604611
  0.94730000   2.54691688
  0.94730000   1.92052841
  0.94730000   2.54687032
  0.94730000   1.92059270
  0.94730000   2.54687636
  0.94730000   1.92056075
  0.94730000   2.54685748
  0.94730000   1.92057852
  0.94730000   2.54685353
  0.94730000   1.92057027
  0.94730000   2.54684347
  0.94730000   1.92057536
  0.94730000   2.54683794
  0.94730000   1.92057339
  0.94730000   2.54683122
  0.94730000   1.92057498
  0.94730000   2.54682611
  0.94730000   1.92057464
  0.94730000   2.54682100
  0.94730000   1.92057524
  0.94730000   2.54681661
  0.94730000   1.92057529
  0.94730000   2.54681247
  0.94740000   2.54751211
  0.94740000   1.91973600
  0.94740000   2.54772213
  0.94740000   1.91931546
  0.94740000   2.54759367
  0.94740000   1.91953799
  0.94740000   2.54764561
  0.94740000   1.91942199
  0.94740000   2.54760456
  0.94740000   1.91948396
  0.94740000   2.54761406
  0.94740000   1.91945215
  0.94740000   2.54759833
  0.94740000   1.91946955
  0.94740000   2.54759702
  0.94740000   1.91946095
  0.94740000   2.54758910
  0.94740000   1.91946595
  0.94740000   2.54758550
  0.94740000   1.91946373
  0.94740000   2.54758035
  0.94740000   1.91946525
  0.94740000   2.54757663
  0.94750000   2.54805186
  0.94750000   1.91904710
  0.94750000   2.54860158
  0.94750000   1.91798426
  0.94750000   2.54829125
  0.94750000   1.91855109
  0.94750000   2.54844129
  0.94750000   1.91824967
  0.94750000   2.54834768
  0.94750000   1.91841119
  0.94750000   2.54838553
  0.94750000   1.91832583
  0.94750000   2.54835464
  0.94750000   1.91837197
  0.94750000   2.54836153
  0.94750000   1.91834793
  0.94750000   2.54834926
  0.94750000   1.91836121
  0.94750000   2.54834803
  0.94750000   1.91835454
  0.94750000   2.54834163
  0.94750000   1.91835844
  0.94750000   2.54833862
  0.94760000   2.54867078
  0.94760000   1.91820699
  0.94760000   2.54943758
  0.94760000   1.91673352
  0.94760000   2.54900704
  0.94760000   1.91752832
  0.94760000   2.54922445
  0.94760000   1.91709951
  0.94760000   2.54909356
  0.94760000   1.91733177
  0.94760000   2.54915225
  0.94760000   1.91720706
  0.94760000   2.54910989
  0.94760000   1.91727502
  0.94760000   2.54912320
  0.94760000   1.91723886
  0.94760000   2.54910742
  0.94760000   1.91725884
  0.94760000   2.54910818
  0.94760000   1.91724844
  0.94760000   2.54910073
  0.94760000   1.91725439
  0.94760000   2.54909832
  0.94770000   2.54969240
  0.94770000   1.91660325
  0.94770000   2.55005371
  0.94770000   1.91589726
  0.94770000   2.54983903
  0.94770000   1.91628410
  0.94770000   2.54994126
  0.94770000   1.91607341
  0.94770000   2.54987190
  0.94770000   1.91618946
  0.94770000   2.54989789
  0.94770000   1.91612671
  0.94770000   2.54987305
  0.94770000   1.91616164
  0.94770000   2.54987711
  0.94770000   1.91614307
  0.94770000   2.54986632
  0.94770000   1.91615367
  0.94770000   2.54986448
  0.94770000   1.91614826
  0.94770000   2.54985845
  0.94770000   1.91615155
  0.94770000   2.54985533
  0.94780000   2.55143617
  0.94780000   1.91362902
  0.94780000   2.55025725
  0.94780000   1.91584030
  0.94780000   2.55089607
  0.94780000   1.91461184
  0.94780000   2.55052821
  0.94780000   1.91529155
  0.94780000   2.55071890
  0.94780000   1.91491553
  0.94780000   2.55060159
  0.94780000   1.91512429
  0.94780000   2.55065603
  0.94780000   1.91500926
  0.94780000   2.55061644
  0.94780000   1.91507344
  0.94780000   2.55062984
  0.94780000   1.91503834
  0.94780000   2.55061471
  0.94780000   1.91505814
  0.94780000   2.55061607
  0.94780000   1.91504750
  0.94780000   2.55060891
  0.94790000   2.55193469
  0.94790000   1.91300884
  0.94790000   2.55114600
  0.94790000   1.91448350
  0.94790000   2.55157376
  0.94790000   1.91365540
  0.94790000   2.55132007
  0.94790000   1.91411976
  0.94790000   2.55144955
  0.94790000   1.91385998
  0.94790000   2.55136548
  0.94790000   1.91400618
  0.94790000   2.55140226
  0.94790000   1.91392477
  0.94790000   2.55137232
  0.94790000   1.91397087
  0.94790000   2.55138068
  0.94790000   1.91394545
  0.94790000   2.55136835
  0.94790000   1.91396006
  0.94790000   2.55136830
  0.94790000   1.91395219
  0.94790000   2.55136197
  0.94800000   2.55265664
  0.94800000   1.91195296
  0.94800000   2.55189849
  0.94800000   1.91337701
  0.94800000   2.55231845
  0.94800000   1.91256677
  0.94800000   2.55206846
  0.94800000   1.91302620
  0.94800000   2.55219884
  0.94800000   1.91276582
  0.94800000   2.55211418
  0.94800000   1.91291398
  0.94800000   2.55215241
  0.94800000   1.91283038
  0.94800000   2.55212178
  0.94800000   1.91287823
  0.94800000   2.55213100
  0.94800000   1.91285146
  0.94800000   2.55211833
  0.94800000   1.91286697
  0.94800000   2.55211871
  0.94800000   1.91285847
  0.94800000   2.55211225
  0.94810000   1.92430812
  0.94810000   2.55640572
  0.94810000   1.90513719
  0.94810000   2.55081611
  0.94810000   1.91573395
  0.94810000   2.55407483
  0.94810000   1.90954936
  0.94810000   2.55221608
  0.94810000   1.91306182
  0.94810000   2.55328019
  0.94810000   1.91103393
  0.94810000   2.55266230
  0.94810000   1.91219446
  0.94810000   2.55300906
  0.94810000   1.91152728
  0.94810000   2.55280219
  0.94810000   1.91191017
  0.94810000   2.55291357
  0.94810000   1.91169055
  0.94810000   2.55284279
  0.94810000   1.91181684
  0.94810000   2.55287710
  0.94810000   1.91174458
  0.94820000   1.91512896
  0.94820000   2.55500232
  0.94820000   1.90816430
  0.94820000   2.55288382
  0.94820000   1.91216396
  0.94820000   2.55410814
  0.94820000   1.90982636
  0.94820000   2.55338641
  0.94820000   1.91117993
  0.94820000   2.55379458
  0.94820000   1.91039255
  0.94820000   2.55354695
  0.94820000   1.91084991
  0.94820000   2.55368112
  0.94820000   1.91058454
  0.94820000   2.55359438
  0.94820000   1.91073903
  0.94820000   2.55363675
  0.94820000   1.91064964
  0.94820000   2.55360485
  0.94820000   1.91070187
  0.94820000   2.55361672
  0.94820000   1.91067181
  0.94830000   1.90822558
  0.94830000   2.55399658
  0.94830000   1.91040464
  0.94830000   2.55466333
  0.94830000   1.90912047
  0.94830000   2.55425642
  0.94830000   1.90987468
  0.94830000   2.55448173
  0.94830000   1.90943171
  0.94830000   2.55433684
  0.94830000   1.90969256
  0.94830000   2.55441078
  0.94830000   1.90953982
  0.94830000   2.55435728
  0.94830000   1.90963007
  0.94830000   2.55437967
  0.94830000   1.90957747
  0.94830000   2.55435833
  0.94830000   1.90960875
  0.94830000   2.55436344
  0.94830000   1.90959069
  0.94830000   2.55435366
  0.94830000   1.90960158
  0.94840000   1.90587181
  0.94840000   2.55432817
  0.94840000   1.91010450
  0.94840000   2.55565142
  0.94840000   1.90757365
  0.94840000   2.55485141
  0.94840000   1.90907346
  0.94840000   2.55531352
  0.94840000   1.90818078
  0.94840000   2.55502635
  0.94840000   1.90871142
  0.94840000   2.55518573
  0.94840000   1.90839639
  0.94840000   2.55508083
  0.94840000   1.90858406
  0.94840000   2.55513401
  0.94840000   1.90847294
  0.94840000   2.55509413
  0.94840000   1.90853934
  0.94840000   2.55511033
  0.94840000   1.90850020
  0.94840000   2.55509387
  0.94840000   1.90852374
  0.94850000   1.90753129
  0.94850000   2.55594144
  0.94850000   1.90737064
  0.94850000   2.55587883
  0.94850000   1.90746850
  0.94850000   2.55589957
  0.94850000   1.90741074
  0.94850000   2.55587227
  0.94850000   1.90744636
  0.94850000   2.55587561
  0.94850000   1.90742570
  0.94850000   2.55586202
  0.94850000   1.90743875
  0.94850000   2.55585985
  0.94850000   1.90743143
  0.94850000   2.55585189
  0.94850000   1.90743627
  0.94850000   2.55584832
  0.94850000   1.90743374
  0.94850000   2.55584289
  0.94850000   1.90743559
  0.94850000   2.55583927
  0.94850000   1.90743476
  0.94860000   1.90833770
  0.94860000   2.55727675
  0.94860000   1.90516122
  0.94860000   2.55625229
  0.94860000   1.90708490
  0.94860000   2.55685957
  0.94860000   1.90591349
  0.94860000   2.55647605
  0.94860000   1.90662527
  0.94860000   2.55669618
  0.94860000   1.90619297
  0.94860000   2.55655078
  0.94860000   1.90645618
  0.94860000   2.55662876
  0.94860000   1.90629669
  0.94860000   2.55657204
  0.94860000   1.90639404
  0.94860000   2.55659810
  0.94860000   1.90633525
  0.94860000   2.55657465
  0.94860000   1.90637129
  0.94860000   2.55658197
  0.94860000   1.90634967
  0.94870000   1.90753131
  0.94870000   2.55810514
  0.94870000   1.90391251
  0.94870000   2.55692781
  0.94870000   1.90612685
  0.94870000   2.55763613
  0.94870000   1.90476309
  0.94870000   2.55718651
  0.94870000   1.90560050
  0.94870000   2.55744977
  0.94870000   1.90508611
  0.94870000   2.55727635
  0.94870000   1.90540258
  0.94870000   2.55737245
  0.94870000   1.90520858
  0.94870000   2.55730402
  0.94870000   1.90532818
  0.94870000   2.55733761
  0.94870000   1.90525507
  0.94870000   2.55730932
  0.94870000   1.90530030
  0.94870000   2.55731974
  0.94870000   1.90527279
  0.94880000   1.90567749
  0.94880000   2.55859734
  0.94880000   1.90330114
  0.94880000   2.55781047
  0.94880000   1.90477421
  0.94880000   2.55828263
  0.94880000   1.90385851
  0.94880000   2.55797438
  0.94880000   1.90442755
  0.94880000   2.55815254
  0.94880000   1.90407460
  0.94880000   2.55803007
  0.94880000   1.90429434
  0.94880000   2.55809559
  0.94880000   1.90415836
  0.94880000   2.55804546
  0.94880000   1.90424323
  0.94880000   2.55806809
  0.94880000   1.90419089
  0.94880000   2.55804634
  0.94880000   1.90422371
  0.94880000   2.55805285
  0.94880000   1.90420360
  0.94890000   1.90339712
  0.94890000   2.55893881
  0.94890000   1.90297517
  0.94890000   2.55878721
  0.94890000   1.90324139
  0.94890000   2.55886465
  0.94890000   1.90307534
  0.94890000   2.55880060
  0.94890000   1.90318049
  0.94890000   2.55882728
  0.94890000   1.90311524
  0.94890000   2.55879859
  0.94890000   1.90315682
  0.94890000   2.55880598
  0.94890000   1.90313124
  0.94890000   2.55879184
  0.94890000   1.90314773
  0.94890000   2.55879217
  0.94890000   1.90313775
  0.94890000   2.55878423
  0.94890000   1.90314433
  0.94890000   2.55878218
  0.94890000   1.90314047
  0.94900000   1.90119059
  0.94900000   2.55928863
  0.94900000   1.90263242
  0.94900000   2.55975853
  0.94900000   1.90171742
  0.94900000   2.55944285
  0.94900000   1.90229842
  0.94900000   2.55962771
  0.94900000   1.90193051
  0.94900000   2.55949689
  0.94900000   1.90216454
  0.94900000   2.55956788
  0.94900000   1.90201667
  0.94900000   2.55951219
  0.94900000   1.90211097
  0.94900000   2.55953798
  0.94900000   1.90205159
  0.94900000   2.55951304
  0.94900000   1.90208961
  0.94900000   2.55952109
  0.94900000   1.90206581
  0.94900000   2.55950893
  0.94900000   1.90208117
  0.94910000   1.89930269
  0.94910000   2.55973277
  0.94910000   1.90210957
  0.94910000   2.56067005
  0.94910000   1.90030573
  0.94910000   2.56005257
  0.94910000   1.90146065
  0.94910000   2.56043326
  0.94910000   1.90072031
  0.94910000   2.56017581
  0.94910000   1.90119514
  0.94910000   2.56032883
  0.94910000   1.90089128
  0.94910000   2.56022008
  0.94910000   1.90108646
  0.94910000   2.56028020
  0.94910000   1.90096178
  0.94910000   2.56023306
  0.94910000   1.90104202
  0.94910000   2.56025547
  0.94910000   1.90099091
  0.94910000   2.56023403
  0.94910000   1.90102392
  0.94920000   1.89777889
  0.94920000   2.56029324
  0.94920000   1.90136473
  0.94920000   2.56150701
  0.94920000   1.89903458
  0.94920000   2.56070508
  0.94920000   1.90054054
  0.94920000   2.56120952
  0.94920000   1.89956465
  0.94920000   2.56086954
  0.94920000   1.90019655
  0.94920000   2.56107770
  0.94920000   1.89978775
  0.94920000   2.56093224
  0.94920000   1.90005280
  0.94920000   2.56101681
  0.94920000   1.89988159
  0.94920000   2.56095342
  0.94920000   1.89999276
  0.94920000   2.56098663
  0.94920000   1.89992109
  0.94920000   2.56095803
  0.94920000   1.89996774
  0.94930000   1.89659146
  0.94930000   2.56096580
  0.94930000   1.90040580
  0.94930000   2.56227063
  0.94930000   1.89790178
  0.94930000   2.56140139
  0.94930000   1.89953616
  0.94930000   2.56195515
  0.94930000   1.89846619
  0.94930000   2.56157962
  0.94930000   1.89916587
  0.94930000   2.56181322
  0.94930000   1.89870855
  0.94930000   2.56164973
  0.94930000   1.89900796
  0.94930000   2.56174701
  0.94930000   1.89881253
  0.94930000   2.56167473
  0.94930000   1.89894065
  0.94930000   2.56171415
  0.94930000   1.89885717
  0.94930000   2.56168125
  0.94930000   1.89891200
  0.94940000   1.89570272
  0.94940000   2.56174094
  0.94940000   1.89925077
  0.94940000   2.56296516
  0.94940000   1.89689942
  0.94940000   2.56214021
  0.94940000   1.89844990
  0.94940000   2.56267017
  0.94940000   1.89742492
  0.94940000   2.56230664
  0.94940000   1.89810194
  0.94940000   2.56253470
  0.94940000   1.89765506
  0.94940000   2.56237330
  0.94940000   1.89795056
  0.94940000   2.56247023
  0.94940000   1.89775576
  0.94940000   2.56239751
  0.94940000   1.89788473
  0.94940000   2.56243766
  0.94940000   1.89779985
  0.94940000   2.56240400
  0.94940000   1.89785615
  0.94950000   1.89507054
  0.94950000   2.56260602
  0.94950000   1.89792349
  0.94950000   2.56359666
  0.94950000   1.89601602
  0.94950000   2.56291872
  0.94950000   1.89728708
  0.94950000   2.56335559
  0.94950000   1.89643901
  0.94950000   2.56305052
  0.94950000   1.89700493
  0.94950000   2.56324184
  0.94950000   1.89662785
  0.94950000   2.56310340
  0.94950000   1.89687974
  0.94950000   2.56318602
  0.94950000   1.89671212
  0.94950000   2.56312218
  0.94950000   1.89682423
  0.94950000   2.56315685
  0.94950000   1.89674975
  0.94950000   2.56312655
  0.94950000   1.89679967
  0.94960000   1.89463875
  0.94960000   2.56354233
  0.94960000   1.89645948
  0.94960000   2.56417538
  0.94960000   1.89523220
  0.94960000   2.56373099
  0.94960000   1.89605897
  0.94960000   2.56401452
  0.94960000   1.89550256
  0.94960000   2.56380968
  0.94960000   1.89587782
  0.94960000   2.56393536
  0.94960000   1.89562561
  0.94960000   2.56383981
  0.94960000   1.89579590
  0.94960000   2.56389440
  0.94960000   1.89568162
  0.94960000   2.56384887
  0.94960000   1.89575891
  0.94960000   2.56387159
  0.94960000   1.89570715
  0.94960000   2.56384909
  0.94960000   1.89574225
  0.94970000   1.89433672
  0.94970000   2.56452517
  0.94970000   1.89490566
  0.94970000   2.56471605
  0.94970000   1.89451996
  0.94970000   2.56456768
  0.94970000   1.89478328
  0.94970000   2.56465250
  0.94970000   1.89460508
  0.94970000   2.56458080
  0.94970000   1.89472695
  0.94970000   2.56461719
  0.94970000   1.89464468
  0.94970000   2.56458147
  0.94970000   1.89470110
  0.94970000   2.56459596
  0.94970000   1.89466315
  0.94970000   2.56457731
  0.94970000   1.89468929
  0.94970000   2.56458203
  0.94970000   1.89467180
  0.94970000   2.56457159
  0.94970000   1.89468393
  0.94980000   1.89409008
  0.94980000   2.56552809
  0.94980000   1.89331237
  0.94980000   2.56523551
  0.94980000   1.89384732
  0.94980000   2.56541776
  0.94980000   1.89348104
  0.94980000   2.56527655
  0.94980000   1.89373326
  0.94980000   2.56535939
  0.94980000   1.89356083
  0.94980000   2.56529014
  0.94980000   1.89367974
  0.94980000   2.56532666
  0.94980000   1.89359861
  0.94980000   2.56529177
  0.94980000   1.89365469
  0.94980000   2.56530688
  0.94980000   1.89361654
  0.94980000   2.56528853
  0.94980000   1.89364300
  0.94980000   2.56529388
  0.94980000   1.89362509
  0.94990000   1.89383413
  0.94990000   2.56652792
  0.94990000   1.89172374
  0.94990000   2.56574932
  0.94990000   1.89318464
  0.94990000   2.56627072
  0.94990000   1.89217224
  0.94990000   2.56589362
  0.94990000   1.89287388
  0.94990000   2.56614088
  0.94990000   1.89238821
  0.94990000   2.56595723
  0.94990000   1.89272508
  0.94990000   2.56607344
  0.94990000   1.89249214
  0.94990000   2.56598310
  0.94990000   1.89265386
  0.94990000   2.56603683
  0.94990000   1.89254216
  0.94990000   2.56599162
  0.94990000   1.89261980
  0.94990000   2.56601566
  0.94990000   1.89256626
  0.95000000   1.89352178
  0.95000000   2.56750772
  0.95000000   1.89017211
  0.95000000   2.56626961
  0.95000000   1.89250887
  0.95000000   2.56711826
  0.95000000   1.89087275
  0.95000000   2.56650951
  0.95000000   1.89201593
  0.95000000   2.56692135
  0.95000000   1.89121659
  0.95000000   2.56662115
  0.95000000   1.89177560
  0.95000000   2.56682004
  0.95000000   1.89138509
  0.95000000   2.56667116
  0.95000000   1.89165837
  0.95000000   2.56676637
  0.95000000   1.89146762
  0.95000000   2.56669180
  0.95000000   1.89160122
  0.95000000   2.56673665
  0.95000000   1.89150806
  0.95010000   1.89312400
  0.95010000   2.56845693
  0.95010000   1.88867770
  0.95010000   2.56680458
  0.95010000   1.89180439
  0.95010000   2.56795460
  0.95010000   1.88959361
  0.95010000   2.56712845
  0.95010000   1.89115133
  0.95010000   2.56769783
  0.95010000   1.89005162
  0.95010000   2.56728401
  0.95010000   1.89082728
  0.95010000   2.56756502
  0.95010000   1.89028021
  0.95010000   2.56735696
  0.95010000   1.89066632
  0.95010000   2.56749486
  0.95010000   1.89039420
  0.95010000   2.56738957
  0.95010000   1.89058638
  0.95010000   2.56745654
  0.95010000   1.89045103
  0.95020000   1.89262511
  0.95020000   2.56936963
  0.95020000   1.88725181
  0.95020000   2.56735939
  0.95020000   1.89106134
  0.95020000   2.56877592
  0.95020000   1.88834212
  0.95020000   2.56775345
  0.95020000   1.89027437
  0.95020000   2.56846815
  0.95020000   1.88889745
  0.95020000   2.56794745
  0.95020000   1.88987701
  0.95020000   2.56830723
  0.95020000   1.88917969
  0.95020000   2.56804136
  0.95020000   1.88967611
  0.95020000   2.56822173
  0.95020000   1.88932298
  0.95020000   2.56808533
  0.95020000   1.88957450
  0.95020000   2.56817509
  0.95020000   1.88939569
  0.95030000   1.89201681
  0.95030000   2.57024242
  0.95030000   1.88590105
  0.95030000   2.56793755
  0.95030000   1.89027305
  0.95030000   2.56957951
  0.95030000   1.88712350
  0.95030000   2.56838686
  0.95030000   1.88938061
  0.95030000   2.56923056
  0.95030000   1.88775749
  0.95030000   2.56861287
  0.95030000   1.88892215
  0.95030000   2.56904566
  0.95030000   1.88808550
  0.95030000   2.56872513
  0.95030000   1.88868625
  0.95030000   2.56894644
  0.95030000   1.88825500
  0.95030000   2.56877950
  0.95030000   1.88856481
  0.95030000   2.56889204
  0.95030000   1.88834254
  0.95040000   1.89129306
  0.95040000   2.57107253
  0.95040000   1.88463072
  0.95040000   2.56854212
  0.95040000   1.88943364
  0.95040000   2.57036287
  0.95040000   1.88594258
  0.95040000   2.56903090
  0.95040000   1.88846578
  0.95040000   2.56998331
  0.95040000   1.88663506
  0.95040000   2.56928171
  0.95040000   1.88795996
  0.95040000   2.56977925
  0.95040000   1.88699970
  0.95040000   2.56940912
  0.95040000   1.88769514
  0.95040000   2.56966838
  0.95040000   1.88719146
  0.95040000   2.56947256
  0.95040000   1.88755641
  0.95040000   2.56960707
  0.95040000   1.88729222
  0.95050000   1.89044722
  0.95050000   2.57185678
  0.95050000   1.88344698
  0.95050000   2.56917651
  0.95050000   1.88853660
  0.95050000   2.57112315
  0.95050000   1.88480479
  0.95050000   2.56968813
  0.95050000   1.88752502
  0.95050000   2.57072439
  0.95050000   1.88553405
  0.95050000   2.56995566
  0.95050000   1.88698724
  0.95050000   2.57050671
  0.95050000   1.88592477
  0.95050000   2.57009438
  0.95050000   1.88670081
  0.95050000   2.57038680
  0.95050000   1.88613381
  0.95050000   2.57016512
  0.95050000   1.88654815
  0.95050000   2.57031974
  0.95050000   1.88624557
  0.95060000   1.88947110
  0.95060000   2.57259119
  0.95060000   1.88235748
  0.95060000   2.56984474
  0.95060000   1.88757426
  0.95060000   2.57185699
  0.95060000   1.88371663
  0.95060000   2.57036155
  0.95060000   1.88655261
  0.95060000   2.57145138
  0.95060000   1.88445910
  0.95060000   2.57063674
  0.95060000   1.88600013
  0.95060000   2.57122644
  0.95060000   1.88486373
  0.95060000   2.57078220
  0.95060000   1.88570082
  0.95060000   2.57110071
  0.95060000   1.88508393
  0.95060000   2.57085796
  0.95060000   1.88553854
  0.95060000   2.57102948
  0.95060000   1.88520368
  0.95070000   1.88835572
  0.95070000   2.57327121
  0.95070000   1.88137097
  0.95070000   2.57055128
  0.95070000   1.88653806
  0.95070000   2.57256052
  0.95070000   1.88268548
  0.95070000   2.57105459
  0.95070000   1.88554197
  0.95070000   2.57216146
  0.95070000   1.88341559
  0.95070000   2.57132733
  0.95070000   1.88499409
  0.95070000   2.57193658
  0.95070000   1.88382021
  0.95070000   2.57147412
  0.95070000   1.88469221
  0.95070000   2.57180892
  0.95070000   1.88404415
  0.95070000   2.57155208
  0.95070000   1.88452574
  0.95070000   2.57173557
  0.95070000   1.88416798
  0.95080000   1.88709303
  0.95080000   2.57389229
  0.95080000   1.88049618
  0.95080000   2.57130058
  0.95080000   1.88541947
  0.95080000   2.57322975
  0.95080000   1.88171902
  0.95080000   2.57177087
  0.95080000   1.88448623
  0.95080000   2.57285160
  0.95080000   1.88240938
  0.95080000   2.57203006
  0.95080000   1.88396413
  0.95080000   2.57263498
  0.95080000   1.88279831
  0.95080000   2.57217194
  0.95080000   1.88367158
  0.95080000   2.57251002
  0.95080000   1.88301715
  0.95080000   2.57224862
  0.95080000   1.88350755
  0.95080000   2.57243711
  0.95080000   1.88314020
  0.95090000   1.88567801
  0.95090000   2.57445071
  0.95090000   1.87974027
  0.95090000   2.57209642
  0.95090000   1.88421123
  0.95090000   2.57386098
  0.95090000   1.88082437
  0.95090000   2.57251381
  0.95090000   1.88337883
  0.95090000   2.57351878
  0.95090000   1.88144623
  0.95090000   2.57274758
  0.95090000   1.88290518
  0.95090000   2.57331943
  0.95090000   1.88180229
  0.95090000   2.57287756
  0.95090000   1.88263531
  0.95090000   2.57320247
  0.95090000   1.88200593
  0.95090000   2.57294889
  0.95090000   1.88248147
  0.95090000   2.57313306
  0.95090000   1.88212232
  0.95100000   1.88411061
  0.95100000   2.57494434
  0.95100000   1.87910738
  0.95100000   2.57294128
  0.95100000   1.88290860
  0.95100000   2.57445129
  0.95100000   1.88000711
  0.95100000   2.57328625
  0.95100000   1.88221433
  0.95100000   2.57416031
  0.95100000   1.88053133
  0.95100000   2.57348234
  0.95100000   1.88181254
  0.95100000   2.57398778
  0.95100000   1.88083629
  0.95100000   2.57359287
  0.95100000   1.88157980
  0.95100000   2.57388467
  0.95100000   1.88101353
  0.95100000   2.57365426
  0.95100000   1.88144492
  0.95100000   2.57382232
  0.95100000   1.88111648
  0.95110000   1.88239711
  0.95110000   2.57537330
  0.95110000   1.87859735
  0.95110000   2.57383575
  0.95110000   1.88151043
  0.95110000   2.57499905
  0.95110000   1.87927043
  0.95110000   2.57409005
  0.95110000   1.88098918
  0.95110000   2.57477413
  0.95110000   1.87966863
  0.95110000   2.57423636
  0.95110000   1.88068240
  0.95110000   2.57463813
  0.95110000   1.87990393
  0.95110000   2.57431960
  0.95110000   1.88050174
  0.95110000   2.57455511
  0.95110000   1.88004286
  0.95110000   2.57436608
  0.95110000   1.88039533
  0.95110000   2.57450375
  0.95110000   1.88012486
  0.95120000   1.88055040
  0.95120000   2.57574026
  0.95120000   1.87820512
  0.95120000   2.57477826
  0.95120000   1.88001970
  0.95120000   2.57550416
  0.95120000   1.87861456
  0.95120000   2.57492582
  0.95120000   1.87970221
  0.95120000   2.57535906
  0.95120000   1.87886043
  0.95120000   2.57501098
  0.95120000   1.87951219
  0.95120000   2.57526905
  0.95120000   1.87900797
  0.95120000   2.57505916
  0.95120000   1.87939845
  0.95120000   2.57521247
  0.95120000   1.87909646
  0.95120000   2.57508557
  0.95120000   1.87933037
  0.95120000   2.57517629
  0.95120000   1.87914953
  0.95130000   1.87858928
  0.95130000   2.57605044
  0.95130000   1.87792080
  0.95130000   2.57576506
  0.95130000   1.87844355
  0.95130000   2.57596817
  0.95130000   1.87803658
  0.95130000   2.57579283
  0.95130000   1.87835483
  0.95130000   2.57591492
  0.95130000   1.87810714
  0.95130000   2.57580674
  0.95130000   1.87830085
  0.95130000   2.57587967
  0.95130000   1.87815013
  0.95130000   2.57581255
  0.95130000   1.87826803
  0.95130000   2.57585572
  0.95130000   1.87817634
  0.95130000   2.57581376
  0.95130000   1.87824809
  0.95130000   2.57583897
  0.95130000   1.87819232
  0.95140000   1.87653687
  0.95140000   2.57631119
  0.95140000   1.87773043
  0.95140000   2.57679061
  0.95140000   1.87679256
  0.95140000   2.57639415
  0.95140000   1.87753068
  0.95140000   2.57668904
  0.95140000   1.87695088
  0.95140000   2.57644249
  0.95140000   1.87740723
  0.95140000   2.57662340
  0.95140000   1.87704887
  0.95140000   2.57646971
  0.95140000   1.87733096
  0.95140000   2.57658029
  0.95140000   1.87710950
  0.95140000   2.57648417
  0.95140000   1.87728385
  0.95140000   2.57655143
  0.95140000   1.87714701
  0.95140000   2.57649102
  0.95140000   1.87725476
  0.95150000   1.87441837
  0.95150000   2.57653127
  0.95150000   1.87761732
  0.95150000   2.57784814
  0.95150000   1.87507971
  0.95150000   2.57678631
  0.95150000   1.87708884
  0.95150000   2.57761146
  0.95150000   1.87549615
  0.95150000   2.57694343
  0.95150000   1.87675763
  0.95150000   2.57746000
  0.95150000   1.87575808
  0.95150000   2.57703945
  0.95150000   1.87654996
  0.95150000   2.57736246
  0.95150000   1.87592272
  0.95150000   2.57709743
  0.95150000   1.87641972
  0.95150000   2.57729910
  0.95150000   1.87602615
  0.95150000   2.57713183
  0.95150000   1.87633804
  0.95160000   1.87225884
  0.95160000   2.57672006
  0.95160000   1.87756361
  0.95160000   2.57893030
  0.95160000   1.87331902
  0.95160000   2.57714959
  0.95160000   1.87670170
  0.95160000   2.57855642
  0.95160000   1.87399761
  0.95160000   2.57741997
  0.95160000   1.87615408
  0.95160000   2.57831506
  0.95160000   1.87443132
  0.95160000   2.57758960
  0.95160000   1.87580578
  0.95160000   2.57815876
  0.95160000   1.87470825
  0.95160000   2.57769544
  0.95160000   1.87558411
  0.95160000   2.57805707
  0.95160000   1.87488494
  0.95160000   2.57776095
  0.95160000   1.87544300
  0.95170000   1.87008127
  0.95170000   2.57688671
  0.95170000   1.87755183
  0.95170000   2.58002991
  0.95170000   1.87152426
  0.95170000   2.57748909
  0.95170000   1.87635952
  0.95170000   2.57952005
  0.95170000   1.87246268
  0.95170000   2.57787464
  0.95170000   1.87559178
  0.95170000   2.57918681
  0.95170000   1.87307200
  0.95170000   2.57812114
  0.95170000   1.87509657
  0.95170000   2.57896866
  0.95170000   1.87346714
  0.95170000   2.57827832
  0.95170000   1.87477683
  0.95170000   2.57882546
  0.95170000   1.87372316
  0.95170000   2.57837809
  0.95170000   1.87457027
  0.95180000   1.86790528
  0.95180000   2.57703958
  0.95180000   1.87756611
  0.95180000   2.58114042
  0.95180000   1.86970797
  0.95180000   2.57780970
  0.95180000   1.87605299
  0.95180000   2.58049860
  0.95180000   1.87089856
  0.95180000   2.57831002
  0.95180000   1.87506583
  0.95180000   2.58007339
  0.95180000   1.87168365
  0.95180000   2.57863520
  0.95180000   1.87442024
  0.95180000   2.57979149
  0.95180000   1.87220065
  0.95180000   2.57884629
  0.95180000   1.87399745
  0.95180000   2.57960430
  0.95180000   1.87254077
  0.95180000   2.57898297
  0.95180000   1.87372034
  0.95190000   1.86574645
  0.95190000   2.57718573
  0.95190000   1.87759290
  0.95190000   2.58225627
  0.95190000   1.86788082
  0.95190000   2.57811578
  0.95190000   1.87577382
  0.95190000   2.58148870
  0.95190000   1.86931171
  0.95190000   2.57872850
  0.95190000   1.87457169
  0.95190000   2.58097307
  0.95190000   1.87026964
  0.95190000   2.57913283
  0.95190000   1.87377478
  0.95190000   2.58062660
  0.95190000   1.87091007
  0.95190000   2.57939961
  0.95190000   1.87324553
  0.95190000   2.58039359
  0.95190000   1.87133778
  0.95190000   2.57957540
  0.95190000   1.87289367
  0.95200000   1.86361638
  0.95200000   2.57733089
  0.95200000   1.87762132
  0.95200000   2.58337301
  0.95200000   1.86605136
  0.95200000   2.57841099
  0.95200000   1.87551504
  0.95200000   2.58248750
  0.95200000   1.86770761
  0.95200000   2.57913217
  0.95200000   1.87410541
  0.95200000   2.58188429
  0.95200000   1.86883293
  0.95200000   2.57961499
  0.95200000   1.87315836
  0.95200000   2.58147338
  0.95200000   1.86959656
  0.95200000   2.57993848
  0.95200000   1.87252068
  0.95200000   2.58119335
  0.95200000   1.87011416
  0.95200000   2.58015512
  0.95200000   1.87209073
  0.95210000   1.86152314
  0.95210000   2.57747944
  0.95210000   1.87764299
  0.95210000   2.58448722
  0.95210000   1.86422615
  0.95210000   2.57869828
  0.95210000   1.87527102
  0.95210000   2.58349270
  0.95210000   1.86609070
  0.95210000   2.57952274
  0.95210000   1.87366370
  0.95210000   2.58280578
  0.95210000   1.86737601
  0.95210000   2.58008247
  0.95210000   1.87256952
  0.95210000   2.58233136
  0.95210000   1.86826104
  0.95210000   2.58046303
  0.95210000   1.87182268
  0.95210000   2.58200366
  0.95210000   1.86886979
  0.95210000   2.58072183
  0.95210000   1.87131211
  0.95220000   1.85947199
  0.95220000   2.57763464
  0.95220000   1.87765167
  0.95220000   2.58559639
  0.95220000   1.86241004
  0.95220000   2.57897998
  0.95220000   1.87503730
  0.95220000   2.58450245
  0.95220000   1.86446450
  0.95220000   2.57990164
  0.95220000   1.87324388
  0.95220000   2.58373649
  0.95220000   1.86590089
  0.95220000   2.58053589
  0.95220000   1.87200706
  0.95220000   2.58320016
  0.95220000   1.86690426
  0.95220000   2.58097331
  0.95220000   1.87115146
  0.95220000   2.58282465
  0.95220000   1.86760444
  0.95220000   2.58127519
  0.95220000   1.87055849
  0.95230000   1.85746622
  0.95230000   2.57779894
  0.95230000   1.87764268
  0.95230000   2.58669863
  0.95230000   1.86060668
  0.95230000   2.57925796
  0.95230000   1.87481033
  0.95230000   2.58551530
  0.95230000   1.86283188
  0.95230000   2.58027003
  0.95230000   1.87284373
  0.95230000   2.58467554
  0.95230000   1.86440928
  0.95230000   2.58097579
  0.95230000   1.87147001
  0.95230000   2.58407951
  0.95230000   1.86552678
  0.95230000   2.58146929
  0.95230000   1.87050707
  0.95230000   2.58365649
  0.95230000   1.86631778
  0.95230000   2.58181480
  0.95230000   1.86983065
  0.95240000   1.85550804
  0.95240000   2.57797432
  0.95240000   1.87761222
  0.95240000   2.58779244
  0.95240000   1.85881899
  0.95240000   2.57953386
  0.95240000   1.87458700
  0.95240000   2.58652995
  0.95240000   1.86119532
  0.95240000   2.58062896
  0.95240000   1.87246125
  0.95240000   2.58562214
  0.95240000   1.86290270
  0.95240000   2.58140262
  0.95240000   1.87095750
  0.95240000   2.58496911
  0.95240000   1.86412916
  0.95240000   2.58195097
  0.95240000   1.86988957
  0.95240000   2.58449935
  0.95240000   1.86500952
  0.95240000   2.58234028
  0.95240000   1.86912934
  0.95250000   1.85359929
  0.95250000   2.57816262
  0.95250000   1.87755678
  0.95250000   2.58887641
  0.95250000   1.85704968
  0.95250000   2.57980925
  0.95250000   1.87436430
  0.95250000   2.58754515
  0.95250000   1.85955722
  0.95250000   2.58097954
  0.95250000   1.87209437
  0.95250000   2.58657547
  0.95250000   1.86138280
  0.95250000   2.58181693
  0.95250000   1.87046851
  0.95250000   2.58586864
  0.95250000   1.86271206
  0.95250000   2.58241839
  0.95250000   1.86929891
  0.95250000   2.58535336
  0.95250000   1.86367944
  0.95250000   2.58285126
  0.95250000   1.86845529
  0.95260000   1.85174215
  0.95260000   2.57836584
  0.95260000   1.87747250
  0.95260000   2.58994901
  0.95260000   1.85530172
  0.95260000   2.58008590
  0.95260000   1.87413886
  0.95260000   2.58855951
  0.95260000   1.85792034
  0.95260000   2.58132303
  0.95260000   1.87174066
  0.95260000   2.58753453
  0.95260000   1.85985149
  0.95260000   2.58221943
  0.95260000   1.87000168
  0.95260000   2.58677760
  0.95260000   1.86127645
  0.95260000   2.58287172
  0.95260000   1.86873473
  0.95260000   2.58621848
  0.95260000   1.86232762
  0.95260000   2.58334750
  0.95260000   1.86780897
  0.95270000   1.84993965
  0.95270000   2.57858645
  0.95270000   1.87735465
  0.95270000   2.59100833
  0.95270000   1.85357878
  0.95270000   2.58036598
  0.95270000   1.87390653
  0.95270000   2.58957128
  0.95270000   1.85628798
  0.95270000   2.58166107
  0.95270000   1.87139701
  0.95270000   2.58849802
  0.95270000   1.85831127
  0.95270000   2.58261115
  0.95270000   1.86955509
  0.95270000   2.58769524
  0.95270000   1.85982380
  0.95270000   2.58331141
  0.95270000   1.86819621
  0.95270000   2.58709449
  0.95270000   1.86095453
  0.95270000   2.58382894
  0.95270000   1.86719051
  0.95280000   1.84819616
  0.95280000   2.57882761
  0.95280000   1.87719715
  0.95280000   2.59205193
  0.95280000   1.85188556
  0.95280000   2.58065224
  0.95280000   1.87366204
  0.95280000   2.59057826
  0.95280000   1.85466443
  0.95280000   2.58199579
  0.95280000   1.87105934
  0.95280000   2.58946422
  0.95280000   1.85676547
  0.95280000   2.58299355
  0.95280000   1.86912593
  0.95280000   2.58862041
  0.95280000   1.85835633
  0.95280000   2.58373827
  0.95280000   1.86768182
  0.95280000   2.58798081
  0.95280000   1.85956127
  0.95280000   2.58429583
  0.95280000   1.86659946
  0.95290000   1.84651770
  0.95290000   2.57909342
  0.95290000   1.87699216
  0.95290000   2.59307661
  0.95290000   1.85022818
  0.95290000   2.58094823
  0.95290000   1.87339859
  0.95290000   2.59157760
  0.95290000   1.85305514
  0.95290000   2.58233004
  0.95290000   1.87072223
  0.95290000   2.59043083
  0.95290000   1.85521852
  0.95290000   2.58336868
  0.95290000   1.86871030
  0.95290000   2.58955146
  0.95290000   1.85687723
  0.95290000   2.58415362
  0.95290000   1.86718906
  0.95290000   2.58887645
  0.95290000   1.85814979
  0.95290000   2.58474881
  0.95290000   1.86603459
  0.95300000   1.84491227
  0.95300000   2.57938904
  0.95300000   1.87672972
  0.95300000   2.59407831
  0.95300000   1.84861443
  0.95300000   2.58125846
  0.95300000   1.87310755
  0.95300000   2.59256565
  0.95300000   1.85146712
  0.95300000   2.58266750
  0.95300000   1.87037863
  0.95300000   2.59139484
  0.95300000   1.85367621
  0.95300000   2.58373937
  0.95300000   1.86830280
  0.95300000   2.59048609
  0.95300000   1.85539092
  0.95300000   2.58455944
  0.95300000   1.86671416
  0.95300000   2.58977983
  0.95300000   1.85672312
  0.95300000   2.58518910
  0.95300000   1.86549361
  0.95310000   1.84339009
  0.95310000   2.57972092
  0.95310000   1.87639747
  0.95310000   2.59505191
  0.95310000   1.84705406
  0.95310000   2.58158857
  0.95310000   1.87277809
  0.95310000   2.59353782
  0.95310000   1.84990914
  0.95310000   2.58301288
  0.95310000   1.87001950
  0.95310000   2.59235234
  0.95310000   1.85214601
  0.95310000   2.58410937
  0.95310000   1.86789627
  0.95310000   2.59142119
  0.95310000   1.85390337
  0.95310000   2.58495852
  0.95310000   1.86625177
  0.95310000   2.59068864
  0.95310000   1.85528571
  0.95310000   2.58561863
  0.95310000   1.86497283
  0.95320000   1.84196375
  0.95320000   2.58009689
  0.95320000   1.87598037
  0.95320000   2.59599115
  0.95320000   1.84555907
  0.95320000   2.58194553
  0.95320000   1.87239686
  0.95320000   2.59448843
  0.95320000   1.84839208
  0.95320000   2.58337213
  0.95320000   1.86963347
  0.95320000   2.59329841
  0.95320000   1.85063738
  0.95320000   2.58448355
  0.95320000   1.86748138
  0.95320000   2.59235268
  0.95320000   1.85242240
  0.95320000   2.58535469
  0.95320000   1.86579458
  0.95320000   2.59159968
  0.95320000   1.85384369
  0.95320000   2.58604024
  0.95320000   1.86446683
  0.95330000   1.84064846
  0.95330000   2.58052628
  0.95330000   1.87546048
  0.95330000   2.59688843
  0.95330000   1.84414392
  0.95330000   2.58233775
  0.95330000   1.87194769
  0.95330000   2.59541052
  0.95330000   1.84692924
  0.95330000   2.58375262
  0.95330000   1.86920644
  0.95330000   2.59422688
  0.95330000   1.84916207
  0.95330000   2.58486813
  0.95330000   1.86704623
  0.95330000   2.59327531
  0.95330000   1.85095807
  0.95330000   2.58575305
  0.95330000   1.86533286
  0.95330000   2.59250865
  0.95330000   1.85240533
  0.95330000   2.58645792
  0.95330000   1.86396797
  0.95340000   1.83946215
  0.95340000   2.58102001
  0.95340000   1.87481684
  0.95340000   2.59773471
  0.95340000   1.84282587
  0.95340000   2.58277532
  0.95340000   1.87141127
  0.95340000   2.59629568
  0.95340000   1.84553664
  0.95340000   2.58416331
  0.95340000   1.86872116
  0.95340000   2.59513018
  0.95340000   1.84773459
  0.95340000   2.58527091
  0.95340000   1.86657586
  0.95340000   2.59418243
  0.95340000   1.84952310
  0.95340000   2.58616016
  0.95340000   1.86485401
  0.95340000   2.59340990
  0.95340000   1.85098142
  0.95340000   2.58687708
  0.95340000   1.86346594
  0.95350000   1.83842555
  0.95350000   2.58159062
  0.95350000   1.87402535
  0.95350000   2.59851935
  0.95350000   1.84162516
  0.95350000   2.58327008
  0.95350000   1.87076484
  0.95350000   2.59713387
  0.95350000   1.84423347
  0.95350000   2.58461506
  0.95350000   1.86815689
  0.95350000   2.59599907
  0.95350000   1.84637257
  0.95350000   2.58570154
  0.95350000   1.86605181
  0.95350000   2.59506575
  0.95350000   1.84813333
  0.95350000   2.58658444
  0.95350000   1.86434197
  0.95350000   2.59429617
  0.95350000   1.84958586
  0.95350000   2.58730484
  0.95350000   1.86294709
  0.95360000   1.83756230
  0.95360000   2.58225223
  0.95360000   1.87305888
  0.95360000   2.59923001
  0.95360000   1.84056534
  0.95360000   2.58383578
  0.95360000   1.86998203
  0.95360000   2.59791322
  0.95360000   1.84304234
  0.95360000   2.58512073
  0.95360000   1.86748890
  0.95360000   2.59682241
  0.95360000   1.84509727
  0.95360000   2.58617179
  0.95360000   1.86545150
  0.95360000   2.59591505
  0.95360000   1.84680828
  0.95360000   2.58703638
  0.95360000   1.86377658
  0.95360000   2.59515829
  0.95360000   1.84823619
  0.95360000   2.58775042
  0.95360000   1.86239378
  0.95370000   1.83689880
  0.95370000   2.58302044
  0.95370000   1.87188749
  0.95370000   2.59985253
  0.95370000   1.83967335
  0.95370000   2.58448811
  0.95370000   1.86903273
  0.95370000   2.59861982
  0.95370000   1.84198979
  0.95370000   2.58569546
  0.95370000   1.86668820
  0.95370000   2.59758688
  0.95370000   1.84393410
  0.95370000   2.58669584
  0.95370000   1.86474778
  0.95370000   2.59671784
  0.95370000   1.84557179
  0.95370000   2.58752902
  0.95370000   1.86313291
  0.95370000   2.59598475
  0.95370000   1.84695437
  0.95370000   2.58822553
  0.95370000   1.86178356
  0.95380000   1.83646396
  0.95380000   2.58391206
  0.95380000   1.87047894
  0.95380000   2.60037092
  0.95380000   1.83897966
  0.95380000   2.58524465
  0.95380000   1.86788322
  0.95380000   2.59923757
  0.95380000   1.84110649
  0.95380000   2.58635674
  0.95380000   1.86572125
  0.95380000   2.59827673
  0.95380000   1.84291310
  0.95380000   2.58729053
  0.95380000   1.86390835
  0.95380000   2.59745904
  0.95380000   1.84445267
  0.95380000   2.58807820
  0.95380000   1.86238058
  0.95380000   2.59676135
  0.95380000   1.84576752
  0.95380000   2.58874487
  0.95380000   1.86108834
  0.95390000   1.83628874
  0.95390000   2.58494462
  0.95390000   1.86879962
  0.95390000   2.60076744
  0.95390000   1.83851805
  0.95390000   2.58612465
  0.95390000   1.86649659
  0.95390000   2.59974810
  0.95390000   1.84042744
  0.95390000   2.58712437
  0.95390000   1.86455007
  0.95390000   2.59887355
  0.95390000   1.84206938
  0.95390000   2.58797553
  0.95390000   1.86289551
  0.95390000   2.59812059
  0.95390000   1.84348531
  0.95390000   2.58870297
  0.95390000   1.86148311
  0.95390000   2.59747074
  0.95390000   1.84470876
  0.95390000   2.58932648
  0.95390000   1.86027349
  0.95400000   1.83640529
  0.95400000   2.58613573
  0.95400000   1.86681588
  0.95400000   2.60102288
  0.95400000   1.83832517
  0.95400000   2.58714856
  0.95400000   1.86483372
  0.95400000   2.60013084
  0.95400000   1.83999186
  0.95400000   2.58802033
  0.95400000   1.86313259
  0.95400000   2.59935614
  0.95400000   1.84144333
  0.95400000   2.58877339
  0.95400000   1.86166611
  0.95400000   2.59868124
  0.95400000   1.84271029
  0.95400000   2.58942578
  0.95400000   1.86039751
  0.95400000   2.59809198
  0.95400000   1.84381803
  0.95400000   2.58999227
  0.95400000   1.85929711
  0.95410000   1.83684568
  0.95410000   2.58750207
  0.95410000   1.86449592
  0.95410000   2.60111704
  0.95410000   1.83843958
  0.95410000   2.58833722
  0.95410000   1.86285473
  0.95410000   2.60036332
  0.95410000   1.83984266
  0.95410000   2.58906815
  0.95410000   1.86142379
  0.95410000   2.59970061
  0.95410000   1.84108056
  0.95410000   2.58970919
  0.95410000   1.86017210
  0.95410000   2.59911634
  0.95410000   1.84217460
  0.95410000   2.59027244
  0.95410000   1.85907435
  0.95410000   2.59860023
  0.95410000   1.84314274
  0.95410000   2.59076815
  0.95410000   1.85810958
  0.95420000   1.83764022
  0.95420000   2.58905813
  0.95420000   1.86181222
  0.95420000   2.60102959
  0.95420000   1.83890021
  0.95420000   2.58971070
  0.95420000   1.86052142
  0.95420000   2.60042179
  0.95420000   1.84002521
  0.95420000   2.59029195
  0.95420000   1.85937760
  0.95420000   2.59988079
  0.95420000   1.84103106
  0.95420000   2.59080990
  0.95420000   1.85836195
  0.95420000   2.59939809
  0.95420000   1.84193137
  0.95420000   2.59127177
  0.95420000   1.85745855
  0.95420000   2.59896667
  0.95420000   1.84273791
  0.95420000   2.59168396
  0.95420000   1.85665382
  0.95430000   1.83881530
  0.95430000   2.59081476
  0.95430000   1.85874445
  0.95430000   2.60074123
  0.95430000   1.83974409
  0.95430000   2.59128662
  0.95430000   1.85780037
  0.95430000   2.60028235
  0.95430000   1.84058525
  0.95430000   2.59171486
  0.95430000   1.85695001
  0.95430000   2.59986911
  0.95430000   1.84134751
  0.95430000   2.59210294
  0.95430000   1.85618335
  0.95430000   2.59949609
  0.95430000   1.84203863
  0.95430000   2.59245443
  0.95430000   1.85549153
  0.95430000   2.59915884
  0.95430000   1.84266552
  0.95430000   2.59277273
  0.95430000   1.85486673
  0.95440000   1.84039084
  0.95440000   2.59277752
  0.95440000   1.85528258
  0.95440000   2.60023533
  0.95440000   1.84100333
  0.95440000   2.59307814
  0.95440000   1.85466690
  0.95440000   2.59992264
  0.95440000   1.84156579
  0.95440000   2.59335679
  0.95440000   1.85410330
  0.95440000   2.59963825
  0.95440000   1.84208232
  0.95440000   2.59361404
  0.95440000   1.85358741
  0.95440000   2.59937886
  0.95440000   1.84255668
  0.95440000   2.59385098
  0.95440000   1.85311509
  0.95440000   2.59914183
  0.95440000   1.84299236
  0.95440000   2.59406893
  0.95440000   1.85268256
  0.95450000   1.84237760
  0.95450000   2.59494512
  0.95450000   1.85142987
  0.95450000   2.59949982
  0.95450000   1.84270150
  0.95450000   2.59509169
  0.95450000   1.85110939
  0.95450000   2.59932404
  0.95450000   1.84300280
  0.95450000   2.59523172
  0.95450000   1.85081141
  0.95450000   2.59916352
  0.95450000   1.84328301
  0.95450000   2.59536417
  0.95450000   1.85053456
  0.95450000   2.59901618
  0.95450000   1.84354355
  0.95450000   2.59548874
  0.95450000   1.85027747
  0.95450000   2.59888051
  0.95450000   1.84378577
  0.95450000   2.59560546
  0.95450000   1.85003879
  0.95460000   1.84477470
  0.95460000   2.59730823
  0.95460000   1.84720517
  0.95460000   2.59852926
  0.95460000   1.84484975
  0.95460000   2.59732481
  0.95460000   1.84713354
  0.95460000   2.59847443
  0.95460000   1.84492013
  0.95460000   2.59734456
  0.95460000   1.84706578
  0.95460000   2.59842605
  0.95460000   1.84498622
  0.95460000   2.59736577
  0.95460000   1.84700186
  0.95460000   2.59838265
  0.95460000   1.84504830
  0.95460000   2.59738746
  0.95460000   1.84694164
  0.95460000   2.59834326
  0.95460000   1.84510665
  0.95460000   2.59740906
  0.95460000   1.84688496
  0.95470000   1.84756762
  0.95470000   2.59984885
  0.95470000   1.84264406
  0.95470000   2.59732669
  0.95470000   1.84744316
  0.95470000   2.59976448
  0.95470000   1.84276540
  0.95470000   2.59737094
  0.95470000   1.84732415
  0.95470000   2.59968843
  0.95470000   1.84288077
  0.95470000   2.59741651
  0.95470000   1.84721064
  0.95470000   2.59961879
  0.95470000   1.84299047
  0.95470000   2.59746213
  0.95470000   1.84710256
  0.95470000   2.59955440
  0.95470000   1.84309478
  0.95470000   2.59750706
  0.95470000   1.84699972
  0.95470000   2.59949446
  0.95470000   1.84319395
  0.95480000   1.85072722
  0.95480000   2.60254056
  0.95480000   1.83779825
  0.95480000   2.59590497
  0.95480000   1.85045815
  0.95480000   2.60238647
  0.95480000   1.83805257
  0.95480000   2.59602232
  0.95480000   1.85019914
  0.95480000   2.60224276
  0.95480000   1.83829698
  0.95480000   2.59613859
  0.95480000   1.84995028
  0.95480000   2.60210756
  0.95480000   1.83853175
  0.95480000   2.59625251
  0.95480000   1.84971141
  0.95480000   2.60197965
  0.95480000   1.83875720
  0.95480000   2.59636342
  0.95480000   1.84948227
  0.95480000   2.60185824
  0.95480000   1.83897365
  0.95490000   1.85421012
  0.95490000   2.60534977
  0.95490000   1.83273308
  0.95490000   2.59428714
  0.95490000   1.85385169
  0.95490000   2.60515611
  0.95490000   1.83306258
  0.95490000   2.59445026
  0.95490000   1.85350479
  0.95490000   2.60497329
  0.95490000   1.83338132
  0.95490000   2.59461148
  0.95490000   1.85316961
  0.95490000   2.60479945
  0.95490000   1.83368952
  0.95490000   2.59476952
  0.95490000   1.85284604
  0.95490000   2.60463343
  0.95490000   1.83398743
  0.95490000   2.59492373
  0.95490000   1.85253379
  0.95490000   2.60447440
  0.95490000   1.83427538
  0.95500000   1.85796049
  0.95500000   2.60823786
  0.95500000   1.82752331
  0.95500000   2.59250558
  0.95500000   1.85756277
  0.95500000   2.60803063
  0.95500000   1.82787830
  0.95500000   2.59268892
  0.95500000   1.85717677
  0.95500000   2.60783411
  0.95500000   1.82822275
  0.95500000   2.59287019
  0.95500000   1.85680283
  0.95500000   2.60764651
  0.95500000   1.82855680
  0.95500000   2.59304813
  0.95500000   1.85644083
  0.95500000   2.60746665
  0.95500000   1.82888071
  0.95500000   2.59322204
  0.95500000   1.85609049
  0.95500000   2.60729373
  0.95500000   1.82919478
  0.95510000   1.86191323
  0.95510000   2.61116400
  0.95510000   1.82224762
  0.95510000   2.59059992
  0.95510000   1.86151628
  0.95510000   2.61096269
  0.95510000   1.82259092
  0.95510000   2.59078265
  0.95510000   1.86113107
  0.95510000   2.61077198
  0.95510000   1.82292391
  0.95510000   2.59096325
  0.95510000   1.86075803
  0.95510000   2.61059010
  0.95510000   1.82324666
  0.95510000   2.59114043
  0.95510000   1.86039713
  0.95510000   2.61041590
  0.95510000   1.82355940
  0.95510000   2.59131350
  0.95510000   1.86004807
  0.95510000   2.61024855
  0.95510000   1.82386245
  0.95520000   1.86599814
  0.95520000   2.61408819
  0.95520000   1.81698273
  0.95520000   2.58861395
  0.95520000   1.86562884
  0.95520000   2.61390473
  0.95520000   1.81729172
  0.95520000   2.58878201
  0.95520000   1.86527142
  0.95520000   2.61373186
  0.95520000   1.81759038
  0.95520000   2.58894779
  0.95520000   1.86492647
  0.95520000   2.61356789
  0.95520000   1.81787871
  0.95520000   2.58910995
  0.95520000   1.86459403
  0.95520000   2.61341165
  0.95520000   1.81815690
  0.95520000   2.58926781
  0.95520000   1.86427381
  0.95520000   2.61326235
  0.95520000   1.81842528
  0.95530000   1.87014455
  0.95530000   2.61697405
  0.95530000   1.81179804
  0.95530000   2.58659204
  0.95530000   1.86981555
  0.95530000   2.61681303
  0.95530000   1.81206409
  0.95530000   2.58673883
  0.95530000   1.86949867
  0.95530000   2.61666268
  0.95530000   1.81231967
  0.95530000   2.58688313
  0.95530000   1.86919469
  0.95530000   2.61652132
  0.95530000   1.81256471
  0.95530000   2.58702355
  0.95530000   1.86890371
  0.95530000   2.61638784
  0.95530000   1.81279938
  0.95530000   2.58715941
  0.95530000   1.86862546
  0.95530000   2.61626140
  0.95530000   1.81302401
  0.95540000   1.87428574
  0.95540000   2.61979103
  0.95540000   1.80675146
  0.95540000   2.58457571
  0.95540000   1.87399664
  0.95540000   2.61965108
  0.95540000   1.80697729
  0.95540000   2.58470141
  0.95540000   1.87372007
  0.95540000   2.61952191
  0.95540000   1.80719245
  0.95540000   2.58482433
  0.95540000   1.87345693
  0.95540000   2.61940186
  0.95540000   1.80739681
  0.95540000   2.58494309
  0.95540000   1.87320737
  0.95540000   2.61928981
  0.95540000   1.80759058
  0.95540000   2.58505701
  0.95540000   1.87297107
  0.95540000   2.61918492
  0.95540000   1.80777410
  0.95550000   1.87836261
  0.95550000   2.62251570
  0.95550000   1.80188707
  0.95550000   2.58260084
  0.95550000   1.87810290
  0.95550000   2.62239146
  0.95550000   1.80208293
  0.95550000   2.58271066
  0.95550000   1.87785665
  0.95550000   2.62227828
  0.95550000   1.80226758
  0.95550000   2.58281721
  0.95550000   1.87762484
  0.95550000   2.62217449
  0.95550000   1.80244094
  0.95550000   2.58291912
  0.95550000   1.87740749
  0.95550000   2.62207891
  0.95550000   1.80260331
  0.95550000   2.58301579
  0.95550000   1.87720419
  0.95550000   2.62199065
  0.95550000   1.80275514
  0.95560000   1.88232623
  0.95560000   2.62513214
  0.95560000   1.79723446
  0.95560000   2.58069589
  0.95560000   1.88207912
  0.95560000   2.62501638
  0.95560000   1.79741408
  0.95560000   2.58079788
  0.95560000   1.88184775
  0.95560000   2.62491240
  0.95560000   1.79758113
  0.95560000   2.58089553
  0.95560000   1.88163289
  0.95560000   2.62481841
  0.95560000   1.79773575
  0.95560000   2.58098762
  0.95560000   1.88143429
  0.95560000   2.62473315
  0.95560000   1.79787844
  0.95560000   2.58107369
  0.95560000   1.88125125
  0.95560000   2.62465559
  0.95560000   1.79800986
  0.95570000   1.88613919
  0.95570000   2.62763153
  0.95570000   1.79280960
  0.95570000   2.57888121
  0.95570000   1.88588558
  0.95570000   2.62751694
  0.95570000   1.79298680
  0.95570000   2.57898411
  0.95570000   1.88565227
  0.95570000   2.62741557
  0.95570000   1.79314872
  0.95570000   2.57908063
  0.95570000   1.88543940
  0.95570000   2.62732541
  0.95570000   1.79329596
  0.95570000   2.57916988
  0.95570000   1.88524611
  0.95570000   2.62724493
  0.95570000   1.79342944
  0.95570000   2.57925173
  0.95570000   1.88507106
  0.95570000   2.62717292
  0.95570000   1.79355024
  0.95580000   1.88977574
  0.95580000   2.63001121
  0.95580000   1.78861680
  0.95580000   2.57716934
  0.95580000   1.88949754
  0.95580000   2.62989165
  0.95580000   1.78880312
  0.95580000   2.57728085
  0.95580000   1.88924739
  0.95580000   2.62978770
  0.95580000   1.78896970
  0.95580000   2.57738268
  0.95580000   1.88902408
  0.95580000   2.62969687
  0.95580000   1.78911802
  0.95580000   2.57747459
  0.95580000   1.88882551
  0.95580000   2.62961723
  0.95580000   1.78924975
  0.95580000   2.57755695
  0.95580000   1.88864933
  0.95580000   2.62954725
  0.95580000   1.78936658
  0.95590000   1.89322088
  0.95590000   2.63227336
  0.95590000   1.78465116
  0.95590000   2.57556593
  0.95590000   1.89290352
  0.95590000   2.63214458
  0.95590000   1.78485460
  0.95590000   2.57569170
  0.95590000   1.89262560
  0.95590000   2.63203475
  0.95590000   1.78503205
  0.95590000   2.57580314
  0.95590000   1.89238353
  0.95590000   2.63194063
  0.95590000   1.78518635
  0.95590000   2.57590101
  0.95590000   1.89217327
  0.95590000   2.63185971
  0.95590000   1.78532032
  0.95590000   2.57598653
  0.95590000   1.89199086
  0.95590000   2.63178996
  0.95590000   1.78543657
  0.95600000   1.89646903
  0.95600000   2.63442372
  0.95600000   1.78090123
  0.95600000   2.57407111
  0.95600000   1.89610275
  0.95600000   2.63428349
  0.95600000   1.78112592
  0.95600000   2.57421430
  0.95600000   1.89579092
  0.95600000   2.63416638
  0.95600000   1.78131680
  0.95600000   2.57433728
  0.95600000   1.89552633
  0.95600000   2.63406811
  0.95600000   1.78147870
  0.95600000   2.57444227
  0.95600000   1.89530213
  0.95600000   2.63398536
  0.95600000   1.78161597
  0.95600000   2.57453162
  0.95600000   1.89511218
  0.95600000   2.63391546
  0.95600000   1.78173237
  0.95610000   1.89952211
  0.95610000   2.63647027
  0.95610000   1.77735132
  0.95610000   2.57268091
  0.95610000   1.89910239
  0.95610000   2.63631825
  0.95610000   1.77759786
  0.95610000   2.57284224
  0.95610000   1.89875522
  0.95610000   2.63619408
  0.95610000   1.77780175
  0.95610000   2.57297660
  0.95610000   1.89846842
  0.95610000   2.63609215
  0.95610000   1.77797034
  0.95610000   2.57308810
  0.95610000   1.89823146
  0.95610000   2.63600812
  0.95610000   1.77810984
  0.95610000   2.57318050
  0.95610000   1.89803548
  0.95610000   2.63593859
  0.95610000   1.77822541
  0.95620000   1.90238772
  0.95620000   2.63842225
  0.95620000   1.77398355
  0.95620000   2.57138865
  0.95620000   1.90191498
  0.95620000   2.63825958
  0.95620000   1.77424974
  0.95620000   2.57156678
  0.95620000   1.90153502
  0.95620000   2.63812975
  0.95620000   1.77446401
  0.95620000   2.57171074
  0.95620000   1.90122944
  0.95620000   2.63802551
  0.95620000   1.77463674
  0.95620000   2.57182692
  0.95620000   1.90098326
  0.95620000   2.63794141
  0.95620000   1.77477622
  0.95620000   2.57192068
  0.95620000   1.90078451
  0.95620000   2.63787325
  0.95620000   1.77488910
  0.95630000   1.90507741
  0.95630000   2.64028930
  0.95630000   1.77077936
  0.95630000   2.57018605
  0.95630000   1.90455616
  0.95630000   2.64011820
  0.95630000   1.77106100
  0.95630000   2.57037811
  0.95630000   1.90414896
  0.95630000   2.63998479
  0.95630000   1.77128175
  0.95630000   2.57052885
  0.95630000   1.90383004
  0.95630000   2.63988004
  0.95630000   1.77145524
  0.95630000   2.57064721
  0.95630000   1.90357949
  0.95630000   2.63979732
  0.95630000   1.77159198
  0.95630000   2.57074026
  0.95630000   1.90338201
  0.95630000   2.63973164
  0.95630000   1.77170012
  0.95640000   1.90760509
  0.95640000   2.64208087
  0.95640000   1.76772059
  0.95640000   2.56906416
  0.95640000   1.90704297
  0.95640000   2.64190420
  0.95640000   1.76801237
  0.95640000   2.56926630
  0.95640000   1.90661597
  0.95640000   2.64176960
  0.95640000   1.76823509
  0.95640000   2.56942048
  0.95640000   1.90629020
  0.95640000   2.64166625
  0.95640000   1.76840580
  0.95640000   2.56953831
  0.95640000   1.90604054
  0.95640000   2.64158633
  0.95640000   1.76853718
  0.95640000   2.56962857
  0.95640000   1.90584835
  0.95640000   2.64152411
  0.95640000   1.76863872
  0.95650000   1.90998585
  0.95650000   2.64380590
  0.95650000   1.76479022
  0.95650000   2.56801399
  0.95650000   1.90939256
  0.95650000   2.64362673
  0.95650000   1.76508636
  0.95650000   2.56822190
  0.95650000   1.90895414
  0.95650000   2.64349334
  0.95650000   1.76530659
  0.95650000   2.56837608
  0.95650000   1.90862819
  0.95650000   2.64339314
  0.95650000   1.76547125
  0.95650000   2.56849080
  0.95650000   1.90838443
  0.95650000   2.64331723
  0.95650000   1.76559503
  0.95650000   2.56857646
  0.95650000   1.90820107
  0.95650000   2.64325924
  0.95650000   1.76568860
  0.95660000   1.91223502
  0.95660000   2.64547251
  0.95660000   1.76197276
  0.95660000   2.56702699
  0.95660000   1.91162133
  0.95660000   2.64529389
  0.95660000   1.76226758
  0.95660000   2.56723628
  0.95660000   1.91117998
  0.95660000   2.64516391
  0.95660000   1.76248125
  0.95660000   2.56738725
  0.95660000   1.91086010
  0.95660000   2.64506833
  0.95660000   1.76263715
  0.95660000   2.56749665
  0.95660000   1.91062657
  0.95660000   2.64499731
  0.95660000   1.76275168
  0.95660000   2.56757628
  0.95660000   1.91045482
  0.95660000   2.64494402
  0.95660000   1.76283641
  0.95670000   1.91436744
  0.95670000   2.64708795
  0.95670000   1.75925443
  0.95670000   2.56609527
  0.95670000   1.91374436
  0.95670000   2.64691268
  0.95670000   1.75954274
  0.95670000   2.56630183
  0.95670000   1.91330810
  0.95670000   2.64678795
  0.95670000   1.75974644
  0.95670000   2.56644680
  0.95670000   1.91299974
  0.95670000   2.64669809
  0.95670000   1.75989155
  0.95670000   2.56654912
  0.95670000   1.91277985
  0.95670000   2.64663255
  0.95670000   1.75999579
  0.95670000   2.56662175
  0.95670000   1.91262164
  0.95670000   2.64658416
  0.95670000   1.76007133
  0.95680000   1.91639705
  0.95680000   2.64865857
  0.95680000   1.75662320
  0.95680000   2.56521179
  0.95680000   1.91577519
  0.95680000   2.64848906
  0.95680000   1.75690053
  0.95680000   2.56541198
  0.95680000   1.91535113
  0.95680000   2.64837102
  0.95680000   1.75709162
  0.95680000   2.56554868
  0.95680000   1.91505869
  0.95680000   2.64828762
  0.95680000   1.75722460
  0.95680000   2.56564268
  0.95680000   1.91485488
  0.95680000   2.64822782
  0.95680000   1.75731809
  0.95680000   2.56570777
  0.95680000   1.91471128
  0.95680000   2.64818428
  0.95680000   1.75738453
  0.95690000   1.91833662
  0.95690000   2.65018985
  0.95690000   1.75406870
  0.95690000   2.56437038
  0.95690000   1.91772570
  0.95690000   2.65002806
  0.95690000   1.75433146
  0.95690000   2.56456113
  0.95690000   1.91731979
  0.95690000   2.64991771
  0.95690000   1.75450810
  0.95690000   2.56468790
  0.95690000   1.91704655
  0.95690000   2.64984115
  0.95690000   1.75462825
  0.95690000   2.56477284
  0.95690000   1.91686029
  0.95690000   2.64978708
  0.95690000   1.75471102
  0.95690000   2.56483023
  0.95690000   1.91673161
  0.95690000   2.64974817
  0.95690000   1.75476881
  0.95700000   1.92019758
  0.95700000   2.65168644
  0.95700000   1.75158211
  0.95700000   2.56356571
  0.95700000   1.91960609
  0.95700000   2.65153385
  0.95700000   1.75182760
  0.95700000   2.56374464
  0.95700000   1.91922303
  0.95700000   2.65143180
  0.95700000   1.75198869
  0.95700000   2.56386037
  0.95700000   1.91897117
  0.95700000   2.65136216
  0.95700000   1.75209590
  0.95700000   2.56393594
  0.95700000   1.91880305
  0.95700000   2.65131361
  0.95700000   1.75216836
  0.95700000   2.56398580
  0.95700000   1.91868899
  0.95700000   2.65127898
  0.95700000   1.75221818
  0.95710000   1.92199001
  0.95710000   2.65315231
  0.95710000   1.74915599
  0.95710000   2.56279328
  0.95710000   1.92142506
  0.95710000   2.65300991
  0.95710000   1.74938237
  0.95710000   2.56295864
  0.95710000   1.92106825
  0.95710000   2.65291641
  0.95710000   1.74952749
  0.95710000   2.56306276
  0.95710000   1.92083892
  0.95710000   2.65285353
  0.95710000   1.74962211
  0.95710000   2.56312905
  0.95710000   1.92068882
  0.95710000   2.65281013
  0.95710000   1.74968497
  0.95710000   2.56317178
  0.95710000   1.92058860
  0.95710000   2.65277934
  0.95710000   1.74972765
  0.95720000   1.92372266
  0.95720000   2.65459074
  0.95720000   1.74678409
  0.95720000   2.56204931
  0.95720000   1.92318985
  0.95720000   2.65445912
  0.95720000   1.74699035
  0.95720000   2.56220000
  0.95720000   1.92286150
  0.95720000   2.65437412
  0.95720000   1.74711964
  0.95720000   2.56229238
  0.95720000   1.92265495
  0.95720000   2.65431763
  0.95720000   1.74720235
  0.95720000   2.56234976
  0.95720000   1.92252216
  0.95720000   2.65427891
  0.95720000   1.74725651
  0.95720000   2.56238594
  0.95720000   1.92243467
  0.95720000   2.65425148
  0.95720000   1.74729294
  0.95730000   1.92540300
  0.95730000   2.65600451
  0.95730000   1.74446122
  0.95730000   2.56133067
  0.95730000   1.92490650
  0.95730000   2.65588385
  0.95730000   1.74464705
  0.95730000   2.56146616
  0.95730000   1.92460767
  0.95730000   2.65580703
  0.95730000   1.74476110
  0.95730000   2.56154705
  0.95730000   1.92442344
  0.95730000   2.65575644
  0.95730000   1.74483285
  0.95730000   2.56159612
  0.95730000   1.92430682
  0.95730000   2.65572188
  0.95730000   1.74487929
  0.95730000   2.56162642
  0.95730000   1.92423075
  0.95730000   2.65569734
  0.95730000   1.74491036
  0.95740000   1.92703739
  0.95740000   2.65739590
  0.95740000   1.74218305
  0.95740000   2.56063480
  0.95740000   1.92657994
  0.95740000   2.65728606
  0.95740000   1.74234875
  0.95740000   2.56075504
  0.95740000   1.92631074
  0.95740000   2.65721695
  0.95740000   1.74244849
  0.95740000   2.56082501
  0.95740000   1.92614777
  0.95740000   2.65717169
  0.95740000   1.74251036
  0.95740000   2.56086650
  0.95740000   1.92604590
  0.95740000   2.65714073
  0.95740000   1.74255011
  0.95740000   2.56089166
  0.95740000   1.92597984
  0.95740000   2.65711862
  0.95740000   1.74257667
  0.95750000   1.92863111
  0.95750000   2.65876681
  0.95750000   1.73994602
  0.95750000   2.55995961
  0.95750000   1.92821417
  0.95750000   2.65866740
  0.95750000   1.74009236
  0.95750000   2.56006499
  0.95750000   1.92797391
  0.95750000   2.65860537
  0.95750000   1.74017896
  0.95750000   2.56012479
  0.95750000   1.92783071
  0.95750000   2.65856481
  0.95750000   1.74023211
  0.95750000   2.56015952
  0.95750000   1.92774199
  0.95750000   2.65853694
  0.95750000   1.74026614
  0.95750000   2.56018026
  0.95750000   1.92768455
  0.95750000   2.65851684
  0.95750000   1.74028899
  0.95760000   1.93018855
  0.95760000   2.66011881
  0.95760000   1.73774715
  0.95760000   2.55930343
  0.95760000   1.92981242
  0.95760000   2.66002923
  0.95760000   1.73787529
  0.95760000   2.55939463
  0.95760000   1.92959975
  0.95760000   2.65997359
  0.95760000   1.73795005
  0.95760000   2.55944519
  0.95760000   1.92947455
  0.95760000   2.65993711
  0.95760000   1.73799565
  0.95760000   2.55947402
  0.95760000   1.92939734
  0.95760000   2.65991183
  0.95760000   1.73802490
  0.95760000   2.55949103
  0.95760000   1.92934717
  0.95760000   2.65989337
  0.95760000   1.73804470
  0.95770000   1.93171326
  0.95770000   2.66145321
  0.95770000   1.73558399
  0.95770000   2.55866489
  0.95770000   1.93137728
  0.95770000   2.66137270
  0.95770000   1.73569533
  0.95770000   2.55874287
  0.95770000   1.93119037
  0.95770000   2.66132272
  0.95770000   1.73575964
  0.95770000   2.55878519
  0.95770000   1.93108125
  0.95770000   2.66128972
  0.95770000   1.73579880
  0.95770000   2.55880896
  0.95770000   1.93101391
  0.95770000   2.66126659
  0.95770000   1.73582409
  0.95770000   2.55882287
  0.95770000   1.93096977
  0.95770000   2.66124945
  0.95770000   1.73584146
  0.95780000   1.93320813
  0.95780000   2.66277110
  0.95780000   1.73345449
  0.95780000   2.55804292
  0.95780000   1.93291082
  0.95780000   2.66269882
  0.95780000   1.73355061
  0.95780000   2.55810881
  0.95780000   1.93274749
  0.95780000   2.66265376
  0.95780000   1.73360583
  0.95780000   2.55814391
  0.95780000   1.93265246
  0.95780000   2.66262369
  0.95780000   1.73363959
  0.95780000   2.55816340
  0.95780000   1.93259346
  0.95780000   2.66260230
  0.95780000   1.73366167
  0.95780000   2.55817479
  0.95780000   1.93255426
  0.95780000   2.66258622
  0.95780000   1.73367709
  0.95790000   1.93467545
  0.95790000   2.66407338
  0.95790000   1.73135691
  0.95790000   2.55743665
  0.95790000   1.93441469
  0.95790000   2.66400845
  0.95790000   1.73143949
  0.95790000   2.55749168
  0.95790000   1.93427255
  0.95790000   2.66396761
  0.95790000   1.73148693
  0.95790000   2.55752056
  0.95790000   1.93418966
  0.95790000   2.66393996
  0.95790000   1.73151623
  0.95790000   2.55753650
  0.95790000   1.93413759
  0.95790000   2.66391997
  0.95790000   1.73153571
  0.95790000   2.55754585
  0.95790000   1.93410237
  0.95790000   2.66390473
  0.95790000   1.73154959
  0.95800000   1.93611702
  0.95800000   2.66536085
  0.95800000   1.72928979
  0.95800000   2.55684539
  0.95800000   1.93589019
  0.95800000   2.66530236
  0.95800000   1.72936049
  0.95800000   2.55689082
  0.95800000   1.93576679
  0.95800000   2.66526507
  0.95800000   1.72940139
  0.95800000   2.55691444
  0.95800000   1.93569418
  0.95800000   2.66523940
  0.95800000   1.72942705
  0.95800000   2.55692748
  0.95800000   1.93564778
  0.95800000   2.66522054
  0.95800000   1.72944447
  0.95800000   2.55693521
  0.95800000   1.93561573
  0.95800000   2.66520596
  0.95800000   1.72945712
  0.95810000   1.93753425
  0.95810000   2.66663417
  0.95810000   1.72725185
  0.95810000   2.55626856
  0.95810000   1.93733841
  0.95810000   2.66658123
  0.95810000   1.72731231
  0.95810000   2.55630567
  0.95810000   1.93723129
  0.95810000   2.66654690
  0.95810000   1.72734779
  0.95810000   2.55632490
  0.95810000   1.93716724
  0.95810000   2.66652282
  0.95810000   1.72737051
  0.95810000   2.55633561
  0.95810000   1.93712542
  0.95810000   2.66650486
  0.95810000   1.72738629
  0.95810000   2.55634205
  0.95810000   1.93709588
  0.95810000   2.66649081
  0.95810000   1.72739798
  0.95820000   1.93892822
  0.95820000   2.66789392
  0.95820000   1.72524198
  0.95820000   2.55570571
  0.95820000   1.93876023
  0.95820000   2.66784571
  0.95820000   1.72529376
  0.95820000   2.55573571
  0.95820000   1.93866700
  0.95820000   2.66781380
  0.95820000   1.72532479
  0.95820000   2.55575135
  0.95820000   1.93860999
  0.95820000   2.66779100
  0.95820000   1.72534517
  0.95820000   2.55576019
  0.95820000   1.93857181
  0.95820000   2.66777374
  0.95820000   1.72535965
  0.95820000   2.55576562
  0.95820000   1.93854425
  0.95820000   2.66776011
  0.95820000   1.72537057
  0.95830000   1.94029976
  0.95830000   2.66914064
  0.95830000   1.72325919
  0.95830000   2.55515643
  0.95830000   1.94015638
  0.95830000   2.66909638
  0.95830000   1.72330371
  0.95830000   2.55518046
  0.95830000   1.94007483
  0.95830000   2.66906642
  0.95830000   1.72333116
  0.95830000   2.55519320
  0.95830000   1.94002350
  0.95830000   2.66904463
  0.95830000   1.72334968
  0.95830000   2.55520056
  0.95830000   1.93998820
  0.95830000   2.66902794
  0.95830000   1.72336313
  0.95830000   2.55520520
  0.95830000   1.93996220
  0.95830000   2.66901466
  0.95830000   1.72337342
  0.95840000   1.94164950
  0.95840000   2.67037480
  0.95840000   1.72130257
  0.95840000   2.55462036
  0.95840000   1.94152754
  0.95840000   2.67033380
  0.95840000   1.72134112
  0.95840000   2.55463947
  0.95840000   1.94145562
  0.95840000   2.67030539
  0.95840000   1.72136571
  0.95840000   2.55464990
  0.95840000   1.94140881
  0.95840000   2.67028441
  0.95840000   1.72138277
  0.95840000   2.55465611
  0.95840000   1.94137578
  0.95840000   2.67026817
  0.95840000   1.72139538
  0.95840000   2.55466013
  0.95840000   1.94135101
  0.95840000   2.67025517
  0.95840000   1.72140517
  0.95850000   1.94297795
  0.95850000   2.67159685
  0.95850000   1.71937127
  0.95850000   2.55409719
  0.95850000   1.94287429
  0.95850000   2.67155848
  0.95850000   1.71940500
  0.95850000   2.55411232
  0.95850000   1.94281017
  0.95850000   2.67153131
  0.95850000   1.71942733
  0.95850000   2.55412093
  0.95850000   1.94276693
  0.95850000   2.67151096
  0.95850000   1.71944323
  0.95850000   2.55412624
  0.95850000   1.94273566
  0.95850000   2.67149509
  0.95850000   1.71945518
  0.95850000   2.55412976
  0.95850000   1.94271187
  0.95850000   2.67148232
  0.95850000   1.71946453
  0.95860000   1.94428550
  0.95860000   2.67280721
  0.95860000   1.71746450
  0.95860000   2.55358661
  0.95860000   1.94419720
  0.95860000   2.67277093
  0.95860000   1.71749440
  0.95860000   2.55359858
  0.95860000   1.94413928
  0.95860000   2.67274472
  0.95860000   1.71751497
  0.95860000   2.55360578
  0.95860000   1.94409880
  0.95860000   2.67272489
  0.95860000   1.71752994
  0.95860000   2.55361039
  0.95860000   1.94406893
  0.95860000   2.67270932
  0.95860000   1.71754134
  0.95860000   2.55361350
  0.95860000   1.94404593
  0.95860000   2.67269676
  0.95860000   1.71755032
  0.95870000   1.94557249
  0.95870000   2.67400627
  0.95870000   1.71558151
  0.95870000   2.55308833
  0.95870000   1.94549680
  0.95870000   2.67397163
  0.95870000   1.71560842
  0.95870000   2.55309784
  0.95870000   1.94544372
  0.95870000   2.67394618
  0.95870000   1.71562761
  0.95870000   2.55310396
  0.95870000   1.94540536
  0.95870000   2.67392676
  0.95870000   1.71564184
  0.95870000   2.55310801
  0.95870000   1.94537659
  0.95870000   2.67391145
  0.95870000   1.71565277
  0.95870000   2.55311079
  0.95870000   1.94535424
  0.95870000   2.67389906
  0.95870000   1.71566143
  0.95880000   1.94683922
  0.95880000   2.67519443
  0.95880000   1.71372158
  0.95880000   2.55260206
  0.95880000   1.94677364
  0.95880000   2.67516104
  0.95880000   1.71374618
  0.95880000   2.55260971
  0.95880000   1.94672423
  0.95880000   2.67513618
  0.95880000   1.71376430
  0.95880000   2.55261500
  0.95880000   1.94668750
  0.95880000   2.67511709
  0.95880000   1.71377792
  0.95880000   2.55261860
  0.95880000   1.94665961
  0.95880000   2.67510201
  0.95880000   1.71378845
  0.95880000   2.55262110
  0.95880000   1.94663782
  0.95880000   2.67508979
  0.95880000   1.71379682
  0.95890000   1.94808598
  0.95890000   2.67637205
  0.95890000   1.71188399
  0.95890000   2.55212753
  0.95890000   1.94802825
  0.95890000   2.67633961
  0.95890000   1.71190687
  0.95890000   2.55213379
  0.95890000   1.94798155
  0.95890000   2.67631521
  0.95890000   1.71192414
  0.95890000   2.55213845
  0.95890000   1.94794607
  0.95890000   2.67629641
  0.95890000   1.71193724
  0.95890000   2.55214168
  0.95890000   1.94791891
  0.95890000   2.67628153
  0.95890000   1.71194742
  0.95890000   2.55214394
  0.95890000   1.94789761
  0.95890000   2.67626945
  0.95890000   1.71195554
  0.95900000   1.94931304
  0.95900000   2.67753951
  0.95900000   1.71006806
  0.95900000   2.55166443
  0.95900000   1.94926115
  0.95900000   2.67750776
  0.95900000   1.71008967
  0.95900000   2.55166970
  0.95900000   1.94921640
  0.95900000   2.67748373
  0.95900000   1.71010627
  0.95900000   2.55167387
  0.95900000   1.94918190
  0.95900000   2.67746518
  0.95900000   1.71011893
  0.95900000   2.55167679
  0.95900000   1.94915535
  0.95900000   2.67745047
  0.95900000   1.71012879
  0.95900000   2.55167883
  0.95900000   1.94913448
  0.95900000   2.67743853
  0.95900000   1.71013666
  0.95910000   1.95052069
  0.95910000   2.67869715
  0.95910000   1.70827313
  0.95910000   2.55121248
  0.95910000   1.95047289
  0.95910000   2.67866591
  0.95910000   1.70829383
  0.95910000   2.55121706
  0.95910000   1.95042950
  0.95910000   2.67864219
  0.95910000   1.70830988
  0.95910000   2.55122084
  0.95910000   1.95039576
  0.95910000   2.67862385
  0.95910000   1.70832215
  0.95910000   2.55122350
  0.95910000   1.95036974
  0.95910000   2.67860930
  0.95910000   1.70833172
  0.95910000   2.55122534
  0.95910000   1.95034927
  0.95910000   2.67859749
  0.95910000   1.70833936
  0.95920000   1.95170922
  0.95920000   2.67984532
  0.95920000   1.70649856
  0.95920000   2.55077140
  0.95920000   1.95166400
  0.95920000   2.67981444
  0.95920000   1.70651860
  0.95920000   2.55077552
  0.95920000   1.95162151
  0.95920000   2.67979098
  0.95920000   1.70653419
  0.95920000   2.55077899
  0.95920000   1.95158841
  0.95920000   2.67977284
  0.95920000   1.70654610
  0.95920000   2.55078140
  0.95920000   1.95156287
  0.95920000   2.67975845
  0.95920000   1.70655540
  0.95920000   2.55078306
  0.95920000   1.95154276
  0.95920000   2.67974676
  0.95920000   1.70656284
  0.95930000   1.95287894
  0.95930000   2.68098436
  0.95930000   1.70474372
  0.95930000   2.55034090
  0.95930000   1.95283501
  0.95930000   2.68095374
  0.95930000   1.70476329
  0.95930000   2.55034473
  0.95930000   1.95279312
  0.95930000   2.68093051
  0.95930000   1.70477847
  0.95930000   2.55034792
  0.95930000   1.95276055
  0.95930000   2.68091256
  0.95930000   1.70479006
  0.95930000   2.55035012
  0.95930000   1.95273546
  0.95930000   2.68089831
  0.95930000   1.70479910
  0.95930000   2.55035161
  0.95930000   1.95271568
  0.95930000   2.68088672
  0.95930000   1.70480634
  0.95940000   1.95403014
  0.95940000   2.68211460
  0.95940000   1.70300801
  0.95940000   2.54992069
  0.95940000   1.95398648
  0.95940000   2.68208416
  0.95940000   1.70302724
  0.95940000   2.54992433
  0.95940000   1.95394495
  0.95940000   2.68206114
  0.95940000   1.70304205
  0.95940000   2.54992728
  0.95940000   1.95391287
  0.95940000   2.68204337
  0.95940000   1.70305332
  0.95940000   2.54992928
  0.95940000   1.95388819
  0.95940000   2.68202925
  0.95940000   1.70306213
  0.95940000   2.54993061
  0.95940000   1.95386874
  0.95940000   2.68201778
  0.95940000   1.70306918
  0.95950000   1.95516315
  0.95950000   2.68323635
  0.95950000   1.70129082
  0.95950000   2.54951050
  0.95950000   1.95511891
  0.95950000   2.68320606
  0.95950000   1.70130979
  0.95950000   2.54951402
  0.95950000   1.95507764
  0.95950000   2.68318324
  0.95950000   1.70132425
  0.95950000   2.54951674
  0.95950000   1.95504600
  0.95950000   2.68316563
  0.95950000   1.70133524
  0.95950000   2.54951854
  0.95950000   1.95502171
  0.95950000   2.68315164
  0.95950000   1.70134381
  0.95950000   2.54951973
  0.95950000   1.95500256
  0.95950000   2.68314027
  0.95950000   1.70135069
  0.95960000   1.95627829
  0.95960000   2.68434992
  0.95960000   1.69959161
  0.95960000   2.54911004
  0.95960000   1.95623283
  0.95960000   2.68431977
  0.95960000   1.69961035
  0.95960000   2.54911347
  0.95960000   1.95619175
  0.95960000   2.68429714
  0.95960000   1.69962447
  0.95960000   2.54911598
  0.95960000   1.95616056
  0.95960000   2.68427968
  0.95960000   1.69963518
  0.95960000   2.54911759
  0.95960000   1.95613664
  0.95960000   2.68426581
  0.95960000   1.69964354
  0.95960000   2.54911863
  0.95960000   1.95611777
  0.95960000   2.68425453
  0.95960000   1.69965025
  0.95970000   1.95737588
  0.95970000   2.68545561
  0.95970000   1.69790981
  0.95970000   2.54871906
  0.95970000   1.95732876
  0.95970000   2.68542559
  0.95970000   1.69792833
  0.95970000   2.54872239
  0.95970000   1.95728787
  0.95970000   2.68540314
  0.95970000   1.69794212
  0.95970000   2.54872468
  0.95970000   1.95725711
  0.95970000   2.68538584
  0.95970000   1.69795256
  0.95970000   2.54872612
  0.95970000   1.95723355
  0.95970000   2.68537209
  0.95970000   1.69796073
  0.95970000   2.54872703
  0.95970000   1.95721495
  0.95970000   2.68536090
  0.95970000   1.69796728
  0.95980000   1.95845623
  0.95980000   2.68655371
  0.95980000   1.69624491
  0.95980000   2.54833727
  0.95980000   1.95840720
  0.95980000   2.68652383
  0.95980000   1.69626318
  0.95980000   2.54834049
  0.95980000   1.95836653
  0.95980000   2.68650157
  0.95980000   1.69627665
  0.95980000   2.54834257
  0.95980000   1.95833620
  0.95980000   2.68648440
  0.95980000   1.69628684
  0.95980000   2.54834384
  0.95980000   1.95831298
  0.95980000   2.68647077
  0.95980000   1.69629481
  0.95980000   2.54834462
  0.95980000   1.95829464
  0.95980000   2.68645966
  0.95980000   1.69630122
  0.95990000   1.95951968
  0.95990000   2.68764450
  0.95990000   1.69459639
  0.95990000   2.54796442
  0.95990000   1.95946863
  0.95990000   2.68761477
  0.95990000   1.69461438
  0.95990000   2.54796750
  0.95990000   1.95942825
  0.95990000   2.68759269
  0.95990000   1.69462754
  0.95990000   2.54796937
  0.95990000   1.95939835
  0.95990000   2.68757567
  0.95990000   1.69463749
  0.95990000   2.54797047
  0.95990000   1.95937546
  0.95990000   2.68756213
  0.95990000   1.69464528
  0.95990000   2.54797114
  0.95990000   1.95935736
  0.95990000   2.68755111
  0.95990000   1.69465154
  0.96000000   1.96056651
  0.96000000   2.68872825
  0.96000000   1.69296375
  0.96000000   2.54760027
  0.96000000   1.96051353
  0.96000000   2.68869870
  0.96000000   1.69298144
  0.96000000   2.54760316
  0.96000000   1.96047353
  0.96000000   2.68867679
  0.96000000   1.69299429
  0.96000000   2.54760482
  0.96000000   1.96044404
  0.96000000   2.68865990
  0.96000000   1.69300401
  0.96000000   2.54760577
  0.96000000   1.96042146
  0.96000000   2.68864647
  0.96000000   1.69301162
  0.96000000   2.54760632
  0.96000000   1.96040359
  0.96000000   2.68863552
  0.96000000   1.69301775
  0.96010000   1.96159701
  0.96010000   2.68980521
  0.96010000   1.69134654
  0.96010000   2.54724455
  0.96010000   1.96154238
  0.96010000   2.68977586
  0.96010000   1.69136388
  0.96010000   2.54724722
  0.96010000   1.96150282
  0.96010000   2.68975412
  0.96010000   1.69137643
  0.96010000   2.54724867
  0.96010000   1.96147374
  0.96010000   2.68973735
  0.96010000   1.69138593
  0.96010000   2.54724948
  0.96010000   1.96145146
  0.96010000   2.68972402
  0.96010000   1.69139338
  0.96010000   2.54724993
  0.96010000   1.96143380
  0.96010000   2.68971315
  0.96010000   1.69139938
  0.96020000   1.96261139
  0.96020000   2.69087564
  0.96020000   1.68974430
  0.96020000   2.54689703
  0.96020000   1.96255561
  0.96020000   2.69084650
  0.96020000   1.68976125
  0.96020000   2.54689945
  0.96020000   1.96251657
  0.96020000   2.69082493
  0.96020000   1.68977351
  0.96020000   2.54690071
  0.96020000   1.96248789
  0.96020000   2.69080828
  0.96020000   1.68978281
  0.96020000   2.54690138
  0.96020000   1.96246588
  0.96020000   2.69079503
  0.96020000   1.68979010
  0.96020000   2.54690172
  0.96020000   1.96244844
  0.96020000   2.69078423
  0.96020000   1.68979598
  0.96030000   1.96360978
  0.96030000   2.69193978
  0.96030000   1.68815657
  0.96030000   2.54655749
  0.96030000   1.96355369
  0.96030000   2.69191087
  0.96030000   1.68817313
  0.96030000   2.54655962
  0.96030000   1.96351520
  0.96030000   2.69188945
  0.96030000   1.68818512
  0.96030000   2.54656070
  0.96030000   1.96348689
  0.96030000   2.69187291
  0.96030000   1.68819422
  0.96030000   2.54656124
  0.96030000   1.96346515
  0.96030000   2.69185975
  0.96030000   1.68820136
  0.96030000   2.54656148
  0.96030000   1.96344791
  0.96030000   2.69184903
  0.96030000   1.68820712
  0.96040000   1.96459222
  0.96040000   2.69299788
  0.96040000   1.68658294
  0.96040000   2.54622567
  0.96040000   1.96453707
  0.96040000   2.69296918
  0.96040000   1.68659911
  0.96040000   2.54622754
  0.96040000   1.96449911
  0.96040000   2.69294790
  0.96040000   1.68661085
  0.96040000   2.54622844
  0.96040000   1.96447115
  0.96040000   2.69293148
  0.96040000   1.68661975
  0.96040000   2.54622885
  0.96040000   1.96444966
  0.96040000   2.69291840
  0.96040000   1.68662675
  0.96040000   2.54622901
  0.96040000   1.96443261
  0.96040000   2.69290774
  0.96040000   1.68663240
  0.96050000   1.96555853
  0.96050000   2.69405018
  0.96050000   1.68502296
  0.96050000   2.54590134
  0.96050000   1.96550619
  0.96050000   2.69402165
  0.96050000   1.68503882
  0.96050000   2.54590299
  0.96050000   1.96546866
  0.96050000   2.69400051
  0.96050000   1.68505031
  0.96050000   2.54590372
  0.96050000   1.96544104
  0.96050000   2.69398419
  0.96050000   1.68505903
  0.96050000   2.54590402
  0.96050000   1.96541980
  0.96050000   2.69397120
  0.96050000   1.68506590
  0.96050000   2.54590409
  0.96050000   1.96540292
  0.96050000   2.69396060
  0.96050000   1.68507143
  0.96060000   1.96650836
  0.96060000   2.69509692
  0.96060000   1.68347622
  0.96060000   2.54558423
  0.96060000   1.96646156
  0.96060000   2.69506847
  0.96060000   1.68349189
  0.96060000   2.54558580
  0.96060000   1.96642421
  0.96060000   2.69504748
  0.96060000   1.68350314
  0.96060000   2.54558636
  0.96060000   1.96639692
  0.96060000   2.69503125
  0.96060000   1.68351169
  0.96060000   2.54558655
  0.96060000   1.96637591
  0.96060000   2.69501833
  0.96060000   1.68351842
  0.96060000   2.54558654
  0.96060000   1.96635921
  0.96060000   2.69500780
  0.96060000   1.68352386
  0.96070000   1.96744115
  0.96070000   2.69613836
  0.96070000   1.68194225
  0.96070000   2.54527408
  0.96070000   1.96740371
  0.96070000   2.69610984
  0.96070000   1.68195799
  0.96070000   2.54527579
  0.96070000   1.96736606
  0.96070000   2.69608899
  0.96070000   1.68196898
  0.96070000   2.54527618
  0.96070000   1.96733914
  0.96070000   2.69607286
  0.96070000   1.68197737
  0.96070000   2.54527626
  0.96070000   1.96731833
  0.96070000   2.69606002
  0.96070000   1.68198398
  0.96070000   2.54527617
  0.96070000   1.96730180
  0.96070000   2.69604954
  0.96070000   1.68198931
  0.96080000   1.96835616
  0.96080000   2.69717478
  0.96080000   1.68042059
  0.96080000   2.54497057
  0.96080000   1.96833324
  0.96080000   2.69714594
  0.96080000   1.68043681
  0.96080000   2.54497283
  0.96080000   1.96829449
  0.96080000   2.69712525
  0.96080000   1.68044751
  0.96080000   2.54497300
  0.96080000   1.96826802
  0.96080000   2.69710921
  0.96080000   1.68045575
  0.96080000   2.54497299
  0.96080000   1.96824741
  0.96080000   2.69709643
  0.96080000   1.68046224
  0.96080000   2.54497281
  0.96080000   1.96823104
  0.96080000   2.69708601
  0.96080000   1.68046747
  0.96090000   1.96925271
  0.96090000   2.69820645
  0.96090000   1.67891074
  0.96090000   2.54467336
  0.96090000   1.96925081
  0.96090000   2.69817690
  0.96090000   1.67892807
  0.96090000   2.54467678
  0.96090000   1.96920975
  0.96090000   2.69815644
  0.96090000   1.67893839
  0.96090000   2.54467665
  0.96090000   1.96918388
  0.96090000   2.69814047
  0.96090000   1.67894651
  0.96090000   2.54467656
  0.96090000   1.96916343
  0.96090000   2.69812776
  0.96090000   1.67895287
  0.96090000   2.54467631
  0.96090000   1.96914722
  0.96090000   2.69811740
  0.96090000   1.67895802
  0.96100000   1.97013053
  0.96100000   2.69923366
  0.96100000   1.67741223
  0.96100000   2.54438213
  0.96100000   1.97015704
  0.96100000   2.69920289
  0.96100000   1.67743152
  0.96100000   2.54438754
  0.96100000   1.97011203
  0.96100000   2.69918273
  0.96100000   1.67744132
  0.96100000   2.54438696
  0.96100000   1.97008705
  0.96100000   2.69916682
  0.96100000   1.67744933
  0.96100000   2.54438681
  0.96100000   1.97006671
  0.96100000   2.69915418
  0.96100000   1.67745558
  0.96100000   2.54438649
  0.96100000   1.97005065
  0.96100000   2.69914386
  0.96100000   1.67746064
  0.96110000   1.97099051
  0.96110000   2.70025663
  0.96110000   1.67592467
  0.96110000   2.54409662
  0.96110000   1.97105244
  0.96110000   2.70022403
  0.96110000   1.67594691
  0.96110000   2.54410500
  0.96110000   1.97100151
  0.96110000   2.70020431
  0.96110000   1.67595598
  0.96110000   2.54410376
  0.96110000   1.97097783
  0.96110000   2.70018842
  0.96110000   1.67596394
  0.96110000   2.54410362
  0.96110000   1.97095751
  0.96110000   2.70017585
  0.96110000   1.67597007
  0.96110000   2.54410321
  0.96110000   1.97094162
  0.96110000   2.70016559
  0.96110000   1.67597504
  0.96120000   1.97183584
  0.96120000   2.70127545
  0.96120000   1.67444788
  0.96120000   2.54381678
  0.96120000   1.97193709
  0.96120000   2.70124048
  0.96120000   1.67447398
  0.96120000   2.54382905
  0.96120000   1.97187841
  0.96120000   2.70122134
  0.96120000   1.67448208
  0.96120000   2.54382691
  0.96120000   1.97185653
  0.96120000   2.70120543
  0.96120000   1.67449006
  0.96120000   2.54382682
  0.96120000   1.97183609
  0.96120000   2.70119294
  0.96120000   1.67449605
  0.96120000   2.54382632
  0.96120000   1.97182039
  0.96120000   2.70118272
  0.96120000   1.67450095
  0.96130000   1.97267377
  0.96130000   2.70228994
  0.96130000   1.67298217
  0.96130000   2.54354303
  0.96130000   1.97281015
  0.96130000   2.70225243
  0.96130000   1.67301241
  0.96130000   2.54355948
  0.96130000   1.97274311
  0.96130000   2.70223397
  0.96130000   1.67301936
  0.96130000   2.54355625
  0.96130000   1.97272339
  0.96130000   2.70221801
  0.96130000   1.67302742
  0.96130000   2.54355629
  0.96130000   1.97270272
  0.96130000   2.70220560
  0.96130000   1.67303327
  0.96130000   2.54355569
  0.96130000   1.97268724
  0.96130000   2.70219542
  0.96130000   1.67303810
  0.96140000   1.97351785
  0.96140000   2.70329939
  0.96140000   1.67152868
  0.96140000   2.54327662
  0.96140000   1.97366909
  0.96140000   2.70326018
  0.96140000   1.67156167
  0.96140000   2.54329590
  0.96140000   1.97359639
  0.96140000   2.70324232
  0.96140000   1.67156761
  0.96140000   2.54329171
  0.96140000   1.97357859
  0.96140000   2.70322630
  0.96140000   1.67157575
  0.96140000   2.54329188
  0.96140000   1.97355765
  0.96140000   2.70321398
  0.96140000   1.67158146
  0.96140000   2.54329117
  0.96140000   1.97354239
  0.96140000   2.70320384
  0.96140000   1.67158623
  0.96150000   1.97439053
  0.96150000   2.70430226
  0.96150000   1.67008997
  0.96150000   2.54302021
  0.96150000   1.97450865
  0.96150000   2.70426428
  0.96150000   1.67012087
  0.96150000   2.54303755
  0.96150000   1.97443977
  0.96150000   2.70424646
  0.96150000   1.67012671
  0.96150000   2.54303330
  0.96150000   1.97442208
  0.96150000   2.70423047
  0.96150000   1.67013479
  0.96150000   2.54303345
  0.96150000   1.97440119
  0.96150000   2.70421822
  0.96150000   1.67014039
  0.96150000   2.54303266
  0.96150000   1.97438609
  0.96150000   2.70420811
  0.96150000   1.67014508
  0.96160000   1.97532514
  0.96160000   2.70529577
  0.96160000   1.66867057
  0.96160000   2.54277847
  0.96160000   1.97531948
  0.96160000   2.70526565
  0.96160000   1.66868848
  0.96160000   2.54278300
  0.96160000   1.97527606
  0.96160000   2.70524632
  0.96160000   1.66869678
  0.96160000   2.54278123
  0.96160000   1.97525342
  0.96160000   2.70523071
  0.96160000   1.66870422
  0.96160000   2.54278078
  0.96160000   1.97523372
  0.96160000   2.70521844
  0.96160000   1.66870983
  0.96160000   2.54278003
  0.96160000   1.97521852
  0.96160000   2.70520839
  0.96160000   1.66871443
  0.96170000   1.97636555
  0.96170000   2.70627562
  0.96170000   1.66727760
  0.96170000   2.54255870
  0.96170000   1.97608702
  0.96170000   2.70626578
  0.96170000   1.66726204
  0.96170000   2.54252990
  0.96170000   1.97610992
  0.96170000   2.70624164
  0.96170000   1.66727821
  0.96170000   2.54253603
  0.96170000   1.97607155
  0.96170000   2.70622726
  0.96170000   1.66728362
  0.96170000   2.54253358
  0.96170000   1.97605581
  0.96170000   2.70621476
  0.96170000   1.66728961
  0.96170000   2.54253325
  0.96170000   1.97603981
  0.96170000   2.70620481
  0.96170000   1.66729403
  0.96180000   1.97756007
  0.96180000   2.70723595
  0.96180000   1.66592069
  0.96180000   2.54237078
  0.96180000   1.97679152
  0.96180000   2.70726681
  0.96180000   1.66583804
  0.96180000   2.54227481
  0.96180000   1.97694825
  0.96180000   2.70723190
  0.96180000   1.66587188
  0.96180000   2.54229867
  0.96180000   1.97687451
  0.96180000   2.70722046
  0.96180000   1.66587244
  0.96180000   2.54229141
  0.96180000   1.97686836
  0.96180000   2.70720723
  0.96180000   1.66587960
  0.96180000   2.54229228
  0.96180000   1.97684996
  0.96180000   2.70719753
  0.96180000   1.66588363
  0.96190000   1.97894455
  0.96190000   2.70817049
  0.96190000   1.66461018
  0.96190000   2.54222547
  0.96190000   1.97741153
  0.96190000   2.70827132
  0.96190000   1.66441225
  0.96190000   2.54201349
  0.96190000   1.97779944
  0.96190000   2.70821631
  0.96190000   1.66447906
  0.96190000   2.54207057
  0.96190000   1.97765945
  0.96190000   2.70821074
  0.96190000   1.66446995
  0.96190000   2.54205361
  0.96190000   1.97767263
  0.96190000   2.70819589
  0.96190000   1.66447979
  0.96190000   2.54205720
  0.96190000   1.97764882
  0.96190000   2.70818670
  0.96190000   1.66448297
  0.96200000   1.98050716
  0.96200000   2.70907608
  0.96200000   1.66335125
  0.96200000   2.54212839
  0.96200000   1.97793571
  0.96200000   2.70928128
  0.96200000   1.66298149
  0.96200000   2.54174274
  0.96200000   1.97866995
  0.96200000   2.70919409
  0.96200000   1.66310105
  0.96200000   2.54185316
  0.96200000   1.97842351
  0.96200000   2.70919861
  0.96200000   1.66307534
  0.96200000   2.54181948
  0.96200000   1.97847005
  0.96200000   2.70918070
  0.96200000   1.66309018
  0.96200000   2.54182814
  0.96200000   1.97843611
  0.96200000   2.70917249
  0.96200000   1.66309174
  0.96210000   1.98212695
  0.96210000   2.70996120
  0.96210000   1.66212989
  0.96210000   2.54206588
  0.96210000   1.97839128
  0.96210000   2.71029527
  0.96210000   1.66154814
  0.96210000   2.54146493
  0.96210000   1.97955506
  0.96210000   2.71016538
  0.96210000   1.66173759
  0.96210000   2.54164635
  0.96210000   1.97916686
  0.96210000   2.71018432
  0.96210000   1.66168818
  0.96210000   2.54158864
  0.96210000   1.97926132
  0.96210000   2.71016169
  0.96210000   1.66171076
  0.96210000   2.54160517
  0.96210000   1.97921167
  0.96210000   2.71015507
  0.96210000   1.66170969
  0.96220000   1.98347996
  0.96220000   2.71086175
  0.96220000   1.66088697
  0.96220000   2.54197843
  0.96220000   1.97889692
  0.96220000   2.71130299
  0.96220000   1.66012912
  0.96220000   2.54119719
  0.96220000   1.98042060
  0.96220000   2.71113335
  0.96220000   1.66038346
  0.96220000   2.54144497
  0.96220000   1.97989978
  0.96220000   2.71116715
  0.96220000   1.66030968
  0.96220000   2.54136241
  0.96220000   1.98004385
  0.96220000   2.71113919
  0.96220000   1.66034096
  0.96220000   2.54138785
  0.96220000   1.97997641
  0.96220000   2.71113451
  0.96220000   1.66033671
  0.96230000   1.98391498
  0.96230000   2.71186137
  0.96230000   1.65948498
  0.96230000   2.54172623
  0.96230000   1.97973173
  0.96230000   2.71227691
  0.96230000   1.65876949
  0.96230000   2.54098550
  0.96230000   1.98117478
  0.96230000   2.71210791
  0.96230000   1.65902243
  0.96230000   2.54123263
  0.96230000   1.98065498
  0.96230000   2.71214390
  0.96230000   1.65894508
  0.96230000   2.54114620
  0.96230000   1.98080679
  0.96230000   2.71211442
  0.96230000   1.65897879
  0.96230000   2.54117421
  0.96230000   1.98073419
  0.96230000   2.71211056
  0.96230000   1.65897321
  0.96240000   1.98231861
  0.96240000   2.71309516
  0.96240000   1.65770337
  0.96240000   2.54108301
  0.96240000   1.98134805
  0.96240000   2.71316461
  0.96240000   1.65755497
  0.96240000   2.54091784
  0.96240000   1.98164180
  0.96240000   2.71310959
  0.96240000   1.65762094
  0.96240000   2.54097504
  0.96240000   1.98150098
  0.96240000   2.71310693
  0.96240000   1.65760688
  0.96240000   2.54095290
  0.96240000   1.98152443
  0.96240000   2.71309042
  0.96240000   1.65761930
  0.96240000   2.54095930
  0.96240000   1.98149491
  0.96240000   2.71308223
  0.96240000   1.65762080
  0.96250000   1.97701826
  0.96250000   2.71467415
  0.96250000   1.65536646
  0.96250000   2.53986444
  0.96250000   1.98411557
  0.96250000   2.71390145
  0.96250000   1.65659133
  0.96250000   2.54110360
  0.96250000   1.98160295
  0.96250000   2.71416504
  0.96250000   1.65613566
  0.96250000   2.54062753
  0.96250000   1.98252714
  0.96250000   2.71404480
  0.96250000   1.65631376
  0.96250000   2.54080186
  0.96250000   1.98215804
  0.96250000   2.71407208
  0.96250000   1.65625451
  0.96250000   2.54073500
  0.96250000   1.98227485
  0.96250000   2.71404766
  0.96250000   1.65628252
  0.96260000   1.96580894
  0.96260000   2.71641606
  0.96260000   1.65279048
  0.96260000   2.53838861
  0.96260000   1.98740149
  0.96260000   2.71452616
  0.96260000   1.65581551
  0.96260000   2.54147996
  0.96260000   1.98118343
  0.96260000   2.71526215
  0.96260000   1.65458699
  0.96260000   2.54021022
  0.96260000   1.98369352
  0.96260000   2.71495908
  0.96260000   1.65506304
  0.96260000   2.54069073
  0.96260000   1.98271225
  0.96260000   2.71505990
  0.96260000   1.65488367
  0.96260000   2.54050049
  0.96260000   1.98307561
  0.96260000   2.71500639
  0.96260000   1.65495913
  0.96270000   1.94622468
  0.96270000   2.71728449
  0.96270000   1.65170288
  0.96270000   2.53844071
  0.96270000   1.98763938
  0.96270000   2.71554162
  0.96270000   1.65440383
  0.96270000   2.54120280
  0.96270000   1.98207023
  0.96270000   2.71621654
  0.96270000   1.65327551
  0.96270000   2.54003197
  0.96270000   1.98438280
  0.96270000   2.71592441
  0.96270000   1.65373284
  0.96270000   2.54049456
  0.96270000   1.98343679
  0.96270000   2.71602511
  0.96270000   1.65355380
  0.96270000   2.54030410
  0.96270000   1.98380065
  0.96270000   2.71596982
  0.96270000   1.65363199
  0.96280000   1.91618049
  0.96280000   2.71469691
  0.96280000   1.65639420
  0.96280000   2.54444480
  0.96280000   1.97598804
  0.96280000   2.71790382
  0.96280000   1.65081050
  0.96280000   2.53866941
  0.96280000   1.98747159
  0.96280000   2.71658441
  0.96280000   1.65292434
  0.96280000   2.54084064
  0.96280000   1.98309917
  0.96280000   2.71713001
  0.96280000   1.65201559
  0.96280000   2.53989530
  0.96280000   1.98496803
  0.96280000   2.71688514
  0.96280000   1.65239929
  0.96280000   2.54028486
  0.96280000   1.98417187
  0.96280000   2.71697365
  0.96280000   1.65224309
  0.96290000   1.87502347
  0.96290000   2.70447679
  0.96290000   1.67402981
  0.96290000   2.56334596
  0.96290000   1.93867523
  0.96290000   2.71889070
  0.96290000   1.64960015
  0.96290000   2.53859340
  0.96290000   1.98797250
  0.96290000   2.71756448
  0.96290000   1.65158062
  0.96290000   2.54062537
  0.96290000   1.98386431
  0.96290000   2.71808848
  0.96290000   1.65070584
  0.96290000   2.53971184
  0.96290000   1.98566886
  0.96290000   2.71784261
  0.96290000   1.65109005
  0.96290000   2.54010289
  0.96290000   1.98486902
  0.96290000   2.71793484
  0.96290000   1.65092783
  0.96300000   1.82474129
  0.96300000   2.68265744
  0.96300000   1.71233123
  0.96300000   2.60053153
  0.96300000   1.86581350
  0.96300000   2.70210824
  0.96300000   1.67834477
  0.96300000   2.56873982
  0.96300000   1.92825962
  0.96300000   2.71880899
  0.96300000   1.65003001
  0.96300000   2.54020377
  0.96300000   1.98506425
  0.96300000   2.71899391
  0.96300000   1.64949099
  0.96300000   2.53962449
  0.96300000   1.98618058
  0.96300000   2.71882371
  0.96300000   1.64974768
  0.96300000   2.53988331
  0.96300000   1.98564282
  0.96300000   2.71888287
  0.96300000   1.64963849
  0.96310000   1.77056638
  0.96310000   2.64907646
  0.96310000   1.77363511
  0.96310000   2.65128790
  0.96310000   1.76951375
  0.96310000   2.64828851
  0.96310000   1.77506527
  0.96310000   2.65229679
  0.96310000   1.76761618
  0.96310000   2.64687993
  0.96310000   1.77766089
  0.96310000   2.65412894
  0.96310000   1.76420722
  0.96310000   2.64433664
  0.96310000   1.78238484
  0.96310000   2.65742204
  0.96310000   1.75812249
  0.96310000   2.63972127
  0.96310000   1.79101322
  0.96310000   2.66326334
  0.96310000   1.74741047
  0.96310000   2.63133940
  0.96310000   1.80681095
  0.96320000   1.71996307
  0.96320000   2.60963589
  0.96320000   1.84876800
  0.96320000   2.69710354
  0.96320000   1.68756126
  0.96320000   2.57999419
  0.96320000   1.90664700
  0.96320000   2.71712696
  0.96320000   1.65346197
  0.96320000   2.54610681
  0.96320000   1.97394342
  0.96320000   2.72227629
  0.96320000   1.64470516
  0.96320000   2.53697768
  0.96320000   1.99216166
  0.96320000   2.72001636
  0.96320000   1.64832716
  0.96320000   2.54075200
  0.96320000   1.98457797
  0.96320000   2.72112588
  0.96320000   1.64651493
  0.96320000   2.53885626
  0.96320000   1.98835806
  0.96330000   1.67987800
  0.96330000   2.57378539
  0.96330000   1.91926040
  0.96330000   2.72077603
  0.96330000   1.64769812
  0.96330000   2.54131095
  0.96330000   1.98389164
  0.96330000   2.72232267
  0.96330000   1.64489236
  0.96330000   2.53835186
  0.96330000   1.98976317
  0.96330000   2.72146102
  0.96330000   1.64625711
  0.96330000   2.53977033
  0.96330000   1.98689447
  0.96330000   2.72187113
  0.96330000   1.64557698
  0.96330000   2.53905164
  0.96330000   1.98831493
  0.96330000   2.72165099
  0.96330000   1.64591914
  0.96330000   2.53940394
  0.96330000   1.98759355
  0.96340000   1.65388081
  0.96340000   2.54891273
  0.96340000   1.96906111
  0.96340000   2.72477911
  0.96340000   1.64124314
  0.96340000   2.53569579
  0.96340000   1.99545567
  0.96340000   2.72155331
  0.96340000   1.64638735
  0.96340000   2.54108656
  0.96340000   1.98461357
  0.96340000   2.72324803
  0.96340000   1.64362863
  0.96340000   2.53818591
  0.96340000   1.99040255
  0.96340000   2.72238555
  0.96340000   1.64500201
  0.96340000   2.53962031
  0.96340000   1.98750843
  0.96340000   2.72281583
  0.96340000   1.64429471
  0.96340000   2.53887284
  0.96340000   1.98899132
  0.96350000   1.64120008
  0.96350000   2.53684342
  0.96350000   1.99354282
  0.96350000   2.72296993
  0.96350000   1.64438517
  0.96350000   2.54017252
  0.96350000   1.98680889
  0.96350000   2.72401460
  0.96350000   1.64267166
  0.96350000   2.53835880
  0.96350000   1.99041344
  0.96350000   2.72344351
  0.96350000   1.64356957
  0.96350000   2.53929480
  0.96350000   1.98851287
  0.96350000   2.72372500
  0.96350000   1.64310016
  0.96350000   2.53879421
  0.96350000   1.98949798
  0.96350000   2.72355991
  0.96350000   1.64335294
  0.96350000   2.53905456
  0.96350000   1.98896082
  0.96360000   1.63792565
  0.96360000   2.53453726
  0.96360000   1.99849400
  0.96360000   2.72306681
  0.96360000   1.64448795
  0.96360000   2.54145161
  0.96360000   1.98457585
  0.96360000   2.72537243
  0.96360000   1.64074937
  0.96360000   2.53750139
  0.96360000   1.99246754
  0.96360000   2.72414334
  0.96360000   1.64270188
  0.96360000   2.53955319
  0.96360000   1.98832818
  0.96360000   2.72479888
  0.96360000   1.64163205
  0.96360000   2.53841834
  0.96360000   1.99058595
  0.96360000   2.72442997
  0.96360000   1.64221183
  0.96360000   2.53902441
  0.96360000   1.98935518
  0.96370000   1.63918113
  0.96370000   2.53703913
  0.96370000   1.99380308
  0.96370000   2.72499841
  0.96370000   1.64163527
  0.96370000   2.53962007
  0.96370000   1.98858093
  0.96370000   2.72584272
  0.96370000   1.64025314
  0.96370000   2.53814764
  0.96370000   1.99150515
  0.96370000   2.72534964
  0.96370000   1.64102341
  0.96370000   2.53895383
  0.96370000   1.98986421
  0.96370000   2.72560388
  0.96370000   1.64059975
  0.96370000   2.53849909
  0.96370000   1.99075830
  0.96370000   2.72544540
  0.96370000   1.64084114
  0.96370000   2.53874888
  0.96370000   1.99024207
  0.96380000   1.64104268
  0.96380000   2.54018164
  0.96380000   1.98782866
  0.96380000   2.72703184
  0.96380000   1.63863747
  0.96380000   2.53761723
  0.96380000   1.99293455
  0.96380000   2.72616561
  0.96380000   1.63999649
  0.96380000   2.53904758
  0.96380000   1.99003314
  0.96380000   2.72663717
  0.96380000   1.63922135
  0.96380000   2.53821737
  0.96380000   1.99167663
  0.96380000   2.72634742
  0.96380000   1.63966935
  0.96380000   2.53868569
  0.96380000   1.99071819
  0.96380000   2.72649589
  0.96380000   1.63941898
  0.96380000   2.53841478
  0.96380000   1.99124707
  0.96390000   1.64146969
  0.96390000   2.54180508
  0.96390000   1.98490276
  0.96390000   2.72850436
  0.96390000   1.63655028
  0.96390000   2.53656742
  0.96390000   1.99537820
  0.96390000   2.72675813
  0.96390000   1.63931058
  0.96390000   2.53949254
  0.96390000   1.98947384
  0.96390000   2.72777261
  0.96390000   1.63766900
  0.96390000   2.53773977
  0.96390000   1.99297051
  0.96390000   2.72716424
  0.96390000   1.63862494
  0.96390000   2.53874947
  0.96390000   1.99092458
  0.96390000   2.72750537
  0.96390000   1.63806720
  0.96390000   2.53815123
  0.96390000   1.99211098
  0.96400000   1.64013945
  0.96400000   2.54157014
  0.96400000   1.98570589
  0.96400000   2.72944060
  0.96400000   1.63532232
  0.96400000   2.53642773
  0.96400000   1.99599460
  0.96400000   2.72767874
  0.96400000   1.63810243
  0.96400000   2.53938149
  0.96400000   1.99003070
  0.96400000   2.72872716
  0.96400000   1.63641011
  0.96400000   2.53757025
  0.96400000   1.99364624
  0.96400000   2.72808396
  0.96400000   1.63741971
  0.96400000   2.53863977
  0.96400000   1.99147942
  0.96400000   2.72845483
  0.96400000   1.63681570
  0.96400000   2.53799074
  0.96400000   1.99276834
  0.96410000   1.63766695
  0.96410000   2.54011656
  0.96410000   1.98895724
  0.96410000   2.72999451
  0.96410000   1.63470457
  0.96410000   2.53693859
  0.96410000   1.99530348
  0.96410000   2.72885100
  0.96410000   1.63649705
  0.96410000   2.53884367
  0.96410000   1.99144530
  0.96410000   2.72953298
  0.96410000   1.63539187
  0.96410000   2.53765476
  0.96410000   1.99381173
  0.96410000   2.72909484
  0.96410000   1.63607337
  0.96410000   2.53837636
  0.96410000   1.99234339
  0.96410000   2.72934729
  0.96410000   1.63565911
  0.96410000   2.53792839
  0.96410000   1.99322878
  0.96420000   1.63483589
  0.96420000   2.53826623
  0.96420000   1.99300943
  0.96420000   2.73034661
  0.96420000   1.63441006
  0.96420000   2.53779538
  0.96420000   1.99391645
  0.96420000   2.73015304
  0.96420000   1.63469161
  0.96420000   2.53808615
  0.96420000   1.99330254
  0.96420000   2.73024578
  0.96420000   1.63452477
  0.96420000   2.53789911
  0.96420000   1.99365585
  0.96420000   2.73016497
  0.96420000   1.63463766
  0.96420000   2.53801342
  0.96420000   1.99340794
  0.96420000   2.73019777
  0.96420000   1.63457311
  0.96420000   2.53793888
  0.96420000   1.99354296
  0.96430000   1.63218510
  0.96430000   2.53659307
  0.96430000   1.99670954
  0.96430000   2.73068054
  0.96430000   1.63414708
  0.96430000   2.53868614
  0.96430000   1.99246041
  0.96430000   2.73146115
  0.96430000   1.63288413
  0.96430000   2.53731951
  0.96430000   1.99517956
  0.96430000   2.73093405
  0.96430000   1.63369965
  0.96430000   2.53818706
  0.96430000   1.99341211
  0.96430000   2.73125170
  0.96430000   1.63318091
  0.96430000   2.53762349
  0.96430000   1.99452740
  0.96430000   2.73103017
  0.96430000   1.63351948
  0.96430000   2.53798169
  0.96430000   1.99379224
  0.96440000   1.62994543
  0.96440000   2.53534972
  0.96440000   1.99954816
  0.96440000   2.73112674
  0.96440000   1.63370814
  0.96440000   2.53938827
  0.96440000   1.99138299
  0.96440000   2.73269601
  0.96440000   1.63119985
  0.96440000   2.53667881
  0.96440000   1.99680458
  0.96440000   2.73165222
  0.96440000   1.63283012
  0.96440000   2.53842595
  0.96440000   1.99326679
  0.96440000   2.73232066
  0.96440000   1.63175764
  0.96440000   2.53726517
  0.96440000   1.99558399
  0.96440000   2.73186652
  0.96440000   1.63246321
  0.96440000   2.53801937
  0.96440000   1.99405185
  0.96450000   1.62815176
  0.96450000   2.53457977
  0.96450000   2.00143577
  0.96450000   2.73174433
  0.96450000   1.63299962
  0.96450000   2.53980050
  0.96450000   1.99088808
  0.96450000   2.73382706
  0.96450000   1.62968570
  0.96450000   2.53621615
  0.96450000   1.99807229
  0.96450000   2.73242920
  0.96450000   1.63187064
  0.96450000   2.53856646
  0.96450000   1.99331919
  0.96450000   2.73335330
  0.96450000   1.63039693
  0.96450000   2.53697013
  0.96450000   1.99651383
  0.96450000   2.73272089
  0.96450000   1.63138213
  0.96450000   2.53802802
  0.96450000   1.99436992
  0.96460000   1.62676858
  0.96460000   2.53424966
  0.96460000   2.00243853
  0.96460000   2.73254767
  0.96460000   1.63199967
  0.96460000   2.53989795
  0.96460000   1.99102615
  0.96460000   2.73484785
  0.96460000   1.62835040
  0.96460000   2.53594263
  0.96460000   1.99895987
  0.96460000   2.73327772
  0.96460000   1.63080155
  0.96460000   2.53858679
  0.96460000   1.99361339
  0.96460000   2.73434052
  0.96460000   1.62911265
  0.96460000   2.53675397
  0.96460000   1.99728534
  0.96460000   2.73360195
  0.96460000   1.63026276
  0.96460000   2.53799289
  0.96460000   1.99477619
  0.96470000   1.62575603
  0.96470000   2.53431960
  0.96470000   2.00263551
  0.96470000   2.73353436
  0.96470000   1.63071373
  0.96470000   2.53968451
  0.96470000   1.99178996
  0.96470000   2.73575641
  0.96470000   1.62719574
  0.96470000   2.53586179
  0.96470000   1.99945973
  0.96470000   2.73420569
  0.96470000   1.62961112
  0.96470000   2.53847346
  0.96470000   1.99417679
  0.96470000   2.73527523
  0.96470000   1.62791544
  0.96470000   2.53662891
  0.96470000   1.99787378
  0.96470000   2.73451722
  0.96470000   1.62909356
  0.96470000   2.53790117
  0.96470000   1.99529654
  0.96480000   1.62507836
  0.96480000   2.53475310
  0.96480000   2.00209950
  0.96480000   2.73469251
  0.96480000   1.62916270
  0.96480000   2.53918047
  0.96480000   1.99313943
  0.96480000   2.73655124
  0.96480000   1.62622303
  0.96480000   2.53597638
  0.96480000   1.99956590
  0.96480000   2.73521856
  0.96480000   1.62829166
  0.96480000   2.53821716
  0.96480000   1.99502841
  0.96480000   2.73615057
  0.96480000   1.62681554
  0.96480000   2.53660673
  0.96480000   1.99825512
  0.96480000   2.73547403
  0.96480000   1.62786341
  0.96480000   2.53774044
  0.96480000   1.99595615
  0.96490000   1.62468770
  0.96490000   2.53549946
  0.96490000   2.00093220
  0.96490000   2.73599548
  0.96490000   1.62739088
  0.96490000   2.53843133
  0.96490000   1.99498368
  0.96490000   2.73723678
  0.96490000   1.62542440
  0.96490000   2.53627903
  0.96490000   1.99929285
  0.96490000   2.73631505
  0.96490000   1.62684624
  0.96490000   2.53782017
  0.96490000   1.99616404
  0.96490000   2.73696281
  0.96490000   1.62581821
  0.96490000   2.53669391
  0.96490000   1.99841615
  0.96490000   2.73647707
  0.96490000   1.62656549
  0.96490000   2.53750277
  0.96490000   1.99677115
  0.96500000   1.62451227
  0.96500000   2.53648112
  0.96500000   1.99928970
  0.96500000   2.73739991
  0.96500000   1.62546849
  0.96500000   2.53751129
  0.96500000   1.99717388
  0.96500000   2.73782920
  0.96500000   1.62477395
  0.96500000   2.53674240
  0.96500000   1.99869543
  0.96500000   2.73748290
  0.96500000   1.62529521
  0.96500000   2.53730350
  0.96500000   1.99754166
  0.96500000   2.73771516
  0.96500000   1.62491793
  0.96500000   2.53688508
  0.96500000   1.99836746
  0.96500000   2.73752529
  0.96500000   1.62520202
  0.96500000   2.53719001
  0.96500000   1.99773795
  0.96510000   1.62446058
  0.96510000   2.53759841
  0.96510000   1.99737283
  0.96510000   2.73885310
  0.96510000   1.62347946
  0.96510000   2.53651049
  0.96510000   1.99952879
  0.96510000   2.73835653
  0.96510000   1.62422749
  0.96510000   2.53731881
  0.96510000   1.99786954
  0.96510000   2.73869966
  0.96510000   1.62367458
  0.96510000   2.53670558
  0.96510000   1.99908412
  0.96510000   2.73841889
  0.96510000   1.62409665
  0.96510000   2.53716109
  0.96510000   1.99814745
  0.96510000   2.73861090
  0.96510000   1.62378576
  0.96510000   2.53681557
  0.96510000   1.99882976
  0.96520000   1.62443723
  0.96520000   2.53874714
  0.96520000   1.99539171
  0.96520000   2.74030539
  0.96520000   1.62150174
  0.96520000   2.53551383
  0.96520000   2.00187729
  0.96520000   2.73885277
  0.96520000   1.62373174
  0.96520000   2.53795035
  0.96520000   1.99693190
  0.96520000   2.73993863
  0.96520000   1.62202661
  0.96520000   2.53607212
  0.96520000   2.00069940
  0.96520000   2.73909082
  0.96520000   1.62332786
  0.96520000   2.53749333
  0.96520000   1.99781376
  0.96520000   2.73972147
  0.96520000   1.62233654
  0.96520000   2.53640076
  0.96520000   2.00000370
  0.96530000   1.62436011
  0.96530000   2.53983746
  0.96530000   1.99352755
  0.96530000   2.74171974
  0.96530000   1.61959251
  0.96530000   2.53458459
  0.96530000   2.00409158
  0.96530000   2.73934980
  0.96530000   1.62323693
  0.96530000   2.53858262
  0.96530000   1.99599218
  0.96530000   2.74117582
  0.96530000   1.62038876
  0.96530000   2.53544411
  0.96530000   2.00230484
  0.96530000   2.73974871
  0.96530000   1.62258377
  0.96530000   2.53785157
  0.96530000   1.99742729
  0.96530000   2.74084371
  0.96530000   1.62087533
  0.96530000   2.53596835
  0.96530000   2.00121394
  0.96540000   1.62417061
  0.96540000   2.54080513
  0.96540000   1.99191001
  0.96540000   2.74307463
  0.96540000   1.61778419
  0.96540000   2.53375948
  0.96540000   2.00609721
  0.96540000   2.73987174
  0.96540000   1.62270557
  0.96540000   2.53917448
  0.96540000   1.99513343
  0.96540000   2.74239424
  0.96540000   1.61878722
  0.96540000   2.53485063
  0.96540000   2.00384167
  0.96540000   2.74040736
  0.96540000   1.62184130
  0.96540000   2.53821058
  0.96540000   1.99703891
  0.96540000   2.74196661
  0.96540000   1.61941933
  0.96540000   2.53553722
  0.96540000   2.00242234
  0.96550000   1.62383441
  0.96550000   2.54161234
  0.96550000   1.99061545
  0.96550000   2.74436122
  0.96550000   1.61608922
  0.96550000   2.53305349
  0.96550000   2.00786360
  0.96550000   2.74043374
  0.96550000   1.62211426
  0.96550000   2.53970006
  0.96550000   1.99440790
  0.96550000   2.74358412
  0.96550000   1.61723675
  0.96550000   2.53430840
[truncated: 201,319 more chars]
