# Supplementary material for: Bifurcations of a New Fractional-Order System with a One-Scroll Chaotic Attractor
Source: Hindawi journal article supplement (doi:10.1155/2019/8341514), 2019-01-01
Supplement: f1 [file 8341514.f1.zip › 8341514.f1/q1-bifurcationdata/q1dataq096.dat]

  0.90000000   2.18576550
  0.90000000   2.18575935
  0.90000000   2.18575372
  0.90000000   2.18574853
  0.90000000   2.18574374
  0.90000000   2.18573930
  0.90000000   2.18573517
  0.90000000   2.18573132
  0.90000000   2.18572773
  0.90000000   2.18572436
  0.90000000   2.18572120
  0.90000000   2.18571822
  0.90000000   2.18571542
  0.90000000   2.18571277
  0.90000000   2.18571027
  0.90000000   2.18570790
  0.90000000   2.18570565
  0.90000000   2.18570351
  0.90000000   2.18570148
  0.90000000   2.18569954
  0.90000000   2.18569769
  0.90000000   2.18569593
  0.90000000   2.18569424
  0.90010000   2.18632441
  0.90010000   2.18631826
  0.90010000   2.18631263
  0.90010000   2.18630744
  0.90010000   2.18630264
  0.90010000   2.18629820
  0.90010000   2.18629407
  0.90010000   2.18629022
  0.90010000   2.18628662
  0.90010000   2.18628326
  0.90010000   2.18628009
  0.90010000   2.18627712
  0.90010000   2.18627431
  0.90010000   2.18627166
  0.90010000   2.18626916
  0.90010000   2.18626679
  0.90010000   2.18626454
  0.90010000   2.18626240
  0.90010000   2.18626036
  0.90010000   2.18625842
  0.90010000   2.18625658
  0.90010000   2.18625481
  0.90010000   2.18625312
  0.90020000   2.18688154
  0.90020000   2.18687539
  0.90020000   2.18686975
  0.90020000   2.18686456
  0.90020000   2.18685976
  0.90020000   2.18685532
  0.90020000   2.18685119
  0.90020000   2.18684734
  0.90020000   2.18684374
  0.90020000   2.18684037
  0.90020000   2.18683720
  0.90020000   2.18683423
  0.90020000   2.18683142
  0.90020000   2.18682877
  0.90020000   2.18682627
  0.90020000   2.18682389
  0.90020000   2.18682164
  0.90020000   2.18681950
  0.90020000   2.18681746
  0.90020000   2.18681553
  0.90020000   2.18681368
  0.90020000   2.18681191
  0.90020000   2.18681022
  0.90030000   2.18743689
  0.90030000   2.18743074
  0.90030000   2.18742510
  0.90030000   2.18741990
  0.90030000   2.18741511
  0.90030000   2.18741066
  0.90030000   2.18740653
  0.90030000   2.18740268
  0.90030000   2.18739908
  0.90030000   2.18739570
  0.90030000   2.18739254
  0.90030000   2.18738956
  0.90030000   2.18738675
  0.90030000   2.18738410
  0.90030000   2.18738160
  0.90030000   2.18737922
  0.90030000   2.18737697
  0.90030000   2.18737483
  0.90030000   2.18737279
  0.90030000   2.18737085
  0.90030000   2.18736900
  0.90030000   2.18736723
  0.90030000   2.18736554
  0.90040000   2.18799047
  0.90040000   2.18798432
  0.90040000   2.18797868
  0.90040000   2.18797348
  0.90040000   2.18796868
  0.90040000   2.18796424
  0.90040000   2.18796010
  0.90040000   2.18795625
  0.90040000   2.18795265
  0.90040000   2.18794927
  0.90040000   2.18794611
  0.90040000   2.18794313
  0.90040000   2.18794032
  0.90040000   2.18793767
  0.90040000   2.18793516
  0.90040000   2.18793278
  0.90040000   2.18793053
  0.90040000   2.18792839
  0.90040000   2.18792635
  0.90040000   2.18792441
  0.90040000   2.18792255
  0.90040000   2.18792079
  0.90040000   2.18791910
  0.90050000   2.18854229
  0.90050000   2.18853614
  0.90050000   2.18853050
  0.90050000   2.18852530
  0.90050000   2.18852050
  0.90050000   2.18851605
  0.90050000   2.18851192
  0.90050000   2.18850806
  0.90050000   2.18850446
  0.90050000   2.18850108
  0.90050000   2.18849792
  0.90050000   2.18849493
  0.90050000   2.18849213
  0.90050000   2.18848947
  0.90050000   2.18848696
  0.90050000   2.18848458
  0.90050000   2.18848233
  0.90050000   2.18848019
  0.90050000   2.18847815
  0.90050000   2.18847620
  0.90050000   2.18847435
  0.90050000   2.18847258
  0.90050000   2.18847089
  0.90060000   2.18909237
  0.90060000   2.18908622
  0.90060000   2.18908057
  0.90060000   2.18907537
  0.90060000   2.18907057
  0.90060000   2.18906612
  0.90060000   2.18906199
  0.90060000   2.18905813
  0.90060000   2.18905452
  0.90060000   2.18905115
  0.90060000   2.18904798
  0.90060000   2.18904499
  0.90060000   2.18904218
  0.90060000   2.18903953
  0.90060000   2.18903702
  0.90060000   2.18903464
  0.90060000   2.18903238
  0.90060000   2.18903024
  0.90060000   2.18902820
  0.90060000   2.18902626
  0.90060000   2.18902440
  0.90060000   2.18902263
  0.90060000   2.18902094
  0.90070000   2.18964071
  0.90070000   2.18963455
  0.90070000   2.18962890
  0.90070000   2.18962371
  0.90070000   2.18961890
  0.90070000   2.18961445
  0.90070000   2.18961031
  0.90070000   2.18960645
  0.90070000   2.18960285
  0.90070000   2.18959947
  0.90070000   2.18959630
  0.90070000   2.18959332
  0.90070000   2.18959050
  0.90070000   2.18958785
  0.90070000   2.18958534
  0.90070000   2.18958296
  0.90070000   2.18958070
  0.90070000   2.18957855
  0.90070000   2.18957651
  0.90070000   2.18957457
  0.90070000   2.18957271
  0.90070000   2.18957094
  0.90070000   2.18956925
  0.90080000   2.19018731
  0.90080000   2.19018115
  0.90080000   2.19017551
  0.90080000   2.19017031
  0.90080000   2.19016550
  0.90080000   2.19016105
  0.90080000   2.19015691
  0.90080000   2.19015305
  0.90080000   2.19014944
  0.90080000   2.19014606
  0.90080000   2.19014289
  0.90080000   2.19013990
  0.90080000   2.19013709
  0.90080000   2.19013443
  0.90080000   2.19013192
  0.90080000   2.19012954
  0.90080000   2.19012728
  0.90080000   2.19012514
  0.90080000   2.19012309
  0.90080000   2.19012115
  0.90080000   2.19011929
  0.90080000   2.19011752
  0.90080000   2.19011583
  0.90090000   2.19073220
  0.90090000   2.19072604
  0.90090000   2.19072039
  0.90090000   2.19071519
  0.90090000   2.19071038
  0.90090000   2.19070593
  0.90090000   2.19070178
  0.90090000   2.19069792
  0.90090000   2.19069431
  0.90090000   2.19069093
  0.90090000   2.19068776
  0.90090000   2.19068477
  0.90090000   2.19068196
  0.90090000   2.19067930
  0.90090000   2.19067679
  0.90090000   2.19067440
  0.90090000   2.19067215
  0.90090000   2.19067000
  0.90090000   2.19066795
  0.90090000   2.19066601
  0.90090000   2.19066415
  0.90090000   2.19066238
  0.90090000   2.19066068
  0.90100000   2.19127537
  0.90100000   2.19126921
  0.90100000   2.19126356
  0.90100000   2.19125836
  0.90100000   2.19125355
  0.90100000   2.19124909
  0.90100000   2.19124495
  0.90100000   2.19124109
  0.90100000   2.19123748
  0.90100000   2.19123409
  0.90100000   2.19123092
  0.90100000   2.19122793
  0.90100000   2.19122511
  0.90100000   2.19122245
  0.90100000   2.19121994
  0.90100000   2.19121756
  0.90100000   2.19121530
  0.90100000   2.19121315
  0.90100000   2.19121110
  0.90100000   2.19120916
  0.90100000   2.19120730
  0.90100000   2.19120552
  0.90100000   2.19120383
  0.90110000   2.19181684
  0.90110000   2.19181068
  0.90110000   2.19180502
  0.90110000   2.19179982
  0.90110000   2.19179501
  0.90110000   2.19179055
  0.90110000   2.19178641
  0.90110000   2.19178254
  0.90110000   2.19177893
  0.90110000   2.19177555
  0.90110000   2.19177237
  0.90110000   2.19176938
  0.90110000   2.19176657
  0.90110000   2.19176391
  0.90110000   2.19176139
  0.90110000   2.19175901
  0.90110000   2.19175674
  0.90110000   2.19175459
  0.90110000   2.19175255
  0.90110000   2.19175060
  0.90110000   2.19174874
  0.90110000   2.19174697
  0.90110000   2.19174527
  0.90120000   2.19235661
  0.90120000   2.19235045
  0.90120000   2.19234480
  0.90120000   2.19233959
  0.90120000   2.19233478
  0.90120000   2.19233032
  0.90120000   2.19232617
  0.90120000   2.19232231
  0.90120000   2.19231870
  0.90120000   2.19231531
  0.90120000   2.19231213
  0.90120000   2.19230914
  0.90120000   2.19230632
  0.90120000   2.19230366
  0.90120000   2.19230114
  0.90120000   2.19229876
  0.90120000   2.19229650
  0.90120000   2.19229435
  0.90120000   2.19229230
  0.90120000   2.19229035
  0.90120000   2.19228849
  0.90120000   2.19228671
  0.90120000   2.19228502
  0.90130000   2.19289470
  0.90130000   2.19288854
  0.90130000   2.19288288
  0.90130000   2.19287767
  0.90130000   2.19287286
  0.90130000   2.19286840
  0.90130000   2.19286425
  0.90130000   2.19286039
  0.90130000   2.19285677
  0.90130000   2.19285339
  0.90130000   2.19285021
  0.90130000   2.19284722
  0.90130000   2.19284440
  0.90130000   2.19284173
  0.90130000   2.19283921
  0.90130000   2.19283683
  0.90130000   2.19283456
  0.90130000   2.19283241
  0.90130000   2.19283036
  0.90130000   2.19282841
  0.90130000   2.19282655
  0.90130000   2.19282478
  0.90130000   2.19282308
  0.90140000   2.19343111
  0.90140000   2.19342495
  0.90140000   2.19341929
  0.90140000   2.19341408
  0.90140000   2.19340927
  0.90140000   2.19340481
  0.90140000   2.19340066
  0.90140000   2.19339679
  0.90140000   2.19339317
  0.90140000   2.19338978
  0.90140000   2.19338660
  0.90140000   2.19338361
  0.90140000   2.19338079
  0.90140000   2.19337813
  0.90140000   2.19337561
  0.90140000   2.19337322
  0.90140000   2.19337095
  0.90140000   2.19336880
  0.90140000   2.19336675
  0.90140000   2.19336480
  0.90140000   2.19336294
  0.90140000   2.19336116
  0.90140000   2.19335946
  0.90150000   2.19396585
  0.90150000   2.19395969
  0.90150000   2.19395403
  0.90150000   2.19394882
  0.90150000   2.19394401
  0.90150000   2.19393954
  0.90150000   2.19393539
  0.90150000   2.19393152
  0.90150000   2.19392790
  0.90150000   2.19392452
  0.90150000   2.19392133
  0.90150000   2.19391834
  0.90150000   2.19391552
  0.90150000   2.19391285
  0.90150000   2.19391033
  0.90150000   2.19390794
  0.90150000   2.19390568
  0.90150000   2.19390352
  0.90150000   2.19390147
  0.90150000   2.19389952
  0.90150000   2.19389766
  0.90150000   2.19389588
  0.90150000   2.19389418
  0.90160000   2.19449894
  0.90160000   2.19449277
  0.90160000   2.19448711
  0.90160000   2.19448190
  0.90160000   2.19447708
  0.90160000   2.19447262
  0.90160000   2.19446847
  0.90160000   2.19446459
  0.90160000   2.19446098
  0.90160000   2.19445759
  0.90160000   2.19445440
  0.90160000   2.19445141
  0.90160000   2.19444858
  0.90160000   2.19444592
  0.90160000   2.19444340
  0.90160000   2.19444101
  0.90160000   2.19443874
  0.90160000   2.19443658
  0.90160000   2.19443453
  0.90160000   2.19443258
  0.90160000   2.19443072
  0.90160000   2.19442894
  0.90160000   2.19442724
  0.90170000   2.19503037
  0.90170000   2.19502420
  0.90170000   2.19501854
  0.90170000   2.19501333
  0.90170000   2.19500851
  0.90170000   2.19500404
  0.90170000   2.19499989
  0.90170000   2.19499602
  0.90170000   2.19499240
  0.90170000   2.19498900
  0.90170000   2.19498582
  0.90170000   2.19498282
  0.90170000   2.19498000
  0.90170000   2.19497733
  0.90170000   2.19497481
  0.90170000   2.19497242
  0.90170000   2.19497015
  0.90170000   2.19496799
  0.90170000   2.19496594
  0.90170000   2.19496399
  0.90170000   2.19496213
  0.90170000   2.19496035
  0.90170000   2.19495864
  0.90180000   2.19556016
  0.90180000   2.19555399
  0.90180000   2.19554833
  0.90180000   2.19554311
  0.90180000   2.19553829
  0.90180000   2.19553382
  0.90180000   2.19552967
  0.90180000   2.19552580
  0.90180000   2.19552217
  0.90180000   2.19551878
  0.90180000   2.19551560
  0.90180000   2.19551260
  0.90180000   2.19550977
  0.90180000   2.19550710
  0.90180000   2.19550458
  0.90180000   2.19550219
  0.90180000   2.19549992
  0.90180000   2.19549776
  0.90180000   2.19549571
  0.90180000   2.19549376
  0.90180000   2.19549189
  0.90180000   2.19549011
  0.90180000   2.19548841
  0.90190000   2.19608831
  0.90190000   2.19608214
  0.90190000   2.19607648
  0.90190000   2.19607126
  0.90190000   2.19606644
  0.90190000   2.19606197
  0.90190000   2.19605782
  0.90190000   2.19605394
  0.90190000   2.19605032
  0.90190000   2.19604692
  0.90190000   2.19604374
  0.90190000   2.19604074
  0.90190000   2.19603791
  0.90190000   2.19603524
  0.90190000   2.19603272
  0.90190000   2.19603032
  0.90190000   2.19602805
  0.90190000   2.19602590
  0.90190000   2.19602384
  0.90190000   2.19602189
  0.90190000   2.19602002
  0.90190000   2.19601824
  0.90190000   2.19601654
  0.90200000   2.19661484
  0.90200000   2.19660867
  0.90200000   2.19660300
  0.90200000   2.19659779
  0.90200000   2.19659296
  0.90200000   2.19658849
  0.90200000   2.19658434
  0.90200000   2.19658046
  0.90200000   2.19657684
  0.90200000   2.19657344
  0.90200000   2.19657025
  0.90200000   2.19656725
  0.90200000   2.19656442
  0.90200000   2.19656175
  0.90200000   2.19655923
  0.90200000   2.19655683
  0.90200000   2.19655456
  0.90200000   2.19655240
  0.90200000   2.19655035
  0.90200000   2.19654839
  0.90200000   2.19654653
  0.90200000   2.19654474
  0.90200000   2.19654304
  0.90210000   2.19713975
  0.90210000   2.19713357
  0.90210000   2.19712791
  0.90210000   2.19712269
  0.90210000   2.19711787
  0.90210000   2.19711340
  0.90210000   2.19710924
  0.90210000   2.19710536
  0.90210000   2.19710174
  0.90210000   2.19709834
  0.90210000   2.19709515
  0.90210000   2.19709215
  0.90210000   2.19708932
  0.90210000   2.19708665
  0.90210000   2.19708412
  0.90210000   2.19708173
  0.90210000   2.19707945
  0.90210000   2.19707729
  0.90210000   2.19707524
  0.90210000   2.19707328
  0.90210000   2.19707141
  0.90210000   2.19706963
  0.90210000   2.19706793
  0.90220000   2.19766306
  0.90220000   2.19765687
  0.90220000   2.19765121
  0.90220000   2.19764599
  0.90220000   2.19764117
  0.90220000   2.19763669
  0.90220000   2.19763253
  0.90220000   2.19762865
  0.90220000   2.19762503
  0.90220000   2.19762163
  0.90220000   2.19761844
  0.90220000   2.19761544
  0.90220000   2.19761261
  0.90220000   2.19760993
  0.90220000   2.19760740
  0.90220000   2.19760501
  0.90220000   2.19760274
  0.90220000   2.19760057
  0.90220000   2.19759852
  0.90220000   2.19759656
  0.90220000   2.19759469
  0.90220000   2.19759291
  0.90220000   2.19759120
  0.90230000   2.19818476
  0.90230000   2.19817857
  0.90230000   2.19817291
  0.90230000   2.19816769
  0.90230000   2.19816286
  0.90230000   2.19815839
  0.90230000   2.19815422
  0.90230000   2.19815034
  0.90230000   2.19814672
  0.90230000   2.19814332
  0.90230000   2.19814012
  0.90230000   2.19813712
  0.90230000   2.19813429
  0.90230000   2.19813162
  0.90230000   2.19812909
  0.90230000   2.19812669
  0.90230000   2.19812442
  0.90230000   2.19812225
  0.90230000   2.19812020
  0.90230000   2.19811824
  0.90230000   2.19811637
  0.90230000   2.19811458
  0.90230000   2.19811288
  0.90240000   2.19870486
  0.90240000   2.19869868
  0.90240000   2.19869301
  0.90240000   2.19868779
  0.90240000   2.19868296
  0.90240000   2.19867848
  0.90240000   2.19867432
  0.90240000   2.19867044
  0.90240000   2.19866681
  0.90240000   2.19866341
  0.90240000   2.19866022
  0.90240000   2.19865721
  0.90240000   2.19865438
  0.90240000   2.19865171
  0.90240000   2.19864918
  0.90240000   2.19864678
  0.90240000   2.19864450
  0.90240000   2.19864234
  0.90240000   2.19864028
  0.90240000   2.19863832
  0.90240000   2.19863645
  0.90240000   2.19863467
  0.90240000   2.19863296
  0.90250000   2.19922339
  0.90250000   2.19921720
  0.90250000   2.19921153
  0.90250000   2.19920631
  0.90250000   2.19920148
  0.90250000   2.19919700
  0.90250000   2.19919284
  0.90250000   2.19918895
  0.90250000   2.19918532
  0.90250000   2.19918192
  0.90250000   2.19917873
  0.90250000   2.19917572
  0.90250000   2.19917289
  0.90250000   2.19917021
  0.90250000   2.19916768
  0.90250000   2.19916528
  0.90250000   2.19916301
  0.90250000   2.19916084
  0.90250000   2.19915878
  0.90250000   2.19915682
  0.90250000   2.19915495
  0.90250000   2.19915316
  0.90250000   2.19915146
  0.90260000   2.19974033
  0.90260000   2.19973414
  0.90260000   2.19972847
  0.90260000   2.19972324
  0.90260000   2.19971842
  0.90260000   2.19971394
  0.90260000   2.19970977
  0.90260000   2.19970589
  0.90260000   2.19970226
  0.90260000   2.19969886
  0.90260000   2.19969566
  0.90260000   2.19969265
  0.90260000   2.19968982
  0.90260000   2.19968714
  0.90260000   2.19968461
  0.90260000   2.19968221
  0.90260000   2.19967993
  0.90260000   2.19967777
  0.90260000   2.19967571
  0.90260000   2.19967375
  0.90260000   2.19967187
  0.90260000   2.19967009
  0.90260000   2.19966838
  0.90270000   2.20025571
  0.90270000   2.20024951
  0.90270000   2.20024385
  0.90270000   2.20023862
  0.90270000   2.20023379
  0.90270000   2.20022931
  0.90270000   2.20022514
  0.90270000   2.20022125
  0.90270000   2.20021762
  0.90270000   2.20021422
  0.90270000   2.20021102
  0.90270000   2.20020801
  0.90270000   2.20020518
  0.90270000   2.20020250
  0.90270000   2.20019997
  0.90270000   2.20019757
  0.90270000   2.20019529
  0.90270000   2.20019312
  0.90270000   2.20019106
  0.90270000   2.20018910
  0.90270000   2.20018723
  0.90270000   2.20018544
  0.90270000   2.20018373
  0.90280000   2.20076952
  0.90280000   2.20076332
  0.90280000   2.20075766
  0.90280000   2.20075243
  0.90280000   2.20074760
  0.90280000   2.20074311
  0.90280000   2.20073895
  0.90280000   2.20073506
  0.90280000   2.20073143
  0.90280000   2.20072802
  0.90280000   2.20072482
  0.90280000   2.20072182
  0.90280000   2.20071898
  0.90280000   2.20071630
  0.90280000   2.20071376
  0.90280000   2.20071136
  0.90280000   2.20070908
  0.90280000   2.20070692
  0.90280000   2.20070486
  0.90280000   2.20070289
  0.90280000   2.20070102
  0.90280000   2.20069923
  0.90280000   2.20069752
  0.90290000   2.20128179
  0.90290000   2.20127558
  0.90290000   2.20126992
  0.90290000   2.20126468
  0.90290000   2.20125985
  0.90290000   2.20125537
  0.90290000   2.20125120
  0.90290000   2.20124731
  0.90290000   2.20124368
  0.90290000   2.20124027
  0.90290000   2.20123707
  0.90290000   2.20123406
  0.90290000   2.20123122
  0.90290000   2.20122854
  0.90290000   2.20122601
  0.90290000   2.20122361
  0.90290000   2.20122133
  0.90290000   2.20121916
  0.90290000   2.20121710
  0.90290000   2.20121513
  0.90290000   2.20121326
  0.90290000   2.20121147
  0.90290000   2.20120976
  0.90300000   2.20179250
  0.90300000   2.20178629
  0.90300000   2.20178063
  0.90300000   2.20177539
  0.90300000   2.20177056
  0.90300000   2.20176608
  0.90300000   2.20176191
  0.90300000   2.20175802
  0.90300000   2.20175438
  0.90300000   2.20175097
  0.90300000   2.20174778
  0.90300000   2.20174476
  0.90300000   2.20174193
  0.90300000   2.20173924
  0.90300000   2.20173671
  0.90300000   2.20173430
  0.90300000   2.20173202
  0.90300000   2.20172985
  0.90300000   2.20172779
  0.90300000   2.20172583
  0.90300000   2.20172395
  0.90300000   2.20172216
  0.90300000   2.20172045
  0.90310000   2.20230169
  0.90310000   2.20229547
  0.90310000   2.20228980
  0.90310000   2.20228457
  0.90310000   2.20227973
  0.90310000   2.20227525
  0.90310000   2.20227108
  0.90310000   2.20226719
  0.90310000   2.20226355
  0.90310000   2.20226014
  0.90310000   2.20225694
  0.90310000   2.20225393
  0.90310000   2.20225109
  0.90310000   2.20224841
  0.90310000   2.20224587
  0.90310000   2.20224346
  0.90310000   2.20224118
  0.90310000   2.20223901
  0.90310000   2.20223695
  0.90310000   2.20223498
  0.90310000   2.20223311
  0.90310000   2.20223132
  0.90310000   2.20222960
  0.90320000   2.20280934
  0.90320000   2.20280311
  0.90320000   2.20279745
  0.90320000   2.20279221
  0.90320000   2.20278738
  0.90320000   2.20278289
  0.90320000   2.20277872
  0.90320000   2.20277482
  0.90320000   2.20277119
  0.90320000   2.20276778
  0.90320000   2.20276458
  0.90320000   2.20276156
  0.90320000   2.20275872
  0.90320000   2.20275604
  0.90320000   2.20275350
  0.90320000   2.20275109
  0.90320000   2.20274881
  0.90320000   2.20274664
  0.90320000   2.20274458
  0.90320000   2.20274261
  0.90320000   2.20274073
  0.90320000   2.20273894
  0.90320000   2.20273723
  0.90330000   2.20331546
  0.90330000   2.20330923
  0.90330000   2.20330357
  0.90330000   2.20329833
  0.90330000   2.20329349
  0.90330000   2.20328901
  0.90330000   2.20328483
  0.90330000   2.20328094
  0.90330000   2.20327730
  0.90330000   2.20327389
  0.90330000   2.20327069
  0.90330000   2.20326767
  0.90330000   2.20326483
  0.90330000   2.20326215
  0.90330000   2.20325961
  0.90330000   2.20325720
  0.90330000   2.20325492
  0.90330000   2.20325275
  0.90330000   2.20325068
  0.90330000   2.20324871
  0.90330000   2.20324684
  0.90330000   2.20324504
  0.90330000   2.20324333
  0.90340000   2.20382008
  0.90340000   2.20381384
  0.90340000   2.20380818
  0.90340000   2.20380293
  0.90340000   2.20379810
  0.90340000   2.20379361
  0.90340000   2.20378943
  0.90340000   2.20378554
  0.90340000   2.20378190
  0.90340000   2.20377849
  0.90340000   2.20377528
  0.90340000   2.20377227
  0.90340000   2.20376943
  0.90340000   2.20376674
  0.90340000   2.20376420
  0.90340000   2.20376179
  0.90340000   2.20375951
  0.90340000   2.20375734
  0.90340000   2.20375527
  0.90340000   2.20375330
  0.90340000   2.20375142
  0.90340000   2.20374963
  0.90340000   2.20374792
  0.90350000   2.20432318
  0.90350000   2.20431693
  0.90350000   2.20431128
  0.90350000   2.20430603
  0.90350000   2.20430120
  0.90350000   2.20429670
  0.90350000   2.20429253
  0.90350000   2.20428863
  0.90350000   2.20428499
  0.90350000   2.20428158
  0.90350000   2.20427838
  0.90350000   2.20427536
  0.90350000   2.20427251
  0.90350000   2.20426983
  0.90350000   2.20426729
  0.90350000   2.20426488
  0.90350000   2.20426259
  0.90350000   2.20426042
  0.90350000   2.20425835
  0.90350000   2.20425638
  0.90350000   2.20425451
  0.90350000   2.20425271
  0.90350000   2.20425100
  0.90360000   2.20482479
  0.90360000   2.20481853
  0.90360000   2.20481288
  0.90360000   2.20480763
  0.90360000   2.20480279
  0.90360000   2.20479830
  0.90360000   2.20479412
  0.90360000   2.20479023
  0.90360000   2.20478659
  0.90360000   2.20478317
  0.90360000   2.20477996
  0.90360000   2.20477695
  0.90360000   2.20477410
  0.90360000   2.20477141
  0.90360000   2.20476887
  0.90360000   2.20476646
  0.90360000   2.20476418
  0.90360000   2.20476200
  0.90360000   2.20475994
  0.90360000   2.20475797
  0.90360000   2.20475609
  0.90360000   2.20475429
  0.90360000   2.20475258
  0.90370000   2.20532491
  0.90370000   2.20531863
  0.90370000   2.20531299
  0.90370000   2.20530773
  0.90370000   2.20530290
  0.90370000   2.20529840
  0.90370000   2.20529423
  0.90370000   2.20529033
  0.90370000   2.20528668
  0.90370000   2.20528327
  0.90370000   2.20528006
  0.90370000   2.20527704
  0.90370000   2.20527420
  0.90370000   2.20527151
  0.90370000   2.20526897
  0.90370000   2.20526656
  0.90370000   2.20526427
  0.90370000   2.20526210
  0.90370000   2.20526003
  0.90370000   2.20525806
  0.90370000   2.20525618
  0.90370000   2.20525438
  0.90370000   2.20525266
  0.90380000   2.20582354
  0.90380000   2.20581725
  0.90380000   2.20581161
  0.90380000   2.20580635
  0.90380000   2.20580152
  0.90380000   2.20579702
  0.90380000   2.20579284
  0.90380000   2.20578894
  0.90380000   2.20578530
  0.90380000   2.20578188
  0.90380000   2.20577867
  0.90380000   2.20577566
  0.90380000   2.20577281
  0.90380000   2.20577012
  0.90380000   2.20576757
  0.90380000   2.20576516
  0.90380000   2.20576288
  0.90380000   2.20576070
  0.90380000   2.20575863
  0.90380000   2.20575666
  0.90380000   2.20575478
  0.90380000   2.20575298
  0.90380000   2.20575126
  0.90390000   2.20632070
  0.90390000   2.20631439
  0.90390000   2.20630876
  0.90390000   2.20630349
  0.90390000   2.20629866
  0.90390000   2.20629416
  0.90390000   2.20628998
  0.90390000   2.20628608
  0.90390000   2.20628244
  0.90390000   2.20627902
  0.90390000   2.20627581
  0.90390000   2.20627279
  0.90390000   2.20626994
  0.90390000   2.20626725
  0.90390000   2.20626471
  0.90390000   2.20626229
  0.90390000   2.20626001
  0.90390000   2.20625783
  0.90390000   2.20625576
  0.90390000   2.20625379
  0.90390000   2.20625191
  0.90390000   2.20625011
  0.90390000   2.20624839
  0.90400000   2.20681638
  0.90400000   2.20681006
  0.90400000   2.20680444
  0.90400000   2.20679916
  0.90400000   2.20679433
  0.90400000   2.20678983
  0.90400000   2.20678565
  0.90400000   2.20678175
  0.90400000   2.20677810
  0.90400000   2.20677468
  0.90400000   2.20677147
  0.90400000   2.20676845
  0.90400000   2.20676560
  0.90400000   2.20676291
  0.90400000   2.20676037
  0.90400000   2.20675795
  0.90400000   2.20675566
  0.90400000   2.20675349
  0.90400000   2.20675142
  0.90400000   2.20674944
  0.90400000   2.20674756
  0.90400000   2.20674576
  0.90400000   2.20674404
  0.90410000   2.20731061
  0.90410000   2.20730426
  0.90410000   2.20729865
  0.90410000   2.20729337
  0.90410000   2.20728854
  0.90410000   2.20728403
  0.90410000   2.20727986
  0.90410000   2.20727595
  0.90410000   2.20727231
  0.90410000   2.20726889
  0.90410000   2.20726567
  0.90410000   2.20726265
  0.90410000   2.20725980
  0.90410000   2.20725711
  0.90410000   2.20725456
  0.90410000   2.20725215
  0.90410000   2.20724986
  0.90410000   2.20724768
  0.90410000   2.20724561
  0.90410000   2.20724364
  0.90410000   2.20724175
  0.90410000   2.20723995
  0.90410000   2.20723824
  0.90420000   2.20780338
  0.90420000   2.20779701
  0.90420000   2.20779141
  0.90420000   2.20778612
  0.90420000   2.20778129
  0.90420000   2.20777678
  0.90420000   2.20777261
  0.90420000   2.20776870
  0.90420000   2.20776505
  0.90420000   2.20776163
  0.90420000   2.20775842
  0.90420000   2.20775540
  0.90420000   2.20775254
  0.90420000   2.20774985
  0.90420000   2.20774730
  0.90420000   2.20774489
  0.90420000   2.20774260
  0.90420000   2.20774042
  0.90420000   2.20773835
  0.90420000   2.20773637
  0.90420000   2.20773449
  0.90420000   2.20773269
  0.90420000   2.20773097
  0.90000000   2.18576550
  0.90000000   2.18575935
  0.90000000   2.18575372
  0.90000000   2.18574853
  0.90000000   2.18574374
  0.90000000   2.18573930
  0.90000000   2.18573517
  0.90000000   2.18573132
  0.90000000   2.18572773
  0.90000000   2.18572436
  0.90000000   2.18572120
  0.90000000   2.18571822
  0.90000000   2.18571542
  0.90000000   2.18571277
  0.90000000   2.18571027
  0.90000000   2.18570790
  0.90000000   2.18570565
  0.90000000   2.18570351
  0.90000000   2.18570148
  0.90000000   2.18569954
  0.90000000   2.18569769
  0.90000000   2.18569593
  0.90000000   2.18569424
  0.90010000   2.18632441
  0.90010000   2.18631826
  0.90010000   2.18631263
  0.90010000   2.18630744
  0.90010000   2.18630264
  0.90010000   2.18629820
  0.90010000   2.18629407
  0.90010000   2.18629022
  0.90010000   2.18628662
  0.90010000   2.18628326
  0.90010000   2.18628009
  0.90010000   2.18627712
  0.90010000   2.18627431
  0.90010000   2.18627166
  0.90010000   2.18626916
  0.90010000   2.18626679
  0.90010000   2.18626454
  0.90010000   2.18626240
  0.90010000   2.18626036
  0.90010000   2.18625842
  0.90010000   2.18625658
  0.90010000   2.18625481
  0.90010000   2.18625312
  0.90020000   2.18688154
  0.90020000   2.18687539
  0.90020000   2.18686975
  0.90020000   2.18686456
  0.90020000   2.18685976
  0.90020000   2.18685532
  0.90020000   2.18685119
  0.90020000   2.18684734
  0.90020000   2.18684374
  0.90020000   2.18684037
  0.90020000   2.18683720
  0.90020000   2.18683423
  0.90020000   2.18683142
  0.90020000   2.18682877
  0.90020000   2.18682627
  0.90020000   2.18682389
  0.90020000   2.18682164
  0.90020000   2.18681950
  0.90020000   2.18681746
  0.90020000   2.18681553
  0.90020000   2.18681368
  0.90020000   2.18681191
  0.90020000   2.18681022
  0.90030000   2.18743689
  0.90030000   2.18743074
  0.90030000   2.18742510
  0.90030000   2.18741990
  0.90030000   2.18741511
  0.90030000   2.18741066
  0.90030000   2.18740653
  0.90030000   2.18740268
  0.90030000   2.18739908
  0.90030000   2.18739570
  0.90030000   2.18739254
  0.90030000   2.18738956
  0.90030000   2.18738675
  0.90030000   2.18738410
  0.90030000   2.18738160
  0.90030000   2.18737922
  0.90030000   2.18737697
  0.90030000   2.18737483
  0.90030000   2.18737279
  0.90030000   2.18737085
  0.90030000   2.18736900
  0.90030000   2.18736723
  0.90030000   2.18736554
  0.90040000   2.18799047
  0.90040000   2.18798432
  0.90040000   2.18797868
  0.90040000   2.18797348
  0.90040000   2.18796868
  0.90040000   2.18796424
  0.90040000   2.18796010
  0.90040000   2.18795625
  0.90040000   2.18795265
  0.90040000   2.18794927
  0.90040000   2.18794611
  0.90040000   2.18794313
  0.90040000   2.18794032
  0.90040000   2.18793767
  0.90040000   2.18793516
  0.90040000   2.18793278
  0.90040000   2.18793053
  0.90040000   2.18792839
  0.90040000   2.18792635
  0.90040000   2.18792441
  0.90040000   2.18792255
  0.90040000   2.18792079
  0.90040000   2.18791910
  0.90050000   2.18854229
  0.90050000   2.18853614
  0.90050000   2.18853050
  0.90050000   2.18852530
  0.90050000   2.18852050
  0.90050000   2.18851605
  0.90050000   2.18851192
  0.90050000   2.18850806
  0.90050000   2.18850446
  0.90050000   2.18850108
  0.90050000   2.18849792
  0.90050000   2.18849493
  0.90050000   2.18849213
  0.90050000   2.18848947
  0.90050000   2.18848696
  0.90050000   2.18848458
  0.90050000   2.18848233
  0.90050000   2.18848019
  0.90050000   2.18847815
  0.90050000   2.18847620
  0.90050000   2.18847435
  0.90050000   2.18847258
  0.90050000   2.18847089
  0.90060000   2.18909237
  0.90060000   2.18908622
  0.90060000   2.18908057
  0.90060000   2.18907537
  0.90060000   2.18907057
  0.90060000   2.18906612
  0.90060000   2.18906199
  0.90060000   2.18905813
  0.90060000   2.18905452
  0.90060000   2.18905115
  0.90060000   2.18904798
  0.90060000   2.18904499
  0.90060000   2.18904218
  0.90060000   2.18903953
  0.90060000   2.18903702
  0.90060000   2.18903464
  0.90060000   2.18903238
  0.90060000   2.18903024
  0.90060000   2.18902820
  0.90060000   2.18902626
  0.90060000   2.18902440
  0.90060000   2.18902263
  0.90060000   2.18902094
  0.90070000   2.18964071
  0.90070000   2.18963455
  0.90070000   2.18962890
  0.90070000   2.18962371
  0.90070000   2.18961890
  0.90070000   2.18961445
  0.90070000   2.18961031
  0.90070000   2.18960645
  0.90070000   2.18960285
  0.90070000   2.18959947
  0.90070000   2.18959630
  0.90070000   2.18959332
  0.90070000   2.18959050
  0.90070000   2.18958785
  0.90070000   2.18958534
  0.90070000   2.18958296
  0.90070000   2.18958070
  0.90070000   2.18957855
  0.90070000   2.18957651
  0.90070000   2.18957457
  0.90070000   2.18957271
  0.90070000   2.18957094
  0.90070000   2.18956925
  0.90080000   2.19018731
  0.90080000   2.19018115
  0.90080000   2.19017551
  0.90080000   2.19017031
  0.90080000   2.19016550
  0.90080000   2.19016105
  0.90080000   2.19015691
  0.90080000   2.19015305
  0.90080000   2.19014944
  0.90080000   2.19014606
  0.90080000   2.19014289
  0.90080000   2.19013990
  0.90080000   2.19013709
  0.90080000   2.19013443
  0.90080000   2.19013192
  0.90080000   2.19012954
  0.90080000   2.19012728
  0.90080000   2.19012514
  0.90080000   2.19012309
  0.90080000   2.19012115
  0.90080000   2.19011929
  0.90080000   2.19011752
  0.90080000   2.19011583
  0.90090000   2.19073220
  0.90090000   2.19072604
  0.90090000   2.19072039
  0.90090000   2.19071519
  0.90090000   2.19071038
  0.90090000   2.19070593
  0.90090000   2.19070178
  0.90090000   2.19069792
  0.90090000   2.19069431
  0.90090000   2.19069093
  0.90090000   2.19068776
  0.90090000   2.19068477
  0.90090000   2.19068196
  0.90090000   2.19067930
  0.90090000   2.19067679
  0.90090000   2.19067440
  0.90090000   2.19067215
  0.90090000   2.19067000
  0.90090000   2.19066795
  0.90090000   2.19066601
  0.90090000   2.19066415
  0.90090000   2.19066238
  0.90090000   2.19066068
  0.90100000   2.19127537
  0.90100000   2.19126921
  0.90100000   2.19126356
  0.90100000   2.19125836
  0.90100000   2.19125355
  0.90100000   2.19124909
  0.90100000   2.19124495
  0.90100000   2.19124109
  0.90100000   2.19123748
  0.90100000   2.19123409
  0.90100000   2.19123092
  0.90100000   2.19122793
  0.90100000   2.19122511
  0.90100000   2.19122245
  0.90100000   2.19121994
  0.90100000   2.19121756
  0.90100000   2.19121530
  0.90100000   2.19121315
  0.90100000   2.19121110
  0.90100000   2.19120916
  0.90100000   2.19120730
  0.90100000   2.19120552
  0.90100000   2.19120383
  0.90110000   2.19181684
  0.90110000   2.19181068
  0.90110000   2.19180502
  0.90110000   2.19179982
  0.90110000   2.19179501
  0.90110000   2.19179055
  0.90110000   2.19178641
  0.90110000   2.19178254
  0.90110000   2.19177893
  0.90110000   2.19177555
  0.90110000   2.19177237
  0.90110000   2.19176938
  0.90110000   2.19176657
  0.90110000   2.19176391
  0.90110000   2.19176139
  0.90110000   2.19175901
  0.90110000   2.19175674
  0.90110000   2.19175459
  0.90110000   2.19175255
  0.90110000   2.19175060
  0.90110000   2.19174874
  0.90110000   2.19174697
  0.90110000   2.19174527
  0.90120000   2.19235661
  0.90120000   2.19235045
  0.90120000   2.19234480
  0.90120000   2.19233959
  0.90120000   2.19233478
  0.90120000   2.19233032
  0.90120000   2.19232617
  0.90120000   2.19232231
  0.90120000   2.19231870
  0.90120000   2.19231531
  0.90120000   2.19231213
  0.90120000   2.19230914
  0.90120000   2.19230632
  0.90120000   2.19230366
  0.90120000   2.19230114
  0.90120000   2.19229876
  0.90120000   2.19229650
  0.90120000   2.19229435
  0.90120000   2.19229230
  0.90120000   2.19229035
  0.90120000   2.19228849
  0.90120000   2.19228671
  0.90120000   2.19228502
  0.90130000   2.19289470
  0.90130000   2.19288854
  0.90130000   2.19288288
  0.90130000   2.19287767
  0.90130000   2.19287286
  0.90130000   2.19286840
  0.90130000   2.19286425
  0.90130000   2.19286039
  0.90130000   2.19285677
  0.90130000   2.19285339
  0.90130000   2.19285021
  0.90130000   2.19284722
  0.90130000   2.19284440
  0.90130000   2.19284173
  0.90130000   2.19283921
  0.90130000   2.19283683
  0.90130000   2.19283456
  0.90130000   2.19283241
  0.90130000   2.19283036
  0.90130000   2.19282841
  0.90130000   2.19282655
  0.90130000   2.19282478
  0.90130000   2.19282308
  0.90140000   2.19343111
  0.90140000   2.19342495
  0.90140000   2.19341929
  0.90140000   2.19341408
  0.90140000   2.19340927
  0.90140000   2.19340481
  0.90140000   2.19340066
  0.90140000   2.19339679
  0.90140000   2.19339317
  0.90140000   2.19338978
  0.90140000   2.19338660
  0.90140000   2.19338361
  0.90140000   2.19338079
  0.90140000   2.19337813
  0.90140000   2.19337561
  0.90140000   2.19337322
  0.90140000   2.19337095
  0.90140000   2.19336880
  0.90140000   2.19336675
  0.90140000   2.19336480
  0.90140000   2.19336294
  0.90140000   2.19336116
  0.90140000   2.19335946
  0.90150000   2.19396585
  0.90150000   2.19395969
  0.90150000   2.19395403
  0.90150000   2.19394882
  0.90150000   2.19394401
  0.90150000   2.19393954
  0.90150000   2.19393539
  0.90150000   2.19393152
  0.90150000   2.19392790
  0.90150000   2.19392452
  0.90150000   2.19392133
  0.90150000   2.19391834
  0.90150000   2.19391552
  0.90150000   2.19391285
  0.90150000   2.19391033
  0.90150000   2.19390794
  0.90150000   2.19390568
  0.90150000   2.19390352
  0.90150000   2.19390147
  0.90150000   2.19389952
  0.90150000   2.19389766
  0.90150000   2.19389588
  0.90150000   2.19389418
  0.90160000   2.19449894
  0.90160000   2.19449277
  0.90160000   2.19448711
  0.90160000   2.19448190
  0.90160000   2.19447708
  0.90160000   2.19447262
  0.90160000   2.19446847
  0.90160000   2.19446459
  0.90160000   2.19446098
  0.90160000   2.19445759
  0.90160000   2.19445440
  0.90160000   2.19445141
  0.90160000   2.19444858
  0.90160000   2.19444592
  0.90160000   2.19444340
  0.90160000   2.19444101
  0.90160000   2.19443874
  0.90160000   2.19443658
  0.90160000   2.19443453
  0.90160000   2.19443258
  0.90160000   2.19443072
  0.90160000   2.19442894
  0.90160000   2.19442724
  0.90170000   2.19503037
  0.90170000   2.19502420
  0.90170000   2.19501854
  0.90170000   2.19501333
  0.90170000   2.19500851
  0.90170000   2.19500404
  0.90170000   2.19499989
  0.90170000   2.19499602
  0.90170000   2.19499240
  0.90170000   2.19498900
  0.90170000   2.19498582
  0.90170000   2.19498282
  0.90170000   2.19498000
  0.90170000   2.19497733
  0.90170000   2.19497481
  0.90170000   2.19497242
  0.90170000   2.19497015
  0.90170000   2.19496799
  0.90170000   2.19496594
  0.90170000   2.19496399
  0.90170000   2.19496213
  0.90170000   2.19496035
  0.90170000   2.19495864
  0.90180000   2.19556016
  0.90180000   2.19555399
  0.90180000   2.19554833
  0.90180000   2.19554311
  0.90180000   2.19553829
  0.90180000   2.19553382
  0.90180000   2.19552967
  0.90180000   2.19552580
  0.90180000   2.19552217
  0.90180000   2.19551878
  0.90180000   2.19551560
  0.90180000   2.19551260
  0.90180000   2.19550977
  0.90180000   2.19550710
  0.90180000   2.19550458
  0.90180000   2.19550219
  0.90180000   2.19549992
  0.90180000   2.19549776
  0.90180000   2.19549571
  0.90180000   2.19549376
  0.90180000   2.19549189
  0.90180000   2.19549011
  0.90180000   2.19548841
  0.90190000   2.19608831
  0.90190000   2.19608214
  0.90190000   2.19607648
  0.90190000   2.19607126
  0.90190000   2.19606644
  0.90190000   2.19606197
  0.90190000   2.19605782
  0.90190000   2.19605394
  0.90190000   2.19605032
  0.90190000   2.19604692
  0.90190000   2.19604374
  0.90190000   2.19604074
  0.90190000   2.19603791
  0.90190000   2.19603524
  0.90190000   2.19603272
  0.90190000   2.19603032
  0.90190000   2.19602805
  0.90190000   2.19602590
  0.90190000   2.19602384
  0.90190000   2.19602189
  0.90190000   2.19602002
  0.90190000   2.19601824
  0.90190000   2.19601654
  0.90200000   2.19661484
  0.90200000   2.19660867
  0.90200000   2.19660300
  0.90200000   2.19659779
  0.90200000   2.19659296
  0.90200000   2.19658849
  0.90200000   2.19658434
  0.90200000   2.19658046
  0.90200000   2.19657684
  0.90200000   2.19657344
  0.90200000   2.19657025
  0.90200000   2.19656725
  0.90200000   2.19656442
  0.90200000   2.19656175
  0.90200000   2.19655923
  0.90200000   2.19655683
  0.90200000   2.19655456
  0.90200000   2.19655240
  0.90200000   2.19655035
  0.90200000   2.19654839
  0.90200000   2.19654653
  0.90200000   2.19654474
  0.90200000   2.19654304
  0.90210000   2.19713975
  0.90210000   2.19713357
  0.90210000   2.19712791
  0.90210000   2.19712269
  0.90210000   2.19711787
  0.90210000   2.19711340
  0.90210000   2.19710924
  0.90210000   2.19710536
  0.90210000   2.19710174
  0.90210000   2.19709834
  0.90210000   2.19709515
  0.90210000   2.19709215
  0.90210000   2.19708932
  0.90210000   2.19708665
  0.90210000   2.19708412
  0.90210000   2.19708173
  0.90210000   2.19707945
  0.90210000   2.19707729
  0.90210000   2.19707524
  0.90210000   2.19707328
  0.90210000   2.19707141
  0.90210000   2.19706963
  0.90210000   2.19706793
  0.90220000   2.19766306
  0.90220000   2.19765687
  0.90220000   2.19765121
  0.90220000   2.19764599
  0.90220000   2.19764117
  0.90220000   2.19763669
  0.90220000   2.19763253
  0.90220000   2.19762865
  0.90220000   2.19762503
  0.90220000   2.19762163
  0.90220000   2.19761844
  0.90220000   2.19761544
  0.90220000   2.19761261
  0.90220000   2.19760993
  0.90220000   2.19760740
  0.90220000   2.19760501
  0.90220000   2.19760274
  0.90220000   2.19760057
  0.90220000   2.19759852
  0.90220000   2.19759656
  0.90220000   2.19759469
  0.90220000   2.19759291
  0.90220000   2.19759120
  0.90230000   2.19818476
  0.90230000   2.19817857
  0.90230000   2.19817291
  0.90230000   2.19816769
  0.90230000   2.19816286
  0.90230000   2.19815839
  0.90230000   2.19815422
  0.90230000   2.19815034
  0.90230000   2.19814672
  0.90230000   2.19814332
  0.90230000   2.19814012
  0.90230000   2.19813712
  0.90230000   2.19813429
  0.90230000   2.19813162
  0.90230000   2.19812909
  0.90230000   2.19812669
  0.90230000   2.19812442
  0.90230000   2.19812225
  0.90230000   2.19812020
  0.90230000   2.19811824
  0.90230000   2.19811637
  0.90230000   2.19811458
  0.90230000   2.19811288
  0.90240000   2.19870486
  0.90240000   2.19869868
  0.90240000   2.19869301
  0.90240000   2.19868779
  0.90240000   2.19868296
  0.90240000   2.19867848
  0.90240000   2.19867432
  0.90240000   2.19867044
  0.90240000   2.19866681
  0.90240000   2.19866341
  0.90240000   2.19866022
  0.90240000   2.19865721
  0.90240000   2.19865438
  0.90240000   2.19865171
  0.90240000   2.19864918
  0.90240000   2.19864678
  0.90240000   2.19864450
  0.90240000   2.19864234
  0.90240000   2.19864028
  0.90240000   2.19863832
  0.90240000   2.19863645
  0.90240000   2.19863467
  0.90240000   2.19863296
  0.90250000   2.19922339
  0.90250000   2.19921720
  0.90250000   2.19921153
  0.90250000   2.19920631
  0.90250000   2.19920148
  0.90250000   2.19919700
  0.90250000   2.19919284
  0.90250000   2.19918895
  0.90250000   2.19918532
  0.90250000   2.19918192
  0.90250000   2.19917873
  0.90250000   2.19917572
  0.90250000   2.19917289
  0.90250000   2.19917021
  0.90250000   2.19916768
  0.90250000   2.19916528
  0.90250000   2.19916301
  0.90250000   2.19916084
  0.90250000   2.19915878
  0.90250000   2.19915682
  0.90250000   2.19915495
  0.90250000   2.19915316
  0.90250000   2.19915146
  0.90260000   2.19974033
  0.90260000   2.19973414
  0.90260000   2.19972847
  0.90260000   2.19972324
  0.90260000   2.19971842
  0.90260000   2.19971394
  0.90260000   2.19970977
  0.90260000   2.19970589
  0.90260000   2.19970226
  0.90260000   2.19969886
  0.90260000   2.19969566
  0.90260000   2.19969265
  0.90260000   2.19968982
  0.90260000   2.19968714
  0.90260000   2.19968461
  0.90260000   2.19968221
  0.90260000   2.19967993
  0.90260000   2.19967777
  0.90260000   2.19967571
  0.90260000   2.19967375
  0.90260000   2.19967187
  0.90260000   2.19967009
  0.90260000   2.19966838
  0.90270000   2.20025571
  0.90270000   2.20024951
  0.90270000   2.20024385
  0.90270000   2.20023862
  0.90270000   2.20023379
  0.90270000   2.20022931
  0.90270000   2.20022514
  0.90270000   2.20022125
  0.90270000   2.20021762
  0.90270000   2.20021422
  0.90270000   2.20021102
  0.90270000   2.20020801
  0.90270000   2.20020518
  0.90270000   2.20020250
  0.90270000   2.20019997
  0.90270000   2.20019757
  0.90270000   2.20019529
  0.90270000   2.20019312
  0.90270000   2.20019106
  0.90270000   2.20018910
  0.90270000   2.20018723
  0.90270000   2.20018544
  0.90270000   2.20018373
  0.90280000   2.20076952
  0.90280000   2.20076332
  0.90280000   2.20075766
  0.90280000   2.20075243
  0.90280000   2.20074760
  0.90280000   2.20074311
  0.90280000   2.20073895
  0.90280000   2.20073506
  0.90280000   2.20073143
  0.90280000   2.20072802
  0.90280000   2.20072482
  0.90280000   2.20072182
  0.90280000   2.20071898
  0.90280000   2.20071630
  0.90280000   2.20071376
  0.90280000   2.20071136
  0.90280000   2.20070908
  0.90280000   2.20070692
  0.90280000   2.20070486
  0.90280000   2.20070289
  0.90280000   2.20070102
  0.90280000   2.20069923
  0.90280000   2.20069752
  0.90290000   2.20128179
  0.90290000   2.20127558
  0.90290000   2.20126992
  0.90290000   2.20126468
  0.90290000   2.20125985
  0.90290000   2.20125537
  0.90290000   2.20125120
  0.90290000   2.20124731
  0.90290000   2.20124368
  0.90290000   2.20124027
  0.90290000   2.20123707
  0.90290000   2.20123406
  0.90290000   2.20123122
  0.90290000   2.20122854
  0.90290000   2.20122601
  0.90290000   2.20122361
  0.90290000   2.20122133
  0.90290000   2.20121916
  0.90290000   2.20121710
  0.90290000   2.20121513
  0.90290000   2.20121326
  0.90290000   2.20121147
  0.90290000   2.20120976
  0.90300000   2.20179250
  0.90300000   2.20178629
  0.90300000   2.20178063
  0.90300000   2.20177539
  0.90300000   2.20177056
  0.90300000   2.20176608
  0.90300000   2.20176191
  0.90300000   2.20175802
  0.90300000   2.20175438
  0.90300000   2.20175097
  0.90300000   2.20174778
  0.90300000   2.20174476
  0.90300000   2.20174193
  0.90300000   2.20173924
  0.90300000   2.20173671
  0.90300000   2.20173430
  0.90300000   2.20173202
  0.90300000   2.20172985
  0.90300000   2.20172779
  0.90300000   2.20172583
  0.90300000   2.20172395
  0.90300000   2.20172216
  0.90300000   2.20172045
  0.90310000   2.20230169
  0.90310000   2.20229547
  0.90310000   2.20228980
  0.90310000   2.20228457
  0.90310000   2.20227973
  0.90310000   2.20227525
  0.90310000   2.20227108
  0.90310000   2.20226719
  0.90310000   2.20226355
  0.90310000   2.20226014
  0.90310000   2.20225694
  0.90310000   2.20225393
  0.90310000   2.20225109
  0.90310000   2.20224841
  0.90310000   2.20224587
  0.90310000   2.20224346
  0.90310000   2.20224118
  0.90310000   2.20223901
  0.90310000   2.20223695
  0.90310000   2.20223498
  0.90310000   2.20223311
  0.90310000   2.20223132
  0.90310000   2.20222960
  0.90320000   2.20280934
  0.90320000   2.20280311
  0.90320000   2.20279745
  0.90320000   2.20279221
  0.90320000   2.20278738
  0.90320000   2.20278289
  0.90320000   2.20277872
  0.90320000   2.20277482
  0.90320000   2.20277119
  0.90320000   2.20276778
  0.90320000   2.20276458
  0.90320000   2.20276156
  0.90320000   2.20275872
  0.90320000   2.20275604
  0.90320000   2.20275350
  0.90320000   2.20275109
  0.90320000   2.20274881
  0.90320000   2.20274664
  0.90320000   2.20274458
  0.90320000   2.20274261
  0.90320000   2.20274073
  0.90320000   2.20273894
  0.90320000   2.20273723
  0.90330000   2.20331546
  0.90330000   2.20330923
  0.90330000   2.20330357
  0.90330000   2.20329833
  0.90330000   2.20329349
  0.90330000   2.20328901
  0.90330000   2.20328483
  0.90330000   2.20328094
  0.90330000   2.20327730
  0.90330000   2.20327389
  0.90330000   2.20327069
  0.90330000   2.20326767
  0.90330000   2.20326483
  0.90330000   2.20326215
  0.90330000   2.20325961
  0.90330000   2.20325720
  0.90330000   2.20325492
  0.90330000   2.20325275
  0.90330000   2.20325068
  0.90330000   2.20324871
  0.90330000   2.20324684
  0.90330000   2.20324504
  0.90330000   2.20324333
  0.90340000   2.20382008
  0.90340000   2.20381384
  0.90340000   2.20380818
  0.90340000   2.20380293
  0.90340000   2.20379810
  0.90340000   2.20379361
  0.90340000   2.20378943
  0.90340000   2.20378554
  0.90340000   2.20378190
  0.90340000   2.20377849
  0.90340000   2.20377528
  0.90340000   2.20377227
  0.90340000   2.20376943
  0.90340000   2.20376674
  0.90340000   2.20376420
  0.90340000   2.20376179
  0.90340000   2.20375951
  0.90340000   2.20375734
  0.90340000   2.20375527
  0.90340000   2.20375330
  0.90340000   2.20375142
  0.90340000   2.20374963
  0.90340000   2.20374792
  0.90350000   2.20432318
  0.90350000   2.20431693
  0.90350000   2.20431128
  0.90350000   2.20430603
  0.90350000   2.20430120
  0.90350000   2.20429670
  0.90350000   2.20429253
  0.90350000   2.20428863
  0.90350000   2.20428499
  0.90350000   2.20428158
  0.90350000   2.20427838
  0.90350000   2.20427536
  0.90350000   2.20427251
  0.90350000   2.20426983
  0.90350000   2.20426729
  0.90350000   2.20426488
  0.90350000   2.20426259
  0.90350000   2.20426042
  0.90350000   2.20425835
  0.90350000   2.20425638
  0.90350000   2.20425451
  0.90350000   2.20425271
  0.90350000   2.20425100
  0.90360000   2.20482479
  0.90360000   2.20481853
  0.90360000   2.20481288
  0.90360000   2.20480763
  0.90360000   2.20480279
  0.90360000   2.20479830
  0.90360000   2.20479412
  0.90360000   2.20479023
  0.90360000   2.20478659
  0.90360000   2.20478317
  0.90360000   2.20477996
  0.90360000   2.20477695
  0.90360000   2.20477410
  0.90360000   2.20477141
  0.90360000   2.20476887
  0.90360000   2.20476646
  0.90360000   2.20476418
  0.90360000   2.20476200
  0.90360000   2.20475994
  0.90360000   2.20475797
  0.90360000   2.20475609
  0.90360000   2.20475429
  0.90360000   2.20475258
  0.90370000   2.20532491
  0.90370000   2.20531863
  0.90370000   2.20531299
  0.90370000   2.20530773
  0.90370000   2.20530290
  0.90370000   2.20529840
  0.90370000   2.20529423
  0.90370000   2.20529033
  0.90370000   2.20528668
  0.90370000   2.20528327
  0.90370000   2.20528006
  0.90370000   2.20527704
  0.90370000   2.20527420
  0.90370000   2.20527151
  0.90370000   2.20526897
  0.90370000   2.20526656
  0.90370000   2.20526427
  0.90370000   2.20526210
  0.90370000   2.20526003
  0.90370000   2.20525806
  0.90370000   2.20525618
  0.90370000   2.20525438
  0.90370000   2.20525266
  0.90380000   2.20582354
  0.90380000   2.20581725
  0.90380000   2.20581161
  0.90380000   2.20580635
  0.90380000   2.20580152
  0.90380000   2.20579702
  0.90380000   2.20579284
  0.90380000   2.20578894
  0.90380000   2.20578530
  0.90380000   2.20578188
  0.90380000   2.20577867
  0.90380000   2.20577566
  0.90380000   2.20577281
  0.90380000   2.20577012
  0.90380000   2.20576757
  0.90380000   2.20576516
  0.90380000   2.20576288
  0.90380000   2.20576070
  0.90380000   2.20575863
  0.90380000   2.20575666
  0.90380000   2.20575478
  0.90380000   2.20575298
  0.90380000   2.20575126
  0.90390000   2.20632070
  0.90390000   2.20631439
  0.90390000   2.20630876
  0.90390000   2.20630349
  0.90390000   2.20629866
  0.90390000   2.20629416
  0.90390000   2.20628998
  0.90390000   2.20628608
  0.90390000   2.20628244
  0.90390000   2.20627902
  0.90390000   2.20627581
  0.90390000   2.20627279
  0.90390000   2.20626994
  0.90390000   2.20626725
  0.90390000   2.20626471
  0.90390000   2.20626229
  0.90390000   2.20626001
  0.90390000   2.20625783
  0.90390000   2.20625576
  0.90390000   2.20625379
  0.90390000   2.20625191
  0.90390000   2.20625011
  0.90390000   2.20624839
  0.90400000   2.20681638
  0.90400000   2.20681006
  0.90400000   2.20680444
  0.90400000   2.20679916
  0.90400000   2.20679433
  0.90400000   2.20678983
  0.90400000   2.20678565
  0.90400000   2.20678175
  0.90400000   2.20677810
  0.90400000   2.20677468
  0.90400000   2.20677147
  0.90400000   2.20676845
  0.90400000   2.20676560
  0.90400000   2.20676291
  0.90400000   2.20676037
  0.90400000   2.20675795
  0.90400000   2.20675566
  0.90400000   2.20675349
  0.90400000   2.20675142
  0.90400000   2.20674944
  0.90400000   2.20674756
  0.90400000   2.20674576
  0.90400000   2.20674404
  0.90410000   2.20731061
  0.90410000   2.20730426
  0.90410000   2.20729865
  0.90410000   2.20729337
  0.90410000   2.20728854
  0.90410000   2.20728403
  0.90410000   2.20727986
  0.90410000   2.20727595
  0.90410000   2.20727231
  0.90410000   2.20726889
  0.90410000   2.20726567
  0.90410000   2.20726265
  0.90410000   2.20725980
  0.90410000   2.20725711
  0.90410000   2.20725456
  0.90410000   2.20725215
  0.90410000   2.20724986
  0.90410000   2.20724768
  0.90410000   2.20724561
  0.90410000   2.20724364
  0.90410000   2.20724175
  0.90410000   2.20723995
  0.90410000   2.20723824
  0.90420000   2.20780338
  0.90420000   2.20779701
  0.90420000   2.20779141
  0.90420000   2.20778612
  0.90420000   2.20778129
  0.90420000   2.20777678
  0.90420000   2.20777261
  0.90420000   2.20776870
  0.90420000   2.20776505
  0.90420000   2.20776163
  0.90420000   2.20775842
  0.90420000   2.20775540
  0.90420000   2.20775254
  0.90420000   2.20774985
  0.90420000   2.20774730
  0.90420000   2.20774489
  0.90420000   2.20774260
  0.90420000   2.20774042
  0.90420000   2.20773835
  0.90420000   2.20773637
  0.90420000   2.20773449
  0.90420000   2.20773269
  0.90420000   2.20773097
  0.90430000   2.20829470
  0.90430000   2.20828830
  0.90430000   2.20828272
  0.90430000   2.20827742
  0.90430000   2.20827260
  0.90430000   2.20826808
  0.90430000   2.20826390
  0.90430000   2.20826000
  0.90430000   2.20825635
  0.90430000   2.20825293
  0.90430000   2.20824972
  0.90430000   2.20824669
  0.90430000   2.20824384
  0.90430000   2.20824115
  0.90430000   2.20823860
  0.90430000   2.20823618
  0.90430000   2.20823389
  0.90430000   2.20823171
  0.90430000   2.20822964
  0.90430000   2.20822766
  0.90430000   2.20822578
  0.90430000   2.20822398
  0.90430000   2.20822226
  0.90440000   2.20878458
  0.90440000   2.20877815
  0.90440000   2.20877258
  0.90440000   2.20876727
  0.90440000   2.20876246
  0.90440000   2.20875794
  0.90440000   2.20875376
  0.90440000   2.20874985
  0.90440000   2.20874620
  0.90440000   2.20874278
  0.90440000   2.20873957
  0.90440000   2.20873654
  0.90440000   2.20873369
  0.90440000   2.20873100
  0.90440000   2.20872845
  0.90440000   2.20872603
  0.90440000   2.20872374
  0.90440000   2.20872156
  0.90440000   2.20871948
  0.90440000   2.20871751
  0.90440000   2.20871562
  0.90440000   2.20871382
  0.90440000   2.20871210
  0.90450000   2.20927303
  0.90450000   2.20926657
  0.90450000   2.20926102
  0.90450000   2.20925570
  0.90450000   2.20925088
  0.90450000   2.20924636
  0.90450000   2.20924219
  0.90450000   2.20923827
  0.90450000   2.20923463
  0.90450000   2.20923120
  0.90450000   2.20922799
  0.90450000   2.20922496
  0.90450000   2.20922211
  0.90450000   2.20921941
  0.90450000   2.20921686
  0.90450000   2.20921445
  0.90450000   2.20921215
  0.90450000   2.20920997
  0.90450000   2.20920790
  0.90450000   2.20920592
  0.90450000   2.20920403
  0.90450000   2.20920223
  0.90450000   2.20920051
  0.90460000   2.20976006
  0.90460000   2.20975356
  0.90460000   2.20974802
  0.90460000   2.20974269
  0.90460000   2.20973788
  0.90460000   2.20973336
  0.90460000   2.20972918
  0.90460000   2.20972527
  0.90460000   2.20972162
  0.90460000   2.20971819
  0.90460000   2.20971498
  0.90460000   2.20971195
  0.90460000   2.20970910
  0.90460000   2.20970640
  0.90460000   2.20970385
  0.90460000   2.20970143
  0.90460000   2.20969914
  0.90460000   2.20969696
  0.90460000   2.20969488
  0.90460000   2.20969290
  0.90460000   2.20969102
  0.90460000   2.20968921
  0.90460000   2.20968749
  0.90470000   2.21024566
  0.90470000   2.21023912
  0.90470000   2.21023361
  0.90470000   2.21022826
  0.90470000   2.21022346
  0.90470000   2.21021893
  0.90470000   2.21021476
  0.90470000   2.21021084
  0.90470000   2.21020719
  0.90470000   2.21020376
  0.90470000   2.21020055
  0.90470000   2.21019752
  0.90470000   2.21019467
  0.90470000   2.21019197
  0.90470000   2.21018942
  0.90470000   2.21018700
  0.90470000   2.21018470
  0.90470000   2.21018252
  0.90470000   2.21018044
  0.90470000   2.21017847
  0.90470000   2.21017658
  0.90470000   2.21017478
  0.90470000   2.21017305
  0.90480000   2.21072986
  0.90480000   2.21072327
  0.90480000   2.21071778
  0.90480000   2.21071242
  0.90480000   2.21070763
  0.90480000   2.21070309
  0.90480000   2.21069892
  0.90480000   2.21069500
  0.90480000   2.21069135
  0.90480000   2.21068792
  0.90480000   2.21068470
  0.90480000   2.21068167
  0.90480000   2.21067882
  0.90480000   2.21067612
  0.90480000   2.21067357
  0.90480000   2.21067115
  0.90480000   2.21066885
  0.90480000   2.21066667
  0.90480000   2.21066459
  0.90480000   2.21066261
  0.90480000   2.21066073
  0.90480000   2.21065892
  0.90480000   2.21065720
  0.90490000   2.21121265
  0.90490000   2.21120600
  0.90490000   2.21120055
  0.90490000   2.21119517
  0.90490000   2.21119038
  0.90490000   2.21118584
  0.90490000   2.21118167
  0.90490000   2.21117775
  0.90490000   2.21117410
  0.90490000   2.21117067
  0.90490000   2.21116745
  0.90490000   2.21116442
  0.90490000   2.21116157
  0.90490000   2.21115887
  0.90490000   2.21115631
  0.90490000   2.21115389
  0.90490000   2.21115160
  0.90490000   2.21114941
  0.90490000   2.21114733
  0.90490000   2.21114536
  0.90490000   2.21114347
  0.90490000   2.21114166
  0.90490000   2.21113994
  0.90500000   2.21169404
  0.90500000   2.21168734
  0.90500000   2.21168192
  0.90500000   2.21167651
  0.90500000   2.21167174
  0.90500000   2.21166719
  0.90500000   2.21166302
  0.90500000   2.21165910
  0.90500000   2.21165545
  0.90500000   2.21165202
  0.90500000   2.21164880
  0.90500000   2.21164577
  0.90500000   2.21164291
  0.90500000   2.21164021
  0.90500000   2.21163766
  0.90500000   2.21163524
  0.90500000   2.21163294
  0.90500000   2.21163075
  0.90500000   2.21162868
  0.90500000   2.21162670
  0.90500000   2.21162481
  0.90500000   2.21162300
  0.90500000   2.21162128
  0.90510000   2.21217405
  0.90510000   2.21216727
  0.90510000   2.21216189
  0.90510000   2.21215646
  0.90510000   2.21215171
  0.90510000   2.21214714
  0.90510000   2.21214298
  0.90510000   2.21213905
  0.90510000   2.21213541
  0.90510000   2.21213197
  0.90510000   2.21212875
  0.90510000   2.21212572
  0.90510000   2.21212286
  0.90510000   2.21212016
  0.90510000   2.21211761
  0.90510000   2.21211519
  0.90510000   2.21211289
  0.90510000   2.21211070
  0.90510000   2.21210862
  0.90510000   2.21210664
  0.90510000   2.21210475
  0.90510000   2.21210295
  0.90510000   2.21210122
  0.90520000   2.21265267
  0.90520000   2.21264582
  0.90520000   2.21264048
  0.90520000   2.21263503
  0.90520000   2.21263028
  0.90520000   2.21262571
  0.90520000   2.21262155
  0.90520000   2.21261762
  0.90520000   2.21261398
  0.90520000   2.21261054
  0.90520000   2.21260732
  0.90520000   2.21260429
  0.90520000   2.21260143
  0.90520000   2.21259873
  0.90520000   2.21259617
  0.90520000   2.21259375
  0.90520000   2.21259145
  0.90520000   2.21258927
  0.90520000   2.21258719
  0.90520000   2.21258520
  0.90520000   2.21258331
  0.90520000   2.21258151
  0.90520000   2.21257978
  0.90530000   2.21312992
  0.90530000   2.21312298
  0.90530000   2.21311770
  0.90530000   2.21311221
  0.90530000   2.21310748
  0.90530000   2.21310290
  0.90530000   2.21309875
  0.90530000   2.21309481
  0.90530000   2.21309116
  0.90530000   2.21308773
  0.90530000   2.21308451
  0.90530000   2.21308147
  0.90530000   2.21307862
  0.90530000   2.21307591
  0.90530000   2.21307336
  0.90530000   2.21307093
  0.90530000   2.21306863
  0.90530000   2.21306645
  0.90530000   2.21306437
  0.90530000   2.21306238
  0.90530000   2.21306049
  0.90530000   2.21305869
  0.90530000   2.21305696
  0.90540000   2.21360580
  0.90540000   2.21359877
  0.90540000   2.21359354
  0.90540000   2.21358802
  0.90540000   2.21358331
  0.90540000   2.21357871
  0.90540000   2.21357457
  0.90540000   2.21357062
  0.90540000   2.21356698
  0.90540000   2.21356354
  0.90540000   2.21356032
  0.90540000   2.21355729
  0.90540000   2.21355443
  0.90540000   2.21355172
  0.90540000   2.21354917
  0.90540000   2.21354674
  0.90540000   2.21354444
  0.90540000   2.21354225
  0.90540000   2.21354017
  0.90540000   2.21353819
  0.90540000   2.21353630
  0.90540000   2.21353449
  0.90540000   2.21353276
  0.90550000   2.21408032
  0.90550000   2.21407318
  0.90550000   2.21406801
  0.90550000   2.21406246
  0.90550000   2.21405777
  0.90550000   2.21405316
  0.90550000   2.21404902
  0.90550000   2.21404507
  0.90550000   2.21404143
  0.90550000   2.21403799
  0.90550000   2.21403477
  0.90550000   2.21403173
  0.90550000   2.21402887
  0.90550000   2.21402617
  0.90550000   2.21402361
  0.90550000   2.21402118
  0.90550000   2.21401888
  0.90550000   2.21401670
  0.90550000   2.21401461
  0.90550000   2.21401263
  0.90550000   2.21401074
  0.90550000   2.21400893
  0.90550000   2.21400720
  0.90560000   2.21455349
  0.90560000   2.21454623
  0.90560000   2.21454113
  0.90560000   2.21453553
  0.90560000   2.21453086
  0.90560000   2.21452624
  0.90560000   2.21452211
  0.90560000   2.21451816
  0.90560000   2.21451452
  0.90560000   2.21451107
  0.90560000   2.21450785
  0.90560000   2.21450481
  0.90560000   2.21450195
  0.90560000   2.21449925
  0.90560000   2.21449669
  0.90560000   2.21449426
  0.90560000   2.21449196
  0.90560000   2.21448977
  0.90560000   2.21448769
  0.90560000   2.21448571
  0.90560000   2.21448381
  0.90560000   2.21448201
  0.90560000   2.21448028
  0.90570000   2.21502531
  0.90570000   2.21501792
  0.90570000   2.21501290
  0.90570000   2.21500725
  0.90570000   2.21500261
  0.90570000   2.21499797
  0.90570000   2.21499385
  0.90570000   2.21498989
  0.90570000   2.21498625
  0.90570000   2.21498280
  0.90570000   2.21497958
  0.90570000   2.21497654
  0.90570000   2.21497368
  0.90570000   2.21497098
  0.90570000   2.21496842
  0.90570000   2.21496599
  0.90570000   2.21496369
  0.90570000   2.21496150
  0.90570000   2.21495942
  0.90570000   2.21495743
  0.90570000   2.21495554
  0.90570000   2.21495373
  0.90570000   2.21495200
  0.90580000   2.21549579
  0.90580000   2.21548826
  0.90580000   2.21548332
  0.90580000   2.21547762
  0.90580000   2.21547301
  0.90580000   2.21546835
  0.90580000   2.21546424
  0.90580000   2.21546027
  0.90580000   2.21545664
  0.90580000   2.21545319
  0.90580000   2.21544997
  0.90580000   2.21544693
  0.90580000   2.21544407
  0.90580000   2.21544136
  0.90580000   2.21543880
  0.90580000   2.21543637
  0.90580000   2.21543407
  0.90580000   2.21543188
  0.90580000   2.21542980
  0.90580000   2.21542781
  0.90580000   2.21542592
  0.90580000   2.21542411
  0.90580000   2.21542238
  0.90590000   2.21596494
  0.90590000   2.21595725
  0.90590000   2.21595240
  0.90590000   2.21594664
  0.90590000   2.21594207
  0.90590000   2.21593739
  0.90590000   2.21593329
  0.90590000   2.21592931
  0.90590000   2.21592568
  0.90590000   2.21592223
  0.90590000   2.21591901
  0.90590000   2.21591597
  0.90590000   2.21591311
  0.90590000   2.21591040
  0.90590000   2.21590784
  0.90590000   2.21590541
  0.90590000   2.21590311
  0.90590000   2.21590092
  0.90590000   2.21589883
  0.90590000   2.21589685
  0.90590000   2.21589495
  0.90590000   2.21589314
  0.90590000   2.21589141
  0.90600000   2.21643276
  0.90600000   2.21642489
  0.90600000   2.21642016
  0.90600000   2.21641433
  0.90600000   2.21640980
  0.90600000   2.21640509
  0.90600000   2.21640100
  0.90600000   2.21639702
  0.90600000   2.21639339
  0.90600000   2.21638993
  0.90600000   2.21638672
  0.90600000   2.21638367
  0.90600000   2.21638081
  0.90600000   2.21637810
  0.90600000   2.21637554
  0.90600000   2.21637311
  0.90600000   2.21637081
  0.90600000   2.21636862
  0.90600000   2.21636653
  0.90600000   2.21636455
  0.90600000   2.21636265
  0.90600000   2.21636084
  0.90600000   2.21635911
  0.90610000   2.21689927
  0.90610000   2.21689121
  0.90610000   2.21688659
  0.90610000   2.21688069
  0.90610000   2.21687620
  0.90610000   2.21687146
  0.90610000   2.21686739
  0.90610000   2.21686339
  0.90610000   2.21685977
  0.90610000   2.21685631
  0.90610000   2.21685310
  0.90610000   2.21685005
  0.90610000   2.21684719
  0.90610000   2.21684448
  0.90610000   2.21684192
  0.90610000   2.21683949
  0.90610000   2.21683718
  0.90610000   2.21683499
  0.90610000   2.21683291
  0.90610000   2.21683092
  0.90610000   2.21682902
  0.90610000   2.21682721
  0.90610000   2.21682548
  0.90620000   2.21736447
  0.90620000   2.21735619
  0.90620000   2.21735170
  0.90620000   2.21734572
  0.90620000   2.21734128
  0.90620000   2.21733651
  0.90620000   2.21733246
  0.90620000   2.21732845
  0.90620000   2.21732483
  0.90620000   2.21732137
  0.90620000   2.21731815
  0.90620000   2.21731510
  0.90620000   2.21731224
  0.90620000   2.21730953
  0.90620000   2.21730697
  0.90620000   2.21730454
  0.90620000   2.21730223
  0.90620000   2.21730004
  0.90620000   2.21729796
  0.90620000   2.21729597
  0.90620000   2.21729407
  0.90620000   2.21729226
  0.90620000   2.21729053
  0.90630000   2.21782836
  0.90630000   2.21781984
  0.90630000   2.21781550
  0.90630000   2.21780943
  0.90630000   2.21780504
  0.90630000   2.21780024
  0.90630000   2.21779621
  0.90630000   2.21779219
  0.90630000   2.21778858
  0.90630000   2.21778510
  0.90630000   2.21778190
  0.90630000   2.21777884
  0.90630000   2.21777598
  0.90630000   2.21777327
  0.90630000   2.21777071
  0.90630000   2.21776828
  0.90630000   2.21776597
  0.90630000   2.21776378
  0.90630000   2.21776169
  0.90630000   2.21775970
  0.90630000   2.21775781
  0.90630000   2.21775599
  0.90630000   2.21775426
  0.90640000   2.21829096
  0.90640000   2.21828218
  0.90640000   2.21827800
  0.90640000   2.21827182
  0.90640000   2.21826750
  0.90640000   2.21826266
  0.90640000   2.21825865
  0.90640000   2.21825461
  0.90640000   2.21825101
  0.90640000   2.21824753
  0.90640000   2.21824433
  0.90640000   2.21824127
  0.90640000   2.21823841
  0.90640000   2.21823570
  0.90640000   2.21823313
  0.90640000   2.21823070
  0.90640000   2.21822840
  0.90640000   2.21822620
  0.90640000   2.21822411
  0.90640000   2.21822213
  0.90640000   2.21822023
  0.90640000   2.21821842
  0.90640000   2.21821668
  0.90650000   2.21875227
  0.90650000   2.21874320
  0.90650000   2.21873920
  0.90650000   2.21873291
  0.90650000   2.21872866
  0.90650000   2.21872377
  0.90650000   2.21871979
  0.90650000   2.21871573
  0.90650000   2.21871215
  0.90650000   2.21870866
  0.90650000   2.21870545
  0.90650000   2.21870239
  0.90650000   2.21869954
  0.90650000   2.21869682
  0.90650000   2.21869426
  0.90650000   2.21869182
  0.90650000   2.21868952
  0.90650000   2.21868732
  0.90650000   2.21868524
  0.90650000   2.21868325
  0.90650000   2.21868135
  0.90650000   2.21867953
  0.90650000   2.21867780
  0.90660000   2.21921229
  0.90660000   2.21920291
  0.90660000   2.21919912
  0.90660000   2.21919270
  0.90660000   2.21918853
  0.90660000   2.21918358
  0.90660000   2.21917963
  0.90660000   2.21917556
  0.90660000   2.21917198
  0.90660000   2.21916848
  0.90660000   2.21916529
  0.90660000   2.21916222
  0.90660000   2.21915936
  0.90660000   2.21915665
  0.90660000   2.21915408
  0.90660000   2.21915165
  0.90660000   2.21914934
  0.90660000   2.21914715
  0.90660000   2.21914506
  0.90660000   2.21914307
  0.90660000   2.21914117
  0.90660000   2.21913936
  0.90660000   2.21913762
  0.90670000   2.21967105
  0.90670000   2.21966132
  0.90670000   2.21965774
  0.90670000   2.21965118
  0.90670000   2.21964710
  0.90670000   2.21964210
  0.90670000   2.21963819
  0.90670000   2.21963409
  0.90670000   2.21963052
  0.90670000   2.21962702
  0.90670000   2.21962382
  0.90670000   2.21962076
  0.90670000   2.21961790
  0.90670000   2.21961518
  0.90670000   2.21961262
  0.90670000   2.21961018
  0.90670000   2.21960788
  0.90670000   2.21960568
  0.90670000   2.21960359
  0.90670000   2.21960160
  0.90670000   2.21959970
  0.90670000   2.21959789
  0.90670000   2.21959615
  0.90680000   2.22012854
  0.90680000   2.22011843
  0.90680000   2.22011509
  0.90680000   2.22010838
  0.90680000   2.22010439
  0.90680000   2.22009933
  0.90680000   2.22009546
  0.90680000   2.22009133
  0.90680000   2.22008778
  0.90680000   2.22008427
  0.90680000   2.22008108
  0.90680000   2.22007801
  0.90680000   2.22007515
  0.90680000   2.22007243
  0.90680000   2.22006987
  0.90680000   2.22006743
  0.90680000   2.22006512
  0.90680000   2.22006293
  0.90680000   2.22006084
  0.90680000   2.22005885
  0.90680000   2.22005695
  0.90680000   2.22005513
  0.90680000   2.22005340
  0.90690000   2.22058477
  0.90690000   2.22057425
  0.90690000   2.22057118
  0.90690000   2.22056429
  0.90690000   2.22056041
  0.90690000   2.22055528
  0.90690000   2.22055145
  0.90690000   2.22054729
  0.90690000   2.22054376
  0.90690000   2.22054023
  0.90690000   2.22053705
  0.90690000   2.22053398
  0.90690000   2.22053112
  0.90690000   2.22052840
  0.90690000   2.22052584
  0.90690000   2.22052340
  0.90690000   2.22052109
  0.90690000   2.22051889
  0.90690000   2.22051681
  0.90690000   2.22051481
  0.90690000   2.22051291
  0.90690000   2.22051110
  0.90690000   2.22050936
  0.90700000   2.22103974
  0.90700000   2.22102877
  0.90700000   2.22102599
  0.90700000   2.22101892
  0.90700000   2.22101516
  0.90700000   2.22100995
  0.90700000   2.22100617
  0.90700000   2.22100198
  0.90700000   2.22099847
  0.90700000   2.22099493
  0.90700000   2.22099175
  0.90700000   2.22098867
  0.90700000   2.22098582
  0.90700000   2.22098309
  0.90700000   2.22098053
  0.90700000   2.22097809
  0.90700000   2.22097579
  0.90700000   2.22097359
  0.90700000   2.22097150
  0.90700000   2.22096951
  0.90700000   2.22096760
  0.90700000   2.22096579
  0.90700000   2.22096405
  0.90710000   2.22149348
  0.90710000   2.22148202
  0.90710000   2.22147956
  0.90710000   2.22147227
  0.90710000   2.22146865
  0.90710000   2.22146335
  0.90710000   2.22145962
  0.90710000   2.22145540
  0.90710000   2.22145191
  0.90710000   2.22144835
  0.90710000   2.22144519
  0.90710000   2.22144210
  0.90710000   2.22143925
  0.90710000   2.22143652
  0.90710000   2.22143396
  0.90710000   2.22143152
  0.90710000   2.22142921
  0.90710000   2.22142701
  0.90710000   2.22142492
  0.90710000   2.22142293
  0.90710000   2.22142103
  0.90710000   2.22141921
  0.90710000   2.22141748
  0.90720000   2.22194597
  0.90720000   2.22193398
  0.90720000   2.22193187
  0.90720000   2.22192436
  0.90720000   2.22192088
  0.90720000   2.22191549
  0.90720000   2.22191182
  0.90720000   2.22190755
  0.90720000   2.22190409
  0.90720000   2.22190052
  0.90720000   2.22189736
  0.90720000   2.22189426
  0.90720000   2.22189142
  0.90720000   2.22188869
  0.90720000   2.22188613
  0.90720000   2.22188369
  0.90720000   2.22188138
  0.90720000   2.22187918
  0.90720000   2.22187709
  0.90720000   2.22187509
  0.90720000   2.22187319
  0.90720000   2.22187138
  0.90720000   2.22186964
  0.90730000   2.22239724
  0.90730000   2.22238467
  0.90730000   2.22238294
  0.90730000   2.22237517
  0.90730000   2.22237186
  0.90730000   2.22236636
  0.90730000   2.22236276
  0.90730000   2.22235845
  0.90730000   2.22235502
  0.90730000   2.22235142
  0.90730000   2.22234828
  0.90730000   2.22234517
  0.90730000   2.22234233
  0.90730000   2.22233960
  0.90730000   2.22233704
  0.90730000   2.22233460
  0.90730000   2.22233229
  0.90730000   2.22233009
  0.90730000   2.22232800
  0.90730000   2.22232600
  0.90730000   2.22232410
  0.90730000   2.22232228
  0.90730000   2.22232055
  0.90740000   2.22284729
  0.90740000   2.22283409
  0.90740000   2.22283277
  0.90740000   2.22282473
  0.90740000   2.22282160
  0.90740000   2.22281598
  0.90740000   2.22281246
  0.90740000   2.22280810
  0.90740000   2.22280469
  0.90740000   2.22280108
  0.90740000   2.22279795
  0.90740000   2.22279483
  0.90740000   2.22279200
  0.90740000   2.22278926
  0.90740000   2.22278670
  0.90740000   2.22278425
  0.90740000   2.22278195
  0.90740000   2.22277975
  0.90740000   2.22277766
  0.90740000   2.22277566
  0.90740000   2.22277376
  0.90740000   2.22277194
  0.90740000   2.22277020
  0.90750000   2.22329612
  0.90750000   2.22328224
  0.90750000   2.22328137
  0.90750000   2.22327304
  0.90750000   2.22327010
  0.90750000   2.22326435
  0.90750000   2.22326091
  0.90750000   2.22325649
  0.90750000   2.22325313
  0.90750000   2.22324949
  0.90750000   2.22324637
  0.90750000   2.22324324
  0.90750000   2.22324042
  0.90750000   2.22323767
  0.90750000   2.22323512
  0.90750000   2.22323267
  0.90750000   2.22323036
  0.90750000   2.22322816
  0.90750000   2.22322607
  0.90750000   2.22322407
  0.90750000   2.22322217
  0.90750000   2.22322035
  0.90750000   2.22321861
  0.90760000   2.22374374
  0.90760000   2.22372913
  0.90760000   2.22372875
  0.90760000   2.22372009
  0.90760000   2.22371737
  0.90760000   2.22371147
  0.90760000   2.22370813
  0.90760000   2.22370365
  0.90760000   2.22370033
  0.90760000   2.22369665
  0.90760000   2.22369356
  0.90760000   2.22369042
  0.90760000   2.22368760
  0.90760000   2.22368485
  0.90760000   2.22368230
  0.90760000   2.22367985
  0.90760000   2.22367754
  0.90760000   2.22367534
  0.90760000   2.22367325
  0.90760000   2.22367125
  0.90760000   2.22366935
  0.90760000   2.22366753
  0.90760000   2.22366579
  0.90770000   2.22419017
  0.90770000   2.22417476
  0.90770000   2.22417492
  0.90770000   2.22416590
  0.90770000   2.22416342
  0.90770000   2.22415736
  0.90770000   2.22415413
  0.90770000   2.22414957
  0.90770000   2.22414629
  0.90770000   2.22414259
  0.90770000   2.22413951
  0.90770000   2.22413636
  0.90770000   2.22413355
  0.90770000   2.22413079
  0.90770000   2.22412824
  0.90770000   2.22412579
  0.90770000   2.22412349
  0.90770000   2.22412128
  0.90770000   2.22411919
  0.90770000   2.22411719
  0.90770000   2.22411529
  0.90770000   2.22411347
  0.90770000   2.22411173
  0.90780000   2.22463540
  0.90780000   2.22461914
  0.90780000   2.22461987
  0.90780000   2.22461047
  0.90780000   2.22460824
  0.90780000   2.22460201
  0.90780000   2.22459890
  0.90780000   2.22459426
  0.90780000   2.22459103
  0.90780000   2.22458730
  0.90780000   2.22458424
  0.90780000   2.22458107
  0.90780000   2.22457827
  0.90780000   2.22457550
  0.90780000   2.22457296
  0.90780000   2.22457051
  0.90780000   2.22456820
  0.90780000   2.22456599
  0.90780000   2.22456390
  0.90780000   2.22456190
  0.90780000   2.22456000
  0.90780000   2.22455818
  0.90780000   2.22455644
  0.90790000   2.22507945
  0.90790000   2.22506228
  0.90790000   2.22506363
  0.90790000   2.22505380
  0.90790000   2.22505186
  0.90790000   2.22504544
  0.90790000   2.22504245
  0.90790000   2.22503773
  0.90790000   2.22503456
  0.90790000   2.22503078
  0.90790000   2.22502775
  0.90790000   2.22502456
  0.90790000   2.22502177
  0.90790000   2.22501900
  0.90790000   2.22501646
  0.90790000   2.22501400
  0.90790000   2.22501170
  0.90790000   2.22500949
  0.90790000   2.22500740
  0.90790000   2.22500540
  0.90790000   2.22500350
  0.90790000   2.22500167
  0.90790000   2.22499993
  0.90800000   2.22552231
  0.90800000   2.22550417
  0.90800000   2.22550618
  0.90800000   2.22549590
  0.90800000   2.22549427
  0.90800000   2.22548764
  0.90800000   2.22548479
  0.90800000   2.22547997
  0.90800000   2.22547687
  0.90800000   2.22547304
  0.90800000   2.22547004
  0.90800000   2.22546684
  0.90800000   2.22546406
  0.90800000   2.22546127
  0.90800000   2.22545874
  0.90800000   2.22545628
  0.90800000   2.22545398
  0.90800000   2.22545177
  0.90800000   2.22544968
  0.90800000   2.22544767
  0.90800000   2.22544577
  0.90800000   2.22544395
  0.90800000   2.22544221
  0.90810000   2.22596401
  0.90810000   2.22594481
  0.90810000   2.22594755
  0.90810000   2.22593677
  0.90810000   2.22593548
  0.90810000   2.22592862
  0.90810000   2.22592593
  0.90810000   2.22592100
  0.90810000   2.22591797
  0.90810000   2.22591410
  0.90810000   2.22591113
  0.90810000   2.22590790
  0.90810000   2.22590514
  0.90810000   2.22590234
  0.90810000   2.22589982
  0.90810000   2.22589734
  0.90810000   2.22589505
  0.90810000   2.22589283
  0.90810000   2.22589075
  0.90810000   2.22588874
  0.90810000   2.22588684
  0.90810000   2.22588502
  0.90810000   2.22588328
  0.90820000   2.22640454
  0.90820000   2.22638423
  0.90820000   2.22638774
  0.90820000   2.22637643
  0.90820000   2.22637550
  0.90820000   2.22636838
  0.90820000   2.22636586
  0.90820000   2.22636082
  0.90820000   2.22635787
  0.90820000   2.22635394
  0.90820000   2.22635101
  0.90820000   2.22634776
  0.90820000   2.22634501
  0.90820000   2.22634220
  0.90820000   2.22633968
  0.90820000   2.22633721
  0.90820000   2.22633491
  0.90820000   2.22633270
  0.90820000   2.22633061
  0.90820000   2.22632860
  0.90820000   2.22632670
  0.90820000   2.22632488
  0.90820000   2.22632314
  0.90830000   2.22684392
  0.90830000   2.22682241
  0.90830000   2.22682675
  0.90830000   2.22681486
  0.90830000   2.22681433
  0.90830000   2.22680694
  0.90830000   2.22680461
  0.90830000   2.22679944
  0.90830000   2.22679657
  0.90830000   2.22679259
  0.90830000   2.22678970
  0.90830000   2.22678641
  0.90830000   2.22678368
  0.90830000   2.22678086
  0.90830000   2.22677835
  0.90830000   2.22677587
  0.90830000   2.22677358
  0.90830000   2.22677136
  0.90830000   2.22676927
  0.90830000   2.22676727
  0.90830000   2.22676537
  0.90830000   2.22676354
  0.90830000   2.22676180
  0.90840000   2.22728214
  0.90840000   2.22725937
  0.90840000   2.22726459
  0.90840000   2.22725209
  0.90840000   2.22725198
  0.90840000   2.22724430
  0.90840000   2.22724217
  0.90840000   2.22723686
  0.90840000   2.22723409
  0.90840000   2.22723003
  0.90840000   2.22722719
  0.90840000   2.22722387
  0.90840000   2.22722116
  0.90840000   2.22721833
  0.90840000   2.22721583
  0.90840000   2.22721334
  0.90840000   2.22721105
  0.90840000   2.22720883
  0.90840000   2.22720674
  0.90840000   2.22720474
  0.90840000   2.22720283
  0.90840000   2.22720101
  0.90840000   2.22719927
  0.90850000   2.22771922
  0.90850000   2.22769510
  0.90850000   2.22770127
  0.90850000   2.22768810
  0.90850000   2.22768846
  0.90850000   2.22768045
  0.90850000   2.22767855
  0.90850000   2.22767308
  0.90850000   2.22767042
  0.90850000   2.22766629
  0.90850000   2.22766349
  0.90850000   2.22766014
  0.90850000   2.22765746
  0.90850000   2.22765460
  0.90850000   2.22765212
  0.90850000   2.22764962
  0.90850000   2.22764734
  0.90850000   2.22764511
  0.90850000   2.22764303
  0.90850000   2.22764102
  0.90850000   2.22763911
  0.90850000   2.22763729
  0.90850000   2.22763555
  0.90860000   2.22815516
  0.90860000   2.22812962
  0.90860000   2.22813679
  0.90860000   2.22812292
  0.90860000   2.22812377
  0.90860000   2.22811541
  0.90860000   2.22811375
  0.90860000   2.22810811
  0.90860000   2.22810557
  0.90860000   2.22810136
  0.90860000   2.22809862
  0.90860000   2.22809523
  0.90860000   2.22809257
  0.90860000   2.22808970
  0.90860000   2.22808722
  0.90860000   2.22808471
  0.90860000   2.22808244
  0.90860000   2.22808020
  0.90860000   2.22807812
  0.90860000   2.22807611
  0.90860000   2.22807421
  0.90860000   2.22807238
  0.90860000   2.22807065
  0.90870000   2.22858997
  0.90870000   2.22856292
  0.90870000   2.22857116
  0.90870000   2.22855653
  0.90870000   2.22855792
  0.90870000   2.22854919
  0.90870000   2.22854778
  0.90870000   2.22854196
  0.90870000   2.22853954
  0.90870000   2.22853524
  0.90870000   2.22853257
  0.90870000   2.22852913
  0.90870000   2.22852651
  0.90870000   2.22852361
  0.90870000   2.22852115
  0.90870000   2.22851863
  0.90870000   2.22851636
  0.90870000   2.22851412
  0.90870000   2.22851205
  0.90870000   2.22851003
  0.90870000   2.22850813
  0.90870000   2.22850630
  0.90870000   2.22850456
  0.90880000   2.22902364
  0.90880000   2.22899502
  0.90880000   2.22900438
  0.90880000   2.22898895
  0.90880000   2.22899091
  0.90880000   2.22898177
  0.90880000   2.22898066
  0.90880000   2.22897463
  0.90880000   2.22897235
  0.90880000   2.22896796
  0.90880000   2.22896535
  0.90880000   2.22896186
  0.90880000   2.22895927
  0.90880000   2.22895635
  0.90880000   2.22895391
  0.90880000   2.22895137
  0.90880000   2.22894911
  0.90880000   2.22894687
  0.90880000   2.22894480
  0.90880000   2.22894278
  0.90880000   2.22894088
  0.90880000   2.22893905
  0.90880000   2.22893731
  0.90890000   2.22945619
  0.90890000   2.22942591
  0.90890000   2.22943647
  0.90890000   2.22942018
  0.90890000   2.22942275
  0.90890000   2.22941318
  0.90890000   2.22941237
  0.90890000   2.22940613
  0.90890000   2.22940400
  0.90890000   2.22939950
  0.90890000   2.22939696
  0.90890000   2.22939343
  0.90890000   2.22939087
  0.90890000   2.22938792
  0.90890000   2.22938550
  0.90890000   2.22938295
  0.90890000   2.22938070
  0.90890000   2.22937845
  0.90890000   2.22937638
  0.90890000   2.22937436
  0.90890000   2.22937246
  0.90890000   2.22937063
  0.90890000   2.22936889
  0.90900000   2.22988762
  0.90900000   2.22985561
  0.90900000   2.22986741
  0.90900000   2.22985023
  0.90900000   2.22985344
  0.90900000   2.22984341
  0.90900000   2.22984293
  0.90900000   2.22983646
  0.90900000   2.22983450
  0.90900000   2.22982987
  0.90900000   2.22982742
  0.90900000   2.22982382
  0.90900000   2.22982131
  0.90900000   2.22981833
  0.90900000   2.22981592
  0.90900000   2.22981337
  0.90900000   2.22981112
  0.90900000   2.22980886
  0.90900000   2.22980680
  0.90900000   2.22980478
  0.90900000   2.22980288
  0.90900000   2.22980105
  0.90900000   2.22979931
  0.90910000   2.23031793
  0.90910000   2.23028412
  0.90910000   2.23029723
  0.90910000   2.23027910
  0.90910000   2.23028300
  0.90910000   2.23027248
  0.90910000   2.23027235
  0.90910000   2.23026562
  0.90910000   2.23026384
  0.90910000   2.23025908
  0.90910000   2.23025672
  0.90910000   2.23025306
  0.90910000   2.23025059
  0.90910000   2.23024758
  0.90910000   2.23024520
  0.90910000   2.23024262
  0.90910000   2.23024039
  0.90910000   2.23023812
  0.90910000   2.23023607
  0.90910000   2.23023404
  0.90910000   2.23023214
  0.90910000   2.23023031
  0.90910000   2.23022857
  0.90920000   2.23074712
  0.90920000   2.23071145
  0.90920000   2.23072593
  0.90920000   2.23070680
  0.90920000   2.23071142
  0.90920000   2.23070037
  0.90920000   2.23070062
  0.90920000   2.23069362
  0.90920000   2.23069203
  0.90920000   2.23068714
  0.90920000   2.23068488
  0.90920000   2.23068115
  0.90920000   2.23067873
  0.90920000   2.23067568
  0.90920000   2.23067332
  0.90920000   2.23067073
  0.90920000   2.23066851
  0.90920000   2.23066623
  0.90920000   2.23066418
  0.90920000   2.23066214
  0.90920000   2.23066026
  0.90920000   2.23065842
  0.90920000   2.23065668
  0.90930000   2.23117520
  0.90930000   2.23113760
  0.90930000   2.23115350
  0.90930000   2.23113333
  0.90930000   2.23113871
  0.90930000   2.23112711
  0.90930000   2.23112776
  0.90930000   2.23112047
  0.90930000   2.23111909
  0.90930000   2.23111404
  0.90930000   2.23111189
  0.90930000   2.23110808
  0.90930000   2.23110572
  0.90930000   2.23110263
  0.90930000   2.23110030
  0.90930000   2.23109769
  0.90930000   2.23109548
  0.90930000   2.23109319
  0.90930000   2.23109115
  0.90930000   2.23108911
  0.90930000   2.23108722
  0.90930000   2.23108538
  0.90930000   2.23108365
  0.90940000   2.23160217
  0.90940000   2.23156259
  0.90940000   2.23157995
  0.90940000   2.23155871
  0.90940000   2.23156487
  0.90940000   2.23155269
  0.90940000   2.23155376
  0.90940000   2.23154617
  0.90940000   2.23154501
  0.90940000   2.23153980
  0.90940000   2.23153777
  0.90940000   2.23153387
  0.90940000   2.23153157
  0.90940000   2.23152844
  0.90940000   2.23152614
  0.90940000   2.23152350
  0.90940000   2.23152131
  0.90940000   2.23151901
  0.90940000   2.23151697
  0.90940000   2.23151493
  0.90940000   2.23151305
  0.90940000   2.23151120
  0.90940000   2.23150947
  0.90950000   2.23202801
  0.90950000   2.23198642
  0.90950000   2.23200529
  0.90950000   2.23198292
  0.90950000   2.23198991
  0.90950000   2.23197713
  0.90950000   2.23197864
  0.90950000   2.23197072
  0.90950000   2.23196980
  0.90950000   2.23196442
  0.90950000   2.23196251
  0.90950000   2.23195852
  0.90950000   2.23195628
  0.90950000   2.23195311
  0.90950000   2.23195084
  0.90950000   2.23194818
  0.90950000   2.23194601
  0.90950000   2.23194369
  0.90950000   2.23194167
  0.90950000   2.23193961
  0.90950000   2.23193774
  0.90950000   2.23193589
  0.90950000   2.23193416
  0.90960000   2.23245274
  0.90960000   2.23240910
  0.90960000   2.23242951
  0.90960000   2.23240600
  0.90960000   2.23241384
  0.90960000   2.23240042
  0.90960000   2.23240240
  0.90960000   2.23239413
  0.90960000   2.23239347
  0.90960000   2.23238790
  0.90960000   2.23238613
  0.90960000   2.23238204
  0.90960000   2.23237987
  0.90960000   2.23237665
  0.90960000   2.23237442
  0.90960000   2.23237173
  0.90960000   2.23236957
  0.90960000   2.23236725
  0.90960000   2.23236523
  0.90960000   2.23236316
  0.90960000   2.23236129
  0.90960000   2.23235944
  0.90960000   2.23235771
  0.90970000   2.23287635
  0.90970000   2.23283065
  0.90970000   2.23285261
  0.90970000   2.23282793
  0.90970000   2.23283665
  0.90970000   2.23282258
  0.90970000   2.23282505
  0.90970000   2.23281642
  0.90970000   2.23281602
  0.90970000   2.23281026
  0.90970000   2.23280862
  0.90970000   2.23280443
  0.90970000   2.23280234
  0.90970000   2.23279905
  0.90970000   2.23279687
  0.90970000   2.23279414
  0.90970000   2.23279201
  0.90970000   2.23278967
  0.90970000   2.23278766
  0.90970000   2.23278559
  0.90970000   2.23278373
  0.90970000   2.23278187
  0.90970000   2.23278014
  0.90980000   2.23329883
  0.90980000   2.23325108
  0.90980000   2.23327461
  0.90980000   2.23324873
  0.90980000   2.23325835
  0.90980000   2.23324360
  0.90980000   2.23324658
  0.90980000   2.23323757
  0.90980000   2.23323745
  0.90980000   2.23323148
  0.90980000   2.23323000
  0.90980000   2.23322570
  0.90980000   2.23322369
  0.90980000   2.23322034
  0.90980000   2.23321820
  0.90980000   2.23321544
  0.90980000   2.23321333
  0.90980000   2.23321097
  0.90980000   2.23320898
  0.90980000   2.23320690
  0.90980000   2.23320504
  0.90980000   2.23320317
  0.90980000   2.23320145
  0.90990000   2.23372017
  0.90990000   2.23367039
  0.90990000   2.23369548
  0.90990000   2.23366841
  0.90990000   2.23367894
  0.90990000   2.23366350
  0.90990000   2.23366700
  0.90990000   2.23365760
  0.90990000   2.23365777
  0.90990000   2.23365158
  0.90990000   2.23365027
  0.90990000   2.23364584
  0.90990000   2.23364392
  0.90990000   2.23364051
  0.90990000   2.23363841
  0.90990000   2.23363562
  0.90990000   2.23363354
  0.90990000   2.23363116
  0.90990000   2.23362918
  0.90990000   2.23362709
  0.90990000   2.23362524
  0.90990000   2.23362337
  0.90990000   2.23362165
  0.91000000   2.23414037
  0.91000000   2.23408861
  0.91000000   2.23411524
  0.91000000   2.23408698
  0.91000000   2.23409843
  0.91000000   2.23408229
  0.91000000   2.23408631
  0.91000000   2.23407651
  0.91000000   2.23407699
  0.91000000   2.23407057
  0.91000000   2.23406942
  0.91000000   2.23406487
  0.91000000   2.23406305
  0.91000000   2.23405956
  0.91000000   2.23405752
  0.91000000   2.23405469
  0.91000000   2.23405263
  0.91000000   2.23405023
  0.91000000   2.23404827
  0.91000000   2.23404617
  0.91000000   2.23404432
  0.91000000   2.23404245
  0.91000000   2.23404073
  0.91010000   2.23455941
  0.91010000   2.23450575
  0.91010000   2.23453388
  0.91010000   2.23450445
  0.91010000   2.23451680
  0.91010000   2.23449997
  0.91010000   2.23450452
  0.91010000   2.23449432
  0.91010000   2.23449510
  0.91010000   2.23448845
  0.91010000   2.23448748
  0.91010000   2.23448280
  0.91010000   2.23448107
  0.91010000   2.23447751
  0.91010000   2.23447552
  0.91010000   2.23447265
  0.91010000   2.23447063
  0.91010000   2.23446820
  0.91010000   2.23446625
  0.91010000   2.23446414
  0.91010000   2.23446230
  0.91010000   2.23446042
  0.91010000   2.23445871
  0.91020000   2.23497728
  0.91020000   2.23492184
  0.91020000   2.23495139
  0.91020000   2.23492084
  0.91020000   2.23493407
  0.91020000   2.23491655
  0.91020000   2.23492163
  0.91020000   2.23491102
  0.91020000   2.23491211
  0.91020000   2.23490523
  0.91020000   2.23490443
  0.91020000   2.23489961
  0.91020000   2.23489799
  0.91020000   2.23489436
  0.91020000   2.23489242
  0.91020000   2.23488951
  0.91020000   2.23488752
  0.91020000   2.23488507
  0.91020000   2.23488313
  0.91020000   2.23488101
  0.91020000   2.23487918
  0.91020000   2.23487729
  0.91020000   2.23487559
  0.91030000   2.23539396
  0.91030000   2.23533689
  0.91030000   2.23536777
  0.91030000   2.23533615
  0.91030000   2.23535022
  0.91030000   2.23533205
  0.91030000   2.23533764
  0.91030000   2.23532663
  0.91030000   2.23532803
  0.91030000   2.23532091
  0.91030000   2.23532029
  0.91030000   2.23531534
  0.91030000   2.23531381
  0.91030000   2.23531010
  0.91030000   2.23530823
  0.91030000   2.23530527
  0.91030000   2.23530331
  0.91030000   2.23530084
  0.91030000   2.23529892
  0.91030000   2.23529678
  0.91030000   2.23529496
  0.91030000   2.23529307
  0.91030000   2.23529137
  0.91040000   2.23580943
  0.91040000   2.23575093
  0.91040000   2.23578300
  0.91040000   2.23575041
  0.91040000   2.23576526
  0.91040000   2.23574646
  0.91040000   2.23575255
  0.91040000   2.23574115
  0.91040000   2.23574285
  0.91040000   2.23573550
  0.91040000   2.23573506
  0.91040000   2.23572997
  0.91040000   2.23572855
  0.91040000   2.23572476
  0.91040000   2.23572294
  0.91040000   2.23571994
  0.91040000   2.23571801
  0.91040000   2.23571551
  0.91040000   2.23571362
  0.91040000   2.23571146
  0.91040000   2.23570966
  0.91040000   2.23570775
  0.91040000   2.23570606
  0.91050000   2.23622367
  0.91050000   2.23616398
  0.91050000   2.23619707
  0.91050000   2.23616362
  0.91050000   2.23617918
  0.91050000   2.23615981
  0.91050000   2.23616636
  0.91050000   2.23615460
  0.91050000   2.23615658
  0.91050000   2.23614901
  0.91050000   2.23614874
  0.91050000   2.23614351
  0.91050000   2.23614220
  0.91050000   2.23613833
  0.91050000   2.23613657
  0.91050000   2.23613352
  0.91050000   2.23613163
  0.91050000   2.23612910
  0.91050000   2.23612723
  0.91050000   2.23612506
  0.91050000   2.23612326
  0.91050000   2.23612134
  0.91050000   2.23611966
  0.91060000   2.23663664
  0.91060000   2.23657608
  0.91060000   2.23660997
  0.91060000   2.23657582
  0.91060000   2.23659198
  0.91060000   2.23657211
  0.91060000   2.23657906
  0.91060000   2.23656697
  0.91060000   2.23656922
  0.91060000   2.23656143
  0.91060000   2.23656134
  0.91060000   2.23655598
  0.91060000   2.23655476
  0.91060000   2.23655081
  0.91060000   2.23654912
  0.91060000   2.23654602
  0.91060000   2.23654417
  0.91060000   2.23654161
  0.91060000   2.23653976
  0.91060000   2.23653757
  0.91060000   2.23653579
  0.91060000   2.23653386
  0.91060000   2.23653218
  0.91070000   2.23704832
  0.91070000   2.23698726
  0.91070000   2.23702168
  0.91070000   2.23698702
  0.91070000   2.23700364
  0.91070000   2.23698337
  0.91070000   2.23699066
  0.91070000   2.23697829
  0.91070000   2.23698077
  0.91070000   2.23697279
  0.91070000   2.23697285
  0.91070000   2.23696737
  0.91070000   2.23696625
  0.91070000   2.23696222
  0.91070000   2.23696059
  0.91070000   2.23695744
  0.91070000   2.23695562
  0.91070000   2.23695304
  0.91070000   2.23695121
  0.91070000   2.23694900
  0.91070000   2.23694723
  0.91070000   2.23694530
  0.91070000   2.23694363
  0.91080000   2.23745866
  0.91080000   2.23739756
  0.91080000   2.23743218
  0.91080000   2.23739725
  0.91080000   2.23741416
  0.91080000   2.23739361
  0.91080000   2.23740116
  0.91080000   2.23738856
  0.91080000   2.23739123
  0.91080000   2.23738309
  0.91080000   2.23738328
  0.91080000   2.23737769
  0.91080000   2.23737666
  0.91080000   2.23737256
  0.91080000   2.23737098
  0.91080000   2.23736779
  0.91080000   2.23736601
  0.91080000   2.23736340
  0.91080000   2.23736159
  0.91080000   2.23735936
  0.91080000   2.23735761
  0.91080000   2.23735566
  0.91080000   2.23735400
  0.91090000   2.23786763
  0.91090000   2.23780702
  0.91090000   2.23784144
  0.91090000   2.23780654
  0.91090000   2.23782352
  0.91090000   2.23780284
  0.91090000   2.23781053
  0.91090000   2.23779780
  0.91090000   2.23780060
  0.91090000   2.23779235
  0.91090000   2.23779263
  0.91090000   2.23778696
  0.91090000   2.23778599
  0.91090000   2.23778184
  0.91090000   2.23778031
  0.91090000   2.23777708
  0.91090000   2.23777533
  0.91090000   2.23777269
  0.91090000   2.23777090
  0.91090000   2.23776866
  0.91090000   2.23776691
  0.91090000   2.23776496
  0.91090000   2.23776330
  0.91100000   2.23827518
  0.91100000   2.23821568
  0.91100000   2.23824945
  0.91100000   2.23821491
  0.91100000   2.23823171
  0.91100000   2.23821110
  0.91100000   2.23821879
  0.91100000   2.23820601
  0.91100000   2.23820887
  0.91100000   2.23820056
  0.91100000   2.23820090
  0.91100000   2.23819517
  0.91100000   2.23819426
  0.91100000   2.23819006
  0.91100000   2.23818856
  0.91100000   2.23818531
  0.91100000   2.23818357
  0.91100000   2.23818092
  0.91100000   2.23817914
  0.91100000   2.23817689
  0.91100000   2.23817516
  0.91100000   2.23817319
  0.91100000   2.23817154
  0.91110000   2.23868124
  0.91110000   2.23862360
  0.91110000   2.23865615
  0.91110000   2.23862239
  0.91110000   2.23863870
  0.91110000   2.23861839
  0.91110000   2.23862591
  0.91110000   2.23861323
  0.91110000   2.23861604
  0.91110000   2.23860774
  0.91110000   2.23860809
  0.91110000   2.23860234
  0.91110000   2.23860145
  0.91110000   2.23859723
  0.91110000   2.23859575
  0.91110000   2.23859248
  0.91110000   2.23859076
  0.91110000   2.23858810
  0.91110000   2.23858633
  0.91110000   2.23858407
  0.91110000   2.23858234
  0.91110000   2.23858037
  0.91110000   2.23857872
  0.91120000   2.23908577
  0.91120000   2.23903084
  0.91120000   2.23906152
  0.91120000   2.23902904
  0.91120000   2.23904448
  0.91120000   2.23902476
  0.91120000   2.23903188
  0.91120000   2.23901946
  0.91120000   2.23902210
  0.91120000   2.23901391
  0.91120000   2.23901419
  0.91120000   2.23900849
  0.91120000   2.23900757
  0.91120000   2.23900336
  0.91120000   2.23900188
  0.91120000   2.23899861
  0.91120000   2.23899689
  0.91120000   2.23899422
  0.91120000   2.23899246
  0.91120000   2.23899019
  0.91120000   2.23898847
  0.91120000   2.23898650
  0.91120000   2.23898485
  0.91130000   2.23948869
  0.91130000   2.23943746
  0.91130000   2.23946551
  0.91130000   2.23943489
  0.91130000   2.23944902
  0.91130000   2.23943022
  0.91130000   2.23943670
  0.91130000   2.23942472
  0.91130000   2.23942706
  0.91130000   2.23941907
  0.91130000   2.23941921
  0.91130000   2.23941360
  0.91130000   2.23941262
  0.91130000   2.23940846
  0.91130000   2.23940695
  0.91130000   2.23940369
  0.91130000   2.23940197
  0.91130000   2.23939930
  0.91130000   2.23939753
  0.91130000   2.23939527
  0.91130000   2.23939355
  0.91130000   2.23939157
  0.91130000   2.23938993
  0.91140000   2.23988992
  0.91140000   2.23984353
  0.91140000   2.23986807
  0.91140000   2.23983999
  0.91140000   2.23985228
  0.91140000   2.23983481
  0.91140000   2.23984033
  0.91140000   2.23982904
  0.91140000   2.23983088
  0.91140000   2.23982326
  0.91140000   2.23982314
  0.91140000   2.23981771
  0.91140000   2.23981660
  0.91140000   2.23981253
  0.91140000   2.23981095
  0.91140000   2.23980774
  0.91140000   2.23980599
  0.91140000   2.23980334
  0.91140000   2.23980156
  0.91140000   2.23979931
  0.91140000   2.23979758
  0.91140000   2.23979561
  0.91140000   2.23979396
  0.91150000   2.24028939
  0.91150000   2.24024912
  0.91150000   2.24026915
  0.91150000   2.24024440
  0.91150000   2.24025424
  0.91150000   2.24023856
  0.91150000   2.24024277
  0.91150000   2.24023245
  0.91150000   2.24023358
  0.91150000   2.24022647
  0.91150000   2.24022598
  0.91150000   2.24022082
  0.91150000   2.24021951
  0.91150000   2.24021559
  0.91150000   2.24021390
  0.91150000   2.24021077
  0.91150000   2.24020896
  0.91150000   2.24020635
  0.91150000   2.24020454
  0.91150000   2.24020231
  0.91150000   2.24020056
  0.91150000   2.24019860
  0.91150000   2.24019695
  0.91160000   2.24068698
  0.91160000   2.24065434
  0.91160000   2.24066868
  0.91160000   2.24064817
  0.91160000   2.24065485
  0.91160000   2.24064153
  0.91160000   2.24064398
  0.91160000   2.24063496
  0.91160000   2.24063512
  0.91160000   2.24062874
  0.91160000   2.24062770
  0.91160000   2.24062295
  0.91160000   2.24062134
  0.91160000   2.24061764
  0.91160000   2.24061579
  0.91160000   2.24061278
  0.91160000   2.24061087
  0.91160000   2.24060834
  0.91160000   2.24060647
  0.91160000   2.24060428
  0.91160000   2.24060250
  0.91160000   2.24060057
  0.91160000   2.24059890
  0.91170000   2.24108261
  0.91170000   2.24105926
  0.91170000   2.24106660
  0.91170000   2.24105136
  0.91170000   2.24105407
  0.91170000   2.24104374
  0.91170000   2.24104393
  0.91170000   2.24103662
  0.91170000   2.24103550
  0.91170000   2.24103008
  0.91170000   2.24102832
  0.91170000   2.24102412
  0.91170000   2.24102209
  0.91170000   2.24101870
  0.91170000   2.24101661
  0.91170000   2.24101378
  0.91170000   2.24101174
  0.91170000   2.24100931
  0.91170000   2.24100737
  0.91170000   2.24100523
  0.91170000   2.24100341
  0.91170000   2.24100150
  0.91170000   2.24099981
  0.91180000   2.24147615
  0.91180000   2.24146400
  0.91180000   2.24146282
  0.91180000   2.24145407
  0.91180000   2.24145184
  0.91180000   2.24144527
  0.91180000   2.24144260
  0.91180000   2.24143746
  0.91180000   2.24143468
  0.91180000   2.24143052
  0.91180000   2.24142780
  0.91180000   2.24142433
  0.91180000   2.24142175
  0.91180000   2.24141878
  0.91180000   2.24141638
  0.91180000   2.24141378
  0.91180000   2.24141156
  0.91180000   2.24140927
  0.91180000   2.24140722
  0.91180000   2.24140516
  0.91180000   2.24140328
  0.91180000   2.24140142
  0.91180000   2.24139969
  0.91190000   2.24186747
  0.91190000   2.24186867
  0.91190000   2.24185725
  0.91190000   2.24185636
  0.91190000   2.24184810
  0.91190000   2.24184615
  0.91190000   2.24183994
  0.91190000   2.24183752
  0.91190000   2.24183266
  0.91190000   2.24183010
  0.91190000   2.24182615
  0.91190000   2.24182362
  0.91190000   2.24182032
  0.91190000   2.24181790
  0.91190000   2.24181507
  0.91190000   2.24181280
  0.91190000   2.24181033
  0.91190000   2.24180823
  0.91190000   2.24180603
  0.91190000   2.24180409
  0.91190000   2.24180212
  0.91190000   2.24180033
  0.91190000   2.24179855
  0.91200000   2.24225644
  0.91200000   2.24227341
  0.91200000   2.24224980
  0.91200000   2.24225832
  0.91200000   2.24224279
  0.91200000   2.24224647
  0.91200000   2.24223590
  0.91200000   2.24223685
  0.91200000   2.24222938
  0.91200000   2.24222883
  0.91200000   2.24222333
  0.91200000   2.24222200
  0.91200000   2.24221777
  0.91200000   2.24221607
  0.91200000   2.24221269
  0.91200000   2.24221085
  0.91200000   2.24220804
  0.91200000   2.24220619
  0.91200000   2.24220380
  0.91200000   2.24220201
  0.91200000   2.24219993
  0.91200000   2.24219822
  0.91200000   2.24219637
  0.91210000   2.24264290
  0.91210000   2.24267834
  0.91210000   2.24264035
  0.91210000   2.24266007
  0.91210000   2.24263582
  0.91210000   2.24264628
  0.91210000   2.24263044
  0.91210000   2.24263549
  0.91210000   2.24262483
  0.91210000   2.24262677
  0.91210000   2.24261933
  0.91210000   2.24261950
  0.91210000   2.24261410
  0.91210000   2.24261331
  0.91210000   2.24260922
  0.91210000   2.24260793
  0.91210000   2.24260470
  0.91210000   2.24260319
  0.91210000   2.24260054
  0.91210000   2.24259895
  0.91210000   2.24259670
  0.91210000   2.24259512
  0.91210000   2.24259318
  0.91220000   2.24302668
  0.91220000   2.24308362
  0.91220000   2.24302879
  0.91220000   2.24306170
  0.91220000   2.24302712
  0.91220000   2.24304568
  0.91220000   2.24302349
  0.91220000   2.24303351
  0.91220000   2.24301896
  0.91220000   2.24302394
  0.91220000   2.24301412
  0.91220000   2.24301616
  0.91220000   2.24300930
  0.91220000   2.24300965
  0.91220000   2.24300466
  0.91220000   2.24300408
  0.91220000   2.24300030
  0.91220000   2.24299921
  0.91220000   2.24299622
  0.91220000   2.24299490
  0.91220000   2.24299245
  0.91220000   2.24299103
  0.91220000   2.24298896
  0.91230000   2.24340760
  0.91230000   2.24348942
  0.91230000   2.24341497
  0.91230000   2.24346335
  0.91230000   2.24341658
  0.91230000   2.24344474
  0.91230000   2.24341499
  0.91230000   2.24343097
  0.91230000   2.24341172
  0.91230000   2.24342040
  0.91230000   2.24340767
  0.91230000   2.24341200
  0.91230000   2.24340334
  0.91230000   2.24340511
  0.91230000   2.24339900
  0.91230000   2.24339930
  0.91230000   2.24339482
  0.91230000   2.24339428
  0.91230000   2.24339087
  0.91230000   2.24338988
  0.91230000   2.24338716
  0.91230000   2.24338595
  0.91230000   2.24338371
  0.91240000   2.24378544
  0.91240000   2.24389593
  0.91240000   2.24379876
  0.91240000   2.24386515
  0.91240000   2.24380410
  0.91240000   2.24384357
  0.91240000   2.24380486
  0.91240000   2.24382794
  0.91240000   2.24380307
  0.91240000   2.24381620
  0.91240000   2.24379994
  0.91240000   2.24380707
  0.91240000   2.24379619
  0.91240000   2.24379971
  0.91240000   2.24379222
  0.91240000   2.24379361
  0.91240000   2.24378827
  0.91240000   2.24378841
  0.91240000   2.24378446
  0.91240000   2.24378389
  0.91240000   2.24378084
  0.91240000   2.24377990
  0.91240000   2.24377745
  0.91250000   2.24416000
  0.91250000   2.24430333
  0.91250000   2.24417997
  0.91250000   2.24426724
  0.91250000   2.24418955
  0.91250000   2.24424229
  0.91250000   2.24419301
  0.91250000   2.24422451
  0.91250000   2.24419293
  0.91250000   2.24421140
  0.91250000   2.24419089
  0.91250000   2.24420140
  0.91250000   2.24418783
  0.91250000   2.24419350
  0.91250000   2.24418430
  0.91250000   2.24418704
  0.91250000   2.24418063
  0.91250000   2.24418163
  0.91250000   2.24417699
  0.91250000   2.24417697
  0.91250000   2.24417348
  0.91250000   2.24417288
  0.91250000   2.24417016
  0.91260000   2.24453103
  0.91260000   2.24471186
  0.91260000   2.24455844
  0.91260000   2.24466980
  0.91260000   2.24457281
  0.91260000   2.24464101
  0.91260000   2.24457934
  0.91260000   2.24462076
  0.91260000   2.24458125
  0.91260000   2.24460607
  0.91260000   2.24458048
  0.91260000   2.24459505
  0.91260000   2.24457823
  0.91260000   2.24458649
  0.91260000   2.24457522
  0.91260000   2.24457962
  0.91260000   2.24457188
  0.91260000   2.24457394
  0.91260000   2.24456845
  0.91260000   2.24456911
  0.91260000   2.24456509
  0.91260000   2.24456491
  0.91260000   2.24456185
  0.91270000   2.24489827
  0.91270000   2.24512173
  0.91270000   2.24493396
  0.91270000   2.24507301
  0.91270000   2.24495372
  0.91270000   2.24503987
  0.91270000   2.24496376
  0.91270000   2.24501680
  0.91270000   2.24496793
  0.91270000   2.24500027
  0.91270000   2.24496864
  0.91270000   2.24498807
  0.91270000   2.24496734
  0.91270000   2.24497874
  0.91270000   2.24496495
  0.91270000   2.24497138
  0.91270000   2.24496201
  0.91270000   2.24496537
  0.91270000   2.24495884
  0.91270000   2.24496034
  0.91270000   2.24495564
  0.91270000   2.24495601
  0.91270000   2.24495251
  0.91280000   2.24526144
  0.91280000   2.24553323
  0.91280000   2.24530631
  0.91280000   2.24547705
  0.91280000   2.24533211
  0.91280000   2.24543902
  0.91280000   2.24534612
  0.91280000   2.24541273
  0.91280000   2.24535290
  0.91280000   2.24539411
  0.91280000   2.24535531
  0.91280000   2.24538052
  0.91280000   2.24535513
  0.91280000   2.24537030
  0.91280000   2.24535346
  0.91280000   2.24536234
  0.91280000   2.24535100
  0.91280000   2.24535595
  0.91280000   2.24534814
  0.91280000   2.24535067
  0.91280000   2.24534514
  0.91280000   2.24534618
  0.91280000   2.24534214
  0.91290000   2.24562022
  0.91290000   2.24594661
  0.91290000   2.24567526
  0.91290000   2.24588216
  0.91290000   2.24570781
  0.91290000   2.24583863
  0.91290000   2.24572630
  0.91290000   2.24580870
  0.91290000   2.24573605
  0.91290000   2.24578766
  0.91290000   2.24574042
  0.91290000   2.24577248
  0.91290000   2.24574153
  0.91290000   2.24576121
  0.91290000   2.24574072
  0.91290000   2.24575256
  0.91290000   2.24573881
  0.91290000   2.24574571
  0.91290000   2.24573632
  0.91290000   2.24574013
  0.91290000   2.24573356
  0.91290000   2.24573544
  0.91290000   2.24573072
  0.91300000   2.24597430
  0.91300000   2.24636218
  0.91300000   2.24604054
  0.91300000   2.24628857
  0.91300000   2.24608062
  0.91300000   2.24623889
  0.91300000   2.24610414
  0.91300000   2.24620484
  0.91300000   2.24611726
  0.91300000   2.24618105
  0.91300000   2.24612388
  0.91300000   2.24616403
  0.91300000   2.24612649
  0.91300000   2.24615153
  0.91300000   2.24612667
  0.91300000   2.24614207
  0.91300000   2.24612543
  0.91300000   2.24613469
  0.91300000   2.24612338
  0.91300000   2.24612874
  0.91300000   2.24612091
  0.91300000   2.24612382
  0.91300000   2.24611826
  0.91310000   2.24632331
  0.91310000   2.24678027
  0.91310000   2.24640187
  0.91310000   2.24669653
  0.91310000   2.24645030
  0.91310000   2.24663999
  0.91310000   2.24647947
  0.91310000   2.24660130
  0.91310000   2.24649640
  0.91310000   2.24657438
  0.91310000   2.24650559
  0.91310000   2.24655526
  0.91310000   2.24650993
  0.91310000   2.24654134
  0.91310000   2.24651128
  0.91310000   2.24653093
  0.91310000   2.24651081
  0.91310000   2.24652291
  0.91310000   2.24650928
  0.91310000   2.24651654
  0.91310000   2.24650716
  0.91310000   2.24651133
  0.91310000   2.24650474
  0.91320000   2.24666687
  0.91320000   2.24720124
  0.91320000   2.24675894
  0.91320000   2.24710634
  0.91320000   2.24681661
  0.91320000   2.24704216
  0.91320000   2.24685211
  0.91320000   2.24699826
  0.91320000   2.24687334
  0.91320000   2.24696779
  0.91320000   2.24688545
  0.91320000   2.24694626
  0.91320000   2.24689177
  0.91320000   2.24693071
  0.91320000   2.24689447
  0.91320000   2.24691919
  0.91320000   2.24689491
  0.91320000   2.24691042
  0.91320000   2.24689399
  0.91320000   2.24690355
  0.91320000   2.24689229
  0.91320000   2.24689800
  0.91320000   2.24689015
  0.91330000   2.24700456
  0.91330000   2.24762545
  0.91330000   2.24711140
  0.91330000   2.24751830
  0.91330000   2.24717929
  0.91330000   2.24744565
  0.91330000   2.24722183
  0.91330000   2.24739592
  0.91330000   2.24724790
  0.91330000   2.24736144
  0.91330000   2.24726333
  0.91330000   2.24733716
  0.91330000   2.24727193
  0.91330000   2.24731973
  0.91330000   2.24727617
  0.91330000   2.24730693
  0.91330000   2.24727768
  0.91330000   2.24729729
  0.91330000   2.24727748
  0.91330000   2.24728981
  0.91330000   2.24727627
  0.91330000   2.24728386
  0.91330000   2.24727447
  0.91340000   2.24733594
  0.91340000   2.24805334
  0.91340000   2.24745890
  0.91340000   2.24793274
  0.91340000   2.24753804
  0.91340000   2.24785073
  0.91340000   2.24758840
  0.91340000   2.24779448
  0.91340000   2.24761990
  0.91340000   2.24775549
  0.91340000   2.24763909
  0.91340000   2.24772809
  0.91340000   2.24765029
  0.91340000   2.24770850
  0.91340000   2.24765632
  0.91340000   2.24769422
  0.91340000   2.24765906
  0.91340000   2.24768355
  0.91340000   2.24765971
  0.91340000   2.24767538
  0.91340000   2.24765907
  0.91340000   2.24766894
  0.91340000   2.24765767
  0.91350000   2.24766052
  0.91350000   2.24848532
  0.91350000   2.24780104
  0.91350000   2.24835004
  0.91350000   2.24789254
  0.91350000   2.24825769
  0.91350000   2.24795157
  0.91350000   2.24819419
  0.91350000   2.24798915
  0.91350000   2.24815013
  0.91350000   2.24801258
  0.91350000   2.24811919
  0.91350000   2.24802673
  0.91350000   2.24809714
  0.91350000   2.24803482
  0.91350000   2.24808114
  0.91350000   2.24803898
  0.91350000   2.24806929
  0.91350000   2.24804062
  0.91350000   2.24806030
  0.91350000   2.24804066
  0.91350000   2.24805330
  0.91350000   2.24803973
  0.91360000   2.24797779
  0.91360000   2.24892189
  0.91360000   2.24813738
  0.91360000   2.24877060
  0.91360000   2.24824243
  0.91360000   2.24866687
  0.91360000   2.24831106
  0.91360000   2.24859532
  0.91360000   2.24835541
  0.91360000   2.24854557
  0.91360000   2.24838361
  0.91360000   2.24851063
  0.91360000   2.24840112
  0.91360000   2.24848577
  0.91360000   2.24841156
  0.91360000   2.24846781
  0.91360000   2.24841736
  0.91360000   2.24845458
  0.91360000   2.24842014
  0.91360000   2.24844463
  0.91360000   2.24842099
  0.91360000   2.24843696
  0.91360000   2.24842061
  0.91370000   2.24828721
  0.91370000   2.24936355
  0.91370000   2.24846746
  0.91370000   2.24919483
  0.91370000   2.24858732
  0.91370000   2.24907861
  0.91370000   2.24866653
  0.91370000   2.24899814
  0.91370000   2.24871843
  0.91370000   2.24894204
  0.91370000   2.24875199
  0.91370000   2.24890259
  0.91370000   2.24877329
  0.91370000   2.24887454
  0.91370000   2.24878641
  0.91370000   2.24885433
  0.91370000   2.24879411
  0.91370000   2.24883951
  0.91370000   2.24879823
  0.91370000   2.24882844
  0.91370000   2.24880001
  0.91370000   2.24881998
  0.91370000   2.24880029
  0.91380000   2.24858819
  0.91380000   2.24981084
  0.91380000   2.24879078
  0.91380000   2.24962320
  0.91380000   2.24892680
  0.91380000   2.24949330
  0.91380000   2.24901766
  0.91380000   2.24940297
  0.91380000   2.24907792
  0.91380000   2.24933980
  0.91380000   2.24911749
  0.91380000   2.24929528
  0.91380000   2.24914307
  0.91380000   2.24926362
  0.91380000   2.24915925
  0.91380000   2.24924083
  0.91380000   2.24916912
  0.91380000   2.24922418
  0.91380000   2.24917478
  0.91380000   2.24921181
  0.91380000   2.24917766
  0.91380000   2.24920243
  0.91380000   2.24917871
  0.91390000   2.24888010
  0.91390000   2.25026436
  0.91390000   2.24910679
  0.91390000   2.25005623
  0.91390000   2.24926040
  0.91390000   2.24991138
  0.91390000   2.24936406
  0.91390000   2.24981018
  0.91390000   2.24943359
  0.91390000   2.24973914
  0.91390000   2.24947985
  0.91390000   2.24968894
  0.91390000   2.24951026
  0.91390000   2.24965318
  0.91390000   2.24952991
  0.91390000   2.24962746
  0.91390000   2.24954227
  0.91390000   2.24960870
  0.91390000   2.24954971
  0.91390000   2.24959483
  0.91390000   2.24955386
  0.91390000   2.24958438
  0.91390000   2.24955582
  0.91400000   2.24916227
  0.91400000   2.25072471
  0.91400000   2.24941491
  0.91400000   2.25049444
  0.91400000   2.24958764
  0.91400000   2.25033329
  0.91400000   2.24970531
  0.91400000   2.25022014
  0.91400000   2.24978508
  0.91400000   2.25014037
  0.91400000   2.24983881
  0.91400000   2.25008382
  0.91400000   2.24987464
  0.91400000   2.25004345
  0.91400000   2.24989821
  0.91400000   2.25001438
  0.91400000   2.24991341
  0.91400000   2.24999322
  0.91400000   2.24992290
  0.91400000   2.24997761
  0.91400000   2.24992852
  0.91400000   2.24996591
  0.91400000   2.24993154
  0.91410000   2.24943400
  0.91410000   2.25119257
  0.91410000   2.24971452
  0.91410000   2.25093843
  0.91410000   2.24990796
  0.91410000   2.25075954
  0.91410000   2.25004095
  0.91410000   2.25063328
  0.91410000   2.25013202
  0.91410000   2.25054385
  0.91410000   2.25019404
  0.91410000   2.25048021
  0.91410000   2.25023594
  0.91410000   2.25043465
  0.91410000   2.25026396
  0.91410000   2.25040180
  0.91410000   2.25028239
  0.91410000   2.25037788
  0.91410000   2.25029423
  0.91410000   2.25036026
  0.91410000   2.25030156
  0.91410000   2.25034711
  0.91410000   2.25030581
  0.91420000   2.24969452
  0.91420000   2.25166865
  0.91420000   2.25000495
  0.91420000   2.25138883
  0.91420000   2.25022078
  0.91420000   2.25119069
  0.91420000   2.25037048
  0.91420000   2.25105007
  0.91420000   2.25047398
  0.91420000   2.25094997
  0.91420000   2.25054519
  0.91420000   2.25087844
  0.91420000   2.25059389
  0.91420000   2.25082705
  0.91420000   2.25062691
  0.91420000   2.25078991
  0.91420000   2.25064901
  0.91420000   2.25076285
  0.91420000   2.25066355
  0.91420000   2.25074293
  0.91420000   2.25067284
  0.91420000   2.25072810
  0.91420000   2.25067853
  0.91430000   2.24994304
  0.91430000   2.25215370
  0.91430000   2.25028547
  0.91430000   2.25184630
  0.91430000   2.25052548
  0.91430000   2.25162731
  0.91430000   2.25069337
  0.91430000   2.25147100
  0.91430000   2.25081049
  0.91430000   2.25135916
  0.91430000   2.25089189
  0.91430000   2.25127885
  0.91430000   2.25094817
  0.91430000   2.25122095
  0.91430000   2.25098680
  0.91430000   2.25117898
  0.91430000   2.25101307
  0.91430000   2.25114834
  0.91430000   2.25103068
  0.91430000   2.25112578
  0.91430000   2.25104224
  0.91430000   2.25110901
  0.91430000   2.25104960
  0.91440000   2.25017871
  0.91440000   2.25264852
  0.91440000   2.25055530
  0.91440000   2.25231156
  0.91440000   2.25082136
  0.91440000   2.25207004
  0.91440000   2.25100901
  0.91440000   2.25189664
  0.91440000   2.25114106
  0.91440000   2.25177188
  0.91440000   2.25123369
  0.91440000   2.25168187
  0.91440000   2.25129840
  0.91440000   2.25161668
  0.91440000   2.25134335
  0.91440000   2.25156926
  0.91440000   2.25137432
  0.91440000   2.25153457
  0.91440000   2.25139543
  0.91440000   2.25150899
  0.91440000   2.25140960
  0.91440000   2.25148998
  0.91440000   2.25141888
  0.91450000   2.25040064
  0.91450000   2.25315394
  0.91450000   2.25081365
  0.91450000   2.25278541
  0.91450000   2.25110769
  0.91450000   2.25251958
  0.91450000   2.25131675
  0.91450000   2.25232759
  0.91450000   2.25146512
  0.91450000   2.25218867
  0.91450000   2.25157013
  0.91450000   2.25208792
  0.91450000   2.25164421
  0.91450000   2.25201462
  0.91450000   2.25169621
  0.91450000   2.25196108
  0.91450000   2.25173250
  0.91450000   2.25192179
  0.91450000   2.25175759
  0.91450000   2.25189277
  0.91450000   2.25177473
  0.91450000   2.25187118
  0.91450000   2.25178624
  0.91460000   2.25060787
  0.91460000   2.25367088
  0.91460000   2.25105961
  0.91460000   2.25326865
  0.91460000   2.25138368
  0.91460000   2.25297668
  0.91460000   2.25161590
  0.91460000   2.25276451
  0.91460000   2.25178205
  0.91460000   2.25261010
  0.91460000   2.25190068
  0.91460000   2.25249750
  0.91460000   2.25198513
  0.91460000   2.25241517
  0.91460000   2.25204502
  0.91460000   2.25235478
  0.91460000   2.25208727
  0.91460000   2.25231030
  0.91460000   2.25211688
  0.91460000   2.25227736
  0.91460000   2.25213743
  0.91460000   2.25225282
  0.91460000   2.25215150
  0.91470000   2.25079940
  0.91470000   2.25420028
  0.91470000   2.25129226
  0.91470000   2.25376218
  0.91470000   2.25164846
  0.91470000   2.25344214
  0.91470000   2.25190569
  0.91470000   2.25320812
  0.91470000   2.25209120
  0.91470000   2.25303679
  0.91470000   2.25222474
  0.91470000   2.25291115
  0.91470000   2.25232066
  0.91470000   2.25281880
  0.91470000   2.25238934
  0.91470000   2.25275075
  0.91470000   2.25243830
  0.91470000   2.25270042
  0.91470000   2.25247302
  0.91470000   2.25266303
  0.91470000   2.25249745
  0.91470000   2.25263511
  0.91470000   2.25251447
  0.91480000   2.25097418
  0.91480000   2.25474312
  0.91480000   2.25151059
  0.91480000   2.25426693
  0.91480000   2.25190114
  0.91480000   2.25391681
  0.91480000   2.25218529
  0.91480000   2.25365919
  0.91480000   2.25239181
  0.91480000   2.25346943
  0.91480000   2.25254169
  0.91480000   2.25332947
  0.91480000   2.25265026
  0.91480000   2.25322604
  0.91480000   2.25272871
  0.91480000   2.25314944
  0.91480000   2.25278519
  0.91480000   2.25309253
  0.91480000   2.25282567
  0.91480000   2.25305010
  0.91480000   2.25285452
  0.91480000   2.25301832
  0.91480000   2.25287490
  0.91490000   2.25113111
  0.91490000   2.25530047
  0.91490000   2.25171357
  0.91490000   2.25478391
  0.91490000   2.25214072
  0.91490000   2.25440163
  0.91490000   2.25245380
  0.91490000   2.25411857
  0.91490000   2.25268309
  0.91490000   2.25390878
  0.91490000   2.25285082
  0.91490000   2.25375312
  0.91490000   2.25297332
  0.91490000   2.25363745
  0.91490000   2.25306259
  0.91490000   2.25355133
  0.91490000   2.25312747
  0.91490000   2.25348705
  0.91490000   2.25317445
  0.91490000   2.25343892
  0.91490000   2.25320831
  0.91490000   2.25340275
  0.91490000   2.25323255
  0.91500000   2.25126903
  0.91500000   2.25587341
  0.91500000   2.25190006
  0.91500000   2.25531417
  0.91500000   2.25236614
  0.91500000   2.25489760
  0.91500000   2.25271027
  0.91500000   2.25458716
  0.91500000   2.25296418
  0.91500000   2.25435566
  0.91500000   2.25315135
  0.91500000   2.25418285
  0.91500000   2.25328914
  0.91500000   2.25405369
  0.91500000   2.25339040
  0.91500000   2.25395699
  0.91500000   2.25346465
  0.91500000   2.25388446
  0.91500000   2.25351893
  0.91500000   2.25382990
  0.91500000   2.25355846
  0.91500000   2.25378874
  0.91500000   2.25358710
  0.91510000   2.25138671
  0.91510000   2.25646311
  0.91510000   2.25206888
  0.91510000   2.25585884
  0.91510000   2.25257630
  0.91510000   2.25540578
  0.91510000   2.25295364
  0.91510000   2.25506597
  0.91510000   2.25323411
  0.91510000   2.25481096
  0.91510000   2.25344242
  0.91510000   2.25461943
  0.91510000   2.25359697
  0.91510000   2.25447544
  0.91510000   2.25371147
  0.91510000   2.25436704
  0.91510000   2.25379615
  0.91510000   2.25428528
  0.91510000   2.25385861
  0.91510000   2.25422350
  0.91510000   2.25390455
  0.91510000   2.25417668
  0.91510000   2.25393819
  0.91520000   2.25148289
  0.91520000   2.25707076
  0.91520000   2.25221878
  0.91520000   2.25641910
  0.91520000   2.25276998
  0.91520000   2.25592730
  0.91520000   2.25318280
  0.91520000   2.25555604
  0.91520000   2.25349186
  0.91520000   2.25527565
  0.91520000   2.25372311
  0.91520000   2.25506377
  0.91520000   2.25389599
  0.91520000   2.25490350
  0.91520000   2.25402508
  0.91520000   2.25478215
  0.91520000   2.25412132
  0.91520000   2.25469014
  0.91520000   2.25419294
  0.91520000   2.25462024
  0.91520000   2.25424610
  0.91520000   2.25456702
  0.91520000   2.25428543
  0.91530000   2.25155624
  0.91530000   2.25769763
  0.91530000   2.25234844
  0.91530000   2.25699622
  0.91530000   2.25294592
  0.91530000   2.25646337
  0.91530000   2.25339654
  0.91530000   2.25605852
  0.91530000   2.25373631
  0.91530000   2.25575081
  0.91530000   2.25399240
  0.91530000   2.25551681
  0.91530000   2.25418527
  0.91530000   2.25533875
  0.91530000   2.25433039
  0.91530000   2.25520312
  0.91530000   2.25443946
  0.91530000   2.25509969
  0.91530000   2.25452129
  0.91530000   2.25502071
  0.91530000   2.25458257
  0.91530000   2.25496028
  0.91530000   2.25462833
  0.91540000   2.25160538
  0.91540000   2.25834502
  0.91540000   2.25245648
  0.91540000   2.25759149
  0.91540000   2.25310276
  0.91540000   2.25701529
  0.91540000   2.25359357
  0.91540000   2.25657464
  0.91540000   2.25396626
  0.91540000   2.25623757
  0.91540000   2.25424916
  0.91540000   2.25597962
  0.91540000   2.25446379
  0.91540000   2.25578212
  0.91540000   2.25462651
  0.91540000   2.25563078
  0.91540000   2.25474974
  0.91540000   2.25551471
  0.91540000   2.25484295
  0.91540000   2.25542557
  0.91540000   2.25491334
  0.91540000   2.25535702
  0.91540000   2.25496638
  0.91550000   2.25162887
  0.91550000   2.25901429
  0.91550000   2.25254142
  0.91550000   2.25820632
  0.91550000   2.25323905
  0.91550000   2.25758442
  0.91550000   2.25377250
  0.91550000   2.25710572
  0.91550000   2.25418038
  0.91550000   2.25673717
  0.91550000   2.25449219
  0.91550000   2.25645335
  0.91550000   2.25473046
  0.91550000   2.25623468
  0.91550000   2.25491243
  0.91550000   2.25606610
  0.91550000   2.25505128
  0.91550000   2.25593604
  0.91550000   2.25515713
  0.91550000   2.25583559
  0.91550000   2.25523770
  0.91550000   2.25575792
  0.91550000   2.25529894
  0.91560000   2.25162521
  0.91560000   2.25970685
  0.91560000   2.25260174
  0.91560000   2.25884215
  0.91560000   2.25335329
  0.91560000   2.25817221
  0.91560000   2.25393185
  0.91560000   2.25765316
  0.91560000   2.25437728
  0.91560000   2.25725096
  0.91560000   2.25472017
  0.91560000   2.25693925
  0.91560000   2.25498405
  0.91560000   2.25669758
  0.91560000   2.25518703
  0.91560000   2.25651013
  0.91560000   2.25534307
  0.91560000   2.25636463
  0.91560000   2.25546292
  0.91560000   2.25625161
  0.91560000   2.25555487
  0.91560000   2.25616372
  0.91560000   2.25562533
  0.91570000   2.25159287
  0.91570000   2.26042415
  0.91570000   2.25263585
  0.91570000   2.25950049
  0.91570000   2.25344384
  0.91570000   2.25878019
  0.91570000   2.25407004
  0.91570000   2.25821846
  0.91570000   2.25455543
  0.91570000   2.25778039
  0.91570000   2.25493166
  0.91570000   2.25743869
  0.91570000   2.25522322
  0.91570000   2.25717210
  0.91570000   2.25544909
  0.91570000   2.25696403
  0.91570000   2.25562399
  0.91570000   2.25680154
  0.91570000   2.25575932
  0.91570000   2.25667457
  0.91570000   2.25586394
  0.91570000   2.25657528
  0.91570000   2.25594474
  0.91580000   2.25153025
  0.91580000   2.26116767
  0.91580000   2.25264206
  0.91580000   2.26018293
  0.91580000   2.25350903
  0.91580000   2.25940996
  0.91580000   2.25418540
  0.91580000   2.25880323
  0.91580000   2.25471321
  0.91580000   2.25832700
  0.91580000   2.25512510
  0.91580000   2.25795315
  0.91580000   2.25544651
  0.91580000   2.25765962
  0.91580000   2.25569725
  0.91580000   2.25742909
  0.91580000   2.25589279
  0.91580000   2.25724795
  0.91580000   2.25604519
  0.91580000   2.25710556
  0.91580000   2.25616389
  0.91580000   2.25699355
  0.91580000   2.25625626
  0.91590000   2.25143570
  0.91590000   2.26193896
  0.91590000   2.25261864
  0.91590000   2.26089111
  0.91590000   2.25354706
  0.91590000   2.26006322
  0.91590000   2.25427613
  0.91590000   2.25940917
  0.91590000   2.25484886
  0.91590000   2.25889246
  0.91590000   2.25529883
  0.91590000   2.25848423
  0.91590000   2.25565234
  0.91590000   2.25816166
  0.91590000   2.25593003
  0.91590000   2.25790673
  0.91590000   2.25614810
  0.91590000   2.25770518
  0.91590000   2.25631928
  0.91590000   2.25754578
  0.91590000   2.25645358
  0.91590000   2.25741963
  0.91590000   2.25655888
  0.91600000   2.25130754
  0.91600000   2.26273958
  0.91600000   2.25256377
  0.91600000   2.26162671
  0.91600000   2.25355605
  0.91600000   2.26074175
  0.91600000   2.25434035
  0.91600000   2.26003807
  0.91600000   2.25496051
  0.91600000   2.25947856
  0.91600000   2.25545100
  0.91600000   2.25903366
  0.91600000   2.25583896
  0.91600000   2.25867988
  0.91600000   2.25614578
  0.91600000   2.25839850
  0.91600000   2.25638840
  0.91600000   2.25817467
  0.91600000   2.25658019
  0.91600000   2.25799655
  0.91600000   2.25673173
  0.91600000   2.25785474
  0.91600000   2.25685140
  0.91610000   2.25114403
  0.91610000   2.26357113
  0.91610000   2.25247558
  0.91610000   2.26239151
  0.91610000   2.25353403
  0.91610000   2.26144741
  0.91610000   2.25437603
  0.91610000   2.26069184
  0.91610000   2.25504617
  0.91610000   2.26008719
  0.91610000   2.25557969
  0.91610000   2.25960331
  0.91610000   2.25600448
  0.91610000   2.25921607
  0.91610000   2.25634272
  0.91610000   2.25890613
  0.91610000   2.25661200
  0.91610000   2.25865803
  0.91610000   2.25682633
  0.91610000   2.25845937
  0.91610000   2.25699688
  0.91610000   2.25830025
  0.91610000   2.25713253
  0.91620000   2.25094341
  0.91620000   2.26443522
  0.91620000   2.25235214
  0.91620000   2.26318731
  0.91620000   2.25347896
  0.91620000   2.26218212
  0.91620000   2.25438108
  0.91620000   2.26137248
  0.91620000   2.25510371
  0.91620000   2.26072038
  0.91620000   2.25568277
  0.91620000   2.26019518
  0.91620000   2.25614688
  0.91620000   2.25977219
  0.91620000   2.25651888
  0.91620000   2.25943149
  0.91620000   2.25681704
  0.91620000   2.25915703
  0.91620000   2.25705598
  0.91620000   2.25893591
  0.91620000   2.25724743
  0.91620000   2.25875771
  0.91620000   2.25740076
  0.91630000   2.25070388
  0.91630000   2.26533350
  0.91630000   2.25219143
  0.91630000   2.26401595
  0.91630000   2.25338870
  0.91630000   2.26294789
  0.91630000   2.25435326
  0.91630000   2.26208210
  0.91630000   2.25513086
  0.91630000   2.26138029
  0.91630000   2.25575800
  0.91630000   2.26081143
  0.91630000   2.25626393
  0.91630000   2.26035034
  0.91630000   2.25667213
  0.91630000   2.25997660
  0.91630000   2.25700148
  0.91630000   2.25967364
  0.91630000   2.25726720
  0.91630000   2.25942801
  0.91630000   2.25748155
  0.91630000   2.25922884
  0.91630000   2.25765442
  0.91640000   2.25042360
  0.91640000   2.26626762
  0.91640000   2.25199140
  0.91640000   2.26487934
  0.91640000   2.25326101
  0.91640000   2.26374680
  0.91640000   2.25429024
  0.91640000   2.26282289
  0.91640000   2.25512522
  0.91640000   2.26206918
  0.91640000   2.25580296
  0.91640000   2.26145435
  0.91640000   2.25635325
  0.91640000   2.26095282
  0.91640000   2.25680013
  0.91640000   2.26054371
  0.91640000   2.25716308
  0.91640000   2.26020999
  0.91640000   2.25745786
  0.91640000   2.25993772
  0.91640000   2.25769725
  0.91640000   2.25971558
  0.91640000   2.25789162
  0.91650000   2.25010072
  0.91650000   2.26723923
  0.91650000   2.25174995
  0.91650000   2.26577938
  0.91650000   2.25309360
  0.91650000   2.26458099
  0.91650000   2.25418957
  0.91650000   2.26359715
  0.91650000   2.25508427
  0.91650000   2.26278945
  0.91650000   2.25581508
  0.91650000   2.26212638
  0.91650000   2.25641226
  0.91650000   2.26158206
  0.91650000   2.25690037
  0.91650000   2.26113523
  0.91650000   2.25729939
  0.91650000   2.26076843
  0.91650000   2.25762559
  0.91650000   2.26046730
  0.91650000   2.25789226
  0.91650000   2.26022007
  0.91650000   2.25811023
  0.91660000   2.24973338
  0.91660000   2.26824996
  0.91660000   2.25146493
  0.91660000   2.26671804
  0.91660000   2.25288408
  0.91660000   2.26545264
  0.91660000   2.25404870
  0.91660000   2.26440726
  0.91660000   2.25500532
  0.91660000   2.26354362
  0.91660000   2.25579162
  0.91660000   2.26283012
  0.91660000   2.25643823
  0.91660000   2.26224070
  0.91660000   2.25697011
  0.91660000   2.26175377
  0.91660000   2.25740772
  0.91660000   2.26135153
  0.91660000   2.25776781
  0.91660000   2.26101923
  0.91660000   2.25806410
  0.91660000   2.26074470
  0.91660000   2.25830790
  0.91670000   2.24931970
  0.91670000   2.26930145
  0.91670000   2.25113415
  0.91670000   2.26769726
  0.91670000   2.25263000
  0.91670000   2.26636400
  0.91670000   2.25386496
  0.91670000   2.26525570
  0.91670000   2.25488558
  0.91670000   2.26433432
  0.91670000   2.25572969
  0.91670000   2.26356833
  0.91670000   2.25642818
  0.91670000   2.26293153
  0.91670000   2.25700639
  0.91670000   2.26240215
  0.91670000   2.25748516
  0.91670000   2.26196208
  0.91670000   2.25788165
  0.91670000   2.26159625
  0.91670000   2.25821002
  0.91670000   2.26129212
  0.91670000   2.25848199
  0.91680000   2.24885782
  0.91680000   2.27039528
  0.91680000   2.25075539
  0.91680000   2.26871900
  0.91680000   2.25232887
  0.91680000   2.26731734
  0.91680000   2.25363562
  0.91680000   2.26614499
  0.91680000   2.25472210
  0.91680000   2.26516429
  0.91680000   2.25562619
  0.91680000   2.26434388
  0.91680000   2.25637897
  0.91680000   2.26365755
  0.91680000   2.25700603
  0.91680000   2.26308340
  0.91680000   2.25752853
  0.91680000   2.26260311
  0.91680000   2.25796400
  0.91680000   2.26220134
  0.91680000   2.25832697
  0.91680000   2.26186525
  0.91680000   2.25862954
  0.91690000   2.24834586
  0.91690000   2.27153303
  0.91690000   2.25032644
  0.91690000   2.26978520
  0.91690000   2.25197811
  0.91690000   2.26831496
  0.91690000   2.25335783
  0.91690000   2.26707774
  0.91690000   2.25451182
  0.91690000   2.26603639
  0.91690000   2.25547791
  0.91690000   2.26515981
  0.91690000   2.25628725
  0.91690000   2.26442192
  0.91690000   2.25696561
  0.91690000   2.26380077
  0.91690000   2.25753440
  0.91690000   2.26327790
  0.91690000   2.25801144
  0.91690000   2.26283778
  0.91690000   2.25841160
  0.91690000   2.26246730
  0.91690000   2.25874730
  0.91700000   2.24778200
  0.91700000   2.27271617
  0.91700000   2.24984504
  0.91700000   2.27089780
  0.91700000   2.25157512
  0.91700000   2.26935917
  0.91700000   2.25302866
  0.91700000   2.26805659
  0.91700000   2.25425155
  0.91700000   2.26695354
  0.91700000   2.25528144
  0.91700000   2.26601930
  0.91700000   2.25614947
  0.91700000   2.26522799
  0.91700000   2.25688149
  0.91700000   2.26455772
  0.91700000   2.25749907
  0.91700000   2.26398998
  0.91700000   2.25802027
  0.91700000   2.26350910
  0.91700000   2.25846022
  0.91700000   2.26310179
  0.91700000   2.25883165
  0.91710000   2.24716441
  0.91710000   2.27394616
  0.91710000   2.24930897
  0.91710000   2.27205865
  0.91710000   2.25111728
  0.91710000   2.27045224
  0.91710000   2.25264514
  0.91710000   2.26908422
  0.91710000   2.25393800
  0.91710000   2.26791875
  0.91710000   2.25503324
  0.91710000   2.26692562
  0.91710000   2.25596188
  0.91710000   2.26607925
  0.91710000   2.25674976
  0.91710000   2.26535791
  0.91710000   2.25741855
  0.91710000   2.26474311
  0.91710000   2.25798646
  0.91710000   2.26421914
  0.91710000   2.25846883
  0.91710000   2.26377257
  0.91710000   2.25887862
  0.91720000   2.24649135
  0.91720000   2.27522434
  0.91720000   2.24871601
  0.91720000   2.27326958
  0.91720000   2.25060194
  0.91720000   2.27159646
  0.91720000   2.25220422
  0.91720000   2.27016330
  0.91720000   2.25356777
  0.91720000   2.26893508
  0.91720000   2.25472962
  0.91720000   2.26788216
  0.91720000   2.25572054
  0.91720000   2.26697937
  0.91720000   2.25656631
  0.91720000   2.26620522
  0.91720000   2.25728859
  0.91720000   2.26554134
  0.91720000   2.25790566
  0.91720000   2.26497204
  0.91720000   2.25843303
  0.91720000   2.26448383
  0.91720000   2.25888383
  0.91730000   2.24576111
  0.91730000   2.27655197
  0.91730000   2.24806398
  0.91730000   2.27453232
  0.91730000   2.25002645
  0.91730000   2.27279404
  0.91730000   2.25170283
  0.91730000   2.27129652
  0.91730000   2.25313740
  0.91730000   2.27000563
  0.91730000   2.25436674
  0.91730000   2.26889240
  0.91730000   2.25542134
  0.91730000   2.26793215
  0.91730000   2.25632677
  0.91730000   2.26710371
  0.91730000   2.25710463
  0.91730000   2.26638894
  0.91730000   2.25777320
  0.91730000   2.26577222
  0.91730000   2.25834806
  0.91730000   2.26524009
  0.91730000   2.25884250
  0.91740000   2.24497205
  0.91740000   2.27793020
  0.91740000   2.24735075
  0.91740000   2.27584853
  0.91740000   2.24938821
  0.91740000   2.27404712
  0.91740000   2.25113787
  0.91740000   2.27248652
  0.91740000   2.25264335
  0.91740000   2.27113351
  0.91740000   2.25394069
  0.91740000   2.26995988
  0.91740000   2.25505999
  0.91740000   2.26894150
  0.91740000   2.25602656
  0.91740000   2.26805763
  0.91740000   2.25686184
  0.91740000   2.26729042
  0.91740000   2.25758407
  0.91740000   2.26662441
  0.91740000   2.25820880
  0.91740000   2.26604623
  0.91740000   2.25874939
  0.91750000   2.24412261
  0.91750000   2.27936005
  0.91750000   2.24657427
  0.91750000   2.27721973
  0.91750000   2.24868463
  0.91750000   2.27535776
  0.91750000   2.25050626
  0.91750000   2.27373587
  0.91750000   2.25208205
  0.91750000   2.27232180
  0.91750000   2.25344744
  0.91750000   2.27108815
  0.91750000   2.25463206
  0.91750000   2.27001141
  0.91750000   2.25566090
  0.91750000   2.26907136
  0.91750000   2.25655516
  0.91750000   2.26825049
  0.91750000   2.25733292
  0.91750000   2.26753359
  0.91750000   2.25800970
  0.91750000   2.26690746
  0.91750000   2.25859885
  0.91760000   2.24321135
  0.91760000   2.28084240
  0.91760000   2.24573255
  0.91760000   2.27864729
  0.91760000   2.24791320
  0.91760000   2.27672789
  0.91760000   2.24980495
  0.91760000   2.27504705
  0.91760000   2.25144991
  0.91760000   2.27357354
  0.91760000   2.25288289
  0.91760000   2.27228077
  0.91760000   2.25413300
  0.91760000   2.27114596
  0.91760000   2.25522481
  0.91760000   2.27014941
  0.91760000   2.25617922
  0.91760000   2.26927406
  0.91760000   2.25701411
  0.91760000   2.26850502
  0.91760000   2.25774487
  0.91760000   2.26782930
  0.91760000   2.25838478
  0.91770000   2.24223692
  0.91770000   2.28237797
  0.91770000   2.24482373
  0.91770000   2.28013246
  0.91770000   2.24707148
  0.91770000   2.27815927
  0.91770000   2.24903093
  0.91770000   2.27642242
  0.91770000   2.25074337
  0.91770000   2.27489165
  0.91770000   2.25224294
  0.91770000   2.27354126
  0.91770000   2.25355817
  0.91770000   2.27234919
  0.91770000   2.25471317
  0.91770000   2.27129636
  0.91770000   2.25572848
  0.91770000   2.27036618
  0.91770000   2.25662170
  0.91770000   2.26954416
  0.91770000   2.25740803
  0.91770000   2.26881760
  0.91770000   2.25810062
  0.91780000   2.24119810
  0.91780000   2.28396730
  0.91780000   2.24384607
  0.91780000   2.28167628
  0.91780000   2.24615718
  0.91780000   2.27965353
  0.91780000   2.24818129
  0.91780000   2.27786416
  0.91780000   2.24995892
  0.91780000   2.27627894
  0.91780000   2.25152347
  0.91780000   2.27487303
  0.91780000   2.25290287
  0.91780000   2.27362513
  0.91780000   2.25412074
  0.91780000   2.27251681
  0.91780000   2.25519717
  0.91780000   2.27153200
  0.91780000   2.25614947
  0.91780000   2.27065666
  0.91780000   2.25699256
  0.91780000   2.26987844
  0.91780000   2.25773940
  0.91790000   2.24009384
  0.91790000   2.28561076
  0.91790000   2.24279796
  0.91790000   2.28327958
  0.91790000   2.24516811
  0.91790000   2.28121203
  0.91790000   2.24725326
  0.91790000   2.27937427
  0.91790000   2.24909314
  0.91790000   2.27773804
  0.91790000   2.25072042
  0.91790000   2.27627937
  0.91790000   2.25216243
  0.91790000   2.27497772
  0.91790000   2.25344221
  0.91790000   2.27381532
  0.91790000   2.25457943
  0.91790000   2.27277670
  0.91790000   2.25559099
  0.91790000   2.27184829
  0.91790000   2.25649152
  0.91790000   2.27101814
  0.91790000   2.25729374
  0.91800000   2.23892320
  0.91800000   2.28730851
  0.91800000   2.24167799
  0.91800000   2.28494299
  0.91800000   2.24410227
  0.91800000   2.28283593
  0.91800000   2.24624422
  0.91800000   2.28095449
  0.91800000   2.24814274
  0.91800000   2.27927133
  0.91800000   2.24982984
  0.91800000   2.27776333
  0.91800000   2.25133218
  0.91800000   2.27641070
  0.91800000   2.25267226
  0.91800000   2.27519637
  0.91800000   2.25386926
  0.91800000   2.27410544
  0.91800000   2.25493965
  0.91800000   2.27312486
  0.91800000   2.25589773
  0.91800000   2.27224311
  0.91800000   2.25675593
  0.91810000   2.23768546
  0.91810000   2.28906048
  0.91810000   2.24048491
  0.91810000   2.28666687
  0.91810000   2.24295787
  0.91810000   2.28452611
  0.91810000   2.24515172
  0.91810000   2.28260630
  0.91810000   2.24710464
  0.91810000   2.28088094
  0.91810000   2.24884792
  0.91810000   2.27932773
  0.91810000   2.25040761
  0.91810000   2.27792764
  0.91810000   2.25180564
  0.91810000   2.27666424
  0.91810000   2.25306068
  0.91810000   2.27552324
  0.91810000   2.25418878
  0.91810000   2.27449213
  0.91810000   2.25520383
  0.91810000   2.27355983
  0.91810000   2.25611796
  0.91820000   2.23638005
  0.91820000   2.29086641
  0.91820000   2.23921770
  0.91820000   2.28845134
  0.91820000   2.24173333
  0.91820000   2.28628316
  0.91820000   2.24397359
  0.91820000   2.28433082
  0.91820000   2.24597595
  0.91820000   2.28256863
  0.91820000   2.24777107
  0.91820000   2.28097505
  0.91820000   2.24938437
  0.91820000   2.27953173
  0.91820000   2.25083722
  0.91820000   2.27822292
  0.91820000   2.25214778
  0.91820000   2.27703490
  0.91820000   2.25333166
  0.91820000   2.27595570
  0.91820000   2.25440234
  0.91820000   2.27497471
  0.91820000   2.25537161
  0.91830000   2.23500661
  0.91830000   2.29272578
  0.91830000   2.23787556
  0.91830000   2.29029620
  0.91830000   2.24042734
  0.91830000   2.28810732
  0.91830000   2.24270791
  0.91830000   2.28612884
  0.91830000   2.24475411
  0.91830000   2.28433581
  0.91830000   2.24659598
  0.91830000   2.28270736
  0.91830000   2.24825836
  0.91830000   2.28122583
  0.91830000   2.24976208
  0.91830000   2.27987605
  0.91830000   2.25112481
  0.91830000   2.27864490
  0.91830000   2.25236170
  0.91830000   2.27752090
  0.91830000   2.25348583
  0.91830000   2.27649395
  0.91830000   2.25450861
  0.91840000   2.23356500
  0.91840000   2.29463782
  0.91840000   2.23645796
  0.91840000   2.29220099
  0.91840000   2.23903886
  0.91840000   2.28999851
  0.91840000   2.24135308
  0.91840000   2.28800075
  0.91840000   2.24343687
  0.91840000   2.28618342
  0.91840000   2.24531968
  0.91840000   2.28452628
  0.91840000   2.24702583
  0.91840000   2.28301226
  0.91840000   2.24857564
  0.91840000   2.28162678
  0.91840000   2.24998631
  0.91840000   2.28035723
  0.91840000   2.25127253
  0.91840000   2.27919265
  0.91840000   2.25244700
  0.91840000   2.27812339
  0.91840000   2.25352074
  0.91850000   2.23205528
  0.91850000   2.29660155
  0.91850000   2.23496462
  0.91850000   2.29416493
  0.91850000   2.23756720
  0.91850000   2.29195625
  0.91850000   2.23990787
  0.91850000   2.28994649
  0.91850000   2.24202236
  0.91850000   2.28811192
  0.91850000   2.24393962
  0.91850000   2.28643287
  0.91850000   2.24568347
  0.91850000   2.28489281
  0.91850000   2.24727374
  0.91850000   2.28347766
  0.91850000   2.24872721
  0.91850000   2.28217532
  0.91850000   2.25005815
  0.91850000   2.28097527
  0.91850000   2.25127885
  0.91850000   2.27986831
  0.91850000   2.25240000
  0.91860000   2.23047777
  0.91860000   2.29861570
  0.91860000   2.23339555
  0.91860000   2.29618690
  0.91860000   2.23601198
  0.91860000   2.29397968
  0.91860000   2.23837144
  0.91860000   2.29196553
  0.91860000   2.24050920
  0.91860000   2.29012123
  0.91860000   2.24245375
  0.91860000   2.28842760
  0.91860000   2.24422846
  0.91860000   2.28686858
  0.91860000   2.24585276
  0.91860000   2.28543055
  0.91860000   2.24734299
  0.91860000   2.28410184
  0.91860000   2.24871306
  0.91860000   2.28287236
  0.91860000   2.24997490
  0.91860000   2.28173329
  0.91860000   2.25113885
  0.91870000   2.22883301
  0.91870000   2.30067878
  0.91870000   2.23175106
  0.91870000   2.29826547
  0.91870000   2.23437320
  0.91870000   2.29606753
  0.91870000   2.23674339
  0.91870000   2.29405686
  0.91870000   2.23889648
  0.91870000   2.29221070
  0.91870000   2.24086056
  0.91870000   2.29051028
  0.91870000   2.24265862
  0.91870000   2.28893995
  0.91870000   2.24430971
  0.91870000   2.28748648
  0.91870000   2.24582981
  0.91870000   2.28613860
  0.91870000   2.24723249
  0.91870000   2.28488657
  0.91870000   2.24852934
  0.91870000   2.28372194
  0.91870000   2.24973039
  0.91880000   2.22712176
  0.91880000   2.30278904
  0.91880000   2.23003179
  0.91880000   2.30039890
  0.91880000   2.23265126
  0.91880000   2.29821811
  0.91880000   2.23502377
  0.91880000   2.29621897
  0.91880000   2.23718383
  0.91880000   2.29437906
  0.91880000   2.23915917
  0.91880000   2.29268000
  0.91880000   2.24097245
  0.91880000   2.29110647
  0.91880000   2.24264239
  0.91880000   2.28964559
  0.91880000   2.24418466
  0.91880000   2.28828640
  0.91880000   2.24561251
  0.91880000   2.28701950
  0.91880000   2.24693726
  0.91880000   2.28583674
  0.91880000   2.24816864
  0.91890000   2.22534507
  0.91890000   2.30494448
  0.91890000   2.22823867
  0.91890000   2.30258510
  0.91890000   2.23084693
  0.91890000   2.30042933
  0.91890000   2.23321313
  0.91890000   2.29844979
  0.91890000   2.23537147
  0.91890000   2.29662441
  0.91890000   2.23734939
  0.91890000   2.29493509
  0.91890000   2.23916924
  0.91890000   2.29336681
  0.91890000   2.24084947
  0.91890000   2.29190698
  0.91890000   2.24240548
  0.91890000   2.29054492
  0.91890000   2.24385026
  0.91890000   2.28927149
  0.91890000   2.24519486
  0.91890000   2.28807880
  0.91890000   2.24644878
  0.91900000   2.22350422
  0.91900000   2.30714289
  0.91900000   2.22637298
  0.91900000   2.30482169
  0.91900000   2.22896142
  0.91900000   2.30269867
  0.91900000   2.23131254
  0.91900000   2.30074677
  0.91900000   2.23346026
  0.91900000   2.29894419
  0.91900000   2.23543176
  0.91900000   2.29727309
  0.91900000   2.23724914
  0.91900000   2.29571871
  0.91900000   2.23893060
  0.91900000   2.29426870
  0.91900000   2.24049132
  0.91900000   2.29291260
  0.91900000   2.24194407
  0.91900000   2.29164149
  0.91900000   2.24329968
  0.91900000   2.29044769
  0.91900000   2.24456744
  0.91910000   2.22160071
  0.91910000   2.30938183
  0.91910000   2.22443631
  0.91910000   2.30710595
  0.91910000   2.22699636
  0.91910000   2.30502321
  0.91910000   2.22932359
  0.91910000   2.30310682
  0.91910000   2.23145169
  0.91910000   2.30133520
  0.91910000   2.23340760
  0.91910000   2.29969077
  0.91910000   2.23521320
  0.91910000   2.29815897
  0.91910000   2.23688650
  0.91910000   2.29672765
  0.91910000   2.23844246
  0.91910000   2.29538654
  0.91910000   2.23989367
  0.91910000   2.29412692
  0.91910000   2.24125079
  0.91910000   2.29294128
  0.91910000   2.24252294
  0.91920000   2.21963631
  0.91920000   2.31165866
  0.91920000   2.22243058
  0.91920000   2.30943492
  0.91920000   2.22495378
  0.91920000   2.30739967
  0.91920000   2.22724841
  0.91920000   2.30552634
  0.91920000   2.22934791
  0.91920000   2.30379362
  0.91920000   2.23127903
  0.91920000   2.30218409
  0.91920000   2.23306346
  0.91920000   2.30068341
  0.91920000   2.23471901
  0.91920000   2.29927959
  0.91920000   2.23626048
  0.91920000   2.29796254
  0.91920000   2.23770031
  0.91920000   2.29672367
  0.91920000   2.23904899
  0.91920000   2.29555563
  0.91920000   2.24031551
  0.91930000   2.21761302
  0.91930000   2.31397054
  0.91930000   2.22035802
  0.91930000   2.31180535
  0.91930000   2.22283614
  0.91930000   2.30982437
  0.91930000   2.22508964
  0.91930000   2.30800129
  0.91930000   2.22715174
  0.91930000   2.30631499
  0.91930000   2.22904899
  0.91930000   2.30474826
  0.91930000   2.23080291
  0.91930000   2.30328692
  0.91930000   2.23243115
  0.91930000   2.30191915
  0.91930000   2.23394835
  0.91930000   2.30063499
  0.91930000   2.23536681
  0.91930000   2.29942600
  0.91930000   2.23669690
  0.91930000   2.29828493
  0.91930000   2.23794747
  0.91940000   2.21553304
  0.91940000   2.31631448
  0.91940000   2.21822117
  0.91940000   2.31421377
  0.91940000   2.22064630
  0.91940000   2.31229335
  0.91940000   2.22285046
  0.91940000   2.31052718
  0.91940000   2.22486665
  0.91940000   2.30889432
  0.91940000   2.22672124
  0.91940000   2.30737778
  0.91940000   2.22843557
  0.91940000   2.30596351
  0.91940000   2.23002713
  0.91940000   2.30463986
  0.91940000   2.23151045
  0.91940000   2.30339700
  0.91940000   2.23289767
  0.91940000   2.30222659
  0.91940000   2.23419906
  0.91940000   2.30112152
  0.91940000   2.23542338
  0.91950000   2.21339880
  0.91950000   2.31868734
  0.91950000   2.21602286
  0.91950000   2.31665647
  0.91950000   2.21838751
  0.91950000   2.31480234
  0.91950000   2.22053454
  0.91950000   2.31309912
  0.91950000   2.22249675
  0.91950000   2.31152612
  0.91950000   2.22430030
  0.91950000   2.31006649
  0.91950000   2.22596638
  0.91950000   2.30870638
  0.91950000   2.22751234
  0.91950000   2.30743426
  0.91950000   2.22895255
  0.91950000   2.30624043
  0.91950000   2.23029905
  0.91950000   2.30511668
  0.91950000   2.23156199
  0.91950000   2.30405600
  0.91950000   2.23275002
  0.91960000   2.21121294
  0.91960000   2.32108587
  0.91960000   2.21376619
  0.91960000   2.31912961
  0.91960000   2.21606336
  0.91960000   2.31734682
  0.91960000   2.21814601
  0.91960000   2.31571192
  0.91960000   2.22004672
  0.91960000   2.31420443
  0.91960000   2.22179146
  0.91960000   2.31280769
  0.91960000   2.22340124
  0.91960000   2.31150801
  0.91960000   2.22489326
  0.91960000   2.31029400
  0.91960000   2.22628177
  0.91960000   2.30915609
  0.91960000   2.22757869
  0.91960000   2.30808618
  0.91960000   2.22879405
  0.91960000   2.30707735
  0.91960000   2.22993642
  0.91970000   2.20897824
  0.91970000   2.32350672
  0.91970000   2.21145448
  0.91970000   2.32162918
  0.91970000   2.21367778
  0.91970000   2.31992209
  0.91970000   2.21568943
  0.91970000   2.31836011
  0.91970000   2.21752179
  0.91970000   2.31692297
  0.91970000   2.21920065
  0.91970000   2.31559421
  0.91970000   2.22074684
  0.91970000   2.31436030
  0.91970000   2.22217741
  0.91970000   2.31320999
  0.91970000   2.22350646
  0.91970000   2.31213384
  0.91970000   2.22474580
  0.91970000   2.31112386
  0.91970000   2.22590537
  0.91970000   2.31017325
  0.91970000   2.22699361
  0.91980000   2.20669767
  0.91980000   2.32594648
  0.91980000   2.20909131
  0.91980000   2.32415110
  0.91980000   2.21123499
  0.91980000   2.32252330
  0.91980000   2.21316974
  0.91980000   2.32103802
  0.91980000   2.21492770
  0.91980000   2.31967520
  0.91980000   2.21653445
  0.91980000   2.31841855
  0.91980000   2.21801065
  0.91980000   2.31725472
  0.91980000   2.21937320
  0.91980000   2.31617259
  0.91980000   2.22063606
  0.91980000   2.31516288
  0.91980000   2.22181092
  0.91980000   2.31421770
  0.91980000   2.22290761
  0.91980000   2.31333034
  0.91980000   2.22393448
  0.91990000   2.20437432
  0.91990000   2.32840171
  0.91990000   2.20668042
  0.91990000   2.32669121
  0.91990000   2.20873945
  0.91990000   2.32514554
  0.91990000   2.21059219
  0.91990000   2.32373988
  0.91990000   2.21227055
  0.91990000   2.32245439
  0.91990000   2.21379990
  0.91990000   2.32127297
  0.91990000   2.21520074
  0.91990000   2.32018244
  0.91990000   2.21648979
  0.91990000   2.31917183
  0.91990000   2.21768091
  0.91990000   2.31823197
  0.91990000   2.21878563
  0.91990000   2.31735509
  0.91990000   2.21981370
  0.91990000   2.31653458
  0.91990000   2.22077335
  0.92000000   2.20201142
  0.92000000   2.33086895
  0.92000000   2.20422571
  0.92000000   2.32924535
  0.92000000   2.20619583
  0.92000000   2.32778384
  0.92000000   2.20796230
  0.92000000   2.32645985
  0.92000000   2.20955678
  0.92000000   2.32525376
  0.92000000   2.21100447
  0.92000000   2.32414966
  0.92000000   2.21232565
  0.92000000   2.32313453
  0.92000000   2.21353694
  0.92000000   2.32219754
  0.92000000   2.21465202
  0.92000000   2.32132965
  0.92000000   2.21568233
  0.92000000   2.32052320
  0.92000000   2.21663750
  0.92000000   2.31977168
  0.92000000   2.21752568
  0.92010000   2.19961226
  0.92010000   2.33334477
  0.92010000   2.20173120
  0.92010000   2.33180936
  0.92010000   2.20360896
  0.92010000   2.33043326
  0.92010000   2.20528577
  0.92010000   2.32919213
  0.92010000   2.20679309
  0.92010000   2.32806656
  0.92010000   2.20815588
  0.92010000   2.32704085
  0.92010000   2.20939429
  0.92010000   2.32610211
  0.92010000   2.21052477
  0.92010000   2.32523966
  0.92010000   2.21156087
  0.92010000   2.32444457
  0.92010000   2.21251393
  0.92010000   2.32370930
  0.92010000   2.21339345
  0.92010000   2.32302743
  0.92010000   2.21420751
  0.92020000   2.19718022
  0.92020000   2.33582578
  0.92020000   2.19920101
  0.92020000   2.33437917
  0.92020000   2.20098376
  0.92020000   2.33308894
  0.92020000   2.20256845
  0.92020000   2.33193102
  0.92020000   2.20398628
  0.92020000   2.33088619
  0.92020000   2.20526204
  0.92020000   2.32993892
  0.92020000   2.20641571
  0.92020000   2.32907649
  0.92020000   2.20746359
  0.92020000   2.32828835
  0.92020000   2.20841913
  0.92020000   2.32756568
  0.92020000   2.20929351
  0.92020000   2.32690104
  0.92020000   2.21009618
  0.92020000   2.32628811
  0.92020000   2.21083512
  0.92030000   2.19471872
  0.92030000   2.33830869
  0.92030000   2.19663930
  0.92030000   2.33695079
  0.92030000   2.19832523
  0.92030000   2.33574617
  0.92030000   2.19981621
  0.92030000   2.33467098
  0.92030000   2.20114322
  0.92030000   2.33370623
  0.92030000   2.20233089
  0.92030000   2.33283654
  0.92030000   2.20339901
  0.92030000   2.33204935
  0.92030000   2.20436374
  0.92030000   2.33133422
  0.92030000   2.20523840
  0.92030000   2.33068247
  0.92030000   2.20603410
  0.92030000   2.33008675
  0.92030000   2.20676017
  0.92030000   2.32954082
  0.92030000   2.20742451
  0.92040000   2.19223119
  0.92040000   2.34079027
  0.92040000   2.19405024
  0.92040000   2.33952037
  0.92040000   2.19563834
  0.92040000   2.33840039
  0.92040000   2.19703492
  0.92040000   2.33740673
  0.92040000   2.19827077
  0.92040000   2.33652059
  0.92040000   2.19937028
  0.92040000   2.33572676
  0.92040000   2.20035313
  0.92040000   2.33501283
  0.92040000   2.20123531
  0.92040000   2.33436850
  0.92040000   2.20203004
  0.92040000   2.33378519
  0.92040000   2.20274831
  0.92040000   2.33325564
  0.92040000   2.20339936
  0.92040000   2.33277372
  0.92040000   2.20399100
  0.92050000   2.18972105
  0.92050000   2.34326743
  0.92050000   2.19143799
  0.92050000   2.34208422
  0.92050000   2.19292804
  0.92050000   2.34104728
  0.92050000   2.19423040
  0.92050000   2.34013325
  0.92050000   2.19537561
  0.92050000   2.33932354
  0.92050000   2.19638790
  0.92050000   2.33860311
  0.92050000   2.19728676
  0.92050000   2.33795969
  0.92050000   2.19808807
  0.92050000   2.33738313
  0.92050000   2.19880489
  0.92050000   2.33686495
  0.92050000   2.19944813
  0.92050000   2.33639801
  0.92050000   2.20002690
  0.92050000   2.33597627
  0.92050000   2.20054893
  0.92060000   2.18719172
  0.92060000   2.34573722
  0.92060000   2.18880663
  0.92060000   2.34463883
  0.92060000   2.19019919
  0.92060000   2.34368275
  0.92060000   2.19140828
  0.92060000   2.34284586
  0.92060000   2.19246425
  0.92060000   2.34210977
  0.92060000   2.19339112
  0.92060000   2.34145963
  0.92060000   2.19420820
  0.92060000   2.34088333
  0.92060000   2.19493123
  0.92060000   2.34037086
  0.92060000   2.19557314
  0.92060000   2.33991387
  0.92060000   2.19614469
  0.92060000   2.33950535
  0.92060000   2.19665489
  0.92060000   2.33913936
  0.92060000   2.19711136
  0.92070000   2.18464652
  0.92070000   2.34819685
  0.92070000   2.18616019
  0.92070000   2.34718094
  0.92070000   2.18745648
  0.92070000   2.34630302
  0.92070000   2.18857403
  0.92070000   2.34554026
  0.92070000   2.18954291
  0.92070000   2.34487446
  0.92070000   2.19038694
  0.92070000   2.34429099
  0.92070000   2.19112526
  0.92070000   2.34377791
  0.92070000   2.19177341
  0.92070000   2.34332536
  0.92070000   2.19234417
  0.92070000   2.34292515
  0.92070000   2.19284815
  0.92070000   2.34257041
  0.92070000   2.19329422
  0.92070000   2.34225532
  0.92070000   2.19368987
  0.92080000   2.18208873
  0.92080000   2.35064371
  0.92080000   2.18350255
  0.92080000   2.34970747
  0.92080000   2.18470448
  0.92080000   2.34890461
  0.92080000   2.18573285
  0.92080000   2.34821252
  0.92080000   2.18661747
  0.92080000   2.34761327
  0.92080000   2.18738194
  0.92080000   2.34709245
  0.92080000   2.18804514
  0.92080000   2.34663831
  0.92080000   2.18862245
  0.92080000   2.34624119
  0.92080000   2.18912643
  0.92080000   2.34589305
  0.92080000   2.18956753
  0.92080000   2.34558721
  0.92080000   2.18995443
  0.92080000   2.34531799
  0.92080000   2.19029446
  0.92090000   2.17952153
  0.92090000   2.35307533
  0.92090000   2.18083747
  0.92090000   2.35221564
  0.92090000   2.18194752
  0.92090000   2.35148434
  0.92090000   2.18288967
  0.92090000   2.35085915
  0.92090000   2.18369344
  0.92090000   2.35032240
  0.92090000   2.18438215
  0.92090000   2.34985993
  0.92090000   2.18497443
  0.92090000   2.34946022
  0.92090000   2.18548541
  0.92090000   2.34911382
  0.92090000   2.18592743
  0.92090000   2.34881292
  0.92090000   2.18631070
  0.92090000   2.34855101
  0.92090000   2.18664371
  0.92090000   2.34832262
  0.92090000   2.18693356
  0.92100000   2.17694799
  0.92100000   2.35548949
  0.92100000   2.17816852
  0.92100000   2.35470289
  0.92100000   2.17918969
  0.92100000   2.35403939
  0.92100000   2.18004908
  0.92100000   2.35347706
  0.92100000   2.18077589
  0.92100000   2.35299855
  0.92100000   2.18139308
  0.92100000   2.35258997
  0.92100000   2.18191902
  0.92100000   2.35224006
  0.92100000   2.18236851
  0.92100000   2.35193964
  0.92100000   2.18275364
  0.92100000   2.35168113
  0.92100000   2.18308434
  0.92100000   2.35145826
  0.92100000   2.18336884
  0.92100000   2.35126578
  0.92100000   2.18361399
  0.92110000   2.17437103
  0.92110000   2.35788414
  0.92110000   2.17549912
  0.92110000   2.35716693
  0.92110000   2.17643483
  0.92110000   2.35656728
  0.92110000   2.17721534
  0.92110000   2.35606362
  0.92110000   2.17786942
  0.92110000   2.35563895
  0.92110000   2.17841967
  0.92110000   2.35527972
  0.92110000   2.17888409
  0.92110000   2.35497498
  0.92110000   2.17927713
  0.92110000   2.35471585
  0.92110000   2.17961055
  0.92110000   2.35449501
  0.92110000   2.17989397
  0.92110000   2.35430646
  0.92110000   2.18013530
  0.92110000   2.35414520
  0.92110000   2.18034112
  0.92120000   2.17179347
  0.92120000   2.36025741
  0.92120000   2.17283244
  0.92120000   2.35960574
  0.92120000   2.17368651
  0.92120000   2.35906583
  0.92120000   2.17439233
  0.92120000   2.35861656
  0.92120000   2.17497820
  0.92120000   2.35824133
  0.92120000   2.17546628
  0.92120000   2.35792695
  0.92120000   2.17587413
  0.92120000   2.35766284
  0.92120000   2.17621581
  0.92120000   2.35744043
  0.92120000   2.17650269
  0.92120000   2.35725275
  0.92120000   2.17674402
  0.92120000   2.35709407
  0.92120000   2.17694735
  0.92120000   2.35695968
  0.92120000   2.17711892
  0.92130000   2.16921794
  0.92130000   2.36260768
  0.92130000   2.17017148
  0.92130000   2.36201756
  0.92130000   2.17094799
  0.92130000   2.36153323
  0.92130000   2.17158355
  0.92130000   2.36113406
  0.92130000   2.17210589
  0.92130000   2.36080388
  0.92130000   2.17253667
  0.92130000   2.36052996
  0.92130000   2.17289294
  0.92130000   2.36030209
  0.92130000   2.17318830
  0.92130000   2.36011209
  0.92130000   2.17343368
  0.92130000   2.35995332
  0.92130000   2.17363789
  0.92130000   2.35982040
  0.92130000   2.17380811
  0.92130000   2.35970891
  0.92130000   2.17395019
  0.92140000   2.16664693
  0.92140000   2.36493349
  0.92140000   2.16751899
  0.92140000   2.36440088
  0.92140000   2.16822226
  0.92140000   2.36396796
  0.92140000   2.16879213
  0.92140000   2.36361463
  0.92140000   2.16925571
  0.92140000   2.36332526
  0.92140000   2.16963405
  0.92140000   2.36308755
  0.92140000   2.16994366
  0.92140000   2.36289177
  0.92140000   2.17019759
  0.92140000   2.36273012
  0.92140000   2.17040627
  0.92140000   2.36259637
  0.92140000   2.17057806
  0.92140000   2.36248545
  0.92140000   2.17071970
  0.92140000   2.36239328
  0.92140000   2.17083664
  0.92150000   2.16408276
  0.92150000   2.36723358
  0.92150000   2.16487750
  0.92150000   2.36675445
  0.92150000   2.16551198
  0.92150000   2.36636881
  0.92150000   2.16602081
  0.92150000   2.36605719
  0.92150000   2.16643040
  0.92150000   2.36580451
  0.92150000   2.16676111
  0.92150000   2.36559900
  0.92150000   2.16702881
  0.92150000   2.36543141
  0.92150000   2.16724599
  0.92150000   2.36529438
  0.92150000   2.16742250
  0.92150000   2.36518208
  0.92150000   2.16756622
  0.92150000   2.36508981
  0.92150000   2.16768341
  0.92150000   2.36501381
  0.92150000   2.16777911
  0.92160000   2.16152757
  0.92160000   2.36950691
  0.92160000   2.16224930
  0.92160000   2.36907723
  0.92160000   2.16281952
  0.92160000   2.36873484
  0.92160000   2.16327199
  0.92160000   2.36846093
  0.92160000   2.16363228
  0.92160000   2.36824105
  0.92160000   2.16392001
  0.92160000   2.36806399
  0.92160000   2.16415036
  0.92160000   2.36792099
  0.92160000   2.16433516
  0.92160000   2.36780518
  0.92160000   2.16448370
  0.92160000   2.36771112
  0.92160000   2.16460331
  0.92160000   2.36763452
  0.92160000   2.16469977
  0.92160000   2.36757195
  0.92160000   2.16477770
  0.92170000   2.15898334
  0.92170000   2.37175258
  0.92170000   2.15963646
  0.92170000   2.37136842
  0.92170000   2.16014698
  0.92170000   2.37106539
  0.92170000   2.16054769
  0.92170000   2.37082539
  0.92170000   2.16086325
  0.92170000   2.37063464
  0.92170000   2.16111246
  0.92170000   2.37048253
  0.92170000   2.16130973
  0.92170000   2.37036084
  0.92170000   2.16146624
  0.92170000   2.37026318
  0.92170000   2.16159064
  0.92170000   2.37018455
  0.92170000   2.16168970
  0.92170000   2.37012102
  0.92170000   2.16176873
  0.92170000   2.37006950
  0.92170000   2.16183190
  0.92180000   2.15645185
  0.92180000   2.37396990
  0.92180000   2.15704081
  0.92180000   2.37362744
  0.92180000   2.15749616
  0.92180000   2.37336002
  0.92180000   2.15784959
  0.92180000   2.37315034
  0.92180000   2.15812481
  0.92180000   2.37298532
  0.92180000   2.15833971
  0.92180000   2.37285496
  0.92180000   2.15850792
  0.92180000   2.37275162
  0.92180000   2.15863986
  0.92180000   2.37266938
  0.92180000   2.15874357
  0.92180000   2.37260369
  0.92180000   2.15882526
  0.92180000   2.37255098
  0.92180000   2.15888975
  0.92180000   2.37250849
  0.92180000   2.15894076
  0.92190000   2.15393473
  0.92190000   2.37615831
  0.92190000   2.15446396
  0.92190000   2.37585387
  0.92190000   2.15486858
  0.92190000   2.37561853
  0.92190000   2.15517909
  0.92190000   2.37543581
  0.92190000   2.15541814
  0.92190000   2.37529337
  0.92190000   2.15560267
  0.92190000   2.37518187
  0.92190000   2.15574548
  0.92190000   2.37509422
  0.92190000   2.15585624
  0.92190000   2.37502500
  0.92190000   2.15594236
  0.92190000   2.37497008
  0.92190000   2.15600947
  0.92190000   2.37492627
  0.92190000   2.15606190
  0.92190000   2.37489112
  0.92190000   2.15610297
  0.92200000   2.15143343
  0.92200000   2.37831744
  0.92200000   2.15190733
  0.92200000   2.37804750
  0.92200000   2.15226552
  0.92200000   2.37784089
  0.92200000   2.15253726
  0.92200000   2.37768202
  0.92200000   2.15274406
  0.92200000   2.37755929
  0.92200000   2.15290188
  0.92200000   2.37746404
  0.92200000   2.15302264
  0.92200000   2.37738972
  0.92200000   2.15311527
  0.92200000   2.37733144
  0.92200000   2.15318651
  0.92200000   2.37728544
  0.92200000   2.15324146
  0.92200000   2.37724890
  0.92200000   2.15328397
  0.92200000   2.37721967
  0.92200000   2.15331697
  0.92210000   2.14894924
  0.92210000   2.38044703
  0.92210000   2.14937209
  0.92210000   2.38020825
  0.92210000   2.14968802
  0.92210000   2.38002727
  0.92210000   2.14992493
  0.92210000   2.37988938
  0.92210000   2.15010314
  0.92210000   2.37978377
  0.92210000   2.15023760
  0.92210000   2.37970242
  0.92210000   2.15033933
  0.92210000   2.37963939
  0.92210000   2.15041652
  0.92210000   2.37959021
  0.92210000   2.15047528
  0.92210000   2.37955156
  0.92210000   2.15052015
  0.92210000   2.37952093
  0.92210000   2.15055456
  0.92210000   2.37949644
  0.92210000   2.15058105
  0.92220000   2.14648327
  0.92220000   2.38254696
  0.92220000   2.14685926
  0.92220000   2.38233621
  0.92220000   2.14713690
  0.92220000   2.38217796
  0.92220000   2.14734266
  0.92220000   2.38205844
  0.92220000   2.14749567
  0.92220000   2.38196761
  0.92220000   2.14760981
  0.92220000   2.38189812
  0.92220000   2.14769522
  0.92220000   2.38184456
  0.92220000   2.14775935
  0.92220000   2.38180294
  0.92220000   2.14780769
  0.92220000   2.38177030
  0.92220000   2.14784427
  0.92220000   2.38174445
  0.92220000   2.14787209
  0.92220000   2.38172373
  0.92220000   2.14789336
  0.92230000   2.14403651
  0.92230000   2.38461723
  0.92230000   2.14436964
  0.92230000   2.38443157
  0.92230000   2.14461275
  0.92230000   2.38429340
  0.92230000   2.14479083
  0.92230000   2.38418987
  0.92230000   2.14492173
  0.92230000   2.38411175
  0.92230000   2.14501830
  0.92230000   2.38405230
  0.92230000   2.14508979
  0.92230000   2.38400667
  0.92230000   2.14514294
  0.92230000   2.38397128
  0.92230000   2.14518262
  0.92230000   2.38394353
  0.92230000   2.14521242
  0.92230000   2.38392151
  0.92230000   2.14523492
  0.92230000   2.38390380
  0.92230000   2.14525202
  0.92240000   2.14160975
  0.92240000   2.38665794
  0.92240000   2.14190389
  0.92240000   2.38649465
  0.92240000   2.14211602
  0.92240000   2.38637412
  0.92240000   2.14226959
  0.92240000   2.38628447
  0.92240000   2.14238121
  0.92240000   2.38621720
  0.92240000   2.14246266
  0.92240000   2.38616622
  0.92240000   2.14252234
  0.92240000   2.38612718
  0.92240000   2.14256630
  0.92240000   2.38609691
  0.92240000   2.14259886
  0.92240000   2.38607313
  0.92240000   2.14262312
  0.92240000   2.38605417
  0.92240000   2.14264135
  0.92240000   2.38603883
  0.92240000   2.14265515
  0.92250000   2.13920370
  0.92250000   2.38866930
  0.92250000   2.13946251
  0.92250000   2.38852585
  0.92250000   2.13964695
  0.92250000   2.38842077
  0.92250000   2.13977895
  0.92250000   2.38834308
  0.92250000   2.13987383
  0.92250000   2.38828504
  0.92250000   2.13994234
  0.92250000   2.38824117
  0.92250000   2.13999207
  0.92250000   2.38820758
  0.92250000   2.14002838
  0.92250000   2.38818149
  0.92250000   2.14005508
  0.92250000   2.38816090
  0.92250000   2.14007487
  0.92250000   2.38814439
  0.92250000   2.14008968
  0.92250000   2.38813092
  0.92250000   2.14010087
  0.92260000   2.13681890
  0.92260000   2.39065157
  0.92260000   2.13704583
  0.92260000   2.39052566
  0.92260000   2.13720566
  0.92260000   2.39043403
  0.92260000   2.13731875
  0.92260000   2.39036661
  0.92260000   2.13739917
  0.92260000   2.39031639
  0.92260000   2.13745667
  0.92260000   2.39027846
  0.92260000   2.13749805
  0.92260000   2.39024937
  0.92260000   2.13752803
  0.92260000   2.39022667
  0.92260000   2.13754994
  0.92260000   2.39020865
  0.92260000   2.13756613
  0.92260000   2.39019408
  0.92260000   2.13757821
  0.92260000   2.39018208
  0.92260000   2.13758736
  0.92270000   2.13445579
  0.92270000   2.39260512
  0.92270000   2.13465408
  0.92270000   2.39249464
  0.92270000   2.13479212
  0.92270000   2.39241467
  0.92270000   2.13488873
  0.92270000   2.39235604
  0.92270000   2.13495673
  0.92270000   2.39231241
  0.92270000   2.13500490
  0.92270000   2.39227941
  0.92270000   2.13503929
  0.92270000   2.39225400
  0.92270000   2.13506406
  0.92270000   2.39223406
  0.92270000   2.13508209
  0.92270000   2.39221809
  0.92270000   2.13509538
  0.92270000   2.39220505
  0.92270000   2.13510530
  0.92270000   2.39219420
  0.92270000   2.13511284
  0.92280000   2.13211469
  0.92280000   2.39453036
  0.92280000   2.13228736
  0.92280000   2.39443340
  0.92280000   2.13240621
  0.92280000   2.39436350
  0.92280000   2.13248851
  0.92280000   2.39431234
  0.92280000   2.13254589
  0.92280000   2.39427424
  0.92280000   2.13258620
  0.92280000   2.39424532
  0.92280000   2.13261478
  0.92280000   2.39422292
  0.92280000   2.13263528
  0.92280000   2.39420520
  0.92280000   2.13265016
  0.92280000   2.39419088
  0.92280000   2.13266113
  0.92280000   2.39417905
  0.92280000   2.13266935
  0.92280000   2.39416910
  0.92280000   2.13267562
  0.92290000   2.12979581
  0.92290000   2.39642776
  0.92290000   2.12994567
  0.92290000   2.39634259
  0.92290000   2.13004769
  0.92290000   2.39628135
  0.92290000   2.13011763
  0.92290000   2.39623651
  0.92290000   2.13016596
  0.92290000   2.39620303
  0.92290000   2.13019967
  0.92290000   2.39617748
  0.92290000   2.13022346
  0.92290000   2.39615754
  0.92290000   2.13024046
  0.92290000   2.39614161
  0.92290000   2.13025281
  0.92290000   2.39612859
  0.92290000   2.13026193
  0.92290000   2.39611772
  0.92290000   2.13026880
  0.92290000   2.39610848
  0.92290000   2.13027408
  0.92300000   2.12749928
  0.92300000   2.39829783
  0.92300000   2.12762891
  0.92300000   2.39822291
  0.92300000   2.12771624
  0.92300000   2.39816907
  0.92300000   2.12777555
  0.92300000   2.39812957
  0.92300000   2.12781622
  0.92300000   2.39809994
  0.92300000   2.12784442
  0.92300000   2.39807715
  0.92300000   2.12786425
  0.92300000   2.39805920
  0.92300000   2.12787842
  0.92300000   2.39804470
  0.92300000   2.12788872
  0.92300000   2.39803272
  0.92300000   2.12789638
  0.92300000   2.39802261
  0.92300000   2.12790218
  0.92300000   2.39801392
  0.92300000   2.12790669
  0.92310000   2.40023495
  0.92310000   2.12522513
  0.92310000   2.40014112
  0.92310000   2.12533691
  0.92310000   2.40007505
  0.92310000   2.12541147
  0.92310000   2.40002753
  0.92310000   2.12546169
  0.92310000   2.39999252
  0.92310000   2.12549589
  0.92310000   2.39996607
  0.92310000   2.12551952
  0.92310000   2.39994555
  0.92310000   2.12553610
  0.92310000   2.39992921
  0.92310000   2.12554797
  0.92310000   2.39991586
  0.92310000   2.12555664
  0.92310000   2.39990471
  0.92310000   2.12556312
  0.92310000   2.39989520
  0.92310000   2.12556809
  0.92310000   2.39988695
  0.92310000   2.12557199
  0.92320000   2.40204119
  0.92320000   2.12297334
  0.92320000   2.40195820
  0.92320000   2.12306943
  0.92320000   2.40189976
  0.92320000   2.12313294
  0.92320000   2.40185759
  0.92320000   2.12317541
  0.92320000   2.40182635
  0.92320000   2.12320419
  0.92320000   2.40180253
  0.92320000   2.12322402
  0.92320000   2.40178386
  0.92320000   2.12323795
  0.92320000   2.40176882
  0.92320000   2.12324796
  0.92320000   2.40175639
  0.92320000   2.12325532
  0.92320000   2.40174590
  0.92320000   2.12326087
  0.92320000   2.40173686
  0.92320000   2.12326518
  0.92320000   2.40172896
  0.92320000   2.12326860
  0.92330000   2.40382322
  0.92330000   2.12074380
  0.92330000   2.40374967
  0.92330000   2.12082616
  0.92330000   2.40369778
  0.92330000   2.12088016
  0.92330000   2.40366014
  0.92330000   2.12091605
  0.92330000   2.40363202
  0.92330000   2.12094030
  0.92330000   2.40361037
  0.92330000   2.12095701
  0.92330000   2.40359320
  0.92330000   2.12096878
  0.92330000   2.40357921
  0.92330000   2.12097728
  0.92330000   2.40356753
  0.92330000   2.12098359
  0.92330000   2.40355756
  0.92330000   2.12098841
  0.92330000   2.40354891
  0.92330000   2.12099219
  0.92330000   2.40354128
  0.92330000   2.12099524
  0.92340000   2.40558150
  0.92340000   2.11853635
  0.92340000   2.40551614
  0.92340000   2.11860675
  0.92340000   2.40546984
  0.92340000   2.11865260
  0.92340000   2.40543601
  0.92340000   2.11868294
  0.92340000   2.40541049
  0.92340000   2.11870341
  0.92340000   2.40539062
  0.92340000   2.11871755
  0.92340000   2.40537468
  0.92340000   2.11872756
  0.92340000   2.40536154
  0.92340000   2.11873485
  0.92340000   2.40535045
  0.92340000   2.11874033
  0.92340000   2.40534090
  0.92340000   2.11874456
  0.92340000   2.40533255
  0.92340000   2.11874792
  0.92340000   2.40532516
  0.92340000   2.11875066
  0.92350000   2.40731652
  0.92350000   2.11635077
  0.92350000   2.40725824
  0.92350000   2.11641080
  0.92350000   2.40721669
  0.92350000   2.11644969
  0.92350000   2.40718606
  0.92350000   2.11647537
  0.92350000   2.40716270
  0.92350000   2.11649271
  0.92350000   2.40714428
  0.92350000   2.11650474
  0.92350000   2.40712933
  0.92350000   2.11651333
  0.92350000   2.40711688
  0.92350000   2.11651965
  0.92350000   2.40710627
  0.92350000   2.11652445
  0.92350000   2.40709706
  0.92350000   2.11652821
  0.92350000   2.40708896
  0.92350000   2.11653124
  0.92350000   2.40708175
  0.92350000   2.11653374
  0.92360000   2.40902878
  0.92360000   2.11418681
  0.92360000   2.40897658
  0.92360000   2.11423789
  0.92360000   2.40893906
  0.92360000   2.11427088
  0.92360000   2.40891110
  0.92360000   2.11429265
  0.92360000   2.40888952
  0.92360000   2.11430741
  0.92360000   2.40887230
  0.92360000   2.11431771
  0.92360000   2.40885815
  0.92360000   2.11432514
  0.92360000   2.40884625
  0.92360000   2.11433068
  0.92360000   2.40883603
  0.92360000   2.11433495
  0.92360000   2.40882710
  0.92360000   2.11433833
  0.92360000   2.40881921
  0.92360000   2.11434108
  0.92360000   2.40881215
  0.92360000   2.11434338
  0.92370000   2.41071879
  0.92370000   2.11204416
  0.92370000   2.41067180
  0.92370000   2.11208757
  0.92370000   2.41063767
  0.92370000   2.11211555
  0.92370000   2.41061194
  0.92370000   2.11213407
  0.92370000   2.41059182
  0.92370000   2.11214670
  0.92370000   2.41057558
  0.92370000   2.11215560
  0.92370000   2.41056209
  0.92370000   2.11216210
  0.92370000   2.41055064
  0.92370000   2.11216701
  0.92370000   2.41054074
  0.92370000   2.11217084
  0.92370000   2.41053204
  0.92370000   2.11217391
  0.92370000   2.41052432
  0.92370000   2.11217644
  0.92370000   2.41051739
  0.92370000   2.11217857
  0.92380000   2.41238707
  0.92380000   2.10992251
  0.92380000   2.41234452
  0.92380000   2.10995935
  0.92380000   2.41231325
  0.92380000   2.10998313
  0.92380000   2.41228936
  0.92380000   2.10999894
  0.92380000   2.41227045
  0.92380000   2.11000983
  0.92380000   2.41225500
  0.92380000   2.11001759
  0.92380000   2.41224205
  0.92380000   2.11002333
  0.92380000   2.41223097
  0.92380000   2.11002772
  0.92380000   2.41222133
  0.92380000   2.11003120
  0.92380000   2.41221282
  0.92380000   2.11003402
  0.92380000   2.41220524
  0.92380000   2.11003636
  0.92380000   2.41219843
  0.92380000   2.11003835
  0.92390000   2.41403413
  0.92390000   2.10782149
  0.92390000   2.41399535
  0.92390000   2.10785275
  0.92390000   2.41396648
  0.92390000   2.10787300
  0.92390000   2.41394412
  0.92390000   2.10788659
  0.92390000   2.41392619
  0.92390000   2.10789604
  0.92390000   2.41391140
  0.92390000   2.10790287
  0.92390000   2.41389889
  0.92390000   2.10790799
  0.92390000   2.41388811
  0.92390000   2.10791197
  0.92390000   2.41387869
  0.92390000   2.10791515
  0.92390000   2.41387034
  0.92390000   2.10791777
  0.92390000   2.41386289
  0.92390000   2.10791996
  0.92390000   2.41385617
  0.92390000   2.10792182
  0.92400000   2.41566052
  0.92400000   2.10574073
  0.92400000   2.41562492
  0.92400000   2.10576726
  0.92400000   2.41559804
  0.92400000   2.10578458
  0.92400000   2.41557694
  0.92400000   2.10579633
  0.92400000   2.41555983
  0.92400000   2.10580460
  0.92400000   2.41554557
  0.92400000   2.10581068
  0.92400000   2.41553343
  0.92400000   2.10581530
  0.92400000   2.41552290
  0.92400000   2.10581894
  0.92400000   2.41551366
  0.92400000   2.10582188
  0.92400000   2.41550545
  0.92400000   2.10582432
  0.92400000   2.41549811
  0.92400000   2.10582637
  0.92400000   2.41549147
  0.92400000   2.10582813
  0.92410000   2.41726673
  0.92410000   2.10367983
  0.92410000   2.41723382
  0.92410000   2.10370239
  0.92410000   2.41720859
  0.92410000   2.10371728
  0.92410000   2.41718854
  0.92410000   2.10372751
  0.92410000   2.41717209
  0.92410000   2.10373483
  0.92410000   2.41715828
  0.92410000   2.10374028
  0.92410000   2.41714643
  0.92410000   2.10374450
  0.92410000   2.41713612
  0.92410000   2.10374785
  0.92410000   2.41712703
  0.92410000   2.10375059
  0.92410000   2.41711895
  0.92410000   2.10375287
  0.92410000   2.41711170
  0.92410000   2.10375481
  0.92410000   2.41710515
  0.92410000   2.10375648
  0.92420000   2.41885330
  0.92420000   2.10163840
  0.92420000   2.41882263
  0.92420000   2.10165763
  0.92420000   2.41879878
  0.92420000   2.10167050
  0.92420000   2.41877958
  0.92420000   2.10167949
  0.92420000   2.41876369
  0.92420000   2.10168603
  0.92420000   2.41875023
  0.92420000   2.10169098
  0.92420000   2.41873864
  0.92420000   2.10169485
  0.92420000   2.41872851
  0.92420000   2.10169797
  0.92420000   2.41871956
  0.92420000   2.10170054
  0.92420000   2.41871158
  0.92420000   2.10170269
  0.92420000   2.41870442
  0.92420000   2.10170453
  0.92420000   2.41869794
  0.92420000   2.10170611
  0.92430000   2.42042074
  0.92430000   2.09961601
  0.92430000   2.42039193
  0.92430000   2.09963247
  0.92430000   2.42036921
  0.92430000   2.09964368
  0.92430000   2.42035072
  0.92430000   2.09965166
  0.92430000   2.42033529
  0.92430000   2.09965756
  0.92430000   2.42032214
  0.92430000   2.09966209
  0.92430000   2.42031076
  0.92430000   2.09966568
  0.92430000   2.42030079
  0.92430000   2.09966860
  0.92430000   2.42029196
  0.92430000   2.09967102
  0.92430000   2.42028408
  0.92430000   2.09967306
  0.92430000   2.42027699
  0.92430000   2.09967480
  0.92430000   2.42027057
  0.92430000   2.09967631
  0.92440000   2.42196953
  0.92440000   2.09761225
  0.92440000   2.42194228
  0.92440000   2.09762642
  0.92440000   2.42192050
  0.92440000   2.09763627
  0.92440000   2.42190259
  0.92440000   2.09764341
  0.92440000   2.42188753
  0.92440000   2.09764879
  0.92440000   2.42187464
  0.92440000   2.09765298
  0.92440000   2.42186345
  0.92440000   2.09765633
  0.92440000   2.42185361
  0.92440000   2.09765908
  0.92440000   2.42184489
  0.92440000   2.09766136
  0.92440000   2.42183709
  0.92440000   2.09766330
  0.92440000   2.42183008
  0.92440000   2.09766496
  0.92440000   2.42182373
  0.92440000   2.09766640
  0.92450000   2.42350019
  0.92450000   2.09562670
  0.92450000   2.42347422
  0.92450000   2.09563898
  0.92450000   2.42345321
  0.92450000   2.09564771
  0.92450000   2.42343578
  0.92450000   2.09565418
  0.92450000   2.42342104
  0.92450000   2.09565912
  0.92450000   2.42340837
  0.92450000   2.09566302
  0.92450000   2.42339734
  0.92450000   2.09566617
  0.92450000   2.42338762
  0.92450000   2.09566877
  0.92450000   2.42337900
  0.92450000   2.09567094
  0.92450000   2.42337128
  0.92450000   2.09567278
  0.92450000   2.42336433
  0.92450000   2.09567436
  0.92450000   2.42335804
  0.92450000   2.09567574
  0.92460000   2.42501318
  0.92460000   2.09365893
  0.92460000   2.42498827
  0.92460000   2.09366966
  0.92460000   2.42496790
  0.92460000   2.09367749
  0.92460000   2.42495087
  0.92460000   2.09368339
  0.92460000   2.42493640
  0.92460000   2.09368798
  0.92460000   2.42492392
  0.92460000   2.09369164
  0.92460000   2.42491302
  0.92460000   2.09369461
  0.92460000   2.42490342
  0.92460000   2.09369707
  0.92460000   2.42489489
  0.92460000   2.09369914
  0.92460000   2.42488724
  0.92460000   2.09370090
  0.92460000   2.42488036
  0.92460000   2.09370241
  0.92460000   2.42487412
  0.92460000   2.09370372
  0.92470000   2.42650899
  0.92470000   2.09170852
  0.92470000   2.42648494
  0.92470000   2.09171800
  0.92470000   2.42646510
  0.92470000   2.09172508
  0.92470000   2.42644841
  0.92470000   2.09173053
  0.92470000   2.42643417
  0.92470000   2.09173482
  0.92470000   2.42642185
  0.92470000   2.09173826
  0.92470000   2.42641108
  0.92470000   2.09174108
  0.92470000   2.42640158
  0.92470000   2.09174343
  0.92470000   2.42639313
  0.92470000   2.09174540
  0.92470000   2.42638555
  0.92470000   2.09174708
  0.92470000   2.42637873
  0.92470000   2.09174852
  0.92470000   2.42637254
  0.92470000   2.09174978
  0.92480000   2.42798807
  0.92480000   2.08977506
  0.92480000   2.42796474
  0.92480000   2.08978352
  0.92480000   2.42794533
  0.92480000   2.08979000
  0.92480000   2.42792893
  0.92480000   2.08979507
  0.92480000   2.42791488
  0.92480000   2.08979910
  0.92480000   2.42790271
  0.92480000   2.08980237
  0.92480000   2.42789206
  0.92480000   2.08980505
  0.92480000   2.42788264
  0.92480000   2.08980728
  0.92480000   2.42787427
  0.92480000   2.08980917
  0.92480000   2.42786676
  0.92480000   2.08981078
  0.92480000   2.42785999
  0.92480000   2.08981216
  0.92480000   2.42785385
  0.92480000   2.08981336
  0.92490000   2.42945088
  0.92490000   2.08785814
  0.92490000   2.42942813
  0.92490000   2.08786577
  0.92490000   2.42940908
  0.92490000   2.08787176
  0.92490000   2.42939292
  0.92490000   2.08787652
  0.92490000   2.42937905
  0.92490000   2.08788033
  0.92490000   2.42936701
  0.92490000   2.08788343
  0.92490000   2.42935646
  0.92490000   2.08788599
  0.92490000   2.42934713
  0.92490000   2.08788813
  0.92490000   2.42933883
  0.92490000   2.08788993
  0.92490000   2.42933138
  0.92490000   2.08789147
  0.92490000   2.42932466
  0.92490000   2.08789279
  0.92490000   2.42931857
  0.92490000   2.08789394
  0.92500000   2.43089784
  0.92500000   2.08595735
  0.92500000   2.43087557
  0.92500000   2.08596432
  0.92500000   2.43085682
  0.92500000   2.08596991
  0.92500000   2.43084087
  0.92500000   2.08597440
  0.92500000   2.43082716
  0.92500000   2.08597802
  0.92500000   2.43081524
  0.92500000   2.08598098
  0.92500000   2.43080478
  0.92500000   2.08598343
  0.92500000   2.43079554
  0.92500000   2.08598547
  0.92500000   2.43078730
  0.92500000   2.08598720
  0.92500000   2.43077991
  0.92500000   2.08598867
  0.92500000   2.43077325
  0.92500000   2.08598994
  0.92500000   2.43076720
  0.92500000   2.08599104
  0.92510000   2.43232938
  0.92510000   2.08407230
  0.92510000   2.43230750
  0.92510000   2.08407874
  0.92510000   2.43228901
  0.92510000   2.08408400
  0.92510000   2.43227325
  0.92510000   2.08408825
  0.92510000   2.43225967
  0.92510000   2.08409171
  0.92510000   2.43224786
  0.92510000   2.08409454
  0.92510000   2.43223749
  0.92510000   2.08409689
  0.92510000   2.43222833
  0.92510000   2.08409884
  0.92510000   2.43222015
  0.92510000   2.08410050
  0.92510000   2.43221282
  0.92510000   2.08410191
  0.92510000   2.43220620
  0.92510000   2.08410313
  0.92510000   2.43220020
  0.92510000   2.08410418
  0.92520000   2.43374591
  0.92520000   2.08220259
  0.92520000   2.43372435
  0.92520000   2.08220861
  0.92520000   2.43370608
  0.92520000   2.08221359
  0.92520000   2.43369048
  0.92520000   2.08221765
  0.92520000   2.43367703
  0.92520000   2.08222096
  0.92520000   2.43366532
  0.92520000   2.08222368
  0.92520000   2.43365504
  0.92520000   2.08222592
  0.92520000   2.43364595
  0.92520000   2.08222780
  0.92520000   2.43363784
  0.92520000   2.08222939
  0.92520000   2.43363056
  0.92520000   2.08223074
  0.92520000   2.43362399
  0.92520000   2.08223191
  0.92520000   2.43361803
  0.92520000   2.08223291
  0.92530000   2.43514783
  0.92530000   2.08034786
  0.92530000   2.43512653
  0.92530000   2.08035354
  0.92530000   2.43510845
  0.92530000   2.08035829
  0.92530000   2.43509300
  0.92530000   2.08036217
  0.92530000   2.43507966
  0.92530000   2.08036535
  0.92530000   2.43506806
  0.92530000   2.08036795
  0.92530000   2.43505786
  0.92530000   2.08037011
  0.92530000   2.43504883
  0.92530000   2.08037191
  0.92530000   2.43504078
  0.92530000   2.08037343
  0.92530000   2.43503355
  0.92530000   2.08037473
  0.92530000   2.43502703
  0.92530000   2.08037585
  0.92530000   2.43502111
  0.92530000   2.08037682
  0.92540000   2.43653550
  0.92540000   2.07850774
  0.92540000   2.43651444
  0.92540000   2.07851314
  0.92540000   2.43649653
  0.92540000   2.07851769
  0.92540000   2.43648121
  0.92540000   2.07852142
  0.92540000   2.43646798
  0.92540000   2.07852447
  0.92540000   2.43645646
  0.92540000   2.07852697
  0.92540000   2.43644634
  0.92540000   2.07852904
  0.92540000   2.43643738
  0.92540000   2.07853077
  0.92540000   2.43642939
  0.92540000   2.07853223
  0.92540000   2.43642221
  0.92540000   2.07853348
  0.92540000   2.43641573
  0.92540000   2.07853455
  0.92540000   2.43640985
  0.92540000   2.07853547
  0.92550000   2.43790932
  0.92550000   2.07668186
  0.92550000   2.43788844
  0.92550000   2.07668704
  0.92550000   2.43787068
  0.92550000   2.07669141
  0.92550000   2.43785549
  0.92550000   2.07669501
  0.92550000   2.43784237
  0.92550000   2.07669794
  0.92550000   2.43783094
  0.92550000   2.07670034
  0.92550000   2.43782089
  0.92550000   2.07670233
  0.92550000   2.43781199
  0.92550000   2.07670399
  0.92550000   2.43780405
  0.92550000   2.07670539
  0.92550000   2.43779692
  0.92550000   2.07670659
  0.92550000   2.43779048
  0.92550000   2.07670762
  0.92550000   2.43778464
  0.92550000   2.07670850
  0.92560000   2.43926963
  0.92560000   2.07486988
  0.92560000   2.43924892
  0.92560000   2.07487487
  0.92560000   2.43923130
  0.92560000   2.07487910
  0.92560000   2.43921622
  0.92560000   2.07488256
  0.92560000   2.43920319
  0.92560000   2.07488538
  0.92560000   2.43919184
  0.92560000   2.07488769
  0.92560000   2.43918187
  0.92560000   2.07488961
  0.92560000   2.43917303
  0.92560000   2.07489120
  0.92560000   2.43916514
  0.92560000   2.07489255
  0.92560000   2.43915806
  0.92560000   2.07489370
  0.92560000   2.43915166
  0.92560000   2.07489468
  0.92560000   2.43914585
  0.92560000   2.07489553
  0.92570000   2.44061677
  0.92570000   2.07307147
  0.92570000   2.44059621
  0.92570000   2.07307630
  0.92570000   2.44057871
  0.92570000   2.07308039
  0.92570000   2.44056374
  0.92570000   2.07308373
  0.92570000   2.44055082
  0.92570000   2.07308645
  0.92570000   2.44053955
  0.92570000   2.07308867
  0.92570000   2.44052964
  0.92570000   2.07309051
  0.92570000   2.44052086
  0.92570000   2.07309205
  0.92570000   2.44051303
  0.92570000   2.07309334
  0.92570000   2.44050598
  0.92570000   2.07309444
  0.92570000   2.44049963
  0.92570000   2.07309538
  0.92570000   2.44049385
  0.92570000   2.07309619
  0.92580000   2.44195108
  0.92580000   2.07128629
  0.92580000   2.44193065
  0.92580000   2.07129099
  0.92580000   2.44191328
  0.92580000   2.07129495
  0.92580000   2.44189842
  0.92580000   2.07129817
  0.92580000   2.44188558
  0.92580000   2.07130079
  0.92580000   2.44187439
  0.92580000   2.07130294
  0.92580000   2.44186455
  0.92580000   2.07130470
  0.92580000   2.44185582
  0.92580000   2.07130618
  0.92580000   2.44184803
  0.92580000   2.07130742
  0.92580000   2.44184104
  0.92580000   2.07130847
  0.92580000   2.44183472
  0.92580000   2.07130938
  0.92580000   2.44182898
  0.92580000   2.07131016
  0.92590000   2.44327289
  0.92590000   2.06951403
  0.92590000   2.44325257
  0.92590000   2.06951862
  0.92590000   2.44323532
  0.92590000   2.06952245
  0.92590000   2.44322055
  0.92590000   2.06952557
  0.92590000   2.44320780
  0.92590000   2.06952810
  0.92590000   2.44319669
  0.92590000   2.06953016
  0.92590000   2.44318691
  0.92590000   2.06953186
  0.92590000   2.44317824
  0.92590000   2.06953328
  0.92590000   2.44317050
  0.92590000   2.06953447
  0.92590000   2.44316355
  0.92590000   2.06953548
  0.92590000   2.44315726
  0.92590000   2.06953634
  0.92590000   2.44315155
  0.92590000   2.06953709
  0.92600000   2.44458248
  0.92600000   2.06775440
  0.92600000   2.44456229
  0.92600000   2.06775888
  0.92600000   2.44454514
  0.92600000   2.06776259
  0.92600000   2.44453048
  0.92600000   2.06776560
  0.92600000   2.44451781
  0.92600000   2.06776804
  0.92600000   2.44450676
  0.92600000   2.06777003
  0.92600000   2.44449705
  0.92600000   2.06777166
  0.92600000   2.44448843
  0.92600000   2.06777302
  0.92600000   2.44448074
  0.92600000   2.06777417
  0.92600000   2.44447382
  0.92600000   2.06777514
  0.92600000   2.44446758
  0.92600000   2.06777597
  0.92600000   2.44446190
  0.92600000   2.06777668
  0.92610000   2.44588018
  0.92610000   2.06600709
  0.92610000   2.44586009
  0.92610000   2.06601146
  0.92610000   2.44584305
  0.92610000   2.06601507
  0.92610000   2.44582848
  0.92610000   2.06601798
  0.92610000   2.44581590
  0.92610000   2.06602033
  0.92610000   2.44580492
  0.92610000   2.06602224
  0.92610000   2.44579526
  0.92610000   2.06602381
  0.92610000   2.44578670
  0.92610000   2.06602512
  0.92610000   2.44577905
  0.92610000   2.06602622
  0.92610000   2.44577217
  0.92610000   2.06602715
  0.92610000   2.44576596
  0.92610000   2.06602794
  0.92610000   2.44576032
  0.92610000   2.06602863
  0.92620000   2.44716625
  0.92620000   2.06427182
  0.92620000   2.44714627
  0.92620000   2.06427609
  0.92620000   2.44712934
  0.92620000   2.06427959
  0.92620000   2.44711486
  0.92620000   2.06428241
  0.92620000   2.44710235
  0.92620000   2.06428467
  0.92620000   2.44709145
  0.92620000   2.06428651
  0.92620000   2.44708185
  0.92620000   2.06428802
  0.92620000   2.44707333
  0.92620000   2.06428928
  0.92620000   2.44706572
  0.92620000   2.06429033
  0.92620000   2.44705889
  0.92620000   2.06429122
  0.92620000   2.44705271
  0.92620000   2.06429199
  0.92620000   2.44704709
  0.92620000   2.06429264
  0.92630000   2.44844098
  0.92630000   2.06254831
  0.92630000   2.44842111
  0.92630000   2.06255249
  0.92630000   2.44840428
  0.92630000   2.06255588
  0.92630000   2.44838989
  0.92630000   2.06255860
  0.92630000   2.44837746
  0.92630000   2.06256079
  0.92630000   2.44836662
  0.92630000   2.06256256
  0.92630000   2.44835707
  0.92630000   2.06256401
  0.92630000   2.44834860
  0.92630000   2.06256522
  0.92630000   2.44834104
  0.92630000   2.06256623
  0.92630000   2.44833424
  0.92630000   2.06256708
  0.92630000   2.44832809
  0.92630000   2.06256781
  0.92630000   2.44832251
  0.92630000   2.06256844
  0.92640000   2.44970464
  0.92640000   2.06083631
  0.92640000   2.44968487
  0.92640000   2.06084039
  0.92640000   2.44966814
  0.92640000   2.06084368
  0.92640000   2.44965384
  0.92640000   2.06084631
  0.92640000   2.44964148
  0.92640000   2.06084841
  0.92640000   2.44963070
  0.92640000   2.06085012
  0.92640000   2.44962121
  0.92640000   2.06085152
  0.92640000   2.44961279
  0.92640000   2.06085267
  0.92640000   2.44960527
  0.92640000   2.06085364
  0.92640000   2.44959850
  0.92640000   2.06085446
  0.92640000   2.44959239
  0.92640000   2.06085516
  0.92640000   2.44958683
  0.92640000   2.06085576
  0.92650000   2.45095748
  0.92650000   2.05913555
  0.92650000   2.45093781
  0.92650000   2.05913953
  0.92650000   2.45092118
  0.92650000   2.05914273
  0.92650000   2.45090696
  0.92650000   2.05914526
  0.92650000   2.45089468
  0.92650000   2.05914729
  0.92650000   2.45088396
  0.92650000   2.05914893
  0.92650000   2.45087452
  0.92650000   2.05915027
  0.92650000   2.45086615
  0.92650000   2.05915139
  0.92650000   2.45085866
  0.92650000   2.05915232
  0.92650000   2.45085193
  0.92650000   2.05915310
  0.92650000   2.45084585
  0.92650000   2.05915377
  0.92650000   2.45084032
  0.92650000   2.05915434
  0.92660000   2.45219974
  0.92660000   2.05744579
  0.92660000   2.45218018
  0.92660000   2.05744967
  0.92660000   2.45216364
  0.92660000   2.05745277
  0.92660000   2.45214951
  0.92660000   2.05745522
  0.92660000   2.45213729
  0.92660000   2.05745717
  0.92660000   2.45212664
  0.92660000   2.05745875
  0.92660000   2.45211725
  0.92660000   2.05746004
  0.92660000   2.45210892
  0.92660000   2.05746111
  0.92660000   2.45210147
  0.92660000   2.05746200
  0.92660000   2.45209478
  0.92660000   2.05746275
  0.92660000   2.45208872
  0.92660000   2.05746339
  0.92660000   2.45208322
  0.92660000   2.05746394
  0.92670000   2.45343167
  0.92670000   2.05576679
  0.92670000   2.45341221
  0.92670000   2.05577058
  0.92670000   2.45339577
  0.92670000   2.05577357
  0.92670000   2.45338172
  0.92670000   2.05577594
  0.92670000   2.45336958
  0.92670000   2.05577782
  0.92670000   2.45335897
  0.92670000   2.05577934
  0.92670000   2.45334964
  0.92670000   2.05578058
  0.92670000   2.45334135
  0.92670000   2.05578161
  0.92670000   2.45333394
  0.92670000   2.05578246
  0.92670000   2.45332728
  0.92670000   2.05578318
  0.92670000   2.45332125
  0.92670000   2.05578379
  0.92670000   2.45331577
  0.92670000   2.05578431
  0.92680000   2.45465350
  0.92680000   2.05409832
  0.92680000   2.45463414
  0.92680000   2.05410201
  0.92680000   2.45461779
  0.92680000   2.05410491
  0.92680000   2.45460382
  0.92680000   2.05410719
  0.92680000   2.45459175
  0.92680000   2.05410901
  0.92680000   2.45458120
  0.92680000   2.05411047
  0.92680000   2.45457191
  0.92680000   2.05411166
  0.92680000   2.45456367
  0.92680000   2.05411265
  0.92680000   2.45455630
  0.92680000   2.05411347
  0.92680000   2.45454967
  0.92680000   2.05411415
  0.92680000   2.45454367
  0.92680000   2.05411474
  0.92680000   2.45453821
  0.92680000   2.05411523
  0.92690000   2.45586545
  0.92690000   2.05244017
  0.92690000   2.45584620
  0.92690000   2.05244375
  0.92690000   2.45582994
  0.92690000   2.05244656
  0.92690000   2.45581604
  0.92690000   2.05244876
  0.92690000   2.45580403
  0.92690000   2.05245051
  0.92690000   2.45579354
  0.92690000   2.05245192
  0.92690000   2.45578430
  0.92690000   2.05245306
  0.92690000   2.45577610
  0.92690000   2.05245401
  0.92690000   2.45576876
  0.92690000   2.05245479
  0.92690000   2.45576216
  0.92690000   2.05245545
  0.92690000   2.45575619
  0.92690000   2.05245601
  0.92690000   2.45575076
  0.92690000   2.05245648
  0.92700000   2.45706773
  0.92700000   2.05079211
  0.92700000   2.45704858
  0.92700000   2.05079559
  0.92700000   2.45703241
  0.92700000   2.05079831
  0.92700000   2.45701859
  0.92700000   2.05080043
  0.92700000   2.45700664
  0.92700000   2.05080212
  0.92700000   2.45699621
  0.92700000   2.05080347
  0.92700000   2.45698701
  0.92700000   2.05080457
  0.92700000   2.45697885
  0.92700000   2.05080548
  0.92700000   2.45697155
  0.92700000   2.05080623
  0.92700000   2.45696498
  0.92700000   2.05080686
  0.92700000   2.45695903
  0.92700000   2.05080739
  0.92700000   2.45695363
  0.92700000   2.05080784
  0.92710000   2.45826055
  0.92710000   2.04915394
  0.92710000   2.45824150
  0.92710000   2.04915732
  0.92710000   2.45822542
  0.92710000   2.04915995
  0.92710000   2.45821168
  0.92710000   2.04916200
  0.92710000   2.45819979
  0.92710000   2.04916362
  0.92710000   2.45818941
  0.92710000   2.04916492
  0.92710000   2.45818026
  0.92710000   2.04916598
  0.92710000   2.45817213
  0.92710000   2.04916684
  0.92710000   2.45816486
  0.92710000   2.04916756
  0.92710000   2.45815832
  0.92710000   2.04916816
  0.92710000   2.45815241
  0.92710000   2.04916867
  0.92710000   2.45814703
  0.92710000   2.04916910
  0.92720000   2.45944411
  0.92720000   2.04752546
  0.92720000   2.45942517
  0.92720000   2.04752874
  0.92720000   2.45940917
  0.92720000   2.04753128
  0.92720000   2.45939550
  0.92720000   2.04753326
  0.92720000   2.45938367
  0.92720000   2.04753482
  0.92720000   2.45937334
  0.92720000   2.04753607
  0.92720000   2.45936424
  0.92720000   2.04753708
  0.92720000   2.45935615
  0.92720000   2.04753791
  0.92720000   2.45934891
  0.92720000   2.04753860
  0.92720000   2.45934240
  0.92720000   2.04753917
  0.92720000   2.45933651
  0.92720000   2.04753966
  0.92720000   2.45933115
  0.92720000   2.04754006
  0.92730000   2.46061861
  0.92730000   2.04590648
  0.92730000   2.46059976
  0.92730000   2.04590966
  0.92730000   2.46058386
  0.92730000   2.04591211
  0.92730000   2.46057025
  0.92730000   2.04591402
  0.92730000   2.46055849
  0.92730000   2.04591552
  0.92730000   2.46054820
  0.92730000   2.04591672
  0.92730000   2.46053914
  0.92730000   2.04591769
  0.92730000   2.46053109
  0.92730000   2.04591849
  0.92730000   2.46052389
  0.92730000   2.04591915
  0.92730000   2.46051740
  0.92730000   2.04591969
  0.92730000   2.46051154
  0.92730000   2.04592015
  0.92730000   2.46050620
  0.92730000   2.04592054
  0.92740000   2.46178423
  0.92740000   2.04429681
  0.92740000   2.46176548
  0.92740000   2.04429989
  0.92740000   2.46174966
  0.92740000   2.04430226
  0.92740000   2.46173612
  0.92740000   2.04430410
  0.92740000   2.46172441
  0.92740000   2.04430554
  0.92740000   2.46171418
  0.92740000   2.04430670
  0.92740000   2.46170516
  0.92740000   2.04430763
  0.92740000   2.46169714
  0.92740000   2.04430839
  0.92740000   2.46168997
  0.92740000   2.04430902
  0.92740000   2.46168351
  0.92740000   2.04430954
  0.92740000   2.46167767
  0.92740000   2.04430997
  0.92740000   2.46167236
  0.92740000   2.04431034
  0.92750000   2.46294115
  0.92750000   2.04269627
  0.92750000   2.46292250
  0.92750000   2.04269926
  0.92750000   2.46290676
  0.92750000   2.04270154
  0.92750000   2.46289329
  0.92750000   2.04270331
  0.92750000   2.46288163
  0.92750000   2.04270471
  0.92750000   2.46287145
  0.92750000   2.04270581
  0.92750000   2.46286247
  0.92750000   2.04270671
  0.92750000   2.46285449
  0.92750000   2.04270743
  0.92750000   2.46284735
  0.92750000   2.04270803
  0.92750000   2.46284092
  0.92750000   2.04270853
  0.92750000   2.46283510
  0.92750000   2.04270894
  0.92750000   2.46282981
  0.92750000   2.04270929
  0.92760000   2.46408954
  0.92760000   2.04110469
  0.92760000   2.46407099
  0.92760000   2.04110758
  0.92760000   2.46405533
  0.92760000   2.04110979
  0.92760000   2.46404193
  0.92760000   2.04111149
  0.92760000   2.46403033
  0.92760000   2.04111283
  0.92760000   2.46402019
  0.92760000   2.04111389
  0.92760000   2.46401125
  0.92760000   2.04111475
  0.92760000   2.46400330
  0.92760000   2.04111545
  0.92760000   2.46399619
  0.92760000   2.04111602
  0.92760000   2.46398979
  0.92760000   2.04111649
  0.92760000   2.46398399
  0.92760000   2.04111688
  0.92760000   2.46397872
  0.92760000   2.04111721
  0.92770000   2.46522959
  0.92770000   2.03952190
  0.92770000   2.46521113
  0.92770000   2.03952470
  0.92770000   2.46519554
  0.92770000   2.03952683
  0.92770000   2.46518220
  0.92770000   2.03952847
  0.92770000   2.46517066
  0.92770000   2.03952975
  0.92770000   2.46516057
  0.92770000   2.03953077
  0.92770000   2.46515166
  0.92770000   2.03953159
  0.92770000   2.46514375
  0.92770000   2.03953226
  0.92770000   2.46513667
  0.92770000   2.03953280
  0.92770000   2.46513029
  0.92770000   2.03953325
  0.92770000   2.46512452
  0.92770000   2.03953362
  0.92770000   2.46511927
  0.92770000   2.03953393
  0.92780000   2.46636144
  0.92780000   2.03794773
  0.92780000   2.46634307
  0.92780000   2.03795044
  0.92780000   2.46632756
  0.92780000   2.03795249
  0.92780000   2.46631429
  0.92780000   2.03795407
  0.92780000   2.46630280
  0.92780000   2.03795531
  0.92780000   2.46629275
  0.92780000   2.03795629
  0.92780000   2.46628388
  0.92780000   2.03795707
  0.92780000   2.46627600
  0.92780000   2.03795771
  0.92780000   2.46626895
  0.92780000   2.03795822
  0.92780000   2.46626260
  0.92780000   2.03795865
  0.92780000   2.46625685
  0.92780000   2.03795900
  0.92780000   2.46625162
  0.92780000   2.03795929
  0.92790000   2.46748526
  0.92790000   2.03638203
  0.92790000   2.46746698
  0.92790000   2.03638465
  0.92790000   2.46745155
  0.92790000   2.03638663
  0.92790000   2.46743834
  0.92790000   2.03638815
  0.92790000   2.46742690
  0.92790000   2.03638934
  0.92790000   2.46741689
  0.92790000   2.03639027
  0.92790000   2.46740806
  0.92790000   2.03639103
  0.92790000   2.46740021
  0.92790000   2.03639163
  0.92790000   2.46739319
  0.92790000   2.03639212
  0.92790000   2.46738686
  0.92790000   2.03639252
  0.92790000   2.46738114
  0.92790000   2.03639286
  0.92790000   2.46737593
  0.92790000   2.03639313
  0.92800000   2.46860120
  0.92800000   2.03482465
  0.92800000   2.46858302
  0.92800000   2.03482717
  0.92800000   2.46856766
  0.92800000   2.03482909
  0.92800000   2.46855450
  0.92800000   2.03483055
  0.92800000   2.46854311
  0.92800000   2.03483169
  0.92800000   2.46853315
  0.92800000   2.03483259
  0.92800000   2.46852436
  0.92800000   2.03483330
  0.92800000   2.46851654
  0.92800000   2.03483388
  0.92800000   2.46850954
  0.92800000   2.03483435
  0.92800000   2.46850324
  0.92800000   2.03483473
  0.92800000   2.46849754
  0.92800000   2.03483504
  0.92800000   2.46849235
  0.92800000   2.03483530
  0.92810000   2.46970941
  0.92810000   2.03327542
  0.92810000   2.46969132
  0.92810000   2.03327787
  0.92810000   2.46967603
  0.92810000   2.03327971
  0.92810000   2.46966293
  0.92810000   2.03328112
  0.92810000   2.46965159
  0.92810000   2.03328221
  0.92810000   2.46964167
  0.92810000   2.03328308
  0.92810000   2.46963292
  0.92810000   2.03328376
  0.92810000   2.46962513
  0.92810000   2.03328431
  0.92810000   2.46961816
  0.92810000   2.03328475
  0.92810000   2.46961189
  0.92810000   2.03328511
  0.92810000   2.46960620
  0.92810000   2.03328540
  0.92810000   2.46960103
  0.92810000   2.03328565
  0.92820000   2.47081004
  0.92820000   2.03173423
  0.92820000   2.47079204
  0.92820000   2.03173659
  0.92820000   2.47077682
  0.92820000   2.03173836
  0.92820000   2.47076378
  0.92820000   2.03173972
  0.92820000   2.47075249
  0.92820000   2.03174077
  0.92820000   2.47074260
  0.92820000   2.03174159
  0.92820000   2.47073388
  0.92820000   2.03174225
  0.92820000   2.47072613
  0.92820000   2.03174277
  0.92820000   2.47071919
  0.92820000   2.03174319
  0.92820000   2.47071293
  0.92820000   2.03174353
  0.92820000   2.47070727
  0.92820000   2.03174380
  0.92820000   2.47070212
  0.92820000   2.03174403
  0.92830000   2.47190323
  0.92830000   2.03020092
  0.92830000   2.47188531
  0.92830000   2.03020320
  0.92830000   2.47187016
  0.92830000   2.03020490
  0.92830000   2.47185718
  0.92830000   2.03020621
  0.92830000   2.47184593
  0.92830000   2.03020721
  0.92830000   2.47183609
  0.92830000   2.03020800
  0.92830000   2.47182740
  0.92830000   2.03020862
  0.92830000   2.47181968
  0.92830000   2.03020912
  0.92830000   2.47181276
  0.92830000   2.03020951
  0.92830000   2.47180653
  0.92830000   2.03020983
  0.92830000   2.47180089
  0.92830000   2.03021009
  0.92830000   2.47179576
  0.92830000   2.03021030
  0.92840000   2.47298911
  0.92840000   2.02867535
  0.92840000   2.47297127
  0.92840000   2.02867755
  0.92840000   2.47295619
  0.92840000   2.02867920
  0.92840000   2.47294326
  0.92840000   2.02868045
  0.92840000   2.47293206
  0.92840000   2.02868141
  0.92840000   2.47292226
  0.92840000   2.02868216
  0.92840000   2.47291361
  0.92840000   2.02868276
  0.92840000   2.47290591
  0.92840000   2.02868323
  0.92840000   2.47289902
  0.92840000   2.02868360
  0.92840000   2.47289281
  0.92840000   2.02868390
  0.92840000   2.47288719
  0.92840000   2.02868414
  0.92840000   2.47288208
  0.92840000   2.02868434
  0.92850000   2.47406781
  0.92850000   2.02715740
  0.92850000   2.47405006
  0.92850000   2.02715952
  0.92850000   2.47403504
  0.92850000   2.02716111
  0.92850000   2.47402217
  0.92850000   2.02716231
  0.92850000   2.47401101
  0.92850000   2.02716323
  0.92850000   2.47400125
  0.92850000   2.02716395
  0.92850000   2.47399263
  0.92850000   2.02716451
  0.92850000   2.47398496
  0.92850000   2.02716496
  0.92850000   2.47397810
  0.92850000   2.02716531
  0.92850000   2.47397191
  0.92850000   2.02716559
  0.92850000   2.47396631
  0.92850000   2.02716582
  0.92850000   2.47396121
  0.92850000   2.02716600
  0.92860000   2.47513947
  0.92860000   2.02564694
  0.92860000   2.47512179
  0.92860000   2.02564898
  0.92860000   2.47510684
  0.92860000   2.02565051
  0.92860000   2.47509403
  0.92860000   2.02565166
  0.92860000   2.47508291
  0.92860000   2.02565255
  0.92860000   2.47507319
  0.92860000   2.02565323
  0.92860000   2.47506460
  0.92860000   2.02565377
  0.92860000   2.47505696
  0.92860000   2.02565419
  0.92860000   2.47505012
  0.92860000   2.02565452
  0.92860000   2.47504396
  0.92860000   2.02565478
  0.92860000   2.47503838
  0.92860000   2.02565499
  0.92860000   2.47503330
  0.92860000   2.02565515
  0.92870000   2.47620420
  0.92870000   2.02414384
  0.92870000   2.47618661
  0.92870000   2.02414581
  0.92870000   2.47617172
  0.92870000   2.02414728
  0.92870000   2.47615896
  0.92870000   2.02414839
  0.92870000   2.47614789
  0.92870000   2.02414923
  0.92870000   2.47613820
  0.92870000   2.02414989
  0.92870000   2.47612965
  0.92870000   2.02415039
  0.92870000   2.47612204
  0.92870000   2.02415079
  0.92870000   2.47611522
  0.92870000   2.02415110
  0.92870000   2.47610908
  0.92870000   2.02415135
  0.92870000   2.47610351
  0.92870000   2.02415154
  0.92870000   2.47609845
  0.92870000   2.02415169
  0.92880000   2.47726214
  0.92880000   2.02264798
  0.92880000   2.47724462
  0.92880000   2.02264989
  0.92880000   2.47722980
  0.92880000   2.02265130
  0.92880000   2.47721708
  0.92880000   2.02265236
  0.92880000   2.47720606
  0.92880000   2.02265317
  0.92880000   2.47719641
  0.92880000   2.02265379
  0.92880000   2.47718788
  0.92880000   2.02265427
  0.92880000   2.47718030
  0.92880000   2.02265464
  0.92880000   2.47717351
  0.92880000   2.02265493
  0.92880000   2.47716739
  0.92880000   2.02265516
  0.92880000   2.47716184
  0.92880000   2.02265534
  0.92880000   2.47715680
  0.92880000   2.02265548
  0.92890000   2.47831339
  0.92890000   2.02115926
  0.92890000   2.47829595
  0.92890000   2.02116109
  0.92890000   2.47828119
  0.92890000   2.02116245
  0.92890000   2.47826852
  0.92890000   2.02116346
  0.92890000   2.47825754
  0.92890000   2.02116423
  0.92890000   2.47824793
  0.92890000   2.02116483
  0.92890000   2.47823943
  0.92890000   2.02116528
  0.92890000   2.47823188
  0.92890000   2.02116563
  0.92890000   2.47822511
  0.92890000   2.02116590
  0.92890000   2.47821901
  0.92890000   2.02116611
  0.92890000   2.47821349
  0.92890000   2.02116628
  0.92890000   2.47820846
  0.92890000   2.02116640
  0.92900000   2.47935808
  0.92900000   2.01967754
  0.92900000   2.47934071
  0.92900000   2.01967931
  0.92900000   2.47932601
  0.92900000   2.01968061
  0.92900000   2.47931339
  0.92900000   2.01968158
  0.92900000   2.47930246
  0.92900000   2.01968232
  0.92900000   2.47929287
  0.92900000   2.01968288
  0.92900000   2.47928441
  0.92900000   2.01968331
  0.92900000   2.47927688
  0.92900000   2.01968364
  0.92900000   2.47927014
  0.92900000   2.01968389
  0.92900000   2.47926406
  0.92900000   2.01968408
  0.92900000   2.47925855
  0.92900000   2.01968423
  0.92900000   2.47925354
  0.92900000   2.01968434
  0.92910000   2.48039630
  0.92910000   2.01820273
  0.92910000   2.48037901
  0.92910000   2.01820443
  0.92910000   2.48036437
  0.92910000   2.01820568
  0.92910000   2.48035181
  0.92910000   2.01820661
  0.92910000   2.48034091
  0.92910000   2.01820731
  0.92910000   2.48033136
  0.92910000   2.01820784
  0.92910000   2.48032293
  0.92910000   2.01820825
  0.92910000   2.48031543
  0.92910000   2.01820855
  0.92910000   2.48030870
  0.92910000   2.01820879
  0.92910000   2.48030265
  0.92910000   2.01820896
  0.92910000   2.48029716
  0.92910000   2.01820910
  0.92910000   2.48029216
  0.92910000   2.01820920
  0.92920000   2.48142819
  0.92920000   2.01673470
  0.92920000   2.48141097
  0.92920000   2.01673634
  0.92920000   2.48139638
  0.92920000   2.01673754
  0.92920000   2.48138387
  0.92920000   2.01673843
  0.92920000   2.48137301
  0.92920000   2.01673910
  0.92920000   2.48136350
  0.92920000   2.01673960
  0.92920000   2.48135510
  0.92920000   2.01673998
  0.92920000   2.48134762
  0.92920000   2.01674027
  0.92920000   2.48134092
  0.92920000   2.01674049
  0.92920000   2.48133488
  0.92920000   2.01674065
  0.92920000   2.48132941
  0.92920000   2.01674077
  0.92920000   2.48132443
  0.92920000   2.01674085
  0.92930000   2.48245382
  0.92930000   2.01527337
  0.92930000   2.48243668
  0.92930000   2.01527495
  0.92930000   2.48242215
  0.92930000   2.01527610
  0.92930000   2.48240969
  0.92930000   2.01527695
  0.92930000   2.48239887
  0.92930000   2.01527758
  0.92930000   2.48238939
  0.92930000   2.01527806
  0.92930000   2.48238102
  0.92930000   2.01527842
  0.92930000   2.48237356
  0.92930000   2.01527868
  0.92930000   2.48236688
  0.92930000   2.01527888
  0.92930000   2.48236087
  0.92930000   2.01527903
  0.92930000   2.48235541
  0.92930000   2.01527913
  0.92930000   2.48235045
  0.92930000   2.01527920
  0.92940000   2.48347333
  0.92940000   2.01381862
  0.92940000   2.48345625
  0.92940000   2.01382014
  0.92940000   2.48344178
  0.92940000   2.01382124
  0.92940000   2.48342936
  0.92940000   2.01382206
  0.92940000   2.48341859
  0.92940000   2.01382266
  0.92940000   2.48340914
  0.92940000   2.01382310
  0.92940000   2.48340079
  0.92940000   2.01382344
  0.92940000   2.48339337
  0.92940000   2.01382369
  0.92940000   2.48338671
  0.92940000   2.01382387
  0.92940000   2.48338071
  0.92940000   2.01382400
  0.92940000   2.48337527
  0.92940000   2.01382409
  0.92940000   2.48337033
  0.92940000   2.01382415
  0.92950000   2.48448679
  0.92950000   2.01237036
  0.92950000   2.48446979
  0.92950000   2.01237182
  0.92950000   2.48445537
  0.92950000   2.01237288
  0.92950000   2.48444300
  0.92950000   2.01237365
  0.92950000   2.48443226
  0.92950000   2.01237422
  0.92950000   2.48442285
  0.92950000   2.01237465
  0.92950000   2.48441453
  0.92950000   2.01237495
  0.92950000   2.48440713
  0.92950000   2.01237518
  0.92950000   2.48440049
  0.92950000   2.01237535
  0.92950000   2.48439451
  0.92950000   2.01237546
  0.92950000   2.48438909
  0.92950000   2.01237554
  0.92950000   2.48438416
  0.92950000   2.01237559
  0.92960000   2.48549432
  0.92960000   2.01092850
  0.92960000   2.48547738
  0.92960000   2.01092990
  0.92960000   2.48546302
  0.92960000   2.01093091
  0.92960000   2.48545069
  0.92960000   2.01093164
  0.92960000   2.48543999
  0.92960000   2.01093218
  0.92960000   2.48543061
  0.92960000   2.01093258
  0.92960000   2.48542232
  0.92960000   2.01093287
  0.92960000   2.48541494
  0.92960000   2.01093308
  0.92960000   2.48540833
  0.92960000   2.01093322
  0.92960000   2.48540237
  0.92960000   2.01093333
  0.92960000   2.48539697
  0.92960000   2.01093339
  0.92960000   2.48539205
  0.92960000   2.01093343
  0.92970000   2.48649599
  0.92970000   2.00949292
  0.92970000   2.48647913
  0.92970000   2.00949427
  0.92970000   2.48646482
  0.92970000   2.00949523
  0.92970000   2.48645254
  0.92970000   2.00949593
  0.92970000   2.48644188
  0.92970000   2.00949644
  0.92970000   2.48643253
  0.92970000   2.00949681
  0.92970000   2.48642427
  0.92970000   2.00949708
  0.92970000   2.48641691
  0.92970000   2.00949727
  0.92970000   2.48641032
  0.92970000   2.00949740
  0.92970000   2.48640438
  0.92970000   2.00949749
  0.92970000   2.48639899
  0.92970000   2.00949754
  0.92970000   2.48639409
  0.92970000   2.00949757
  0.92980000   2.48749192
  0.92980000   2.00806355
  0.92980000   2.48747512
  0.92980000   2.00806484
  0.92980000   2.48746087
  0.92980000   2.00806576
  0.92980000   2.48744863
  0.92980000   2.00806643
  0.92980000   2.48743801
  0.92980000   2.00806691
  0.92980000   2.48742869
  0.92980000   2.00806726
  0.92980000   2.48742046
  0.92980000   2.00806750
  0.92980000   2.48741313
  0.92980000   2.00806767
  0.92980000   2.48740655
  0.92980000   2.00806779
  0.92980000   2.48740063
  0.92980000   2.00806786
  0.92980000   2.48739526
  0.92980000   2.00806790
  0.92980000   2.48739037
  0.92980000   2.00806792
  0.92990000   2.48848219
  0.92990000   2.00664029
  0.92990000   2.48846545
  0.92990000   2.00664153
  0.92990000   2.48845126
  0.92990000   2.00664241
  0.92990000   2.48843906
  0.92990000   2.00664304
  0.92990000   2.48842847
  0.92990000   2.00664349
  0.92990000   2.48841919
  0.92990000   2.00664381
  0.92990000   2.48841098
  0.92990000   2.00664404
  0.92990000   2.48840367
  0.92990000   2.00664419
  0.92990000   2.48839712
  0.92990000   2.00664430
  0.92990000   2.48839122
  0.92990000   2.00664436
  0.92990000   2.48838586
  0.92990000   2.00664438
  0.92990000   2.48838099
  0.92990000   2.00664439
  0.93000000   2.48946688
  0.93000000   2.00522306
  0.93000000   2.48945021
  0.93000000   2.00522424
  0.93000000   2.48943607
  0.93000000   2.00522508
  0.93000000   2.48942392
  0.93000000   2.00522568
  0.93000000   2.48941337
  0.93000000   2.00522611
  0.93000000   2.48940411
  0.93000000   2.00522640
  0.93000000   2.48939593
  0.93000000   2.00522661
  0.93000000   2.48938865
  0.93000000   2.00522675
  0.93000000   2.48938211
  0.93000000   2.00522683
  0.93000000   2.48937623
  0.93000000   2.00522688
  0.93000000   2.48937089
  0.93000000   2.00522690
  0.93000000   2.48936603
  0.93000000   2.00522689
  0.93010000   2.49044608
  0.93010000   2.00381177
  0.93010000   2.49042948
  0.93010000   2.00381290
  0.93010000   2.49041539
  0.93010000   2.00381370
  0.93010000   2.49040328
  0.93010000   2.00381427
  0.93010000   2.49039277
  0.93010000   2.00381466
  0.93010000   2.49038354
  0.93010000   2.00381494
  0.93010000   2.49037539
  0.93010000   2.00381512
  0.93010000   2.49036813
  0.93010000   2.00381524
  0.93010000   2.49036162
  0.93010000   2.00381532
  0.93010000   2.49035575
  0.93010000   2.00381535
  0.93010000   2.49035042
  0.93010000   2.00381536
  0.93010000   2.49034558
  0.93010000   2.00381534
  0.93020000   2.49141989
  0.93020000   2.00240633
  0.93020000   2.49140335
  0.93020000   2.00240742
  0.93020000   2.49138931
  0.93020000   2.00240817
  0.93020000   2.49137725
  0.93020000   2.00240871
  0.93020000   2.49136677
  0.93020000   2.00240908
  0.93020000   2.49135757
  0.93020000   2.00240933
  0.93020000   2.49134945
  0.93020000   2.00240950
  0.93020000   2.49134220
  0.93020000   2.00240960
  0.93020000   2.49133571
  0.93020000   2.00240966
  0.93020000   2.49132986
  0.93020000   2.00240968
  0.93020000   2.49132455
  0.93020000   2.00240968
  0.93020000   2.49131972
  0.93020000   2.00240965
  0.93030000   2.49238837
  0.93030000   2.00100667
  0.93030000   2.49237190
  0.93030000   2.00100771
  0.93030000   2.49235791
  0.93030000   2.00100843
  0.93030000   2.49234589
  0.93030000   2.00100893
  0.93030000   2.49233544
  0.93030000   2.00100928
  0.93030000   2.49232628
  0.93030000   2.00100951
  0.93030000   2.49231818
  0.93030000   2.00100966
  0.93030000   2.49231096
  0.93030000   2.00100974
  0.93030000   2.49230449
  0.93030000   2.00100979
  0.93030000   2.49229865
  0.93030000   2.00100980
  0.93030000   2.49229336
  0.93030000   2.00100978
  0.93030000   2.49228854
  0.93030000   2.00100974
  0.93040000   2.49335161
  0.93040000   1.99961271
  0.93040000   2.49333520
  0.93040000   1.99961370
  0.93040000   2.49332127
  0.93040000   1.99961438
  0.93040000   2.49330929
  0.93040000   1.99961485
  0.93040000   2.49329888
  0.93040000   1.99961517
  0.93040000   2.49328974
  0.93040000   1.99961538
  0.93040000   2.49328167
  0.93040000   1.99961551
  0.93040000   2.49327447
  0.93040000   1.99961558
  0.93040000   2.49326802
  0.93040000   1.99961561
  0.93040000   2.49326220
  0.93040000   1.99961561
  0.93040000   2.49325692
  0.93040000   1.99961558
  0.93040000   2.49325212
  0.93040000   1.99961554
  0.93050000   2.49430969
  0.93050000   1.99822436
  0.93050000   2.49429335
  0.93050000   1.99822531
  0.93050000   2.49427946
  0.93050000   1.99822595
  0.93050000   2.49426753
  0.93050000   1.99822639
  0.93050000   2.49425715
  0.93050000   1.99822669
  0.93050000   2.49424804
  0.93050000   1.99822688
  0.93050000   2.49423999
  0.93050000   1.99822699
  0.93050000   2.49423282
  0.93050000   1.99822704
  0.93050000   2.49422638
  0.93050000   1.99822706
  0.93050000   2.49422058
  0.93050000   1.99822705
  0.93050000   2.49421532
  0.93050000   1.99822701
  0.93050000   2.49421053
  0.93050000   1.99822696
  0.93060000   2.49526269
  0.93060000   1.99684156
  0.93060000   2.49524641
  0.93060000   1.99684246
  0.93060000   2.49523257
  0.93060000   1.99684307
  0.93060000   2.49522068
  0.93060000   1.99684348
  0.93060000   2.49521033
  0.93060000   1.99684375
  0.93060000   2.49520126
  0.93060000   1.99684392
  0.93060000   2.49519323
  0.93060000   1.99684401
  0.93060000   2.49518608
  0.93060000   1.99684406
  0.93060000   2.49517966
  0.93060000   1.99684406
  0.93060000   2.49517388
  0.93060000   1.99684403
  0.93060000   2.49516863
  0.93060000   1.99684398
  0.93060000   2.49516385
  0.93060000   1.99684392
  0.93070000   2.49621068
  0.93070000   1.99546423
  0.93070000   2.49619446
  0.93070000   1.99546508
  0.93070000   2.49618067
  0.93070000   1.99546565
  0.93070000   2.49616881
  0.93070000   1.99546604
  0.93070000   2.49615850
  0.93070000   1.99546628
  0.93070000   2.49614946
  0.93070000   1.99546643
  0.93070000   2.49614146
  0.93070000   1.99546651
  0.93070000   2.49613432
  0.93070000   1.99546654
  0.93070000   2.49612793
  0.93070000   1.99546653
  0.93070000   2.49612216
  0.93070000   1.99546649
  0.93070000   2.49611693
  0.93070000   1.99546643
  0.93070000   2.49611217
  0.93070000   1.99546636
  0.93080000   2.49715372
  0.93080000   1.99409229
  0.93080000   2.49713756
  0.93080000   1.99409310
  0.93080000   2.49712383
  0.93080000   1.99409364
  0.93080000   2.49711201
  0.93080000   1.99409400
  0.93080000   2.49710174
  0.93080000   1.99409422
  0.93080000   2.49709272
  0.93080000   1.99409435
  0.93080000   2.49708474
  0.93080000   1.99409441
  0.93080000   2.49707763
  0.93080000   1.99409442
  0.93080000   2.49707126
  0.93080000   1.99409440
  0.93080000   2.49706550
  0.93080000   1.99409435
  0.93080000   2.49706029
  0.93080000   1.99409428
  0.93080000   2.49705554
  0.93080000   1.99409420
  0.93090000   2.49809190
  0.93090000   1.99272568
  0.93090000   2.49807581
  0.93090000   1.99272645
  0.93090000   2.49806212
  0.93090000   1.99272696
  0.93090000   2.49805035
  0.93090000   1.99272728
  0.93090000   2.49804010
  0.93090000   1.99272748
  0.93090000   2.49803111
  0.93090000   1.99272759
  0.93090000   2.49802316
  0.93090000   1.99272764
  0.93090000   2.49801607
  0.93090000   1.99272763
  0.93090000   2.49800971
  0.93090000   1.99272760
  0.93090000   2.49800398
  0.93090000   1.99272754
  0.93090000   2.49799878
  0.93090000   1.99272747
  0.93090000   2.49799404
  0.93090000   1.99272738
  0.93100000   2.49902529
  0.93100000   1.99136433
  0.93100000   2.49900925
  0.93100000   1.99136505
  0.93100000   2.49899562
  0.93100000   1.99136553
  0.93100000   2.49898388
  0.93100000   1.99136583
  0.93100000   2.49897367
  0.93100000   1.99136600
  0.93100000   2.49896471
  0.93100000   1.99136609
  0.93100000   2.49895678
  0.93100000   1.99136612
  0.93100000   2.49894971
  0.93100000   1.99136611
  0.93100000   2.49894337
  0.93100000   1.99136606
  0.93100000   2.49893766
  0.93100000   1.99136599
  0.93100000   2.49893247
  0.93100000   1.99136591
  0.93100000   2.49892775
  0.93100000   1.99136581
  0.93110000   2.49995394
  0.93110000   1.99000816
  0.93110000   2.49993797
  0.93110000   1.99000885
  0.93110000   2.49992438
  0.93110000   1.99000929
  0.93110000   2.49991269
  0.93110000   1.99000956
  0.93110000   2.49990251
  0.93110000   1.99000972
  0.93110000   2.49989358
  0.93110000   1.99000979
  0.93110000   2.49988567
  0.93110000   1.99000981
  0.93110000   2.49987863
  0.93110000   1.99000978
  0.93110000   2.49987230
  0.93110000   1.99000972
  0.93110000   2.49986660
  0.93110000   1.99000964
  0.93110000   2.49986143
  0.93110000   1.99000954
  0.93110000   2.49985672
  0.93110000   1.99000944
  0.93120000   2.50087794
  0.93120000   1.98865712
  0.93120000   2.50086202
  0.93120000   1.98865777
  0.93120000   2.50084849
  0.93120000   1.98865818
  0.93120000   2.50083683
  0.93120000   1.98865842
  0.93120000   2.50082669
  0.93120000   1.98865856
  0.93120000   2.50081778
  0.93120000   1.98865861
  0.93120000   2.50080990
  0.93120000   1.98865861
  0.93120000   2.50080288
  0.93120000   1.98865857
  0.93120000   2.50079657
  0.93120000   1.98865850
  0.93120000   2.50079089
  0.93120000   1.98865841
  0.93120000   2.50078573
  0.93120000   1.98865831
  0.93120000   2.50078103
  0.93120000   1.98865819
  0.93130000   2.50179733
  0.93130000   1.98731114
  0.93130000   2.50178148
  0.93130000   1.98731175
  0.93130000   2.50176799
  0.93130000   1.98731213
  0.93130000   2.50175638
  0.93130000   1.98731235
  0.93130000   2.50174627
  0.93130000   1.98731246
  0.93130000   2.50173739
  0.93130000   1.98731250
  0.93130000   2.50172953
  0.93130000   1.98731248
  0.93130000   2.50172253
  0.93130000   1.98731243
  0.93130000   2.50171624
  0.93130000   1.98731234
  0.93130000   2.50171057
  0.93130000   1.98731225
  0.93130000   2.50170543
  0.93130000   1.98731213
  0.93130000   2.50170074
  0.93130000   1.98731201
  0.93140000   2.50271220
  0.93140000   1.98597015
  0.93140000   2.50269641
  0.93140000   1.98597072
  0.93140000   2.50268297
  0.93140000   1.98597107
  0.93140000   2.50267139
  0.93140000   1.98597127
  0.93140000   2.50266132
  0.93140000   1.98597136
  0.93140000   2.50265247
  0.93140000   1.98597138
  0.93140000   2.50264463
  0.93140000   1.98597135
  0.93140000   2.50263765
  0.93140000   1.98597128
  0.93140000   2.50263138
  0.93140000   1.98597119
  0.93140000   2.50262573
  0.93140000   1.98597108
  0.93140000   2.50262060
  0.93140000   1.98597096
  0.93140000   2.50261592
  0.93140000   1.98597083
  0.93150000   2.50362260
  0.93150000   1.98463409
  0.93150000   2.50360686
  0.93150000   1.98463463
  0.93150000   2.50359347
  0.93150000   1.98463495
  0.93150000   2.50358194
  0.93150000   1.98463512
  0.93150000   2.50357189
  0.93150000   1.98463520
  0.93150000   2.50356307
  0.93150000   1.98463520
  0.93150000   2.50355526
  0.93150000   1.98463516
  0.93150000   2.50354830
  0.93150000   1.98463508
  0.93150000   2.50354205
  0.93150000   1.98463497
  0.93150000   2.50353641
  0.93150000   1.98463485
  0.93150000   2.50353129
  0.93150000   1.98463472
  0.93150000   2.50352663
  0.93150000   1.98463459
  0.93160000   2.50452858
  0.93160000   1.98330290
  0.93160000   2.50451291
  0.93160000   1.98330342
  0.93160000   2.50449957
  0.93160000   1.98330371
  0.93160000   2.50448807
  0.93160000   1.98330386
  0.93160000   2.50447806
  0.93160000   1.98330391
  0.93160000   2.50446927
  0.93160000   1.98330390
  0.93160000   2.50446148
  0.93160000   1.98330384
  0.93160000   2.50445454
  0.93160000   1.98330375
  0.93160000   2.50444831
  0.93160000   1.98330363
  0.93160000   2.50444268
  0.93160000   1.98330350
  0.93160000   2.50443758
  0.93160000   1.98330337
  0.93160000   2.50443293
  0.93160000   1.98330322
  0.93170000   2.50543022
  0.93170000   1.98197653
  0.93170000   2.50541461
  0.93170000   1.98197703
  0.93170000   2.50540132
  0.93170000   1.98197728
  0.93170000   2.50538986
  0.93170000   1.98197741
  0.93170000   2.50537988
  0.93170000   1.98197744
  0.93170000   2.50537111
  0.93170000   1.98197741
  0.93170000   2.50536335
  0.93170000   1.98197734
  0.93170000   2.50535643
  0.93170000   1.98197723
  0.93170000   2.50535021
  0.93170000   1.98197711
  0.93170000   2.50534461
  0.93170000   1.98197697
  0.93170000   2.50533952
  0.93170000   1.98197683
  0.93170000   2.50533488
  0.93170000   1.98197668
  0.93180000   2.50632758
  0.93180000   1.98065490
  0.93180000   2.50631201
  0.93180000   1.98065539
  0.93180000   2.50629877
  0.93180000   1.98065561
  0.93180000   2.50628735
  0.93180000   1.98065571
  0.93180000   2.50627741
  0.93180000   1.98065573
  0.93180000   2.50626867
  0.93180000   1.98065568
  0.93180000   2.50626093
  0.93180000   1.98065560
  0.93180000   2.50625403
  0.93180000   1.98065548
  0.93180000   2.50624783
  0.93180000   1.98065535
  0.93180000   2.50624224
  0.93180000   1.98065520
  0.93180000   2.50623716
  0.93180000   1.98065505
  0.93180000   2.50623254
  0.93180000   1.98065489
  0.93190000   2.50722070
  0.93190000   1.97933796
  0.93190000   2.50720518
  0.93190000   1.97933845
  0.93190000   2.50719200
  0.93190000   1.97933864
  0.93190000   2.50718062
  0.93190000   1.97933872
  0.93190000   2.50717071
  0.93190000   1.97933872
  0.93190000   2.50716199
  0.93190000   1.97933866
  0.93190000   2.50715428
  0.93190000   1.97933856
  0.93190000   2.50714740
  0.93190000   1.97933843
  0.93190000   2.50714122
  0.93190000   1.97933829
  0.93190000   2.50713564
  0.93190000   1.97933813
  0.93190000   2.50713058
  0.93190000   1.97933797
  0.93190000   2.50712597
  0.93190000   1.97933781
  0.93200000   2.50810966
  0.93200000   1.97802566
  0.93200000   2.50809417
  0.93200000   1.97802617
  0.93200000   2.50808104
  0.93200000   1.97802631
  0.93200000   2.50806970
  0.93200000   1.97802638
  0.93200000   2.50805982
  0.93200000   1.97802636
  0.93200000   2.50805114
  0.93200000   1.97802628
  0.93200000   2.50804345
  0.93200000   1.97802617
  0.93200000   2.50803658
  0.93200000   1.97802603
  0.93200000   2.50803042
  0.93200000   1.97802588
  0.93200000   2.50802486
  0.93200000   1.97802571
  0.93200000   2.50801982
  0.93200000   1.97802554
  0.93200000   2.50801522
  0.93200000   1.97802537
  0.93210000   2.50899450
  0.93210000   1.97671792
  0.93210000   2.50897903
  0.93210000   1.97671848
  0.93210000   2.50896597
  0.93210000   1.97671858
  0.93210000   2.50895466
  0.93210000   1.97671863
  0.93210000   2.50894482
  0.93210000   1.97671858
  0.93210000   2.50893617
  0.93210000   1.97671850
  0.93210000   2.50892850
  0.93210000   1.97671837
  0.93210000   2.50892165
  0.93210000   1.97671822
  0.93210000   2.50891551
  0.93210000   1.97671806
  0.93210000   2.50890997
  0.93210000   1.97671789
  0.93210000   2.50890493
  0.93210000   1.97671771
  0.93210000   2.50890034
  0.93210000   1.97671753
  0.93220000   2.50987528
  0.93220000   1.97541469
  0.93220000   2.50985982
  0.93220000   1.97541533
  0.93220000   2.50984682
  0.93220000   1.97541538
  0.93220000   2.50983556
  0.93220000   1.97541541
  0.93220000   2.50982575
  0.93220000   1.97541535
  0.93220000   2.50981712
  0.93220000   1.97541525
  0.93220000   2.50980948
  0.93220000   1.97541511
  0.93220000   2.50980266
  0.93220000   1.97541495
  0.93220000   2.50979653
  0.93220000   1.97541478
  0.93220000   2.50979100
  0.93220000   1.97541460
  0.93220000   2.50978598
  0.93220000   1.97541441
  0.93220000   2.50978141
  0.93220000   1.97541423
  0.93230000   2.51075207
  0.93230000   1.97411591
  0.93230000   2.51073659
  0.93230000   1.97411668
  0.93230000   2.51072367
  0.93230000   1.97411667
  0.93230000   2.51071244
  0.93230000   1.97411669
  0.93230000   2.51070267
  0.93230000   1.97411661
  0.93230000   2.51069407
  0.93230000   1.97411649
  0.93230000   2.51068644
  0.93230000   1.97411634
  0.93230000   2.51067964
  0.93230000   1.97411617
  0.93230000   2.51067353
  0.93230000   1.97411599
  0.93230000   2.51066802
  0.93230000   1.97411580
  0.93230000   2.51066302
  0.93230000   1.97411561
  0.93230000   2.51065845
  0.93230000   1.97411542
  0.93240000   2.51162491
  0.93240000   1.97282153
  0.93240000   2.51160939
  0.93240000   1.97282248
  0.93240000   2.51159655
  0.93240000   1.97282238
  0.93240000   2.51158536
  0.93240000   1.97282240
  0.93240000   2.51157562
  0.93240000   1.97282230
  0.93240000   2.51156705
  0.93240000   1.97282217
  0.93240000   2.51155945
  0.93240000   1.97282200
  0.93240000   2.51155267
  0.93240000   1.97282182
  0.93240000   2.51154658
  0.93240000   1.97282163
  0.93240000   2.51154108
  0.93240000   1.97282143
  0.93240000   2.51153609
  0.93240000   1.97282124
  0.93240000   2.51153154
  0.93240000   1.97282104
  0.93250000   2.51249385
  0.93250000   1.97153149
  0.93250000   2.51247827
  0.93250000   1.97153268
  0.93250000   2.51246552
  0.93250000   1.97153248
  0.93250000   2.51245436
  0.93250000   1.97153249
  0.93250000   2.51244466
  0.93250000   1.97153237
  0.93250000   2.51243611
  0.93250000   1.97153223
  0.93250000   2.51242854
  0.93250000   1.97153205
  0.93250000   2.51242178
  0.93250000   1.97153186
  0.93250000   2.51241571
  0.93250000   1.97153166
  0.93250000   2.51241022
  0.93250000   1.97153146
  0.93250000   2.51240525
  0.93250000   1.97153125
  0.93250000   2.51240071
  0.93250000   1.97153105
  0.93260000   2.51335895
  0.93260000   1.97024574
  0.93260000   2.51334327
  0.93260000   1.97024722
  0.93260000   2.51333062
  0.93260000   1.97024691
  0.93260000   2.51331950
  0.93260000   1.97024693
  0.93260000   2.51330983
  0.93260000   1.97024678
  0.93260000   2.51330132
  0.93260000   1.97024663
  0.93260000   2.51329377
  0.93260000   1.97024644
  0.93260000   2.51328703
  0.93260000   1.97024624
  0.93260000   2.51328098
  0.93260000   1.97024603
  0.93260000   2.51327551
  0.93260000   1.97024582
  0.93260000   2.51327055
  0.93260000   1.97024561
  0.93260000   2.51326602
  0.93260000   1.97024540
  0.93270000   2.51422023
  0.93270000   1.96896428
  0.93270000   2.51420446
  0.93270000   1.96896605
  0.93270000   2.51419192
  0.93270000   1.96896562
  0.93270000   2.51418082
  0.93270000   1.96896565
  0.93270000   2.51417120
  0.93270000   1.96896548
  0.93270000   2.51416271
  0.93270000   1.96896531
  0.93270000   2.51415519
  0.93270000   1.96896512
  0.93270000   2.51414847
  0.93270000   1.96896491
  0.93270000   2.51414243
  0.93270000   1.96896469
  0.93270000   2.51413698
  0.93270000   1.96896447
  0.93270000   2.51413203
  0.93270000   1.96896425
  0.93270000   2.51412752
  0.93270000   1.96896404
  0.93280000   2.51507770
  0.93280000   1.96768712
  0.93280000   2.51506188
  0.93280000   1.96768912
  0.93280000   2.51504944
  0.93280000   1.96768858
  0.93280000   2.51503837
  0.93280000   1.96768861
  0.93280000   2.51502879
  0.93280000   1.96768842
  0.93280000   2.51502034
  0.93280000   1.96768824
  0.93280000   2.51501284
  0.93280000   1.96768803
  0.93280000   2.51500614
  0.93280000   1.96768781
  0.93280000   2.51500013
  0.93280000   1.96768759
  0.93280000   2.51499469
  0.93280000   1.96768736
  0.93280000   2.51498975
  0.93280000   1.96768714
  0.93280000   2.51498525
  0.93280000   1.96768692
  0.93290000   2.51593136
  0.93290000   1.96641432
  0.93290000   2.51591559
  0.93290000   1.96641633
  0.93290000   2.51590323
  0.93290000   1.96641574
  0.93290000   2.51589221
  0.93290000   1.96641577
  0.93290000   2.51588267
  0.93290000   1.96641556
  0.93290000   2.51587424
  0.93290000   1.96641537
  0.93290000   2.51586677
  0.93290000   1.96641514
  0.93290000   2.51586010
  0.93290000   1.96641492
  0.93290000   2.51585410
  0.93290000   1.96641468
  0.93290000   2.51584868
  0.93290000   1.96641445
  0.93290000   2.51584376
  0.93290000   1.96641422
  0.93290000   2.51583927
  0.93290000   1.96641399
  0.93300000   2.51678113
  0.93300000   1.96514605
  0.93300000   2.51676569
  0.93300000   1.96514759
  0.93300000   2.51675334
  0.93300000   1.96514708
  0.93300000   2.51674238
  0.93300000   1.96514706
  0.93300000   2.51673287
  0.93300000   1.96514684
  0.93300000   2.51672448
  0.93300000   1.96514664
  0.93300000   2.51671703
  0.93300000   1.96514641
  0.93300000   2.51671038
  0.93300000   1.96514617
  0.93300000   2.51670440
  0.93300000   1.96514593
  0.93300000   2.51669900
  0.93300000   1.96514569
  0.93300000   2.51669409
  0.93300000   1.96514545
  0.93300000   2.51668962
  0.93300000   1.96514522
  0.93310000   2.51762690
  0.93310000   1.96388258
  0.93310000   2.51761225
  0.93310000   1.96388274
  0.93310000   2.51759977
  0.93310000   1.96388259
  0.93310000   2.51758892
  0.93310000   1.96388245
  0.93310000   2.51757944
  0.93310000   1.96388224
  0.93310000   2.51757108
  0.93310000   1.96388201
  0.93310000   2.51756366
  0.93310000   1.96388177
  0.93310000   2.51755703
  0.93310000   1.96388153
  0.93310000   2.51755107
  0.93310000   1.96388128
  0.93310000   2.51754569
  0.93310000   1.96388103
  0.93310000   2.51754080
  0.93310000   1.96388079
  0.93310000   2.51753634
  0.93310000   1.96388055
  0.93320000   2.51846845
  0.93320000   1.96262434
  0.93320000   2.51845541
  0.93320000   1.96262159
  0.93320000   2.51844255
  0.93320000   1.96262227
  0.93320000   2.51843189
  0.93320000   1.96262185
  0.93320000   2.51842241
  0.93320000   1.96262171
  0.93320000   2.51841410
  0.93320000   1.96262145
  0.93320000   2.51840671
  0.93320000   1.96262120
  0.93320000   2.51840010
  0.93320000   1.96262094
  0.93320000   2.51839416
  0.93320000   1.96262069
  0.93320000   2.51838880
  0.93320000   1.96262044
  0.93320000   2.51838392
  0.93320000   1.96262019
  0.93320000   2.51837947
  0.93320000   1.96261994
  0.93330000   2.51930553
  0.93330000   1.96137186
  0.93330000   2.51929532
  0.93330000   1.96136388
  0.93330000   2.51928169
  0.93330000   1.96136616
  0.93330000   2.51927135
  0.93330000   1.96136522
  0.93330000   2.51926184
  0.93330000   1.96136521
  0.93330000   2.51925359
  0.93330000   1.96136489
  0.93330000   2.51924621
  0.93330000   1.96136465
  0.93330000   2.51923964
  0.93330000   1.96136438
  0.93330000   2.51923372
  0.93330000   1.96136412
  0.93330000   2.51922836
  0.93330000   1.96136386
  0.93330000   2.51922351
  0.93330000   1.96136360
  0.93330000   2.51921907
  0.93330000   1.96136336
  0.93340000   2.52013791
  0.93340000   1.96012561
  0.93340000   2.52013211
  0.93340000   1.96010937
  0.93340000   2.52011718
  0.93340000   1.96011429
  0.93340000   2.52010735
  0.93340000   1.96011247
  0.93340000   2.52009774
  0.93340000   1.96011273
  0.93340000   2.52008957
  0.93340000   1.96011230
  0.93340000   2.52008222
  0.93340000   1.96011208
  0.93340000   2.52007567
  0.93340000   1.96011179
  0.93340000   2.52006977
  0.93340000   1.96011153
  0.93340000   2.52006444
  0.93340000   1.96011126
  0.93340000   2.52005959
  0.93340000   1.96011100
  0.93340000   2.52005517
  0.93340000   1.96011075
  0.93350000   2.52096561
  0.93350000   1.95888557
  0.93350000   2.52096585
  0.93350000   1.95885797
  0.93350000   2.52094904
  0.93350000   1.95886665
  0.93350000   2.52093993
  0.93350000   1.95886355
  0.93350000   2.52093016
  0.93350000   1.95886421
  0.93350000   2.52092210
  0.93350000   1.95886364
  0.93350000   2.52091476
  0.93350000   1.95886345
  0.93350000   2.52090824
  0.93350000   1.95886314
  0.93350000   2.52090237
  0.93350000   1.95886287
  0.93350000   2.52089705
  0.93350000   1.95886260
  0.93350000   2.52089223
  0.93350000   1.95886233
  0.93350000   2.52088782
  0.93350000   1.95886207
  0.93360000   2.52178951
  0.93360000   1.95765008
  0.93360000   2.52179632
  0.93360000   1.95761011
  0.93360000   2.52177737
  0.93360000   1.95762308
  0.93360000   2.52176913
  0.93360000   1.95761845
  0.93360000   2.52175913
  0.93360000   1.95761962
  0.93360000   2.52175122
  0.93360000   1.95761885
  0.93360000   2.52174387
  0.93360000   1.95761872
  0.93360000   2.52173740
  0.93360000   1.95761838
  0.93360000   2.52173154
  0.93360000   1.95761811
  0.93360000   2.52172625
  0.93360000   1.95761783
  0.93360000   2.52172144
  0.93360000   1.95761756
  0.93360000   2.52171705
  0.93360000   1.95761729
  0.93370000   2.52261230
  0.93370000   1.95641397
  0.93370000   2.52262265
  0.93370000   1.95636749
  0.93370000   2.52260252
  0.93370000   1.95638294
  0.93370000   2.52259486
  0.93370000   1.95637733
  0.93370000   2.52258474
  0.93370000   1.95637885
  0.93370000   2.52257694
  0.93370000   1.95637794
  0.93370000   2.52256961
  0.93370000   1.95637784
  0.93370000   2.52256318
  0.93370000   1.95637747
  0.93370000   2.52255734
  0.93370000   1.95637721
  0.93370000   2.52255208
  0.93370000   1.95637691
  0.93370000   2.52254728
  0.93370000   1.95637664
  0.93370000   2.52254291
  0.93370000   1.95637637
  0.93380000   2.52343996
  0.93380000   1.95516574
  0.93380000   2.52344274
  0.93380000   1.95513414
  0.93380000   2.52342526
  0.93380000   1.95514475
  0.93380000   2.52341689
  0.93380000   1.95514067
  0.93380000   2.52340710
  0.93380000   1.95514168
  0.93380000   2.52339928
  0.93380000   1.95514091
  0.93380000   2.52339201
  0.93380000   1.95514076
  0.93380000   2.52338561
  0.93380000   1.95514039
  0.93380000   2.52337980
  0.93380000   1.95514011
  0.93380000   2.52337456
  0.93380000   1.95513981
  0.93380000   2.52336979
  0.93380000   1.95513953
  0.93380000   2.52336543
  0.93380000   1.95513926
  0.93390000   2.52428214
  0.93390000   1.95388675
  0.93390000   2.52425294
  0.93390000   1.95391706
  0.93390000   2.52424697
  0.93390000   1.95390584
  0.93390000   2.52423473
  0.93390000   1.95390940
  0.93390000   2.52422643
  0.93390000   1.95390770
  0.93390000   2.52421818
  0.93390000   1.95390786
  0.93390000   2.52421114
  0.93390000   1.95390737
  0.93390000   2.52420471
  0.93390000   1.95390712
  0.93390000   2.52419896
  0.93390000   1.95390679
  0.93390000   2.52419374
  0.93390000   1.95390650
  0.93390000   2.52418899
  0.93390000   1.95390621
  0.93390000   2.52418465
  0.93390000   1.95390593
  0.93400000   2.52514433
  0.93400000   1.95256625
  0.93400000   2.52505076
  0.93400000   1.95272098
  0.93400000   2.52506872
  0.93400000   1.95266416
  0.93400000   2.52504796
  0.93400000   1.95268434
  0.93400000   2.52504293
  0.93400000   1.95267653
  0.93400000   2.52503360
  0.93400000   1.95267891
  0.93400000   2.52502704
  0.93400000   1.95267759
  0.93400000   2.52502050
  0.93400000   1.95267763
  0.93400000   2.52501485
  0.93400000   1.95267718
  0.93400000   2.52500963
  0.93400000   1.95267693
  0.93400000   2.52500492
  0.93400000   1.95267662
  0.93400000   2.52500060
  0.93400000   1.95267634
  0.93410000   2.52598889
  0.93410000   1.95127630
  0.93410000   2.52584953
  0.93410000   1.95152015
  0.93410000   2.52588569
  0.93410000   1.95142881
  0.93410000   2.52585826
  0.93410000   1.95146220
  0.93410000   2.52585601
  0.93410000   1.95144929
  0.93410000   2.52584576
  0.93410000   1.95145360
  0.93410000   2.52583966
  0.93410000   1.95145153
  0.93410000   2.52583304
  0.93410000   1.95145184
  0.93410000   2.52582748
  0.93410000   1.95145128
  0.93410000   2.52582228
  0.93410000   1.95145106
  0.93410000   2.52581761
  0.93410000   1.95145073
  0.93410000   2.52581331
  0.93410000   1.95145046
  0.93420000   2.52665464
  0.93420000   1.95032663
  0.93420000   2.52671056
  0.93420000   1.95019616
  0.93420000   2.52667436
  0.93420000   1.95024489
  0.93420000   2.52667448
  0.93420000   1.95022578
  0.93420000   2.52666222
  0.93420000   1.95023248
  0.93420000   2.52665593
  0.93420000   1.95022942
  0.93420000   2.52664850
  0.93420000   1.95023008
  0.93420000   2.52664249
  0.93420000   1.95022936
  0.93420000   2.52663680
  0.93420000   1.95022917
  0.93420000   2.52663172
  0.93420000   1.95022880
  0.93420000   2.52662706
  0.93420000   1.95022852
  0.93420000   2.52662281
  0.93420000   1.95022823
  0.93430000   2.52721557
  0.93430000   1.94957268
  0.93430000   2.52760728
  0.93430000   1.94879857
  0.93430000   2.52744262
  0.93430000   1.94909646
  0.93430000   2.52749371
  0.93430000   1.94898012
  0.93430000   2.52746219
  0.93430000   1.94902454
  0.93430000   2.52746376
  0.93430000   1.94900676
  0.93430000   2.52745354
  0.93430000   1.94901312
  0.93430000   2.52744880
  0.93430000   1.94901016
  0.93430000   2.52744275
  0.93430000   1.94901083
  0.93430000   2.52743793
  0.93430000   1.94901012
  0.93430000   2.52743325
  0.93430000   1.94900997
  0.93430000   2.52742908
  0.93430000   1.94900962
  0.93440000   2.52878819
  0.93440000   1.94684818
  0.93440000   2.52809336
  0.93440000   1.94818081
  0.93440000   2.52836233
  0.93440000   1.94764846
  0.93440000   2.52824622
  0.93440000   1.94785715
  0.93440000   2.52828192
  0.93440000   1.94777370
  0.93440000   2.52825806
  0.93440000   1.94780598
  0.93440000   2.52825844
  0.93440000   1.94779262
  0.93440000   2.52824997
  0.93440000   1.94779736
  0.93440000   2.52824570
  0.93440000   1.94779499
  0.93440000   2.52824042
  0.93440000   1.94779546
  0.93440000   2.52823611
  0.93440000   1.94779483
  0.93440000   2.52823193
  0.93440000   1.94779466
  0.93450000   2.04312121
  0.93450000   2.52999555
  0.93450000   1.94406551
  0.93450000   2.52845768
  0.93450000   1.94769586
  0.93450000   2.52928095
  0.93450000   1.94615648
  0.93450000   2.52896847
  0.93450000   1.94676394
  0.93450000   2.52909455
  0.93450000   1.94651543
  0.93450000   2.52903911
  0.93450000   1.94661402
  0.93450000   2.52905545
  0.93450000   1.94657332
  0.93450000   2.52904256
  0.93450000   1.94658902
  0.93450000   2.52904156
  0.93450000   1.94658211
  0.93450000   2.52903605
  0.93450000   1.94658438
  0.93450000   2.52903269
  0.93450000   1.94658300
  0.93450000   2.52902881
  0.93460000   1.94392273
  0.93460000   2.52958091
  0.93460000   1.94598924
  0.93460000   2.53001744
  0.93460000   1.94513061
  0.93460000   2.52982705
  0.93460000   1.94548119
  0.93460000   2.52989397
  0.93460000   1.94533599
  0.93460000   2.52985574
  0.93460000   1.94539494
  0.93460000   2.52986160
  0.93460000   1.94537009
  0.93460000   2.52985019
  0.93460000   1.94537974
  0.93460000   2.52984668
  0.93460000   1.94537524
  0.93460000   2.52984065
  0.93460000   1.94537659
  0.93460000   2.52983631
  0.93460000   1.94537556
  0.93460000   2.52983185
  0.93460000   1.94537554
  0.93460000   2.52982794
  0.93470000   1.94482537
  0.93470000   2.53083719
  0.93470000   1.94390507
  0.93470000   2.53062800
  0.93470000   1.94428821
  0.93470000   2.53070171
  0.93470000   1.94412660
  0.93470000   2.53065800
  0.93470000   1.94419357
  0.93470000   2.53066473
  0.93470000   1.94416488
  0.93470000   2.53065149
  0.93470000   1.94417631
  0.93470000   2.53064764
  0.93470000   1.94417097
  0.93470000   2.53064077
  0.93470000   1.94417268
  0.93470000   2.53063596
  0.93470000   1.94417146
  0.93470000   2.53063098
  0.93470000   1.94417149
  0.93470000   2.53062667
  0.93470000   1.94417103
  0.93470000   2.53062262
  0.93480000   1.94338727
  0.93480000   2.53158192
  0.93480000   1.94279886
  0.93480000   2.53144102
  0.93480000   1.94304863
  0.93480000   2.53148617
  0.93480000   1.94294120
  0.93480000   2.53145347
  0.93480000   1.94298638
  0.93480000   2.53145544
  0.93480000   1.94296648
  0.93480000   2.53144389
  0.93480000   1.94297439
  0.93480000   2.53143922
  0.93480000   1.94297046
  0.93480000   2.53143257
  0.93480000   1.94297160
  0.93480000   2.53142759
  0.93480000   1.94297060
  0.93480000   2.53142262
  0.93480000   1.94297055
  0.93480000   2.53141827
  0.93480000   1.94297011
  0.93480000   2.53141420
  0.93490000   1.94137540
  0.93490000   2.53219033
  0.93490000   1.94195196
  0.93490000   2.53230852
  0.93490000   1.94170007
  0.93490000   2.53224160
  0.93490000   1.94180878
  0.93490000   2.53225689
  0.93490000   1.94176088
  0.93490000   2.53223801
  0.93490000   1.94178108
  0.93490000   2.53223532
  0.93490000   1.94177171
  0.93490000   2.53222675
  0.93490000   1.94177522
  0.93490000   2.53222172
  0.93490000   1.94177315
  0.93490000   2.53221600
  0.93490000   1.94177353
  0.93490000   2.53221131
  0.93490000   1.94177287
  0.93490000   2.53220681
  0.93490000   1.94177268
  0.93490000   2.53220279
  0.93500000   1.94015294
  0.93500000   2.53296869
  0.93500000   1.94077357
  0.93500000   2.53309892
  0.93500000   1.94049769
  0.93500000   2.53302537
  0.93500000   1.94061898
  0.93500000   2.53304385
  0.93500000   1.94056466
  0.93500000   2.53302326
  0.93500000   1.94058806
  0.93500000   2.53302133
  0.93500000   1.94057711
  0.93500000   2.53301233
  0.93500000   1.94058138
  0.93500000   2.53300747
  0.93500000   1.94057894
  0.93500000   2.53300164
  0.93500000   1.94057949
  0.93500000   2.53299699
  0.93500000   1.94057874
  0.93500000   2.53299246
  0.93500000   1.94057859
  0.93500000   2.53298844
  0.93510000   1.93928089
  0.93510000   2.53382476
  0.93510000   1.93944206
  0.93510000   2.53385007
  0.93510000   1.93936877
  0.93510000   2.53382239
  0.93510000   1.93940109
  0.93510000   2.53382058
  0.93510000   1.93938589
  0.93510000   2.53380882
  0.93510000   1.93939210
  0.93510000   2.53380296
  0.93510000   1.93938870
  0.93510000   2.53379565
  0.93510000   1.93938964
  0.93510000   2.53379002
  0.93510000   1.93938866
  0.93510000   2.53378451
  0.93510000   1.93938856
  0.93510000   2.53377970
  0.93510000   1.93938809
  0.93510000   2.53377523
  0.93510000   1.93938782
  0.93510000   2.53377118
  0.93520000   1.93838857
  0.93520000   2.53467431
  0.93520000   1.93812049
  0.93520000   2.53459865
  0.93520000   1.93824249
  0.93520000   2.53461679
  0.93520000   1.93818594
  0.93520000   2.53459404
  0.93520000   1.93821117
  0.93520000   2.53459175
  0.93520000   1.93819898
  0.93520000   2.53458155
  0.93520000   1.93820394
  0.93520000   2.53457619
  0.93520000   1.93820107
  0.93520000   2.53456966
  0.93520000   1.93820181
  0.93520000   2.53456455
  0.93520000   1.93820092
  0.93520000   2.53455955
  0.93520000   1.93820081
  0.93520000   2.53455516
  0.93520000   1.93820036
  0.93520000   2.53455107
  0.93530000   1.93735023
  0.93530000   2.53548722
  0.93530000   1.93686743
  0.93530000   2.53535896
  0.93530000   1.93709129
  0.93530000   2.53540200
  0.93530000   1.93698630
  0.93530000   2.53536738
  0.93530000   1.93703451
  0.93530000   2.53537068
  0.93530000   1.93701141
  0.93530000   2.53535780
  0.93530000   1.93702153
  0.93530000   2.53535370
  0.93530000   1.93701620
  0.93530000   2.53534656
  0.93530000   1.93701810
  0.93530000   2.53534173
  0.93530000   1.93701666
  0.93530000   2.53533660
  0.93530000   1.93701680
  0.93530000   2.53533227
  0.93530000   1.93701623
  0.93530000   2.53532815
  0.93540000   1.93617116
  0.93540000   2.53626340
  0.93540000   1.93568332
  0.93540000   2.53613198
  0.93540000   1.93591329
  0.93540000   2.53617732
  0.93540000   1.93580367
  0.93540000   2.53614115
  0.93540000   1.93585486
  0.93540000   2.53614535
  0.93540000   1.93582996
  0.93540000   2.53613193
  0.93540000   1.93584110
  0.93540000   2.53612811
  0.93540000   1.93583520
  0.93540000   2.53612081
  0.93540000   1.93583739
  0.93540000   2.53611607
  0.93540000   1.93583579
  0.93540000   2.53611089
  0.93540000   1.93583601
  0.93540000   2.53610658
  0.93540000   1.93583539
  0.93540000   2.53610245
  0.93550000   1.93489504
  0.93550000   2.53701201
  0.93550000   1.93455050
  0.93550000   2.53691412
  0.93550000   1.93471542
  0.93550000   2.53694417
  0.93550000   1.93463535
  0.93550000   2.53691487
  0.93550000   1.93467316
  0.93550000   2.53691595
  0.93550000   1.93465429
  0.93550000   2.53690393
  0.93550000   1.93466270
  0.93550000   2.53689948
  0.93550000   1.93465802
  0.93550000   2.53689246
  0.93550000   1.93465967
  0.93550000   2.53688758
  0.93550000   1.93465830
  0.93550000   2.53688246
  0.93550000   1.93465840
  0.93550000   2.53687814
  0.93550000   1.93465783
  0.93550000   2.53687402
  0.93560000   1.93357184
  0.93560000   2.53774444
  0.93560000   1.93344703
  0.93560000   2.53770043
  0.93560000   1.93350731
  0.93560000   2.53770473
  0.93560000   1.93347713
  0.93560000   2.53768768
  0.93560000   1.93349117
  0.93560000   2.53768290
  0.93560000   1.93348362
  0.93560000   2.53767366
  0.93560000   1.93348663
  0.93560000   2.53766788
  0.93560000   1.93348451
  0.93560000   2.53766149
  0.93560000   1.93348493
  0.93560000   2.53765632
  0.93560000   1.93348414
  0.93560000   2.53765134
  0.93560000   1.93348396
  0.93560000   2.53764695
  0.93560000   1.93348352
  0.93560000   2.53764287
  0.93570000   1.93224408
  0.93570000   2.53847094
  0.93570000   1.93235306
  0.93570000   2.53848616
  0.93570000   1.93229823
  0.93570000   2.53846126
  0.93570000   1.93232471
  0.93570000   2.53845856
  0.93570000   1.93231084
  0.93570000   2.53844671
  0.93570000   1.93231701
  0.93570000   2.53844095
  0.93570000   1.93231326
  0.93570000   2.53843346
  0.93570000   1.93231446
  0.93570000   2.53842791
  0.93570000   1.93231324
  0.93570000   2.53842233
  0.93570000   1.93231325
  0.93570000   2.53841756
  0.93570000   1.93231267
  0.93570000   2.53841307
  0.93570000   1.93231242
  0.93570000   2.53840903
  0.93580000   1.93094002
  0.93580000   2.53919883
  0.93580000   1.93125443
  0.93580000   2.53926774
  0.93580000   1.93109511
  0.93580000   2.53921556
  0.93580000   1.93117463
  0.93580000   2.53922670
  0.93580000   1.93113380
  0.93580000   2.53920782
  0.93580000   1.93115365
  0.93580000   2.53920563
  0.93580000   1.93114294
  0.93580000   2.53919633
  0.93580000   1.93114766
  0.93580000   2.53919170
  0.93580000   1.93114465
  0.93580000   2.53918566
  0.93580000   1.93114556
  0.93580000   2.53918113
  0.93580000   1.93114452
  0.93580000   2.53917652
  0.93580000   1.93114450
  0.93580000   2.53917255
  0.93590000   1.92967457
  0.93590000   2.53993235
  0.93590000   1.93014292
  0.93590000   2.54004298
  0.93590000   1.92990228
  0.93590000   2.53996884
  0.93590000   1.93002455
  0.93590000   2.53999153
  0.93590000   1.92996123
  0.93590000   2.53996658
  0.93590000   1.92999287
  0.93590000   2.53996757
  0.93590000   1.92997597
  0.93590000   2.53995660
  0.93590000   1.92998393
  0.93590000   2.53995285
  0.93590000   1.92997921
  0.93590000   2.53994635
  0.93590000   1.92998101
  0.93590000   2.53994207
  0.93590000   1.92997950
  0.93590000   2.53993734
  0.93590000   1.92997971
  0.93590000   2.53993344
  0.93600000   1.92845389
  0.93600000   2.54067364
  0.93600000   1.92901435
  0.93600000   2.54081064
  0.93600000   1.92872222
  0.93600000   2.54072187
  0.93600000   1.92887300
  0.93600000   2.54075263
  0.93600000   1.92879392
  0.93600000   2.54072325
  0.93600000   1.92883420
  0.93600000   2.54072667
  0.93600000   1.92881257
  0.93600000   2.54071438
  0.93600000   1.92882310
  0.93600000   2.54071136
  0.93600000   1.92881697
  0.93600000   2.54070447
  0.93600000   1.92881952
  0.93600000   2.54070040
  0.93600000   1.92881760
  0.93600000   2.54069556
  0.93600000   1.92881803
  0.93600000   2.54069173
  0.93610000   1.92727941
  0.93610000   2.54142363
  0.93610000   1.92786693
  0.93610000   2.54157004
  0.93610000   1.92755626
  0.93610000   2.54147517
  0.93610000   1.92771899
  0.93610000   2.54150973
  0.93610000   1.92763246
  0.93610000   2.54147805
  0.93610000   1.92767725
  0.93610000   2.54148284
  0.93610000   1.92765292
  0.93610000   2.54146975
  0.93610000   1.92766502
  0.93610000   2.54146720
  0.93610000   1.92765798
  0.93610000   2.54146005
  0.93610000   1.92766105
  0.93610000   2.54145613
  0.93610000   1.92765882
  0.93610000   2.54145122
  0.93610000   1.92765942
  0.93610000   2.54144743
  0.93620000   1.92614962
  0.93620000   2.54218242
  0.93620000   1.92670044
  0.93620000   2.54232092
  0.93620000   1.92640499
  0.93620000   2.54222906
  0.93620000   1.92656192
  0.93620000   2.54226264
  0.93620000   1.92647725
  0.93620000   2.54223115
  0.93620000   1.92652169
  0.93620000   2.54223602
  0.93620000   1.92649719
  0.93620000   2.54222281
  0.93620000   1.92650955
  0.93620000   2.54222038
  0.93620000   1.92650227
  0.93620000   2.54221315
  0.93620000   1.92650551
  0.93620000   2.54220929
  0.93620000   1.92650316
  0.93620000   2.54220434
  0.93620000   1.92650383
  0.93620000   2.54220059
  0.93630000   1.92506059
  0.93630000   2.54294940
  0.93630000   1.92551607
  0.93630000   2.54306339
  0.93630000   1.92526822
  0.93630000   2.54298366
  0.93630000   1.92540160
  0.93630000   2.54301127
  0.93630000   1.92532849
  0.93630000   2.54298269
  0.93630000   1.92536729
  0.93630000   2.54298617
  0.93630000   1.92534550
  0.93630000   2.54297362
  0.93630000   1.92535657
  0.93630000   2.54297089
  0.93630000   1.92534988
  0.93630000   2.54296380
  0.93630000   1.92535285
  0.93630000   2.54295989
  0.93630000   1.92535062
  0.93630000   2.54295497
  0.93630000   1.92535123
  0.93630000   2.54295121
  0.93640000   1.92400619
  0.93640000   2.54372327
  0.93640000   1.92431635
  0.93640000   2.54379795
  0.93640000   1.92414501
  0.93640000   2.54373884
  0.93640000   1.92423824
  0.93640000   2.54375565
  0.93640000   1.92418618
  0.93640000   2.54373273
  0.93640000   1.92421395
  0.93640000   2.54373325
  0.93640000   1.92419792
  0.93640000   2.54372226
  0.93640000   1.92420597
  0.93640000   2.54371873
  0.93640000   1.92420084
  0.93640000   2.54371206
  0.93640000   1.92420299
  0.93640000   2.54370794
  0.93640000   1.92420118
  0.93640000   2.54370314
  0.93640000   1.92420158
  0.93640000   2.54369932
  0.93650000   1.92297874
  0.93650000   2.54450218
  0.93650000   1.92310488
  0.93650000   2.54452547
  0.93650000   1.92303375
  0.93650000   2.54449431
  0.93650000   1.92307247
  0.93650000   2.54449591
  0.93650000   1.92305005
  0.93650000   2.54448127
  0.93650000   1.92306170
  0.93650000   2.54447731
  0.93650000   1.92305442
  0.93650000   2.54446876
  0.93650000   1.92305772
  0.93650000   2.54446391
  0.93650000   1.92305516
  0.93650000   2.54445797
  0.93650000   1.92305591
  0.93650000   2.54445346
  0.93650000   1.92305485
  0.93650000   2.54444887
  0.93650000   1.92305483
  0.93650000   2.54444495
  0.93660000   1.92196988
  0.93660000   2.54528397
  0.93660000   1.92188587
  0.93660000   2.54524702
  0.93660000   1.92193237
  0.93660000   2.54524958
  0.93660000   1.92190524
  0.93660000   2.54523232
  0.93660000   1.92191967
  0.93660000   2.54522824
  0.93660000   1.92191068
  0.93660000   2.54521838
  0.93660000   1.92191494
  0.93660000   2.54521314
  0.93660000   1.92191177
  0.93660000   2.54520645
  0.93660000   1.92191283
  0.93660000   2.54520155
  0.93660000   1.92191154
  0.93660000   2.54519647
  0.93660000   1.92191162
  0.93660000   2.54519221
  0.93660000   1.92191096
  0.93660000   2.54518811
  0.93670000   1.92097149
  0.93670000   2.54606645
  0.93670000   1.92066362
  0.93670000   2.54596377
  0.93670000   1.92083863
  0.93670000   2.54600411
  0.93670000   1.92073763
  0.93670000   2.54596516
  0.93670000   1.92079446
  0.93670000   2.54597355
  0.93670000   1.92076111
  0.93670000   2.54595654
  0.93670000   1.92077935
  0.93670000   2.54595542
  0.93670000   1.92076815
  0.93670000   2.54594637
  0.93670000   1.92077381
  0.93670000   2.54594283
  0.93670000   1.92076987
  0.93670000   2.54593698
  0.93670000   1.92077146
  0.93670000   2.54593317
  0.93670000   1.92076993
  0.93670000   2.54592883
  0.93680000   1.91997631
  0.93680000   2.54684759
  0.93680000   1.91944213
  0.93680000   2.54667686
  0.93680000   1.91975029
  0.93680000   2.54675732
  0.93680000   1.91957081
  0.93680000   2.54669479
  0.93680000   1.91967379
  0.93680000   2.54671707
  0.93680000   1.91961328
  0.93680000   2.54669190
  0.93680000   1.91964747
  0.93680000   2.54669558
  0.93680000   1.91962688
  0.93680000   2.54668373
  0.93680000   1.91963806
  0.93680000   2.54668185
  0.93680000   1.91963088
  0.93680000   2.54667503
  0.93680000   1.91963437
  0.93680000   2.54667180
  0.93680000   1.91963172
  0.93680000   2.54666712
  0.93690000   1.91897820
  0.93690000   2.54762557
  0.93690000   1.91822497
  0.93690000   2.54738739
  0.93690000   1.91866528
  0.93690000   2.54750864
  0.93690000   1.91840590
  0.93690000   2.54742154
  0.93690000   1.91855702
  0.93690000   2.54745864
  0.93690000   1.91846749
  0.93690000   2.54742457
  0.93690000   1.91851913
  0.93690000   2.54743362
  0.93690000   1.91848804
  0.93690000   2.54741855
  0.93690000   1.91850551
  0.93690000   2.54741861
  0.93690000   1.91849455
  0.93690000   2.54741064
  0.93690000   1.91850030
  0.93690000   2.54740811
  0.93690000   1.91849630
  0.93690000   2.54740302
  0.93700000   1.91797202
  0.93700000   2.54839883
  0.93700000   1.91701523
  0.93700000   2.54809635
  0.93700000   1.91758166
  0.93700000   2.54825752
  0.93700000   1.91724401
  0.93700000   2.54814578
  0.93700000   1.91744347
  0.93700000   2.54819810
  0.93700000   1.91732409
  0.93700000   2.54815467
  0.93700000   1.91739409
  0.93700000   2.54816949
  0.93700000   1.91735171
  0.93700000   2.54815089
  0.93700000   1.91737610
  0.93700000   2.54815312
  0.93700000   1.91736089
  0.93700000   2.54814383
  0.93700000   1.91736924
  0.93700000   2.54814212
  0.93700000   1.91736364
  0.93700000   2.54813654
  0.93710000   1.91695333
  0.93710000   2.54916594
  0.93710000   1.91581575
  0.93710000   2.54880471
  0.93710000   1.91649759
  0.93710000   2.54900341
  0.93710000   1.91608624
  0.93710000   2.54886787
  0.93710000   1.91633242
  0.93710000   2.54893527
  0.93710000   1.91618346
  0.93710000   2.54888235
  0.93710000   1.91627210
  0.93710000   2.54890315
  0.93710000   1.91621798
  0.93710000   2.54888081
  0.93710000   1.91624973
  0.93710000   2.54888540
  0.93710000   1.91622991
  0.93710000   2.54887465
  0.93710000   1.91624113
  0.93710000   2.54887385
  0.93710000   1.91623374
  0.93710000   2.54886771
  0.93720000   1.91591816
  0.93720000   2.54992556
  0.93720000   1.91462920
  0.93720000   2.54951341
  0.93720000   1.91541120
  0.93720000   2.54974573
  0.93720000   1.91493376
  0.93720000   2.54958823
  0.93720000   1.91522311
  0.93720000   2.54966994
  0.93720000   1.91504603
  0.93720000   2.54960778
  0.93720000   1.91515286
  0.93720000   2.54963455
  0.93720000   1.91508701
  0.93720000   2.54960839
  0.93720000   1.91512628
  0.93720000   2.54961543
  0.93720000   1.91510165
  0.93720000   2.54960313
  0.93720000   1.91511593
  0.93720000   2.54960333
  0.93720000   1.91510658
  0.93720000   2.54959656
  0.93730000   1.91486269
  0.93730000   2.55067634
  0.93730000   1.91345826
  0.93730000   2.55022344
  0.93730000   1.91432056
  0.93730000   2.55048385
  0.93730000   1.91378782
  0.93730000   2.55030732
  0.93730000   1.91411466
  0.93730000   2.55040186
  0.93730000   1.91391235
  0.93730000   2.55033115
  0.93730000   1.91403599
  0.93730000   2.55036360
  0.93730000   1.91395900
  0.93730000   2.55033371
  0.93730000   1.91400559
  0.93730000   2.55034321
  0.93730000   1.91397615
  0.93730000   2.55032931
  0.93730000   1.91399357
  0.93730000   2.55033056
  0.93730000   1.91398218
  0.93730000   2.55032313
  0.93740000   1.91378319
  0.93740000   2.55141690
  0.93740000   1.91230568
  0.93740000   2.55093588
  0.93740000   1.91322361
  0.93740000   2.55121707
  0.93740000   1.91264982
  0.93740000   2.55102564
  0.93740000   1.91300608
  0.93740000   2.55113071
  0.93740000   1.91278303
  0.93740000   2.55105271
  0.93740000   1.91292105
  0.93740000   2.55109017
  0.93740000   1.91283418
  0.93740000   2.55105689
  0.93740000   1.91288748
  0.93740000   2.55106869
  0.93740000   1.91285351
  0.93740000   2.55105326
  0.93740000   1.91287395
  0.93740000   2.55105554
  0.93740000   1.91286054
  0.93740000   2.55104743
  0.93750000   1.91267609
  0.93750000   2.55214586
  0.93750000   1.91117421
  0.93750000   2.55165180
  0.93750000   1.91211822
  0.93750000   2.55194465
  0.93750000   1.91152127
  0.93750000   2.55174377
  0.93750000   1.91189628
  0.93750000   2.55185614
  0.93750000   1.91165879
  0.93750000   2.55177273
  0.93750000   1.91180751
  0.93750000   2.55181413
  0.93750000   1.91171288
  0.93750000   2.55177806
  0.93750000   1.91177170
  0.93750000   2.55179183
  0.93750000   1.91173385
  0.93750000   2.55177505
  0.93750000   1.91175698
  0.93750000   2.55177826
  0.93750000   1.91174172
  0.93750000   2.55176952
  0.93760000   1.91153809
  0.93760000   2.55286188
  0.93760000   1.91006656
  0.93760000   2.55237233
  0.93760000   1.91100221
  0.93760000   2.55266580
  0.93760000   1.91040376
  0.93760000   2.55246233
  0.93760000   1.91078404
  0.93760000   2.55257775
  0.93760000   1.91054045
  0.93760000   2.55249153
  0.93760000   1.91069478
  0.93760000   2.55253529
  0.93760000   1.91059548
  0.93760000   2.55249738
  0.93760000   1.91065794
  0.93760000   2.55251255
  0.93760000   1.91061734
  0.93760000   2.55249475
  0.93760000   1.91064249
  0.93760000   2.55249871
  0.93760000   1.91062576
  0.93760000   2.55248945
  0.93770000   1.91036641
  0.93770000   2.55356371
  0.93770000   1.90898522
  0.93770000   2.55309852
  0.93770000   1.90987348
  0.93770000   2.55337970
  0.93770000   1.90929888
  0.93770000   2.55318196
  0.93770000   1.90966812
  0.93770000   2.55329510
  0.93770000   1.90942889
  0.93770000   2.55320947
  0.93770000   1.90958216
  0.93770000   2.55325344
  0.93770000   1.90948242
  0.93770000   2.55321504
  0.93770000   1.90954588
  0.93770000   2.55323076
  0.93770000   1.90950417
  0.93770000   2.55321247
  0.93770000   1.90953032
  0.93770000   2.55321686
  0.93770000   1.90951276
  0.93770000   2.55320727
  0.93780000   1.90915903
  0.93780000   2.55425031
  0.93780000   1.90793230
  0.93780000   2.55383136
  0.93780000   1.90873011
  0.93780000   2.55408560
  0.93780000   1.90820820
  0.93780000   2.55390330
  0.93780000   1.90854726
  0.93780000   2.55400774
  0.93780000   1.90832505
  0.93780000   2.55392692
  0.93780000   1.90846894
  0.93780000   2.55396833
  0.93780000   1.90837420
  0.93780000   2.55393125
  0.93780000   1.90843511
  0.93780000   2.55394636
  0.93780000   1.90839460
  0.93780000   2.55392832
  0.93780000   1.90842026
  0.93780000   2.55393265
  0.93780000   1.90840282
  0.93780000   2.55392305
  0.93790000   1.90791488
  0.93790000   2.55492090
  0.93790000   1.90690937
  0.93790000   2.55457166
  0.93790000   1.90757050
  0.93790000   2.55478279
  0.93790000   1.90713311
  0.93790000   2.55462699
  0.93790000   1.90742025
  0.93790000   2.55471520
  0.93790000   1.90722984
  0.93790000   2.55464428
  0.93790000   1.90735437
  0.93790000   2.55467970
  0.93790000   1.90727135
  0.93790000   2.55464623
  0.93790000   1.90732520
  0.93790000   2.55465921
  0.93790000   1.90728889
  0.93790000   2.55464244
  0.93790000   1.90731207
  0.93790000   2.55464603
  0.93790000   1.90729608
  0.93790000   2.55463686
  0.93800000   1.90663394
  0.93800000   2.55557505
  0.93800000   1.90591737
  0.93800000   2.55532001
  0.93800000   1.90639347
  0.93800000   2.55547070
  0.93800000   1.90607480
  0.93800000   2.55535357
  0.93800000   1.90628601
  0.93800000   2.55541707
  0.93800000   1.90614416
  0.93800000   2.55536193
  0.93800000   1.90623768
  0.93800000   2.55538730
  0.93800000   1.90617442
  0.93800000   2.55536024
  0.93800000   1.90621570
  0.93800000   2.55536915
  0.93800000   1.90618738
  0.93800000   2.55535498
  0.93800000   1.90620548
  0.93800000   2.55535694
  0.93800000   1.90619270
  0.93800000   2.55534881
  0.93810000   1.90531729
  0.93810000   2.55621266
  0.93810000   1.90495652
  0.93810000   2.55607678
  0.93810000   1.90519828
  0.93810000   2.55614888
  0.93810000   1.90503418
  0.93810000   2.55608353
  0.93810000   1.90514358
  0.93810000   2.55611292
  0.93810000   1.90506881
  0.93810000   2.55608026
  0.93810000   1.90511817
  0.93810000   2.55609085
  0.93810000   1.90508398
  0.93810000   2.55607353
  0.93810000   1.90510612
  0.93810000   2.55607604
  0.93810000   1.90509038
  0.93810000   2.55606608
  0.93810000   1.90510021
  0.93810000   2.55606528
  0.93810000   1.90509287
  0.93810000   2.55605897
  0.93820000   1.90396702
  0.93820000   2.55683399
  0.93820000   1.90402637
  0.93820000   2.55684208
  0.93820000   1.90398471
  0.93820000   2.55681705
  0.93820000   1.90401187
  0.93820000   2.55681724
  0.93820000   1.90399224
  0.93820000   2.55680243
  0.93820000   1.90400452
  0.93820000   2.55679960
  0.93820000   1.90399514
  0.93820000   2.55679008
  0.93820000   1.90400057
  0.93820000   2.55678634
  0.93820000   1.90399598
  0.93820000   2.55677970
  0.93820000   1.90399827
  0.93820000   2.55677593
  0.93820000   1.90399593
  0.93820000   2.55677097
  0.93820000   1.90399679
  0.93820000   2.55676747
  0.93830000   1.90258604
  0.93830000   2.55743965
  0.93830000   1.90312581
  0.93830000   2.55761580
  0.93830000   1.90275298
  0.93830000   2.55747507
  0.93830000   1.90300816
  0.93830000   2.55755500
  0.93830000   1.90283142
  0.93830000   2.55748529
  0.93830000   1.90295188
  0.93830000   2.55752029
  0.93830000   1.90286798
  0.93830000   2.55748474
  0.93830000   1.90292472
  0.93830000   2.55749894
  0.93830000   1.90288480
  0.93830000   2.55747996
  0.93830000   1.90291141
  0.93830000   2.55748469
  0.93830000   1.90289232
  0.93830000   2.55747389
  0.93830000   1.90290471
  0.93830000   2.55747443
  0.93840000   1.90117788
  0.93840000   2.55803045
  0.93840000   1.90225325
  0.93840000   2.55839761
  0.93840000   1.90150373
  0.93840000   2.55812294
  0.93840000   1.90202309
  0.93840000   2.55829697
  0.93840000   1.90166078
  0.93840000   2.55816129
  0.93840000   1.90191138
  0.93840000   2.55824260
  0.93840000   1.90173615
  0.93840000   2.55817459
  0.93840000   1.90185692
  0.93840000   2.55821157
  0.93840000   1.90177208
  0.93840000   2.55817664
  0.93840000   1.90183018
  0.93840000   2.55819257
  0.93840000   1.90178901
  0.93840000   2.55817392
  0.93840000   1.90181687
  0.93840000   2.55817997
  0.93850000   1.89974646
  0.93850000   2.55860745
  0.93850000   1.90140668
  0.93850000   2.55918703
  0.93850000   1.90023790
  0.93850000   2.55876081
  0.93850000   1.90105642
  0.93850000   2.55904325
  0.93850000   1.90048015
  0.93850000   2.55883025
  0.93850000   1.90088339
  0.93850000   2.55896680
  0.93850000   1.90059915
  0.93850000   2.55885941
  0.93850000   1.90079764
  0.93850000   2.55892449
  0.93850000   1.90065737
  0.93850000   2.55886955
  0.93850000   1.90075496
  0.93850000   2.55889974
  0.93850000   1.90068565
  0.93850000   2.55887095
  0.93850000   1.90073354
  0.93850000   2.55888423
  0.93860000   1.89829585
  0.93860000   2.55917181
  0.93860000   1.90058385
  0.93860000   2.55998344
  0.93860000   1.89895669
  0.93860000   2.55938890
  0.93860000   1.90010775
  0.93860000   2.55979386
  0.93860000   1.89928949
  0.93860000   2.55949204
  0.93860000   1.89986818
  0.93860000   2.55969308
  0.93860000   1.89945658
  0.93860000   2.55953900
  0.93860000   1.89974732
  0.93860000   2.55963792
  0.93860000   1.89954020
  0.93860000   2.55955850
  0.93860000   1.89968615
  0.93860000   2.55960642
  0.93860000   1.89958185
  0.93860000   2.55956483
  0.93860000   1.89965503
  0.93860000   2.55958737
  0.93870000   1.89683010
  0.93870000   2.55972474
  0.93870000   1.89978239
  0.93870000   2.56078618
  0.93870000   1.89766143
  0.93870000   2.56000751
  0.93870000   1.89917652
  0.93870000   2.56054875
  0.93870000   1.89808890
  0.93870000   2.56014659
  0.93870000   1.89886594
  0.93870000   2.56042165
  0.93870000   1.89830807
  0.93870000   2.56021316
  0.93870000   1.89870636
  0.93870000   2.56035212
  0.93870000   1.89842013
  0.93870000   2.56024332
  0.93870000   1.89862415
  0.93870000   2.56031281
  0.93870000   1.89847722
  0.93870000   2.56025542
  0.93870000   1.89858164
  0.93870000   2.56028954
  0.93880000   1.89535313
  0.93880000   2.56026752
  0.93880000   1.89899987
  0.93880000   2.56159452
  0.93880000   1.89635355
  0.93880000   2.56061699
  0.93880000   1.89826207
  0.93880000   2.56130783
  0.93880000   1.89687856
  0.93880000   2.56079386
  0.93880000   1.89787678
  0.93880000   2.56115266
  0.93880000   1.89715330
  0.93880000   2.56088171
  0.93880000   1.89767513
  0.93880000   2.56106730
  0.93880000   1.89729671
  0.93880000   2.56092380
  0.93880000   1.89756936
  0.93880000   2.56101913
  0.93880000   1.89737136
  0.93880000   2.56094255
  0.93880000   1.89751371
  0.93880000   2.56099093
  0.93890000   1.89386861
  0.93890000   2.56080136
  0.93890000   1.89823386
  0.93890000   2.56240771
  0.93890000   1.89503453
  0.93890000   2.56121776
  0.93890000   1.89736363
  0.93890000   2.56207095
  0.93890000   1.89565877
  0.93890000   2.56143383
  0.93890000   1.89690077
  0.93890000   2.56188625
  0.93890000   1.89599202
  0.93890000   2.56154449
  0.93890000   1.89665400
  0.93890000   2.56178368
  0.93890000   1.89616952
  0.93890000   2.56159975
  0.93890000   1.89652218
  0.93890000   2.56172559
  0.93890000   1.89626383
  0.93890000   2.56162606
  0.93890000   1.89645161
  0.93890000   2.56169172
  0.93900000   1.89238006
  0.93900000   2.56132753
  0.93900000   1.89748196
  0.93900000   2.56322498
  0.93900000   1.89370591
  0.93900000   2.56181024
  0.93900000   1.89648038
  0.93900000   2.56283795
  0.93900000   1.89442987
  0.93900000   2.56206654
  0.93900000   1.89593787
  0.93900000   2.56262253
  0.93900000   1.89482402
  0.93900000   2.56220135
  0.93900000   1.89564329
  0.93900000   2.56250150
  0.93900000   1.89503813
  0.93900000   2.56227098
  0.93900000   1.89548305
  0.93900000   2.56243243
  0.93900000   1.89515420
  0.93900000   2.56230577
  0.93900000   1.89539571
  0.93900000   2.56239210
  0.93910000   1.89089083
  0.93910000   2.56184726
  0.93910000   1.89674172
  0.93910000   2.56404552
  0.93910000   1.89236929
  0.93910000   2.56239494
  0.93910000   1.89561137
  0.93910000   2.56360859
  0.93910000   1.89319232
  0.93910000   2.56269205
  0.93910000   1.89498798
  0.93910000   2.56336159
  0.93910000   1.89364915
  0.93910000   2.56285216
  0.93910000   1.89464328
  0.93910000   2.56322094
  0.93910000   1.89390217
  0.93910000   2.56293730
  0.93910000   1.89445234
  0.93910000   2.56313988
  0.93910000   1.89404203
  0.93910000   2.56298149
  0.93910000   1.89434639
  0.93910000   2.56309229
  0.93920000   1.88940424
  0.93920000   2.56236185
  0.93920000   1.89601060
  0.93920000   2.56486848
  0.93920000   1.89102639
  0.93920000   2.56297240
  0.93920000   1.89475551
  0.93920000   2.56438258
  0.93920000   1.89194672
  0.93920000   2.56331049
  0.93920000   1.89405088
  0.93920000   2.56410343
  0.93920000   1.89246738
  0.93920000   2.56349683
  0.93920000   1.89365418
  0.93920000   2.56394218
  0.93920000   1.89276129
  0.93920000   2.56359852
  0.93920000   1.89343045
  0.93920000   2.56384815
  0.93920000   1.89292690
  0.93920000   2.56365302
  0.93920000   1.89330407
  0.93920000   2.56379250
  0.93930000   1.88792367
  0.93930000   2.56287271
  0.93930000   1.89528587
  0.93930000   2.56569288
  0.93930000   1.88967911
  0.93930000   2.56354332
  0.93930000   1.89391151
  0.93930000   2.56515952
  0.93930000   1.89069385
  0.93930000   2.56392206
  0.93930000   1.89312619
  0.93930000   2.56484804
  0.93930000   1.89127877
  0.93930000   2.56413531
  0.93930000   1.89267612
  0.93930000   2.56466538
  0.93930000   1.89161521
  0.93930000   2.56425449
  0.93930000   1.89241771
  0.93930000   2.56455746
  0.93930000   1.89180840
  0.93930000   2.56432019
  0.93930000   1.89226914
  0.93930000   2.56449296
  0.93940000   1.88645274
  0.93940000   2.56338137
  0.93940000   1.89456447
  0.93940000   2.56651764
  0.93940000   1.88832966
  0.93940000   2.56410850
  0.93940000   1.89307778
  0.93940000   2.56593891
  0.93940000   1.88943472
  0.93940000   2.56452709
  0.93940000   1.89221331
  0.93940000   2.56559529
  0.93940000   1.89008358
  0.93940000   2.56476763
  0.93940000   1.89170907
  0.93940000   2.56539062
  0.93940000   1.89046376
  0.93940000   2.56490508
  0.93940000   1.89141440
  0.93940000   2.56526801
  0.93940000   1.89068615
  0.93940000   2.56498282
  0.93940000   1.89124197
  0.93940000   2.56519386
  0.93950000   1.88499544
  0.93950000   2.56388960
  0.93950000   1.89384294
  0.93950000   2.56734147
  0.93950000   1.88698059
  0.93950000   2.56466894
  0.93950000   1.89225235
  0.93950000   2.56672008
  0.93950000   1.88817069
  0.93950000   2.56512602
  0.93950000   1.89131136
  0.93950000   2.56634493
  0.93950000   1.88888230
  0.93950000   2.56539389
  0.93950000   1.89075283
  0.93950000   2.56611793
  0.93950000   1.88930692
  0.93950000   2.56555023
  0.93950000   1.89042067
  0.93950000   2.56597993
  0.93950000   1.88955989
  0.93950000   2.56564075
  0.93950000   1.89022288
  0.93950000   2.56589542
  0.93960000   1.88355629
  0.93960000   2.56439947
  0.93960000   1.89311719
  0.93960000   2.56816283
  0.93960000   1.88563498
  0.93960000   2.56522590
  0.93960000   1.89143278
  0.93960000   2.56750214
  0.93960000   1.88690351
  0.93960000   2.56571952
  0.93960000   1.89041908
  0.93960000   2.56709657
  0.93960000   1.88767573
  0.93960000   2.56601436
  0.93960000   1.88980693
  0.93960000   2.56684720
  0.93960000   1.88814488
  0.93960000   2.56618995
  0.93960000   1.88943652
  0.93960000   2.56669332
  0.93960000   1.88842946
  0.93960000   2.56629388
  0.93960000   1.88921210
  0.93960000   2.56659779
  0.93970000   1.88214045
  0.93970000   2.56491338
  0.93970000   1.89238247
  0.93970000   2.56897987
  0.93970000   1.88429651
  0.93970000   2.56578092
  0.93970000   1.89061601
  0.93970000   2.56828395
  0.93970000   1.88563545
  0.93970000   2.56630845
  0.93970000   1.88953477
  0.93970000   2.56784962
  0.93970000   1.88646505
  0.93970000   2.56662945
  0.93970000   1.88887057
  0.93970000   2.56757822
  0.93970000   1.88697808
  0.93970000   2.56682437
  0.93970000   1.88846173
  0.93970000   2.56740816
  0.93970000   1.88729486
  0.93970000   2.56694218
  0.93970000   1.88820973
  0.93970000   2.56730110
  0.93980000   1.88075390
  0.93980000   2.56543417
  0.93980000   1.89163316
  0.93980000   2.56979041
  0.93980000   1.88296956
  0.93980000   2.56633591
  0.93980000   1.88979827
  0.93980000   2.56906407
  0.93980000   1.88436940
  0.93980000   2.56689398
  0.93980000   1.88865610
  0.93980000   2.56860322
  0.93980000   1.88525195
  0.93980000   2.56723979
  0.93980000   1.88794252
  0.93980000   2.56831058
  0.93980000   1.88580735
  0.93980000   2.56745377
  0.93980000   1.88749576
  0.93980000   2.56812434
  0.93980000   1.88615636
  0.93980000   2.56758571
  0.93980000   1.88721567
  0.93980000   2.56800538
  0.93990000   1.87940351
  0.93990000   2.56596514
  0.93990000   1.89086269
  0.93990000   2.57059181
  0.93990000   1.88165938
  0.93990000   2.56689321
  0.93990000   1.88897495
  0.93990000   2.56984069
  0.93990000   1.88310898
  0.93990000   2.56747764
  0.93990000   1.88778012
  0.93990000   2.56935626
  0.93990000   1.88403870
  0.93990000   2.56784628
  0.93990000   1.88702101
  0.93990000   2.56904364
  0.93990000   1.88463396
  0.93990000   2.56807861
  0.93990000   1.88653770
  0.93990000   2.56884157
  0.93990000   1.88501454
  0.93990000   2.56822465
  0.93990000   1.88622956
  0.93990000   2.56871057
  0.94000000   1.87809712
  0.94000000   2.56651013
  0.94000000   1.89006343
  0.94000000   2.57138099
  0.94000000   1.88037215
  0.94000000   2.56745563
  0.94000000   1.88814046
  0.94000000   2.57061157
  0.94000000   1.88185865
  0.94000000   2.56806135
  0.94000000   1.88690298
  0.94000000   2.57010723
  0.94000000   1.88282828
  0.94000000   2.56845015
  0.94000000   1.88610362
  0.94000000   2.56977650
  0.94000000   1.88345974
  0.94000000   2.56869963
  0.94000000   1.88558614
  0.94000000   2.56955935
  0.94000000   1.88387042
  0.94000000   2.56885939
  0.94000000   1.88525069
  0.94000000   2.56941644
  0.94010000   1.87684366
  0.94010000   2.56707356
  0.94010000   1.88922661
  0.94010000   2.57215433
  0.94010000   1.87911510
  0.94010000   2.56802652
  0.94010000   1.88728815
  0.94010000   2.57137399
  0.94010000   1.88062385
  0.94010000   2.56864752
  0.94010000   1.88601995
  0.94010000   2.57085421
  0.94010000   1.88162452
  0.94010000   2.56905303
  0.94010000   1.88518715
  0.94010000   2.57050788
  0.94010000   1.88228722
  0.94010000   2.56931785
  0.94010000   1.88463906
  0.94010000   2.57027690
  0.94010000   1.88272552
  0.94010000   2.56949054
  0.94010000   1.88427784
  0.94010000   2.57012257
  0.94020000   1.87565313
  0.94020000   2.56766042
  0.94020000   1.88834229
  0.94020000   2.57290763
  0.94020000   1.87789658
  0.94020000   2.56860984
  0.94020000   1.88641017
  0.94020000   2.57212469
  0.94020000   1.87941109
  0.94020000   2.56923908
  0.94020000   1.88512519
  0.94020000   2.57159481
  0.94020000   1.88043221
  0.94020000   2.56965702
  0.94020000   1.88426744
  0.94020000   2.57123612
  0.94020000   1.88111972
  0.94020000   2.56993470
  0.94020000   1.88369364
  0.94020000   2.57099313
  0.94020000   1.88158206
  0.94020000   2.57011900
  0.94020000   1.88330925
  0.94020000   2.57082828
  0.94030000   1.87453662
  0.94030000   2.56827630
  0.94030000   1.88739932
  0.94030000   2.57363614
  0.94030000   1.87672614
  0.94030000   2.56921016
  0.94030000   1.88549742
  0.94030000   2.57285980
  0.94030000   1.87822810
  0.94030000   2.56983958
  0.94030000   1.88421164
  0.94030000   2.57232606
  0.94030000   1.87925726
  0.94030000   2.57026473
  0.94030000   1.88333929
  0.94030000   2.57195905
  0.94030000   1.87996158
  0.94030000   2.57055205
  0.94030000   1.88274618
  0.94030000   2.57170653
  0.94030000   1.88044306
  0.94030000   2.57074606
  0.94030000   1.88234239
  0.94030000   2.57153257
  0.94040000   1.87350631
  0.94040000   2.56892735
  0.94040000   1.88638541
  0.94040000   2.57433445
  0.94040000   1.87561459
  0.94040000   2.56983270
  0.94040000   1.88453949
  0.94040000   2.57357482
  0.94040000   1.87708385
  0.94040000   2.57045323
  0.94040000   1.88327094
  0.94040000   2.57304440
  0.94040000   1.87810682
  0.94040000   2.57087942
  0.94040000   1.88239625
  0.94040000   2.57267394
  0.94040000   1.87881825
  0.94040000   2.57117230
  0.94040000   1.88179190
  0.94040000   2.57241509
  0.94040000   1.87931250
  0.94040000   2.57137345
  0.94040000   1.88137380
  0.94040000   2.57223402
  0.94050000   1.87257531
  0.94050000   2.56962024
  0.94050000   1.88528726
  0.94050000   2.57499656
  0.94050000   1.87457393
  0.94050000   2.57048337
  0.94050000   1.88352462
  0.94050000   2.57426457
  0.94050000   1.87598872
  0.94050000   2.57108495
  0.94050000   1.88229332
  0.94050000   2.57374555
  0.94050000   1.87698939
  0.94050000   2.57150502
  0.94050000   1.88143051
  0.94050000   2.57337743
  0.94050000   1.87769644
  0.94050000   2.57179851
  0.94050000   1.88082476
  0.94050000   2.57311622
  0.94050000   1.87819556
  0.94050000   2.57200348
  0.94050000   1.88039895
  0.94050000   2.57293072
  0.94060000   1.87175758
  0.94060000   2.57036206
  0.94060000   1.88409068
  0.94060000   2.57561584
  0.94060000   1.87361741
  0.94060000   2.57116867
  0.94060000   1.88243981
  0.94060000   2.57492317
  0.94060000   1.87495447
  0.94060000   2.57174037
  0.94060000   1.88126751
  0.94060000   2.57442451
  0.94060000   1.87591498
  0.94060000   2.57214621
  0.94060000   1.88043274
  0.94060000   2.57406541
  0.94060000   1.87660437
  0.94060000   2.57243443
  0.94060000   1.87983727
  0.94060000   2.57380669
  0.94060000   1.87709873
  0.94060000   2.57263906
  0.94060000   1.87941202
  0.94060000   2.57362015
  0.94070000   1.87106766
  0.94070000   2.57116018
  0.94070000   1.88278095
  0.94070000   2.57618515
  0.94070000   1.87275934
  0.94070000   2.57189571
  0.94070000   1.88127088
  0.94070000   2.57554403
  0.94070000   1.87399428
  0.94070000   2.57242588
  0.94070000   1.88018080
  0.94070000   2.57507552
  0.94070000   1.87489515
  0.94070000   2.57280846
  0.94070000   1.87939202
  0.94070000   2.57473300
  0.94070000   1.87555179
  0.94070000   2.57308462
  0.94070000   1.87882038
  0.94070000   2.57448247
  0.94070000   1.87603004
  0.94070000   2.57328388
  0.94070000   1.87840568
  0.94070000   2.57429910
  0.94080000   1.87052038
  0.94080000   2.57202204
  0.94080000   1.88134312
  0.94080000   2.57669691
  0.94080000   1.87201494
  0.94080000   2.57267203
  0.94080000   1.88000273
  0.94080000   2.57611991
  0.94080000   1.87312263
  0.94080000   2.57314853
  0.94080000   1.87901908
  0.94080000   2.57569199
  0.94080000   1.87394303
  0.94080000   2.57349808
  0.94080000   1.87829581
  0.94080000   2.57537444
  0.94080000   1.87455019
  0.94080000   2.57375448
  0.94080000   1.87776331
  0.94080000   2.57513868
  0.94080000   1.87499922
  0.94080000   2.57394248
  0.94080000   1.87737091
  0.94080000   2.57496352
  0.94090000   1.87013045
  0.94090000   2.57295493
  0.94090000   1.87976258
  0.94090000   2.57714318
  0.94090000   1.87140006
  0.94090000   2.57350547
  0.94090000   1.87861969
  0.94090000   2.57664298
  0.94090000   1.87235522
  0.94090000   2.57391601
  0.94090000   1.87776703
  0.94090000   2.57626657
  0.94090000   1.87307333
  0.94090000   2.57422214
  0.94090000   1.87712996
  0.94090000   2.57598312
  0.94090000   1.87361283
  0.94090000   2.57445032
  0.94090000   1.87665347
  0.94090000   2.57576953
  0.94090000   1.87401789
  0.94090000   2.57462029
  0.94090000   1.87629684
  0.94090000   2.57560845
  0.94100000   1.86991201
  0.94100000   2.57396568
  0.94100000   1.87802560
  0.94100000   2.57751596
  0.94100000   1.87093080
  0.94100000   2.57440392
  0.94100000   1.87710593
  0.94100000   2.57710494
  0.94100000   1.87170866
  0.94100000   2.57473642
  0.94100000   1.87640841
  0.94100000   2.57679122
  0.94100000   1.87230217
  0.94100000   2.57498846
  0.94100000   1.87587885
  0.94100000   2.57655153
  0.94100000   1.87275472
  0.94100000   2.57517935
  0.94100000   1.87547650
  0.94100000   2.57636823
  0.94100000   1.87309959
  0.94100000   2.57532376
  0.94100000   1.87517065
  0.94100000   2.57622794
  0.94110000   1.86987801
  0.94110000   2.57506031
  0.94110000   1.87612005
  0.94110000   2.57780736
  0.94110000   1.87062298
  0.94110000   2.57537503
  0.94110000   1.87544612
  0.94110000   2.57749724
  0.94110000   1.87120010
  0.94110000   2.57561810
  0.94110000   1.87492652
  0.94110000   2.57725728
  0.94110000   1.87164689
  0.94110000   2.57580544
  0.94110000   1.87452568
  0.94110000   2.57707132
  0.94110000   1.87199256
  0.94110000   2.57594959
  0.94110000   1.87421633
  0.94110000   2.57692703
  0.94110000   1.87225987
  0.94110000   2.57606032
  0.94110000   1.87397751
  0.94110000   2.57681493
  0.94120000   1.87003959
  0.94120000   2.57624367
  0.94120000   1.87403611
  0.94120000   2.57800993
  0.94120000   1.87049159
  0.94120000   2.57642584
  0.94120000   1.87362611
  0.94120000   2.57781131
  0.94120000   1.87084674
  0.94120000   2.57656933
  0.94120000   1.87330479
  0.94120000   2.57765570
  0.94120000   1.87112562
  0.94120000   2.57668185
  0.94120000   1.87305292
  0.94120000   2.57753345
  0.94120000   1.87134448
  0.94120000   2.57676979
  0.94120000   1.87285548
  0.94120000   2.57743720
  0.94120000   1.87151617
  0.94120000   2.57683832
  0.94120000   1.87270068
  0.94120000   2.57736127
  0.94130000   1.87040546
  0.94130000   2.57751909
  0.94130000   1.87176705
  0.94130000   2.57811702
  0.94130000   1.87055005
  0.94130000   2.57756239
  0.94130000   1.87163375
  0.94130000   2.57803890
  0.94130000   1.87066517
  0.94130000   2.57759792
  0.94130000   1.87152753
  0.94130000   2.57797730
  0.94130000   1.87075679
  0.94130000   2.57762650
  0.94130000   1.87144291
  0.94130000   2.57792834
  0.94130000   1.87082966
  0.94130000   2.57764918
  0.94130000   1.87137550
  0.94130000   2.57788919
  0.94130000   1.87088760
  0.94130000   2.57766698
  0.94130000   1.87132178
  0.94130000   2.57785775
  0.94140000   1.87098122
  0.94140000   2.57888799
  0.94140000   1.86930986
  0.94140000   2.57812314
  0.94140000   1.87080945
  0.94140000   2.57878927
  0.94140000   1.86945974
  0.94140000   2.57817244
  0.94140000   1.87067061
  0.94140000   2.57871078
  0.94140000   1.86958084
  0.94140000   2.57821310
  0.94140000   1.87055843
  0.94140000   2.57864787
  0.94140000   1.86967864
  0.94140000   2.57824618
  0.94140000   1.87046779
  0.94140000   2.57859714
  0.94140000   1.86975759
  0.94140000   2.57827285
  0.94140000   1.87039455
  0.94140000   2.57855604
  0.94140000   1.86982129
  0.94140000   2.57829420
  0.94150000   1.87176881
  0.94150000   2.58034970
  0.94150000   1.86666584
  0.94150000   2.57802435
  0.94150000   1.87127783
  0.94150000   2.58010923
  0.94150000   1.86709847
  0.94150000   2.57820549
  0.94150000   1.87087609
  0.94150000   2.57991348
  0.94150000   1.86745352
  0.94150000   2.57835474
  0.94150000   1.87054734
  0.94150000   2.57975361
  0.94150000   1.86774473
  0.94150000   2.57847729
  0.94150000   1.87027829
  0.94150000   2.57962277
  0.94150000   1.86798349
  0.94150000   2.57857767
  0.94150000   1.87005808
  0.94150000   2.57951552
  0.94150000   1.86817917
  0.94150000   2.57865973
  0.94160000   1.87276616
  0.94160000   2.58190121
  0.94160000   1.86384083
  0.94160000   2.57781859
  0.94160000   1.87195948
  0.94160000   2.58152287
  0.94160000   1.86454870
  0.94160000   2.57813315
  0.94160000   1.87129155
  0.94160000   2.58120974
  0.94160000   1.86513802
  0.94160000   2.57839498
  0.94160000   1.87073817
  0.94160000   2.58095006
  0.94160000   1.86562847
  0.94160000   2.57861258
  0.94160000   1.87027948
  0.94160000   2.58073441
  0.94160000   1.86603650
  0.94160000   2.57879322
  0.94160000   1.86989912
  0.94160000   2.58055517
  0.94160000   1.86637586
  0.94170000   1.87396692
  0.94170000   2.58353725
  0.94170000   1.86084535
  0.94170000   2.57750597
  0.94170000   1.87285442
  0.94170000   2.58302834
  0.94170000   1.86181398
  0.94170000   2.57795244
  0.94170000   1.87192310
  0.94170000   2.58260106
  0.94170000   1.86263127
  0.94170000   2.57832811
  0.94170000   1.87114248
  0.94170000   2.58224166
  0.94170000   1.86332085
  0.94170000   2.57864404
  0.94170000   1.87048748
  0.94170000   2.58193900
  0.94170000   1.86390263
  0.94170000   2.57890967
  0.94170000   1.86993748
  0.94170000   2.58168395
  0.94170000   1.86439337
  0.94180000   1.87536059
  0.94180000   2.58525038
  0.94180000   1.85769421
  0.94180000   2.57708884
  0.94180000   1.87395811
  0.94180000   2.58462134
  0.94180000   1.85890288
  0.94180000   2.57766265
  0.94180000   1.87277242
  0.94180000   2.58408642
  0.94180000   1.85993525
  0.94180000   2.57815044
  0.94180000   1.87176782
  0.94180000   2.58363056
  0.94180000   1.86081752
  0.94180000   2.57856530
  0.94180000   1.87091522
  0.94180000   2.58324159
  0.94180000   1.86157174
  0.94180000   2.57891830
  0.94180000   1.87019069
  0.94180000   2.58290938
  0.94180000   1.86221660
  0.94190000   1.87693278
  0.94190000   2.58703131
  0.94190000   1.85440598
  0.94190000   2.57657187
  0.94190000   1.87526148
  0.94190000   2.58629519
  0.94190000   1.85582870
  0.94190000   2.57726547
  0.94190000   1.87383632
  0.94190000   2.58566214
  0.94190000   1.85705721
  0.94190000   2.57786062
  0.94190000   1.87261711
  0.94190000   2.58511627
  0.94190000   1.85811940
  0.94190000   2.57837206
  0.94190000   1.87157145
  0.94190000   2.58464473
  0.94190000   1.85903863
  0.94190000   2.57881214
  0.94190000   1.87067289
  0.94190000   2.58423691
  0.94190000   1.85983461
  0.94200000   1.87866582
  0.94200000   2.58886935
  0.94200000   1.85100208
  0.94200000   2.57596183
  0.94200000   1.87675120
  0.94200000   2.58804114
  0.94200000   1.85260894
  0.94200000   2.57676500
  0.94200000   1.87510680
  0.94200000   2.58732205
  0.94200000   1.85400950
  0.94200000   2.57745985
  0.94200000   1.87368815
  0.94200000   2.58669548
  0.94200000   1.85523304
  0.94200000   2.57806254
  0.94200000   1.87245997
  0.94200000   2.58614820
  0.94200000   1.85630370
  0.94200000   2.57858644
  0.94200000   1.87139377
  0.94200000   2.58566933
  0.94200000   1.85724172
  0.94210000   1.88053955
  0.94210000   2.59075288
  0.94210000   1.84750573
  0.94210000   2.57526729
  0.94210000   1.87841037
  0.94210000   2.58984882
  0.94210000   1.84926434
  0.94210000   2.57616763
  0.94210000   1.87657137
  0.94210000   2.58905769
  0.94210000   1.85080901
  0.94210000   2.57695189
  0.94210000   1.87497368
  0.94210000   2.58836220
  0.94210000   1.85217040
  0.94210000   2.57763764
  0.94210000   1.87357922
  0.94210000   2.58774878
  0.94210000   1.85337335
  0.94210000   2.57823914
  0.94210000   1.87235770
  0.94210000   2.58720641
  0.94210000   1.85443837
  0.94220000   1.88253221
  0.94220000   2.59267002
  0.94220000   1.84394085
  0.94220000   2.57449817
  0.94220000   1.88021934
  0.94220000   2.59170683
  0.94220000   1.84581778
  0.94220000   2.57548162
  0.94220000   1.87821370
  0.94220000   2.59085885
  0.94220000   1.84747618
  0.94220000   2.57634287
  0.94220000   1.87646166
  0.94220000   2.59010803
  0.94220000   1.84894828
  0.94220000   2.57710096
  0.94220000   1.87492222
  0.94220000   2.58944036
  0.94220000   1.85025976
  0.94220000   2.57777105
  0.94220000   1.87356328
  0.94220000   2.58884468
  0.94220000   1.85143144
  0.94230000   1.88462148
  0.94230000   2.59460908
  0.94230000   1.84033088
  0.94230000   2.57366524
  0.94230000   1.88215680
  0.94230000   2.59360330
  0.94230000   1.84229305
  0.94230000   2.57471668
  0.94230000   1.88001459
  0.94230000   2.59271419
  0.94230000   1.84403378
  0.94230000   2.57564094
  0.94230000   1.87813605
  0.94230000   2.59192270
  0.94230000   1.84558729
  0.94230000   2.57645863
  0.94230000   1.87647699
  0.94230000   2.59121430
  0.94230000   1.84698028
  0.94230000   2.57718588
  0.94230000   1.87500333
  0.94230000   2.59057760
  0.94230000   1.84823406
  0.94240000   1.88678539
  0.94240000   2.59655908
  0.94240000   1.83669788
  0.94240000   2.57277954
  0.94240000   1.88420080
  0.94240000   2.59552656
  0.94240000   1.83871360
  0.94240000   2.57388339
  0.94240000   1.88195310
  0.94240000   2.59461181
  0.94240000   1.84050567
  0.94240000   2.57485571
  0.94240000   1.87997782
  0.94240000   2.59379467
  0.94240000   1.84211055
  0.94240000   2.57571886
  0.94240000   1.87822731
  0.94240000   2.59305993
  0.94240000   1.84355628
  0.94240000   2.57649005
  0.94240000   1.87666532
  0.94240000   2.59239585
  0.94240000   1.84486486
  0.94250000   1.88900313
  0.94250000   2.59851015
  0.94250000   1.83306175
  0.94250000   2.57185190
  0.94250000   1.88632980
  0.94250000   2.59746561
  0.94250000   1.83510156
  0.94250000   2.57299261
  0.94250000   1.88400762
  0.94250000   2.59653998
  0.94250000   1.83691545
  0.94250000   2.57399772
  0.94250000   1.88196609
  0.94250000   2.59571184
  0.94250000   1.83854237
  0.94250000   2.57489147
  0.94250000   1.88015379
  0.94250000   2.59496524
  0.94250000   1.84001185
  0.94250000   2.57569222
  0.94250000   1.87853217
  0.94250000   2.59428798
  0.94250000   1.84134684
  0.94260000   1.89125580
  0.94260000   2.60045376
  0.94260000   1.82943966
  0.94260000   2.57089252
  0.94260000   1.88852356
  0.94260000   2.59941051
  0.94260000   1.83147693
  0.94260000   2.57205502
  0.94260000   1.88615698
  0.94260000   2.59848756
  0.94260000   1.83328548
  0.94260000   2.57307787
  0.94260000   1.88407926
  0.94260000   2.59766218
  0.94260000   1.83490691
  0.94260000   2.57398724
  0.94260000   1.88223507
  0.94260000   2.59691760
  0.94260000   1.83637240
  0.94260000   2.57480275
  0.94260000   1.88058335
  0.94260000   2.59624110
  0.94260000   1.83770588
  0.94270000   1.89352677
  0.94270000   2.60238285
  0.94270000   1.82584588
  0.94270000   2.56991057
  0.94270000   1.89076374
  0.94270000   2.60135266
  0.94270000   1.82785702
  0.94270000   2.57108061
  0.94270000   1.88838126
  0.94270000   2.60044449
  0.94270000   1.82963604
  0.94270000   2.57210683
  0.94270000   1.88629608
  0.94270000   2.59963426
  0.94270000   1.83122717
  0.94270000   2.57301738
  0.94270000   1.88444890
  0.94270000   2.59890440
  0.94270000   1.83266324
  0.94270000   2.57383311
  0.94270000   1.88279615
  0.94270000   2.59824163
  0.94270000   1.83396928
  0.94280000   1.89580205
  0.94280000   2.60429185
  0.94280000   1.82229164
  0.94280000   2.56891409
  0.94280000   1.89303436
  0.94280000   2.60328493
  0.94280000   1.82425626
  0.94280000   2.57007847
  0.94280000   1.89066242
  0.94280000   2.60240198
  0.94280000   1.82598482
  0.94280000   2.57109472
  0.94280000   1.88859646
  0.94280000   2.60161767
  0.94280000   1.82752412
  0.94280000   2.57199297
  0.94280000   1.88677326
  0.94280000   2.60091360
  0.94280000   1.82890861
  0.94280000   2.57279529
  0.94280000   1.88514678
  0.94280000   2.60027600
  0.94280000   1.83016432
  0.94290000   1.89807030
  0.94290000   2.60617662
  0.94290000   1.81878538
  0.94290000   2.56790979
  0.94290000   1.89532201
  0.94290000   2.60520159
  0.94290000   1.82068619
  0.94290000   2.56905650
  0.94290000   1.89298463
  0.94290000   2.60435264
  0.94290000   1.82234676
  0.94290000   2.57005077
  0.94290000   1.89096201
  0.94290000   2.60360321
  0.94290000   1.82381631
  0.94290000   2.57092460
  0.94290000   1.88918709
  0.94290000   2.60293414
  0.94290000   1.82513079
  0.94290000   2.57170124
  0.94290000   1.88761146
  0.94290000   2.60233120
  0.94290000   1.82631716
  0.94300000   1.90032276
  0.94300000   2.60803426
  0.94300000   1.81533295
  0.94300000   2.56690313
  0.94300000   1.89761578
  0.94300000   2.60709829
  0.94300000   1.81715566
  0.94300000   2.56802148
  0.94300000   1.89533444
  0.94300000   2.60629044
  0.94300000   1.81873403
  0.94300000   2.56898319
  0.94300000   1.89337635
  0.94300000   2.60558300
  0.94300000   1.82011959
  0.94300000   2.56982208
  0.94300000   1.89167081
  0.94300000   2.60495615
  0.94300000   1.82134965
  0.94300000   2.57056253
  0.94300000   1.89016716
  0.94300000   2.60439523
  0.94300000   1.82245199
  0.94310000   1.90255303
  0.94310000   2.60986301
  0.94310000   1.81193803
  0.94310000   2.56589836
  0.94310000   1.89990716
  0.94310000   2.60897186
  0.94310000   1.81367111
  0.94310000   2.56697897
  0.94310000   1.89770070
  0.94310000   2.60821061
  0.94310000   1.81515629
  0.94310000   2.56789912
  0.94310000   1.89582525
  0.94310000   2.60755049
  0.94310000   1.81644723
  0.94310000   2.56869433
  0.94310000   1.89420666
  0.94310000   2.60697107
  0.94310000   1.81758244
  0.94310000   2.56939000
  0.94310000   1.89279223
  0.94310000   2.60645732
  0.94310000   1.81859045
  0.94320000   1.90475684
  0.94320000   2.61166196
  0.94320000   1.80860252
  0.94320000   2.56489867
  0.94320000   1.90218978
  0.94320000   2.61082013
  0.94320000   1.81023698
  0.94320000   2.56593351
  0.94320000   1.90007434
  0.94320000   2.61010949
  0.94320000   1.81162097
  0.94320000   2.56680469
  0.94320000   1.89829646
  0.94320000   2.60950033
  0.94320000   1.81281004
  0.94320000   2.56754930
  0.94320000   1.89677878
  0.94320000   2.60897164
  0.94320000   1.81384379
  0.94320000   2.56819368
  0.94320000   1.89546671
  0.94320000   2.60850812
  0.94320000   1.81475140
  0.94330000   1.90693166
  0.94330000   2.61343091
  0.94330000   1.80532689
  0.94330000   2.56390637
  0.94330000   1.90445901
  0.94330000   2.61264173
  0.94330000   1.80685611
  0.94330000   2.56488874
  0.94330000   1.90244811
  0.94330000   2.61198436
  0.94330000   1.80813362
  0.94330000   2.56570509
  0.94330000   1.90077959
  0.94330000   2.61142822
  0.94330000   1.80921668
  0.94330000   2.56639399
  0.94330000   1.89937316
  0.94330000   2.61095185
  0.94330000   1.81014587
  0.94330000   2.56698260
  0.94330000   1.89817249
  0.94330000   2.61053967
  0.94330000   1.81095086
  0.94340000   1.90907638
  0.94340000   2.61517018
  0.94340000   1.80211060
  0.94340000   2.56292301
  0.94340000   1.90671170
  0.94340000   2.61443590
  0.94340000   1.80353008
  0.94340000   2.56384750
  0.94340000   1.90481627
  0.94340000   2.61383322
  0.94340000   1.80469829
  0.94340000   2.56460472
  0.94340000   1.90326585
  0.94340000   2.61333081
  0.94340000   1.80567400
  0.94340000   2.56523454
  0.94340000   1.90197749
  0.94340000   2.61290680
  0.94340000   1.80649856
  0.94340000   2.56576488
  0.94340000   1.90089335
  0.94340000   2.61254538
  0.94340000   1.80720209
  0.94350000   1.91119098
  0.94350000   2.61688042
  0.94350000   1.79895242
  0.94350000   2.56194962
  0.94350000   1.90894579
  0.94350000   2.61620235
  0.94350000   1.80025958
  0.94350000   2.56281209
  0.94350000   1.90717424
  0.94350000   2.61565469
  0.94350000   1.80131787
  0.94350000   2.56350732
  0.94350000   1.90574773
  0.94350000   2.61520548
  0.94350000   1.80218728
  0.94350000   2.56407633
  0.94350000   1.90458101
  0.94350000   2.61483256
  0.94350000   1.80290977
  0.94350000   2.56454767
  0.94350000   1.90361496
  0.94350000   2.61451997
  0.94350000   1.80351577
  0.94360000   1.91327623
  0.94360000   2.61856251
  0.94360000   1.79585063
  0.94360000   2.56098681
  0.94360000   1.91116005
  0.94360000   2.61794108
  0.94360000   1.79704468
  0.94360000   2.56178433
  0.94360000   1.90951836
  0.94360000   2.61744779
  0.94360000   1.79799435
  0.94360000   2.56241608
  0.94360000   1.90821884
  0.94360000   2.61705026
  0.94360000   1.79876055
  0.94360000   2.56292404
  0.94360000   1.90717433
  0.94360000   2.61672610
  0.94360000   1.79938566
  0.94360000   2.56333722
  0.94360000   1.90632474
  0.94360000   2.61645931
  0.94360000   1.79990020
  0.94370000   1.91533341
  0.94370000   2.62021746
  0.94370000   1.79280333
  0.94370000   2.56003494
  0.94370000   1.91335374
  0.94370000   2.61965229
  0.94370000   1.79388503
  0.94370000   2.56076571
  0.94370000   1.91184559
  0.94370000   2.61921191
  0.94370000   1.79472904
  0.94370000   2.56133376
  0.94370000   1.91067362
  0.94370000   2.61886367
  0.94370000   1.79539682
  0.94370000   2.56178174
  0.94370000   1.90974925
  0.94370000   2.61858513
  0.94370000   1.79593086
  0.94370000   2.56213896
  0.94370000   1.90901180
  0.94370000   2.61836033
  0.94370000   1.79636155
  0.94380000   1.91736409
  0.94380000   2.62184627
  0.94380000   1.78980853
  0.94380000   2.55909419
  0.94380000   1.91552647
  0.94380000   2.62133628
  0.94380000   1.79078005
  0.94380000   2.55975751
  0.94380000   1.91415335
  0.94380000   2.62094667
  0.94380000   1.79152276
  0.94380000   2.56026277
  0.94380000   1.91310721
  0.94380000   2.62064467
  0.94380000   1.79209822
  0.94380000   2.56065297
  0.94380000   1.91229865
  0.94380000   2.62040800
  0.94380000   1.79254869
  0.94380000   2.56095749
  0.94380000   1.91166686
  0.94380000   2.62022092
  0.94380000   1.79290412
  0.94390000   1.91936995
  0.94390000   2.62344995
  0.94390000   1.78686430
  0.94390000   2.55816467
  0.94390000   1.91767800
  0.94390000   2.62299345
  0.94390000   1.78772907
  0.94390000   2.55876087
  0.94390000   1.91643936
  0.94390000   2.62265184
  0.94390000   1.78837597
  0.94390000   2.55920522
  0.94390000   1.91551532
  0.94390000   2.62239257
  0.94390000   1.78886619
  0.94390000   2.55954077
  0.94390000   1.91481637
  0.94390000   2.62219366
  0.94390000   1.78924131
  0.94390000   2.55979667
  0.94390000   1.91428213
  0.94390000   2.62203976
  0.94390000   1.78953054
  0.94400000   1.92135262
  0.94400000   2.62502941
  0.94400000   1.78396883
  0.94400000   2.55724649
  0.94400000   1.91980807
  0.94400000   2.62462417
  0.94400000   1.78473135
  0.94400000   2.55777682
  0.94400000   1.91870152
  0.94400000   2.62432738
  0.94400000   1.78528885
  0.94400000   2.55816302
  0.94400000   1.91789413
  0.94400000   2.62410698
  0.94400000   1.78570153
  0.94400000   2.55844776
  0.94400000   1.91729713
  0.94400000   2.62394154
  0.94400000   1.78600990
  0.94400000   2.55865964
  0.94400000   1.91685123
  0.94400000   2.62381628
  0.94400000   1.78624201
  0.94410000   1.92331359
  0.94410000   2.62658550
  0.94410000   1.78112052
  0.94410000   2.55633980
  0.94410000   1.92191641
  0.94410000   2.62622882
  0.94410000   1.78178617
  0.94410000   2.55680632
  0.94410000   1.92093785
  0.94410000   2.62597333
  0.94410000   1.78226131
  0.94410000   2.55713781
  0.94410000   1.92024025
  0.94410000   2.62578776
  0.94410000   1.78260454
  0.94410000   2.55737612
  0.94410000   1.91973650
  0.94410000   2.62565149
  0.94410000   1.78285476
  0.94410000   2.55754890
  0.94410000   1.91936911
  0.94410000   2.62555048
  0.94410000   1.78303851
  0.94420000   1.92525414
  0.94420000   2.62811895
  0.94420000   1.77831792
  0.94420000   2.55544478
  0.94420000   1.92400259
  0.94420000   2.62780778
  0.94420000   1.77889284
  0.94420000   2.55585030
  0.94420000   1.92314648
  0.94420000   2.62758984
  0.94420000   1.77929310
  0.94420000   2.55613108
  0.94420000   1.92255071
  0.94420000   2.62743502
  0.94420000   1.77957503
  0.94420000   2.55632763
  0.94420000   1.92213083
  0.94420000   2.62732373
  0.94420000   1.77977545
  0.94420000   2.55646633
  0.94420000   1.92183193
  0.94420000   2.62724289
  0.94420000   1.77991901
  0.94430000   1.92717526
  0.94430000   2.62963038
  0.94430000   1.77555980
  0.94430000   2.55456171
  0.94430000   1.92606605
  0.94430000   2.62936138
  0.94430000   1.77605067
  0.94430000   2.55490964
  0.94430000   1.92532560
  0.94430000   2.62917715
  0.94430000   1.77638374
  0.94430000   2.55514409
  0.94430000   1.92482291
  0.94430000   2.62904907
  0.94430000   1.77661239
  0.94430000   2.55530371
  0.94430000   1.92447724
  0.94430000   2.62895883
  0.94430000   1.77677087
  0.94430000   2.55541322
  0.94430000   1.92423700
  0.94430000   2.62889443
  0.94430000   1.77688167
  0.94440000   1.92907768
  0.94440000   2.63112035
  0.94440000   1.77284512
  0.94440000   2.55369091
  0.94440000   1.92810610
  0.94440000   2.63088997
  0.94440000   1.77325902
  0.94440000   2.55398516
  0.94440000   1.92747353
  0.94440000   2.63073560
  0.94440000   1.77353260
  0.94440000   2.55417790
  0.94440000   1.92705467
  0.94440000   2.63063042
  0.94440000   1.77371565
  0.94440000   2.55430541
  0.94440000   1.92677357
  0.94440000   2.63055759
  0.94440000   1.77383943
  0.94440000   2.55439040
  0.94440000   1.92658264
  0.94440000   2.63050636
  0.94440000   1.77392401
  0.94450000   1.93096183
  0.94450000   2.63258930
  0.94450000   1.77017299
  0.94450000   2.55283278
  0.94450000   1.93012192
  0.94450000   2.63239391
  0.94450000   1.77051721
  0.94450000   2.55307763
  0.94450000   1.92958867
  0.94450000   2.63226561
  0.94450000   1.77073886
  0.94450000   2.55323339
  0.94450000   1.92924419
  0.94450000   2.63217971
  0.94450000   1.77088349
  0.94450000   2.55333344
  0.94450000   1.92901832
  0.94450000   2.63212106
  0.94450000   1.77097905
  0.94450000   2.55339821
  0.94450000   1.92886807
  0.94450000   2.63208017
  0.94450000   1.77104305
  0.94460000   1.93282788
  0.94460000   2.63403765
  0.94460000   1.76754264
  0.94460000   2.55198776
  0.94460000   1.93211260
  0.94460000   2.63387354
  0.94460000   1.76782455
  0.94460000   2.55218775
  0.94460000   1.93166961
  0.94460000   2.63376768
  0.94460000   1.76800152
  0.94460000   2.55231121
  0.94460000   1.93139010
  0.94460000   2.63369777
  0.94460000   1.76811431
  0.94460000   2.55238819
  0.94460000   1.93121064
  0.94460000   2.63365043
  0.94460000   1.76818735
  0.94460000   2.55243661
  0.94460000   1.93109331
  0.94460000   2.63361750
  0.94460000   1.76823549
  0.94470000   1.93467574
  0.94470000   2.63546572
  0.94470000   1.76495341
  0.94470000   2.55115633
  0.94470000   1.93407717
  0.94470000   2.63532924
  0.94470000   1.76518030
  0.94470000   2.55131611
  0.94470000   1.93371508
  0.94470000   2.63524240
  0.94470000   1.76531941
  0.94470000   2.55141184
  0.94470000   1.93349140
  0.94470000   2.63518551
  0.94470000   1.76540628
  0.94470000   2.55146980
  0.94470000   1.93335025
  0.94470000   2.63514705
  0.94470000   1.76546167
  0.94470000   2.55150525
  0.94470000   1.93325902
  0.94470000   2.63512013
  0.94470000   1.76549784
  0.94480000   1.93650513
  0.94480000   2.63687384
  0.94480000   1.76240469
  0.94480000   2.55033894
  0.94480000   1.93601465
  0.94480000   2.63676142
  0.94480000   1.76258367
  0.94480000   2.55046322
  0.94480000   1.93572404
  0.94480000   2.63669044
  0.94480000   1.76269121
  0.94480000   2.55053553
  0.94480000   1.93554753
  0.94480000   2.63664396
  0.94480000   1.76275737
  0.94480000   2.55057810
  0.94480000   1.93543736
  0.94480000   2.63661231
  0.94480000   1.76279920
  0.94480000   2.55060349
  0.94480000   1.93536641
  0.94480000   2.63658985
  0.94480000   1.76282651
  0.94490000   1.93831558
  0.94490000   2.63826229
  0.94490000   1.75989592
  0.94490000   2.54953607
  0.94490000   1.93792407
  0.94490000   2.63817053
  0.94490000   1.76003377
  0.94490000   2.54962947
  0.94490000   1.93769567
  0.94490000   2.63811254
  0.94490000   1.76011547
  0.94490000   2.54968237
  0.94490000   1.93755827
  0.94490000   2.63807423
  0.94490000   1.76016538
  0.94490000   2.54971276
  0.94490000   1.93747265
  0.94490000   2.63804770
  0.94490000   1.76019702
  0.94490000   2.54973051
  0.94490000   1.93741710
  0.94490000   2.63802847
  0.94490000   1.76021791
  0.94500000   1.94010650
  0.94500000   2.63963136
  0.94500000   1.75742653
  0.94500000   2.54874815
  0.94500000   1.93980455
  0.94500000   2.63955706
  0.94500000   1.75752964
  0.94500000   2.54881513
  0.94500000   1.93962938
  0.94500000   2.63950951
  0.94500000   1.75759058
  0.94500000   2.54885227
  0.94500000   1.93952376
  0.94500000   2.63947745
  0.94500000   1.75762804
  0.94500000   2.54887322
  0.94500000   1.93945716
  0.94500000   2.63945470
  0.94500000   1.75765217
  0.94500000   2.54888531
  0.94500000   1.93941302
  0.94500000   2.63943777
  0.94500000   1.75766850
  0.94510000   1.94187724
  0.94510000   2.64098136
  0.94510000   1.75499595
  0.94510000   2.54797554
  0.94510000   1.94165529
  0.94510000   2.64092154
  0.94510000   1.75507024
  0.94510000   2.54802035
  0.94510000   1.94152484
  0.94510000   2.64088218
  0.94510000   1.75511486
  0.94510000   2.54804497
  0.94510000   1.94144445
  0.94510000   2.64085481
  0.94510000   1.75514300
  0.94510000   2.54805881
  0.94510000   1.94139221
  0.94510000   2.64083478
  0.94510000   1.75516173
  0.94510000   2.54806680
  0.94510000   1.94135632
  0.94510000   2.64081945
  0.94510000   1.75517488
  0.94520000   1.94362710
  0.94520000   2.64231259
  0.94520000   1.75260355
  0.94520000   2.54721857
  0.94520000   1.94347562
  0.94520000   2.64226453
  0.94520000   1.75265441
  0.94520000   2.54724515
  0.94520000   1.94338196
  0.94520000   2.64223145
  0.94520000   1.75268654
  0.94520000   2.54726010
  0.94520000   1.94332108
  0.94520000   2.64220750
  0.94520000   1.75270789
  0.94520000   2.54726872
  0.94520000   1.94327936
  0.94520000   2.64218938
  0.94520000   1.75272284
  0.94520000   2.54727384
  0.94520000   1.94324928
  0.94520000   2.64217515
  0.94520000   1.75273381
  0.94530000   1.94535537
  0.94530000   2.64362540
  0.94530000   1.75024868
  0.94530000   2.54647749
  0.94530000   1.94526501
  0.94530000   2.64358666
  0.94530000   1.75028097
  0.94530000   2.54648944
  0.94530000   1.94520086
  0.94530000   2.64355825
  0.94530000   1.75030381
  0.94530000   2.54649715
  0.94530000   1.94515460
  0.94530000   2.64353672
  0.94530000   1.75032037
  0.94530000   2.54650208
  0.94530000   1.94512034
  0.94530000   2.64351990
  0.94530000   1.75033273
  0.94530000   2.54650524
  0.94530000   1.94509422
  0.94530000   2.64350642
  0.94530000   1.75034223
  0.94540000   1.94706138
  0.94540000   2.64492013
  0.94540000   1.74793063
  0.94540000   2.54575247
  0.94540000   1.94702309
  0.94540000   2.64488858
  0.94540000   1.74794862
  0.94540000   2.54575305
  0.94540000   1.94698190
  0.94540000   2.64486350
  0.94540000   1.74796482
  0.94540000   2.54575555
  0.94540000   1.94694616
  0.94540000   2.64484361
  0.94540000   1.74797812
  0.94540000   2.54575796
  0.94540000   1.94691697
  0.94540000   2.64482766
  0.94540000   1.74798876
  0.94540000   2.54575983
  0.94540000   1.94689346
  0.94540000   2.64481469
  0.94540000   1.74799727
  0.94550000   1.94874453
  0.94550000   2.64619720
  0.94550000   1.74564862
  0.94550000   2.54504358
  0.94550000   1.94874965
  0.94550000   2.64617094
  0.94550000   1.74565604
  0.94550000   2.54503567
  0.94550000   1.94872563
  0.94550000   2.64614813
  0.94550000   1.74566774
  0.94550000   2.54503462
  0.94550000   1.94869705
  0.94550000   2.64612931
  0.94550000   1.74567891
  0.94550000   2.54503542
  0.94550000   1.94867113
  0.94550000   2.64611394
  0.94550000   1.74568843
  0.94550000   2.54503646
  0.94550000   1.94864929
  0.94550000   2.64610131
  0.94550000   1.74569626
  0.94560000   1.95040427
  0.94560000   2.64745700
  0.94560000   1.74340184
  0.94560000   2.54435084
  0.94560000   1.95044464
  0.94560000   2.64743444
  0.94560000   1.74340187
  0.94560000   2.54433693
  0.94560000   1.95043274
  0.94560000   2.64741307
  0.94560000   1.74341072
  0.94560000   2.54433365
  0.94560000   1.95040868
  0.94560000   2.64739491
  0.94560000   1.74342060
  0.94560000   2.54433349
  0.94560000   1.95038472
  0.94560000   2.64737991
  0.94560000   1.74342939
  0.94560000   2.54433403
  0.94560000   1.95036391
  0.94560000   2.64736752
  0.94560000   1.74343674
  0.94570000   1.95204019
  0.94570000   2.64869999
  0.94570000   1.74118943
  0.94570000   2.54367419
  0.94570000   1.95210815
  0.94570000   2.64867979
  0.94570000   1.74118471
  0.94570000   2.54365641
  0.94570000   1.95210410
  0.94570000   2.64865922
  0.94570000   1.74119198
  0.94570000   2.54365191
  0.94570000   1.95208251
  0.94570000   2.64864143
  0.94570000   1.74120113
  0.94570000   2.54365123
  0.94570000   1.95205958
  0.94570000   2.64862667
  0.94570000   1.74120945
  0.94570000   2.54365146
  0.94570000   1.95203940
  0.94570000   2.64861448
  0.94570000   1.74121644
  0.94580000   1.95365192
  0.94580000   2.64992662
  0.94580000   1.73901046
  0.94580000   2.54301350
  0.94580000   1.95374043
  0.94580000   2.64990769
  0.94580000   1.73900318
  0.94580000   2.54299360
  0.94580000   1.95374065
  0.94580000   2.64988746
  0.94580000   1.73900977
  0.94580000   2.54298863
  0.94580000   1.95372003
  0.94580000   2.64986986
  0.94580000   1.73901856
  0.94580000   2.54298774
  0.94580000   1.95369755
  0.94580000   2.64985528
  0.94580000   1.73902656
  0.94580000   2.54298777
  0.94580000   1.95367776
  0.94580000   2.64984324
  0.94580000   1.73903326
  0.94590000   1.95523924
  0.94590000   2.65113737
  0.94590000   1.73686399
  0.94590000   2.54236855
  0.94590000   1.95534185
  0.94590000   2.65111885
  0.94590000   1.73685589
  0.94590000   2.54234798
  0.94590000   1.95534345
  0.94590000   2.65109864
  0.94590000   1.73686244
  0.94590000   2.54234305
  0.94590000   1.95532273
  0.94590000   2.65108113
  0.94590000   1.73687107
  0.94590000   2.54234212
  0.94590000   1.95530035
  0.94590000   2.65106667
  0.94590000   1.73687882
  0.94590000   2.54234202
  0.94590000   1.95528082
  0.94590000   2.65105477
  0.94590000   1.73688527
  0.94600000   1.95680201
  0.94600000   2.65233274
  0.94600000   1.73474906
  0.94600000   2.54173911
  0.94600000   1.95691288
  0.94600000   2.65231395
  0.94600000   1.73474146
  0.94600000   2.54171897
  0.94600000   1.95691360
  0.94600000   2.65229357
  0.94600000   1.73474836
  0.94600000   2.54171443
  0.94600000   1.95689212
  0.94600000   2.65227609
  0.94600000   1.73475694
  0.94600000   2.54171354
  0.94600000   1.95686965
  0.94600000   2.65226175
  0.94600000   1.73476449
  0.94600000   2.54171334
  0.94600000   1.95685035
  0.94600000   2.65224997
  0.94600000   1.73477070
  0.94610000   1.95834019
  0.94610000   2.65351323
  0.94610000   1.73266467
  0.94610000   2.54112487
  0.94610000   1.95845409
  0.94610000   2.65349368
  0.94610000   1.73265855
  0.94610000   2.54110601
  0.94610000   1.95845224
  0.94610000   2.65347302
  0.94610000   1.73266602
  0.94610000   2.54110203
  0.94610000   1.95842963
  0.94610000   2.65345557
  0.94610000   1.73267459
  0.94610000   2.54110121
  0.94610000   1.95840702
  0.94610000   2.65344133
  0.94610000   1.73268193
  0.94610000   2.54110091
  0.94610000   1.95838793
  0.94610000   2.65342967
  0.94610000   1.73268792
  0.94620000   1.95985383
  0.94620000   2.65467934
  0.94620000   1.73060984
  0.94620000   2.54052550
  0.94620000   1.95996613
  0.94620000   2.65465870
  0.94620000   1.73060585
  0.94620000   2.54050849
  0.94620000   1.95996053
  0.94620000   2.65463773
  0.94620000   1.73061396
  0.94620000   2.54050515
  0.94620000   1.95993665
  0.94620000   2.65462030
  0.94620000   1.73062250
  0.94620000   2.54050438
  0.94620000   1.95991393
  0.94620000   2.65460618
  0.94620000   1.73062964
  0.94620000   2.54050397
  0.94620000   1.95989507
  0.94620000   2.65459464
  0.94620000   1.73063541
  0.94630000   1.96134307
  0.94630000   2.65583157
  0.94630000   1.72858358
  0.94630000   2.53994063
  0.94630000   1.96144972
  0.94630000   2.65580965
  0.94630000   1.72858212
  0.94630000   2.53992584
  0.94630000   1.96143964
  0.94630000   2.65578839
  0.94630000   1.72859084
  0.94630000   2.53992311
  0.94630000   1.96141452
  0.94630000   2.65577100
  0.94630000   1.72859932
  0.94630000   2.53992236
  0.94630000   1.96139177
  0.94630000   2.65575700
  0.94630000   1.72860624
  0.94630000   2.53992183
  0.94630000   1.96137316
  0.94630000   2.65574557
  0.94630000   1.72861180
  0.94640000   1.96280815
  0.94640000   2.65697043
  0.94640000   1.72658489
  0.94640000   2.53936987
  0.94640000   1.96290563
  0.94640000   2.65694715
  0.94640000   1.72658613
  0.94640000   2.53935747
  0.94640000   1.96289071
  0.94640000   2.65692564
  0.94640000   1.72659537
  0.94640000   2.53935527
  0.94640000   1.96286451
  0.94640000   2.65690832
  0.94640000   1.72660373
  0.94640000   2.53935450
  0.94640000   1.96284182
  0.94640000   2.65689444
  0.94640000   1.72661044
  0.94640000   2.53935385
  0.94640000   1.96282347
  0.94640000   2.65688312
  0.94640000   1.72661579
  0.94650000   1.96424937
  0.94650000   2.65809641
  0.94650000   1.72461281
  0.94650000   2.53881282
  0.94650000   1.96433464
  0.94650000   2.65807178
  0.94650000   1.72461673
  0.94650000   2.53880281
  0.94650000   1.96431486
  0.94650000   2.65805010
  0.94650000   1.72462635
  0.94650000   2.53880103
  0.94650000   1.96428783
  0.94650000   2.65803287
  0.94650000   1.72463455
  0.94650000   2.53880020
  0.94650000   1.96426527
  0.94650000   2.65801911
  0.94650000   1.72464103
  0.94650000   2.53879941
  0.94650000   1.96424720
  0.94650000   2.65800789
  0.94650000   1.72464620
  0.94660000   1.96566711
  0.94660000   2.65920999
  0.94660000   1.72266639
  0.94660000   2.53826906
  0.94660000   1.96573757
  0.94660000   2.65918411
  0.94660000   1.72267282
  0.94660000   2.53826132
  0.94660000   1.96571320
  0.94660000   2.65916233
  0.94660000   1.72268267
  0.94660000   2.53825982
  0.94660000   1.96568558
  0.94660000   2.65914521
  0.94660000   1.72269067
  0.94660000   2.53825889
  0.94660000   1.96566324
  0.94660000   2.65913157
  0.94660000   1.72269693
  0.94660000   2.53825796
  0.94660000   1.96564546
  0.94660000   2.65912045
  0.94660000   1.72270191
  0.94670000   1.96706181
  0.94670000   2.66031165
  0.94670000   1.72074471
  0.94670000   2.53773816
  0.94670000   1.96711525
  0.94670000   2.66028467
  0.94670000   1.72075335
  0.94670000   2.53773245
  0.94670000   1.96708676
  0.94670000   2.66026287
  0.94670000   1.72076327
  0.94670000   2.53773111
  0.94670000   1.96705884
  0.94670000   2.66024587
  0.94670000   1.72077105
  0.94670000   2.53773004
  0.94670000   1.96703677
  0.94670000   2.66023235
  0.94670000   1.72077709
  0.94670000   2.53772898
  0.94670000   1.96701927
  0.94670000   2.66022133
  0.94670000   1.72078189
  0.94680000   1.96843400
  0.94680000   2.66140184
  0.94680000   1.71884686
  0.94680000   2.53721971
  0.94680000   1.96846851
  0.94680000   2.66137397
  0.94680000   1.71885732
  0.94680000   2.53721570
  0.94680000   1.96843657
  0.94680000   2.66135221
  0.94680000   1.71886719
  0.94680000   2.53721439
  0.94680000   1.96840858
  0.94680000   2.66133535
  0.94680000   1.71887472
  0.94680000   2.53721318
  0.94680000   1.96838682
  0.94680000   2.66132194
  0.94680000   1.71888055
  0.94680000   2.53721198
  0.94680000   1.96836960
  0.94680000   2.66131101
  0.94680000   1.71888519
  0.94690000   1.96978431
  0.94690000   2.66248101
  0.94690000   1.71697199
  0.94690000   2.53671330
  0.94690000   1.96979816
  0.94690000   2.66245248
  0.94690000   1.71698380
  0.94690000   2.53671059
  0.94690000   1.96976356
  0.94690000   2.66243083
  0.94690000   1.71699349
  0.94690000   2.53670921
  0.94690000   1.96973573
  0.94690000   2.66241410
  0.94690000   1.71700078
  0.94690000   2.53670784
  0.94690000   1.96971429
  0.94690000   2.66240080
  0.94690000   1.71700641
  0.94690000   2.53670651
  0.94690000   1.96969733
  0.94690000   2.66238996
  0.94690000   1.71701089
  0.94700000   1.97111356
  0.94700000   2.66354957
  0.94700000   1.71511927
  0.94700000   2.53621852
  0.94700000   1.97110499
  0.94700000   2.66352067
  0.94700000   1.71513192
  0.94700000   2.53621666
  0.94700000   1.97106867
  0.94700000   2.66349915
  0.94700000   1.71514135
  0.94700000   2.53621513
  0.94700000   1.97104114
  0.94700000   2.66348255
  0.94700000   1.71514839
  0.94700000   2.53621359
  0.94700000   1.97102003
  0.94700000   2.66346935
  0.94700000   1.71515383
  0.94700000   2.53621215
  0.94700000   1.97100332
  0.94700000   2.66345859
  0.94700000   1.71515817
  0.94710000   1.97242293
  0.94710000   2.66460793
  0.94710000   1.71328791
  0.94710000   2.53573499
  0.94710000   1.97238975
  0.94710000   2.66457894
  0.94710000   1.71330083
  0.94710000   2.53573346
  0.94710000   1.97235274
  0.94710000   2.66455758
  0.94710000   1.71330996
  0.94710000   2.53573173
  0.94710000   1.97232561
  0.94710000   2.66454111
  0.94710000   1.71331676
  0.94710000   2.53573005
  0.94710000   1.97230482
  0.94710000   2.66452801
  0.94710000   1.71332202
  0.94710000   2.53572850
  0.94710000   1.97228833
  0.94710000   2.66451732
  0.94710000   1.71332623
  0.94720000   1.97371426
  0.94720000   2.66565643
  0.94720000   1.71147723
  0.94720000   2.53526237
  0.94720000   1.97365310
  0.94720000   2.66562771
  0.94720000   1.71148974
  0.94720000   2.53526059
  0.94720000   1.97361660
  0.94720000   2.66560651
  0.94720000   1.71149856
  0.94720000   2.53525866
  0.94720000   1.97358989
  0.94720000   2.66559016
  0.94720000   1.71150515
  0.94720000   2.53525684
  0.94720000   1.97356939
  0.94720000   2.66557714
  0.94720000   1.71151025
  0.94720000   2.53525518
  0.94720000   1.97355312
  0.94720000   2.66556653
  0.94720000   1.71151432
  0.94730000   1.97499057
  0.94730000   2.66669538
  0.94730000   1.70968663
  0.94730000   2.53480045
  0.94730000   1.97489549
  0.94730000   2.66666736
  0.94730000   1.70969792
  0.94730000   2.53479765
  0.94730000   1.97486104
  0.94730000   2.66664629
  0.94730000   1.70970648
  0.94730000   2.53479556
  0.94730000   1.97483467
  0.94730000   2.66663005
  0.94730000   1.70971286
  0.94730000   2.53479360
  0.94730000   1.97481444
  0.94730000   2.66661712
  0.94730000   1.70971780
  0.94730000   2.53479184
  0.94730000   1.97479838
  0.94730000   2.66660657
  0.94730000   1.70972175
  0.94740000   1.97625689
  0.94740000   2.66772493
  0.94740000   1.70791577
  0.94740000   2.53434917
  0.94740000   1.97611699
  0.94740000   2.66769827
  0.94740000   1.70792463
  0.94740000   2.53434424
  0.94740000   1.97608686
  0.94740000   2.66767725
  0.94740000   1.70793307
  0.94740000   2.53434209
  0.94740000   1.97606058
  0.94740000   2.66766112
  0.94740000   1.70793923
  0.94740000   2.53434000
  0.94740000   1.97604062
  0.94740000   2.66764827
  0.94740000   1.70794403
  0.94740000   2.53433815
  0.94740000   1.97602476
  0.94740000   2.66763779
  0.94740000   1.70794786
  0.94750000   1.97752125
  0.94750000   2.66874504
  0.94750000   1.70616469
  0.94750000   2.53390883
  0.94750000   1.97731694
  0.94750000   2.66872083
  0.94750000   1.70616912
  0.94750000   2.53389992
  0.94750000   1.97729491
  0.94750000   2.66869971
  0.94750000   1.70617771
  0.94750000   2.53389798
  0.94750000   1.97726820
  0.94750000   2.66868370
  0.94750000   1.70618365
  0.94750000   2.53389573
  0.94750000   1.97724856
  0.94750000   2.66867092
  0.94750000   1.70618831
  0.94750000   2.53389380
  0.94750000   1.97723287
  0.94750000   2.66866050
  0.94750000   1.70619203
  0.94760000   1.97879577
  0.94760000   2.66975533
  0.94760000   1.70443409
  0.94760000   2.53348035
  0.94760000   1.97849348
  0.94760000   2.66973549
  0.94760000   1.70443054
  0.94760000   2.53346416
  0.94760000   1.97848628
  0.94760000   2.66971394
  0.94760000   1.70443987
  0.94760000   2.53346296
  0.94760000   1.97845805
  0.94760000   2.66969808
  0.94760000   1.70444552
  0.94760000   2.53346049
  0.94760000   1.97843885
  0.94760000   2.66968537
  0.94760000   1.70445006
  0.94760000   2.53345849
  0.94760000   1.97842331
  0.94760000   2.66967501
  0.94760000   1.70445367
  0.94770000   1.98009712
  0.94770000   2.67075486
  0.94770000   1.70272563
  0.94770000   2.53306553
  0.94770000   1.97964290
  0.94770000   2.67074280
  0.94770000   1.70270785
  0.94770000   2.53303621
  0.94770000   1.97966246
  0.94770000   2.67072016
  0.94770000   1.70271909
  0.94770000   2.53303684
  0.94770000   1.97963047
  0.94770000   2.67070456
  0.94770000   1.70272426
  0.94770000   2.53303398
  0.94770000   1.97961208
  0.94770000   2.67069190
  0.94770000   1.70272872
  0.94770000   2.53303193
  0.94770000   1.97959662
  0.94770000   2.67068160
  0.94770000   1.70273222
  0.94780000   1.98144466
  0.94780000   2.67174214
  0.94780000   1.70104209
  0.94780000   2.53266723
  0.94780000   1.98075932
  0.94780000   2.67174351
  0.94780000   1.70099964
  0.94780000   2.53261499
  0.94780000   1.98082566
  0.94780000   2.67171855
  0.94780000   1.70101506
  0.94780000   2.53261956
  0.94780000   1.98078559
  0.94780000   2.67170345
  0.94780000   1.70101932
  0.94780000   2.53261589
  0.94780000   1.98076885
  0.94780000   2.67169078
  0.94780000   1.70102378
  0.94780000   2.53261389
  0.94780000   1.98075330
  0.94780000   2.67168054
  0.94780000   1.70102716
  0.94790000   1.98285358
  0.94790000   2.67271531
  0.94790000   1.69938694
  0.94790000   2.53228900
  0.94790000   1.98183549
  0.94790000   2.67273856
  0.94790000   1.69930415
  0.94790000   2.53219905
  0.94790000   1.98197883
  0.94790000   2.67270917
  0.94790000   1.69932763
  0.94790000   2.53221119
  0.94790000   1.98192324
  0.94790000   2.67269504
  0.94790000   1.69933010
  0.94790000   2.53220589
  0.94790000   1.98190982
  0.94790000   2.67268225
  0.94790000   1.69933476
  0.94790000   2.53220411
  0.94790000   1.98189382
  0.94790000   2.67267210
  0.94790000   1.69933799
  0.94800000   1.98431762
  0.94800000   2.67367336
  0.94800000   1.69776211
  0.94800000   2.53193298
  0.94800000   1.98286697
  0.94800000   2.67372891
  0.94800000   1.69761961
  0.94800000   2.53178689
  0.94800000   1.98312501
  0.94800000   2.67369200
  0.94800000   1.69765681
  0.94800000   2.53181196
  0.94800000   1.98304294
  0.94800000   2.67367967
  0.94800000   1.69765597
  0.94800000   2.53180360
  0.94800000   1.98303576
  0.94800000   2.67366655
  0.94800000   1.69766122
  0.94800000   2.53180241
  0.94800000   1.98301856
  0.94800000   2.67365652
  0.94800000   1.69766421
  0.94810000   1.98577377
  0.94810000   2.67461950
  0.94810000   1.69616184
  0.94810000   2.53159416
  0.94810000   1.98386404
  0.94810000   2.67471468
  0.94810000   1.69594576
  0.94810000   2.53137840
  0.94810000   1.98426441
  0.94810000   2.67466714
  0.94810000   1.69600241
  0.94810000   2.53142191
  0.94810000   1.98414459
  0.94810000   2.67465763
  0.94810000   1.69599636
  0.94810000   2.53140866
  0.94810000   1.98414740
  0.94810000   2.67464388
  0.94810000   1.69600277
  0.94810000   2.53140859
  0.94810000   1.98412787
  0.94810000   2.67463406
  0.94810000   1.69600537
  0.94820000   1.98703921
  0.94820000   2.67556821
  0.94820000   1.69455944
  0.94820000   2.53124768
  0.94820000   1.98487749
  0.94820000   2.67569300
  0.94820000   1.69428781
  0.94820000   2.53097867
  0.94820000   1.98538667
  0.94820000   2.67563542
  0.94820000   1.69436292
  0.94820000   2.53103979
  0.94820000   1.98523070
  0.94820000   2.67562907
  0.94820000   1.69435099
  0.94820000   2.53102100
  0.94820000   1.98524484
  0.94820000   2.67561445
  0.94820000   1.69435897
  0.94820000   2.53102245
  0.94820000   1.98522220
  0.94820000   2.67560493
  0.94820000   1.69436103
  0.94830000   1.98771150
  0.94830000   2.67655683
  0.94830000   1.69288594
  0.94830000   2.53082830
  0.94830000   1.98604089
  0.94830000   2.67665376
  0.94830000   1.69266440
  0.94830000   2.53060553
  0.94830000   1.98645527
  0.94830000   2.67659991
  0.94830000   1.69273266
  0.94830000   2.53066044
  0.94830000   1.98631187
  0.94830000   2.67659344
  0.94830000   1.69272085
  0.94830000   2.53064172
  0.94830000   1.98632582
  0.94830000   2.67657869
  0.94830000   1.69272906
  0.94830000   2.53064344
  0.94830000   1.98630262
  0.94830000   2.67656931
  0.94830000   1.69273086
  0.94840000   1.98703178
  0.94840000   2.67765465
  0.94840000   1.69101368
  0.94840000   2.53021389
  0.94840000   1.98760445
  0.94840000   2.67757362
  0.94840000   1.69111869
  0.94840000   2.53030038
  0.94840000   1.98738541
  0.94840000   2.67756847
  0.94840000   1.69109711
  0.94840000   2.53027016
  0.94840000   1.98741609
  0.94840000   2.67754854
  0.94840000   1.69111000
  0.94840000   2.53027488
  0.94840000   1.98738203
  0.94840000   2.67753755
  0.94840000   1.69111128
  0.94840000   2.53027004
  0.94840000   1.98737222
  0.94840000   2.67752717
  0.94840000   1.69111490
  0.94850000   1.98373262
  0.94850000   2.67893936
  0.94850000   1.68880222
  0.94850000   2.52926783
  0.94850000   1.98984855
  0.94850000   2.67841652
  0.94850000   1.68971778
  0.94850000   2.53012812
  0.94850000   1.98804418
  0.94850000   2.67855473
  0.94850000   1.68943111
  0.94850000   2.52984493
  0.94850000   1.98859263
  0.94850000   2.67848959
  0.94850000   1.68952729
  0.94850000   2.52992914
  0.94850000   1.98839572
  0.94850000   2.67849299
  0.94850000   1.68950197
  0.94850000   2.52989895
  0.94850000   1.98843780
  0.94850000   2.67847809
  0.94850000   1.68951391
  0.94860000   1.97593473
  0.94860000   2.68036254
  0.94860000   1.68635459
  0.94860000   2.52808453
  0.94860000   1.99258142
  0.94860000   2.67917980
  0.94860000   1.68846757
  0.94860000   2.53009589
  0.94860000   1.98841677
  0.94860000   2.67956336
  0.94860000   1.68772605
  0.94860000   2.52937615
  0.94860000   1.98985918
  0.94860000   2.67941349
  0.94860000   1.68797849
  0.94860000   2.52961037
  0.94860000   1.98935484
  0.94860000   2.67944685
  0.94860000   1.68789773
  0.94860000   2.52952699
  0.94860000   1.98950582
  0.94860000   2.67942151
  0.94860000   1.68792891
  0.94870000   1.96121643
  0.94870000   2.68137776
  0.94870000   1.68472005
  0.94870000   2.52767530
  0.94870000   1.99373491
  0.94870000   2.68008996
  0.94870000   1.68694859
  0.94870000   2.52980255
  0.94870000   1.98932500
  0.94870000   2.68052161
  0.94870000   1.68611619
  0.94870000   2.52899253
  0.94870000   1.99095217
  0.94870000   2.68034517
  0.94870000   1.68641756
  0.94870000   2.52927469
  0.94870000   1.99034925
  0.94870000   2.68039121
  0.94870000   1.68631320
  0.94870000   2.52916831
  0.94870000   1.99054733
  0.94870000   2.68036027
  0.94870000   1.68635471
  0.94880000   1.93703672
  0.94880000   2.68028547
  0.94880000   1.68713307
  0.94880000   2.53116879
  0.94880000   1.98690052
  0.94880000   2.68180762
  0.94880000   1.68394228
  0.94880000   2.52806905
  0.94880000   1.99318666
  0.94880000   2.68116262
  0.94880000   1.68509555
  0.94880000   2.52917189
  0.94880000   1.99089232
  0.94880000   2.68138993
  0.94880000   1.68464989
  0.94880000   2.52873421
  0.94880000   1.99176419
  0.94880000   2.68128499
  0.94880000   1.68482437
  0.94880000   2.52889649
  0.94880000   1.99141154
  0.94880000   2.68131061
  0.94880000   1.68476124
  0.94890000   1.90168089
  0.94890000   2.67369849
  0.94890000   1.70008924
  0.94890000   2.54459845
  0.94890000   1.95968060
  0.94890000   2.68342593
  0.94890000   1.68123523
  0.94890000   2.52661089
  0.94890000   1.99649542
  0.94890000   2.68180033
  0.94890000   1.68408724
  0.94890000   2.52936157
  0.94890000   1.99081238
  0.94890000   2.68243757
  0.94890000   1.68287970
  0.94890000   2.52818450
  0.94890000   1.99319936
  0.94890000   2.68216454
  0.94890000   1.68336434
  0.94890000   2.52864778
  0.94890000   1.99222909
  0.94890000   2.68226106
  0.94890000   1.68316979
  0.94900000   1.85568518
  0.94900000   2.65731548
  0.94900000   1.73217207
  0.94900000   2.57440592
  0.94900000   1.89886018
  0.94900000   2.67395297
  0.94900000   1.69979142
  0.94900000   2.54547467
  0.94900000   1.95813906
  0.94900000   2.68440638
  0.94900000   1.67957243
  0.94900000   2.52614361
  0.94900000   1.99773398
  0.94900000   2.68265124
  0.94900000   1.68265932
  0.94900000   2.52913453
  0.94900000   1.99156151
  0.94900000   2.68338399
  0.94900000   1.68127907
  0.94900000   2.52778683
  0.94900000   1.99430365
  0.94900000   2.68306005
  0.94900000   1.68186116
  0.94910000   1.80314026
  0.94910000   2.62905935
  0.94910000   1.78834273
  0.94910000   2.61912363
  0.94910000   1.80825186
  0.94910000   2.63230767
  0.94910000   1.78181059
  0.94910000   2.61451149
  0.94910000   1.81750633
  0.94910000   2.63799223
  0.94910000   1.77045670
  0.94910000   2.60620670
  0.94910000   1.83426479
  0.94910000   2.64757104
  0.94910000   1.75145993
  0.94910000   2.59148968
  0.94910000   1.86414361
  0.94910000   2.66221209
  0.94910000   1.72272207
  0.94910000   2.56736443
  0.94910000   1.91344695
  0.94910000   2.67896536
  0.94910000   1.69027754
  0.94920000   1.75160262
  0.94920000   2.59281292
  0.94920000   1.86182088
  0.94920000   2.66237443
  0.94920000   1.72273239
  0.94920000   2.56857174
  0.94920000   1.91133773
  0.94920000   2.67959852
  0.94920000   1.68937184
  0.94920000   2.53796222
  0.94920000   1.97413567
  0.94920000   2.68668380
  0.94920000   1.67560572
  0.94920000   2.52456936
  0.94920000   2.00156342
  0.94920000   2.68414037
  0.94920000   1.68023849
  0.94920000   2.52910269
  0.94920000   1.99223017
  0.94920000   2.68538024
  0.94920000   1.67792181
  0.94920000   2.52683070
  0.94920000   1.99687392
  0.94930000   1.70960005
  0.94930000   2.55802845
  0.94930000   1.93329679
  0.94930000   2.68516009
  0.94930000   1.67896712
  0.94930000   2.52906464
  0.94930000   1.99273141
  0.94930000   2.68641795
  0.94930000   1.67625028
  0.94930000   2.52637314
  0.94930000   1.99819313
  0.94930000   2.68568689
  0.94930000   1.67756728
  0.94930000   2.52765820
  0.94930000   1.99552377
  0.94930000   2.68603080
  0.94930000   1.67690815
  0.94930000   2.52700383
  0.94930000   1.99684449
  0.94930000   2.68584310
  0.94930000   1.67723752
  0.94930000   2.52732199
  0.94930000   1.99617293
  0.94940000   1.68268677
  0.94940000   2.53387499
  0.94940000   1.98321079
  0.94940000   2.68837965
  0.94940000   1.67285419
  0.94940000   2.52419174
  0.94940000   2.00301878
  0.94940000   2.68599491
  0.94940000   1.67720379
  0.94940000   2.52847331
  0.94940000   1.99418488
  0.94940000   2.68725076
  0.94940000   1.67485036
  0.94940000   2.52614629
  0.94940000   1.99893638
  0.94940000   2.68659325
  0.94940000   1.67604363
  0.94940000   2.52731656
  0.94940000   1.99651044
  0.94940000   2.68692122
  0.94940000   1.67541961
  0.94940000   2.52669609
  0.94940000   1.99776690
  0.94950000   1.67087135
  0.94950000   2.52340330
  0.94950000   2.00500772
  0.94950000   2.68671046
  0.94950000   1.67609685
  0.94950000   2.52855946
  0.94950000   1.99435145
  0.94950000   2.68828636
  0.94950000   1.67314131
  0.94950000   2.52562702
  0.94950000   2.00034027
  0.94950000   2.68742868
  0.94950000   1.67469799
  0.94950000   2.52715944
  0.94950000   1.99716375
  0.94950000   2.68787782
  0.94950000   1.67384601
  0.94950000   2.52631024
  0.94950000   1.99888674
  0.94950000   2.68761859
  0.94950000   1.67430792
  0.94950000   2.52676194
  0.94950000   1.99794072
  0.94960000   1.66932713
  0.94960000   2.52301995
  0.94960000   2.00609504
  0.94960000   2.68753575
  0.94960000   1.67474707
  0.94960000   2.52839149
  0.94960000   1.99500279
  0.94960000   2.68923835
  0.94960000   1.67156089
  0.94960000   2.52522099
  0.94960000   2.00148440
  0.94960000   2.68827759
  0.94960000   1.67330786
  0.94960000   2.52694774
  0.94960000   1.99790758
  0.94960000   2.68880543
  0.94960000   1.67231090
  0.94960000   2.52595192
  0.94960000   1.99993277
  0.94960000   2.68849223
  0.94960000   1.67287246
  0.94960000   2.52650415
  0.94960000   1.99877985
  0.94970000   1.67161449
  0.94970000   2.52646432
  0.94970000   1.99932248
  0.94970000   2.68969264
  0.94970000   1.67093617
  0.94970000   2.52577365
  0.94970000   2.00069360
  0.94970000   2.68945302
  0.94970000   1.67134293
  0.94970000   2.52616813
  0.94970000   1.99984700
  0.94970000   2.68956446
  0.94970000   1.67111024
  0.94970000   2.52592825
  0.94970000   2.00031305
  0.94970000   2.68947635
  0.94970000   1.67125194
  0.94970000   2.52606293
  0.94970000   2.00001442
  0.94970000   2.68950999
  0.94970000   1.67117279
  0.94970000   2.52597886
  0.94970000   2.00016956
  0.94980000   1.67299746
  0.94980000   2.52900310
  0.94980000   1.99440665
  0.94980000   2.69141368
  0.94980000   1.66794419
  0.94980000   2.52394648
  0.94980000   2.00476175
  0.94980000   2.68979635
  0.94980000   1.67089186
  0.94980000   2.52688340
  0.94980000   1.99868515
  0.94980000   2.69077172
  0.94980000   1.66906356
  0.94980000   2.52504928
  0.94980000   2.00243114
  0.94980000   2.69016287
  0.94980000   1.67016630
  0.94980000   2.52614504
  0.94980000   2.00015541
  0.94980000   2.69051846
  0.94980000   1.66949273
  0.94980000   2.52546691
  0.94980000   2.00153274
  0.94990000   1.67181897
  0.94990000   2.52899701
  0.94990000   1.99472551
  0.94990000   2.69240813
  0.94990000   1.66629324
  0.94990000   2.52345173
  0.94990000   2.00609109
  0.94990000   2.69057877
  0.94990000   1.66963054
  0.94990000   2.52678924
  0.94990000   1.99918806
  0.94990000   2.69172749
  0.94990000   1.66748330
  0.94990000   2.52462979
  0.94990000   2.00360515
  0.94990000   2.69098989
  0.94990000   1.66882298
  0.94990000   2.52596679
  0.94990000   2.00083219
  0.94990000   2.69144128
  0.94990000   1.66797300
  0.94990000   2.52510970
  0.94990000   2.00257835
  0.95000000   1.66872619
  0.95000000   2.52707416
  0.95000000   1.99899214
  0.95000000   2.69283611
  0.95000000   1.66568510
  0.95000000   2.52400358
  0.95000000   2.00526708
  0.95000000   2.69175546
  0.95000000   1.66764237
  0.95000000   2.52596247
  0.95000000   2.00119963
  0.95000000   2.69243999
  0.95000000   1.66635326
  0.95000000   2.52465839
  0.95000000   2.00385749
  0.95000000   2.69197250
  0.95000000   1.66719441
  0.95000000   2.52549812
  0.95000000   2.00210723
  0.95000000   2.69226102
  0.95000000   1.66664542
  0.95000000   2.52494092
  0.95000000   2.00323672
  0.95010000   1.66506544
  0.95010000   2.52455739
  0.95010000   2.00448477
  0.95010000   2.69295034
  0.95010000   1.66565863
  0.95010000   2.52514193
  0.95010000   2.00323437
  0.95010000   2.69314511
  0.95010000   1.66526510
  0.95010000   2.52473459
  0.95010000   2.00403867
  0.95010000   2.69298302
  0.95010000   1.66553755
  0.95010000   2.52500153
  0.95010000   2.00346206
  0.95010000   2.69306914
  0.95010000   1.66535808
  0.95010000   2.52481415
  0.95010000   2.00382648
  0.95010000   2.69299207
  0.95010000   1.66548331
  0.95010000   2.52493533
  0.95010000   2.00355932
  0.95020000   1.66178269
  0.95020000   2.52239625
  0.95020000   2.00924790
  0.95020000   2.69305738
  0.95020000   1.66564957
  0.95020000   2.52629835
  0.95020000   2.00116223
  0.95020000   2.69452586
  0.95020000   1.66290940
  0.95020000   2.52351634
  0.95020000   2.00685970
  0.95020000   2.69348458
  0.95020000   1.66480037
  0.95020000   2.52542280
  0.95020000   2.00290511
  0.95020000   2.69419419
  0.95020000   1.66347246
  0.95020000   2.52407295
  0.95020000   2.00566478
  0.95020000   2.69368302
  0.95020000   1.66439698
  0.95020000   2.52500360
  0.95020000   2.00372981
  0.95030000   1.65921022
  0.95030000   2.52093861
  0.95030000   2.01256436
  0.95030000   2.69336973
  0.95030000   1.66526392
  0.95030000   2.52707517
  0.95030000   1.99987052
  0.95030000   2.69576688
  0.95030000   1.66081508
  0.95030000   2.52255250
  0.95030000   2.00915831
  0.95030000   2.69404943
  0.95030000   1.66394828
  0.95030000   2.52572681
  0.95030000   2.00258913
  0.95030000   2.69527743
  0.95030000   1.66166680
  0.95030000   2.52340542
  0.95030000   2.00735244
  0.95030000   2.69438343
  0.95030000   1.66329506
  0.95030000   2.52505365
  0.95030000   2.00393780
  0.95040000   1.65735137
  0.95040000   2.52019965
  0.95040000   2.01440176
  0.95040000   2.69396951
  0.95040000   1.66434866
  0.95040000   2.52731643
  0.95040000   1.99968205
  0.95040000   2.69682874
  0.95040000   1.65905272
  0.95040000   2.52191884
  0.95040000   2.01077778
  0.95040000   2.69473031
  0.95040000   1.66288384
  0.95040000   2.52581399
  0.95040000   2.00271983
  0.95040000   2.69628327
  0.95040000   1.66000614
  0.95040000   2.52287891
  0.95040000   2.00875048
  0.95040000   2.69512586
  0.95040000   1.66211746
  0.95040000   2.52502429
  0.95040000   2.00430947
  0.95050000   1.65616719
  0.95050000   2.52014789
  0.95050000   2.01482348
  0.95050000   2.69488658
  0.95050000   1.66284895
  0.95050000   2.52696312
  0.95050000   2.00072011
  0.95050000   2.69769046
  0.95050000   1.65765939
  0.95050000   2.52165721
  0.95050000   2.01163109
  0.95050000   2.69556462
  0.95050000   1.66153825
  0.95050000   2.52561280
  0.95050000   2.00344536
  0.95050000   2.69718285
  0.95050000   1.65854292
  0.95050000   2.52254871
  0.95050000   2.00974453
  0.95050000   2.69594126
  0.95050000   1.66080734
  0.95050000   2.52485700
  0.95050000   2.00496579
  0.95060000   1.65565290
  0.95060000   2.52078379
  0.95060000   2.01382695
  0.95060000   2.69613508
  0.95060000   1.66074059
  0.95060000   2.52598475
  0.95060000   2.00304906
  0.95060000   2.69831814
  0.95060000   1.65669657
  0.95060000   2.52183423
  0.95060000   2.01157996
  0.95060000   2.69659501
  0.95060000   1.65983374
  0.95060000   2.52504125
  0.95060000   2.00493566
  0.95060000   2.69793606
  0.95060000   1.65735018
  0.95060000   2.52249173
  0.95060000   2.01017547
  0.95060000   2.69687087
  0.95060000   1.65928915
  0.95060000   2.52447334
  0.95060000   2.00606892
  0.95070000   1.65576521
  0.95070000   2.52206535
  0.95070000   2.01149671
  0.95070000   2.69768032
  0.95070000   1.65809083
  0.95070000   2.52444198
  0.95070000   2.00654491
  0.95070000   2.69868819
  0.95070000   1.65620759
  0.95070000   2.52249733
  0.95070000   2.01052527
  0.95070000   2.69784531
  0.95070000   1.65772803
  0.95070000   2.52405200
  0.95070000   2.00728931
  0.95070000   2.69850402
  0.95070000   1.65649891
  0.95070000   2.52278313
  0.95070000   2.00988742
  0.95070000   2.69795342
  0.95070000   1.65749246
  0.95070000   2.52379899
  0.95070000   2.00777288
  0.95080000   1.65635018
  0.95080000   2.52383411
  0.95080000   2.00815764
  0.95080000   2.69941441
  0.95080000   1.65510178
  0.95080000   2.52253424
  0.95080000   2.01079662
  0.95080000   2.69882720
  0.95080000   1.65614445
  0.95080000   2.52359881
  0.95080000   2.00856397
  0.95080000   2.69928313
  0.95080000   1.65528284
  0.95080000   2.52270327
  0.95080000   2.01038687
  0.95080000   2.69887998
  0.95080000   1.65600144
  0.95080000   2.52343765
  0.95080000   2.00884899
  0.95080000   2.69919482
  0.95080000   1.65540774
  0.95080000   2.52282087
  0.95080000   2.01010528
  0.95090000   1.65715729
  0.95090000   2.52583122
  0.95090000   2.00434272
  0.95090000   2.70119157
  0.95090000   1.65204320
  0.95090000   2.52053531
  0.95090000   2.01523910
  0.95090000   2.69882229
  0.95090000   1.65634790
  0.95090000   2.52497520
  0.95090000   2.00603235
  0.95090000   2.70081951
  0.95090000   1.65266339
  0.95090000   2.52116113
  0.95090000   2.01388587
  0.95090000   2.69910822
  0.95090000   1.65577677
  0.95090000   2.52437307
  0.95090000   2.00722885
  0.95090000   2.70055200
  0.95090000   1.65311549
  0.95090000   2.52161854
  0.95090000   2.01290234
  0.95100000   1.65792269
  0.95100000   2.52778492
  0.95100000   2.00061310
  0.95100000   2.70289157
  0.95100000   1.64913502
  0.95100000   2.51867371
  0.95100000   2.01940034
  0.95100000   2.69878456
  0.95100000   1.65661395
  0.95100000   2.52641643
  0.95100000   2.00336377
  0.95100000   2.70235557
  0.95100000   1.65005148
  0.95100000   2.51961230
  0.95100000   2.01740077
  0.95100000   2.69926448
  0.95100000   1.65568596
  0.95100000   2.52544677
  0.95100000   2.00532101
  0.95100000   2.70195613
  0.95100000   1.65074281
  0.95100000   2.52032132
  0.95100000   2.01589723
  0.95110000   1.65845159
  0.95110000   2.52949565
  0.95110000   1.99738204
  0.95110000   2.70445460
  0.95110000   1.64648450
  0.95110000   2.51706487
  0.95110000   2.02304166
  0.95110000   2.69879938
  0.95110000   1.65678523
  0.95110000   2.52776056
  0.95110000   2.00089307
  0.95110000   2.70382853
  0.95110000   1.64756135
  0.95110000   2.51817666
  0.95110000   2.02068388
  0.95110000   2.69941481
  0.95110000   1.65560760
  0.95110000   2.52653368
  0.95110000   2.00338365
  0.95110000   2.70335225
  0.95110000   1.64839042
  0.95110000   2.51903340
  0.95110000   2.01887473
  0.95120000   1.65864753
  0.95120000   2.53086519
  0.95120000   1.99485388
  0.95120000   2.70587299
  0.95120000   1.64410315
  0.95120000   2.51572528
  0.95120000   2.02612868
  0.95120000   2.69890661
  0.95120000   1.65678788
  0.95120000   2.52893161
  0.95120000   1.99877793
  0.95120000   2.70521902
  0.95120000   1.64522720
  0.95120000   2.51689215
  0.95120000   2.02365656
  0.95120000   2.69959358
  0.95120000   1.65547828
  0.95120000   2.52756841
  0.95120000   2.00155213
  0.95120000   2.70471555
  0.95120000   1.64610332
  0.95120000   2.51780242
  0.95120000   2.02173636
  0.95130000   1.65848418
  0.95130000   2.53186674
  0.95130000   1.99308534
  0.95130000   2.70716256
  0.95130000   1.64196013
  0.95130000   2.51462629
  0.95130000   2.02872017
  0.95130000   2.69911508
  0.95130000   1.65660525
  0.95130000   2.52991238
  0.95130000   1.99705460
  0.95130000   2.70653118
  0.95130000   1.64304041
  0.95130000   2.51575200
  0.95130000   2.02633258
  0.95130000   2.69981126
  0.95130000   1.65527860
  0.95130000   2.52853083
  0.95130000   1.99986831
  0.95130000   2.70604137
  0.95130000   1.64388958
  0.95130000   2.51663787
  0.95130000   2.02446237
  0.95140000   1.65794840
  0.95140000   2.53248626
  0.95140000   1.99210666
  0.95140000   2.70833636
  0.95140000   1.64003010
  0.95140000   2.51374420
  0.95140000   2.03086478
  0.95140000   2.69942980
  0.95140000   1.65622798
  0.95140000   2.53069287
  0.95140000   1.99574439
  0.95140000   2.70777037
  0.95140000   1.64099032
  0.95140000   2.51474692
  0.95140000   2.02873091
  0.95140000   2.70007461
  0.95140000   1.65499596
  0.95140000   2.52940783
  0.95140000   1.99835963
  0.95140000   2.70732836
  0.95140000   1.64175126
  0.95140000   2.51554299
  0.95140000   2.02704597
  0.95150000   1.65698939
  0.95150000   2.53267002
  0.95150000   1.99203035
  0.95150000   2.70938800
  0.95150000   1.63832319
  0.95150000   2.51309236
  0.95150000   2.03253447
  0.95150000   2.69987604
  0.95150000   1.65560958
  0.95150000   2.53122456
  0.95150000   1.99494851
  0.95150000   2.70892811
  0.95150000   1.63909128
  0.95150000   2.51389401
  0.95150000   2.03081596
  0.95150000   2.70040606
  0.95150000   1.65458903
  0.95150000   2.53015646
  0.95150000   1.99711537
  0.95150000   2.70856557
  0.95150000   1.63970760
  0.95150000   2.51453929
  0.95150000   2.02944253
  0.95160000   1.65549752
  0.95160000   2.53230210
  0.95160000   1.99309804
  0.95160000   2.71028175
  0.95160000   1.63690246
  0.95160000   2.51274066
  0.95160000   2.03358419
  0.95160000   2.70051693
  0.95160000   1.65463425
  0.95160000   2.53138666
  0.95160000   1.99491823
  0.95160000   2.70997120
  0.95160000   1.63740200
  0.95160000   2.51325779
  0.95160000   2.03245392
  0.95160000   2.70086144
  0.95160000   1.65395531
  0.95160000   2.53067021
  0.95160000   1.99635684
  0.95160000   2.70972234
  0.95160000   1.63781313
  0.95160000   2.51368624
  0.95160000   2.03152881
  0.95170000   1.65332350
  0.95170000   2.53122246
  0.95170000   1.99564316
  0.95170000   2.71094505
  0.95170000   1.63589749
  0.95170000   2.51283060
  0.95170000   2.03372041
  0.95170000   2.70146543
  0.95170000   1.65309537
  0.95170000   2.53096250
  0.95170000   1.99610411
  0.95170000   2.71082743
  0.95170000   1.63605109
  0.95170000   2.51297832
  0.95170000   2.03335445
  0.95170000   2.70155263
  0.95170000   1.65288963
  0.95170000   2.53073516
  0.95170000   1.99652855
  0.95170000   2.71073234
  0.95170000   1.63618600
  0.95170000   2.51311218
  0.95170000   2.03303889
  0.95180000   1.65033476
  0.95180000   2.52928328
  0.95180000   1.99997406
  0.95180000   2.71126407
  0.95180000   1.63551299
  0.95180000   2.51358460
  0.95180000   2.03248128
  0.95180000   2.70288345
  0.95180000   1.65069864
  0.95180000   2.52963963
  0.95180000   1.99915605
  0.95180000   2.71136070
  0.95180000   1.63528215
  0.95180000   2.51332003
  0.95180000   2.03296910
  0.95180000   2.70267990
  0.95180000   1.65102608
  0.95180000   2.52996715
  0.95180000   1.99842908
  0.95180000   2.71145674
  0.95180000   1.63507416
  0.95180000   2.51308612
  0.95180000   2.03341510
  0.95190000   1.64649073
  0.95190000   2.52642656
  0.95190000   2.00621252
  0.95190000   2.71109388
  0.95190000   1.63601159
  0.95190000   2.51528619
  0.95190000   2.02927682
  0.95190000   2.70494174
  0.95190000   1.64713803
  0.95190000   2.52708375
  0.95190000   2.00476989
  0.95190000   2.71134254
  0.95190000   1.63550668
  0.95190000   2.51472771
  0.95190000   2.03037424
  0.95190000   2.70454621
  0.95190000   1.64781507
  0.95190000   2.52778056
  0.95190000   2.00327614
  0.95190000   2.71160924
  0.95190000   1.63499145
  0.95190000   2.51416393
  0.95190000   2.03150419
  0.95200000   1.64190416
  0.95200000   2.52275170
  0.95200000   2.01415284
  0.95200000   2.71030242
  0.95200000   1.63763593
  0.95200000   2.51819293
  0.95200000   2.02356846
  0.95200000   2.70771235
  0.95200000   1.64229519
  0.95200000   2.52314367
  0.95200000   2.01326076
  0.95200000   2.71047478
  0.95200000   1.63726709
  0.95200000   2.51778145
  0.95200000   2.02436212
  0.95200000   2.70743867
  0.95200000   1.64274742
  0.95200000   2.52360933
  0.95200000   2.01224683
  0.95200000   2.71069098
  0.95200000   1.63684109
  0.95200000   2.51731478
  0.95200000   2.02529182
  0.95210000   1.63685369
  0.95210000   2.51853680
  0.95210000   2.02321724
  0.95210000   2.70885147
  0.95210000   1.64046280
  0.95210000   2.52237648
  0.95210000   2.01520086
  0.95210000   2.71102912
  0.95210000   1.63649072
  0.95210000   2.51812554
  0.95210000   2.02399238
  0.95210000   2.70857271
  0.95210000   1.64091062
  0.95210000   2.52283557
  0.95210000   2.01418769
  0.95210000   2.71124837
  0.95210000   1.63605052
  0.95210000   2.51764033
  0.95210000   2.02495208
  0.95210000   2.70825365
  0.95210000   1.64145368
  0.95210000   2.52340168
  0.95210000   2.01297377
  0.95220000   1.63173041
  0.95220000   2.51419138
  0.95220000   2.03255454
  0.95220000   2.70687436
  0.95220000   1.64425967
  0.95220000   2.52757155
  0.95220000   2.00471860
  0.95220000   2.71445954
  0.95220000   1.63052213
  0.95220000   2.51286157
  0.95220000   2.03523506
  0.95220000   2.70588659
  0.95220000   1.64600220
  0.95220000   2.52939209
  0.95220000   2.00087438
  0.95220000   2.71517275
  0.95220000   1.62920282
  0.95220000   2.51141748
  0.95220000   2.03818309
  0.95220000   2.70478201
  0.95220000   1.64798327
  0.95220000   2.53146300
  0.95220000   1.99653064
  0.95230000   1.62693438
  0.95230000   2.51015050
  0.95230000   2.04126125
  0.95230000   2.70468074
  0.95230000   1.64846944
  0.95230000   2.53317245
  0.95230000   1.99337807
  0.95230000   2.71750165
  0.95230000   1.62529273
  0.95230000   2.50833596
  0.95230000   2.04494615
  0.95230000   2.70316397
  0.95230000   1.65118905
  0.95230000   2.53599778
  0.95230000   1.98744083
  0.95230000   2.71827036
  0.95230000   1.62388976
  0.95230000   2.50678713
  0.95230000   2.04811022
  0.95230000   2.70181846
  0.95230000   1.65362291
  0.95230000   2.53851776
  0.95230000   1.98216010
  0.95240000   1.62276518
  0.95240000   2.50675328
  0.95240000   2.04863420
  0.95240000   2.70265515
  0.95240000   1.65238907
  0.95240000   2.53843731
  0.95240000   1.98272461
  0.95240000   2.71987402
  0.95240000   1.62129071
  0.95240000   2.50511009
  0.95240000   2.05196337
  0.95240000   2.70115315
  0.95240000   1.65509166
  0.95240000   2.54122327
  0.95240000   1.97686688
  0.95240000   2.72033864
  0.95240000   1.62043874
  0.95240000   2.50415874
  0.95240000   2.05388895
  0.95240000   2.70025672
  0.95240000   1.65670643
  0.95240000   2.54287985
  0.95240000   1.97338142
  0.95250000   1.61935348
  0.95250000   2.50415982
  0.95250000   2.05434235
  0.95250000   2.70110299
  0.95250000   1.65545176
  0.95250000   2.54278675
  0.95250000   1.97396836
  0.95250000   2.72161975
  0.95250000   1.61841919
  0.95250000   2.50310555
  0.95250000   2.05645100
  0.95250000   2.70007511
  0.95250000   1.65728747
  0.95250000   2.54466350
  0.95250000   1.97000213
  0.95250000   2.72177990
  0.95250000   1.61810617
  0.95250000   2.50274670
  0.95250000   2.05714869
  0.95250000   2.69971563
  0.95250000   1.65791443
  0.95250000   2.54529764
  0.95250000   1.96864439
  0.95260000   1.61665761
  0.95260000   2.50233903
  0.95260000   2.05845069
  0.95260000   2.70014437
  0.95260000   1.65742837
  0.95260000   2.54600050
  0.95260000   1.96757152
  0.95260000   2.72296260
  0.95260000   1.61626626
  0.95260000   2.50188366
  0.95260000   2.05931816
  0.95260000   2.69967468
  0.95260000   1.65823692
  0.95260000   2.54681475
  0.95260000   1.96581717
  0.95260000   2.72297284
  0.95260000   1.61621177
  0.95260000   2.50181072
  0.95260000   2.05942285
  0.95260000   2.69959246
  0.95260000   1.65835255
  0.95260000   2.54692234
  0.95260000   1.96555557
  0.95270000   1.61451583
  0.95270000   2.50112188
  0.95270000   2.06130947
  0.95270000   2.69971269
  0.95270000   1.65843596
  0.95270000   2.54821184
  0.95270000   1.96325887
  0.95270000   2.72411489
  0.95270000   1.61444960
  0.95270000   2.50102736
  0.95270000   2.06142853
  0.95270000   2.69960211
  0.95270000   1.65858219
  0.95270000   2.54834427
  0.95270000   1.96292442
  0.95270000   2.72408490
  0.95270000   1.61446058
  0.95270000   2.50102708
  0.95270000   2.06138215
  0.95270000   2.69959345
  0.95270000   1.65856202
  0.95270000   2.54831222
  0.95270000   1.96295365
  0.95280000   1.61272243
  0.95280000   2.50028528
  0.95280000   2.06338051
  0.95280000   2.69963353
  0.95280000   1.65879390
  0.95280000   2.54975474
  0.95280000   1.96033624
  0.95280000   2.72519714
  0.95280000   1.61275594
  0.95280000   2.50030187
  0.95280000   2.06326850
  0.95280000   2.69963856
  0.95280000   1.65872667
  0.95280000   2.54966774
  0.95280000   1.96045894
  0.95280000   2.72516475
  0.95280000   1.61276910
  0.95280000   2.50030404
  0.95280000   2.06321687
  0.95280000   2.69963289
  0.95280000   1.65870097
  0.95280000   2.54962999
  0.95280000   1.96050008
  0.95290000   1.61109440
  0.95290000   2.49962763
  0.95290000   2.06508123
  0.95290000   2.69971911
  0.95290000   1.65884816
  0.95290000   2.55098593
  0.95290000   1.95806127
  0.95290000   2.72625434
  0.95290000   1.61110801
  0.95290000   2.49962185
  0.95290000   2.06501505
  0.95290000   2.69970118
  0.95290000   1.65882325
  0.95290000   2.55094239
  0.95290000   1.95809347
  0.95290000   2.72622214
  0.95290000   1.61112124
  0.95290000   2.49962421
  0.95290000   2.06496309
  0.95290000   2.69969612
  0.95290000   1.65879647
  0.95290000   2.55090353
  0.95290000   1.95813702
  0.95300000   1.60950830
  0.95300000   2.49901169
  0.95300000   2.06669602
  0.95300000   2.69983062
  0.95300000   1.65885491
  0.95300000   2.55216870
  0.95300000   1.95588566
  0.95300000   2.72729392
  0.95300000   1.60949494
  0.95300000   2.49897563
  0.95300000   2.06669253
  0.95300000   2.69978001
  0.95300000   1.65889033
  0.95300000   2.55218712
  0.95300000   1.95578878
  0.95300000   2.72725926
  0.95300000   1.60951311
  0.95300000   2.49898364
  0.95300000   2.06662892
  0.95300000   2.69978154
  0.95300000   1.65885145
  0.95300000   2.55213582
  0.95300000   1.95585835
  0.95310000   1.60790533
  0.95310000   2.49837156
  0.95310000   2.06836159
  0.95310000   2.69989702
  0.95310000   1.65894526
  0.95310000   2.55343774
  0.95310000   1.95352866
  0.95310000   2.72830973
  0.95310000   1.60792870
  0.95310000   2.49837708
  0.95310000   2.06827221
  0.95310000   2.69989259
  0.95310000   1.65889559
  0.95310000   2.55336874
  0.95310000   1.95361419
  0.95310000   2.72828017
  0.95310000   1.60793707
  0.95310000   2.49837411
  0.95310000   2.06823135
  0.95310000   2.69988240
  0.95310000   1.65887839
  0.95310000   2.55333969
  0.95310000   1.95363741
  0.95320000   1.60627537
  0.95320000   2.49769570
  0.95320000   2.07010208
  0.95320000   2.69990356
  0.95320000   1.65914645
  0.95320000   2.55482105
  0.95320000   1.95093186
  0.95320000   2.72929380
  0.95320000   1.60642342
  0.95320000   2.49784264
  0.95320000   2.06971991
  0.95320000   2.70006036
  0.95320000   1.65879947
  0.95320000   2.55444653
  0.95320000   1.95165471
  0.95320000   2.72929190
  0.95320000   1.60638018
  0.95320000   2.49778128
  0.95320000   2.06980003
  0.95320000   2.69998423
  0.95320000   1.65890394
  0.95320000   2.55454254
  0.95320000   1.95141720
  0.95330000   1.60463489
  0.95330000   2.49700261
  0.95330000   2.07187934
  0.95330000   2.69986928
  0.95330000   1.65942344
  0.95330000   2.55628254
  0.95330000   1.94817049
  0.95330000   2.73024234
  0.95330000   1.60498515
  0.95330000   2.49737973
  0.95330000   2.07102008
  0.95330000   2.70029538
  0.95330000   1.65857972
  0.95330000   2.55539754
  0.95330000   1.94995846
  0.95330000   2.73030207
  0.95330000   1.60482883
  0.95330000   2.49718989
  0.95330000   2.07136661
  0.95330000   2.70007036
  0.95330000   1.65895886
  0.95330000   2.55577596
  0.95330000   1.94913183
  0.95340000   1.60301076
  0.95340000   2.49632282
  0.95340000   2.07363010
  0.95340000   2.69982903
  0.95340000   1.65971187
  0.95340000   2.55775610
  0.95340000   1.94538249
  0.95340000   2.73115891
  0.95340000   1.60360673
  0.95340000   2.49698075
  0.95340000   2.07218827
  0.95340000   2.70059247
  0.95340000   1.65824603
  0.95340000   2.55623147
  0.95340000   1.94850537
  0.95340000   2.73131509
  0.95340000   1.60327532
  0.95340000   2.49659125
  0.95340000   2.07294912
  0.95340000   2.70013060
  0.95340000   1.65906197
  0.95340000   2.55705929
  0.95340000   1.94674100
  0.95350000   1.60143545
  0.95350000   2.49569359
  0.95350000   2.07527710
  0.95350000   2.69982843
  0.95350000   1.65992757
  0.95350000   2.55915533
  0.95350000   1.94274818
  0.95350000   2.73205688
  0.95350000   1.60226361
  0.95350000   2.49661823
  0.95350000   2.07328140
  0.95350000   2.70092214
  0.95350000   1.65785286
  0.95350000   2.55700416
  0.95350000   1.94717910
  0.95350000   2.73232851
  0.95350000   1.60172458
  0.95350000   2.49599098
  0.95350000   2.07453594
  0.95350000   2.70017117
  0.95350000   1.65920176
  0.95350000   2.55838071
  0.95350000   1.94426938
  0.95360000   1.59995216
  0.95360000   2.49516483
  0.95360000   2.07671667
  0.95360000   2.69993156
  0.95360000   1.65995219
  0.95360000   2.56035889
  0.95360000   1.94052087
  0.95360000   2.73296393
  0.95360000   1.60090605
  0.95360000   2.49623559
  0.95360000   2.07441684
  0.95360000   2.70121831
  0.95360000   1.65752199
  0.95360000   2.55784104
  0.95360000   1.94571790
  0.95360000   2.73332771
  0.95360000   1.60020340
  0.95360000   2.49541978
  0.95360000   2.07606337
  0.95360000   2.70022922
  0.95360000   1.65930971
  0.95360000   2.55966982
  0.95360000   1.94186393
  0.95370000   1.59862353
  0.95370000   2.49480921
  0.95370000   2.07779767
  0.95370000   2.70023394
  0.95370000   1.65960949
  0.95370000   2.56118578
  0.95370000   1.93907852
  0.95370000   2.73392727
  0.95370000   1.59944998
  0.95370000   2.49573642
  0.95370000   2.07579493
  0.95370000   2.70136295
  0.95370000   1.65747078
  0.95370000   2.55896652
  0.95370000   1.94365322
  0.95370000   2.73427672
  0.95370000   1.59877654
  0.95370000   2.49495220
  0.95370000   2.07737663
  0.95370000   2.70039830
  0.95370000   1.65921326
  0.95370000   2.56074928
  0.95370000   1.93989483
  0.95380000   1.59753479
  0.95380000   2.49472587
  0.95380000   2.07831362
  0.95380000   2.70086689
  0.95380000   1.65865772
  0.95380000   2.56138624
  0.95380000   1.93894290
  0.95380000   2.73500988
  0.95380000   1.59778392
  0.95380000   2.49499184
  0.95380000   2.07768372
  0.95380000   2.70119020
  0.95380000   1.65800467
  0.95380000   2.56069571
  0.95380000   1.94032688
  0.95380000   2.73510356
  0.95380000   1.59757189
  0.95380000   2.49473606
  0.95380000   2.07816839
  0.95380000   2.70086791
  0.95380000   1.65856306
  0.95380000   2.56125944
  0.95380000   1.93911307
  0.95390000   1.59678135
  0.95390000   2.49502617
  0.95390000   2.07803203
  0.95390000   2.70197669
  0.95390000   1.65682930
  0.95390000   2.56067983
  0.95390000   1.94070095
  0.95390000   2.73626133
  0.95390000   1.59582055
  0.95390000   2.49389915
  0.95390000   2.08029695
  0.95390000   2.70055234
  0.95390000   1.65939673
  0.95390000   2.56330757
  0.95390000   1.93515668
  0.95390000   2.73569069
  0.95390000   1.59679562
  0.95390000   2.49501019
  0.95390000   2.07794131
  0.95390000   2.70194510
  0.95390000   1.65679492
  0.95390000   2.56061506
  0.95390000   1.94074177
  0.95400000   1.59643356
  0.95400000   2.49579267
  0.95400000   2.07677949
  0.95400000   2.70366609
  0.95400000   1.65394006
  0.95400000   2.55886437
  0.95400000   1.94477801
  0.95400000   2.73765904
  0.95400000   1.59359973
  0.95400000   2.49250112
  0.95400000   2.08354579
  0.95400000   2.69947261
  0.95400000   1.66160677
  0.95400000   2.56675358
  0.95400000   1.92824546
  0.95400000   2.73592769
  0.95400000   1.59663791
  0.95400000   2.49599560
  0.95400000   2.07623349
  0.95400000   2.70390404
  0.95400000   1.65341121
  0.95400000   2.55828527
  0.95400000   1.94589399
  0.95410000   1.59647763
  0.95410000   2.49701056
  0.95410000   2.07458465
  0.95410000   2.70590327
  0.95410000   1.65005688
  0.95410000   2.55598992
  0.95410000   1.95107424
  0.95410000   2.73906202
  0.95410000   1.59136825
  0.95410000   2.49108097
  0.95410000   2.08684128
  0.95410000   2.69829843
  0.95410000   1.66399557
  0.95410000   2.57037191
  0.95410000   1.92097646
  0.95410000   2.73590012
  0.95410000   1.59694275
  0.95410000   2.49751371
  0.95410000   2.07341308
  0.95410000   2.70649863
  0.95410000   1.64887679
  0.95410000   2.55472301
  0.95410000   1.95363028
  0.95420000   1.59674531
  0.95420000   2.49848632
  0.95420000   2.07184852
  0.95420000   2.70843108
  0.95420000   1.64565927
  0.95420000   2.55253904
  0.95420000   1.95858467
  0.95420000   2.74027068
  0.95420000   1.58947498
  0.95420000   2.49004488
  0.95420000   2.08933897
  0.95420000   2.69758833
  0.95420000   1.66552823
  0.95420000   2.57311075
  0.95420000   1.91554287
  0.95420000   2.73601513
  0.95420000   1.59699163
  0.95420000   2.49873750
  0.95420000   2.07120141
  0.95420000   2.70871460
  0.95420000   1.64505175
  0.95420000   2.55186784
  0.95420000   1.95989557
  0.95430000   1.59686280
  0.95430000   2.49978944
  0.95430000   2.06946808
  0.95430000   2.71072835
  0.95430000   1.64169957
  0.95430000   2.54951366
  0.95430000   1.96521246
  0.95430000   2.74123056
  0.95430000   1.58802000
  0.95430000   2.48951350
  0.95430000   2.09078829
  0.95430000   2.69754541
  0.95430000   1.66582520
  0.95430000   2.57459369
  0.95430000   1.91272676
  0.95430000   2.73656494
  0.95430000   1.59627326
  0.95430000   2.49907775
  0.95430000   2.07082959
  0.95430000   2.70987627
  0.95430000   1.64315572
  0.95430000   2.55103512
  0.95430000   1.96193010
  0.95440000   1.59626714
  0.95440000   2.50027110
  0.95440000   2.06879919
  0.95440000   2.71205538
  0.95440000   1.63951132
  0.95440000   2.54835440
  0.95440000   1.96793458
  0.95440000   2.74219124
  0.95440000   1.58658439
  0.95440000   2.48900113
  0.95440000   2.09220038
  0.95440000   2.69751332
  0.95440000   1.66610277
  0.95440000   2.57605729
  0.95440000   1.90995068
  0.95440000   2.73709320
  0.95440000   1.59559373
  0.95440000   2.49946189
  0.95440000   2.07036541
  0.95440000   2.71109060
  0.95440000   1.64116864
  0.95440000   2.55009751
  0.95440000   1.96418602
  0.95450000   1.59434435
  0.95450000   2.49921860
  0.95450000   2.07133358
  0.95450000   2.71157523
  0.95450000   1.64059799
  0.95450000   2.55069483
  0.95450000   1.96331939
  0.95450000   2.74343543
  0.95450000   1.58469790
  0.95450000   2.48795700
  0.95450000   2.09472307
  0.95450000   2.69669964
  0.95450000   1.66783178
  0.95450000   2.57898952
  0.95450000   1.90411652
  0.95450000   2.73687004
  0.95450000   1.59623325
  0.95450000   2.50136803
  0.95450000   2.06672089
  0.95450000   2.71407577
  0.95450000   1.63598742
  0.95450000   2.54571937
  0.95450000   1.97366027
  0.95460000   1.59072371
  0.95460000   2.49618625
  0.95460000   2.07800336
  0.95460000   2.70858267
  0.95460000   1.64625204
  0.95460000   2.55788264
  0.95460000   1.94854285
  0.95460000   2.74439977
  0.95460000   1.58333852
  0.95460000   2.48752712
  0.95460000   2.09597198
  0.95460000   2.69674606
  0.95460000   1.66796588
  0.95460000   2.58030839
  0.95460000   1.90164245
  0.95460000   2.73738200
  0.95460000   1.59558230
  0.95460000   2.50178553
  0.95460000   2.06618355
  0.95460000   2.71532713
  0.95460000   1.63395042
  0.95460000   2.54469736
  0.95460000   1.97610038
  0.95470000   1.58570606
  0.95470000   2.49149332
  0.95470000   2.08813671
  0.95470000   2.70307399
  0.95470000   1.65655064
  0.95470000   2.56983709
  0.95470000   1.92381091
  0.95470000   2.74305358
  0.95470000   1.58597571
  0.95470000   2.49178977
  0.95470000   2.08744257
  0.95470000   2.70347938
  0.95470000   1.65574980
  0.95470000   2.56898961
  0.95470000   1.92552539
  0.95470000   2.74328198
  0.95470000   1.58553581
  0.95470000   2.49126237
  0.95470000   2.08849606
  0.95470000   2.70274859
  0.95470000   1.65705806
  0.95470000   2.57033285
  0.95470000   1.92268243
  0.95480000   1.58070026
  0.95480000   2.48676814
  0.95480000   2.09832918
  0.95480000   2.69695632
  0.95480000   1.66807136
  0.95480000   2.58280097
  0.95480000   1.89705064
  0.95480000   2.73846295
  0.95480000   1.59422543
  0.95480000   2.50256658
  0.95480000   2.06526457
  0.95480000   2.71777668
  0.95480000   1.63002191
  0.95480000   2.54279619
  0.95480000   1.98072269
  0.95480000   2.74538369
  0.95480000   1.58194337
  0.95480000   2.48819893
  0.95480000   2.09521060
  0.95480000   2.69907624
  0.95480000   1.66404772
  0.95480000   2.57868928
  0.95480000   1.90551858
  0.95490000   1.57840416
  0.95490000   2.48521402
  0.95490000   2.10190861
  0.95490000   2.69525856
  0.95490000   1.67144558
  0.95490000   2.58737990
  0.95490000   1.88779805
  0.95490000   2.73690866
  0.95490000   1.59718713
  0.95490000   2.50715768
  0.95490000   2.05597875
  0.95490000   2.72358076
  0.95490000   1.61989711
  0.95490000   2.53283181
  0.95490000   2.00196799
  0.95490000   2.74288636
  0.95490000   1.58635410
  0.95490000   2.49454408
  0.95490000   2.08230109
  0.95490000   2.70862808
  0.95490000   1.64672801
  0.95490000   2.56189791
  0.95490000   1.94088651
  0.95500000   1.58236222
  0.95500000   2.49105231
  0.95500000   2.09006451
  0.95500000   2.70455049
  0.95500000   1.65449120
  0.95500000   2.57124685
  0.95500000   1.92169162
  0.95500000   2.74604901
  0.95500000   1.58155532
  0.95500000   2.49009012
  0.95500000   2.09202549
  0.95500000   2.70316788
  0.95500000   1.65698035
  0.95500000   2.57381227
  0.95500000   1.91627738
  0.95500000   2.74507853
  0.95500000   1.58319203
  0.95500000   2.49200804
  0.95500000   2.08797584
  0.95500000   2.70587737
  0.95500000   1.65197672
  0.95500000   2.56859714
  0.95500000   1.92714396
  0.95510000   1.59559523
  0.95510000   2.50766242
  0.95510000   2.05560047
  0.95510000   2.72574478
  0.95510000   1.61655013
  0.95510000   2.53146957
  0.95510000   2.00549745
  0.95510000   2.74417471
  0.95510000   1.58463501
  0.95510000   2.49487183
  0.95510000   2.08234111
  0.95510000   2.71050468
  0.95510000   1.64378779
  0.95510000   2.56115585
  0.95510000   1.94304365
  0.95510000   2.74953337
  0.95510000   1.57574932
  0.95510000   2.48436188
  0.95510000   2.10427319
  0.95510000   2.69522162
  0.95510000   1.67186558
  0.95510000   2.59014133
  0.95510000   1.88250393
  0.95520000   1.61839017
  0.95520000   2.53471078
  0.95520000   1.99902423
  0.95520000   2.74669007
  0.95520000   1.58063795
  0.95520000   2.49133741
  0.95520000   2.09011294
  0.95520000   2.70633546
  0.95520000   1.65163032
  0.95520000   2.57061828
  0.95520000   1.92352743
  0.95520000   2.74854278
  0.95520000   1.57775454
  0.95520000   2.48791665
  0.95520000   2.09723277
  0.95520000   2.70132680
  0.95520000   1.66079156
  0.95520000   2.58010203
  0.95520000   1.90367577
  0.95520000   2.74462652
  0.95520000   1.58446252
  0.95520000   2.49583302
  0.95520000   2.08064665
  0.95530000   1.64625534
  0.95530000   2.56616806
  0.95530000   1.93319874
  0.95530000   2.75094447
  0.95530000   1.57394657
  0.95530000   2.48456302
  0.95530000   2.10464029
  0.95530000   2.69681219
  0.95530000   1.66941120
  0.95530000   2.59006829
  0.95530000   1.88324561
  0.95530000   2.73999722
  0.95530000   1.59275466
  0.95530000   2.50670351
  0.95530000   2.05822577
  0.95530000   2.72630521
  0.95530000   1.61594122
  0.95530000   2.53312096
  0.95530000   2.00256214
  0.95530000   2.74688398
  0.95530000   1.58044401
  0.95530000   2.49225021
  0.95530000   2.08845271
  0.95540000   1.67011195
  0.95540000   2.59198405
  0.95540000   1.87960320
  0.95540000   2.73995922
  0.95540000   1.59311772
  0.95540000   2.50831125
  0.95540000   2.05523494
  0.95540000   2.72883227
  0.95540000   1.61176010
  0.95540000   2.52961445
  0.95540000   2.01030076
  0.95540000   2.74602602
  0.95540000   1.58213534
  0.95540000   2.49542346
  0.95540000   2.08218344
  0.95540000   2.71339515
  0.95540000   1.63919622
  0.95540000   2.55979152
  0.95540000   1.94673970
  0.95540000   2.75299970
  0.95540000   1.57059140
  0.95540000   2.48168782
  0.95540000   2.11089262
  0.95550000   1.68007833
  0.95550000   2.60308362
  0.95550000   1.85689141
  0.95550000   2.73233240
  0.95550000   1.60670089
  0.95550000   2.52509726
  0.95550000   2.02022887
  0.95550000   2.74417041
  0.95550000   1.58552508
  0.95550000   2.50058960
  0.95550000   2.07171238
  0.95550000   2.72079490
  0.95550000   1.62616038
  0.95550000   2.54681691
  0.95550000   1.97433487
  0.95550000   2.75346734
  0.95550000   1.56994752
  0.95550000   2.48208004
  0.95550000   2.11043588
  0.95550000   2.69405967
  0.95550000   1.67491650
  0.95550000   2.59793345
  0.95550000   1.86740292
  0.95560000   1.67101827
  0.95560000   2.59527025
  0.95560000   1.87331411
  0.95560000   2.74002896
  0.95560000   1.59348555
  0.95560000   2.51108175
  0.95560000   2.05006338
  0.95560000   2.73330776
  0.95560000   1.60439053
  0.95560000   2.52360657
  0.95560000   2.02358580
  0.95560000   2.74403939
  0.95560000   1.58593204
  0.95560000   2.50222762
  0.95560000   2.06857338
  0.95560000   2.72354765
  0.95560000   1.62146837
  0.95560000   2.54280856
  0.95560000   1.98305230
  0.95560000   2.75354340
  0.95560000   1.57000529
  0.95560000   2.48330798
  0.95560000   2.10820428
  0.95570000   1.64588884
  0.95570000   2.57051587
  0.95570000   1.92520535
  0.95570000   2.75438302
  0.95570000   1.56915650
  0.95570000   2.48348274
  0.95570000   2.10831065
  0.95570000   2.69759228
  0.95570000   1.66885327
  0.95570000   2.59425422
  0.95570000   1.87561200
  0.95570000   2.74196723
  0.95570000   1.59032083
  0.95570000   2.50855367
  0.95570000   2.05565346
  0.95570000   2.73149955
  0.95570000   1.60771927
  0.95570000   2.52855827
  0.95570000   2.01340995
  0.95570000   2.74821088
  0.95570000   1.57908568
  0.95570000   2.49530811
  0.95570000   2.08340963
  0.95580000   1.61422227
  0.95580000   2.53711328
  0.95580000   1.99578661
  0.95580000   2.75360345
  0.95580000   1.57041125
  0.95580000   2.48614734
  0.95580000   2.10306091
  0.95580000   2.70252719
  0.95580000   1.65994960
  0.95580000   2.58636514
  0.95580000   1.89227711
  0.95580000   2.74844104
  0.95580000   1.57945315
  0.95580000   2.49693524
  0.95580000   2.08041421
  0.95580000   2.71829069
  0.95580000   1.63128824
  0.95580000   2.55596804
  0.95580000   1.95592667
  0.95580000   2.75753780
  0.95580000   1.56394544
  0.95580000   2.47832995
  0.95580000   2.11932406
  0.95590000   1.58650730
  0.95590000   2.50644045
  0.95590000   2.06080991
  0.95590000   2.73080248
  0.95590000   1.60944308
  0.95590000   2.53288581
  0.95590000   2.00496598
  0.95590000   2.75256972
  0.95590000   1.57230869
  0.95590000   2.48957929
  0.95590000   2.09618057
  0.95590000   2.70850124
  0.95590000   1.64920520
  0.95590000   2.57635649
  0.95590000   1.91342246
  0.95590000   2.75460098
  0.95590000   1.56924159
  0.95590000   2.48589588
  0.95590000   2.10388872
  0.95590000   2.70275665
  0.95590000   1.65969786
  0.95590000   2.58727474
  0.95590000   1.89059225
  0.95600000   1.56864978
  0.95600000   2.48637206
  0.95600000   2.10333991
  0.95600000   2.70416323
  0.95600000   1.65742254
  0.95600000   2.58614181
  0.95600000   1.89331068
  0.95600000   2.75101867
  0.95600000   1.57559549
  0.95600000   2.49468895
  0.95600000   2.08584038
  0.95600000   2.71663360
  0.95600000   1.63472490
  0.95600000   2.56207389
  0.95600000   1.94367252
  0.95600000   2.75942809
  0.95600000   1.56136394
  0.95600000   2.47752787
  0.95600000   2.12173832
  0.95600000   2.68918364
  0.95600000   1.68516860
  0.95600000   2.61395810
  0.95600000   1.83566174
  0.95610000   1.56041171
  0.95610000   2.47756100
  0.95610000   2.12214823
  0.95610000   2.68980272
  0.95610000   1.68432272
  0.95610000   2.61435856
  0.95610000   1.83518325
  0.95610000   2.72903383
  0.95610000   1.61393520
  0.95610000   2.54033686
  0.95610000   1.98989268
  0.95610000   2.75781938
  0.95610000   1.56410812
  0.95610000   2.48202538
  0.95610000   2.11270124
  0.95610000   2.69762720
  0.95610000   1.66963761
  0.95610000   2.59978488
  0.95610000   1.86515051
  0.95610000   2.74261488
  0.95610000   1.59015052
  0.95610000   2.51303403
  0.95610000   2.04748106
  0.95620000   1.55769219
  0.95620000   2.47540682
  0.95620000   2.12701714
  0.95620000   2.68642235
  0.95620000   1.69091496
  0.95620000   2.62191341
  0.95620000   1.81997801
  0.95620000   2.72199416
  0.95620000   1.62672285
  0.95620000   2.55575014
  0.95620000   1.95767419
  0.95620000   2.76190727
  0.95620000   1.55775555
  0.95620000   2.47545946
  0.95620000   2.12680554
  0.95620000   2.68653362
  0.95620000   1.69062933
  0.95620000   2.62161349
  0.95620000   1.82051780
  0.95620000   2.72226773
  0.95620000   1.62617513
  0.95620000   2.55512926
  0.95620000   1.95892203
  0.95630000   1.55621374
  0.95630000   2.47475985
  0.95630000   2.12873253
  0.95630000   2.68576087
  0.95630000   1.69239033
  0.95630000   2.62451500
  0.95630000   1.81492401
  0.95630000   2.72025514
  0.95630000   1.63008553
  0.95630000   2.56062340
  0.95630000   1.94769671
  0.95630000   2.76291852
  0.95630000   1.55638401
  0.95630000   2.47494439
  0.95630000   2.12824773
  0.95630000   2.68612011
  0.95630000   1.69163673
  0.95630000   2.62376929
  0.95630000   1.81637149
  0.95630000   2.72106681
  0.95630000   1.62856891
  0.95630000   2.55894403
  0.95630000   1.95117298
  0.95640000   1.55483745
  0.95640000   2.47423251
  0.95640000   2.13019268
  0.95640000   2.68530828
  0.95640000   1.69347073
  0.95640000   2.62673595
  0.95640000   1.81065218
  0.95640000   2.71889915
  0.95640000   1.63276599
  0.95640000   2.56473328
  0.95640000   1.93933047
  0.95640000   2.76359422
  0.95640000   1.55555711
  0.95640000   2.47509388
  0.95640000   2.12830056
  0.95640000   2.68694345
  0.95640000   1.69030933
  0.95640000   2.62369124
  0.95640000   1.81678019
  0.95640000   2.72247868
  0.95640000   1.62627322
  0.95640000   2.55760388
  0.95640000   1.95428338
  0.95650000   1.55751445
  0.95650000   2.47867403
  0.95650000   2.12124721
  0.95650000   2.69409393
  0.95650000   1.67718710
  0.95650000   2.61211650
  0.95650000   1.84080210
  0.95650000   2.73651093
  0.95650000   1.60175939
  0.95650000   2.53120594
  0.95650000   2.01040643
  0.95650000   2.75732635
  0.95650000   1.56579859
  0.95650000   2.48873151
  0.95650000   2.10002527
  0.95650000   2.71113803
  0.95650000   1.64574079
  0.95650000   2.57980820
  0.95650000   1.90781723
  0.95650000   2.76019691
  0.95650000   1.56142310
  0.95650000   2.48341832
  0.95650000   2.11118079
  0.95660000   1.57269692
  0.95660000   2.49823717
  0.95660000   2.08044130
  0.95660000   2.72584244
  0.95660000   1.61972535
  0.95660000   2.55269953
  0.95660000   1.96520372
  0.95660000   2.76595076
  0.95660000   1.55211950
  0.95660000   2.47319066
  0.95660000   2.13300998
  0.95660000   2.68439122
  0.95660000   1.69559768
  0.95660000   2.63111773
  0.95660000   1.80219560
  0.95660000   2.71603512
  0.95660000   1.63837603
  0.95660000   2.57316806
  0.95660000   1.92211705
  0.95660000   2.76391589
  0.95660000   1.55555341
  0.95660000   2.47740754
  0.95660000   2.12414830
  0.95670000   1.60816094
  0.95670000   2.54087211
  0.95670000   1.99055317
  0.95670000   2.76402916
  0.95670000   1.55540976
  0.95670000   2.47840704
  0.95670000   2.12247022
  0.95670000   2.69475416
  0.95670000   1.67637180
  0.95670000   2.61368038
  0.95670000   1.83806251
  0.95670000   2.73747633
  0.95670000   1.60053947
  0.95670000   2.53215157
  0.95670000   2.00899458
  0.95670000   2.75976257
  0.95670000   1.56225478
  0.95670000   2.48675677
  0.95670000   2.10485529
  0.95670000   2.70924206
  0.95670000   1.64962121
  0.95670000   2.58628231
  0.95670000   1.89480200
  0.95680000   1.65955754
  0.95680000   2.59787548
  0.95680000   1.87105147
  0.95680000   2.75298186
  0.95680000   1.57431841
  0.95680000   2.50252553
  0.95680000   2.07206661
  0.95680000   2.73297935
  0.95680000   1.60766090
  0.95680000   2.54146211
  0.95680000   1.98953005
  0.95680000   2.76522018
  0.95680000   1.55367630
  0.95680000   2.47742508
  0.95680000   2.12483114
  0.95680000   2.69351213
  0.95680000   1.67887315
  0.95680000   2.61733397
  0.95680000   1.83077398
  0.95680000   2.73489415
  0.95680000   1.60525132
  0.95680000   2.53872788
  0.95680000   1.99533996
  0.95690000   1.70008839
  0.95690000   2.63895741
  0.95690000   1.78718924
  0.95690000   2.70980640
  0.95690000   1.65051485
  0.95690000   2.58968629
  0.95690000   1.88843194
  0.95690000   2.75988432
  0.95690000   1.56305169
  0.95690000   2.49008526
  0.95690000   2.09863780
  0.95690000   2.71586583
  0.95690000   1.63813632
  0.95690000   2.57643152
  0.95690000   1.91601430
  0.95690000   2.76628016
  0.95690000   1.55247142
  0.95690000   2.47710683
  0.95690000   2.12586725
  0.95690000   2.69346074
  0.95690000   1.67918777
  0.95690000   2.61883374
  0.95690000   1.82794140
  0.95700000   1.69259692
  0.95700000   2.63307930
  0.95700000   1.79930043
  0.95700000   2.71896756
  0.95700000   1.63409761
  0.95700000   2.57330931
  0.95700000   1.92300138
  0.95700000   2.76854477
  0.95700000   1.54910111
  0.95700000   2.47411620
  0.95700000   2.13255313
  0.95700000   2.68827825
  0.95700000   1.68917426
  0.95700000   2.62976895
  0.95700000   1.80592531
  0.95700000   2.72307901
  0.95700000   1.62664517
  0.95700000   2.56512763
  0.95700000   1.94014957
  0.95700000   2.77022665
  0.95700000   1.54629273
  0.95700000   2.47061449
  0.95700000   2.13982134
  0.95710000   1.62894528
  0.95710000   2.56883325
  0.95710000   1.93263268
  0.95710000   2.77078334
  0.95710000   1.54573592
  0.95710000   2.47110276
  0.95710000   2.13924904
  0.95710000   2.68281069
  0.95710000   1.69975925
  0.95710000   2.64101294
  0.95710000   1.78347405
  0.95710000   2.70960566
  0.95710000   1.65130161
  0.95710000   2.59287715
  0.95710000   1.88225586
  0.95710000   2.76024900
  0.95710000   1.56292237
  0.95710000   2.49225202
  0.95710000   2.09471449
  0.95710000   2.72057122
  0.95710000   1.63013485
  0.95710000   2.57010029
  0.95710000   1.92984191
  0.95720000   1.55847191
  0.95720000   2.48799517
  0.95720000   2.10410020
  0.95720000   2.71443984
  0.95720000   1.64142241
  0.95720000   2.58354345
  0.95720000   1.90196361
  0.95720000   2.76683206
  0.95720000   1.55240306
  0.95720000   2.48052508
  0.95720000   2.11980546
  0.95720000   2.70145695
  0.95720000   1.66505733
  0.95720000   2.60825181
  0.95720000   1.85050236
  0.95720000   2.74918018
  0.95720000   1.58166201
  0.95720000   2.51595321
  0.95720000   2.04487466
  0.95720000   2.75143965
  0.95720000   1.57710247
  0.95720000   2.51049933
  0.95720000   2.05635799
  0.95730000   1.54621590
  0.95730000   2.47403617
  0.95730000   2.13387565
  0.95730000   2.68968018
  0.95730000   1.68727105
  0.95730000   2.63153699
  0.95730000   1.80312944
  0.95730000   2.72491464
  0.95730000   1.62412656
  0.95730000   2.56591563
  0.95730000   1.93937644
  0.95730000   2.77350837
  0.95730000   1.54185380
  0.95730000   2.46857006
  0.95730000   2.14524229
  0.95730000   2.67858198
  0.95730000   1.70823239
  0.95730000   2.65122217
  0.95730000   1.76350689
  0.95730000   2.69753134
  0.95730000   1.67410179
  0.95730000   2.61863215
  0.95730000   1.82948548
  0.95740000   1.60326841
  0.95740000   2.54357934
  0.95740000   1.98699549
  0.95740000   2.77205883
  0.95740000   1.54426880
  0.95740000   2.47275733
  0.95740000   2.13686530
  0.95740000   2.68766490
  0.95740000   1.69126049
  0.95740000   2.63655938
  0.95740000   1.79318214
  0.95740000   2.71971311
  0.95740000   1.63365760
  0.95740000   2.57756734
  0.95740000   1.91510178
  0.95740000   2.77175415
  0.95740000   1.54495837
  0.95740000   2.47360686
  0.95740000   2.13503329
  0.95740000   2.68936202
  0.95740000   1.68801383
  0.95740000   2.63341988
  0.95740000   1.79947846
  0.95750000   1.67773124
  0.95750000   2.62468008
  0.95750000   1.81774352
  0.95750000   2.73604896
  0.95750000   1.60505133
  0.95750000   2.54680005
  0.95750000   1.98043580
  0.95750000   2.77412424
  0.95750000   1.54125464
  0.95750000   2.47014480
  0.95750000   2.14269032
  0.95750000   2.68282669
  0.95750000   1.70062425
  0.95750000   2.64659836
  0.95750000   1.77323178
  0.95750000   2.70711055
  0.95750000   1.65681786
  0.95750000   2.60340638
  0.95750000   1.86140378
  0.95750000   2.75731751
  0.95750000   1.56878345
  0.95750000   2.50404155
  0.95750000   2.07111435
  0.95760000   1.70250117
  0.95760000   2.64966657
  0.95760000   1.76756856
  0.95760000   2.70421409
  0.95760000   1.66250415
  0.95760000   2.61050509
  0.95760000   1.84706610
  0.95760000   2.75233569
  0.95760000   1.57741253
  0.95760000   2.51560870
  0.95760000   2.04695836
  0.95760000   2.75443167
  0.95760000   1.57311449
  0.95760000   2.51042390
  0.95760000   2.05786732
  0.95760000   2.74877865
  0.95760000   1.58248577
  0.95760000   2.52160742
  0.95760000   2.03407373
  0.95760000   2.76018195
  0.95760000   1.56363325
  0.95760000   2.49893749
  0.95760000   2.08219207
  0.95770000   1.64933131
  0.95770000   2.59798657
  0.95770000   1.87329534
  0.95770000   2.76417766
  0.95770000   1.55808400
  0.95770000   2.49336618
  0.95770000   2.09450185
  0.95770000   2.72630369
  0.95770000   1.62141073
  0.95770000   2.56760409
  0.95770000   1.93684344
  0.95770000   2.77773232
  0.95770000   1.53621532
  0.95770000   2.46612740
  0.95770000   2.15183475
  0.95770000   2.67521214
  0.95770000   1.71560381
  0.95770000   2.66266868
  0.95770000   1.74183883
  0.95770000   2.68524349
  0.95770000   1.69824735
  0.95770000   2.64684071
  0.95770000   1.77332970
  0.95780000   1.55823998
  0.95780000   2.49473382
  0.95780000   2.09197803
  0.95780000   2.72910009
  0.95780000   1.61675521
  0.95780000   2.56359068
  0.95780000   1.94563313
  0.95780000   2.77927771
  0.95780000   1.53405052
  0.95780000   2.46455814
  0.95780000   2.15551718
  0.95780000   2.67219549
  0.95780000   1.72165618
  0.95780000   2.66923063
  0.95780000   1.72925772
  0.95780000   2.67590266
  0.95780000   1.71641831
  0.95780000   2.66469220
  0.95780000   1.73824349
  0.95780000   2.68349633
  0.95780000   1.70185306
  0.95780000   2.65141896
  0.95780000   1.76445577
  0.95790000   1.54412823
  0.95790000   2.47840326
  0.95790000   2.12681609
  0.95790000   2.70140909
  0.95790000   1.66679312
  0.95790000   2.61839817
  0.95790000   1.83144335
  0.95790000   2.74817229
  0.95790000   1.58514905
  0.95790000   2.52833329
  0.95790000   2.02083367
  0.95790000   2.76835570
  0.95790000   1.55124179
  0.95790000   2.48723179
  0.95790000   2.10806222
  0.95790000   2.71752728
  0.95790000   1.63740891
  0.95790000   2.58753203
  0.95790000   1.89542391
  0.95790000   2.77313533
  0.95790000   1.54405589
  0.95790000   2.47829051
  0.95790000   2.12695640
  0.95800000   1.66390336
  0.95800000   2.61666195
  0.95800000   1.83530692
  0.95800000   2.75133830
  0.95800000   1.58008621
  0.95800000   2.52350791
  0.95800000   2.03144851
  0.95800000   2.76535493
  0.95800000   1.55629351
  0.95800000   2.49464433
  0.95800000   2.09272379
  0.95800000   2.73032879
  0.95800000   1.61500858
  0.95800000   2.56398011
  0.95800000   1.94531644
  0.95800000   2.78143079
  0.95800000   1.53119249
  0.95800000   2.46324487
  0.95800000   2.15897215
  0.95800000   2.67011100
  0.95800000   1.72610916
  0.95800000   2.67548958
  0.95800000   1.71755801
  0.95810000   1.72172336
  0.95810000   2.67292489
  0.95810000   1.72288558
  0.95810000   2.67402091
  0.95810000   1.72085106
  0.95810000   2.67224560
  0.95810000   1.72430107
  0.95810000   2.67526294
  0.95810000   1.71845163
  0.95810000   2.67012275
  0.95810000   1.72841358
  0.95810000   2.67881044
  0.95810000   1.71159418
  0.95810000   2.66397372
  0.95810000   1.74041088
  0.95810000   2.68889551
  0.95810000   1.69231925
  0.95810000   2.64603442
  0.95810000   1.77595566
  0.95810000   2.71624099
  0.95810000   1.64161181
  0.95810000   2.59450574
  0.95810000   1.88150045
  0.95820000   1.57097115
  0.95820000   2.51491012
  0.95820000   2.05036940
  0.95820000   2.75865242
  0.95820000   1.56763600
  0.95820000   2.51085817
  0.95820000   2.05894744
  0.95820000   2.75403894
  0.95820000   1.57518303
  0.95820000   2.51995916
  0.95820000   2.03952534
  0.95820000   2.76382511
  0.95820000   1.55919424
  0.95820000   2.50054029
  0.95820000   2.08084312
  0.95820000   2.74052808
  0.95820000   1.59784179
  0.95820000   2.54670367
  0.95820000   1.98252441
  0.95820000   2.78116704
  0.95820000   1.53196573
  0.95820000   2.46653846
  0.95820000   2.15277010
  0.95830000   1.58679465
  0.95830000   2.53502456
  0.95830000   2.00791790
  0.95830000   2.77665708
  0.95830000   1.53923248
  0.95830000   2.47691114
  0.95830000   2.13137527
  0.95830000   2.70063074
  0.95830000   1.66912788
  0.95830000   2.62554480
  0.95830000   1.81779145
  0.95830000   2.74545588
  0.95830000   1.59073917
  0.95830000   2.53963695
  0.95830000   1.99797861
  0.95830000   2.77920462
  0.95830000   1.53523464
  0.95830000   2.47184748
  0.95830000   2.14198381
  0.95830000   2.69027371
  0.95830000   1.68836245
  0.95830000   2.64453400
  0.95830000   1.77928321
  0.95840000   1.98333206
  0.95840000   2.78328836
  0.95840000   1.52934160
  0.95840000   2.46555375
  0.95840000   2.15571756
  0.95840000   2.67699335
  0.95840000   1.71387157
  0.95840000   2.66953339
  0.95840000   1.73014381
  0.95840000   2.68386941
  0.95840000   1.70258274
  0.95840000   2.65930605
  0.95840000   1.75030801
  0.95840000   2.70049414
  0.95840000   1.67124820
  0.95840000   2.62895114
  0.95840000   1.81120197
  0.95840000   2.74283488
  0.95840000   1.59547330
  0.95840000   2.54635742
  0.95840000   1.98396597
  0.95840000   2.78308999
  0.95840000   1.52954640
  0.95850000   2.16667424
  0.95850000   2.66581564
  0.95850000   1.73572553
  0.95850000   2.68970818
  0.95850000   1.69164880
  0.95850000   2.65019453
  0.95850000   1.76863692
  0.95850000   2.71572737
  0.95850000   1.64353839
  0.95850000   2.60136205
  0.95850000   1.86830902
  0.95850000   2.77158120
  0.95850000   1.54818347
  0.95850000   2.49045468
  0.95850000   2.10338115
  0.95850000   2.72674905
  0.95850000   1.62244637
  0.95850000   2.57825619
  0.95850000   1.91655187
  0.95850000   2.78431167
  0.95850000   1.52815662
  0.95850000   2.46517913
  0.95850000   2.15677553
  0.95860000   1.97742689
  0.95860000   2.78627145
  0.95860000   1.52531616
  0.95860000   2.46272823
  0.95860000   2.16239529
  0.95860000   2.67135905
  0.95860000   1.72516983
  0.95860000   2.68190244
  0.95860000   1.70671847
  0.95860000   2.66551475
  0.95860000   1.73856564
  0.95860000   2.69336302
  0.95860000   1.68506968
  0.95860000   2.64504337
  0.95860000   1.77916918
  0.95860000   2.72448254
  0.95860000   1.62802955
  0.95860000   2.58569051
  0.95860000   1.90130500
  0.95860000   2.78254730
  0.95860000   1.53119397
  0.95860000   2.47021547
  0.95860000   2.14655311
  0.95870000   1.73391440
  0.95870000   2.69069662
  0.95870000   1.69039001
  0.95870000   2.65141269
  0.95870000   1.76674222
  0.95870000   2.71673277
  0.95870000   1.64222540
  0.95870000   2.60235277
  0.95870000   1.86679066
  0.95870000   2.77334149
  0.95870000   1.54592551
  0.95870000   2.48997593
  0.95870000   2.10510530
  0.95870000   2.72718519
  0.95870000   1.62215760
  0.95870000   2.58031940
  0.95870000   1.91276262
  0.95870000   2.78594041
  0.95870000   1.52621970
  0.95870000   2.46502647
  0.95870000   2.15785210
  0.95870000   2.67708709
  0.95870000   1.71431080
  0.95880000   1.67177649
  0.95880000   2.63429533
  0.95880000   1.80138965
  0.95880000   2.74164097
  0.95880000   1.59856942
  0.95880000   2.55471941
  0.95880000   1.96742340
  0.95880000   2.78953206
  0.95880000   1.52094002
  0.95880000   2.45941820
  0.95880000   2.17007213
  0.95880000   2.66428578
  0.95880000   1.73933185
  0.95880000   2.69627364
  0.95880000   1.67993393
  0.95880000   2.64238745
  0.95880000   1.78494672
  0.95880000   2.73085091
  0.95880000   1.61723202
  0.95880000   2.57603700
  0.95880000   1.92216160
  0.95880000   2.78850591
  0.95880000   1.52258416
  0.95890000   1.78204127
  0.95890000   2.73008389
  0.95890000   1.61889834
  0.95890000   2.57912797
  0.95890000   1.91600518
  0.95890000   2.78879821
  0.95890000   1.52249131
  0.95890000   2.46258092
  0.95890000   2.16382731
  0.95890000   2.67219739
  0.95890000   1.72423592
  0.95890000   2.68468715
  0.95890000   1.70209364
  0.95890000   2.66483933
  0.95890000   1.74059302
  0.95890000   2.69863039
  0.95890000   1.67589818
  0.95890000   2.63960446
  0.95890000   1.79083166
  0.95890000   2.73600223
  0.95890000   1.60848609
  0.95890000   2.56730931
  0.95890000   1.94090182
  0.95900000   2.01558639
  0.95900000   2.78144038
  0.95900000   1.53359208
  0.95900000   2.47792603
  0.95900000   2.13174003
  0.95900000   2.70634079
  0.95900000   1.66026086
  0.95900000   2.62487208
  0.95900000   1.82093301
  0.95900000   2.75548646
  0.95900000   1.57563975
  0.95900000   2.52995733
  0.95900000   2.02077321
  0.95900000   2.77957436
  0.95900000   1.53639284
  0.95900000   2.48145884
  0.95900000   2.12416355
  0.95900000   2.71336566
  0.95900000   1.64743875
  0.95900000   2.61141890
  0.95900000   1.84855745
  0.95900000   2.76928242
  0.95900000   1.55310453
  0.95910000   2.17058693
  0.95910000   2.66617682
  0.95910000   1.73642459
  0.95910000   2.69749232
  0.95910000   1.67843216
  0.95910000   2.64452955
  0.95910000   1.78143671
  0.95910000   2.73204417
  0.95910000   1.61592025
  0.95910000   2.57814781
  0.95910000   1.91858251
  0.95910000   2.79141008
  0.95910000   1.51907956
  0.95910000   2.46049337
  0.95910000   2.16893915
  0.95910000   2.66799143
  0.95910000   1.73281586
  0.95910000   2.69442998
  0.95910000   1.68409805
  0.95910000   2.65007477
  0.95910000   1.77026428
  0.95910000   2.72406516
  0.95910000   1.62995527
  0.95920000   2.12529770
  0.95920000   2.71419444
  0.95920000   1.64651708
  0.95920000   2.61286923
  0.95920000   1.84617310
  0.95920000   2.77059595
  0.95920000   1.55160200
  0.95920000   2.50290760
  0.95920000   2.07925999
  0.95920000   2.75106331
  0.95920000   1.58251890
  0.95920000   2.54052536
  0.95920000   1.99871914
  0.95920000   2.78841066
  0.95920000   1.52352607
  0.95920000   2.46736975
  0.95920000   2.15474645
  0.95920000   2.68457787
  0.95920000   1.70120609
  0.95920000   2.66752979
  0.95920000   1.73591368
  0.95920000   2.69832724
  0.95920000   1.67713538
  0.95930000   1.91862919
  0.95930000   2.79371374
  0.95930000   1.51625866
  0.95930000   2.45917707
  0.95930000   2.17254317
  0.95930000   2.66548258
  0.95930000   1.73822242
  0.95930000   2.70137852
  0.95930000   1.67164565
  0.95930000   2.64014577
  0.95930000   1.79072857
  0.95930000   2.74070928
  0.95930000   1.60136269
  0.95930000   2.56387996
  0.95930000   1.94933631
  0.95930000   2.79577816
  0.95930000   1.51304953
  0.95930000   2.45498569
  0.95930000   2.18126103
  0.95930000   2.65501539
  0.95930000   1.75866847
  0.95930000   2.71764910
  0.95930000   1.64179776
  0.95940000   1.69721206
  0.95940000   2.66634053
  0.95940000   1.73898261
  0.95940000   2.70335522
  0.95940000   1.66840450
  0.95940000   2.63810519
  0.95940000   1.79517457
  0.95940000   2.74483012
  0.95940000   1.59460768
  0.95940000   2.55721669
  0.95940000   1.96383131
  0.95940000   2.79630214
  0.95940000   1.51252605
  0.95940000   2.45546586
  0.95940000   2.18065405
  0.95940000   2.65655639
  0.95940000   1.75588676
  0.95940000   2.71671460
  0.95940000   1.64374221
  0.95940000   2.61231880
  0.95940000   1.84782058
  0.95940000   2.77365158
  0.95940000   1.54723338
  0.95950000   1.57283367
  0.95950000   2.53250132
  0.95950000   2.01697314
  0.95950000   2.78610481
  0.95950000   1.52780305
  0.95950000   2.47636220
  0.95950000   2.13685116
  0.95950000   2.70566612
  0.95950000   1.66265664
  0.95950000   2.63334030
  0.95950000   1.80490653
  0.95950000   2.75208320
  0.95950000   1.58257013
  0.95950000   2.54416620
  0.95950000   1.99192061
  0.95950000   2.79318480
  0.95950000   1.51725585
  0.95950000   2.46275866
  0.95950000   2.16561436
  0.95950000   2.67499770
  0.95950000   1.72019957
  0.95950000   2.68835446
  0.95950000   1.69651386
  0.95960000   1.52795101
  0.95960000   2.47773779
  0.95960000   2.13437496
  0.95960000   2.70901119
  0.95960000   1.65682516
  0.95960000   2.62851825
  0.95960000   1.81501221
  0.95960000   2.75926282
  0.95960000   1.57095899
  0.95960000   2.53138961
  0.95960000   2.01958260
  0.95960000   2.78614215
  0.95960000   1.52795603
  0.95960000   2.47770840
  0.95960000   2.13429000
  0.95960000   2.70899906
  0.95960000   1.65676768
  0.95960000   2.62843185
  0.95960000   1.81511568
  0.95960000   2.75928860
  0.95960000   1.57086465
  0.95960000   2.53125906
  0.95960000   2.01980202
  0.95970000   1.51714406
  0.95970000   2.46496776
  0.95970000   2.16183690
  0.95970000   2.68100138
  0.95970000   1.70926944
  0.95970000   2.68101258
  0.95970000   1.71108352
  0.95970000   2.68274140
  0.95970000   1.70786707
  0.95970000   2.67982379
  0.95970000   1.71347578
  0.95970000   2.68491329
  0.95970000   1.70373103
  0.95970000   2.67601587
  0.95970000   1.72080833
  0.95970000   2.69143074
  0.95970000   1.69135297
  0.95970000   2.66434629
  0.95970000   1.74352708
  0.95970000   2.71065186
  0.95970000   1.65563435
  0.95970000   2.62852728
  0.95970000   1.81531005
  0.95980000   1.52187591
  0.95980000   2.47225283
  0.95980000   2.14675738
  0.95980000   2.69817905
  0.95980000   1.67719536
  0.95980000   2.65166025
  0.95980000   1.76878779
  0.95980000   2.73138799
  0.95980000   1.61877600
  0.95980000   2.58971743
  0.95980000   1.89610460
  0.95980000   2.79501475
  0.95980000   1.51571144
  0.95980000   2.46424789
  0.95980000   2.16364529
  0.95980000   2.67970562
  0.95980000   1.71190970
  0.95980000   2.68458531
  0.95980000   1.70442718
  0.95980000   2.67783172
  0.95980000   1.71748131
  0.95980000   2.68967701
  0.95980000   1.69487143
  0.95990000   1.55172231
  0.95990000   2.51129099
  0.95990000   2.06369405
  0.95990000   2.76778011
  0.95990000   1.55711919
  0.95990000   2.51795479
  0.95990000   2.04927660
  0.95990000   2.77588911
  0.95990000   1.54436233
  0.95990000   2.50203648
  0.95990000   2.08337661
  0.95990000   2.75474137
  0.95990000   1.57812283
  0.95990000   2.54354412
  0.95990000   1.99434653
  0.95990000   2.79680792
  0.95990000   1.51300682
  0.95990000   2.46187082
  0.95990000   2.16898124
  0.95990000   2.67435479
  0.95990000   1.72237539
  0.95990000   2.69507977
  0.95990000   1.68478420
  0.96000000   1.63762977
  0.96000000   2.61298069
  0.96000000   1.84815307
  0.96000000   2.78089571
  0.96000000   1.53763445
  0.96000000   2.49474513
  0.96000000   2.09945308
  0.96000000   2.74358620
  0.96000000   1.59701147
  0.96000000   2.56711294
  0.96000000   1.94436610
  0.96000000   2.80343929
  0.96000000   1.50392930
  0.96000000   2.45114686
  0.96000000   2.19205205
  0.96000000   2.64703570
  0.96000000   1.77618840
  0.96000000   2.73895515
  0.96000000   1.60595927
  0.96000000   2.57749440
  0.96000000   1.92235027
  0.96000000   2.80196392
  0.96000000   1.50607568
  0.96010000   1.80521090
  0.96010000   2.75947361
  0.96010000   1.57197470
  0.96010000   2.53854978
  0.96010000   2.00583656
  0.96010000   2.79590310
  0.96010000   1.51490497
  0.96010000   2.46668056
  0.96010000   2.15960286
  0.96010000   2.68672262
  0.96010000   1.69930655
  0.96010000   2.67661476
  0.96010000   1.72047771
  0.96010000   2.69594113
  0.96010000   1.68380152
  0.96010000   2.66185161
  0.96010000   1.74939479
  0.96010000   2.72017915
  0.96010000   1.63936635
  0.96010000   2.61602716
  0.96010000   1.84200277
  0.96010000   2.77921571
  0.96010000   1.54042666
  0.96020000   2.01367573
  0.96020000   2.79444742
  0.96020000   1.51730213
  0.96020000   2.47096545
  0.96020000   2.15088954
  0.96020000   2.69711765
  0.96020000   1.68008405
  0.96020000   2.65933355
  0.96020000   1.75451397
  0.96020000   2.72540034
  0.96020000   1.63030413
  0.96020000   2.60733691
  0.96020000   1.86029589
  0.96020000   2.78826466
  0.96020000   1.52690074
  0.96020000   2.48336133
  0.96020000   2.12442754
  0.96020000   2.72366286
  0.96020000   1.63189821
  0.96020000   2.60902064
  0.96020000   1.85664393
  0.96020000   2.78675989
  0.96020000   1.52912475
  0.96030000   2.16325436
  0.96030000   2.68431669
  0.96030000   1.70439830
  0.96030000   2.68378948
  0.96030000   1.70723221
  0.96030000   2.68647742
  0.96030000   1.70220157
  0.96030000   2.68184254
  0.96030000   1.71106466
  0.96030000   2.68998123
  0.96030000   1.69556388
  0.96030000   2.67560785
  0.96030000   1.72305982
  0.96030000   2.70064462
  0.96030000   1.67555077
  0.96030000   2.65611974
  0.96030000   1.76123673
  0.96030000   2.73177586
  0.96030000   1.61933209
  0.96030000   2.59631789
  0.96030000   1.88356026
  0.96030000   2.79738916
  0.96030000   1.51363533
  0.96040000   2.19309626
  0.96040000   2.64886431
  0.96040000   1.77360468
  0.96040000   2.74195345
  0.96040000   1.60189041
  0.96040000   2.57759095
  0.96040000   1.92332854
  0.96040000   2.80660903
  0.96040000   1.50066905
  0.96040000   2.45147549
  0.96040000   2.19294330
  0.96040000   2.64898939
  0.96040000   1.77328707
  0.96040000   2.74169511
  0.96040000   1.60227715
  0.96040000   2.57802089
  0.96040000   1.92235692
  0.96040000   2.80646408
  0.96040000   1.50083735
  0.96040000   2.45168669
  0.96040000   2.19244602
  0.96040000   2.64958533
  0.96040000   1.77206088
  0.96050000   2.09575034
  0.96050000   2.75111454
  0.96050000   1.58565418
  0.96050000   2.55968571
  0.96050000   1.96165661
  0.96050000   2.80839118
  0.96050000   1.49834672
  0.96050000   2.44955395
  0.96050000   2.19738188
  0.96050000   2.64398842
  0.96050000   1.78351589
  0.96050000   2.75004531
  0.96050000   1.58840223
  0.96050000   2.56295486
  0.96050000   1.95467775
  0.96050000   2.80878014
  0.96050000   1.49779423
  0.96050000   2.44880995
  0.96050000   2.19890053
  0.96050000   2.64194613
  0.96050000   1.78756426
  0.96050000   2.75275488
  0.96050000   1.58384369
  0.96060000   1.90587219
  0.96060000   2.80625319
  0.96060000   1.50181430
  0.96060000   2.45531426
  0.96060000   2.18564819
  0.96060000   2.65985481
  0.96060000   1.75232481
  0.96060000   2.72839163
  0.96060000   1.62590020
  0.96060000   2.60725020
  0.96060000   1.86149696
  0.96060000   2.79339081
  0.96060000   1.52037625
  0.96060000   2.47960521
  0.96060000   2.13388079
  0.96060000   2.71803530
  0.96060000   1.64285837
  0.96060000   2.62573379
  0.96060000   1.82316895
  0.96060000   2.77561710
  0.96060000   1.54734752
  0.96060000   2.51401536
  0.96060000   2.05998475
  0.96070000   1.71746745
  0.96070000   2.70056302
  0.96070000   1.67670897
  0.96070000   2.66212290
  0.96070000   1.75039803
  0.96070000   2.72823438
  0.96070000   1.62659012
  0.96070000   2.60924346
  0.96070000   1.85767518
  0.96070000   2.79308146
  0.96070000   1.52114223
  0.96070000   2.48177013
  0.96070000   2.12963047
  0.96070000   2.72308775
  0.96070000   1.63413333
  0.96070000   2.61747921
  0.96070000   1.84042909
  0.96070000   2.78551450
  0.96070000   1.53240583
  0.96070000   2.49625654
  0.96070000   2.09850755
  0.96070000   2.75067644
  0.96070000   1.58679701
  0.96080000   1.60504197
  0.96080000   2.58602783
  0.96080000   1.90661423
  0.96080000   2.80867108
  0.96080000   1.49900668
  0.96080000   2.45390734
  0.96080000   2.18938392
  0.96080000   2.65666542
  0.96080000   1.75907334
  0.96080000   2.73601043
  0.96080000   1.61308536
  0.96080000   2.59522518
  0.96080000   1.88716362
  0.96080000   2.80416256
  0.96080000   1.50532857
  0.96080000   2.46225497
  0.96080000   2.17160669
  0.96080000   2.67853633
  0.96080000   1.71650838
  0.96080000   2.70077662
  0.96080000   1.67634415
  0.96080000   2.66291443
  0.96080000   1.74896228
  0.96090000   1.56500999
  0.96090000   2.53950649
  0.96090000   2.00617276
  0.96090000   2.80410000
  0.96090000   1.50537499
  0.96090000   2.46347979
  0.96090000   2.16939165
  0.96090000   2.68199528
  0.96090000   1.71017937
  0.96090000   2.69631297
  0.96090000   1.68495070
  0.96090000   2.67262685
  0.96090000   1.73025155
  0.96090000   2.71408014
  0.96090000   1.65232789
  0.96090000   2.63950627
  0.96090000   1.79600772
  0.96090000   2.76324323
  0.96090000   1.56784781
  0.96090000   2.54297089
  0.96090000   1.99867077
  0.96090000   2.80622998
  0.96090000   1.50235479
  0.96100000   1.57511017
  0.96100000   2.55300568
  0.96100000   1.97749371
  0.96100000   2.81192822
  0.96100000   1.49488024
  0.96100000   2.45072604
  0.96100000   2.19686674
  0.96100000   2.64848378
  0.96100000   1.77577257
  0.96100000   2.75067740
  0.96100000   1.58863857
  0.96100000   2.56919362
  0.96100000   1.94280956
  0.96100000   2.81446887
  0.96100000   1.49147989
  0.96100000   2.44617386
  0.96100000   2.20644046
  0.96100000   2.63561017
  0.96100000   1.80156164
  0.96100000   2.76772156
  0.96100000   1.56075766
  0.96100000   2.53541972
  0.96100000   2.01513897
  0.96110000   1.63864741
  0.96110000   2.62729164
  0.96110000   1.82144072
  0.96110000   2.78068253
  0.96110000   1.54095086
  0.96110000   2.51185241
  0.96110000   2.06636580
  0.96110000   2.77765169
  0.96110000   1.54475920
  0.96110000   2.51663446
  0.96110000   2.05594108
  0.96110000   2.78393757
  0.96110000   1.53517139
  0.96110000   2.50446300
  0.96110000   2.08214561
  0.96110000   2.76686249
  0.96110000   1.56154319
  0.96110000   2.53755810
  0.96110000   2.01080174
  0.96110000   2.80458353
  0.96110000   1.50517489
  0.96110000   2.46551516
  0.96110000   2.16570584
  0.96120000   1.77025275
  0.96120000   2.74930730
  0.96120000   1.59162295
  0.96120000   2.57514490
  0.96120000   1.93080225
  0.96120000   2.81626291
  0.96120000   1.48973010
  0.96120000   2.44615290
  0.96120000   2.20733610
  0.96120000   2.63592785
  0.96120000   1.80146084
  0.96120000   2.77006928
  0.96120000   1.55759118
  0.96120000   2.53387532
  0.96120000   2.01911571
  0.96120000   2.80264745
  0.96120000   1.50818313
  0.96120000   2.47064501
  0.96120000   2.15513535
  0.96120000   2.70071451
  0.96120000   1.67573216
  0.96120000   2.66706529
  0.96120000   1.74168434
  0.96130000   1.94961908
  0.96130000   2.81778360
  0.96130000   1.48794329
  0.96130000   2.44491186
  0.96130000   2.21036982
  0.96130000   2.63250909
  0.96130000   1.80865110
  0.96130000   2.77560567
  0.96130000   1.54918052
  0.96130000   2.52456456
  0.96130000   2.03951439
  0.96130000   2.79473423
  0.96130000   1.51976693
  0.96130000   2.48696349
  0.96130000   2.12050402
  0.96130000   2.73697001
  0.96130000   1.61139225
  0.96130000   2.59923657
  0.96130000   1.87995851
  0.96130000   2.80782399
  0.96130000   1.50161711
  0.96130000   2.46314129
  0.96130000   2.17156402
  0.96140000   2.11122973
  0.96140000   2.74637183
  0.96140000   1.59579728
  0.96140000   2.58240115
  0.96140000   1.91583029
  0.96140000   2.81693351
  0.96140000   1.48944400
  0.96140000   2.44807575
  0.96140000   2.20404321
  0.96140000   2.64190462
  0.96140000   1.78990815
  0.96140000   2.76511041
  0.96140000   1.56602996
  0.96140000   2.54665976
  0.96140000   1.99220713
  0.96140000   2.81314362
  0.96140000   1.49429286
  0.96140000   2.45455020
  0.96140000   2.19021926
  0.96140000   2.66015076
  0.96140000   1.75359922
  0.96140000   2.73900358
  0.96140000   1.60939168
  0.96150000   2.20118934
  0.96150000   2.64658076
  0.96150000   1.78084868
  0.96150000   2.76024949
  0.96150000   1.57419667
  0.96150000   2.55783135
  0.96150000   1.96857075
  0.96150000   2.81855711
  0.96150000   1.48742540
  0.96150000   2.44651208
  0.96150000   2.20771889
  0.96150000   2.63760852
  0.96150000   1.79879102
  0.96150000   2.77199245
  0.96150000   1.55535054
  0.96150000   2.53463443
  0.96150000   2.01839012
  0.96150000   2.80599026
  0.96150000   1.50434004
  0.96150000   2.46905990
  0.96150000   2.15962003
  0.96150000   2.69813412
  0.96150000   1.68121891
  0.96160000   2.20490810
  0.96160000   2.64230510
  0.96160000   1.78966733
  0.96160000   2.76738263
  0.96160000   1.56297681
  0.96160000   2.54529109
  0.96160000   1.99580451
  0.96160000   2.81437609
  0.96160000   1.49323545
  0.96160000   2.45546081
  0.96160000   2.18909316
  0.96160000   2.66318642
  0.96160000   1.74816558
  0.96160000   2.73716059
  0.96160000   1.61309819
  0.96160000   2.60482896
  0.96160000   1.86914057
  0.96160000   2.80782420
  0.96160000   1.50253339
  0.96160000   2.46784339
  0.96160000   2.16265322
  0.96160000   2.69549793
  0.96160000   1.68637358
  0.96170000   2.12338986
  0.96170000   2.73790493
  0.96170000   1.61088350
  0.96170000   2.60348686
  0.96170000   1.87221160
  0.96170000   2.81005738
  0.96170000   1.49977254
  0.96170000   2.46535289
  0.96170000   2.16841565
  0.96170000   2.68961064
  0.96170000   1.69768350
  0.96170000   2.69444357
  0.96170000   1.69041081
  0.96170000   2.68760279
  0.96170000   1.70343006
  0.96170000   2.69991181
  0.96170000   1.68030989
  0.96170000   2.67777085
  0.96170000   1.72226952
[truncated: 221,859 more chars]
