# Supplementary material for: Bifurcations of a New Fractional-Order System with a One-Scroll Chaotic Attractor
Source: Hindawi journal article supplement (doi:10.1155/2019/8341514), 2019-01-01
Supplement: f1 [file 8341514.f1.zip › 8341514.f1/q1-bifurcationdata/q1dataq097.dat]

  0.90000000   2.24004842
  0.90000000   2.24005807
  0.90000000   2.24004058
  0.90000000   2.24004340
  0.90000000   2.24003237
  0.90000000   2.24003192
  0.90000000   2.24002445
  0.90000000   2.24002254
  0.90000000   2.24001711
  0.90000000   2.24001463
  0.90000000   2.24001041
  0.90000000   2.24000779
  0.90000000   2.24000435
  0.90000000   2.24000178
  0.90000000   2.23999886
  0.90000000   2.23999644
  0.90000000   2.23999389
  0.90000000   2.23999164
  0.90000000   2.23998937
  0.90000000   2.23998730
  0.90000000   2.23998525
  0.90000000   2.23998335
  0.90000000   2.23998149
  0.90010000   2.24045805
  0.90010000   2.24047256
  0.90010000   2.24045152
  0.90010000   2.24045693
  0.90010000   2.24044400
  0.90010000   2.24044493
  0.90010000   2.24043645
  0.90010000   2.24043528
  0.90010000   2.24042931
  0.90010000   2.24042722
  0.90010000   2.24042272
  0.90010000   2.24042031
  0.90010000   2.24041671
  0.90010000   2.24041426
  0.90010000   2.24041125
  0.90010000   2.24040889
  0.90010000   2.24040629
  0.90010000   2.24040408
  0.90010000   2.24040178
  0.90010000   2.24039973
  0.90010000   2.24039767
  0.90010000   2.24039577
  0.90010000   2.24039390
  0.90020000   2.24086612
  0.90020000   2.24088626
  0.90020000   2.24086108
  0.90020000   2.24086954
  0.90020000   2.24085437
  0.90020000   2.24085695
  0.90020000   2.24084726
  0.90020000   2.24084697
  0.90020000   2.24084035
  0.90020000   2.24083874
  0.90020000   2.24083388
  0.90020000   2.24083173
  0.90020000   2.24082794
  0.90020000   2.24082563
  0.90020000   2.24082252
  0.90020000   2.24082023
  0.90020000   2.24081758
  0.90020000   2.24081540
  0.90020000   2.24081308
  0.90020000   2.24081104
  0.90020000   2.24080897
  0.90020000   2.24080708
  0.90020000   2.24080521
  0.90030000   2.24127260
  0.90030000   2.24129924
  0.90030000   2.24126925
  0.90030000   2.24128126
  0.90030000   2.24126346
  0.90030000   2.24126798
  0.90030000   2.24125685
  0.90030000   2.24125763
  0.90030000   2.24125022
  0.90030000   2.24124919
  0.90030000   2.24124391
  0.90030000   2.24124207
  0.90030000   2.24123804
  0.90030000   2.24123590
  0.90030000   2.24123266
  0.90030000   2.24123047
  0.90030000   2.24122775
  0.90030000   2.24122562
  0.90030000   2.24122326
  0.90030000   2.24122125
  0.90030000   2.24121916
  0.90030000   2.24121729
  0.90030000   2.24121540
  0.90040000   2.24167742
  0.90040000   2.24171154
  0.90040000   2.24167598
  0.90040000   2.24169213
  0.90040000   2.24167125
  0.90040000   2.24167806
  0.90040000   2.24166524
  0.90040000   2.24166727
  0.90040000   2.24165893
  0.90040000   2.24165859
  0.90040000   2.24165279
  0.90040000   2.24165133
  0.90040000   2.24164702
  0.90040000   2.24164509
  0.90040000   2.24164170
  0.90040000   2.24163962
  0.90040000   2.24163681
  0.90040000   2.24163475
  0.90040000   2.24163234
  0.90040000   2.24163037
  0.90040000   2.24162824
  0.90040000   2.24162639
  0.90040000   2.24162449
  0.90050000   2.24208054
  0.90050000   2.24212322
  0.90050000   2.24208125
  0.90050000   2.24210219
  0.90050000   2.24207773
  0.90050000   2.24208721
  0.90050000   2.24207239
  0.90050000   2.24207591
  0.90050000   2.24206645
  0.90050000   2.24206694
  0.90050000   2.24206053
  0.90050000   2.24205953
  0.90050000   2.24205488
  0.90050000   2.24205320
  0.90050000   2.24204961
  0.90050000   2.24204768
  0.90050000   2.24204476
  0.90050000   2.24204278
  0.90050000   2.24204031
  0.90050000   2.24203838
  0.90050000   2.24203623
  0.90050000   2.24203440
  0.90050000   2.24203248
  0.90060000   2.24248187
  0.90060000   2.24253433
  0.90060000   2.24248501
  0.90060000   2.24251148
  0.90060000   2.24248286
  0.90060000   2.24249546
  0.90060000   2.24247830
  0.90060000   2.24248358
  0.90060000   2.24247280
  0.90060000   2.24247428
  0.90060000   2.24246712
  0.90060000   2.24246667
  0.90060000   2.24246161
  0.90060000   2.24246024
  0.90060000   2.24245642
  0.90060000   2.24245466
  0.90060000   2.24245161
  0.90060000   2.24244972
  0.90060000   2.24244718
  0.90060000   2.24244531
  0.90060000   2.24244311
  0.90060000   2.24244131
  0.90060000   2.24243937
  0.90070000   2.24288136
  0.90070000   2.24294495
  0.90070000   2.24288721
  0.90070000   2.24292004
  0.90070000   2.24288662
  0.90070000   2.24290285
  0.90070000   2.24288294
  0.90070000   2.24289029
  0.90070000   2.24287795
  0.90070000   2.24288060
  0.90070000   2.24287256
  0.90070000   2.24287278
  0.90070000   2.24286721
  0.90070000   2.24286622
  0.90070000   2.24286212
  0.90070000   2.24286057
  0.90070000   2.24285736
  0.90070000   2.24285559
  0.90070000   2.24285296
  0.90070000   2.24285115
  0.90070000   2.24284890
  0.90070000   2.24284714
  0.90070000   2.24284517
  0.90080000   2.24327892
  0.90080000   2.24335515
  0.90080000   2.24328781
  0.90080000   2.24332793
  0.90080000   2.24328897
  0.90080000   2.24330940
  0.90080000   2.24328631
  0.90080000   2.24329606
  0.90080000   2.24328190
  0.90080000   2.24328593
  0.90080000   2.24327684
  0.90080000   2.24327785
  0.90080000   2.24327169
  0.90080000   2.24327115
  0.90080000   2.24326670
  0.90080000   2.24326541
  0.90080000   2.24326201
  0.90080000   2.24326038
  0.90080000   2.24325764
  0.90080000   2.24325592
  0.90080000   2.24325361
  0.90080000   2.24325189
  0.90080000   2.24324988
  0.90090000   2.24367447
  0.90090000   2.24376501
  0.90090000   2.24368674
  0.90090000   2.24373520
  0.90090000   2.24368988
  0.90090000   2.24371515
  0.90090000   2.24368837
  0.90090000   2.24370094
  0.90090000   2.24368463
  0.90090000   2.24369029
  0.90090000   2.24367996
  0.90090000   2.24368191
  0.90090000   2.24367503
  0.90090000   2.24367503
  0.90090000   2.24367018
  0.90090000   2.24366920
  0.90090000   2.24366556
  0.90090000   2.24366411
  0.90090000   2.24366123
  0.90090000   2.24365961
  0.90090000   2.24365722
  0.90090000   2.24365556
  0.90090000   2.24365351
  0.90100000   2.24406791
  0.90100000   2.24417462
  0.90100000   2.24408394
  0.90100000   2.24414191
  0.90100000   2.24408930
  0.90100000   2.24412016
  0.90100000   2.24408910
  0.90100000   2.24410494
  0.90100000   2.24408613
  0.90100000   2.24409370
  0.90100000   2.24408191
  0.90100000   2.24408498
  0.90100000   2.24407724
  0.90100000   2.24407789
  0.90100000   2.24407254
  0.90100000   2.24407194
  0.90100000   2.24406801
  0.90100000   2.24406679
  0.90100000   2.24406374
  0.90100000   2.24406224
  0.90100000   2.24405975
  0.90100000   2.24405817
  0.90100000   2.24405606
  0.90110000   2.24445915
  0.90110000   2.24458407
  0.90110000   2.24447934
  0.90110000   2.24454814
  0.90110000   2.24448718
  0.90110000   2.24452447
  0.90110000   2.24448846
  0.90110000   2.24450810
  0.90110000   2.24448637
  0.90110000   2.24449618
  0.90110000   2.24448267
  0.90110000   2.24448706
  0.90110000   2.24447831
  0.90110000   2.24447974
  0.90110000   2.24447379
  0.90110000   2.24447364
  0.90110000   2.24446936
  0.90110000   2.24446841
  0.90110000   2.24446515
  0.90110000   2.24446381
  0.90110000   2.24446121
  0.90110000   2.24445971
  0.90110000   2.24445753
  0.90120000   2.24484806
  0.90120000   2.24499346
  0.90120000   2.24487286
  0.90120000   2.24495395
  0.90120000   2.24488348
  0.90120000   2.24492812
  0.90120000   2.24488643
  0.90120000   2.24491046
  0.90120000   2.24488535
  0.90120000   2.24489777
  0.90120000   2.24488224
  0.90120000   2.24488818
  0.90120000   2.24487823
  0.90120000   2.24488058
  0.90120000   2.24487392
  0.90120000   2.24487432
  0.90120000   2.24486962
  0.90120000   2.24486899
  0.90120000   2.24486549
  0.90120000   2.24486433
  0.90120000   2.24486158
  0.90120000   2.24486020
  0.90120000   2.24485793
  0.90130000   2.24523452
  0.90130000   2.24540292
  0.90130000   2.24526441
  0.90130000   2.24535943
  0.90130000   2.24527814
  0.90130000   2.24533118
  0.90130000   2.24528297
  0.90130000   2.24531206
  0.90130000   2.24528301
  0.90130000   2.24529848
  0.90130000   2.24528060
  0.90130000   2.24528836
  0.90130000   2.24527700
  0.90130000   2.24528044
  0.90130000   2.24527294
  0.90130000   2.24527398
  0.90130000   2.24526878
  0.90130000   2.24526853
  0.90130000   2.24526473
  0.90130000   2.24526381
  0.90130000   2.24526088
  0.90130000   2.24525964
  0.90130000   2.24525726
  0.90140000   2.24561841
  0.90140000   2.24581255
  0.90140000   2.24565390
  0.90140000   2.24576467
  0.90140000   2.24567108
  0.90140000   2.24573372
  0.90140000   2.24567802
  0.90140000   2.24571294
  0.90140000   2.24567935
  0.90140000   2.24569836
  0.90140000   2.24567772
  0.90140000   2.24568762
  0.90140000   2.24567460
  0.90140000   2.24567933
  0.90140000   2.24567082
  0.90140000   2.24567265
  0.90140000   2.24566684
  0.90140000   2.24566706
  0.90140000   2.24566290
  0.90140000   2.24566226
  0.90140000   2.24565911
  0.90140000   2.24565803
  0.90140000   2.24565553
  0.90150000   2.24599957
  0.90150000   2.24622250
  0.90150000   2.24604123
  0.90150000   2.24616976
  0.90150000   2.24606223
  0.90150000   2.24613580
  0.90150000   2.24607154
  0.90150000   2.24611316
  0.90150000   2.24607433
  0.90150000   2.24609743
  0.90150000   2.24607359
  0.90150000   2.24608599
  0.90150000   2.24607102
  0.90150000   2.24607727
  0.90150000   2.24606758
  0.90150000   2.24607032
  0.90150000   2.24606380
  0.90150000   2.24606458
  0.90150000   2.24605998
  0.90150000   2.24605968
  0.90150000   2.24605626
  0.90150000   2.24605539
  0.90150000   2.24605273
  0.90160000   2.24637785
  0.90160000   2.24663290
  0.90160000   2.24642628
  0.90160000   2.24657481
  0.90160000   2.24645151
  0.90160000   2.24653750
  0.90160000   2.24646347
  0.90160000   2.24651277
  0.90160000   2.24646790
  0.90160000   2.24649574
  0.90160000   2.24646818
  0.90160000   2.24648350
  0.90160000   2.24646624
  0.90160000   2.24647428
  0.90160000   2.24646319
  0.90160000   2.24646703
  0.90160000   2.24645965
  0.90160000   2.24646110
  0.90160000   2.24645597
  0.90160000   2.24645608
  0.90160000   2.24645235
  0.90160000   2.24645172
  0.90160000   2.24644886
  0.90170000   2.24675308
  0.90170000   2.24704392
  0.90170000   2.24680892
  0.90170000   2.24697994
  0.90170000   2.24683884
  0.90170000   2.24693890
  0.90170000   2.24685374
  0.90170000   2.24691183
  0.90170000   2.24686003
  0.90170000   2.24689334
  0.90170000   2.24686147
  0.90170000   2.24688018
  0.90170000   2.24686025
  0.90170000   2.24687039
  0.90170000   2.24685764
  0.90170000   2.24686279
  0.90170000   2.24685438
  0.90170000   2.24685663
  0.90170000   2.24685087
  0.90170000   2.24685148
  0.90170000   2.24684735
  0.90170000   2.24684704
  0.90170000   2.24684394
  0.90180000   2.24712507
  0.90180000   2.24745572
  0.90180000   2.24718901
  0.90180000   2.24738527
  0.90180000   2.24722410
  0.90180000   2.24734011
  0.90180000   2.24724229
  0.90180000   2.24731042
  0.90180000   2.24725066
  0.90180000   2.24729027
  0.90180000   2.24725341
  0.90180000   2.24727607
  0.90180000   2.24725301
  0.90180000   2.24726563
  0.90180000   2.24725093
  0.90180000   2.24725761
  0.90180000   2.24724799
  0.90180000   2.24725120
  0.90180000   2.24724469
  0.90180000   2.24724588
  0.90180000   2.24724129
  0.90180000   2.24724134
  0.90180000   2.24723795
  0.90190000   2.24749363
  0.90190000   2.24786849
  0.90190000   2.24756640
  0.90190000   2.24779094
  0.90190000   2.24760720
  0.90190000   2.24774122
  0.90190000   2.24762904
  0.90190000   2.24770861
  0.90190000   2.24763974
  0.90190000   2.24768660
  0.90190000   2.24764397
  0.90190000   2.24767121
  0.90190000   2.24764452
  0.90190000   2.24766001
  0.90190000   2.24764302
  0.90190000   2.24765152
  0.90190000   2.24764046
  0.90190000   2.24764481
  0.90190000   2.24763740
  0.90190000   2.24763931
  0.90190000   2.24763415
  0.90190000   2.24763464
  0.90190000   2.24763090
  0.90200000   2.24785853
  0.90200000   2.24828241
  0.90200000   2.24794094
  0.90200000   2.24819710
  0.90200000   2.24798799
  0.90200000   2.24814235
  0.90200000   2.24801388
  0.90200000   2.24810649
  0.90200000   2.24802720
  0.90200000   2.24808238
  0.90200000   2.24803311
  0.90200000   2.24806564
  0.90200000   2.24803473
  0.90200000   2.24805359
  0.90200000   2.24803392
  0.90200000   2.24804455
  0.90200000   2.24803179
  0.90200000   2.24803749
  0.90200000   2.24802900
  0.90200000   2.24803176
  0.90200000   2.24802593
  0.90200000   2.24802696
  0.90200000   2.24802279
  0.90210000   2.24821955
  0.90210000   2.24869772
  0.90210000   2.24831243
  0.90210000   2.24860393
  0.90210000   2.24836636
  0.90210000   2.24854362
  0.90210000   2.24839674
  0.90210000   2.24850414
  0.90210000   2.24841297
  0.90210000   2.24847768
  0.90210000   2.24842077
  0.90210000   2.24845943
  0.90210000   2.24842360
  0.90210000   2.24844639
  0.90210000   2.24842358
  0.90210000   2.24843672
  0.90210000   2.24842195
  0.90210000   2.24842925
  0.90210000   2.24841949
  0.90210000   2.24842327
  0.90210000   2.24841662
  0.90210000   2.24841830
  0.90210000   2.24841362
  0.90220000   2.24857644
  0.90220000   2.24911462
  0.90220000   2.24868069
  0.90220000   2.24901159
  0.90220000   2.24874214
  0.90220000   2.24894517
  0.90220000   2.24877748
  0.90220000   2.24890167
  0.90220000   2.24879696
  0.90220000   2.24887258
  0.90220000   2.24880689
  0.90220000   2.24885261
  0.90220000   2.24881111
  0.90220000   2.24883846
  0.90220000   2.24881198
  0.90220000   2.24882807
  0.90220000   2.24881094
  0.90220000   2.24882013
  0.90220000   2.24880885
  0.90220000   2.24881384
  0.90220000   2.24880622
  0.90220000   2.24880868
  0.90220000   2.24880337
  0.90230000   2.24892892
  0.90230000   2.24953337
  0.90230000   2.24904550
  0.90230000   2.24942028
  0.90230000   2.24911519
  0.90230000   2.24934716
  0.90230000   2.24915600
  0.90230000   2.24929920
  0.90230000   2.24917910
  0.90230000   2.24926718
  0.90230000   2.24919141
  0.90230000   2.24924527
  0.90230000   2.24919720
  0.90230000   2.24922985
  0.90230000   2.24919910
  0.90230000   2.24921862
  0.90230000   2.24919872
  0.90230000   2.24921015
  0.90230000   2.24919706
  0.90230000   2.24920351
  0.90230000   2.24919472
  0.90230000   2.24919812
  0.90230000   2.24919205
  0.90240000   2.24927671
  0.90240000   2.24995424
  0.90240000   2.24940664
  0.90240000   2.24983022
  0.90240000   2.24948531
  0.90240000   2.24974973
  0.90240000   2.24953215
  0.90240000   2.24969686
  0.90240000   2.24955927
  0.90240000   2.24966155
  0.90240000   2.24957425
  0.90240000   2.24963747
  0.90240000   2.24958181
  0.90240000   2.24962061
  0.90240000   2.24958488
  0.90240000   2.24960843
  0.90240000   2.24958527
  0.90240000   2.24959933
  0.90240000   2.24958412
  0.90240000   2.24959228
  0.90240000   2.24958211
  0.90240000   2.24958662
  0.90240000   2.24957966
  0.90250000   2.24961949
  0.90250000   2.25037751
  0.90250000   2.24976384
  0.90250000   2.25024162
  0.90250000   2.24985232
  0.90250000   2.25015309
  0.90250000   2.24990578
  0.90250000   2.25009478
  0.90250000   2.24993737
  0.90250000   2.25005582
  0.90250000   2.24995534
  0.90250000   2.25002929
  0.90250000   2.24996489
  0.90250000   2.25001080
  0.90250000   2.24996929
  0.90250000   2.24999753
  0.90250000   2.24997056
  0.90250000   2.24998772
  0.90250000   2.24996999
  0.90250000   2.24998019
  0.90250000   2.24996837
  0.90250000   2.24997422
  0.90250000   2.24996617
  0.90260000   2.24995694
  0.90260000   2.25080349
  0.90260000   2.25011685
  0.90260000   2.25065475
  0.90260000   2.25021600
  0.90260000   2.25055742
  0.90260000   2.25027674
  0.90260000   2.25049312
  0.90260000   2.25031326
  0.90260000   2.25045009
  0.90260000   2.25033457
  0.90260000   2.25042082
  0.90260000   2.25034637
  0.90260000   2.25040049
  0.90260000   2.25035227
  0.90260000   2.25038599
  0.90260000   2.25035456
  0.90260000   2.25037535
  0.90260000   2.25035466
  0.90260000   2.25036727
  0.90260000   2.25035348
  0.90260000   2.25036093
  0.90260000   2.25035158
  0.90270000   2.25028870
  0.90270000   2.25123251
  0.90270000   2.25046537
  0.90270000   2.25106987
  0.90270000   2.25057611
  0.90270000   2.25096293
  0.90270000   2.25064482
  0.90270000   2.25089204
  0.90270000   2.25068680
  0.90270000   2.25084451
  0.90270000   2.25071183
  0.90270000   2.25081217
  0.90270000   2.25072616
  0.90270000   2.25078975
  0.90270000   2.25073377
  0.90270000   2.25077385
  0.90270000   2.25073721
  0.90270000   2.25076226
  0.90270000   2.25073809
  0.90270000   2.25075354
  0.90270000   2.25073743
  0.90270000   2.25074677
  0.90270000   2.25073588
  0.90280000   2.25061439
  0.90280000   2.25166491
  0.90280000   2.25080909
  0.90280000   2.25148726
  0.90280000   2.25093240
  0.90280000   2.25136987
  0.90280000   2.25100984
  0.90280000   2.25129174
  0.90280000   2.25105784
  0.90280000   2.25123921
  0.90280000   2.25108701
  0.90280000   2.25120345
  0.90280000   2.25110417
  0.90280000   2.25117869
  0.90280000   2.25111372
  0.90280000   2.25116119
  0.90280000   2.25111848
  0.90280000   2.25114851
  0.90280000   2.25112025
  0.90280000   2.25113906
  0.90280000   2.25112019
  0.90280000   2.25113179
  0.90280000   2.25111905
  0.90290000   2.25093360
  0.90290000   2.25210108
  0.90290000   2.25114766
  0.90290000   2.25190726
  0.90290000   2.25128460
  0.90290000   2.25177849
  0.90290000   2.25137157
  0.90290000   2.25169241
  0.90290000   2.25142621
  0.90290000   2.25163436
  0.90290000   2.25145998
  0.90290000   2.25159478
  0.90290000   2.25148031
  0.90290000   2.25156738
  0.90290000   2.25149204
  0.90290000   2.25154807
  0.90290000   2.25149829
  0.90290000   2.25153415
  0.90290000   2.25150109
  0.90290000   2.25152386
  0.90290000   2.25150173
  0.90290000   2.25151602
  0.90290000   2.25150106
  0.90300000   2.25124589
  0.90300000   2.25254143
  0.90300000   2.25148071
  0.90300000   2.25233018
  0.90300000   2.25163239
  0.90300000   2.25218907
  0.90300000   2.25172976
  0.90300000   2.25209429
  0.90300000   2.25179170
  0.90300000   2.25203014
  0.90300000   2.25183057
  0.90300000   2.25198630
  0.90300000   2.25185445
  0.90300000   2.25195595
  0.90300000   2.25186865
  0.90300000   2.25193459
  0.90300000   2.25187660
  0.90300000   2.25191926
  0.90300000   2.25188057
  0.90300000   2.25190799
  0.90300000   2.25188202
  0.90300000   2.25189948
  0.90300000   2.25188190
  0.90310000   2.25155082
  0.90310000   2.25298637
  0.90310000   2.25180786
  0.90310000   2.25275641
  0.90310000   2.25197546
  0.90310000   2.25260191
  0.90310000   2.25208415
  0.90310000   2.25249762
  0.90310000   2.25215411
  0.90310000   2.25242675
  0.90310000   2.25219862
  0.90310000   2.25237818
  0.90310000   2.25222647
  0.90310000   2.25234451
  0.90310000   2.25224343
  0.90310000   2.25232084
  0.90310000   2.25225332
  0.90310000   2.25230390
  0.90310000   2.25225862
  0.90310000   2.25229151
  0.90310000   2.25226100
  0.90310000   2.25228222
  0.90310000   2.25226153
  0.90320000   2.25184787
  0.90320000   2.25343637
  0.90320000   2.25212869
  0.90320000   2.25318633
  0.90320000   2.25231344
  0.90320000   2.25301735
  0.90320000   2.25243445
  0.90320000   2.25290267
  0.90320000   2.25251319
  0.90320000   2.25282440
  0.90320000   2.25256395
  0.90320000   2.25277058
  0.90320000   2.25259621
  0.90320000   2.25273321
  0.90320000   2.25261629
  0.90320000   2.25270693
  0.90320000   2.25262836
  0.90320000   2.25268816
  0.90320000   2.25263520
  0.90320000   2.25267449
  0.90320000   2.25263864
  0.90320000   2.25266431
  0.90320000   2.25263991
  0.90330000   2.25213653
  0.90330000   2.25389193
  0.90330000   2.25244272
  0.90330000   2.25362037
  0.90330000   2.25264595
  0.90330000   2.25343573
  0.90330000   2.25278033
  0.90330000   2.25330974
  0.90330000   2.25286869
  0.90330000   2.25322335
  0.90330000   2.25292634
  0.90330000   2.25316371
  0.90330000   2.25296352
  0.90330000   2.25312220
  0.90330000   2.25298708
  0.90330000   2.25309298
  0.90330000   2.25300162
  0.90330000   2.25307213
  0.90330000   2.25301020
  0.90330000   2.25305699
  0.90330000   2.25301488
  0.90330000   2.25304578
  0.90330000   2.25301701
  0.90340000   2.25241624
  0.90340000   2.25435356
  0.90340000   2.25274948
  0.90340000   2.25405899
  0.90340000   2.25297258
  0.90340000   2.25385746
  0.90340000   2.25312145
  0.90340000   2.25371916
  0.90340000   2.25322032
  0.90340000   2.25362384
  0.90340000   2.25328556
  0.90340000   2.25355778
  0.90340000   2.25332819
  0.90340000   2.25351165
  0.90340000   2.25335566
  0.90340000   2.25347913
  0.90340000   2.25337299
  0.90340000   2.25345592
  0.90340000   2.25338356
  0.90340000   2.25343912
  0.90340000   2.25338964
  0.90340000   2.25342672
  0.90340000   2.25339277
  0.90350000   2.25268641
  0.90350000   2.25482182
  0.90350000   2.25304845
  0.90350000   2.25450267
  0.90350000   2.25329286
  0.90350000   2.25428295
  0.90350000   2.25345741
  0.90350000   2.25413127
  0.90350000   2.25356777
  0.90350000   2.25402619
  0.90350000   2.25364135
  0.90350000   2.25395302
  0.90350000   2.25369004
  0.90350000   2.25390175
  0.90350000   2.25372187
  0.90350000   2.25386553
  0.90350000   2.25374234
  0.90350000   2.25383967
  0.90350000   2.25375516
  0.90350000   2.25382095
  0.90350000   2.25376285
  0.90350000   2.25380720
  0.90350000   2.25376713
  0.90360000   2.25294641
  0.90360000   2.25529730
  0.90360000   2.25333905
  0.90360000   2.25495194
  0.90360000   2.25360631
  0.90360000   2.25471265
  0.90360000   2.25378782
  0.90360000   2.25454647
  0.90360000   2.25391067
  0.90360000   2.25443070
  0.90360000   2.25399343
  0.90360000   2.25434971
  0.90360000   2.25404881
  0.90360000   2.25429274
  0.90360000   2.25408552
  0.90360000   2.25425236
  0.90360000   2.25410952
  0.90360000   2.25422350
  0.90360000   2.25412489
  0.90360000   2.25420262
  0.90360000   2.25413442
  0.90360000   2.25418730
  0.90360000   2.25414002
  0.90370000   2.25319558
  0.90370000   2.25578062
  0.90370000   2.25362070
  0.90370000   2.25540736
  0.90370000   2.25391241
  0.90370000   2.25514706
  0.90370000   2.25411221
  0.90370000   2.25496518
  0.90370000   2.25424865
  0.90370000   2.25483775
  0.90370000   2.25434146
  0.90370000   2.25474815
  0.90370000   2.25440425
  0.90370000   2.25468484
  0.90370000   2.25444639
  0.90370000   2.25463983
  0.90370000   2.25447435
  0.90370000   2.25460757
  0.90370000   2.25449262
  0.90370000   2.25458423
  0.90370000   2.25450424
  0.90370000   2.25456713
  0.90370000   2.25451136
  0.90380000   2.25343322
  0.90380000   2.25627245
  0.90380000   2.25389274
  0.90380000   2.25586953
  0.90380000   2.25421059
  0.90380000   2.25558671
  0.90380000   2.25443008
  0.90380000   2.25538786
  0.90380000   2.25458129
  0.90380000   2.25524773
  0.90380000   2.25468511
  0.90380000   2.25514865
  0.90380000   2.25475607
  0.90380000   2.25507833
  0.90380000   2.25480424
  0.90380000   2.25502814
  0.90380000   2.25483666
  0.90380000   2.25499208
  0.90380000   2.25485818
  0.90380000   2.25496595
  0.90380000   2.25487219
  0.90380000   2.25494680
  0.90380000   2.25488105
  0.90390000   2.25365859
  0.90390000   2.25677349
  0.90390000   2.25415451
  0.90390000   2.25633910
  0.90390000   2.25450023
  0.90390000   2.25603218
  0.90390000   2.25474091
  0.90390000   2.25581501
  0.90390000   2.25490813
  0.90390000   2.25566105
  0.90390000   2.25502399
  0.90390000   2.25555160
  0.90390000   2.25510394
  0.90390000   2.25547351
  0.90390000   2.25515881
  0.90390000   2.25541756
  0.90390000   2.25519620
  0.90390000   2.25537722
  0.90390000   2.25522140
  0.90390000   2.25534793
  0.90390000   2.25523813
  0.90390000   2.25532645
  0.90390000   2.25524899
  0.90400000   2.25387089
  0.90400000   2.25728447
  0.90400000   2.25440527
  0.90400000   2.25681675
  0.90400000   2.25478068
  0.90400000   2.25648408
  0.90400000   2.25504412
  0.90400000   2.25624718
  0.90400000   2.25522867
  0.90400000   2.25607819
  0.90400000   2.25535765
  0.90400000   2.25595737
  0.90400000   2.25544750
  0.90400000   2.25587073
  0.90400000   2.25550980
  0.90400000   2.25580835
  0.90400000   2.25555275
  0.90400000   2.25576322
  0.90400000   2.25558209
  0.90400000   2.25573036
  0.90400000   2.25560189
  0.90400000   2.25570624
  0.90400000   2.25561503
  0.90410000   2.25406932
  0.90410000   2.25780619
  0.90410000   2.25464425
  0.90410000   2.25730321
  0.90410000   2.25505123
  0.90410000   2.25694307
  0.90410000   2.25533906
  0.90410000   2.25668494
  0.90410000   2.25554235
  0.90410000   2.25649967
  0.90410000   2.25568563
  0.90410000   2.25636642
  0.90410000   2.25578634
  0.90410000   2.25627035
  0.90410000   2.25585687
  0.90410000   2.25620085
  0.90410000   2.25590601
  0.90410000   2.25615035
  0.90410000   2.25594000
  0.90410000   2.25611346
  0.90410000   2.25596329
  0.90410000   2.25608633
  0.90410000   2.25597903
  0.90420000   2.25425299
  0.90420000   2.25833946
  0.90420000   2.25487062
  0.90420000   2.25779927
  0.90420000   2.25531112
  0.90420000   2.25740988
  0.90420000   2.25562507
  0.90420000   2.25712896
  0.90420000   2.25584857
  0.90420000   2.25692605
  0.90420000   2.25600740
  0.90420000   2.25677925
  0.90420000   2.25612003
  0.90420000   2.25667280
  0.90420000   2.25619964
  0.90420000   2.25659539
  0.90420000   2.25625567
  0.90420000   2.25653890
  0.90420000   2.25629489
  0.90420000   2.25649748
  0.90420000   2.25632212
  0.90420000   2.25646694
  0.90420000   2.25634081
  0.90430000   2.25442099
  0.90430000   2.25888515
  0.90430000   2.25508352
  0.90430000   2.25830574
  0.90430000   2.25555955
  0.90430000   2.25788526
  0.90430000   2.25590141
  0.90430000   2.25757991
  0.90430000   2.25614668
  0.90430000   2.25735795
  0.90430000   2.25632240
  0.90430000   2.25719637
  0.90430000   2.25644806
  0.90430000   2.25707853
  0.90430000   2.25653769
  0.90430000   2.25699238
  0.90430000   2.25660138
  0.90430000   2.25692921
  0.90430000   2.25664644
  0.90430000   2.25688269
  0.90430000   2.25667811
  0.90430000   2.25684828
  0.90430000   2.25670018
  0.90440000   2.25457236
  0.90440000   2.25944418
  0.90440000   2.25528201
  0.90440000   2.25882352
  0.90440000   2.25579565
  0.90440000   2.25837005
  0.90440000   2.25616728
  0.90440000   2.25803856
  0.90440000   2.25643596
  0.90440000   2.25779603
  0.90440000   2.25662999
  0.90440000   2.25761839
  0.90440000   2.25676989
  0.90440000   2.25748807
  0.90440000   2.25687054
  0.90440000   2.25739226
  0.90440000   2.25694274
  0.90440000   2.25732164
  0.90440000   2.25699433
  0.90440000   2.25726942
  0.90440000   2.25703100
  0.90440000   2.25723063
  0.90440000   2.25705689
  0.90450000   2.25470610
  0.90450000   2.26001750
  0.90450000   2.25546511
  0.90450000   2.25935352
  0.90450000   2.25601848
  0.90450000   2.25886511
  0.90450000   2.25642182
  0.90450000   2.25850570
  0.90450000   2.25671564
  0.90450000   2.25824104
  0.90450000   2.25692949
  0.90450000   2.25804596
  0.90450000   2.25708491
  0.90450000   2.25790197
  0.90450000   2.25719767
  0.90450000   2.25779551
  0.90450000   2.25727929
  0.90450000   2.25771663
  0.90450000   2.25733817
  0.90450000   2.25765801
  0.90450000   2.25738047
  0.90450000   2.25761429
  0.90450000   2.25741068
  0.90460000   2.25482114
  0.90460000   2.26060611
  0.90460000   2.25563179
  0.90460000   2.25989673
  0.90460000   2.25622705
  0.90460000   2.25937139
  0.90460000   2.25666412
  0.90460000   2.25898222
  0.90460000   2.25698488
  0.90460000   2.25869376
  0.90460000   2.25722012
  0.90460000   2.25847978
  0.90460000   2.25739245
  0.90460000   2.25832087
  0.90460000   2.25751850
  0.90460000   2.25820270
  0.90460000   2.25761052
  0.90460000   2.25811464
  0.90460000   2.25767752
  0.90460000   2.25804887
  0.90460000   2.25772613
  0.90460000   2.25799960
  0.90460000   2.25776124
  0.90470000   2.25491639
  0.90470000   2.26121106
  0.90470000   2.25578095
  0.90470000   2.26045420
  0.90470000   2.25642032
  0.90470000   2.25988989
  0.90470000   2.25689317
  0.90470000   2.25946905
  0.90470000   2.25724276
  0.90470000   2.25915506
  0.90470000   2.25750108
  0.90470000   2.25892065
  0.90470000   2.25769177
  0.90470000   2.25874548
  0.90470000   2.25783238
  0.90470000   2.25861442
  0.90470000   2.25793588
  0.90470000   2.25851621
  0.90470000   2.25801190
  0.90470000   2.25844247
  0.90470000   2.25806758
  0.90470000   2.25838696
  0.90470000   2.25810822
  0.90480000   2.25499068
  0.90480000   2.26183345
  0.90480000   2.25591143
  0.90480000   2.26102703
  0.90480000   2.25659716
  0.90480000   2.26042168
  0.90480000   2.25710792
  0.90480000   2.25996720
  0.90480000   2.25748830
  0.90480000   2.25962588
  0.90480000   2.25777144
  0.90480000   2.25936941
  0.90480000   2.25798206
  0.90480000   2.25917654
  0.90480000   2.25813858
  0.90480000   2.25903136
  0.90480000   2.25825472
  0.90480000   2.25892193
  0.90480000   2.25834076
  0.90480000   2.25883931
  0.90480000   2.25840435
  0.90480000   2.25877680
  0.90480000   2.25845120
  0.90490000   2.25504282
  0.90490000   2.26247441
  0.90490000   2.25602202
  0.90490000   2.26161636
  0.90490000   2.25675637
  0.90490000   2.26096789
  0.90490000   2.25730722
  0.90490000   2.26047777
  0.90490000   2.25772041
  0.90490000   2.26010724
  0.90490000   2.25803024
  0.90490000   2.25982699
  0.90490000   2.25826243
  0.90490000   2.25961491
  0.90490000   2.25843630
  0.90490000   2.25945428
  0.90490000   2.25856635
  0.90490000   2.25933248
  0.90490000   2.25866347
  0.90490000   2.25923999
  0.90490000   2.25873588
  0.90490000   2.25916964
  0.90490000   2.25878972
  0.90500000   2.25507155
  0.90500000   2.26313512
  0.90500000   2.25611143
  0.90500000   2.26222342
  0.90500000   2.25689668
  0.90500000   2.26152973
  0.90500000   2.25748985
  0.90500000   2.26100191
  0.90500000   2.25793795
  0.90500000   2.26060022
  0.90500000   2.25827639
  0.90500000   2.26029443
  0.90500000   2.25853189
  0.90500000   2.26006152
  0.90500000   2.25872465
  0.90500000   2.25988401
  0.90500000   2.25886995
  0.90500000   2.25974860
  0.90500000   2.25897934
  0.90500000   2.25964517
  0.90500000   2.25906157
  0.90500000   2.25956606
  0.90500000   2.25912326
  0.90510000   2.25507555
  0.90510000   2.26381683
  0.90510000   2.25617831
  0.90510000   2.26284948
  0.90510000   2.25701675
  0.90510000   2.26210848
  0.90510000   2.25765450
  0.90510000   2.26154087
  0.90510000   2.25813967
  0.90510000   2.26110603
  0.90510000   2.25850872
  0.90510000   2.26077282
  0.90510000   2.25878936
  0.90510000   2.26051740
  0.90510000   2.25900267
  0.90510000   2.26032149
  0.90510000   2.25916467
  0.90510000   2.26017111
  0.90510000   2.25928758
  0.90510000   2.26005558
  0.90510000   2.25938073
  0.90510000   2.25996671
  0.90510000   2.25945120
  0.90520000   2.25505349
  0.90520000   2.26452080
  0.90520000   2.25622126
  0.90520000   2.26349588
  0.90520000   2.25711516
  0.90520000   2.26270549
  0.90520000   2.25779977
  0.90520000   2.26209598
  0.90520000   2.25832422
  0.90520000   2.26162594
  0.90520000   2.25872597
  0.90520000   2.26126338
  0.90520000   2.25903367
  0.90520000   2.26098365
  0.90520000   2.25926925
  0.90520000   2.26076773
  0.90520000   2.25944950
  0.90520000   2.26060097
  0.90520000   2.25958731
  0.90520000   2.26047206
  0.90520000   2.25969257
  0.90520000   2.26037232
  0.90520000   2.25977285
  0.90530000   2.25500395
  0.90530000   2.26524835
  0.90530000   2.25623880
  0.90530000   2.26416401
  0.90530000   2.25719040
  0.90530000   2.26332218
  0.90530000   2.25792417
  0.90530000   2.26266866
  0.90530000   2.25849016
  0.90530000   2.26216132
  0.90530000   2.25892677
  0.90530000   2.26176741
  0.90530000   2.25926353
  0.90530000   2.26146152
  0.90530000   2.25952322
  0.90530000   2.26122388
  0.90530000   2.25972337
  0.90530000   2.26103918
  0.90530000   2.25987755
  0.90530000   2.26089554
  0.90530000   2.25999621
  0.90530000   2.26078373
  0.90530000   2.26008743
  0.90540000   2.25492548
  0.90540000   2.26600083
  0.90540000   2.25622938
  0.90540000   2.26485533
  0.90540000   2.25724088
  0.90540000   2.26396006
  0.90540000   2.25802611
  0.90540000   2.26326042
  0.90540000   2.25863593
  0.90540000   2.26271365
  0.90540000   2.25910961
  0.90540000   2.26228634
  0.90540000   2.25947753
  0.90540000   2.26195233
  0.90540000   2.25976325
  0.90540000   2.26169118
  0.90540000   2.25998507
  0.90540000   2.26148692
  0.90540000   2.26015719
  0.90540000   2.26132707
  0.90540000   2.26029065
  0.90540000   2.26120190
  0.90540000   2.26039406
  0.90550000   2.25481658
  0.90550000   2.26677964
  0.90550000   2.25619140
  0.90550000   2.26557135
  0.90550000   2.25726494
  0.90550000   2.26462072
  0.90550000   2.25810391
  0.90550000   2.26387285
  0.90550000   2.25875988
  0.90550000   2.26328453
  0.90550000   2.25927290
  0.90550000   2.26282170
  0.90550000   2.25967413
  0.90550000   2.26245755
  0.90550000   2.25998792
  0.90550000   2.26217100
  0.90550000   2.26023325
  0.90550000   2.26194544
  0.90550000   2.26042500
  0.90550000   2.26176782
  0.90550000   2.26057478
  0.90550000   2.26162787
  0.90550000   2.26069170
  0.90560000   2.25467571
  0.90560000   2.26758620
  0.90560000   2.25612317
  0.90560000   2.26631364
  0.90560000   2.25726083
  0.90560000   2.26530580
  0.90560000   2.25815579
  0.90560000   2.26450766
  0.90560000   2.25886023
  0.90560000   2.26387563
  0.90560000   2.25941489
  0.90560000   2.26337514
  0.90560000   2.25985167
  0.90560000   2.26297879
  0.90560000   2.26019563
  0.90560000   2.26266486
  0.90560000   2.26046645
  0.90560000   2.26241617
  0.90560000   2.26067961
  0.90560000   2.26221909
  0.90560000   2.26084734
  0.90560000   2.26206284
  0.90560000   2.26097923
  0.90570000   2.25450127
  0.90570000   2.26842198
  0.90570000   2.25602296
  0.90570000   2.26708383
  0.90570000   2.25722669
  0.90570000   2.26601704
  0.90570000   2.25817984
  0.90570000   2.26516665
  0.90570000   2.25893507
  0.90570000   2.26448878
  0.90570000   2.25953371
  0.90570000   2.26394845
  0.90570000   2.26000833
  0.90570000   2.26351775
  0.90570000   2.26038465
  0.90570000   2.26317441
  0.90570000   2.26068301
  0.90570000   2.26290065
  0.90570000   2.26091951
  0.90570000   2.26268234
  0.90570000   2.26110691
  0.90570000   2.26250817
  0.90570000   2.26125536
  0.90580000   2.25429163
  0.90580000   2.26928846
  0.90580000   2.25588897
  0.90580000   2.26788358
  0.90580000   2.25716061
  0.90580000   2.26675626
  0.90580000   2.25817407
  0.90580000   2.26585169
  0.90580000   2.25898237
  0.90580000   2.26512589
  0.90580000   2.25962735
  0.90580000   2.26454356
  0.90580000   2.26014215
  0.90580000   2.26407633
  0.90580000   2.26055310
  0.90580000   2.26370145
  0.90580000   2.26088114
  0.90580000   2.26340062
  0.90580000   2.26114298
  0.90580000   2.26315918
  0.90580000   2.26135193
  0.90580000   2.26296535
  0.90580000   2.26151862
  0.90590000   2.25404513
  0.90590000   2.27018714
  0.90590000   2.25571932
  0.90590000   2.26871461
  0.90590000   2.25706057
  0.90590000   2.26752532
  0.90590000   2.25813638
  0.90590000   2.26656478
  0.90590000   2.25899999
  0.90590000   2.26578901
  0.90590000   2.25969365
  0.90590000   2.26516251
  0.90590000   2.26025100
  0.90590000   2.26465656
  0.90590000   2.26069890
  0.90590000   2.26424797
  0.90590000   2.26105887
  0.90590000   2.26391797
  0.90590000   2.26134817
  0.90590000   2.26365141
  0.90590000   2.26158063
  0.90590000   2.26343606
  0.90590000   2.26176737
  0.90600000   2.25376007
  0.90600000   2.27111956
  0.90600000   2.25551211
  0.90600000   2.26957870
  0.90600000   2.25692448
  0.90600000   2.26832618
  0.90600000   2.25806454
  0.90600000   2.26730799
  0.90600000   2.25898565
  0.90600000   2.26648030
  0.90600000   2.25973031
  0.90600000   2.26580750
  0.90600000   2.26033258
  0.90600000   2.26526063
  0.90600000   2.26081981
  0.90600000   2.26481610
  0.90600000   2.26121402
  0.90600000   2.26445476
  0.90600000   2.26153298
  0.90600000   2.26416102
  0.90600000   2.26179104
  0.90600000   2.26392220
  0.90600000   2.26199979
  0.90610000   2.25343472
  0.90610000   2.27208724
  0.90610000   2.25526533
  0.90610000   2.27047763
  0.90610000   2.25675016
  0.90610000   2.26916085
  0.90610000   2.25795624
  0.90610000   2.26808351
  0.90610000   2.25893690
  0.90610000   2.26720206
  0.90610000   2.25973484
  0.90610000   2.26648089
  0.90610000   2.26038442
  0.90610000   2.26589088
  0.90610000   2.26091338
  0.90610000   2.26540819
  0.90610000   2.26134421
  0.90610000   2.26501329
  0.90610000   2.26169514
  0.90610000   2.26469020
  0.90610000   2.26198098
  0.90610000   2.26442584
  0.90610000   2.26221379
  0.90620000   2.25306731
  0.90620000   2.27309173
  0.90620000   2.25497698
  0.90620000   2.27141323
  0.90620000   2.25653536
  0.90620000   2.27003140
  0.90620000   2.25780905
  0.90620000   2.26889360
  0.90620000   2.25885122
  0.90620000   2.26795667
  0.90620000   2.25970463
  0.90620000   2.26718515
  0.90620000   2.26040386
  0.90620000   2.26654986
  0.90620000   2.26097698
  0.90620000   2.26602676
  0.90620000   2.26144684
  0.90620000   2.26559604
  0.90620000   2.26183211
  0.90620000   2.26524137
  0.90620000   2.26214803
  0.90620000   2.26494932
  0.90620000   2.26240707
  0.90630000   2.25265609
  0.90630000   2.27413454
  0.90630000   2.25464498
  0.90630000   2.27238734
  0.90630000   2.25627774
  0.90630000   2.27093995
  0.90630000   2.25762042
  0.90630000   2.26974060
  0.90630000   2.25872590
  0.90630000   2.26874666
  0.90630000   2.25963687
  0.90630000   2.26792293
  0.90630000   2.26038805
  0.90630000   2.26724027
  0.90630000   2.26100772
  0.90630000   2.26667454
  0.90630000   2.26151908
  0.90630000   2.26620571
  0.90630000   2.26194112
  0.90630000   2.26581720
  0.90630000   2.26228949
  0.90630000   2.26549522
  0.90630000   2.26257705
  0.90640000   2.25219926
  0.90640000   2.27521720
  0.90640000   2.25426721
  0.90640000   2.27340183
  0.90640000   2.25597492
  0.90640000   2.27188867
  0.90640000   2.25738773
  0.90640000   2.27062694
  0.90640000   2.25855811
  0.90640000   2.26957466
  0.90640000   2.25952862
  0.90640000   2.26869701
  0.90640000   2.26033394
  0.90640000   2.26796500
  0.90640000   2.26100255
  0.90640000   2.26735447
  0.90640000   2.26155784
  0.90640000   2.26684526
  0.90640000   2.26201913
  0.90640000   2.26642058
  0.90640000   2.26240240
  0.90640000   2.26606638
  0.90640000   2.26272086
  0.90650000   2.25169503
  0.90650000   2.27634119
  0.90650000   2.25384155
  0.90650000   2.27445856
  0.90650000   2.25562444
  0.90650000   2.27287975
  0.90650000   2.25710823
  0.90650000   2.27155511
  0.90650000   2.25834491
  0.90650000   2.27044341
  0.90650000   2.25937672
  0.90650000   2.26951032
  0.90650000   2.26023829
  0.90650000   2.26872711
  0.90650000   2.26095812
  0.90650000   2.26806969
  0.90650000   2.26155978
  0.90650000   2.26751787
  0.90650000   2.26206282
  0.90650000   2.26705470
  0.90650000   2.26248348
  0.90650000   2.26666594
  0.90650000   2.26283530
  0.90660000   2.25114162
  0.90660000   2.27750797
  0.90660000   2.25336582
  0.90660000   2.27555936
  0.90660000   2.25522378
  0.90660000   2.27391541
  0.90660000   2.25677912
  0.90660000   2.27252765
  0.90660000   2.25808321
  0.90660000   2.27135574
  0.90660000   2.25917791
  0.90660000   2.27036593
  0.90660000   2.26009765
  0.90660000   2.26952983
  0.90660000   2.26087090
  0.90660000   2.26882357
  0.90660000   2.26152130
  0.90660000   2.26822698
  0.90660000   2.26206855
  0.90660000   2.26772303
  0.90660000   2.26252914
  0.90660000   2.26729734
  0.90660000   2.26291684
  0.90670000   2.25053727
  0.90670000   2.27871896
  0.90670000   2.25283785
  0.90670000   2.27670607
  0.90670000   2.25477039
  0.90670000   2.27499787
  0.90670000   2.25639750
  0.90670000   2.27354715
  0.90670000   2.25776982
  0.90670000   2.27231456
  0.90670000   2.25892873
  0.90670000   2.27126701
  0.90670000   2.25990837
  0.90670000   2.27037659
  0.90670000   2.26073708
  0.90670000   2.26961969
  0.90670000   2.26143849
  0.90670000   2.26897626
  0.90670000   2.26203240
  0.90670000   2.26842931
  0.90670000   2.26253543
  0.90670000   2.26796436
  0.90670000   2.26296158
  0.90680000   2.24988021
  0.90680000   2.27997549
  0.90680000   2.25225548
  0.90680000   2.27790047
  0.90680000   2.25426169
  0.90680000   2.27612933
  0.90680000   2.25596039
  0.90680000   2.27461624
  0.90680000   2.25740141
  0.90680000   2.27332285
  0.90680000   2.25862557
  0.90680000   2.27221687
  0.90680000   2.25966660
  0.90680000   2.27127095
  0.90680000   2.26055262
  0.90680000   2.27046182
  0.90680000   2.26130718
  0.90680000   2.26976968
  0.90680000   2.26195009
  0.90680000   2.26917759
  0.90680000   2.26249806
  0.90680000   2.26867109
  0.90680000   2.26296522
  0.90690000   2.24916873
  0.90690000   2.28127886
  0.90690000   2.25161654
  0.90690000   2.27914428
  0.90690000   2.25369508
  0.90690000   2.27731199
  0.90690000   2.25546479
  0.90690000   2.27573752
  0.90690000   2.25697461
  0.90690000   2.27438364
  0.90690000   2.25826468
  0.90690000   2.27321892
  0.90690000   2.25936829
  0.90690000   2.27221663
  0.90690000   2.26031325
  0.90690000   2.27135397
  0.90690000   2.26112292
  0.90690000   2.27061142
  0.90690000   2.26181703
  0.90690000   2.26997222
  0.90690000   2.26241233
  0.90690000   2.26942199
  0.90690000   2.26292305
  0.90700000   2.24840116
  0.90700000   2.28263025
  0.90700000   2.25091888
  0.90700000   2.28043916
  0.90700000   2.25306796
  0.90700000   2.27854797
  0.90700000   2.25490763
  0.90700000   2.27691361
  0.90700000   2.25648591
  0.90700000   2.27550000
  0.90700000   2.25784220
  0.90700000   2.27427662
  0.90700000   2.25900924
  0.90700000   2.27321747
  0.90700000   2.26001445
  0.90700000   2.27230029
  0.90700000   2.26088093
  0.90700000   2.27150592
  0.90700000   2.26162829
  0.90700000   2.27081786
  0.90700000   2.26227320
  0.90700000   2.27022186
  0.90700000   2.26282990
  0.90710000   2.24757588
  0.90710000   2.28403076
  0.90710000   2.25016043
  0.90710000   2.28178669
  0.90710000   2.25237774
  0.90710000   2.27983934
  0.90710000   2.25428584
  0.90710000   2.27814707
  0.90710000   2.25593177
  0.90710000   2.27667497
  0.90710000   2.25735414
  0.90710000   2.27539351
  0.90710000   2.25858506
  0.90710000   2.27427744
  0.90710000   2.25965148
  0.90710000   2.27330512
  0.90710000   2.26057620
  0.90710000   2.27245784
  0.90710000   2.26137858
  0.90710000   2.27171944
  0.90710000   2.26207517
  0.90710000   2.27107586
  0.90710000   2.26268019
  0.90720000   2.24669136
  0.90720000   2.28548136
  0.90720000   2.24933915
  0.90720000   2.28318831
  0.90720000   2.25162187
  0.90720000   2.28118807
  0.90720000   2.25359636
  0.90720000   2.27944040
  0.90720000   2.25530862
  0.90720000   2.27791160
  0.90720000   2.25679643
  0.90720000   2.27657311
  0.90720000   2.25809122
  0.90720000   2.27540056
  0.90720000   2.25921942
  0.90720000   2.27437293
  0.90720000   2.26020341
  0.90720000   2.27347206
  0.90720000   2.26106229
  0.90720000   2.27268215
  0.90720000   2.26181240
  0.90720000   2.27198946
  0.90720000   2.26246785
  0.90730000   2.24574612
  0.90730000   2.28698292
  0.90730000   2.24845307
  0.90730000   2.28464534
  0.90730000   2.25079786
  0.90730000   2.28259600
  0.90730000   2.25283614
  0.90730000   2.28079600
  0.90730000   2.25461286
  0.90730000   2.27921283
  0.90730000   2.25616493
  0.90730000   2.27781897
  0.90730000   2.25752308
  0.90730000   2.27659089
  0.90730000   2.25871314
  0.90730000   2.27550830
  0.90730000   2.25975703
  0.90730000   2.27455360
  0.90730000   2.26067349
  0.90730000   2.27371147
  0.90730000   2.26147863
  0.90730000   2.27296850
  0.90730000   2.26218635
  0.90740000   2.24473881
  0.90740000   2.28853613
  0.90740000   2.24750033
  0.90740000   2.28615898
  0.90740000   2.24990331
  0.90740000   2.28406484
  0.90740000   2.25200220
  0.90740000   2.28221614
  0.90740000   2.25384093
  0.90740000   2.28058154
  0.90740000   2.25545552
  0.90740000   2.27913453
  0.90740000   2.25687593
  0.90740000   2.27785248
  0.90740000   2.25812739
  0.90740000   2.27671583
  0.90740000   2.25923129
  0.90740000   2.27570762
  0.90740000   2.26020597
  0.90740000   2.27481303
  0.90740000   2.26106723
  0.90740000   2.27401904
  0.90740000   2.26182873
  0.90750000   2.24366817
  0.90750000   2.29014154
  0.90750000   2.24647918
  0.90750000   2.28773021
  0.90750000   2.24893590
  0.90750000   2.28559611
  0.90750000   2.25109164
  0.90750000   2.28370292
  0.90750000   2.25298930
  0.90750000   2.28202043
  0.90750000   2.25466403
  0.90750000   2.28052315
  0.90750000   2.25614501
  0.90750000   2.27918933
  0.90750000   2.25745679
  0.90750000   2.27800017
  0.90750000   2.25862025
  0.90750000   2.27693936
  0.90750000   2.25965326
  0.90750000   2.27599263
  0.90750000   2.26057123
  0.90750000   2.27514744
  0.90750000   2.26138756
  0.90760000   2.24253308
  0.90760000   2.29179953
  0.90760000   2.24538799
  0.90760000   2.28935985
  0.90760000   2.24789347
  0.90760000   2.28719112
  0.90760000   2.25010169
  0.90760000   2.28525822
  0.90760000   2.25205458
  0.90760000   2.28353203
  0.90760000   2.25378640
  0.90760000   2.28198802
  0.90760000   2.25532556
  0.90760000   2.28060529
  0.90760000   2.25669595
  0.90760000   2.27936585
  0.90760000   2.25791785
  0.90760000   2.27825404
  0.90760000   2.25900866
  0.90760000   2.27725617
  0.90760000   2.25998338
  0.90760000   2.27636018
  0.90760000   2.26085507
  0.90770000   2.24133254
  0.90770000   2.29351028
  0.90770000   2.24422532
  0.90770000   2.29104848
  0.90770000   2.24677401
  0.90770000   2.28885097
  0.90770000   2.24902974
  0.90770000   2.28688372
  0.90770000   2.25103349
  0.90770000   2.28511862
  0.90770000   2.25281866
  0.90770000   2.28353208
  0.90770000   2.25441291
  0.90770000   2.28210406
  0.90770000   2.25583945
  0.90770000   2.28081729
  0.90770000   2.25711798
  0.90770000   2.27965681
  0.90770000   2.25826537
  0.90770000   2.27860951
  0.90770000   2.25929619
  0.90770000   2.27766386
  0.90770000   2.26022312
  0.90780000   2.24006575
  0.90780000   2.29527379
  0.90780000   2.24298989
  0.90780000   2.29279647
  0.90780000   2.24557571
  0.90780000   2.29057646
  0.90780000   2.24787337
  0.90780000   2.28858075
  0.90780000   2.24992294
  0.90780000   2.28678217
  0.90780000   2.25175702
  0.90780000   2.28515801
  0.90780000   2.25340251
  0.90780000   2.28368902
  0.90780000   2.25488198
  0.90780000   2.28235866
  0.90780000   2.25621453
  0.90780000   2.28115264
  0.90780000   2.25741650
  0.90780000   2.28005843
  0.90780000   2.25850201
  0.90780000   2.27906504
  0.90780000   2.25948334
  0.90790000   2.23873203
  0.90790000   2.29708982
  0.90790000   2.24168060
  0.90790000   2.29460390
  0.90790000   2.24429698
  0.90790000   2.29236811
  0.90790000   2.24663040
  0.90790000   2.29035035
  0.90790000   2.24872011
  0.90790000   2.28852433
  0.90790000   2.25059791
  0.90790000   2.28686813
  0.90790000   2.25229004
  0.90790000   2.28536323
  0.90790000   2.25381840
  0.90790000   2.28399382
  0.90790000   2.25520152
  0.90790000   2.28274621
  0.90790000   2.25645523
  0.90790000   2.28160848
  0.90790000   2.25759317
  0.90790000   2.28057013
  0.90790000   2.25862722
  0.90800000   2.23733092
  0.90800000   2.29895792
  0.90800000   2.24029661
  0.90800000   2.29647061
  0.90800000   2.24293648
  0.90800000   2.29422612
  0.90800000   2.24529894
  0.90800000   2.29219320
  0.90800000   2.24742244
  0.90800000   2.29034631
  0.90800000   2.24933809
  0.90800000   2.28866429
  0.90800000   2.25107145
  0.90800000   2.28712931
  0.90800000   2.25264384
  0.90800000   2.28572617
  0.90800000   2.25407321
  0.90800000   2.28444179
  0.90800000   2.25537489
  0.90800000   2.28326481
  0.90800000   2.25656208
  0.90800000   2.28218522
  0.90800000   2.25764623
  0.90810000   2.23586215
  0.90810000   2.30087742
  0.90810000   2.23883728
  0.90810000   2.29839612
  0.90810000   2.24149316
  0.90810000   2.29615033
  0.90810000   2.24387740
  0.90810000   2.29410953
  0.90810000   2.24602775
  0.90810000   2.29224889
  0.90810000   2.24797466
  0.90810000   2.29054789
  0.90810000   2.24974308
  0.90810000   2.28898931
  0.90810000   2.25135377
  0.90810000   2.28755856
  0.90810000   2.25282417
  0.90810000   2.28624310
  0.90810000   2.25416913
  0.90810000   2.28503206
  0.90810000   2.25540140
  0.90810000   2.28391593
  0.90810000   2.25653203
  0.90820000   2.23432566
  0.90820000   2.30284738
  0.90820000   2.23730228
  0.90820000   2.30037966
  0.90820000   2.23996629
  0.90820000   2.29814021
  0.90820000   2.24236458
  0.90820000   2.29609917
  0.90820000   2.24453426
  0.90820000   2.29423232
  0.90820000   2.24650518
  0.90820000   2.29251972
  0.90820000   2.24830175
  0.90820000   2.29094471
  0.90820000   2.24994420
  0.90820000   2.28949321
  0.90820000   2.25144951
  0.90820000   2.28815317
  0.90820000   2.25283207
  0.90820000   2.28691419
  0.90820000   2.25410422
  0.90820000   2.28576720
  0.90820000   2.25527662
  0.90830000   2.23272161
  0.90830000   2.30486665
  0.90830000   2.23569153
  0.90830000   2.30242015
  0.90830000   2.23835547
  0.90830000   2.30019484
  0.90830000   2.24075967
  0.90830000   2.29816145
  0.90830000   2.24294065
  0.90830000   2.29629629
  0.90830000   2.24492774
  0.90830000   2.29457994
  0.90830000   2.24674483
  0.90830000   2.29299622
  0.90830000   2.24841171
  0.90830000   2.29153151
  0.90830000   2.24994491
  0.90830000   2.29017418
  0.90830000   2.25135844
  0.90830000   2.28891425
  0.90830000   2.25266424
  0.90830000   2.28774304
  0.90830000   2.25387262
  0.90840000   2.23105039
  0.90840000   2.30693381
  0.90840000   2.23400525
  0.90840000   2.30451618
  0.90840000   2.23666067
  0.90840000   2.30231289
  0.90840000   2.23906231
  0.90840000   2.30029520
  0.90840000   2.24124614
  0.90840000   2.29843990
  0.90840000   2.24324100
  0.90840000   2.29672802
  0.90840000   2.24507038
  0.90840000   2.29514379
  0.90840000   2.24675362
  0.90840000   2.29367398
  0.90840000   2.24830689
  0.90840000   2.29230734
  0.90840000   2.24974381
  0.90840000   2.29103424
  0.90840000   2.25107602
  0.90840000   2.28984636
  0.90840000   2.25231350
  0.90850000   2.22931264
  0.90850000   2.30904720
  0.90850000   2.23224398
  0.90850000   2.30666601
  0.90850000   2.23488226
  0.90850000   2.30449261
  0.90850000   2.23727260
  0.90850000   2.30249874
  0.90850000   2.23945049
  0.90850000   2.30066162
  0.90850000   2.24144433
  0.90850000   2.29896266
  0.90850000   2.24327720
  0.90850000   2.29738647
  0.90850000   2.24496810
  0.90850000   2.29592013
  0.90850000   2.24653286
  0.90850000   2.29455273
  0.90850000   2.24798479
  0.90850000   2.29327494
  0.90850000   2.24933522
  0.90850000   2.29207872
  0.90850000   2.25059385
  0.90860000   2.22750923
  0.90860000   2.31120494
  0.90860000   2.23040857
  0.90860000   2.30886757
  0.90860000   2.23302103
  0.90860000   2.30673182
  0.90860000   2.23539118
  0.90860000   2.30476985
  0.90860000   2.23755409
  0.90860000   2.30295926
  0.90860000   2.23953777
  0.90860000   2.30128179
  0.90860000   2.24136495
  0.90860000   2.29972237
  0.90860000   2.24305430
  0.90860000   2.29826839
  0.90860000   2.24462135
  0.90860000   2.29690919
  0.90860000   2.24607915
  0.90860000   2.29563571
  0.90860000   2.24743877
  0.90860000   2.29444015
  0.90860000   2.24870968
  0.90870000   2.22564130
  0.90870000   2.31340488
  0.90870000   2.22850022
  0.90870000   2.31111850
  0.90870000   2.23107815
  0.90870000   2.30902795
  0.90870000   2.23341920
  0.90870000   2.30710577
  0.90870000   2.23555799
  0.90870000   2.30532994
  0.90870000   2.23752219
  0.90870000   2.30368251
  0.90870000   2.23933420
  0.90870000   2.30214866
  0.90870000   2.24101242
  0.90870000   2.30071604
  0.90870000   2.24257210
  0.90870000   2.29937424
  0.90870000   2.24402608
  0.90870000   2.29811439
  0.90870000   2.24538519
  0.90870000   2.29692890
  0.90870000   2.24665871
  0.90880000   2.22371022
  0.90880000   2.31564467
  0.90880000   2.22652043
  0.90880000   2.31341611
  0.90880000   2.22905527
  0.90880000   2.31137798
  0.90880000   2.23135834
  0.90880000   2.30950324
  0.90880000   2.23346390
  0.90880000   2.30777017
  0.90880000   2.23539925
  0.90880000   2.30616110
  0.90880000   2.23718651
  0.90880000   2.30466148
  0.90880000   2.23884382
  0.90880000   2.30325917
  0.90880000   2.24038621
  0.90880000   2.30194396
  0.90880000   2.24182629
  0.90880000   2.30070717
  0.90880000   2.24317472
  0.90880000   2.29954140
  0.90880000   2.24444058
  0.90890000   2.22171762
  0.90890000   2.31792174
  0.90890000   2.22447107
  0.90890000   2.31575741
  0.90890000   2.22695444
  0.90890000   2.31377855
  0.90890000   2.22921087
  0.90890000   2.31195847
  0.90890000   2.23127422
  0.90890000   2.31027576
  0.90890000   2.23317147
  0.90890000   2.30871304
  0.90890000   2.23492445
  0.90890000   2.30725599
  0.90890000   2.23655108
  0.90890000   2.30589266
  0.90890000   2.23806617
  0.90890000   2.30461303
  0.90890000   2.23948214
  0.90890000   2.30340860
  0.90890000   2.24080949
  0.90890000   2.30227209
  0.90890000   2.24205714
  0.90900000   2.21966537
  0.90900000   2.32023332
  0.90900000   2.22235432
  0.90900000   2.31813917
  0.90900000   2.22477817
  0.90900000   2.31622590
  0.90900000   2.22697959
  0.90900000   2.31446718
  0.90900000   2.22899205
  0.90900000   2.31284195
  0.90900000   2.23084221
  0.90900000   2.31133305
  0.90900000   2.23255165
  0.90900000   2.30992640
  0.90900000   2.23413803
  0.90900000   2.30861025
  0.90900000   2.23561599
  0.90900000   2.30737475
  0.90900000   2.23699776
  0.90900000   2.30621153
  0.90900000   2.23829367
  0.90900000   2.30511347
  0.90900000   2.23951253
  0.90910000   2.21755558
  0.90910000   2.32257647
  0.90910000   2.22017268
  0.90910000   2.32055789
  0.90910000   2.22252936
  0.90910000   2.31871594
  0.90910000   2.22466783
  0.90910000   2.31702470
  0.90910000   2.22662116
  0.90910000   2.31546338
  0.90910000   2.22841570
  0.90910000   2.31401512
  0.90910000   2.23007275
  0.90910000   2.31266603
  0.90910000   2.23160976
  0.90910000   2.31140457
  0.90910000   2.23304115
  0.90910000   2.31022105
  0.90910000   2.23437900
  0.90910000   2.30910725
  0.90910000   2.23563350
  0.90910000   2.30805616
  0.90910000   2.23681330
  0.90920000   2.21539058
  0.90920000   2.32494809
  0.90920000   2.21792895
  0.90920000   2.32300985
  0.90920000   2.22021134
  0.90920000   2.32124431
  0.90920000   2.22227946
  0.90920000   2.31962593
  0.90920000   2.22416599
  0.90920000   2.31813423
  0.90920000   2.22589696
  0.90920000   2.31675262
  0.90920000   2.22749340
  0.90920000   2.31546742
  0.90920000   2.22897253
  0.90920000   2.31426729
  0.90920000   2.23034858
  0.90920000   2.31314270
  0.90920000   2.23163347
  0.90920000   2.31208558
  0.90920000   2.23283722
  0.90920000   2.31108905
  0.90920000   2.23396838
  0.90930000   2.21317291
  0.90930000   2.32734496
  0.90930000   2.21562624
  0.90930000   2.32549117
  0.90930000   2.21782780
  0.90930000   2.32380639
  0.90930000   2.21981882
  0.90930000   2.32226546
  0.90930000   2.22163158
  0.90930000   2.32084824
  0.90930000   2.22329178
  0.90930000   2.31953836
  0.90930000   2.22482018
  0.90930000   2.31832241
  0.90930000   2.22623377
  0.90930000   2.31718923
  0.90930000   2.22754659
  0.90930000   2.31612944
  0.90930000   2.22877036
  0.90930000   2.31513513
  0.90930000   2.22991500
  0.90930000   2.31419954
  0.90930000   2.23098890
  0.90940000   2.21090535
  0.90940000   2.32976374
  0.90940000   2.21326790
  0.90940000   2.32799780
  0.90940000   2.21538278
  0.90940000   2.32639736
  0.90940000   2.21729069
  0.90940000   2.32493763
  0.90940000   2.21902352
  0.90940000   2.32359879
  0.90940000   2.22060664
  0.90940000   2.32236477
  0.90940000   2.22206052
  0.90940000   2.32122234
  0.90940000   2.22340191
  0.90940000   2.32016056
  0.90940000   2.22464467
  0.90940000   2.31917021
  0.90940000   2.22580036
  0.90940000   2.31824353
  0.90940000   2.22687871
  0.90940000   2.31737387
  0.90940000   2.22788802
  0.90950000   2.20859079
  0.90950000   2.33220102
  0.90950000   2.21085754
  0.90950000   2.33052560
  0.90950000   2.21288063
  0.90950000   2.32901225
  0.90950000   2.21470026
  0.90950000   2.32763658
  0.90950000   2.21634792
  0.90950000   2.32637908
  0.90950000   2.21784861
  0.90950000   2.32522394
  0.90950000   2.21922256
  0.90950000   2.32415817
  0.90950000   2.22048627
  0.90950000   2.32317100
  0.90950000   2.22165339
  0.90950000   2.32225340
  0.90950000   2.22273532
  0.90950000   2.32139774
  0.90950000   2.22374167
  0.90950000   2.32059751
  0.90950000   2.22468056
  0.90960000   2.20623235
  0.90960000   2.33465333
  0.90960000   2.20839896
  0.90960000   2.33307035
  0.90960000   2.21032597
  0.90960000   2.33164603
  0.90960000   2.21205304
  0.90960000   2.33035635
  0.90960000   2.21361124
  0.90960000   2.32918213
  0.90960000   2.21502526
  0.90960000   2.32810782
  0.90960000   2.21631503
  0.90960000   2.32712065
  0.90960000   2.21749683
  0.90960000   2.32621004
  0.90960000   2.21858411
  0.90960000   2.32536713
  0.90960000   2.21958810
  0.90960000   2.32458442
  0.90960000   2.22051825
  0.90960000   2.32385553
  0.90960000   2.22138259
  0.90970000   2.20383324
  0.90970000   2.33711719
  0.90970000   2.20589616
  0.90970000   2.33562783
  0.90970000   2.20772363
  0.90970000   2.33429363
  0.90970000   2.20935480
  0.90970000   2.33309096
  0.90970000   2.21082031
  0.90970000   2.33200096
  0.90970000   2.21214453
  0.90970000   2.33100834
  0.90970000   2.21334710
  0.90970000   2.33010054
  0.90970000   2.21444409
  0.90970000   2.32926717
  0.90970000   2.21544874
  0.90970000   2.32849952
  0.90970000   2.21637212
  0.90970000   2.32779024
  0.90970000   2.21722355
  0.90970000   2.32713306
  0.90970000   2.21801093
  0.90980000   2.20139681
  0.90980000   2.33958913
  0.90980000   2.20335327
  0.90980000   2.33819381
  0.90980000   2.20507862
  0.90980000   2.33695000
  0.90980000   2.20661151
  0.90980000   2.33583448
  0.90980000   2.20798217
  0.90980000   2.33482866
  0.90980000   2.20921461
  0.90980000   2.33391752
  0.90980000   2.21032821
  0.90980000   2.33308874
  0.90980000   2.21133882
  0.90980000   2.33233207
  0.90980000   2.21225950
  0.90980000   2.33163898
  0.90980000   2.21310116
  0.90980000   2.33100224
  0.90980000   2.21387296
  0.90980000   2.33041570
  0.90980000   2.21458269
  0.90990000   2.19892650
  0.90990000   2.34206571
  0.90990000   2.20077451
  0.90990000   2.34076413
  0.90990000   2.20239606
  0.90990000   2.33961022
  0.90990000   2.20382927
  0.90990000   2.33858109
  0.90990000   2.20510394
  0.90990000   2.33765851
  0.90990000   2.20624378
  0.90990000   2.33682767
  0.90990000   2.20726789
  0.90990000   2.33607647
  0.90990000   2.20819188
  0.90990000   2.33539487
  0.90990000   2.20902864
  0.90990000   2.33477445
  0.90990000   2.20978891
  0.90990000   2.33420812
  0.90990000   2.21048173
  0.90990000   2.33368986
  0.90990000   2.21111477
  0.91000000   2.19642579
  0.91000000   2.34454356
  0.91000000   2.19816418
  0.91000000   2.34333475
  0.91000000   2.19968113
  0.91000000   2.34226946
  0.91000000   2.20101421
  0.91000000   2.34132520
  0.91000000   2.20219283
  0.91000000   2.34048403
  0.91000000   2.20324033
  0.91000000   2.33973141
  0.91000000   2.20417558
  0.91000000   2.33905544
  0.91000000   2.20501395
  0.91000000   2.33844625
  0.91000000   2.20576814
  0.91000000   2.33789560
  0.91000000   2.20644873
  0.91000000   2.33739651
  0.91000000   2.20706464
  0.91000000   2.33694308
  0.91000000   2.20762339
  0.91010000   2.19389823
  0.91010000   2.34701940
  0.91010000   2.19552662
  0.91010000   2.34590173
  0.91010000   2.19693901
  0.91010000   2.34492311
  0.91010000   2.19817245
  0.91010000   2.34406146
  0.91010000   2.19925590
  0.91010000   2.34329913
  0.91010000   2.20021241
  0.91010000   2.34262185
  0.91010000   2.20106052
  0.91010000   2.34201793
  0.91010000   2.20181540
  0.91010000   2.34147769
  0.91010000   2.20248954
  0.91010000   2.34099304
  0.91010000   2.20309336
  0.91010000   2.34055716
  0.91010000   2.20363562
  0.91010000   2.34016427
  0.91010000   2.20412372
  0.91020000   2.19134735
  0.91020000   2.34949008
  0.91020000   2.19286612
  0.91020000   2.34846131
  0.91020000   2.19417483
  0.91020000   2.34756680
  0.91020000   2.19530999
  0.91020000   2.34678485
  0.91020000   2.19630011
  0.91020000   2.34609812
  0.91020000   2.19716788
  0.91020000   2.34549263
  0.91020000   2.19793156
  0.91020000   2.34495691
  0.91020000   2.19860607
  0.91020000   2.34448148
  0.91020000   2.19920368
  0.91020000   2.34405843
  0.91020000   2.19973463
  0.91020000   2.34368110
  0.91020000   2.20020750
  0.91020000   2.34334385
  0.91020000   2.20062955
  0.91030000   2.18877668
  0.91030000   2.35195256
  0.91030000   2.19018695
  0.91030000   2.35100995
  0.91030000   2.19139365
  0.91030000   2.35019643
  0.91030000   2.19243268
  0.91030000   2.34949071
  0.91030000   2.19333212
  0.91030000   2.34887581
  0.91030000   2.19411426
  0.91030000   2.34833802
  0.91030000   2.19479706
  0.91030000   2.34786613
  0.91030000   2.19539515
  0.91030000   2.34745088
  0.91030000   2.19592057
  0.91030000   2.34708456
  0.91030000   2.19638333
  0.91030000   2.34676070
  0.91030000   2.19679182
  0.91030000   2.34647382
  0.91030000   2.19715311
  0.91040000   2.18618972
  0.91040000   2.35440397
  0.91040000   2.18749330
  0.91040000   2.35354430
  0.91040000   2.18860035
  0.91040000   2.35280820
  0.91040000   2.18954615
  0.91040000   2.35217480
  0.91040000   2.19035828
  0.91040000   2.35162750
  0.91040000   2.19105863
  0.91040000   2.35115292
  0.91040000   2.19166478
  0.91040000   2.35074012
  0.91040000   2.19219107
  0.91040000   2.35038011
  0.91040000   2.19264924
  0.91040000   2.35006539
  0.91040000   2.19304905
  0.91040000   2.34978971
  0.91040000   2.19339866
  0.91040000   2.34954778
  0.91040000   2.19370491
  0.91050000   2.18358987
  0.91050000   2.35684163
  0.91050000   2.18478922
  0.91050000   2.35606128
  0.91050000   2.18579963
  0.91050000   2.35539863
  0.91050000   2.18665574
  0.91050000   2.35483329
  0.91050000   2.18738456
  0.91050000   2.35434907
  0.91050000   2.18800752
  0.91050000   2.35393293
  0.91050000   2.18854181
  0.91050000   2.35357427
  0.91050000   2.18900138
  0.91050000   2.35326438
  0.91050000   2.18939767
  0.91050000   2.35299602
  0.91050000   2.18974012
  0.91050000   2.35276320
  0.91050000   2.19003662
  0.91050000   2.35256085
  0.91050000   2.19029373
  0.91060000   2.18098049
  0.91060000   2.35926302
  0.91060000   2.18207863
  0.91060000   2.35855806
  0.91060000   2.18299599
  0.91060000   2.35796460
  0.91060000   2.18376647
  0.91060000   2.35746279
  0.91060000   2.18441647
  0.91060000   2.35703692
  0.91060000   2.18496690
  0.91060000   2.35667432
  0.91060000   2.18543448
  0.91060000   2.35636476
  0.91060000   2.18583275
  0.91060000   2.35609985
  0.91060000   2.18617276
  0.91060000   2.35587268
  0.91060000   2.18646360
  0.91060000   2.35567751
  0.91060000   2.18671280
  0.91060000   2.35550956
  0.91060000   2.18692665
  0.91070000   2.17836479
  0.91070000   2.36166584
  0.91070000   2.17936527
  0.91070000   2.36103206
  0.91070000   2.18019365
  0.91070000   2.36050333
  0.91070000   2.18088300
  0.91070000   2.36006039
  0.91070000   2.18145907
  0.91070000   2.35968802
  0.91070000   2.18194214
  0.91070000   2.35937401
  0.91070000   2.18234841
  0.91070000   2.35910854
  0.91070000   2.18269094
  0.91070000   2.35888359
  0.91070000   2.18298033
  0.91070000   2.35869260
  0.91070000   2.18322526
  0.91070000   2.35853013
  0.91070000   2.18343290
  0.91070000   2.35839172
  0.91070000   2.18360915
  0.91080000   2.17574588
  0.91080000   2.36404799
  0.91080000   2.17665268
  0.91080000   2.36348101
  0.91080000   2.17739654
  0.91080000   2.36301242
  0.91080000   2.17800963
  0.91080000   2.36262360
  0.91080000   2.17851690
  0.91080000   2.36229988
  0.91080000   2.17893797
  0.91080000   2.36202959
  0.91080000   2.17928843
  0.91080000   2.36180334
  0.91080000   2.17958079
  0.91080000   2.36161353
  0.91080000   2.17982514
  0.91080000   2.36145397
  0.91080000   2.18002972
  0.91080000   2.36131959
  0.91080000   2.18020123
  0.91080000   2.36120622
  0.91080000   2.18034522
  0.91090000   2.17312671
  0.91090000   2.36640758
  0.91090000   2.17394420
  0.91090000   2.36590290
  0.91090000   2.17460832
  0.91090000   2.36548980
  0.91090000   2.17515022
  0.91090000   2.36515036
  0.91090000   2.17559399
  0.91090000   2.36487055
  0.91090000   2.17595849
  0.91090000   2.36463924
  0.91090000   2.17625862
  0.91090000   2.36444755
  0.91090000   2.17650626
  0.91090000   2.36428833
  0.91090000   2.17671097
  0.91090000   2.36415581
  0.91090000   2.17688045
  0.91090000   2.36404528
  0.91090000   2.17702095
  0.91090000   2.36395294
  0.91090000   2.17713757
  0.91100000   2.17051009
  0.91100000   2.36874292
  0.91100000   2.17124293
  0.91100000   2.36829599
  0.91100000   2.17183231
  0.91100000   2.36793374
  0.91100000   2.17230825
  0.91100000   2.36763904
  0.91100000   2.17269387
  0.91100000   2.36739852
  0.91100000   2.17300718
  0.91100000   2.36720168
  0.91100000   2.17326233
  0.91100000   2.36704017
  0.91100000   2.17347052
  0.91100000   2.36690734
  0.91100000   2.17364067
  0.91100000   2.36679784
  0.91100000   2.17377995
  0.91100000   2.36670738
  0.91100000   2.17389411
  0.91100000   2.36663247
  0.91100000   2.17398779
  0.91110000   2.16789863
  0.91110000   2.37105254
  0.91110000   2.16855173
  0.91110000   2.37065882
  0.91110000   2.16907151
  0.91110000   2.37034286
  0.91110000   2.16948677
  0.91110000   2.37008839
  0.91110000   2.16981957
  0.91110000   2.36988277
  0.91110000   2.17008696
  0.91110000   2.36971615
  0.91110000   2.17030226
  0.91110000   2.36958077
  0.91110000   2.17047594
  0.91110000   2.36947047
  0.91110000   2.17061628
  0.91110000   2.36938039
  0.91110000   2.17072984
  0.91110000   2.36930662
  0.91110000   2.17082186
  0.91110000   2.36924604
  0.91110000   2.17089652
  0.91120000   2.16529481
  0.91120000   2.37333519
  0.91120000   2.16587320
  0.91120000   2.37299020
  0.91120000   2.16632860
  0.91120000   2.37271609
  0.91120000   2.16668845
  0.91120000   2.37249752
  0.91120000   2.16697362
  0.91120000   2.37232265
  0.91120000   2.16720014
  0.91120000   2.37218231
  0.91120000   2.16738045
  0.91120000   2.37206935
  0.91120000   2.16752425
  0.91120000   2.37197815
  0.91120000   2.16763910
  0.91120000   2.37190429
  0.91120000   2.16773098
  0.91120000   2.37184428
  0.91120000   2.16780458
  0.91120000   2.37179536
  0.91120000   2.16786363
  0.91130000   2.16270089
  0.91130000   2.37558979
  0.91130000   2.16320971
  0.91130000   2.37528914
  0.91130000   2.16360595
  0.91130000   2.37505264
  0.91130000   2.16391554
  0.91130000   2.37486589
  0.91130000   2.16415809
  0.91130000   2.37471791
  0.91130000   2.16434855
  0.91130000   2.37460024
  0.91130000   2.16449841
  0.91130000   2.37450636
  0.91130000   2.16461654
  0.91130000   2.37443118
  0.91130000   2.16470981
  0.91130000   2.37437075
  0.91130000   2.16478358
  0.91130000   2.37432197
  0.91130000   2.16484202
  0.91130000   2.37428243
  0.91130000   2.16488840
  0.91140000   2.16011895
  0.91140000   2.37781548
  0.91140000   2.16056338
  0.91140000   2.37755495
  0.91140000   2.16090560
  0.91140000   2.37735199
  0.91140000   2.16116994
  0.91140000   2.37719324
  0.91140000   2.16137465
  0.91140000   2.37706859
  0.91140000   2.16153354
  0.91140000   2.37697032
  0.91140000   2.16165712
  0.91140000   2.37689253
  0.91140000   2.16175341
  0.91140000   2.37683067
  0.91140000   2.16182858
  0.91140000   2.37678126
  0.91140000   2.16188737
  0.91140000   2.37674158
  0.91140000   2.16193344
  0.91140000   2.37670952
  0.91140000   2.16196962
  0.91150000   2.15755089
  0.91150000   2.38001157
  0.91150000   2.15793607
  0.91150000   2.37978710
  0.91150000   2.15822929
  0.91150000   2.37961387
  0.91150000   2.15845318
  0.91150000   2.37947958
  0.91150000   2.15862455
  0.91150000   2.37937501
  0.91150000   2.15875602
  0.91150000   2.37929321
  0.91150000   2.15885710
  0.91150000   2.37922888
  0.91150000   2.15893497
  0.91150000   2.37917802
  0.91150000   2.15899510
  0.91150000   2.37913757
  0.91150000   2.15904161
  0.91150000   2.37910517
  0.91150000   2.15907770
  0.91150000   2.37907904
  0.91150000   2.15910576
  0.91160000   2.15499842
  0.91160000   2.38217756
  0.91160000   2.15532940
  0.91160000   2.38198530
  0.91160000   2.15557848
  0.91160000   2.38183822
  0.91160000   2.15576645
  0.91160000   2.38172514
  0.91160000   2.15590868
  0.91160000   2.38163774
  0.91160000   2.15601654
  0.91160000   2.38156979
  0.91160000   2.15609854
  0.91160000   2.38151664
  0.91160000   2.15616101
  0.91160000   2.38147477
  0.91160000   2.15620874
  0.91160000   2.38144153
  0.91160000   2.15624529
  0.91160000   2.38141493
  0.91160000   2.15627338
  0.91160000   2.38139344
  0.91160000   2.15629504
  0.91170000   2.15246305
  0.91170000   2.38431308
  0.91170000   2.15274477
  0.91170000   2.38414940
  0.91170000   2.15295434
  0.91170000   2.38402519
  0.91170000   2.15311068
  0.91170000   2.38393037
  0.91170000   2.15322762
  0.91170000   2.38385751
  0.91170000   2.15331532
  0.91170000   2.38380114
  0.91170000   2.15338126
  0.91170000   2.38375717
  0.91170000   2.15343097
  0.91170000   2.38372259
  0.91170000   2.15346858
  0.91170000   2.38369513
  0.91170000   2.15349712
  0.91170000   2.38367309
  0.91170000   2.15351887
  0.91170000   2.38365521
  0.91170000   2.15353551
  0.91180000   2.14994613
  0.91180000   2.38641794
  0.91180000   2.15018335
  0.91180000   2.38627946
  0.91180000   2.15035781
  0.91180000   2.38617509
  0.91180000   2.15048649
  0.91180000   2.38609586
  0.91180000   2.15058167
  0.91180000   2.38603523
  0.91180000   2.15065228
  0.91180000   2.38598844
  0.91180000   2.15070483
  0.91180000   2.38595198
  0.91180000   2.15074407
  0.91180000   2.38592325
  0.91180000   2.15077349
  0.91180000   2.38590037
  0.91180000   2.15079564
  0.91180000   2.38588190
  0.91180000   2.15081241
  0.91180000   2.38586680
  0.91180000   2.15082517
  0.91190000   2.14744882
  0.91190000   2.38849206
  0.91190000   2.14764610
  0.91190000   2.38837565
  0.91190000   2.14778958
  0.91190000   2.38828837
  0.91190000   2.14789426
  0.91190000   2.38822234
  0.91190000   2.14797088
  0.91190000   2.38817192
  0.91190000   2.14802714
  0.91190000   2.38813300
  0.91190000   2.14806863
  0.91190000   2.38810260
  0.91190000   2.14809934
  0.91190000   2.38807855
  0.91190000   2.14812219
  0.91190000   2.38805925
  0.91190000   2.14813930
  0.91190000   2.38804355
  0.91190000   2.14815219
  0.91190000   2.38803058
  0.91190000   2.14816197
  0.91200000   2.14497210
  0.91200000   2.39053552
  0.91200000   2.14513380
  0.91200000   2.39043829
  0.91200000   2.14525015
  0.91200000   2.39036560
  0.91200000   2.14533417
  0.91200000   2.39031068
  0.91200000   2.14539507
  0.91200000   2.39026870
  0.91200000   2.14543940
  0.91200000   2.39023618
  0.91200000   2.14547182
  0.91200000   2.39021064
  0.91200000   2.14549566
  0.91200000   2.39019028
  0.91200000   2.14551331
  0.91200000   2.39017378
  0.91200000   2.14552647
  0.91200000   2.39016020
  0.91200000   2.14553636
  0.91200000   2.39014885
  0.91200000   2.14554387
  0.91210000   2.14251683
  0.91210000   2.39254846
  0.91210000   2.14264703
  0.91210000   2.39246778
  0.91210000   2.14273981
  0.91210000   2.39240747
  0.91210000   2.14280620
  0.91210000   2.39236180
  0.91210000   2.14285392
  0.91210000   2.39232673
  0.91210000   2.14288840
  0.91210000   2.39229939
  0.91210000   2.14291347
  0.91210000   2.39227771
  0.91210000   2.14293183
  0.91210000   2.39226023
  0.91210000   2.14294538
  0.91210000   2.39224589
  0.91210000   2.14295547
  0.91210000   2.39223394
  0.91210000   2.14296308
  0.91210000   2.39222381
  0.91210000   2.14296887
  0.91220000   2.14008367
  0.91220000   2.39453116
  0.91220000   2.14018620
  0.91220000   2.39446464
  0.91220000   2.14025867
  0.91220000   2.39441473
  0.91220000   2.14031015
  0.91220000   2.39437671
  0.91220000   2.14034692
  0.91220000   2.39434725
  0.91220000   2.14037337
  0.91220000   2.39432403
  0.91220000   2.14039254
  0.91220000   2.39430539
  0.91220000   2.14040656
  0.91220000   2.39429015
  0.91220000   2.14041692
  0.91220000   2.39427748
  0.91220000   2.14042467
  0.91220000   2.39426675
  0.91220000   2.14043053
  0.91220000   2.39425754
  0.91220000   2.14043504
  0.91230000   2.13767317
  0.91230000   2.39648398
  0.91230000   2.13775160
  0.91230000   2.39642947
  0.91230000   2.13780672
  0.91230000   2.39638821
  0.91230000   2.13784571
  0.91230000   2.39635643
  0.91230000   2.13787348
  0.91230000   2.39633149
  0.91230000   2.13789344
  0.91230000   2.39631154
  0.91230000   2.13790793
  0.91230000   2.39629526
  0.91230000   2.13791856
  0.91230000   2.39628175
  0.91230000   2.13792646
  0.91230000   2.39627033
  0.91230000   2.13793242
  0.91230000   2.39626053
  0.91230000   2.13793697
  0.91230000   2.39625200
  0.91230000   2.13794052
  0.91240000   2.13528574
  0.91240000   2.39840732
  0.91240000   2.13534334
  0.91240000   2.39836291
  0.91240000   2.13538380
  0.91240000   2.39832879
  0.91240000   2.13541243
  0.91240000   2.39830206
  0.91240000   2.13543289
  0.91240000   2.39828070
  0.91240000   2.13544767
  0.91240000   2.39826330
  0.91240000   2.13545848
  0.91240000   2.39824886
  0.91240000   2.13546649
  0.91240000   2.39823665
  0.91240000   2.13547252
  0.91240000   2.39822619
  0.91240000   2.13547713
  0.91240000   2.39821708
  0.91240000   2.13548071
  0.91240000   2.39820905
  0.91240000   2.13548355
  0.91250000   2.13292167
  0.91250000   2.40030168
  0.91250000   2.13296145
  0.91250000   2.40026567
  0.91250000   2.13298963
  0.91250000   2.40023736
  0.91250000   2.13300979
  0.91250000   2.40021467
  0.91250000   2.13302438
  0.91250000   2.40019613
  0.91250000   2.13303508
  0.91250000   2.40018070
  0.91250000   2.13304303
  0.91250000   2.40016765
  0.91250000   2.13304904
  0.91250000   2.40015644
  0.91250000   2.13305366
  0.91250000   2.40014668
  0.91250000   2.13305726
  0.91250000   2.40013809
  0.91250000   2.13306012
  0.91250000   2.40013045
  0.91250000   2.13306243
  0.91260000   2.13058112
  0.91260000   2.40216761
  0.91260000   2.13060583
  0.91260000   2.40213849
  0.91260000   2.13062386
  0.91260000   2.40211486
  0.91260000   2.13063717
  0.91260000   2.40209535
  0.91260000   2.13064711
  0.91260000   2.40207899
  0.91260000   2.13065464
  0.91260000   2.40206507
  0.91260000   2.13066042
  0.91260000   2.40205307
  0.91260000   2.13066492
  0.91260000   2.40204259
  0.91260000   2.13066848
  0.91260000   2.40203337
  0.91260000   2.13067134
  0.91260000   2.40202516
  0.91260000   2.13067367
  0.91260000   2.40201780
  0.91260000   2.13067559
  0.91270000   2.12826418
  0.91270000   2.40400567
  0.91270000   2.12827628
  0.91270000   2.40398214
  0.91270000   2.12828605
  0.91270000   2.40396221
  0.91270000   2.12829390
  0.91270000   2.40394518
  0.91270000   2.12830022
  0.91270000   2.40393048
  0.91270000   2.12830533
  0.91270000   2.40391769
  0.91270000   2.12830947
  0.91270000   2.40390647
  0.91270000   2.12831286
  0.91270000   2.40389655
  0.91270000   2.12831565
  0.91270000   2.40388772
  0.91270000   2.12831796
  0.91270000   2.40387980
  0.91270000   2.12831990
  0.91270000   2.40387266
  0.91270000   2.12832153
  0.91280000   2.12597084
  0.91280000   2.40581649
  0.91280000   2.12597253
  0.91280000   2.40579742
  0.91280000   2.12597567
  0.91280000   2.40578038
  0.91280000   2.12597927
  0.91280000   2.40576522
  0.91280000   2.12598283
  0.91280000   2.40575177
  0.91280000   2.12598613
  0.91280000   2.40573982
  0.91280000   2.12598906
  0.91280000   2.40572918
  0.91280000   2.12599164
  0.91280000   2.40571966
  0.91280000   2.12599386
  0.91280000   2.40571112
  0.91280000   2.12599578
  0.91280000   2.40570342
  0.91280000   2.12599743
  0.91280000   2.40569644
  0.91280000   2.12599884
  0.91290000   2.12370098
  0.91290000   2.40760070
  0.91290000   2.12369425
  0.91290000   2.40758513
  0.91290000   2.12369219
  0.91290000   2.40757027
  0.91290000   2.12369253
  0.91290000   2.40755652
  0.91290000   2.12369404
  0.91290000   2.40754398
  0.91290000   2.12369601
  0.91290000   2.40753265
  0.91290000   2.12369808
  0.91290000   2.40752242
  0.91290000   2.12370007
  0.91290000   2.40751320
  0.91290000   2.12370189
  0.91290000   2.40750487
  0.91290000   2.12370352
  0.91290000   2.40749734
  0.91290000   2.12370495
  0.91290000   2.40749049
  0.91290000   2.12370621
  0.91300000   2.12145446
  0.91300000   2.40935897
  0.91300000   2.12144104
  0.91300000   2.40934606
  0.91300000   2.12143498
  0.91300000   2.40933283
  0.91300000   2.12143293
  0.91300000   2.40932009
  0.91300000   2.12143295
  0.91300000   2.40930820
  0.91300000   2.12143399
  0.91300000   2.40929730
  0.91300000   2.12143545
  0.91300000   2.40928737
  0.91300000   2.12143703
  0.91300000   2.40927837
  0.91300000   2.12143856
  0.91300000   2.40927021
  0.91300000   2.12143998
  0.91300000   2.40926280
  0.91300000   2.12144125
  0.91300000   2.40925605
  0.91300000   2.12144238
  0.91310000   2.11923103
  0.91310000   2.41109197
  0.91310000   2.11921245
  0.91310000   2.41108101
  0.91310000   2.11920344
  0.91310000   2.41106894
  0.91310000   2.11919967
  0.91310000   2.41105691
  0.91310000   2.11919867
  0.91310000   2.41104548
  0.91310000   2.11919908
  0.91310000   2.41103487
  0.91310000   2.11920013
  0.91310000   2.41102516
  0.91310000   2.11920143
  0.91310000   2.41101631
  0.91310000   2.11920276
  0.91310000   2.41100828
  0.91310000   2.11920402
  0.91310000   2.41100096
  0.91310000   2.11920518
  0.91310000   2.41099431
  0.91310000   2.11920620
  0.91320000   2.11703043
  0.91320000   2.41280037
  0.91320000   2.11700799
  0.91320000   2.41279080
  0.91320000   2.11699691
  0.91320000   2.41277951
  0.91320000   2.11699199
  0.91320000   2.41276794
  0.91320000   2.11699033
  0.91320000   2.41275679
  0.91320000   2.11699034
  0.91320000   2.41274639
  0.91320000   2.11699113
  0.91320000   2.41273683
  0.91320000   2.11699224
  0.91320000   2.41272810
  0.91320000   2.11699343
  0.91320000   2.41272016
  0.91320000   2.11699458
  0.91320000   2.41271294
  0.91320000   2.11699563
  0.91320000   2.41270635
  0.91320000   2.11699658
  0.91330000   2.11485231
  0.91330000   2.41448485
  0.91330000   2.11482716
  0.91330000   2.41447618
  0.91330000   2.11481472
  0.91330000   2.41446537
  0.91330000   2.11480911
  0.91330000   2.41445408
  0.91330000   2.11480707
  0.91330000   2.41444311
  0.91330000   2.11480686
  0.91330000   2.41443284
  0.91330000   2.11480750
  0.91330000   2.41442338
  0.91330000   2.11480849
  0.91330000   2.41441475
  0.91330000   2.11480958
  0.91330000   2.41440688
  0.91330000   2.11481064
  0.91330000   2.41439973
  0.91330000   2.11481162
  0.91330000   2.41439321
  0.91330000   2.11481249
  0.91340000   2.11269632
  0.91340000   2.41614610
  0.91340000   2.11266941
  0.91340000   2.41613794
  0.91340000   2.11265621
  0.91340000   2.41612737
  0.91340000   2.11265026
  0.91340000   2.41611622
  0.91340000   2.11264807
  0.91340000   2.41610534
  0.91340000   2.11264776
  0.91340000   2.41609515
  0.91340000   2.11264832
  0.91340000   2.41608577
  0.91340000   2.11264924
  0.91340000   2.41607720
  0.91340000   2.11265026
  0.91340000   2.41606941
  0.91340000   2.11265124
  0.91340000   2.41606232
  0.91340000   2.11265215
  0.91340000   2.41605585
  0.91340000   2.11265296
  0.91350000   2.11056206
  0.91350000   2.41778477
  0.91350000   2.11053420
  0.91350000   2.41777681
  0.91350000   2.11052071
  0.91350000   2.41776631
  0.91350000   2.11051471
  0.91350000   2.41775519
  0.91350000   2.11051252
  0.91350000   2.41774435
  0.91350000   2.11051220
  0.91350000   2.41773420
  0.91350000   2.11051273
  0.91350000   2.41772487
  0.91350000   2.11051361
  0.91350000   2.41771636
  0.91350000   2.11051457
  0.91350000   2.41770863
  0.91350000   2.11051550
  0.91350000   2.41770160
  0.91350000   2.11051635
  0.91350000   2.41769519
  0.91350000   2.11051709
  0.91360000   2.10844910
  0.91360000   2.41940153
  0.91360000   2.10842095
  0.91360000   2.41939353
  0.91360000   2.10840757
  0.91360000   2.41938296
  0.91360000   2.10840172
  0.91360000   2.41937179
  0.91360000   2.10839964
  0.91360000   2.41936095
  0.91360000   2.10839937
  0.91360000   2.41935083
  0.91360000   2.10839991
  0.91360000   2.41934154
  0.91360000   2.10840076
  0.91360000   2.41933309
  0.91360000   2.10840168
  0.91360000   2.41932541
  0.91360000   2.10840256
  0.91360000   2.41931843
  0.91360000   2.10840335
  0.91360000   2.41931207
  0.91360000   2.10840404
  0.91370000   2.10635700
  0.91370000   2.42099702
  0.91370000   2.10632912
  0.91370000   2.42098880
  0.91370000   2.10631613
  0.91370000   2.42097806
  0.91370000   2.10631058
  0.91370000   2.42096680
  0.91370000   2.10630869
  0.91370000   2.42095594
  0.91370000   2.10630851
  0.91370000   2.42094582
  0.91370000   2.10630907
  0.91370000   2.42093657
  0.91370000   2.10630991
  0.91370000   2.42092816
  0.91370000   2.10631079
  0.91370000   2.42092054
  0.91370000   2.10631161
  0.91370000   2.42091361
  0.91370000   2.10631235
  0.91370000   2.42090730
  0.91370000   2.10631299
  0.91380000   2.10428530
  0.91380000   2.42257189
  0.91380000   2.10425813
  0.91380000   2.42256330
  0.91380000   2.10424574
  0.91380000   2.42255233
  0.91380000   2.10424061
  0.91380000   2.42254095
  0.91380000   2.10423895
  0.91380000   2.42253004
  0.91380000   2.10423888
  0.91380000   2.42251994
  0.91380000   2.10423948
  0.91380000   2.42251072
  0.91380000   2.10424030
  0.91380000   2.42250235
  0.91380000   2.10424114
  0.91380000   2.42249478
  0.91380000   2.10424192
  0.91380000   2.42248790
  0.91380000   2.10424261
  0.91380000   2.42248164
  0.91380000   2.10424320
  0.91390000   2.10223355
  0.91390000   2.42412673
  0.91390000   2.10220742
  0.91390000   2.42411768
  0.91390000   2.10219579
  0.91390000   2.42410644
  0.91390000   2.10219113
  0.91390000   2.42409493
  0.91390000   2.10218973
  0.91390000   2.42408398
  0.91390000   2.10218978
  0.91390000   2.42407388
  0.91390000   2.10219041
  0.91390000   2.42406469
  0.91390000   2.10219122
  0.91390000   2.42405637
  0.91390000   2.10219202
  0.91390000   2.42404884
  0.91390000   2.10219275
  0.91390000   2.42404201
  0.91390000   2.10219339
  0.91390000   2.42403580
  0.91390000   2.10219394
  0.91400000   2.10020126
  0.91400000   2.42566217
  0.91400000   2.10017642
  0.91400000   2.42565259
  0.91400000   2.10016566
  0.91400000   2.42564106
  0.91400000   2.10016151
  0.91400000   2.42562941
  0.91400000   2.10016038
  0.91400000   2.42561841
  0.91400000   2.10016054
  0.91400000   2.42560832
  0.91400000   2.10016120
  0.91400000   2.42559916
  0.91400000   2.10016200
  0.91400000   2.42559089
  0.91400000   2.10016276
  0.91400000   2.42558340
  0.91400000   2.10016345
  0.91400000   2.42557663
  0.91400000   2.10016404
  0.91400000   2.42557046
  0.91400000   2.10016454
  0.91410000   2.09818796
  0.91410000   2.42717876
  0.91410000   2.09816460
  0.91410000   2.42716863
  0.91410000   2.09815477
  0.91410000   2.42715680
  0.91410000   2.09815114
  0.91410000   2.42714502
  0.91410000   2.09815027
  0.91410000   2.42713398
  0.91410000   2.09815054
  0.91410000   2.42712389
  0.91410000   2.09815122
  0.91410000   2.42711477
  0.91410000   2.09815200
  0.91410000   2.42710654
  0.91410000   2.09815272
  0.91410000   2.42709911
  0.91410000   2.09815337
  0.91410000   2.42709238
  0.91410000   2.09815391
  0.91410000   2.42708625
  0.91410000   2.09815436
  0.91420000   2.09619318
  0.91420000   2.42867709
  0.91420000   2.09617142
  0.91420000   2.42866638
  0.91420000   2.09616254
  0.91420000   2.42865426
  0.91420000   2.09615943
  0.91420000   2.42864235
  0.91420000   2.09615880
  0.91420000   2.42863128
  0.91420000   2.09615916
  0.91420000   2.42862121
  0.91420000   2.09615986
  0.91420000   2.42861213
  0.91420000   2.09616061
  0.91420000   2.42860395
  0.91420000   2.09616130
  0.91420000   2.42859656
  0.91420000   2.09616190
  0.91420000   2.42858987
  0.91420000   2.09616239
  0.91420000   2.42858379
  0.91420000   2.09616280
  0.91430000   2.09421643
  0.91430000   2.43015769
  0.91430000   2.09419635
  0.91430000   2.43014641
  0.91430000   2.09418842
  0.91430000   2.43013401
  0.91430000   2.09418580
  0.91430000   2.43012199
  0.91430000   2.09418540
  0.91430000   2.43011090
  0.91430000   2.09418585
  0.91430000   2.43010085
  0.91430000   2.09418655
  0.91430000   2.43009181
  0.91430000   2.09418727
  0.91430000   2.43008367
  0.91430000   2.09418792
  0.91430000   2.43007633
  0.91430000   2.09418846
  0.91430000   2.43006969
  0.91430000   2.09418892
  0.91430000   2.43006364
  0.91430000   2.09418928
  0.91440000   2.09225727
  0.91440000   2.43162108
  0.91440000   2.09223888
  0.91440000   2.43160926
  0.91440000   2.09223188
  0.91440000   2.43159660
  0.91440000   2.09222972
  0.91440000   2.43158448
  0.91440000   2.09222952
  0.91440000   2.43157338
  0.91440000   2.09223004
  0.91440000   2.43156335
  0.91440000   2.09223074
  0.91440000   2.43155435
  0.91440000   2.09223143
  0.91440000   2.43154626
  0.91440000   2.09223203
  0.91440000   2.43153897
  0.91440000   2.09223253
  0.91440000   2.43153237
  0.91440000   2.09223294
  0.91440000   2.43152636
  0.91440000   2.09223326
  0.91450000   2.09031523
  0.91450000   2.43306777
  0.91450000   2.09029852
  0.91450000   2.43305543
  0.91450000   2.09029241
  0.91450000   2.43304253
  0.91450000   2.09029068
  0.91450000   2.43303034
  0.91450000   2.09029066
  0.91450000   2.43301923
  0.91450000   2.09029122
  0.91450000   2.43300924
  0.91450000   2.09029191
  0.91450000   2.43300028
  0.91450000   2.09029256
  0.91450000   2.43299223
  0.91450000   2.09029312
  0.91450000   2.43298499
  0.91450000   2.09029358
  0.91450000   2.43297843
  0.91450000   2.09029394
  0.91450000   2.43297246
  0.91450000   2.09029423
  0.91460000   2.08838985
  0.91460000   2.43449825
  0.91460000   2.08837479
  0.91460000   2.43448542
  0.91460000   2.08836952
  0.91460000   2.43447232
  0.91460000   2.08836817
  0.91460000   2.43446006
  0.91460000   2.08836830
  0.91460000   2.43444896
  0.91460000   2.08836890
  0.91460000   2.43443900
  0.91460000   2.08836957
  0.91460000   2.43443008
  0.91460000   2.08837018
  0.91460000   2.43442209
  0.91460000   2.08837070
  0.91460000   2.43441488
  0.91460000   2.08837111
  0.91460000   2.43440836
  0.91460000   2.08837143
  0.91460000   2.43440244
  0.91460000   2.08837168
  0.91470000   2.08648070
  0.91470000   2.43591298
  0.91470000   2.08646723
  0.91470000   2.43589970
  0.91470000   2.08646274
  0.91470000   2.43588642
  0.91470000   2.08646173
  0.91470000   2.43587412
  0.91470000   2.08646198
  0.91470000   2.43586302
  0.91470000   2.08646260
  0.91470000   2.43585310
  0.91470000   2.08646325
  0.91470000   2.43584424
  0.91470000   2.08646382
  0.91470000   2.43583629
  0.91470000   2.08646429
  0.91470000   2.43582912
  0.91470000   2.08646466
  0.91470000   2.43582265
  0.91470000   2.08646493
  0.91470000   2.43581676
  0.91470000   2.08646515
  0.91480000   2.08458735
  0.91480000   2.43731241
  0.91480000   2.08457539
  0.91480000   2.43729872
  0.91480000   2.08457161
  0.91480000   2.43728529
  0.91480000   2.08457090
  0.91480000   2.43727295
  0.91480000   2.08457125
  0.91480000   2.43726188
  0.91480000   2.08457188
  0.91480000   2.43725200
  0.91480000   2.08457250
  0.91480000   2.43724318
  0.91480000   2.08457303
  0.91480000   2.43723528
  0.91480000   2.08457345
  0.91480000   2.43722816
  0.91480000   2.08457377
  0.91480000   2.43722172
  0.91480000   2.08457401
  0.91480000   2.43721586
  0.91480000   2.08457419
  0.91490000   2.08270937
  0.91490000   2.43869696
  0.91490000   2.08269884
  0.91490000   2.43868291
  0.91490000   2.08269571
  0.91490000   2.43866935
  0.91490000   2.08269526
  0.91490000   2.43865700
  0.91490000   2.08269569
  0.91490000   2.43864596
  0.91490000   2.08269631
  0.91490000   2.43863612
  0.91490000   2.08269689
  0.91490000   2.43862735
  0.91490000   2.08269738
  0.91490000   2.43861949
  0.91490000   2.08269775
  0.91490000   2.43861242
  0.91490000   2.08269803
  0.91490000   2.43860601
  0.91490000   2.08269824
  0.91490000   2.43860019
  0.91490000   2.08269838
  0.91500000   2.08084637
  0.91500000   2.44006706
  0.91500000   2.08083717
  0.91500000   2.44005269
  0.91500000   2.08083461
  0.91500000   2.44003903
  0.91500000   2.08083439
  0.91500000   2.44002667
  0.91500000   2.08083487
  0.91500000   2.44001566
  0.91500000   2.08083548
  0.91500000   2.44000588
  0.91500000   2.08083602
  0.91500000   2.43999715
  0.91500000   2.08083646
  0.91500000   2.43998933
  0.91500000   2.08083679
  0.91500000   2.43998230
  0.91500000   2.08083703
  0.91500000   2.43997593
  0.91500000   2.08083720
  0.91500000   2.43997014
  0.91500000   2.08083730
  0.91510000   2.07899796
  0.91510000   2.44142310
  0.91510000   2.07898998
  0.91510000   2.44140845
  0.91510000   2.07898794
  0.91510000   2.44139471
  0.91510000   2.07898789
  0.91510000   2.44138236
  0.91510000   2.07898841
  0.91510000   2.44137138
  0.91510000   2.07898899
  0.91510000   2.44136164
  0.91510000   2.07898950
  0.91510000   2.44135297
  0.91510000   2.07898989
  0.91510000   2.44134520
  0.91510000   2.07899018
  0.91510000   2.44133820
  0.91510000   2.07899038
  0.91510000   2.44133187
  0.91510000   2.07899051
  0.91510000   2.44132611
  0.91510000   2.07899059
  0.91520000   2.07716374
  0.91520000   2.44276545
  0.91520000   2.07715688
  0.91520000   2.44275056
  0.91520000   2.07715529
  0.91520000   2.44273676
  0.91520000   2.07715539
  0.91520000   2.44272443
  0.91520000   2.07715593
  0.91520000   2.44271350
  0.91520000   2.07715649
  0.91520000   2.44270381
  0.91520000   2.07715695
  0.91520000   2.44269517
  0.91520000   2.07715729
  0.91520000   2.44268745
  0.91520000   2.07715754
  0.91520000   2.44268049
  0.91520000   2.07715770
  0.91520000   2.44267419
  0.91520000   2.07715780
  0.91520000   2.44266846
  0.91520000   2.07715784
  0.91530000   2.07534336
  0.91530000   2.44409448
  0.91530000   2.07533752
  0.91530000   2.44407939
  0.91530000   2.07533631
  0.91530000   2.44406555
  0.91530000   2.07533653
  0.91530000   2.44405324
  0.91530000   2.07533708
  0.91530000   2.44404236
  0.91530000   2.07533760
  0.91530000   2.44403271
  0.91530000   2.07533801
  0.91530000   2.44402413
  0.91530000   2.07533831
  0.91530000   2.44401644
  0.91530000   2.07533852
  0.91530000   2.44400952
  0.91530000   2.07533864
  0.91530000   2.44400326
  0.91530000   2.07533871
  0.91530000   2.44399756
  0.91530000   2.07533872
  0.91540000   2.07353645
  0.91540000   2.44541054
  0.91540000   2.07353153
  0.91540000   2.44539528
  0.91540000   2.07353066
  0.91540000   2.44538142
  0.91540000   2.07353097
  0.91540000   2.44536915
  0.91540000   2.07353150
  0.91540000   2.44535831
  0.91540000   2.07353199
  0.91540000   2.44534871
  0.91540000   2.07353236
  0.91540000   2.44534017
  0.91540000   2.07353262
  0.91540000   2.44533253
  0.91540000   2.07353278
  0.91540000   2.44532564
  0.91540000   2.07353287
  0.91540000   2.44531942
  0.91540000   2.07353290
  0.91540000   2.44531375
  0.91540000   2.07353289
  0.91550000   2.07174269
  0.91550000   2.44671396
  0.91550000   2.07173858
  0.91550000   2.44669857
  0.91550000   2.07173800
  0.91550000   2.44668470
  0.91550000   2.07173837
  0.91550000   2.44667246
  0.91550000   2.07173889
  0.91550000   2.44666167
  0.91550000   2.07173933
  0.91550000   2.44665213
  0.91550000   2.07173965
  0.91550000   2.44664363
  0.91550000   2.07173987
  0.91550000   2.44663603
  0.91550000   2.07173999
  0.91550000   2.44662918
  0.91550000   2.07174004
  0.91550000   2.44662298
  0.91550000   2.07174004
  0.91550000   2.44661734
  0.91550000   2.07174000
  0.91560000   2.06996174
  0.91560000   2.44800507
  0.91560000   2.06995835
  0.91560000   2.44798957
  0.91560000   2.06995800
  0.91560000   2.44797571
  0.91560000   2.06995841
  0.91560000   2.44796351
  0.91560000   2.06995891
  0.91560000   2.44795277
  0.91560000   2.06995931
  0.91560000   2.44794328
  0.91560000   2.06995958
  0.91560000   2.44793483
  0.91560000   2.06995975
  0.91560000   2.44792726
  0.91560000   2.06995984
  0.91560000   2.44792045
  0.91560000   2.06995986
  0.91560000   2.44791428
  0.91560000   2.06995983
  0.91560000   2.44790867
  0.91560000   2.06995976
  0.91570000   2.06819328
  0.91570000   2.44928416
  0.91570000   2.06819052
  0.91570000   2.44926859
  0.91570000   2.06819036
  0.91570000   2.44925475
  0.91570000   2.06819080
  0.91570000   2.44924259
  0.91570000   2.06819126
  0.91570000   2.44923190
  0.91570000   2.06819162
  0.91570000   2.44922246
  0.91570000   2.06819185
  0.91570000   2.44921405
  0.91570000   2.06819198
  0.91570000   2.44920652
  0.91570000   2.06819202
  0.91570000   2.44919974
  0.91570000   2.06819201
  0.91570000   2.44919360
  0.91570000   2.06819195
  0.91570000   2.44918801
  0.91570000   2.06819186
  0.91580000   2.06643701
  0.91580000   2.45055154
  0.91580000   2.06643481
  0.91580000   2.45053591
  0.91580000   2.06643479
  0.91580000   2.45052210
  0.91580000   2.06643524
  0.91580000   2.45050999
  0.91580000   2.06643567
  0.91580000   2.45049936
  0.91580000   2.06643597
  0.91580000   2.45048996
  0.91580000   2.06643616
  0.91580000   2.45048159
  0.91580000   2.06643625
  0.91580000   2.45047410
  0.91580000   2.06643626
  0.91580000   2.45046735
  0.91580000   2.06643622
  0.91580000   2.45046124
  0.91580000   2.06643613
  0.91580000   2.45045568
  0.91580000   2.06643602
  0.91590000   2.06469264
  0.91590000   2.45180749
  0.91590000   2.06469091
  0.91590000   2.45179183
  0.91590000   2.06469101
  0.91590000   2.45177805
  0.91590000   2.06469145
  0.91590000   2.45176600
  0.91590000   2.06469184
  0.91590000   2.45175541
  0.91590000   2.06469210
  0.91590000   2.45174606
  0.91590000   2.06469224
  0.91590000   2.45173773
  0.91590000   2.06469229
  0.91590000   2.45173028
  0.91590000   2.06469227
  0.91590000   2.45172356
  0.91590000   2.06469219
  0.91590000   2.45171748
  0.91590000   2.06469208
  0.91590000   2.45171194
  0.91590000   2.06469194
  0.91600000   2.06295988
  0.91600000   2.45305229
  0.91600000   2.06295855
  0.91600000   2.45303661
  0.91600000   2.06295875
  0.91600000   2.45302287
  0.91600000   2.06295917
  0.91600000   2.45301087
  0.91600000   2.06295952
  0.91600000   2.45300033
  0.91600000   2.06295973
  0.91600000   2.45299103
  0.91600000   2.06295983
  0.91600000   2.45298274
  0.91600000   2.06295984
  0.91600000   2.45297532
  0.91600000   2.06295978
  0.91600000   2.45296864
  0.91600000   2.06295968
  0.91600000   2.45296258
  0.91600000   2.06295954
  0.91600000   2.45295707
  0.91600000   2.06295938
  0.91610000   2.06123847
  0.91610000   2.45428618
  0.91610000   2.06123748
  0.91610000   2.45427050
  0.91610000   2.06123774
  0.91610000   2.45425681
  0.91610000   2.06123814
  0.91610000   2.45424486
  0.91610000   2.06123844
  0.91610000   2.45423438
  0.91610000   2.06123860
  0.91610000   2.45422512
  0.91610000   2.06123866
  0.91610000   2.45421687
  0.91610000   2.06123863
  0.91610000   2.45420949
  0.91610000   2.06123854
  0.91610000   2.45420283
  0.91610000   2.06123841
  0.91610000   2.45419680
  0.91610000   2.06123825
  0.91610000   2.45419132
  0.91610000   2.06123806
  0.91620000   2.05952814
  0.91620000   2.45550943
  0.91620000   2.05952744
  0.91620000   2.45549377
  0.91620000   2.05952774
  0.91620000   2.45548013
  0.91620000   2.05952810
  0.91620000   2.45546823
  0.91620000   2.05952835
  0.91620000   2.45545780
  0.91620000   2.05952847
  0.91620000   2.45544858
  0.91620000   2.05952848
  0.91620000   2.45544037
  0.91620000   2.05952842
  0.91620000   2.45543302
  0.91620000   2.05952830
  0.91620000   2.45542640
  0.91620000   2.05952814
  0.91620000   2.45542040
  0.91620000   2.05952795
  0.91620000   2.45541493
  0.91620000   2.05952775
  0.91630000   2.05782865
  0.91630000   2.45672229
  0.91630000   2.05782818
  0.91630000   2.45670664
  0.91630000   2.05782849
  0.91630000   2.45669305
  0.91630000   2.05782882
  0.91630000   2.45668122
  0.91630000   2.05782903
  0.91630000   2.45667083
  0.91630000   2.05782910
  0.91630000   2.45666166
  0.91630000   2.05782907
  0.91630000   2.45665349
  0.91630000   2.05782897
  0.91630000   2.45664617
  0.91630000   2.05782882
  0.91630000   2.45663957
  0.91630000   2.05782864
  0.91630000   2.45663360
  0.91630000   2.05782843
  0.91630000   2.45662816
  0.91630000   2.05782820
  0.91640000   2.05613976
  0.91640000   2.45792497
  0.91640000   2.05613947
  0.91640000   2.45790936
  0.91640000   2.05613979
  0.91640000   2.45789582
  0.91640000   2.05614008
  0.91640000   2.45788404
  0.91640000   2.05614023
  0.91640000   2.45787371
  0.91640000   2.05614026
  0.91640000   2.45786457
  0.91640000   2.05614019
  0.91640000   2.45785644
  0.91640000   2.05614006
  0.91640000   2.45784916
  0.91640000   2.05613988
  0.91640000   2.45784258
  0.91640000   2.05613967
  0.91640000   2.45783663
  0.91640000   2.05613943
  0.91640000   2.45783121
  0.91640000   2.05613919
  0.91650000   2.05446123
  0.91650000   2.45911770
  0.91650000   2.05446108
  0.91650000   2.45910214
  0.91650000   2.05446139
  0.91650000   2.45908866
  0.91650000   2.05446163
  0.91650000   2.45907693
  0.91650000   2.05446174
  0.91650000   2.45906665
  0.91650000   2.05446172
  0.91650000   2.45905755
  0.91650000   2.05446162
  0.91650000   2.45904946
  0.91650000   2.05446145
  0.91650000   2.45904220
  0.91650000   2.05446124
  0.91650000   2.45903566
  0.91650000   2.05446101
  0.91650000   2.45902973
  0.91650000   2.05446076
  0.91650000   2.45902434
  0.91650000   2.05446049
  0.91660000   2.05279284
  0.91660000   2.46030071
  0.91660000   2.05279280
  0.91660000   2.46028519
  0.91660000   2.05279309
  0.91660000   2.46027177
  0.91660000   2.05279328
  0.91660000   2.46026010
  0.91660000   2.05279334
  0.91660000   2.46024986
  0.91660000   2.05279328
  0.91660000   2.46024081
  0.91660000   2.05279314
  0.91660000   2.46023275
  0.91660000   2.05279294
  0.91660000   2.46022552
  0.91660000   2.05279271
  0.91660000   2.46021901
  0.91660000   2.05279245
  0.91660000   2.46021310
  0.91660000   2.05279217
  0.91660000   2.46020773
  0.91660000   2.05279189
  0.91670000   2.05113437
  0.91670000   2.46147419
  0.91670000   2.05113442
  0.91670000   2.46145873
  0.91670000   2.05113468
  0.91670000   2.46144537
  0.91670000   2.05113482
  0.91670000   2.46143375
  0.91670000   2.05113483
  0.91670000   2.46142356
  0.91670000   2.05113473
  0.91670000   2.46141455
  0.91670000   2.05113455
  0.91670000   2.46140652
  0.91670000   2.05113432
  0.91670000   2.46139932
  0.91670000   2.05113406
  0.91670000   2.46139284
  0.91670000   2.05113378
  0.91670000   2.46138696
  0.91670000   2.05113348
  0.91670000   2.46138160
  0.91670000   2.05113319
  0.91680000   2.04948563
  0.91680000   2.46263836
  0.91680000   2.04948572
  0.91680000   2.46262296
  0.91680000   2.04948595
  0.91680000   2.46260966
  0.91680000   2.04948605
  0.91680000   2.46259809
  0.91680000   2.04948601
  0.91680000   2.46258794
  0.91680000   2.04948586
  0.91680000   2.46257897
  0.91680000   2.04948565
  0.91680000   2.46257098
  0.91680000   2.04948540
  0.91680000   2.46256381
  0.91680000   2.04948511
  0.91680000   2.46255735
  0.91680000   2.04948481
  0.91680000   2.46255149
  0.91680000   2.04948449
  0.91680000   2.46254616
  0.91680000   2.04948417
  0.91690000   2.04784641
  0.91690000   2.46379340
  0.91690000   2.04784654
  0.91690000   2.46377806
  0.91690000   2.04784672
  0.91690000   2.46376482
  0.91690000   2.04784677
  0.91690000   2.46375331
  0.91690000   2.04784668
  0.91690000   2.46374320
  0.91690000   2.04784650
  0.91690000   2.46373427
  0.91690000   2.04784625
  0.91690000   2.46372631
  0.91690000   2.04784597
  0.91690000   2.46371917
  0.91690000   2.04784566
  0.91690000   2.46371274
  0.91690000   2.04784533
  0.91690000   2.46370690
  0.91690000   2.04784500
  0.91690000   2.46370158
  0.91690000   2.04784466
  0.91700000   2.04621653
  0.91700000   2.46493951
  0.91700000   2.04621666
  0.91700000   2.46492423
  0.91700000   2.04621680
  0.91700000   2.46491105
  0.91700000   2.04621679
  0.91700000   2.46489959
  0.91700000   2.04621666
  0.91700000   2.46488953
  0.91700000   2.04621644
  0.91700000   2.46488063
  0.91700000   2.04621616
  0.91700000   2.46487270
  0.91700000   2.04621585
  0.91700000   2.46486560
  0.91700000   2.04621552
  0.91700000   2.46485918
  0.91700000   2.04621517
  0.91700000   2.46485337
  0.91700000   2.04621482
  0.91700000   2.46484807
  0.91700000   2.04621447
  0.91710000   2.04459579
  0.91710000   2.46607685
  0.91710000   2.04459592
  0.91710000   2.46606164
  0.91710000   2.04459600
  0.91710000   2.46604852
  0.91710000   2.04459595
  0.91710000   2.46603711
  0.91710000   2.04459577
  0.91710000   2.46602710
  0.91710000   2.04459552
  0.91710000   2.46601824
  0.91710000   2.04459521
  0.91710000   2.46601034
  0.91710000   2.04459487
  0.91710000   2.46600326
  0.91710000   2.04459451
  0.91710000   2.46599687
  0.91710000   2.04459414
  0.91710000   2.46599108
  0.91710000   2.04459377
  0.91710000   2.46598580
  0.91710000   2.04459341
  0.91720000   2.04298401
  0.91720000   2.46720562
  0.91720000   2.04298413
  0.91720000   2.46719048
  0.91720000   2.04298416
  0.91720000   2.46717742
  0.91720000   2.04298406
  0.91720000   2.46716606
  0.91720000   2.04298384
  0.91720000   2.46715608
  0.91720000   2.04298355
  0.91720000   2.46714726
  0.91720000   2.04298321
  0.91720000   2.46713940
  0.91720000   2.04298284
  0.91720000   2.46713234
  0.91720000   2.04298246
  0.91720000   2.46712598
  0.91720000   2.04298207
  0.91720000   2.46712021
  0.91720000   2.04298169
  0.91720000   2.46711495
  0.91720000   2.04298131
  0.91730000   2.04138104
  0.91730000   2.46832598
  0.91730000   2.04138112
  0.91730000   2.46831090
  0.91730000   2.04138111
  0.91730000   2.46829790
  0.91730000   2.04138095
  0.91730000   2.46828659
  0.91730000   2.04138070
  0.91730000   2.46827666
  0.91730000   2.04138037
  0.91730000   2.46826787
  0.91730000   2.04138000
  0.91730000   2.46826004
  0.91730000   2.04137961
  0.91730000   2.46825301
  0.91730000   2.04137921
  0.91730000   2.46824667
  0.91730000   2.04137880
  0.91730000   2.46824092
  0.91730000   2.04137840
  0.91730000   2.46823568
  0.91730000   2.04137800
  0.91740000   2.03978670
  0.91740000   2.46943808
  0.91740000   2.03978675
  0.91740000   2.46942308
  0.91740000   2.03978668
  0.91740000   2.46941014
  0.91740000   2.03978647
  0.91740000   2.46939887
  0.91740000   2.03978618
  0.91740000   2.46938898
  0.91740000   2.03978581
  0.91740000   2.46938023
  0.91740000   2.03978542
  0.91740000   2.46937243
  0.91740000   2.03978500
  0.91740000   2.46936543
  0.91740000   2.03978458
  0.91740000   2.46935911
  0.91740000   2.03978415
  0.91740000   2.46935338
  0.91740000   2.03978373
  0.91740000   2.46934816
  0.91740000   2.03978332
  0.91750000   2.03820083
  0.91750000   2.47054210
  0.91750000   2.03820083
  0.91750000   2.47052716
  0.91750000   2.03820071
  0.91750000   2.47051428
  0.91750000   2.03820046
  0.91750000   2.47050307
  0.91750000   2.03820012
  0.91750000   2.47049322
  0.91750000   2.03819973
  0.91750000   2.47048450
  0.91750000   2.03819930
  0.91750000   2.47047673
  0.91750000   2.03819886
  0.91750000   2.47046975
  0.91750000   2.03819841
  0.91750000   2.47046346
  0.91750000   2.03819797
  0.91750000   2.47045775
  0.91750000   2.03819754
  0.91750000   2.47045255
  0.91750000   2.03819711
  0.91760000   2.03662327
  0.91760000   2.47163818
  0.91760000   2.03662322
  0.91760000   2.47162332
  0.91760000   2.03662305
  0.91760000   2.47161049
  0.91760000   2.03662275
  0.91760000   2.47159933
  0.91760000   2.03662238
  0.91760000   2.47158952
  0.91760000   2.03662195
  0.91760000   2.47158083
  0.91760000   2.03662150
  0.91760000   2.47157309
  0.91760000   2.03662104
  0.91760000   2.47156614
  0.91760000   2.03662057
  0.91760000   2.47155987
  0.91760000   2.03662011
  0.91760000   2.47155418
  0.91760000   2.03661966
  0.91760000   2.47154899
  0.91760000   2.03661922
  0.91770000   2.03505388
  0.91770000   2.47272648
  0.91770000   2.03505378
  0.91770000   2.47271168
  0.91770000   2.03505355
  0.91770000   2.47269892
  0.91770000   2.03505321
  0.91770000   2.47268780
  0.91770000   2.03505280
  0.91770000   2.47267803
  0.91770000   2.03505234
  0.91770000   2.47266938
  0.91770000   2.03505186
  0.91770000   2.47266166
  0.91770000   2.03505138
  0.91770000   2.47265474
  0.91770000   2.03505089
  0.91770000   2.47264849
  0.91770000   2.03505042
  0.91770000   2.47264282
  0.91770000   2.03504995
  0.91770000   2.47263765
  0.91770000   2.03504950
  0.91780000   2.03349251
  0.91780000   2.47380713
  0.91780000   2.03349236
  0.91780000   2.47379241
  0.91780000   2.03349208
  0.91780000   2.47377970
  0.91780000   2.03349169
  0.91780000   2.47376863
  0.91780000   2.03349124
  0.91780000   2.47375890
  0.91780000   2.03349075
  0.91780000   2.47375028
  0.91780000   2.03349025
  0.91780000   2.47374259
  0.91780000   2.03348974
  0.91780000   2.47373569
  0.91780000   2.03348924
  0.91780000   2.47372946
  0.91780000   2.03348875
  0.91780000   2.47372381
  0.91780000   2.03348827
  0.91780000   2.47371867
  0.91780000   2.03348780
  0.91790000   2.03193902
  0.91790000   2.47488029
  0.91790000   2.03193881
  0.91790000   2.47486563
  0.91790000   2.03193847
  0.91790000   2.47485298
  0.91790000   2.03193805
  0.91790000   2.47484195
  0.91790000   2.03193756
  0.91790000   2.47483226
  0.91790000   2.03193705
  0.91790000   2.47482368
  0.91790000   2.03193652
  0.91790000   2.47481602
  0.91790000   2.03193599
  0.91790000   2.47480914
  0.91790000   2.03193547
  0.91790000   2.47480294
  0.91790000   2.03193496
  0.91790000   2.47479731
  0.91790000   2.03193446
  0.91790000   2.47479218
  0.91790000   2.03193399
  0.91800000   2.03039327
  0.91800000   2.47594607
  0.91800000   2.03039300
  0.91800000   2.47593149
  0.91800000   2.03039262
  0.91800000   2.47591889
  0.91800000   2.03039215
  0.91800000   2.47590791
  0.91800000   2.03039163
  0.91800000   2.47589826
  0.91800000   2.03039109
  0.91800000   2.47588971
  0.91800000   2.03039053
  0.91800000   2.47588208
  0.91800000   2.03038998
  0.91800000   2.47587523
  0.91800000   2.03038944
  0.91800000   2.47586904
  0.91800000   2.03038892
  0.91800000   2.47586343
  0.91800000   2.03038841
  0.91800000   2.47585832
  0.91800000   2.03038792
  0.91810000   2.02885513
  0.91810000   2.47700462
  0.91810000   2.02885480
  0.91810000   2.47699011
  0.91810000   2.02885437
  0.91810000   2.47697757
  0.91810000   2.02885386
  0.91810000   2.47696664
  0.91810000   2.02885331
  0.91810000   2.47695703
  0.91810000   2.02885274
  0.91810000   2.47694851
  0.91810000   2.02885216
  0.91810000   2.47694090
  0.91810000   2.02885159
  0.91810000   2.47693408
  0.91810000   2.02885104
  0.91810000   2.47692791
  0.91810000   2.02885050
  0.91810000   2.47692232
  0.91810000   2.02884998
  0.91810000   2.47691722
  0.91810000   2.02884947
  0.91820000   2.02732447
  0.91820000   2.47805607
  0.91820000   2.02732409
  0.91820000   2.47804163
  0.91820000   2.02732361
  0.91820000   2.47802915
  0.91820000   2.02732306
  0.91820000   2.47801826
  0.91820000   2.02732248
  0.91820000   2.47800868
  0.91820000   2.02732188
  0.91820000   2.47800020
  0.91820000   2.02732128
  0.91820000   2.47799262
  0.91820000   2.02732069
  0.91820000   2.47798582
  0.91820000   2.02732012
  0.91820000   2.47797967
  0.91820000   2.02731956
  0.91820000   2.47797410
  0.91820000   2.02731903
  0.91820000   2.47796902
  0.91820000   2.02731851
  0.91830000   2.02580117
  0.91830000   2.47910054
  0.91830000   2.02580073
  0.91830000   2.47908617
  0.91830000   2.02580020
  0.91830000   2.47907374
  0.91830000   2.02579962
  0.91830000   2.47906290
  0.91830000   2.02579900
  0.91830000   2.47905336
  0.91830000   2.02579838
  0.91830000   2.47904490
  0.91830000   2.02579776
  0.91830000   2.47903736
  0.91830000   2.02579715
  0.91830000   2.47903058
  0.91830000   2.02579656
  0.91830000   2.47902446
  0.91830000   2.02579599
  0.91830000   2.47901890
  0.91830000   2.02579544
  0.91830000   2.47901383
  0.91830000   2.02579492
  0.91840000   2.02428511
  0.91840000   2.48013814
  0.91840000   2.02428461
  0.91840000   2.48012384
  0.91840000   2.02428404
  0.91840000   2.48011147
  0.91840000   2.02428342
  0.91840000   2.48010068
  0.91840000   2.02428277
  0.91840000   2.48009118
  0.91840000   2.02428212
  0.91840000   2.48008275
  0.91840000   2.02428148
  0.91840000   2.48007523
  0.91840000   2.02428085
  0.91840000   2.48006848
  0.91840000   2.02428024
  0.91840000   2.48006238
  0.91840000   2.02427966
  0.91840000   2.48005684
  0.91840000   2.02427910
  0.91840000   2.48005179
  0.91840000   2.02427856
  0.91850000   2.02277617
  0.91850000   2.48116900
  0.91850000   2.02277561
  0.91850000   2.48115477
  0.91850000   2.02277499
  0.91850000   2.48114246
  0.91850000   2.02277433
  0.91850000   2.48113171
  0.91850000   2.02277366
  0.91850000   2.48112225
  0.91850000   2.02277298
  0.91850000   2.48111386
  0.91850000   2.02277232
  0.91850000   2.48110637
  0.91850000   2.02277168
  0.91850000   2.48109964
  0.91850000   2.02277105
  0.91850000   2.48109355
  0.91850000   2.02277046
  0.91850000   2.48108803
  0.91850000   2.02276988
  0.91850000   2.48108300
  0.91850000   2.02276934
  0.91860000   2.02127423
  0.91860000   2.48219323
  0.91860000   2.02127361
  0.91860000   2.48217908
  0.91860000   2.02127295
  0.91860000   2.48216682
  0.91860000   2.02127226
  0.91860000   2.48215612
  0.91860000   2.02127156
  0.91860000   2.48214670
  0.91860000   2.02127086
  0.91860000   2.48213834
  0.91860000   2.02127017
  0.91860000   2.48213087
  0.91860000   2.02126951
  0.91860000   2.48212416
  0.91860000   2.02126887
  0.91860000   2.48211810
  0.91860000   2.02126826
  0.91860000   2.48211260
  0.91860000   2.02126768
  0.91860000   2.48210758
  0.91860000   2.02126712
  0.91870000   2.01977919
  0.91870000   2.48321094
  0.91870000   2.01977852
  0.91870000   2.48319686
  0.91870000   2.01977781
  0.91870000   2.48318467
  0.91870000   2.01977708
  0.91870000   2.48317401
  0.91870000   2.01977635
  0.91870000   2.48316463
  0.91870000   2.01977563
  0.91870000   2.48315630
  0.91870000   2.01977492
  0.91870000   2.48314886
  0.91870000   2.01977425
  0.91870000   2.48314218
  0.91870000   2.01977359
  0.91870000   2.48313614
  0.91870000   2.01977297
  0.91870000   2.48313065
  0.91870000   2.01977238
  0.91870000   2.48312565
  0.91870000   2.01977181
  0.91880000   2.01829093
  0.91880000   2.48422224
  0.91880000   2.01829020
  0.91880000   2.48420824
  0.91880000   2.01828945
  0.91880000   2.48419611
  0.91880000   2.01828869
  0.91880000   2.48418550
  0.91880000   2.01828793
  0.91880000   2.48417615
  0.91880000   2.01828719
  0.91880000   2.48416785
  0.91880000   2.01828646
  0.91880000   2.48416044
  0.91880000   2.01828577
  0.91880000   2.48415378
  0.91880000   2.01828510
  0.91880000   2.48414776
  0.91880000   2.01828447
  0.91880000   2.48414230
  0.91880000   2.01828386
  0.91880000   2.48413731
  0.91880000   2.01828328
  0.91890000   2.01680935
  0.91890000   2.48522724
  0.91890000   2.01680857
  0.91890000   2.48521332
  0.91890000   2.01680778
  0.91890000   2.48520124
  0.91890000   2.01680698
  0.91890000   2.48519068
  0.91890000   2.01680620
  0.91890000   2.48518137
  0.91890000   2.01680543
  0.91890000   2.48517310
  0.91890000   2.01680469
  0.91890000   2.48516572
  0.91890000   2.01680398
  0.91890000   2.48515909
  0.91890000   2.01680330
  0.91890000   2.48515309
  0.91890000   2.01680265
  0.91890000   2.48514764
  0.91890000   2.01680203
  0.91890000   2.48514267
  0.91890000   2.01680145
  0.91900000   2.01533436
  0.91900000   2.48622603
  0.91900000   2.01533352
  0.91900000   2.48621219
  0.91900000   2.01533268
  0.91900000   2.48620017
  0.91900000   2.01533186
  0.91900000   2.48618966
  0.91900000   2.01533105
  0.91900000   2.48618039
  0.91900000   2.01533026
  0.91900000   2.48617216
  0.91900000   2.01532950
  0.91900000   2.48616480
  0.91900000   2.01532877
  0.91900000   2.48615819
  0.91900000   2.01532808
  0.91900000   2.48615221
  0.91900000   2.01532742
  0.91900000   2.48614678
  0.91900000   2.01532679
  0.91900000   2.48614183
  0.91900000   2.01532619
  0.91910000   2.01386584
  0.91910000   2.48721871
  0.91910000   2.01386494
  0.91910000   2.48720495
  0.91910000   2.01386407
  0.91910000   2.48719300
  0.91910000   2.01386321
  0.91910000   2.48718254
  0.91910000   2.01386237
  0.91910000   2.48717331
  0.91910000   2.01386156
  0.91910000   2.48716511
  0.91910000   2.01386079
  0.91910000   2.48715778
  0.91910000   2.01386004
  0.91910000   2.48715119
  0.91910000   2.01385934
  0.91910000   2.48714524
  0.91910000   2.01385867
  0.91910000   2.48713983
  0.91910000   2.01385803
  0.91910000   2.48713489
  0.91910000   2.01385742
  0.91920000   2.01240370
  0.91920000   2.48820538
  0.91920000   2.01240275
  0.91920000   2.48819171
  0.91920000   2.01240184
  0.91920000   2.48817982
  0.91920000   2.01240095
  0.91920000   2.48816941
  0.91920000   2.01240008
  0.91920000   2.48816023
  0.91920000   2.01239925
  0.91920000   2.48815206
  0.91920000   2.01239846
  0.91920000   2.48814476
  0.91920000   2.01239770
  0.91920000   2.48813820
  0.91920000   2.01239698
  0.91920000   2.48813226
  0.91920000   2.01239630
  0.91920000   2.48812687
  0.91920000   2.01239565
  0.91920000   2.48812195
  0.91920000   2.01239504
  0.91930000   2.01094785
  0.91930000   2.48918613
  0.91930000   2.01094685
  0.91930000   2.48917256
  0.91930000   2.01094589
  0.91930000   2.48916074
  0.91930000   2.01094497
  0.91930000   2.48915038
  0.91930000   2.01094409
  0.91930000   2.48914123
  0.91930000   2.01094324
  0.91930000   2.48913311
  0.91930000   2.01094242
  0.91930000   2.48912584
  0.91930000   2.01094165
  0.91930000   2.48911929
  0.91930000   2.01094092
  0.91930000   2.48911338
  0.91930000   2.01094023
  0.91930000   2.48910801
  0.91930000   2.01093957
  0.91930000   2.48910310
  0.91930000   2.01093895
  0.91940000   2.00949820
  0.91940000   2.49016105
  0.91940000   2.00949714
  0.91940000   2.49014757
  0.91940000   2.00949614
  0.91940000   2.49013583
  0.91940000   2.00949519
  0.91940000   2.49012553
  0.91940000   2.00949428
  0.91940000   2.49011642
  0.91940000   2.00949341
  0.91940000   2.49010833
  0.91940000   2.00949259
  0.91940000   2.49010109
  0.91940000   2.00949180
  0.91940000   2.49009458
  0.91940000   2.00949106
  0.91940000   2.49008868
  0.91940000   2.00949035
  0.91940000   2.49008333
  0.91940000   2.00948968
  0.91940000   2.49007844
  0.91940000   2.00948905
  0.91950000   2.00805466
  0.91950000   2.49113023
  0.91950000   2.00805354
  0.91950000   2.49111686
  0.91950000   2.00805250
  0.91950000   2.49110519
  0.91950000   2.00805152
  0.91950000   2.49109495
  0.91950000   2.00805059
  0.91950000   2.49108589
  0.91950000   2.00804970
  0.91950000   2.49107783
  0.91950000   2.00804885
  0.91950000   2.49107062
  0.91950000   2.00804806
  0.91950000   2.49106414
  0.91950000   2.00804730
  0.91950000   2.49105827
  0.91950000   2.00804658
  0.91950000   2.49105293
  0.91950000   2.00804591
  0.91950000   2.49104806
  0.91950000   2.00804527
  0.91960000   2.00661714
  0.91960000   2.49209375
  0.91960000   2.00661595
  0.91960000   2.49208049
  0.91960000   2.00661488
  0.91960000   2.49206891
  0.91960000   2.00661387
  0.91960000   2.49205872
  0.91960000   2.00661291
  0.91960000   2.49204972
  0.91960000   2.00661200
  0.91960000   2.49204170
  0.91960000   2.00661114
  0.91960000   2.49203452
  0.91960000   2.00661033
  0.91960000   2.49202806
  0.91960000   2.00660956
  0.91960000   2.49202221
  0.91960000   2.00660884
  0.91960000   2.49201689
  0.91960000   2.00660815
  0.91960000   2.49201204
  0.91960000   2.00660751
  0.91970000   2.00518556
  0.91970000   2.49305168
  0.91970000   2.00518430
  0.91970000   2.49303855
  0.91970000   2.00518319
  0.91970000   2.49302706
  0.91970000   2.00518215
  0.91970000   2.49301694
  0.91970000   2.00518116
  0.91970000   2.49300798
  0.91970000   2.00518024
  0.91970000   2.49300001
  0.91970000   2.00517936
  0.91970000   2.49299286
  0.91970000   2.00517854
  0.91970000   2.49298643
  0.91970000   2.00517776
  0.91970000   2.49298060
  0.91970000   2.00517702
  0.91970000   2.49297531
  0.91970000   2.00517633
  0.91970000   2.49297047
  0.91970000   2.00517568
  0.91980000   2.00375985
  0.91980000   2.49400410
  0.91980000   2.00375851
  0.91980000   2.49399112
  0.91980000   2.00375735
  0.91980000   2.49397972
  0.91980000   2.00375627
  0.91980000   2.49396968
  0.91980000   2.00375527
  0.91980000   2.49396078
  0.91980000   2.00375432
  0.91980000   2.49395284
  0.91980000   2.00375343
  0.91980000   2.49394573
  0.91980000   2.00375260
  0.91980000   2.49393933
  0.91980000   2.00375181
  0.91980000   2.49393353
  0.91980000   2.00375106
  0.91980000   2.49392825
  0.91980000   2.00375036
  0.91980000   2.49392343
  0.91980000   2.00374970
  0.91990000   2.00233997
  0.91990000   2.49495108
  0.91990000   2.00233848
  0.91990000   2.49493826
  0.91990000   2.00233727
  0.91990000   2.49492698
  0.91990000   2.00233617
  0.91990000   2.49491701
  0.91990000   2.00233514
  0.91990000   2.49490817
  0.91990000   2.00233418
  0.91990000   2.49490028
  0.91990000   2.00233327
  0.91990000   2.49489321
  0.91990000   2.00233242
  0.91990000   2.49488684
  0.91990000   2.00233162
  0.91990000   2.49488107
  0.91990000   2.00233087
  0.91990000   2.49487581
  0.91990000   2.00233016
  0.91990000   2.49487102
  0.91990000   2.00232949
  0.92000000   2.00092591
  0.92000000   2.49589267
  0.92000000   2.00092413
  0.92000000   2.49588005
  0.92000000   2.00092289
  0.92000000   2.49586889
  0.92000000   2.00092175
  0.92000000   2.49585902
  0.92000000   2.00092070
  0.92000000   2.49585024
  0.92000000   2.00091972
  0.92000000   2.49584241
  0.92000000   2.00091880
  0.92000000   2.49583538
  0.92000000   2.00091794
  0.92000000   2.49582904
  0.92000000   2.00091712
  0.92000000   2.49582329
  0.92000000   2.00091636
  0.92000000   2.49581807
  0.92000000   2.00091565
  0.92000000   2.49581329
  0.92000000   2.00091497
  0.92010000   1.99951775
  0.92010000   2.49682894
  0.92010000   1.99951537
  0.92010000   2.49681653
  0.92010000   1.99951413
  0.92010000   2.49680553
  0.92010000   1.99951294
  0.92010000   2.49679576
  0.92010000   1.99951187
  0.92010000   2.49678706
  0.92010000   1.99951087
  0.92010000   2.49677929
  0.92010000   1.99950994
  0.92010000   2.49677230
  0.92010000   1.99950906
  0.92010000   2.49676600
  0.92010000   1.99950824
  0.92010000   2.49676029
  0.92010000   1.99950747
  0.92010000   2.49675508
  0.92010000   1.99950675
  0.92010000   2.49675033
  0.92010000   1.99950606
  0.92020000   1.99811530
  0.92020000   2.49775987
  0.92020000   1.99811215
  0.92020000   2.49774773
  0.92020000   1.99811091
  0.92020000   2.49773693
  0.92020000   1.99810967
  0.92020000   2.49772729
  0.92020000   1.99810857
  0.92020000   2.49771869
  0.92020000   1.99810755
  0.92020000   2.49771098
  0.92020000   1.99810660
  0.92020000   2.49770405
  0.92020000   1.99810572
  0.92020000   2.49769779
  0.92020000   1.99810489
  0.92020000   2.49769211
  0.92020000   1.99810411
  0.92020000   2.49768694
  0.92020000   1.99810338
  0.92020000   2.49768221
  0.92020000   1.99810269
  0.92030000   1.99671651
  0.92030000   2.49868531
  0.92030000   1.99671467
  0.92030000   2.49867369
  0.92030000   1.99671313
  0.92030000   2.49866313
  0.92030000   1.99671187
  0.92030000   2.49865366
  0.92030000   1.99671073
  0.92030000   2.49864518
  0.92030000   1.99670970
  0.92030000   2.49863756
  0.92030000   1.99670873
  0.92030000   2.49863069
  0.92030000   1.99670783
  0.92030000   2.49862448
  0.92030000   1.99670699
  0.92030000   2.49861884
  0.92030000   1.99670621
  0.92030000   2.49861370
  0.92030000   1.99670547
  0.92030000   2.49860900
  0.92030000   1.99670478
  0.92040000   1.99531387
  0.92040000   2.49960453
  0.92040000   1.99532393
  0.92040000   2.49959441
  0.92040000   1.99532061
  0.92040000   2.49958411
  0.92040000   1.99531948
  0.92040000   2.49957488
  0.92040000   1.99531828
  0.92040000   2.49956655
  0.92040000   1.99531722
  0.92040000   2.49955904
  0.92040000   1.99531624
  0.92040000   2.49955226
  0.92040000   1.99531533
  0.92040000   2.49954611
  0.92040000   1.99531449
  0.92040000   2.49954053
  0.92040000   1.99531369
  0.92040000   2.49953543
  0.92040000   1.99531295
  0.92040000   2.49953076
  0.92040000   1.99531225
  0.92050000   1.99392059
  0.92050000   2.50051777
  0.92050000   1.99393850
  0.92050000   2.50050953
  0.92050000   1.99393349
  0.92050000   2.50049974
  0.92050000   1.99393245
  0.92050000   2.50049089
  0.92050000   1.99393115
  0.92050000   2.50048278
  0.92050000   1.99393007
  0.92050000   2.50047544
  0.92050000   1.99392907
  0.92050000   2.50046877
  0.92050000   1.99392815
  0.92050000   2.50046272
  0.92050000   1.99392729
  0.92050000   2.50045720
  0.92050000   1.99392649
  0.92050000   2.50045216
  0.92050000   1.99392574
  0.92050000   2.50044753
  0.92050000   1.99392503
  0.92060000   1.99276774
  0.92060000   2.50144024
  0.92060000   1.99252498
  0.92060000   2.50141541
  0.92060000   1.99255700
  0.92060000   2.50140985
  0.92060000   1.99255000
  0.92060000   2.50140129
  0.92060000   1.99254942
  0.92060000   2.50139368
  0.92060000   1.99254815
  0.92060000   2.50138662
  0.92060000   1.99254713
  0.92060000   2.50138015
  0.92060000   1.99254619
  0.92060000   2.50137424
  0.92060000   1.99254532
  0.92060000   2.50136884
  0.92060000   1.99254452
  0.92060000   2.50136388
  0.92060000   1.99254376
  0.92060000   2.50135932
  0.92060000   1.99254305
  0.92070000   1.99080828
  0.92070000   2.50225725
  0.92070000   1.99126945
  0.92070000   2.50231803
  0.92070000   1.99116656
  0.92070000   2.50230869
  0.92070000   1.99117688
  0.92070000   2.50230435
  0.92070000   1.99117262
  0.92070000   2.50229790
  0.92070000   1.99117157
  0.92070000   2.50229170
  0.92070000   1.99117038
  0.92070000   2.50228577
  0.92070000   1.99116940
  0.92070000   2.50228023
  0.92070000   1.99116851
  0.92070000   2.50227508
  0.92070000   1.99116769
  0.92070000   2.50227032
  0.92070000   1.99116693
  0.92070000   2.50226592
  0.92070000   1.99116622
  0.92080000   2.42012108
  0.92080000   2.13704999
  0.92080000   2.46895744
  0.92080000   2.05175907
  0.92080000   2.50033204
  0.92080000   1.99460617
  0.92080000   2.50349220
  0.92080000   1.98915066
  0.92080000   2.50312093
  0.92080000   1.98992026
  0.92080000   2.50319442
  0.92080000   1.98978190
  0.92080000   2.50318161
  0.92080000   1.98980194
  0.92080000   2.50318026
  0.92080000   1.98979689
  0.92080000   2.50317607
  0.92080000   1.98979649
  0.92080000   2.50317213
  0.92080000   1.98979552
  0.92080000   2.50316820
  0.92080000   1.98979478
  0.92080000   2.50316444
  0.92090000   2.50393437
  0.92090000   1.98880424
  0.92090000   2.50415453
  0.92090000   1.98837816
  0.92090000   2.50411210
  0.92090000   1.98844803
  0.92090000   2.50411177
  0.92090000   1.98843334
  0.92090000   2.50410341
  0.92090000   1.98843423
  0.92090000   2.50409672
  0.92090000   1.98843267
  0.92090000   2.50409023
  0.92090000   1.98843172
  0.92090000   2.50408428
  0.92090000   1.98843077
  0.92090000   2.50407879
  0.92090000   1.98842991
  0.92090000   2.50407375
  0.92090000   1.98842912
  0.92090000   2.50406910
  0.92090000   1.98842837
  0.92090000   2.50406481
  0.92100000   2.50506268
  0.92100000   1.98702308
  0.92100000   2.50502008
  0.92100000   1.98708720
  0.92100000   2.50501730
  0.92100000   1.98707302
  0.92100000   2.50500727
  0.92100000   1.98707388
  0.92100000   2.50499927
  0.92100000   1.98707223
  0.92100000   2.50499173
  0.92100000   1.98707120
  0.92100000   2.50498490
  0.92100000   1.98707018
  0.92100000   2.50497868
  0.92100000   1.98706925
  0.92100000   2.50497301
  0.92100000   1.98706839
  0.92100000   2.50496783
  0.92100000   1.98706758
  0.92100000   2.50496308
  0.92100000   1.98706683
  0.92100000   2.50495871
  0.92110000   2.50591905
  0.92110000   1.98573975
  0.92110000   2.50591927
  0.92110000   1.98571632
  0.92110000   2.50590681
  0.92110000   1.98571889
  0.92110000   2.50589774
  0.92110000   1.98571675
  0.92110000   2.50588908
  0.92110000   1.98571571
  0.92110000   2.50588135
  0.92110000   1.98571458
  0.92110000   2.50587436
  0.92110000   1.98571358
  0.92110000   2.50586803
  0.92110000   1.98571264
  0.92110000   2.50586228
  0.92110000   1.98571176
  0.92110000   2.50585704
  0.92110000   1.98571095
  0.92110000   2.50585225
  0.92110000   1.98571018
  0.92110000   2.50584785
  0.92120000   2.50681371
  0.92120000   1.98437304
  0.92120000   2.50680386
  0.92120000   1.98436726
  0.92120000   2.50679256
  0.92120000   1.98436659
  0.92120000   2.50678284
  0.92120000   1.98436511
  0.92120000   2.50677406
  0.92120000   1.98436395
  0.92120000   2.50676619
  0.92120000   1.98436284
  0.92120000   2.50675911
  0.92120000   1.98436182
  0.92120000   2.50675272
  0.92120000   1.98436087
  0.92120000   2.50674693
  0.92120000   1.98435999
  0.92120000   2.50674166
  0.92120000   1.98435917
  0.92120000   2.50673685
  0.92120000   1.98435840
  0.92120000   2.50673243
  0.92130000   2.50770004
  0.92130000   1.98301675
  0.92130000   2.50768387
  0.92130000   1.98302221
  0.92130000   2.50767343
  0.92130000   1.98301925
  0.92130000   2.50766328
  0.92130000   1.98301826
  0.92130000   2.50765443
  0.92130000   1.98301699
  0.92130000   2.50764647
  0.92130000   1.98301589
  0.92130000   2.50763935
  0.92130000   1.98301486
  0.92130000   2.50763292
  0.92130000   1.98301391
  0.92130000   2.50762710
  0.92130000   1.98301302
  0.92130000   2.50762181
  0.92130000   1.98301219
  0.92130000   2.50761698
  0.92130000   1.98301141
  0.92130000   2.50761256
  0.92140000   2.50857565
  0.92140000   1.98167662
  0.92140000   2.50856039
  0.92140000   1.98167960
  0.92140000   2.50854949
  0.92140000   1.98167715
  0.92140000   2.50853927
  0.92140000   1.98167606
  0.92140000   2.50853033
  0.92140000   1.98167480
  0.92140000   2.50852232
  0.92140000   1.98167369
  0.92140000   2.50851516
  0.92140000   1.98167265
  0.92140000   2.50850871
  0.92140000   1.98167169
  0.92140000   2.50850288
  0.92140000   1.98167079
  0.92140000   2.50849758
  0.92140000   1.98166995
  0.92140000   2.50849274
  0.92140000   1.98166917
  0.92140000   2.50848830
  0.92150000   2.50944555
  0.92150000   1.98034334
  0.92150000   2.50943269
  0.92150000   1.98034118
  0.92150000   2.50942107
  0.92150000   1.98033987
  0.92150000   2.50941089
  0.92150000   1.98033852
  0.92150000   2.50940186
  0.92150000   1.98033730
  0.92150000   2.50939383
  0.92150000   1.98033618
  0.92150000   2.50938664
  0.92150000   1.98033513
  0.92150000   2.50938018
  0.92150000   1.98033415
  0.92150000   2.50937433
  0.92150000   1.98033325
  0.92150000   2.50936902
  0.92150000   1.98033240
  0.92150000   2.50936418
  0.92150000   1.98033161
  0.92150000   2.50935974
  0.92160000   2.51031198
  0.92160000   1.97901285
  0.92160000   2.51030045
  0.92160000   1.97900777
  0.92160000   2.51028835
  0.92160000   1.97900715
  0.92160000   2.51027820
  0.92160000   1.97900562
  0.92160000   2.51026911
  0.92160000   1.97900444
  0.92160000   2.51026106
  0.92160000   1.97900329
  0.92160000   2.51025386
  0.92160000   1.97900224
  0.92160000   2.51024739
  0.92160000   1.97900125
  0.92160000   2.51024153
  0.92160000   1.97900034
  0.92160000   2.51023622
  0.92160000   1.97899949
  0.92160000   2.51023137
  0.92160000   1.97899869
  0.92160000   2.51022694
  0.92170000   2.51117523
  0.92170000   1.97768474
  0.92170000   2.51116367
  0.92170000   1.97767945
  0.92170000   2.51115146
  0.92170000   1.97767890
  0.92170000   2.51114128
  0.92170000   1.97767733
  0.92170000   2.51113216
  0.92170000   1.97767615
  0.92170000   2.51112409
  0.92170000   1.97767499
  0.92170000   2.51111688
  0.92170000   1.97767392
  0.92170000   2.51111039
  0.92170000   1.97767293
  0.92170000   2.51110454
  0.92170000   1.97767201
  0.92170000   2.51109922
  0.92170000   1.97767115
  0.92170000   2.51109438
  0.92170000   1.97767034
  0.92170000   2.51108994
  0.92180000   2.51203498
  0.92180000   1.97635977
  0.92180000   2.51202253
  0.92180000   1.97635600
  0.92180000   2.51201044
  0.92180000   1.97635509
  0.92180000   2.51200018
  0.92180000   1.97635359
  0.92180000   2.51199106
  0.92180000   1.97635238
  0.92180000   2.51198298
  0.92180000   1.97635121
  0.92180000   2.51197575
  0.92180000   1.97635013
  0.92180000   2.51196927
  0.92180000   1.97634914
  0.92180000   2.51196341
  0.92180000   1.97634821
  0.92180000   2.51195810
  0.92180000   1.97634734
  0.92180000   2.51195325
  0.92180000   1.97634653
  0.92180000   2.51194881
  0.92190000   2.51289083
  0.92190000   1.97503879
  0.92190000   2.51287719
  0.92190000   1.97503719
  0.92190000   2.51286534
  0.92190000   1.97503570
  0.92190000   2.51285499
  0.92190000   1.97503434
  0.92190000   2.51284586
  0.92190000   1.97503307
  0.92190000   2.51283777
  0.92190000   1.97503190
  0.92190000   2.51283054
  0.92190000   1.97503082
  0.92190000   2.51282406
  0.92190000   1.97502981
  0.92190000   2.51281820
  0.92190000   1.97502887
  0.92190000   2.51281289
  0.92190000   1.97502800
  0.92190000   2.51280804
  0.92190000   1.97502719
  0.92190000   2.51280361
  0.92200000   2.51374253
  0.92200000   1.97372239
  0.92200000   2.51372780
  0.92200000   1.97372278
  0.92200000   2.51371620
  0.92200000   1.97372073
  0.92200000   2.51370575
  0.92200000   1.97371950
  0.92200000   2.51369663
  0.92200000   1.97371819
  0.92200000   2.51368853
  0.92200000   1.97371702
  0.92200000   2.51368131
  0.92200000   1.97371592
  0.92200000   2.51367482
  0.92200000   1.97371491
  0.92200000   2.51366896
  0.92200000   1.97371396
  0.92200000   2.51366365
  0.92200000   1.97371308
  0.92200000   2.51365881
  0.92200000   1.97371226
  0.92200000   2.51365438
  0.92210000   2.51458994
  0.92210000   1.97241090
  0.92210000   2.51457447
  0.92210000   1.97241262
  0.92210000   2.51456305
  0.92210000   1.97241017
  0.92210000   2.51455253
  0.92210000   1.97240904
  0.92210000   2.51454342
  0.92210000   1.97240768
  0.92210000   2.51453531
  0.92210000   1.97240651
  0.92210000   2.51452809
  0.92210000   1.97240540
  0.92210000   2.51452160
  0.92210000   1.97240438
  0.92210000   2.51451575
  0.92210000   1.97240343
  0.92210000   2.51451044
  0.92210000   1.97240254
  0.92210000   2.51450561
  0.92210000   1.97240172
  0.92210000   2.51450118
  0.92220000   2.51543305
  0.92220000   1.97110441
  0.92220000   2.51541730
  0.92220000   1.97110660
  0.92220000   2.51540594
  0.92220000   1.97110397
  0.92220000   2.51539538
  0.92220000   1.97110288
  0.92220000   2.51538629
  0.92220000   1.97110149
  0.92220000   2.51537817
  0.92220000   1.97110032
  0.92220000   2.51537095
  0.92220000   1.97109920
  0.92220000   2.51536447
  0.92220000   1.97109817
  0.92220000   2.51535862
  0.92220000   1.97109721
  0.92220000   2.51535331
  0.92220000   1.97109632
  0.92220000   2.51534848
  0.92220000   1.97109549
  0.92220000   2.51534406
  0.92230000   2.51627192
  0.92230000   1.96980286
  0.92230000   2.51625633
  0.92230000   1.96980466
  0.92230000   2.51624493
  0.92230000   1.96980209
  0.92230000   2.51623436
  0.92230000   1.96980098
  0.92230000   2.51622527
  0.92230000   1.96979958
  0.92230000   2.51621715
  0.92230000   1.96979840
  0.92230000   2.51620993
  0.92230000   1.96979727
  0.92230000   2.51620345
  0.92230000   1.96979624
  0.92230000   2.51619761
  0.92230000   1.96979527
  0.92230000   2.51619231
  0.92230000   1.96979437
  0.92230000   2.51618748
  0.92230000   1.96979354
  0.92230000   2.51618306
  0.92240000   2.51710666
  0.92240000   1.96850612
  0.92240000   2.51709162
  0.92240000   1.96850677
  0.92240000   2.51708004
  0.92240000   1.96850450
  0.92240000   2.51706952
  0.92240000   1.96850329
  0.92240000   2.51706041
  0.92240000   1.96850191
  0.92240000   2.51705231
  0.92240000   1.96850071
  0.92240000   2.51704509
  0.92240000   1.96849957
  0.92240000   2.51703862
  0.92240000   1.96849853
  0.92240000   2.51703277
  0.92240000   1.96849756
  0.92240000   2.51702748
  0.92240000   1.96849665
  0.92240000   2.51702265
  0.92240000   1.96849581
  0.92240000   2.51701824
  0.92250000   2.51793738
  0.92250000   1.96721397
  0.92250000   2.51792320
  0.92250000   1.96721291
  0.92250000   2.51791135
  0.92250000   1.96721115
  0.92250000   2.51790091
  0.92250000   1.96720977
  0.92250000   2.51789178
  0.92250000   1.96720842
  0.92250000   2.51788368
  0.92250000   1.96720720
  0.92250000   2.51787647
  0.92250000   1.96720606
  0.92250000   2.51787000
  0.92250000   1.96720501
  0.92250000   2.51786416
  0.92250000   1.96720403
  0.92250000   2.51785887
  0.92250000   1.96720312
  0.92250000   2.51785405
  0.92250000   1.96720227
  0.92250000   2.51784964
  0.92260000   2.51876425
  0.92260000   1.96592619
  0.92260000   2.51875109
  0.92260000   1.96592309
  0.92260000   2.51873891
  0.92260000   1.96592196
  0.92260000   2.51872857
  0.92260000   1.96592036
  0.92260000   2.51871941
  0.92260000   1.96591907
  0.92260000   2.51871133
  0.92260000   1.96591781
  0.92260000   2.51870411
  0.92260000   1.96591667
  0.92260000   2.51869765
  0.92260000   1.96591561
  0.92260000   2.51869182
  0.92260000   1.96591463
  0.92260000   2.51868653
  0.92260000   1.96591372
  0.92260000   2.51868172
  0.92260000   1.96591286
  0.92260000   2.51867731
  0.92270000   2.51958739
  0.92270000   1.96464256
  0.92270000   2.51957531
  0.92270000   1.96463732
  0.92270000   2.51956275
  0.92270000   1.96463689
  0.92270000   2.51955255
  0.92270000   1.96463503
  0.92270000   2.51954335
  0.92270000   1.96463381
  0.92270000   2.51953528
  0.92270000   1.96463252
  0.92270000   2.51952807
  0.92270000   1.96463138
  0.92270000   2.51952162
  0.92270000   1.96463031
  0.92270000   2.51951579
  0.92270000   1.96462932
  0.92270000   2.51951051
  0.92270000   1.96462840
  0.92270000   2.51950570
  0.92270000   1.96462755
  0.92270000   2.51950131
  0.92280000   2.52040695
  0.92280000   1.96336285
  0.92280000   2.52039587
  0.92280000   1.96335560
  0.92280000   2.52038296
  0.92280000   1.96335586
  0.92280000   2.52037288
  0.92280000   1.96335375
  0.92280000   2.52036364
  0.92280000   1.96335260
  0.92280000   2.52035560
  0.92280000   1.96335127
  0.92280000   2.52034839
  0.92280000   1.96335014
  0.92280000   2.52034195
  0.92280000   1.96334906
  0.92280000   2.52033613
  0.92280000   1.96334807
  0.92280000   2.52033085
  0.92280000   1.96334714
  0.92280000   2.52032605
  0.92280000   1.96334628
  0.92280000   2.52032165
  0.92290000   2.52122304
  0.92290000   1.96208686
  0.92290000   2.52121280
  0.92290000   1.96207796
  0.92290000   2.52119957
  0.92290000   1.96207883
  0.92290000   2.52118962
  0.92290000   1.96207646
  0.92290000   2.52118034
  0.92290000   1.96207540
  0.92290000   2.52117232
  0.92290000   1.96207403
  0.92290000   2.52116511
  0.92290000   1.96207290
  0.92290000   2.52115868
  0.92290000   1.96207180
  0.92290000   2.52115286
  0.92290000   1.96207081
  0.92290000   2.52114759
  0.92290000   1.96206988
  0.92290000   2.52114279
  0.92290000   1.96206901
  0.92290000   2.52113840
  0.92300000   2.52203579
  0.92300000   1.96081441
  0.92300000   2.52202610
  0.92300000   1.96080440
  0.92300000   2.52201265
  0.92300000   1.96080571
  0.92300000   2.52200279
  0.92300000   1.96080316
  0.92300000   2.52199348
  0.92300000   1.96080215
  0.92300000   2.52198549
  0.92300000   1.96080074
  0.92300000   2.52197828
  0.92300000   1.96079962
  0.92300000   2.52197185
  0.92300000   1.96079851
  0.92300000   2.52196604
  0.92300000   1.96079751
  0.92300000   2.52196078
  0.92300000   1.96079658
  0.92300000   2.52195599
  0.92300000   1.96079571
  0.92300000   2.52195161
  0.92310000   2.52284530
  0.92310000   1.95954535
  0.92310000   2.52283579
  0.92310000   1.95953495
  0.92310000   2.52282224
  0.92310000   1.95953646
  0.92310000   2.52281245
  0.92310000   1.95953379
  0.92310000   2.52280312
  0.92310000   1.95953282
  0.92310000   2.52279514
  0.92310000   1.95953138
  0.92310000   2.52278794
  0.92310000   1.95953026
  0.92310000   2.52278152
  0.92310000   1.95952914
  0.92310000   2.52277571
  0.92310000   1.95952814
  0.92310000   2.52277046
  0.92310000   1.95952720
  0.92310000   2.52276567
  0.92310000   1.95952632
  0.92310000   2.52276129
  0.92320000   2.52365164
  0.92320000   1.95827955
  0.92320000   2.52364190
  0.92320000   1.95826961
  0.92320000   2.52362841
  0.92320000   1.95827099
  0.92320000   2.52361861
  0.92320000   1.95826833
  0.92320000   2.52360929
  0.92320000   1.95826735
  0.92320000   2.52360132
  0.92320000   1.95826590
  0.92320000   2.52359413
  0.92320000   1.95826477
  0.92320000   2.52358771
  0.92320000   1.95826365
  0.92320000   2.52358191
  0.92320000   1.95826264
  0.92320000   2.52357667
  0.92320000   1.95826170
  0.92320000   2.52357188
  0.92320000   1.95826082
  0.92320000   2.52356751
  0.92330000   2.52445490
  0.92330000   1.95701691
  0.92330000   2.52444443
  0.92330000   1.95700837
  0.92330000   2.52443119
  0.92330000   1.95700926
  0.92330000   2.52442133
  0.92330000   1.95700674
  0.92330000   2.52441204
  0.92330000   1.95700571
  0.92330000   2.52440407
  0.92330000   1.95700427
  0.92330000   2.52439688
  0.92330000   1.95700313
  0.92330000   2.52439048
  0.92330000   1.95700200
  0.92330000   2.52438469
  0.92330000   1.95700099
  0.92330000   2.52437944
  0.92330000   1.95700004
  0.92330000   2.52437467
  0.92330000   1.95699916
  0.92330000   2.52437030
  0.92340000   2.52525511
  0.92340000   1.95575737
  0.92340000   2.52524343
  0.92340000   1.95575122
  0.92340000   2.52523065
  0.92340000   1.95575122
  0.92340000   2.52522062
  0.92340000   1.95574901
  0.92340000   2.52521141
  0.92340000   1.95574785
  0.92340000   2.52520343
  0.92340000   1.95574644
  0.92340000   2.52519625
  0.92340000   1.95574528
  0.92340000   2.52518985
  0.92340000   1.95574415
  0.92340000   2.52518407
  0.92340000   1.95574313
  0.92340000   2.52517883
  0.92340000   1.95574217
  0.92340000   2.52517406
  0.92340000   1.95574129
  0.92340000   2.52516970
  0.92350000   2.52605231
  0.92350000   1.95450092
  0.92350000   2.52603892
  0.92350000   1.95449813
  0.92350000   2.52602682
  0.92350000   1.95449680
  0.92350000   2.52601654
  0.92350000   1.95449509
  0.92350000   2.52600744
  0.92350000   1.95449372
  0.92350000   2.52599943
  0.92350000   1.95449239
  0.92350000   2.52599228
  0.92350000   1.95449119
  0.92350000   2.52598588
  0.92350000   1.95449007
  0.92350000   2.52598010
  0.92350000   1.95448904
  0.92350000   2.52597487
  0.92350000   1.95448808
  0.92350000   2.52597011
  0.92350000   1.95448719
  0.92350000   2.52596576
  0.92360000   2.52684651
  0.92360000   1.95324756
  0.92360000   2.52683096
  0.92360000   1.95324906
  0.92360000   2.52681975
  0.92360000   1.95324597
  0.92360000   2.52680912
  0.92360000   1.95324496
  0.92360000   2.52680017
  0.92360000   1.95324330
  0.92360000   2.52679211
  0.92360000   1.95324207
  0.92360000   2.52678499
  0.92360000   1.95324081
  0.92360000   2.52677859
  0.92360000   1.95323971
  0.92360000   2.52677283
  0.92360000   1.95323866
  0.92360000   2.52676760
  0.92360000   1.95323770
  0.92360000   2.52676285
  0.92360000   1.95323681
  0.92360000   2.52675850
  0.92370000   2.52763772
  0.92370000   1.95199733
  0.92370000   2.52761957
  0.92370000   1.95200395
  0.92370000   2.52760947
  0.92370000   1.95199868
  0.92370000   2.52759839
  0.92370000   1.95199858
  0.92370000   2.52758965
  0.92370000   1.95199652
  0.92370000   2.52758151
  0.92370000   1.95199545
  0.92370000   2.52757444
  0.92370000   1.95199412
  0.92370000   2.52756803
  0.92370000   1.95199304
  0.92370000   2.52756228
  0.92370000   1.95199198
  0.92370000   2.52755706
  0.92370000   1.95199102
  0.92370000   2.52755231
  0.92370000   1.95199012
  0.92370000   2.52754796
  0.92380000   2.52842591
  0.92380000   1.95075031
  0.92380000   2.52840482
  0.92380000   1.95076275
  0.92380000   2.52839602
  0.92380000   1.95075492
  0.92380000   2.52838439
  0.92380000   1.95075592
  0.92380000   2.52837590
  0.92380000   1.95075336
  0.92380000   2.52836767
  0.92380000   1.95075250
  0.92380000   2.52836065
  0.92380000   1.95075107
  0.92380000   2.52835423
  0.92380000   1.95075002
  0.92380000   2.52834849
  0.92380000   1.95074894
  0.92380000   2.52834327
  0.92380000   1.95074798
  0.92380000   2.52833853
  0.92380000   1.95074708
  0.92380000   2.52833420
  0.92390000   2.52921106
  0.92390000   1.94950658
  0.92390000   2.52918677
  0.92390000   1.94952536
  0.92390000   2.52917943
  0.92390000   1.94951464
  0.92390000   2.52916716
  0.92390000   1.94951693
  0.92390000   2.52915897
  0.92390000   1.94951379
  0.92390000   2.52915062
  0.92390000   1.94951317
  0.92390000   2.52914366
  0.92390000   1.94951162
  0.92390000   2.52913722
  0.92390000   1.94951062
  0.92390000   2.52913151
  0.92390000   1.94950951
  0.92390000   2.52912629
  0.92390000   1.94950856
  0.92390000   2.52912156
  0.92390000   1.94950765
  0.92390000   2.52911723
  0.92400000   2.52999311
  0.92400000   1.94826628
  0.92400000   2.52996549
  0.92400000   1.94829169
  0.92400000   2.52995972
  0.92400000   1.94827786
  0.92400000   2.52994673
  0.92400000   1.94828158
  0.92400000   2.52993890
  0.92400000   1.94827776
  0.92400000   2.52993039
  0.92400000   1.94827745
  0.92400000   2.52992352
  0.92400000   1.94827575
  0.92400000   2.52991706
  0.92400000   1.94827481
  0.92400000   2.52991137
  0.92400000   1.94827366
  0.92400000   2.52990615
  0.92400000   1.94827272
  0.92400000   2.52990142
  0.92400000   1.94827180
  0.92400000   2.52989710
  0.92410000   2.53077202
  0.92410000   1.94702956
  0.92410000   2.53074105
  0.92410000   1.94706163
  0.92410000   2.53073692
  0.92410000   1.94704455
  0.92410000   2.53072316
  0.92410000   1.94704982
  0.92410000   2.53071570
  0.92410000   1.94704524
  0.92410000   2.53070703
  0.92410000   1.94704528
  0.92410000   2.53070026
  0.92410000   1.94704341
  0.92410000   2.53069376
  0.92410000   1.94704254
  0.92410000   2.53068810
  0.92410000   1.94704136
  0.92410000   2.53068288
  0.92410000   1.94704043
  0.92410000   2.53067816
  0.92410000   1.94703949
  0.92410000   2.53067384
  0.92420000   2.53154769
  0.92420000   1.94579660
  0.92420000   2.53151353
  0.92420000   1.94583503
  0.92420000   2.53151103
  0.92420000   1.94581474
  0.92420000   2.53149648
  0.92420000   1.94582159
  0.92420000   2.53148943
  0.92420000   1.94581622
  0.92420000   2.53148058
  0.92420000   1.94581664
  0.92420000   2.53147390
  0.92420000   1.94581457
  0.92420000   2.53146737
  0.92420000   1.94581379
  0.92420000   2.53146173
  0.92420000   1.94581256
  0.92420000   2.53145651
  0.92420000   1.94581165
  0.92420000   2.53145181
  0.92420000   1.94581069
  0.92420000   2.53144748
  0.92430000   2.53232005
  0.92430000   1.94456762
  0.92430000   2.53228305
  0.92430000   1.94461173
  0.92430000   2.53228205
  0.92430000   1.94458845
  0.92430000   2.53226674
  0.92430000   1.94459683
  0.92430000   2.53226010
  0.92430000   1.94459067
  0.92430000   2.53225105
  0.92430000   1.94459148
  0.92430000   2.53224449
  0.92430000   1.94458920
  0.92430000   2.53223791
  0.92430000   1.94458852
  0.92430000   2.53223231
  0.92430000   1.94458723
  0.92430000   2.53222708
  0.92430000   1.94458634
  0.92430000   2.53222239
  0.92430000   1.94458538
  0.92430000   2.53221807
  0.92440000   2.53308899
  0.92440000   1.94334287
  0.92440000   2.53304969
  0.92440000   1.94339158
  0.92440000   2.53305000
  0.92440000   1.94336572
  0.92440000   2.53303399
  0.92440000   1.94337548
  0.92440000   2.53302774
  0.92440000   1.94336857
  0.92440000   2.53301850
  0.92440000   1.94336976
  0.92440000   2.53301205
  0.92440000   1.94336728
  0.92440000   2.53300543
  0.92440000   1.94336669
  0.92440000   2.53299986
  0.92440000   1.94336535
  0.92440000   2.53299463
  0.92440000   1.94336449
  0.92440000   2.53298995
  0.92440000   1.94336350
  0.92440000   2.53298563
  0.92450000   2.53385438
  0.92450000   1.94212260
  0.92450000   2.53381358
  0.92450000   1.94217436
  0.92450000   2.53381484
  0.92450000   1.94214659
  0.92450000   2.53379830
  0.92450000   1.94215746
  0.92450000   2.53379237
  0.92450000   1.94214991
  0.92450000   2.53378297
  0.92450000   1.94215145
  0.92450000   2.53377662
  0.92450000   1.94214877
  0.92450000   2.53376996
  0.92450000   1.94214828
  0.92450000   2.53376442
  0.92450000   1.94214688
  0.92450000   2.53375918
  0.92450000   1.94214604
  0.92450000   2.53375452
  0.92450000   1.94214504
  0.92450000   2.53375020
  0.92460000   2.53461612
  0.92460000   1.94090711
  0.92460000   2.53457484
  0.92460000   1.94095987
  0.92460000   2.53457658
  0.92460000   1.94093115
  0.92460000   2.53455971
  0.92460000   1.94094269
  0.92460000   2.53455401
  0.92460000   1.94093469
  0.92460000   2.53454449
  0.92460000   1.94093648
  0.92460000   2.53453823
  0.92460000   1.94093365
  0.92460000   2.53453152
  0.92460000   1.94093324
  0.92460000   2.53452602
  0.92460000   1.94093179
  0.92460000   2.53452077
  0.92460000   1.94093097
  0.92460000   2.53451612
  0.92460000   1.94092995
  0.92460000   2.53451181
  0.92470000   2.53537406
  0.92470000   1.93969668
  0.92470000   2.53533360
  0.92470000   1.93974787
  0.92470000   2.53533517
  0.92470000   1.93971948
  0.92470000   2.53531830
  0.92470000   1.93973106
  0.92470000   2.53531267
  0.92470000   1.93972292
  0.92470000   2.53530310
  0.92470000   1.93972483
  0.92470000   2.53529689
  0.92470000   1.93972190
  0.92470000   2.53529017
  0.92470000   1.93972155
  0.92470000   2.53528469
  0.92470000   1.93972005
  0.92470000   2.53527944
  0.92470000   1.93971925
  0.92470000   2.53527480
  0.92470000   1.93971822
  0.92470000   2.53527049
  0.92480000   2.53612808
  0.92480000   1.93849161
  0.92480000   2.53608999
  0.92480000   1.93853813
  0.92480000   2.53609060
  0.92480000   1.93851166
  0.92480000   2.53607413
  0.92480000   1.93852247
  0.92480000   2.53606837
  0.92480000   1.93851461
  0.92480000   2.53605885
  0.92480000   1.93851641
  0.92480000   2.53605264
  0.92480000   1.93851351
  0.92480000   2.53604593
  0.92480000   1.93851315
  0.92480000   2.53604046
  0.92480000   1.93851164
  0.92480000   2.53603521
  0.92480000   1.93851085
  0.92480000   2.53603058
  0.92480000   1.93850981
  0.92480000   2.53602628
  0.92490000   2.53687805
  0.92490000   1.93729219
  0.92490000   2.53684416
  0.92490000   1.93733041
  0.92490000   2.53684282
  0.92490000   1.93730780
  0.92490000   2.53682727
  0.92490000   1.93731681
  0.92490000   2.53682110
  0.92490000   1.93730976
  0.92490000   2.53681179
  0.92490000   1.93731119
  0.92490000   2.53680550
  0.92490000   1.93730845
  0.92490000   2.53679883
  0.92490000   1.93730801
  0.92490000   2.53679336
  0.92490000   1.93730653
  0.92490000   2.53678812
  0.92490000   1.93730572
  0.92490000   2.53678350
  0.92490000   1.93730468
  0.92490000   2.53677920
  0.92500000   2.53762385
  0.92500000   1.93609869
  0.92500000   2.53759623
  0.92500000   1.93612446
  0.92500000   2.53759180
  0.92500000   1.93610803
  0.92500000   2.53757780
  0.92500000   1.93611395
  0.92500000   2.53757088
  0.92500000   1.93610842
  0.92500000   2.53756195
  0.92500000   1.93610910
  0.92500000   2.53755549
  0.92500000   1.93610671
  0.92500000   2.53754892
  0.92500000   1.93610610
  0.92500000   2.53754341
  0.92500000   1.93610470
  0.92500000   2.53753820
  0.92500000   1.93610384
  0.92500000   2.53753357
  0.92500000   1.93610282
  0.92500000   2.53752928
  0.92510000   2.53836538
  0.92510000   1.93491137
  0.92510000   2.53834634
  0.92510000   1.93492003
  0.92510000   2.53833748
  0.92510000   1.93491245
  0.92510000   2.53832580
  0.92510000   1.93491378
  0.92510000   2.53831770
  0.92510000   1.93491062
  0.92510000   2.53830940
  0.92510000   1.93491006
  0.92510000   2.53830262
  0.92510000   1.93490831
  0.92510000   2.53829623
  0.92510000   1.93490736
  0.92510000   2.53829064
  0.92510000   1.93490613
  0.92510000   2.53828548
  0.92510000   1.93490518
  0.92510000   2.53828084
  0.92510000   1.93490420
  0.92510000   2.53827657
  0.92520000   2.53910254
  0.92520000   1.93373044
  0.92520000   2.53909463
  0.92520000   1.93371690
  0.92520000   2.53907983
  0.92520000   1.93372120
  0.92520000   2.53907135
  0.92520000   1.93371616
  0.92520000   2.53906155
  0.92520000   1.93371640
  0.92520000   2.53905418
  0.92520000   1.93371400
  0.92520000   2.53904692
  0.92520000   1.93371323
  0.92520000   2.53904080
  0.92520000   1.93371175
  0.92520000   2.53903507
  0.92520000   1.93371080
  0.92520000   2.53903000
  0.92520000   1.93370970
  0.92520000   2.53902532
  0.92520000   1.93370879
  0.92520000   2.53902108
  0.92530000   2.53983525
  0.92530000   1.93255610
  0.92530000   2.53984122
  0.92530000   1.93251484
  0.92530000   2.53981880
  0.92530000   1.93253439
  0.92530000   2.53981453
  0.92530000   1.93252093
  0.92530000   2.53980243
  0.92530000   1.93252580
  0.92530000   2.53979634
  0.92530000   1.93252085
  0.92530000   2.53978839
  0.92530000   1.93252147
  0.92530000   2.53978266
  0.92530000   1.93251922
  0.92530000   2.53977674
  0.92530000   1.93251869
  0.92530000   2.53977179
  0.92530000   1.93251735
  0.92530000   2.53976705
  0.92530000   1.93251657
  0.92530000   2.53976285
  0.92540000   2.54056347
  0.92540000   1.93138848
  0.92540000   2.54058621
  0.92540000   1.93131366
  0.92540000   2.54055434
  0.92540000   1.93135215
  0.92540000   2.54055543
  0.92540000   1.93132798
  0.92540000   2.54054033
  0.92540000   1.93133888
  0.92540000   2.54053595
  0.92540000   1.93133052
  0.92540000   2.54052705
  0.92540000   1.93133305
  0.92540000   2.54052187
  0.92540000   1.93132971
  0.92540000   2.54051565
  0.92540000   1.93132979
  0.92540000   2.54051088
  0.92540000   1.93132811
  0.92540000   2.54050605
  0.92540000   1.93132752
  0.92540000   2.54050190
  0.92550000   2.54128716
  0.92550000   1.93022769
  0.92550000   2.54132972
  0.92550000   1.93011315
  0.92550000   2.54128642
  0.92550000   1.93017458
  0.92550000   2.54129414
  0.92550000   1.93013715
  0.92550000   2.54127523
  0.92550000   1.93015569
  0.92550000   2.54127306
  0.92550000   1.93014292
  0.92550000   2.54126291
  0.92550000   1.93014799
  0.92550000   2.54125846
  0.92550000   1.93014318
  0.92550000   2.54125182
  0.92550000   1.93014410
  0.92550000   2.54124730
  0.92550000   1.93014193
  0.92550000   2.54124234
  0.92550000   1.93014162
  0.92550000   2.54123828
  0.92560000   2.54200630
  0.92560000   1.92907379
  0.92560000   2.54207184
  0.92560000   1.92891317
  0.92560000   2.54201499
  0.92560000   1.92900181
  0.92560000   2.54203072
  0.92560000   1.92894831
  0.92560000   2.54200711
  0.92560000   1.92897630
  0.92560000   2.54200773
  0.92560000   1.92895796
  0.92560000   2.54199595
  0.92560000   1.92896629
  0.92560000   2.54199248
  0.92560000   1.92895957
  0.92560000   2.54198529
  0.92560000   1.92896160
  0.92560000   2.54198110
  0.92560000   1.92895877
  0.92560000   2.54197595
  0.92560000   1.92895884
  0.92560000   2.54197201
  0.92570000   2.54272092
  0.92570000   1.92792679
  0.92570000   2.54281264
  0.92570000   1.92771357
  0.92570000   2.54274002
  0.92570000   1.92783392
  0.92570000   2.54276528
  0.92570000   1.92776131
  0.92570000   2.54273597
  0.92570000   1.92780078
  0.92570000   2.54274002
  0.92570000   1.92777554
  0.92570000   2.54272620
  0.92570000   1.92778800
  0.92570000   2.54272396
  0.92570000   1.92777880
  0.92570000   2.54271604
  0.92570000   1.92778231
  0.92570000   2.54271230
  0.92570000   1.92777859
  0.92570000   2.54270690
  0.92570000   1.92777919
  0.92570000   2.54270312
  0.92580000   2.54343106
  0.92580000   1.92678663
  0.92580000   2.54355219
  0.92580000   1.92651427
  0.92580000   2.54346150
  0.92580000   1.92667100
  0.92580000   2.54349788
  0.92580000   1.92657602
  0.92580000   2.54346177
  0.92580000   1.92662918
  0.92580000   2.54347000
  0.92580000   1.92659557
  0.92580000   2.54345365
  0.92580000   1.92661312
  0.92580000   2.54345296
  0.92580000   1.92660082
  0.92580000   2.54344411
  0.92580000   1.92660621
  0.92580000   2.54344095
  0.92580000   1.92660134
  0.92580000   2.54343521
  0.92580000   1.92660263
  0.92580000   2.54343164
  0.92590000   2.54413678
  0.92590000   1.92565320
  0.92590000   2.54429053
  0.92590000   1.92531520
  0.92590000   2.54417940
  0.92590000   1.92551310
  0.92590000   2.54422860
  0.92590000   1.92539234
  0.92590000   2.54418451
  0.92590000   1.92546157
  0.92590000   2.54419773
  0.92590000   1.92541794
  0.92590000   2.54417830
  0.92590000   1.92544171
  0.92590000   2.54417953
  0.92590000   1.92542555
  0.92590000   2.54416951
  0.92590000   1.92543331
  0.92590000   2.54416707
  0.92590000   1.92542698
  0.92590000   2.54416089
  0.92590000   1.92542917
  0.92590000   2.54415761
  0.92600000   2.54483822
  0.92600000   1.92452631
  0.92600000   2.54502766
  0.92600000   1.92411636
  0.92600000   2.54489372
  0.92600000   1.92436026
  0.92600000   2.54495750
  0.92600000   1.92421013
  0.92600000   2.54490417
  0.92600000   1.92429800
  0.92600000   2.54492326
  0.92600000   1.92424257
  0.92600000   2.54490014
  0.92600000   1.92427378
  0.92600000   2.54490371
  0.92600000   1.92425292
  0.92600000   2.54489223
  0.92600000   1.92426364
  0.92600000   2.54489072
  0.92600000   1.92425545
  0.92600000   2.54488397
  0.92600000   1.92425879
  0.92600000   2.54488105
  0.92610000   2.54553550
  0.92610000   1.92340570
  0.92610000   2.54576359
  0.92610000   1.92291778
  0.92610000   2.54560448
  0.92610000   1.92321247
  0.92610000   2.54568464
  0.92610000   1.92302933
  0.92610000   2.54562075
  0.92610000   1.92313853
  0.92610000   2.54564666
  0.92610000   1.92306934
  0.92610000   2.54561917
  0.92610000   1.92310938
  0.92610000   2.54562555
  0.92610000   1.92308287
  0.92610000   2.54561229
  0.92610000   1.92309718
  0.92610000   2.54561193
  0.92610000   1.92308670
  0.92610000   2.54560446
  0.92610000   1.92309150
  0.92610000   2.54560201
  0.92620000   2.54622883
  0.92620000   1.92229098
  0.92620000   2.54649826
  0.92620000   1.92171958
  0.92620000   2.54631172
  0.92620000   1.92206970
  0.92620000   2.54641006
  0.92620000   1.92184988
  0.92620000   2.54633423
  0.92620000   1.92198318
  0.92620000   2.54636798
  0.92620000   1.92189819
  0.92620000   2.54633539
  0.92620000   1.92194853
  0.92620000   2.54634511
  0.92620000   1.92191531
  0.92620000   2.54632970
  0.92620000   1.92193397
  0.92620000   2.54633074
  0.92620000   1.92192068
  0.92620000   2.54632238
  0.92620000   1.92192729
  0.92620000   2.54632051
  0.92630000   2.54691848
  0.92630000   1.92118169
  0.92630000   2.54723158
  0.92630000   1.92052197
  0.92630000   2.54701551
  0.92630000   1.92093182
  0.92630000   2.54713378
  0.92630000   1.92067175
  0.92630000   2.54704463
  0.92630000   1.92083197
  0.92630000   2.54708727
  0.92630000   1.92072904
  0.92630000   2.54704881
  0.92630000   1.92079127
  0.92630000   2.54706242
  0.92630000   1.92075018
  0.92630000   2.54704446
  0.92630000   1.92077402
  0.92630000   2.54704719
  0.92630000   1.92075732
  0.92630000   2.54703773
  0.92630000   1.92076616
  0.92630000   2.54703659
  0.92640000   2.54760475
  0.92640000   1.92007720
  0.92640000   2.54796342
  0.92640000   1.91932523
  0.92640000   2.54771595
  0.92640000   1.91979868
  0.92640000   2.54785579
  0.92640000   1.91949497
  0.92640000   2.54775198
  0.92640000   1.91968487
  0.92640000   2.54780458
  0.92640000   1.91956182
  0.92640000   2.54775941
  0.92640000   1.91963761
  0.92640000   2.54777754
  0.92640000   1.91958741
  0.92640000   2.54775657
  0.92640000   1.91961734
  0.92640000   2.54776132
  0.92640000   1.91959658
  0.92640000   2.54775053
  0.92640000   1.91960811
  0.92640000   2.54775028
  0.92650000   2.54828805
  0.92650000   1.91897674
  0.92650000   2.54869358
  0.92650000   1.91812979
  0.92650000   2.54841318
  0.92650000   1.91867000
  0.92650000   2.54857607
  0.92650000   1.91831962
  0.92650000   2.54845631
  0.92650000   1.91854184
  0.92650000   2.54851992
  0.92650000   1.91839651
  0.92650000   2.54846723
  0.92650000   1.91848755
  0.92650000   2.54849051
  0.92650000   1.91842695
  0.92650000   2.54846605
  0.92650000   1.91846393
  0.92650000   2.54847317
  0.92650000   1.91843839
  0.92650000   2.54846079
  0.92650000   1.91845315
  0.92650000   2.54846162
  0.92660000   2.54896886
  0.92660000   1.91787936
  0.92660000   2.54942180
  0.92660000   1.91693620
  0.92660000   2.54910739
  0.92660000   1.91754543
  0.92660000   2.54929455
  0.92660000   1.91714587
  0.92660000   2.54915769
  0.92660000   1.91740275
  0.92660000   2.54923331
  0.92660000   1.91723313
  0.92660000   2.54917228
  0.92660000   1.91734107
  0.92660000   2.54920135
  0.92660000   1.91726875
  0.92660000   2.54917291
  0.92660000   1.91731381
  0.92660000   2.54918277
  0.92660000   1.91728272
  0.92660000   2.54916853
  0.92660000   1.91730127
  0.92660000   2.54917064
  0.92670000   1.91521424
  0.92670000   2.54964776
  0.92670000   1.91678392
  0.92670000   2.55014775
  0.92670000   1.91574516
  0.92670000   2.54979884
  0.92670000   1.91642448
  0.92670000   2.55001111
  0.92670000   1.91597398
  0.92670000   2.54985623
  0.92670000   1.91626744
  0.92670000   2.54994472
  0.92670000   1.91607171
  0.92670000   2.54987459
  0.92670000   1.91619812
  0.92670000   2.54991009
  0.92670000   1.91611280
  0.92670000   2.54987716
  0.92670000   1.91616696
  0.92670000   2.54989017
  0.92670000   1.91612951
  0.92670000   2.54987375
  0.92670000   1.91615247
  0.92670000   2.54987738
  0.92680000   1.91399879
  0.92680000   2.55032544
  0.92680000   1.91568905
  0.92680000   2.55087099
  0.92680000   1.91455756
  0.92680000   2.55048785
  0.92680000   1.91530653
  0.92680000   2.55072558
  0.92680000   1.91480430
  0.92680000   2.55055207
  0.92680000   1.91513563
  0.92680000   2.55065413
  0.92680000   1.91491238
  0.92680000   2.55057423
  0.92680000   1.91505861
  0.92680000   2.55061673
  0.92680000   1.91495909
  0.92680000   2.55057883
  0.92680000   1.91502335
  0.92680000   2.55059538
  0.92680000   1.91497875
  0.92680000   2.55057647
  0.92680000   1.91500675
  0.92680000   2.55058185
  0.92690000   1.91279326
  0.92690000   2.55100270
  0.92690000   1.91459315
  0.92690000   2.55159099
  0.92690000   1.91337449
  0.92690000   2.55117483
  0.92690000   1.91419078
  0.92690000   2.55143773
  0.92690000   1.91363732
  0.92690000   2.55124538
  0.92690000   1.91400699
  0.92690000   2.55136143
  0.92690000   1.91375532
  0.92690000   2.55127129
  0.92690000   1.91392239
  0.92690000   2.55132127
  0.92690000   1.91380769
  0.92690000   2.55127797
  0.92690000   1.91388293
  0.92690000   2.55129841
  0.92690000   1.91383042
  0.92690000   2.55127673
  0.92690000   1.91386408
  0.92690000   2.55128411
  0.92700000   1.91160004
  0.92700000   2.55168046
  0.92700000   1.91349434
  0.92700000   2.55230714
  0.92700000   1.91219726
  0.92700000   2.55186026
  0.92700000   1.91307625
  0.92700000   2.55214726
  0.92700000   1.91247369
  0.92700000   2.55193643
  0.92700000   1.91288103
  0.92700000   2.55206651
  0.92700000   1.91260081
  0.92700000   2.55196587
  0.92700000   1.91278924
  0.92700000   2.55202367
  0.92700000   1.91265868
  0.92700000   2.55197463
  0.92700000   1.91274559
  0.92700000   2.55199928
  0.92700000   1.91268454
  0.92700000   2.55197454
  0.92700000   1.91272441
  0.92700000   2.55198414
  0.92710000   1.91042182
  0.92710000   2.55235980
  0.92710000   1.91239050
  0.92710000   2.55301867
  0.92710000   1.91102743
  0.92710000   2.55254475
  0.92710000   1.91196176
  0.92710000   2.55285378
  0.92710000   1.91131423
  0.92710000   2.55262552
  0.92710000   1.91175714
  0.92710000   2.55276919
  0.92710000   1.91144924
  0.92710000   2.55265815
  0.92710000   1.91165887
  0.92710000   2.55272385
  0.92710000   1.91151223
  0.92710000   2.55266889
  0.92710000   1.91161120
  0.92710000   2.55269797
  0.92710000   1.91154117
  0.92710000   2.55266997
  0.92710000   1.91158768
  0.92710000   2.55268198
  0.92720000   1.90926154
  0.92720000   2.55304192
  0.92720000   1.91127920
  0.92720000   2.55372470
  0.92720000   1.90986680
  0.92720000   2.55322901
  0.92720000   1.91084588
  0.92720000   2.55355680
  0.92720000   1.91015994
  0.92720000   2.55331305
  0.92720000   1.91063453
  0.92720000   2.55346923
  0.92720000   1.91030113
  0.92720000   2.55334833
  0.92720000   1.91053087
  0.92720000   2.55342171
  0.92720000   1.91036859
  0.92720000   2.55336086
  0.92720000   1.91047957
  0.92720000   2.55339444
  0.92720000   1.91040039
  0.92720000   2.55336305
  0.92720000   1.91045380
  0.92720000   2.55337761
  0.92730000   1.90812245
  0.92730000   2.55372814
  0.92730000   1.91015773
  0.92730000   2.55442422
  0.92730000   1.90871747
  0.92730000   2.55391386
  0.92730000   1.90972695
  0.92730000   2.55425573
  0.92730000   1.90901205
  0.92730000   2.55399951
  0.92730000   1.90951226
  0.92730000   2.55416629
  0.92730000   1.90915715
  0.92730000   2.55403669
  0.92730000   1.90940470
  0.92730000   2.55411709
  0.92730000   1.90922811
  0.92730000   2.55405071
  0.92730000   1.90935039
  0.92730000   2.55408861
  0.92730000   1.90926239
  0.92730000   2.55405389
  0.92730000   1.90932261
  0.92730000   2.55407102
  0.92740000   1.90700808
  0.92740000   2.55441995
  0.92740000   1.90902309
  0.92740000   2.55511609
  0.92740000   1.90758180
  0.92740000   2.55460027
  0.92740000   1.90860304
  0.92740000   2.55494986
  0.92740000   1.90787203
  0.92740000   2.55468547
  0.92740000   1.90838914
  0.92740000   2.55485998
  0.92740000   1.90801815
  0.92740000   2.55472357
  0.92740000   1.90827970
  0.92740000   2.55480977
  0.92740000   1.90809123
  0.92740000   2.55473860
  0.92740000   1.90822330
  0.92740000   2.55478040
  0.92740000   1.90812739
  0.92740000   2.55474260
  0.92740000   1.90819390
  0.92740000   2.55476215
  0.92750000   1.90592218
  0.92750000   2.55511894
  0.92750000   1.90787202
  0.92750000   2.55579902
  0.92750000   1.90646245
  0.92750000   2.55528933
  0.92750000   1.90747192
  0.92750000   2.55563836
  0.92750000   1.90674161
  0.92750000   2.55537165
  0.92750000   1.90726378
  0.92750000   2.55554980
  0.92750000   1.90688519
  0.92750000   2.55540939
  0.92750000   1.90715502
  0.92750000   2.55549947
  0.92750000   1.90695858
  0.92750000   2.55542482
  0.92750000   1.90709781
  0.92750000   2.55546963
  0.92750000   1.90699572
  0.92750000   2.55542931
  0.92750000   1.90706740
  0.92750000   2.55545094
  0.92760000   1.90486872
  0.92760000   2.55582686
  0.92760000   1.90670100
  0.92760000   2.55647157
  0.92760000   1.90536239
  0.92760000   2.55598227
  0.92760000   1.90633110
  0.92760000   2.55632025
  0.92760000   1.90562279
  0.92760000   2.55605885
  0.92760000   1.90613453
  0.92760000   2.55623511
  0.92760000   1.90575954
  0.92760000   2.55609468
  0.92760000   1.90602962
  0.92760000   2.55618581
  0.92760000   1.90583094
  0.92760000   2.55610968
  0.92760000   1.90597328
  0.92760000   2.55615610
  0.92760000   1.90586786
  0.92760000   2.55611424
  0.92760000   1.90594272
  0.92760000   2.55613727
  0.92770000   1.90385188
  0.92770000   2.55654553
  0.92770000   1.90550627
  0.92770000   2.55713218
  0.92770000   1.90428484
  0.92770000   2.55668047
  0.92770000   1.90517777
  0.92770000   2.55699443
  0.92770000   1.90451786
  0.92770000   2.55674804
  0.92770000   1.90499944
  0.92770000   2.55691520
  0.92770000   1.90464273
  0.92770000   2.55678007
  0.92770000   1.90490222
  0.92770000   2.55686833
  0.92770000   1.90470926
  0.92770000   2.55679358
  0.92770000   1.90484889
  0.92770000   2.55683954
  0.92770000   1.90474437
  0.92770000   2.55679764
  0.92770000   1.90481936
  0.92770000   2.55682099
  0.92780000   1.90287593
  0.92780000   2.55727688
  0.92780000   1.90428391
  0.92780000   2.55777915
  0.92780000   1.90323331
  0.92780000   2.55738544
  0.92780000   1.90400888
  0.92780000   2.55765965
  0.92780000   1.90342943
  0.92780000   2.55744031
  0.92780000   1.90385631
  0.92780000   2.55758918
  0.92780000   1.90353657
  0.92780000   2.55746631
  0.92780000   1.90377132
  0.92780000   2.55754645
  0.92780000   1.90359475
  0.92780000   2.55747703
  0.92780000   1.90372367
  0.92780000   2.55751957
  0.92780000   1.90362603
  0.92780000   2.55747983
  0.92780000   1.90369669
  0.92780000   2.55750187
  0.92790000   1.90194525
  0.92790000   2.55802288
  0.92790000   1.90302983
  0.92790000   2.55841068
  0.92790000   1.90221156
  0.92790000   2.55809883
  0.92790000   1.90282105
  0.92790000   2.55831448
  0.92790000   1.90236038
  0.92790000   2.55813688
  0.92790000   1.90270262
  0.92790000   2.55825606
  0.92790000   1.90244315
  0.92790000   2.55815428
  0.92790000   1.90263512
  0.92790000   2.55821949
  0.92790000   1.90248885
  0.92790000   2.55816062
  0.92790000   1.90259638
  0.92790000   2.55819574
  0.92790000   1.90251379
  0.92790000   2.55816122
  0.92790000   1.90257390
  0.92790000   2.55817962
  0.92800000   1.90106424
  0.92800000   2.55878556
  0.92800000   1.90173989
  0.92800000   2.55902483
  0.92800000   1.90122355
  0.92800000   2.55882238
  0.92800000   1.90161069
  0.92800000   2.55895740
  0.92800000   1.90131394
  0.92800000   2.55883916
  0.92800000   1.90153554
  0.92800000   2.55891465
  0.92800000   1.90136488
  0.92800000   2.55884501
  0.92800000   1.90149155
  0.92800000   2.55888661
  0.92800000   1.90139327
  0.92800000   2.55884509
  0.92800000   1.90146555
  0.92800000   2.55886748
  0.92800000   1.90140885
  0.92800000   2.55884231
  0.92800000   1.90144997
  0.92800000   2.55885387
  0.92810000   1.90023722
  0.92810000   2.55956693
  0.92810000   1.90040991
  0.92810000   2.55961961
  0.92810000   1.90027346
  0.92810000   2.55955797
  0.92810000   1.90037396
  0.92810000   2.55958671
  0.92810000   1.90029361
  0.92810000   2.55954868
  0.92810000   1.90035194
  0.92810000   2.55956364
  0.92810000   1.90030449
  0.92810000   2.55953968
  0.92810000   1.90033821
  0.92810000   2.55954683
  0.92810000   1.90031007
  0.92810000   2.55953131
  0.92810000   1.90032944
  0.92810000   2.55953410
  0.92810000   1.90031264
  0.92810000   2.55952372
  0.92810000   1.90032366
  0.92810000   2.55952413
  0.92820000   1.89946844
  0.92820000   2.56036900
  0.92820000   1.89903577
  0.92820000   2.56019294
  0.92820000   1.89936557
  0.92820000   2.56030755
  0.92820000   1.89910687
  0.92820000   2.56020056
  0.92820000   1.89930317
  0.92820000   2.56026710
  0.92820000   1.89914838
  0.92820000   2.56020155
  0.92820000   1.89926507
  0.92820000   2.56023962
  0.92820000   1.89917235
  0.92820000   2.56019900
  0.92820000   1.89924159
  0.92820000   2.56022029
  0.92820000   1.89918595
  0.92820000   2.56019474
  0.92820000   1.89922693
  0.92820000   2.56020621
  0.92820000   1.89919344
  0.92820000   2.56018981
  0.92830000   1.89876194
  0.92830000   2.56119368
  0.92830000   1.89761349
  0.92830000   2.56074272
  0.92830000   1.89850428
  0.92830000   2.56107314
  0.92830000   1.89780524
  0.92830000   2.56079702
  0.92830000   1.89834669
  0.92830000   2.56099626
  0.92830000   1.89792114
  0.92830000   2.56082671
  0.92830000   1.89825005
  0.92830000   2.56094635
  0.92830000   1.89799091
  0.92830000   2.56084182
  0.92830000   1.89819057
  0.92830000   2.56091323
  0.92830000   1.89803268
  0.92830000   2.56084842
  0.92830000   1.89815379
  0.92830000   2.56089066
  0.92830000   1.89805750
  0.92830000   2.56085016
  0.92840000   1.89812150
  0.92840000   2.56204280
  0.92840000   1.89613926
  0.92840000   2.56126680
  0.92840000   1.89769402
  0.92840000   2.56185678
  0.92840000   1.89646485
  0.92840000   2.56137400
  0.92840000   1.89742845
  0.92840000   2.56173810
  0.92840000   1.89666621
  0.92840000   2.56143732
  0.92840000   1.89726319
  0.92840000   2.56166155
  0.92840000   1.89679043
  0.92840000   2.56147379
  0.92840000   1.89716012
  0.92840000   2.56161149
  0.92840000   1.89686684
  0.92840000   2.56149394
  0.92840000   1.89709566
  0.92840000   2.56157816
  0.92840000   1.89691365
  0.92840000   2.56150428
  0.92850000   1.89755061
  0.92850000   2.56291803
  0.92850000   1.89460959
  0.92850000   2.56176309
  0.92850000   1.89693922
  0.92850000   2.56266056
  0.92850000   1.89508141
  0.92850000   2.56192934
  0.92850000   1.89655298
  0.92850000   2.56249467
  0.92850000   1.89537936
  0.92850000   2.56203137
  0.92850000   1.89630860
  0.92850000   2.56238706
  0.92850000   1.89556714
  0.92850000   2.56209320
  0.92850000   1.89615373
  0.92850000   2.56231662
  0.92850000   1.89568524
  0.92850000   2.56212993
  0.92850000   1.89605541
  0.92850000   2.56226996
  0.92850000   1.89575934
  0.92850000   2.56215109
  0.92860000   1.89705238
  0.92860000   2.56382089
  0.92860000   1.89302127
  0.92860000   2.56222948
  0.92860000   1.89624422
  0.92860000   2.56348651
  0.92860000   1.89365069
  0.92860000   2.56246078
  0.92860000   1.89572494
  0.92860000   2.56326813
  0.92860000   1.89405615
  0.92860000   2.56260674
  0.92860000   1.89539073
  0.92860000   2.56312490
  0.92860000   1.89431689
  0.92860000   2.56269816
  0.92860000   1.89517534
  0.92860000   2.56303038
  0.92860000   1.89448429
  0.92860000   2.56275479
  0.92860000   1.89503633
  0.92860000   2.56296752
  0.92860000   1.89459157
  0.92860000   2.56278931
  0.92870000   1.89662952
  0.92870000   2.56475269
  0.92870000   1.89137154
  0.92870000   2.56266396
  0.92870000   1.89561325
  0.92870000   2.56433662
  0.92870000   1.89216853
  0.92870000   2.56296603
  0.92870000   1.89494914
  0.92870000   2.56406071
  0.92870000   1.89269197
  0.92870000   2.56316113
  0.92870000   1.89451435
  0.92870000   2.56387723
  0.92870000   1.89303520
  0.92870000   2.56328658
  0.92870000   1.89422930
  0.92870000   2.56375474
  0.92870000   1.89325994
  0.92870000   2.56336671
  0.92870000   1.89404220
  0.92870000   2.56367252
  0.92870000   1.89340688
  0.92870000   2.56341741
  0.92880000   1.89628428
  0.92880000   2.56571453
  0.92880000   1.88965807
  0.92880000   2.56306461
  0.92880000   1.89505036
  0.92880000   2.56521282
  0.92880000   1.89063095
  0.92880000   2.56344272
  0.92880000   1.89423049
  0.92880000   2.56487468
  0.92880000   1.89128210
  0.92880000   2.56369209
  0.92880000   1.89368452
  0.92880000   2.56464639
  0.92880000   1.89171727
  0.92880000   2.56385614
  0.92880000   1.89332041
  0.92880000   2.56449187
  0.92880000   1.89200772
  0.92880000   2.56396362
  0.92880000   1.89307730
  0.92880000   2.56438690
  0.92880000   1.89220133
  0.92880000   2.56403362
  0.92890000   1.89601846
  0.92890000   2.56670726
  0.92890000   1.88787898
  0.92890000   2.56342959
  0.92890000   1.89455940
  0.92890000   2.56611690
  0.92890000   1.88903415
  0.92890000   2.56388848
  0.92890000   1.89357392
  0.92890000   2.56571236
  0.92890000   1.88982177
  0.92890000   2.56419707
  0.92890000   1.89290657
  0.92890000   2.56543485
  0.92890000   1.89035803
  0.92890000   2.56440433
  0.92890000   1.89245389
  0.92890000   2.56524416
  0.92890000   1.89072270
  0.92890000   2.56454320
  0.92890000   1.89214644
  0.92890000   2.56511283
  0.92890000   1.89097041
  0.92890000   2.56463589
  0.92900000   1.89583339
  0.92900000   2.56773150
  0.92900000   1.88603292
  0.92900000   2.56375721
  0.92900000   1.89414394
  0.92900000   2.56705055
  0.92900000   1.88737462
  0.92900000   2.56430095
  0.92900000   1.89298441
  0.92900000   2.56657604
  0.92900000   1.88830616
  0.92900000   2.56467337
  0.92900000   1.89218610
  0.92900000   2.56624517
  0.92900000   1.88895212
  0.92900000   2.56492841
  0.92900000   1.89163540
  0.92900000   2.56601422
  0.92900000   1.88939953
  0.92900000   2.56510284
  0.92900000   1.89125500
  0.92900000   2.56585278
  0.92900000   1.88970908
  0.92900000   2.56522186
  0.92910000   1.89572995
  0.92910000   2.56878763
  0.92910000   1.88411903
  0.92910000   2.56404592
  0.92910000   1.89380727
  0.92910000   2.56801527
  0.92910000   1.88564916
  0.92910000   2.56467777
  0.92910000   1.89246685
  0.92910000   2.56746800
  0.92910000   1.88673055
  0.92910000   2.56511821
  0.92910000   1.89152889
  0.92910000   2.56708004
  0.92910000   1.88749399
  0.92910000   2.56542545
  0.92910000   1.89087105
  0.92910000   2.56680485
  0.92910000   1.88803238
  0.92910000   2.56563967
  0.92910000   1.89040897
  0.92910000   2.56660947
  0.92910000   1.88841170
  0.92910000   2.56578886
  0.92920000   1.89570858
  0.92920000   2.56987576
  0.92920000   1.88213692
  0.92920000   2.56429430
  0.92920000   1.89355240
  0.92920000   2.56901240
  0.92920000   1.88385494
  0.92920000   2.56501664
  0.92920000   1.89202609
  0.92920000   2.56839046
  0.92920000   1.88509030
  0.92920000   2.56552874
  0.92920000   1.89094093
  0.92920000   2.56794221
  0.92920000   1.88597790
  0.92920000   2.56589232
  0.92920000   1.89016734
  0.92920000   2.56761904
  0.92920000   1.88661507
  0.92920000   2.56615053
  0.92920000   1.88961490
  0.92920000   2.56738592
  0.92920000   1.88707204
  0.92920000   2.56633383
  0.92930000   1.89576933
  0.92930000   2.57099582
  0.92930000   1.88008671
  0.92930000   2.56450112
  0.92930000   1.89338200
  0.92930000   2.57004309
  0.92930000   1.88198948
  0.92930000   2.56531531
  0.92930000   1.89166686
  0.92930000   2.56934554
  0.92930000   1.88338092
  0.92930000   2.56590201
  0.92930000   1.89042834
  0.92930000   2.56883449
  0.92930000   1.88439804
  0.92930000   2.56632570
  0.92930000   1.88953118
  0.92930000   2.56845998
  0.92930000   1.88514099
  0.92930000   2.56663196
  0.92930000   1.88887997
  0.92930000   2.56818545
  0.92930000   1.88568326
  0.92930000   2.56685336
  0.92940000   1.89591189
  0.92940000   2.57214749
  0.92940000   1.87796892
  0.92940000   2.56466527
  0.92940000   1.89329841
  0.92940000   2.57110829
  0.92940000   1.88005074
  0.92940000   2.56557161
  0.92940000   1.89139372
  0.92940000   2.57033527
  0.92940000   1.88159818
  0.92940000   2.56623505
  0.92940000   1.88999733
  0.92940000   2.56975970
  0.92940000   1.88274851
  0.92940000   2.56672209
  0.92940000   1.88896983
  0.92940000   2.56933100
  0.92940000   1.88360324
  0.92940000   2.56708020
  0.92940000   1.88821200
  0.92940000   2.56901161
  0.92940000   1.88423794
  0.92940000   2.56734367
  0.92950000   1.89613562
  0.92950000   2.57333027
  0.92950000   1.87578449
  0.92950000   2.56478583
  0.92950000   1.89330368
  0.92950000   2.57220875
  0.92950000   1.87803709
  0.92950000   2.56578345
  0.92950000   1.89121107
  0.92950000   2.57136153
  0.92950000   1.87973811
  0.92950000   2.56652485
  0.92950000   1.88965418
  0.92950000   2.57072063
  0.92950000   1.88102348
  0.92950000   2.56707786
  0.92950000   1.88849091
  0.92950000   2.57023553
  0.92950000   1.88199464
  0.92950000   2.56749121
  0.92950000   1.88761936
  0.92950000   2.56986827
  0.92950000   1.88272811
  0.92950000   2.56780053
  0.92960000   1.89643966
  0.92960000   2.57454350
  0.92960000   1.87353470
  0.92960000   2.56486201
  0.92960000   1.89339951
  0.92960000   2.57334498
  0.92960000   1.87594733
  0.92960000   2.56594884
  0.92960000   1.89112309
  0.92960000   2.57242603
  0.92960000   1.87779708
  0.92960000   2.56676842
  0.92960000   1.88940516
  0.92960000   2.57172002
  0.92960000   1.87921719
  0.92960000   2.56738920
  0.92960000   1.88810230
  0.92960000   2.57117713
  0.92960000   1.88030782
  0.92960000   2.56786068
  0.92960000   1.88711106
  0.92960000   2.57075951
  0.92960000   1.88114527
  0.92960000   2.56821932
  0.92970000   1.89682289
  0.92970000   2.57578637
  0.92970000   1.87122115
  0.92970000   2.56489318
  0.92970000   1.89358733
  0.92970000   2.57451730
  0.92970000   1.87378072
  0.92970000   2.56606594
  0.92970000   1.89113373
  0.92970000   2.57353028
  0.92970000   1.87577184
  0.92970000   2.56696280
  0.92970000   1.88925651
  0.92970000   2.57276051
  0.92970000   1.87732411
  0.92970000   2.56765225
  0.92970000   1.88781211
  0.92970000   2.57215936
  0.92970000   1.87853529
  0.92970000   2.56818402
  0.92970000   1.88669662
  0.92970000   2.57168961
  0.92970000   1.87948051
  0.92970000   2.56859501
  0.92980000   1.89728408
  0.92980000   2.57705794
  0.92980000   1.86884569
  0.92980000   2.56487884
  0.92980000   1.89386826
  0.92980000   2.57572582
  0.92980000   1.87153693
  0.92980000   2.56613302
  0.92980000   1.89124665
  0.92980000   2.57467557
  0.92980000   1.87365962
  0.92980000   2.56710506
  0.92980000   1.88921432
  0.92980000   2.57384457
  0.92980000   1.87533899
  0.92980000   2.56786303
  0.92980000   1.88762859
  0.92980000   2.57318578
  0.92980000   1.87666963
  0.92980000   2.56845643
  0.92980000   1.88638602
  0.92980000   2.57266301
  0.92980000   1.87772458
  0.92980000   2.56892218
  0.92990000   1.89782184
  0.92990000   2.57835717
  0.92990000   1.86641041
  0.92990000   2.56481865
  0.92990000   1.89424315
  0.92990000   2.57697044
  0.92990000   1.86921609
  0.92990000   2.56614850
  0.92990000   1.89146521
  0.92990000   2.57586298
  0.92990000   1.87145811
  0.92990000   2.56719239
  0.92990000   1.88928453
  0.92990000   2.57497451
  0.92990000   1.87325700
  0.92990000   2.56801759
  0.92990000   1.88756007
  0.92990000   2.57425986
  0.92990000   1.87470355
  0.92990000   2.56867294
  0.92990000   1.88618965
  0.92990000   2.57368421
  0.92990000   1.87586808
  0.92990000   2.56919504
  0.93000000   1.89843470
  0.93000000   2.57968294
  0.93000000   1.86391757
  0.93000000   2.56471236
  0.93000000   1.89471256
  0.93000000   2.57825083
  0.93000000   1.86681875
  0.93000000   2.56611098
  0.93000000   1.89179243
  0.93000000   2.57709327
  0.93000000   1.86916558
  0.93000000   2.56722212
  0.93000000   1.88947279
  0.93000000   2.57615234
  0.93000000   1.87107381
  0.93000000   2.56811196
  0.93000000   1.88761480
  0.93000000   2.57538491
  0.93000000   1.87263011
  0.93000000   2.56882845
  0.93000000   1.88611817
  0.93000000   2.57475772
  0.93000000   1.87390159
  0.93000000   2.56940748
  0.93010000   1.89912114
  0.93010000   2.58103404
  0.93010000   1.86136961
  0.93010000   2.56455991
  0.93010000   1.89527679
  0.93010000   2.57956647
  0.93010000   1.86434590
  0.93010000   2.56601923
  0.93010000   1.89223097
  0.93010000   2.57836693
  0.93010000   1.86678093
  0.93010000   2.56719172
  0.93010000   1.88978439
  0.93010000   2.57737978
  0.93010000   1.86878575
  0.93010000   2.56814231
  0.93010000   1.88780083
  0.93010000   2.57656395
  0.93010000   1.87044288
  0.93010000   2.56891780
  0.93010000   1.88618230
  0.93010000   2.57588789
  0.93010000   1.87181593
  0.93010000   2.56955318
  0.93020000   1.89987959
  0.93020000   2.58240922
  0.93020000   1.85876908
  0.93020000   2.56436131
  0.93020000   1.89593589
  0.93020000   2.58091665
  0.93020000   1.86179898
  0.93020000   2.56587223
  0.93020000   1.89278303
  0.93020000   2.57968412
  0.93020000   1.86430370
  0.93020000   2.56709893
  0.93020000   1.89022419
  0.93020000   2.57865816
  0.93020000   1.86638994
  0.93020000   2.56810497
  0.93020000   1.88812588
  0.93020000   2.57779967
  0.93020000   1.86813616
  0.93020000   2.56893590
  0.93020000   1.88639268
  0.93020000   2.57707884
  0.93020000   1.86960247
  0.93020000   2.56962566
  0.93030000   1.90070846
  0.93030000   2.58380716
  0.93030000   1.85611869
  0.93030000   2.56411674
  0.93030000   1.89668961
  0.93030000   2.58230040
  0.93030000   1.85917985
  0.93030000   2.56566919
  0.93030000   1.89345038
  0.93030000   2.58104465
  0.93030000   1.86173417
  0.93030000   2.56694171
  0.93030000   1.89079646
  0.93030000   2.57998837
  0.93030000   1.86388439
  0.93030000   2.56799652
  0.93030000   1.88859712
  0.93030000   2.57909429
  0.93030000   1.86570523
  0.93030000   2.56887785
  0.93030000   1.88675962
  0.93030000   2.57833426
  0.93030000   1.86725339
  0.93030000   2.56961849
  0.93040000   1.90160609
  0.93040000   2.58522650
  0.93040000   1.85342123
  0.93040000   2.56382651
  0.93040000   1.89753742
  0.93040000   2.58371661
  0.93040000   1.85649081
  0.93040000   2.56540957
  0.93040000   1.89423425
  0.93040000   2.58244798
  0.93040000   1.85907338
  0.93040000   2.56671842
  0.93040000   1.89150478
  0.93040000   2.58137079
  0.93040000   1.86126817
  0.93040000   2.56781392
  0.93040000   1.88922100
  0.93040000   2.58044942
  0.93040000   1.86314656
  0.93040000   2.56873905
  0.93040000   1.88729273
  0.93040000   2.57965725
  0.93040000   1.86476212
  0.93040000   2.56952542
  0.93050000   1.90257081
  0.93050000   2.58666583
  0.93050000   1.85067962
  0.93050000   2.56349107
  0.93050000   1.89847850
  0.93050000   2.58516391
  0.93050000   1.85373460
  0.93050000   2.56509312
  0.93050000   1.89513530
  0.93050000   2.58389315
  0.93050000   1.85632318
  0.93050000   2.56642777
  0.93050000   1.89235193
  0.93050000   2.58280524
  0.93050000   1.85854153
  0.93050000   2.56755459
  0.93050000   1.89000297
  0.93050000   2.58186599
  0.93050000   1.86045808
  0.93050000   2.56851537
  0.93050000   1.88800069
  0.93050000   2.58105010
  0.93050000   1.86212368
  0.93050000   2.56934063
  0.93060000   1.90360087
  0.93060000   2.58812368
  0.93060000   1.84789689
  0.93060000   2.56311101
  0.93060000   1.89951171
  0.93060000   2.58664075
  0.93060000   1.85091440
  0.93060000   2.56471987
  0.93060000   1.89615356
  0.93060000   2.58537883
  0.93060000   1.85348629
  0.93060000   2.56606892
  0.93060000   1.89333976
  0.93060000   2.58429093
  0.93060000   1.85570600
  0.93060000   2.56721654
  0.93060000   1.89094733
  0.93060000   2.58334409
  0.93060000   1.85763944
  0.93060000   2.56820337
  0.93060000   1.88889079
  0.93060000   2.58251417
  0.93060000   1.85933512
  0.93060000   2.56905895
  0.93070000   1.90469447
  0.93070000   2.58959854
  0.93070000   1.84507618
  0.93070000   2.56268711
  0.93070000   1.90063556
  0.93070000   2.58814536
  0.93070000   1.84803384
  0.93070000   2.56429020
  0.93070000   1.89728840
  0.93070000   2.58690324
  0.93070000   1.85056629
  0.93070000   2.56564157
  0.93070000   1.89446906
  0.93070000   2.58582638
  0.93070000   1.85276449
  0.93070000   2.56679844
  0.93070000   1.89205692
  0.93070000   2.58488290
  0.93070000   1.85469217
  0.93070000   2.56780044
  0.93070000   1.88996859
  0.93070000   2.58404961
  0.93070000   1.85639589
  0.93070000   2.56867619
  0.93080000   1.90584968
  0.93080000   2.59108884
  0.93080000   1.84222075
  0.93080000   2.56222032
  0.93080000   1.90184821
  0.93080000   2.58967578
  0.93080000   1.84509698
  0.93080000   2.56380483
  0.93080000   1.89853843
  0.93080000   2.58846420
  0.93080000   1.84756763
  0.93080000   2.56514598
  0.93080000   1.89573943
  0.93080000   2.58740945
  0.93080000   1.84972135
  0.93080000   2.56629981
  0.93080000   1.89333294
  0.93080000   2.58648060
  0.93080000   1.85161993
  0.93080000   2.56730502
  0.93080000   1.89123748
  0.93080000   2.58565525
  0.93080000   1.85330825
  0.93080000   2.56818939
  0.93090000   1.90706448
  0.93090000   2.59259297
  0.93090000   1.83933400
  0.93090000   2.56171175
  0.93090000   1.90314742
  0.93090000   2.59122984
  0.93090000   1.84210829
  0.93090000   2.56326485
  0.93090000   1.89990150
  0.93090000   2.59005912
  0.93090000   1.84449566
  0.93090000   2.56458301
  0.93090000   1.89714922
  0.93090000   2.58903729
  0.93090000   1.84658241
  0.93090000   2.56572105
  0.93090000   1.89477470
  0.93090000   2.58813430
  0.93090000   1.84842854
  0.93090000   2.56671675
  0.93090000   1.89269835
  0.93090000   2.58732847
  0.93090000   1.85007746
  0.93090000   2.56759715
  0.93100000   1.90833666
  0.93100000   2.59410924
  0.93100000   1.83641943
  0.93100000   2.56116273
  0.93100000   1.90453056
  0.93100000   2.59280519
  0.93100000   1.83907266
  0.93100000   2.56267175
  0.93100000   1.90137469
  0.93100000   2.59168500
  0.93100000   1.84135656
  0.93100000   2.56395417
  0.93100000   1.89869542
  0.93100000   2.59070636
  0.93100000   1.84335497
  0.93100000   2.56506354
  0.93100000   1.89637951
  0.93100000   2.58984005
  0.93100000   1.84512612
  0.93100000   2.56603667
  0.93100000   1.89434926
  0.93100000   2.58906508
  0.93100000   1.84671203
  0.93100000   2.56689989
  0.93110000   1.90966387
  0.93110000   2.59563592
  0.93110000   1.83348070
  0.93110000   2.56057478
  0.93110000   1.90599459
  0.93110000   2.59439931
  0.93110000   1.83599535
  0.93110000   2.56202740
  0.93110000   1.90295422
  0.93110000   2.59333849
  0.93110000   1.83815729
  0.93110000   2.56326167
  0.93110000   1.90037363
  0.93110000   2.59241244
  0.93110000   1.84004769
  0.93110000   2.56432970
  0.93110000   1.89814249
  0.93110000   2.59159285
  0.93110000   1.84172294
  0.93110000   2.56526729
  0.93110000   1.89618515
  0.93110000   2.59085940
  0.93110000   1.84322367
  0.93110000   2.56610004
  0.93120000   1.91104355
  0.93120000   2.59717123
  0.93120000   1.83052154
  0.93120000   2.55994962
  0.93120000   1.90753602
  0.93120000   2.59600951
  0.93120000   1.83288196
  0.93120000   2.56133406
  0.93120000   1.90463551
  0.93120000   2.59501588
  0.93120000   1.83490553
  0.93120000   2.56250837
  0.93120000   1.90217805
  0.93120000   2.59415074
  0.93120000   1.83667054
  0.93120000   2.56352301
  0.93120000   1.90005661
  0.93120000   2.59338673
  0.93120000   1.83823135
  0.93120000   2.56441268
  0.93120000   1.89819777
  0.93120000   2.59270426
  0.93120000   1.83962715
  0.93120000   2.56520220
  0.93130000   1.91247293
  0.93130000   2.59871334
  0.93130000   1.82754582
  0.93130000   2.55928917
  0.93130000   1.90915098
  0.93130000   2.59763297
  0.93130000   1.82973837
  0.93130000   2.56059441
  0.93130000   1.90641317
  0.93130000   2.59671319
  0.93130000   1.83160958
  0.93130000   2.56169781
  0.93130000   1.90410148
  0.93130000   2.59591592
  0.93130000   1.83323456
  0.93130000   2.56264800
  0.93130000   1.90211263
  0.93130000   2.59521487
  0.93130000   1.83466548
  0.93130000   2.56347845
  0.93130000   1.90037569
  0.93130000   2.59459121
  0.93130000   1.83593995
  0.93130000   2.56421312
  0.93140000   1.91394902
  0.93140000   2.60026036
  0.93140000   1.82455751
  0.93140000   2.55859556
  0.93140000   1.91083513
  0.93140000   2.59926679
  0.93140000   1.82657070
  0.93140000   2.55981145
  0.93140000   1.90828102
  0.93140000   2.59842622
  0.93140000   1.82827822
  0.93140000   2.56083414
  0.93140000   1.90613544
  0.93140000   2.59770227
  0.93140000   1.82975168
  0.93140000   2.56171017
  0.93140000   1.90429928
  0.93140000   2.59706980
  0.93140000   1.83104088
  0.93140000   2.56247166
  0.93140000   1.90270442
  0.93140000   2.59651078
  0.93140000   1.83218174
  0.93140000   2.56314161
  0.93150000   1.91546856
  0.93150000   2.60181041
  0.93150000   1.82156062
  0.93150000   2.55787109
  0.93150000   1.91258379
  0.93150000   2.60090796
  0.93150000   1.82338524
  0.93150000   2.55898857
  0.93150000   1.91023222
  0.93150000   2.60015059
  0.93150000   1.82492058
  0.93150000   2.55992209
  0.93150000   1.90827024
  0.93150000   2.59950375
  0.93150000   1.82623446
  0.93150000   2.56071592
  0.93150000   1.90660346
  0.93150000   2.59894354
  0.93150000   1.82737412
  0.93150000   2.56140066
  0.93150000   1.90516683
  0.93150000   2.59845280
  0.93150000   1.82837367
  0.93150000   2.56199826
  0.93160000   1.91702810
  0.93160000   2.60336154
  0.93160000   1.81855923
  0.93160000   2.55711826
  0.93160000   1.91439187
  0.93160000   2.60255345
  0.93160000   1.82018835
  0.93160000   2.55812941
  0.93160000   1.91225925
  0.93160000   2.60188186
  0.93160000   1.82154599
  0.93160000   2.55896689
  0.93160000   1.91049518
  0.93160000   2.60131420
  0.93160000   1.82269580
  0.93160000   2.55967239
  0.93160000   1.90901051
  0.93160000   2.60082792
  0.93160000   1.82368227
  0.93160000   2.56027486
  0.93160000   1.90774358
  0.93160000   2.60040677
  0.93160000   1.82453761
  0.93160000   2.56079509
  0.93170000   1.91862389
  0.93170000   2.60491184
  0.93170000   1.81555743
  0.93170000   2.55633972
  0.93170000   1.91625398
  0.93170000   2.60420022
  0.93170000   1.81698645
  0.93170000   2.55723792
  0.93170000   1.91435407
  0.93170000   2.60361556
  0.93170000   1.81816378
  0.93170000   2.55797416
  0.93170000   1.91279872
  0.93170000   2.60312746
  0.93170000   1.81914859
  0.93170000   2.55858729
  0.93170000   1.91150457
  0.93170000   2.60271478
  0.93170000   1.81998238
  0.93170000   2.55910441
  0.93170000   1.91041374
  0.93170000   2.60236229
  0.93170000   1.82069530
  0.93170000   2.55954508
  0.93180000   1.92025196
  0.93180000   2.60645939
  0.93180000   1.81255929
  0.93180000   2.55553822
  0.93180000   1.91816442
  0.93180000   2.60584528
  0.93180000   1.81378584
  0.93180000   2.55631820
  0.93180000   1.91650823
  0.93180000   2.60534732
  0.93180000   1.81478316
  0.93180000   2.55694980
  0.93180000   1.91516870
  0.93180000   2.60493750
  0.93180000   1.81560545
  0.93180000   2.55746868
  0.93180000   1.91406902
  0.93180000   2.60459625
  0.93180000   1.81629095
  0.93180000   2.55789989
  0.93180000   1.91315553
  0.93180000   2.60430942
  0.93180000   1.81686753
  0.93180000   2.55826157
  0.93190000   1.92190810
  0.93190000   2.60800229
  0.93190000   1.80956884
  0.93190000   2.55471668
  0.93190000   1.92011726
  0.93190000   2.60748571
  0.93190000   1.81059270
  0.93190000   2.55537453
  0.93190000   1.91871295
  0.93190000   2.60707292
  0.93190000   1.81141302
  0.93190000   2.55589989
  0.93190000   1.91759263
  0.93190000   2.60673859
  0.93190000   1.81207843
  0.93190000   2.55632480
  0.93190000   1.91668692
  0.93190000   2.60646493
  0.93190000   1.81262347
  0.93190000   2.55667192
  0.93190000   1.91594702
  0.93190000   2.60623904
  0.93190000   1.81307342
  0.93190000   2.55695779
  0.93200000   1.92358784
  0.93200000   2.60953868
  0.93200000   1.80659003
  0.93200000   2.55387806
  0.93200000   1.92210641
  0.93200000   2.60911867
  0.93200000   1.80741300
  0.93200000   2.55441124
  0.93200000   1.92095932
  0.93200000   2.60878835
  0.93200000   1.80806181
  0.93200000   2.55483054
  0.93200000   1.92005791
  0.93200000   2.60852542
  0.93200000   1.80857873
  0.93200000   2.55516379
  0.93200000   1.91934145
  0.93200000   2.60831415
  0.93200000   1.80899400
  0.93200000   2.55543085
  0.93200000   1.91876688
  0.93200000   2.60814313
  0.93200000   1.80932982
  0.93200000   2.55564631
  0.93210000   1.92528650
  0.93210000   2.61106678
  0.93210000   1.80362670
  0.93210000   2.55302539
  0.93210000   1.92412562
  0.93210000   2.61074153
  0.93210000   1.80425237
  0.93210000   2.55343269
  0.93210000   1.92323837
  0.93210000   2.61048990
  0.93210000   1.80473735
  0.93210000   2.55374779
  0.93210000   1.92255210
  0.93210000   2.61029316
  0.93210000   1.80511647
  0.93210000   2.55399353
  0.93210000   1.92201635
  0.93210000   2.61013806
  0.93210000   1.80541483
  0.93210000   2.55418641
  0.93210000   1.92159500
  0.93210000   2.61001496
  0.93210000   1.80565089
  0.93210000   2.55433857
  0.93220000   1.92699912
  0.93220000   2.61258484
  0.93220000   1.80068254
  0.93220000   2.55216173
  0.93220000   1.92616862
  0.93220000   2.61235177
  0.93220000   1.80111610
  0.93220000   2.55244318
  0.93220000   1.92554123
  0.93220000   2.61217419
  0.93220000   1.80144679
  0.93220000   2.55265747
  0.93220000   1.92506316
  0.93220000   2.61203762
  0.93220000   1.80170056
  0.93220000   2.55282145
  0.93220000   1.92469629
  0.93220000   2.61193178
  0.93220000   1.80189629
  0.93220000   2.55294745
  0.93220000   1.92441311
  0.93220000   2.61184921
  0.93220000   1.80204791
  0.93220000   2.55304460
  0.93230000   1.92872049
  0.93230000   2.61409122
  0.93230000   1.79776109
  0.93230000   2.55129015
  0.93230000   1.92822908
  0.93230000   2.61394712
  0.93230000   1.79800907
  0.93230000   2.55144690
  0.93230000   1.92785928
  0.93230000   2.61383825
  0.93230000   1.79819646
  0.93230000   2.55156512
  0.93230000   1.92757966
  0.93230000   2.61375524
  0.93230000   1.79833854
  0.93230000   2.55165434
  0.93230000   1.92736724
  0.93230000   2.61369142
  0.93230000   1.79844665
  0.93230000   2.55172176
  0.93230000   1.92720510
  0.93230000   2.61364197
  0.93230000   1.79852921
  0.93230000   2.55177277
  0.93240000   1.93044511
  0.93240000   2.61558434
  0.93240000   1.79486572
  0.93240000   2.55041369
  0.93240000   1.93030072
  0.93240000   2.61552550
  0.93240000   1.79493569
  0.93240000   2.55044786
  0.93240000   1.93018421
  0.93240000   2.61547950
  0.93240000   1.79499184
  0.93240000   2.55047587
  0.93240000   1.93009100
  0.93240000   2.61544312
  0.93240000   1.79503656
  0.93240000   2.55049827
  0.93240000   1.93001667
  0.93240000   2.61541407
  0.93240000   1.79507209
  0.93240000   2.55051593
  0.93240000   1.92995734
  0.93240000   2.61539065
  0.93240000   1.79510033
  0.93240000   2.55052974
  0.93250000   1.93216715
  0.93250000   2.61706273
  0.93250000   1.79199959
  0.93250000   2.54953537
  0.93250000   1.93237735
  0.93250000   2.61708508
  0.93250000   1.79189988
  0.93250000   2.54944988
  0.93250000   1.93250815
  0.93250000   2.61709578
  0.93250000   1.79183753
  0.93250000   2.54939440
  0.93250000   1.93258751
  0.93250000   2.61709906
  0.93250000   1.79179938
  0.93250000   2.54935847
  0.93250000   1.93263372
  0.93250000   2.61709780
  0.93250000   1.79177683
  0.93250000   2.54933531
  0.93250000   1.93265878
  0.93250000   2.61709391
  0.93250000   1.79176427
  0.93250000   2.54932047
  0.93260000   1.93388038
  0.93260000   2.61852500
  0.93260000   1.78916571
  0.93260000   2.54865814
  0.93260000   1.93445283
  0.93260000   2.61862428
  0.93260000   1.78890504
  0.93260000   2.54845650
  0.93260000   1.93482378
  0.93260000   2.61868538
  0.93260000   1.78873722
  0.93260000   2.54832486
  0.93260000   1.93506059
  0.93260000   2.61872148
  0.93260000   1.78863039
  0.93260000   2.54823933
  0.93260000   1.93520933
  0.93260000   2.61874153
  0.93260000   1.78856327
  0.93260000   2.54818400
  0.93260000   1.93530089
  0.93260000   2.61875144
  0.93260000   1.78852181
  0.93260000   2.54814834
  0.93270000   1.93557804
  0.93270000   2.61996985
  0.93270000   1.78636688
  0.93270000   2.54778491
  0.93270000   1.93652114
  0.93270000   2.62014174
  0.93270000   1.78595411
  0.93270000   2.54747100
  0.93270000   1.93712432
  0.93270000   2.62024699
  0.93270000   1.78569376
  0.93270000   2.54727086
  0.93270000   1.93750278
  0.93270000   2.62030942
  0.93270000   1.78553174
  0.93270000   2.54714439
  0.93270000   1.93773619
  0.93270000   2.62034492
  0.93270000   1.78543221
  0.93270000   2.54706497
  0.93270000   1.93787755
  0.93270000   2.62036381
  0.93270000   1.78537195
  0.93270000   2.54701532
  0.93280000   1.93725273
  0.93280000   2.62139605
  0.93280000   1.78360577
  0.93280000   2.54691857
  0.93280000   1.93857636
  0.93280000   2.62163636
  0.93280000   1.78304948
  0.93280000   2.54649635
  0.93280000   1.93940362
  0.93280000   2.62177970
  0.93280000   1.78270915
  0.93280000   2.54623545
  0.93280000   1.93990774
  0.93280000   2.62186245
  0.93280000   1.78250444
  0.93280000   2.54607633
  0.93280000   1.94020869
  0.93280000   2.62190832
  0.93280000   1.78238310
  0.93280000   2.54598010
  0.93280000   1.94038483
  0.93280000   2.62193222
  0.93280000   1.78231228
  0.93280000   2.54592222
  0.93290000   1.93889619
  0.93290000   2.62280241
  0.93290000   1.78088493
  0.93290000   2.54606196
  0.93290000   1.94061257
  0.93290000   2.62310725
  0.93290000   1.78019309
  0.93290000   2.54553520
  0.93290000   1.94165617
  0.93290000   2.62328297
  0.93290000   1.77978462
  0.93290000   2.54522114
  0.93290000   1.94227032
  0.93290000   2.62338062
  0.93290000   1.77954849
  0.93290000   2.54503709
  0.93290000   1.94262283
  0.93290000   2.62343257
  0.93290000   1.77941431
  0.93290000   2.54493037
  0.93290000   1.94282066
  0.93290000   2.62345841
  0.93290000   1.77933935
  0.93290000   2.54486889
  0.93300000   1.94049901
  0.93300000   2.62418780
  0.93300000   1.77820686
  0.93300000   2.54521794
  0.93300000   1.94262386
  0.93300000   2.62455375
  0.93300000   1.77738644
  0.93300000   2.54458994
  0.93300000   1.94387705
  0.93300000   2.62475660
  0.93300000   1.77692072
  0.93300000   2.54422988
  0.93300000   1.94458641
  0.93300000   2.62486439
  0.93300000   1.77666307
  0.93300000   2.54402790
  0.93300000   1.94497606
  0.93300000   2.62491891
  0.93300000   1.77652334
  0.93300000   2.54391601
  0.93300000   1.94518460
  0.93300000   2.62494442
  0.93300000   1.77644903
  0.93300000   2.54385446
  0.93310000   1.94205025
  0.93310000   2.62555105
  0.93310000   1.77557410
  0.93310000   2.54438943
  0.93310000   1.94460415
  0.93310000   2.62597536
  0.93310000   1.77463063
  0.93310000   2.54366263
  0.93310000   1.94606198
  0.93310000   2.62620064
  0.93310000   1.77411737
  0.93310000   2.54326315
  0.93310000   1.94685296
  0.93310000   2.62631453
  0.93310000   1.77384665
  0.93310000   2.54304936
  0.93310000   1.94726707
  0.93310000   2.62636889
  0.93310000   1.77370711
  0.93310000   2.54293659
  0.93310000   1.94747744
  0.93310000   2.62639247
  0.93310000   1.77363678
  0.93310000   2.54287754
  0.93320000   1.94353686
  0.93320000   2.62689092
  0.93320000   1.77298934
  0.93320000   2.54357955
  0.93320000   1.94654701
  0.93320000   2.62737178
  0.93320000   1.77192642
  0.93320000   2.54275508
  0.93320000   1.94820717
  0.93320000   2.62761545
  0.93320000   1.77137398
  0.93320000   2.54232197
  0.93320000   1.94906783
  0.93320000   2.62773208
  0.93320000   1.77109718
  0.93320000   2.54210157
  0.93320000   1.94949563
  0.93320000   2.62778424
  0.93320000   1.77096211
  0.93320000   2.54199125
  0.93320000   1.94970097
  0.93320000   2.62780486
  0.93320000   1.77089790
  0.93320000   2.54193641
  0.93330000   1.94494297
  0.93330000   2.62820603
  0.93330000   1.77045558
  0.93330000   2.54279167
  0.93330000   1.94844541
  0.93330000   2.62874281
  0.93330000   1.76927433
  0.93330000   2.54186891
  0.93330000   1.95030930
  0.93330000   2.62900156
  0.93330000   1.76868953
  0.93330000   2.54140695
  0.93330000   1.95122973
  0.93330000   2.62911825
  0.93330000   1.76841220
  0.93330000   2.54118422
  0.93330000   1.95166239
  0.93330000   2.62916678
  0.93330000   1.76828461
  0.93330000   2.54107876
  0.93330000   1.95185769
  0.93330000   2.62918390
  0.93330000   1.76822770
  0.93330000   2.54102914
  0.93340000   1.94624877
  0.93340000   2.62949473
  0.93340000   1.76797643
  0.93340000   2.54202968
  0.93340000   1.95029128
  0.93340000   2.63008834
  0.93340000   1.76667467
  0.93340000   2.54100554
  0.93340000   1.95236535
  0.93340000   2.63035966
  0.93340000   1.76606262
  0.93340000   2.54051837
  0.93340000   1.95333804
  0.93340000   2.63047441
  0.93340000   1.76578899
  0.93340000   2.54029664
  0.93340000   1.95376869
  0.93340000   2.63051838
  0.93340000   1.76567081
  0.93340000   2.54019768
  0.93340000   1.95395056
  0.93340000   2.63053181
  0.93340000   1.76562161
  0.93340000   2.54015372
  0.93350000   1.94742907
  0.93350000   2.63075491
  0.93350000   1.76555642
  0.93350000   2.54129828
  0.93350000   1.95207487
  0.93350000   2.63140829
  0.93350000   1.76412772
  0.93350000   2.54016635
  0.93350000   1.95437246
  0.93350000   2.63169060
  0.93350000   1.76349164
  0.93350000   2.53965624
  0.93350000   1.95539275
  0.93350000   2.63180198
  0.93350000   1.76322464
  0.93350000   2.53943791
  0.93350000   1.95581638
  0.93350000   2.63184090
  0.93350000   1.76311690
  0.93350000   2.53934642
  0.93350000   1.95598282
  0.93350000   2.63185068
  0.93350000   1.76307533
  0.93350000   2.53930816
  0.93360000   1.94845124
  0.93360000   2.63198376
  0.93360000   1.76320158
  0.93360000   2.54060341
  0.93360000   1.95378384
  0.93360000   2.63270256
  0.93360000   1.76163384
  0.93360000   2.53935277
  0.93360000   1.95632767
  0.93360000   2.63299525
  0.93360000   1.76097479
  0.93360000   2.53882034
  0.93360000   1.95739427
  0.93360000   2.63310241
  0.93360000   1.76071620
  0.93360000   2.53860696
  0.93360000   1.95780769
  0.93360000   2.63313614
  0.93360000   1.76061923
  0.93360000   2.53852333
  0.93360000   1.95795786
  0.93360000   2.63314251
  0.93360000   1.76058480
  0.93360000   2.53849051
  0.93370000   1.94927226
  0.93370000   2.63317736
  0.93370000   1.76092033
  0.93370000   2.53995299
  0.93370000   1.95540171
  0.93370000   2.63397087
  0.93370000   1.75919371
  0.93370000   2.53856646
  0.93370000   1.95822752
  0.93370000   2.63427457
  0.93370000   1.75851020
  0.93370000   2.53801031
  0.93370000   1.95934331
  0.93370000   2.63437716
  0.93370000   1.75826069
  0.93370000   2.53780258
  0.93370000   1.95974507
  0.93370000   2.63440581
  0.93370000   1.75817426
  0.93370000   2.53772679
  0.93370000   1.95987902
  0.93370000   2.63440910
  0.93370000   1.75814630
  0.93370000   2.53769895
  0.93380000   1.94983473
  0.93380000   2.63433000
  0.93380000   1.75872479
  0.93380000   2.53935806
  0.93380000   1.95690554
  0.93380000   2.63521266
  0.93380000   1.75680871
  0.93380000   2.53780959
  0.93380000   1.96006746
  0.93380000   2.63552949
  0.93380000   1.75609600
  0.93380000   2.53722573
  0.93380000   1.96124075
  0.93380000   2.63562765
  0.93380000   1.75585525
  0.93380000   2.53702351
  0.93380000   1.96163110
  0.93380000   2.63565153
  0.93380000   1.75577871
  0.93380000   2.53695519
  0.93380000   1.96174958
  0.93380000   2.63565211
  0.93380000   1.75575641
  0.93380000   2.53693177
  0.93390000   1.95006135
  0.93390000   2.63543318
  0.93390000   1.75663300
  0.93390000   2.53883464
  0.93390000   1.95826205
  0.93390000   2.63642680
  0.93390000   1.75448140
  0.93390000   2.53708533
  0.93390000   1.96184092
  0.93390000   2.63676089
  0.93390000   1.75373048
  0.93390000   2.53646619
  0.93390000   1.96308737
  0.93390000   2.63685524
  0.93390000   1.75349707
  0.93390000   2.53626849
  0.93390000   1.96346836
  0.93390000   2.63687479
  0.93390000   1.75342950
  0.93390000   2.53620702
  0.93390000   1.96357267
  0.93390000   2.63687307
  0.93390000   1.75341201
  0.93390000   2.53618741
  0.93400000   1.94984751
  0.93400000   2.63647381
  0.93400000   1.75467258
  0.93400000   2.53840677
  0.93400000   1.95942123
  0.93400000   2.63761113
  0.93400000   1.75221658
  0.93400000   2.53639868
  0.93400000   1.96353750
  0.93400000   2.63796952
  0.93400000   1.75141218
  0.93400000   2.53573148
  0.93400000   1.96488362
  0.93400000   2.63806122
  0.93400000   1.75118353
  0.93400000   2.53553629
  0.93400000   1.96525939
  0.93400000   2.63807697
  0.93400000   1.75112378
  0.93400000   2.53548084
  0.93400000   1.96535122
  0.93400000   2.63807336
  0.93400000   1.75111030
  0.93400000   2.53546442
  0.93410000   1.94905161
  0.93410000   2.63743129
  0.93410000   1.75288682
  0.93410000   2.53811167
  0.93410000   1.96030566
  0.93410000   2.63876162
  0.93410000   1.75002308
  0.93410000   2.53575804
  0.93410000   1.96513977
  0.93410000   2.63915589
  0.93410000   1.74914023
  0.93410000   2.53502174
  0.93410000   1.96662917
  0.93410000   2.63924679
  0.93410000   1.74891221
  0.93410000   2.53482575
  0.93410000   1.96700656
  0.93410000   2.63925936
  0.93410000   1.74885896
  0.93410000   2.53477533
  0.93410000   1.96708795
  0.93410000   2.63925420
  0.93410000   1.74884872
  0.93410000   2.53476152
  0.93420000   1.94748332
  0.93420000   2.63827254
  0.93420000   1.75134501
  0.93420000   2.53800836
  0.93420000   1.96079250
  0.93420000   2.63987063
  0.93420000   1.74791742
  0.93420000   2.53517831
  0.93420000   1.96661680
  0.93420000   2.64032004
  0.93420000   1.74691474
  0.93420000   2.53433794
  0.93420000   1.96832199
  0.93420000   2.64041304
  0.93420000   1.74668091
  0.93420000   2.53413582
  0.93420000   1.96871202
  0.93420000   2.64042312
  0.93420000   1.74663266
  0.93420000   2.53408927
  0.93420000   1.96878537
  0.93420000   2.64041674
  0.93420000   1.74662497
  0.93420000   2.53407754
  0.93430000   1.94489031
  0.93430000   2.63894362
  0.93430000   1.75015979
  0.93430000   2.53819208
  0.93430000   1.96068333
  0.93430000   2.64092327
  0.93430000   1.74593153
  0.93430000   2.53468745
  0.93430000   1.96791051
  0.93430000   2.64146112
  0.93430000   1.74473792
  0.93430000   2.53368277
  0.93430000   1.96995654
  0.93430000   2.64156093
  0.93430000   1.74448773
  0.93430000   2.53346567
  0.93430000   1.97037749
  0.93430000   2.64156930
  0.93430000   1.74444273
  0.93430000   2.53342155
  0.93430000   1.97044573
  0.93430000   2.64156198
  0.93430000   1.74443696
  0.93430000   2.53341142
  0.93440000   1.94094596
  0.93440000   2.63935594
  0.93440000   1.74951556
  0.93440000   2.53881753
  0.93440000   1.95965552
  0.93440000   2.64188920
  0.93440000   1.74412985
  0.93440000   2.53434118
  0.93440000   1.96890518
  0.93440000   2.64257621
  0.93440000   1.74261657
  0.93440000   2.53306279
  0.93440000   1.97151920
  0.93440000   2.64269120
  0.93440000   1.74233129
  0.93440000   2.53281478
  0.93440000   1.97200402
  0.93440000   2.64269886
  0.93440000   1.74228720
  0.93440000   2.53277119
  0.93440000   1.97207110
  0.93440000   2.64269086
  0.93440000   1.74228281
  0.93440000   2.53276219
  0.93450000   1.93524274
  0.93450000   2.63936495
  0.93450000   1.74971272
  0.93450000   2.54013397
  0.93450000   1.95718838
  0.93450000   2.64270353
  0.93450000   1.74264909
  0.93450000   2.53425674
  0.93450000   1.96935710
  0.93450000   2.64365711
  0.93450000   1.74056918
  0.93450000   2.53249459
  0.93450000   1.97297562
  0.93450000   2.64380421
  0.93450000   1.74021112
  0.93450000   2.53218343
  0.93450000   1.97359106
  0.93450000   2.64381268
  0.93450000   1.74016434
  0.93450000   2.53213730
  0.93450000   1.97366325
  0.93450000   2.64380422
  0.93450000   1.74016080
  0.93450000   2.53212901
  0.93460000   1.92729954
  0.93460000   2.63873978
  0.93460000   1.75123064
  0.93460000   2.54253178
  0.93460000   1.95246452
  0.93460000   2.64322226
  0.93460000   1.74179044
  0.93460000   2.53469112
  0.93460000   1.96873154
  0.93460000   2.64467951
  0.93460000   1.73864920
  0.93460000   2.53202480
  0.93460000   1.97422913
  0.93460000   2.64489934
  0.93460000   1.73812925
  0.93460000   2.53157399
  0.93460000   1.97513374
  0.93460000   2.64491152
  0.93460000   1.73807266
  0.93460000   2.53151919
  0.93460000   1.97522366
  0.93460000   2.64490283
  0.93460000   1.73806936
  0.93460000   2.53151108
  0.93470000   1.91659525
  0.93470000   2.63712743
  0.93470000   1.75480281
  0.93470000   2.54658805
  0.93470000   1.94427155
  0.93470000   2.64312321
  0.93470000   1.74222421
  0.93470000   2.53621172
  0.93470000   1.96584605
  0.93470000   2.64556094
  0.93470000   1.73703370
  0.93470000   2.53180647
  0.93470000   1.97496208
  0.93470000   2.64597227
  0.93470000   1.73609677
  0.93470000   2.53099666
  0.93470000   1.97661111
  0.93470000   2.64599602
  0.93470000   1.73601111
  0.93470000   2.53091650
  0.93470000   1.97675311
  0.93470000   2.64598742
  0.93470000   1.73600705
  0.93470000   2.53090770
  0.93480000   1.90264313
  0.93480000   2.63402597
  0.93480000   1.76147507
  0.93480000   2.55307180
  0.93480000   1.93098577
  0.93480000   2.64171336
  0.93480000   1.74538831
  0.93480000   2.54001246
  0.93480000   1.95820559
  0.93480000   2.64598629
  0.93480000   1.73638582
  0.93480000   2.53241055
  0.93480000   1.97398770
  0.93480000   2.64699680
  0.93480000   1.73417544
  0.93480000   2.53050557
  0.93480000   1.97791124
  0.93480000   2.64706635
  0.93480000   1.73398028
  0.93480000   2.53033029
  0.93480000   1.97824953
  0.93480000   2.64705868
  0.93480000   1.73397258
  0.93480000   2.53031823
  0.93490000   1.88511753
  0.93490000   2.62880041
  0.93490000   1.77257862
  0.93490000   2.56282809
  0.93490000   1.91081075
  0.93490000   2.63765385
  0.93490000   1.75406303
  0.93490000   2.54828646
  0.93490000   1.94120394
  0.93490000   2.64475174
  0.93490000   1.73920935
  0.93490000   2.53597059
  0.93490000   1.96686102
  0.93490000   2.64772789
  0.93490000   1.73289712
  0.93490000   2.53056237
  0.93490000   1.97807648
  0.93490000   2.64811791
  0.93490000   1.73199645
  0.93490000   2.52977544
  0.93490000   1.97968273
  0.93490000   2.64811741
  0.93490000   1.73196480
  0.93490000   2.52974221
  0.93500000   1.86402949
  0.93500000   2.62079232
  0.93500000   1.78950972
  0.93500000   2.57643535
  0.93500000   1.88250461
  0.93500000   2.62885253
  0.93500000   1.77262170
  0.93500000   2.56400008
  0.93500000   1.90855572
  0.93500000   2.63806209
  0.93500000   1.75337660
  0.93500000   2.54887562
  0.93500000   1.94019868
  0.93500000   2.64564281
  0.93500000   1.73752958
  0.93500000   2.53569267
  0.93500000   1.96768627
  0.93500000   2.64882192
  0.93500000   1.73079624
  0.93500000   2.52989459
  0.93500000   1.97972137
  0.93500000   2.64916638
  0.93500000   1.72998816
  0.93500000   2.52918447
  0.93510000   1.83991683
  0.93510000   2.60956430
  0.93510000   1.81322135
  0.93510000   2.59361190
  0.93510000   1.84666213
  0.93510000   2.61320165
  0.93510000   1.80554952
  0.93510000   2.58859742
  0.93510000   1.85714846
  0.93510000   2.61856296
  0.93510000   1.79428829
  0.93510000   2.58092482
  0.93510000   1.87323085
  0.93510000   2.62604513
  0.93510000   1.77861743
  0.93510000   2.56963540
  0.93510000   1.89691298
  0.93510000   2.63534615
  0.93510000   1.75918566
  0.93510000   2.55468275
  0.93510000   1.92825221
  0.93510000   2.64432455
  0.93510000   1.74044995
  0.93510000   2.53931409
  0.93520000   1.81397151
  0.93520000   2.59524645
  0.93520000   1.84347907
  0.93520000   2.61264015
  0.93520000   1.80695921
  0.93520000   2.59068408
  0.93520000   1.85301121
  0.93520000   2.61762642
  0.93520000   1.79647312
  0.93520000   2.58359597
  0.93520000   1.86786597
  0.93520000   2.62477931
  0.93520000   1.78147987
  0.93520000   2.57290528
  0.93520000   1.89029910
  0.93520000   2.63407676
  0.93520000   1.76204531
  0.93520000   2.55810514
  0.93520000   1.92134314
  0.93520000   2.64378006
  0.93520000   1.74180075
  0.93520000   2.54161136
  0.93520000   1.95585073
  0.93520000   2.64996978
  0.93530000   1.78799640
  0.93530000   2.57881934
  0.93530000   1.87822840
  0.93530000   2.63046418
  0.93530000   1.76988826
  0.93530000   2.56538405
  0.93530000   1.90640984
  0.93530000   2.64072238
  0.93530000   1.74845674
  0.93530000   2.54832838
  0.93530000   1.94214291
  0.93530000   2.64921999
  0.93530000   1.73070445
  0.93530000   2.53329938
  0.93530000   1.97351143
  0.93530000   2.65224080
  0.93530000   1.72427576
  0.93530000   2.52765723
  0.93530000   1.98522512
  0.93530000   2.65224460
  0.93530000   1.72416648
  0.93530000   2.52755194
  0.93530000   1.98541578
  0.93530000   2.65222757
  0.93540000   1.76410970
  0.93540000   2.56208145
  0.93540000   1.91364474
  0.93540000   2.64398522
  0.93540000   1.74190579
  0.93540000   2.54404703
  0.93540000   1.95140684
  0.93540000   2.65165012
  0.93540000   1.72586336
  0.93540000   2.53023355
  0.93540000   1.98020675
  0.93540000   2.65338862
  0.93540000   1.72207735
  0.93540000   2.52687169
  0.93540000   1.98716286
  0.93540000   2.65323956
  0.93540000   1.72230693
  0.93540000   2.52706669
  0.93540000   1.98672631
  0.93540000   2.65324036
  0.93540000   1.72228414
  0.93540000   2.52704071
  0.93540000   1.98675882
  0.93540000   2.65322879
  0.93550000   1.74422598
  0.93550000   2.54716271
  0.93550000   1.94519894
  0.93550000   2.65189708
  0.93550000   1.72561240
  0.93550000   2.53118221
  0.93550000   1.97854922
  0.93550000   2.65445543
  0.93550000   1.72010771
  0.93550000   2.52628305
  0.93550000   1.98870280
  0.93550000   2.65423543
  0.93550000   1.72045484
  0.93550000   2.52658168
  0.93550000   1.98804258
  0.93550000   2.65424532
  0.93550000   1.72040949
  0.93550000   2.52653426
  0.93550000   1.98811523
  0.93550000   2.65422971
  0.93550000   1.72041849
  0.93550000   2.52653669
  0.93550000   1.98808905
  0.93550000   2.65422040
  0.93560000   1.72949747
  0.93560000   2.53575889
  0.93560000   1.96932702
  0.93560000   2.65531385
  0.93560000   1.71862426
  0.93560000   2.52612579
  0.93560000   1.98935773
  0.93560000   2.65526577
  0.93560000   1.71854615
  0.93560000   2.52604005
  0.93560000   1.98948464
  0.93560000   2.65523737
  0.93560000   1.71856607
  0.93560000   2.52604898
  0.93560000   1.98943297
  0.93560000   2.65522385
  0.93560000   1.71856629
  0.93560000   2.52604237
  0.93560000   1.98942107
  0.93560000   2.65521183
  0.93560000   1.71856879
  0.93560000   2.52603911
  0.93560000   1.98940697
  0.93560000   2.65520220
  0.93570000   1.71998305
  0.93570000   2.52851845
  0.93570000   1.98471327
  0.93570000   2.65650269
  0.93570000   1.71625979
  0.93570000   2.52515305
  0.93570000   1.99165877
  0.93570000   2.65618102
  0.93570000   1.71682514
  0.93570000   2.52564990
  0.93570000   1.99057801
  0.93570000   2.65621994
  0.93570000   1.71671657
  0.93570000   2.52554368
  0.93570000   1.99076759
  0.93570000   2.65619418
  0.93570000   1.71674084
  0.93570000   2.52555880
  0.93570000   1.99071059
  0.93570000   2.65618471
  0.93570000   1.71673856
  0.93570000   2.52555131
  0.93570000   1.99070545
  0.93570000   2.65617471
  0.93580000   1.71472757
  0.93580000   2.52494381
  0.93580000   1.99244014
  0.93580000   2.65719802
  0.93580000   1.71495470
  0.93580000   2.52512952
  0.93580000   1.99198647
  0.93580000   2.65719673
  0.93580000   1.71491234
  0.93580000   2.52508000
  0.93580000   1.99204811
  0.93580000   2.65717282
  0.93580000   1.71492625
  0.93580000   2.52508417
  0.93580000   1.99200764
  0.93580000   2.65715967
  0.93580000   1.71492631
  0.93580000   2.52507759
  0.93580000   1.99199608
  0.93580000   2.65714787
  0.93580000   1.71492866
  0.93580000   2.52507431
  0.93580000   1.99198224
  0.93580000   2.65713842
  0.93590000   1.71221272
  0.93590000   2.52381329
  0.93590000   1.99507352
  0.93590000   2.65804889
  0.93590000   1.71336426
  0.93590000   2.52484409
  0.93590000   1.99286294
  0.93590000   2.65817683
  0.93590000   1.71307002
  0.93590000   2.52456592
  0.93590000   1.99340280
  0.93590000   2.65812093
  0.93590000   1.71314684
  0.93590000   2.52462740
  0.93590000   1.99324289
  0.93590000   2.65811615
  0.93590000   1.71313067
  0.93590000   2.52460612
  0.93590000   1.99326211
  0.93590000   2.65810235
  0.93590000   1.71313698
  0.93590000   2.52460649
  0.93590000   1.99324071
  0.93590000   2.65809349
  0.93600000   1.71093691
  0.93600000   2.52380442
  0.93600000   1.99537139
  0.93600000   2.65905794
  0.93600000   1.71146588
  0.93600000   2.52427234
  0.93600000   1.99433849
  0.93600000   2.65910903
  0.93600000   1.71132265
  0.93600000   2.52413088
  0.93600000   1.99459336
  0.93600000   2.65907033
  0.93600000   1.71136624
  0.93600000   2.52416243
  0.93600000   1.99449608
  0.93600000   2.65906197
  0.93600000   1.71135710
  0.93600000   2.52414755
  0.93600000   1.99450203
  0.93600000   2.65904901
  0.93600000   1.71136184
  0.93600000   2.52414654
  0.93600000   1.99448353
  0.93600000   2.65904006
  0.93610000   1.70984007
  0.93610000   2.52395703
  0.93610000   1.99533408
  0.93610000   2.66009327
  0.93610000   1.70951684
  0.93610000   2.52364608
  0.93610000   1.99592905
  0.93610000   2.66001909
  0.93610000   1.70962032
  0.93610000   2.52373032
  0.93610000   1.99571273
  0.93610000   2.66001671
  0.93610000   1.70959267
  0.93610000   2.52369681
  0.93610000   1.99575146
  0.93610000   2.65999801
  0.93610000   1.70960393
  0.93610000   2.52370063
  0.93610000   1.99571840
  0.93610000   2.65998813
  0.93610000   1.70960265
  0.93610000   2.52369416
  0.93610000   1.99571136
  0.93610000   2.65997836
  0.93620000   1.70842659
  0.93620000   2.52381638
  0.93620000   1.99591017
  0.93620000   2.66107941
  0.93620000   1.70766538
  0.93620000   2.52310120
  0.93620000   1.99735062
  0.93620000   2.66092951
  0.93620000   1.70791870
  0.93620000   2.52332400
  0.93620000   1.99684492
  0.93620000   2.66095408
  0.93620000   1.70783787
  0.93620000   2.52324144
  0.93620000   1.99698621
  0.93620000   2.66092617
  0.93620000   1.70786740
  0.93620000   2.52326217
  0.93620000   1.99691788
  0.93620000   2.66091957
  0.93620000   1.70785968
  0.93620000   2.52324979
  0.93620000   1.99692321
  0.93620000   2.66090874
  0.93630000   1.70663488
  0.93630000   2.52332214
  0.93630000   1.99722603
  0.93630000   2.66199816
  0.93630000   1.70594768
  0.93630000   2.52267245
  0.93630000   1.99853040
  0.93630000   2.66185106
  0.93630000   1.70619624
  0.93630000   2.52289195
  0.93630000   1.99803159
  0.93630000   2.66187827
  0.93630000   1.70611010
  0.93630000   2.52280421
  0.93630000   1.99818385
  0.93630000   2.66184838
  0.93630000   1.70614366
  0.93630000   2.52282882
  0.93630000   1.99810743
  0.93630000   2.66184296
  0.93630000   1.70613362
  0.93630000   2.52281430
  0.93630000   1.99811729
  0.93630000   2.66183165
  0.93640000   1.70461208
  0.93640000   2.52260626
  0.93640000   1.99900632
  0.93640000   2.66286099
  0.93640000   1.70434185
  0.93640000   2.52234115
  0.93640000   1.99950724
  0.93640000   2.66278451
  0.93640000   1.70445116
  0.93640000   2.52243232
  0.93640000   1.99927672
  0.93640000   2.66278779
  0.93640000   1.70441239
  0.93640000   2.52238828
  0.93640000   1.99933771
  0.93640000   2.66276602
  0.93640000   1.70442997
  0.93640000   2.52239821
  0.93640000   1.99929200
  0.93640000   2.66275798
  0.93640000   1.70442512
  0.93640000   2.52238850
  0.93640000   1.99929184
  0.93640000   2.66274758
  0.93650000   1.70253542
  0.93650000   2.52183093
  0.93650000   2.00091208
  0.93650000   2.66369192
  0.93650000   1.70280079
  0.93650000   2.52206461
  0.93650000   2.00037021
  0.93650000   2.66372381
  0.93650000   1.70269537
  0.93650000   2.52195593
  0.93650000   2.00055768
  0.93650000   2.66368382
  0.93650000   1.70274245
  0.93650000   2.52199187
  0.93650000   2.00045148
  0.93650000   2.66367950
  0.93650000   1.70272546
  0.93650000   2.52196966
  0.93650000   2.00047301
  0.93650000   2.66366454
  0.93650000   1.70273437
  0.93650000   2.52197278
  0.93650000   2.00044604
  0.93650000   2.66365698
  0.93660000   1.70053175
  0.93660000   2.52111443
  0.93660000   2.00269593
  0.93660000   2.66451649
  0.93660000   1.70127384
  0.93660000   2.52179612
  0.93660000   2.00121693
  0.93660000   2.66465981
  0.93660000   1.70094693
  0.93660000   2.52147960
  0.93660000   2.00183932
  0.93660000   2.66456958
  0.93660000   1.70109389
  0.93660000   2.52160935
  0.93660000   2.00153689
  0.93660000   2.66458822
  0.93660000   1.70103131
  0.93660000   2.52154439
  0.93660000   2.00164790
  0.93660000   2.66456296
  0.93660000   1.70106070
  0.93660000   2.52156676
  0.93660000   2.00158067
  0.93660000   2.66456012
  0.93670000   1.69867127
  0.93670000   2.52052394
  0.93670000   2.00421721
  0.93670000   2.66535587
  0.93670000   1.69971864
  0.93670000   2.52149598
  0.93670000   2.00213037
  0.93670000   2.66558307
  0.93670000   1.69922461
  0.93670000   2.52102109
  0.93670000   2.00308445
  0.93670000   2.66544954
  0.93670000   1.69945786
  0.93670000   2.52123263
  0.93670000   2.00261083
  0.93670000   2.66549067
  0.93670000   1.69935051
  0.93670000   2.52112535
  0.93670000   2.00281046
  0.93670000   2.66545409
  0.93670000   1.69940247
  0.93670000   2.52116909
  0.93670000   2.00269852
  0.93670000   2.66545700
  0.93680000   1.69698696
  0.93680000   2.52009252
  0.93680000   2.00540653
  0.93680000   2.66622574
  0.93680000   1.69810372
  0.93680000   2.52113423
  0.93680000   2.00317339
  0.93680000   2.66648480
  0.93680000   1.69754594
  0.93680000   2.52059729
  0.93680000   2.00425771
  0.93680000   2.66632894
  0.93680000   1.69782388
  0.93680000   2.52085199
  0.93680000   2.00369365
  0.93680000   2.66638449
  0.93680000   1.69768778
  0.93680000   2.52071717
  0.93680000   2.00395104
  0.93680000   2.66633936
  0.93680000   1.69775683
  0.93680000   2.52077727
  0.93680000   2.00380483
  0.93680000   2.66634727
  0.93690000   1.69548841
  0.93690000   2.51983136
  0.93690000   2.00624020
  0.93690000   2.66713600
  0.93690000   1.69640917
  0.93690000   2.52069130
  0.93690000   2.00438702
  0.93690000   2.66735736
  0.93690000   1.69592622
  0.93690000   2.52022324
  0.93690000   2.00532753
  0.93690000   2.66721339
  0.93690000   1.69618073
  0.93690000   2.52045680
  0.93690000   2.00480760
  0.93690000   2.66726655
  0.93690000   1.69604931
  0.93690000   2.52032594
  0.93690000   2.00505681
  0.93690000   2.66722085
  0.93690000   1.69611958
  0.93690000   2.52038748
  0.93690000   2.00490757
  0.93690000   2.66723006
  0.93700000   1.69416474
  0.93700000   2.51973202
  0.93700000   2.00673549
  0.93700000   2.66808951
  0.93700000   1.69462916
  0.93700000   2.52016074
  0.93700000   2.00578498
  0.93700000   2.66819536
  0.93700000   1.69437629
  0.93700000   2.51990994
  0.93700000   2.00627077
  0.93700000   2.66810800
  0.93700000   1.69451820
  0.93700000   2.52003726
  0.93700000   2.00597324
  0.93700000   2.66813342
  0.93700000   1.69444203
  0.93700000   2.51995854
  0.93700000   2.00611335
  0.93700000   2.66810121
  0.93700000   1.69448548
  0.93700000   2.51999482
  0.93700000   2.00601699
  0.93700000   2.66810399
  0.93710000   1.69298477
  0.93710000   2.51976631
  0.93710000   2.00695104
  0.93710000   2.66908134
  0.93710000   1.69277354
  0.93710000   2.51955096
  0.93710000   2.00734979
  0.93710000   2.66899705
  0.93710000   1.69289975
  0.93710000   2.51966157
  0.93710000   2.00707855
  0.93710000   2.66901614
  0.93710000   1.69282953
  0.93710000   2.51958671
  0.93710000   2.00720458
  0.93710000   2.66898200
  0.93710000   1.69287211
  0.93710000   2.51962121
  0.93710000   2.00710753
  0.93710000   2.66898320
  0.93710000   1.69284898
  0.93710000   2.51959405
  0.93710000   2.00714409
  0.93710000   2.66896731
  0.93720000   1.69190164
  0.93720000   2.51989053
  0.93720000   2.00697807
  0.93720000   2.67010004
  0.93720000   1.69086521
  0.93720000   2.51888299
  0.93720000   2.00903748
  0.93720000   2.66976493
  0.93720000   1.69149171
  0.93720000   2.51947421
  0.93720000   2.00775893
  0.93720000   2.66993858
  0.93720000   1.69111317
  0.93720000   2.51910335
  0.93720000   2.00850544
  0.93720000   2.66981032
  0.93720000   1.69134352
  0.93720000   2.51931819
  0.93720000   2.00803041
  0.93720000   2.66986923
  0.93720000   1.69120529
  0.93720000   2.51918054
  0.93720000   2.00829857
  0.93720000   2.66981820
  0.93730000   1.69086166
  0.93730000   2.52005382
  0.93730000   2.00692293
  0.93730000   2.67113083
  0.93730000   1.68893371
  0.93730000   2.51818470
  0.93730000   2.01078977
  0.93730000   2.67050516
  0.93730000   1.69013997
  0.93730000   2.51933676
  0.93730000   2.00833500
  0.93730000   2.67087344
  0.93730000   1.68937287
  0.93730000   2.51859050
  0.93730000   2.00986891
  0.93730000   2.67061793
  0.93730000   1.68985718
  0.93730000   2.51905080
  0.93730000   2.00887912
  0.93730000   2.67076090
  0.93730000   1.68955120
  0.93730000   2.51875116
  0.93730000   2.00948706
  0.93730000   2.67065504
  0.93740000   1.68981232
  0.93740000   2.52020594
  0.93740000   2.00689092
  0.93740000   2.67215849
  0.93740000   1.68700940
  0.93740000   2.51748520
  0.93740000   2.01254559
  0.93740000   2.67122643
  0.93740000   1.68882714
  0.93740000   2.51923300
  0.93740000   2.00884071
  0.93740000   2.67181662
  0.93740000   1.68761684
  0.93740000   2.51805584
  0.93740000   2.01127896
  0.93740000   2.67140606
  0.93740000   1.68841069
  0.93740000   2.51881715
  0.93740000   2.00965756
  0.93740000   2.67165869
  0.93740000   1.68788572
  0.93740000   2.51830482
  0.93740000   2.01071181
  0.93740000   2.67147673
  0.93750000   1.68870537
  0.93750000   2.52030022
  0.93750000   2.00698002
  0.93750000   2.67316845
  0.93750000   1.68512127
  0.93750000   2.51681284
  0.93750000   2.01424556
  0.93750000   2.67193946
  0.93750000   1.68753180
  0.93750000   2.51914253
  0.93750000   2.00931871
  0.93750000   2.67276205
  0.93750000   1.68585720
  0.93750000   2.51751096
  0.93750000   2.01271130
  0.93750000   2.67217783
  0.93750000   1.68699780
  0.93750000   2.51861159
  0.93750000   2.01037752
  0.93750000   2.67256168
  0.93750000   1.68621075
  0.93750000   2.51784325
  0.93750000   2.01196928
  0.93750000   2.67228309
  0.93760000   1.68749450
  0.93760000   2.52029138
  0.93760000   2.00728554
  0.93760000   2.67414585
  0.93760000   1.68329892
  0.93760000   2.51619699
  0.93760000   2.01582796
  0.93760000   2.67265755
  0.93760000   1.68622728
  0.93760000   2.51903959
  0.93760000   2.00982306
  0.93760000   2.67370120
  0.93760000   1.68411095
  0.93760000   2.51697243
  0.93760000   2.01413119
  0.93760000   2.67293904
  0.93760000   1.68560690
  0.93760000   2.51842316
  0.93760000   2.01106188
  0.93760000   2.67346678
  0.93760000   1.68453243
  0.93760000   2.51737235
  0.93760000   2.01324709
  0.93760000   2.67307563
  0.93770000   1.68613106
  0.93770000   2.52013129
  0.93770000   2.00790892
  0.93770000   2.67507337
  0.93770000   1.68157676
  0.93770000   2.51567227
  0.93770000   2.01722015
  0.93770000   2.67339822
  0.93770000   1.68487843
  0.93770000   2.51888991
  0.93770000   2.01042581
  0.93770000   2.67462180
  0.93770000   1.68240262
  0.93770000   2.51646444
  0.93770000   2.01548786
  0.93770000   2.67369966
  0.93770000   1.68421808
  0.93770000   2.51823263
  0.93770000   2.01175099
  0.93770000   2.67436746
  0.93770000   1.68286381
  0.93770000   2.51690487
  0.93770000   2.01451853
  0.93770000   2.67385884
  0.93780000   1.68456228
  0.93780000   2.51976713
  0.93780000   2.00896166
  0.93780000   2.67592924
  0.93780000   1.67999811
  0.93780000   2.51528248
  0.93780000   2.01832997
  0.93780000   2.67418490
  0.93780000   1.68343834
  0.93780000   2.51864721
  0.93780000   2.01122431
  0.93780000   2.67550595
  0.93780000   1.68076783
  0.93780000   2.51602245
  0.93780000   2.01670679
  0.93780000   2.67447587
  0.93780000   1.68279893
  0.93780000   2.51800834
  0.93780000   2.01251141
  0.93780000   2.67525182
  0.93780000   1.68122866
  0.93780000   2.51646425
  0.93780000   2.01573433
  0.93780000   2.67464237
  0.93790000   1.68273553
  0.93790000   2.51914520
  0.93790000   2.01055708
  0.93790000   2.67668638
  0.93790000   1.67861701
  0.93790000   2.51508250
  0.93790000   2.01904195
  0.93790000   2.67504741
  0.93790000   1.68184733
  0.93790000   2.51825210
  0.93790000   2.01234364
  0.93790000   2.67632852
  0.93790000   1.67925674
  0.93790000   2.51569674
  0.93790000   2.01768226
  0.93790000   2.67529214
  0.93790000   1.68130053
  0.93790000   2.51770197
  0.93790000   2.01344476
  0.93790000   2.67610019
  0.93790000   1.67966620
  0.93790000   2.51608951
  0.93790000   2.01681248
  0.93790000   2.67544376
  0.93800000   1.68060902
  0.93800000   2.51822129
  0.93800000   2.01278864
  0.93800000   2.67731359
  0.93800000   1.67749587
  0.93800000   2.51513599
  0.93800000   2.01922186
  0.93800000   2.67601974
  0.93800000   1.68003750
  0.93800000   2.51763613
  0.93800000   2.01392810
  0.93800000   2.67705630
  0.93800000   1.67793557
  0.93800000   2.51555408
  0.93800000   2.01827374
  0.93800000   2.67618198
  0.93800000   1.67965590
  0.93800000   2.51724671
  0.93800000   2.01469168
  0.93800000   2.67688288
  0.93800000   1.67823567
  0.93800000   2.51584001
  0.93800000   2.01762815
  0.93800000   2.67629122
  0.93810000   1.67816590
  0.93810000   2.51697455
  0.93810000   2.01570049
  0.93810000   2.67777947
  0.93810000   1.67669776
  0.93810000   2.51550749
  0.93810000   2.01873327
  0.93810000   2.67713396
  0.93810000   1.67794514
  0.93810000   2.51673364
  0.93810000   2.01611609
  0.93810000   2.67764962
  0.93810000   1.67688366
  0.93810000   2.51567484
  0.93810000   2.01831177
  0.93810000   2.67718551
  0.93810000   1.67778503
  0.93810000   2.51656180
  0.93810000   2.01642233
  0.93810000   2.67755919
  0.93810000   1.67701837
  0.93810000   2.51579759
  0.93810000   2.01800894
  0.93810000   2.67722461
  0.93820000   1.67542589
  0.93820000   2.51541959
  0.93820000   2.01926187
  0.93820000   2.67805944
  0.93820000   1.67627248
  0.93820000   2.51624824
  0.93820000   2.01746705
  0.93820000   2.67841010
  0.93820000   1.67553104
  0.93820000   2.51550180
  0.93820000   2.01899800
  0.93820000   2.67806790
  0.93820000   1.67618242
  0.93820000   2.51614180
  0.93820000   2.01762133
  0.93820000   2.67834122
  0.93820000   1.67561151
  0.93820000   2.51556850
  0.93820000   2.01880261
  0.93820000   2.67808002
  0.93820000   1.67611246
  0.93820000   2.51606153
  0.93820000   2.01774543
  0.93820000   2.67829144
  0.93830000   1.67244859
  0.93830000   2.51361091
  0.93830000   2.02335800
  0.93830000   2.67814438
  0.93830000   1.67623917
  0.93830000   2.51737843
  0.93830000   2.01537893
  0.93830000   2.67984518
  0.93830000   1.67280244
  0.93830000   2.51394285
  0.93830000   2.02256912
  0.93830000   2.67828055
  0.93830000   1.67589364
  0.93830000   2.51701810
  0.93830000   2.01606800
  0.93830000   2.67967124
  0.93830000   1.67309217
  0.93830000   2.51421939
  0.93830000   2.02193251
  0.93830000   2.67839766
  0.93830000   1.67561377
  0.93830000   2.51672907
  0.93830000   2.01663176
  0.93830000   2.67953336
  0.93840000   1.66932509
  0.93840000   2.51163591
  0.93840000   2.02780476
  0.93840000   2.67804762
  0.93840000   1.67657200
  0.93840000   2.51887269
  0.93840000   2.01252008
  0.93840000   2.68140753
  0.93840000   1.66982408
  0.93840000   2.51211653
  0.93840000   2.02670360
  0.93840000   2.67828084
  0.93840000   1.67603177
  0.93840000   2.51831905
  0.93840000   2.01361740
  0.93840000   2.68116549
  0.93840000   1.67024868
  0.93840000   2.51253069
  0.93840000   2.02577778
  0.93840000   2.67848353
  0.93840000   1.67558028
  0.93840000   2.51785936
  0.93840000   2.01454139
  0.93840000   2.68096409
  0.93850000   1.66616003
  0.93850000   2.50959801
  0.93850000   2.03238449
  0.93850000   2.67780602
  0.93850000   1.67719791
  0.93850000   2.52065791
  0.93850000   2.00904238
  0.93850000   2.68304219
  0.93850000   1.66670697
  0.93850000   2.51013074
  0.93850000   2.03117423
  0.93850000   2.67809507
  0.93850000   1.67654507
  0.93850000   2.51999309
  0.93850000   2.01037565
  0.93850000   2.68277643
  0.93850000   1.66717752
  0.93850000   2.51059432
  0.93850000   2.03014482
  0.93850000   2.67834706
  0.93850000   1.67599422
  0.93850000   2.51943505
  0.93850000   2.01150822
  0.93850000   2.68255105
  0.93860000   1.66305023
  0.93860000   2.50759541
  0.93860000   2.03689076
  0.93860000   2.67747274
  0.93860000   1.67801067
  0.93860000   2.52262792
  0.93860000   2.00516815
  0.93860000   2.68468659
  0.93860000   1.66357647
  0.93860000   2.50811076
  0.93860000   2.03571744
  0.93860000   2.67777860
  0.93860000   1.67732331
  0.93860000   2.52192986
  0.93860000   2.00657335
  0.93860000   2.68443322
  0.93860000   1.66402106
  0.93860000   2.50855107
  0.93860000   2.03473730
  0.93860000   2.67804003
  0.93860000   1.67675281
  0.93860000   2.52135312
  0.93860000   2.00774683
  0.93860000   2.68422088
  0.93870000   1.66006748
  0.93870000   2.50570308
  0.93870000   2.04116614
  0.93870000   2.67710410
  0.93870000   1.67889722
  0.93870000   2.52467006
  0.93870000   2.00113441
  0.93870000   2.68628861
  0.93870000   1.66053623
  0.93870000   2.50616285
  0.93870000   2.04010994
  0.93870000   2.67739796
  0.93870000   1.67823322
  0.93870000   2.52399629
  0.93870000   2.00249006
  0.93870000   2.68606818
  0.93870000   1.66091429
  0.93870000   2.50653784
  0.93870000   2.03926732
  0.93870000   2.67763776
  0.93870000   1.67770550
  0.93870000   2.52346292
  0.93870000   2.00357331
  0.93870000   2.68589091
  0.93880000   1.65725056
  0.93880000   2.50396358
  0.93880000   2.04512152
  0.93880000   2.67674627
  0.93880000   1.67976444
  0.93880000   2.52669209
  0.93880000   1.99713615
  0.93880000   2.68781740
  0.93880000   1.65764686
  0.93880000   2.50435144
  0.93880000   2.04421657
  0.93880000   2.67700967
  0.93880000   1.67916110
  0.93880000   2.52607933
  0.93880000   1.99836429
  0.93880000   2.68763722
  0.93880000   1.65794436
  0.93880000   2.50464568
  0.93880000   2.04354376
  0.93880000   2.67720949
  0.93880000   1.67871327
  0.93880000   2.52562591
  0.93880000   1.99927967
  0.93880000   2.68750150
  0.93890000   1.65460710
  0.93890000   2.50238780
  0.93890000   2.04873420
  0.93890000   2.67642734
  0.93890000   1.68055543
  0.93890000   2.52863803
  0.93890000   1.99329231
  0.93890000   2.68926347
  0.93890000   1.65492620
  0.93890000   2.50269784
  0.93890000   2.04799279
  0.93890000   2.67664814
  0.93890000   1.68003739
  0.93890000   2.52811030
  0.93890000   1.99434169
  0.93890000   2.68912323
  0.93890000   1.65514429
  0.93890000   2.50291146
  0.93890000   2.04748943
  0.93890000   2.67679984
  0.93890000   1.67968607
  0.93890000   2.52775286
  0.93890000   1.99505476
  0.93890000   2.68902590
  0.93900000   1.65212235
  0.93900000   2.50096326
  0.93900000   2.05203057
  0.93900000   2.67615662
  0.93900000   1.68125097
  0.93900000   2.53048934
  0.93900000   1.98964291
  0.93900000   2.69063174
  0.93900000   1.65236366
  0.93900000   2.50119392
  0.93900000   2.05145591
  0.93900000   2.67632632
  0.93900000   1.68083561
  0.93900000   2.53006337
  0.93900000   1.99047758
  0.93900000   2.69052733
  0.93900000   1.65251099
  0.93900000   2.50133499
  0.93900000   2.05110491
  0.93900000   2.67642898
  0.93900000   1.68058286
  0.93900000   2.52980355
  0.93900000   1.99098437
  0.93900000   2.69046078
  0.93910000   1.64977025
  0.93910000   2.49966512
  0.93910000   2.05506286
  0.93910000   2.67592970
  0.93910000   1.68185957
  0.93910000   2.53225476
  0.93910000   1.98617014
  0.93910000   2.69193302
  0.93910000   1.64993720
  0.93910000   2.49981915
  0.93910000   2.05464912
  0.93910000   2.67604407
  0.93910000   1.68155563
  0.93910000   2.53193878
  0.93910000   1.98677215
  0.93910000   2.69185791
  0.93910000   1.65002714
  0.93910000   2.49990091
  0.93910000   2.05442270
  0.93910000   2.67610280
  0.93910000   1.68139135
  0.93910000   2.53176630
  0.93910000   1.98709402
  0.93910000   2.69181303
  0.93920000   1.64752334
  0.93920000   2.49846641
  0.93920000   2.05788768
  0.93920000   2.67573579
  0.93920000   1.68240275
  0.93920000   2.53395571
  0.93920000   1.98282908
  0.93920000   2.69317789
  0.93920000   1.64762553
  0.93920000   2.49855318
  0.93920000   2.05761521
  0.93920000   2.67579737
  0.93920000   1.68220528
  0.93920000   2.53374455
  0.93920000   1.98320893
  0.93920000   2.69312385
  0.93920000   1.64767461
  0.93920000   2.49859244
  0.93920000   2.05747806
  0.93920000   2.67582240
  0.93920000   1.68210898
  0.93920000   2.53363902
  0.93920000   1.98338891
  0.93920000   2.69309196
  0.93930000   1.64535958
  0.93930000   2.49734534
  0.93930000   2.06055083
  0.93930000   2.67556454
  0.93930000   1.68290119
  0.93930000   2.53561268
  0.93930000   1.97957666
  0.93930000   2.69437390
  0.93930000   1.64541354
  0.93930000   2.49738172
  0.93930000   2.06038424
  0.93930000   2.67558409
  0.93930000   1.68278862
  0.93930000   2.53548493
  0.93930000   1.97977949
  0.93930000   2.69433236
  0.93930000   1.64543870
  0.93930000   2.49739600
  0.93930000   2.06029960
  0.93930000   2.67558835
  0.93930000   1.68273429
  0.93930000   2.53542064
  0.93930000   1.97987196
  0.93930000   2.69430676
  0.93940000   1.64326579
  0.93940000   2.49628903
  0.93940000   2.06307930
  0.93940000   2.67541091
  0.93940000   1.68336497
  0.93940000   2.53723564
  0.93940000   1.97639193
  0.93940000   2.69552541
  0.93940000   1.64329236
  0.93940000   2.49629672
  0.93940000   2.06297312
  0.93940000   2.67540558
  0.93940000   1.68330275
  0.93940000   2.53715731
  0.93940000   1.97648987
  0.93940000   2.69548947
  0.93940000   1.64330700
  0.93940000   2.49630002
  0.93940000   2.06291157
  0.93940000   2.67540058
  0.93940000   1.68326717
  0.93940000   2.53711142
  0.93940000   1.97654329
  0.93940000   2.69546632
  0.93950000   1.64123764
  0.93950000   2.49529381
  0.93950000   2.06548084
  0.93950000   2.67527692
  0.93950000   1.68378988
  0.93950000   2.53882060
  0.93950000   1.97328374
  0.93950000   2.69663527
  0.93950000   1.64125604
  0.93950000   2.49529305
  0.93950000   2.06539259
  0.93950000   2.67526454
  0.93950000   1.68374201
  0.93950000   2.53875634
  0.93950000   1.97335191
  0.93950000   2.69660121
  0.93950000   1.64126716
  0.93950000   2.49529274
  0.93950000   2.06533870
  0.93950000   2.67525669
  0.93950000   1.68371223
  0.93950000   2.53871614
  0.93950000   1.97339335
  0.93950000   2.69657908
  0.93960000   1.63927580
  0.93960000   2.49436122
  0.93960000   2.06775220
  0.93960000   2.67516913
  0.93960000   1.68416253
  0.93960000   2.54035454
  0.93960000   1.97028013
  0.93960000   2.69770676
  0.93960000   1.63929767
  0.93960000   2.49436439
  0.93960000   2.06765590
  0.93960000   2.67516151
  0.93960000   1.68410516
  0.93960000   2.54028100
  0.93960000   1.97036828
  0.93960000   2.69767389
  0.93960000   1.63930638
  0.93960000   2.49436159
  0.93960000   2.06760726
  0.93960000   2.67515172
  0.93960000   1.68407935
  0.93960000   2.54024469
  0.93960000   1.97040154
  0.93960000   2.69765243
  0.93970000   1.63737746
  0.93970000   2.49348905
  0.93970000   2.06989794
  0.93970000   2.67509029
  0.93970000   1.68447730
  0.93970000   2.54183206
  0.93970000   1.96739294
  0.93970000   2.69874422
  0.93970000   1.63740837
  0.93970000   2.49350214
  0.93970000   2.06978103
  0.93970000   2.67509367
  0.93970000   1.68439775
  0.93970000   2.54173687
  0.93970000   1.96752752
  0.93970000   2.69871337
  0.93970000   1.63741284
  0.93970000   2.49349489
  0.93970000   2.06974177
  0.93970000   2.67507978
  0.93970000   1.68438030
  0.93970000   2.54170874
  0.93970000   1.96754344
  0.93970000   2.69869221
  0.93980000   1.63552415
  0.93980000   2.49265810
  0.93980000   2.07195822
  0.93980000   2.67502488
  0.93980000   1.68476542
  0.93980000   2.54328379
  0.93980000   1.96455711
  0.93980000   2.69975025
  0.93980000   1.63558319
  0.93980000   2.49270178
  0.93980000   2.07177745
  0.93980000   2.67506130
  0.93980000   1.68461916
  0.93980000   2.54312346
  0.93980000   1.96483111
  0.93980000   2.69972499
  0.93980000   1.63557582
  0.93980000   2.49268183
  0.93980000   2.07176482
  0.93980000   2.67503447
  0.93980000   1.68462793
  0.93980000   2.54312095
  0.93980000   1.96479239
  0.93980000   2.69970271
  0.93990000   1.63367057
  0.93990000   2.49181986
  0.93990000   2.07403452
  0.93990000   2.67492406
  0.93990000   1.68512571
  0.93990000   2.54480619
  0.93990000   1.96156656
  0.93990000   2.70071853
  0.93990000   1.63383570
  0.93990000   2.49197874
  0.93990000   2.07361285
  0.93990000   2.67508522
  0.93990000   1.68472708
  0.93990000   2.54439954
  0.93990000   1.96236753
  0.93990000   2.70071704
  0.93990000   1.63377820
  0.93990000   2.49190456
  0.93990000   2.07371380
  0.93990000   2.67500058
  0.93990000   1.68485292
  0.93990000   2.54451134
  0.93990000   1.96208447
  0.93990000   2.70068533
  0.94000000   1.63174752
  0.94000000   2.49089920
  0.94000000   2.07628420
  0.94000000   2.67470484
  0.94000000   1.68572633
  0.94000000   2.54656307
  0.94000000   1.95807066
  0.94000000   2.70162403
  0.94000000   1.63221741
  0.94000000   2.49138976
  0.94000000   2.07516830
  0.94000000   2.67523221
  0.94000000   1.68458624
  0.94000000   2.54543298
  0.94000000   1.96041995
  0.94000000   2.70170967
  0.94000000   1.63197830
  0.94000000   2.49111828
  0.94000000   2.07568248
  0.94000000   2.67493176
  0.94000000   1.68514910
  0.94000000   2.54597152
  0.94000000   1.95922393
  0.94000000   2.70163189
  0.94010000   1.62970008
  0.94010000   2.48983542
  0.94010000   2.07883423
  0.94010000   2.67429211
  0.94010000   1.68671980
  0.94010000   2.54870185
  0.94010000   1.95375274
  0.94010000   2.70242085
  0.94010000   1.63082081
  0.94010000   2.49103670
  0.94010000   2.07623002
  0.94010000   2.67562234
  0.94010000   1.68395341
  0.94010000   2.54598548
  0.94010000   1.95949934
  0.94010000   2.70274042
  0.94010000   1.63009886
  0.94010000   2.49023880
  0.94010000   2.07784724
  0.94010000   2.67473331
  0.94010000   1.68570836
  0.94010000   2.54768845
  0.94010000   1.95581029
  0.94010000   2.70251132
  0.94020000   1.62758589
  0.94020000   2.48868998
  0.94020000   2.08155535
  0.94020000   2.67374418
  0.94020000   1.68798852
  0.94020000   2.55110598
  0.94020000   1.94886095
  0.94020000   2.70308709
  0.94020000   1.62968730
  0.94020000   2.49096654
  0.94020000   2.07669873
  0.94020000   2.67631806
  0.94020000   1.68270227
  0.94020000   2.54593084
  0.94020000   1.95987754
  0.94020000   2.70383198
  0.94020000   1.62809369
  0.94020000   2.48921479
  0.94020000   2.08031564
  0.94020000   2.67433899
  0.94020000   1.68666534
  0.94020000   2.54979219
  0.94020000   1.95156392
  0.94020000   2.70327645
  0.94030000   1.62574354
  0.94030000   2.48783355
  0.94030000   2.08367005
  0.94030000   2.67349406
  0.94030000   1.68865376
  0.94030000   2.55292303
  0.94030000   1.94522177
  0.94030000   2.70379678
  0.94030000   1.62846132
  0.94030000   2.49079269
  0.94030000   2.07738473
  0.94030000   2.67689556
  0.94030000   1.68169076
  0.94030000   2.54610866
  0.94030000   1.95975783
  0.94030000   2.70490048
  0.94030000   1.62613941
  0.94030000   2.48823864
  0.94030000   2.08268491
  0.94030000   2.67396228
  0.94030000   1.68758778
  0.94030000   2.55186092
  0.94030000   1.94738756
  0.94030000   2.70397493
  0.94040000   1.62499335
  0.94040000   2.48817095
  0.94040000   2.08327994
  0.94040000   2.67464528
  0.94040000   1.68647485
  0.94040000   2.55198009
  0.94040000   1.94749787
  0.94040000   2.70512205
  0.94040000   1.62598482
  0.94040000   2.48924490
  0.94040000   2.08095418
  0.94040000   2.67589538
  0.94040000   1.68387274
  0.94040000   2.54942269
  0.94040000   1.95291516
  0.94040000   2.70556552
  0.94040000   1.62502286
  0.94040000   2.48817672
  0.94040000   2.08314031
  0.94040000   2.67464025
  0.94040000   1.68637160
  0.94040000   2.55185143
  0.94040000   1.94766376
  0.94040000   2.70508743
  0.94050000   1.62674413
  0.94050000   2.49125287
  0.94050000   2.07711941
  0.94050000   2.67896544
  0.94050000   1.67788466
  0.94050000   2.54470788
  0.94050000   1.96334756
  0.94050000   2.70720621
  0.94050000   1.62193712
  0.94050000   2.48595024
  0.94050000   2.08818285
  0.94050000   2.67268807
  0.94050000   1.69053850
  0.94050000   2.55707305
  0.94050000   1.93675753
  0.94050000   2.70485702
  0.94050000   1.62667451
  0.94050000   2.49115390
  0.94050000   2.07721395
  0.94050000   2.67883617
  0.94050000   1.67803623
  0.94050000   2.54483127
  0.94050000   1.96297450
  0.94050000   2.70714331
  0.94060000   1.63277583
  0.94060000   2.49899044
  0.94060000   2.06111402
  0.94060000   2.68781899
  0.94060000   1.66023089
  0.94060000   2.52802018
  0.94060000   1.99933730
  0.94060000   2.70617019
  0.94060000   1.62393481
  0.94060000   2.48931126
  0.94060000   2.08143381
  0.94060000   2.67749293
  0.94060000   1.68094745
  0.94060000   2.54889320
  0.94060000   1.95456399
  0.94060000   2.70784058
  0.94060000   1.62084008
  0.94060000   2.48588926
  0.94060000   2.08858569
  0.94060000   2.67334175
  0.94060000   1.68932555
  0.94060000   2.55706435
  0.94060000   1.93698367
  0.94060000   2.70596421
  0.94070000   1.64445426
  0.94070000   2.51269254
  0.94070000   2.03235830
  0.94070000   2.69974918
  0.94070000   1.63667278
  0.94070000   2.50435630
  0.94070000   2.05001087
  0.94070000   2.69348482
  0.94070000   1.64903605
  0.94070000   2.51751791
  0.94070000   2.02199511
  0.94070000   2.70263067
  0.94070000   1.63093794
  0.94070000   2.49813217
  0.94070000   2.06311857
  0.94070000   2.68778864
  0.94070000   1.66034755
  0.94070000   2.52928863
  0.94070000   1.99681098
  0.94070000   2.70751001
  0.94070000   1.62138981
  0.94070000   2.48765043
  0.94070000   2.08517342
  0.94070000   2.67625385
  0.94080000   1.66139873
  0.94080000   2.53157598
  0.94080000   1.99233592
  0.94080000   2.70917499
  0.94080000   1.61840984
  0.94080000   2.48553371
  0.94080000   2.09005799
  0.94080000   2.67436012
  0.94080000   1.68764914
  0.94080000   2.55780649
  0.94080000   1.93596204
  0.94080000   2.70803679
  0.94080000   1.62090172
  0.94080000   2.48829049
  0.94080000   2.08422187
  0.94080000   2.67777012
  0.94080000   1.68068472
  0.94080000   2.55097589
  0.94080000   1.95058679
  0.94080000   2.70969745
  0.94080000   1.61750629
  0.94080000   2.48451026
  0.94080000   2.09211400
  0.94080000   2.67303962
  0.94090000   1.68027328
  0.94090000   2.55177909
  0.94090000   1.94925622
  0.94090000   2.71073303
  0.94090000   1.61574992
  0.94090000   2.48373803
  0.94090000   2.09417327
  0.94090000   2.67274895
  0.94090000   1.69109003
  0.94090000   2.56231024
  0.94090000   1.92653107
  0.94090000   2.70755210
  0.94090000   1.62207123
  0.94090000   2.49074901
  0.94090000   2.07937204
  0.94090000   2.68143900
  0.94090000   1.67342966
  0.94090000   2.54493276
  0.94090000   1.96382524
  0.94090000   2.71145982
  0.94090000   1.61412820
  0.94090000   2.48189982
  0.94090000   2.09791188
  0.94090000   2.67029117
  0.94100000   1.69499608
  0.94100000   2.56725447
  0.94100000   1.91622860
  0.94100000   2.70653250
  0.94100000   1.62437134
  0.94100000   2.49446697
  0.94100000   2.07191706
  0.94100000   2.68639815
  0.94100000   1.66366296
  0.94100000   2.53622239
  0.94100000   1.98284022
  0.94100000   2.71209252
  0.94100000   1.61298262
  0.94100000   2.48178482
  0.94100000   2.09851830
  0.94100000   2.67083498
  0.94100000   1.69509106
  0.94100000   2.56730726
  0.94100000   1.91597387
  0.94100000   2.70641283
  0.94100000   1.62449493
  0.94100000   2.49457890
  0.94100000   2.07156911
  0.94100000   2.68650845
  0.94110000   1.69921761
  0.94110000   2.57243957
  0.94110000   1.90531515
  0.94110000   2.70487038
  0.94110000   1.62788005
  0.94110000   2.49948714
  0.94110000   2.06161282
  0.94110000   2.69238772
  0.94110000   1.65183541
  0.94110000   2.52513979
  0.94110000   2.00686470
  0.94110000   2.71006609
  0.94110000   1.61698578
  0.94110000   2.48742131
  0.94110000   2.08698938
  0.94110000   2.67893314
  0.94110000   1.67879997
  0.94110000   2.55263383
  0.94110000   1.94778713
  0.94110000   2.71270555
  0.94110000   1.61209194
  0.94110000   2.48194170
  0.94110000   2.09848963
  0.94110000   2.67174130
  0.94120000   1.69004020
  0.94120000   2.56484825
  0.94120000   1.92189445
  0.94120000   2.70999153
  0.94120000   1.61784113
  0.94120000   2.48956297
  0.94120000   2.08290280
  0.94120000   2.68230346
  0.94120000   1.67221383
  0.94120000   2.54724660
  0.94120000   1.95968931
  0.94120000   2.71458624
  0.94120000   1.60854801
  0.94120000   2.47911799
  0.94120000   2.10478323
  0.94120000   2.66845657
  0.94120000   1.70027603
  0.94120000   2.57457641
  0.94120000   1.90081368
  0.94120000   2.70464493
  0.94120000   1.62839790
  0.94120000   2.50119646
  0.94120000   2.05818726
  0.94120000   2.69484283
  0.94130000   1.67026315
  0.94130000   2.54647697
  0.94130000   1.96169327
  0.94130000   2.71576771
  0.94130000   1.60645698
  0.94130000   2.47792614
  0.94130000   2.10768194
  0.94130000   2.66738466
  0.94130000   1.70268922
  0.94130000   2.57803455
  0.94130000   1.89365994
  0.94130000   2.70357890
  0.94130000   1.63075523
  0.94130000   2.50494865
  0.94130000   2.05056910
  0.94130000   2.69909800
  0.94130000   1.63875643
  0.94130000   2.51358430
  0.94130000   2.03208601
  0.94130000   2.70574995
  0.94130000   1.62562901
  0.94130000   2.49930866
  0.94130000   2.06244345
  0.94130000   2.69384100
  0.94140000   1.64698235
  0.94140000   2.52356088
  0.94140000   2.01118089
  0.94140000   2.71233245
  0.94140000   1.61306121
  0.94140000   2.48653481
  0.94140000   2.08989395
  0.94140000   2.68000108
  0.94140000   1.67717193
  0.94140000   2.55455593
  0.94140000   1.94446490
  0.94140000   2.71566586
  0.94140000   1.60684006
  0.94140000   2.47950961
  0.94140000   2.10463261
  0.94140000   2.67036756
  0.94140000   1.69670122
  0.94140000   2.57354786
  0.94140000   1.90350062
  0.94140000   2.70766288
  0.94140000   1.62273810
  0.94140000   2.49730423
  0.94140000   2.06706037
  0.94140000   2.69258950
  0.94150000   1.62728353
  0.94150000   2.50349585
  0.94150000   2.05432763
  0.94150000   2.69952374
  0.94150000   1.63829472
  0.94150000   2.51544576
  0.94150000   2.02878107
  0.94150000   2.70881848
  0.94150000   1.61998715
  0.94150000   2.49542219
  0.94150000   2.07138010
  0.94150000   2.69138228
  0.94150000   1.65441056
  0.94150000   2.53251152
  0.94150000   1.99213146
  0.94150000   2.71644508
  0.94150000   1.60518777
  0.94150000   2.47878517
  0.94150000   2.10644071
  0.94150000   2.66998969
  0.94150000   1.69761127
  0.94150000   2.57558363
  0.94150000   1.89932979
  0.94150000   2.70756342
  0.94160000   1.61459388
  0.94160000   2.49059348
  0.94160000   2.08201992
  0.94160000   2.68656913
  0.94160000   1.66428721
  0.94160000   2.54391099
  0.94160000   1.96794867
  0.94160000   2.71902762
  0.94160000   1.60050837
  0.94160000   2.47462173
  0.94160000   2.11557348
  0.94160000   2.66430279
  0.94160000   1.70947382
  0.94160000   2.58785836
  0.94160000   1.87318115
  0.94160000   2.69951742
  0.94160000   1.63940452
  0.94160000   2.51781348
  0.94160000   2.02399430
  0.94160000   2.71117788
  0.94160000   1.61547947
  0.94160000   2.49155021
  0.94160000   2.07983325
  0.94160000   2.68771254
  0.94170000   1.60869301
  0.94170000   2.48511502
  0.94170000   2.09391977
  0.94170000   2.68028199
  0.94170000   1.67712648
  0.94170000   2.55804976
  0.94170000   1.93772822
  0.94170000   2.71816145
  0.94170000   1.60252113
  0.94170000   2.47808808
  0.94170000   2.10865102
  0.94170000   2.67026746
  0.94170000   1.69742496
  0.94170000   2.57777605
  0.94170000   1.89512114
  0.94170000   2.70854066
  0.94170000   1.62155537
  0.94170000   2.49949997
  0.94170000   2.06335395
  0.94170000   2.69728163
  0.94170000   1.64293873
  0.94170000   2.52273901
  0.94170000   2.01363140
  0.94170000   2.71477619
  0.94180000   1.60903473
  0.94180000   2.48666469
  0.94180000   2.09097038
  0.94180000   2.68306307
  0.94180000   1.67166527
  0.94180000   2.55375562
  0.94180000   1.94724338
  0.94180000   2.72030804
  0.94180000   1.59845493
  0.94180000   2.47459027
  0.94180000   2.11632502
  0.94180000   2.66551327
  0.94180000   1.70732575
  0.94180000   2.58823501
  0.94180000   1.87282261
  0.94180000   2.70165284
  0.94180000   1.63548003
  0.94180000   2.51592323
  0.94180000   2.02862132
  0.94180000   2.71184812
  0.94180000   1.61445987
  0.94180000   2.49273805
  0.94180000   2.07795045
  0.94180000   2.69064530
  0.94190000   1.61848325
  0.94190000   2.49843475
  0.94190000   2.06632459
  0.94190000   2.69781771
  0.94190000   1.64228178
  0.94190000   2.52440489
  0.94190000   2.01072753
  0.94190000   2.71752190
  0.94190000   1.60368069
  0.94190000   2.48172753
  0.94190000   2.10162266
  0.94190000   2.67696715
  0.94190000   1.68409434
  0.94190000   2.56727083
  0.94190000   1.91825189
  0.94190000   2.71693405
  0.94190000   1.60528505
  0.94190000   2.48355453
  0.94190000   2.09775603
  0.94190000   2.67953972
  0.94190000   1.67884089
  0.94190000   2.56208058
  0.94190000   1.92941732
  0.94190000   2.71906162
  0.94200000   1.64331348
  0.94200000   2.52669236
  0.94200000   2.00614733
  0.94200000   2.71951124
  0.94200000   1.60003709
  0.94200000   2.47873137
  0.94200000   2.10830700
  0.94200000   2.67322195
  0.94200000   1.69191175
  0.94200000   2.57605072
  0.94200000   1.89957016
  0.94200000   2.71328555
  0.94200000   1.61270691
  0.94200000   2.49312322
  0.94200000   2.07785798
  0.94200000   2.69261936
  0.94200000   1.65270406
  0.94200000   2.53659065
  0.94200000   1.98469627
  0.94200000   2.72245005
  0.94200000   1.59434476
  0.94200000   2.47215436
  0.94200000   2.12202278
  0.94200000   2.66282003
  0.94210000   1.68448980
  0.94210000   2.57004821
  0.94210000   1.91285801
  0.94210000   2.71798669
  0.94210000   1.60367845
  0.94210000   2.48407096
  0.94210000   2.09741484
  0.94210000   2.68165304
  0.94210000   1.67496192
  0.94210000   2.56058993
  0.94210000   1.93320444
  0.94210000   2.72189854
  0.94210000   1.59589889
  0.94210000   2.47512550
  0.94210000   2.11619167
  0.94210000   2.66825532
  0.94210000   1.70218099
  0.94210000   2.58697539
  0.94210000   1.87619024
  0.94210000   2.70639731
  0.94210000   1.62651878
  0.94210000   2.50965111
  0.94210000   2.04290724
  0.94210000   2.70994811
  0.94220000   1.72153545
  0.94220000   2.60588866
  0.94220000   1.83587341
  0.94220000   2.68882419
  0.94220000   1.66214188
  0.94220000   2.54880447
  0.94220000   1.95906553
  0.94220000   2.72537606
  0.94220000   1.58925156
  0.94220000   2.46858040
  0.94220000   2.13029207
  0.94220000   2.65790873
  0.94220000   1.72367358
  0.94220000   2.60775186
  0.94220000   1.83176610
  0.94220000   2.68653600
  0.94220000   1.66669581
  0.94220000   2.55344757
  0.94220000   1.94894684
  0.94220000   2.72478264
  0.94220000   1.59038066
  0.94220000   2.46988242
  0.94220000   2.12749765
  0.94220000   2.66017327
  0.94230000   1.71313361
  0.94230000   2.59950306
  0.94230000   1.84980014
  0.94230000   2.69714784
  0.94230000   1.64550117
  0.94230000   2.53256263
  0.94230000   1.99437920
  0.94230000   2.72456711
  0.94230000   1.59077571
  0.94230000   2.47151156
  0.94230000   2.12447331
  0.94230000   2.66354612
  0.94230000   1.71221008
  0.94230000   2.59862794
  0.94230000   1.85156918
  0.94230000   2.69796504
  0.94230000   1.64376472
  0.94230000   2.53069149
  0.94230000   1.99832153
  0.94230000   2.72393565
  0.94230000   1.59190115
  0.94230000   2.47280505
  0.94230000   2.12168280
  0.94230000   2.66572524
  0.94240000   1.64526605
  0.94240000   2.53346533
  0.94240000   1.99265556
  0.94240000   2.72584403
  0.94240000   1.58849884
  0.94240000   2.47002323
  0.94240000   2.12796648
  0.94240000   2.66158744
  0.94240000   1.71644110
  0.94240000   2.60365893
  0.94240000   1.84099794
  0.94240000   2.69382741
  0.94240000   1.65229820
  0.94240000   2.54090650
  0.94240000   1.97657912
  0.94240000   2.72729048
  0.94240000   1.58573733
  0.94240000   2.46677891
  0.94240000   2.13469408
  0.94240000   2.65585991
  0.94240000   1.72821119
  0.94240000   2.61408673
  0.94240000   1.81857440
  0.94240000   2.68123096
  0.94250000   1.58533757
  0.94250000   2.46749422
  0.94250000   2.13366818
  0.94250000   2.65769047
  0.94250000   1.72470466
  0.94250000   2.61222483
  0.94250000   1.82287299
  0.94250000   2.68497893
  0.94250000   1.67045158
  0.94250000   2.56081135
  0.94250000   1.93383131
  0.94250000   2.72641575
  0.94250000   1.58784034
  0.94250000   2.47041028
  0.94250000   2.12746976
  0.94250000   2.66283634
  0.94250000   1.71399464
  0.94250000   2.60261223
  0.94250000   1.84341682
  0.94250000   2.69621575
  0.94250000   1.64761989
  0.94250000   2.53713780
  0.94250000   1.98494515
  0.94250000   2.72770774
  0.94260000   1.61277177
  0.94260000   2.50022589
  0.94260000   2.06473116
  0.94260000   2.70533335
  0.94260000   1.62851020
  0.94260000   2.51769429
  0.94260000   2.02715525
  0.94260000   2.72036820
  0.94260000   1.59918575
  0.94260000   2.48472300
  0.94260000   2.09757763
  0.94260000   2.68607246
  0.94260000   1.66680106
  0.94260000   2.55822955
  0.94260000   1.93951813
  0.94260000   2.72821519
  0.94260000   1.58445909
  0.94260000   2.46759923
  0.94260000   2.13367372
  0.94260000   2.65845520
  0.94260000   1.72318311
  0.94260000   2.61203153
  0.94260000   1.82339042
  0.94260000   2.68640859
  0.94270000   1.69153374
  0.94270000   2.58403447
  0.94270000   1.88417358
  0.94270000   2.71626711
  0.94270000   1.60818765
  0.94270000   2.49620285
  0.94270000   2.07359452
  0.94270000   2.70163473
  0.94270000   1.63593138
  0.94270000   2.52694955
  0.94270000   2.00746657
  0.94270000   2.72641132
  0.94270000   1.58774837
  0.94270000   2.47261445
  0.94270000   2.12347605
  0.94270000   2.66782414
  0.94270000   1.70406427
  0.94270000   2.59582594
  0.94270000   1.85845191
  0.94270000   2.70578444
  0.94270000   1.62880330
  0.94270000   2.51918934
  0.94270000   2.02420005
  0.94270000   2.72221838
  0.94280000   1.71282038
  0.94280000   2.60520177
  0.94280000   1.83877426
  0.94280000   2.69735227
  0.94280000   1.64601205
  0.94280000   2.53899035
  0.94280000   1.98187428
  0.94280000   2.73120906
  0.94280000   1.57890549
  0.94280000   2.46337649
  0.94280000   2.14327163
  0.94280000   2.65170784
  0.94280000   1.73757910
  0.94280000   2.62688308
  0.94280000   1.79211737
  0.94280000   2.66890151
  0.94280000   1.70394706
  0.94280000   2.59696662
  0.94280000   1.85635798
  0.94280000   2.70600167
  0.94280000   1.62858433
  0.94280000   2.52012675
  0.94280000   2.02248679
  0.94280000   2.72373046
  0.94290000   1.63250199
  0.94290000   2.52561951
  0.94290000   2.01107349
  0.94290000   2.72775148
  0.94290000   1.58556253
  0.94290000   2.47239052
  0.94290000   2.12470168
  0.94290000   2.66862766
  0.94290000   1.70281093
  0.94290000   2.59703504
  0.94290000   1.85633907
  0.94290000   2.70713940
  0.94290000   1.62650409
  0.94290000   2.51901680
  0.94290000   2.02519156
  0.94290000   2.72397041
  0.94290000   1.59267513
  0.94290000   2.48067886
  0.94290000   2.10708873
  0.94290000   2.68213153
  0.94290000   1.67520702
  0.94290000   2.57025289
  0.94290000   1.91417057
  0.94290000   2.72715044
  0.94300000   1.57773836
  0.94300000   2.46432347
  0.94300000   2.14205704
  0.94300000   2.65455671
  0.94300000   1.73207190
  0.94300000   2.62456218
  0.94300000   1.79752602
  0.94300000   2.67493460
  0.94300000   1.69191548
  0.94300000   2.58792782
  0.94300000   1.87635704
  0.94300000   2.71676986
  0.94300000   1.60766631
  0.94300000   2.49910095
  0.94300000   2.06827040
  0.94300000   2.70729107
  0.94300000   1.62519066
  0.94300000   2.51871022
  0.94300000   2.02603447
  0.94300000   2.72469081
  0.94300000   1.59140689
  0.94300000   2.48036134
  0.94300000   2.10806556
  0.94310000   1.71570625
  0.94310000   2.61130363
  0.94310000   1.82615743
  0.94310000   2.69388611
  0.94310000   1.65349283
  0.94310000   2.55042243
  0.94310000   1.95788807
  0.94310000   2.73505805
  0.94310000   1.57218203
  0.94310000   2.45884950
  0.94310000   2.15381037
  0.94310000   2.64430567
  0.94310000   1.75356226
  0.94310000   2.64361284
  0.94310000   1.75723459
  0.94310000   2.64662116
  0.94310000   1.75101413
  0.94310000   2.64164985
  0.94310000   1.76151857
  0.94310000   2.65000232
  0.94310000   1.74392601
  0.94310000   2.63583859
  0.94310000   1.77381552
  0.94320000   1.69532847
  0.94320000   2.59353482
  0.94320000   1.86464733
  0.94320000   2.71432067
  0.94320000   1.61288525
  0.94320000   2.50736194
  0.94320000   2.05122234
  0.94320000   2.71742990
  0.94320000   1.60576575
  0.94320000   2.49925806
  0.94320000   2.06849928
  0.94320000   2.70907287
  0.94320000   1.62200568
  0.94320000   2.51753055
  0.94320000   2.02916873
  0.94320000   2.72573047
  0.94320000   1.58972571
  0.94320000   2.48073089
  0.94320000   2.10795763
  0.94320000   2.68419091
  0.94320000   1.67152542
  0.94320000   2.57009450
  0.94320000   1.91523000
  0.94330000   1.59588146
  0.94330000   2.48910594
  0.94330000   2.09069115
  0.94330000   2.69711520
  0.94330000   1.64589008
  0.94330000   2.54470941
  0.94330000   1.97069640
  0.94330000   2.73715038
  0.94330000   1.56845086
  0.94330000   2.45668595
  0.94330000   2.15903406
  0.94330000   2.64080224
  0.94330000   1.76126530
  0.94330000   2.65206772
  0.94330000   1.73982006
  0.94330000   2.63476249
  0.94330000   1.77646927
  0.94330000   2.66368280
  0.94330000   1.71570295
  0.94330000   2.61370683
  0.94330000   1.82143307
  0.94330000   2.69345876
  0.94330000   1.65463074
  0.94340000   2.06063244
  0.94340000   2.71508277
  0.94340000   1.61069603
  0.94340000   2.50721331
  0.94340000   2.05209096
  0.94340000   2.71899556
  0.94340000   1.60304315
  0.94340000   2.49848510
  0.94340000   2.07078595
  0.94340000   2.70976735
  0.94340000   1.62096631
  0.94340000   2.51872333
  0.94340000   2.02718321
  0.94340000   2.72838330
  0.94340000   1.58497333
  0.94340000   2.47748914
  0.94340000   2.11551026
  0.94340000   2.68028612
  0.94340000   1.67977365
  0.94340000   2.58071635
  0.94340000   1.89267799
  0.94340000   2.72695933
  0.94340000   1.58839222
  0.94350000   2.07967757
  0.94350000   2.70575809
  0.94350000   1.62908317
  0.94350000   2.52889020
  0.94350000   2.00554942
  0.94350000   2.73508665
  0.94350000   1.57251653
  0.94350000   2.46388010
  0.94350000   2.14466242
  0.94350000   2.65633664
  0.94350000   1.72919246
  0.94350000   2.62797638
  0.94350000   1.79119757
  0.94350000   2.67650576
  0.94350000   1.68954241
  0.94350000   2.59154533
  0.94350000   1.86961950
  0.94350000   2.71981208
  0.94350000   1.60255560
  0.94350000   2.49910222
  0.94350000   2.06978211
  0.94350000   2.71123941
  0.94350000   1.61819891
  0.94360000   1.75526573
  0.94360000   2.65101576
  0.94360000   1.74284567
  0.94360000   2.64089855
  0.94360000   1.76418429
  0.94360000   2.65801538
  0.94360000   1.72817254
  0.94360000   2.62837831
  0.94360000   1.79075317
  0.94360000   2.67741617
  0.94360000   1.68793141
  0.94360000   2.59118111
  0.94360000   1.87068229
  0.94360000   2.72140631
  0.94360000   1.59965056
  0.94360000   2.49693728
  0.94360000   2.07476634
  0.94360000   2.70946233
  0.94360000   1.62185757
  0.94360000   2.52205592
  0.94360000   2.02051817
  0.94360000   2.73238101
  0.94360000   1.57766004
  0.94370000   1.74650746
  0.94370000   2.64510657
  0.94370000   1.75547666
  0.94370000   2.65237465
  0.94370000   1.74018433
  0.94370000   2.63985607
  0.94370000   1.76657377
  0.94370000   2.66102799
  0.94370000   1.72205562
  0.94370000   2.62417306
  0.94370000   1.79991589
  0.94370000   2.68476274
  0.94370000   1.67305692
  0.94370000   2.57762742
  0.94370000   1.90027262
  0.94370000   2.73265849
  0.94370000   1.57799671
  0.94370000   2.47274167
  0.94370000   2.12665049
  0.94370000   2.67395533
  0.94370000   1.69319090
  0.94370000   2.59736972
  0.94370000   1.85731097
  0.94380000   2.04425522
  0.94380000   2.72628178
  0.94380000   1.58967810
  0.94380000   2.48768686
  0.94380000   2.09520413
  0.94380000   2.69869081
  0.94380000   1.64350039
  0.94380000   2.54804406
  0.94380000   1.96471732
  0.94380000   2.74262805
  0.94380000   1.55895448
  0.94380000   2.45096563
  0.94380000   2.17277075
  0.94380000   2.63055787
  0.94380000   1.78376966
  0.94380000   2.67473328
  0.94380000   1.69357150
  0.94380000   2.59897260
  0.94380000   1.85417805
  0.94380000   2.71651566
  0.94380000   1.60953180
  0.94380000   2.51057358
  0.94380000   2.04599188
  0.94390000   2.15806306
  0.94390000   2.64679207
  0.94390000   1.74989689
  0.94390000   2.65015420
  0.94390000   1.74506205
  0.94390000   2.64627142
  0.94390000   1.75335469
  0.94390000   2.65303432
  0.94390000   1.73913612
  0.94390000   2.64133568
  0.94390000   1.76379349
  0.94390000   2.66124961
  0.94390000   1.72193356
  0.94390000   2.62643082
  0.94390000   1.79546854
  0.94390000   2.68414596
  0.94390000   1.67464979
  0.94390000   2.58159365
  0.94390000   1.89210632
  0.94390000   2.73248611
  0.94390000   1.57867786
  0.94390000   2.47587381
  0.94390000   2.12066666
  0.94400000   1.86218664
  0.94400000   2.72249611
  0.94400000   1.59832861
  0.94400000   2.50010826
  0.94400000   2.06928910
  0.94400000   2.71635020
  0.94400000   1.60911357
  0.94400000   2.51243727
  0.94400000   2.04255753
  0.94400000   2.72889108
  0.94400000   1.58493333
  0.94400000   2.48443260
  0.94400000   2.10273348
  0.94400000   2.69522661
  0.94400000   1.65067260
  0.94400000   2.55801641
  0.94400000   1.94346806
  0.94400000   2.74395187
  0.94400000   1.55687045
  0.94400000   2.45072611
  0.94400000   2.17396740
  0.94400000   2.63082560
  0.94400000   1.78354471
  0.94410000   1.61068463
  0.94410000   2.51543598
  0.94410000   2.03652578
  0.94410000   2.73228104
  0.94410000   1.57872144
  0.94410000   2.47825688
  0.94410000   2.11629883
  0.94410000   2.68593612
  0.94410000   1.66955345
  0.94410000   2.57876783
  0.94410000   1.89859764
  0.94410000   2.73667876
  0.94410000   1.57099706
  0.94410000   2.46902130
  0.94410000   2.13589531
  0.94410000   2.66940820
  0.94410000   1.70319692
  0.94410000   2.61160964
  0.94410000   1.82746267
  0.94410000   2.70624365
  0.94410000   1.63036377
  0.94410000   2.53736191
  0.94410000   1.98877396
  0.94420000   1.55758505
  0.94420000   2.45394377
  0.94420000   2.16812750
  0.94420000   2.63881733
  0.94420000   1.76717176
  0.94420000   2.66728539
  0.94420000   1.70978594
  0.94420000   2.61899391
  0.94420000   1.81198509
  0.94420000   2.69832734
  0.94420000   1.64646092
  0.94420000   2.55596772
  0.94420000   1.94859478
  0.94420000   2.74656471
  0.94420000   1.55235093
  0.94420000   2.44750013
  0.94420000   2.18147261
  0.94420000   2.62411502
  0.94420000   1.79818991
  0.94420000   2.68933667
  0.94420000   1.66439316
  0.94420000   2.57470393
  0.94420000   1.90769508
  0.94430000   1.56580801
  0.94430000   2.46510873
  0.94430000   2.14498700
  0.94430000   2.66284177
  0.94430000   1.71717690
  0.94430000   2.62685599
  0.94430000   1.79525185
  0.94430000   2.68870645
  0.94430000   1.66607888
  0.94430000   2.57765034
  0.94430000   1.90163191
  0.94430000   2.73980765
  0.94430000   1.56543018
  0.94430000   2.46463094
  0.94430000   2.14589089
  0.94430000   2.66191023
  0.94430000   1.71901537
  0.94430000   2.62848276
  0.94430000   1.79169326
  0.94430000   2.68626536
  0.94430000   1.67097567
  0.94430000   2.58261957
  0.94430000   1.89075955
  0.94440000   1.69274032
  0.94440000   2.60535819
  0.94440000   1.84187143
  0.94440000   2.71753856
  0.94440000   1.60871665
  0.94440000   2.51671343
  0.94440000   2.03459214
  0.94440000   2.73596487
  0.94440000   1.57219299
  0.94440000   2.47394038
  0.94440000   2.12646143
  0.94440000   2.68022336
  0.94440000   1.68160724
  0.94440000   2.59439709
  0.94440000   1.86531962
  0.94440000   2.72835587
  0.94440000   1.58752004
  0.94440000   2.49215543
  0.94440000   2.08750999
  0.94440000   2.70925248
  0.94440000   1.62351242
  0.94440000   2.53329861
  0.94440000   1.99832286
  0.94450000   2.04096047
  0.94450000   2.73456194
  0.94450000   1.57503716
  0.94450000   2.47852236
  0.94450000   2.11707985
  0.94450000   2.68887153
  0.94450000   1.66430581
  0.94450000   2.57815346
  0.94450000   1.90088254
  0.94450000   2.74184128
  0.94450000   1.56191920
  0.94450000   2.46268744
  0.94450000   2.15069684
  0.94450000   2.65896110
  0.94450000   1.72548352
  0.94450000   2.63660258
  0.94450000   1.77479135
  0.94450000   2.67661789
  0.94450000   1.69110197
  0.94450000   2.60492231
  0.94450000   1.84287199
  0.94450000   2.71915161
  0.94450000   1.60561066
  0.94460000   2.18024186
  0.94460000   2.62874366
  0.94460000   1.78924459
  0.94460000   2.68804334
  0.94460000   1.66784254
  0.94460000   2.58300630
  0.94460000   1.89066998
  0.94460000   2.73999987
  0.94460000   1.56563374
  0.94460000   2.46836455
  0.94460000   2.13904609
  0.94460000   2.67085119
  0.94460000   1.70111478
  0.94460000   2.61560486
  0.94460000   1.81993330
  0.94460000   2.70777239
  0.94460000   1.62822631
  0.94460000   2.54091185
  0.94460000   1.98240161
  0.94460000   2.75015660
  0.94460000   1.54614370
  0.94460000   2.44443901
  0.94460000   2.18929776
  0.94470000   1.84636932
  0.94470000   2.72325411
  0.94470000   1.59805796
  0.94470000   2.50798937
  0.94470000   2.05438233
  0.94470000   2.73064498
  0.94470000   1.58272072
  0.94470000   2.48999129
  0.94470000   2.09310785
  0.94470000   2.70835484
  0.94470000   1.62579440
  0.94470000   2.53937528
  0.94470000   1.98593628
  0.94470000   2.75080278
  0.94470000   1.54509950
  0.94470000   2.44429853
  0.94470000   2.18997978
  0.94470000   2.61816770
  0.94470000   1.81182942
  0.94470000   2.70392124
  0.94470000   1.63589006
  0.94470000   2.55046720
  0.94470000   1.96174944
  0.94480000   1.61083691
  0.94480000   2.52381857
  0.94480000   2.02028014
  0.94480000   2.74473419
  0.94480000   1.55644498
  0.94480000   2.45947645
  0.94480000   2.15854157
  0.94480000   2.65362450
  0.94480000   1.73715428
  0.94480000   2.65025282
  0.94480000   1.74650265
  0.94480000   2.65813179
  0.94480000   1.73007473
  0.94480000   2.64427408
  0.94480000   1.75927367
  0.94480000   2.66839719
  0.94480000   1.70869406
  0.94480000   2.62512919
  0.94480000   1.80004481
  0.94480000   2.69778217
  0.94480000   1.64858864
  0.94480000   2.56532329
  0.94480000   1.92964139
  0.94490000   1.70659974
  0.94490000   2.62439854
  0.94490000   1.80189190
  0.94490000   2.70019890
  0.94490000   1.64399837
  0.94490000   2.56163289
  0.94490000   1.93803868
  0.94490000   2.75338837
  0.94490000   1.54098839
  0.94490000   2.44149743
  0.94490000   2.19665329
  0.94490000   2.61175780
  0.94490000   1.82599691
  0.94490000   2.71463180
  0.94490000   1.61503325
  0.94490000   2.52972027
  0.94490000   2.00758389
  0.94490000   2.74905185
  0.94490000   1.54855677
  0.94490000   2.45089440
  0.94490000   2.17688867
  0.94490000   2.63474176
  0.94490000   1.77695306
  0.94500000   2.12243570
  0.94500000   2.68893366
  0.94500000   1.66505324
  0.94500000   2.58486627
  0.94500000   1.88746206
  0.94500000   2.74351752
  0.94500000   1.55970872
  0.94500000   2.46580044
  0.94500000   2.14588598
  0.94500000   2.66782879
  0.94500000   1.70803699
  0.94500000   2.62682890
  0.94500000   1.79666941
  0.94500000   2.69789703
  0.94500000   1.64869575
  0.94500000   2.56780821
  0.94500000   1.92470987
  0.94500000   2.75266480
  0.94500000   1.54249330
  0.94500000   2.44452020
  0.94500000   2.19066247
  0.94500000   2.61967187
  0.94500000   1.80920800
  0.94510000   2.08397684
  0.94510000   2.71814432
  0.94510000   1.60741266
  0.94510000   2.52342706
  0.94510000   2.02190718
  0.94510000   2.74727027
  0.94510000   1.55219645
  0.94510000   2.45772251
  0.94510000   2.16329894
  0.94510000   2.65113427
  0.94510000   1.74288472
  0.94510000   2.65862534
  0.94510000   1.72946476
  0.94510000   2.64730294
  0.94510000   1.75341357
  0.94510000   2.66731483
  0.94510000   1.71148384
  0.94510000   2.63126795
  0.94510000   1.78751221
  0.94510000   2.69285988
  0.94510000   1.65905637
  0.94510000   2.57988660
  0.94510000   1.89858169
  0.94520000   1.56644150
  0.94520000   2.47634224
  0.94520000   2.12418342
  0.94520000   2.68922436
  0.94520000   1.66480041
  0.94520000   2.58698112
  0.94520000   1.88330186
  0.94520000   2.74440638
  0.94520000   1.55839142
  0.94520000   2.46650875
  0.94520000   2.14506320
  0.94520000   2.67029224
  0.94520000   1.70329898
  0.94520000   2.62480069
  0.94520000   1.80141067
  0.94520000   2.70337209
  0.94520000   1.63806171
  0.94520000   2.55876220
  0.94520000   1.94496214
  0.94520000   2.75724441
  0.94520000   1.53433072
  0.94520000   2.43658618
  0.94520000   2.20794357
  0.94530000   1.70131587
  0.94530000   2.62416300
  0.94530000   1.80309098
  0.94530000   2.70567527
  0.94530000   1.63373151
  0.94530000   2.55525187
  0.94530000   1.95297931
  0.94530000   2.75878427
  0.94530000   1.53172221
  0.94530000   2.43445653
  0.94530000   2.21281942
  0.94530000   2.59439719
  0.94530000   1.86420460
  0.94530000   2.73807252
  0.94530000   1.57034272
  0.94530000   2.48218567
  0.94530000   2.11178959
  0.94530000   2.70011192
  0.94530000   1.64302879
  0.94530000   2.56525782
  0.94530000   1.93085283
  0.94530000   2.75687156
  0.94530000   1.53521005
  0.94540000   1.86488161
  0.94540000   2.73955487
  0.94540000   1.56780146
  0.94540000   2.48029789
  0.94540000   2.11626852
  0.94540000   2.69749667
  0.94540000   1.64848284
  0.94540000   2.57228987
  0.94540000   1.91579197
  0.94540000   2.75549769
  0.94540000   1.53802424
  0.94540000   2.44354761
  0.94540000   2.19422712
  0.94540000   2.61848506
  0.94540000   1.81256940
  0.94540000   2.71261214
  0.94540000   1.61988891
  0.94540000   2.54107514
  0.94540000   1.98412436
  0.94540000   2.75841915
  0.94540000   1.53231710
  0.94540000   2.43634296
  0.94540000   2.20918794
  0.94550000   1.64512884
  0.94550000   2.56991650
  0.94550000   1.92129001
  0.94550000   2.75768253
  0.94550000   1.53422823
  0.94550000   2.43993168
  0.94550000   2.20221710
  0.94550000   2.60943660
  0.94550000   1.83222411
  0.94550000   2.72509236
  0.94550000   1.59566657
  0.94550000   2.51457301
  0.94550000   2.04232353
  0.94550000   2.74382052
  0.94550000   1.55914289
  0.94550000   2.47089242
  0.94550000   2.13663122
  0.94550000   2.68069446
  0.94550000   1.68246172
  0.94550000   2.60831588
  0.94550000   1.83751375
  0.94550000   2.72803021
  0.94550000   1.59008507
  0.94560000   1.52782081
  0.94560000   2.43297597
  0.94560000   2.21712960
  0.94560000   2.59097912
  0.94560000   1.87231264
  0.94560000   2.74479954
  0.94560000   1.55821616
  0.94560000   2.47093249
  0.94560000   2.13696252
  0.94560000   2.68128692
  0.94560000   1.68147064
  0.94560000   2.60853962
  0.94560000   1.83728449
  0.94560000   2.72909489
  0.94560000   1.58824439
  0.94560000   2.50705795
  0.94560000   2.05899784
  0.94560000   2.73706507
  0.94560000   1.57192267
  0.94560000   2.48758238
  0.94560000   2.10109443
  0.94560000   2.71091123
  0.94560000   1.62216702
  0.94570000   1.65907120
  0.94570000   2.58706727
  0.94570000   1.88442781
  0.94570000   2.75054480
  0.94570000   1.54788325
  0.94570000   2.45935242
  0.94570000   2.16207282
  0.94570000   2.65735208
  0.94570000   1.73101400
  0.94570000   2.65573056
  0.94570000   1.73669242
  0.94570000   2.66066920
  0.94570000   1.72645644
  0.94570000   2.65185313
  0.94570000   1.74499542
  0.94570000   2.66762764
  0.94570000   1.71195883
  0.94570000   2.63886552
  0.94570000   1.77250814
  0.94570000   2.68919219
  0.94570000   1.66758045
  0.94570000   2.59581716
  0.94570000   1.86524577
  0.94580000   1.85406132
  0.94580000   2.73968508
  0.94580000   1.56847890
  0.94580000   2.48579974
  0.94580000   2.10579402
  0.94580000   2.70932594
  0.94580000   1.62572257
  0.94580000   2.55230318
  0.94580000   1.96056519
  0.94580000   2.76425817
  0.94580000   1.52260948
  0.94580000   2.42861316
  0.94580000   2.22685945
  0.94580000   2.57918960
  0.94580000   1.89826107
  0.94580000   2.75558052
  0.94580000   1.53842737
  0.94580000   2.44865770
  0.94580000   2.18489477
  0.94580000   2.63263668
  0.94580000   1.78312335
  0.94580000   2.69791867
  0.94580000   1.64987329
  0.94590000   1.98963552
  0.94590000   2.76302870
  0.94590000   1.52492772
  0.94590000   2.43273615
  0.94590000   2.21875096
  0.94590000   2.59096063
  0.94590000   1.87297989
  0.94590000   2.74849318
  0.94590000   1.55182895
  0.94590000   2.46654502
  0.94590000   2.14735034
  0.94590000   2.67392871
  0.94590000   1.69701222
  0.94590000   2.62720971
  0.94590000   1.79764557
  0.94590000   2.70917482
  0.94590000   1.62774104
  0.94590000   2.55574774
  0.94590000   1.95331630
  0.94590000   2.76528598
  0.94590000   1.52094723
  0.94590000   2.42762732
  0.94590000   2.22925545
  0.94600000   2.05992178
  0.94600000   2.74053815
  0.94600000   1.56614773
  0.94600000   2.48528304
  0.94600000   2.10745641
  0.94600000   2.70981947
  0.94600000   1.62505424
  0.94600000   2.55392517
  0.94600000   1.95750154
  0.94600000   2.76643207
  0.94600000   1.51906949
  0.94600000   2.42637280
  0.94600000   2.23228647
  0.94600000   2.57305217
  0.94600000   1.91207622
  0.94600000   2.76118863
  0.94600000   1.52849887
  0.94600000   2.43841118
  0.94600000   2.20715621
  0.94600000   2.60679808
  0.94600000   1.83883568
  0.94600000   2.73437459
  0.94600000   1.57861225
  0.94610000   2.08442189
  0.94610000   2.72716578
  0.94610000   1.59161034
  0.94610000   2.51688172
  0.94610000   2.03903531
  0.94610000   2.75116956
  0.94610000   1.54658684
  0.94610000   2.46235786
  0.94610000   2.15698185
  0.94610000   2.66589444
  0.94610000   1.71393765
  0.94610000   2.64536119
  0.94610000   1.75932502
  0.94610000   2.68388930
  0.94610000   1.67909353
  0.94610000   2.61220812
  0.94610000   1.83054146
  0.94610000   2.73137828
  0.94610000   1.58476886
  0.94610000   2.50881932
  0.94610000   2.05665739
  0.94610000   2.74309968
  0.94610000   1.56142963
  0.94620000   2.06887605
  0.94620000   2.73759172
  0.94620000   1.57199480
  0.94620000   2.49470292
  0.94620000   2.08768608
  0.94620000   2.72589792
  0.94620000   1.59415701
  0.94620000   2.52103275
  0.94620000   2.03019686
  0.94620000   2.75556993
  0.94620000   1.53869807
  0.94620000   2.45363367
  0.94620000   2.17586657
  0.94620000   2.64621389
  0.94620000   1.75519208
  0.94620000   2.68171786
  0.94620000   1.68356265
  0.94620000   2.61781358
  0.94620000   1.81858753
  0.94620000   2.72578660
  0.94620000   1.59571074
  0.94620000   2.52286415
  0.94620000   2.02623020
  0.94630000   1.99741375
  0.94630000   2.76586408
  0.94630000   1.52049915
  0.94630000   2.43166911
  0.94630000   2.22252811
  0.94630000   2.58873022
  0.94630000   1.87869673
  0.94630000   2.75517978
  0.94630000   1.54016607
  0.94630000   2.45664046
  0.94630000   2.16986657
  0.94630000   2.65373166
  0.94630000   1.73959946
  0.94630000   2.67018720
  0.94630000   1.70755999
  0.94630000   2.64196514
  0.94630000   1.76703593
  0.94630000   2.69221970
  0.94630000   1.66249349
  0.94630000   2.59773578
  0.94630000   1.86238596
  0.94630000   2.74907608
  0.94630000   1.55163098
  0.94640000   1.83569467
  0.94640000   2.73768808
  0.94640000   1.57335764
  0.94640000   2.49871462
  0.94640000   2.07969751
  0.94640000   2.73299575
  0.94640000   1.58097981
  0.94640000   2.50782293
  0.94640000   2.05969081
  0.94640000   2.74446771
  0.94640000   1.55940598
  0.94640000   2.48170016
  0.94640000   2.11643169
  0.94640000   2.70617633
  0.94640000   1.63284200
  0.94640000   2.56725737
  0.94640000   1.92916980
  0.94640000   2.76887121
  0.94640000   1.51552003
  0.94640000   2.42639110
  0.94640000   2.23380748
  0.94640000   2.57366661
  0.94640000   1.91162972
  0.94650000   1.60207150
  0.94650000   2.53382277
  0.94650000   2.00316613
  0.94650000   2.76672677
  0.94650000   1.51927872
  0.94650000   2.43239994
  0.94650000   2.22176999
  0.94650000   2.59118439
  0.94650000   1.87379110
  0.94650000   2.75569559
  0.94650000   1.53958317
  0.94650000   2.45822407
  0.94650000   2.16719944
  0.94650000   2.65826324
  0.94650000   1.73048265
  0.94650000   2.66481161
  0.94650000   1.71911731
  0.94650000   2.65488832
  0.94650000   1.74006078
  0.94650000   2.67306657
  0.94650000   1.70211214
  0.94650000   2.63928772
  0.94650000   1.77315456
  0.94660000   1.52024344
  0.94660000   2.43479710
  0.94660000   2.21717506
  0.94660000   2.59814942
  0.94660000   1.85892335
  0.94660000   2.75089091
  0.94660000   1.54868082
  0.94660000   2.47077904
  0.94660000   2.14070226
  0.94660000   2.68629471
  0.94660000   1.67300537
  0.94660000   2.61200861
  0.94660000   1.83189092
  0.94660000   2.73795233
  0.94660000   1.57309660
  0.94660000   2.50072115
  0.94660000   2.07583167
  0.94660000   2.73721471
  0.94660000   1.57326169
  0.94660000   2.50089438
  0.94660000   2.07533915
  0.94660000   2.73747400
  0.94660000   1.57273891
  0.94670000   1.80263747
  0.94670000   2.72179581
  0.94670000   1.60429600
  0.94670000   2.53873611
  0.94670000   1.99283365
  0.94670000   2.77089010
  0.94670000   1.51225368
  0.94670000   2.42562071
  0.94670000   2.23665418
  0.94670000   2.57174139
  0.94670000   1.91659440
  0.94670000   2.76996199
  0.94670000   1.51401654
  0.94670000   2.42788908
  0.94670000   2.23185915
  0.94670000   2.57851448
  0.94670000   1.90174790
  0.94670000   2.76668511
  0.94670000   1.51988239
  0.94670000   2.43545375
  0.94670000   2.21602319
  0.94670000   2.60028816
  0.94670000   1.85436289
  0.94680000   1.94720867
  0.94680000   2.77466052
  0.94680000   1.50584288
  0.94680000   2.41842292
  0.94680000   2.25195746
  0.94680000   2.54991292
  0.94680000   1.96462703
  0.94680000   2.77463975
  0.94680000   1.50572537
  0.94680000   2.41825646
  0.94680000   2.25222434
  0.94680000   2.54945133
  0.94680000   1.96557877
  0.94680000   2.77456912
  0.94680000   1.50580305
  0.94680000   2.41835033
  0.94680000   2.25198605
  0.94680000   2.54977328
  0.94680000   1.96483452
  0.94680000   2.77458154
  0.94680000   1.50575655
  0.94680000   2.41828442
  0.94680000   2.25209124
  0.94690000   1.54588547
  0.94690000   2.47079348
  0.94690000   2.14174612
  0.94690000   2.68788677
  0.94690000   1.67035540
  0.94690000   2.61292429
  0.94690000   1.83059640
  0.94690000   2.74079910
  0.94690000   1.56829513
  0.94690000   2.49843067
  0.94690000   2.08179704
  0.94690000   2.73631279
  0.94690000   1.57548871
  0.94690000   2.50710385
  0.94690000   2.06271236
  0.94690000   2.74765769
  0.94690000   1.55429040
  0.94690000   2.48122008
  0.94690000   2.11907343
  0.94690000   2.70836465
  0.94690000   1.62933107
  0.94690000   2.56932650
  0.94690000   1.92580454
  0.94700000   1.84392604
  0.94700000   2.74889354
  0.94700000   1.55340190
  0.94700000   2.48133192
  0.94700000   2.11938669
  0.94700000   2.70910261
  0.94700000   1.62816512
  0.94700000   2.56925102
  0.94700000   1.92631604
  0.94700000   2.77519897
  0.94700000   1.50549191
  0.94700000   2.42025986
  0.94700000   2.24897990
  0.94700000   2.55570315
  0.94700000   1.95240801
  0.94700000   2.77693860
  0.94700000   1.50209859
  0.94700000   2.41579676
  0.94700000   2.25808566
  0.94700000   2.54182059
  0.94700000   1.98278446
  0.94700000   2.77516290
  0.94700000   1.50501085
  0.94710000   2.24748947
  0.94710000   2.55869781
  0.94710000   1.94619273
  0.94710000   2.77789254
  0.94710000   1.50072646
  0.94710000   2.41515566
  0.94710000   2.25990617
  0.94710000   2.53974160
  0.94710000   1.98768144
  0.94710000   2.77555067
  0.94710000   1.50454506
  0.94710000   2.42014868
  0.94710000   2.24950481
  0.94710000   2.55552575
  0.94710000   1.95299778
  0.94710000   2.77802122
  0.94710000   1.50037144
  0.94710000   2.41467156
  0.94710000   2.26079900
  0.94710000   2.53827333
  0.94710000   1.99081385
  0.94710000   2.77498244
  0.94710000   1.50546036
  0.94720000   1.64969461
  0.94720000   2.59506951
  0.94720000   1.87028922
  0.94720000   2.76270917
  0.94720000   1.52835033
  0.94720000   2.45211807
  0.94720000   2.18284939
  0.94720000   2.64606583
  0.94720000   1.75743235
  0.94720000   2.69544815
  0.94720000   1.65745696
  0.94720000   2.60323825
  0.94720000   1.85236603
  0.94720000   2.75515251
  0.94720000   1.54207742
  0.94720000   2.46950197
  0.94720000   2.14551453
  0.94720000   2.68666971
  0.94720000   1.67325950
  0.94720000   2.61943568
  0.94720000   1.81704103
  0.94720000   2.73665315
  0.94720000   1.57662919
  0.94730000   1.50886506
  0.94730000   2.42810468
  0.94730000   2.23383915
  0.94730000   2.57995063
  0.94730000   1.90006095
  0.94730000   2.77310338
  0.94730000   1.50965466
  0.94730000   2.42912958
  0.94730000   2.23167732
  0.94730000   2.58300251
  0.94730000   1.89334776
  0.94730000   2.77127101
  0.94730000   1.51287794
  0.94730000   2.43331554
  0.94730000   2.22286163
  0.94730000   2.59533103
  0.94730000   1.86643840
  0.94730000   2.76207173
  0.94730000   1.52939288
  0.94730000   2.45457392
  0.94730000   2.17779920
  0.94730000   2.65265827
  0.94730000   1.74362548
  0.94740000   1.53830641
  0.94740000   2.46708225
  0.94740000   2.15146998
  0.94740000   2.68238747
  0.94740000   1.68238210
  0.94740000   2.63097437
  0.94740000   1.79265325
  0.94740000   2.72366684
  0.94740000   1.60201949
  0.94740000   2.54438860
  0.94740000   1.98222684
  0.94740000   2.77992638
  0.94740000   1.49774326
  0.94740000   2.41466594
  0.94740000   2.26215089
  0.94740000   2.53818823
  0.94740000   1.99185265
  0.94740000   2.77798397
  0.94740000   1.50080383
  0.94740000   2.41867477
  0.94740000   2.25374001
  0.94740000   2.55108605
  0.94740000   1.96345656
  0.94750000   2.18570893
  0.94750000   2.64500848
  0.94750000   1.76026413
  0.94750000   2.70126152
  0.94750000   1.64633187
  0.94750000   2.59504969
  0.94750000   1.87094960
  0.94750000   2.76640817
  0.94750000   1.52221450
  0.94750000   2.44771584
  0.94750000   2.19328428
  0.94750000   2.63569457
  0.94750000   1.77995564
  0.94750000   2.71590972
  0.94750000   1.61716789
  0.94750000   2.56290183
  0.94750000   1.94155128
  0.94750000   2.78230802
  0.94750000   1.49397033
  0.94750000   2.41082083
  0.94750000   2.27047135
  0.94750000   2.52566656
  0.94750000   2.01958970
  0.94760000   1.96364128
  0.94760000   2.78375154
  0.94760000   1.49169567
  0.94760000   2.40896801
  0.94760000   2.27481382
  0.94760000   2.51941758
  0.94760000   2.03368517
  0.94760000   2.76787636
  0.94760000   1.51877326
  0.94760000   2.44440640
  0.94760000   2.20053958
  0.94760000   2.62723650
  0.94760000   1.79815963
  0.94760000   2.72952620
  0.94760000   1.59083739
  0.94760000   2.53365317
  0.94760000   2.00636179
  0.94760000   2.77728123
  0.94760000   1.50253720
  0.94760000   2.42325913
  0.94760000   2.24507850
  0.94760000   2.56550910
  0.94760000   1.93230178
  0.94770000   1.52301412
  0.94770000   2.45105970
  0.94770000   2.18688995
  0.94770000   2.64511086
  0.94770000   1.76040130
  0.94770000   2.70375424
  0.94770000   1.64168102
  0.94770000   2.59242724
  0.94770000   1.87712175
  0.94770000   2.77096475
  0.94770000   1.51444200
  0.94770000   2.43997554
  0.94770000   2.21044572
  0.94770000   2.61511724
  0.94770000   1.82445214
  0.94770000   2.74664910
  0.94770000   1.55856326
  0.94770000   2.49586260
  0.94770000   2.08979318
  0.94770000   2.73831977
  0.94770000   1.57299532
  0.94770000   2.51348530
  0.94770000   2.05101808
  0.94780000   2.01826002
  0.94780000   2.77553020
  0.94780000   1.50577472
  0.94780000   2.42980827
  0.94780000   2.23219622
  0.94780000   2.58576197
  0.94780000   1.88845901
  0.94780000   2.77556272
  0.94780000   1.50629113
  0.94780000   2.43048454
  0.94780000   2.23078190
  0.94780000   2.58776542
  0.94780000   1.88404950
  0.94780000   2.77417317
  0.94780000   1.50871309
  0.94780000   2.43364670
  0.94780000   2.22409260
  0.94780000   2.59717851
  0.94780000   1.86348974
  0.94780000   2.76667790
  0.94780000   1.52203606
  0.94780000   2.45092953
  0.94780000   2.18738948
  0.94790000   1.89983060
  0.94790000   2.77988812
  0.94790000   1.49896148
  0.94790000   2.42200732
  0.94790000   2.24898541
  0.94790000   2.56174545
  0.94790000   1.94137817
  0.94790000   2.78640885
  0.94790000   1.48753899
  0.94790000   2.40684041
  0.94790000   2.28031263
  0.94790000   2.51221491
  0.94790000   2.05025173
  0.94790000   2.76337481
  0.94790000   1.52721044
  0.94790000   2.45872361
  0.94790000   2.17096823
  0.94790000   2.66524283
  0.94790000   1.71841902
  0.94790000   2.67096071
  0.94790000   1.70887964
  0.94790000   2.66236373
  0.94790000   1.72697709
  0.94800000   1.62864310
  0.94800000   2.58169691
  0.94800000   1.90131331
  0.94800000   2.78164279
  0.94800000   1.49628143
  0.94800000   2.41962096
  0.94800000   2.25440571
  0.94800000   2.55416629
  0.94800000   1.95830681
  0.94800000   2.78784499
  0.94800000   1.48521012
  0.94800000   2.40487007
  0.94800000   2.28476657
  0.94800000   2.50544760
  0.94800000   2.06536856
  0.94800000   2.75624054
  0.94800000   1.54019517
  0.94800000   2.47640370
  0.94800000   2.13306971
  0.94800000   2.70540704
  0.94800000   1.63699904
  0.94800000   2.59085374
  0.94800000   1.88102808
  0.94810000   1.60846356
  0.94810000   2.56010399
  0.94810000   1.94921603
  0.94810000   2.78928173
  0.94810000   1.48324313
  0.94810000   2.40339753
  0.94810000   2.28832526
  0.94810000   2.50018135
  0.94810000   2.07726742
  0.94810000   2.74997786
  0.94810000   1.55182642
  0.94810000   2.49216962
  0.94810000   2.09902419
  0.94810000   2.73522724
  0.94810000   1.57948183
  0.94810000   2.52601863
  0.94810000   2.02451578
  0.94810000   2.77679456
  0.94810000   1.50420466
  0.94810000   2.43119336
  0.94810000   2.23040609
  0.94810000   2.59036547
  0.94810000   1.87899273
  0.94820000   1.85087459
  0.94820000   2.76596174
  0.94820000   1.52420842
  0.94820000   2.45838507
  0.94820000   2.17296740
  0.94820000   2.66547276
  0.94820000   1.71859553
  0.94820000   2.67475576
  0.94820000   1.70164809
  0.94820000   2.65925219
  0.94820000   1.73415677
  0.94820000   2.68847515
  0.94820000   1.67359618
  0.94820000   2.63185317
  0.94820000   1.79250207
  0.94820000   2.73310172
  0.94820000   1.58528816
  0.94820000   2.53418755
  0.94820000   2.00688912
  0.94820000   2.78339177
  0.94820000   1.49313495
  0.94820000   2.41772437
  0.94820000   2.25905080
  0.94830000   2.09044300
  0.94830000   2.74294736
  0.94830000   1.56521891
  0.94830000   2.51107591
  0.94830000   2.05812446
  0.94830000   2.76371559
  0.94830000   1.52755074
  0.94830000   2.46382699
  0.94830000   2.16149180
  0.94830000   2.67911070
  0.94830000   1.69059151
  0.94830000   2.64980659
  0.94830000   1.75415096
  0.94830000   2.70613264
  0.94830000   1.63811373
  0.94830000   2.59572700
  0.94830000   1.87121353
  0.94830000   2.77574281
  0.94830000   1.50715087
  0.94830000   2.43737772
  0.94830000   2.21819608
  0.94830000   2.60897057
  0.94830000   1.83895107
  0.94840000   1.63201970
  0.94840000   2.59021424
  0.94840000   1.88350933
  0.94840000   2.78118173
  0.94840000   1.49791071
  0.94840000   2.42637135
  0.94840000   2.24189905
  0.94840000   2.57577951
  0.94840000   1.91173542
  0.94840000   2.78818984
  0.94840000   1.48560971
  0.94840000   2.40997821
  0.94840000   2.27596346
  0.94840000   2.52245914
  0.94840000   2.02915948
  0.94840000   2.77766578
  0.94840000   1.50302378
  0.94840000   2.43308149
  0.94840000   2.22752381
  0.94840000   2.59655704
  0.94840000   1.86611306
  0.94840000   2.77467963
  0.94840000   1.50897569
  0.94850000   1.74589626
  0.94850000   2.70194267
  0.94850000   1.64700897
  0.94850000   2.60777422
  0.94850000   1.84541330
  0.94850000   2.76715647
  0.94850000   1.52284774
  0.94850000   2.46012519
  0.94850000   2.17033496
  0.94850000   2.67091074
  0.94850000   1.70787639
  0.94850000   2.66860356
  0.94850000   1.71499932
  0.94850000   2.67520570
  0.94850000   1.70140088
  0.94850000   2.66264094
  0.94850000   1.72762204
  0.94850000   2.68644679
  0.94850000   1.67828366
  0.94850000   2.64017248
  0.94850000   1.77524343
  0.94850000   2.72460980
  0.94850000   1.60217125
  0.94860000   2.29170205
  0.94860000   2.49754466
  0.94860000   2.08463374
  0.94860000   2.74981396
  0.94860000   1.55303627
  0.94860000   2.49954553
  0.94860000   2.08443154
  0.94860000   2.75042783
  0.94860000   1.55208738
  0.94860000   2.49837041
  0.94860000   2.08704397
  0.94860000   2.74861627
  0.94860000   1.55540742
  0.94860000   2.50249955
  0.94860000   2.07793125
  0.94860000   2.75476551
  0.94860000   1.54414640
  0.94860000   2.48841090
  0.94860000   2.10889073
  0.94860000   2.73198621
  0.94860000   1.58647349
  0.94860000   2.54028665
  0.94860000   1.99427133
  0.94870000   1.57983167
  0.94870000   2.53358031
  0.94870000   2.00965957
  0.94870000   2.78785002
  0.94870000   1.48656285
  0.94870000   2.41470168
  0.94870000   2.26748016
  0.94870000   2.53816168
  0.94870000   1.99539620
  0.94870000   2.79097475
  0.94870000   1.48110730
  0.94870000   2.40735810
  0.94870000   2.28259386
  0.94870000   2.51334259
  0.94870000   2.05007672
  0.94870000   2.77131055
  0.94870000   1.51457314
  0.94870000   2.45166675
  0.94870000   2.18900128
  0.94870000   2.65009118
  0.94870000   1.75161301
  0.94870000   2.70878013
  0.94870000   1.63336677
  0.94880000   1.61078552
  0.94880000   2.57108196
  0.94880000   1.92657647
  0.94880000   2.79534742
  0.94880000   1.47453965
  0.94880000   2.39965537
  0.94880000   2.29900813
  0.94880000   2.48610916
  0.94880000   2.11021139
  0.94880000   2.73215228
  0.94880000   1.58629882
  0.94880000   2.54243747
  0.94880000   1.99000121
  0.94880000   2.79345611
  0.94880000   1.47733466
  0.94880000   2.40341921
  0.94880000   2.29116984
  0.94880000   2.49949821
  0.94880000   2.08081048
  0.94880000   2.75419348
  0.94880000   1.54527749
  0.94880000   2.49215304
  0.94880000   2.10120759
  0.94890000   1.48869237
  0.94890000   2.41983663
  0.94890000   2.25753806
  0.94890000   2.55521530
  0.94890000   1.95824459
  0.94890000   2.79765686
  0.94890000   1.47059677
  0.94890000   2.39543150
  0.94890000   2.30799553
  0.94890000   2.47089135
  0.94890000   2.14363344
  0.94890000   2.70220470
  0.94890000   1.64469551
  0.94890000   2.60996139
  0.94890000   1.84113164
  0.94890000   2.76968881
  0.94890000   1.51896304
  0.94890000   2.45971898
  0.94890000   2.17250478
  0.94890000   2.67152635
  0.94890000   1.70723979
  0.94890000   2.67281024
  0.94890000   1.70692134
  0.94900000   1.95334288
  0.94900000   2.79921842
  0.94900000   1.46850145
  0.94900000   2.39373921
  0.94900000   2.31201260
  0.94900000   2.46440899
  0.94900000   2.15809530
  0.94900000   2.68790114
  0.94900000   1.67365777
  0.94900000   2.64143230
  0.94900000   1.77331454
  0.94900000   2.72916324
  0.94900000   1.59424994
  0.94900000   2.55428501
  0.94900000   1.96441566
  0.94900000   2.79880965
  0.94900000   1.46904559
  0.94900000   2.39446362
  0.94900000   2.31042838
  0.94900000   2.46713689
  0.94900000   2.15209280
  0.94900000   2.69426971
  0.94900000   1.66071678
  0.94910000   2.23648021
  0.94910000   2.58869427
  0.94910000   1.88505879
  0.94910000   2.78949061
  0.94910000   1.48493797
  0.94910000   2.41710122
  0.94910000   2.26410892
  0.94910000   2.54611931
  0.94910000   1.97884503
  0.94910000   2.79811069
  0.94910000   1.47013765
  0.94910000   2.39707894
  0.94910000   2.30546777
  0.94910000   2.47647569
  0.94910000   2.13213263
  0.94910000   2.71518924
  0.94910000   1.61942887
  0.94910000   2.58446447
  0.94910000   1.89755454
  0.94910000   2.79316351
  0.94910000   1.47877937
  0.94910000   2.40879548
  0.94910000   2.28133604
  0.94920000   1.47634917
  0.94920000   2.40668554
  0.94920000   2.28633317
  0.94920000   2.51027775
  0.94920000   2.05842929
  0.94920000   2.77184832
  0.94920000   1.51460737
  0.94920000   2.45752063
  0.94920000   2.17825561
  0.94920000   2.66713345
  0.94920000   1.71691132
  0.94920000   2.68527755
  0.94920000   1.68178554
  0.94920000   2.65207572
  0.94920000   1.75121586
  0.94920000   2.71462759
  0.94920000   1.62294783
  0.94920000   2.58971119
  0.94920000   1.88647409
  0.94920000   2.79129067
  0.94920000   1.48221963
  0.94920000   2.41458743
  0.94920000   2.26974392
  0.94930000   2.01455918
  0.94930000   2.79212693
  0.94930000   1.48033762
  0.94930000   2.41319312
  0.94930000   2.27304955
  0.94930000   2.53290983
  0.94930000   2.00860275
  0.94930000   2.79388855
  0.94930000   1.47736515
  0.94930000   2.40916532
  0.94930000   2.28137069
  0.94930000   2.51907436
  0.94930000   2.03915424
  0.94930000   2.78248657
  0.94930000   1.49638294
  0.94930000   2.43466226
  0.94930000   2.22764159
  0.94930000   2.60274018
  0.94930000   1.85456623
  0.94930000   2.78039548
  0.94930000   1.50080513
  0.94930000   2.44053721
  0.94930000   2.21516891
  0.94940000   2.02355070
  0.94940000   2.79002488
  0.94940000   1.48399845
  0.94940000   2.41926964
  0.94940000   2.26072239
  0.94940000   2.55343170
  0.94940000   1.96341705
  0.94940000   2.80285003
  0.94940000   1.46309423
  0.94940000   2.39087645
  0.94940000   2.31947549
  0.94940000   2.45309057
  0.94940000   2.18384123
  0.94940000   2.66120762
  0.94940000   1.72931330
  0.94940000   2.69859826
  0.94940000   1.65497674
  0.94940000   2.62699978
  0.94940000   1.80529834
  0.94940000   2.75565530
  0.94940000   1.54525231
  0.94940000   2.49919765
  0.94940000   2.08775033
  0.94950000   1.46061015
  0.94950000   2.38863133
  0.94950000   2.32465930
  0.94950000   2.44428771
  0.94950000   2.20321954
  0.94950000   2.63730413
  0.94950000   1.78011126
  0.94950000   2.73990045
  0.94950000   1.57453548
  0.94950000   2.53662391
  0.94950000   2.00495020
  0.94950000   2.79740971
  0.94950000   1.47216004
  0.94950000   2.40439758
  0.94950000   2.29215704
  0.94950000   2.50201476
  0.94950000   2.07741180
  0.94950000   2.76307008
  0.94950000   1.53054520
  0.94950000   2.48161818
  0.94950000   2.12661935
  0.94950000   2.72441972
  0.94950000   1.60245698
  0.94960000   2.02782299
  0.94960000   2.79088740
  0.94960000   1.48315269
  0.94960000   2.42043871
  0.94960000   2.25914830
  0.94960000   2.55727399
  0.94960000   1.95544216
  0.94960000   2.80537490
  0.94960000   1.45948634
  0.94960000   2.38819755
  0.94960000   2.32583726
  0.94960000   2.44254569
  0.94960000   2.20721664
  0.94960000   2.63262808
  0.94960000   1.79023643
  0.94960000   2.74806890
  0.94960000   1.55937643
  0.94960000   2.51919452
  0.94960000   2.04394185
  0.94960000   2.78370137
  0.94960000   1.49507034
  0.94960000   2.43638242
  0.94960000   2.22517081
  0.94970000   2.31880324
  0.94970000   2.45607688
  0.94970000   2.17857147
  0.94970000   2.67004593
  0.94970000   1.71154747
  0.94970000   2.68642429
  0.94970000   1.68033330
  0.94970000   2.65666606
  0.94970000   1.74247089
  0.94970000   2.71353479
  0.94970000   1.62603573
  0.94970000   2.59916946
  0.94970000   1.86679353
  0.94970000   2.79034086
  0.94970000   1.48488941
  0.94970000   2.42391962
  0.94970000   2.25218570
  0.94970000   2.56881978
  0.94970000   1.93007914
  0.94970000   2.80547304
  0.94970000   1.45959579
  0.94970000   2.38947551
  0.94970000   2.32363434
  0.94980000   1.92383947
  0.94980000   2.80622795
  0.94980000   1.45887107
  0.94980000   2.38963972
  0.94980000   2.32391171
  0.94980000   2.44726347
  0.94980000   2.19790620
  0.94980000   2.64651788
  0.94980000   1.76105492
  0.94980000   2.72941329
  0.94980000   1.59504529
  0.94980000   2.56472824
  0.94980000   1.94315531
  0.94980000   2.80780460
  0.94980000   1.45622331
  0.94980000   2.38597624
  0.94980000   2.33127885
  0.94980000   2.43352967
  0.94980000   2.22719875
  0.94980000   2.60614618
  0.94980000   1.84790450
  0.94980000   2.78322674
  0.94980000   1.49687850
  0.94990000   1.52889446
  0.94990000   2.48421534
  0.94990000   2.12245467
  0.94990000   2.73188766
  0.94990000   1.58901433
  0.94990000   2.55876720
  0.94990000   1.95664284
  0.94990000   2.80896149
  0.94990000   1.45456649
  0.94990000   2.38482737
  0.94990000   2.33409694
  0.94990000   2.42882222
  0.94990000   2.23761902
  0.94990000   2.59154648
  0.94990000   1.88010456
  0.94990000   2.79702343
  0.94990000   1.47385699
  0.94990000   2.41126093
  0.94990000   2.27948835
  0.94990000   2.52588949
  0.94990000   2.02570121
  0.94990000   2.79416703
  0.94990000   1.47794697
  0.95000000   1.45744322
  0.95000000   2.38993300
  0.95000000   2.32414614
  0.95000000   2.44789169
  0.95000000   2.19726960
  0.95000000   2.64885259
  0.95000000   1.75648756
  0.95000000   2.72827719
  0.95000000   1.59760500
  0.95000000   2.57012711
  0.95000000   1.93164740
  0.95000000   2.80930177
  0.95000000   1.45431770
  0.95000000   2.38561362
  0.95000000   2.33293218
  0.95000000   2.43151223
  0.95000000   2.23226902
  0.95000000   2.60015635
  0.95000000   1.86142494
  0.95000000   2.79139017
  0.95000000   1.48344315
  0.95000000   2.42539016
  0.95000000   2.25011595
  0.95010000   1.46671258
  0.95010000   2.40381535
  0.95010000   2.29598211
  0.95010000   2.49901632
  0.95010000   2.08591462
  0.95010000   2.76287735
  0.95010000   1.53202403
  0.95010000   2.49054377
  0.95010000   2.10893952
  0.95010000   2.74543040
  0.95010000   1.56390483
  0.95010000   2.53069398
  0.95010000   2.01970591
  0.95010000   2.79892371
  0.95010000   1.47080850
  0.95010000   2.40940534
  0.95010000   2.28424425
  0.95010000   2.51913399
  0.95010000   2.04128272
  0.95010000   2.78945827
  0.95010000   1.48612617
  0.95010000   2.43014931
  0.95010000   2.24033281
  0.95020000   1.57917048
  0.95020000   2.55056222
  0.95020000   1.97581508
  0.95020000   2.81072006
  0.95020000   1.45237840
  0.95020000   2.38520488
  0.95020000   2.33471620
  0.95020000   2.42927125
  0.95020000   2.23786310
  0.95020000   2.59326714
  0.95020000   1.87701551
  0.95020000   2.79948833
  0.95020000   1.47046351
  0.95020000   2.41007015
  0.95020000   2.28325259
  0.95020000   2.52141027
  0.95020000   2.03650063
  0.95020000   2.79266754
  0.95020000   1.48099610
  0.95020000   2.42437627
  0.95020000   2.25300812
  0.95020000   2.57073503
  0.95020000   1.92694487
  0.95030000   1.85810614
  0.95030000   2.79387314
  0.95030000   1.48025366
  0.95030000   2.42456091
  0.95030000   2.25327704
  0.95030000   2.57114747
  0.95030000   1.92642189
  0.95030000   2.81183981
  0.95030000   1.45082204
  0.95030000   2.38416600
  0.95030000   2.33720865
  0.95030000   2.42503413
  0.95030000   2.24719812
  0.95030000   2.57968541
  0.95030000   1.90712114
  0.95030000   2.80871026
  0.95030000   1.45571254
  0.95030000   2.39092946
  0.95030000   2.32331060
  0.95030000   2.45094989
  0.95030000   2.19164324
  0.95030000   2.65831637
  0.95030000   1.73700156
  0.95040000   2.14574293
  0.95040000   2.71338445
  0.95040000   1.62559234
  0.95040000   2.60703140
  0.95040000   1.85093535
  0.95040000   2.79195763
  0.95040000   1.48364584
  0.95040000   2.43029472
  0.95040000   2.24143378
  0.95040000   2.59009670
  0.95040000   1.88478425
  0.95040000   2.80434562
  0.95040000   1.46306771
  0.95040000   2.40222531
  0.95040000   2.30050433
  0.95040000   2.49277636
  0.95040000   2.10054935
  0.95040000   2.75446023
  0.95040000   1.54764330
  0.95040000   2.51392737
  0.95040000   2.05784754
  0.95040000   2.78422578
  0.95040000   1.49565120
  0.95050000   2.30304183
  0.95050000   2.48894880
  0.95050000   2.10940833
  0.95050000   2.74810469
  0.95050000   1.55951005
  0.95050000   2.52997847
  0.95050000   2.02238939
  0.95050000   2.80203068
  0.95050000   1.46659288
  0.95050000   2.40821267
  0.95050000   2.28844133
  0.95050000   2.51441205
  0.95050000   2.05293884
  0.95050000   2.78748495
  0.95050000   1.49019955
  0.95050000   2.44023831
  0.95050000   2.22026556
  0.95050000   2.62182680
  0.95050000   1.81558218
  0.95050000   2.77475778
  0.95050000   1.51302566
  0.95050000   2.47056188
  0.95050000   2.15435467
  0.95060000   2.34964090
  0.95060000   2.40285950
  0.95060000   2.29506460
  0.95060000   2.50268202
  0.95060000   2.07897543
  0.95060000   2.77233665
  0.95060000   1.51621561
  0.95060000   2.47589164
  0.95060000   2.14287727
  0.95060000   2.71795049
  0.95060000   1.61694238
  0.95060000   2.59964274
  0.95060000   1.86754333
  0.95060000   2.80106644
  0.95060000   1.46897409
  0.95060000   2.41262213
  0.95060000   2.27963867
  0.95060000   2.53002266
  0.95060000   2.01849200
  0.95060000   2.80403087
  0.95060000   1.46337223
  0.95060000   2.40491067
  0.95060000   2.29564779
  0.95070000   2.34298195
  0.95070000   2.41621235
  0.95070000   2.26754109
  0.95070000   2.54997198
  0.95070000   1.97407992
  0.95070000   2.81582764
  0.95070000   1.44521683
  0.95070000   2.38088366
  0.95070000   2.34565123
  0.95070000   2.41095104
  0.95070000   2.27848538
  0.95070000   2.53167693
  0.95070000   2.01472437
  0.95070000   2.80627777
  0.95070000   1.45994739
  0.95070000   2.40132687
  0.95070000   2.30352045
  0.95070000   2.48908160
  0.95070000   2.10958312
  0.95070000   2.74963892
  0.95070000   1.55694147
  0.95070000   2.52912310
  0.95070000   2.02473684
  0.95080000   2.32846224
  0.95080000   2.44425825
  0.95080000   2.20809058
  0.95080000   2.64037785
  0.95080000   1.77608960
  0.95080000   2.75265682
  0.95080000   1.55325273
  0.95080000   2.52574525
  0.95080000   2.03281088
  0.95080000   2.80085931
  0.95080000   1.46907832
  0.95080000   2.41505156
  0.95080000   2.27530255
  0.95080000   2.53854348
  0.95080000   2.00006065
  0.95080000   2.81185559
  0.95080000   1.45150543
  0.95080000   2.39077732
  0.95080000   2.32583781
  0.95080000   2.44898645
  0.95080000   2.19771099
  0.95080000   2.65422524
  0.95080000   1.74656311
  0.95090000   2.33216152
  0.95090000   2.43784207
  0.95090000   2.22228186
  0.95090000   2.62114369
  0.95090000   1.81768985
  0.95090000   2.78072508
  0.95090000   1.50350260
  0.95090000   2.46265340
  0.95090000   2.17313600
  0.95090000   2.68673671
  0.95090000   1.67967431
  0.95090000   2.67045680
  0.95090000   1.71564660
  0.95090000   2.70479667
  0.95090000   1.64555875
  0.95090000   2.63506754
  0.95090000   1.79101691
  0.95090000   2.76441096
  0.95090000   1.53234861
  0.95090000   2.50037750
  0.95090000   2.08977288
  0.95090000   2.76804410
  0.95090000   1.52455579
  0.95100000   2.35300085
  0.95100000   2.39834018
  0.95100000   2.30616564
  0.95100000   2.48532377
  0.95100000   2.11863321
  0.95100000   2.74428884
  0.95100000   1.56736178
  0.95100000   2.54560259
  0.95100000   1.98872333
  0.95100000   2.81701122
  0.95100000   1.44418287
  0.95100000   2.38284331
  0.95100000   2.34307615
  0.95100000   2.41746071
  0.95100000   2.26601285
  0.95100000   2.55429535
  0.95100000   1.96511748
  0.95100000   2.81997713
  0.95100000   1.43949509
  0.95100000   2.37625180
  0.95100000   2.35635368
  0.95100000   2.39157370
  0.95100000   2.31996070
  0.95110000   2.35712626
  0.95110000   2.39073813
  0.95110000   2.32229679
  0.95110000   2.45639605
  0.95110000   2.18245956
  0.95110000   2.67607893
  0.95110000   1.70153135
  0.95110000   2.69405651
  0.95110000   1.66733247
  0.95110000   2.66042471
  0.95110000   1.73720514
  0.95110000   2.72606569
  0.95110000   1.60414429
  0.95110000   2.59096169
  0.95110000   1.88803552
  0.95110000   2.81364457
  0.95110000   1.45003382
  0.95110000   2.39215652
  0.95110000   2.32446218
  0.95110000   2.45325638
  0.95110000   2.18958350
  0.95110000   2.66713036
  0.95110000   1.72009521
  0.95120000   2.27122876
  0.95120000   2.54791642
  0.95120000   1.98029080
  0.95120000   2.82038354
  0.95120000   1.43940006
  0.95120000   2.37839933
  0.95120000   2.35304993
  0.95120000   2.39915112
  0.95120000   2.30526456
  0.95120000   2.48802318
  0.95120000   2.11323725
  0.95120000   2.75086190
  0.95120000   1.55559034
  0.95120000   2.53335553
  0.95120000   2.01665075
  0.95120000   2.81125122
  0.95120000   1.45339492
  0.95120000   2.39795931
  0.95120000   2.31276566
  0.95120000   2.47530981
  0.95120000   2.14160651
  0.95120000   2.72368146
  0.95120000   1.60664040
  0.95130000   1.97219009
  0.95130000   2.82300881
  0.95130000   1.43588668
  0.95130000   2.37459601
  0.95130000   2.36131325
  0.95130000   2.38343027
  0.95130000   2.33814514
  0.95130000   2.42755735
  0.95130000   2.24543341
  0.95130000   2.58901987
  0.95130000   1.88872208
  0.95130000   2.81575746
  0.95130000   1.44691589
  0.95130000   2.39005596
  0.95130000   2.32956302
  0.95130000   2.44470496
  0.95130000   2.20881547
  0.95130000   2.64293892
  0.95130000   1.77147834
  0.95130000   2.75529855
  0.95130000   1.54929344
  0.95130000   2.52665822
  0.95130000   2.03207285
  0.95140000   1.52083895
  0.95140000   2.49132717
  0.95140000   2.11150558
  0.95140000   2.75497972
  0.95140000   1.54885829
  0.95140000   2.52730372
  0.95140000   2.03096040
  0.95140000   2.80772473
  0.95140000   1.45938990
  0.95140000   2.40857164
  0.95140000   2.29147616
  0.95140000   2.51456128
  0.95140000   2.05521833
  0.95140000   2.79503128
  0.95140000   1.47948546
  0.95140000   2.43613765
  0.95140000   2.23252841
  0.95140000   2.61028840
  0.95140000   1.84255870
  0.95140000   2.79964525
  0.95140000   1.47284367
  0.95140000   2.42708170
  0.95140000   2.25208255
  0.95150000   1.53674800
  0.95150000   2.51305527
  0.95150000   2.06311343
  0.95150000   2.79186537
  0.95150000   1.48511319
  0.95150000   2.44495142
  0.95150000   2.21392416
  0.95150000   2.63811800
  0.95150000   1.78256574
  0.95150000   2.76569999
  0.95150000   1.53105967
  0.95150000   2.50575979
  0.95150000   2.07954619
  0.95150000   2.78107765
  0.95150000   1.50316118
  0.95150000   2.46917148
  0.95150000   2.16080348
  0.95150000   2.70596010
  0.95150000   1.64210427
  0.95150000   2.63850268
  0.95150000   1.78463279
  0.95150000   2.76726380
  0.95150000   1.52839697
  0.95160000   2.37729992
  0.95160000   2.35156686
  0.95160000   2.40290010
  0.95160000   2.29870616
  0.95160000   2.50186697
  0.95160000   2.08362118
  0.95160000   2.77835868
  0.95160000   1.50765008
  0.95160000   2.47626860
  0.95160000   2.14531512
  0.95160000   2.72379548
  0.95160000   1.60739369
  0.95160000   2.60067926
  0.95160000   1.86744485
  0.95160000   2.81269338
  0.95160000   1.45262017
  0.95160000   2.40144655
  0.95160000   2.30729044
  0.95160000   2.48756678
  0.95160000   2.11584595
  0.95160000   2.75218691
  0.95160000   1.55395597
  0.95160000   2.53604902
  0.95170000   2.73976043
  0.95170000   1.57709271
  0.95170000   2.56585662
  0.95170000   1.94518598
  0.95170000   2.82887602
  0.95170000   1.42814882
  0.95170000   2.36815170
  0.95170000   2.37616588
  0.95170000   2.35550390
  0.95170000   2.39608990
  0.95170000   2.31353896
  0.95170000   2.47571272
  0.95170000   2.14200319
  0.95170000   2.72737405
  0.95170000   1.60039236
  0.95170000   2.59368013
  0.95170000   1.88305487
  0.95170000   2.81904950
  0.95170000   1.44297599
  0.95170000   2.38908541
  0.95170000   2.33340602
  0.95170000   2.43958375
  0.95170000   2.22139472
  0.95180000   2.38270535
  0.95180000   2.34145997
  0.95180000   2.42358141
  0.95180000   2.25579189
  0.95180000   2.57590872
  0.95180000   1.91888821
  0.95180000   2.82767680
  0.95180000   1.42997078
  0.95180000   2.37184599
  0.95180000   2.36905987
  0.95180000   2.37023342
  0.95180000   2.36712843
  0.95180000   2.37312567
  0.95180000   2.36092738
  0.95180000   2.38534257
  0.95180000   2.33591492
  0.95180000   2.43411501
  0.95180000   2.23306610
  0.95180000   2.61121943
  0.95180000   1.84089045
  0.95180000   2.80347642
  0.95180000   1.46738702
  0.95180000   2.42416830
  0.95190000   1.42609048
  0.95190000   2.36747701
  0.95190000   2.37846942
  0.95190000   2.35175818
  0.95190000   2.40448239
  0.95190000   2.29689368
  0.95190000   2.50697525
  0.95190000   2.07321319
  0.95190000   2.78853478
  0.95190000   1.49110723
  0.95190000   2.45765346
  0.95190000   2.18744628
  0.95190000   2.67672432
  0.95190000   1.70195822
  0.95190000   2.70420655
  0.95190000   1.64842357
  0.95190000   2.65023301
  0.95190000   1.76040228
  0.95190000   2.75445198
  0.95190000   1.55228001
  0.95190000   2.53755841
  0.95190000   2.00936887
  0.95190000   2.82104359
  0.95200000   2.27562899
  0.95200000   2.54555146
  0.95200000   1.98764858
  0.95200000   2.82753448
  0.95200000   1.43051460
  0.95200000   2.37489014
  0.95200000   2.36389732
  0.95200000   2.38161410
  0.95200000   2.34499591
  0.95200000   2.41792071
  0.95200000   2.26874127
  0.95200000   2.55601439
  0.95200000   1.96372261
  0.95200000   2.83095817
  0.95200000   1.42545778
  0.95200000   2.36767907
  0.95200000   2.37837609
  0.95200000   2.35226510
  0.95200000   2.40385815
  0.95200000   2.29850872
  0.95200000   2.50457972
  0.95200000   2.07875670
  0.95200000   2.78558214
  0.95210000   1.91310261
  0.95210000   2.83072989
  0.95210000   1.42658492
  0.95210000   2.37045094
  0.95210000   2.37352267
  0.95210000   2.36280248
  0.95210000   2.38361479
  0.95210000   2.34114838
  0.95210000   2.42582808
  0.95210000   2.25221747
  0.95210000   2.58363705
  0.95210000   1.90243349
  0.95210000   2.82827153
  0.95210000   1.42984716
  0.95210000   2.37505606
  0.95210000   2.36394153
  0.95210000   2.38192306
  0.95210000   2.34473844
  0.95210000   2.41886013
  0.95210000   2.26707521
  0.95210000   2.55936463
  0.95210000   1.95642872
  0.95210000   2.83253890
  0.95220000   1.76482695
  0.95220000   2.76135432
  0.95220000   1.54030838
  0.95220000   2.52592424
  0.95220000   2.03642802
  0.95220000   2.81334377
  0.95220000   1.45237117
  0.95220000   2.40795443
  0.95220000   2.29616114
  0.95220000   2.51107181
  0.95220000   2.06536561
  0.95220000   2.79669870
  0.95220000   1.47840026
  0.95220000   2.44389295
  0.95220000   2.21872141
  0.95220000   2.63626457
  0.95220000   1.78787654
  0.95220000   2.77775439
  0.95220000   1.51128864
  0.95220000   2.48812929
  0.95220000   2.12106807
  0.95220000   2.75331448
  0.95220000   1.55328073
  0.95230000   2.33807303
  0.95230000   2.43300563
  0.95230000   2.23769369
  0.95230000   2.60785399
  0.95230000   1.84952787
  0.95230000   2.81341263
  0.95230000   1.45292729
  0.95230000   2.40985978
  0.95230000   2.29249036
  0.95230000   2.51812330
  0.95230000   2.04982628
  0.95230000   2.80688016
  0.95230000   1.46234704
  0.95230000   2.42295453
  0.95230000   2.26443164
  0.95230000   2.56605125
  0.95230000   1.94243469
  0.95230000   2.83513843
  0.95230000   1.42030897
  0.95230000   2.36370972
  0.95230000   2.38784699
  0.95230000   2.33420930
  0.95230000   2.44048079
  0.95240000   1.52542531
  0.95240000   2.50908617
  0.95240000   2.07497458
  0.95240000   2.79289778
  0.95240000   1.48531357
  0.95240000   2.45565431
  0.95240000   2.19384176
  0.95240000   2.67234092
  0.95240000   1.71207826
  0.95240000   2.71970842
  0.95240000   1.61880659
  0.95240000   2.62351020
  0.95240000   1.81920397
  0.95240000   2.79973361
  0.95240000   1.47512176
  0.95240000   2.44174546
  0.95240000   2.22434242
  0.95240000   2.62957894
  0.95240000   1.80275608
  0.95240000   2.78981266
  0.95240000   1.49125193
  0.95240000   2.46368184
  0.95240000   2.17607469
  0.95250000   2.26750822
  0.95250000   2.56241210
  0.95250000   1.95123014
  0.95250000   2.83737259
  0.95250000   1.41768702
  0.95250000   2.36221710
  0.95250000   2.39192267
  0.95250000   2.32675218
  0.95250000   2.45585125
  0.95250000   2.18869723
  0.95250000   2.67898111
  0.95250000   1.69815105
  0.95250000   2.70788095
  0.95250000   1.64217213
  0.95250000   2.65074337
  0.95250000   1.76049282
  0.95250000   2.76179842
  0.95250000   1.54016863
  0.95250000   2.52928568
  0.95250000   2.02963352
  0.95250000   2.81943601
  0.95250000   1.44370777
  0.95250000   2.39921322
  0.95260000   1.93175110
  0.95260000   2.83806989
  0.95260000   1.41697133
  0.95260000   2.36231113
  0.95260000   2.39220737
  0.95260000   2.32659377
  0.95260000   2.45668879
  0.95260000   2.18721306
  0.95260000   2.68168512
  0.95260000   1.69278598
  0.95260000   2.70395933
  0.95260000   1.65019152
  0.95260000   2.66062396
  0.95260000   1.73969851
  0.95260000   2.74637520
  0.95260000   1.56851850
  0.95260000   2.56615285
  0.95260000   1.94692356
  0.95260000   2.83888191
  0.95260000   1.41594153
  0.95260000   2.36083093
  0.95260000   2.39517198
  0.95260000   2.32037709
  0.95270000   2.47812401
  0.95270000   2.14009001
  0.95270000   2.73795614
  0.95270000   1.58229074
  0.95270000   2.58412773
  0.95270000   1.90670010
  0.95270000   2.83636350
  0.95270000   1.41985070
  0.95270000   2.36757351
  0.95270000   2.38210198
  0.95270000   2.34795691
  0.95270000   2.41594415
  0.95270000   2.27590767
  0.95270000   2.54836876
  0.95270000   1.98265374
  0.95270000   2.83584816
  0.95270000   1.42005021
  0.95270000   2.36783547
  0.95270000   2.38138938
  0.95270000   2.34929335
  0.95270000   2.41321477
  0.95270000   2.28163996
  0.95270000   2.53843978
  0.95280000   2.10464068
  0.95280000   2.77357208
  0.95280000   1.51863813
  0.95280000   2.50487391
  0.95280000   2.08544435
  0.95280000   2.78902818
  0.95280000   1.49244412
  0.95280000   2.46995223
  0.95280000   2.16355518
  0.95280000   2.71339478
  0.95280000   1.62987064
  0.95280000   2.64077827
  0.95280000   1.78240751
  0.95280000   2.78143988
  0.95280000   1.50639994
  0.95280000   2.48868422
  0.95280000   2.12182854
  0.95280000   2.75792161
  0.95280000   1.54613876
  0.95280000   2.54043721
  0.95280000   2.00517556
  0.95280000   2.83172591
  0.95280000   1.42635139
  0.95290000   1.41547002
  0.95290000   2.36354667
  0.95290000   2.39131881
  0.95290000   2.32986852
  0.95290000   2.45214163
  0.95290000   2.19833367
  0.95290000   2.66923815
  0.95290000   1.71911887
  0.95290000   2.73211129
  0.95290000   1.59572449
  0.95290000   2.60268357
  0.95290000   1.86604499
  0.95290000   2.82743714
  0.95290000   1.43333903
  0.95290000   2.38909862
  0.95290000   2.33880136
  0.95290000   2.43557502
  0.95290000   2.23467280
  0.95290000   2.61667772
  0.95290000   1.83147640
  0.95290000   2.81195924
  0.95290000   1.45653275
  0.95290000   2.42175556
  0.95300000   2.24325879
  0.95300000   2.60412733
  0.95300000   1.85933041
  0.95300000   2.82577084
  0.95300000   1.43586277
  0.95300000   2.39381322
  0.95300000   2.32935446
  0.95300000   2.45427826
  0.95300000   2.19416851
  0.95300000   2.67565594
  0.95300000   1.70599486
  0.95300000   2.72136594
  0.95300000   1.61660567
  0.95300000   2.62823441
  0.95300000   1.81008703
  0.95300000   2.80165292
  0.95300000   1.47331344
  0.95300000   2.44618886
  0.95300000   2.21681642
  0.95300000   2.64485034
  0.95300000   1.77109607
  0.95300000   2.77564926
  0.95300000   1.51658690
  0.95310000   2.36822855
  0.95310000   2.37819326
  0.95310000   2.35709590
  0.95310000   2.39961649
  0.95310000   2.31213140
  0.95310000   2.48614993
  0.95310000   2.12338582
  0.95310000   2.75822841
  0.95310000   1.54581295
  0.95310000   2.54355587
  0.95310000   1.99881448
  0.95310000   2.83672792
  0.95310000   1.41995148
  0.95310000   2.37221847
  0.95310000   2.37446162
  0.95310000   2.36541115
  0.95310000   2.38306120
  0.95310000   2.34670950
  0.95310000   2.42000233
  0.95310000   2.26860429
  0.95310000   2.56313543
  0.95310000   1.95045064
  0.95310000   2.84380016
  0.95320000   2.59403455
  0.95320000   1.88601794
  0.95320000   2.83741387
  0.95320000   1.41973216
  0.95320000   2.37305187
  0.95320000   2.37338679
  0.95320000   2.36819780
  0.95320000   2.37799452
  0.95320000   2.35770405
  0.95320000   2.39875792
  0.95320000   2.31428049
  0.95320000   2.48265193
  0.95320000   2.13145905
  0.95320000   2.75104739
  0.95320000   1.55894078
  0.95320000   2.56132651
  0.95320000   1.95895393
  0.95320000   2.84489935
  0.95320000   1.40900992
  0.95320000   2.35755864
  0.95320000   2.40460498
  0.95320000   2.30306776
  0.95320000   2.50369971
  0.95330000   2.53983287
  0.95330000   2.00389994
  0.95330000   2.83697562
  0.95330000   1.41998792
  0.95330000   2.37453274
  0.95330000   2.37068562
  0.95330000   2.37410181
  0.95330000   2.36637398
  0.95330000   2.38186739
  0.95330000   2.35002101
  0.95330000   2.41446158
  0.95330000   2.28129984
  0.95330000   2.54265501
  0.95330000   1.99697436
  0.95330000   2.83881191
  0.95330000   1.41727853
  0.95330000   2.37061037
  0.95330000   2.37856236
  0.95330000   2.35783506
  0.95330000   2.39921468
  0.95330000   2.31381020
  0.95330000   2.48408661
  0.95330000   2.12855275
  0.95340000   2.82885498
  0.95340000   1.43191544
  0.95340000   2.39275522
  0.95340000   2.33337304
  0.95340000   2.44873601
  0.95340000   2.20783859
  0.95340000   2.65985698
  0.95340000   1.73976617
  0.95340000   2.75601682
  0.95340000   1.55219378
  0.95340000   2.55528021
  0.95340000   1.97334832
  0.95340000   2.84553311
  0.95340000   1.40868156
  0.95340000   2.35933774
  0.95340000   2.40207275
  0.95340000   2.30932692
  0.95340000   2.49340109
  0.95340000   2.10827492
  0.95340000   2.77500728
  0.95340000   1.51696481
  0.95340000   2.50968703
  0.95340000   2.07615727
  0.95350000   1.46607009
  0.95350000   2.44195630
  0.95350000   2.22797296
  0.95350000   2.63193979
  0.95350000   1.79991913
  0.95350000   2.80130320
  0.95350000   1.47486696
  0.95350000   2.45411481
  0.95350000   2.20116694
  0.95350000   2.67069578
  0.95350000   1.71754582
  0.95350000   2.73807085
  0.95350000   1.58565234
  0.95350000   2.59786453
  0.95350000   1.87810239
  0.95350000   2.83854393
  0.95350000   1.41886073
  0.95350000   2.37517370
  0.95350000   2.37035773
  0.95350000   2.37571670
  0.95350000   2.36396982
  0.95350000   2.38766232
  0.95350000   2.33885038
  0.95360000   2.13945895
  0.95360000   2.74643169
  0.95360000   1.56834993
  0.95360000   2.57786781
  0.95360000   1.92288805
  0.95360000   2.84894921
  0.95360000   1.40478306
  0.95360000   2.35592667
  0.95360000   2.40995896
  0.95360000   2.29345806
  0.95360000   2.52349159
  0.95360000   2.04124179
  0.95360000   2.82433205
  0.95360000   1.43867626
  0.95360000   2.40462300
  0.95360000   2.30896252
  0.95360000   2.49582737
  0.95360000   2.10365066
  0.95360000   2.78094304
  0.95360000   1.50728274
  0.95360000   2.49919697
  0.95360000   2.10044403
  0.95360000   2.78426406
  0.95370000   1.79152571
  0.95370000   2.79856174
  0.95370000   1.47998124
  0.95370000   2.46348950
  0.95370000   2.18120812
  0.95370000   2.69892498
  0.95370000   1.66028895
  0.95370000   2.68469757
  0.95370000   1.69154762
  0.95370000   2.71634569
  0.95370000   1.62802267
  0.95370000   2.64971163
  0.95370000   1.76521821
  0.95370000   2.77999918
  0.95370000   1.51079989
  0.95370000   2.50511419
  0.95370000   2.08769340
  0.95370000   2.79571117
  0.95370000   1.48334738
  0.95370000   2.46806331
  0.95370000   2.17078411
  0.95370000   2.71189968
  0.95370000   1.63443104
  0.95380000   1.96497420
  0.95380000   2.85056625
  0.95380000   1.40285515
  0.95380000   2.35535480
  0.95380000   2.41202893
  0.95380000   2.28983244
  0.95380000   2.53115467
  0.95380000   2.02452058
  0.95380000   2.83434474
  0.95380000   1.42477482
  0.95380000   2.38705511
  0.95380000   2.34693551
  0.95380000   2.42418600
  0.95380000   2.26280957
  0.95380000   2.57754524
  0.95380000   1.92002838
  0.95380000   2.85048663
  0.95380000   1.40302119
  0.95380000   2.35558114
  0.95380000   2.41147708
  0.95380000   2.29091198
  0.95380000   2.52913511
  0.95380000   2.02898226
  0.95390000   1.48248734
  0.95390000   2.46921856
  0.95390000   2.16891541
  0.95390000   2.71584277
  0.95390000   1.62714709
  0.95390000   2.65109171
  0.95390000   1.76250181
  0.95390000   2.78036640
  0.95390000   1.51057221
  0.95390000   2.50716542
  0.95390000   2.08365968
  0.95390000   2.80069587
  0.95390000   1.47578010
  0.95390000   2.46000699
  0.95390000   2.18944258
  0.95390000   2.68959066
  0.95390000   1.67940575
  0.95390000   2.70671680
  0.95390000   1.64724532
  0.95390000   2.67329742
  0.95390000   1.71563026
  0.95390000   2.74135519
  0.95390000   1.58042110
  0.95400000   1.40249146
  0.95400000   2.35709194
  0.95400000   2.40970694
  0.95400000   2.29575665
  0.95400000   2.52179968
  0.95400000   2.04626465
  0.95400000   2.82565278
  0.95400000   1.43771470
  0.95400000   2.40782945
  0.95400000   2.30385126
  0.95400000   2.50757938
  0.95400000   2.07846999
  0.95400000   2.80487842
  0.95400000   1.46912881
  0.95400000   2.45195440
  0.95400000   2.20756293
  0.95400000   2.66534674
  0.95400000   1.72960293
  0.95400000   2.75476647
  0.95400000   1.55567999
  0.95400000   2.56684802
  0.95400000   1.94873616
  0.95400000   2.85433937
  0.95410000   1.39810361
  0.95410000   2.35179478
  0.95410000   2.42079331
  0.95410000   2.27229690
  0.95410000   2.56374594
  0.95410000   1.95192160
  0.95410000   2.85493870
  0.95410000   1.39799245
  0.95410000   2.35160999
  0.95410000   2.42100703
  0.95410000   2.27171188
  0.95410000   2.56465529
  0.95410000   1.94979338
  0.95410000   2.85499143
  0.95410000   1.39788857
  0.95410000   2.35145010
  0.95410000   2.42127258
  0.95410000   2.27108638
  0.95410000   2.56568221
  0.95410000   1.94744239
  0.95410000   2.85504640
  0.95410000   1.39780050
  0.95410000   2.35131635
  0.95420000   2.85624606
  0.95420000   1.39662472
  0.95420000   2.35072888
  0.95420000   2.42329626
  0.95420000   2.26718386
  0.95420000   2.57303964
  0.95420000   1.93124594
  0.95420000   2.85599387
  0.95420000   1.39695107
  0.95420000   2.35120090
  0.95420000   2.42230904
  0.95420000   2.26927509
  0.95420000   2.56943652
  0.95420000   1.93928307
  0.95420000   2.85623381
  0.95420000   1.39658971
  0.95420000   2.35066535
  0.95420000   2.42333597
  0.95420000   2.26700929
  0.95420000   2.57325539
  0.95420000   1.93068077
  0.95420000   2.85591988
  0.95420000   1.39699855
  0.95430000   2.44829963
  0.95430000   2.21685325
  0.95430000   2.65418627
  0.95430000   1.75381698
  0.95430000   2.77840364
  0.95430000   1.51462533
  0.95430000   2.51726067
  0.95430000   2.06193004
  0.95430000   2.81977871
  0.95430000   1.44726846
  0.95430000   2.42482667
  0.95430000   2.26843318
  0.95430000   2.57216644
  0.95430000   1.93364471
  0.95430000   2.85726776
  0.95430000   1.39560601
  0.95430000   2.35034681
  0.95430000   2.42451107
  0.95430000   2.26488392
  0.95430000   2.57751155
  0.95430000   1.92140020
  0.95430000   2.85633298
  0.95430000   1.39677836
  0.95440000   1.41881570
  0.95440000   2.38530577
  0.95440000   2.35355208
  0.95440000   2.41419408
  0.95440000   2.28694213
  0.95440000   2.53971659
  0.95440000   2.00673754
  0.95440000   2.84742565
  0.95440000   1.40840186
  0.95440000   2.37016968
  0.95440000   2.38474236
  0.95440000   2.35009511
  0.95440000   2.42022707
  0.95440000   2.27353352
  0.95440000   2.56302663
  0.95440000   1.95399458
  0.95440000   2.85802310
  0.95440000   1.39476531
  0.95440000   2.35022061
  0.95440000   2.42518405
  0.95440000   2.26375498
  0.95440000   2.58001280
  0.95440000   1.91599922
  0.95450000   2.23515163
  0.95450000   2.62798141
  0.95450000   1.81064252
  0.95450000   2.81987647
  0.95450000   1.44837517
  0.95450000   2.42869772
  0.95450000   2.26086752
  0.95450000   2.58628041
  0.95450000   1.90257075
  0.95450000   2.85597769
  0.95450000   1.39791651
  0.95450000   2.35598204
  0.95450000   2.41422908
  0.95450000   2.28796214
  0.95450000   2.53866530
  0.95450000   2.00942388
  0.95450000   2.84751969
  0.95450000   1.40851323
  0.95450000   2.37145361
  0.95450000   2.38252983
  0.95450000   2.35512638
  0.95450000   2.41059354
  0.95450000   2.29467858
  0.95460000   2.09686818
  0.95460000   2.79587486
  0.95460000   1.48474810
  0.95460000   2.48046266
  0.95460000   2.14592970
  0.95460000   2.74841749
  0.95460000   1.56681008
  0.95460000   2.58797099
  0.95460000   1.90259075
  0.95460000   2.85741357
  0.95460000   1.39649311
  0.95460000   2.35502026
  0.95460000   2.41670981
  0.95460000   2.28304146
  0.95460000   2.54802923
  0.95460000   1.98852864
  0.95460000   2.85491075
  0.95460000   1.39920644
  0.95460000   2.35898285
  0.95460000   2.40853691
  0.95460000   2.30053045
  0.95460000   2.51643148
  0.95460000   2.05995050
  0.95470000   2.37826972
  0.95470000   2.36940859
  0.95470000   2.38330705
  0.95470000   2.35374663
  0.95470000   2.41420076
  0.95470000   2.28770541
  0.95470000   2.53993337
  0.95470000   2.00689717
  0.95470000   2.85043615
  0.95470000   1.40517160
  0.95470000   2.36883210
  0.95470000   2.38886256
  0.95470000   2.34275475
  0.95470000   2.43631547
  0.95470000   2.23958902
  0.95470000   2.62123299
  0.95470000   1.82522457
  0.95470000   2.83022186
  0.95470000   1.43348401
  0.95470000   2.40977754
  0.95470000   2.30256835
  0.95470000   2.51392257
  0.95470000   2.06613695
  0.95480000   2.39233209
  0.95480000   2.34046044
  0.95480000   2.44225181
  0.95480000   2.22729763
  0.95480000   2.64130079
  0.95480000   1.78206280
  0.95480000   2.80526149
  0.95480000   1.47146669
  0.95480000   2.46450226
  0.95480000   2.18258886
  0.95480000   2.70561411
  0.95480000   1.64893176
  0.95480000   2.68605014
  0.95480000   1.69083536
  0.95480000   2.72911907
  0.95480000   1.60534266
  0.95480000   2.63703738
  0.95480000   1.79474947
  0.95480000   2.81392852
  0.95480000   1.45820887
  0.95480000   2.44600778
  0.95480000   2.22386438
  0.95480000   2.64730278
  0.95490000   2.57849282
  0.95490000   1.92481907
  0.95490000   2.86392144
  0.95490000   1.38922736
  0.95490000   2.34768838
  0.95490000   2.43301425
  0.95490000   2.24879976
  0.95490000   2.60823117
  0.95490000   1.85450309
  0.95490000   2.84629330
  0.95490000   1.41175133
  0.95490000   2.38069636
  0.95490000   2.36530419
  0.95490000   2.39267613
  0.95490000   2.33490307
  0.95490000   2.45262252
  0.95490000   2.20423598
  0.95490000   2.67584148
  0.95490000   1.70911455
  0.95490000   2.74748494
  0.95490000   1.57072467
  0.95490000   2.59645244
  0.95490000   1.88432242
  0.95500000   1.38882325
  0.95500000   2.34820010
  0.95500000   2.43242773
  0.95500000   2.25043387
  0.95500000   2.60620931
  0.95500000   1.85918245
  0.95500000   2.84931405
  0.95500000   1.40800202
  0.95500000   2.37636314
  0.95500000   2.37481313
  0.95500000   2.37355928
  0.95500000   2.37540171
  0.95500000   2.37132386
  0.95500000   2.37964999
  0.95500000   2.36229336
  0.95500000   2.39808853
  0.95500000   2.32333920
  0.95500000   2.47533833
  0.95500000   2.15366508
  0.95500000   2.74201500
  0.95500000   1.57895338
  0.95500000   2.60772125
  0.95500000   1.85920852
  0.95510000   1.39076571
  0.95510000   2.35218725
  0.95510000   2.42488709
  0.95510000   2.26730427
  0.95510000   2.57857410
  0.95510000   1.92099534
  0.95510000   2.86542066
  0.95510000   1.38775513
  0.95510000   2.34772831
  0.95510000   2.43380689
  0.95510000   2.24772294
  0.95510000   2.61124661
  0.95510000   1.84822197
  0.95510000   2.84603097
  0.95510000   1.41261495
  0.95510000   2.38421103
  0.95510000   2.35880328
  0.95510000   2.40687225
  0.95510000   2.30545084
  0.95510000   2.50999242
  0.95510000   2.07589169
  0.95510000   2.81705640
  0.95510000   1.45284796
  0.95520000   2.79966659
  0.95520000   1.48132541
  0.95520000   2.48280569
  0.95520000   2.14278786
  0.95520000   2.75705108
  0.95520000   1.55242219
  0.95520000   2.57709034
  0.95520000   1.92851766
  0.95520000   2.86751554
  0.95520000   1.38567940
  0.95520000   2.34578235
  0.95520000   2.43828714
  0.95520000   2.23829335
  0.95520000   2.62711877
  0.95520000   1.81365688
  0.95520000   2.82997293
  0.95520000   1.43518479
  0.95520000   2.41794340
  0.95520000   2.28700342
  0.95520000   2.54523207
  0.95520000   1.99662376
  0.95520000   2.85911975
  0.95520000   1.39552591
  0.95530000   2.36175755
  0.95530000   2.40650148
  0.95530000   2.30800492
  0.95530000   2.50673619
  0.95530000   2.08410590
  0.95530000   2.81281787
  0.95530000   1.45979657
  0.95530000   2.45400013
  0.95530000   2.20771603
  0.95530000   2.67473609
  0.95530000   1.71256768
  0.95530000   2.75562475
  0.95530000   1.55679044
  0.95530000   2.58384730
  0.95530000   1.91359657
  0.95530000   2.86723190
  0.95530000   1.38633723
  0.95530000   2.34787059
  0.95530000   2.43458514
  0.95530000   2.24679610
  0.95530000   2.61409488
  0.95530000   1.84237052
  0.95530000   2.84582906
  0.95540000   2.56046465
  0.95540000   1.96682959
  0.95540000   2.86830495
  0.95540000   1.38526378
  0.95540000   2.34740870
  0.95540000   2.43609148
  0.95540000   2.24394001
  0.95540000   2.61947341
  0.95540000   1.83083803
  0.95540000   2.84157091
  0.95540000   1.41949043
  0.95540000   2.39761136
  0.95540000   2.33175009
  0.95540000   2.46241247
  0.95540000   2.18455601
  0.95540000   2.70690448
  0.95540000   1.64721993
  0.95540000   2.69151245
  0.95540000   1.68072685
  0.95540000   2.72650635
  0.95540000   1.61149207
  0.95540000   2.65150723
  0.95540000   1.76472855
  0.95550000   2.48428980
  0.95550000   2.14046926
  0.95550000   2.76219548
  0.95550000   1.54390716
  0.95550000   2.56980474
  0.95550000   1.94574550
  0.95550000   2.87114531
  0.95550000   1.38223691
  0.95550000   2.34402355
  0.95550000   2.44334690
  0.95550000   2.22824904
  0.95550000   2.64495781
  0.95550000   1.77569995
  0.95550000   2.80935679
  0.95550000   1.46670732
  0.95550000   2.46601525
  0.95550000   2.18159062
  0.95550000   2.71236886
  0.95550000   1.63692214
  0.95550000   2.68150341
  0.95550000   1.70155996
  0.95550000   2.74798648
  0.95550000   1.57127180
  0.95560000   2.37515274
  0.95560000   2.38014786
  0.95560000   2.36525519
  0.95560000   2.39544950
  0.95560000   2.33188627
  0.95560000   2.46218196
  0.95560000   2.18539184
  0.95560000   2.70719890
  0.95560000   1.64695511
  0.95560000   2.69367139
  0.95560000   1.67671096
  0.95560000   2.72493276
  0.95560000   1.61492616
  0.95560000   2.65792794
  0.95560000   1.75143309
  0.95560000   2.79257748
  0.95560000   1.49386039
  0.95560000   2.50466951
  0.95560000   2.09440116
  0.95560000   2.80786338
  0.95560000   1.46828296
  0.95560000   2.46937469
  0.95560000   2.17429728
  0.95570000   1.88884248
  0.95570000   2.86683052
  0.95570000   1.38788455
  0.95570000   2.35463750
  0.95570000   2.42289400
  0.95570000   2.27400979
  0.95570000   2.57071807
  0.95570000   1.94008474
  0.95570000   2.87304342
  0.95570000   1.38044518
  0.95570000   2.34357213
  0.95570000   2.44515294
  0.95570000   2.22489496
  0.95570000   2.65147471
  0.95570000   1.76211329
  0.95570000   2.80185137
  0.95570000   1.47891806
  0.95570000   2.48531572
  0.95570000   2.13861848
  0.95570000   2.76580203
  0.95570000   1.53786068
  0.95570000   2.56436320
  0.95570000   1.95845774
  0.95580000   1.48613173
  0.95580000   2.49645306
  0.95580000   2.11375835
  0.95580000   2.79226409
  0.95580000   1.49348516
  0.95580000   2.50650183
  0.95580000   2.09074923
  0.95580000   2.81277353
  0.95580000   1.46125536
  0.95580000   2.46186752
  0.95580000   2.19193715
  0.95580000   2.70077437
  0.95580000   1.66048518
  0.95580000   2.71060897
  0.95580000   1.64322030
  0.95580000   2.69217829
  0.95580000   1.68039192
  0.95580000   2.73112913
  0.95580000   1.60350961
  0.95580000   2.64705516
  0.95580000   1.77515446
  0.95580000   2.81284795
  0.95580000   1.46225390
  0.95590000   2.87357460
  0.95590000   1.38054313
  0.95590000   2.34595910
  0.95590000   2.44145512
  0.95590000   2.23390760
  0.95590000   2.63889200
  0.95590000   1.78957940
  0.95590000   2.82370912
  0.95590000   1.44605707
  0.95590000   2.44152464
  0.95590000   2.23784788
  0.95590000   2.63320804
  0.95590000   1.80206334
  0.95590000   2.83163964
  0.95590000   1.43463218
  0.95590000   2.42518156
  0.95590000   2.27398544
  0.95590000   2.57262111
  0.95590000   1.93646089
  0.95590000   2.87530540
  0.95590000   1.37847933
  0.95590000   2.34286815
  0.95590000   2.44756311
  0.95600000   2.87688940
  0.95600000   1.37723343
  0.95600000   2.34215059
  0.95600000   2.44972165
  0.95600000   2.21597267
  0.95600000   2.66725385
  0.95600000   1.72944036
  0.95600000   2.77917316
  0.95600000   1.51693937
  0.95600000   2.54048015
  0.95600000   2.01378758
  0.95600000   2.86202666
  0.95600000   1.39435864
  0.95600000   2.36759766
  0.95600000   2.39772266
  0.95600000   2.32973171
  0.95600000   2.46884290
  0.95600000   2.17193706
  0.95600000   2.72798708
  0.95600000   1.60736489
  0.95600000   2.65391460
  0.95600000   1.76053036
  0.95600000   2.80448433
  0.95610000   2.29789060
  0.95610000   2.53015045
  0.95610000   2.03316764
  0.95610000   2.85366278
  0.95610000   1.40480926
  0.95610000   2.38411945
  0.95610000   2.36347212
  0.95610000   2.40217146
  0.95610000   2.31981004
  0.95610000   2.48841229
  0.95610000   2.12792268
  0.95610000   2.77986786
  0.95610000   1.51425513
  0.95610000   2.53803723
  0.95610000   2.01937118
  0.95610000   2.86062982
  0.95610000   1.39626779
  0.95610000   2.37153521
  0.95610000   2.38993023
  0.95610000   2.34673678
  0.95610000   2.43551740
  0.95610000   2.24667951
  0.95610000   2.61925479
  0.95620000   2.84921459
  0.95620000   1.41149710
  0.95620000   2.39507249
  0.95620000   2.34071735
  0.95620000   2.44893310
  0.95620000   2.21759080
  0.95620000   2.66598257
  0.95620000   1.73235682
  0.95620000   2.78409839
  0.95620000   1.50901938
  0.95620000   2.53225624
  0.95620000   2.03308258
  0.95620000   2.85526932
  0.95620000   1.40323223
  0.95620000   2.38293977
  0.95620000   2.36647089
  0.95620000   2.39647198
  0.95620000   2.33247926
  0.95620000   2.46422871
  0.95620000   2.18286669
  0.95620000   2.71520532
  0.95620000   1.63234778
  0.95620000   2.68494644
  0.95630000   1.95355701
  0.95630000   2.87926627
  0.95630000   1.37532064
  0.95630000   2.34262148
  0.95630000   2.45022286
  0.95630000   2.21587723
  0.95630000   2.66952312
  0.95630000   1.72525205
  0.95630000   2.77923159
  0.95630000   1.51747933
  0.95630000   2.54476569
  0.95630000   2.00478699
  0.95630000   2.86854701
  0.95630000   1.38745232
  0.95630000   2.36072661
  0.95630000   2.41336076
  0.95630000   2.29720949
  0.95630000   2.53252394
  0.95630000   2.02824597
  0.95630000   2.85809961
  0.95630000   1.39976595
  0.95630000   2.37894630
  0.95630000   2.37523974
  0.95640000   1.96489135
  0.95640000   2.87896802
  0.95640000   1.37584208
  0.95640000   2.34450785
  0.95640000   2.44686425
  0.95640000   2.22368327
  0.95640000   2.65832198
  0.95640000   1.74899291
  0.95640000   2.80027464
  0.95640000   1.48307611
  0.95640000   2.49927645
  0.95640000   2.10907839
  0.95640000   2.80201683
  0.95640000   1.47919596
  0.95640000   2.49390107
  0.95640000   2.12126129
  0.95640000   2.79010663
  0.95640000   1.49823248
  0.95640000   2.52002898
  0.95640000   2.06150975
  0.95640000   2.84038848
  0.95640000   1.42311119
  0.95640000   2.41426685
  0.95650000   2.36336516
  0.95650000   2.40896628
  0.95650000   2.30767534
  0.95650000   2.51416690
  0.95650000   2.07074821
  0.95650000   2.83431416
  0.95650000   1.43150056
  0.95650000   2.42755378
  0.95650000   2.27101092
  0.95650000   2.58155849
  0.95650000   1.91775718
  0.95650000   2.88107841
  0.95650000   1.37399084
  0.95650000   2.34284456
  0.95650000   2.45071634
  0.95650000   2.21541361
  0.95650000   2.67159383
  0.95650000   1.72125710
  0.95650000   2.77816572
  0.95650000   1.51967901
  0.95650000   2.55006351
  0.95650000   1.99315625
  0.95650000   2.87439311
  0.95660000   1.73774852
  0.95660000   2.79363819
  0.95660000   1.49431649
  0.95660000   2.51709197
  0.95660000   2.06902967
  0.95660000   2.83719801
  0.95660000   1.42803822
  0.95660000   2.42371645
  0.95660000   2.28000138
  0.95660000   2.56634681
  0.95660000   1.95240711
  0.95660000   2.88262335
  0.95660000   1.37256685
  0.95660000   2.34182336
  0.95660000   2.45328700
  0.95660000   2.21002591
  0.95660000   2.68036466
  0.95660000   1.70327889
  0.95660000   2.76302825
  0.95660000   1.54619288
  0.95660000   2.58595505
  0.95660000   1.91186969
  0.95660000   2.88188986
  0.95670000   2.28583058
  0.95670000   2.55654588
  0.95670000   1.97497912
  0.95670000   2.88065330
  0.95670000   1.37498420
  0.95670000   2.34657702
  0.95670000   2.44425773
  0.95670000   2.23063876
  0.95670000   2.64960439
  0.95670000   1.76817665
  0.95670000   2.81862342
  0.95670000   1.45555880
  0.95670000   2.46428801
  0.95670000   2.18963865
  0.95670000   2.71082200
  0.95670000   1.64229357
  0.95670000   2.70214825
  0.95670000   1.66184713
  0.95670000   2.72319471
  0.95670000   1.62050058
  0.95670000   2.67780240
  0.95670000   1.71179780
  0.95670000   2.77230622
  0.95680000   2.18842267
  0.95680000   2.71244510
  0.95680000   1.63903711
  0.95680000   2.69977832
  0.95680000   1.66678249
  0.95680000   2.72957814
  0.95680000   1.60845416
  0.95680000   2.66508290
  0.95680000   1.73871805
  0.95680000   2.79703920
  0.95680000   1.48940282
  0.95680000   2.51272187
  0.95680000   2.07962227
  0.95680000   2.83114123
  0.95680000   1.43690412
  0.95680000   2.43880751
  0.95680000   2.24723799
  0.95680000   2.62402314
  0.95680000   1.82399044
  0.95680000   2.85493130
  0.95680000   1.40580010
  0.95680000   2.39351337
  0.95680000   2.34659213
  0.95690000   2.68821299
  0.95690000   1.68789636
  0.95690000   2.75202319
  0.95690000   1.56667372
  0.95690000   2.61561652
  0.95690000   1.84625166
  0.95690000   2.86698027
  0.95690000   1.39153554
  0.95690000   2.37355704
  0.95690000   2.38960924
  0.95690000   2.35108718
  0.95690000   2.43082719
  0.95690000   2.26022328
  0.95690000   2.60187003
  0.95690000   1.87282521
  0.95690000   2.87640037
  0.95690000   1.38043233
  0.95690000   2.35696511
  0.95690000   2.42395463
  0.95690000   2.27635059
  0.95690000   2.57396973
  0.95690000   1.93558180
  0.95690000   2.88648245
  0.95700000   2.61450010
  0.95700000   1.84545890
  0.95700000   2.86757950
  0.95700000   1.39099374
  0.95700000   2.37387196
  0.95700000   2.38936311
  0.95700000   2.35203346
  0.95700000   2.42938658
  0.95700000   2.26380224
  0.95700000   2.59635553
  0.95700000   1.88536828
  0.95700000   2.88109209
  0.95700000   1.37558225
  0.95700000   2.35081183
  0.95700000   2.43707310
  0.95700000   2.24768987
  0.95700000   2.62395839
  0.95700000   1.82431837
  0.95700000   2.85746464
  0.95700000   1.40315324
  0.95700000   2.39187563
  0.95700000   2.35094847
  0.95700000   2.43223011
  0.95710000   2.79865751
  0.95710000   1.48757550
  0.95710000   2.51376294
  0.95710000   2.07819597
  0.95710000   2.83515171
  0.95710000   1.43215746
  0.95710000   2.43542751
  0.95710000   2.25598155
  0.95710000   2.61141053
  0.95710000   1.85249177
  0.95710000   2.87167197
  0.95710000   1.38651645
  0.95710000   2.36831932
  0.95710000   2.40144273
  0.95710000   2.32643569
  0.95710000   2.48120444
  0.95710000   2.14763559
  0.95710000   2.76667699
  0.95710000   1.53897063
  0.95710000   2.58257484
  0.95710000   1.92048628
  0.95710000   2.88846640
  0.95710000   1.36821541
  0.95720000   2.53480817
  0.95720000   2.02586294
  0.95720000   2.86859589
  0.95720000   1.38990793
  0.95720000   2.37450652
  0.95720000   2.38888091
  0.95720000   2.35391553
  0.95720000   2.42650744
  0.95720000   2.27094536
  0.95720000   2.58513947
  0.95720000   1.91099329
  0.95720000   2.88825148
  0.95720000   1.36864004
  0.95720000   2.34258869
  0.95720000   2.45477859
  0.95720000   2.20878266
  0.95720000   2.68657648
  0.95720000   1.69168650
  0.95720000   2.75938259
  0.95720000   1.55393484
  0.95720000   2.60311310
  0.95720000   1.87466918
  0.95720000   2.88086010
  0.95730000   2.11367725
  0.95730000   2.80575766
  0.95730000   1.47553529
  0.95730000   2.49939791
  0.95730000   2.11157392
  0.95730000   2.80775611
  0.95730000   1.47242945
  0.95730000   2.49505311
  0.95730000   2.12149632
  0.95730000   2.79783663
  0.95730000   1.48786219
  0.95730000   2.51647758
  0.95730000   2.07229911
  0.95730000   2.84143898
  0.95730000   1.42409939
  0.95730000   2.42602133
  0.95730000   2.27759977
  0.95730000   2.57489890
  0.95730000   1.93470713
  0.95730000   2.89105952
  0.95730000   1.36611506
  0.95730000   2.33988970
  0.95730000   2.46074911
  0.95740000   2.46227998
  0.95740000   2.19277743
  0.95740000   2.71136581
  0.95740000   1.64252344
  0.95740000   2.71103063
  0.95740000   1.64558973
  0.95740000   2.71446378
  0.95740000   1.63897798
  0.95740000   2.70722387
  0.95740000   1.65332454
  0.95740000   2.72283781
  0.95740000   1.62268779
  0.95740000   2.68892029
  0.95740000   1.69029987
  0.95740000   2.76068415
  0.95740000   1.55232281
  0.95740000   2.60350689
  0.95740000   1.87437518
  0.95740000   2.88317904
  0.95740000   1.37487477
  0.95740000   2.35424012
  0.95740000   2.43216453
  0.95740000   2.26022218
  0.95750000   2.81900495
  0.95750000   1.45586807
  0.95750000   2.47403732
  0.95750000   2.17015102
  0.95750000   2.74311055
  0.95750000   1.58235730
  0.95750000   2.64229871
  0.95750000   1.78881142
  0.95750000   2.84294581
  0.95750000   1.42350693
  0.95750000   2.42746778
  0.95750000   2.27530911
  0.95750000   2.58030762
  0.95750000   1.92301375
  0.95750000   2.89293829
  0.95750000   1.36496618
  0.95750000   2.34038145
  0.95750000   2.46082149
  0.95750000   2.19624185
  0.95750000   2.70707627
  0.95750000   1.65105374
  0.95750000   2.72149380
  0.95750000   1.62520201
  0.95760000   2.55636529
  0.95760000   1.97749736
  0.95760000   2.88983863
  0.95760000   1.36827615
  0.95760000   2.34651457
  0.95760000   2.44893012
  0.95760000   2.22346774
  0.95760000   2.66718459
  0.95760000   1.73272551
  0.95760000   2.80169548
  0.95760000   1.48366836
  0.95760000   2.51423355
  0.95760000   2.07841077
  0.95760000   2.83962694
  0.95760000   1.42732607
  0.95760000   2.43416474
  0.95760000   2.26062400
  0.95760000   2.60664244
  0.95760000   1.86411996
  0.95760000   2.88190941
  0.95760000   1.37671606
  0.95760000   2.35923786
  0.95760000   2.42271069
  0.95770000   2.45195951
  0.95770000   2.21582253
  0.95770000   2.67930566
  0.95770000   1.70750112
  0.95770000   2.78054334
  0.95770000   1.51831743
  0.95770000   2.56259148
  0.95770000   1.96764619
  0.95770000   2.89327372
  0.95770000   1.36534193
  0.95770000   2.34318786
  0.95770000   2.45622531
  0.95770000   2.20737677
  0.95770000   2.69239011
  0.95770000   1.68088344
  0.95770000   2.75494387
  0.95770000   1.56298399
  0.95770000   2.62066211
  0.95770000   1.83673350
  0.95770000   2.87229085
  0.95770000   1.38779528
  0.95770000   2.37699286
  0.95770000   2.38598118
  0.95780000   2.49335463
  0.95780000   2.12711235
  0.95780000   2.79643354
  0.95780000   1.49129460
  0.95780000   2.52713156
  0.95780000   2.04928873
  0.95780000   2.86213811
  0.95780000   1.39938389
  0.95780000   2.39539652
  0.95780000   2.34691971
  0.95780000   2.44455279
  0.95780000   2.23324093
  0.95780000   2.65284391
  0.95780000   1.76337170
  0.95780000   2.82856299
  0.95780000   1.44389222
  0.95780000   2.46041732
  0.95780000   2.20220423
  0.95780000   2.70127976
  0.95780000   1.66334723
  0.95780000   2.73826190
  0.95780000   1.59388364
  0.95780000   2.65999405
  0.95790000   1.82205320
  0.95790000   2.86727264
  0.95790000   1.39413744
  0.95790000   2.38873058
  0.95790000   2.36183803
  0.95790000   2.41434004
  0.95790000   2.30089675
  0.95790000   2.53474606
  0.95790000   2.02750204
  0.95790000   2.87478230
  0.95790000   1.38495251
  0.95790000   2.37497894
  0.95790000   2.39102875
  0.95790000   2.35231551
  0.95790000   2.43319883
  0.95790000   2.25872931
  0.95790000   2.61085904
  0.95790000   1.85501821
  0.95790000   2.88207676
  0.95790000   1.37745594
  0.95790000   2.36370960
  0.95790000   2.41478541
  0.95790000   2.30054105
  0.95800000   1.40068269
  0.95800000   2.39960560
  0.95800000   2.33874139
  0.95800000   2.46224597
  0.95800000   2.19407409
  0.95800000   2.71381046
  0.95800000   1.63878292
  0.95800000   2.71429047
  0.95800000   1.64030711
  0.95800000   2.71606543
  0.95800000   1.63700284
  0.95800000   2.71242783
  0.95800000   1.64419121
  0.95800000   2.72035707
  0.95800000   1.62868602
  0.95800000   2.70311728
  0.95800000   1.66271074
  0.95800000   2.74019533
  0.95800000   1.59090738
  0.95800000   2.65887967
  0.95800000   1.75433060
  0.95800000   2.82438706
  0.95800000   1.45061573
  0.95810000   2.46518028
  0.95810000   2.18860555
  0.95810000   2.72255535
  0.95810000   1.62216224
  0.95810000   2.69684474
  0.95810000   1.67536692
  0.95810000   2.75447650
  0.95810000   1.56489940
  0.95810000   2.62796942
  0.95810000   1.82158137
  0.95810000   2.86966396
  0.95810000   1.39209425
  0.95810000   2.38794867
  0.95810000   2.36441758
  0.95810000   2.40989916
  0.95810000   2.31145482
  0.95810000   2.51567105
  0.95810000   2.07179985
  0.95810000   2.84877396
  0.95810000   1.41646869
  0.95810000   2.42402100
  0.95810000   2.28505880
  0.95810000   2.56617802
  0.95820000   2.79223264
  0.95820000   1.49893265
  0.95820000   2.54235882
  0.95820000   2.01534409
  0.95820000   2.88422131
  0.95820000   1.37604402
  0.95820000   2.36497566
  0.95820000   2.41370801
  0.95820000   2.30426906
  0.95820000   2.53030058
  0.95820000   2.03862957
  0.95820000   2.87187473
  0.95820000   1.38911680
  0.95820000   2.38460554
  0.95820000   2.37184102
  0.95820000   2.39462783
  0.95820000   2.34510728
  0.95820000   2.44923418
  0.95820000   2.22373689
  0.95820000   2.67055165
  0.95820000   1.72661950
  0.95820000   2.80382584
  0.95820000   1.48167026
  0.95830000   2.43422154
  0.95830000   2.25801341
  0.95830000   2.61476059
  0.95830000   1.84733008
  0.95830000   2.88383806
  0.95830000   1.37697424
  0.95830000   2.36748916
  0.95830000   2.40883832
  0.95830000   2.31534209
  0.95830000   2.50947240
  0.95830000   2.08673260
  0.95830000   2.83872409
  0.95830000   1.43017870
  0.95830000   2.44636798
  0.95830000   2.23569236
  0.95830000   2.65306098
  0.95830000   1.76416465
  0.95830000   2.83534057
  0.95830000   1.43579787
  0.95830000   2.45454019
  0.95830000   2.21731775
  0.95830000   2.68224708
  0.95830000   1.70294019
  0.95840000   2.56889613
  0.95840000   1.95519040
  0.95840000   2.90282420
  0.95840000   1.35890715
  0.95840000   2.34121209
  0.95840000   2.46392294
  0.95840000   2.19246830
  0.95840000   2.71937448
  0.95840000   1.62887116
  0.95840000   2.70816432
  0.95840000   1.65324855
  0.95840000   2.73509530
  0.95840000   1.60125626
  0.95840000   2.67620444
  0.95840000   1.71857738
  0.95840000   2.79947621
  0.95840000   1.48928213
  0.95840000   2.53148716
  0.95840000   2.04102713
  0.95840000   2.87313050
  0.95840000   1.38853144
  0.95840000   2.38600540
  0.95840000   2.36982083
  0.95850000   2.90345390
  0.95850000   1.35870075
  0.95850000   2.34201249
  0.95850000   2.46281796
  0.95850000   2.19534157
  0.95850000   2.71603444
  0.95850000   1.63556149
  0.95850000   2.71690959
  0.95850000   1.63623156
  0.95850000   2.71773762
  0.95850000   1.63477007
  0.95850000   2.71612404
  0.95850000   1.63795652
  0.95850000   2.71967493
  0.95850000   1.63103743
  0.95850000   2.71194395
  0.95850000   1.64617859
  0.95850000   2.72871576
  0.95850000   1.61361238
  0.95850000   2.69198870
  0.95850000   1.68621636
  0.95850000   2.77031121
  0.95850000   1.53780620
  0.95860000   2.41075093
  0.95860000   2.31689180
  0.95860000   2.50895742
  0.95860000   2.08917880
  0.95860000   2.83959534
  0.95860000   1.42992509
  0.95860000   2.44948339
  0.95860000   2.22983143
  0.95860000   2.66469342
  0.95860000   1.74015544
  0.95860000   2.82029228
  0.95860000   1.45794599
  0.95860000   2.48986045
  0.95860000   2.13756674
  0.95860000   2.79176454
  0.95860000   1.50053492
  0.95860000   2.54929682
  0.95860000   2.00034978
  0.95860000   2.89432621
  0.95860000   1.36730465
  0.95860000   2.35621497
  0.95860000   2.43389236
  0.95860000   2.26091136
  0.95870000   1.75115448
  0.95870000   2.83037686
  0.95870000   1.44381711
  0.95870000   2.47079346
  0.95870000   2.18174210
  0.95870000   2.73720771
  0.95870000   1.59577431
  0.95870000   2.67327166
  0.95870000   1.72517047
  0.95870000   2.80899168
  0.95870000   1.47521904
  0.95870000   2.51546085
  0.95870000   2.07887636
  0.95870000   2.84972312
  0.95870000   1.41721636
  0.95870000   2.43203509
  0.95870000   2.26963260
  0.95870000   2.59787208
  0.95870000   1.88621901
  0.95870000   2.90129439
  0.95870000   1.36129623
  0.95870000   2.34817697
  0.95870000   2.45101686
  0.95880000   2.39625066
  0.95880000   2.34943499
  0.95880000   2.44445739
  0.95880000   2.23718363
  0.95880000   2.65334273
  0.95880000   1.76439247
  0.95880000   2.84165873
  0.95880000   1.42865165
  0.95880000   2.44994280
  0.95880000   2.22958847
  0.95880000   2.66649403
  0.95880000   1.73676715
  0.95880000   2.81996134
  0.95880000   1.45893518
  0.95880000   2.49361110
  0.95880000   2.12953926
  0.95880000   2.80241752
  0.95880000   1.48417511
  0.95880000   2.52911959
  0.95880000   2.04740958
  0.95880000   2.87317831
  0.95880000   1.38968365
  0.95880000   2.39225861
  0.95890000   1.85036342
  0.95890000   2.89229790
  0.95890000   1.37051333
  0.95890000   2.36445551
  0.95890000   2.41813345
  0.95890000   2.29730962
  0.95890000   2.54757374
  0.95890000   2.00086799
  0.95890000   2.89680893
  0.95890000   1.36586179
  0.95890000   2.35737156
  0.95890000   2.43288819
  0.95890000   2.26428599
  0.95890000   2.60795362
  0.95890000   1.86388498
  0.95890000   2.89722514
  0.95890000   1.36575562
  0.95890000   2.35720722
  0.95890000   2.43325411
  0.95890000   2.26345961
  0.95890000   2.60939449
  0.95890000   1.86065406
  0.95890000   2.89610303
  0.95900000   2.03393938
  0.95900000   2.88331243
  0.95900000   1.37963116
  0.95900000   2.37940939
  0.95900000   2.38683311
  0.95900000   2.36640018
  0.95900000   2.40930816
  0.95900000   2.31627101
  0.95900000   2.51123436
  0.95900000   2.08463104
  0.95900000   2.84701948
  0.95900000   1.42124285
  0.95900000   2.44138703
  0.95900000   2.24954635
  0.95900000   2.63472562
  0.95900000   1.80521599
  0.95900000   2.87124008
  0.95900000   1.39294493
  0.95900000   2.39941494
  0.95900000   2.34328378
  0.95900000   2.45801695
  0.95900000   2.20706438
  0.95900000   2.70214730
  0.95910000   2.19906515
  0.95910000   2.71566259
  0.95910000   1.63765562
  0.95910000   2.72668487
  0.95910000   1.61858904
  0.95910000   2.70515482
  0.95910000   1.66085493
  0.95910000   2.75189445
  0.95910000   1.57173922
  0.95910000   2.64875920
  0.95910000   1.77836402
  0.95910000   2.85559757
  0.95910000   1.41189660
  0.95910000   2.42879612
  0.95910000   2.27859707
  0.95910000   2.58427109
  0.95910000   1.91786855
  0.95910000   2.91088119
  0.95910000   1.35442559
  0.95910000   2.34212630
  0.95910000   2.46548119
  0.95910000   2.19119653
  0.95910000   2.72642160
  0.95920000   2.65878163
  0.95920000   1.75705455
  0.95920000   2.84134487
  0.95920000   1.43043914
  0.95920000   2.45721135
  0.95920000   2.21462709
  0.95920000   2.69303222
  0.95920000   1.68284314
  0.95920000   2.77555968
  0.95920000   1.53023893
  0.95920000   2.59650170
  0.95920000   1.89420355
  0.95920000   2.90921091
  0.95920000   1.35636075
  0.95920000   2.34622032
  0.95920000   2.45767755
  0.95920000   2.20941614
  0.95920000   2.70034897
  0.95920000   1.66786164
  0.95920000   2.76030814
  0.95920000   1.55662536
  0.95920000   2.63082774
  0.95920000   1.81754806
  0.95930000   1.88549737
  0.95930000   2.90824238
  0.95930000   1.35748013
  0.95930000   2.34905336
  0.95930000   2.45232884
  0.95930000   2.22197063
  0.95930000   2.68162544
  0.95930000   1.70612766
  0.95930000   2.79916492
  0.95930000   1.49175520
  0.95930000   2.54559386
  0.95930000   2.01085951
  0.95930000   2.89760352
  0.95930000   1.36667799
  0.95930000   2.36311008
  0.95930000   2.42285578
  0.95930000   2.28835910
  0.95930000   2.56673543
  0.95930000   1.95797387
  0.95930000   2.91188218
  0.95930000   1.35424077
  0.95930000   2.34406319
  0.95930000   2.46246037
  0.95940000   1.58532397
  0.95940000   2.66918000
  0.95940000   1.73519342
  0.95940000   2.82625597
  0.95940000   1.45163059
  0.95940000   2.49022317
  0.95940000   2.13937063
  0.95940000   2.79658504
  0.95940000   1.49477964
  0.95940000   2.55095224
  0.95940000   1.99868536
  0.95940000   2.90343005
  0.95940000   1.36182734
  0.95940000   2.35682404
  0.95940000   2.43657393
  0.95940000   2.25796418
  0.95940000   2.62230749
  0.95940000   1.83317382
  0.95940000   2.89084595
  0.95940000   1.37364292
  0.95940000   2.37482152
  0.95940000   2.39837175
  0.95940000   2.34290859
  0.95950000   2.37328489
  0.95950000   2.39785600
  0.95950000   2.34388881
  0.95950000   2.45850565
  0.95950000   2.20749376
  0.95950000   2.70513665
  0.95950000   1.65880121
  0.95950000   2.75453903
  0.95950000   1.56755925
  0.95950000   2.64837068
  0.95950000   1.77993408
  0.95950000   2.86157309
  0.95950000   1.40584746
  0.95950000   2.42440539
  0.95950000   2.28998658
  0.95950000   2.56559357
  0.95950000   1.96133837
  0.95950000   2.91367475
  0.95950000   1.35358892
  0.95950000   2.34529445
  0.95950000   2.46096891
  0.95950000   2.20286925
  0.95950000   2.71236645
  0.95960000   2.36166593
  0.95960000   2.42733158
  0.95960000   2.27953915
  0.95960000   2.58492825
  0.95960000   1.91734769
  0.95960000   2.91654086
  0.95960000   1.35180981
  0.95960000   2.34367506
  0.95960000   2.46485940
  0.95960000   2.19436091
  0.95960000   2.72568828
  0.95960000   1.61912661
  0.95960000   2.71185567
  0.95960000   1.64834779
  0.95960000   2.74468490
  0.95960000   1.58588035
  0.95960000   2.67237664
  0.95960000   1.72901114
  0.95960000   2.82350210
  0.95960000   1.45606731
  0.95960000   2.49892173
  0.95960000   2.11981325
  0.95960000   2.81988622
  0.95970000   2.71107092
  0.95970000   1.65042257
  0.95970000   2.74823762
  0.95970000   1.57972825
  0.95970000   2.66606425
  0.95970000   1.74263883
  0.95970000   2.83617137
  0.95970000   1.43876407
  0.95970000   2.47514901
  0.95970000   2.17516523
  0.95970000   2.75406287
  0.95970000   1.56711370
  0.95970000   2.65023093
  0.95970000   1.77626023
  0.95970000   2.86150448
  0.95970000   1.40654304
  0.95970000   2.42773581
  0.95970000   2.28328614
  0.95970000   2.57928984
  0.95970000   1.93059407
  0.95970000   2.91823695
  0.95970000   1.35088796
  0.95970000   2.34336520
  0.95980000   2.29610843
  0.95980000   2.55518076
  0.95980000   1.98581259
  0.95980000   2.91142609
  0.95980000   1.35649429
  0.95980000   2.35311460
  0.95980000   2.44625712
  0.95980000   2.23751508
  0.95980000   2.65983380
  0.95980000   1.75270619
  0.95980000   2.84517632
  0.95980000   1.42690094
  0.95980000   2.45896454
  0.95980000   2.21256510
  0.95980000   2.70045190
  0.95980000   1.66903467
  0.95980000   2.76900495
  0.95980000   1.54276665
  0.95980000   2.62022782
  0.95980000   1.84230911
  0.95980000   2.90007940
  0.95980000   1.36654518
  0.95980000   2.36852022
  0.95990000   2.48814177
  0.95990000   2.14091348
  0.95990000   2.79824132
  0.95990000   1.49312732
  0.95990000   2.55462067
  0.95990000   1.99143931
  0.95990000   2.91121079
  0.95990000   1.35714862
  0.95990000   2.35524375
  0.95990000   2.44233644
  0.95990000   2.24680930
  0.95990000   2.64486064
  0.95990000   1.78498795
  0.95990000   2.86965560
  0.95990000   1.39759880
  0.95990000   2.41665185
  0.95990000   2.30885967
  0.95990000   2.53173699
  0.95990000   2.04022867
  0.95990000   2.88806850
  0.95990000   1.37762122
  0.95990000   2.38650317
  0.95990000   2.37531490
  0.96000000   2.91637352
  0.96000000   1.35342415
  0.96000000   2.35062950
  0.96000000   2.45248471
  0.96000000   2.22409854
  0.96000000   2.68317585
  0.96000000   1.70434840
  0.96000000   2.80622575
  0.96000000   1.48252021
  0.96000000   2.54108651
  0.96000000   2.02315472
  0.96000000   2.89913205
  0.96000000   1.36776905
  0.96000000   2.37264126
  0.96000000   2.40586601
  0.96000000   2.32899407
  0.96000000   2.49162032
  0.96000000   2.13308088
  0.96000000   2.80805414
  0.96000000   1.47823442
  0.96000000   2.53503615
  0.96000000   2.03692822
  0.96000000   2.89151385
  0.96010000   2.12348880
  0.96010000   2.82044843
  0.96010000   1.46059292
  0.96010000   2.51127566
  0.96010000   2.09260547
  0.96010000   2.85108767
  0.96010000   1.41955221
  0.96010000   2.45163173
  0.96010000   2.23042397
  0.96010000   2.67421665
  0.96010000   1.72327716
  0.96010000   2.82460797
  0.96010000   1.45568558
  0.96010000   2.50424724
  0.96010000   2.10895355
  0.96010000   2.83548262
  0.96010000   1.43966000
  0.96010000   2.48109097
  0.96010000   2.16253883
  0.96010000   2.77387866
  0.96010000   1.53344145
  0.96010000   2.61158812
  0.96010000   1.86212016
  0.96020000   1.99029318
  0.96020000   2.91427425
  0.96020000   1.35574307
  0.96020000   2.35642792
  0.96020000   2.44124282
  0.96020000   2.25037153
  0.96020000   2.64072416
  0.96020000   1.79457700
  0.96020000   2.87950243
  0.96020000   1.38788747
  0.96020000   2.40546449
  0.96020000   2.33503613
  0.96020000   2.48110365
  0.96020000   2.15824360
  0.96020000   2.77949000
  0.96020000   1.52403792
  0.96020000   2.60027477
  0.96020000   1.88771766
  0.96020000   2.91952122
  0.96020000   1.35204889
  0.96020000   2.35073356
  0.96020000   2.45324174
  0.96020000   2.22303006
  0.96030000   2.45674905
  0.96030000   2.21548801
  0.96030000   2.69902453
  0.96030000   1.67280907
  0.96030000   2.77911868
  0.96030000   1.52672508
  0.96030000   2.60513626
  0.96030000   1.87724305
  0.96030000   2.91825531
  0.96030000   1.35345315
  0.96030000   2.35402859
  0.96030000   2.44691551
  0.96030000   2.23790420
  0.96030000   2.66262562
  0.96030000   1.74783526
  0.96030000   2.84755819
  0.96030000   1.42530538
  0.96030000   2.46242184
  0.96030000   2.20636201
  0.96030000   2.71361812
  0.96030000   1.64402208
  0.96030000   2.74858865
  0.96030000   1.58009927
  0.96040000   1.59525126
  0.96040000   2.69364526
  0.96040000   1.68672559
  0.96040000   2.79448824
  0.96040000   1.50205811
  0.96040000   2.57297437
  0.96040000   1.95073219
  0.96040000   2.92555794
  0.96040000   1.34853611
  0.96040000   2.34754961
  0.96040000   2.46097180
  0.96040000   2.20611836
  0.96040000   2.71420502
  0.96040000   1.64295202
  0.96040000   2.74865064
  0.96040000   1.58019770
  0.96040000   2.67520594
  0.96040000   1.72469700
  0.96040000   2.82973228
  0.96040000   1.44944355
  0.96040000   2.49879843
  0.96040000   2.12256577
  0.96040000   2.82400128
  0.96050000   2.57537063
  0.96050000   1.94123676
  0.96050000   2.92697226
  0.96050000   1.34786443
  0.96050000   2.34761335
  0.96050000   2.46125206
  0.96050000   2.20577382
  0.96050000   2.71544326
  0.96050000   1.64073573
  0.96050000   2.74745169
  0.96050000   1.58260085
  0.96050000   2.67940969
  0.96050000   1.71614219
  0.96050000   2.82341975
  0.96050000   1.45858765
  0.96050000   2.51313230
  0.96050000   2.08954245
  0.96050000   2.85756252
  0.96050000   1.41285994
  0.96050000   2.44633268
  0.96050000   2.24395402
  0.96050000   2.65432935
  0.96050000   1.76606247
  0.96060000   2.23113456
  0.96060000   2.67598164
  0.96060000   1.72049126
  0.96060000   2.82838450
  0.96060000   1.45173320
  0.96060000   2.50445123
  0.96060000   2.11001947
  0.96060000   2.83893554
  0.96060000   1.43649110
  0.96060000   2.48232127
  0.96060000   2.16135204
  0.96060000   2.77951039
  0.96060000   1.52517533
  0.96060000   2.60666635
  0.96060000   1.87432942
  0.96060000   2.92097822
  0.96060000   1.35263222
  0.96060000   2.35610925
  0.96060000   2.44396352
  0.96060000   2.24570000
  0.96060000   2.65142280
  0.96060000   1.77231370
  0.96060000   2.86963089
  0.96070000   2.37939089
  0.96070000   2.39017689
  0.96070000   2.36590614
  0.96070000   2.41819739
  0.96070000   2.30332577
  0.96070000   2.54605220
  0.96070000   2.00896684
  0.96070000   2.91244263
  0.96070000   1.35905297
  0.96070000   2.36712261
  0.96070000   2.42086699
  0.96070000   2.29831154
  0.96070000   2.55606679
  0.96070000   1.98598171
  0.96070000   2.92099799
  0.96070000   1.35269912
  0.96070000   2.35731571
  0.96070000   2.44174440
  0.96070000   2.25102839
  0.96070000   2.64282850
  0.96070000   1.79101849
  0.96070000   2.88339297
  0.96070000   1.38554647
  0.96080000   1.79533914
  0.96080000   2.88766047
  0.96080000   1.38187691
  0.96080000   2.40321164
  0.96080000   2.34273479
  0.96080000   2.46849306
  0.96080000   2.18945189
  0.96080000   2.74179633
  0.96080000   1.59143926
  0.96080000   2.69387208
  0.96080000   1.68684572
  0.96080000   2.79955845
  0.96080000   1.49496428
  0.96080000   2.56797767
  0.96080000   1.96313923
  0.96080000   2.92818901
  0.96080000   1.34838216
  0.96080000   2.35176671
  0.96080000   2.45408302
  0.96080000   2.22328687
  0.96080000   2.69010146
  0.96080000   1.69178083
  0.96080000   2.80424095
  0.96090000   2.42585032
  0.96090000   2.28803466
  0.96090000   2.57700286
  0.96090000   1.93855889
  0.96090000   2.93164965
  0.96090000   1.34651764
  0.96090000   2.34998426
  0.96090000   2.45828239
  0.96090000   2.21398986
  0.96090000   2.70563389
  0.96090000   1.66081050
  0.96090000   2.77412555
  0.96090000   1.53648945
  0.96090000   2.62537113
  0.96090000   1.83331200
  0.96090000   2.90938931
  0.96090000   1.36272234
  0.96090000   2.37503564
  0.96090000   2.40492868
  0.96090000   2.33487194
  0.96090000   2.48440639
  0.96090000   2.15265429
  0.96090000   2.79224204
  0.96100000   2.22737990
  0.96100000   2.68449708
  0.96100000   1.70351181
  0.96100000   2.81790174
  0.96100000   1.46765454
  0.96100000   2.53198697
  0.96100000   2.04700652
  0.96100000   2.89539322
  0.96100000   1.37472132
  0.96100000   2.39456205
  0.96100000   2.36259054
  0.96100000   2.42760718
  0.96100000   2.28359739
  0.96100000   2.58563917
  0.96100000   1.91892624
  0.96100000   2.93267858
  0.96100000   1.34629020
  0.96100000   2.35073551
  0.96100000   2.45712504
  0.96100000   2.21693020
  0.96100000   2.70164755
  0.96100000   1.66888828
  0.96100000   2.78379316
  0.96110000   2.52855236
  0.96110000   2.05106831
  0.96110000   2.89314417
  0.96110000   1.37703112
  0.96110000   2.39922103
  0.96110000   2.35266988
  0.96110000   2.44911489
  0.96110000   2.23498655
  0.96110000   2.67273903
  0.96110000   1.72812572
  0.96110000   2.84123244
  0.96110000   1.43577074
  0.96110000   2.48711079
  0.96110000   2.15186785
  0.96110000   2.79571417
  0.96110000   1.50018807
  0.96110000   2.57876349
  0.96110000   1.93890832
  0.96110000   2.93427760
  0.96110000   1.34584458
  0.96110000   2.35117061
  0.96110000   2.45679598
  0.96110000   2.21809970
  0.96120000   2.57095371
  0.96120000   1.95341168
  0.96120000   2.93375831
  0.96120000   1.34651994
  0.96120000   2.35334250
  0.96120000   2.45273704
  0.96120000   2.22783357
  0.96120000   2.68554633
  0.96120000   1.70194531
  0.96120000   2.81896369
  0.96120000   1.46668617
  0.96120000   2.53298425
  0.96120000   2.04525078
  0.96120000   2.89853817
  0.96120000   1.37263172
  0.96120000   2.39363192
  0.96120000   2.36550335
  0.96120000   2.42232756
  0.96120000   2.29630760
  0.96120000   2.56263173
  0.96120000   1.97205912
  0.96120000   2.93016337
  0.96120000   1.34861732
  0.96130000   2.51991484
  0.96130000   2.07618712
  0.96130000   2.87671906
  0.96130000   1.39405055
  0.96130000   2.42736671
  0.96130000   2.29032865
  0.96130000   2.57567961
  0.96130000   1.94277513
  0.96130000   2.93595366
  0.96130000   1.34565229
  0.96130000   2.35310418
  0.96130000   2.45369649
  0.96130000   2.22595111
  0.96130000   2.68929996
  0.96130000   1.69445390
  0.96130000   2.81308257
  0.96130000   1.47552236
  0.96130000   2.54672077
  0.96130000   2.01353480
  0.96130000   2.91727344
  0.96130000   1.35790453
  0.96130000   2.37210411
  0.96130000   2.41304084
  0.96140000   2.36378045
  0.96140000   2.43158991
  0.96140000   2.27699249
  0.96140000   2.60075793
  0.96140000   1.88582927
  0.96140000   2.93297334
  0.96140000   1.34791664
  0.96140000   2.35774416
  0.96140000   2.44436560
  0.96140000   2.24773687
  0.96140000   2.65326416
  0.96140000   1.77007532
  0.96140000   2.87797332
  0.96140000   1.39354518
  0.96140000   2.42773052
  0.96140000   2.28982919
  0.96140000   2.57714798
  0.96140000   1.93958361
  0.96140000   2.93725448
  0.96140000   1.34531846
  0.96140000   2.35369285
  0.96140000   2.45288276
  0.96140000   2.22812255
  0.96150000   2.49376443
  0.96150000   2.13768994
  0.96150000   2.81644976
  0.96150000   1.47000402
  0.96150000   2.54127814
  0.96150000   2.02672234
  0.96150000   2.91268142
  0.96150000   1.36215037
  0.96150000   2.38092142
  0.96150000   2.39483636
  0.96150000   2.35983649
  0.96150000   2.43519567
  0.96150000   2.26806675
  0.96150000   2.61738412
  0.96150000   1.84857732
  0.96150000   2.92279136
  0.96150000   1.35491390
  0.96150000   2.36971354
  0.96150000   2.41910261
  0.96150000   2.30549933
  0.96150000   2.54667602
  0.96150000   2.00977017
  0.96150000   2.92049348
  0.96160000   2.49804833
  0.96160000   2.12799838
  0.96160000   2.82852955
  0.96160000   1.45326970
  0.96160000   2.51846206
  0.96160000   2.08024353
  0.96160000   2.87605144
  0.96160000   1.39570466
  0.96160000   2.43330205
  0.96160000   2.27790775
  0.96160000   2.60086265
  0.96160000   1.88620910
  0.96160000   2.93543386
  0.96160000   1.34732388
  0.96160000   2.35905618
  0.96160000   2.44251547
  0.96160000   2.25268744
  0.96160000   2.64590591
  0.96160000   1.78631972
  0.96160000   2.89150149
  0.96160000   1.38083481
  0.96160000   2.41070725
  0.96160000   2.32909951
  0.96170000   2.37173904
  0.96170000   2.41583688
  0.96170000   2.31384025
  0.96170000   2.53142005
  0.96170000   2.04586748
  0.96170000   2.90253725
  0.96170000   1.37091570
  0.96170000   2.39666394
  0.96170000   2.36089092
  0.96170000   2.43457692
  0.96170000   2.27045111
  0.96170000   2.61436306
  0.96170000   1.85580186
  0.96170000   2.92790049
  0.96170000   1.35235093
  0.96170000   2.36798564
  0.96170000   2.42378049
  0.96170000   2.29572494
  0.96170000   2.56689740
  0.96170000   1.96360235
  0.96170000   2.93750331
  0.96170000   1.34643627
  0.96170000   2.35878158
  0.96180000   2.43956899
  0.96180000   2.26451749
  0.96180000   2.62685900
  0.96180000   1.82871916
  0.96180000   2.91797152
  0.96180000   1.35964891
  0.96180000   2.38043904
  0.96180000   2.39728646
  0.96180000   2.35572125
  0.96180000   2.44543633
  0.96180000   2.24577317
  0.96180000   2.65901593
  0.96180000   1.75849066
  0.96180000   2.87443340
  0.96180000   1.39859739
  0.96180000   2.43995682
  0.96180000   2.26339612
  0.96180000   2.62871204
  0.96180000   1.82448765
  0.96180000   2.91585964
  0.96180000   1.36114388
  0.96180000   2.38273626
  0.96180000   2.39214749
  0.96190000   2.87349760
  0.96190000   1.39943590
  0.96190000   2.44239887
  0.96190000   2.25824599
  0.96190000   2.63871748
  0.96190000   1.80286326
  0.96190000   2.90547944
  0.96190000   1.36970776
  0.96190000   2.39708518
  0.96190000   2.36093957
  0.96190000   2.43550613
  0.96190000   2.26913446
  0.96190000   2.61806281
  0.96190000   1.84802475
  0.96190000   2.92742321
  0.96190000   1.35351635
  0.96190000   2.37204321
  0.96190000   2.41593757
  0.96190000   2.31426768
  0.96190000   2.53153810
  0.96190000   2.04602774
  0.96190000   2.90434310
  0.96190000   1.37012006
  0.96200000   2.24851975
  0.96200000   2.65596974
  0.96200000   1.76562870
  0.96200000   2.88226322
  0.96200000   1.39126728
  0.96200000   2.43117591
  0.96200000   2.28435836
  0.96200000   2.59119978
  0.96200000   1.90904049
  0.96200000   2.94362684
  0.96200000   1.34464356
  0.96200000   2.35935328
  0.96200000   2.44381197
  0.96200000   2.25120102
  0.96200000   2.65116153
  0.96200000   1.77584743
  0.96200000   2.88945501
  0.96200000   1.38421311
  0.96200000   2.42043056
  0.96200000   2.30875712
  0.96200000   2.54377597
  0.96200000   2.01808199
  0.96200000   2.92181090
  0.96210000   2.74794221
  0.96210000   1.58545602
  0.96210000   2.70274381
  0.96210000   1.67194337
  0.96210000   2.80091074
  0.96210000   1.49623590
  0.96210000   2.58539281
  0.96210000   1.92640046
  0.96210000   2.94606209
  0.96210000   1.34399291
  0.96210000   2.35946922
  0.96210000   2.44415067
  0.96210000   2.25086708
  0.96210000   2.65246165
  0.96210000   1.77330623
  0.96210000   2.88894981
  0.96210000   1.38506768
  0.96210000   2.42288155
  0.96210000   2.30360542
  0.96210000   2.55454324
  0.96210000   1.99339559
  0.96210000   2.93362143
  0.96210000   1.35039397
  0.96220000   1.34403185
  0.96220000   2.36063994
  0.96220000   2.44204501
  0.96220000   2.25604122
  0.96220000   2.64393333
  0.96220000   1.79193181
  0.96220000   2.90252398
  0.96220000   1.37328757
  0.96220000   2.40599269
  0.96220000   2.34223725
  0.96220000   2.47657073
  0.96220000   2.17537850
  0.96220000   2.77267261
  0.96220000   1.54009426
  0.96220000   2.64594577
  0.96220000   1.79073623
  0.96220000   2.90197455
  0.96220000   1.37383570
  0.96220000   2.40683689
  0.96220000   2.34035646
  0.96220000   2.48049794
  0.96220000   2.16621981
  0.96220000   2.78525570
  0.96230000   2.43713547
  0.96230000   2.26771857
  0.96230000   2.62346600
  0.96230000   1.83707123
  0.96230000   2.92780224
  0.96230000   1.35502238
  0.96230000   2.37889472
  0.96230000   2.40289055
  0.96230000   2.34531825
  0.96230000   2.46990952
  0.96230000   2.19097250
  0.96230000   2.75088109
  0.96230000   1.57815570
  0.96230000   2.69604036
  0.96230000   1.68552538
  0.96230000   2.81703966
  0.96230000   1.47253474
  0.96230000   2.55442583
  0.96230000   1.99830412
  0.96230000   2.93440442
  0.96230000   1.35091772
  0.96230000   2.37250725
  0.96230000   2.41681804
  0.96240000   2.39378924
  0.96240000   2.36613099
  0.96240000   2.42605850
  0.96240000   2.29243733
  0.96240000   2.57713362
  0.96240000   1.94176857
  0.96240000   2.94834104
  0.96240000   1.34416447
  0.96240000   2.36307677
  0.96240000   2.43768209
  0.96240000   2.26673762
  0.96240000   2.62580633
  0.96240000   1.83203291
  0.96240000   2.92673162
  0.96240000   1.35610401
  0.96240000   2.38169426
  0.96240000   2.39712806
  0.96240000   2.35856196
  0.96240000   2.44222243
  0.96240000   2.25530968
  0.96240000   2.64613229
  0.96240000   1.78737560
  0.96240000   2.90204189
  0.96250000   2.43630812
  0.96250000   2.27037932
  0.96250000   2.61982501
  0.96250000   1.84560508
  0.96250000   2.93378194
  0.96250000   1.35226168
  0.96250000   2.37685070
  0.96250000   2.40828033
  0.96250000   2.33405181
  0.96250000   2.49448581
  0.96250000   2.13433981
  0.96250000   2.82812647
  0.96250000   1.45605050
  0.96250000   2.53310906
  0.96250000   2.04835659
  0.96250000   2.90934827
  0.96250000   1.36858022
  0.96250000   2.40215201
  0.96250000   2.35204364
  0.96250000   2.45733416
  0.96250000   2.22103108
  0.96250000   2.70555587
  0.96250000   1.66418183
  0.96260000   2.46488620
  0.96260000   2.20855401
  0.96260000   2.72714011
  0.96260000   1.62288744
  0.96260000   2.75354187
  0.96260000   1.57631467
  0.96260000   2.69755239
  0.96260000   1.68336384
  0.96260000   2.81871809
  0.96260000   1.47101844
  0.96260000   2.55586520
  0.96260000   1.99581360
  0.96260000   2.93861701
  0.96260000   1.34994340
  0.96260000   2.37436731
  0.96260000   2.41418954
  0.96260000   2.32112956
  0.96260000   2.52158118
  0.96260000   2.07128684
  0.96260000   2.89240652
  0.96260000   1.38305435
  0.96260000   2.42552051
  0.96260000   2.29939669
  0.96270000   2.40361612
  0.96270000   2.34984496
  0.96270000   2.46318741
  0.96270000   2.20831362
  0.96270000   2.72753168
  0.96270000   1.62215136
  0.96270000   2.75391952
  0.96270000   1.57581828
  0.96270000   2.69816135
  0.96270000   1.68232373
  0.96270000   2.81893342
  0.96270000   1.47097409
  0.96270000   2.55699539
  0.96270000   1.99343349
  0.96270000   2.94057947
  0.96270000   1.34936732
  0.96270000   2.37459139
  0.96270000   2.41415267
  0.96270000   2.32161382
  0.96270000   2.52113156
  0.96270000   2.07262132
  0.96270000   2.89225621
  0.96270000   1.38355356
  0.96280000   2.37157180
  0.96280000   2.42133660
  0.96280000   2.30581561
  0.96280000   2.55360363
  0.96280000   1.99729540
  0.96280000   2.93961802
  0.96280000   1.35021038
  0.96280000   2.37702561
  0.96280000   2.40920616
  0.96280000   2.33317816
  0.96280000   2.49785475
  0.96280000   2.12739048
  0.96280000   2.83882269
  0.96280000   1.44273278
  0.96280000   2.51727496
  0.96280000   2.08633167
  0.96280000   2.88185967
  0.96280000   1.39386598
  0.96280000   2.44431738
  0.96280000   2.25699947
  0.96280000   2.64666297
  0.96280000   1.78743993
  0.96280000   2.90711455
  0.96290000   1.34388323
  0.96290000   2.36825277
  0.96290000   2.42892428
  0.96290000   2.28880163
  0.96290000   2.58744039
  0.96290000   1.91954678
  0.96290000   2.95465960
  0.96290000   1.34391852
  0.96290000   2.36829919
  0.96290000   2.42876035
  0.96290000   2.28911686
  0.96290000   2.58677769
  0.96290000   1.92100995
  0.96290000   2.95467111
  0.96290000   1.34389711
  0.96290000   2.36825981
  0.96290000   2.42880328
  0.96290000   2.28897831
  0.96290000   2.58700815
  0.96290000   1.92044985
  0.96290000   2.95463772
  0.96290000   1.34389991
  0.96290000   2.36826021
  0.96300000   1.69058027
  0.96300000   2.83072209
  0.96300000   1.45530407
  0.96300000   2.53801327
  0.96300000   2.03852732
  0.96300000   2.92099811
  0.96300000   1.36224545
  0.96300000   2.39803725
  0.96300000   2.36349631
  0.96300000   2.43528422
  0.96300000   2.27383706
  0.96300000   2.61622670
  0.96300000   1.85460634
  0.96300000   2.94314334
  0.96300000   1.34948134
  0.96300000   2.37813048
  0.96300000   2.40767807
  0.96300000   2.33742622
  0.96300000   2.49000344
  0.96300000   2.14635782
  0.96300000   2.81765863
  0.96300000   1.47197978
  0.96300000   2.56195729
  0.96310000   1.36903062
  0.96310000   2.40969428
  0.96310000   2.33766497
  0.96310000   2.49084204
  0.96310000   2.14506297
  0.96310000   2.82030583
  0.96310000   1.46861127
  0.96310000   2.55835758
  0.96310000   1.99106984
  0.96310000   2.94566683
  0.96310000   1.34870624
  0.96310000   2.37805602
  0.96310000   2.40835426
  0.96310000   2.33636576
  0.96310000   2.49278397
  0.96310000   2.14020303
  0.96310000   2.82617693
  0.96310000   1.46038983
  0.96310000   2.54651479
  0.96310000   2.01861609
  0.96310000   2.93342643
  0.96310000   1.35494689
  0.96310000   2.38779875
  0.96320000   2.70313309
  0.96320000   1.67325688
  0.96320000   2.81604858
  0.96320000   1.47647766
  0.96320000   2.57083606
  0.96320000   1.96259937
  0.96320000   2.95490549
  0.96320000   1.34534527
  0.96320000   2.37392064
  0.96320000   2.41796708
  0.96320000   2.31501491
  0.96320000   2.53731811
  0.96320000   2.03623596
  0.96320000   2.92380639
  0.96320000   1.36109545
  0.96320000   2.39850007
  0.96320000   2.36316843
  0.96320000   2.43684761
  0.96320000   2.27091870
  0.96320000   2.62285956
  0.96320000   1.84023201
  0.96320000   2.94001780
  0.96320000   1.35195629
  0.96330000   1.37256336
  0.96330000   2.41744082
  0.96330000   2.32089030
  0.96330000   2.52665824
  0.96330000   2.06174239
  0.96330000   2.90698426
  0.96330000   1.37350539
  0.96330000   2.41887303
  0.96330000   2.31746470
  0.96330000   2.53353265
  0.96330000   2.04556383
  0.96330000   2.91875950
  0.96330000   1.36487601
  0.96330000   2.40551087
  0.96330000   2.34780082
  0.96330000   2.47033785
  0.96330000   2.19357038
  0.96330000   2.75465626
  0.96330000   1.57371928
  0.96330000   2.70287277
  0.96330000   1.67389538
  0.96330000   2.81792588
  0.96330000   1.47398599
  0.96340000   2.24334293
  0.96340000   2.67400936
  0.96340000   1.73031747
  0.96340000   2.87192844
  0.96340000   1.40672208
  0.96340000   2.47075602
  0.96340000   2.19766990
  0.96340000   2.75001146
  0.96340000   1.58249102
  0.96340000   2.71512924
  0.96340000   1.64999783
  0.96340000   2.79401181
  0.96340000   1.51021740
  0.96340000   2.62044404
  0.96340000   1.84991964
  0.96340000   2.94666764
  0.96340000   1.34981414
  0.96340000   2.38317488
  0.96340000   2.39845488
  0.96340000   2.35996430
  0.96340000   2.44411265
  0.96340000   2.25471159
  0.96340000   2.65376395
  0.96350000   2.39924496
  0.96350000   2.35770125
  0.96350000   2.44920426
  0.96350000   2.24318944
  0.96350000   2.67487580
  0.96350000   1.72866995
  0.96350000   2.87176690
  0.96350000   1.40721194
  0.96350000   2.47265390
  0.96350000   2.19352382
  0.96350000   2.75705719
  0.96350000   1.57020587
  0.96350000   2.70094844
  0.96350000   1.67826986
  0.96350000   2.82491191
  0.96350000   1.46475620
  0.96350000   2.55763750
  0.96350000   1.99397786
  0.96350000   2.94892686
  0.96350000   1.34915191
  0.96350000   2.38326077
  0.96350000   2.39864002
  0.96350000   2.35993328
  0.96360000   2.58599589
  0.96360000   1.92857439
  0.96360000   2.96322984
  0.96360000   1.34452734
  0.96360000   2.37713600
  0.96360000   2.41274882
  0.96360000   2.32853559
  0.96360000   2.51178479
  0.96360000   2.09722408
  0.96360000   2.87831960
  0.96360000   1.40005633
  0.96360000   2.46296998
  0.96360000   2.21641573
  0.96360000   2.72174203
  0.96360000   1.63528282
  0.96360000   2.78016135
  0.96360000   1.53285714
  0.96360000   2.65356079
  0.96360000   1.77745714
  0.96360000   2.91071199
  0.96360000   1.37238767
  0.96360000   2.42058130
  0.96360000   2.31486717
  0.96370000   2.96047549
  0.96370000   1.34585486
  0.96370000   2.38034874
  0.96370000   2.40608077
  0.96370000   2.34407562
  0.96370000   2.47968482
  0.96370000   2.17290137
  0.96370000   2.78798281
  0.96370000   1.51863055
  0.96370000   2.63554042
  0.96370000   1.81680467
  0.96370000   2.93550079
  0.96370000   1.35673167
  0.96370000   2.39738383
  0.96370000   2.36797898
  0.96370000   2.42885318
  0.96370000   2.29129959
  0.96370000   2.58706543
  0.96370000   1.92218681
  0.96370000   2.96387761
  0.96370000   1.34472550
  0.96370000   2.37854574
  0.96370000   2.40988341
  0.96380000   2.27399961
  0.96380000   2.62185012
  0.96380000   1.84426030
  0.96380000   2.94907643
  0.96380000   1.35060634
  0.96380000   2.38893070
  0.96380000   2.38738835
  0.96380000   2.38648401
  0.96380000   2.38776904
  0.96380000   2.38465665
  0.96380000   2.39147427
  0.96380000   2.37619634
  0.96380000   2.41010847
  0.96380000   2.33408915
  0.96380000   2.50072030
  0.96380000   2.12352100
  0.96380000   2.85187137
  0.96380000   1.42955677
  0.96380000   2.50961902
  0.96380000   2.10723591
  0.96380000   2.87051156
  0.96380000   1.40885443
  0.96380000   2.47861899
  0.96390000   2.28892617
  0.96390000   2.59394319
  0.96390000   1.90742374
  0.96390000   2.96565949
  0.96390000   1.34531925
  0.96390000   2.38175240
  0.96390000   2.40382489
  0.96390000   2.34998997
  0.96390000   2.46805567
  0.96390000   2.20079437
  0.96390000   2.74803126
  0.96390000   1.58689483
  0.96390000   2.72677388
  0.96390000   1.62854396
  0.96390000   2.77638195
  0.96390000   1.53997153
  0.96390000   2.66673476
  0.96390000   1.74995378
  0.96390000   2.89441523
  0.96390000   1.38686790
  0.96390000   2.44633467
  0.96390000   2.25652820
  0.96390000   2.65474900
  0.96400000   1.69136732
  0.96400000   2.84407275
  0.96400000   1.44089648
  0.96400000   2.52881968
  0.96400000   2.06290045
  0.96400000   2.91349289
  0.96400000   1.37157949
  0.96400000   2.42391014
  0.96400000   2.30876617
  0.96400000   2.55509040
  0.96400000   1.99716656
  0.96400000   2.95251058
  0.96400000   1.35003077
  0.96400000   2.39027783
  0.96400000   2.38513334
  0.96400000   2.39231991
  0.96400000   2.37554212
  0.96400000   2.41264138
  0.96400000   2.32923752
  0.96400000   2.51196123
  0.96400000   2.09772937
  0.96400000   2.88134906
  0.96400000   1.39842753
  0.96410000   2.14383972
  0.96410000   2.83032560
  0.96410000   1.45777368
  0.96410000   2.55468632
  0.96410000   2.00229005
  0.96410000   2.95187477
  0.96410000   1.35083899
  0.96410000   2.39269041
  0.96410000   2.38024834
  0.96410000   2.40370229
  0.96410000   2.35037120
  0.96410000   2.46798174
  0.96410000   2.20153048
  0.96410000   2.74830306
  0.96410000   1.58682526
  0.96410000   2.72917428
  0.96410000   1.62440599
  0.96410000   2.77414644
  0.96410000   1.54417755
  0.96410000   2.67475854
  0.96410000   1.73344849
  0.96410000   2.88358266
  0.96410000   1.39756274
  0.96420000   2.80600365
  0.96420000   1.49222475
  0.96420000   2.60511513
  0.96420000   1.88608535
  0.96420000   2.96648734
  0.96420000   1.34669637
  0.96420000   2.38730489
  0.96420000   2.39279548
  0.96420000   2.37614436
  0.96420000   2.41253153
  0.96420000   2.33046937
  0.96420000   2.51055314
  0.96420000   2.10171781
  0.96420000   2.87919069
  0.96420000   1.40127093
  0.96420000   2.47177821
  0.96420000   2.19774804
  0.96420000   2.75576921
  0.96420000   1.57403220
  0.96420000   2.71447241
  0.96420000   1.65295782
  0.96420000   2.80727823
  0.96420000   1.49198079
  0.96430000   2.38296409
  0.96430000   2.39861331
  0.96430000   2.36278475
  0.96430000   2.44214990
  0.96430000   2.26257414
  0.96430000   2.64525356
  0.96430000   1.79348460
  0.96430000   2.92948025
  0.96430000   1.36271244
  0.96430000   2.41353275
  0.96430000   2.33374197
  0.96430000   2.50522407
  0.96430000   2.11493771
  0.96430000   2.86615525
  0.96430000   1.41509255
  0.96430000   2.49386932
  0.96430000   2.14602387
  0.96430000   2.82976539
  0.96430000   1.45917632
  0.96430000   2.55910568
  0.96430000   1.99243207
  0.96430000   2.95803880
  0.96430000   1.34959981
  0.96440000   1.43712972
  0.96440000   2.52802232
  0.96440000   2.06604513
  0.96440000   2.91492151
  0.96440000   1.37225666
  0.96440000   2.42954979
  0.96440000   2.29735819
  0.96440000   2.58023444
  0.96440000   1.93997468
  0.96440000   2.97128747
  0.96440000   1.34654293
  0.96440000   2.38931297
  0.96440000   2.38909043
  0.96440000   2.38528331
  0.96440000   2.39308758
  0.96440000   2.37535109
  0.96440000   2.41482104
  0.96440000   2.32585488
  0.96440000   2.52111607
  0.96440000   2.07736418
  0.96440000   2.90431858
  0.96440000   1.37983717
  0.96440000   2.44124153
  0.96450000   2.33055950
  0.96450000   2.51198298
  0.96450000   2.09930004
  0.96450000   2.88445476
  0.96450000   1.39733483
  0.96450000   2.46927961
  0.96450000   2.20470237
  0.96450000   2.74715104
  0.96450000   1.59009524
  0.96450000   2.73824057
  0.96450000   1.60842503
  0.96450000   2.76048585
  0.96450000   1.56855010
  0.96450000   2.71133936
  0.96450000   1.65996745
  0.96450000   2.81860905
  0.96450000   1.47643931
  0.96450000   2.58642243
  0.96450000   1.92977266
  0.96450000   2.97349979
  0.96450000   1.34669409
  0.96450000   2.39068566
  0.96450000   2.38648769
  0.96460000   2.14838560
  0.96460000   2.82945790
  0.96460000   1.46058244
  0.96460000   2.56476748
  0.96460000   1.98012910
  0.96460000   2.96571213
  0.96460000   1.34893145
  0.96460000   2.39535068
  0.96460000   2.37643413
  0.96460000   2.41446119
  0.96460000   2.32795238
  0.96460000   2.51805920
  0.96460000   2.08530389
  0.96460000   2.89905525
  0.96460000   1.38487521
  0.96460000   2.45132675
  0.96460000   2.24717524
  0.96460000   2.67607127
  0.96460000   1.72881939
  0.96460000   2.88578606
  0.96460000   1.39718088
  0.96460000   2.47021564
  0.96460000   2.20295630
  0.96470000   2.34154487
  0.96470000   2.48994981
  0.96470000   2.15194319
  0.96470000   2.82470067
  0.96470000   1.46699801
  0.96470000   2.57521887
  0.96470000   1.95591131
  0.96470000   2.97282203
  0.96470000   1.34786794
  0.96470000   2.39479693
  0.96470000   2.37806407
  0.96470000   2.41125506
  0.96470000   2.33565799
  0.96470000   2.50235755
  0.96470000   2.12259439
  0.96470000   2.86092374
  0.96470000   1.42211073
  0.96470000   2.50911071
  0.96470000   2.11117388
  0.96470000   2.87444384
  0.96470000   1.40792410
  0.96470000   2.48772660
  0.96470000   2.16184806
  0.96480000   2.01068505
  0.96480000   2.95486388
  0.96480000   1.35312462
  0.96480000   2.40421116
  0.96480000   2.35709507
  0.96480000   2.45783966
  0.96480000   2.22808528
  0.96480000   2.71004889
  0.96480000   1.66034766
  0.96480000   2.82264117
  0.96480000   1.47145847
  0.96480000   2.58287781
  0.96480000   1.93859301
  0.96480000   2.97634452
  0.96480000   1.34781390
  0.96480000   2.39584266
  0.96480000   2.37613077
  0.96480000   2.41600104
  0.96480000   2.32518577
  0.96480000   2.52485345
  0.96480000   2.06983831
  0.96480000   2.91474648
  0.96480000   1.37383189
  0.96490000   2.28281819
  0.96490000   2.61082869
  0.96490000   1.87114770
  0.96490000   2.97110877
  0.96490000   1.34926122
  0.96490000   2.39925512
  0.96490000   2.36879888
  0.96490000   2.43268492
  0.96490000   2.28709949
  0.96490000   2.60242055
  0.96490000   1.89008945
  0.96490000   2.97510299
  0.96490000   1.34850458
  0.96490000   2.39805204
  0.96490000   2.37146328
  0.96490000   2.42674465
  0.96490000   2.30079886
  0.96490000   2.57524981
  0.96490000   1.95230105
  0.96490000   2.97518210
  0.96490000   1.34845219
  0.96490000   2.39796265
  0.96490000   2.37160165
  0.96500000   1.92206485
  0.96500000   2.97904654
  0.96500000   1.34850753
  0.96500000   2.39920504
  0.96500000   2.36937355
  0.96500000   2.43192255
  0.96500000   2.28928534
  0.96500000   2.59876207
  0.96500000   1.89866393
  0.96500000   2.97752282
  0.96500000   1.34868298
  0.96500000   2.39946838
  0.96500000   2.36868360
  0.96500000   2.43336357
  0.96500000   2.28586889
  0.96500000   2.60538748
  0.96500000   1.88357076
  0.96500000   2.97509156
  0.96500000   1.34904493
  0.96500000   2.40003419
  0.96500000   2.36735975
  0.96500000   2.43624321
  0.96500000   2.27914298
  0.96510000   2.35822779
  0.96510000   2.45692984
  0.96510000   2.23136350
  0.96510000   2.70657219
  0.96510000   1.66788542
  0.96510000   2.83436162
  0.96510000   1.45662026
  0.96510000   2.56499179
  0.96510000   1.98092073
  0.96510000   2.97089831
  0.96510000   1.35038594
  0.96510000   2.40330533
  0.96510000   2.36045295
  0.96510000   2.45197812
  0.96510000   2.24288079
  0.96510000   2.68631581
  0.96510000   1.70853641
  0.96510000   2.87414176
  0.96510000   1.41033025
  0.96510000   2.49606585
  0.96510000   2.14347234
  0.96510000   2.83981409
  0.96510000   1.44858525
  0.96520000   1.72877920
  0.96520000   2.89333859
  0.96520000   1.39268257
  0.96520000   2.47031557
  0.96520000   2.20483918
  0.96520000   2.75221269
  0.96520000   1.58274733
  0.96520000   2.73791421
  0.96520000   1.61065802
  0.96520000   2.77194870
  0.96520000   1.55062709
  0.96520000   2.69687384
  0.96520000   1.69034373
  0.96520000   2.85841804
  0.96520000   1.42777215
  0.96520000   2.52354602
  0.96520000   2.07879729
  0.96520000   2.91152540
  0.96520000   1.37792829
  0.96520000   2.44753604
  0.96520000   2.25836521
  0.96520000   2.65976755
  0.96520000   1.76453849
  0.96530000   1.35021629
  0.96530000   2.40532304
  0.96530000   2.35679612
  0.96530000   2.46103745
  0.96530000   2.22243062
  0.96530000   2.72322231
  0.96530000   1.63605778
  0.96530000   2.80244822
  0.96530000   1.50206892
  0.96530000   2.63232519
  0.96530000   1.82768435
  0.96530000   2.96057340
  0.96530000   1.35402898
  0.96530000   2.41132515
  0.96530000   2.34297229
  0.96530000   2.49085180
  0.96530000   2.15202248
  0.96530000   2.82966271
  0.96530000   1.46211895
  0.96530000   2.57536368
  0.96530000   1.95705333
  0.96530000   2.97930254
  0.96530000   1.35013835
  0.96540000   2.34278908
  0.96540000   2.49178425
  0.96540000   2.15018927
  0.96540000   2.83297613
  0.96540000   1.45811764
  0.96540000   2.57075189
  0.96540000   1.96809738
  0.96540000   2.97793480
  0.96540000   1.35087215
  0.96540000   2.40747714
  0.96540000   2.35215101
  0.96540000   2.47152580
  0.96540000   2.19798283
  0.96540000   2.76372855
  0.96540000   1.56290163
  0.96540000   2.71521483
  0.96540000   1.65412375
  0.96540000   2.82370425
  0.96540000   1.47186397
  0.96540000   2.59071024
  0.96540000   1.92203449
  0.96540000   2.98401319
  0.96540000   1.35027493
  0.96550000   1.99853248
  0.96550000   2.96847165
  0.96550000   1.35302043
  0.96550000   2.41201568
  0.96550000   2.34218647
  0.96550000   2.49357457
  0.96550000   2.14625250
  0.96550000   2.83894931
  0.96550000   1.45077811
  0.96550000   2.56120035
  0.96550000   1.99064132
  0.96550000   2.97167167
  0.96550000   1.35237233
  0.96550000   2.41098078
  0.96550000   2.34448890
  0.96550000   2.48855663
  0.96550000   2.15805723
  0.96550000   2.82316256
  0.96550000   1.47141827
  0.96550000   2.59122851
  0.96550000   1.92084745
  0.96550000   2.98509962
  0.96550000   1.35075487
  0.96560000   1.84167149
  0.96560000   2.97002945
  0.96560000   1.35327711
  0.96560000   2.41355796
  0.96560000   2.33906453
  0.96560000   2.50078316
  0.96560000   2.12951221
  0.96560000   2.86080931
  0.96560000   1.42533889
  0.96560000   2.52459960
  0.96560000   2.07722180
  0.96560000   2.91667171
  0.96560000   1.37607239
  0.96560000   2.44926499
  0.96560000   2.25574073
  0.96560000   2.66718776
  0.96560000   1.74966913
  0.96560000   2.91538302
  0.96560000   1.37728004
  0.96560000   2.45113978
  0.96560000   2.25137893
  0.96560000   2.67518248
  0.96560000   1.73289086
  0.96570000   1.42616243
  0.96570000   2.52703366
  0.96570000   2.07181306
  0.96570000   2.92249214
  0.96570000   1.37284643
  0.96570000   2.44540275
  0.96570000   2.26523752
  0.96570000   2.65020574
  0.96570000   1.78621312
  0.96570000   2.94248043
  0.96570000   1.36257184
  0.96570000   2.42932027
  0.96570000   2.30286932
  0.96570000   2.57663283
  0.96570000   1.95147955
  0.96570000   2.98444395
  0.96570000   1.35189949
  0.96570000   2.41249737
  0.96570000   2.34174524
  0.96570000   2.49542030
  0.96570000   2.14241183
  0.96570000   2.84551281
  0.96570000   1.44326851
  0.96580000   2.04605118
  0.96580000   2.94352853
  0.96580000   1.36238106
  0.96580000   2.43016919
  0.96580000   2.30123002
  0.96580000   2.58052199
  0.96580000   1.94275549
  0.96580000   2.98687899
  0.96580000   1.35236345
  0.96580000   2.41437332
  0.96580000   2.33785818
  0.96580000   2.50429134
  0.96580000   2.12173937
  0.96580000   2.87173307
  0.96580000   1.41445141
  0.96580000   2.51052887
  0.96580000   2.11115464
  0.96580000   2.88438014
  0.96580000   1.40234565
  0.96580000   2.49210963
  0.96580000   2.15498558
  0.96580000   2.83049718
  0.96580000   1.46266430
  0.96590000   1.60938881
  0.96590000   2.77920026
  0.96590000   1.54026307
  0.96590000   2.69185707
  0.96590000   1.70205835
  0.96590000   2.87851010
  0.96590000   1.40907045
  0.96590000   2.50357573
  0.96590000   2.12829127
  0.96590000   2.86562736
  0.96590000   1.42132822
  0.96590000   2.52213059
  0.96590000   2.08403206
  0.96590000   2.91325136
  0.96590000   1.37965616
  0.96590000   2.45830617
  0.96590000   2.23552091
  0.96590000   2.70558437
  0.96590000   1.67179459
  0.96590000   2.84856187
  0.96590000   1.44139089
  0.96590000   2.55214394
  0.96590000   2.01309900
  0.96600000   1.73426253
  0.96600000   2.90810738
  0.96600000   1.38413044
  0.96600000   2.46641873
  0.96600000   2.21681153
  0.96600000   2.73845973
  0.96600000   1.60941172
  0.96600000   2.78047798
  0.96600000   1.53840336
  0.96600000   2.69060533
  0.96600000   1.70479670
  0.96600000   2.88232219
  0.96600000   1.40577710
  0.96600000   2.49972357
  0.96600000   2.13772464
  0.96600000   2.85483444
  0.96600000   1.43351646
  0.96600000   2.54160681
  0.96600000   2.03814349
  0.96600000   2.95155442
  0.96600000   1.36030259
  0.96600000   2.42918882
  0.96600000   2.30426837
  0.96610000   2.05362870
  0.96610000   2.94082974
  0.96610000   1.36498300
  0.96610000   2.43769502
  0.96610000   2.28475923
  0.96610000   2.61509573
  0.96610000   1.86459317
  0.96610000   2.98383053
  0.96610000   1.35424974
  0.96610000   2.42077807
  0.96610000   2.32425453
  0.96610000   2.53470983
  0.96610000   2.05064240
  0.96610000   2.94303329
  0.96610000   1.36400051
  0.96610000   2.43613915
  0.96610000   2.28832020
  0.96610000   2.60799662
[truncated: 192,609 more chars]
