# Supplementary material for: Bifurcations of a New Fractional-Order System with a One-Scroll Chaotic Attractor
Source: Hindawi journal article supplement (doi:10.1155/2019/8341514), 2019-01-01
Supplement: f1 [file 8341514.f1.zip › 8341514.f1/q1-bifurcationdata/q1dataq098.dat]

  0.90000000   2.19528735
  0.90000000   2.35550172
  0.90000000   2.19626216
  0.90000000   2.35483952
  0.90000000   2.19710351
  0.90000000   2.35426463
  0.90000000   2.19783277
  0.90000000   2.35376373
  0.90000000   2.19846719
  0.90000000   2.35332591
  0.90000000   2.19902084
  0.90000000   2.35294217
  0.90000000   2.19950534
  0.90000000   2.35260503
  0.90000000   2.19993032
  0.90000000   2.35230820
  0.90000000   2.20030389
  0.90000000   2.35204638
  0.90000000   2.20063286
  0.90000000   2.35181504
  0.90000000   2.20092302
  0.90000000   2.35161034
  0.90000000   2.20117932
  0.90010000   2.19265434
  0.90010000   2.35798771
  0.90010000   2.19350452
  0.90010000   2.35741630
  0.90010000   2.19423293
  0.90010000   2.35692408
  0.90010000   2.19485941
  0.90010000   2.35649867
  0.90010000   2.19539996
  0.90010000   2.35612994
  0.90010000   2.19586769
  0.90010000   2.35580955
  0.90010000   2.19627338
  0.90010000   2.35553054
  0.90010000   2.19662601
  0.90010000   2.35528710
  0.90010000   2.19693306
  0.90010000   2.35507435
  0.90010000   2.19720086
  0.90010000   2.35488812
  0.90010000   2.19743475
  0.90010000   2.35472488
  0.90010000   2.19763927
  0.90020000   2.19000221
  0.90020000   2.36046298
  0.90020000   2.19073070
  0.90020000   2.35997798
  0.90020000   2.19135004
  0.90020000   2.35956357
  0.90020000   2.19187832
  0.90020000   2.35920840
  0.90020000   2.19233024
  0.90020000   2.35890321
  0.90020000   2.19271776
  0.90020000   2.35864038
  0.90020000   2.19305076
  0.90020000   2.35841357
  0.90020000   2.19333744
  0.90020000   2.35821750
  0.90020000   2.19358461
  0.90020000   2.35804774
  0.90020000   2.19379802
  0.90020000   2.35790054
  0.90020000   2.19398250
  0.90020000   2.35777273
  0.90020000   2.19414215
  0.90030000   2.18733457
  0.90030000   2.36292465
  0.90030000   2.18794509
  0.90030000   2.36252125
  0.90030000   2.18845992
  0.90030000   2.36217939
  0.90030000   2.18889531
  0.90030000   2.36188892
  0.90030000   2.18926440
  0.90030000   2.36164150
  0.90030000   2.18957795
  0.90030000   2.36143033
  0.90030000   2.18984478
  0.90030000   2.36124976
  0.90030000   2.19007221
  0.90030000   2.36109509
  0.90030000   2.19026632
  0.90030000   2.36096240
  0.90030000   2.19043217
  0.90030000   2.36084840
  0.90030000   2.19057404
  0.90030000   2.36075033
  0.90030000   2.19069549
  0.90040000   2.18465500
  0.90040000   2.36537000
  0.90040000   2.18515191
  0.90040000   2.36504304
  0.90040000   2.18556746
  0.90040000   2.36476825
  0.90040000   2.18591578
  0.90040000   2.36453673
  0.90040000   2.18620835
  0.90040000   2.36434123
  0.90040000   2.18645450
  0.90040000   2.36417583
  0.90040000   2.18666190
  0.90040000   2.36403563
  0.90040000   2.18683689
  0.90040000   2.36391659
  0.90040000   2.18698470
  0.90040000   2.36381535
  0.90040000   2.18710967
  0.90040000   2.36372911
  0.90040000   2.18721543
  0.90040000   2.36365554
  0.90040000   2.18730500
  0.90050000   2.18196695
  0.90050000   2.36779651
  0.90050000   2.18235525
  0.90050000   2.36754060
  0.90050000   2.18267727
  0.90050000   2.36732720
  0.90050000   2.18294480
  0.90050000   2.36714883
  0.90050000   2.18316742
  0.90050000   2.36699942
  0.90050000   2.18335293
  0.90050000   2.36687402
  0.90050000   2.18350771
  0.90050000   2.36676856
  0.90050000   2.18363697
  0.90050000   2.36667970
  0.90050000   2.18374504
  0.90050000   2.36660469
  0.90050000   2.18383547
  0.90050000   2.36654125
  0.90050000   2.18391121
  0.90050000   2.36648749
  0.90050000   2.18397468
  0.90060000   2.17927377
  0.90060000   2.37020189
  0.90060000   2.17955898
  0.90060000   2.37001145
  0.90060000   2.17979364
  0.90060000   2.36985370
  0.90060000   2.17998696
  0.90060000   2.36972271
  0.90060000   2.18014642
  0.90060000   2.36961370
  0.90060000   2.18027808
  0.90060000   2.36952276
  0.90060000   2.18038691
  0.90060000   2.36944674
  0.90060000   2.18047694
  0.90060000   2.36938303
  0.90060000   2.18055149
  0.90060000   2.36932951
  0.90060000   2.18061327
  0.90060000   2.36928443
  0.90060000   2.18066452
  0.90060000   2.36924636
  0.90060000   2.18070707
  0.90070000   2.17657871
  0.90070000   2.37258404
  0.90070000   2.17676677
  0.90070000   2.37245342
  0.90070000   2.17692057
  0.90070000   2.37234559
  0.90070000   2.17704644
  0.90070000   2.37225633
  0.90070000   2.17714953
  0.90070000   2.37218223
  0.90070000   2.17723404
  0.90070000   2.37212056
  0.90070000   2.17730337
  0.90070000   2.37206906
  0.90070000   2.17736030
  0.90070000   2.37202592
  0.90070000   2.17740709
  0.90070000   2.37198966
  0.90070000   2.17744558
  0.90070000   2.37195907
  0.90070000   2.17747728
  0.90070000   2.37193317
  0.90070000   2.17750342
  0.90080000   2.17388483
  0.90080000   2.37494110
  0.90080000   2.17398204
  0.90080000   2.37486462
  0.90080000   2.17406169
  0.90080000   2.37480108
  0.90080000   2.17412694
  0.90080000   2.37474810
  0.90080000   2.17418039
  0.90080000   2.37470376
  0.90080000   2.17422421
  0.90080000   2.37466650
  0.90080000   2.17426016
  0.90080000   2.37463506
  0.90080000   2.17428968
  0.90080000   2.37460842
  0.90080000   2.17431394
  0.90080000   2.37458572
  0.90080000   2.17433391
  0.90080000   2.37456630
  0.90080000   2.17435037
  0.90080000   2.37454959
  0.90080000   2.17436397
  0.90090000   2.17119506
  0.90090000   2.37727143
  0.90090000   2.17120799
  0.90090000   2.37724347
  0.90090000   2.17122031
  0.90090000   2.37721876
  0.90090000   2.17123171
  0.90090000   2.37719687
  0.90090000   2.17124207
  0.90090000   2.37717746
  0.90090000   2.17125135
  0.90090000   2.37716021
  0.90090000   2.17125960
  0.90090000   2.37714484
  0.90090000   2.17126689
  0.90090000   2.37713111
  0.90090000   2.17127329
  0.90090000   2.37711881
  0.90090000   2.17127890
  0.90090000   2.37710775
  0.90090000   2.17128381
  0.90090000   2.37709779
  0.90090000   2.17128810
  0.90100000   2.16851214
  0.90100000   2.37957360
  0.90100000   2.16844751
  0.90100000   2.37958867
  0.90100000   2.16839934
  0.90100000   2.37959753
  0.90100000   2.16836355
  0.90100000   2.37960188
  0.90100000   2.16833707
  0.90100000   2.37960297
  0.90100000   2.16831758
  0.90100000   2.37960175
  0.90100000   2.16830334
  0.90100000   2.37959893
  0.90100000   2.16829303
  0.90100000   2.37959504
  0.90100000   2.16828566
  0.90100000   2.37959046
  0.90100000   2.16828048
  0.90100000   2.37958547
  0.90100000   2.16827692
  0.90100000   2.37958027
  0.90100000   2.16827455
  0.90110000   2.16583863
  0.90110000   2.38184640
  0.90110000   2.16570327
  0.90110000   2.38189917
  0.90110000   2.16560138
  0.90110000   2.38193665
  0.90110000   2.16552482
  0.90110000   2.38196272
  0.90110000   2.16546741
  0.90110000   2.38198030
  0.90110000   2.16542446
  0.90110000   2.38199160
  0.90110000   2.16539242
  0.90110000   2.38199829
  0.90110000   2.16536861
  0.90110000   2.38200162
  0.90110000   2.16535098
  0.90110000   2.38200254
  0.90110000   2.16533799
  0.90110000   2.38200175
  0.90110000   2.16532850
  0.90110000   2.38199976
  0.90110000   2.16532161
  0.90120000   2.16317690
  0.90120000   2.38408882
  0.90120000   2.16297764
  0.90120000   2.38417420
  0.90120000   2.16282864
  0.90120000   2.38423565
  0.90120000   2.16271744
  0.90120000   2.38427932
  0.90120000   2.16263461
  0.90120000   2.38430979
  0.90120000   2.16257303
  0.90120000   2.38433053
  0.90120000   2.16252736
  0.90120000   2.38434413
  0.90120000   2.16249357
  0.90120000   2.38435253
  0.90120000   2.16246865
  0.90120000   2.38435715
  0.90120000   2.16245034
  0.90120000   2.38435907
  0.90120000   2.16243694
  0.90120000   2.38435908
  0.90120000   2.16242719
  0.90130000   2.16052911
  0.90130000   2.38630008
  0.90130000   2.16027273
  0.90130000   2.38641322
  0.90130000   2.16008302
  0.90130000   2.38649434
  0.90130000   2.15994296
  0.90130000   2.38655186
  0.90130000   2.15983977
  0.90130000   2.38659206
  0.90130000   2.15976389
  0.90130000   2.38661960
  0.90130000   2.15970822
  0.90130000   2.38663794
  0.90130000   2.15966747
  0.90130000   2.38664963
  0.90130000   2.15963771
  0.90130000   2.38665653
  0.90130000   2.15961606
  0.90130000   2.38666002
  0.90130000   2.15960036
  0.90130000   2.38666111
  0.90130000   2.15958903
  0.90140000   2.15789725
  0.90140000   2.38847956
  0.90140000   2.15759038
  0.90140000   2.38861591
  0.90140000   2.15736608
  0.90140000   2.38871274
  0.90140000   2.15720255
  0.90140000   2.38878079
  0.90140000   2.15708359
  0.90140000   2.38882797
  0.90140000   2.15699724
  0.90140000   2.38886008
  0.90140000   2.15693469
  0.90140000   2.38888136
  0.90140000   2.15688948
  0.90140000   2.38889492
  0.90140000   2.15685689
  0.90140000   2.38890298
  0.90140000   2.15683347
  0.90140000   2.38890718
  0.90140000   2.15681670
  0.90140000   2.38890869
  0.90140000   2.15680474
  0.90150000   2.15528309
  0.90150000   2.39062682
  0.90150000   2.15493217
  0.90150000   2.39078216
  0.90150000   2.15467907
  0.90150000   2.39089113
  0.90150000   2.15449703
  0.90150000   2.39096676
  0.90150000   2.15436642
  0.90150000   2.39101855
  0.90150000   2.15427293
  0.90150000   2.39105336
  0.90150000   2.15420614
  0.90150000   2.39107615
  0.90150000   2.15415854
  0.90150000   2.39109046
  0.90150000   2.15412470
  0.90150000   2.39109885
  0.90150000   2.15410071
  0.90150000   2.39110313
  0.90150000   2.15408378
  0.90150000   2.39110458
  0.90150000   2.15407187
  0.90160000   2.15268820
  0.90160000   2.39274161
  0.90160000   2.15229946
  0.90160000   2.39291204
  0.90160000   2.15202297
  0.90160000   2.39302993
  0.90160000   2.15182694
  0.90160000   2.39311058
  0.90160000   2.15168832
  0.90160000   2.39316499
  0.90160000   2.15159053
  0.90160000   2.39320099
  0.90160000   2.15152169
  0.90160000   2.39322413
  0.90160000   2.15147335
  0.90160000   2.39323837
  0.90160000   2.15143949
  0.90160000   2.39324647
  0.90160000   2.15141584
  0.90160000   2.39325037
  0.90160000   2.15139938
  0.90160000   2.39325145
  0.90160000   2.15138798
  0.90170000   2.15011398
  0.90170000   2.39482382
  0.90170000   2.14969333
  0.90170000   2.39500576
  0.90170000   2.14939848
  0.90170000   2.39512973
  0.90170000   2.14919253
  0.90170000   2.39521321
  0.90170000   2.14904907
  0.90170000   2.39526859
  0.90170000   2.14894938
  0.90170000   2.39530455
  0.90170000   2.14888028
  0.90170000   2.39532718
  0.90170000   2.14883249
  0.90170000   2.39534072
  0.90170000   2.14879952
  0.90170000   2.39534809
  0.90170000   2.14877685
  0.90170000   2.39535133
  0.90170000   2.14876132
  0.90170000   2.39535184
  0.90170000   2.14875073
  0.90180000   2.14756163
  0.90180000   2.39687347
  0.90180000   2.14711467
  0.90180000   2.39706371
  0.90180000   2.14680608
  0.90180000   2.39719126
  0.90180000   2.14659381
  0.90180000   2.39727571
  0.90180000   2.14644824
  0.90180000   2.39733071
  0.90180000   2.14634865
  0.90180000   2.39736569
  0.90180000   2.14628069
  0.90180000   2.39738715
  0.90180000   2.14623442
  0.90180000   2.39739955
  0.90180000   2.14620301
  0.90180000   2.39740592
  0.90180000   2.14618175
  0.90180000   2.39740832
  0.90180000   2.14616742
  0.90180000   2.39740815
  0.90180000   2.14615780
  0.90190000   2.14503216
  0.90190000   2.39889072
  0.90190000   2.14456415
  0.90190000   2.39908637
  0.90190000   2.14424601
  0.90190000   2.39921535
  0.90190000   2.14403061
  0.90190000   2.39929922
  0.90190000   2.14388521
  0.90190000   2.39935277
  0.90190000   2.14378733
  0.90190000   2.39938606
  0.90190000   2.14372160
  0.90190000   2.39940589
  0.90190000   2.14367757
  0.90190000   2.39941687
  0.90190000   2.14364816
  0.90190000   2.39942206
  0.90190000   2.14362858
  0.90190000   2.39942353
  0.90190000   2.14361559
  0.90190000   2.39942265
  0.90190000   2.14360703
  0.90200000   2.14252643
  0.90200000   2.40087583
  0.90200000   2.14204225
  0.90200000   2.40107434
  0.90200000   2.14171834
  0.90200000   2.40120291
  0.90200000   2.14150254
  0.90200000   2.40128495
  0.90200000   2.14135924
  0.90200000   2.40133622
  0.90200000   2.14126434
  0.90200000   2.40136729
  0.90200000   2.14120164
  0.90200000   2.40138520
  0.90200000   2.14116033
  0.90200000   2.40139458
  0.90200000   2.14113319
  0.90200000   2.40139852
  0.90200000   2.14111543
  0.90200000   2.40139903
  0.90200000   2.14110384
  0.90200000   2.40139744
  0.90200000   2.14109633
  0.90210000   2.14004513
  0.90210000   2.40282917
  0.90210000   2.13954928
  0.90210000   2.40302830
  0.90210000   2.13922295
  0.90210000   2.40315493
  0.90210000   2.13900910
  0.90210000   2.40323412
  0.90210000   2.13886944
  0.90210000   2.40328250
  0.90210000   2.13877848
  0.90210000   2.40331101
  0.90210000   2.13871939
  0.90210000   2.40332680
  0.90210000   2.13868111
  0.90210000   2.40333452
  0.90210000   2.13865638
  0.90210000   2.40333720
  0.90210000   2.13864047
  0.90210000   2.40333677
  0.90210000   2.13863027
  0.90210000   2.40333450
  0.90210000   2.13862377
  0.90220000   2.13758879
  0.90220000   2.40475119
  0.90220000   2.13708538
  0.90220000   2.40494901
  0.90220000   2.13675957
  0.90220000   2.40507242
  0.90220000   2.13654965
  0.90220000   2.40514800
  0.90220000   2.13641486
  0.90220000   2.40519305
  0.90220000   2.13632855
  0.90220000   2.40521878
  0.90220000   2.13627343
  0.90220000   2.40523238
  0.90220000   2.13623833
  0.90220000   2.40523843
  0.90220000   2.13621604
  0.90220000   2.40523988
  0.90220000   2.13620194
  0.90220000   2.40523857
  0.90220000   2.13619306
  0.90220000   2.40523568
  0.90220000   2.13618751
  0.90230000   2.13515781
  0.90230000   2.40664241
  0.90230000   2.13465056
  0.90230000   2.40683727
  0.90230000   2.13432783
  0.90230000   2.40695644
  0.90230000   2.13412344
  0.90230000   2.40702783
  0.90230000   2.13399446
  0.90230000   2.40706928
  0.90230000   2.13391328
  0.90230000   2.40709213
  0.90230000   2.13386234
  0.90230000   2.40710353
  0.90230000   2.13383045
  0.90230000   2.40710797
  0.90230000   2.13381055
  0.90230000   2.40710825
  0.90230000   2.13379819
  0.90230000   2.40710613
  0.90230000   2.13379054
  0.90230000   2.40710267
  0.90230000   2.13378584
  0.90240000   2.13275246
  0.90240000   2.40850342
  0.90240000   2.13224470
  0.90240000   2.40869393
  0.90240000   2.13192723
  0.90240000   2.40880807
  0.90240000   2.13172968
  0.90240000   2.40887487
  0.90240000   2.13160718
  0.90240000   2.40891256
  0.90240000   2.13153143
  0.90240000   2.40893251
  0.90240000   2.13148472
  0.90240000   2.40894177
  0.90240000   2.13145600
  0.90240000   2.40894468
  0.90240000   2.13143839
  0.90240000   2.40894389
  0.90240000   2.13142764
  0.90240000   2.40894103
  0.90240000   2.13142111
  0.90240000   2.40893709
  0.90240000   2.13141716
  0.90250000   2.13037288
  0.90250000   2.41033485
  0.90250000   2.12986757
  0.90250000   2.41051988
  0.90250000   2.12955720
  0.90250000   2.41062839
  0.90250000   2.12936748
  0.90250000   2.41069034
  0.90250000   2.12925192
  0.90250000   2.41072422
  0.90250000   2.12918174
  0.90250000   2.41074133
  0.90250000   2.12913923
  0.90250000   2.41074855
  0.90250000   2.12911355
  0.90250000   2.41075003
  0.90250000   2.12909809
  0.90250000   2.41074827
  0.90250000   2.12908882
  0.90250000   2.41074476
  0.90250000   2.12908328
  0.90250000   2.41074040
  0.90250000   2.12907999
  0.90260000   2.12801912
  0.90260000   2.41213739
  0.90260000   2.12751884
  0.90260000   2.41231601
  0.90260000   2.12721708
  0.90260000   2.41241846
  0.90260000   2.12703595
  0.90260000   2.41247544
  0.90260000   2.12692761
  0.90260000   2.41250555
  0.90260000   2.12686299
  0.90260000   2.41251992
  0.90260000   2.12682456
  0.90260000   2.41252522
  0.90260000   2.12680176
  0.90260000   2.41252540
  0.90260000   2.12678828
  0.90260000   2.41252277
  0.90260000   2.12678033
  0.90260000   2.41251870
  0.90260000   2.12677567
  0.90260000   2.41251398
  0.90260000   2.12677295
  0.90270000   2.12569112
  0.90270000   2.41391173
  0.90270000   2.12519810
  0.90270000   2.41408323
  0.90270000   2.12490616
  0.90270000   2.41417935
  0.90270000   2.12473414
  0.90270000   2.41423134
  0.90270000   2.12463313
  0.90270000   2.41425777
  0.90270000   2.12457399
  0.90270000   2.41426954
  0.90270000   2.12453945
  0.90270000   2.41427307
  0.90270000   2.12451933
  0.90270000   2.41427207
  0.90270000   2.12450765
  0.90270000   2.41426868
  0.90270000   2.12450088
  0.90270000   2.41426413
  0.90270000   2.12449698
  0.90270000   2.41425911
  0.90270000   2.12449473
  0.90280000   2.12338873
  0.90280000   2.41565861
  0.90280000   2.12290488
  0.90280000   2.41582246
  0.90280000   2.12262370
  0.90280000   2.41591210
  0.90280000   2.12246111
  0.90280000   2.41595916
  0.90280000   2.12236741
  0.90280000   2.41598205
  0.90280000   2.12231357
  0.90280000   2.41599140
  0.90280000   2.12228270
  0.90280000   2.41599331
  0.90280000   2.12226505
  0.90280000   2.41599126
  0.90280000   2.12225498
  0.90280000   2.41598721
  0.90280000   2.12224925
  0.90280000   2.41598225
  0.90280000   2.12224600
  0.90280000   2.41597698
  0.90280000   2.12224414
  0.90290000   2.12111174
  0.90290000   2.41737877
  0.90290000   2.12063865
  0.90290000   2.41753461
  0.90290000   2.12036893
  0.90290000   2.41761773
  0.90290000   2.12021592
  0.90290000   2.41765998
  0.90290000   2.12012940
  0.90290000   2.41767951
  0.90290000   2.12008062
  0.90290000   2.41768662
  0.90290000   2.12005317
  0.90290000   2.41768708
  0.90290000   2.12003777
  0.90290000   2.41768410
  0.90290000   2.12002914
  0.90290000   2.41767948
  0.90290000   2.12002430
  0.90290000   2.41767418
  0.90290000   2.12002159
  0.90290000   2.41766872
  0.90290000   2.12002006
  0.90300000   2.11885985
  0.90300000   2.41907297
  0.90300000   2.11839882
  0.90300000   2.41922056
  0.90300000   2.11814104
  0.90300000   2.41929722
  0.90300000   2.11799761
  0.90300000   2.41933483
  0.90300000   2.11791807
  0.90300000   2.41935123
  0.90300000   2.11787407
  0.90300000   2.41935628
  0.90300000   2.11784978
  0.90300000   2.41935543
  0.90300000   2.11783640
  0.90300000   2.41935165
  0.90300000   2.11782903
  0.90300000   2.41934654
  0.90300000   2.11782496
  0.90300000   2.41934096
  0.90300000   2.11782271
  0.90300000   2.41933535
  0.90300000   2.11782143
  0.90310000   2.11663274
  0.90310000   2.42074195
  0.90310000   2.11618478
  0.90310000   2.42088120
  0.90310000   2.11593923
  0.90310000   2.42095153
  0.90310000   2.11580528
  0.90310000   2.42098472
  0.90310000   2.11573243
  0.90310000   2.42099819
  0.90310000   2.11569291
  0.90310000   2.42100138
  0.90310000   2.11567151
  0.90310000   2.42099937
  0.90310000   2.11565992
  0.90310000   2.42099489
  0.90310000   2.11565365
  0.90310000   2.42098938
  0.90310000   2.11565024
  0.90310000   2.42098358
  0.90310000   2.11564836
  0.90310000   2.42097785
  0.90310000   2.11564729
  0.90320000   2.11442999
  0.90320000   2.42238648
  0.90320000   2.11399590
  0.90320000   2.42251738
  0.90320000   2.11376270
  0.90320000   2.42258157
  0.90320000   2.11363800
  0.90320000   2.42261059
  0.90320000   2.11357153
  0.90320000   2.42262136
  0.90320000   2.11353616
  0.90320000   2.42262287
  0.90320000   2.11351737
  0.90320000   2.42261985
  0.90320000   2.11350738
  0.90320000   2.42261478
  0.90320000   2.11350206
  0.90320000   2.42260893
  0.90320000   2.11349919
  0.90320000   2.42260294
  0.90320000   2.11349762
  0.90320000   2.42259713
  0.90320000   2.11349671
  0.90330000   2.11225120
  0.90330000   2.42400731
  0.90330000   2.11183152
  0.90330000   2.42412994
  0.90330000   2.11161063
  0.90330000   2.42418823
  0.90330000   2.11149490
  0.90330000   2.42421334
  0.90330000   2.11143443
  0.90330000   2.42422164
  0.90330000   2.11140290
  0.90330000   2.42422164
  0.90330000   2.11138646
  0.90330000   2.42421774
  0.90330000   2.11137787
  0.90330000   2.42421217
  0.90330000   2.11137336
  0.90330000   2.42420605
  0.90330000   2.11137095
  0.90330000   2.42419992
  0.90330000   2.11136962
  0.90330000   2.42419404
  0.90330000   2.11136883
  0.90340000   2.11009589
  0.90340000   2.42560516
  0.90340000   2.10969097
  0.90340000   2.42571970
  0.90340000   2.10948224
  0.90340000   2.42577235
  0.90340000   2.10937512
  0.90340000   2.42579382
  0.90340000   2.10932029
  0.90340000   2.42579988
  0.90340000   2.10929225
  0.90340000   2.42579855
  0.90340000   2.10927791
  0.90340000   2.42579388
  0.90340000   2.10927054
  0.90340000   2.42578789
  0.90340000   2.10926672
  0.90340000   2.42578154
  0.90340000   2.10926468
  0.90340000   2.42577531
  0.90340000   2.10926355
  0.90340000   2.42576938
  0.90340000   2.10926286
  0.90350000   2.10796356
  0.90350000   2.42718076
  0.90350000   2.10757357
  0.90350000   2.42728743
  0.90350000   2.10737675
  0.90350000   2.42733474
  0.90350000   2.10727784
  0.90350000   2.42735284
  0.90350000   2.10722825
  0.90350000   2.42735688
  0.90350000   2.10720339
  0.90350000   2.42735438
  0.90350000   2.10719091
  0.90350000   2.42734905
  0.90350000   2.10718460
  0.90350000   2.42734271
  0.90350000   2.10718136
  0.90350000   2.42733618
  0.90350000   2.10717963
  0.90350000   2.42732987
  0.90350000   2.10717864
  0.90350000   2.42732392
  0.90350000   2.10717802
  0.90360000   2.10585373
  0.90360000   2.42873481
  0.90360000   2.10547865
  0.90360000   2.42883389
  0.90360000   2.10529340
  0.90360000   2.42887618
  0.90360000   2.10520227
  0.90360000   2.42889118
  0.90360000   2.10515752
  0.90360000   2.42889340
  0.90360000   2.10513554
  0.90360000   2.42888987
  0.90360000   2.10512470
  0.90360000   2.42888399
  0.90360000   2.10511930
  0.90360000   2.42887735
  0.90360000   2.10511654
  0.90360000   2.42887069
  0.90360000   2.10511506
  0.90360000   2.42886432
  0.90360000   2.10511418
  0.90360000   2.42885835
  0.90360000   2.10511360
  0.90370000   2.10376585
  0.90370000   2.43026800
  0.90370000   2.10340555
  0.90370000   2.43035981
  0.90370000   2.10323145
  0.90370000   2.43039739
  0.90370000   2.10314764
  0.90370000   2.43040956
  0.90370000   2.10310735
  0.90370000   2.43041015
  0.90370000   2.10308795
  0.90370000   2.43040573
  0.90370000   2.10307855
  0.90370000   2.43039938
  0.90370000   2.10307393
  0.90370000   2.43039251
  0.90370000   2.10307157
  0.90370000   2.43038575
  0.90370000   2.10307028
  0.90370000   2.43037934
  0.90370000   2.10306949
  0.90370000   2.43037337
  0.90370000   2.10306894
  0.90380000   2.10169942
  0.90380000   2.43178099
  0.90380000   2.10135360
  0.90380000   2.43186588
  0.90380000   2.10119019
  0.90380000   2.43189908
  0.90380000   2.10111325
  0.90380000   2.43190867
  0.90380000   2.10107703
  0.90380000   2.43190782
  0.90380000   2.10105993
  0.90380000   2.43190263
  0.90380000   2.10105179
  0.90380000   2.43189589
  0.90380000   2.10104782
  0.90380000   2.43188883
  0.90380000   2.10104579
  0.90380000   2.43188199
  0.90380000   2.10104465
  0.90380000   2.43187555
  0.90380000   2.10104393
  0.90380000   2.43186959
  0.90380000   2.10104339
  0.90390000   2.09965388
  0.90390000   2.43327444
  0.90390000   2.09932216
  0.90390000   2.43335277
  0.90390000   2.09916894
  0.90390000   2.43338191
  0.90390000   2.09909838
  0.90390000   2.43338917
  0.90390000   2.09906587
  0.90390000   2.43338705
  0.90390000   2.09905083
  0.90390000   2.43338120
  0.90390000   2.09904377
  0.90390000   2.43337412
  0.90390000   2.09904035
  0.90390000   2.43336692
  0.90390000   2.09903859
  0.90390000   2.43336002
  0.90390000   2.09903757
  0.90390000   2.43335357
  0.90390000   2.09903689
  0.90390000   2.43334762
  0.90390000   2.09903636
  0.90400000   2.09762871
  0.90400000   2.43474896
  0.90400000   2.09731060
  0.90400000   2.43482111
  0.90400000   2.09716702
  0.90400000   2.43484651
  0.90400000   2.09710238
  0.90400000   2.43485167
  0.90400000   2.09707324
  0.90400000   2.43484843
  0.90400000   2.09706001
  0.90400000   2.43484201
  0.90400000   2.09705388
  0.90400000   2.43483467
  0.90400000   2.09705093
  0.90400000   2.43482735
  0.90400000   2.09704938
  0.90400000   2.43482041
  0.90400000   2.09704846
  0.90400000   2.43481397
  0.90400000   2.09704780
  0.90400000   2.43480803
  0.90400000   2.09704726
  0.90410000   2.09562340
  0.90410000   2.43620516
  0.90410000   2.09531830
  0.90410000   2.43627151
  0.90410000   2.09518381
  0.90410000   2.43629348
  0.90410000   2.09512463
  0.90410000   2.43629676
  0.90410000   2.09509852
  0.90410000   2.43629254
  0.90410000   2.09508689
  0.90410000   2.43628565
  0.90410000   2.09508157
  0.90410000   2.43627809
  0.90410000   2.09507900
  0.90410000   2.43627068
  0.90410000   2.09507762
  0.90410000   2.43626372
  0.90410000   2.09507676
  0.90410000   2.43625728
  0.90410000   2.09507611
  0.90410000   2.43625136
  0.90410000   2.09507557
  0.90420000   2.09363741
  0.90420000   2.43764360
  0.90420000   2.09334467
  0.90420000   2.43770457
  0.90420000   2.09321868
  0.90420000   2.43772339
  0.90420000   2.09316452
  0.90420000   2.43772499
  0.90420000   2.09314114
  0.90420000   2.43771993
  0.90420000   2.09313091
  0.90420000   2.43771262
  0.90420000   2.09312628
  0.90420000   2.43770489
  0.90420000   2.09312402
  0.90420000   2.43769742
  0.90420000   2.09312278
  0.90420000   2.43769045
  0.90420000   2.09312196
  0.90420000   2.43768402
  0.90420000   2.09312132
  0.90420000   2.43767813
  0.90420000   2.09312076
  0.90430000   2.09167026
  0.90430000   2.43906484
  0.90430000   2.09138914
  0.90430000   2.43912081
  0.90430000   2.09127107
  0.90430000   2.43913679
  0.90430000   2.09122150
  0.90430000   2.43913689
  0.90430000   2.09120056
  0.90430000   2.43913109
  0.90430000   2.09119155
  0.90430000   2.43912345
  0.90430000   2.09118750
  0.90430000   2.43911558
  0.90430000   2.09118551
  0.90430000   2.43910806
  0.90430000   2.09118436
  0.90430000   2.43910109
  0.90430000   2.09118357
  0.90430000   2.43909469
  0.90430000   2.09118293
  0.90430000   2.43908881
  0.90430000   2.09118235
  0.90440000   2.08972144
  0.90440000   2.44046942
  0.90440000   2.08945115
  0.90440000   2.44052078
  0.90440000   2.08934042
  0.90440000   2.44053418
  0.90440000   2.08929503
  0.90440000   2.44053295
  0.90440000   2.08927626
  0.90440000   2.44052653
  0.90440000   2.08926831
  0.90440000   2.44051861
  0.90440000   2.08926475
  0.90440000   2.44051063
  0.90440000   2.08926297
  0.90440000   2.44050308
  0.90440000   2.08926190
  0.90440000   2.44049612
  0.90440000   2.08926113
  0.90440000   2.44048973
  0.90440000   2.08926047
  0.90440000   2.44048389
  0.90440000   2.08925988
  0.90450000   2.08779050
  0.90450000   2.44185783
  0.90450000   2.08753017
  0.90450000   2.44190498
  0.90450000   2.08742619
  0.90450000   2.44191605
  0.90450000   2.08738459
  0.90450000   2.44191366
  0.90450000   2.08736775
  0.90450000   2.44190669
  0.90450000   2.08736072
  0.90450000   2.44189855
  0.90450000   2.08735757
  0.90450000   2.44189048
  0.90450000   2.08735596
  0.90450000   2.44188293
  0.90450000   2.08735494
  0.90450000   2.44187597
  0.90450000   2.08735417
  0.90450000   2.44186961
  0.90450000   2.08735351
  0.90450000   2.44186379
  0.90450000   2.08735289
  0.90460000   2.08587700
  0.90460000   2.44323057
  0.90460000   2.08562569
  0.90460000   2.44327388
  0.90460000   2.08552788
  0.90460000   2.44328286
  0.90460000   2.08548970
  0.90460000   2.44327945
  0.90460000   2.08547457
  0.90460000   2.44327202
  0.90460000   2.08546833
  0.90460000   2.44326369
  0.90460000   2.08546552
  0.90460000   2.44325558
  0.90460000   2.08546404
  0.90460000   2.44324801
  0.90460000   2.08546307
  0.90460000   2.44324108
  0.90460000   2.08546230
  0.90460000   2.44323474
  0.90460000   2.08546162
  0.90460000   2.44322895
  0.90460000   2.08546098
  0.90470000   2.08398052
  0.90470000   2.44458808
  0.90470000   2.08373723
  0.90470000   2.44462793
  0.90470000   2.08364502
  0.90470000   2.44463506
  0.90470000   2.08360990
  0.90470000   2.44463076
  0.90470000   2.08359627
  0.90470000   2.44462294
  0.90470000   2.08359072
  0.90470000   2.44461447
  0.90470000   2.08358819
  0.90470000   2.44460631
  0.90470000   2.08358681
  0.90470000   2.44459875
  0.90470000   2.08358586
  0.90470000   2.44459183
  0.90470000   2.08358509
  0.90470000   2.44458553
  0.90470000   2.08358439
  0.90470000   2.44457976
  0.90470000   2.08358372
  0.90480000   2.08210068
  0.90480000   2.44593080
  0.90480000   2.08186434
  0.90480000   2.44596758
  0.90480000   2.08177715
  0.90480000   2.44597305
  0.90480000   2.08174476
  0.90480000   2.44596798
  0.90480000   2.08173245
  0.90480000   2.44595984
  0.90480000   2.08172747
  0.90480000   2.44595125
  0.90480000   2.08172518
  0.90480000   2.44594307
  0.90480000   2.08172388
  0.90480000   2.44593552
  0.90480000   2.08172294
  0.90480000   2.44592863
  0.90480000   2.08172216
  0.90480000   2.44592235
  0.90480000   2.08172144
  0.90480000   2.44591661
  0.90480000   2.08172075
  0.90490000   2.08023714
  0.90490000   2.44725915
  0.90490000   2.08000658
  0.90490000   2.44729322
  0.90490000   2.07992383
  0.90490000   2.44729725
  0.90490000   2.07989387
  0.90490000   2.44729152
  0.90490000   2.07988270
  0.90490000   2.44728311
  0.90490000   2.07987822
  0.90490000   2.44727443
  0.90490000   2.07987612
  0.90490000   2.44726623
  0.90490000   2.07987487
  0.90490000   2.44725871
  0.90490000   2.07987394
  0.90490000   2.44725184
  0.90490000   2.07987314
  0.90490000   2.44724559
  0.90490000   2.07987239
  0.90490000   2.44723988
  0.90490000   2.07987169
  0.90500000   2.07838963
  0.90500000   2.44857352
  0.90500000   2.07816354
  0.90500000   2.44860525
  0.90500000   2.07808465
  0.90500000   2.44860802
  0.90500000   2.07805682
  0.90500000   2.44860172
  0.90500000   2.07804665
  0.90500000   2.44859310
  0.90500000   2.07804258
  0.90500000   2.44858435
  0.90500000   2.07804063
  0.90500000   2.44857615
  0.90500000   2.07803943
  0.90500000   2.44856865
  0.90500000   2.07803850
  0.90500000   2.44856181
  0.90500000   2.07803768
  0.90500000   2.44855559
  0.90500000   2.07803691
  0.90500000   2.44854990
  0.90500000   2.07803618
  0.90510000   2.07655792
  0.90510000   2.44987427
  0.90510000   2.07633485
  0.90510000   2.44990403
  0.90510000   2.07625924
  0.90510000   2.44990572
  0.90510000   2.07623326
  0.90510000   2.44989895
  0.90510000   2.07622394
  0.90510000   2.44989015
  0.90510000   2.07622022
  0.90510000   2.44988136
  0.90510000   2.07621839
  0.90510000   2.44987317
  0.90510000   2.07621721
  0.90510000   2.44986569
  0.90510000   2.07621627
  0.90510000   2.44985889
  0.90510000   2.07621543
  0.90510000   2.44985269
  0.90510000   2.07621465
  0.90510000   2.44984703
  0.90510000   2.07621390
  0.90520000   2.07474186
  0.90520000   2.45116173
  0.90520000   2.07452017
  0.90520000   2.45118992
  0.90520000   2.07444722
  0.90520000   2.45119071
  0.90520000   2.07442281
  0.90520000   2.45118353
  0.90520000   2.07441422
  0.90520000   2.45117460
  0.90520000   2.07441079
  0.90520000   2.45116579
  0.90520000   2.07440906
  0.90520000   2.45115761
  0.90520000   2.07440790
  0.90520000   2.45115016
  0.90520000   2.07440695
  0.90520000   2.45114339
  0.90520000   2.07440609
  0.90520000   2.45113722
  0.90520000   2.07440528
  0.90520000   2.45113159
  0.90520000   2.07440451
  0.90530000   2.07294143
  0.90530000   2.45243622
  0.90530000   2.07271919
  0.90530000   2.45246324
  0.90530000   2.07264824
  0.90530000   2.45246329
  0.90530000   2.07262516
  0.90530000   2.45245580
  0.90530000   2.07261718
  0.90530000   2.45244676
  0.90530000   2.07261399
  0.90530000   2.45243793
  0.90530000   2.07261233
  0.90530000   2.45242978
  0.90530000   2.07261117
  0.90530000   2.45242236
  0.90530000   2.07261021
  0.90530000   2.45241562
  0.90530000   2.07260932
  0.90530000   2.45240949
  0.90530000   2.07260849
  0.90530000   2.45240388
  0.90530000   2.07260771
  0.90540000   2.07115676
  0.90540000   2.45369801
  0.90540000   2.07093164
  0.90540000   2.45372430
  0.90540000   2.07086200
  0.90540000   2.45372379
  0.90540000   2.07083997
  0.90540000   2.45371605
  0.90540000   2.07083250
  0.90540000   2.45370693
  0.90540000   2.07082949
  0.90540000   2.45369811
  0.90540000   2.07082788
  0.90540000   2.45368999
  0.90540000   2.07082673
  0.90540000   2.45368260
  0.90540000   2.07082575
  0.90540000   2.45367589
  0.90540000   2.07082485
  0.90540000   2.45366979
  0.90540000   2.07082400
  0.90540000   2.45366421
  0.90540000   2.07082318
  0.90550000   2.06938819
  0.90550000   2.45494733
  0.90550000   2.06915732
  0.90550000   2.45497341
  0.90550000   2.06908819
  0.90550000   2.45497249
  0.90550000   2.06906695
  0.90550000   2.45496457
  0.90550000   2.06905987
  0.90550000   2.45495541
  0.90550000   2.06905702
  0.90550000   2.45494660
  0.90550000   2.06905545
  0.90550000   2.45493851
  0.90550000   2.06905429
  0.90550000   2.45493116
  0.90550000   2.06905329
  0.90550000   2.45492448
  0.90550000   2.06905237
  0.90550000   2.45491841
  0.90550000   2.06905150
  0.90550000   2.45491285
  0.90550000   2.06905067
  0.90560000   2.06763639
  0.90560000   2.45618438
  0.90560000   2.06739611
  0.90560000   2.45621082
  0.90560000   2.06732654
  0.90560000   2.45620969
  0.90560000   2.06730580
  0.90560000   2.45620165
  0.90560000   2.06729903
  0.90560000   2.45619247
  0.90560000   2.06729629
  0.90560000   2.45618368
  0.90560000   2.06729475
  0.90560000   2.45617563
  0.90560000   2.06729358
  0.90560000   2.45616831
  0.90560000   2.06729256
  0.90560000   2.45616167
  0.90560000   2.06729161
  0.90560000   2.45615563
  0.90560000   2.06729072
  0.90560000   2.45615010
  0.90560000   2.06728987
  0.90570000   2.06590254
  0.90570000   2.45740925
  0.90570000   2.06564799
  0.90570000   2.45743677
  0.90570000   2.06557681
  0.90570000   2.45743563
  0.90570000   2.06555626
  0.90570000   2.45742754
  0.90570000   2.06554970
  0.90570000   2.45741837
  0.90570000   2.06554704
  0.90570000   2.45740962
  0.90570000   2.06554550
  0.90570000   2.45740160
  0.90570000   2.06554432
  0.90570000   2.45739433
  0.90570000   2.06554328
  0.90570000   2.45738772
  0.90570000   2.06554231
  0.90570000   2.45738171
  0.90570000   2.06554140
  0.90570000   2.45737621
  0.90570000   2.06554053
  0.90580000   2.06418861
  0.90580000   2.45862194
  0.90580000   2.06391310
  0.90580000   2.45865149
  0.90580000   2.06383881
  0.90580000   2.45865057
  0.90580000   2.06381808
  0.90580000   2.45864251
  0.90580000   2.06381162
  0.90580000   2.45863337
  0.90580000   2.06380900
  0.90580000   2.45862466
  0.90580000   2.06380747
  0.90580000   2.45861669
  0.90580000   2.06380627
  0.90580000   2.45860946
  0.90580000   2.06380521
  0.90580000   2.45860289
  0.90580000   2.06380422
  0.90580000   2.45859690
  0.90580000   2.06380328
  0.90580000   2.45859143
  0.90580000   2.06380240
  0.90590000   2.06249798
  0.90590000   2.45982230
  0.90590000   2.06219188
  0.90590000   2.45985513
  0.90590000   2.06211241
  0.90590000   2.45985475
  0.90590000   2.06209102
  0.90590000   2.45984679
  0.90590000   2.06208453
  0.90590000   2.45983771
  0.90590000   2.06208193
  0.90590000   2.45982905
  0.90590000   2.06208039
  0.90590000   2.45982113
  0.90590000   2.06207917
  0.90590000   2.45981394
  0.90590000   2.06207809
  0.90590000   2.45980741
  0.90590000   2.06207708
  0.90590000   2.45980146
  0.90590000   2.06207613
  0.90590000   2.45979601
  0.90590000   2.06207523
  0.90600000   2.06083643
  0.90600000   2.46100986
  0.90600000   2.06048521
  0.90600000   2.46104781
  0.90600000   2.06039756
  0.90600000   2.46104836
  0.90600000   2.06037487
  0.90600000   2.46104061
  0.90600000   2.06036822
  0.90600000   2.46103162
  0.90600000   2.06036560
  0.90600000   2.46102303
  0.90600000   2.06036404
  0.90600000   2.46101517
  0.90600000   2.06036280
  0.90600000   2.46100802
  0.90600000   2.06036169
  0.90600000   2.46100153
  0.90600000   2.06036066
  0.90600000   2.46099561
  0.90600000   2.06035969
  0.90600000   2.46099019
  0.90600000   2.06035877
  0.90610000   2.05921434
  0.90610000   2.46218361
  0.90610000   2.05879486
  0.90610000   2.46222950
  0.90610000   2.05869440
  0.90610000   2.46223158
  0.90610000   2.05866948
  0.90610000   2.46222418
  0.90610000   2.05866247
  0.90610000   2.46221532
  0.90610000   2.05865977
  0.90610000   2.46220682
  0.90610000   2.05865818
  0.90610000   2.46219901
  0.90610000   2.05865691
  0.90610000   2.46219192
  0.90610000   2.05865578
  0.90610000   2.46218547
  0.90610000   2.05865473
  0.90610000   2.46217958
  0.90610000   2.05865374
  0.90610000   2.46217420
  0.90610000   2.05865281
  0.90620000   2.05765141
  0.90620000   2.46334151
  0.90620000   2.05712434
  0.90620000   2.46339998
  0.90620000   2.05700338
  0.90620000   2.46340454
  0.90620000   2.05697474
  0.90620000   2.46339770
  0.90620000   2.05696706
  0.90620000   2.46338902
  0.90620000   2.05696423
  0.90620000   2.46338062
  0.90620000   2.05696260
  0.90620000   2.46337289
  0.90620000   2.05696130
  0.90620000   2.46336585
  0.90620000   2.05696014
  0.90620000   2.46335944
  0.90620000   2.05695907
  0.90620000   2.46335360
  0.90620000   2.05695807
  0.90620000   2.46334824
  0.90620000   2.05695713
  0.90630000   2.05618781
  0.90630000   2.46447921
  0.90630000   2.05548096
  0.90630000   2.46455860
  0.90630000   2.05532565
  0.90630000   2.46456727
  0.90630000   2.05529069
  0.90630000   2.46456132
  0.90630000   2.05528184
  0.90630000   2.46455292
  0.90630000   2.05527878
  0.90630000   2.46454464
  0.90630000   2.05527708
  0.90630000   2.46453700
  0.90630000   2.05527575
  0.90630000   2.46453002
  0.90630000   2.05527457
  0.90630000   2.46452367
  0.90630000   2.05527348
  0.90630000   2.46451786
  0.90630000   2.05527246
  0.90630000   2.46451254
  0.90630000   2.05527150
  0.90640000   2.05491363
  0.90640000   2.46558679
  0.90640000   2.05388136
  0.90640000   2.46570369
  0.90640000   2.05366398
  0.90640000   2.46571958
  0.90640000   2.05361764
  0.90640000   2.46571516
  0.90640000   2.05360670
  0.90640000   2.46570717
  0.90640000   2.05360323
  0.90640000   2.46569907
  0.90640000   2.05360142
  0.90640000   2.46569152
  0.90640000   2.05360005
  0.90640000   2.46568462
  0.90640000   2.05359885
  0.90640000   2.46567833
  0.90640000   2.05359773
  0.90640000   2.46567257
  0.90640000   2.05359670
  0.90640000   2.46566729
  0.90640000   2.05359572
  0.90650000   2.05405656
  0.90650000   2.46663866
  0.90650000   2.05236858
  0.90650000   2.46683073
  0.90650000   2.05202575
  0.90650000   2.46686079
  0.90650000   2.05195672
  0.90650000   2.46685920
  0.90650000   2.05194168
  0.90650000   2.46685190
  0.90650000   2.05193742
  0.90650000   2.46684405
  0.90650000   2.05193544
  0.90650000   2.46683665
  0.90650000   2.05193401
  0.90650000   2.46682984
  0.90650000   2.05193278
  0.90650000   2.46682361
  0.90650000   2.05193165
  0.90650000   2.46681791
  0.90650000   2.05193059
  0.90650000   2.46681267
  0.90650000   2.05192961
  0.90660000   2.05428182
  0.90660000   2.46755617
  0.90660000   2.05107592
  0.90660000   2.46792582
  0.90660000   2.05043389
  0.90660000   2.46798848
  0.90660000   2.05031169
  0.90660000   2.46799308
  0.90660000   2.05028726
  0.90660000   2.46798715
  0.90660000   2.05028130
  0.90660000   2.46797972
  0.90660000   2.05027897
  0.90660000   2.46797252
  0.90660000   2.05027745
  0.90660000   2.46796583
  0.90660000   2.05027617
  0.90660000   2.46795969
  0.90660000   2.05027502
  0.90660000   2.46795405
  0.90660000   2.05027395
  0.90660000   2.46794887
  0.90660000   2.05027295
  0.90670000   2.05785241
  0.90670000   2.46802779
  0.90670000   2.05053730
  0.90670000   2.46893285
  0.90670000   2.04898193
  0.90670000   2.46909302
  0.90670000   2.04869791
  0.90670000   2.46911510
  0.90670000   2.04864590
  0.90670000   2.46911262
  0.90670000   2.04863513
  0.90670000   2.46910607
  0.90670000   2.04863191
  0.90670000   2.46909920
  0.90670000   2.04863019
  0.90670000   2.46909271
  0.90670000   2.04862885
  0.90670000   2.46908669
  0.90670000   2.04862767
  0.90670000   2.46908114
  0.90670000   2.04862658
  0.90670000   2.46907603
  0.90670000   2.04862557
  0.90680000   2.07316668
  0.90680000   2.46631673
  0.90680000   2.05376888
  0.90680000   2.46949924
  0.90680000   2.04826861
  0.90680000   2.47011434
  0.90680000   2.04721392
  0.90680000   2.47021491
  0.90680000   2.04703337
  0.90680000   2.47022632
  0.90680000   2.04700141
  0.90680000   2.47022263
  0.90680000   2.04699456
  0.90680000   2.47021659
  0.90680000   2.04699216
  0.90680000   2.47021045
  0.90680000   2.04699066
  0.90680000   2.47020466
  0.90680000   2.04698943
  0.90680000   2.47019926
  0.90680000   2.04698831
  0.90680000   2.47019426
  0.90680000   2.04698728
  0.90690000   2.12726415
  0.90690000   2.44962728
  0.90690000   2.08292733
  0.90690000   2.46500202
  0.90690000   2.05632503
  0.90690000   2.47009989
  0.90690000   2.04747961
  0.90690000   2.47113346
  0.90690000   2.04571015
  0.90690000   2.47130131
  0.90690000   2.04542080
  0.90690000   2.47132403
  0.90690000   2.04537338
  0.90690000   2.47132315
  0.90690000   2.04536434
  0.90690000   2.47131844
  0.90690000   2.04536165
  0.90690000   2.47131324
  0.90690000   2.04536016
  0.90690000   2.47130820
  0.90690000   2.04535896
  0.90690000   2.47130343
  0.90690000   2.04535790
  0.90700000   2.25918732
  0.90700000   2.35196335
  0.90700000   2.23735698
  0.90700000   2.37365455
  0.90700000   2.20574974
  0.90700000   2.40132020
  0.90700000   2.16312150
  0.90700000   2.43147460
  0.90700000   2.11396824
  0.90700000   2.45598149
  0.90700000   2.07223097
  0.90700000   2.46830296
  0.90700000   2.05080848
  0.90700000   2.47169777
  0.90700000   2.04493633
  0.90700000   2.47229748
  0.90700000   2.04392104
  0.90700000   2.47238852
  0.90700000   2.04376735
  0.90700000   2.47240043
  0.90700000   2.04374301
  0.90700000   2.47239975
  0.90700000   2.04373814
  0.90710000   2.40687701
  0.90710000   2.15476647
  0.90710000   2.43729030
  0.90710000   2.10463824
  0.90710000   2.46033486
  0.90710000   2.06507070
  0.90710000   2.47062304
  0.90710000   2.04712008
  0.90710000   2.47307103
  0.90710000   2.04289139
  0.90710000   2.47345599
  0.90710000   2.04223927
  0.90710000   2.47350809
  0.90710000   2.04214674
  0.90710000   2.47351200
  0.90710000   2.04213213
  0.90710000   2.47350865
  0.90710000   2.04212870
  0.90710000   2.47350419
  0.90710000   2.04212709
  0.90710000   2.47349967
  0.90710000   2.04212587
  0.90710000   2.47349531
  0.90720000   2.46448729
  0.90720000   2.05821776
  0.90720000   2.47269615
  0.90720000   2.04385744
  0.90720000   2.47436021
  0.90720000   2.04098826
  0.90720000   2.47459144
  0.90720000   2.04059248
  0.90720000   2.47461708
  0.90720000   2.04053924
  0.90720000   2.47461506
  0.90720000   2.04053040
  0.90720000   2.47460928
  0.90720000   2.04052772
  0.90720000   2.47460317
  0.90720000   2.04052608
  0.90720000   2.47459733
  0.90720000   2.04052474
  0.90720000   2.47459186
  0.90720000   2.04052353
  0.90720000   2.47458677
  0.90720000   2.04052242
  0.90720000   2.47458205
  0.90730000   2.47448024
  0.90730000   2.04107300
  0.90730000   2.47556657
  0.90730000   2.03920447
  0.90730000   2.47569889
  0.90730000   2.03897211
  0.90730000   2.47570857
  0.90730000   2.03894190
  0.90730000   2.47570298
  0.90730000   2.03893625
  0.90730000   2.47569566
  0.90730000   2.03893395
  0.90730000   2.47568850
  0.90730000   2.03893230
  0.90730000   2.47568182
  0.90730000   2.03893087
  0.90730000   2.47567566
  0.90730000   2.03892958
  0.90730000   2.47566998
  0.90730000   2.03892838
  0.90730000   2.47566475
  0.90730000   2.03892727
  0.90730000   2.47565992
  0.90740000   2.47661398
  0.90740000   2.03768041
  0.90740000   2.47677884
  0.90740000   2.03739160
  0.90740000   2.47678970
  0.90740000   2.03735715
  0.90740000   2.47678299
  0.90740000   2.03735107
  0.90740000   2.47677453
  0.90740000   2.03734861
  0.90740000   2.47676640
  0.90740000   2.03734682
  0.90740000   2.47675888
  0.90740000   2.03734526
  0.90740000   2.47675199
  0.90740000   2.03734386
  0.90740000   2.47674569
  0.90740000   2.03734256
  0.90740000   2.47673991
  0.90740000   2.03734136
  0.90740000   2.47673462
  0.90740000   2.03734024
  0.90740000   2.47672974
  0.90750000   2.47783741
  0.90750000   2.03584254
  0.90750000   2.47786250
  0.90750000   2.03578308
  0.90750000   2.47785603
  0.90750000   2.03577441
  0.90750000   2.47784656
  0.90750000   2.03577149
  0.90750000   2.47783737
  0.90750000   2.03576949
  0.90750000   2.47782893
  0.90750000   2.03576779
  0.90750000   2.47782123
  0.90750000   2.03576626
  0.90750000   2.47781423
  0.90750000   2.03576485
  0.90750000   2.47780785
  0.90750000   2.03576354
  0.90750000   2.47780203
  0.90750000   2.03576233
  0.90750000   2.47779669
  0.90750000   2.03576119
  0.90750000   2.47779179
  0.90760000   2.47892542
  0.90760000   2.03422272
  0.90760000   2.47892241
  0.90760000   2.03420644
  0.90760000   2.47891212
  0.90760000   2.03420252
  0.90760000   2.47890180
  0.90760000   2.03420022
  0.90760000   2.47889229
  0.90760000   2.03419834
  0.90760000   2.47888367
  0.90760000   2.03419665
  0.90760000   2.47887587
  0.90760000   2.03419511
  0.90760000   2.47886880
  0.90760000   2.03419369
  0.90760000   2.47886238
  0.90760000   2.03419238
  0.90760000   2.47885653
  0.90760000   2.03419115
  0.90760000   2.47885118
  0.90760000   2.03419001
  0.90760000   2.47884626
  0.90770000   2.47998175
  0.90770000   2.03264816
  0.90770000   2.47997155
  0.90770000   2.03264171
  0.90770000   2.47996003
  0.90770000   2.03263891
  0.90770000   2.47994931
  0.90770000   2.03263678
  0.90770000   2.47993962
  0.90770000   2.03263493
  0.90770000   2.47993089
  0.90770000   2.03263324
  0.90770000   2.47992302
  0.90770000   2.03263170
  0.90770000   2.47991591
  0.90770000   2.03263026
  0.90770000   2.47990946
  0.90770000   2.03262894
  0.90770000   2.47990359
  0.90770000   2.03262770
  0.90770000   2.47989822
  0.90770000   2.03262654
  0.90770000   2.47989330
  0.90780000   2.48102494
  0.90780000   2.03108937
  0.90780000   2.48101240
  0.90780000   2.03108552
  0.90780000   2.48100031
  0.90780000   2.03108305
  0.90780000   2.48098937
  0.90780000   2.03108098
  0.90780000   2.48097955
  0.90780000   2.03107912
  0.90780000   2.48097075
  0.90780000   2.03107743
  0.90780000   2.48096284
  0.90780000   2.03107587
  0.90780000   2.48095571
  0.90780000   2.03107442
  0.90780000   2.48094924
  0.90780000   2.03107308
  0.90780000   2.48094336
  0.90780000   2.03107183
  0.90780000   2.48093798
  0.90780000   2.03107066
  0.90780000   2.48093305
  0.90790000   2.48205919
  0.90790000   2.02954011
  0.90790000   2.48204567
  0.90790000   2.02953706
  0.90790000   2.48203327
  0.90790000   2.02953470
  0.90790000   2.48202217
  0.90790000   2.02953265
  0.90790000   2.48201228
  0.90790000   2.02953078
  0.90790000   2.48200343
  0.90790000   2.02952908
  0.90790000   2.48199549
  0.90790000   2.02952750
  0.90790000   2.48198834
  0.90790000   2.02952605
  0.90790000   2.48198186
  0.90790000   2.02952469
  0.90790000   2.48197597
  0.90790000   2.02952343
  0.90790000   2.48197059
  0.90790000   2.02952225
  0.90790000   2.48196566
  0.90800000   2.48308574
  0.90800000   2.02799880
  0.90800000   2.48307170
  0.90800000   2.02799603
  0.90800000   2.48305909
  0.90800000   2.02799372
  0.90800000   2.48304789
  0.90800000   2.02799166
  0.90800000   2.48303793
  0.90800000   2.02798979
  0.90800000   2.48302906
  0.90800000   2.02798807
  0.90800000   2.48302110
  0.90800000   2.02798648
  0.90800000   2.48301393
  0.90800000   2.02798501
  0.90800000   2.48300745
  0.90800000   2.02798364
  0.90800000   2.48300155
  0.90800000   2.02798236
  0.90800000   2.48299617
  0.90800000   2.02798117
  0.90800000   2.48299124
  0.90810000   2.48410506
  0.90810000   2.02646492
  0.90810000   2.48409069
  0.90810000   2.02646226
  0.90810000   2.48407794
  0.90810000   2.02645997
  0.90810000   2.48406666
  0.90810000   2.02645790
  0.90810000   2.48405667
  0.90810000   2.02645602
  0.90810000   2.48404776
  0.90810000   2.02645428
  0.90810000   2.48403979
  0.90810000   2.02645268
  0.90810000   2.48403262
  0.90810000   2.02645119
  0.90810000   2.48402613
  0.90810000   2.02644981
  0.90810000   2.48402023
  0.90810000   2.02644852
  0.90810000   2.48401486
  0.90810000   2.02644732
  0.90810000   2.48400993
  0.90820000   2.48511740
  0.90820000   2.02493823
  0.90820000   2.48510281
  0.90820000   2.02493562
  0.90820000   2.48508995
  0.90820000   2.02493333
  0.90820000   2.48507862
  0.90820000   2.02493125
  0.90820000   2.48506860
  0.90820000   2.02492934
  0.90820000   2.48505968
  0.90820000   2.02492759
  0.90820000   2.48505170
  0.90820000   2.02492597
  0.90820000   2.48504452
  0.90820000   2.02492447
  0.90820000   2.48503803
  0.90820000   2.02492308
  0.90820000   2.48503214
  0.90820000   2.02492178
  0.90820000   2.48502676
  0.90820000   2.02492057
  0.90820000   2.48502184
  0.90830000   2.48612295
  0.90830000   2.02341857
  0.90830000   2.48610820
  0.90830000   2.02341598
  0.90830000   2.48609526
  0.90830000   2.02341368
  0.90830000   2.48608389
  0.90830000   2.02341158
  0.90830000   2.48607385
  0.90830000   2.02340966
  0.90830000   2.48606492
  0.90830000   2.02340789
  0.90830000   2.48605693
  0.90830000   2.02340626
  0.90830000   2.48604976
  0.90830000   2.02340474
  0.90830000   2.48604327
  0.90830000   2.02340334
  0.90830000   2.48603738
  0.90830000   2.02340203
  0.90830000   2.48603201
  0.90830000   2.02340081
  0.90830000   2.48602709
  0.90840000   2.48712186
  0.90840000   2.02190581
  0.90840000   2.48710699
  0.90840000   2.02190323
  0.90840000   2.48709399
  0.90840000   2.02190091
  0.90840000   2.48708260
  0.90840000   2.02189880
  0.90840000   2.48707254
  0.90840000   2.02189686
  0.90840000   2.48706360
  0.90840000   2.02189507
  0.90840000   2.48705562
  0.90840000   2.02189342
  0.90840000   2.48704844
  0.90840000   2.02189189
  0.90840000   2.48704195
  0.90840000   2.02189047
  0.90840000   2.48703607
  0.90840000   2.02188915
  0.90840000   2.48703070
  0.90840000   2.02188792
  0.90840000   2.48702579
  0.90850000   2.48811426
  0.90850000   2.02039983
  0.90850000   2.48809930
  0.90850000   2.02039725
  0.90850000   2.48808626
  0.90850000   2.02039491
  0.90850000   2.48807484
  0.90850000   2.02039278
  0.90850000   2.48806477
  0.90850000   2.02039082
  0.90850000   2.48805584
  0.90850000   2.02038902
  0.90850000   2.48804785
  0.90850000   2.02038735
  0.90850000   2.48804068
  0.90850000   2.02038581
  0.90850000   2.48803420
  0.90850000   2.02038438
  0.90850000   2.48802832
  0.90850000   2.02038305
  0.90850000   2.48802295
  0.90850000   2.02038181
  0.90850000   2.48801804
  0.90860000   2.48910028
  0.90860000   2.01890053
  0.90860000   2.48908525
  0.90860000   2.01889793
  0.90860000   2.48907218
  0.90860000   2.01889558
  0.90860000   2.48906074
  0.90860000   2.01889343
  0.90860000   2.48905067
  0.90860000   2.01889145
  0.90860000   2.48904173
  0.90860000   2.01888963
  0.90860000   2.48903375
  0.90860000   2.01888795
  0.90860000   2.48902658
  0.90860000   2.01888639
  0.90860000   2.48902011
  0.90860000   2.01888495
  0.90860000   2.48901423
  0.90860000   2.01888361
  0.90860000   2.48900887
  0.90860000   2.01888237
  0.90860000   2.48900396
  0.90870000   2.49008002
  0.90870000   2.01740780
  0.90870000   2.49006494
  0.90870000   2.01740519
  0.90870000   2.49005185
  0.90870000   2.01740281
  0.90870000   2.49004040
  0.90870000   2.01740063
  0.90870000   2.49003033
  0.90870000   2.01739864
  0.90870000   2.49002139
  0.90870000   2.01739680
  0.90870000   2.49001341
  0.90870000   2.01739511
  0.90870000   2.49000625
  0.90870000   2.01739354
  0.90870000   2.48999978
  0.90870000   2.01739209
  0.90870000   2.48999391
  0.90870000   2.01739074
  0.90870000   2.48998856
  0.90870000   2.01738949
  0.90870000   2.48998366
  0.90880000   2.49105361
  0.90880000   2.01592154
  0.90880000   2.49103848
  0.90880000   2.01591890
  0.90880000   2.49102537
  0.90880000   2.01591650
  0.90880000   2.49101392
  0.90880000   2.01591431
  0.90880000   2.49100385
  0.90880000   2.01591230
  0.90880000   2.49099491
  0.90880000   2.01591044
  0.90880000   2.49098694
  0.90880000   2.01590873
  0.90880000   2.49097978
  0.90880000   2.01590716
  0.90880000   2.49097332
  0.90880000   2.01590569
  0.90880000   2.49096746
  0.90880000   2.01590433
  0.90880000   2.49096211
  0.90880000   2.01590307
  0.90880000   2.49095722
  0.90890000   2.49202113
  0.90890000   2.01444164
  0.90890000   2.49200597
  0.90890000   2.01443898
  0.90890000   2.49199285
  0.90890000   2.01443656
  0.90890000   2.49198140
  0.90890000   2.01443434
  0.90890000   2.49197133
  0.90890000   2.01443231
  0.90890000   2.49196240
  0.90890000   2.01443045
  0.90890000   2.49195444
  0.90890000   2.01442872
  0.90890000   2.49194728
  0.90890000   2.01442713
  0.90890000   2.49194083
  0.90890000   2.01442566
  0.90890000   2.49193497
  0.90890000   2.01442429
  0.90890000   2.49192963
  0.90890000   2.01442302
  0.90890000   2.49192474
  0.90900000   2.49298270
  0.90900000   2.01296801
  0.90900000   2.49296752
  0.90900000   2.01296533
  0.90900000   2.49295439
  0.90900000   2.01296289
  0.90900000   2.49294294
  0.90900000   2.01296065
  0.90900000   2.49293287
  0.90900000   2.01295861
  0.90900000   2.49292395
  0.90900000   2.01295672
  0.90900000   2.49291599
  0.90900000   2.01295499
  0.90900000   2.49290885
  0.90900000   2.01295338
  0.90900000   2.49290240
  0.90900000   2.01295190
  0.90900000   2.49289655
  0.90900000   2.01295052
  0.90900000   2.49289121
  0.90900000   2.01294924
  0.90900000   2.49288633
  0.90910000   2.49393840
  0.90910000   2.01150057
  0.90910000   2.49392321
  0.90910000   2.01149786
  0.90910000   2.49391007
  0.90910000   2.01149540
  0.90910000   2.49389863
  0.90910000   2.01149314
  0.90910000   2.49388856
  0.90910000   2.01149107
  0.90910000   2.49387965
  0.90910000   2.01148918
  0.90910000   2.49387170
  0.90910000   2.01148743
  0.90910000   2.49386456
  0.90910000   2.01148581
  0.90910000   2.49385812
  0.90910000   2.01148432
  0.90910000   2.49385228
  0.90910000   2.01148294
  0.90910000   2.49384695
  0.90910000   2.01148165
  0.90910000   2.49384208
  0.90920000   2.49488834
  0.90920000   2.01003921
  0.90920000   2.49487313
  0.90920000   2.01003648
  0.90920000   2.49486000
  0.90920000   2.01003399
  0.90920000   2.49484856
  0.90920000   2.01003172
  0.90920000   2.49483850
  0.90920000   2.01002963
  0.90920000   2.49482959
  0.90920000   2.01002772
  0.90920000   2.49482165
  0.90920000   2.01002596
  0.90920000   2.49481452
  0.90920000   2.01002434
  0.90920000   2.49480809
  0.90920000   2.01002283
  0.90920000   2.49480225
  0.90920000   2.01002144
  0.90920000   2.49479693
  0.90920000   2.01002014
  0.90920000   2.49479207
  0.90930000   2.49583260
  0.90930000   2.00858386
  0.90930000   2.49581738
  0.90930000   2.00858110
  0.90930000   2.49580425
  0.90930000   2.00857859
  0.90930000   2.49579282
  0.90930000   2.00857629
  0.90930000   2.49578277
  0.90930000   2.00857420
  0.90930000   2.49577387
  0.90930000   2.00857227
  0.90930000   2.49576593
  0.90930000   2.00857049
  0.90930000   2.49575881
  0.90930000   2.00856886
  0.90930000   2.49575239
  0.90930000   2.00856735
  0.90930000   2.49574656
  0.90930000   2.00856594
  0.90930000   2.49574125
  0.90930000   2.00856464
  0.90930000   2.49573639
  0.90940000   2.49677126
  0.90940000   2.00713442
  0.90940000   2.49675605
  0.90940000   2.00713164
  0.90940000   2.49674292
  0.90940000   2.00712910
  0.90940000   2.49673149
  0.90940000   2.00712679
  0.90940000   2.49672145
  0.90940000   2.00712467
  0.90940000   2.49671256
  0.90940000   2.00712273
  0.90940000   2.49670464
  0.90940000   2.00712095
  0.90940000   2.49669753
  0.90940000   2.00711930
  0.90940000   2.49669111
  0.90940000   2.00711778
  0.90940000   2.49668529
  0.90940000   2.00711637
  0.90940000   2.49667999
  0.90940000   2.00711506
  0.90940000   2.49667513
  0.90950000   2.49770443
  0.90950000   2.00569081
  0.90950000   2.49768921
  0.90950000   2.00568800
  0.90950000   2.49767609
  0.90950000   2.00568545
  0.90950000   2.49766467
  0.90950000   2.00568312
  0.90950000   2.49765464
  0.90950000   2.00568099
  0.90950000   2.49764576
  0.90950000   2.00567903
  0.90950000   2.49763784
  0.90950000   2.00567723
  0.90950000   2.49763074
  0.90950000   2.00567558
  0.90950000   2.49762433
  0.90950000   2.00567404
  0.90950000   2.49761852
  0.90950000   2.00567263
  0.90950000   2.49761322
  0.90950000   2.00567131
  0.90950000   2.49760838
  0.90960000   2.49863217
  0.90960000   2.00425295
  0.90960000   2.49861695
  0.90960000   2.00425012
  0.90960000   2.49860384
  0.90960000   2.00424754
  0.90960000   2.49859243
  0.90960000   2.00424519
  0.90960000   2.49858241
  0.90960000   2.00424305
  0.90960000   2.49857354
  0.90960000   2.00424108
  0.90960000   2.49856563
  0.90960000   2.00423927
  0.90960000   2.49855854
  0.90960000   2.00423760
  0.90960000   2.49855214
  0.90960000   2.00423606
  0.90960000   2.49854634
  0.90960000   2.00423464
  0.90960000   2.49854105
  0.90960000   2.00423331
  0.90960000   2.49853621
  0.90970000   2.49955457
  0.90970000   2.00282077
  0.90970000   2.49953936
  0.90970000   2.00281791
  0.90970000   2.49952626
  0.90970000   2.00281531
  0.90970000   2.49951485
  0.90970000   2.00281295
  0.90970000   2.49950485
  0.90970000   2.00281078
  0.90970000   2.49949598
  0.90970000   2.00280880
  0.90970000   2.49948809
  0.90970000   2.00280698
  0.90970000   2.49948100
  0.90970000   2.00280530
  0.90970000   2.49947461
  0.90970000   2.00280376
  0.90970000   2.49946882
  0.90970000   2.00280232
  0.90970000   2.49946353
  0.90970000   2.00280099
  0.90970000   2.49945870
  0.90980000   2.50047171
  0.90980000   2.00139417
  0.90980000   2.50045651
  0.90980000   2.00139129
  0.90980000   2.50044341
  0.90980000   2.00138867
  0.90980000   2.50043202
  0.90980000   2.00138629
  0.90980000   2.50042202
  0.90980000   2.00138411
  0.90980000   2.50041318
  0.90980000   2.00138212
  0.90980000   2.50040529
  0.90980000   2.00138029
  0.90980000   2.50039821
  0.90980000   2.00137860
  0.90980000   2.50039183
  0.90980000   2.00137704
  0.90980000   2.50038604
  0.90980000   2.00137560
  0.90980000   2.50038077
  0.90980000   2.00137426
  0.90980000   2.50037594
  0.90990000   2.50138367
  0.90990000   1.99997310
  0.90990000   2.50136847
  0.90990000   1.99997019
  0.90990000   2.50135539
  0.90990000   1.99996756
  0.90990000   2.50134401
  0.90990000   1.99996515
  0.90990000   2.50133402
  0.90990000   1.99996296
  0.90990000   2.50132518
  0.90990000   1.99996095
  0.90990000   2.50131731
  0.90990000   1.99995911
  0.90990000   2.50131024
  0.90990000   1.99995742
  0.90990000   2.50130387
  0.90990000   1.99995585
  0.90990000   2.50129809
  0.90990000   1.99995440
  0.90990000   2.50129282
  0.90990000   1.99995306
  0.90990000   2.50128800
  0.91000000   2.50229051
  0.91000000   1.99855747
  0.91000000   2.50227532
  0.91000000   1.99855454
  0.91000000   2.50226225
  0.91000000   1.99855188
  0.91000000   2.50225089
  0.91000000   1.99854946
  0.91000000   2.50224091
  0.91000000   1.99854725
  0.91000000   2.50223209
  0.91000000   1.99854523
  0.91000000   2.50222422
  0.91000000   1.99854338
  0.91000000   2.50221716
  0.91000000   1.99854168
  0.91000000   2.50221080
  0.91000000   1.99854010
  0.91000000   2.50220503
  0.91000000   1.99853865
  0.91000000   2.50219976
  0.91000000   1.99853730
  0.91000000   2.50219495
  0.91010000   2.50319232
  0.91010000   1.99714721
  0.91010000   2.50317715
  0.91010000   1.99714425
  0.91010000   2.50316409
  0.91010000   1.99714158
  0.91010000   2.50315273
  0.91010000   1.99713914
  0.91010000   2.50314277
  0.91010000   1.99713692
  0.91010000   2.50313395
  0.91010000   1.99713489
  0.91010000   2.50312610
  0.91010000   1.99713302
  0.91010000   2.50311905
  0.91010000   1.99713131
  0.91010000   2.50311269
  0.91010000   1.99712973
  0.91010000   2.50310693
  0.91010000   1.99712827
  0.91010000   2.50310168
  0.91010000   1.99712691
  0.91010000   2.50309687
  0.91020000   2.50408916
  0.91020000   1.99574226
  0.91020000   2.50407400
  0.91020000   1.99573927
  0.91020000   2.50406096
  0.91020000   1.99573657
  0.91020000   2.50404962
  0.91020000   1.99573412
  0.91020000   2.50403966
  0.91020000   1.99573189
  0.91020000   2.50403086
  0.91020000   1.99572984
  0.91020000   2.50402301
  0.91020000   1.99572797
  0.91020000   2.50401598
  0.91020000   1.99572625
  0.91020000   2.50400963
  0.91020000   1.99572466
  0.91020000   2.50400387
  0.91020000   1.99572319
  0.91020000   2.50399863
  0.91020000   1.99572183
  0.91020000   2.50399383
  0.91030000   2.50498111
  0.91030000   1.99434253
  0.91030000   2.50496597
  0.91030000   1.99433952
  0.91030000   2.50495294
  0.91030000   1.99433680
  0.91030000   2.50494161
  0.91030000   1.99433433
  0.91030000   2.50493167
  0.91030000   1.99433209
  0.91030000   2.50492287
  0.91030000   1.99433003
  0.91030000   2.50491504
  0.91030000   1.99432815
  0.91030000   2.50490801
  0.91030000   1.99432642
  0.91030000   2.50490167
  0.91030000   1.99432482
  0.91030000   2.50489592
  0.91030000   1.99432335
  0.91030000   2.50489069
  0.91030000   1.99432198
  0.91030000   2.50488589
  0.91040000   2.50586823
  0.91040000   1.99294797
  0.91040000   2.50585311
  0.91040000   1.99294493
  0.91040000   2.50584009
  0.91040000   1.99294220
  0.91040000   2.50582877
  0.91040000   1.99293971
  0.91040000   2.50581885
  0.91040000   1.99293745
  0.91040000   2.50581006
  0.91040000   1.99293539
  0.91040000   2.50580224
  0.91040000   1.99293350
  0.91040000   2.50579522
  0.91040000   1.99293176
  0.91040000   2.50578889
  0.91040000   1.99293015
  0.91040000   2.50578315
  0.91040000   1.99292867
  0.91040000   2.50577792
  0.91040000   1.99292730
  0.91040000   2.50577314
  0.91050000   2.50675060
  0.91050000   1.99155851
  0.91050000   2.50673549
  0.91050000   1.99155544
  0.91050000   2.50672248
  0.91050000   1.99155269
  0.91050000   2.50671118
  0.91050000   1.99155019
  0.91050000   2.50670126
  0.91050000   1.99154792
  0.91050000   2.50669249
  0.91050000   1.99154584
  0.91050000   2.50668468
  0.91050000   1.99154394
  0.91050000   2.50667767
  0.91050000   1.99154219
  0.91050000   2.50667135
  0.91050000   1.99154058
  0.91050000   2.50666562
  0.91050000   1.99153910
  0.91050000   2.50666040
  0.91050000   1.99153772
  0.91050000   2.50665562
  0.91060000   2.50762827
  0.91060000   1.99017407
  0.91060000   2.50761317
  0.91060000   1.99017098
  0.91060000   2.50760018
  0.91060000   1.99016822
  0.91060000   2.50758889
  0.91060000   1.99016570
  0.91060000   2.50757899
  0.91060000   1.99016341
  0.91060000   2.50757024
  0.91060000   1.99016133
  0.91060000   2.50756243
  0.91060000   1.99015942
  0.91060000   2.50755543
  0.91060000   1.99015767
  0.91060000   2.50754912
  0.91060000   1.99015605
  0.91060000   2.50754340
  0.91060000   1.99015455
  0.91060000   2.50753818
  0.91060000   1.99015317
  0.91060000   2.50753341
  0.91070000   2.50850131
  0.91070000   1.98879460
  0.91070000   2.50848623
  0.91070000   1.98879150
  0.91070000   2.50847325
  0.91070000   1.98878871
  0.91070000   2.50846198
  0.91070000   1.98878619
  0.91070000   2.50845209
  0.91070000   1.98878389
  0.91070000   2.50844335
  0.91070000   1.98878179
  0.91070000   2.50843555
  0.91070000   1.98877987
  0.91070000   2.50842856
  0.91070000   1.98877811
  0.91070000   2.50842226
  0.91070000   1.98877649
  0.91070000   2.50841654
  0.91070000   1.98877499
  0.91070000   2.50841134
  0.91070000   1.98877359
  0.91070000   2.50840657
  0.91080000   2.50936979
  0.91080000   1.98742004
  0.91080000   2.50935472
  0.91080000   1.98741692
  0.91080000   2.50934176
  0.91080000   1.98741412
  0.91080000   2.50933050
  0.91080000   1.98741158
  0.91080000   2.50932062
  0.91080000   1.98740927
  0.91080000   2.50931189
  0.91080000   1.98740716
  0.91080000   2.50930411
  0.91080000   1.98740523
  0.91080000   2.50929713
  0.91080000   1.98740346
  0.91080000   2.50929083
  0.91080000   1.98740183
  0.91080000   2.50928513
  0.91080000   1.98740033
  0.91080000   2.50927993
  0.91080000   1.98739893
  0.91080000   2.50927517
  0.91090000   2.51023377
  0.91090000   1.98605031
  0.91090000   2.51021870
  0.91090000   1.98604720
  0.91090000   2.51020576
  0.91090000   1.98604437
  0.91090000   2.51019452
  0.91090000   1.98604182
  0.91090000   2.51018465
  0.91090000   1.98603949
  0.91090000   2.51017593
  0.91090000   1.98603738
  0.91090000   2.51016816
  0.91090000   1.98603544
  0.91090000   2.51016119
  0.91090000   1.98603367
  0.91090000   2.51015490
  0.91090000   1.98603203
  0.91090000   2.51014920
  0.91090000   1.98603052
  0.91090000   2.51014401
  0.91090000   1.98602912
  0.91090000   2.51013926
  0.91100000   2.51109330
  0.91100000   1.98468537
  0.91100000   2.51107824
  0.91100000   1.98468226
  0.91100000   2.51106532
  0.91100000   1.98467941
  0.91100000   2.51105408
  0.91100000   1.98467685
  0.91100000   2.51104423
  0.91100000   1.98467451
  0.91100000   2.51103552
  0.91100000   1.98467239
  0.91100000   2.51102776
  0.91100000   1.98467044
  0.91100000   2.51102080
  0.91100000   1.98466866
  0.91100000   2.51101452
  0.91100000   1.98466702
  0.91100000   2.51100883
  0.91100000   1.98466550
  0.91100000   2.51100364
  0.91100000   1.98466409
  0.91100000   2.51099890
  0.91110000   2.51194845
  0.91110000   1.98332515
  0.91110000   2.51193339
  0.91110000   1.98332206
  0.91110000   2.51192048
  0.91110000   1.98331919
  0.91110000   2.51190926
  0.91110000   1.98331661
  0.91110000   2.51189943
  0.91110000   1.98331426
  0.91110000   2.51189073
  0.91110000   1.98331213
  0.91110000   2.51188297
  0.91110000   1.98331018
  0.91110000   2.51187603
  0.91110000   1.98330839
  0.91110000   2.51186976
  0.91110000   1.98330674
  0.91110000   2.51186407
  0.91110000   1.98330521
  0.91110000   2.51185889
  0.91110000   1.98330380
  0.91110000   2.51185416
  0.91120000   2.51279927
  0.91120000   1.98196959
  0.91120000   2.51278420
  0.91120000   1.98196654
  0.91120000   2.51277132
  0.91120000   1.98196363
  0.91120000   2.51276011
  0.91120000   1.98196105
  0.91120000   2.51275029
  0.91120000   1.98195869
  0.91120000   2.51274160
  0.91120000   1.98195654
  0.91120000   2.51273386
  0.91120000   1.98195459
  0.91120000   2.51272692
  0.91120000   1.98195279
  0.91120000   2.51272066
  0.91120000   1.98195113
  0.91120000   2.51271498
  0.91120000   1.98194960
  0.91120000   2.51270981
  0.91120000   1.98194819
  0.91120000   2.51270508
  0.91130000   2.51364583
  0.91130000   1.98061864
  0.91130000   2.51363074
  0.91130000   1.98061564
  0.91130000   2.51361788
  0.91130000   1.98061270
  0.91130000   2.51360669
  0.91130000   1.98061010
  0.91130000   2.51359688
  0.91130000   1.98060773
  0.91130000   2.51358820
  0.91130000   1.98060558
  0.91130000   2.51358047
  0.91130000   1.98060361
  0.91130000   2.51357354
  0.91130000   1.98060181
  0.91130000   2.51356729
  0.91130000   1.98060015
  0.91130000   2.51356162
  0.91130000   1.98059861
  0.91130000   2.51355646
  0.91130000   1.98059720
  0.91130000   2.51355173
  0.91140000   2.51448816
  0.91140000   1.97927225
  0.91140000   2.51447306
  0.91140000   1.97926930
  0.91140000   2.51446023
  0.91140000   1.97926632
  0.91140000   2.51444905
  0.91140000   1.97926372
  0.91140000   2.51443925
  0.91140000   1.97926134
  0.91140000   2.51443058
  0.91140000   1.97925918
  0.91140000   2.51442286
  0.91140000   1.97925721
  0.91140000   2.51441594
  0.91140000   1.97925539
  0.91140000   2.51440970
  0.91140000   1.97925373
  0.91140000   2.51440404
  0.91140000   1.97925219
  0.91140000   2.51439888
  0.91140000   1.97925077
  0.91140000   2.51439417
  0.91150000   2.51532634
  0.91150000   1.97793036
  0.91150000   2.51531121
  0.91150000   1.97792748
  0.91150000   2.51529841
  0.91150000   1.97792446
  0.91150000   2.51528724
  0.91150000   1.97792186
  0.91150000   2.51527745
  0.91150000   1.97791946
  0.91150000   2.51526880
  0.91150000   1.97791729
  0.91150000   2.51526109
  0.91150000   1.97791531
  0.91150000   2.51525418
  0.91150000   1.97791349
  0.91150000   2.51524794
  0.91150000   1.97791182
  0.91150000   2.51524229
  0.91150000   1.97791028
  0.91150000   2.51523714
  0.91150000   1.97790885
  0.91150000   2.51523243
  0.91160000   2.51616040
  0.91160000   1.97659293
  0.91160000   2.51614524
  0.91160000   1.97659012
  0.91160000   2.51613248
  0.91160000   1.97658705
  0.91160000   2.51612132
  0.91160000   1.97658445
  0.91160000   2.51611155
  0.91160000   1.97658204
  0.91160000   2.51610290
  0.91160000   1.97657987
  0.91160000   2.51609521
  0.91160000   1.97657787
  0.91160000   2.51608830
  0.91160000   1.97657605
  0.91160000   2.51608208
  0.91160000   1.97657437
  0.91160000   2.51607643
  0.91160000   1.97657283
  0.91160000   2.51607129
  0.91160000   1.97657139
  0.91160000   2.51606659
  0.91170000   2.51699040
  0.91170000   1.97525991
  0.91170000   2.51697522
  0.91170000   1.97525716
  0.91170000   2.51696249
  0.91170000   1.97525405
  0.91170000   2.51695133
  0.91170000   1.97525145
  0.91170000   2.51694158
  0.91170000   1.97524903
  0.91170000   2.51693295
  0.91170000   1.97524684
  0.91170000   2.51692526
  0.91170000   1.97524485
  0.91170000   2.51691837
  0.91170000   1.97524302
  0.91170000   2.51691215
  0.91170000   1.97524133
  0.91170000   2.51690651
  0.91170000   1.97523978
  0.91170000   2.51690138
  0.91170000   1.97523835
  0.91170000   2.51689668
  0.91180000   2.51781639
  0.91180000   1.97393125
  0.91180000   2.51780119
  0.91180000   1.97392856
  0.91180000   2.51778849
  0.91180000   1.97392541
  0.91180000   2.51777734
  0.91180000   1.97392281
  0.91180000   2.51776760
  0.91180000   1.97392037
  0.91180000   2.51775898
  0.91180000   1.97391818
  0.91180000   2.51775130
  0.91180000   1.97391617
  0.91180000   2.51774442
  0.91180000   1.97391434
  0.91180000   2.51773821
  0.91180000   1.97391265
  0.91180000   2.51773258
  0.91180000   1.97391110
  0.91180000   2.51772745
  0.91180000   1.97390966
  0.91180000   2.51772276
  0.91190000   2.51863841
  0.91190000   1.97260692
  0.91190000   2.51862320
  0.91190000   1.97260427
  0.91190000   2.51861052
  0.91190000   1.97260108
  0.91190000   2.51859939
  0.91190000   1.97259847
  0.91190000   2.51858966
  0.91190000   1.97259603
  0.91190000   2.51858105
  0.91190000   1.97259383
  0.91190000   2.51857339
  0.91190000   1.97259182
  0.91190000   2.51856651
  0.91190000   1.97258997
  0.91190000   2.51856031
  0.91190000   1.97258828
  0.91190000   2.51855469
  0.91190000   1.97258672
  0.91190000   2.51854957
  0.91190000   1.97258528
  0.91190000   2.51854489
  0.91200000   2.51945650
  0.91200000   1.97128688
  0.91200000   2.51944130
  0.91200000   1.97128422
  0.91200000   2.51942865
  0.91200000   1.97128101
  0.91200000   2.51941753
  0.91200000   1.97127840
  0.91200000   2.51940782
  0.91200000   1.97127594
  0.91200000   2.51939922
  0.91200000   1.97127373
  0.91200000   2.51939156
  0.91200000   1.97127171
  0.91200000   2.51938469
  0.91200000   1.97126987
  0.91200000   2.51937850
  0.91200000   1.97126817
  0.91200000   2.51937289
  0.91200000   1.97126661
  0.91200000   2.51936777
  0.91200000   1.97126516
  0.91200000   2.51936310
  0.91210000   2.52027070
  0.91210000   1.96997109
  0.91210000   2.52025555
  0.91210000   1.96996837
  0.91210000   2.52024291
  0.91210000   1.96996516
  0.91210000   2.52023180
  0.91210000   1.96996253
  0.91210000   2.52022210
  0.91210000   1.96996006
  0.91210000   2.52021351
  0.91210000   1.96995785
  0.91210000   2.52020587
  0.91210000   1.96995583
  0.91210000   2.52019901
  0.91210000   1.96995398
  0.91210000   2.52019283
  0.91210000   1.96995227
  0.91210000   2.52018722
  0.91210000   1.96995070
  0.91210000   2.52018211
  0.91210000   1.96994925
  0.91210000   2.52017744
  0.91220000   2.52108106
  0.91220000   1.96865953
  0.91220000   2.52106599
  0.91220000   1.96865666
  0.91220000   2.52105334
  0.91220000   1.96865348
  0.91220000   2.52104225
  0.91220000   1.96865083
  0.91220000   2.52103257
  0.91220000   1.96864836
  0.91220000   2.52102399
  0.91220000   1.96864614
  0.91220000   2.52101636
  0.91220000   1.96864411
  0.91220000   2.52100951
  0.91220000   1.96864225
  0.91220000   2.52100333
  0.91220000   1.96864054
  0.91220000   2.52099774
  0.91220000   1.96863897
  0.91220000   2.52099264
  0.91220000   1.96863751
  0.91220000   2.52098797
  0.91230000   2.52188760
  0.91230000   1.96735217
  0.91230000   2.52187267
  0.91230000   1.96734904
  0.91230000   2.52186000
  0.91230000   1.96734593
  0.91230000   2.52184894
  0.91230000   1.96734325
  0.91230000   2.52183927
  0.91230000   1.96734077
  0.91230000   2.52183070
  0.91230000   1.96733854
  0.91230000   2.52182308
  0.91230000   1.96733651
  0.91230000   2.52181624
  0.91230000   1.96733464
  0.91230000   2.52181007
  0.91230000   1.96733293
  0.91230000   2.52180448
  0.91230000   1.96733136
  0.91230000   2.52179939
  0.91230000   1.96732990
  0.91230000   2.52179473
  0.91240000   2.52269038
  0.91240000   1.96604898
  0.91240000   2.52267565
  0.91240000   1.96604546
  0.91240000   2.52266293
  0.91240000   1.96604248
  0.91240000   2.52265191
  0.91240000   1.96603973
  0.91240000   2.52264224
  0.91240000   1.96603727
  0.91240000   2.52263369
  0.91240000   1.96603503
  0.91240000   2.52262607
  0.91240000   1.96603298
  0.91240000   2.52261924
  0.91240000   1.96603112
  0.91240000   2.52261308
  0.91240000   1.96602940
  0.91240000   2.52260750
  0.91240000   1.96602782
  0.91240000   2.52260241
  0.91240000   1.96602636
  0.91240000   2.52259776
  0.91250000   2.52348941
  0.91250000   1.96474994
  0.91250000   2.52347498
  0.91250000   1.96474586
  0.91250000   2.52346216
  0.91250000   1.96474307
  0.91250000   2.52345120
  0.91250000   1.96474024
  0.91250000   2.52344152
  0.91250000   1.96473780
  0.91250000   2.52343299
  0.91250000   1.96473554
  0.91250000   2.52342538
  0.91250000   1.96473350
  0.91250000   2.52341856
  0.91250000   1.96473162
  0.91250000   2.52341241
  0.91250000   1.96472990
  0.91250000   2.52340684
  0.91250000   1.96472831
  0.91250000   2.52340176
  0.91250000   1.96472685
  0.91250000   2.52339711
  0.91260000   2.52428473
  0.91260000   1.96345503
  0.91260000   2.52427069
  0.91260000   1.96345019
  0.91260000   2.52425775
  0.91260000   1.96344769
  0.91260000   2.52424686
  0.91260000   1.96344472
  0.91260000   2.52423717
  0.91260000   1.96344232
  0.91260000   2.52422866
  0.91260000   1.96344004
  0.91260000   2.52422105
  0.91260000   1.96343799
  0.91260000   2.52421425
  0.91260000   1.96343611
  0.91260000   2.52420810
  0.91260000   1.96343439
  0.91260000   2.52420253
  0.91260000   1.96343280
  0.91260000   2.52419746
  0.91260000   1.96343133
  0.91260000   2.52419282
  0.91270000   2.52507637
  0.91270000   1.96216423
  0.91270000   2.52506285
  0.91270000   1.96215839
  0.91270000   2.52504972
  0.91270000   1.96215628
  0.91270000   2.52503892
  0.91270000   1.96215314
  0.91270000   2.52502922
  0.91270000   1.96215080
  0.91270000   2.52502073
  0.91270000   1.96214848
  0.91270000   2.52501313
  0.91270000   1.96214645
  0.91270000   2.52500634
  0.91270000   1.96214455
  0.91270000   2.52500020
  0.91270000   1.96214283
  0.91270000   2.52499464
  0.91270000   1.96214123
  0.91270000   2.52498957
  0.91270000   1.96213976
  0.91270000   2.52498494
  0.91280000   2.52586437
  0.91280000   1.96087753
  0.91280000   2.52585150
  0.91280000   1.96087040
  0.91280000   2.52583812
  0.91280000   1.96086882
  0.91280000   2.52582745
  0.91280000   1.96086544
  0.91280000   2.52581771
  0.91280000   1.96086319
  0.91280000   2.52580925
  0.91280000   1.96086082
  0.91280000   2.52580165
  0.91280000   1.96085880
  0.91280000   2.52579487
  0.91280000   1.96085690
  0.91280000   2.52578874
  0.91280000   1.96085517
  0.91280000   2.52578319
  0.91280000   1.96085357
  0.91280000   2.52577813
  0.91280000   1.96085210
  0.91280000   2.52577350
  0.91290000   2.52664875
  0.91290000   1.95959491
  0.91290000   2.52663668
  0.91290000   1.95958617
  0.91290000   2.52662298
  0.91290000   1.95958528
  0.91290000   2.52661247
  0.91290000   1.95958159
  0.91290000   2.52660268
  0.91290000   1.95957946
  0.91290000   2.52659426
  0.91290000   1.95957703
  0.91290000   2.52658666
  0.91290000   1.95957503
  0.91290000   2.52657989
  0.91290000   1.95957311
  0.91290000   2.52657377
  0.91290000   1.95957138
  0.91290000   2.52656822
  0.91290000   1.95956978
  0.91290000   2.52656317
  0.91290000   1.95956830
  0.91290000   2.52655855
  0.91300000   2.52742954
  0.91300000   1.95831634
  0.91300000   2.52741846
  0.91300000   1.95830565
  0.91300000   2.52740434
  0.91300000   1.95830561
  0.91300000   2.52739404
  0.91300000   1.95830153
  0.91300000   2.52738417
  0.91300000   1.95829957
  0.91300000   2.52737580
  0.91300000   1.95829705
  0.91300000   2.52736820
  0.91300000   1.95829508
  0.91300000   2.52736144
  0.91300000   1.95829314
  0.91300000   2.52735533
  0.91300000   1.95829142
  0.91300000   2.52734979
  0.91300000   1.95828981
  0.91300000   2.52734474
  0.91300000   1.95828833
  0.91300000   2.52734012
  0.91310000   2.52820678
  0.91310000   1.95704182
  0.91310000   2.52819687
  0.91310000   1.95702878
  0.91310000   2.52818223
  0.91310000   1.95702981
  0.91310000   2.52817219
  0.91310000   1.95702522
  0.91310000   2.52816222
  0.91310000   1.95702348
  0.91310000   2.52815392
  0.91310000   1.95702086
  0.91310000   2.52814630
  0.91310000   1.95701892
  0.91310000   2.52813957
  0.91310000   1.95701696
  0.91310000   2.52813345
  0.91310000   1.95701524
  0.91310000   2.52812792
  0.91310000   1.95701362
  0.91310000   2.52812288
  0.91310000   1.95701214
  0.91310000   2.52811827
  0.91320000   2.52898049
  0.91320000   1.95577131
  0.91320000   2.52897195
  0.91320000   1.95575551
  0.91320000   2.52895669
  0.91320000   1.95575782
  0.91320000   2.52894697
  0.91320000   1.95575262
  0.91320000   2.52893687
  0.91320000   1.95575115
  0.91320000   2.52892864
  0.91320000   1.95574839
  0.91320000   2.52892100
  0.91320000   1.95574652
  0.91320000   2.52891429
  0.91320000   1.95574452
  0.91320000   2.52890818
  0.91320000   1.95574281
  0.91320000   2.52890266
  0.91320000   1.95574119
  0.91320000   2.52889762
  0.91320000   1.95573971
  0.91320000   2.52889302
  0.91330000   2.52975071
  0.91330000   1.95450479
  0.91330000   2.52974376
  0.91330000   1.95448579
  0.91330000   2.52972776
  0.91330000   1.95448963
  0.91330000   2.52971841
  0.91330000   1.95448368
  0.91330000   2.52970815
  0.91330000   1.95448256
  0.91330000   2.52970002
  0.91330000   1.95447963
  0.91330000   2.52969235
  0.91330000   1.95447783
  0.91330000   2.52968567
  0.91330000   1.95447579
  0.91330000   2.52967955
  0.91330000   1.95447410
  0.91330000   2.52967405
  0.91330000   1.95447246
  0.91330000   2.52966901
  0.91330000   1.95447098
  0.91330000   2.52966442
  0.91340000   2.53051748
  0.91340000   1.95324221
  0.91340000   2.53051234
  0.91340000   1.95321957
  0.91340000   2.53049546
  0.91340000   1.95322521
  0.91340000   2.53048657
  0.91340000   1.95321836
  0.91340000   2.53047611
  0.91340000   1.95321767
  0.91340000   2.53046809
  0.91340000   1.95321452
  0.91340000   2.53046038
  0.91340000   1.95321282
  0.91340000   2.53045373
  0.91340000   1.95321073
  0.91340000   2.53044761
  0.91340000   1.95320905
  0.91340000   2.53044211
  0.91340000   1.95320740
  0.91340000   2.53043709
  0.91340000   1.95320593
  0.91340000   2.53043250
  0.91350000   2.53128083
  0.91350000   1.95198354
  0.91350000   2.53127771
  0.91350000   1.95195683
  0.91350000   2.53125983
  0.91350000   1.95196452
  0.91350000   2.53125147
  0.91350000   1.95195663
  0.91350000   2.53124076
  0.91350000   1.95195645
  0.91350000   2.53123288
  0.91350000   1.95195303
  0.91350000   2.53122512
  0.91350000   1.95195145
  0.91350000   2.53121851
  0.91350000   1.95194929
  0.91350000   2.53121238
  0.91350000   1.95194765
  0.91350000   2.53120690
  0.91350000   1.95194598
  0.91350000   2.53120187
  0.91350000   1.95194451
  0.91350000   2.53119730
  0.91360000   2.53204083
  0.91360000   1.95072870
  0.91360000   2.53203992
  0.91360000   1.95069753
  0.91360000   2.53202091
  0.91360000   1.95070753
  0.91360000   2.53201315
  0.91360000   1.95069843
  0.91360000   2.53200215
  0.91360000   1.95069886
  0.91360000   2.53199444
  0.91360000   1.95069513
  0.91360000   2.53198661
  0.91360000   1.95069370
  0.91360000   2.53198004
  0.91360000   1.95069146
  0.91360000   2.53197391
  0.91360000   1.95068985
  0.91360000   2.53196845
  0.91360000   1.95068816
  0.91360000   2.53196342
  0.91360000   1.95068669
  0.91360000   2.53195885
  0.91370000   2.53279752
  0.91370000   1.94947764
  0.91370000   2.53279899
  0.91370000   1.94944164
  0.91370000   2.53277874
  0.91370000   1.94945420
  0.91370000   2.53277166
  0.91370000   1.94944373
  0.91370000   2.53276033
  0.91370000   1.94944487
  0.91370000   2.53275280
  0.91370000   1.94944076
  0.91370000   2.53274488
  0.91370000   1.94943953
  0.91370000   2.53273838
  0.91370000   1.94943718
  0.91370000   2.53273222
  0.91370000   1.94943562
  0.91370000   2.53272678
  0.91370000   1.94943390
  0.91370000   2.53272176
  0.91370000   1.94943244
  0.91370000   2.53271719
  0.91380000   2.53355097
  0.91380000   1.94823024
  0.91380000   2.53355495
  0.91380000   1.94818915
  0.91380000   2.53353334
  0.91380000   1.94820450
  0.91380000   2.53352702
  0.91380000   1.94819251
  0.91380000   2.53351530
  0.91380000   1.94819445
  0.91380000   2.53350800
  0.91380000   1.94818990
  0.91380000   2.53349998
  0.91380000   1.94818889
  0.91380000   2.53349354
  0.91380000   1.94818642
  0.91380000   2.53348737
  0.91380000   1.94818492
  0.91380000   2.53348195
  0.91380000   1.94818316
  0.91380000   2.53347692
  0.91380000   1.94818173
  0.91380000   2.53347237
  0.91390000   2.53430126
  0.91390000   1.94698641
  0.91390000   2.53430781
  0.91390000   1.94694007
  0.91390000   2.53428478
  0.91390000   1.94695836
  0.91390000   2.53427927
  0.91390000   1.94694472
  0.91390000   2.53426712
  0.91390000   1.94694757
  0.91390000   2.53426008
  0.91390000   1.94694252
  0.91390000   2.53425193
  0.91390000   1.94694177
  0.91390000   2.53424558
  0.91390000   1.94693915
  0.91390000   2.53423936
  0.91390000   1.94693773
  0.91390000   2.53423398
  0.91390000   1.94693592
  0.91390000   2.53422894
  0.91390000   1.94693451
  0.91390000   2.53422440
  0.91400000   2.53504846
  0.91400000   1.94574598
  0.91400000   2.53505758
  0.91400000   1.94569443
  0.91400000   2.53503308
  0.91400000   1.94571573
  0.91400000   2.53502844
  0.91400000   1.94570036
  0.91400000   2.53501582
  0.91400000   1.94570417
  0.91400000   2.53500905
  0.91400000   1.94569857
  0.91400000   2.53500077
  0.91400000   1.94569812
  0.91400000   2.53499450
  0.91400000   1.94569534
  0.91400000   2.53498826
  0.91400000   1.94569400
  0.91400000   2.53498290
  0.91400000   1.94569214
  0.91400000   2.53497786
  0.91400000   1.94569075
  0.91400000   2.53497333
  0.91410000   2.53579269
  0.91410000   1.94450880
  0.91410000   2.53580426
  0.91410000   1.94445225
  0.91410000   2.53577831
  0.91410000   1.94447655
  0.91410000   2.53577455
  0.91410000   1.94445940
  0.91410000   2.53576144
  0.91410000   1.94446423
  0.91410000   2.53575497
  0.91410000   1.94445804
  0.91410000   2.53574653
  0.91410000   1.94445792
  0.91410000   2.53574037
  0.91410000   1.94445494
  0.91410000   2.53573408
  0.91410000   1.94445370
  0.91410000   2.53572875
  0.91410000   1.94445179
  0.91410000   2.53572371
  0.91410000   1.94445043
  0.91410000   2.53571919
  0.91420000   2.53653406
  0.91420000   1.94327465
  0.91420000   2.53654783
  0.91420000   1.94321361
  0.91420000   2.53652053
  0.91420000   1.94324072
  0.91420000   2.53651761
  0.91420000   1.94322184
  0.91420000   2.53650401
  0.91420000   1.94322770
  0.91420000   2.53649785
  0.91420000   1.94322089
  0.91420000   2.53648926
  0.91420000   1.94322112
  0.91420000   2.53648319
  0.91420000   1.94321794
  0.91420000   2.53647685
  0.91420000   1.94321682
  0.91420000   2.53647157
  0.91420000   1.94321483
  0.91420000   2.53646651
  0.91420000   1.94321350
  0.91420000   2.53646201
  0.91430000   2.53727271
  0.91430000   1.94204330
  0.91430000   2.53728827
  0.91430000   1.94197859
  0.91430000   2.53725979
  0.91430000   1.94200814
  0.91430000   2.53725765
  0.91430000   1.94198768
  0.91430000   2.53724359
  0.91430000   1.94199452
  0.91430000   2.53723773
  0.91430000   1.94198711
  0.91430000   2.53722896
  0.91430000   1.94198770
  0.91430000   2.53722302
  0.91430000   1.94198429
  0.91430000   2.53721662
  0.91430000   1.94198329
  0.91430000   2.53721138
  0.91430000   1.94198124
  0.91430000   2.53720631
  0.91430000   1.94197995
  0.91430000   2.53720182
  0.91440000   2.53800879
  0.91440000   1.94081445
  0.91440000   2.53802552
  0.91440000   1.94074732
  0.91440000   2.53799617
  0.91440000   1.94077870
  0.91440000   2.53799467
  0.91440000   1.94075695
  0.91440000   2.53798021
  0.91440000   1.94076463
  0.91440000   2.53797462
  0.91440000   1.94075668
  0.91440000   2.53796570
  0.91440000   1.94075760
  0.91440000   2.53795986
  0.91440000   1.94075399
  0.91440000   2.53795342
  0.91440000   1.94075311
  0.91440000   2.53794822
  0.91440000   1.94075097
  0.91440000   2.53794313
  0.91440000   1.94074973
  0.91440000   2.53793867
  0.91450000   2.53874248
  0.91450000   1.93958779
  0.91450000   2.53875954
  0.91450000   1.93951995
  0.91450000   2.53872977
  0.91450000   1.93955225
  0.91450000   2.53872867
  0.91450000   1.93952969
  0.91450000   2.53871392
  0.91450000   1.93953797
  0.91450000   2.53870855
  0.91450000   1.93952959
  0.91450000   2.53869951
  0.91450000   1.93953078
  0.91450000   2.53869376
  0.91450000   1.93952699
  0.91450000   2.53868727
  0.91450000   1.93952622
  0.91450000   2.53868211
  0.91450000   1.93952401
  0.91450000   2.53867701
  0.91450000   1.93952281
  0.91450000   2.53867256
  0.91460000   2.53947398
  0.91460000   1.93836292
  0.91460000   2.53949024
  0.91460000   1.93829668
  0.91460000   2.53946068
  0.91460000   1.93832861
  0.91460000   2.53945963
  0.91460000   1.93830594
  0.91460000   2.53944479
  0.91460000   1.93831444
  0.91460000   2.53943953
  0.91460000   1.93830584
  0.91460000   2.53943042
  0.91460000   1.93830721
  0.91460000   2.53942474
  0.91460000   1.93830328
  0.91460000   2.53941822
  0.91460000   1.93830260
  0.91460000   2.53941309
  0.91460000   1.93830033
  0.91460000   2.53940798
  0.91460000   1.93829916
  0.91460000   2.53940355
  0.91470000   2.54020351
  0.91470000   1.93713941
  0.91470000   2.54021753
  0.91470000   1.93707774
  0.91470000   2.54018901
  0.91470000   1.93710758
  0.91470000   2.54018754
  0.91470000   1.93708580
  0.91470000   2.54017288
  0.91470000   1.93709395
  0.91470000   2.54016758
  0.91470000   1.93708545
  0.91470000   2.54015848
  0.91470000   1.93708681
  0.91470000   2.54015282
  0.91470000   1.93708286
  0.91470000   2.54014628
  0.91470000   1.93708220
  0.91470000   2.54014118
  0.91470000   1.93707991
  0.91470000   2.54013606
  0.91470000   1.93707875
  0.91470000   2.54013164
  0.91480000   2.54093133
  0.91480000   1.93591678
  0.91480000   2.54094128
  0.91480000   1.93586342
  0.91480000   2.54091490
  0.91480000   1.93588893
  0.91480000   2.54091234
  0.91480000   1.93586937
  0.91480000   2.54089826
  0.91480000   1.93587639
  0.91480000   2.54089269
  0.91480000   1.93586845
  0.91480000   2.54088373
  0.91480000   1.93586953
  0.91480000   2.54087802
  0.91480000   1.93586570
  0.91480000   2.54087152
  0.91480000   1.93586499
  0.91480000   2.54086641
  0.91480000   1.93586271
  0.91480000   2.54086130
  0.91480000   1.93586155
  0.91480000   2.54085689
  0.91490000   2.54165772
  0.91490000   1.93469448
  0.91490000   2.54166134
  0.91490000   1.93465406
  0.91490000   2.54163850
  0.91490000   1.93467238
  0.91490000   2.54163401
  0.91490000   1.93465679
  0.91490000   2.54162101
  0.91490000   1.93466161
  0.91490000   2.54161486
  0.91490000   1.93465487
  0.91490000   2.54160623
  0.91490000   1.93465528
  0.91490000   2.54160035
  0.91490000   1.93465182
  0.91490000   2.54159396
  0.91490000   1.93465090
  0.91490000   2.54158880
  0.91490000   1.93464873
  0.91490000   2.54158373
  0.91490000   1.93464751
  0.91490000   2.54157931
  0.91500000   2.54238299
  0.91500000   1.93347189
  0.91500000   2.54237754
  0.91500000   1.93345004
  0.91500000   2.54235998
  0.91500000   1.93345760
  0.91500000   2.54235245
  0.91500000   1.93344823
  0.91500000   2.54234123
  0.91500000   1.93344944
  0.91500000   2.54233407
  0.91500000   1.93344478
  0.91500000   2.54232604
  0.91500000   1.93344399
  0.91500000   2.54231983
  0.91500000   1.93344122
  0.91500000   2.54231364
  0.91500000   1.93343990
  0.91500000   2.54230837
  0.91500000   1.93343796
  0.91500000   2.54230337
  0.91500000   1.93343660
  0.91500000   2.54229892
  0.91510000   2.54310746
  0.91510000   1.93224835
  0.91510000   2.54308969
  0.91510000   1.93225182
  0.91510000   2.54307952
  0.91510000   1.93224422
  0.91510000   2.54306760
  0.91510000   1.93224391
  0.91510000   2.54305902
  0.91510000   1.93223970
  0.91510000   2.54305030
  0.91510000   1.93223827
  0.91510000   2.54304322
  0.91510000   1.93223554
  0.91510000   2.54303645
  0.91510000   1.93223392
  0.91510000   2.54303061
  0.91510000   1.93223191
  0.91510000   2.54302515
  0.91510000   1.93223038
  0.91510000   2.54302027
  0.91510000   1.93222878
  0.91510000   2.54301575
  0.91520000   2.54383153
  0.91520000   1.93102312
  0.91520000   2.54379755
  0.91520000   1.93105990
  0.91520000   2.54379736
  0.91520000   1.93103183
  0.91520000   2.54377933
  0.91520000   1.93104408
  0.91520000   2.54377452
  0.91520000   1.93103215
  0.91520000   2.54376350
  0.91520000   1.93103546
  0.91520000   2.54375785
  0.91520000   1.93102981
  0.91520000   2.54375022
  0.91520000   1.93102998
  0.91520000   2.54374491
  0.91520000   1.93102687
  0.91520000   2.54373914
  0.91520000   1.93102601
  0.91520000   2.54373446
  0.91520000   1.93102399
  0.91520000   2.54372983
  0.91530000   2.54455557
  0.91530000   1.92979539
  0.91530000   2.54450085
  0.91530000   1.92987486
  0.91530000   2.54451373
  0.91530000   1.92981994
  0.91530000   2.54448751
  0.91530000   1.92984905
  0.91530000   2.54448787
  0.91530000   1.92982652
  0.91530000   2.54447362
  0.91530000   1.92983648
  0.91530000   2.54447001
  0.91530000   1.92982665
  0.91530000   2.54446111
  0.91530000   1.92982943
  0.91530000   2.54445662
  0.91530000   1.92982468
  0.91530000   2.54445034
  0.91530000   1.92982485
  0.91530000   2.54444599
  0.91530000   1.92982218
  0.91530000   2.54444117
  0.91540000   2.54528002
  0.91540000   1.92856430
  0.91540000   2.54519931
  0.91540000   1.92869734
  0.91540000   2.54522891
  0.91540000   1.92860801
  0.91540000   2.54519198
  0.91540000   1.92865918
  0.91540000   2.54519923
  0.91540000   1.92862250
  0.91540000   2.54518059
  0.91540000   1.92864152
  0.91540000   2.54517980
  0.91540000   1.92862589
  0.91540000   2.54516912
  0.91540000   1.92863238
  0.91540000   2.54516578
  0.91540000   1.92862525
  0.91540000   2.54515877
  0.91540000   1.92862694
  0.91540000   2.54515490
  0.91540000   1.92862330
  0.91540000   2.54514978
  0.91550000   2.54600534
  0.91550000   1.92732892
  0.91550000   2.54589259
  0.91550000   1.92752806
  0.91550000   2.54594320
  0.91550000   1.92739543
  0.91550000   2.54589257
  0.91550000   1.92747490
  0.91550000   2.54590879
  0.91550000   1.92741972
  0.91550000   2.54588431
  0.91550000   1.92745081
  0.91550000   2.54588735
  0.91550000   1.92742730
  0.91550000   2.54587418
  0.91550000   1.92743892
  0.91550000   2.54587247
  0.91550000   1.92742845
  0.91550000   2.54586442
  0.91550000   1.92743231
  0.91550000   2.54586124
  0.91550000   1.92742726
  0.91550000   2.54585567
  0.91560000   2.54673203
  0.91560000   1.92608824
  0.91560000   2.54658034
  0.91560000   1.92636781
  0.91560000   2.54665695
  0.91560000   1.92618152
  0.91560000   2.54658904
  0.91560000   1.92629669
  0.91560000   2.54661677
  0.91560000   1.92621777
  0.91560000   2.54658466
  0.91560000   1.92626461
  0.91560000   2.54659278
  0.91560000   1.92623065
  0.91560000   2.54657626
  0.91560000   1.92624919
  0.91560000   2.54657678
  0.91560000   1.92623413
  0.91560000   2.54656727
  0.91560000   1.92624102
  0.91560000   2.54656506
  0.91560000   1.92623397
  0.91560000   2.54655886
  0.91570000   2.54746058
  0.91570000   1.92484121
  0.91570000   2.54726215
  0.91570000   1.92521746
  0.91570000   2.54737052
  0.91570000   1.92496554
  0.91570000   2.54728114
  0.91570000   1.92512511
  0.91570000   2.54732341
  0.91570000   1.92501616
  0.91570000   2.54728151
  0.91570000   1.92508326
  0.91570000   2.54729624
  0.91570000   1.92503564
  0.91570000   2.54727529
  0.91570000   1.92506337
  0.91570000   2.54727880
  0.91570000   1.92504213
  0.91570000   2.54726728
  0.91570000   1.92505317
  0.91570000   2.54726643
  0.91570000   1.92504333
  0.91570000   2.54725933
  0.91580000   2.54819156
  0.91580000   1.92358671
  0.91580000   2.54793759
  0.91580000   1.92407794
  0.91580000   2.54808432
  0.91580000   1.92374666
  0.91580000   2.54796858
  0.91580000   1.92396079
  0.91580000   2.54802898
  0.91580000   1.92381435
  0.91580000   2.54797467
  0.91580000   1.92390714
  0.91580000   2.54799792
  0.91580000   1.92384193
  0.91580000   2.54797116
  0.91580000   1.92388168
  0.91580000   2.54797865
  0.91580000   1.92385223
  0.91580000   2.54796444
  0.91580000   1.92386886
  0.91580000   2.54796543
  0.91580000   1.92385521
  0.91580000   2.54795709
  0.91590000   2.54892553
  0.91590000   1.92232356
  0.91590000   2.54860618
  0.91590000   1.92295027
  0.91590000   2.54879881
  0.91590000   1.92252397
  0.91590000   2.54865104
  0.91590000   1.92280445
  0.91590000   2.54873381
  0.91590000   1.92261171
  0.91590000   2.54866396
  0.91590000   1.92273671
  0.91590000   2.54869802
  0.91590000   1.92264911
  0.91590000   2.54866377
  0.91590000   1.92270438
  0.91590000   2.54867646
  0.91590000   1.92266418
  0.91590000   2.54865866
  0.91590000   1.92268824
  0.91590000   2.54866214
  0.91590000   1.92266946
  0.91590000   2.54865209
  0.91600000   2.54966308
  0.91600000   1.92105054
  0.91600000   2.54926742
  0.91600000   1.92183557
  0.91600000   2.54951445
  0.91600000   1.92129647
  0.91600000   2.54932814
  0.91600000   1.92165690
  0.91600000   2.54943824
  0.91600000   1.92140753
  0.91600000   2.54934911
  0.91600000   1.92157250
  0.91600000   2.54939678
  0.91600000   1.92145672
  0.91600000   2.54935297
  0.91600000   1.92153181
  0.91600000   2.54937238
  0.91600000   1.92147769
  0.91600000   2.54934989
  0.91600000   1.92151150
  0.91600000   2.54935667
  0.91600000   1.92148589
  0.91600000   2.54934432
  0.91610000   2.55040484
  0.91610000   1.91976635
  0.91610000   2.54992076
  0.91610000   1.92073500
  0.91610000   2.55023179
  0.91610000   1.92006309
  0.91610000   2.54999947
  0.91610000   1.92051903
  0.91610000   2.55014265
  0.91610000   1.92020102
  0.91610000   2.55002985
  0.91610000   1.92041512
  0.91610000   2.55009447
  0.91610000   1.92026421
  0.91610000   2.55003859
  0.91610000   1.92036435
  0.91610000   2.55006661
  0.91610000   1.92029239
  0.91610000   2.55003801
  0.91610000   1.92033888
  0.91610000   2.55004914
  0.91610000   1.92030427
  0.91610000   2.55003372
  0.91620000   2.55115143
  0.91620000   1.91846967
  0.91620000   2.55056562
  0.91620000   1.91964983
  0.91620000   2.55095138
  0.91620000   1.91882266
  0.91620000   2.55066457
  0.91620000   1.91939184
  0.91620000   2.55084750
  0.91620000   1.91899129
  0.91620000   2.55070587
  0.91620000   1.91926529
  0.91620000   2.55079140
  0.91620000   1.91907096
  0.91620000   2.55072041
  0.91620000   1.91920248
  0.91620000   2.55075936
  0.91620000   1.91910787
  0.91620000   2.55072290
  0.91620000   1.91917067
  0.91620000   2.55073968
  0.91620000   1.91912432
  0.91620000   2.55072021
  0.91630000   2.55190352
  0.91630000   1.91715913
  0.91630000   2.55120137
  0.91630000   1.91858141
  0.91630000   2.55167383
  0.91630000   1.91757392
  0.91630000   2.55132293
  0.91630000   1.91827642
  0.91630000   2.55155326
  0.91630000   1.91777735
  0.91630000   2.55137677
  0.91630000   1.91812383
  0.91630000   2.55148793
  0.91630000   1.91787624
  0.91630000   2.55139819
  0.91630000   1.91804675
  0.91630000   2.55145086
  0.91630000   1.91792363
  0.91630000   2.55140440
  0.91630000   1.91800723
  0.91630000   2.55142849
  0.91630000   1.91794573
  0.91630000   2.55140371
  0.91640000   2.55266177
  0.91640000   1.91583333
  0.91640000   2.55182735
  0.91640000   1.91753116
  0.91640000   2.55239980
  0.91640000   1.91631553
  0.91640000   2.55197398
  0.91640000   1.91717401
  0.91640000   2.55226047
  0.91640000   1.91655808
  0.91640000   2.55204214
  0.91640000   1.91699164
  0.91640000   2.55218447
  0.91640000   1.91667923
  0.91640000   2.55207162
  0.91640000   1.91689783
  0.91640000   2.55214143
  0.91640000   1.91673908
  0.91640000   2.55208231
  0.91640000   1.91684900
  0.91640000   2.55211574
  0.91640000   1.91676808
  0.91640000   2.55208410
  0.91650000   2.55342687
  0.91650000   1.91449084
  0.91650000   2.55244287
  0.91650000   1.91650057
  0.91650000   2.55312997
  0.91650000   1.91504604
  0.91650000   2.55261711
  0.91650000   1.91608590
  0.91650000   2.55296972
  0.91650000   1.91533228
  0.91650000   2.55270149
  0.91650000   1.91586979
  0.91650000   2.55288148
  0.91650000   1.91547899
  0.91650000   2.55274035
  0.91650000   1.91575647
  0.91650000   2.55283138
  0.91650000   1.91555354
  0.91650000   2.55275639
  0.91650000   1.91569651
  0.91650000   2.55280170
  0.91650000   1.91559090
  0.91650000   2.55276121
  0.91660000   2.55419951
  0.91660000   1.91313019
  0.91660000   2.55304721
  0.91660000   1.91549122
  0.91660000   2.55386507
  0.91660000   1.91376394
  0.91660000   2.55325166
  0.91660000   1.91501357
  0.91660000   2.55368165
  0.91660000   1.91409860
  0.91660000   2.55335427
  0.91660000   1.91475944
  0.91660000   2.55357946
  0.91660000   1.91427444
  0.91660000   2.55340397
  0.91660000   1.91462356
  0.91660000   2.55352112
  0.91660000   1.91436623
  0.91660000   2.55342636
  0.91660000   1.91455039
  0.91660000   2.55348663
  0.91660000   1.91441363
  0.91660000   2.55343487
  0.91670000   2.55498038
  0.91670000   1.91174991
  0.91670000   2.55363959
  0.91670000   1.91450476
  0.91670000   2.55460588
  0.91670000   1.91246760
  0.91670000   2.55387688
  0.91670000   1.91395856
  0.91670000   2.55439698
  0.91670000   1.91285557
  0.91670000   2.55399987
  0.91670000   1.91366192
  0.91670000   2.55427902
  0.91670000   1.91306440
  0.91670000   2.55406200
  0.91670000   1.91350013
  0.91670000   2.55421110
  0.91670000   1.91317620
  0.91670000   2.55409187
  0.91670000   1.91341140
  0.91670000   2.55417087
  0.91670000   1.91323558
  0.91670000   2.55410481
  0.91680000   2.55577018
  0.91680000   1.91034853
  0.91680000   2.55421923
  0.91680000   1.91354291
  0.91680000   2.55535320
  0.91680000   1.91115533
  0.91680000   2.55449199
  0.91680000   1.91292258
  0.91680000   2.55511648
  0.91680000   1.91160158
  0.91680000   2.55463761
  0.91680000   1.91257870
  0.91680000   2.55498079
  0.91680000   1.91184748
  0.91680000   2.55471389
  0.91680000   1.91238737
  0.91680000   2.55490183
  0.91680000   1.91198239
  0.91680000   2.55475249
  0.91680000   1.91228043
  0.91680000   2.55485483
  0.91680000   1.91205595
  0.91680000   2.55477076
  0.91690000   2.55656959
  0.91690000   1.90892459
  0.91690000   2.55478529
  0.91690000   1.91260745
  0.91690000   2.55610788
  0.91690000   1.90982533
  0.91690000   2.55509614
  0.91690000   1.91190746
  0.91690000   2.55584097
  0.91690000   1.91033490
  0.91690000   2.55526672
  0.91690000   1.91151142
  0.91690000   2.55568553
  0.91690000   1.91062219
  0.91690000   2.55535903
  0.91690000   1.91128661
  0.91690000   2.55559391
  0.91690000   1.91078357
  0.91690000   2.55540775
  0.91690000   1.91115854
  0.91690000   2.55553896
  0.91690000   1.91087378
  0.91690000   2.55543234
  0.91700000   2.55737930
  0.91700000   1.90747661
  0.91700000   2.55533695
  0.91700000   1.91170020
  0.91700000   2.55687081
  0.91700000   1.90847577
  0.91700000   2.55568844
  0.91700000   1.91091513
  0.91700000   2.55657135
  0.91700000   1.90905364
  0.91700000   2.55588635
  0.91700000   1.91046187
  0.91700000   2.55639402
  0.91700000   1.90938683
  0.91700000   2.55599668
  0.91700000   1.91019941
  0.91700000   2.55628803
  0.91700000   1.90957833
  0.91700000   2.55605708
  0.91700000   1.91004695
  0.91700000   2.55622380
  0.91700000   1.90968797
  0.91700000   2.55608912
  0.91710000   2.55819997
  0.91710000   1.90600320
  0.91710000   2.55587332
  0.91710000   1.91082305
  0.91710000   2.55764287
  0.91710000   1.90710472
  0.91710000   2.55626790
  0.91710000   1.90994768
  0.91710000   2.55730859
  0.91710000   1.90775578
  0.91710000   2.55649560
  0.91710000   1.90943206
  0.91710000   2.55710717
  0.91710000   1.90813952
  0.91710000   2.55662604
  0.91710000   1.90912748
  0.91710000   2.55698496
  0.91710000   1.90836506
  0.91710000   2.55669980
  0.91710000   1.90894709
  0.91710000   2.55690998
  0.91710000   1.90849721
  0.91710000   2.55674058
  0.91720000   2.55903224
  0.91720000   1.90450296
  0.91720000   2.55639353
  0.91720000   1.90997792
  0.91720000   2.55842501
  0.91720000   1.90571020
  0.91720000   2.55683350
  0.91720000   1.90900732
  0.91720000   2.55805370
  0.91720000   1.90643917
  0.91720000   2.55709343
  0.91720000   1.90842414
  0.91720000   2.55782597
  0.91720000   1.90687819
  0.91720000   2.55724620
  0.91720000   1.90807279
  0.91720000   2.55768555
  0.91720000   1.90714193
  0.91720000   2.55733514
  0.91720000   1.90786061
  0.91720000   2.55759825
  0.91720000   1.90729996
  0.91720000   2.55738610
  0.91730000   2.55987671
  0.91730000   1.90297458
  0.91730000   2.55689668
  0.91730000   1.90916674
  0.91730000   2.55921816
  0.91730000   1.90429021
  0.91730000   2.55738418
  0.91730000   1.90809637
  0.91730000   2.55880778
  0.91730000   1.90510150
  0.91730000   2.55767875
  0.91730000   1.90744050
  0.91730000   2.55855150
  0.91730000   1.90560057
  0.91730000   2.55785614
  0.91730000   1.90703754
  0.91730000   2.55839082
  0.91730000   1.90590689
  0.91730000   2.55796222
  0.91730000   1.90678942
  0.91730000   2.55828943
  0.91730000   1.90609448
  0.91730000   2.55802495
  0.91740000   2.56073396
  0.91740000   1.90141683
  0.91740000   2.55738189
  0.91740000   1.90839145
  0.91740000   2.56002329
  0.91740000   1.90284271
  0.91740000   2.55791879
  0.91740000   1.90721726
  0.91740000   2.55957197
  0.91740000   1.90374035
  0.91740000   2.55825036
  0.91740000   1.90648370
  0.91740000   2.55928493
  0.91740000   1.90430418
  0.91740000   2.55845470
  0.91740000   1.90602417
  0.91740000   2.55910185
  0.91740000   1.90465762
  0.91740000   2.55858002
  0.91740000   1.90573570
  0.91740000   2.55898450
  0.91740000   1.90487872
  0.91740000   2.55865625
  0.91750000   2.56160449
  0.91750000   1.89982859
  0.91750000   2.55784828
  0.91750000   1.90765399
  0.91750000   2.56084134
  0.91750000   1.90136567
  0.91750000   2.55843616
  0.91750000   1.90637252
  0.91750000   2.56034746
  0.91750000   1.90235319
  0.91750000   2.55880697
  0.91750000   1.90555649
  0.91750000   2.56002754
  0.91750000   1.90298634
  0.91750000   2.55904063
  0.91750000   1.90503538
  0.91750000   2.55981987
  0.91750000   1.90339153
  0.91750000   2.55918737
  0.91750000   1.90470193
  0.91750000   2.55968459
  0.91750000   1.90365036
  0.91750000   2.55927899
  0.91760000   2.56248876
  0.91760000   1.89820884
  0.91760000   2.55829498
  0.91760000   1.90695623
  0.91760000   2.56167324
  0.91760000   1.89985707
  0.91760000   2.55893509
  0.91760000   1.90556479
  0.91760000   2.56113550
  0.91760000   1.90093738
  0.91760000   2.55934721
  0.91760000   1.90466184
  0.91760000   2.56078069
  0.91760000   1.90164415
  0.91760000   2.55961252
  0.91760000   1.90407417
  0.91760000   2.56054625
  0.91760000   1.90210574
  0.91760000   2.55978296
  0.91760000   1.90369092
  0.91760000   2.56039094
  0.91760000   1.90240674
  0.91760000   2.55989201
  0.91770000   2.56338715
  0.91770000   1.89655674
  0.91770000   2.55872116
  0.91770000   1.90629999
  0.91770000   2.56251992
  0.91770000   1.89831494
  0.91770000   2.55941432
  0.91770000   1.90479673
  0.91770000   2.56193735
  0.91770000   1.89949018
  0.91770000   2.55986960
  0.91770000   1.90380289
  0.91770000   2.56154584
  0.91770000   1.90027450
  0.91770000   2.56016885
  0.91770000   1.90314381
  0.91770000   2.56128248
  0.91770000   1.90079711
  0.91770000   2.56036531
  0.91770000   1.90270584
  0.91770000   2.56110500
  0.91770000   1.90114483
  0.91770000   2.56049394
  0.91780000   2.56429995
  0.91780000   1.89487161
  0.91780000   2.55912604
  0.91780000   1.90568701
  0.91780000   2.56338223
  0.91780000   1.89673740
  0.91780000   2.55987261
  0.91780000   1.90407106
  0.91780000   2.56275432
  0.91780000   1.89800884
  0.91780000   2.56037262
  0.91780000   1.90298295
  0.91780000   2.56232455
  0.91780000   1.89887411
  0.91780000   2.56070795
  0.91780000   1.90224787
  0.91780000   2.56203021
  0.91780000   1.89946214
  0.91780000   2.56093276
  0.91780000   1.90175023
  0.91780000   2.56182837
  0.91780000   1.89986124
  0.91780000   2.56108322
  0.91790000   2.56522735
  0.91790000   1.89315301
  0.91790000   2.55950892
  0.91790000   1.90511886
  0.91790000   2.56426100
  0.91790000   1.89512269
  0.91790000   2.56030870
  0.91790000   1.90339051
  0.91790000   2.56358771
  0.91790000   1.89649055
  0.91790000   2.56085463
  0.91790000   1.90220552
  0.91790000   2.56311842
  0.91790000   1.89743953
  0.91790000   2.56122802
  0.91790000   1.90139022
  0.91790000   2.56279120
  0.91790000   1.89809708
  0.91790000   2.56148347
  0.91790000   1.90082803
  0.91790000   2.56256285
  0.91790000   1.89855217
  0.91790000   2.56165806
  0.91800000   2.56616943
  0.91800000   1.89140073
  0.91800000   2.55986915
  0.91800000   1.90459695
  0.91800000   2.56515694
  0.91800000   1.89346919
  0.91800000   2.56072136
  0.91800000   1.90275776
  0.91800000   2.56443879
  0.91800000   1.89493255
  0.91800000   2.56131397
  0.91800000   1.90147417
  0.91800000   2.56392916
  0.91800000   1.89596714
  0.91800000   2.56172712
  0.91800000   1.90057498
  0.91800000   2.56356738
  0.91800000   1.89669785
  0.91800000   2.56201539
  0.91800000   1.89994360
  0.91800000   2.56331042
  0.91800000   1.89721340
  0.91800000   2.56221646
  0.91810000   2.56712611
  0.91810000   1.88961485
  0.91810000   2.56020624
  0.91810000   1.90412245
  0.91810000   2.56607069
  0.91810000   1.89177552
  0.91810000   2.56110938
  0.91810000   1.90217541
  0.91810000   2.56530884
  0.91810000   1.89333213
  0.91810000   2.56174893
  0.91810000   1.90079261
  0.91810000   2.56475847
  0.91810000   1.89445326
  0.91810000   2.56220320
  0.91810000   1.89980658
  0.91810000   2.56436077
  0.91810000   1.89526011
  0.91810000   2.56252630
  0.91810000   1.89910171
  0.91810000   2.56407329
  0.91810000   1.89584026
  0.91810000   2.56275614
  0.91820000   2.56809718
  0.91820000   1.88779576
  0.91820000   2.56051978
  0.91820000   1.90369627
  0.91820000   2.56700276
  0.91820000   1.89004054
  0.91820000   2.56147165
  0.91820000   1.90164594
  0.91820000   2.56619901
  0.91820000   1.89168672
  0.91820000   2.56215778
  0.91820000   1.90016456
  0.91820000   2.56560812
  0.91820000   1.89289413
  0.91820000   2.56265410
  0.91820000   1.89908965
  0.91820000   2.56517354
  0.91820000   1.89377927
  0.91820000   2.56301376
  0.91820000   1.89830756
  0.91820000   2.56485383
  0.91820000   1.89442769
  0.91820000   2.56327456
  0.91830000   2.56908224
  0.91830000   1.88594426
  0.91830000   2.56080956
  0.91830000   1.90331896
  0.91830000   2.56795349
  0.91830000   1.88826344
  0.91830000   2.56180713
  0.91830000   1.90117159
  0.91830000   2.56711042
  0.91830000   1.88999393
  0.91830000   2.56253880
  0.91830000   1.89959376
  0.91830000   2.56647984
  0.91830000   1.89128599
  0.91830000   2.56307757
  0.91830000   1.89842904
  0.91830000   2.56600791
  0.91830000   1.89225053
  0.91830000   2.56347517
  0.91830000   1.89756674
  0.91830000   2.56565462
  0.91830000   1.89297019
  0.91830000   2.56376890
  0.91840000   2.57008072
  0.91840000   1.88406152
  0.91840000   2.56107556
  0.91840000   1.90299066
  0.91840000   2.56892305
  0.91840000   1.88644377
  0.91840000   2.56211493
  0.91840000   1.90075436
  0.91840000   2.56804403
  0.91840000   1.88825163
  0.91840000   2.56289031
  0.91840000   1.89908382
  0.91840000   2.56737532
  0.91840000   1.88962520
  0.91840000   2.56347129
  0.91840000   1.89782972
  0.91840000   2.56686618
  0.91840000   1.89066897
  0.91840000   2.56390774
  0.91840000   1.89688523
  0.91840000   2.56647841
  0.91840000   1.89146191
  0.91840000   2.56423608
  0.91850000   2.57109179
  0.91850000   1.88214922
  0.91850000   2.56131799
  0.91850000   1.90271101
  0.91850000   2.56991141
  0.91850000   1.88458157
  0.91850000   2.56239434
  0.91850000   1.90039585
  0.91850000   2.56900061
  0.91850000   1.88645807
  0.91850000   2.56321073
  0.91850000   1.89863821
  0.91850000   2.56829616
  0.91850000   1.88790825
  0.91850000   2.56383292
  0.91850000   1.89729673
  0.91850000   2.56775067
  0.91850000   1.88902960
  0.91850000   2.56430853
  0.91850000   1.89626931
  0.91850000   2.56732806
  0.91850000   1.88989667
  0.91850000   2.56467273
  0.91860000   2.57211442
  0.91860000   1.88020953
  0.91860000   2.56153734
  0.91860000   1.90247906
  0.91860000   2.57091826
  0.91860000   1.88267736
  0.91860000   2.56264486
  0.91860000   1.90009721
  0.91860000   2.56998076
  0.91860000   1.88461193
  0.91860000   2.56349860
  0.91860000   1.89826010
  0.91860000   2.56924383
  0.91860000   1.88613197
  0.91860000   2.56416015
  0.91860000   1.89683507
  0.91860000   2.56866366
  0.91860000   1.88732750
  0.91860000   2.56467451
  0.91860000   1.89572552
  0.91860000   2.56820656
  0.91860000   1.88826808
  0.91860000   2.56507525
  0.91870000   2.57314727
  0.91870000   1.87824521
  0.91870000   2.56173442
  0.91870000   1.90229321
  0.91870000   2.57194303
  0.91870000   1.88073230
  0.91870000   2.56286627
  0.91870000   1.89985900
  0.91870000   2.57098479
  0.91870000   1.88271245
  0.91870000   2.56375266
  0.91870000   1.89795224
  0.91870000   2.57021958
  0.91870000   1.88429356
  0.91870000   2.56445075
  0.91870000   1.89644957
  0.91870000   2.56960733
  0.91870000   1.88555792
  0.91870000   2.56500256
  0.91870000   1.89526053
  0.91870000   2.56911694
  0.91870000   1.88656962
  0.91870000   2.56543982
  0.91880000   2.57418873
  0.91880000   1.87625970
  0.91880000   2.56191041
  0.91880000   1.90215104
  0.91880000   2.57298483
  0.91880000   1.87874825
  0.91880000   2.56305870
  0.91880000   1.89968107
  0.91880000   2.57201268
  0.91880000   1.88075954
  0.91880000   2.56397194
  0.91880000   1.89771684
  0.91880000   2.57122442
  0.91880000   1.88239080
  0.91880000   2.56470262
  0.91880000   1.89614476
  0.91880000   2.57058370
  0.91880000   1.88371645
  0.91880000   2.56528960
  0.91880000   1.89488101
  0.91880000   2.57006217
  0.91880000   1.88479484
  0.91880000   2.56576244
  0.91890000   2.57523682
  0.91890000   1.87425715
  0.91890000   2.56206692
  0.91890000   1.90204923
  0.91890000   2.57404235
  0.91890000   1.87672784
  0.91890000   2.56322268
  0.91890000   1.89956238
  0.91890000   2.57306406
  0.91890000   1.87875391
  0.91890000   2.56415579
  0.91890000   1.89755537
  0.91890000   2.57225900
  0.91890000   1.88042217
  0.91890000   2.56491392
  0.91890000   1.89592467
  0.91890000   2.57159454
  0.91890000   1.88179922
  0.91890000   2.56553261
  0.91890000   1.89459344
  0.91890000   2.57104512
  0.91890000   1.88293754
  0.91890000   2.56603905
  0.91900000   2.57628920
  0.91900000   1.87224252
  0.91900000   2.56220608
  0.91900000   1.90198338
  0.91900000   2.57511392
  0.91900000   1.87467462
  0.91900000   2.56335923
  0.91900000   1.89950088
  0.91900000   2.57413810
  0.91900000   1.87669721
  0.91900000   2.56430399
  0.91900000   1.89746840
  0.91900000   2.57332355
  0.91900000   1.87838706
  0.91900000   2.56508316
  0.91900000   1.89579259
  0.91900000   2.57264124
  0.91900000   1.87980312
  0.91900000   2.56572879
  0.91900000   1.89440390
  0.91900000   2.57206841
  0.91900000   1.88099201
  0.91900000   2.56626559
  0.91910000   2.57734311
  0.91910000   1.87022170
  0.91910000   2.56233058
  0.91910000   1.90194788
  0.91910000   2.57619736
  0.91910000   1.87259318
  0.91910000   2.56346996
  0.91910000   1.89949328
  0.91910000   2.57523347
  0.91910000   1.87459221
  0.91910000   2.56441689
  0.91910000   1.89745531
  0.91910000   2.57441777
  0.91910000   1.87628595
  0.91910000   2.56520929
  0.91910000   1.89575086
  0.91910000   2.57372472
  0.91910000   1.87772603
  0.91910000   2.56587568
  0.91910000   1.89431774
  0.91910000   2.57313427
  0.91910000   1.87895331
  0.91910000   2.56643817
  0.91920000   2.57839530
  0.91920000   1.86820160
  0.91920000   2.56244377
  0.91920000   1.90193571
  0.91920000   2.57728994
  0.91920000   1.87048924
  0.91920000   2.56355716
  0.91920000   1.89953482
  0.91920000   2.57634822
  0.91920000   1.87244292
  0.91920000   2.56449551
  0.91920000   1.89751408
  0.91920000   2.57554076
  0.91920000   1.87412066
  0.91920000   2.56529188
  0.91920000   1.89580051
  0.91920000   2.57484530
  0.91920000   1.87556711
  0.91920000   2.56597129
  0.91920000   1.89433929
  0.91920000   2.57424440
  0.91920000   1.87681765
  0.91920000   2.56655321
  0.91930000   2.57944200
  0.91930000   1.86619033
  0.91930000   2.56254978
  0.91930000   1.90193819
  0.91930000   2.57838835
  0.91930000   1.86836989
  0.91930000   2.56362392
  0.91930000   1.89961905
  0.91930000   2.57747975
  0.91930000   1.87025483
  0.91930000   2.56454167
  0.91930000   1.89764096
  0.91930000   2.57669087
  0.91930000   1.87189455
  0.91930000   2.56533129
  0.91930000   1.89594094
  0.91930000   2.57600255
  0.91930000   1.87332713
  0.91930000   2.56601434
  0.91930000   1.89447144
  0.91930000   2.57539978
  0.91930000   1.87458276
  0.91930000   2.56660767
  0.91940000   2.58047878
  0.91940000   1.86419731
  0.91940000   2.56265363
  0.91940000   1.90194477
  0.91940000   2.57948854
  0.91940000   1.86624369
  0.91940000   2.56367431
  0.91940000   1.89973747
  0.91940000   2.57862465
  0.91940000   1.86803513
  0.91940000   2.56455818
  0.91940000   1.89783011
  0.91940000   2.57786559
  0.91940000   1.86961286
  0.91940000   2.56532884
  0.91940000   1.89616948
  0.91940000   2.57719510
  0.91940000   1.87100881
  0.91940000   2.56600446
  0.91940000   1.89471512
  0.91940000   2.57660044
  0.91940000   1.87224831
  0.91940000   2.56659932
  0.91950000   2.58150053
  0.91950000   1.86223353
  0.91950000   2.56276136
  0.91950000   1.90194271
  0.91950000   2.58058568
  0.91950000   1.86412099
  0.91950000   2.56371350
  0.91950000   1.89987921
  0.91950000   2.57977862
  0.91950000   1.86579294
  0.91950000   2.56454903
  0.91950000   1.89807319
  0.91950000   2.57906143
  0.91950000   1.86728295
  0.91950000   2.56528706
  0.91950000   1.89648090
  0.91950000   2.57842053
  0.91950000   1.86861717
  0.91950000   2.56594245
  0.91950000   1.89506875
  0.91950000   2.57784530
  0.91950000   1.86981646
  0.91950000   2.56652704
  0.91960000   2.58250131
  0.91960000   1.86031178
  0.91960000   2.56288021
  0.91960000   1.90191670
  0.91960000   2.58167398
  0.91960000   1.86201415
  0.91960000   2.56374798
  0.91960000   1.90003056
  0.91960000   2.58093630
  0.91960000   1.86353968
  0.91960000   2.56451963
  0.91960000   1.89835885
  0.91960000   2.58027369
  0.91960000   1.86491470
  0.91960000   2.56520994
  0.91960000   1.89686685
  0.91960000   2.57967509
  0.91960000   1.86616003
  0.91960000   2.56583064
  0.91960000   1.89552758
  0.91960000   2.57913185
  0.91960000   1.86729233
  0.91960000   2.56639118
  0.91970000   2.58347419
  0.91970000   1.85844694
  0.91970000   2.56301882
  0.91970000   1.90184846
  0.91970000   2.58274658
  0.91970000   1.85993794
  0.91970000   2.56378583
  0.91970000   1.90017447
  0.91970000   2.58209110
  0.91970000   1.86128939
  0.91970000   2.56447708
  0.91970000   1.89867211
  0.91970000   2.58149634
  0.91970000   1.86252096
  0.91970000   2.56510329
  0.91970000   1.89731515
  0.91970000   2.58095356
  0.91970000   1.86364843
  0.91970000   2.56567321
  0.91970000   1.89608288
  0.91970000   2.58045590
  0.91970000   1.86468463
  0.91970000   2.56619401
  0.91980000   2.58441111
  0.91980000   1.85665638
  0.91980000   2.56318746
  0.91980000   1.90171621
  0.91980000   2.58379525
  0.91980000   1.85790995
  0.91980000   2.56383701
  0.91980000   1.90028990
  0.91980000   2.58323499
  0.91980000   1.85905931
  0.91980000   2.56443056
  0.91980000   1.89899362
  0.91980000   2.58272173
  0.91980000   1.86011803
  0.91980000   2.56497512
  0.91980000   1.89780894
  0.91980000   2.58224890
  0.91980000   1.86109729
  0.91980000   2.56547667
  0.91980000   1.89672099
  0.91980000   2.58181131
  0.91980000   1.86200632
  0.91980000   2.56594023
  0.91990000   2.58530264
  0.91990000   1.85496040
  0.91990000   2.56339831
  0.91990000   1.90149409
  0.91990000   2.58481024
  0.91990000   1.85595120
  0.91990000   2.56391370
  0.91990000   1.90035100
  0.91990000   2.58435815
  0.91990000   1.85687046
  0.91990000   2.56439173
  0.91990000   1.89929870
  0.91990000   2.58394028
  0.91990000   1.85772640
  0.91990000   2.56483614
  0.91990000   1.89832561
  0.91990000   2.58355199
  0.91990000   1.85852605
  0.91990000   2.56525040
  0.91990000   1.89742213
  0.91990000   2.58318960
  0.91990000   1.85927540
  0.91990000   2.56563759
  0.92000000   2.58613774
  0.92000000   1.85338281
  0.92000000   2.56366579
  0.92000000   1.90115144
  0.92000000   2.58577984
  0.92000000   1.85408687
  0.92000000   2.56403081
  0.92000000   1.90032615
  0.92000000   2.58544862
  0.92000000   1.85474854
  0.92000000   2.56437533
  0.92000000   1.89955613
  0.92000000   2.58514005
  0.92000000   1.85537165
  0.92000000   2.56470040
  0.92000000   1.89883543
  0.92000000   2.58485112
  0.92000000   1.85595971
  0.92000000   2.56500737
  0.92000000   1.89815891
  0.92000000   2.58457949
  0.92000000   1.85651588
  0.92000000   2.56529762
  0.92010000   2.58690343
  0.92010000   1.85195161
  0.92010000   2.56400693
  0.92010000   1.90065196
  0.92010000   2.58669000
  0.92010000   1.85234722
  0.92010000   2.56420653
  0.92010000   1.90017671
  0.92010000   2.58649177
  0.92010000   1.85272504
  0.92010000   2.56439989
  0.92010000   1.89972660
  0.92010000   2.58630617
  0.92010000   1.85308571
  0.92010000   2.56458615
  0.92010000   1.89929973
  0.92010000   2.58613145
  0.92010000   1.85343009
  0.92010000   2.56476506
  0.92010000   1.89889433
  0.92010000   2.58596631
  0.92010000   1.85375910
  0.92010000   2.56493669
  0.92020000   2.58758441
  0.92020000   1.85069980
  0.92020000   2.56444180
  0.92020000   1.89995282
  0.92020000   2.58752375
  0.92020000   1.85076883
  0.92020000   2.56446300
  0.92020000   1.89985552
  0.92020000   2.58746954
  0.92020000   1.85083880
  0.92020000   2.56448867
  0.92020000   1.89976067
  0.92020000   2.58742001
  0.92020000   1.85090864
  0.92020000   2.56451696
  0.92020000   1.89966850
  0.92020000   2.58737412
  0.92020000   1.85097771
  0.92020000   2.56454673
  0.92020000   1.89957912
  0.92020000   2.58733117
  0.92020000   1.85104558
  0.92020000   2.56457725
  0.92030000   2.58816262
  0.92030000   1.84966631
  0.92030000   2.56499400
  0.92030000   1.89900366
  0.92030000   2.58826048
  0.92030000   1.84939612
  0.92030000   2.56482720
  0.92030000   1.89930510
  0.92030000   2.58835954
  0.92030000   1.84913807
  0.92030000   2.56467090
  0.92030000   1.89959618
  0.92030000   2.58845804
  0.92030000   1.84889111
  0.92030000   2.56452327
  0.92030000   1.89987707
  0.92030000   2.58855494
  0.92030000   1.84865454
  0.92030000   2.56438318
  0.92030000   1.90014790
  0.92030000   2.58864962
  0.92030000   1.84842785
  0.92030000   2.56424986
  0.92040000   2.58861676
  0.92040000   1.84889709
  0.92040000   2.56569104
  0.92040000   1.89774552
  0.92040000   2.58887506
  0.92040000   1.84828325
  0.92040000   2.56533189
  0.92040000   1.89845550
  0.92040000   2.58913372
  0.92040000   1.84768329
  0.92040000   2.56498331
  0.92040000   1.89915486
  0.92040000   2.58939016
  0.92040000   1.84709793
  0.92040000   2.56464451
  0.92040000   1.89984160
  0.92040000   2.58964257
  0.92040000   1.84652809
  0.92040000   2.56431533
  0.92040000   1.90051377
  0.92040000   2.58988961
  0.92040000   1.84597483
  0.92040000   2.56399591
  0.92050000   2.58892172
  0.92050000   1.84844628
  0.92050000   2.56656480
  0.92050000   1.89611004
  0.92050000   2.58933679
  0.92050000   1.84749641
  0.92050000   2.56601671
  0.92050000   1.89722196
  0.92050000   2.58975669
  0.92050000   1.84655072
  0.92050000   2.56547211
  0.92050000   1.89833814
  0.92050000   2.59017741
  0.92050000   1.84561303
  0.92050000   2.56493192
  0.92050000   1.89945292
  0.92050000   2.59059558
  0.92050000   1.84468760
  0.92050000   2.56439786
  0.92050000   1.90056037
  0.92050000   2.59100830
  0.92050000   1.84377884
  0.92050000   2.56387207
  0.92060000   2.58904806
  0.92060000   1.84837731
  0.92060000   2.56765170
  0.92060000   1.89401890
  0.92060000   2.58960810
  0.92060000   1.84711650
  0.92060000   2.56692923
  0.92060000   1.89550253
  0.92060000   2.59018353
  0.92060000   1.84583713
  0.92060000   2.56619521
  0.92060000   1.89702220
  0.92060000   2.59076868
  0.92060000   1.84454654
  0.92060000   2.56545233
  0.92060000   1.89856847
  0.92060000   2.59135818
  0.92060000   1.84325327
  0.92060000   2.56470457
  0.92060000   1.90013056
  0.92060000   2.59194679
  0.92060000   1.84196676
  0.92060000   2.56395684
  0.92070000   2.58896157
  0.92070000   1.84876388
  0.92070000   2.56899256
  0.92070000   1.89138406
  0.92070000   2.58964329
  0.92070000   1.84724199
  0.92070000   2.56812575
  0.92070000   1.89317630
  0.92070000   2.59035709
  0.92070000   1.84566560
  0.92070000   2.56722474
  0.92070000   1.89505260
  0.92070000   2.59109629
  0.92070000   1.84404422
  0.92070000   2.56629286
  0.92070000   1.89700207
  0.92070000   2.59185378
  0.92070000   1.84239011
  0.92070000   2.56533572
  0.92070000   1.89901041
  0.92070000   2.59262177
  0.92070000   1.84071810
  0.92070000   2.56436095
  0.92080000   2.58862305
  0.92080000   1.84969041
  0.92080000   2.57063186
  0.92080000   1.88810929
  0.92080000   2.58938724
  0.92080000   1.84799149
  0.92080000   2.56967134
  0.92080000   1.89010308
  0.92080000   2.59020499
  0.92080000   1.84619191
  0.92080000   2.56864887
  0.92080000   1.89223994
  0.92080000   2.59107028
  0.92080000   1.84429971
  0.92080000   2.56756604
  0.92080000   1.89451265
  0.92080000   2.59197577
  0.92080000   1.84232761
  0.92080000   2.56642775
  0.92080000   1.89690829
  0.92080000   2.59291229
  0.92080000   1.84029334
  0.92080000   2.56524237
  0.92090000   2.58798851
  0.92090000   1.85125154
  0.92090000   2.57261593
  0.92090000   1.88409386
  0.92090000   2.58877477
  0.92090000   1.84950519
  0.92090000   2.57163832
  0.92090000   1.88612645
  0.92090000   2.58963683
  0.92090000   1.84761047
  0.92090000   2.57057207
  0.92090000   1.88835919
  0.92090000   2.59057190
  0.92090000   1.84556842
  0.92090000   2.56941377
  0.92090000   1.89079537
  0.92090000   2.59157538
  0.92090000   1.84338583
  0.92090000   2.56816368
  0.92090000   1.89343186
  0.92090000   2.59263992
  0.92090000   1.84107651
  0.92090000   2.56682646
  0.92100000   2.58701013
  0.92100000   1.85355005
  0.92100000   2.57498980
  0.92100000   1.87923924
  0.92100000   2.58773117
  0.92100000   1.85194360
  0.92100000   2.57410204
  0.92100000   1.88108264
  0.92100000   2.58854296
  0.92100000   1.85015680
  0.92100000   2.57311080
  0.92100000   1.88315826
  0.92100000   2.58944815
  0.92100000   1.84817901
  0.92100000   2.57200573
  0.92100000   1.88548420
  0.92100000   2.59044829
  0.92100000   1.84600380
  0.92100000   2.57077882
  0.92100000   1.88807497
  0.92100000   2.59154253
  0.92100000   1.84363096
  0.92100000   2.56942536
  0.92110000   2.58563834
  0.92110000   1.85669241
  0.92110000   2.57779214
  0.92110000   1.87345990
  0.92110000   2.58617510
  0.92110000   1.85548126
  0.92110000   2.57713223
  0.92110000   1.87481873
  0.92110000   2.58679740
  0.92110000   1.85410113
  0.92110000   2.57638093
  0.92110000   1.87638454
  0.92110000   2.58751235
  0.92110000   1.85253186
  0.92110000   2.57552371
  0.92110000   1.87818452
  0.92110000   2.58832788
  0.92110000   1.85075341
  0.92110000   2.57454589
  0.92110000   1.88024750
  0.92110000   2.58925178
  0.92110000   1.84874700
  0.92110000   2.57343296
  0.92120000   2.58382535
  0.92120000   1.86078097
  0.92120000   2.58104804
  0.92120000   1.86669882
  0.92120000   2.58402529
  0.92120000   1.86029211
  0.92120000   2.58077861
  0.92120000   1.86722359
  0.92120000   2.58426893
  0.92120000   1.85972417
  0.92120000   2.58047158
  0.92120000   1.86784072
  0.92120000   2.58456037
  0.92120000   1.85906355
  0.92120000   2.58011809
  0.92120000   1.86856547
  0.92120000   2.58490542
  0.92120000   1.85829486
  0.92120000   2.57970869
  0.92120000   1.86941573
  0.92120000   2.58531133
  0.92120000   1.85740067
  0.92120000   2.57923288
  0.92130000   2.58153064
  0.92130000   1.86590226
  0.92130000   2.58475991
  0.92130000   1.85894728
  0.92130000   2.58121255
  0.92130000   1.86652354
  0.92130000   2.58505025
  0.92130000   1.85827235
  0.92130000   2.58084550
  0.92130000   1.86726424
  0.92130000   2.58540222
  0.92130000   1.85747709
  0.92130000   2.58041718
  0.92130000   1.86814594
  0.92130000   2.58582413
  0.92130000   1.85653988
  0.92130000   2.57991419
  0.92130000   1.86919436
  0.92130000   2.58632639
  0.92130000   1.85543609
  0.92130000   2.57932146
  0.92130000   1.87043986
  0.92130000   2.58692126
  0.92140000   2.57872825
  0.92140000   1.87211110
  0.92140000   2.58889748
  0.92140000   1.85026672
  0.92140000   2.57769773
  0.92140000   1.87425762
  0.92140000   2.58989150
  0.92140000   1.84807907
  0.92140000   2.57647515
  0.92140000   1.87682910
  0.92140000   2.59106890
  0.92140000   1.84550862
  0.92140000   2.57502481
  0.92140000   1.87989666
  0.92140000   2.59244863
  0.92140000   1.84251054
  0.92140000   2.57331060
  0.92140000   1.88353388
  0.92140000   2.59404561
  0.92140000   1.83904992
  0.92140000   2.57129936
  0.92140000   1.88780877
  0.92140000   2.59586545
  0.92150000   2.57541552
  0.92150000   1.87941183
  0.92150000   2.59338926
  0.92150000   1.84080769
  0.92150000   2.57349417
  0.92150000   1.88346287
  0.92150000   2.59516193
  0.92150000   1.83694106
  0.92150000   2.57121844
  0.92150000   1.88828344
  0.92150000   2.59720277
  0.92150000   1.83250698
  0.92150000   2.56855628
  0.92150000   1.89393538
  0.92150000   2.59949419
  0.92150000   1.82753864
  0.92150000   2.56550435
  0.92150000   1.90042040
  0.92150000   2.60198336
  0.92150000   1.82214643
  0.92150000   2.56210872
  0.92150000   1.90763539
  0.92150000   2.60457209
  0.92160000   2.57162208
  0.92160000   1.88773911
  0.92160000   2.59811886
  0.92160000   1.83081845
  0.92160000   2.56868931
  0.92160000   1.89394817
  0.92160000   2.60063293
  0.92160000   1.82534756
  0.92160000   2.56529292
  0.92160000   1.90115486
  0.92160000   2.60338135
  0.92160000   1.81937898
  0.92160000   2.56148787
  0.92160000   1.90923317
  0.92160000   2.60623729
  0.92160000   1.81318110
  0.92160000   2.55742600
  0.92160000   1.91785266
  0.92160000   2.60901502
  0.92160000   1.80715144
  0.92160000   2.55336678
  0.92160000   1.92645685
  0.92160000   2.61150362
  0.92170000   2.56741675
  0.92170000   1.89694319
  0.92170000   2.60292993
  0.92170000   1.82063481
  0.92170000   2.56345648
  0.92170000   1.90533848
  0.92170000   2.60601351
  0.92170000   1.81392530
  0.92170000   2.55907635
  0.92170000   1.91463006
  0.92170000   2.60912382
  0.92170000   1.80716280
  0.92170000   2.55452993
  0.92170000   1.92426840
  0.92170000   2.61200387
  0.92170000   1.80089783
  0.92170000   2.55020065
  0.92170000   1.93343375
  0.92170000   2.61440690
  0.92170000   1.79566244
  0.92170000   2.54649686
  0.92170000   1.94126098
  0.92170000   2.61619400
  0.92180000   2.56290995
  0.92180000   1.90678534
  0.92180000   2.60764220
  0.92180000   1.81064578
  0.92180000   2.55804649
  0.92180000   1.91709442
  0.92180000   2.61100745
  0.92180000   1.80331527
  0.92180000   2.55304132
  0.92180000   1.92769866
  0.92180000   2.61404594
  0.92180000   1.79669327
  0.92180000   2.54838858
  0.92180000   1.93754158
  0.92180000   2.61647111
  0.92180000   1.79139753
  0.92180000   2.54457838
  0.92180000   1.94558606
  0.92180000   2.61816344
  0.92180000   1.78768930
  0.92180000   2.54186277
  0.92180000   1.95130647
  0.92180000   2.61920436
  0.92190000   2.55824901
  0.92190000   1.91694858
  0.92190000   2.61207741
  0.92190000   1.80123761
  0.92190000   2.55275347
  0.92190000   1.92858721
  0.92190000   2.61538486
  0.92190000   1.79401775
  0.92190000   2.54763121
  0.92190000   1.93942014
  0.92190000   2.61798465
  0.92190000   1.78833077
  0.92190000   2.54349344
  0.92190000   1.94815234
  0.92190000   2.61973478
  0.92190000   1.78448652
  0.92190000   2.54064439
  0.92190000   1.95414945
  0.92190000   2.62075309
  0.92190000   1.78223510
  0.92190000   2.53895510
  0.92190000   1.95769387
  0.92190000   2.62128166
  0.92200000   2.55360518
  0.92200000   1.92706617
  0.92200000   2.61608925
  0.92200000   1.79272874
  0.92200000   2.54786054
  0.92200000   1.93921559
  0.92200000   2.61903581
  0.92200000   1.78627556
  0.92200000   2.54313489
  0.92200000   1.94918871
  0.92200000   2.62100892
  0.92200000   1.78193519
  0.92200000   2.53989050
  0.92200000   1.95601678
  0.92200000   2.62212099
  0.92200000   1.77947018
  0.92200000   2.53802273
  0.92200000   1.95993339
  0.92200000   2.62266730
  0.92200000   1.77824427
  0.92200000   2.53708518
  0.92200000   1.96188813
  0.92200000   2.62291183
  0.92210000   2.54915373
  0.92210000   1.93676481
  0.92210000   2.61958796
  0.92210000   1.78531622
  0.92210000   2.54358289
  0.92210000   1.94852657
  0.92210000   2.62197933
  0.92210000   1.78005345
  0.92210000   2.53962875
  0.92210000   1.95685147
  0.92210000   2.62332536
  0.92210000   1.77706725
  0.92210000   2.53734895
  0.92210000   1.96163299
  0.92210000   2.62396296
  0.92210000   1.77563303
  0.92210000   2.53624234
  0.92210000   1.96393970
  0.92210000   2.62423104
  0.92210000   1.77501482
  0.92210000   2.53576068
  0.92210000   1.96493176
  0.92210000   2.62433464
  0.92220000   2.54505076
  0.92220000   1.94571408
  0.92220000   2.62255108
  0.92220000   1.77905230
  0.92220000   2.54003005
  0.92220000   1.95629340
  0.92220000   2.62432741
  0.92220000   1.77511473
  0.92220000   2.53700925
  0.92220000   1.96263479
  0.92220000   2.62516309
  0.92220000   1.77323585
  0.92220000   2.53554939
  0.92220000   1.96568103
  0.92220000   2.62549793
  0.92220000   1.77246290
  0.92220000   2.53494238
  0.92220000   1.96693251
  0.92220000   2.62561807
  0.92220000   1.77216952
  0.92220000   2.53470829
  0.92220000   1.96740221
  0.92220000   2.62565605
  0.92230000   2.54141243
  0.92230000   1.95367017
  0.92230000   2.62501672
  0.92230000   1.77385826
  0.92230000   2.53720120
  0.92230000   1.96252322
  0.92230000   2.62622944
  0.92230000   1.77114034
  0.92230000   2.53507928
  0.92230000   1.96695987
  0.92230000   2.62670537
  0.92230000   1.77004613
  0.92230000   2.53421486
  0.92230000   1.96874783
  0.92230000   2.62686596
  0.92230000   1.76965593
  0.92230000   2.53390170
  0.92230000   1.96937918
  0.92230000   2.62691261
  0.92230000   1.76952477
  0.92230000   2.53379279
  0.92230000   1.96958490
  0.92230000   2.62692148
  0.92240000   2.53830182
  0.92240000   1.96050271
  0.92240000   2.62706366
  0.92240000   1.76956711
  0.92240000   2.53501074
  0.92240000   1.96740119
  0.92240000   2.62782621
  0.92240000   1.76782794
  0.92240000   2.53363125
  0.92240000   1.97026742
  0.92240000   2.62807422
  0.92240000   1.76723384
  0.92240000   2.53315294
  0.92240000   1.97124022
  0.92240000   2.62814179
  0.92240000   1.76704921
  0.92240000   2.53299962
  0.92240000   1.97153446
  0.92240000   2.62815390
  0.92240000   1.76699471
  0.92240000   2.53295054
  0.92240000   1.97161408
  0.92240000   2.62815048
  0.92250000   2.53572665
  0.92250000   1.96619871
  0.92250000   2.62878683
  0.92250000   1.76597609
  0.92250000   2.53332892
  0.92250000   1.97120407
  0.92250000   2.62922710
  0.92250000   1.76494160
  0.92250000   2.53249483
  0.92250000   1.97291800
  0.92250000   2.62934234
  0.92250000   1.76464077
  0.92250000   2.53224601
  0.92250000   1.97340662
  0.92250000   2.62936330
  0.92250000   1.76455983
  0.92250000   2.53217421
  0.92250000   1.97352901
  0.92250000   2.62936009
  0.92250000   1.76453960
  0.92250000   2.53215216
  0.92250000   1.97355171
  0.92250000   2.62935181
  0.92260000   2.53364735
  0.92260000   1.97084448
  0.92260000   2.63027699
  0.92260000   1.76289054
  0.92260000   2.53201973
  0.92260000   1.97422048
  0.92260000   2.63050686
  0.92260000   1.76231925
  0.92260000   2.53154963
  0.92260000   1.97516597
  0.92260000   2.63055018
  0.92260000   1.76217850
  0.92260000   2.53142752
  0.92260000   1.97538743
  0.92260000   2.63054925
  0.92260000   1.76214665
  0.92260000   2.53139474
  0.92260000   1.97542763
  0.92260000   2.63053971
  0.92260000   1.76214071
  0.92260000   2.53138410
  0.92260000   1.97542633
  0.92260000   2.63052968
  0.92270000   2.53199231
  0.92270000   1.97459329
  0.92270000   2.63160879
  0.92270000   1.76014959
  0.92270000   2.53096543
  0.92270000   1.97669961
  0.92270000   2.63171223
  0.92270000   1.75985898
  0.92270000   2.53071866
  0.92270000   1.97717392
  0.92270000   2.63171934
  0.92270000   1.75979963
  0.92270000   2.53066165
  0.92270000   1.97725818
  0.92270000   2.63170888
  0.92270000   1.75978936
  0.92270000   2.53064622
  0.92270000   1.97726189
  0.92270000   2.63169698
  0.92270000   1.75978884
  0.92270000   2.53063998
  0.92270000   1.97725136
  0.92270000   2.63168642
  0.92280000   2.53067516
  0.92280000   1.97762867
  0.92280000   2.63283727
  0.92280000   1.75763411
  0.92280000   2.53007636
  0.92280000   1.97883094
  0.92280000   2.63287071
  0.92280000   1.75750058
  0.92280000   2.52995595
  0.92280000   1.97903883
  0.92280000   2.63286103
  0.92280000   1.75747941
  0.92280000   2.52992982
  0.92280000   1.97905810
  0.92280000   2.63284685
  0.92280000   1.75747773
  0.92280000   2.52992139
  0.92280000   1.97904711
  0.92280000   2.63283421
  0.92280000   1.75747896
  0.92280000   2.52991662
  0.92280000   1.97903351
  0.92280000   2.63282356
  0.92290000   2.52960997
  0.92290000   1.98013270
  0.92290000   2.63399966
  0.92290000   1.75526307
  0.92290000   2.52929043
  0.92290000   1.98074558
  0.92290000   2.63399771
  0.92290000   1.75521009
  0.92290000   2.52923551
  0.92290000   1.98081552
  0.92290000   2.63398106
  0.92290000   1.75520507
  0.92290000   2.52922260
  0.92290000   1.98080701
  0.92290000   2.63396565
  0.92290000   1.75520631
  0.92290000   2.52921661
  0.92290000   1.98079092
  0.92290000   2.63395287
  0.92290000   1.75520792
  0.92290000   2.52921222
  0.92290000   1.98077657
  0.92290000   2.63394227
  0.92300000   2.52872149
  0.92300000   1.98226451
  0.92300000   2.63511945
  0.92300000   1.75298500
  0.92300000   2.52856777
  0.92300000   1.98252768
  0.92300000   2.63510156
  0.92300000   1.75296907
  0.92300000   2.52854330
  0.92300000   1.98253357
  0.92300000   2.63508247
  0.92300000   1.75296989
  0.92300000   2.52853528
  0.92300000   1.98251483
  0.92300000   2.63506680
  0.92300000   1.75297185
  0.92300000   2.52852995
  0.92300000   1.98249741
  0.92300000   2.63505407
  0.92300000   1.75297341
  0.92300000   2.52852555
  0.92300000   1.98248308
  0.92300000   2.63504354
  0.92310000   2.52795015
  0.92310000   1.98414999
  0.92310000   2.63621060
  0.92310000   1.75076910
  0.92310000   2.52788439
  0.92310000   1.98422785
  0.92310000   2.63618667
  0.92310000   1.75076773
  0.92310000   2.52787208
  0.92310000   1.98420825
  0.92310000   2.63616698
  0.92310000   1.75077015
  0.92310000   2.52786545
  0.92310000   1.98418664
  0.92310000   2.63615135
  0.92310000   1.75077209
  0.92310000   2.52786017
  0.92310000   1.98416915
  0.92310000   2.63613871
  0.92310000   1.75077349
  0.92310000   2.52785569
  0.92310000   1.98415502
  0.92310000   2.63612826
  0.92320000   2.52725263
  0.92320000   1.98588057
  0.92320000   2.63728094
  0.92320000   1.74859794
  0.92320000   2.52722678
  0.92320000   1.98587456
  0.92320000   2.63725536
  0.92320000   1.74860092
  0.92320000   2.52721821
  0.92320000   1.98584719
  0.92320000   2.63723568
  0.92320000   1.74860346
  0.92320000   2.52721176
  0.92320000   1.98582527
  0.92320000   2.63722017
  0.92320000   1.74860521
  0.92320000   2.52720637
  0.92320000   1.98580803
  0.92320000   2.63720762
  0.92320000   1.74860644
  0.92320000   2.52720179
  0.92320000   1.98579413
  0.92320000   2.63719725
  0.92330000   2.52659992
  0.92330000   1.98751755
  0.92330000   2.63833459
  0.92330000   1.74646225
  0.92330000   2.52658787
  0.92330000   1.98748269
  0.92330000   2.63830892
  0.92330000   1.74646580
  0.92330000   2.52657988
  0.92330000   1.98745419
  0.92330000   2.63828939
  0.92330000   1.74646810
  0.92330000   2.52657330
  0.92330000   1.98743259
  0.92330000   2.63827400
  0.92330000   1.74646964
  0.92330000   2.52656779
  0.92330000   1.98741564
  0.92330000   2.63826154
  0.92330000   1.74647071
  0.92330000   2.52656312
  0.92330000   1.98740196
  0.92330000   2.63825123
  0.92340000   2.52597414
  0.92340000   1.98909863
  0.92340000   2.63937363
  0.92340000   1.74435735
  0.92340000   2.52596430
  0.92340000   1.98905933
  0.92340000   2.63934820
  0.92340000   1.74436056
  0.92340000   2.52595611
  0.92340000   1.98903133
  0.92340000   2.63932882
  0.92340000   1.74436258
  0.92340000   2.52594937
  0.92340000   1.98901011
  0.92340000   2.63931354
  0.92340000   1.74436393
  0.92340000   2.52594374
  0.92340000   1.98899342
  0.92340000   2.63930116
  0.92340000   1.74436486
  0.92340000   2.52593899
  0.92340000   1.98897994
  0.92340000   2.63929092
  0.92350000   2.52536542
  0.92350000   1.99064460
  0.92350000   2.64039905
  0.92350000   1.74228096
  0.92350000   2.52535461
  0.92350000   1.99060751
  0.92350000   2.64037383
  0.92350000   1.74228381
  0.92350000   2.52534621
  0.92350000   1.99058001
  0.92350000   2.64035459
  0.92350000   1.74228559
  0.92350000   2.52533932
  0.92350000   1.99055914
  0.92350000   2.64033941
  0.92350000   1.74228676
  0.92350000   2.52533359
  0.92350000   1.99054270
  0.92350000   2.64032710
  0.92350000   1.74228755
  0.92350000   2.52532876
  0.92350000   1.99052941
  0.92350000   2.64031692
  0.92360000   2.52476924
  0.92360000   1.99216500
  0.92360000   2.64141145
  0.92360000   1.74023181
  0.92360000   2.52475819
  0.92360000   1.99212851
  0.92360000   2.64138641
  0.92360000   1.74023434
  0.92360000   2.52474960
  0.92360000   1.99210148
  0.92360000   2.64136730
  0.92360000   1.74023589
  0.92360000   2.52474257
  0.92360000   1.99208092
  0.92360000   2.64135221
  0.92360000   1.74023689
  0.92360000   2.52473674
  0.92360000   1.99206471
  0.92360000   2.64133998
  0.92360000   1.74023755
  0.92360000   2.52473184
  0.92360000   1.99205159
  0.92360000   2.64132986
  0.92370000   2.52418433
  0.92370000   1.99366244
  0.92370000   2.64241126
  0.92370000   1.73820893
  0.92370000   2.52417463
  0.92370000   1.99362317
  0.92370000   2.64238649
  0.92370000   1.73821098
  0.92370000   2.52416571
  0.92370000   1.99359688
  0.92370000   2.64236750
  0.92370000   1.73821233
  0.92370000   2.52415857
  0.92370000   1.99357659
  0.92370000   2.64235250
  0.92370000   1.73821318
  0.92370000   2.52415265
  0.92370000   1.99356060
  0.92370000   2.64234033
  0.92370000   1.73821372
  0.92370000   2.52414768
  0.92370000   1.99354764
  0.92370000   2.64233026
  0.92380000   2.52361118
  0.92380000   1.99513586
  0.92380000   2.64339901
  0.92380000   1.73621126
  0.92380000   2.52360344
  0.92380000   1.99509252
  0.92380000   2.64337459
  0.92380000   1.73621266
  0.92380000   2.52359403
  0.92380000   1.99506731
  0.92380000   2.64335569
  0.92380000   1.73621387
  0.92380000   2.52358682
  0.92380000   1.99504721
  0.92380000   2.64334077
  0.92380000   1.73621455
  0.92380000   2.52358081
  0.92380000   1.99503143
  0.92380000   2.64332867
  0.92380000   1.73621498
  0.92380000   2.52357577
  0.92380000   1.99501862
  0.92380000   2.64331866
  0.92390000   2.52305095
  0.92390000   1.99658279
  0.92390000   2.64437531
  0.92390000   1.73423755
  0.92390000   2.52304392
  0.92390000   1.99653801
  0.92390000   2.64435118
  0.92390000   1.73423840
  0.92390000   2.52303409
  0.92390000   1.99651373
  0.92390000   2.64433235
  0.92390000   1.73423948
  0.92390000   2.52302683
  0.92390000   1.99649376
  0.92390000   2.64431752
  0.92390000   1.73424002
  0.92390000   2.52302073
  0.92390000   1.99647819
  0.92390000   2.64430548
  0.92390000   1.73424035
  0.92390000   2.52301564
  0.92390000   1.99646552
  0.92390000   2.64429551
  0.92400000   2.52250472
  0.92400000   1.99800090
  0.92400000   2.64534080
  0.92400000   1.73228643
  0.92400000   2.52249523
  0.92400000   1.99796142
  0.92400000   2.64531665
  0.92400000   1.73228736
  0.92400000   2.52248554
  0.92400000   1.99793687
  0.92400000   2.64529794
  0.92400000   1.73228824
  0.92400000   2.52247814
  0.92400000   1.99791721
  0.92400000   2.64528318
  0.92400000   1.73228865
  0.92400000   2.52247197
  0.92400000   1.99790182
  0.92400000   2.64527120
  0.92400000   1.73228888
  0.92400000   2.52246682
  0.92400000   1.99788928
  0.92400000   2.64526127
  0.92410000   2.52197301
  0.92410000   1.99938908
  0.92410000   2.64629617
  0.92410000   1.73035652
  0.92410000   2.52195650
  0.92410000   1.99936455
  0.92410000   2.64627135
  0.92410000   1.73035884
  0.92410000   2.52194809
  0.92410000   1.99933732
  0.92410000   2.64625289
  0.92410000   1.73035921
  0.92410000   2.52194031
  0.92410000   1.99931852
  0.92410000   2.64623817
  0.92410000   1.73035957
  0.92410000   2.52193413
  0.92410000   1.99930315
  0.92410000   2.64622625
  0.92410000   1.73035969
  0.92410000   2.52192892
  0.92410000   1.99929077
  0.92410000   2.64621637
  0.92420000   2.52145544
  0.92420000   2.00074811
  0.92420000   2.64724196
  0.92420000   1.72844664
  0.92420000   2.52142700
  0.92420000   2.00074896
  0.92420000   2.64721557
  0.92420000   1.72845220
  0.92420000   2.52142153
  0.92420000   2.00071553
  0.92420000   2.64719764
  0.92420000   1.72845153
  0.92420000   2.52141287
  0.92420000   2.00069862
  0.92420000   2.64718288
  0.92420000   1.72845200
  0.92420000   2.52140683
  0.92420000   2.00068298
  0.92420000   2.64717104
  0.92420000   1.72845197
  0.92420000   2.52140151
  0.92420000   2.00067083
  0.92420000   2.64716119
  0.92430000   2.52095059
  0.92430000   2.00208100
  0.92430000   2.64817855
  0.92430000   1.72655599
  0.92430000   2.52090633
  0.92430000   2.00211548
  0.92430000   2.64814963
  0.92430000   1.72656682
  0.92430000   2.52090562
  0.92430000   2.00207199
  0.92430000   2.64813260
  0.92430000   1.72656433
  0.92430000   2.52089538
  0.92430000   2.00205844
  0.92430000   2.64811765
  0.92430000   1.72656520
  0.92430000   2.52088973
  0.92430000   2.00204201
  0.92430000   2.64810594
  0.92430000   1.72656493
  0.92430000   2.52088423
  0.92430000   2.00203025
  0.92430000   2.64809611
  0.92440000   2.52045589
  0.92440000   2.00339313
  0.92440000   2.64910603
  0.92440000   1.72468438
  0.92440000   2.52039458
  0.92440000   2.00346390
  0.92440000   2.64907389
  0.92440000   1.72470194
  0.92440000   2.52039998
  0.92440000   2.00340746
  0.92440000   2.64905813
  0.92440000   1.72469685
  0.92440000   2.52038746
  0.92440000   2.00339880
  0.92440000   2.64904283
  0.92440000   1.72469847
  0.92440000   2.52038251
  0.92440000   2.00338088
  0.92440000   2.64903130
  0.92440000   1.72469783
  0.92440000   2.52037671
  0.92440000   2.00336979
  0.92440000   2.64902147
  0.92450000   2.51996774
  0.92450000   2.00469220
  0.92450000   2.65002414
  0.92450000   1.72283235
  0.92450000   2.51989251
  0.92450000   2.00479258
  0.92450000   2.64998883
  0.92450000   1.72285655
  0.92450000   2.51990400
  0.92450000   2.00472324
  0.92450000   2.64997453
  0.92450000   1.72284847
  0.92450000   2.51988882
  0.92450000   2.00472025
  0.92450000   2.64995874
  0.92450000   1.72285113
  0.92450000   2.51988484
  0.92450000   2.00470029
  0.92450000   2.64994747
  0.92450000   1.72284998
  0.92450000   2.51987861
  0.92450000   2.00469014
  0.92450000   2.64993760
  0.92460000   2.51948155
  0.92460000   2.00598790
  0.92460000   2.65093221
  0.92460000   1.72100128
  0.92460000   2.51940166
  0.92460000   2.00609826
  0.92460000   2.65089516
  0.92460000   1.72102920
  0.92460000   2.51941666
  0.92460000   2.00602148
  0.92460000   2.65088197
  0.92460000   1.72101882
  0.92460000   2.51939940
  0.92460000   2.00602293
  0.92460000   2.65086573
  0.92460000   1.72102245
  0.92460000   2.51939635
  0.92460000   2.00600103
  0.92460000   2.65085474
  0.92460000   1.72102075
  0.92460000   2.51938963
  0.92460000   2.00599192
  0.92460000   2.65084480
  0.92470000   2.51899208
  0.92470000   2.00729137
  0.92470000   2.65182915
  0.92470000   1.71919348
  0.92470000   2.51892438
  0.92470000   2.00737589
  0.92470000   2.65179383
  0.92470000   1.71921792
  0.92470000   2.51893639
  0.92470000   2.00730548
  0.92470000   2.65178046
  0.92470000   1.71920790
  0.92470000   2.51891947
  0.92470000   2.00730625
  0.92470000   2.65176423
  0.92470000   1.71921156
  0.92470000   2.51891649
  0.92470000   2.00728421
  0.92470000   2.65175335
  0.92470000   1.71920963
  0.92470000   2.51890958
  0.92470000   2.00727552
  0.92470000   2.65174340
  0.92480000   2.51849374
  0.92480000   2.00861448
  0.92480000   2.65271347
  0.92480000   1.71741208
  0.92480000   2.51846384
  0.92480000   2.00861875
  0.92480000   2.65268612
  0.92480000   1.71742002
  0.92480000   2.51846101
  0.92480000   2.00857992
  0.92480000   2.65266977
  0.92480000   1.71741624
  0.92480000   2.51844975
  0.92480000   2.00856867
  0.92480000   2.65265476
  0.92480000   1.71741737
  0.92480000   2.51844452
  0.92480000   2.00855144
  0.92480000   2.65264348
  0.92480000   1.71741630
  0.92480000   2.51843842
  0.92480000   2.00854105
  0.92480000   2.65263372
  0.92490000   2.51798104
  0.92490000   2.00996892
  0.92490000   2.65358337
  0.92490000   1.71566090
  0.92490000   2.51802389
  0.92490000   2.00981861
  0.92490000   2.65357364
  0.92490000   1.71563211
  0.92490000   2.51798757
  0.92490000   2.00985097
  0.92490000   2.65354932
  0.92490000   1.71564497
  0.92490000   2.51799155
  0.92490000   2.00980737
  0.92490000   2.65353805
  0.92490000   1.71563835
  0.92490000   2.51797926
  0.92490000   2.00980516
  0.92490000   2.65352512
  0.92490000   1.71564073
  0.92490000   2.51797634
  0.92490000   2.00978802
  0.92490000   2.65351617
  0.92500000   2.51744905
  0.92500000   2.01136518
  0.92500000   2.65443681
  0.92500000   1.71394424
  0.92500000   2.51760885
  0.92500000   2.01096625
  0.92500000   2.65445835
  0.92500000   1.71385011
  0.92500000   2.51751248
  0.92500000   2.01112634
  0.92500000   2.65441824
  0.92500000   1.71389602
  0.92500000   2.51754689
  0.92500000   2.01101805
  0.92500000   2.65441507
  0.92500000   1.71387247
  0.92500000   2.51751907
  0.92500000   2.01104888
  0.92500000   2.65439810
  0.92500000   1.71388333
  0.92500000   2.51752396
  0.92500000   2.01101516
  0.92500000   2.65439125
  0.92510000   2.51689385
  0.92510000   2.01281164
  0.92510000   2.65527171
  0.92510000   1.71226658
  0.92510000   2.51722327
  0.92510000   2.01205195
  0.92510000   2.65534245
  0.92510000   1.71206935
  0.92510000   2.51703152
  0.92510000   2.01241495
  0.92510000   2.65527523
  0.92510000   1.71217210
  0.92510000   2.51711856
  0.92510000   2.01219475
  0.92510000   2.65528712
  0.92510000   1.71211701
  0.92510000   2.51706161
  0.92510000   2.01228756
  0.92510000   2.65526195
  0.92510000   1.71214506
  0.92510000   2.51708242
  0.92510000   2.01222000
  0.92510000   2.65525964
  0.92520000   2.51631288
  0.92520000   2.01431379
  0.92520000   2.65608606
  0.92520000   1.71063217
  0.92520000   2.51687156
  0.92520000   2.01306625
  0.92520000   2.65622834
  0.92520000   1.71028481
  0.92520000   2.51654008
  0.92520000   2.01372666
  0.92520000   2.65611864
  0.92520000   1.71047671
  0.92520000   2.51671012
  0.92520000   2.01332985
  0.92520000   2.65615587
  0.92520000   1.71036849
  0.92520000   2.51660378
  0.92520000   2.01352778
  0.92520000   2.65611586
  0.92520000   1.71042768
  0.92520000   2.51665356
  0.92520000   2.01339859
  0.92520000   2.65612229
  0.92530000   2.51570524
  0.92530000   2.01587352
  0.92530000   2.65687817
  0.92530000   1.70904468
  0.92530000   2.51655763
  0.92530000   2.01400081
  0.92530000   2.65711838
  0.92530000   1.70849146
  0.92530000   2.51603343
  0.92530000   2.01507150
  0.92530000   2.65694648
  0.92530000   1.70881408
  0.92530000   2.51632585
  0.92530000   2.01441424
  0.92530000   2.65702336
  0.92530000   1.70862256
  0.92530000   2.51614166
  0.92530000   2.01477789
  0.92530000   2.65695857
  0.92530000   1.70873383
  0.92530000   2.51624013
  0.92530000   2.01454508
  0.92530000   2.65698052
  0.92540000   2.51507197
  0.92540000   2.01748868
  0.92540000   2.65764686
  0.92540000   1.70750667
  0.92540000   2.51628438
  0.92540000   2.01484932
  0.92540000   2.65801478
  0.92540000   1.70668462
  0.92540000   2.51550714
  0.92540000   2.01645897
  0.92540000   2.65775653
  0.92540000   1.70718892
  0.92540000   2.51597053
  0.92540000   2.01543768
  0.92540000   2.65789201
  0.92540000   1.70687415
  0.92540000   2.51567054
  0.92540000   2.01604791
  0.92540000   2.65778834
  0.92540000   1.70706721
  0.92540000   2.51584585
  0.92540000   2.01565152
  0.92540000   2.65783610
  0.92550000   2.51441623
  0.92550000   2.01915256
  0.92550000   2.65839172
  0.92550000   1.70601908
  0.92550000   2.51605324
  0.92550000   2.01560866
  0.92550000   2.65891931
  0.92550000   1.70486059
  0.92550000   2.51495754
  0.92550000   2.01789686
  0.92550000   2.65854653
  0.92550000   1.70560604
  0.92550000   2.51564910
  0.92550000   2.01638958
  0.92550000   2.65876451
  0.92550000   1.70511760
  0.92550000   2.51518512
  0.92550000   2.01734916
  0.92550000   2.65860293
  0.92550000   1.70543255
  0.92550000   2.51547549
  0.92550000   2.01670771
  0.92550000   2.65869133
  0.92560000   2.51374361
  0.92560000   2.02085331
  0.92560000   2.65911343
  0.92560000   1.70458056
  0.92560000   2.51586345
  0.92560000   2.01628035
  0.92560000   2.65983298
  0.92560000   1.70301720
  0.92560000   2.51438243
  0.92560000   2.01938993
  0.92560000   2.65931445
  0.92560000   1.70406983
  0.92560000   2.51536614
  0.92560000   2.01726010
  0.92560000   2.65964357
  0.92560000   1.70334715
  0.92560000   2.51467987
  0.92560000   2.01869341
  0.92560000   2.65939970
  0.92560000   1.70383548
  0.92560000   2.51513471
  0.92560000   2.01770156
  0.92560000   2.65954903
  0.92570000   2.51306251
  0.92570000   2.02257304
  0.92570000   2.65981418
  0.92570000   1.70318653
  0.92570000   2.51571118
  0.92570000   2.01687242
  0.92570000   2.66075563
  0.92570000   1.70115473
  0.92570000   2.51378183
  0.92570000   2.02093813
  0.92570000   2.66005887
  0.92570000   1.70258331
  0.92570000   2.51512503
  0.92570000   2.01804200
  0.92570000   2.66053162
  0.92570000   1.70155765
  0.92570000   2.51414977
  0.92570000   2.02009138
  0.92570000   2.66017579
  0.92570000   1.70228205
  0.92570000   2.51482965
  0.92570000   2.01861990
  0.92570000   2.66041244
  0.92580000   2.51238479
  0.92580000   2.02428651
  0.92580000   2.66049826
  0.92580000   1.70182801
  0.92580000   2.51558838
  0.92580000   2.01740193
  0.92580000   2.66168548
  0.92580000   1.69927697
  0.92580000   2.51315913
  0.92580000   2.02253429
  0.92580000   2.66077966
  0.92580000   1.70114684
  0.92580000   2.51492658
  0.92580000   2.01873337
  0.92580000   2.66143027
  0.92580000   1.69974574
  0.92580000   2.51359142
  0.92580000   2.02155038
  0.92580000   2.66092860
  0.92580000   1.70077785
  0.92580000   2.51456607
  0.92580000   2.01945040
  0.92580000   2.66128488
  0.92590000   2.51172666
  0.92590000   2.02595925
  0.92590000   2.66117273
  0.92590000   1.70049006
  0.92590000   2.51548119
  0.92590000   2.01789834
  0.92590000   2.66261836
  0.92590000   1.69739264
  0.92590000   2.51252250
  0.92590000   2.02416104
  0.92590000   2.66147887
  0.92590000   1.69975616
  0.92590000   2.51476728
  0.92590000   2.01934165
  0.92590000   2.66233942
  0.92590000   1.69791158
  0.92590000   2.51300471
  0.92590000   2.02307066
  0.92590000   2.66165654
  0.92590000   1.69932627
  0.92590000   2.51434772
  0.92590000   2.02018494
  0.92590000   2.66216910
  0.92600000   2.51110988
  0.92600000   2.02754483
  0.92600000   2.66184844
  0.92600000   1.69914973
  0.92600000   2.51536795
  0.92600000   2.01840785
  0.92600000   2.66354691
  0.92600000   1.69551726
  0.92600000   2.51188676
  0.92600000   2.02578680
  0.92600000   2.66216201
  0.92600000   1.69839966
  0.92600000   2.51463646
  0.92600000   2.01988942
  0.92600000   2.66325614
  0.92600000   1.69606135
  0.92600000   2.51239531
  0.92600000   2.02464016
  0.92600000   2.66236040
  0.92600000   1.69792573
  0.92600000   2.51417360
  0.92600000   2.02082553
  0.92600000   2.66306604
  0.92610000   2.51056347
  0.92610000   2.02898146
  0.92610000   2.66254117
  0.92610000   1.69777355
  0.92610000   2.51521672
  0.92610000   2.01899870
  0.92610000   2.66445932
  0.92610000   1.69367574
  0.92610000   2.51127605
  0.92610000   2.02736016
  0.92610000   2.66283992
  0.92610000   1.69705445
  0.92610000   2.51451258
  0.92610000   2.02042264
  0.92610000   2.66417291
  0.92610000   1.69421086
  0.92610000   2.51177827
  0.92610000   2.02622687
  0.92610000   2.66304543
  0.92610000   1.69656519
  0.92610000   2.51403363
  0.92610000   2.02139357
  0.92610000   2.66397298
  0.92620000   2.51012570
  0.92620000   2.03018749
  0.92620000   2.66327295
  0.92620000   1.69631482
  0.92620000   2.51498239
  0.92620000   2.01976736
  0.92620000   2.66533768
  0.92620000   1.69190582
  0.92620000   2.51072733
  0.92620000   2.02880231
  0.92620000   2.66353122
  0.92620000   1.69568112
  0.92620000   2.51435792
  0.92620000   2.02102182
  0.92620000   2.66507525
  0.92620000   1.69239065
  0.92620000   2.51118311
  0.92620000   2.02776782
  0.92620000   2.66372464
  0.92620000   1.69521718
  0.92620000   2.51390181
  0.92620000   2.02194447
  0.92620000   2.66488041
  0.92630000   2.50984652
  0.92630000   2.03105630
  0.92630000   2.66407329
  0.92630000   1.69471095
  0.92630000   2.51460396
  0.92630000   2.02084440
  0.92630000   2.66615567
  0.92630000   1.69026302
  0.92630000   2.51029540
  0.92630000   2.02999637
  0.92630000   2.66426553
  0.92630000   1.69421688
  0.92630000   2.51411175
  0.92630000   2.02181678
  0.92630000   2.66593816
  0.92630000   1.69065350
  0.92630000   2.51066145
  0.92630000   2.02915297
  0.92630000   2.66442364
  0.92630000   1.69382748
  0.92630000   2.51372601
  0.92630000   2.02258954
  0.92630000   2.66576734
  0.92640000   2.50978994
  0.92640000   2.03145102
  0.92640000   2.66497973
  0.92640000   1.69288232
  0.92640000   2.51400299
  0.92640000   2.02239781
  0.92640000   2.66687551
  0.92640000   1.68882724
  0.92640000   2.51005950
  0.92640000   2.03077308
  0.92640000   2.66508720
  0.92640000   1.69256772
  0.92640000   2.51368236
  0.92640000   2.02300378
  0.92640000   2.66672078
  0.92640000   1.68908563
  0.92640000   2.51029823
  0.92640000   2.03020099
  0.92640000   2.66518758
  0.92640000   1.69230046
  0.92640000   2.51341336
  0.92640000   2.02352735
  0.92640000   2.66659366
  0.92650000   2.51003552
  0.92650000   2.03120116
  0.92650000   2.66603669
  0.92650000   1.69073492
  0.92650000   2.51308554
  0.92650000   2.02462870
  0.92650000   2.66744419
  0.92650000   1.68771072
  0.92650000   2.51013131
  0.92650000   2.03089372
  0.92650000   2.66605816
  0.92650000   1.69060248
  0.92650000   2.51294040
  0.92650000   2.02485965
  0.92650000   2.66735881
  0.92650000   1.68782304
  0.92650000   2.51022808
  0.92650000   2.03062430
  0.92650000   2.66608960
  0.92650000   1.69048118
  0.92650000   2.51281206
  0.92650000   2.02508271
  0.92650000   2.66728809
  0.92660000   2.51067722
  0.92660000   2.03010475
  0.92660000   2.66729067
  0.92660000   1.68817063
  0.92660000   2.51175133
  0.92660000   2.02775138
  0.92660000   2.66779064
  0.92660000   1.68706447
  0.92660000   2.51066100
  0.92660000   2.03003637
  0.92660000   2.66725614
  0.92660000   1.68815680
  0.92660000   2.51172137
  0.92660000   2.02773617
  0.92660000   2.66775523
  0.92660000   1.68707140
  0.92660000   2.51065486
  0.92660000   2.02998659
  0.92660000   2.66723646
  0.92660000   1.68814373
  0.92660000   2.51169813
  0.92660000   2.02773465
  0.92660000   2.66773025
  0.92670000   2.51181677
  0.92670000   2.02794187
  0.92670000   2.66877978
  0.92670000   1.68510973
  0.92670000   2.50991513
  0.92670000   2.03194729
  0.92670000   2.66782753
  0.92670000   1.68707480
  0.92670000   2.51183306
  0.92670000   2.02780401
  0.92670000   2.66876018
  0.92670000   1.68506444
  0.92670000   2.50985430
  0.92670000   2.03199804
  0.92670000   2.66777617
  0.92670000   1.68711558
  0.92670000   2.51186003
  0.92670000   2.02768346
  0.92670000   2.66875575
  0.92670000   1.68501921
  0.92670000   2.50979946
  0.92670000   2.03206403
  0.92670000   2.66773468
  0.92680000   2.51354837
  0.92680000   2.02450686
  0.92680000   2.67051646
  0.92680000   1.68152779
  0.92680000   2.50754303
  0.92680000   2.03728696
  0.92680000   2.66746593
  0.92680000   1.68793268
  0.92680000   2.51383431
  0.92680000   2.02379141
  0.92680000   2.67061262
  0.92680000   1.68123850
  0.92680000   2.50724031
  0.92680000   2.03785385
  0.92680000   2.66727367
  0.92680000   1.68827246
  0.92680000   2.51415314
  0.92680000   2.02304553
  0.92680000   2.67073136
  0.92680000   1.68093375
  0.92680000   2.50692795
  0.92680000   2.03846917
  0.92680000   2.66708026
  0.92690000   2.51593253
  0.92690000   2.01966404
  0.92690000   2.67246655
  0.92690000   1.67750003
  0.92690000   2.50469851
  0.92690000   2.04363199
  0.92690000   2.66665266
  0.92690000   1.68975457
  0.92690000   2.51677373
  0.92690000   2.01775557
  0.92690000   2.67275846
  0.92690000   1.67680021
  0.92690000   2.50398307
  0.92690000   2.04507767
  0.92690000   2.66617321
  0.92690000   1.69070563
  0.92690000   2.51768519
  0.92690000   2.01573548
  0.92690000   2.67307020
  0.92690000   1.67609144
  0.92690000   2.50326350
  0.92690000   2.04655944
  0.92690000   2.66568586
  0.92700000   2.51896079
  0.92700000   2.01342375
  0.92700000   2.67453491
  0.92700000   1.67323123
  0.92700000   2.50157702
  0.92700000   2.05056260
  0.92700000   2.66542959
  0.92700000   1.69245542
  0.92700000   2.52055801
  0.92700000   2.00988438
  0.92700000   2.67500312
  0.92700000   1.67216634
  0.92700000   2.50048710
  0.92700000   2.05280298
  0.92700000   2.66462393
  0.92700000   1.69410360
  0.92700000   2.52213634
  0.92700000   2.00642292
  0.92700000   2.67542115
  0.92700000   1.67124111
  0.92700000   2.49954202
  0.92700000   2.05476190
  0.92700000   2.66390784
  0.92710000   2.52252050
  0.92710000   2.00602012
  0.92710000   2.67657362
  0.92710000   1.66903685
  0.92710000   2.49849332
  0.92710000   2.05740726
  0.92710000   2.66398260
  0.92710000   1.69564217
  0.92710000   2.52479444
  0.92710000   2.00101223
  0.92710000   2.67706873
  0.92710000   1.66792582
  0.92710000   2.49734760
  0.92710000   2.05976337
  0.92710000   2.66305278
  0.92710000   1.69755881
  0.92710000   2.52661812
  0.92710000   1.99701165
  0.92710000   2.67738848
  0.92710000   1.66721536
  0.92710000   2.49661385
  0.92710000   2.06127126
  0.92710000   2.66244241
  0.92720000   2.52637636
  0.92720000   1.99795412
  0.92720000   2.67842421
  0.92720000   1.66525192
  0.92720000   2.49579303
  0.92720000   2.06343278
  0.92720000   2.66261560
  0.92720000   1.69866659
  0.92720000   2.52885473
  0.92720000   1.99249200
  0.92720000   2.67876205
  0.92720000   1.66448102
  0.92720000   2.49498805
  0.92720000   2.06506384
  0.92720000   2.66191033
  0.92720000   1.70010642
  0.92720000   2.53021256
  0.92720000   1.98949044
  0.92720000   2.67888586
  0.92720000   1.66418266
  0.92720000   2.49467251
  0.92720000   2.06568345
  0.92720000   2.66162735
  0.92730000   2.53018837
  0.92730000   1.98995850
  0.92730000   2.67998270
  0.92730000   1.66209243
  0.92730000   2.49370854
  0.92730000   2.06814938
  0.92730000   2.66161484
  0.92730000   1.70091436
  0.92730000   2.53215922
  0.92730000   1.98558464
  0.92730000   2.68009758
  0.92730000   1.66179055
  0.92730000   2.49338262
  0.92730000   2.06876371
  0.92730000   2.66130893
  0.92730000   1.70150125
  0.92730000   2.53270235
  0.92730000   1.98434429
  0.92730000   2.68009925
  0.92730000   1.66174078
  0.92730000   2.49332177
  0.92730000   2.06884259
  0.92730000   2.66124718
  0.92740000   2.53357748
  0.92740000   1.98285775
  0.92740000   2.68124875
  0.92740000   1.65955218
  0.92740000   2.49224552
  0.92740000   2.07154804
  0.92740000   2.66108202
  0.92740000   1.70216423
  0.92740000   2.53450994
  0.92740000   1.98073073
  0.92740000   2.68122556
  0.92740000   1.65952948
  0.92740000   2.49220719
  0.92740000   2.07155197
  0.92740000   2.66103758
  0.92740000   1.70219150
  0.92740000   2.53452222
  0.92740000   1.98064137
  0.92740000   2.68119859
  0.92740000   1.65953282
  0.92740000   2.49220105
  0.92740000   2.07151438
  0.92740000   2.66102628
  0.92750000   2.53623006
  0.92750000   1.97734010
  0.92750000   2.68231748
  0.92750000   1.65742259
  0.92750000   2.49119657
  0.92750000   2.07406951
  0.92750000   2.66088745
  0.92750000   1.70269122
  0.92750000   2.53617502
  0.92750000   1.97735720
  0.92750000   2.68227377
  0.92750000   1.65742874
  0.92750000   2.49118797
  0.92750000   2.07400943
  0.92750000   2.66087188
  0.92750000   1.70265645
  0.92750000   2.53612857
  0.92750000   1.97739539
  0.92750000   2.68224691
  0.92750000   1.65743096
  0.92750000   2.49118071
  0.92750000   2.07397417
  0.92750000   2.66085983
  0.92760000   2.53801035
  0.92760000   1.97370937
  0.92760000   2.68331332
  0.92760000   1.65543572
  0.92760000   2.49028724
  0.92760000   2.07629525
  0.92760000   2.66079383
  0.92760000   1.70300252
  0.92760000   2.53763623
  0.92760000   1.97442105
  0.92760000   2.68328650
  0.92760000   1.65540104
  0.92760000   2.49023600
  0.92760000   2.07632513
  0.92760000   2.66073612
  0.92760000   1.70305802
  0.92760000   2.53767503
  0.92760000   1.97427378
  0.92760000   2.68325621
  0.92760000   1.65541186
  0.92760000   2.49023781
  0.92760000   2.07627079
  0.92760000   2.66073343
  0.92770000   2.53903832
  0.92770000   1.97171131
  0.92770000   2.68431660
  0.92770000   1.65342202
  0.92770000   2.48934156
  0.92770000   2.07859807
  0.92770000   2.66063142
  0.92770000   1.70346182
  0.92770000   2.53923728
  0.92770000   1.97117491
  0.92770000   2.68425478
  0.92770000   1.65347059
  0.92770000   2.48937771
  0.92770000   2.07844355
  0.92770000   2.66066284
  0.92770000   1.70332637
  0.92770000   2.53909584
  0.92770000   1.97142037
  0.92770000   2.68423658
  0.92770000   1.65345298
  0.92770000   2.48934976
  0.92770000   2.07845206
  0.92770000   2.66063011
  0.92780000   2.53969823
  0.92780000   1.97051264
  0.92780000   2.68533730
  0.92780000   1.65136607
  0.92780000   2.48834313
  0.92780000   2.08101310
  0.92780000   2.66037967
  0.92780000   1.70411357
  0.92780000   2.54101962
  0.92780000   1.96752743
  0.92780000   2.68516127
  0.92780000   1.65167494
  0.92780000   2.48865379
  0.92780000   2.08027857
  0.92780000   2.66070191
  0.92780000   1.70335431
  0.92780000   2.54029005
  0.92780000   1.96905630
  0.92780000   2.68520767
  0.92780000   1.65151089
  0.92780000   2.48847156
  0.92780000   2.08061317
  0.92780000   2.66050671
  0.92790000   2.54056446
  0.92790000   1.96886172
  0.92790000   2.68633424
  0.92790000   1.64936439
  0.92790000   2.48739358
  0.92790000   2.08332573
  0.92790000   2.66014425
  0.92790000   1.70473128
  0.92790000   2.54276945
  0.92790000   1.96394442
  0.92790000   2.68601887
  0.92790000   1.64998330
  0.92790000   2.48803315
  0.92790000   2.08189576
  0.92790000   2.66082917
  0.92790000   1.70319333
  0.92790000   2.54130629
  0.92790000   1.96707689
  0.92790000   2.68617843
  0.92790000   1.64956727
  0.92790000   2.48758411
  0.92790000   2.08279462
  0.92790000   2.66034321
  0.92800000   2.54225046
  0.92800000   1.96541726
  0.92800000   2.68722341
  0.92800000   1.64760500
  0.92800000   2.48669318
  0.92800000   2.08511274
  0.92800000   2.66015131
  0.92800000   1.70482915
  0.92800000   2.54403020
  0.92800000   1.96142452
  0.92800000   2.68690967
  0.92800000   1.64821388
  0.92800000   2.48732427
  0.92800000   2.08370025
  0.92800000   2.66084193
  0.92800000   1.70327827
  0.92800000   2.54255506
  0.92800000   1.96458622
  0.92800000   2.68710387
  0.92800000   1.64772411
  0.92800000   2.48679564
  0.92800000   2.08476769
  0.92800000   2.66025842
  0.92810000   2.54518052
  0.92810000   1.95924495
  0.92810000   2.68784811
  0.92810000   1.64642757
  0.92810000   2.48660568
  0.92810000   2.08560410
  0.92810000   2.66082514
  0.92810000   1.70349500
  0.92810000   2.54394225
  0.92810000   1.96185145
  0.92810000   2.68801432
  0.92810000   1.64596940
  0.92810000   2.48610373
  0.92810000   2.08658781
  0.92810000   2.66025897
  0.92810000   1.70464321
  0.92810000   2.54501060
  0.92810000   1.95945140
  0.92810000   2.68779774
  0.92810000   1.64639243
  0.92810000   2.48654449
  0.92810000   2.08560516
  0.92810000   2.66075108
  0.92820000   2.54925802
  0.92820000   1.95054467
  0.92820000   2.68801587
  0.92820000   1.64624002
  0.92820000   2.48756921
  0.92820000   2.08386851
  0.92820000   2.66266720
  0.92820000   1.69965204
  0.92820000   2.54146786
  0.92820000   1.96749864
  0.92820000   2.68942803
  0.92820000   1.64303248
  0.92820000   2.48413259
  0.92820000   2.09106169
  0.92820000   2.65874768
  0.92820000   1.70800635
  0.92820000   2.54933203
  0.92820000   1.95021708
  0.92820000   2.68790886
  0.92820000   1.64632926
  0.92820000   2.48764030
  0.92820000   2.08358944
  0.92820000   2.66273897
  0.92830000   2.55341801
  0.92830000   1.94164296
  0.92830000   2.68783326
  0.92830000   1.64679966
  0.92830000   2.48932736
  0.92830000   2.08044078
  0.92830000   2.66535829
  0.92830000   1.69398985
  0.92830000   2.53720754
  0.92830000   1.97704806
  0.92830000   2.69073450
  0.92830000   1.64029845
  0.92830000   2.48236208
  0.92830000   2.09510819
  0.92830000   2.65736848
  0.92830000   1.71109011
  0.92830000   2.55336918
  0.92830000   1.94158479
  0.92830000   2.68775902
  0.92830000   1.64681736
  0.92830000   2.48932229
  0.92830000   2.08032310
  0.92830000   2.66534488
  0.92840000   2.55520654
  0.92840000   1.93793588
  0.92840000   2.68829768
  0.92840000   1.64594559
  0.92840000   2.48958221
  0.92840000   2.08019979
  0.92840000   2.66641831
  0.92840000   1.69182684
  0.92840000   2.53628360
  0.92840000   1.97930820
  0.92840000   2.69178634
  0.92840000   1.63815686
  0.92840000   2.48121718
  0.92840000   2.09783584
  0.92840000   2.65668321
  0.92840000   1.71268330
  0.92840000   2.55601230
  0.92840000   1.93599972
  0.92840000   2.68788386
  0.92840000   1.64669977
  0.92840000   2.49036071
  0.92840000   2.07841632
  0.92840000   2.66723670
  0.92850000   2.55083744
  0.92850000   1.94775960
  0.92850000   2.69090901
  0.92850000   1.64043092
  0.92850000   2.48484512
  0.92850000   2.09055630
  0.92850000   2.66184800
  0.92850000   1.70174890
  0.92850000   2.54696997
  0.92850000   1.95614940
  0.92850000   2.69183015
  0.92850000   1.63833099
  0.92850000   2.48256897
  0.92850000   2.09529716
  0.92850000   2.65909666
  0.92850000   1.70760176
  0.92850000   2.55246516
  0.92850000   1.94402087
  0.92850000   2.69031597
  0.92850000   1.64157839
  0.92850000   2.48605427
  0.92850000   2.08786552
  0.92850000   2.66325884
  0.92860000   2.53654382
  0.92860000   1.97932205
  0.92860000   2.69394251
  0.92860000   1.63387980
  0.92860000   2.47892138
  0.92860000   2.10338454
  0.92860000   2.65516214
  0.92860000   1.71626833
  0.92860000   2.56166073
  0.92860000   1.92406545
  0.92860000   2.68760632
  0.92860000   1.64764710
  0.92860000   2.49370427
  0.92860000   2.07193599
  0.92860000   2.67226496
  0.92860000   1.67946224
  0.92860000   2.52644578
  0.92860000   2.00119780
  0.92860000   2.69252690
  0.92860000   1.63659615
  0.92860000   2.48184192
  0.92860000   2.09707208
  0.92860000   2.65893272
  0.92870000   2.51225379
  0.92870000   2.03241815
  0.92870000   2.68771221
  0.92870000   1.64686975
  0.92870000   2.49404315
  0.92870000   2.07152805
  0.92870000   2.67343212
  0.92870000   1.67712612
  0.92870000   2.52529027
  0.92870000   2.00402375
  0.92870000   2.69324644
  0.92870000   1.63520807
  0.92870000   2.48150782
  0.92870000   2.09813517
  0.92870000   2.65924068
  0.92870000   1.70751541
  0.92870000   2.55472587
  0.92870000   1.93949302
  0.92870000   2.69177833
  0.92870000   1.63871594
  0.92870000   2.48530055
  0.92870000   2.09007441
  0.92870000   2.66389273
  0.92880000   2.48660464
  0.92880000   2.08775167
  0.92880000   2.66620048
  0.92880000   1.69277087
  0.92880000   2.54188725
  0.92880000   1.96803903
  0.92880000   2.69587438
  0.92880000   1.63002679
  0.92880000   2.47703367
  0.92880000   2.10795998
  0.92880000   2.65401812
  0.92880000   1.71894290
  0.92880000   2.56643306
  0.92880000   1.91393091
  0.92880000   2.68723139
  0.92880000   1.64870705
  0.92880000   2.49715324
  0.92880000   2.06511714
  0.92880000   2.67721635
  0.92880000   1.66908167
  0.92880000   2.51831337
  0.92880000   2.01937349
  0.92880000   2.69169177
  0.92890000   1.62749543
  0.92890000   2.47543534
  0.92890000   2.11174791
  0.92890000   2.65246324
  0.92890000   1.72251450
  0.92890000   2.57085045
  0.92890000   1.90445976
  0.92890000   2.68559325
  0.92890000   1.65244692
  0.92890000   2.50228190
  0.92890000   2.05445612
  0.92890000   2.68254274
  0.92890000   1.65791294
  0.92890000   2.50798183
  0.92890000   2.04206714
  0.92890000   2.68682065
  0.92890000   1.64881391
  0.92890000   2.49841523
  0.92890000   2.06263546
  0.92890000   2.67921887
  0.92890000   1.66490317
  0.92890000   2.51520345
  0.92890000   2.02637949
  0.92890000   2.69115092
  0.92900000   1.63685699
  0.92900000   2.48681575
  0.92900000   2.08795392
  0.92900000   2.66795899
  0.92900000   1.68922874
  0.92900000   2.54078632
  0.92900000   1.97093327
  0.92900000   2.69810276
  0.92900000   1.62550407
  0.92900000   2.47438546
  0.92900000   2.11418189
  0.92900000   2.65163867
  0.92900000   1.72433629
  0.92900000   2.57363877
  0.92900000   1.89842066
  0.92900000   2.68472666
  0.92900000   1.65438457
  0.92900000   2.50547371
  0.92900000   2.04780135
  0.92900000   2.68590452
  0.92900000   1.65083382
  0.92900000   2.50171407
  0.92900000   2.05581165
  0.92900000   2.68293351
  0.92910000   1.65551180
  0.92910000   2.50785454
  0.92910000   2.04310416
  0.92910000   2.68855147
  0.92910000   1.64547225
  0.92910000   2.49721462
  0.92910000   2.06590144
  0.92910000   2.67979331
  0.92910000   1.66397487
  0.92910000   2.51660158
  0.92910000   2.02396281
  0.92910000   2.69377664
  0.92910000   1.63438019
  0.92910000   2.48525539
  0.92910000   2.09139549
  0.92910000   2.66686003
  0.92910000   1.69157032
  0.92910000   2.54421435
  0.92910000   1.96352686
  0.92910000   2.69882055
  0.92910000   1.62404817
  0.92910000   2.47392367
  0.92910000   2.11539247
  0.92910000   2.65163904
  0.92920000   1.66055445
  0.92920000   2.51427993
  0.92920000   2.02946329
  0.92920000   2.69351684
  0.92920000   1.63511170
  0.92920000   2.48722913
  0.92920000   2.08757671
  0.92920000   2.66998060
  0.92920000   1.68505257
  0.92920000   2.53902164
  0.92920000   1.97523599
  0.92920000   2.70026963
  0.92920000   1.62106599
  0.92920000   2.47178554
  0.92920000   2.12026635
  0.92920000   2.64909864
  0.92920000   1.73006069
  0.92920000   2.58105874
  0.92920000   1.88236393
  0.92920000   2.68107582
  0.92920000   1.66251145
  0.92920000   2.51626961
  0.92920000   2.02495543
  0.92920000   2.69453493
  0.92930000   1.63951854
  0.92930000   2.49318568
  0.92930000   2.07524524
  0.92930000   2.67739651
  0.92930000   1.66934971
  0.92930000   2.52445753
  0.92930000   2.00742163
  0.92930000   2.69897867
  0.92930000   1.62372166
  0.92930000   2.47589420
  0.92930000   2.11192842
  0.92930000   2.65585083
  0.92930000   1.71557625
  0.92930000   2.56922895
  0.92930000   1.90879445
  0.92930000   2.69134471
  0.92930000   1.64052616
  0.92930000   2.49424078
  0.92930000   2.07281808
  0.92930000   2.67848073
  0.92930000   1.66689600
  0.92930000   2.52192454
  0.92930000   2.01281887
  0.92930000   2.69803263
  0.92940000   1.61678701
  0.92940000   2.46935672
  0.92940000   2.12616560
  0.92940000   2.64657725
  0.92940000   1.73590907
  0.92940000   2.58853736
  0.92940000   1.86627546
  0.92940000   2.67649872
  0.92940000   1.67277451
  0.92940000   2.52912860
  0.92940000   1.99752012
  0.92940000   2.70127479
  0.92940000   1.61902867
  0.92940000   2.47183752
  0.92940000   2.12079969
  0.92940000   2.65047513
  0.92940000   1.72732525
  0.92940000   2.58099045
  0.92940000   1.88291037
  0.92940000   2.68355789
  0.92940000   1.65741770
  0.92940000   2.51331681
  0.92940000   2.03190476
  0.92940000   2.69478138
  0.92950000   1.65190028
  0.92950000   2.50870730
  0.92950000   2.04227515
  0.92950000   2.69275141
  0.92950000   1.63695540
  0.92950000   2.49271807
  0.92950000   2.07670994
  0.92950000   2.67850861
  0.92950000   1.66711637
  0.92950000   2.52450523
  0.92950000   2.00777569
  0.92950000   2.70095844
  0.92950000   1.61970423
  0.92950000   2.47374749
  0.92950000   2.11706723
  0.92950000   2.65403491
  0.92950000   1.71971918
  0.92950000   2.57534502
  0.92950000   1.89562369
  0.92950000   2.68938334
  0.92950000   1.64498957
  0.92950000   2.50135613
  0.92950000   2.05806691
  0.92950000   2.68690461
  0.92960000   1.73316351
  0.92960000   2.58851654
  0.92960000   1.86676171
  0.92960000   2.67902314
  0.92960000   1.66762528
  0.92960000   2.52623745
  0.92960000   2.00439561
  0.92960000   2.70253203
  0.92960000   1.61657618
  0.92960000   2.47142204
  0.92960000   2.12235100
  0.92960000   2.65111619
  0.92960000   1.72621198
  0.92960000   2.58235769
  0.92960000   1.88029632
  0.92960000   2.68479103
  0.92960000   1.65504522
  0.92960000   2.51317669
  0.92960000   2.03277098
  0.92960000   2.69655582
  0.92960000   1.62893339
  0.92960000   2.48511186
  0.92960000   2.09317648
  0.92960000   2.67041176
  0.92970000   1.70636448
  0.92970000   2.56542212
  0.92970000   1.91821122
  0.92970000   2.69840838
  0.92970000   1.62601214
  0.92970000   2.48309287
  0.92970000   2.09796912
  0.92970000   2.66854008
  0.92970000   1.68871106
  0.92970000   2.54847984
  0.92970000   1.95558621
  0.92970000   2.70473128
  0.92970000   1.61231139
  0.92970000   2.46778543
  0.92970000   2.13032625
  0.92970000   2.64590392
  0.92970000   1.73764321
  0.92970000   2.59353262
  0.92970000   1.85564386
  0.92970000   2.67483125
  0.92970000   1.67669730
  0.92970000   2.53658598
  0.92970000   1.98182007
  0.92970000   2.70545336
  0.92980000   1.60823413
  0.92980000   2.46435635
  0.92980000   2.13801395
  0.92980000   2.64068464
  0.92980000   1.74927743
  0.92980000   2.60457149
  0.92980000   1.83141813
  0.92980000   2.66297789
  0.92980000   1.70272078
  0.92980000   2.56318868
  0.92980000   1.92340518
  0.92980000   2.70074536
  0.92980000   1.62108367
  0.92980000   2.47878157
  0.92980000   2.10739607
  0.92980000   2.66338265
  0.92980000   1.69987683
  0.92980000   2.56042576
  0.92980000   1.92933107
  0.92980000   2.70197356
  0.92980000   1.61836155
  0.92980000   2.47573352
  0.92980000   2.11380627
  0.92980000   2.65897974
  0.92990000   1.81528520
  0.92990000   2.65439323
  0.92990000   1.72177304
  0.92990000   2.58200429
  0.92990000   1.88195361
  0.92990000   2.68892326
  0.92990000   1.64667764
  0.92990000   2.50785610
  0.92990000   2.04525446
  0.92990000   2.69569150
  0.92990000   1.63109303
  0.92990000   2.49098564
  0.92990000   2.08156571
  0.92990000   2.67973771
  0.92990000   1.66486616
  0.92990000   2.52687088
  0.92990000   2.00357067
  0.92990000   2.70567990
  0.92990000   1.61015752
  0.92990000   2.46765990
  0.92990000   2.13118206
  0.92990000   2.64693013
  0.92990000   1.73562477
  0.92990000   2.59413313
  0.93000000   2.12201710
  0.93000000   2.65497747
  0.93000000   1.71845493
  0.93000000   2.58011118
  0.93000000   1.88618369
  0.93000000   2.69166482
  0.93000000   1.64085998
  0.93000000   2.50278412
  0.93000000   2.05650547
  0.93000000   2.69244538
  0.93000000   1.63801455
  0.93000000   2.49968480
  0.93000000   2.06309406
  0.93000000   2.68963188
  0.93000000   1.64391405
  0.93000000   2.50602952
  0.93000000   2.04930898
  0.93000000   2.69515881
  0.93000000   1.63220831
  0.93000000   2.49335687
  0.93000000   2.07668326
  0.93000000   2.68317401
  0.93000000   1.65757958
  0.93000000   2.52047598
  0.93010000   2.06512952
  0.93010000   2.68977581
  0.93010000   1.64383710
  0.93010000   2.50713796
  0.93010000   2.04729738
  0.93010000   2.69693263
  0.93010000   1.62866583
  0.93010000   2.49065488
  0.93010000   2.08288612
  0.93010000   2.68091462
  0.93010000   1.66258240
  0.93010000   2.52686210
  0.93010000   2.00411637
  0.93010000   2.70768106
  0.93010000   1.60617186
  0.93010000   2.46545603
  0.93010000   2.13650425
  0.93010000   2.64437975
  0.93010000   1.74146087
  0.93010000   2.60149831
  0.93010000   1.83865042
  0.93010000   2.67051335
  0.93010000   1.68659846
  0.93010000   2.55112724
  0.93020000   1.84589034
  0.93020000   2.67565236
  0.93020000   1.67575363
  0.93020000   2.54153895
  0.93020000   1.97226368
  0.93020000   2.71095118
  0.93020000   1.59973055
  0.93020000   2.45925784
  0.93020000   2.14996936
  0.93020000   2.63375660
  0.93020000   1.76490018
  0.93020000   2.62188135
  0.93020000   1.79360881
  0.93020000   2.64334004
  0.93020000   1.74630316
  0.93020000   2.60684744
  0.93020000   1.82713576
  0.93020000   2.66509558
  0.93020000   1.69860900
  0.93020000   2.56396932
  0.93020000   1.92247079
  0.93020000   2.70493967
  0.93020000   1.61259824
  0.93020000   2.47390983
  0.93030000   1.79295152
  0.93030000   2.64408829
  0.93030000   1.74493528
  0.93030000   2.60690601
  0.93030000   1.82729760
  0.93030000   2.66638621
  0.93030000   1.69603216
  0.93030000   2.56269365
  0.93030000   1.92561032
  0.93030000   2.70677953
  0.93030000   1.60888452
  0.93030000   2.47087938
  0.93030000   2.12578271
  0.93030000   2.65466553
  0.93030000   1.71936884
  0.93030000   2.58444471
  0.93030000   1.87700870
  0.93030000   2.69140116
  0.93030000   1.64171283
  0.93030000   2.50719173
  0.93030000   2.04768374
  0.93030000   2.69870784
  0.93030000   1.62501717
  0.93030000   2.48894147
  0.93040000   1.94364960
  0.93040000   2.71105595
  0.93040000   1.59992947
  0.93040000   2.46181155
  0.93040000   2.14532406
  0.93040000   2.63955746
  0.93040000   1.75250704
  0.93040000   2.61428412
  0.93040000   1.81084086
  0.93040000   2.65731124
  0.93040000   1.71592194
  0.93040000   2.58254695
  0.93040000   1.88160565
  0.93040000   2.69442418
  0.93040000   1.63540965
  0.93040000   2.50154535
  0.93040000   2.06026338
  0.93040000   2.69472394
  0.93040000   1.63352686
  0.93040000   2.49946624
  0.93040000   2.06465225
  0.93040000   2.69275490
  0.93040000   1.63764220
  0.93040000   2.50393649
  0.93050000   2.13707947
  0.93050000   2.64744597
  0.93050000   1.73544743
  0.93050000   2.60108242
  0.93050000   1.84043311
  0.93050000   2.67616136
  0.93050000   1.67498339
  0.93050000   2.54427716
  0.93050000   1.96686299
  0.93050000   2.71403723
  0.93050000   1.59356824
  0.93050000   2.45560183
  0.93050000   2.15861452
  0.93050000   2.62829386
  0.93050000   1.77727843
  0.93050000   2.63490424
  0.93050000   1.76520433
  0.93050000   2.62571063
  0.93050000   1.78570273
  0.93050000   2.64121592
  0.93050000   1.75142726
  0.93050000   2.61463427
  0.93050000   1.81031910
  0.93050000   2.65813602
  0.93060000   2.11570817
  0.93060000   2.66488421
  0.93060000   1.69769979
  0.93060000   2.56778541
  0.93060000   1.91481275
  0.93060000   2.70754453
  0.93060000   1.60765595
  0.93060000   2.47297037
  0.93060000   2.12232407
  0.93060000   2.65993875
  0.93060000   1.70831022
  0.93060000   2.57780650
  0.93060000   1.89240517
  0.93060000   2.70068572
  0.93060000   1.62221733
  0.93060000   2.48935333
  0.93060000   2.08718097
  0.93060000   2.68317305
  0.93060000   1.65824294
  0.93060000   2.52820677
  0.93060000   2.00236890
  0.93060000   2.71307884
  0.93060000   1.59533147
  0.93060000   2.45878724
  0.93070000   1.90196692
  0.93070000   2.70505436
  0.93070000   1.61318757
  0.93070000   2.48041794
  0.93070000   2.10680873
  0.93070000   2.67194854
  0.93070000   1.68252472
  0.93070000   2.55414231
  0.93070000   1.94532328
  0.93070000   2.71450565
  0.93070000   1.59290986
  0.93070000   2.45715173
  0.93070000   2.15604752
  0.93070000   2.63234284
  0.93070000   1.76866331
  0.93070000   2.63068588
  0.93070000   1.77485270
  0.93070000   2.63550684
  0.93070000   1.76431943
  0.93070000   2.62737982
  0.93070000   1.78234508
  0.93070000   2.64111332
  0.93070000   1.75195637
  0.93070000   2.61742597
  0.93080000   1.71519512
  0.93080000   2.58662996
  0.93080000   1.87341149
  0.93080000   2.69567094
  0.93080000   1.63335355
  0.93080000   2.50399608
  0.93080000   2.05615917
  0.93080000   2.70037795
  0.93080000   1.62206890
  0.93080000   2.49151389
  0.93080000   2.08309264
  0.93080000   2.68734389
  0.93080000   1.64958734
  0.93080000   2.52144529
  0.93080000   2.01778600
  0.93080000   2.71238801
  0.93080000   1.59691569
  0.93080000   2.46294278
  0.93080000   2.14410456
  0.93080000   2.64389660
  0.93080000   1.74342137
  0.93080000   2.61140136
  0.93080000   1.81782209
  0.93080000   2.66637582
  0.93090000   1.64386313
  0.93090000   2.51656241
  0.93090000   2.02901883
  0.93090000   2.71072222
  0.93090000   1.60058074
  0.93090000   2.46835075
  0.93090000   2.13308761
  0.93090000   2.65410700
  0.93090000   1.72135999
  0.93090000   2.59332723
  0.93090000   1.85838109
  0.93090000   2.68996509
  0.93090000   1.64560629
  0.93090000   2.51840310
  0.93090000   2.02483728
  0.93090000   2.71176086
  0.93090000   1.59831391
  0.93090000   2.46572019
  0.93090000   2.13856528
  0.93090000   2.64949766
  0.93090000   1.73131698
  0.93090000   2.60216209
  0.93090000   1.83858742
  0.93090000   2.67973126
  0.93100000   1.65163236
  0.93100000   2.52601861
  0.93100000   2.00849085
  0.93100000   2.71635746
  0.93100000   1.58902293
  0.93100000   2.45609701
  0.93100000   2.15932495
  0.93100000   2.63175938
  0.93100000   1.77041752
  0.93100000   2.63558154
  0.93100000   1.76451670
  0.93100000   2.63106713
  0.93100000   1.77465778
  0.93100000   2.63891032
  0.93100000   1.75731024
  0.93100000   2.62533469
  0.93100000   1.78740031
  0.93100000   2.64832102
  0.93100000   1.73652885
  0.93100000   2.60796269
  0.93100000   1.82604216
  0.93100000   2.67373851
  0.93100000   1.68084506
  0.93100000   2.55602979
  0.93110000   1.75324578
  0.93110000   2.62324866
  0.93110000   1.79234178
  0.93110000   2.65304922
  0.93110000   1.72639071
  0.93110000   2.60028226
  0.93110000   1.84346190
  0.93110000   2.68475703
  0.93110000   1.65718705
  0.93110000   2.53302724
  0.93110000   1.99318828
  0.93110000   2.71946374
  0.93110000   1.58267893
  0.93110000   2.44978760
  0.93110000   2.17283727
  0.93110000   2.61916850
  0.93110000   1.79825673
  0.93110000   2.65698965
  0.93110000   1.71738089
  0.93110000   2.59211387
  0.93110000   1.86151569
  0.93110000   2.69374066
  0.93110000   1.63770978
  0.93110000   2.51222727
  0.93120000   1.98285380
  0.93120000   2.72135989
  0.93120000   1.57900074
  0.93120000   2.44660489
  0.93120000   2.17993097
  0.93120000   2.61263010
  0.93120000   1.81294965
  0.93120000   2.66789011
  0.93120000   1.69371836
  0.93120000   2.57104515
  0.93120000   1.90882014
  0.93120000   2.71262944
  0.93120000   1.59759595
  0.93120000   2.46838743
  0.93120000   2.13396145
  0.93120000   2.65594127
  0.93120000   1.71768452
  0.93120000   2.59352385
  0.93120000   1.85843978
  0.93120000   2.69342362
  0.93120000   1.63849972
  0.93120000   2.51425553
  0.93120000   2.03468316
  0.93120000   2.71198134
  0.93130000   2.17598339
  0.93130000   2.61761784
  0.93130000   1.80212476
  0.93130000   2.66199167
  0.93130000   1.70680555
  0.93130000   2.58471607
  0.93130000   1.87852806
  0.93130000   2.70345282
  0.93130000   1.61727215
  0.93130000   2.49200069
  0.93130000   2.08359018
  0.93130000   2.69176425
  0.93130000   1.64071407
  0.93130000   2.51780709
  0.93130000   2.02708955
  0.93130000   2.71518311
  0.93130000   1.59152250
  0.93130000   2.46247375
  0.93130000   2.14675302
  0.93130000   2.64577152
  0.93130000   1.73997402
  0.93130000   2.61437265
  0.93130000   1.81204620
  0.93130000   2.66856380
  0.93140000   2.08675027
  0.93140000   2.69094011
  0.93140000   1.64264945
  0.93140000   2.52108318
  0.93140000   2.02022467
  0.93140000   2.71798620
  0.93140000   1.58589501
  0.93140000   2.45705117
  0.93140000   2.15863053
  0.93140000   2.63567785
  0.93140000   1.76232688
  0.93140000   2.63396999
  0.93140000   1.76867742
  0.93140000   2.63902313
  0.93140000   1.75762230
  0.93140000   2.63029888
  0.93140000   1.77699179
  0.93140000   2.64537469
  0.93140000   1.74360363
  0.93140000   2.61872862
  0.93140000   1.80272386
  0.93140000   2.66365642
  0.93140000   1.70338390
  0.93140000   2.58266505
  0.93150000   1.78982082
  0.93150000   2.65594648
  0.93150000   1.72055580
  0.93150000   2.59977291
  0.93150000   1.84531664
  0.93150000   2.69036747
  0.93150000   1.64560404
  0.93150000   2.52545752
  0.93150000   2.01092393
  0.93150000   2.72102037
  0.93150000   1.57974208
  0.93150000   2.45093771
  0.93150000   2.17182562
  0.93150000   2.62340547
  0.93150000   1.78950427
  0.93150000   2.65557760
  0.93150000   1.72105590
  0.93150000   2.60017996
  0.93150000   1.84423826
  0.93150000   2.68975264
  0.93150000   1.64680334
  0.93150000   2.52671996
  0.93150000   2.00802515
  0.93150000   2.72150472
  0.93160000   1.64863209
  0.93160000   2.52986561
  0.93160000   2.00143483
  0.93160000   2.72367575
  0.93160000   1.57442779
  0.93160000   2.44577267
  0.93160000   2.18303970
  0.93160000   2.61240194
  0.93160000   1.81405036
  0.93160000   2.67325094
  0.93160000   1.68253283
  0.93160000   2.56478279
  0.93160000   1.92361525
  0.93160000   2.72073090
  0.93160000   1.58096553
  0.93160000   2.45354590
  0.93160000   2.16669068
  0.93160000   2.62939784
  0.93160000   1.77639847
  0.93160000   2.64716913
  0.93160000   1.73970890
  0.93160000   2.61775859
  0.93160000   1.80514483
  0.93160000   2.66759873
  0.93170000   1.73186995
  0.93170000   2.61220414
  0.93170000   1.81788488
  0.93170000   2.67698369
  0.93170000   1.67483011
  0.93170000   2.55826859
  0.93170000   1.93850249
  0.93170000   2.72456433
  0.93170000   1.57308368
  0.93170000   2.44532153
  0.93170000   2.18434452
  0.93170000   2.61175369
  0.93170000   1.81562696
  0.93170000   2.67540416
  0.93170000   1.67795377
  0.93170000   2.56138214
  0.93170000   1.93140187
  0.93170000   2.72335609
  0.93170000   1.57553976
  0.93170000   2.44824571
  0.93170000   2.17814702
  0.93170000   2.61837094
  0.93170000   1.80089544
  0.93170000   2.66580280
  0.93180000   2.05955679
  0.93180000   2.70864016
  0.93180000   1.60570502
  0.93180000   2.48470417
  0.93180000   2.10084649
  0.93180000   2.68585644
  0.93180000   1.65385210
  0.93180000   2.53771579
  0.93180000   1.98434700
  0.93180000   2.72753225
  0.93180000   1.56668261
  0.93180000   2.43876844
  0.93180000   2.19829495
  0.93180000   2.59674594
  0.93180000   1.84908613
  0.93180000   2.69557149
  0.93180000   1.63445893
  0.93180000   2.51688342
  0.93180000   2.03046034
  0.93180000   2.71925869
  0.93180000   1.58348974
  0.93180000   2.45883398
  0.93180000   2.15611003
  0.93180000   2.64130089
  0.93190000   2.18358663
  0.93190000   2.61423310
  0.93190000   1.81055680
  0.93190000   2.67455865
  0.93190000   1.68015716
  0.93190000   2.56597224
  0.93190000   1.92165557
  0.93190000   2.72366713
  0.93190000   1.57523750
  0.93190000   2.45020961
  0.93190000   2.17480039
  0.93190000   2.62353434
  0.93190000   1.78983469
  0.93190000   2.66051779
  0.93190000   1.71077122
  0.93190000   2.59549492
  0.93190000   1.85545578
  0.93190000   2.70006877
  0.93190000   1.62517402
  0.93190000   2.50783634
  0.93190000   2.05068370
  0.93190000   2.71326772
  0.93190000   1.59600185
  0.93190000   2.47465473
  0.93200000   1.78461946
  0.93200000   2.65812051
  0.93200000   1.71654049
  0.93200000   2.60204721
  0.93200000   1.84115342
  0.93200000   2.69395625
  0.93200000   1.63853206
  0.93200000   2.52370644
  0.93200000   2.01607873
  0.93200000   2.72507885
  0.93200000   1.57180455
  0.93200000   2.44724689
  0.93200000   2.18132426
  0.93200000   2.61735854
  0.93200000   1.80364477
  0.93200000   2.67117522
  0.93200000   1.68755546
  0.93200000   2.57447049
  0.93200000   1.90273403
  0.93200000   2.71983735
  0.93200000   1.58334445
  0.93200000   2.46099449
  0.93200000   2.15227211
  0.93200000   2.64659669
  0.93210000   1.57202908
  0.93210000   2.44868886
  0.93210000   2.17875065
  0.93210000   2.62098846
  0.93210000   1.79584555
  0.93210000   2.66709330
  0.93210000   1.69669702
  0.93210000   2.58456647
  0.93210000   1.88038261
  0.93210000   2.71330099
  0.93210000   1.59733181
  0.93210000   2.47855454
  0.93210000   2.11506223
  0.93210000   2.67859982
  0.93210000   1.66969644
  0.93210000   2.55770423
  0.93210000   1.94039144
  0.93210000   2.72915962
  0.93210000   1.56386198
  0.93210000   2.43881158
  0.93210000   2.19927213
  0.93210000   2.59783881
  0.93210000   1.84712690
  0.93210000   2.69802463
  0.93220000   1.82690891
  0.93220000   2.68812054
  0.93220000   1.65115190
  0.93220000   2.53960393
  0.93220000   1.98123698
  0.93220000   2.73199345
  0.93220000   1.55797192
  0.93220000   2.43280534
  0.93220000   2.21217633
  0.93220000   2.58306486
  0.93220000   1.88029475
  0.93220000   2.71418810
  0.93220000   1.59531646
  0.93220000   2.47736029
  0.93220000   2.11786267
  0.93220000   2.67735651
  0.93220000   1.67244195
  0.93220000   2.56167816
  0.93220000   1.93168235
  0.93220000   2.72890485
  0.93220000   1.56452452
  0.93220000   2.44076678
  0.93220000   2.19554740
  0.93220000   2.60292741
  0.93230000   1.84760511
  0.93230000   2.70064961
  0.93230000   1.62434274
  0.93230000   2.51161131
  0.93230000   2.04353876
  0.93230000   2.71999179
  0.93230000   1.58250275
  0.93230000   2.46348135
  0.93230000   2.14798963
  0.93230000   2.65309323
  0.93230000   1.72530648
  0.93230000   2.61341492
  0.93230000   1.81592725
  0.93230000   2.68273031
  0.93230000   1.66299963
  0.93230000   2.55320971
  0.93230000   1.95102391
  0.93230000   2.73255012
  0.93230000   1.55704673
  0.93230000   2.43281637
  0.93230000   2.21246145
  0.93230000   2.58338600
  0.93230000   1.87968997
  0.93230000   2.71506756
  0.93240000   1.61865576
  0.93240000   2.50641327
  0.93240000   2.05522082
  0.93240000   2.71633043
  0.93240000   1.59018849
  0.93240000   2.47370571
  0.93240000   2.12640849
  0.93240000   2.67249813
  0.93240000   1.68321954
  0.93240000   2.57488823
  0.93240000   1.90253671
  0.93240000   2.72428743
  0.93240000   1.57452226
  0.93240000   2.45513672
  0.93240000   2.16608741
  0.93240000   2.63648067
  0.93240000   1.76191619
  0.93240000   2.64544346
  0.93240000   1.74470563
  0.93240000   2.63146745
  0.93240000   1.77589317
  0.93240000   2.65633037
  0.93240000   1.72083640
  0.93240000   2.61065152
  0.93250000   1.57019709
  0.93250000   2.45111906
  0.93250000   2.17506020
  0.93250000   2.62808970
  0.93250000   1.78071459
  0.93250000   2.66101690
  0.93250000   1.71057415
  0.93250000   2.60243712
  0.93250000   1.84104527
  0.93250000   2.69967304
  0.93250000   1.62682226
  0.93250000   2.51671528
  0.93250000   2.03278386
  0.93250000   2.72562523
  0.93250000   1.57103453
  0.93250000   2.45209859
  0.93250000   2.17280226
  0.93250000   2.63035384
  0.93250000   1.77557173
  0.93250000   2.65715933
  0.93250000   1.71895234
  0.93250000   2.61011320
  0.93250000   1.82374183
  0.93250000   2.68983978
  0.93260000   1.76774982
  0.93260000   2.65252735
  0.93260000   1.72968118
  0.93260000   2.62095639
  0.93260000   1.79985105
  0.93260000   2.67584614
  0.93260000   1.67848154
  0.93260000   2.57258867
  0.93260000   1.90831843
  0.93260000   2.72822792
  0.93260000   1.56660402
  0.93260000   2.44792418
  0.93260000   2.18206546
  0.93260000   2.62126927
  0.93260000   1.79589787
  0.93260000   2.67298495
  0.93260000   1.68440745
  0.93260000   2.57846634
  0.93260000   1.89497371
  0.93260000   2.72418752
  0.93260000   1.57496645
  0.93260000   2.45798292
  0.93260000   2.16069318
  0.93260000   2.64346791
  0.93270000   1.99383340
  0.93270000   2.73618301
  0.93270000   1.54985039
  0.93270000   2.42858899
  0.93270000   2.22280962
  0.93270000   2.57320409
  0.93270000   1.90328055
  0.93270000   2.72767898
  0.93270000   1.56760875
  0.93270000   2.45028302
  0.93270000   2.17736364
  0.93270000   2.62712269
  0.93270000   1.78303834
  0.93270000   2.66505061
  0.93270000   1.70190009
  0.93270000   2.59663788
  0.93270000   1.85434222
  0.93270000   2.70876329
  0.93270000   1.60762495
  0.93270000   2.49741325
  0.93270000   2.07578198
  0.93270000   2.70919641
  0.93270000   1.60524633
  0.93270000   2.49466127
  0.93280000   2.13242523
  0.93280000   2.67107984
  0.93280000   1.68682752
  0.93280000   2.58320945
  0.93280000   1.88469241
  0.93280000   2.72290946
  0.93280000   1.57796323
  0.93280000   2.46390053
  0.93280000   2.14881442
  0.93280000   2.65654426
  0.93280000   1.71840912
  0.93280000   2.61313500
  0.93280000   1.81740366
  0.93280000   2.68950305
  0.93280000   1.64899179
  0.93280000   2.54437251
  0.93280000   1.97193178
  0.93280000   2.73868203
  0.93280000   1.54486599
  0.93280000   2.42354656
  0.93280000   2.23347522
  0.93280000   2.55966780
  0.93280000   1.93359869
  0.93280000   2.73558513
  0.93290000   2.19834511
  0.93290000   2.60507870
  0.93290000   1.83247909
  0.93290000   2.69946499
  0.93290000   1.62758058
  0.93290000   2.52225159
  0.93290000   2.02153332
  0.93290000   2.73290959
  0.93290000   1.55651079
  0.93290000   2.43908044
  0.93290000   2.20164528
  0.93290000   2.60106621
  0.93290000   1.84133251
  0.93290000   2.70428540
  0.93290000   1.61718894
  0.93290000   2.51061360
  0.93290000   2.04723888
  0.93290000   2.72444459
  0.93290000   1.57374817
  0.93290000   2.45998852
  0.93290000   2.15734354
  0.93290000   2.64918156
  0.93290000   1.73457561
  0.93290000   2.62866457
  0.93300000   2.22705195
  0.93300000   2.56978222
  0.93300000   1.91154360
  0.93300000   2.73331495
  0.93300000   1.55627365
  0.93300000   2.43994443
  0.93300000   2.20022018
  0.93300000   2.60353696
  0.93300000   1.83600468
  0.93300000   2.70257098
  0.93300000   1.62099323
  0.93300000   2.51607043
  0.93300000   2.03544962
  0.93300000   2.72974071
  0.93300000   1.56299497
  0.93300000   2.44815092
  0.93300000   2.18286598
  0.93300000   2.62345122
  0.93300000   1.79159087
  0.93300000   2.67469007
  0.93300000   1.68116917
  0.93300000   2.57997768
  0.93300000   1.89232889
  0.93300000   2.72783633
  0.93310000   2.23983032
  0.93310000   2.55313372
  0.93310000   1.94895641
  0.93310000   2.74082724
  0.93310000   1.54076400
  0.93310000   2.42188247
  0.93310000   2.23808189
  0.93310000   2.55548379
  0.93310000   1.94362794
  0.93310000   2.74026734
  0.93310000   1.54187522
  0.93310000   2.42326209
  0.93310000   2.23518640
  0.93310000   2.55941407
  0.93310000   1.93479227
  0.93310000   2.73908780
  0.93310000   1.54429368
  0.93310000   2.42627123
  0.93310000   2.22894101
  0.93310000   2.56782350
  0.93310000   1.91594967
  0.93310000   2.73544327
  0.93310000   1.55183721
  0.93310000   2.43561797
  0.93320000   2.24598820
  0.93320000   2.54516787
  0.93320000   1.96695136
  0.93320000   2.74271005
  0.93320000   1.53691778
  0.93320000   2.41821152
  0.93320000   2.24599529
  0.93320000   2.54508560
  0.93320000   1.96705383
  0.93320000   2.74267490
  0.93320000   1.53692390
  0.93320000   2.41821058
  0.93320000   2.24593731
  0.93320000   2.54512011
  0.93320000   1.96692237
  0.93320000   2.74265065
  0.93320000   1.53692938
  0.93320000   2.41821143
  0.93320000   2.24589336
  0.93320000   2.54514843
  0.93320000   1.96681996
  0.93320000   2.74263298
  0.93320000   1.53693318
  0.93320000   2.41821176
  0.93330000   2.24889290
  0.93330000   2.54169346
  0.93330000   1.97492260
  0.93330000   2.74363951
  0.93330000   1.53507982
  0.93330000   2.41704822
  0.93330000   2.24876616
  0.93330000   2.54180286
  0.93330000   1.97459774
  0.93330000   2.74361536
  0.93330000   1.53506652
  0.93330000   2.41702293
  0.93330000   2.24875833
  0.93330000   2.54176626
  0.93330000   1.97462495
  0.93330000   2.74358984
  0.93330000   1.53507353
  0.93330000   2.41702574
  0.93330000   2.24871029
  0.93330000   2.54180089
  0.93330000   1.97450844
  0.93330000   2.74357615
  0.93330000   1.53506933
  0.93330000   2.41701603
  0.93340000   2.24995450
  0.93340000   2.54083278
  0.93340000   1.97706732
  0.93340000   2.74461344
  0.93340000   1.53319356
  0.93340000   2.41581881
  0.93340000   2.25167608
  0.93340000   2.53827548
  0.93340000   1.98268954
  0.93340000   2.74422715
  0.93340000   1.53387417
  0.93340000   2.41666794
  0.93340000   2.24987488
  0.93340000   2.54082701
  0.93340000   1.97694476
  0.93340000   2.74455835
  0.93340000   1.53319701
  0.93340000   2.41580865
  0.93340000   2.25159488
  0.93340000   2.53831060
  0.93340000   1.98251749
  0.93340000   2.74419681
  0.93340000   1.53385954
  0.93340000   2.41663909
  0.93350000   2.25095286
  0.93350000   2.54005561
  0.93350000   1.97902794
  0.93350000   2.74557220
  0.93350000   1.53134229
  0.93350000   2.41462772
  0.93350000   2.25450777
  0.93350000   2.53481383
  0.93350000   1.99063541
  0.93350000   2.74452099
  0.93350000   1.53332771
  0.93350000   2.41712550
  0.93350000   2.24932684
  0.93350000   2.54228019
  0.93350000   1.97392701
  0.93350000   2.74575008
  0.93350000   1.53090764
  0.93350000   2.41406405
  0.93350000   2.25556069
  0.93350000   2.53318943
  0.93350000   1.99416075
  0.93350000   2.74403754
  0.93350000   1.53420628
  0.93350000   2.41822256
  0.93360000   2.25462662
  0.93360000   2.53536895
  0.93360000   1.98971186
  0.93360000   2.74571573
  0.93360000   1.53108308
  0.93360000   2.41544578
  0.93360000   2.25322482
  0.93360000   2.53734412
  0.93360000   1.98522525
  0.93360000   2.74613270
  0.93360000   1.53020573
  0.93360000   2.41432731
  0.93360000   2.25545646
  0.93360000   2.53403013
  0.93360000   1.99256042
  0.93360000   2.74531217
  0.93360000   1.53177106
  0.93360000   2.41630097
  0.93360000   2.25136853
  0.93360000   2.53996057
  0.93360000   1.97929233
  0.93360000   2.74653992
  0.93360000   1.52934552
  0.93360000   2.41322785
  0.93370000   2.26188847
  0.93370000   2.52525937
  0.93370000   2.01246227
  0.93370000   2.74290436
  0.93370000   1.53672763
  0.93370000   2.42371166
  0.93370000   2.23658370
  0.93370000   2.56166195
  0.93370000   1.93103829
  0.93370000   2.74515280
  0.93370000   1.53264598
  0.93370000   2.41856456
  0.93370000   2.24719361
  0.93370000   2.54669667
  0.93370000   1.96451631
  0.93370000   2.74802446
  0.93370000   1.52658901
  0.93370000   2.41088082
  0.93370000   2.26286690
  0.93370000   2.52363713
  0.93370000   2.01589696
  0.93370000   2.74200910
  0.93370000   1.53838213
  0.93370000   2.42577117
  0.93380000   2.26418223
  0.93380000   2.52245646
  0.93380000   2.01894439
  0.93380000   2.74234863
  0.93380000   1.53791734
  0.93380000   2.42635685
  0.93380000   2.23147880
  0.93380000   2.56935780
  0.93380000   1.91397636
  0.93380000   2.74285126
  0.93380000   1.53752489
  0.93380000   2.42586305
  0.93380000   2.23250707
  0.93380000   2.56793581
  0.93380000   1.91713271
  0.93380000   2.74356243
  0.93380000   1.53602485
  0.93380000   2.42397043
  0.93380000   2.23639270
  0.93380000   2.56256255
  0.93380000   1.92915171
  0.93380000   2.74591590
  0.93380000   1.53115015
  0.93380000   2.41781166
  0.93390000   2.23293422
  0.93390000   2.56816781
  0.93390000   1.91694872
  0.93390000   2.74469373
  0.93390000   1.53394592
  0.93390000   2.42251380
  0.93390000   2.23989751
  0.93390000   2.55844792
  0.93390000   1.93868269
  0.93390000   2.74847684
  0.93390000   1.52610011
  0.93390000   2.41255834
  0.93390000   2.26030786
  0.93390000   2.52881130
  0.93390000   2.00491804
  0.93390000   2.74648376
  0.93390000   1.52963595
  0.93390000   2.41703943
  0.93390000   2.25103397
  0.93390000   2.54243716
  0.93390000   1.97444074
  0.93390000   2.74998889
  0.93390000   1.52273939
  0.93390000   2.40825988
  0.93400000   2.11420245
  0.93400000   2.69621904
  0.93400000   1.63413375
  0.93400000   2.54243838
  0.93400000   1.97901757
  0.93400000   2.75123526
  0.93400000   1.52069904
  0.93400000   2.40682307
  0.93400000   2.27249522
  0.93400000   2.51093902
  0.93400000   2.04493581
  0.93400000   2.73576449
  0.93400000   1.55131406
  0.93400000   2.44536328
  0.93400000   2.19221489
  0.93400000   2.62050153
  0.93400000   1.79964750
  0.93400000   2.69201299
  0.93400000   1.64484305
  0.93400000   2.55409122
  0.93400000   1.95273253
  0.93400000   2.75118171
  0.93400000   1.52087264
  0.93400000   2.40703266
  0.93410000   1.86125406
  0.93410000   2.72825706
  0.93410000   1.56845371
  0.93410000   2.46757911
  0.93410000   2.14520229
  0.93410000   2.67085094
  0.93410000   1.68884663
  0.93410000   2.60063273
  0.93410000   1.84781878
  0.93410000   2.72177716
  0.93410000   1.58188751
  0.93410000   2.48372083
  0.93410000   2.10995595
  0.93410000   2.70024559
  0.93410000   1.62558816
  0.93410000   2.53414301
  0.93410000   1.99780214
  0.93410000   2.75019227
  0.93410000   1.52269787
  0.93410000   2.41051288
  0.93410000   2.26529585
  0.93410000   2.52256451
  0.93410000   2.01930358
  0.93410000   2.74523675
  0.93420000   1.57785310
  0.93420000   2.48008314
  0.93420000   2.11832901
  0.93420000   2.69479976
  0.93420000   1.63737148
  0.93420000   2.54834900
  0.93420000   1.96615479
  0.93420000   2.75379194
  0.93420000   1.51585317
  0.93420000   2.40288682
  0.93420000   2.28129555
  0.93420000   2.49832985
  0.93420000   2.07331115
  0.93420000   2.72425545
  0.93420000   1.57506425
  0.93420000   2.47667572
  0.93420000   2.12542974
  0.93420000   2.68890697
  0.93420000   1.64979153
  0.93420000   2.56173597
  0.93420000   1.93579172
  0.93420000   2.75165100
  0.93420000   1.52021648
  0.93420000   2.40848015
  0.93430000   1.54724092
  0.93430000   2.44380802
  0.93430000   2.19678861
  0.93430000   2.61749767
  0.93430000   1.80696597
  0.93430000   2.70041826
  0.93430000   1.62725473
  0.93430000   2.53839370
  0.93430000   1.98887827
  0.93430000   2.75354509
  0.93430000   1.51630543
  0.93430000   2.40460921
  0.93430000   2.27819258
  0.93430000   2.50385138
  0.93430000   2.06138385
  0.93430000   2.73139463
  0.93430000   1.56046835
  0.93430000   2.46011297
  0.93430000   2.16166218
  0.93430000   2.65631401
  0.93430000   1.72069755
  0.93430000   2.63302808
  0.93430000   1.77516242
  0.93430000   2.67825502
  0.93440000   1.84877804
  0.93440000   2.72560354
  0.93440000   1.57410630
  0.93440000   2.47789672
  0.93440000   2.12363713
  0.93440000   2.69225264
  0.93440000   1.64298379
  0.93440000   2.55681254
  0.93440000   1.94745930
  0.93440000   2.75519429
  0.93440000   1.51335002
  0.93440000   2.40194194
  0.93440000   2.28402791
  0.93440000   2.49516030
  0.93440000   2.08083300
  0.93440000   2.72183653
  0.93440000   1.58024595
  0.93440000   2.48522045
  0.93440000   2.10731403
  0.93440000   2.70478799
  0.93440000   1.61617867
  0.93440000   2.52708929
  0.93440000   2.01429899
  0.93440000   2.74997911
  0.93450000   2.10076104
  0.93450000   2.70997174
  0.93450000   1.60524106
  0.93450000   2.51577154
  0.93450000   2.03997848
  0.93450000   2.74309883
  0.93450000   1.53722047
  0.93450000   2.43354931
  0.93450000   2.21910433
  0.93450000   2.59087225
  0.93450000   1.86694479
  0.93450000   2.73512416
  0.93450000   1.55432385
  0.93450000   2.45489254
  0.93450000   2.17370694
  0.93450000   2.64531781
  0.93450000   1.74525670
  0.93450000   2.65680215
  0.93450000   1.72254792
  0.93450000   2.63715983
  0.93450000   1.76641637
  0.93450000   2.67398082
  0.93450000   1.68491745
  0.93450000   2.60156155
  0.93460000   1.98185934
  0.93460000   2.75709823
  0.93460000   1.50939466
  0.93460000   2.39910455
  0.93460000   2.29059875
  0.93460000   2.48571558
  0.93460000   2.10219325
  0.93460000   2.70980181
  0.93460000   1.60561208
  0.93460000   2.51736226
  0.93460000   2.03660454
  0.93460000   2.74529921
  0.93460000   1.53282851
  0.93460000   2.42914462
  0.93460000   2.22867136
  0.93460000   2.57874831
  0.93460000   1.89436801
  0.93460000   2.74645011
  0.93460000   1.53114415
  0.93460000   2.42700407
  0.93460000   2.23313719
  0.93460000   2.57259867
  0.93460000   1.90818654
  0.93460000   2.75038829
  0.93470000   1.60054340
  0.93470000   2.51271401
  0.93470000   2.04747752
  0.93470000   2.74215587
  0.93470000   1.53936624
  0.93470000   2.43856594
  0.93470000   2.20929185
  0.93470000   2.60502247
  0.93470000   1.83551850
  0.93470000   2.72214954
  0.93470000   1.58161123
  0.93470000   2.49039445
  0.93470000   2.09700649
  0.93470000   2.71488171
  0.93470000   1.59534856
  0.93470000   2.50662599
  0.93470000   2.06090182
  0.93470000   2.73597988
  0.93470000   1.55175794
  0.93470000   2.45402814
  0.93470000   2.17617814
  0.93470000   2.64417517
  0.93470000   1.74802788
  0.93470000   2.66148707
  0.93480000   1.56185515
  0.93480000   2.46768570
  0.93480000   2.14727969
  0.93480000   2.67481206
  0.93480000   1.68110836
  0.93480000   2.60130937
  0.93480000   1.84756699
  0.93480000   2.72980877
  0.93480000   1.56597952
  0.93480000   2.47271015
  0.93480000   2.13621956
  0.93480000   2.68493622
  0.93480000   1.65911413
  0.93480000   2.57874596
  0.93480000   1.89859609
  0.93480000   2.75026746
  0.93480000   1.52389463
  0.93480000   2.42007941
  0.93480000   2.24842514
  0.93480000   2.55230429
  0.93480000   1.95434939
  0.93480000   2.75967603
  0.93480000   1.50450801
  0.93480000   2.39501037
  0.93490000   2.01069748
  0.93490000   2.75613992
  0.93490000   1.51173936
  0.93490000   2.40558587
  0.93490000   2.27876285
  0.93490000   2.50671811
  0.93490000   2.05672942
  0.93490000   2.73949253
  0.93490000   1.54460548
  0.93490000   2.44743094
  0.93490000   2.19100453
  0.93490000   2.62883826
  0.93490000   1.78243334
  0.93490000   2.69064468
  0.93490000   1.64896517
  0.93490000   2.56920383
  0.93490000   1.92051556
  0.93490000   2.75687752
  0.93490000   1.51064778
  0.93490000   2.40415378
  0.93490000   2.28157634
  0.93490000   2.50210849
  0.93490000   2.06683153
  0.93490000   2.73438589
  0.93500000   2.30366358
  0.93500000   2.46635155
  0.93500000   2.14572884
  0.93500000   2.67725837
  0.93500000   1.67566242
  0.93500000   2.59817818
  0.93500000   1.85489754
  0.93500000   2.73568242
  0.93500000   1.55400380
  0.93500000   2.46031477
  0.93500000   2.16378162
  0.93500000   2.65993235
  0.93500000   1.71375145
  0.93500000   2.63506519
  0.93500000   1.77175196
  0.93500000   2.68402052
  0.93500000   1.66365875
  0.93500000   2.58592004
  0.93500000   1.88285943
  0.93500000   2.74737971
  0.93500000   1.53002978
  0.93500000   2.43020887
  0.93500000   2.22801360
  0.93500000   2.58247770
  0.93510000   2.16225009
  0.93510000   2.66240452
  0.93510000   1.70855248
  0.93510000   2.63145941
  0.93510000   1.78009231
  0.93510000   2.69146006
  0.93510000   1.64773868
  0.93510000   2.57029586
  0.93510000   1.91858089
  0.93510000   2.75876557
  0.93510000   1.50719786
  0.93510000   2.40196436
  0.93510000   2.28693247
  0.93510000   2.49470114
  0.93510000   2.08383456
  0.93510000   2.72658684
  0.93510000   1.57111833
  0.93510000   2.48241277
  0.93510000   2.11560308
  0.93510000   2.70475686
  0.93510000   1.61698710
  0.93510000   2.53627003
  0.93510000   1.99534928
  0.93510000   2.76101948
  0.93520000   1.72533268
  0.93520000   2.64806100
  0.93520000   1.74330467
  0.93520000   2.66365751
  0.93520000   1.70871659
  0.93520000   2.63288992
  0.93520000   1.77723652
  0.93520000   2.69056485
  0.93520000   1.64984458
  0.93520000   2.57374620
  0.93520000   1.91096494
  0.93520000   2.75817796
  0.93520000   1.50851480
  0.93520000   2.40482187
  0.93520000   2.28151631
  0.93520000   2.50408809
  0.93520000   2.06330767
  0.93520000   2.73912573
  0.93520000   1.54556581
  0.93520000   2.45209786
  0.93520000   2.18196230
  0.93520000   2.64159511
  0.93520000   1.75441001
  0.93520000   2.67267468
  0.93530000   1.49434877
  0.93530000   2.38739993
  0.93530000   2.31716138
  0.93530000   2.44461942
  0.93530000   2.19339001
  0.93530000   2.62836694
  0.93530000   1.78378907
  0.93530000   2.69634888
  0.93530000   1.63711444
  0.93530000   2.56111618
  0.93530000   1.93970559
  0.93530000   2.76434218
  0.93530000   1.49620894
  0.93530000   2.38984473
  0.93530000   2.31221210
  0.93530000   2.45319652
  0.93530000   2.17494353
  0.93530000   2.64957957
  0.93530000   1.73654503
  0.93530000   2.65891621
  0.93530000   1.71888138
  0.93530000   2.64338921
  0.93530000   1.75364832
  0.93530000   2.67336141
  0.93540000   1.62750584
  0.93540000   2.55166011
  0.93540000   1.96131156
  0.93540000   2.76675208
  0.93540000   1.49150027
  0.93540000   2.38477297
  0.93540000   2.32283259
  0.93540000   2.43510857
  0.93540000   2.21390644
  0.93540000   2.60337311
  0.93540000   1.83998822
  0.93540000   2.73266594
  0.93540000   1.56040461
  0.93540000   2.47284893
  0.93540000   2.13765845
  0.93540000   2.68869320
  0.93540000   1.65162552
  0.93540000   2.57795349
  0.93540000   1.90151645
  0.93540000   2.75790231
  0.93540000   1.50920786
  0.93540000   2.40799988
  0.93540000   2.27573390
  0.93540000   2.51450641
  0.93550000   1.84415254
  0.93550000   2.73603464
  0.93550000   1.55366972
  0.93550000   2.46570901
  0.93550000   2.15368638
  0.93550000   2.67432425
  0.93550000   1.68292074
  0.93550000   2.61146133
  0.93550000   1.82575585
  0.93550000   2.72620396
  0.93550000   1.57428713
  0.93550000   2.49097015
  0.93550000   2.09812440
  0.93550000   2.72145652
  0.93550000   1.58247151
  0.93550000   2.50078343
  0.93550000   2.07614397
  0.93550000   2.73548501
  0.93550000   1.55353510
  0.93550000   2.46552406
  0.93550000   2.15394464
  0.93550000   2.67398421
  0.93550000   1.68356118
  0.93550000   2.61207862
  0.93560000   1.89988797
  0.93560000   2.75947422
  0.93560000   1.50614384
  0.93560000   2.40629769
  0.93560000   2.28008746
  0.93560000   2.50882946
  0.93560000   2.05383480
  0.93560000   2.74764971
  0.93560000   1.52879782
  0.93560000   2.43553854
  0.93560000   2.21883581
  0.93560000   2.59906951
  0.93560000   1.85034571
  0.93560000   2.74028349
  0.93560000   1.54499846
  0.93560000   2.45604380
  0.93560000   2.17492873
  0.93560000   2.65269889
  0.93560000   1.73039842
  0.93560000   2.65719911
  0.93560000   1.72320204
  0.93560000   2.65089282
  0.93560000   1.73738879
  0.93560000   2.66336392
  0.93570000   1.78467542
  0.93570000   2.70176613
  0.93570000   1.62605074
  0.93570000   2.55363040
  0.93570000   1.95764316
  0.93570000   2.76997584
  0.93570000   1.48556569
  0.93570000   2.38030235
  0.93570000   2.33304913
  0.93570000   2.41828259
  0.93570000   2.25031218
  0.93570000   2.55464777
  0.93570000   1.95062165
  0.93570000   2.76924968
  0.93570000   1.48660784
  0.93570000   2.38166542
  0.93570000   2.33016882
  0.93570000   2.42339161
  0.93570000   2.23954199
  0.93570000   2.57028008
  0.93570000   1.91518164
  0.93570000   2.76436049
  0.93570000   1.49633622
  0.93570000   2.39454508
  0.93580000   1.61009464
  0.93580000   2.53669744
  0.93580000   1.99615147
  0.93580000   2.76829768
  0.93580000   1.48870030
  0.93580000   2.38560598
  0.93580000   2.32291543
  0.93580000   2.43710801
  0.93580000   2.21110559
  0.93580000   2.60992861
  0.93580000   1.82588394
  0.93580000   2.72958823
  0.93580000   1.56727372
  0.93580000   2.48593899
  0.93580000   2.11004509
  0.93580000   2.71537346
  0.93580000   1.59541281
  0.93580000   2.51963849
  0.93580000   2.03462476
  0.93580000   2.75803368
  0.93580000   1.50857465
  0.93580000   2.41175027
  0.93580000   2.26954202
  0.93580000   2.52676172
  0.93590000   1.49850986
  0.93590000   2.39971746
  0.93590000   2.29480256
  0.93590000   2.48642770
  0.93590000   2.10444286
  0.93590000   2.71996311
  0.93590000   1.58569778
  0.93590000   2.50931965
  0.93590000   2.05808432
  0.93590000   2.74899799
  0.93590000   1.52662725
  0.93590000   2.43623548
  0.93590000   2.21850425
  0.93590000   2.60168991
  0.93590000   1.84495956
  0.93590000   2.74111811
  0.93590000   1.54365228
  0.93590000   2.45783704
  0.93590000   2.17204756
  0.93590000   2.65826463
  0.93590000   1.71850767
  0.93590000   2.65017078
  0.93590000   1.73926189
  0.93590000   2.66854204
  0.93600000   1.48635819
  0.93600000   2.38476635
  0.93600000   2.32551484
  0.93600000   2.43355390
  0.93600000   2.21940832
  0.93600000   2.60044572
  0.93600000   1.84763868
  0.93600000   2.74359220
  0.93600000   1.53867842
  0.93600000   2.45272867
  0.93600000   2.18347670
  0.93600000   2.64615935
  0.93600000   1.74544798
  0.93600000   2.67487906
  0.93600000   1.68474790
  0.93600000   2.61930323
  0.93600000   1.80894934
  0.93600000   2.72189944
  0.93600000   1.58387965
  0.93600000   2.50836305
  0.93600000   2.06067659
  0.93600000   2.74871273
  0.93600000   1.52730443
  0.93600000   2.43825416
  0.93610000   1.53972351
  0.93610000   2.45523220
  0.93610000   2.17853756
  0.93610000   2.65270941
  0.93610000   1.73117583
  0.93610000   2.66389910
  0.93610000   1.70917120
  0.93610000   2.64406548
  0.93610000   1.75346899
  0.93610000   2.68281235
  0.93610000   1.66779748
  0.93610000   2.60335452
  0.93610000   1.84536789
  0.93610000   2.74389046
  0.93610000   1.53852608
  0.93610000   2.45371339
  0.93610000   2.18178296
  0.93610000   2.64894013
  0.93610000   1.73944482
  0.93610000   2.67101695
  0.93610000   1.69337741
  0.93610000   2.62898655
  0.93610000   1.78725118
  0.93610000   2.70849852
  0.93620000   1.60658566
  0.93620000   2.53743387
  0.93620000   1.99564145
  0.93620000   2.77263726
  0.93620000   1.48076094
  0.93620000   2.37956203
  0.93620000   2.33677933
  0.93620000   2.41405496
  0.93620000   2.26107229
  0.93620000   2.54165907
  0.93620000   1.98110894
  0.93620000   2.77403188
  0.93620000   1.47770194
  0.93620000   2.37543293
  0.93620000   2.34477347
  0.93620000   2.39905067
  0.93620000   2.29184565
  0.93620000   2.49206742
  0.93620000   2.09228449
  0.93620000   2.73114607
  0.93620000   1.56267033
  0.93620000   2.48494096
  0.93620000   2.11322047
  0.93620000   2.71637964
  0.93630000   1.64464894
  0.93630000   2.58125970
  0.93630000   1.89606673
  0.93630000   2.76665366
  0.93630000   1.49310615
  0.93630000   2.39715479
  0.93630000   2.30181557
  0.93630000   2.47688868
  0.93630000   2.12668413
  0.93630000   2.70562109
  0.93630000   1.61623243
  0.93630000   2.54961826
  0.93630000   1.96785474
  0.93630000   2.77637299
  0.93630000   1.47368472
  0.93630000   2.37117237
  0.93630000   2.35372473
  0.93630000   2.38269361
  0.93630000   2.32532420
  0.93630000   2.43434650
  0.93630000   2.21827774
  0.93630000   2.60385179
  0.93630000   1.84022054
  0.93630000   2.74327468
  0.93640000   1.63189802
  0.93640000   2.56848059
  0.93640000   1.92540862
  0.93640000   2.77463463
  0.93640000   1.47753303
  0.93640000   2.37750132
  0.93640000   2.34181261
  0.93640000   2.40575679
  0.93640000   2.27905123
  0.93640000   2.51446848
  0.93640000   2.04289366
  0.93640000   2.76025089
  0.93640000   1.50446111
  0.93640000   2.41323570
  0.93640000   2.26877021
  0.93640000   2.53172884
  0.93640000   2.00430455
  0.93640000   2.77254438
  0.93640000   1.48068226
  0.93640000   2.38169784
  0.93640000   2.33319682
  0.93640000   2.42151444
  0.93640000   2.24611661
  0.93640000   2.56542646
  0.93650000   1.56825854
  0.93650000   2.49537205
  0.93650000   2.09127294
  0.93650000   2.73542916
  0.93650000   1.55476975
  0.93650000   2.47873079
  0.93650000   2.12818061
  0.93650000   2.70669595
  0.93650000   1.61450780
  0.93650000   2.55005029
  0.93650000   1.96742779
  0.93650000   2.77858180
  0.93650000   1.46971712
  0.93650000   2.36807871
  0.93650000   2.36075478
  0.93650000   2.37020072
  0.93650000   2.35097528
  0.93650000   2.38782346
  0.93650000   2.31550333
  0.93650000   2.45282485
  0.93650000   2.17921837
  0.93650000   2.65398910
  0.93650000   1.72820549
  0.93650000   2.66598846
  0.93660000   1.48807328
  0.93660000   2.39388159
  0.93660000   2.30973331
  0.93660000   2.46487172
  0.93660000   2.15399632
  0.93660000   2.68242747
  0.93660000   1.66630014
  0.93660000   2.60769900
  0.93660000   1.83608400
  0.93660000   2.74488137
  0.93660000   1.53703703
  0.93660000   2.45762629
  0.93660000   2.17493799
  0.93660000   2.66066526
  0.93660000   1.71417929
  0.93660000   2.65461910
  0.93660000   1.73039628
  0.93660000   2.66927446
  0.93660000   1.69806504
  0.93660000   2.63953408
  0.93660000   1.76433771
  0.93660000   2.69743107
  0.93660000   1.63667796
  0.93660000   2.57612599
  0.93670000   1.48145612
  0.93670000   2.38616616
  0.93670000   2.32572438
  0.93670000   2.43688303
  0.93670000   2.21483484
  0.93670000   2.61159029
  0.93670000   1.82362702
  0.93670000   2.73889936
  0.93670000   1.54913544
  0.93670000   2.47402965
  0.93670000   2.13917322
  0.93670000   2.69840039
  0.93670000   1.63231592
  0.93670000   2.57245573
  0.93670000   1.91666999
  0.93670000   2.77629621
  0.93670000   1.47457847
  0.93670000   2.37690889
  0.93670000   2.34423633
  0.93670000   2.40263162
  0.93670000   2.28660818
  0.93670000   2.50379416
  0.93670000   2.06753344
  0.93670000   2.75114372
  0.93680000   1.69695885
  0.93680000   2.64079320
  0.93680000   1.76165694
  0.93680000   2.69772726
  0.93680000   1.63632977
  0.93680000   2.57814310
  0.93680000   1.90413596
  0.93680000   2.77458220
  0.93680000   1.47816479
  0.93680000   2.38288598
  0.93680000   2.33282403
  0.93680000   2.42444171
  0.93680000   2.24160280
  0.93680000   2.57484709
  0.93680000   1.90705420
  0.93680000   2.77493072
  0.93680000   1.47706107
  0.93680000   2.38137608
  0.93680000   2.33567083
  0.93680000   2.41905625
  0.93680000   2.25282794
  0.93680000   2.55805899
  0.93680000   1.94513020
  0.93680000   2.78095134
  0.93690000   2.16750708
  0.93690000   2.67050167
  0.93690000   1.69258945
  0.93690000   2.63773687
  0.93690000   1.76860068
  0.93690000   2.70429731
  0.93690000   1.62229299
  0.93690000   2.56368137
  0.93690000   1.93734752
  0.93690000   2.78182716
  0.93690000   1.46418075
  0.93690000   2.36508418
  0.93690000   2.36852448
  0.93690000   2.35697638
  0.93690000   2.37859007
  0.93690000   2.33591694
  0.93690000   2.41799517
  0.93690000   2.25500269
  0.93690000   2.55523070
  0.93690000   1.95165519
  0.93690000   2.78237890
  0.93690000   1.46256124
  0.93690000   2.36284829
  0.93690000   2.37265628
  0.93700000   2.52064874
  0.93700000   2.03053022
  0.93700000   2.77110373
  0.93700000   1.48400365
  0.93700000   2.39298051
  0.93700000   2.31309234
  0.93700000   2.46106892
  0.93700000   2.16350066
  0.93700000   2.67569631
  0.93700000   1.68135070
  0.93700000   2.62782062
  0.93700000   1.79107229
  0.93700000   2.72187182
  0.93700000   1.58509217
  0.93700000   2.52159457
  0.93700000   2.03343394
  0.93700000   2.77057563
  0.93700000   1.48531489
  0.93700000   2.39474215
  0.93700000   2.30952768
  0.93700000   2.46734649
  0.93700000   2.14971358
  0.93700000   2.68998015
  0.93700000   1.65033429
  0.93710000   2.51946197
  0.93710000   2.03346198
  0.93710000   2.77102887
  0.93710000   1.48424329
  0.93710000   2.39444109
  0.93710000   2.31053368
  0.93710000   2.46614480
  0.93710000   2.15270313
  0.93710000   2.68782399
  0.93710000   1.65515241
  0.93710000   2.60198655
  0.93710000   1.84991348
  0.93710000   2.75776897
  0.93710000   1.51159921
  0.93710000   2.43064848
  0.93710000   2.23490480
  0.93710000   2.58745288
  0.93710000   1.87932754
  0.93710000   2.76999284
  0.93710000   1.48719064
  0.93710000   2.39838490
  0.93710000   2.30247047
  0.93710000   2.48020102
  0.93710000   2.12164155
  0.93720000   1.92745288
  0.93720000   2.78353430
  0.93720000   1.46106595
  0.93720000   2.36421631
  0.93720000   2.37160312
  0.93720000   2.35229500
  0.93720000   2.38905784
  0.93720000   2.31620837
  0.93720000   2.45553357
  0.93720000   2.17577798
  0.93720000   2.66350846
  0.93720000   1.70818213
  0.93720000   2.65620968
  0.93720000   1.72754785
  0.93720000   2.67395176
  0.93720000   1.68849968
  0.93720000   2.63741996
  0.93720000   1.76997162
  0.93720000   2.70894642
  0.93720000   1.61272790
  0.93720000   2.55635963
  0.93720000   1.95467982
  0.93720000   2.78625406
  0.93720000   1.45598935
  0.93730000   1.49126647
  0.93730000   2.40613296
  0.93730000   2.28745857
  0.93730000   2.50707494
  0.93730000   2.06233572
  0.93730000   2.75995522
  0.93730000   1.50606269
  0.93730000   2.42568938
  0.93730000   2.24612052
  0.93730000   2.57239169
  0.93730000   1.91399114
  0.93730000   2.78224106
  0.93730000   1.46368935
  0.93730000   2.36892115
  0.93730000   2.36276909
  0.93730000   2.37003963
  0.93730000   2.35494117
  0.93730000   2.38411112
  0.93730000   2.32644239
  0.93730000   2.43743509
  0.93730000   2.21515230
  0.93730000   2.61518475
  0.93730000   1.81619452
  0.93730000   2.74152128
  0.93740000   2.29488977
  0.93740000   2.49514997
  0.93740000   2.08941117
  0.93740000   2.74445226
  0.93740000   1.53706322
  0.93740000   2.46694596
  0.93740000   2.15697163
  0.93740000   2.68659944
  0.93740000   1.65850771
  0.93740000   2.60916319
  0.93740000   1.83419916
  0.93740000   2.75329397
  0.93740000   1.52099340
  0.93740000   2.44633708
  0.93740000   2.20224618
  0.93740000   2.63396696
  0.93740000   1.77467056
  0.93740000   2.71474711
  0.93740000   1.60044090
  0.93740000   2.54448444
  0.93740000   1.98223308
  0.93740000   2.78716611
  0.93740000   1.45433925
  0.93740000   2.35724710
  0.93750000   2.03504914
  0.93750000   2.77510455
  0.93750000   1.47727875
  0.93750000   2.38965629
  0.93750000   2.32220481
  0.93750000   2.44759358
  0.93750000   2.19461266
  0.93750000   2.64358507
  0.93750000   1.75296795
  0.93750000   2.69902990
  0.93750000   1.63409712
  0.93750000   2.58401302
  0.93750000   1.89195246
  0.93750000   2.77908328
  0.93750000   1.47030987
  0.93750000   2.38020761
  0.93750000   2.34127246
  0.93750000   2.41226745
  0.93750000   2.26984891
  0.93750000   2.53607010
  0.93750000   1.99670107
  0.93750000   2.78550716
  0.93750000   1.45711788
  0.93750000   2.36217362
  0.93760000   1.62240679
  0.93760000   2.57213613
  0.93760000   1.91939228
  0.93760000   2.78702965
  0.93760000   1.45528708
  0.93760000   2.36081928
  0.93760000   2.38024606
  0.93760000   2.33694235
  0.93760000   2.42017146
  0.93760000   2.25339497
  0.93760000   2.56243764
  0.93760000   1.93685570
  0.93760000   2.78910725
  0.93760000   1.45084896
  0.93760000   2.35468005
  0.93760000   2.39195419
  0.93760000   2.31306815
  0.93760000   2.46365759
  0.93760000   2.15943654
  0.93760000   2.68478976
  0.93760000   1.66218244
  0.93760000   2.61537157
  0.93760000   1.82019971
  0.93760000   2.74769458
  0.93770000   2.49394377
  0.93770000   2.09270337
  0.93770000   2.74487595
  0.93770000   1.53647071
  0.93770000   2.46968400
  0.93770000   2.15185409
  0.93770000   2.69436276
  0.93770000   1.64211995
  0.93770000   2.59518569
  0.93770000   1.86664427
  0.93770000   2.77227253
  0.93770000   1.48377254
  0.93770000   2.40067064
  0.93770000   2.30037159
  0.93770000   2.48735984
  0.93770000   2.10755939
  0.93770000   2.73378836
  0.93770000   1.55894405
  0.93770000   2.49793280
  0.93770000   2.08858431
  0.93770000   2.74823202
  0.93770000   1.52990351
  0.93770000   2.46128155
  0.93770000   2.17037948
  0.93780000   1.44461899
  0.93780000   2.34833923
  0.93780000   2.40538395
  0.93780000   2.28643597
  0.93780000   2.51107999
  0.93780000   2.05435423
  0.93780000   2.76886596
  0.93780000   1.48913391
  0.93780000   2.40898389
  0.93780000   2.28330678
  0.93780000   2.51686509
  0.93780000   2.04141297
  0.93780000   2.77487544
  0.93780000   1.47756479
  0.93780000   2.39342822
  0.93780000   2.31553944
  0.93780000   2.46107162
  0.93780000   2.16603437
  0.93780000   2.67936160
  0.93780000   1.67428241
  0.93780000   2.63028091
  0.93780000   1.78671708
  0.93780000   2.72836473
  0.93780000   1.57243421
  0.93790000   2.35798028
  0.93790000   2.38233248
  0.93790000   2.33320441
  0.93790000   2.42842427
  0.93790000   2.23687081
  0.93790000   2.58911443
  0.93790000   1.87656590
  0.93790000   2.77815921
  0.93790000   1.47227859
  0.93790000   2.38741072
  0.93790000   2.32835400
  0.93790000   2.43834546
  0.93790000   2.21588221
  0.93790000   2.61877095
  0.93790000   1.80923090
  0.93790000   2.74439561
  0.93790000   1.53927107
  0.93790000   2.47558243
  0.93790000   2.13939668
  0.93790000   2.70835808
  0.93790000   1.61243100
  0.93790000   2.56430495
  0.93790000   1.93775622
  0.93790000   2.79290095
  0.93800000   2.76723777
  0.93800000   1.49248367
  0.93800000   2.41575301
  0.93800000   2.26987712
  0.93800000   2.54010523
  0.93800000   1.98910996
  0.93800000   2.79222765
  0.93800000   1.44531726
  0.93800000   2.35153112
  0.93800000   2.40003476
  0.93800000   2.29818372
  0.93800000   2.49210835
  0.93800000   2.09749027
  0.93800000   2.74408162
  0.93800000   1.53825712
  0.93800000   2.47544079
  0.93800000   2.13987568
  0.93800000   2.70870114
  0.93800000   1.61178589
  0.93800000   2.56475276
  0.93800000   1.93692923
  0.93800000   2.79392945
  0.93800000   1.44262584
  0.93800000   2.34779332
  0.93810000   2.34624508
  0.93810000   2.41078471
  0.93810000   2.27629531
  0.93810000   2.52969696
  0.93810000   2.01285547
  0.93810000   2.78803560
  0.93810000   1.45309694
  0.93810000   2.36342118
  0.93810000   2.37732776
  0.93810000   2.34490067
  0.93810000   2.40758485
  0.93810000   2.28173332
  0.93810000   2.52024112
  0.93810000   2.03404128
  0.93810000   2.78077042
  0.93810000   1.46654932
  0.93810000   2.38187080
  0.93810000   2.34034876
  0.93810000   2.41690525
  0.93810000   2.26233041
  0.93810000   2.55176628
  0.93810000   1.96221547
  0.93810000   2.79558492
  0.93810000   1.43919839
  0.93820000   2.79247046
  0.93820000   1.44502682
  0.93820000   2.35337855
  0.93820000   2.39746483
  0.93820000   2.30435656
  0.93820000   2.48252117
  0.93820000   2.11956734
  0.93820000   2.72829970
  0.93820000   1.57073378
  0.93820000   2.51834614
  0.93820000   2.04365476
  0.93820000   2.77832723
  0.93820000   1.47163995
  0.93820000   2.38996113
  0.93820000   2.32443101
  0.93820000   2.44714789
  0.93820000   2.19785068
  0.93820000   2.64469829
  0.93820000   1.75135766
  0.93820000   2.70611122
  0.93820000   1.61968232
  0.93820000   2.57619873
  0.93820000   1.91116301
  0.93820000   2.79208403
  0.93830000   2.31241253
  0.93830000   2.46963099
  0.93830000   2.14892376
  0.93830000   2.70172905
  0.93830000   1.62677849
  0.93830000   2.58538345
  0.93830000   1.89018764
  0.93830000   2.78770566
  0.93830000   1.45490467
  0.93830000   2.36818490
  0.93830000   2.36897344
  0.93830000   2.36255941
  0.93830000   2.37438897
  0.93830000   2.35060624
  0.93830000   2.39724266
  0.93830000   2.30385126
  0.93830000   2.48343761
  0.93830000   2.11747526
  0.93830000   2.73081453
  0.93830000   1.56550167
  0.93830000   2.51308196
  0.93830000   2.05578948
  0.93830000   2.77345297
  0.93830000   1.48096631
  0.93840000   2.58077173
  0.93840000   1.89688606
  0.93840000   2.79057715
  0.93840000   1.44942813
  0.93840000   2.36174143
  0.93840000   2.38216848
  0.93840000   2.33654546
  0.93840000   2.42498897
  0.93840000   2.24616341
  0.93840000   2.57871967
  0.93840000   1.90123610
  0.93840000   2.79165038
  0.93840000   1.44724923
  0.93840000   2.35870514
  0.93840000   2.38800653
  0.93840000   2.32455882
  0.93840000   2.44719994
  0.93840000   2.19812820
  0.93840000   2.64573552
  0.93840000   1.74924044
  0.93840000   2.70677500
  0.93840000   1.61847721
  0.93840000   2.57721379
  0.93840000   1.90920675
  0.93850000   2.42981510
  0.93850000   2.23752923
  0.93850000   2.59274831
  0.93850000   1.86968166
  0.93850000   2.78257217
  0.93850000   1.46473426
  0.93850000   2.38395508
  0.93850000   2.33811073
  0.93850000   2.42333056
  0.93850000   2.25035396
  0.93850000   2.57311038
  0.93850000   1.91432760
  0.93850000   2.79580268
  0.93850000   1.43962868
  0.93850000   2.34922344
  0.93850000   2.40692954
  0.93850000   2.28583484
  0.93850000   2.51613095
  0.93850000   2.04456552
  0.93850000   2.78034684
  0.93850000   1.46780074
  0.93850000   2.38812582
  0.93850000   2.32935986
  0.93850000   2.43955287
  0.93860000   2.78436496
  0.93860000   1.46147794
  0.93860000   2.38062855
  0.93860000   2.34534920
  0.93860000   2.41010470
  0.93860000   2.27879769
  0.93860000   2.52834179
  0.93860000   2.01697493
  0.93860000   2.79190911
  0.93860000   1.44638173
  0.93860000   2.35975370
  0.93860000   2.38687080
  0.93860000   2.32773341
  0.93860000   2.44240197
  0.93860000   2.20927610
  0.93860000   2.63264752
  0.93860000   1.77890626
  0.93860000   2.73217823
  0.93860000   1.56520884
  0.93860000   2.51629951
  0.93860000   2.04947218
  0.93860000   2.77960693
  0.93860000   1.46962477
  0.93860000   2.39176620
  0.93870000   1.58804313
  0.93870000   2.54525320
  0.93870000   1.98346178
  0.93870000   2.80092731
  0.93870000   1.43051287
  0.93870000   2.33871145
  0.93870000   2.42819495
  0.93870000   2.24165264
  0.93870000   2.58791896
  0.93870000   1.88100158
  0.93870000   2.78904203
  0.93870000   1.45266867
  0.93870000   2.36960648
  0.93870000   2.36790911
  0.93870000   2.36646067
  0.93870000   2.36850327
  0.93870000   2.36415357
  0.93870000   2.37265530
  0.93870000   2.35564448
  0.93870000   2.38925568
  0.93870000   2.32188112
  0.93870000   2.45316835
  0.93870000   2.18576019
  0.93870000   2.66330963
  0.93880000   2.65433993
  0.93880000   1.73450842
  0.93880000   2.69940551
  0.93880000   1.63532859
  0.93880000   2.60099648
  0.93880000   1.85561210
  0.93880000   2.78041980
  0.93880000   1.46955562
  0.93880000   2.39397392
  0.93880000   2.31892789
  0.93880000   2.46056932
  0.93880000   2.17052050
  0.93880000   2.68243045
  0.93880000   1.66890699
  0.93880000   2.63682760
  0.93880000   1.77352339
  0.93880000   2.73079975
  0.93880000   1.56863788
  0.93880000   2.52290990
  0.93880000   2.03500362
  0.93880000   2.78806755
  0.93880000   1.45402341
  0.93880000   2.37261446
  0.93880000   2.36231922
  0.93890000   2.33541995
  0.93890000   2.43554474
  0.93890000   2.22662508
  0.93890000   2.61131781
  0.93890000   1.82802943
  0.93890000   2.76745533
  0.93890000   1.49451347
  0.93890000   2.42882390
  0.93890000   2.24553163
  0.93890000   2.58404010
  0.93890000   1.89047929
  0.93890000   2.79445139
  0.93890000   1.44284419
  0.93890000   2.35821540
  0.93890000   2.39143548
  0.93890000   2.31971449
  0.93890000   2.45880864
  0.93890000   2.17436342
  0.93890000   2.67863979
  0.93890000   1.67716568
  0.93890000   2.64646391
  0.93890000   1.75184656
  0.93890000   2.71507871
  0.93890000   1.60169711
  0.93900000   2.47814548
  0.93900000   2.13726917
  0.93900000   2.71992433
  0.93900000   1.58949198
  0.93900000   2.55054862
  0.93900000   1.97192824
  0.93900000   2.80537124
  0.93900000   1.42289173
  0.93900000   2.33130690
  0.93900000   2.44369468
  0.93900000   2.20917699
  0.93900000   2.63613841
  0.93900000   1.77192435
  0.93900000   2.73187571
  0.93900000   1.56645031
  0.93900000   2.52257204
  0.93900000   2.03624173
  0.93900000   2.78955899
  0.93900000   1.45146738
  0.93900000   2.37133859
  0.93900000   2.36580154
  0.93900000   2.37202757
  0.93900000   2.35875165
  0.93900000   2.38484466
  0.93910000   1.55412819
  0.93910000   2.50844787
  0.93910000   2.06891862
  0.93910000   2.77413728
  0.93910000   1.48072996
  0.93910000   2.41258956
  0.93910000   2.28102424
  0.93910000   2.52864136
  0.93910000   2.01791332
  0.93910000   2.79685845
  0.93910000   1.43795379
  0.93910000   2.35362708
  0.93910000   2.40133714
  0.93910000   2.29998712
  0.93910000   2.49529722
  0.93910000   2.09340642
  0.93910000   2.75717888
  0.93910000   1.51326143
  0.93910000   2.45593687
  0.93910000   2.18672793
  0.93910000   2.66619518
  0.93910000   1.70511176
  0.93910000   2.67627782
  0.93910000   1.68575593
  0.93920000   1.62558266
  0.93920000   2.59483053
  0.93920000   1.87018572
  0.93920000   2.79115286
  0.93920000   1.44967981
  0.93920000   2.37113073
  0.93920000   2.36728373
  0.93920000   2.37011365
  0.93920000   2.36359837
  0.93920000   2.37629775
  0.93920000   2.35070083
  0.93920000   2.40141467
  0.93920000   2.29886332
  0.93920000   2.49733824
  0.93920000   2.08877603
  0.93920000   2.76131743
  0.93920000   1.50512291
  0.93920000   2.44636131
  0.93920000   2.20812161
  0.93920000   2.63941878
  0.93920000   1.76490530
  0.93920000   2.72893186
  0.93920000   1.57276221
  0.93920000   2.53268570
  0.93930000   2.67317240
  0.93930000   1.69328916
  0.93930000   2.66749816
  0.93930000   1.70588208
  0.93930000   2.67957477
  0.93930000   1.67918311
  0.93930000   2.65349425
  0.93930000   1.73712741
  0.93930000   2.70770027
  0.93930000   1.61812885
  0.93930000   2.58764785
  0.93930000   1.88718940
  0.93930000   2.79834634
  0.93930000   1.43649050
  0.93930000   2.35383767
  0.93930000   2.40206539
  0.93930000   2.29938162
  0.93930000   2.49756973
  0.93930000   2.08886778
  0.93930000   2.76231489
  0.93930000   1.50339695
  0.93930000   2.44524312
  0.93930000   2.21099507
  0.93930000   2.63631919
  0.93940000   2.24418143
  0.93940000   2.58891959
  0.93940000   1.88009285
  0.93940000   2.79686623
  0.93940000   1.43910625
  0.93940000   2.35862592
  0.93940000   2.39308767
  0.93940000   2.31848192
  0.93940000   2.46383374
  0.93940000   2.16491201
  0.93940000   2.69348928
  0.93940000   1.64560425
  0.93940000   2.61936633
  0.93940000   1.81415622
  0.93940000   2.76549823
  0.93940000   1.49913307
  0.93940000   2.44075867
  0.93940000   2.22141034
  0.93940000   2.62274533
  0.93940000   1.80299019
  0.93940000   2.75837145
  0.93940000   1.51305407
  0.93940000   2.45917432
  0.93940000   2.18074093
  0.93950000   2.50109059
  0.93950000   2.08691975
  0.93950000   2.76635596
  0.93950000   1.49624711
  0.93950000   2.43807427
  0.93950000   2.22766867
  0.93950000   2.61459923
  0.93950000   1.82175458
  0.93950000   2.77105278
  0.93950000   1.48828152
  0.93950000   2.42737787
  0.93950000   2.25090065
  0.93950000   2.57979773
  0.93950000   1.90133761
  0.93950000   2.80433656
  0.93950000   1.42549060
  0.93950000   2.34055972
  0.93950000   2.42865465
  0.93950000   2.24352365
  0.93950000   2.59041761
  0.93950000   1.87665857
  0.93950000   2.79675555
  0.93950000   1.43932316
  0.93950000   2.36004131
  0.93960000   2.68576995
  0.93960000   1.66580658
  0.93960000   2.64339103
  0.93960000   1.76029389
  0.93960000   2.73037068
  0.93960000   1.57069148
  0.93960000   2.53493354
  0.93960000   2.00949274
  0.93960000   2.80505965
  0.93960000   1.42406663
  0.93960000   2.33967516
  0.93960000   2.43094236
  0.93960000   2.23902632
  0.93960000   2.59793699
  0.93960000   1.85967256
  0.93960000   2.79126511
  0.93960000   1.44972106
  0.93960000   2.37569885
  0.93960000   2.35974073
  0.93960000   2.38686504
  0.93960000   2.33123727
  0.93960000   2.44083025
  0.93960000   2.21607034
  0.93960000   2.63057685
  0.93970000   2.17165345
  0.93970000   2.68828673
  0.93970000   1.65732202
  0.93970000   2.63558151
  0.93970000   1.77780688
  0.93970000   2.74481445
  0.93970000   1.54098918
  0.93970000   2.49889227
  0.93970000   2.09233844
  0.93970000   2.76425875
  0.93970000   1.50045704
  0.93970000   2.44599318
  0.93970000   2.21091278
  0.93970000   2.63945240
  0.93970000   1.76569770
  0.93970000   2.73560318
  0.93970000   1.55963811
  0.93970000   2.52240413
  0.93970000   2.03840772
  0.93970000   2.79566068
  0.93970000   1.44102857
  0.93970000   2.36469672
  0.93970000   2.38235453
  0.93970000   2.34179288
  0.93980000   1.67585820
  0.93980000   2.65608390
  0.93980000   1.73180455
  0.93980000   2.70913444
  0.93980000   1.61565477
  0.93980000   2.59081302
  0.93980000   1.88083890
  0.93980000   2.80205543
  0.93980000   1.43041838
  0.93980000   2.35090738
  0.93980000   2.41026812
  0.93980000   2.28412996
  0.93980000   2.52693051
  0.93980000   2.02325363
  0.93980000   2.80214217
  0.93980000   1.42911770
  0.93980000   2.34904798
  0.93980000   2.41366282
  0.93980000   2.27675205
  0.93980000   2.53927443
  0.93980000   1.99481414
  0.93980000   2.81012470
  0.93980000   1.41491929
  0.93980000   2.32887015
  0.93990000   1.59446863
  0.93990000   2.56720852
  0.93990000   1.93539480
  0.93990000   2.81504062
  0.93990000   1.40711233
  0.93990000   2.31883046
  0.93990000   2.47174106
  0.93990000   2.15015125
  0.93990000   2.71401045
  0.93990000   1.60268289
  0.93990000   2.57688778
  0.93990000   1.91290281
  0.93990000   2.81175801
  0.93990000   1.41292948
  0.93990000   2.32715774
  0.93990000   2.45619911
  0.93990000   2.18470710
  0.93990000   2.67444023
  0.93990000   1.68786563
  0.93990000   2.66930139
  0.93990000   1.70229423
  0.93990000   2.68338782
  0.93990000   1.67140636
  0.93990000   2.65279373
  0.94000000   1.59236433
  0.94000000   2.56589906
  0.94000000   1.93863369
  0.94000000   2.81642519
  0.94000000   1.40481146
  0.94000000   2.31663397
  0.94000000   2.47632725
  0.94000000   2.14016933
  0.94000000   2.72508826
  0.94000000   1.57961720
  0.94000000   2.55053986
  0.94000000   1.97408401
  0.94000000   2.81593905
  0.94000000   1.40540919
  0.94000000   2.31748543
  0.94000000   2.47467399
  0.94000000   2.14380003
  0.94000000   2.72136945
  0.94000000   1.58729821
  0.94000000   2.55980768
  0.94000000   1.95257218
  0.94000000   2.81692138
  0.94000000   1.40376075
  0.94000000   2.31510933
  0.94010000   1.77826880
  0.94010000   2.74984625
  0.94010000   1.53113391
  0.94010000   2.49093485
  0.94010000   2.11159418
  0.94010000   2.75275391
  0.94010000   1.52361295
  0.94010000   2.48116416
  0.94010000   2.13363708
  0.94010000   2.73278191
  0.94010000   1.56399506
  0.94010000   2.53255046
  0.94010000   2.01593622
  0.94010000   2.80821821
  0.94010000   1.41895097
  0.94010000   2.33798599
  0.94010000   2.43666648
  0.94010000   2.22833294
  0.94010000   2.61714153
  0.94010000   1.81659850
  0.94010000   2.77512395
  0.94010000   1.48103881
  0.94010000   2.42447612
  0.94010000   2.25933350
  0.94020000   2.81023839
  0.94020000   1.41538835
  0.94020000   2.33402255
  0.94020000   2.44479673
  0.94020000   2.21093452
  0.94020000   2.64253675
  0.94020000   1.75930850
  0.94020000   2.73666350
  0.94020000   1.55807261
  0.94020000   2.52637115
  0.94020000   2.03055863
  0.94020000   2.80400050
  0.94020000   1.42658035
  0.94020000   2.34995705
  0.94020000   2.41397348
  0.94020000   2.27773192
  0.94020000   2.54013569
  0.94020000   1.99379844
  0.94020000   2.81457991
  0.94020000   1.40763829
  0.94020000   2.32289670
  0.94020000   2.46559843
  0.94020000   2.16464398
  0.94020000   2.70051168
  0.94030000   2.43258696
  0.94030000   2.24274435
  0.94030000   2.59782088
  0.94030000   1.86155376
  0.94030000   2.80034425
  0.94030000   1.43404974
  0.94030000   2.36165531
  0.94030000   2.39138597
  0.94030000   2.32584318
  0.94030000   2.45502082
  0.94030000   2.18742986
  0.94030000   2.67380299
  0.94030000   1.68959660
  0.94030000   2.67584211
  0.94030000   1.68830547
  0.94030000   2.67466751
  0.94030000   1.69114746
  0.94030000   2.67748751
  0.94030000   1.68497869
  0.94030000   2.67139616
  0.94030000   1.69847716
  0.94030000   2.68461854
  0.94030000   1.66932033
  0.94030000   2.65549943
  0.94040000   2.11518632
  0.94040000   2.75197686
  0.94040000   1.52537732
  0.94040000   2.48697507
  0.94040000   2.12135100
  0.94040000   2.74686866
  0.94040000   1.53570912
  0.94040000   2.50034185
  0.94040000   2.09083331
  0.94040000   2.77180403
  0.94040000   1.48660403
  0.94040000   2.43548843
  0.94040000   2.23646926
  0.94040000   2.60781886
  0.94040000   1.83864572
  0.94040000   2.79087499
  0.94040000   1.45159312
  0.94040000   2.38738623
  0.94040000   2.33929695
  0.94040000   2.43069495
  0.94040000   2.24148451
  0.94040000   2.59930857
  0.94040000   1.85771525
  0.94040000   2.79975610
  0.94050000   2.74961610
  0.94050000   1.52996138
  0.94050000   2.49408189
  0.94050000   2.10533759
  0.94050000   2.76145971
  0.94050000   1.50679137
  0.94050000   2.46370576
  0.94050000   2.17420118
  0.94050000   2.69239395
  0.94050000   1.64971174
  0.94050000   2.63713205
  0.94050000   1.77556232
  0.94050000   2.75281656
  0.94050000   1.52578904
  0.94050000   2.48869354
  0.94050000   2.11782451
  0.94050000   2.75089677
  0.94050000   1.52771242
  0.94050000   2.49117335
  0.94050000   2.11200330
  0.94050000   2.75588901
  0.94050000   1.51773170
  0.94050000   2.47813861
  0.94050000   2.14159679
  0.94060000   2.14057083
  0.94060000   2.73025540
  0.94060000   1.56982893
  0.94060000   2.54571986
  0.94060000   1.98670114
  0.94060000   2.82069490
  0.94060000   1.39799026
  0.94060000   2.31343859
  0.94060000   2.48545242
  0.94060000   2.12133025
  0.94060000   2.74820777
  0.94060000   1.53304596
  0.94060000   2.49924970
  0.94060000   2.09381028
  0.94060000   2.77140112
  0.94060000   1.48756525
  0.94060000   2.43909383
  0.94060000   2.22922527
  0.94060000   2.61991463
  0.94060000   1.81130757
  0.94060000   2.77794488
  0.94060000   1.47631411
  0.94060000   2.42379460
  0.94060000   2.26272133
  0.94070000   2.22554154
  0.94070000   2.62554408
  0.94070000   1.79857269
  0.94070000   2.77109851
  0.94070000   1.48973615
  0.94070000   2.44319713
  0.94070000   2.22068071
  0.94070000   2.63308014
  0.94070000   1.78162599
  0.94070000   2.75949408
  0.94070000   1.51252840
  0.94070000   2.47364125
  0.94070000   2.15254844
  0.94070000   2.71855686
  0.94070000   1.59420993
  0.94070000   2.57646012
  0.94070000   1.91549402
  0.94070000   2.82132910
  0.94070000   1.39732459
  0.94070000   2.31357404
  0.94070000   2.48571473
  0.94070000   2.12096804
  0.94070000   2.74937097
  0.94070000   1.53077159
  0.94080000   1.43422162
  0.94080000   2.36752583
  0.94080000   2.38174758
  0.94080000   2.34787569
  0.94080000   2.41524941
  0.94080000   2.27615062
  0.94080000   2.54609983
  0.94080000   1.98120268
  0.94080000   2.82315476
  0.94080000   1.39368485
  0.94080000   2.30938835
  0.94080000   2.49379051
  0.94080000   2.10281383
  0.94080000   2.76578701
  0.94080000   1.49845940
  0.94080000   2.45606759
  0.94080000   2.19217612
  0.94080000   2.67240054
  0.94080000   1.69367212
  0.94080000   2.68593196
  0.94080000   1.66683094
  0.94080000   2.65895601
  0.94080000   1.72684401
  0.94080000   2.71689675
  0.94090000   2.78847862
  0.94090000   1.45683443
  0.94090000   2.40039174
  0.94090000   2.31422959
  0.94090000   2.48063519
  0.94090000   2.13216213
  0.94090000   2.74042958
  0.94090000   1.54897118
  0.94090000   2.52316215
  0.94090000   2.03951876
  0.94090000   2.80714835
  0.94090000   1.42178616
  0.94090000   2.35099018
  0.94090000   2.41535335
  0.94090000   2.27747975
  0.94090000   2.54483464
  0.94090000   1.98453739
  0.94090000   2.82374508
  0.94090000   1.39283864
  0.94090000   2.30926445
  0.94090000   2.49457478
  0.94090000   2.10129839
  0.94090000   2.76790515
  0.94090000   1.49444930
  0.94100000   1.56141829
  0.94100000   2.54007867
  0.94100000   2.00094401
  0.94100000   2.82197883
  0.94100000   1.39635347
  0.94100000   2.31550240
  0.94100000   2.48389202
  0.94100000   2.12607686
  0.94100000   2.74735304
  0.94100000   1.53524404
  0.94100000   2.50679905
  0.94100000   2.07759555
  0.94100000   2.78668844
  0.94100000   1.45910712
  0.94100000   2.40468366
  0.94100000   2.30537607
  0.94100000   2.49725199
  0.94100000   2.09454919
  0.94100000   2.77392323
  0.94100000   1.48289212
  0.94100000   2.43736181
  0.94100000   2.23436187
  0.94100000   2.61499853
  0.94100000   1.82312480
  0.94110000   2.38258617
  0.94110000   2.34675186
  0.94110000   2.41876452
  0.94110000   2.26969096
  0.94110000   2.55879139
  0.94110000   1.95252484
  0.94110000   2.82862915
  0.94110000   1.38503455
  0.94110000   2.30009472
  0.94110000   2.51232527
  0.94110000   2.06125292
  0.94110000   2.79750374
  0.94110000   1.43918045
  0.94110000   2.37792454
  0.94110000   2.36186898
  0.94110000   2.38968988
  0.94110000   2.33180411
  0.94110000   2.44755818
  0.94110000   2.20645948
  0.94110000   2.65473822
  0.94110000   1.73284634
  0.94110000   2.72562056
  0.94110000   1.58195264
  0.94110000   2.56651178
  0.94120000   2.28909203
  0.94120000   2.52752592
  0.94120000   2.02565752
  0.94120000   2.81564771
  0.94120000   1.40714784
  0.94120000   2.33334009
  0.94120000   2.45123750
  0.94120000   2.20005233
  0.94120000   2.66462042
  0.94120000   1.71128866
  0.94120000   2.70755137
  0.94120000   1.62051447
  0.94120000   2.61320569
  0.94120000   1.83158653
  0.94120000   2.79692327
  0.94120000   1.44174791
  0.94120000   2.38268827
  0.94120000   2.35262196
  0.94120000   2.40869975
  0.94120000   2.29205326
  0.94120000   2.52118121
  0.94120000   2.03971925
  0.94120000   2.80944182
  0.94120000   1.41775330
  0.94130000   2.39141579
  0.94130000   2.33011048
  0.94130000   2.45229203
  0.94130000   2.19692049
  0.94130000   2.66923934
  0.94130000   1.70104264
  0.94130000   2.69911413
  0.94130000   1.63878497
  0.94130000   2.63494115
  0.94130000   1.78195413
  0.94130000   2.76713086
  0.94130000   1.49846638
  0.94130000   2.46192190
  0.94130000   2.18095530
  0.94130000   2.69054153
  0.94130000   1.65473683
  0.94130000   2.65222532
  0.94130000   1.74259263
  0.94130000   2.73654455
  0.94130000   1.55989680
  0.94130000   2.54171915
  0.94130000   1.99768117
  0.94130000   2.82585804
  0.94130000   1.39010081
  0.94140000   1.38167593
  0.94140000   2.29849636
  0.94140000   2.51705369
  0.94140000   2.05127734
  0.94140000   2.80605992
  0.94140000   1.42429065
  0.94140000   2.36019182
  0.94140000   2.39945703
  0.94140000   2.31344875
  0.94140000   2.48401610
  0.94140000   2.12564117
  0.94140000   2.75088752
  0.94140000   1.52838543
  0.94140000   2.50260783
  0.94140000   2.08821417
  0.94140000   2.78293673
  0.94140000   1.46654346
  0.94140000   2.41956252
  0.94140000   2.27488131
  0.94140000   2.55295711
  0.94140000   1.96707029
  0.94140000   2.83134886
  0.94140000   1.38090698
  0.94140000   2.29734952
  0.94150000   2.50082394
  0.94150000   2.08883964
  0.94150000   2.78314009
  0.94150000   1.46625291
  0.94150000   2.42031970
  0.94150000   2.27369655
  0.94150000   2.55565227
  0.94150000   1.96112596
  0.94150000   2.83288325
  0.94150000   1.37861113
  0.94150000   2.29508463
  0.94150000   2.52361911
  0.94150000   2.03627965
  0.94150000   2.81435189
  0.94150000   1.40980796
  0.94150000   2.34052347
  0.94150000   2.43883917
  0.94150000   2.22850581
  0.94150000   2.62663510
  0.94150000   1.79717342
  0.94150000   2.77975508
  0.94150000   1.47400270
  0.94150000   2.43098989
  0.94150000   2.25034111
  0.94160000   2.71451069
  0.94160000   1.60634666
  0.94160000   2.60166972
  0.94160000   1.85904270
  0.94160000   2.81480976
  0.94160000   1.41027281
  0.94160000   2.34232746
  0.94160000   2.43603311
  0.94160000   2.23520197
  0.94160000   2.61739221
  0.94160000   1.81853780
  0.94160000   2.79421193
  0.94160000   1.44705813
  0.94160000   2.39469983
  0.94160000   2.32910910
  0.94160000   2.45641818
  0.94160000   2.18884605
  0.94160000   2.68204449
  0.94160000   1.67321370
  0.94160000   2.67518328
  0.94160000   1.69153670
  0.94160000   2.69365968
  0.94160000   1.65118625
  0.94160000   2.65211599
  0.94170000   1.55898062
  0.94170000   2.54531527
  0.94170000   1.99015232
  0.94170000   2.83177432
  0.94170000   1.38089236
  0.94170000   2.30065165
  0.94170000   2.51492177
  0.94170000   2.05695288
  0.94170000   2.80587912
  0.94170000   1.42497661
  0.94170000   2.36454929
  0.94170000   2.39203529
  0.94170000   2.33034428
  0.94170000   2.45379985
  0.94170000   2.19476389
  0.94170000   2.67500876
  0.94170000   1.68873309
  0.94170000   2.69201358
  0.94170000   1.65464755
  0.94170000   2.65702682
  0.94170000   1.73245492
  0.94170000   2.73276741
  0.94170000   1.56819986
  0.94170000   2.55683292
  0.94180000   2.29905890
  0.94180000   2.51846439
  0.94180000   2.04911691
  0.94180000   2.81118083
  0.94180000   1.41582296
  0.94180000   2.35255953
  0.94180000   2.41669462
  0.94180000   2.27813280
  0.94180000   2.54928353
  0.94180000   1.97630318
  0.94180000   2.83467899
  0.94180000   1.37599351
  0.94180000   2.29452683
  0.94180000   2.52632785
  0.94180000   2.03072869
  0.94180000   2.81979312
  0.94180000   1.40083908
  0.94180000   2.33089017
  0.94180000   2.45900714
  0.94180000   2.18460603
  0.94180000   2.68922649
  0.94180000   1.65792909
  0.94180000   2.66167382
  0.94180000   1.72196815
  0.94190000   2.59177628
  0.94190000   1.87805657
  0.94190000   2.82522501
  0.94190000   1.39244229
  0.94190000   2.31977748
  0.94190000   2.48077264
  0.94190000   2.13578741
  0.94190000   2.74565835
  0.94190000   1.53968041
  0.94190000   2.52314388
  0.94190000   2.04211956
  0.94190000   2.81593630
  0.94190000   1.40773097
  0.94190000   2.34200140
  0.94190000   2.43801141
  0.94190000   2.23178060
  0.94190000   2.62454107
  0.94190000   1.80259698
  0.94190000   2.78808941
  0.94190000   1.45881192
  0.94190000   2.41457115
  0.94190000   2.28771603
  0.94190000   2.53390076
  0.94190000   2.01239573
  0.94200000   2.33878077
  0.94200000   2.44494445
  0.94200000   2.21688827
  0.94200000   2.64723714
  0.94200000   1.75137369
  0.94200000   2.75217770
  0.94200000   1.52880538
  0.94200000   2.51026885
  0.94200000   2.07243303
  0.94200000   2.79967898
  0.94200000   1.43659011
  0.94200000   2.38447863
  0.94200000   2.35230845
  0.94200000   2.41317940
  0.94200000   2.28556860
  0.94200000   2.53730032
  0.94200000   2.00437415
  0.94200000   2.83088417
  0.94200000   1.38234743
  0.94200000   2.30607732
  0.94200000   2.50654864
  0.94200000   2.07684600
  0.94200000   2.79625372
  0.94200000   1.44252780
  0.94210000   1.54117747
  0.94210000   2.52746996
  0.94210000   2.03274647
  0.94210000   2.82236293
  0.94210000   1.39712816
  0.94210000   2.32884780
  0.94210000   2.46464448
  0.94210000   2.17301160
  0.94210000   2.70603208
  0.94210000   1.62221368
  0.94210000   2.62598246
  0.94210000   1.80354900
  0.94210000   2.79131533
  0.94210000   1.45336007
  0.94210000   2.40926089
  0.94210000   2.30011525
  0.94210000   2.51307696
  0.94210000   2.06117812
  0.94210000   2.80707328
  0.94210000   1.42320478
  0.94210000   2.36651399
  0.94210000   2.38978465
  0.94210000   2.33668440
  0.94210000   2.44355251
  0.94220000   2.51554224
  0.94220000   2.06083048
  0.94220000   2.80891033
  0.94220000   1.42048374
  0.94220000   2.36376229
  0.94220000   2.39607001
  0.94220000   2.32399077
  0.94220000   2.46861822
  0.94220000   2.16307196
  0.94220000   2.71825225
  0.94220000   1.59624739
  0.94220000   2.59688591
  0.94220000   1.87083418
  0.94220000   2.82641391
  0.94220000   1.39105778
  0.94220000   2.32107945
  0.94220000   2.47991752
  0.94220000   2.13858547
  0.94220000   2.74533238
  0.94220000   1.54063834
  0.94220000   2.52792183
  0.94220000   2.03168871
  0.94220000   2.82370988
  0.94220000   1.39484645
  0.94230000   2.70162424
  0.94230000   1.63215958
  0.94230000   2.63967721
  0.94230000   1.77266084
  0.94230000   2.77250179
  0.94230000   1.48937834
  0.94230000   2.46129521
  0.94230000   2.18568174
  0.94230000   2.69239998
  0.94230000   1.65201345
  0.94230000   2.66147382
  0.94230000   1.72328496
  0.94230000   2.73201927
  0.94230000   1.57056409
  0.94230000   2.56694777
  0.94230000   1.94111578
  0.94230000   2.84223482
  0.94230000   1.36501651
  0.94230000   2.28376976
  0.94230000   2.54835305
  0.94230000   1.98085130
  0.94230000   2.83960800
  0.94230000   1.36889453
  0.94230000   2.28952347
  0.94240000   1.45494278
  0.94240000   2.41492777
  0.94240000   2.28903272
  0.94240000   2.53469447
  0.94240000   2.01189757
  0.94240000   2.83291803
  0.94240000   1.37974016
  0.94240000   2.30666833
  0.94240000   2.50784203
  0.94240000   2.07504581
  0.94240000   2.80134590
  0.94240000   1.43393348
  0.94240000   2.38523930
  0.94240000   2.35239251
  0.94240000   2.41491230
  0.94240000   2.28334149
  0.94240000   2.54356591
  0.94240000   1.99071630
  0.94240000   2.83851369
  0.94240000   1.37054487
  0.94240000   2.29305768
  0.94240000   2.53237566
  0.94240000   2.01807918
  0.94240000   2.83085902
  0.94250000   2.43178579
  0.94250000   2.24782585
  0.94250000   2.60388121
  0.94250000   1.85114393
  0.94250000   2.82171622
  0.94250000   1.39940483
  0.94250000   2.33661377
  0.94250000   2.45165979
  0.94250000   2.20350040
  0.94250000   2.66961839
  0.94250000   1.70195093
  0.94250000   2.71463346
  0.94250000   1.60707559
  0.94250000   2.61336428
  0.94250000   1.83344065
  0.94250000   2.81339577
  0.94250000   1.41405353
  0.94250000   2.35787108
  0.94250000   2.40944155
  0.94250000   2.29652896
  0.94250000   2.52107194
  0.94250000   2.04337841
  0.94250000   2.82070106
  0.94250000   1.40006903
  0.94260000   1.38153595
  0.94260000   2.31153737
  0.94260000   2.50005183
  0.94260000   2.09365176
  0.94260000   2.78967438
  0.94260000   1.45547260
  0.94260000   2.41794820
  0.94260000   2.28308478
  0.94260000   2.54623948
  0.94260000   1.98540435
  0.94260000   2.84185610
  0.94260000   1.36565322
  0.94260000   2.28799662
  0.94260000   2.54263108
  0.94260000   1.99477800
  0.94260000   2.83999682
  0.94260000   1.36867463
  0.94260000   2.29248943
  0.94260000   2.53466398
  0.94260000   2.01331616
  0.94260000   2.83463266
  0.94260000   1.37726648
  0.94260000   2.30521826
  0.94260000   2.51158476
  0.94270000   2.35215558
  0.94270000   2.42187634
  0.94270000   2.27029280
  0.94270000   2.56821243
  0.94270000   1.93422151
  0.94270000   2.84592413
  0.94270000   1.35960089
  0.94270000   2.28007111
  0.94270000   2.55714753
  0.94270000   1.96122494
  0.94270000   2.84618202
  0.94270000   1.35919719
  0.94270000   2.27947095
  0.94270000   2.55820537
  0.94270000   1.95876459
  0.94270000   2.84632376
  0.94270000   1.35897727
  0.94270000   2.27914086
  0.94270000   2.55876252
  0.94270000   1.95744868
  0.94270000   2.84637916
  0.94270000   1.35888198
  0.94270000   2.27899677
  0.94270000   2.55899532
  0.94280000   2.55375930
  0.94280000   1.96949012
  0.94280000   2.84662540
  0.94280000   1.35872057
  0.94280000   2.27986058
  0.94280000   2.55822170
  0.94280000   1.95902572
  0.94280000   2.84744948
  0.94280000   1.35743746
  0.94280000   2.27793750
  0.94280000   2.56151286
  0.94280000   1.95131312
  0.94280000   2.84770124
  0.94280000   1.35705061
  0.94280000   2.27735551
  0.94280000   2.56248943
  0.94280000   1.94900592
  0.94280000   2.84770924
  0.94280000   1.35702662
  0.94280000   2.27731710
  0.94280000   2.56253226
  0.94280000   1.94888047
  0.94280000   2.84769770
  0.94290000   2.56522650
  0.94290000   1.94298767
  0.94290000   2.84882756
  0.94290000   1.35558110
  0.94290000   2.27625541
  0.94290000   2.56508327
  0.94290000   1.94325505
  0.94290000   2.84880452
  0.94290000   1.35557313
  0.94290000   2.27623888
  0.94290000   2.56506684
  0.94290000   1.94324638
  0.94290000   2.84878320
  0.94290000   1.35557556
  0.94290000   2.27623913
  0.94290000   2.56503341
  0.94290000   1.94328938
  0.94290000   2.84876838
  0.94290000   1.35557509
  0.94290000   2.27623586
  0.94290000   2.56501366
  0.94290000   1.94330837
  0.94290000   2.84875650
  0.94300000   2.56751760
  0.94300000   1.93785142
  0.94300000   2.84975337
  0.94300000   1.35433921
  0.94300000   2.27548515
  0.94300000   2.56702585
  0.94300000   1.93893302
  0.94300000   2.84977548
  0.94300000   1.35425827
  0.94300000   2.27535925
  0.94300000   2.56719766
  0.94300000   1.93848587
  0.94300000   2.84973450
  0.94300000   1.35429334
  0.94300000   2.27540850
  0.94300000   2.56708042
  0.94300000   1.93872462
  0.94300000   2.84972989
  0.94300000   1.35427630
  0.94300000   2.27538039
  0.94300000   2.56710346
  0.94300000   1.93864400
  0.94300000   2.84971410
  0.94310000   1.42378151
  0.94310000   2.37866733
  0.94310000   2.36944485
  0.94310000   2.38368975
  0.94310000   2.35313169
  0.94310000   2.41581643
  0.94310000   2.28374521
  0.94310000   2.54694181
  0.94310000   1.98437690
  0.94310000   2.84727357
  0.94310000   1.35783261
  0.94310000   2.28179198
  0.94310000   2.55647358
  0.94310000   1.96356464
  0.94310000   2.85035996
  0.94310000   1.35331875
  0.94310000   2.27503160
  0.94310000   2.56827709
  0.94310000   1.93607804
  0.94310000   2.85069202
  0.94310000   1.35294248
  0.94310000   2.27446664
  0.94310000   2.56926147
  0.94310000   1.93378648
  0.94320000   2.66204157
  0.94320000   1.71973824
  0.94320000   2.73971439
  0.94320000   1.55563358
  0.94320000   2.55901102
  0.94320000   1.96156491
  0.94320000   2.85190906
  0.94320000   1.35131163
  0.94320000   2.27311649
  0.94320000   2.57228696
  0.94320000   1.92702442
  0.94320000   2.85114059
  0.94320000   1.35251978
  0.94320000   2.27492759
  0.94320000   2.56914307
  0.94320000   1.93432200
  0.94320000   2.85173149
  0.94320000   1.35155693
  0.94320000   2.27347865
  0.94320000   2.57160607
  0.94320000   1.92855188
  0.94320000   2.85126326
  0.94320000   1.35228564
  0.94320000   2.27457162
  0.94330000   1.80183236
  0.94330000   2.80451439
  0.94330000   1.43080501
  0.94330000   2.39100776
  0.94330000   2.34418657
  0.94330000   2.43577884
  0.94330000   2.24085407
  0.94330000   2.61991634
  0.94330000   1.81534332
  0.94330000   2.81272414
  0.94330000   1.41617667
  0.94330000   2.36994606
  0.94330000   2.38837311
  0.94330000   2.34485281
  0.94330000   2.43356791
  0.94330000   2.24541007
  0.94330000   2.61252746
  0.94330000   1.83220975
  0.94330000   2.82199837
  0.94330000   1.40005656
  0.94330000   2.34649464
  0.94330000   2.43603975
  0.94330000   2.24105739
  0.94330000   2.61975685
  0.94340000   1.35987931
  0.94340000   2.28816332
  0.94340000   2.54731090
  0.94340000   1.98585229
  0.94340000   2.85056614
  0.94340000   1.35353937
  0.94340000   2.27864775
  0.94340000   2.56395525
  0.94340000   1.94687986
  0.94340000   2.85440373
  0.94340000   1.34780716
  0.94340000   2.27001747
  0.94340000   2.57879825
  0.94340000   1.91221808
  0.94340000   2.85140091
  0.94340000   1.35252651
  0.94340000   2.27711808
  0.94340000   2.56658282
  0.94340000   1.94069509
  0.94340000   2.85427798
  0.94340000   1.34798578
  0.94340000   2.27028184
  0.94340000   2.57830365
  0.94350000   1.94508437
  0.94350000   2.85555596
  0.94350000   1.34631556
  0.94350000   2.26886327
  0.94350000   2.58145906
  0.94350000   1.90628419
  0.94350000   2.85148780
  0.94350000   1.35264403
  0.94350000   2.27839152
  0.94350000   2.56503594
  0.94350000   1.94456945
  0.94350000   2.85550321
  0.94350000   1.34632835
  0.94350000   2.26887473
  0.94350000   2.58136261
  0.94350000   1.90642710
  0.94350000   2.85148188
  0.94350000   1.35259814
  0.94350000   2.27831644
  0.94350000   2.56510679
  0.94350000   1.94434064
  0.94350000   2.85547146
  0.94350000   1.34633565
  0.94360000   2.58455931
  0.94360000   1.89933678
  0.94360000   2.85118930
  0.94360000   1.35335590
  0.94360000   2.28055887
  0.94360000   2.56190624
  0.94360000   1.95213796
  0.94360000   2.85657271
  0.94360000   1.34489238
  0.94360000   2.26779739
  0.94360000   2.58384647
  0.94360000   1.90085979
  0.94360000   2.85148067
  0.94360000   1.35282152
  0.94360000   2.27974658
  0.94360000   2.56324456
  0.94360000   1.94892360
  0.94360000   2.85659715
  0.94360000   1.34481562
  0.94360000   2.26767546
  0.94360000   2.58399588
  0.94360000   1.90045009
  0.94360000   2.85136401
  0.94370000   2.85429646
  0.94370000   1.34839857
  0.94370000   2.27418297
  0.94370000   2.57356158
  0.94370000   1.92508096
  0.94370000   2.85662174
  0.94370000   1.34511668
  0.94370000   2.26922349
  0.94370000   2.58206143
  0.94370000   1.90522031
  0.94370000   2.85355768
  0.94370000   1.34981239
  0.94370000   2.27630718
  0.94370000   2.56985220
  0.94370000   1.93369177
  0.94370000   2.85732237
  0.94370000   1.34398199
  0.94370000   2.26750306
  0.94370000   2.58493004
  0.94370000   1.89847301
  0.94370000   2.85207190
  0.94370000   1.35206775
  0.94370000   2.27970023
  0.94380000   1.35059898
  0.94380000   2.27859431
  0.94380000   2.56658430
  0.94380000   1.94164054
  0.94380000   2.85883648
  0.94380000   1.34193749
  0.94380000   2.26550368
  0.94380000   2.58901710
  0.94380000   1.88921604
  0.94380000   2.85091940
  0.94380000   1.35410368
  0.94380000   2.28386326
  0.94380000   2.55723041
  0.94380000   1.96342985
  0.94380000   2.85809168
  0.94380000   1.34289062
  0.94380000   2.26694000
  0.94380000   2.58650693
  0.94380000   1.89498577
  0.94380000   2.85239386
  0.94380000   1.35177170
  0.94380000   2.28034695
  0.94380000   2.56337257
  0.94390000   2.77061707
  0.94390000   1.49291483
  0.94390000   2.48476813
  0.94390000   2.13665188
  0.94390000   2.76232279
  0.94390000   1.50920755
  0.94390000   2.50677909
  0.94390000   2.08549739
  0.94390000   2.80839564
  0.94390000   1.42363058
  0.94390000   2.38751909
  0.94390000   2.35408729
  0.94390000   2.41876555
  0.94390000   2.28070405
  0.94390000   2.55724048
  0.94390000   1.96211347
  0.94390000   2.85900916
  0.94390000   1.34148618
  0.94390000   2.26588818
  0.94390000   2.58879814
  0.94390000   1.88973283
  0.94390000   2.85216065
  0.94390000   1.35228259
  0.94390000   2.28220513
  0.94400000   2.43339692
  0.94400000   2.25420823
  0.94400000   2.60404209
  0.94400000   1.85361815
  0.94400000   2.84061471
  0.94400000   1.37062231
  0.94400000   2.31081409
  0.94400000   2.50913564
  0.94400000   2.07631824
  0.94400000   2.81569326
  0.94400000   1.41097825
  0.94400000   2.37031480
  0.94400000   2.39076250
  0.94400000   2.34274106
  0.94400000   2.44127046
  0.94400000   2.23069023
  0.94400000   2.64033441
  0.94400000   1.76962533
  0.94400000   2.79069211
  0.94400000   1.45687965
  0.94400000   2.43602668
  0.94400000   2.24821135
  0.94400000   2.61369014
  0.94400000   1.83113442
  0.94410000   2.86241656
  0.94410000   1.33729780
  0.94410000   2.26172358
  0.94410000   2.59732179
  0.94410000   1.87046711
  0.94410000   2.84853330
  0.94410000   1.35841113
  0.94410000   2.29363046
  0.94410000   2.54152086
  0.94410000   2.00090473
  0.94410000   2.85427003
  0.94410000   1.34902517
  0.94410000   2.27948462
  0.94410000   2.56669241
  0.94410000   1.94186250
  0.94410000   2.86213955
  0.94410000   1.33754486
  0.94410000   2.26208885
  0.94410000   2.59659671
  0.94410000   1.87204168
  0.94410000   2.84904630
  0.94410000   1.35753935
  0.94410000   2.29231162
  0.94420000   2.58306436
  0.94420000   1.90391728
  0.94420000   2.85908660
  0.94420000   1.34247964
  0.94420000   2.27067374
  0.94420000   2.58273613
  0.94420000   1.90463444
  0.94420000   2.85920980
  0.94420000   1.34226083
  0.94420000   2.27033816
  0.94420000   2.58327517
  0.94420000   1.90333559
  0.94420000   2.85893000
  0.94420000   1.34265531
  0.94420000   2.27093335
  0.94420000   2.58222249
  0.94420000   1.90576299
  0.94420000   2.85940203
  0.94420000   1.34192463
  0.94420000   2.26982304
  0.94420000   2.58410673
  0.94420000   1.90133775
  0.94420000   2.85848657
  0.94430000   2.85251768
  0.94430000   1.35267724
  0.94430000   2.28719284
  0.94430000   2.55436069
  0.94430000   1.97130286
  0.94430000   2.86271554
  0.94430000   1.33702108
  0.94430000   2.26346891
  0.94430000   2.59559624
  0.94430000   1.87479121
  0.94430000   2.85236110
  0.94430000   1.35284472
  0.94430000   2.28743731
  0.94430000   2.55384156
  0.94430000   1.97243605
  0.94430000   2.86251821
  0.94430000   1.33725064
  0.94430000   2.26381209
  0.94430000   2.59495512
  0.94430000   1.87621951
  0.94430000   2.85281040
  0.94430000   1.35211230
  0.94430000   2.28632713
  0.94440000   2.29841433
  0.94440000   2.53440641
  0.94440000   2.01823050
  0.94440000   2.85151162
  0.94440000   1.35368474
  0.94440000   2.28980288
  0.94440000   2.55012166
  0.94440000   1.98136269
  0.94440000   2.86213209
  0.94440000   1.33797533
  0.94440000   2.26600159
  0.94440000   2.59188418
  0.94440000   1.88357522
  0.94440000   2.85628509
  0.94440000   1.34703576
  0.94440000   2.27974805
  0.94440000   2.56808466
  0.94440000   1.93922350
  0.94440000   2.86543559
  0.94440000   1.33333809
  0.94440000   2.25893646
  0.94440000   2.60379232
  0.94440000   1.85584182
  0.94450000   2.86228012
  0.94450000   1.33811665
  0.94450000   2.26731326
  0.94450000   2.59038826
  0.94450000   1.88735525
  0.94450000   2.85857380
  0.94450000   1.34385535
  0.94450000   2.27602536
  0.94450000   2.57529503
  0.94450000   1.92260063
  0.94450000   2.86542842
  0.94450000   1.33365551
  0.94450000   2.26050804
  0.94450000   2.60185488
  0.94450000   1.86057175
  0.94450000   2.84951005
  0.94450000   1.35761106
  0.94450000   2.29681449
  0.94450000   2.53797985
  0.94450000   2.01007599
  0.94450000   2.85551897
  0.94450000   1.34780277
  0.94450000   2.28200063
  0.94460000   2.26951673
  0.94460000   2.58717093
  0.94460000   1.89501585
  0.94460000   2.86171642
  0.94460000   1.33937562
  0.94460000   2.27030869
  0.94460000   2.58584100
  0.94460000   1.89812417
  0.94460000   2.86243638
  0.94460000   1.33829305
  0.94460000   2.26865868
  0.94460000   2.58865332
  0.94460000   1.89152281
  0.94460000   2.86082421
  0.94460000   1.34065836
  0.94460000   2.27225403
  0.94460000   2.58242353
  0.94460000   1.90605523
  0.94460000   2.86406221
  0.94460000   1.33585672
  0.94460000   2.26494366
  0.94460000   2.59495594
  0.94460000   1.87676724
  0.94470000   1.97149860
  0.94470000   2.86703012
  0.94470000   1.33156587
  0.94470000   2.25948940
  0.94470000   2.60486147
  0.94470000   1.85396644
  0.94470000   2.84919238
  0.94470000   1.35851615
  0.94470000   2.30038113
  0.94470000   2.53259155
  0.94470000   2.02323508
  0.94470000   2.85257286
  0.94470000   1.35258349
  0.94470000   2.29142546
  0.94470000   2.54891226
  0.94470000   1.98482641
  0.94470000   2.86464523
  0.94470000   1.33486491
  0.94470000   2.26451718
  0.94470000   2.59627031
  0.94470000   1.87385941
  0.94470000   2.85671749
  0.94470000   1.34696171
  0.94480000   2.32085230
  0.94480000   2.48807418
  0.94480000   2.12604744
  0.94480000   2.78008739
  0.94480000   1.47593018
  0.94480000   2.47193230
  0.94480000   2.16895092
  0.94480000   2.73291240
  0.94480000   1.56929039
  0.94480000   2.59537497
  0.94480000   1.87923491
  0.94480000   2.85977817
  0.94480000   1.34267793
  0.94480000   2.27750123
  0.94480000   2.57448399
  0.94480000   1.92502894
  0.94480000   2.86906029
  0.94480000   1.32901222
  0.94480000   2.25665823
  0.94480000   2.61018274
  0.94480000   1.84170986
  0.94480000   2.84485564
  0.94480000   1.36540776
  0.94490000   2.29815020
  0.94490000   2.53796882
  0.94490000   2.01117995
  0.94490000   2.85937991
  0.94490000   1.34290604
  0.94490000   2.27894901
  0.94490000   2.57255179
  0.94490000   1.92980868
  0.94490000   2.87062371
  0.94490000   1.32703602
  0.94490000   2.25471868
  0.94490000   2.61411168
  0.94490000   1.83283400
  0.94490000   2.84171038
  0.94490000   1.37060277
  0.94490000   2.32074657
  0.94490000   2.49509900
  0.94490000   2.11144375
  0.94490000   2.79537944
  0.94490000   1.44805589
  0.94490000   2.43394062
  0.94490000   2.25607769
  0.94490000   2.60664951
  0.94500000   2.40023940
  0.94500000   2.33136911
  0.94500000   2.46982022
  0.94500000   2.16939608
  0.94500000   2.73330678
  0.94500000   1.56851217
  0.94500000   2.59681066
  0.94500000   1.87622016
  0.94500000   2.86116856
  0.94500000   1.34104404
  0.94500000   2.27719867
  0.94500000   2.57626068
  0.94500000   1.92128333
  0.94500000   2.87095657
  0.94500000   1.32678041
  0.94500000   2.25540425
  0.94500000   2.61359017
  0.94500000   1.83417498
  0.94500000   2.84357731
  0.94500000   1.36780771
  0.94500000   2.31766044
  0.94500000   2.50156346
  0.94500000   2.09661740
  0.94510000   2.61033652
  0.94510000   1.84492410
  0.94510000   2.85009942
  0.94510000   1.35799081
  0.94510000   2.30399713
  0.94510000   2.52818061
  0.94510000   2.03460819
  0.94510000   2.85149966
  0.94510000   1.35492600
  0.94510000   2.29936251
  0.94510000   2.53667650
  0.94510000   2.01453046
  0.94510000   2.86015741
  0.94510000   1.34205683
  0.94510000   2.27983158
  0.94510000   2.57212013
  0.94510000   1.93114084
  0.94510000   2.87294065
  0.94510000   1.32416098
  0.94510000   2.25246336
  0.94510000   2.61909954
  0.94510000   1.82157438
  0.94510000   2.83811341
  0.94520000   2.29072829
  0.94520000   2.55324187
  0.94520000   1.97587569
  0.94520000   2.87180693
  0.94520000   1.32583952
  0.94520000   2.25613076
  0.94520000   2.61371817
  0.94520000   1.83427593
  0.94520000   2.84605238
  0.94520000   1.36434697
  0.94520000   2.31467781
  0.94520000   2.50843632
  0.94520000   2.08114142
  0.94520000   2.82353315
  0.94520000   1.39952289
  0.94520000   2.36707609
  0.94520000   2.40301475
  0.94520000   2.32121689
  0.94520000   2.48983969
  0.94520000   2.12321215
  0.94520000   2.78642231
  0.94520000   1.46464417
  0.94520000   2.46083554
  0.94530000   2.29923240
  0.94530000   2.53826204
  0.94530000   2.01142435
  0.94530000   2.86346136
  0.94530000   1.33773414
  0.94530000   2.27542957
  0.94530000   2.58120372
  0.94530000   1.91029944
  0.94530000   2.87289086
  0.94530000   1.32477622
  0.94530000   2.25557407
  0.94530000   2.61529193
  0.94530000   1.83077735
  0.94530000   2.84546342
  0.94530000   1.36543433
  0.94530000   2.31741808
  0.94530000   2.50368523
  0.94530000   2.09250285
  0.94530000   2.81550864
  0.94530000   1.41320552
  0.94530000   2.38828185
  0.94530000   2.35837474
  0.94530000   2.41660679
  0.94540000   2.32326577
  0.94540000   2.49301077
  0.94540000   2.11785411
  0.94540000   2.79388078
  0.94540000   1.45157101
  0.94540000   2.44472608
  0.94540000   2.23351859
  0.94540000   2.64664397
  0.94540000   1.75790273
  0.94540000   2.79894946
  0.94540000   1.44402746
  0.94540000   2.43397752
  0.94540000   2.25798224
  0.94540000   2.60677423
  0.94540000   1.84964950
  0.94540000   2.85552608
  0.94540000   1.35005837
  0.94540000   2.29527219
  0.94540000   2.54595922
  0.94540000   1.99332488
  0.94540000   2.87009698
  0.94540000   1.32847032
  0.94540000   2.26232307
  0.94550000   2.65620154
  0.94550000   1.73992155
  0.94550000   2.78573070
  0.94550000   1.46870633
  0.94550000   2.47007290
  0.94550000   2.17580664
  0.94550000   2.73001488
  0.94550000   1.57629070
  0.94550000   2.61256522
  0.94550000   1.84038440
  0.94550000   2.85274081
  0.94550000   1.35468584
  0.94550000   2.30339794
  0.94550000   2.53150564
  0.94550000   2.02768878
  0.94550000   2.85879864
  0.94550000   1.34476942
  0.94550000   2.28833339
  0.94550000   2.55922141
  0.94550000   1.96229008
  0.94550000   2.87683827
  0.94550000   1.31952483
  0.94550000   2.24964456
  0.94560000   2.63229198
  0.94560000   1.79216272
  0.94560000   2.82632525
  0.94560000   1.39697104
  0.94560000   2.36783323
  0.94560000   2.40351225
  0.94560000   2.32191130
  0.94560000   2.49074691
  0.94560000   2.12235386
  0.94560000   2.79085255
  0.94560000   1.45712743
  0.94560000   2.45490237
  0.94560000   2.21077240
  0.94560000   2.68252342
  0.94560000   1.67778489
  0.94560000   2.72890244
  0.94560000   1.58112552
  0.94560000   2.61976439
  0.94560000   1.82387460
  0.94560000   2.84552397
  0.94560000   1.36595879
  0.94560000   2.32152821
  0.94560000   2.49731019
  0.94570000   2.84503427
  0.94570000   1.36588536
  0.94570000   2.32253836
  0.94570000   2.49585834
  0.94570000   2.11193383
  0.94570000   2.80212096
  0.94570000   1.43716528
  0.94570000   2.42759579
  0.94570000   2.27334444
  0.94570000   2.58216051
  0.94570000   1.90773628
  0.94570000   2.87689532
  0.94570000   1.32000510
  0.94570000   2.25254087
  0.94570000   2.62287192
  0.94570000   1.81383426
  0.94570000   2.84097674
  0.94570000   1.37320621
  0.94570000   2.33353544
  0.94570000   2.47415225
  0.94570000   2.16241923
  0.94570000   2.74768597
  0.94570000   1.54025059
  0.94580000   1.40604843
  0.94580000   2.38348296
  0.94580000   2.37114937
  0.94580000   2.39244413
  0.94580000   2.34597335
  0.94580000   2.44349968
  0.94580000   2.23186430
  0.94580000   2.65093631
  0.94580000   1.74827793
  0.94580000   2.79612004
  0.94580000   1.44963610
  0.94580000   2.44659378
  0.94580000   2.23064247
  0.94580000   2.65387153
  0.94580000   1.74205253
  0.94580000   2.79104334
  0.94580000   1.45900294
  0.94580000   2.45989103
  0.94580000   2.20012542
  0.94580000   2.69938724
  0.94580000   1.64131659
  0.94580000   2.69261102
  0.94580000   1.65901065
  0.94580000   2.71189365
  0.94590000   2.84366441
  0.94590000   1.36843486
  0.94590000   2.32859878
  0.94590000   2.48499165
  0.94590000   2.13787146
  0.94590000   2.77764662
  0.94590000   1.48224746
  0.94590000   2.49359264
  0.94590000   2.12185360
  0.94590000   2.79471704
  0.94590000   1.45083204
  0.94590000   2.44946181
  0.94590000   2.22436376
  0.94590000   2.66430825
  0.94590000   1.71870509
  0.94590000   2.77198660
  0.94590000   1.49505241
  0.94590000   2.51123076
  0.94590000   2.08045265
  0.94590000   2.83103823
  0.94590000   1.38841197
  0.94590000   2.35849924
  0.94590000   2.42417554
  0.94600000   2.82142048
  0.94600000   1.40454777
  0.94600000   2.38354015
  0.94600000   2.37176276
  0.94600000   2.39198638
  0.94600000   2.34776698
  0.94600000   2.44079614
  0.94600000   2.23868930
  0.94600000   2.64142161
  0.94600000   1.77021462
  0.94600000   2.81561028
  0.94600000   1.41545502
  0.94600000   2.39953071
  0.94600000   2.33692405
  0.94600000   2.46376630
  0.94600000   2.18637633
  0.94600000   2.71904005
  0.94600000   1.59934249
  0.94600000   2.64667116
  0.94600000   1.76216266
  0.94600000   2.80972768
  0.94600000   1.42589186
  0.94600000   2.41474747
  0.94600000   2.30333669
  0.94610000   2.24629341
  0.94610000   2.63601580
  0.94610000   1.78437937
  0.94610000   2.82716033
  0.94610000   1.39643242
  0.94610000   2.37267668
  0.94610000   2.39553884
  0.94610000   2.34137144
  0.94610000   2.45462052
  0.94610000   2.20758527
  0.94610000   2.68996516
  0.94610000   1.66181036
  0.94610000   2.71846293
  0.94610000   1.60366052
  0.94610000   2.65311012
  0.94610000   1.74789938
  0.94610000   2.79971035
  0.94610000   1.44390974
  0.94610000   2.44189739
  0.94610000   2.24250965
  0.94610000   2.63700920
  0.94610000   1.78093310
  0.94610000   2.82462085
  0.94620000   2.24762058
  0.94620000   2.63446604
  0.94620000   1.78807714
  0.94620000   2.83090613
  0.94620000   1.39043044
  0.94620000   2.36488970
  0.94620000   2.41244695
  0.94620000   2.30455957
  0.94620000   2.52738885
  0.94620000   2.03782990
  0.94620000   2.86066924
  0.94620000   1.34323033
  0.94620000   2.29365018
  0.94620000   2.55350524
  0.94620000   1.97724651
  0.94620000   2.88232506
  0.94620000   1.31368150
  0.94620000   2.24815376
  0.94620000   2.63342094
  0.94620000   1.79031836
  0.94620000   2.83236426
  0.94620000   1.38794466
  0.94620000   2.36117459
  0.94630000   2.70361711
  0.94630000   1.63615279
  0.94630000   2.69313381
  0.94630000   1.65895585
  0.94630000   2.71805968
  0.94630000   1.60523653
  0.94630000   2.65747675
  0.94630000   1.73848247
  0.94630000   2.79440675
  0.94630000   1.45393080
  0.94630000   2.45853582
  0.94630000   2.20506106
  0.94630000   2.69613414
  0.94630000   1.64912101
  0.94630000   2.70735364
  0.94630000   1.62777987
  0.94630000   2.68364274
  0.94630000   1.67969071
  0.94630000   2.73959749
  0.94630000   1.56024436
  0.94630000   2.60216561
  0.94630000   1.86630814
  0.94630000   2.87316228
  0.94640000   1.83880207
  0.94640000   2.86269267
  0.94640000   1.34172376
  0.94640000   2.29354936
  0.94640000   2.55508626
  0.94640000   1.97411735
  0.94640000   2.88513326
  0.94640000   1.31057173
  0.94640000   2.24548620
  0.94640000   2.63922025
  0.94640000   1.77740049
  0.94640000   2.82590963
  0.94640000   1.39897024
  0.94640000   2.37982207
  0.94640000   2.38154513
  0.94640000   2.37287889
  0.94640000   2.39053042
  0.94640000   2.35226339
  0.94640000   2.43330294
  0.94640000   2.25697505
  0.94640000   2.61368262
  0.94640000   1.83471723
  0.94640000   2.86044468
  0.94650000   2.48009427
  0.94650000   2.15111032
  0.94650000   2.76780617
  0.94650000   1.50184378
  0.94650000   2.52760062
  0.94650000   2.04312843
  0.94650000   2.86141886
  0.94650000   1.34299348
  0.94650000   2.29658861
  0.94650000   2.54988338
  0.94650000   1.98655454
  0.94650000   2.88360052
  0.94650000   1.31269357
  0.94650000   2.24985577
  0.94650000   2.63259668
  0.94650000   1.79271381
  0.94650000   2.83762635
  0.94650000   1.38002079
  0.94650000   2.35269795
  0.94650000   2.43920422
  0.94650000   2.24537844
  0.94650000   2.63428362
  0.94650000   1.78755096
  0.94660000   2.87441658
  0.94660000   1.32567582
  0.94660000   2.27105472
  0.94660000   2.59701608
  0.94660000   1.87570925
  0.94660000   2.87975250
  0.94660000   1.31843045
  0.94660000   2.25984057
  0.94660000   2.61647362
  0.94660000   1.83024691
  0.94660000   2.86086007
  0.94660000   1.34477598
  0.94660000   2.30041198
  0.94660000   2.54335762
  0.94660000   2.00226758
  0.94660000   2.88019646
  0.94660000   1.31731444
  0.94660000   2.25810666
  0.94660000   2.61931832
  0.94660000   1.82354567
  0.94660000   2.85731203
  0.94660000   1.34993084
  0.94660000   2.30828286
  0.94670000   2.65252795
  0.94670000   1.74763603
  0.94670000   2.80687312
  0.94670000   1.43214829
  0.94670000   2.43188879
  0.94670000   2.26755070
  0.94670000   2.59867271
  0.94670000   1.87096824
  0.94670000   2.87924999
  0.94670000   1.31921416
  0.94670000   2.26213169
  0.94670000   2.61310285
  0.94670000   1.83820000
  0.94670000   2.86598462
  0.94670000   1.33758669
  0.94670000   2.29048421
  0.94670000   2.56243814
  0.94670000   1.95729050
  0.94670000   2.89057370
  0.94670000   1.30439608
  0.94670000   2.23908632
  0.94670000   2.65162971
  0.94670000   1.74950355
  0.94680000   2.27818106
  0.94680000   2.58549411
  0.94680000   1.90313176
  0.94680000   2.88897580
  0.94680000   1.30688921
  0.94680000   2.24405604
  0.94680000   2.64429471
  0.94680000   1.76645557
  0.94680000   2.82281928
  0.94680000   1.40485019
  0.94680000   2.39306502
  0.94680000   2.35456708
  0.94680000   2.43177398
  0.94680000   2.26245596
  0.94680000   2.60710613
  0.94680000   1.85093062
  0.94680000   2.87272920
  0.94680000   1.32817009
  0.94680000   2.27706351
  0.94680000   2.58735702
  0.94680000   1.89858291
  0.94680000   2.88801260
  0.94680000   1.30802395
  0.94690000   2.45208675
  0.94690000   2.22202254
  0.94690000   2.67514706
  0.94690000   1.69610019
  0.94690000   2.76321235
  0.94690000   1.51362122
  0.94690000   2.54833900
  0.94690000   1.99498353
  0.94690000   2.88596960
  0.94690000   1.31068696
  0.94690000   2.25105140
  0.94690000   2.63328709
  0.94690000   1.79181438
  0.94690000   2.84193995
  0.94690000   1.37397390
  0.94690000   2.34808916
  0.94690000   2.45069798
  0.94690000   2.22047071
  0.94690000   2.67676001
  0.94690000   1.69214534
  0.94690000   2.75930332
  0.94690000   1.52114488
  0.94690000   2.55840835
  0.94700000   2.24291112
  0.94700000   2.64758364
  0.94700000   1.75932573
  0.94700000   2.81986285
  0.94700000   1.41021933
  0.94700000   2.40327440
  0.94700000   2.33295010
  0.94700000   2.47701876
  0.94700000   2.15883643
  0.94700000   2.76243769
  0.94700000   1.51276879
  0.94700000   2.54834279
  0.94700000   1.99489377
  0.94700000   2.88696330
  0.94700000   1.30958078
  0.94700000   2.25039956
  0.94700000   2.63497195
  0.94700000   1.78803612
  0.94700000   2.84062806
  0.94700000   1.37618996
  0.94700000   2.35254440
  0.94700000   2.44192632
  0.94700000   2.24090622
  0.94710000   2.61083750
  0.94710000   1.84280298
  0.94710000   2.87278402
  0.94710000   1.32883173
  0.94710000   2.28136348
  0.94710000   2.58149552
  0.94710000   1.91305949
  0.94710000   2.89399836
  0.94710000   1.30131940
  0.94710000   2.23857072
  0.94710000   2.65522520
  0.94710000   1.74199421
  0.94710000   2.80713844
  0.94710000   1.43224558
  0.94710000   2.43663237
  0.94710000   2.25808226
  0.94710000   2.61754751
  0.94710000   1.82751807
  0.94710000   2.86535855
  0.94710000   1.33921586
  0.94710000   2.29736684
  0.94710000   2.55185355
  0.94710000   1.98316763
  0.94720000   1.67380988
  0.94720000   2.74475014
  0.94720000   1.55106637
  0.94720000   2.60133634
  0.94720000   1.87000137
  0.94720000   2.88516516
  0.94720000   1.31288092
  0.94720000   2.25770711
  0.94720000   2.62402030
  0.94720000   1.81376155
  0.94720000   2.85917732
  0.94720000   1.34849451
  0.94720000   2.31271385
  0.94720000   2.52316694
  0.94720000   2.05155531
  0.94720000   2.86311366
  0.94720000   1.34183883
  0.94720000   2.30250483
  0.94720000   2.54265215
  0.94720000   2.00521934
  0.94720000   2.88547497
  0.94720000   1.31180183
  0.94720000   2.25601664
  0.94730000   1.68022525
  0.94730000   2.75254159
  0.94730000   1.53551600
  0.94730000   2.58229698
  0.94730000   1.91518898
  0.94730000   2.89683681
  0.94730000   1.29853640
  0.94730000   2.23635980
  0.94730000   2.66024561
  0.94730000   1.73100499
  0.94730000   2.80029749
  0.94730000   1.44473538
  0.94730000   2.45700037
  0.94730000   2.21185566
  0.94730000   2.69338927
  0.94730000   1.65641957
  0.94730000   2.72759409
  0.94730000   1.58622478
  0.94730000   2.64675383
  0.94730000   1.76432337
  0.94730000   2.82743431
  0.94730000   1.39809535
  0.94730000   2.38872489
  0.94740000   2.53532252
  0.94740000   2.02701764
  0.94740000   2.87889202
  0.94740000   1.32089640
  0.94740000   2.27234646
  0.94740000   2.59959179
  0.94740000   1.87106122
  0.94740000   2.88769116
  0.94740000   1.31001065
  0.94740000   2.25538608
  0.94740000   2.62921889
  0.94740000   1.80200648
  0.94740000   2.85457793
  0.94740000   1.35565916
  0.94740000   2.32587722
  0.94740000   2.49829771
  0.94740000   2.11090847
  0.94740000   2.81829000
  0.94740000   1.41180335
  0.94740000   2.41016001
  0.94740000   2.31890116
  0.94740000   2.50688114
  0.94740000   2.08954699
  0.94750000   2.36597006
  0.94750000   2.41622441
  0.94750000   2.30120418
  0.94750000   2.54115008
  0.94750000   2.00836306
  0.94750000   2.88729746
  0.94750000   1.31012362
  0.94750000   2.25664021
  0.94750000   2.62759507
  0.94750000   1.80584792
  0.94750000   2.85813539
  0.94750000   1.35059945
  0.94750000   2.31924900
  0.94750000   2.51196305
  0.94750000   2.07884681
  0.94750000   2.84701759
  0.94750000   1.36601253
  0.94750000   2.34274756
  0.94750000   2.46447198
  0.94750000   2.19044010
  0.94750000   2.72518559
  0.94750000   1.58859382
  0.94750000   2.65203347
  0.94760000   2.71046692
  0.94760000   1.62319931
  0.94760000   2.69444950
  0.94760000   1.65789152
  0.94760000   2.73300404
  0.94760000   1.57570968
  0.94760000   2.63745182
  0.94760000   1.78635756
  0.94760000   2.84699685
  0.94760000   1.36763200
  0.94760000   2.34633257
  0.94760000   2.45782584
  0.94760000   2.20637247
  0.94760000   2.70311470
  0.94760000   1.63554553
  0.94760000   2.70836788
  0.94760000   1.62732459
  0.94760000   2.69913186
  0.94760000   1.64749862
  0.94760000   2.72171740
  0.94760000   1.59916512
  0.94760000   2.66614838
  0.94760000   1.72069578
  0.94770000   2.09365168
  0.94770000   2.83731685
  0.94770000   1.38162324
  0.94770000   2.36860982
  0.94770000   2.41136370
  0.94770000   2.31279592
  0.94770000   2.51984613
  0.94770000   2.05943231
  0.94770000   2.86269506
  0.94770000   1.34330685
  0.94770000   2.31026333
  0.94770000   2.53046179
  0.94770000   2.03532658
  0.94770000   2.87735184
  0.94770000   1.32338446
  0.94770000   2.27946508
  0.94770000   2.58846388
  0.94770000   1.89768431
  0.94770000   2.89831121
  0.94770000   1.29766154
  0.94770000   2.23926161
  0.94770000   2.65810359
  0.94770000   1.73631168
  0.94780000   2.89178479
  0.94780000   1.30604951
  0.94780000   2.25351395
  0.94780000   2.63510175
  0.94780000   1.78915507
  0.94780000   2.85123149
  0.94780000   1.36152225
  0.94780000   2.33927366
  0.94780000   2.47333106
  0.94780000   2.17085120
  0.94780000   2.75401119
  0.94780000   1.53051951
  0.94780000   2.58167127
  0.94780000   1.91730035
  0.94780000   2.90273266
  0.94780000   1.29282173
  0.94780000   2.23271875
  0.94780000   2.66944494
  0.94780000   1.71097034
  0.94780000   2.78851463
  0.94780000   1.46686980
  0.94780000   2.49441665
  0.94780000   2.12546969
  0.94790000   2.86809120
  0.94790000   1.33733814
  0.94790000   2.30327936
  0.94790000   2.54534183
  0.94790000   2.00059363
  0.94790000   2.89453666
  0.94790000   1.30237742
  0.94790000   2.24882878
  0.94790000   2.64356775
  0.94790000   1.76976259
  0.94790000   2.83882253
  0.94790000   1.38078166
  0.94790000   2.36958488
  0.94790000   2.41021819
  0.94790000   2.31612093
  0.94790000   2.51437493
  0.94790000   2.07288987
  0.94790000   2.85505891
  0.94790000   1.35464920
  0.94790000   2.32987413
  0.94790000   2.49263266
  0.94790000   2.12551373
  0.94790000   2.80796729
  0.94800000   2.28816392
  0.94800000   2.56827336
  0.94800000   1.94480624
  0.94800000   2.90560974
  0.94800000   1.28981941
  0.94800000   2.23011831
  0.94800000   2.67492706
  0.94800000   1.69898896
  0.94800000   2.77969044
  0.94800000   1.48362705
  0.94800000   2.52031304
  0.94800000   2.06441418
  0.94800000   2.86289705
  0.94800000   1.34390536
  0.94800000   2.31450233
  0.94800000   2.52391444
  0.94800000   2.05168698
  0.94800000   2.87090437
  0.94800000   1.33265883
  0.94800000   2.29712998
  0.94800000   2.55738703
  0.94800000   1.97194471
  0.94800000   2.90289684
  0.94810000   1.57926230
  0.94810000   2.64791019
  0.94810000   1.76275517
  0.94810000   2.83611497
  0.94810000   1.38552151
  0.94810000   2.37898499
  0.94810000   2.39086736
  0.94810000   2.35993291
  0.94810000   2.42584048
  0.94810000   2.28040359
  0.94810000   2.58302919
  0.94810000   1.90988833
  0.94810000   2.90483911
  0.94810000   1.29100876
  0.94810000   2.23305860
  0.94810000   2.67084181
  0.94810000   1.70819399
  0.94810000   2.78964440
  0.94810000   1.46522040
  0.94810000   2.49560458
  0.94810000   2.12347061
  0.94810000   2.81241505
  0.94810000   1.42304948
  0.94820000   2.75527893
  0.94820000   1.52852162
  0.94820000   2.58384668
  0.94820000   1.91295050
  0.94820000   2.90685161
  0.94820000   1.28929656
  0.94820000   2.23143477
  0.94820000   2.67430921
  0.94820000   1.70073045
  0.94820000   2.78386094
  0.94820000   1.47615499
  0.94820000   2.51222817
  0.94820000   2.08424974
  0.94820000   2.84978605
  0.94820000   1.36335384
  0.94820000   2.34652813
  0.94820000   2.46018583
  0.94820000   2.20271808
  0.94820000   2.71285621
  0.94820000   1.61548811
  0.94820000   2.69279125
  0.94820000   1.66195053
  0.94820000   2.74471511
  0.94830000   1.28668523
  0.94830000   2.22837730
  0.94830000   2.67993741
  0.94830000   1.68841407
  0.94830000   2.77312762
  0.94830000   1.49660860
  0.94830000   2.54187999
  0.94830000   2.01365232
  0.94830000   2.89417611
  0.94830000   1.30387821
  0.94830000   2.25549758
  0.94830000   2.63481745
  0.94830000   1.79051126
  0.94830000   2.85824515
  0.94830000   1.35214249
  0.94830000   2.33048588
  0.94830000   2.49372008
  0.94830000   2.12423934
  0.94830000   2.81288402
  0.94830000   1.42242479
  0.94830000   2.43612800
  0.94830000   2.26327147
  0.94830000   2.61604859
  0.94840000   1.52127450
  0.94840000   2.57663991
  0.94840000   1.93088860
  0.94840000   2.91069285
  0.94840000   1.28568888
  0.94840000   2.22786636
  0.94840000   2.68147314
  0.94840000   1.68516430
  0.94840000   2.77113682
  0.94840000   1.50056439
  0.94840000   2.54851105
  0.94840000   1.99799450
  0.94840000   2.90100979
  0.94840000   1.29617265
  0.94840000   2.24443868
  0.94840000   2.65426698
  0.94840000   1.74610878
  0.94840000   2.82662857
  0.94840000   1.40132939
  0.94840000   2.40606634
  0.94840000   2.33224365
  0.94840000   2.48555222
  0.94840000   2.14285870
  0.94850000   1.68257838
  0.94850000   2.76979897
  0.94850000   1.50332635
  0.94850000   2.55349967
  0.94850000   1.98632490
  0.94850000   2.90554534
  0.94850000   1.29138851
  0.94850000   2.23795736
  0.94850000   2.66574562
  0.94850000   1.72034765
  0.94850000   2.80578923
  0.94850000   1.43695102
  0.94850000   2.45969026
  0.94850000   2.20949864
  0.94850000   2.70563807
  0.94850000   1.63158272
  0.94850000   2.71505269
  0.94850000   1.61433910
  0.94850000   2.69523099
  0.94850000   1.65729987
  0.94850000   2.74351147
  0.94850000   1.55531679
  0.94850000   2.62257680
  0.94860000   1.93812122
  0.94860000   2.91277888
  0.94860000   1.28387609
  0.94860000   2.22712061
  0.94860000   2.68398802
  0.94860000   1.67984511
  0.94860000   2.76826304
  0.94860000   1.50637502
  0.94860000   2.55885502
  0.94860000   1.97366267
  0.94860000   2.90949398
  0.94860000   1.28734890
  0.94860000   2.23262743
  0.94860000   2.67510428
  0.94860000   1.69950665
  0.94860000   2.78766098
  0.94860000   1.46971095
  0.94860000   2.50786470
  0.94860000   2.09569714
  0.94860000   2.84372960
  0.94860000   1.37324433
  0.94860000   2.36606317
  0.94860000   2.42080287
  0.94870000   2.07785882
  0.94870000   2.85972787
  0.94870000   1.34993514
  0.94870000   2.33155118
  0.94870000   2.49361732
  0.94870000   2.12565642
  0.94870000   2.81492783
  0.94870000   1.41966983
  0.94870000   2.43669755
  0.94870000   2.26344563
  0.94870000   2.61832577
  0.94870000   1.82839627
  0.94870000   2.88519334
  0.94870000   1.31626679
  0.94870000   2.27925292
  0.94870000   2.59496235
  0.94870000   1.88425736
  0.94870000   2.90692342
  0.94870000   1.29055009
  0.94870000   2.23876062
  0.94870000   2.66569050
  0.94870000   1.72067753
  0.94870000   2.80855083
  0.94880000   2.90493992
  0.94880000   1.29283815
  0.94880000   2.24347065
  0.94880000   2.65861728
  0.94880000   1.73690810
  0.94880000   2.82397164
  0.94880000   1.40648988
  0.94880000   2.41833821
  0.94880000   2.30613717
  0.94880000   2.53968457
  0.94880000   2.01511228
  0.94880000   2.89820767
  0.94880000   1.30017401
  0.94880000   2.25504982
  0.94880000   2.63870459
  0.94880000   1.78225862
  0.94880000   2.85881104
  0.94880000   1.35235470
  0.94880000   2.33636850
  0.94880000   2.48424387
  0.94880000   2.14807150
  0.94880000   2.79044705
  0.94880000   1.46269345
  0.94890000   1.67202158
  0.94890000   2.76400807
  0.94890000   1.51515438
  0.94890000   2.57440216
  0.94890000   1.93718871
  0.94890000   2.91644962
  0.94890000   1.28104171
  0.94890000   2.22581581
  0.94890000   2.68819992
  0.94890000   1.67102012
  0.94890000   2.76294776
  0.94890000   1.51714700
  0.94890000   2.57708342
  0.94890000   1.93070764
  0.94890000   2.91632527
  0.94890000   1.28114780
  0.94890000   2.22597953
  0.94890000   2.68788791
  0.94890000   1.67165270
  0.94890000   2.76359093
  0.94890000   1.51584779
  0.94890000   2.57532061
  0.94890000   1.93486957
  0.94900000   1.38839804
  0.94900000   2.39351599
  0.94900000   2.36257342
  0.94900000   2.42519176
  0.94900000   2.28548461
  0.94900000   2.57912480
  0.94900000   1.92100218
  0.94900000   2.91644925
  0.94900000   1.28108637
  0.94900000   2.22693914
  0.94900000   2.68693117
  0.94900000   1.67381541
  0.94900000   2.76705939
  0.94900000   1.50922709
  0.94900000   2.56753331
  0.94900000   1.95367854
  0.94900000   2.91673395
  0.94900000   1.28093074
  0.94900000   2.22669744
  0.94900000   2.68739559
  0.94900000   1.67283870
  0.94900000   2.76605607
  0.94900000   1.51117679
  0.94910000   2.53876812
  0.94910000   2.01908656
  0.94910000   2.89981160
  0.94910000   1.29924666
  0.94910000   2.25683147
  0.94910000   2.63765261
  0.94910000   1.78525991
  0.94910000   2.86458892
  0.94910000   1.34484507
  0.94910000   2.32812798
  0.94910000   2.50267888
  0.94910000   2.10520632
  0.94910000   2.83908469
  0.94910000   1.38119160
  0.94910000   2.38375889
  0.94910000   2.38454528
  0.94910000   2.37794216
  0.94910000   2.39156727
  0.94910000   2.36130552
  0.94910000   2.42707419
  0.94910000   2.28097365
  0.94910000   2.58780727
  0.94910000   1.90035762
  0.94920000   2.27550079
  0.94920000   2.60503996
  0.94920000   1.86156218
  0.94920000   2.90585070
  0.94920000   1.29323770
  0.94920000   2.24839351
  0.94920000   2.65293254
  0.94920000   1.75041043
  0.94920000   2.84005212
  0.94920000   1.38139432
  0.94920000   2.38520574
  0.94920000   2.38200907
  0.94920000   2.38407103
  0.94920000   2.37866041
  0.94920000   2.39021423
  0.94920000   2.36463906
  0.94920000   2.42036329
  0.94920000   2.29667940
  0.94920000   2.55878898
  0.94920000   1.96965998
  0.94920000   2.91613552
  0.94920000   1.28176471
  0.94920000   2.23014505
  0.94930000   2.92094510
  0.94930000   1.27778056
  0.94930000   2.22488331
  0.94930000   2.69252903
  0.94930000   1.66214519
  0.94930000   2.75862969
  0.94930000   1.52624360
  0.94930000   2.59414445
  0.94930000   1.89088173
  0.94930000   2.91584196
  0.94930000   1.28292957
  0.94930000   2.23308535
  0.94930000   2.67920505
  0.94930000   1.69142550
  0.94930000   2.78854827
  0.94930000   1.46920416
  0.94930000   2.51542246
  0.94930000   2.07946845
  0.94930000   2.86404446
  0.94930000   1.34503686
  0.94930000   2.33064497
  0.94930000   2.49844194
  0.94930000   2.11575032
  0.94940000   2.15822807
  0.94940000   2.78268704
  0.94940000   1.47773882
  0.94940000   2.52864501
  0.94940000   2.04769042
  0.94940000   2.88765922
  0.94940000   1.31436273
  0.94940000   2.28390452
  0.94940000   2.59053608
  0.94940000   1.89605780
  0.94940000   2.91786620
  0.94940000   1.28103405
  0.94940000   2.23112722
  0.94940000   2.68301216
  0.94940000   1.68307566
  0.94940000   2.78148409
  0.94940000   1.48241529
  0.94940000   2.53524459
  0.94940000   2.03207591
  0.94940000   2.89675265
  0.94940000   1.30356381
  0.94940000   2.26688794
  0.94940000   2.62168703
  0.94950000   1.38995316
  0.94950000   2.40156507
  0.94950000   2.34690137
  0.94950000   2.46091773
  0.94950000   2.20441784
  0.94950000   2.71974831
  0.94950000   1.60268853
  0.94950000   2.69371036
  0.94950000   1.66183835
  0.94950000   2.76079200
  0.94950000   1.52224163
  0.94950000   2.59118238
  0.94950000   1.89823304
  0.94950000   2.91967640
  0.94950000   1.27962401
  0.94950000   2.22994618
  0.94950000   2.68565631
  0.94950000   1.67740099
  0.94950000   2.77698390
  0.94950000   1.49103065
  0.94950000   2.54847053
  0.94950000   2.00050833
  0.94950000   2.91180021
  0.94960000   2.22500941
  0.94960000   2.69444876
  0.94960000   1.65839966
  0.94960000   2.75838309
  0.94960000   1.52719069
  0.94960000   2.59904636
  0.94960000   1.87981839
  0.94960000   2.91661688
  0.94960000   1.28305934
  0.94960000   2.23650018
  0.94960000   2.67563616
  0.94960000   1.69981028
  0.94960000   2.80043556
  0.94960000   1.44823541
  0.94960000   2.48890676
  0.94960000   2.14376310
  0.94960000   2.80284744
  0.94960000   1.44208496
  0.94960000   2.47997329
  0.94960000   2.16483768
  0.94960000   2.77668329
  0.94960000   1.48949393
  0.94960000   2.54750011
  0.94970000   2.80321403
  0.94970000   1.44354217
  0.94970000   2.48328345
  0.94970000   2.15753489
  0.94970000   2.78695907
  0.94970000   1.47072529
  0.94970000   2.52231008
  0.94970000   2.06379843
  0.94970000   2.87982676
  0.94970000   1.32489697
  0.94970000   2.30371545
  0.94970000   2.55443548
  0.94970000   1.98276081
  0.94970000   2.91906412
  0.94970000   1.28048540
  0.94970000   2.23345660
  0.94970000   2.68120476
  0.94970000   1.68747264
  0.94970000   2.78962042
  0.94970000   1.46783204
  0.94970000   2.51820130
  0.94970000   2.07378078
  0.94970000   2.87233804
  0.94980000   2.02703067
  0.94980000   2.90319177
  0.94980000   1.29731254
  0.94980000   2.26132743
  0.94980000   2.63420404
  0.94980000   1.79435801
  0.94980000   2.87921058
  0.94980000   1.32677192
  0.94980000   2.30774693
  0.94980000   2.54720273
  0.94980000   2.00038632
  0.94980000   2.91471615
  0.94980000   1.28509867
  0.94980000   2.24189141
  0.94980000   2.66782670
  0.94980000   1.71749444
  0.94980000   2.81940271
  0.94980000   1.41582901
  0.94980000   2.44372460
  0.94980000   2.25113362
  0.94980000   2.64698914
  0.94980000   1.76385090
  0.94980000   2.85782608
  0.94990000   1.28088363
  0.94990000   2.23623673
  0.94990000   2.67810709
  0.94990000   1.69475738
  0.94990000   2.79931175
  0.94990000   1.45075826
  0.94990000   2.49608393
  0.94990000   2.12749148
  0.94990000   2.82392190
  0.94990000   1.40697489
  0.94990000   2.43169473
  0.94990000   2.27935478
  0.94990000   2.59690189
  0.94990000   1.88092285
  0.94990000   2.92009125
  0.94990000   1.28027998
  0.94990000   2.23525945
  0.94990000   2.67958332
  0.94990000   1.69134370
  0.94990000   2.79594180
  0.94990000   1.45669063
  0.94990000   2.50462403
  0.94990000   2.10691367
  0.95000000   1.65442676
  0.95000000   2.75909252
  0.95000000   1.52637116
  0.95000000   2.60279593
  0.95000000   1.87165007
  0.95000000   2.91897010
  0.95000000   1.28192515
  0.95000000   2.23896969
  0.95000000   2.67422185
  0.95000000   1.70355080
  0.95000000   2.80900082
  0.95000000   1.43391673
  0.95000000   2.47273657
  0.95000000   2.18346554
  0.95000000   2.75480542
  0.95000000   1.53224827
  0.95000000   2.61059758
  0.95000000   1.85287731
  0.95000000   2.91224804
  0.95000000   1.28868282
  0.95000000   2.24974718
  0.95000000   2.65578382
  0.95000000   1.74505679
  0.95010000   1.29571572
  0.95010000   2.26203413
  0.95010000   2.63500186
  0.95010000   1.79309943
  0.95010000   2.88212537
  0.95010000   1.32381862
  0.95010000   2.30642214
  0.95010000   2.55151043
  0.95010000   1.99075708
  0.95010000   2.92115044
  0.95010000   1.27967603
  0.95010000   2.23644135
  0.95010000   2.67901401
  0.95010000   1.69294314
  0.95010000   2.80002323
  0.95010000   1.44977307
  0.95010000   2.49700333
  0.95010000   2.12578442
  0.95010000   2.82747941
  0.95010000   1.40153001
  0.95010000   2.42583594
  0.95010000   2.29358445
  0.95010000   2.57116973
  0.95020000   2.79102938
  0.95020000   1.46621269
  0.95020000   2.52183778
  0.95020000   2.06644616
  0.95020000   2.88283412
  0.95020000   1.32236376
  0.95020000   2.30524260
  0.95020000   2.55429566
  0.95020000   1.98424544
  0.95020000   2.92410758
  0.95020000   1.27719078
  0.95020000   2.23352863
  0.95020000   2.68452896
  0.95020000   1.68086563
  0.95020000   2.78925396
  0.95020000   1.46933307
  0.95020000   2.52626955
  0.95020000   2.05563870
  0.95020000   2.89046389
  0.95020000   1.31299085
  0.95020000   2.29047550
  0.95020000   2.58282197
  0.95020000   1.91590407
  0.95030000   1.79637881
  0.95030000   2.88666930
  0.95030000   1.31863391
  0.95030000   2.30046851
  0.95030000   2.56429241
  0.95030000   1.96053596
  0.95030000   2.93015973
  0.95030000   1.27208268
  0.95030000   2.22639842
  0.95030000   2.69693518
  0.95030000   1.65384746
  0.95030000   2.76219379
  0.95030000   1.52067965
  0.95030000   2.59876177
  0.95030000   1.88171407
  0.95030000   2.92538512
  0.95030000   1.27666402
  0.95030000   2.23374896
  0.95030000   2.68490498
  0.95030000   1.68020206
  0.95030000   2.78983366
  0.95030000   1.46843324
  0.95030000   2.52617309
  0.95040000   1.38284208
  0.95040000   2.40104612
  0.95040000   2.35171409
  0.95040000   2.45511713
  0.95040000   2.22099824
  0.95040000   2.70047629
  0.95040000   1.64504525
  0.95040000   2.75373011
  0.95040000   1.53729300
  0.95040000   2.62218553
  0.95040000   1.82643065
  0.95040000   2.90513788
  0.95040000   1.29746466
  0.95040000   2.26804821
  0.95040000   2.62592153
  0.95040000   1.81457863
  0.95040000   2.89868328
  0.95040000   1.30458661
  0.95040000   2.27935611
  0.95040000   2.60506295
  0.95040000   1.86353022
  0.95040000   2.92085386
  0.95040000   1.28118523
  0.95050000   1.33218598
  0.95050000   2.32395629
  0.95050000   2.51858266
  0.95050000   2.07090741
  0.95050000   2.88189737
  0.95050000   1.32412852
  0.95050000   2.31131314
  0.95050000   2.54387504
  0.95050000   2.00991972
  0.95050000   2.91836487
  0.95050000   1.28351758
  0.95050000   2.24687482
  0.95050000   2.66396358
  0.95050000   1.72724422
  0.95050000   2.83683087
  0.95050000   1.38894705
  0.95050000   2.41144192
  0.95050000   2.32833130
  0.95050000   2.50438113
  0.95050000   2.10391632
  0.95050000   2.85275926
  0.95050000   1.36332394
  0.95050000   2.37228376
  0.95060000   1.27268899
  0.95060000   2.23057528
  0.95060000   2.69228847
  0.95060000   1.66449972
  0.95060000   2.77735982
  0.95060000   1.49212239
  0.95060000   2.56317688
  0.95060000   1.96762062
  0.95060000   2.93261435
  0.95060000   1.27100099
  0.95060000   2.22785553
  0.95060000   2.69667957
  0.95060000   1.65485061
  0.95060000   2.76703234
  0.95060000   1.51175375
  0.95060000   2.59026871
  0.95060000   1.90253275
  0.95060000   2.93328305
  0.95060000   1.27055480
  0.95060000   2.22713148
  0.95060000   2.69784451
  0.95060000   1.65228940
  0.95060000   2.76424731
  0.95070000   1.54198926
  0.95070000   2.63208793
  0.95070000   1.80393726
  0.95070000   2.89639192
  0.95070000   1.30820146
  0.95070000   2.28836661
  0.95070000   2.58997466
  0.95070000   1.89998940
  0.95070000   2.93384685
  0.95070000   1.27035790
  0.95070000   2.22788182
  0.95070000   2.69732102
  0.95070000   1.65359108
  0.95070000   2.76691855
  0.95070000   1.51212360
  0.95070000   2.59198280
  0.95070000   1.89862711
  0.95070000   2.93380133
  0.95070000   1.27045304
  0.95070000   2.22803241
  0.95070000   2.69706502
  0.95070000   1.65412511
  0.95070000   2.76748986
  0.95080000   2.46585267
  0.95080000   2.20243925
  0.95080000   2.73325812
  0.95080000   1.57684787
  0.95080000   2.67811107
  0.95080000   1.69844887
  0.95080000   2.81419286
  0.95080000   1.42652087
  0.95080000   2.47118758
  0.95080000   2.18964664
  0.95080000   2.75214749
  0.95080000   1.53867998
  0.95080000   2.62887999
  0.95080000   1.81127145
  0.95080000   2.90183699
  0.95080000   1.30221843
  0.95080000   2.27994828
  0.95080000   2.60638302
  0.95080000   1.86114710
  0.95080000   2.92482338
  0.95080000   1.27870821
  0.95080000   2.24237449
  0.95080000   2.67370945
  0.95090000   2.87116162
  0.95090000   1.34005388
  0.95090000   2.34069770
  0.95090000   2.48591649
  0.95090000   2.15035237
  0.95090000   2.80524010
  0.95090000   1.43995442
  0.95090000   2.49210417
  0.95090000   2.13960832
  0.95090000   2.81865830
  0.95090000   1.41736115
  0.95090000   2.45874724
  0.95090000   2.21929991
  0.95090000   2.70751736
  0.95090000   1.63086150
  0.95090000   2.74407155
  0.95090000   1.55743151
  0.95090000   2.65464368
  0.95090000   1.75184537
  0.95090000   2.86242618
  0.95090000   1.35196374
  0.95090000   2.35922913
  0.95090000   2.44630136
  0.95100000   1.29279763
  0.95100000   2.26711436
  0.95100000   2.63148000
  0.95100000   1.80274424
  0.95100000   2.89923370
  0.95100000   1.30569321
  0.95100000   2.28765696
  0.95100000   2.59304304
  0.95100000   1.89322187
  0.95100000   2.93611319
  0.95100000   1.26947769
  0.95100000   2.22965755
  0.95100000   2.69646271
  0.95100000   1.65587508
  0.95100000   2.77314139
  0.95100000   1.50066406
  0.95100000   2.57984679
  0.95100000   1.92827309
  0.95100000   2.94023598
  0.95100000   1.26614263
  0.95100000   2.22427179
  0.95100000   2.70526739
  0.95100000   1.63680730
  0.95110000   1.65041505
  0.95110000   2.76848193
  0.95110000   1.50978502
  0.95110000   2.59363259
  0.95110000   1.89551323
  0.95110000   2.93795946
  0.95110000   1.26840404
  0.95110000   2.22899317
  0.95110000   2.69830241
  0.95110000   1.65206019
  0.95110000   2.77026771
  0.95110000   1.50632541
  0.95110000   2.58887231
  0.95110000   1.90684973
  0.95110000   2.93974788
  0.95110000   1.26692919
  0.95110000   2.22660716
  0.95110000   2.70217719
  0.95110000   1.64362595
  0.95110000   2.76098776
  0.95110000   1.52423437
  0.95110000   2.61326845
  0.95110000   1.84872104
  0.95120000   2.63183854
  0.95120000   1.80532850
  0.95120000   2.90337344
  0.95120000   1.30175134
  0.95120000   2.28356753
  0.95120000   2.60204210
  0.95120000   1.87223838
  0.95120000   2.93326174
  0.95120000   1.27257865
  0.95120000   2.23679469
  0.95120000   2.68592607
  0.95120000   1.67926762
  0.95120000   2.80017129
  0.95120000   1.45140083
  0.95120000   2.51233617
  0.95120000   2.09184570
  0.95120000   2.87126102
  0.95120000   1.33953636
  0.95120000   2.34322571
  0.95120000   2.48184661
  0.95120000   2.16080198
  0.95120000   2.79431194
  0.95120000   1.45954992
  0.95130000   2.24141574
  0.95130000   2.67882495
  0.95130000   1.69523396
  0.95130000   2.81732441
  0.95130000   1.42213699
  0.95130000   2.47052391
  0.95130000   2.19280057
  0.95130000   2.75134989
  0.95130000   1.54101678
  0.95130000   2.63808623
  0.95130000   1.79063574
  0.95130000   2.89542588
  0.95130000   1.31087648
  0.95130000   2.29916294
  0.95130000   2.57245548
  0.95130000   1.94297599
  0.95130000   2.94311607
  0.95130000   1.26485655
  0.95130000   2.22538096
  0.95130000   2.70550601
  0.95130000   1.63669501
  0.95130000   2.75573398
  0.95130000   1.53484029
  0.95140000   2.22576647
  0.95140000   2.70575430
  0.95140000   1.63646361
  0.95140000   2.75675768
  0.95140000   1.53309163
  0.95140000   2.62882884
  0.95140000   1.81268923
  0.95140000   2.91007232
  0.95140000   1.29519347
  0.95140000   2.27527255
  0.95140000   2.61882284
  0.95140000   1.83294970
  0.95140000   2.92041544
  0.95140000   1.28480507
  0.95140000   2.25861871
  0.95140000   2.64922525
  0.95140000   1.76224280
  0.95140000   2.87662622
  0.95140000   1.33402608
  0.95140000   2.33681142
  0.95140000   2.49647317
  0.95140000   2.12634764
  0.95140000   2.83765467
  0.95150000   2.70382874
  0.95150000   1.64065555
  0.95150000   2.76270023
  0.95150000   1.52156302
  0.95150000   2.61453678
  0.95150000   1.84650013
  0.95150000   2.92783966
  0.95150000   1.27838546
  0.95150000   2.24937071
  0.95150000   2.66631806
  0.95150000   1.72351645
  0.95150000   2.84609392
  0.95150000   1.37686046
  0.95150000   2.40443161
  0.95150000   2.34832027
  0.95150000   2.46755798
  0.95150000   2.19497001
  0.95150000   2.74868097
  0.95150000   1.54621079
  0.95150000   2.64734229
  0.95150000   1.76932412
  0.95150000   2.88317061
  0.95150000   1.32600502
  0.95160000   2.93498811
  0.95160000   1.27263461
  0.95160000   2.24117020
  0.95160000   2.68126815
  0.95160000   1.69025016
  0.95160000   2.81621432
  0.95160000   1.42454712
  0.95160000   2.47760637
  0.95160000   2.17674787
  0.95160000   2.77668052
  0.95160000   1.49267046
  0.95160000   2.57593511
  0.95160000   1.93871245
  0.95160000   2.94696074
  0.95160000   1.26318349
  0.95160000   2.22586227
  0.95160000   2.70684218
  0.95160000   1.63428341
  0.95160000   2.75676899
  0.95160000   1.53327274
  0.95160000   2.63149688
  0.95160000   1.80667653
  0.95160000   2.90905387
  0.95170000   2.22762709
  0.95170000   2.70475184
  0.95170000   1.63903129
  0.95170000   2.76339814
  0.95170000   1.52054772
  0.95170000   2.61559837
  0.95170000   1.84435949
  0.95170000   2.92937125
  0.95170000   1.27770937
  0.95170000   2.25042931
  0.95170000   2.66576713
  0.95170000   1.72506684
  0.95170000   2.84997276
  0.95170000   1.37154137
  0.95170000   2.39853520
  0.95170000   2.36257006
  0.95170000   2.43776289
  0.95170000   2.26611940
  0.95170000   2.63139506
  0.95170000   1.80258476
  0.95170000   2.90755308
  0.95170000   1.29842467
  0.95170000   2.28368376
  0.95180000   2.52442821
  0.95180000   2.06415755
  0.95180000   2.90006851
  0.95180000   1.30631387
  0.95180000   2.29739413
  0.95180000   2.57872552
  0.95180000   1.92895222
  0.95180000   2.94917294
  0.95180000   1.26233065
  0.95180000   2.22660674
  0.95180000   2.70700795
  0.95180000   1.63422754
  0.95180000   2.75921439
  0.95180000   1.52879190
  0.95180000   2.62794012
  0.95180000   1.81537218
  0.95180000   2.91645197
  0.95180000   1.28995481
  0.95180000   2.27121062
  0.95180000   2.62876726
  0.95180000   1.81027399
  0.95180000   2.91345637
  0.95180000   1.29282727
  0.95190000   1.63599291
  0.95190000   2.76249207
  0.95190000   1.52264504
  0.95190000   2.62088295
  0.95190000   1.83224788
  0.95190000   2.92636131
  0.95190000   1.28104668
  0.95190000   2.25796463
  0.95190000   2.65366191
  0.95190000   1.75292086
  0.95190000   2.87570891
  0.95190000   1.33648761
  0.95190000   2.34624996
  0.95190000   2.47900344
  0.95190000   2.16979205
  0.95190000   2.78800509
  0.95190000   1.47207886
  0.95190000   2.55041188
  0.95190000   2.00097414
  0.95190000   2.93704742
  0.95190000   1.27157582
  0.95190000   2.24265917
  0.95190000   2.68048805
  0.95200000   2.22760760
  0.95200000   2.70675885
  0.95200000   1.63508397
  0.95200000   2.76270051
  0.95200000   1.52233807
  0.95200000   2.62167788
  0.95200000   1.83049804
  0.95200000   2.92672723
  0.95200000   1.28103274
  0.95200000   2.25901723
  0.95200000   2.65237411
  0.95200000   1.75599984
  0.95200000   2.87935578
  0.95200000   1.33207396
  0.95200000   2.34041734
  0.95200000   2.49188935
  0.95200000   2.13909019
  0.95200000   2.82812167
  0.95200000   1.40390585
  0.95200000   2.45132589
  0.95200000   2.24046000
  0.95200000   2.67986576
  0.95200000   1.69281253
  0.95210000   2.78190894
  0.95210000   1.48607768
  0.95210000   2.57273084
  0.95210000   1.94775560
  0.95210000   2.95211464
  0.95210000   1.26152906
  0.95210000   2.22850112
  0.95210000   2.70600977
  0.95210000   1.63685499
  0.95210000   2.76595456
  0.95210000   1.51618779
  0.95210000   2.61452618
  0.95210000   1.84756623
  0.95210000   2.93554171
  0.95210000   1.27386421
  0.95210000   2.24850825
  0.95210000   2.67172737
  0.95210000   1.71221112
  0.95210000   2.84341774
  0.95210000   1.38213333
  0.95210000   2.41936812
  0.95210000   2.31619013
  0.95210000   2.53767033
  0.95220000   1.27451006
  0.95220000   2.25063205
  0.95220000   2.66866584
  0.95220000   1.71930159
  0.95220000   2.85113858
  0.95220000   1.37095664
  0.95220000   2.40332866
  0.95220000   2.35367453
  0.95220000   2.45945662
  0.95220000   2.21654157
  0.95220000   2.72034786
  0.95220000   1.60523921
  0.95220000   2.73030291
  0.95220000   1.58752076
  0.95220000   2.70877605
  0.95220000   1.63324052
  0.95220000   2.76313219
  0.95220000   1.52181889
  0.95220000   2.62340323
  0.95220000   1.82671187
  0.95220000   2.92728910
  0.95220000   1.28116637
  0.95220000   2.26138381
  0.95230000   2.83741976
  0.95230000   1.39177893
  0.95230000   2.43641850
  0.95230000   2.27711378
  0.95230000   2.61572070
  0.95230000   1.84086949
  0.95230000   2.93487129
  0.95230000   1.27497369
  0.95230000   2.25244971
  0.95230000   2.66599639
  0.95230000   1.72540344
  0.95230000   2.85779500
  0.95230000   1.36160148
  0.95230000   2.38997711
  0.95230000   2.38445352
  0.95230000   2.39197107
  0.95230000   2.37413386
  0.95230000   2.41385594
  0.95230000   2.32356858
  0.95230000   2.52227102
  0.95230000   2.06488353
  0.95230000   2.90343560
  0.95230000   1.30372409
  0.95240000   2.90235352
  0.95240000   1.30613680
  0.95240000   2.30367563
  0.95240000   2.56969752
  0.95240000   1.95189638
  0.95240000   2.95472879
  0.95240000   1.26087710
  0.95240000   2.23062896
  0.95240000   2.70443588
  0.95240000   1.64061834
  0.95240000   2.77393670
  0.95240000   1.50139002
  0.95240000   2.59777851
  0.95240000   1.88798688
  0.95240000   2.95175540
  0.95240000   1.26297173
  0.95240000   2.23403690
  0.95240000   2.69871254
  0.95240000   1.65299675
  0.95240000   2.78759015
  0.95240000   1.47600992
  0.95240000   2.56203771
  0.95240000   1.97413324
  0.95250000   2.44624836
  0.95250000   2.25458531
  0.95250000   2.65852926
  0.95250000   1.74182192
  0.95250000   2.87422241
  0.95250000   1.33983189
  0.95250000   2.35821283
  0.95250000   2.45601214
  0.95250000   2.22662871
  0.95250000   2.70617969
  0.95250000   1.63588155
  0.95250000   2.76979134
  0.95250000   1.50924364
  0.95250000   2.60984657
  0.95250000   1.85928819
  0.95250000   2.94479457
  0.95250000   1.26817041
  0.95250000   2.24355840
  0.95250000   2.68299039
  0.95250000   1.68763553
  0.95250000   2.82492154
  0.95250000   1.41183602
  0.95250000   2.46909576
  0.95260000   1.91132716
  0.95260000   2.95772396
  0.95260000   1.25996305
  0.95260000   2.23127181
  0.95260000   2.70480332
  0.95260000   1.64017853
  0.95260000   2.77596882
  0.95260000   1.49792212
  0.95260000   2.59537794
  0.95260000   1.89415379
  0.95260000   2.95535925
  0.95260000   1.26143488
  0.95260000   2.23366823
  0.95260000   2.70071985
  0.95260000   1.64895866
  0.95260000   2.78569791
  0.95260000   1.47982456
  0.95260000   2.56987438
  0.95260000   1.95558900
  0.95260000   2.95676038
  0.95260000   1.26044720
  0.95260000   2.23205627
  0.95260000   2.70339226
  0.95270000   1.26176270
  0.95270000   2.23527700
  0.95270000   2.69874858
  0.95270000   1.65346470
  0.95270000   2.79189963
  0.95270000   1.46879571
  0.95270000   2.55531945
  0.95270000   1.99118969
  0.95270000   2.94930911
  0.95270000   1.26556140
  0.95270000   2.24146348
  0.95270000   2.68797579
  0.95270000   1.67694160
  0.95270000   2.81666521
  0.95270000   1.42580135
  0.95270000   2.49235103
  0.95270000   2.14432815
  0.95270000   2.82822856
  0.95270000   1.40527841
  0.95270000   2.46152931
  0.95270000   2.21846841
  0.95270000   2.72160153
  0.95270000   1.60362578
  0.95280000   2.57163541
  0.95280000   1.94813808
  0.95280000   2.95968718
  0.95280000   1.25948582
  0.95280000   2.23262377
  0.95280000   2.70384059
  0.95280000   1.64251955
  0.95280000   2.78109543
  0.95280000   1.48866747
  0.95280000   2.58481090
  0.95280000   1.91993808
  0.95280000   2.96068109
  0.95280000   1.25900845
  0.95280000   2.23184012
  0.95280000   2.70516645
  0.95280000   1.63964260
  0.95280000   2.77787027
  0.95280000   1.49464194
  0.95280000   2.59320422
  0.95280000   1.89970149
  0.95280000   2.95862089
  0.95280000   1.26021640
  0.95280000   2.23380913
  0.95290000   2.70961144
  0.95290000   1.62918767
  0.95290000   2.76720936
  0.95290000   1.51488629
  0.95290000   2.62248566
  0.95290000   1.83009282
  0.95290000   2.93753280
  0.95290000   1.27511349
  0.95290000   2.25913539
  0.95290000   2.65786485
  0.95290000   1.74484537
  0.95290000   2.88178410
  0.95290000   1.33138191
  0.95290000   2.34935589
  0.95290000   2.47715271
  0.95290000   2.17722635
  0.95290000   2.78552418
  0.95290000   1.47822494
  0.95290000   2.57117162
  0.95290000   1.95278008
  0.95290000   2.96042233
  0.95290000   1.25944792
  0.95290000   2.23361824
  0.95300000   2.90482645
  0.95300000   1.30469569
  0.95300000   2.30796919
  0.95300000   2.56438282
  0.95300000   1.96601048
  0.95300000   2.95914337
  0.95300000   1.26054942
  0.95300000   2.23649169
  0.95300000   2.69855389
  0.95300000   1.65422444
  0.95300000   2.79648284
  0.95300000   1.46106577
  0.95300000   2.54774428
  0.95300000   2.01023382
  0.95300000   2.94486192
  0.95300000   1.26968281
  0.95300000   2.25138511
  0.95300000   2.67240402
  0.95300000   1.71200594
  0.95300000   2.85455622
  0.95300000   1.36777623
  0.95300000   2.40751650
  0.95300000   2.34711969
  0.95310000   2.94059033
  0.95310000   1.27351514
  0.95310000   2.25869666
  0.95310000   2.65997444
  0.95310000   1.74039074
  0.95310000   2.88066119
  0.95310000   1.33332185
  0.95310000   2.35466362
  0.95310000   2.46661994
  0.95310000   2.20321286
  0.95310000   2.74829634
  0.95310000   1.54954381
  0.95310000   2.67142880
  0.95310000   1.71685265
  0.95310000   2.86029372
  0.95310000   1.36000957
  0.95310000   2.39657596
  0.95310000   2.37272574
  0.95310000   2.42170279
  0.95310000   2.30880014
  0.95310000   2.55704058
  0.95310000   1.98254399
  0.95310000   2.95572077
  0.95320000   1.26095801
  0.95320000   2.23930081
  0.95320000   2.69512766
  0.95320000   1.66205047
  0.95320000   2.80743334
  0.95320000   1.44237396
  0.95320000   2.52281692
  0.95320000   2.07156515
  0.95320000   2.90774810
  0.95320000   1.30224675
  0.95320000   2.30622815
  0.95320000   2.56893750
  0.95320000   1.95534889
  0.95320000   2.96321686
  0.95320000   1.25908687
  0.95320000   2.23622967
  0.95320000   2.70031079
  0.95320000   1.65066439
  0.95320000   2.79511295
  0.95320000   1.46381821
  0.95320000   2.55411487
  0.95320000   1.99512627
  0.95320000   2.95322132
  0.95330000   2.87112460
  0.95330000   1.34598883
  0.95330000   2.37689586
  0.95330000   2.41834753
  0.95330000   2.31840311
  0.95330000   2.53885709
  0.95330000   2.02741744
  0.95330000   2.93859196
  0.95330000   1.27514331
  0.95330000   2.26349411
  0.95330000   2.65219732
  0.95330000   1.75833569
  0.95330000   2.89741376
  0.95330000   1.31418962
  0.95330000   2.32645623
  0.95330000   2.52787848
  0.95330000   2.05527817
  0.95330000   2.92083916
  0.95330000   1.28987223
  0.95330000   2.28737294
  0.95330000   2.60683655
  0.95330000   1.86448967
  0.95330000   2.95597593
  0.95340000   2.82394705
  0.95340000   1.41530350
  0.95340000   2.48484567
  0.95340000   2.16465346
  0.95340000   2.80766963
  0.95340000   1.44040819
  0.95340000   2.52227720
  0.95340000   2.07319410
  0.95340000   2.90825827
  0.95340000   1.30230830
  0.95340000   2.30852139
  0.95340000   2.56537004
  0.95340000   1.96438767
  0.95340000   2.96386709
  0.95340000   1.25954598
  0.95340000   2.23911549
  0.95340000   2.69665192
  0.95340000   1.65890386
  0.95340000   2.80656581
  0.95340000   1.44414929
  0.95340000   2.52779246
  0.95340000   2.05981959
  0.95340000   2.91888750
  0.95350000   2.92836852
  0.95350000   1.28464412
  0.95350000   2.28109306
  0.95350000   2.62043355
  0.95350000   1.83282267
  0.95350000   2.94603211
  0.95350000   1.27102636
  0.95350000   2.25894840
  0.95350000   2.66200371
  0.95350000   1.73635413
  0.95350000   2.88232043
  0.95350000   1.33232431
  0.95350000   2.35755603
  0.95350000   2.46213936
  0.95350000   2.21520985
  0.95350000   2.73202963
  0.95350000   1.58302235
  0.95350000   2.71931691
  0.95350000   1.61250974
  0.95350000   2.75533694
  0.95350000   1.53906585
  0.95350000   2.66254872
  0.95350000   1.73788838
  0.95360000   1.36076896
  0.95360000   2.40346160
  0.95360000   2.35884712
  0.95360000   2.45475438
  0.95360000   2.23235445
  0.95360000   2.70381983
  0.95360000   1.64248723
  0.95360000   2.79104213
  0.95360000   1.47164432
  0.95360000   2.57019261
  0.95360000   1.95683313
  0.95360000   2.96774914
  0.95360000   1.25849679
  0.95360000   2.23953310
  0.95360000   2.69730165
  0.95360000   1.65780971
  0.95360000   2.80791868
  0.95360000   1.44221418
  0.95360000   2.52731561
  0.95360000   2.06148630
  0.95360000   2.91958105
  0.95360000   1.29208881
  0.95360000   2.29423061
  0.95370000   2.68076942
  0.95370000   1.69442806
  0.95370000   2.84677544
  0.95370000   1.38066815
  0.95370000   2.43549949
  0.95370000   2.28420447
  0.95370000   2.61048048
  0.95370000   1.85575985
  0.95370000   2.95777214
  0.95370000   1.26426358
  0.95370000   2.25004562
  0.95370000   2.67934889
  0.95370000   1.69752521
  0.95370000   2.84975427
  0.95370000   1.37627011
  0.95370000   2.42869258
  0.95370000   2.30024985
  0.95370000   2.57872024
  0.95370000   1.93179265
  0.95370000   2.97074531
  0.95370000   1.25743236
  0.95370000   2.23884803
  0.95370000   2.69907408
  0.95380000   2.89848138
  0.95380000   1.31460677
  0.95380000   2.33267134
  0.95380000   2.51745831
  0.95380000   2.08203491
  0.95380000   2.90403697
  0.95380000   1.30772775
  0.95380000   2.32163621
  0.95380000   2.54047899
  0.95380000   2.02576365
  0.95380000   2.94489939
  0.95380000   1.27251502
  0.95380000   2.26460928
  0.95380000   2.65329244
  0.95380000   1.75663801
  0.95380000   2.90239496
  0.95380000   1.31027983
  0.95380000   2.32572349
  0.95380000   2.53200603
  0.95380000   2.04643656
  0.95380000   2.93203921
  0.95380000   1.28202851
  0.95380000   2.28009814
  0.95390000   1.66205693
  0.95390000   2.81629100
  0.95390000   1.42879756
  0.95390000   2.51096260
  0.95390000   2.10236126
  0.95390000   2.88605872
  0.95390000   1.32796772
  0.95390000   2.35511964
  0.95390000   2.46928001
  0.95390000   2.19925412
  0.95390000   2.76035130
  0.95390000   1.52712213
  0.95390000   2.65137004
  0.95390000   1.76396974
  0.95390000   2.90927219
  0.95390000   1.30356600
  0.95390000   2.31603425
  0.95390000   2.55274828
  0.95390000   1.99613788
  0.95390000   2.95999167
  0.95390000   1.26361838
  0.95390000   2.25113601
  0.95390000   2.67861299
  0.95400000   2.18963063
  0.95400000   2.77594712
  0.95400000   1.49777234
  0.95400000   2.61213492
  0.95400000   1.85643093
  0.95400000   2.96192193
  0.95400000   1.26328650
  0.95400000   2.25166790
  0.95400000   2.67844774
  0.95400000   1.70004742
  0.95400000   2.85598359
  0.95400000   1.36811123
  0.95400000   2.41946748
  0.95400000   2.32312851
  0.95400000   2.53345976
  0.95400000   2.04246405
  0.95400000   2.93653107
  0.95400000   1.27919649
  0.95400000   2.27765970
  0.95400000   2.62975727
  0.95400000   1.81154712
  0.95400000   2.94130265
  0.95400000   1.27618726
  0.95410000   2.80319484
  0.95410000   1.44936263
  0.95410000   2.54379814
  0.95410000   2.02228272
  0.95410000   2.95032271
  0.95410000   1.27019222
  0.95410000   2.26405714
  0.95410000   2.65628599
  0.95410000   1.75032450
  0.95410000   2.90126845
  0.95410000   1.31240522
  0.95410000   2.33245964
  0.95410000   2.51934850
  0.95410000   2.07811431
  0.95410000   2.91030246
  0.95410000   1.30231762
  0.95410000   2.31623005
  0.95410000   2.55326133
  0.95410000   1.99525626
  0.95410000   2.96245083
  0.95410000   1.26311610
  0.95410000   2.25245767
  0.95410000   2.67750351
  0.95420000   2.79761972
  0.95420000   1.45920235
  0.95420000   2.55939404
  0.95420000   1.98437862
  0.95420000   2.96776788
  0.95420000   1.26101970
  0.95420000   2.25009844
  0.95420000   2.68254755
  0.95420000   1.69121051
  0.95420000   2.84994602
  0.95420000   1.37715910
  0.95420000   2.43582336
  0.95420000   2.28515673
  0.95420000   2.61153618
  0.95420000   1.85411795
  0.95420000   2.96322660
  0.95420000   1.26331833
  0.95420000   2.25385934
  0.95420000   2.67564924
  0.95420000   1.70652694
  0.95420000   2.86462676
  0.95420000   1.35670390
  0.95420000   2.40391046
  0.95430000   2.09677045
  0.95430000   2.89485528
  0.95430000   1.31899185
  0.95430000   2.34525179
  0.95430000   2.49272880
  0.95430000   2.14356731
  0.95430000   2.84207224
  0.95430000   1.38723511
  0.95430000   2.45254376
  0.95430000   2.24523636
  0.95430000   2.68681580
  0.95430000   1.68093464
  0.95430000   2.84087570
  0.95430000   1.39058115
  0.95430000   2.45769097
  0.95430000   2.23297872
  0.95430000   2.70840092
  0.95430000   1.63399368
  0.95430000   2.79032563
  0.95430000   1.47419929
  0.95430000   2.58229904
  0.95430000   1.92887231
  0.95430000   2.97810070
  0.95440000   1.73361878
  0.95440000   2.89138413
  0.95440000   1.32417818
  0.95440000   2.35466069
  0.95440000   2.47279208
  0.95440000   2.19239003
  0.95440000   2.77472716
  0.95440000   1.50066053
  0.95440000   2.62104645
  0.95440000   1.83589395
  0.95440000   2.95855911
  0.95440000   1.26676605
  0.95440000   2.26166955
  0.95440000   2.66262658
  0.95440000   1.73630835
  0.95440000   2.89362449
  0.95440000   1.32159974
  0.95440000   2.35052864
  0.95440000   2.48177645
  0.95440000   2.17050093
  0.95440000   2.80685256
  0.95440000   1.44337061
  0.95440000   2.53851418
  0.95450000   2.67208395
  0.95450000   1.71511824
  0.95450000   2.87638768
  0.95450000   1.34232707
  0.95450000   2.38465848
  0.95450000   2.40590202
  0.95450000   2.35201810
  0.95450000   2.47320890
  0.95450000   2.19044562
  0.95450000   2.77804651
  0.95450000   1.49447304
  0.95450000   2.61355696
  0.95450000   1.85378885
  0.95450000   2.96698998
  0.95450000   1.26279649
  0.95450000   2.25622564
  0.95450000   2.67327691
  0.95450000   1.71233380
  0.95450000   2.87381246
  0.95450000   1.34549882
  0.95450000   2.38966703
  0.95450000   2.39433053
  0.95450000   2.37871119
  0.95460000   2.85972633
  0.95460000   1.36442284
  0.95460000   2.42058773
  0.95460000   2.32282039
  0.95460000   2.53733317
  0.95460000   2.03451684
  0.95460000   2.94776716
  0.95460000   1.27361154
  0.95460000   2.27504894
  0.95460000   2.63844926
  0.95460000   1.79228861
  0.95460000   2.93738871
  0.95460000   1.28131167
  0.95460000   2.28762534
  0.95460000   2.61407163
  0.95460000   1.84972408
  0.95460000   2.96657221
  0.95460000   1.26340325
  0.95460000   2.25829891
  0.95460000   2.67009170
  0.95460000   1.71966631
  0.95460000   2.88172273
  0.95460000   1.33597880
  0.95470000   2.67632446
  0.95470000   1.70595673
  0.95470000   2.87047212
  0.95470000   1.35037568
  0.95470000   2.39965133
  0.95470000   2.37222070
  0.95470000   2.43005608
  0.95470000   2.29509270
  0.95470000   2.59374599
  0.95470000   1.89721124
  0.95470000   2.98019230
  0.95470000   1.25813783
  0.95470000   2.25070287
  0.95470000   2.68456760
  0.95470000   1.68738793
  0.95470000   2.85248173
  0.95470000   1.37464199
  0.95470000   2.43766573
  0.95470000   2.28245937
  0.95470000   2.61971817
  0.95470000   1.83556362
  0.95470000   2.96182462
  0.95470000   1.26613931
  0.95480000   2.27796191
  0.95480000   2.63414402
  0.95480000   1.80277442
  0.95480000   2.94628590
  0.95480000   1.27583799
  0.95480000   2.28086059
  0.95480000   2.62856637
  0.95480000   1.81586681
  0.95480000   2.95359205
  0.95480000   1.27123380
  0.95480000   2.27331554
  0.95480000   2.64311632
  0.95480000   1.78183011
  0.95480000   2.93310325
  0.95480000   1.28532323
  0.95480000   2.29634816
  0.95480000   2.59786330
  0.95480000   1.88880693
  0.95480000   2.98017232
  0.95480000   1.25868313
  0.95480000   2.25267695
  0.95480000   2.68167757
  0.95480000   1.69399209
  0.95490000   2.37267488
  0.95490000   2.43491221
  0.95490000   2.28518628
  0.95490000   2.61491695
  0.95490000   1.84714998
  0.95490000   2.96910275
  0.95490000   1.26348910
  0.95490000   2.26166857
  0.95490000   2.66571348
  0.95490000   1.73005506
  0.95490000   2.89463674
  0.95490000   1.32193588
  0.95490000   2.35665258
  0.95490000   2.47066146
  0.95490000   2.19902012
  0.95490000   2.76812654
  0.95490000   1.51384394
  0.95490000   2.64548777
  0.95490000   1.77922700
  0.95490000   2.93267204
  0.95490000   1.28603974
  0.95490000   2.29860520
  0.95490000   2.59385528
  0.95500000   2.41901384
  0.95500000   2.32804224
  0.95500000   2.52838040
  0.95500000   2.05741700
  0.95500000   2.93585155
  0.95500000   1.28335308
  0.95500000   2.29532392
  0.95500000   2.60093608
  0.95500000   1.88176223
  0.95500000   2.98109653
  0.95500000   1.25930720
  0.95500000   2.25585380
  0.95500000   2.67714766
  0.95500000   1.70443331
  0.95500000   2.87280856
  0.95500000   1.34809049
  0.95500000   2.39943833
  0.95500000   2.37382364
  0.95500000   2.42767867
  0.95500000   2.30174196
  0.95500000   2.58193549
  0.95500000   1.92621963
  0.95500000   2.98568844
  0.95510000   2.40874871
  0.95510000   2.35259775
  0.95510000   2.47566910
  0.95510000   2.18664406
  0.95510000   2.78852838
  0.95510000   1.47653885
  0.95510000   2.59531839
  0.95510000   1.89875166
  0.95510000   2.98553760
  0.95510000   1.25843972
  0.95510000   2.25549634
  0.95510000   2.67846221
  0.95510000   1.70165844
  0.95510000   2.87145336
  0.95510000   1.35008072
  0.95510000   2.40372335
  0.95510000   2.36424316
  0.95510000   2.44968755
  0.95510000   2.24945616
  0.95510000   2.68353230
  0.95510000   1.68909115
  0.95510000   2.85914203
  0.95510000   1.36616716
  0.95520000   2.39819056
  0.95520000   2.37765723
  0.95520000   2.41998213
  0.95520000   2.32083417
  0.95520000   2.54357368
  0.95520000   2.02022112
  0.95520000   2.96218492
  0.95520000   1.26776695
  0.95520000   2.27194546
  0.95520000   2.64800059
  0.95520000   1.77106098
  0.95520000   2.93066168
  0.95520000   1.28866325
  0.95520000   2.30616739
  0.95520000   2.58012142
  0.95520000   1.93236962
  0.95520000   2.98809448
  0.95520000   1.25815641
  0.95520000   2.25609944
  0.95520000   2.67792062
  0.95520000   1.70297484
  0.95520000   2.87395994
  0.95520000   1.34714255
  0.95530000   2.33290377
  0.95530000   2.52456908
  0.95530000   2.06844956
  0.95530000   2.93014953
  0.95530000   1.28885350
  0.95530000   2.30758676
  0.95530000   2.57769751
  0.95530000   1.93845515
  0.95530000   2.98888663
  0.95530000   1.25844853
  0.95530000   2.25765943
  0.95530000   2.67569981
  0.95530000   1.70814119
  0.95530000   2.88009035
  0.95530000   1.33987688
  0.95530000   2.38980870
  0.95530000   2.39736882
  0.95530000   2.37499097
  0.95530000   2.42551603
  0.95530000   2.30768216
  0.95530000   2.57130044
  0.95530000   1.95256612
  0.95530000   2.98691795
  0.95540000   2.29029762
  0.95540000   2.61340461
  0.95540000   1.85279241
  0.95540000   2.97747946
  0.95540000   1.26244002
  0.95540000   2.26533030
  0.95540000   2.66201804
  0.95540000   1.73930531
  0.95540000   2.90877792
  0.95540000   1.30878004
  0.95540000   2.34104492
  0.95540000   2.50737268
  0.95540000   2.11082649
  0.95540000   2.89014962
  0.95540000   1.32729987
  0.95540000   2.37085632
  0.95540000   2.44094140
  0.95540000   2.27230815
  0.95540000   2.64284334
  0.95540000   1.78222491
  0.95540000   2.94073182
  0.95540000   1.28178739
  0.95540000   2.29711589
  0.95550000   2.64855321
  0.95550000   1.77045244
  0.95550000   2.93405383
  0.95550000   1.28718444
  0.95550000   2.30705137
  0.95550000   2.58004756
  0.95550000   1.93324471
  0.95550000   2.99154190
  0.95550000   1.25883462
  0.95550000   2.26044831
  0.95550000   2.67178289
  0.95550000   1.71728192
  0.95550000   2.89100582
  0.95550000   1.32773175
  0.95550000   2.37267109
  0.95550000   2.43746807
  0.95550000   2.28109135
  0.95550000   2.62642978
  0.95550000   1.82087575
  0.95550000   2.96467309
  0.95550000   1.26812039
  0.95550000   2.27576436
  0.95550000   2.64250239
  0.95560000   2.60579601
  0.95560000   1.87022562
  0.95560000   2.98530005
  0.95560000   1.26085461
  0.95560000   2.26486303
  0.95560000   2.66408713
  0.95560000   1.73487589
  0.95560000   2.90761093
  0.95560000   1.31055737
  0.95560000   2.34614253
  0.95560000   2.49719856
  0.95560000   2.13632627
  0.95560000   2.86214461
  0.95560000   1.36207915
  0.95560000   2.42835840
  0.95560000   2.30771600
  0.95560000   2.57399226
  0.95560000   1.94709220
  0.95560000   2.99121305
  0.95560000   1.25931692
  0.95560000   2.26231271
  0.95560000   2.66878252
  0.95560000   1.72411606
  0.95570000   2.97847357
  0.95570000   1.26350209
  0.95570000   2.27032295
  0.95570000   2.65438508
  0.95570000   1.75730200
  0.95570000   2.92687535
  0.95570000   1.29354903
  0.95570000   2.31963448
  0.95570000   2.55483991
  0.95570000   1.99509621
  0.95570000   2.97975304
  0.95570000   1.26288530
  0.95570000   2.26930078
  0.95570000   2.65620918
  0.95570000   1.75300842
  0.95570000   2.92354446
  0.95570000   1.29628124
  0.95570000   2.32408057
  0.95570000   2.54535627
  0.95570000   2.01827421
  0.95570000   2.96872430
  0.95570000   1.26696823
  0.95570000   2.27603858
  0.95580000   2.64632812
  0.95580000   1.77603602
  0.95580000   2.94172768
  0.95580000   1.28276961
  0.95580000   2.30311133
  0.95580000   2.58978884
  0.95580000   1.91023370
  0.95580000   2.99479458
  0.95580000   1.25971232
  0.95580000   2.26512699
  0.95580000   2.66483147
  0.95580000   1.73349498
  0.95580000   2.90897783
  0.95580000   1.30985599
  0.95580000   2.34723235
  0.95580000   2.49574797
  0.95580000   2.14042232
  0.95580000   2.85868353
  0.95580000   1.36718626
  0.95580000   2.43868094
  0.95580000   2.28365160
  0.95580000   2.62378949
  0.95580000   1.82782054
  0.95590000   2.55275872
  0.95590000   1.99972621
  0.95590000   2.97978023
  0.95590000   1.26377627
  0.95590000   2.27293386
  0.95590000   2.65042671
  0.95590000   1.76665818
  0.95590000   2.93633225
  0.95590000   1.28693691
  0.95590000   2.31102879
  0.95590000   2.57391971
  0.95590000   1.94889918
  0.95590000   2.99456239
  0.95590000   1.26021491
  0.95590000   2.26703476
  0.95590000   2.66176928
  0.95590000   1.74059305
  0.95590000   2.91615178
  0.95590000   1.30344042
  0.95590000   2.33793687
  0.95590000   2.51655729
  0.95590000   2.08952557
  0.95590000   2.91667835
  0.95600000   1.74545026
  0.95600000   2.92140751
  0.95600000   1.29920469
  0.95600000   2.33216596
  0.95600000   2.52967167
  0.95600000   2.05761629
  0.95600000   2.94574046
  0.95600000   1.28039988
  0.95600000   2.30141506
  0.95600000   2.59423982
  0.95600000   1.89978851
  0.95600000   2.99611442
  0.95600000   1.26049999
  0.95600000   2.26858360
  0.95600000   2.65944284
  0.95600000   1.74608407
  0.95600000   2.92187637
  0.95600000   1.29874400
  0.95600000   2.33140605
  0.95600000   2.53120871
  0.95600000   2.05373620
  0.95600000   2.94867096
  0.95600000   1.27855037
  0.95610000   1.82715792
  0.95610000   2.97537694
  0.95610000   1.26644435
  0.95610000   2.27951072
  0.95610000   2.63895453
  0.95610000   1.79374224
  0.95610000   2.95707700
  0.95610000   1.27462671
  0.95610000   2.29300753
  0.95610000   2.61203554
  0.95610000   1.85732341
  0.95610000   2.98756370
  0.95610000   1.26274005
  0.95610000   2.27337544
  0.95610000   2.65084666
  0.95610000   1.76603493
  0.95610000   2.93840087
  0.95610000   1.28620048
  0.95610000   2.31201615
  0.95610000   2.57291542
  0.95610000   1.95173377
  0.95610000   2.99637791
  0.95610000   1.26092299
  0.95620000   1.92505453
  0.95620000   2.99991249
  0.95620000   1.26102364
  0.95620000   2.27161579
  0.95620000   2.65489736
  0.95620000   1.75690802
  0.95620000   2.93288927
  0.95620000   1.29062837
  0.95620000   2.32037104
  0.95620000   2.55590254
  0.95620000   1.99359370
  0.95620000   2.98573618
  0.95620000   1.26354710
  0.95620000   2.27579579
  0.95620000   2.64667855
  0.95620000   1.77581503
  0.95620000   2.94658138
  0.95620000   1.28111554
  0.95620000   2.30476812
  0.95620000   2.58851454
  0.95620000   1.91402678
  0.95620000   2.99965914
  0.95620000   1.26102232
  0.95630000   1.95046650
  0.95630000   2.99891749
  0.95630000   1.26164331
  0.95630000   2.27372405
  0.95630000   2.65140446
  0.95630000   1.76511660
  0.95630000   2.94027413
  0.95630000   1.28568677
  0.95630000   2.31337487
  0.95630000   2.57119555
  0.95630000   1.95639515
  0.95630000   2.99784173
  0.95630000   1.26175111
  0.95630000   2.27389680
  0.95630000   2.65099277
  0.95630000   1.76599741
  0.95630000   2.94089230
  0.95630000   1.28523539
  0.95630000   2.31262912
  0.95630000   2.57270296
  0.95630000   1.95266245
  0.95630000   2.99847983
  0.95630000   1.26165759
  0.95640000   1.93607089
  0.95640000   3.00172385
  0.95640000   1.26187471
  0.95640000   2.27518689
  0.95640000   2.64916200
  0.95640000   1.77046832
  0.95640000   2.94538891
  0.95640000   1.28269584
  0.95640000   2.30956153
  0.95640000   2.57971549
  0.95640000   1.93583981
  0.95640000   3.00169020
  0.95640000   1.26185425
  0.95640000   2.27514642
  0.95640000   2.64916744
  0.95640000   1.77038665
  0.95640000   2.94530740
  0.95640000   1.28271967
  0.95640000   2.30959555
  0.95640000   2.57958828
  0.95640000   1.93609493
  0.95640000   3.00164300
  0.95640000   1.26184518
  0.95650000   1.91202618
  0.95650000   3.00314604
  0.95650000   1.26229784
  0.95650000   2.27696891
  0.95650000   2.64628446
  0.95650000   1.77731048
  0.95650000   2.95141165
  0.95650000   1.27943870
  0.95650000   2.30529956
  0.95650000   2.58912549
  0.95650000   1.91319277
  0.95650000   3.00315675
  0.95650000   1.26227319
  0.95650000   2.27692146
  0.95650000   2.64630337
  0.95650000   1.77719718
  0.95650000   2.95131026
  0.95650000   1.27947050
  0.95650000   2.30534681
  0.95650000   2.58897155
  0.95650000   1.91351172
  0.95650000   3.00314524
  0.95650000   1.26226089
  0.95660000   1.88825170
  0.95660000   3.00157445
  0.95660000   1.26297035
  0.95660000   2.27916717
  0.95660000   2.64256838
  0.95660000   1.78612867
  0.95660000   2.95853116
  0.95660000   1.27598119
  0.95660000   2.30069502
  0.95660000   2.59918664
  0.95660000   1.88907276
  0.95660000   3.00167308
  0.95660000   1.26293769
  0.95660000   2.27910638
  0.95660000   2.64261434
  0.95660000   1.78595228
  0.95660000   2.95839241
  0.95660000   1.27602654
  0.95660000   2.30076479
  0.95660000   2.59898749
  0.95660000   1.88949924
  0.95660000   3.00172166
  0.95660000   1.26292004
  0.95670000   1.86767918
  0.95670000   2.99806737
  0.95670000   1.26387670
  0.95670000   2.28175545
  0.95670000   2.63805032
  0.95670000   1.79685735
  0.95670000   2.96648753
  0.95670000   1.27266940
  0.95670000   2.29631785
  0.95670000   2.60871746
  0.95670000   1.86635410
  0.95670000   2.99764977
  0.95670000   1.26390504
  0.95670000   2.28179607
  0.95670000   2.63789707
  0.95670000   1.79714755
  0.95670000   2.96663690
  0.95670000   1.27258122
  0.95670000   2.29616712
  0.95670000   2.60896994
  0.95670000   1.86569619
  0.95670000   2.99743724
  0.95670000   1.26391877
  0.95680000   1.85203208
  0.95680000   2.99431274
  0.95680000   1.26492504
  0.95680000   2.28458048
  0.95680000   2.63302051
  0.95680000   1.80883590
  0.95680000   2.97464680
  0.95680000   1.26992867
  0.95680000   2.29287335
  0.95680000   2.61629529
  0.95680000   1.84842163
  0.95680000   2.99295951
  0.95680000   1.26512341
  0.95680000   2.28490346
  0.95680000   2.63230370
  0.95680000   1.81045447
  0.95680000   2.97550701
  0.95680000   1.26960826
  0.95680000   2.29233785
  0.95680000   2.61732660
  0.95680000   1.84591111
  0.95680000   2.99198861
  0.95680000   1.26528048
  0.95690000   1.84219140
  0.95690000   2.99181760
  0.95690000   1.26585847
  0.95690000   2.28721549
  0.95690000   2.62832718
  0.95690000   1.82007423
  0.95690000   2.98180672
  0.95690000   1.26814562
  0.95690000   2.29100698
  0.95690000   2.62064644
  0.95690000   1.83824004
  0.95690000   2.99015813
  0.95690000   1.26614608
  0.95690000   2.28768655
  0.95690000   2.62730855
  0.95690000   1.82241325
  0.95690000   2.98294050
  0.95690000   1.26781502
  0.95690000   2.29045386
  0.95690000   2.62171005
  0.95690000   1.83566031
  0.95690000   2.98904028
  0.95690000   1.26635761
  0.95700000   1.83783060
  0.95700000   2.99125622
  0.95700000   1.26646736
  0.95700000   2.28931245
  0.95700000   2.62468106
  0.95700000   1.82887613
  0.95700000   2.98728397
  0.95700000   1.26726002
  0.95700000   2.29062492
  0.95700000   2.62198852
  0.95700000   1.83522602
  0.95700000   2.99010639
  0.95700000   1.26665929
  0.95700000   2.28962469
  0.95700000   2.62397792
  0.95700000   1.83047415
  0.95700000   2.98798792
  0.95700000   1.26708608
  0.95700000   2.29033128
  0.95700000   2.62252744
  0.95700000   1.83389385
  0.95700000   2.98950505
  0.95700000   1.26676363
  0.95710000   1.83777494
  0.95710000   2.99246377
  0.95710000   1.26676189
  0.95710000   2.29088807
  0.95710000   2.62206538
  0.95710000   1.83525722
  0.95710000   2.99136840
  0.95710000   1.26693850
  0.95710000   2.29117776
  0.95710000   2.62143648
  0.95710000   1.83671203
  0.95710000   2.99197546
  0.95710000   1.26682035
  0.95710000   2.29097866
  0.95710000   2.62180853
  0.95710000   1.83579811
  0.95710000   2.99157310
  0.95710000   1.26688311
  0.95710000   2.29108084
  0.95710000   2.62157798
  0.95710000   1.83632339
  0.95710000   2.99178860
  0.95710000   1.26683874
  0.95720000   1.84066827
  0.95720000   2.99488913
  0.95720000   1.26689610
  0.95720000   2.29219774
  0.95720000   2.61997379
  0.95720000   1.84040538
  0.95720000   2.99475904
  0.95720000   1.26690044
  0.95720000   2.29220115
  0.95720000   2.61992438
  0.95720000   1.84048302
  0.95720000   2.99477428
  0.95720000   1.26688795
  0.95720000   2.29217762
  0.95720000   2.61994109
  0.95720000   1.84041369
  0.95720000   2.99473389
  0.95720000   1.26688601
  0.95720000   2.29217228
  0.95720000   2.61992823
  0.95720000   1.84042159
  0.95720000   2.99472768
  0.95720000   1.26688084
  0.95730000   1.84543028
  0.95730000   2.99799580
  0.95730000   1.26702462
  0.95730000   2.29349809
  0.95730000   2.61788851
  0.95730000   1.84554800
  0.95730000   2.99801739
  0.95730000   1.26700848
  0.95730000   2.29346744
  0.95730000   2.61790838
  0.95730000   1.84546054
  0.95730000   2.99796731
  0.95730000   1.26700405
  0.95730000   2.29345730
  0.95730000   2.61789795
  0.95730000   1.84545586
  0.95730000   2.99795317
  0.95730000   1.26699814
  0.95730000   2.29344536
  0.95730000   2.61789856
  0.95730000   1.84543167
  0.95730000   2.99793435
  0.95730000   1.26699437
  0.95740000   1.85143569
  0.95740000   3.00143273
  0.95740000   1.26724106
  0.95740000   2.29494480
  0.95740000   2.61549114
  0.95740000   1.85144544
  0.95740000   3.00141229
  0.95740000   1.26722935
  0.95740000   2.29492150
  0.95740000   2.61549618
  0.95740000   1.85139330
  0.95740000   3.00137696
  0.95740000   1.26722244
  0.95740000   2.29490723
  0.95740000   2.61549426
  0.95740000   1.85136829
  0.95740000   3.00135555
  0.95740000   1.26721685
  0.95740000   2.29489582
  0.95740000   2.61549385
  0.95740000   1.85134653
  0.95740000   3.00133813
  0.95740000   1.26721254
  0.95750000   1.85852419
  0.95750000   3.00503668
  0.95750000   1.26758787
  0.95750000   2.29660857
  0.95750000   2.61263317
  0.95750000   1.85845763
  0.95750000   3.00499108
  0.95750000   1.26757684
  0.95750000   2.29658640
  0.95750000   2.61263605
  0.95750000   1.85841058
  0.95750000   3.00495884
  0.95750000   1.26756890
  0.95750000   2.29657041
  0.95750000   2.61263774
  0.95750000   1.85837689
  0.95750000   3.00493528
  0.95750000   1.26756289
  0.95750000   2.29655830
  0.95750000   2.61263884
  0.95750000   1.85835146
  0.95750000   3.00491724
  0.95750000   1.26755818
  0.95760000   1.86685262
  0.95760000   3.00873297
  0.95760000   1.26808449
  0.95760000   2.29852197
  0.95760000   2.60924204
  0.95760000   1.86676595
  0.95760000   3.00868400
  0.95760000   1.26807226
  0.95760000   2.29849780
  0.95760000   2.60924921
  0.95760000   1.86670851
  0.95760000   3.00865044
  0.95760000   1.26806348
  0.95760000   2.29848040
  0.95760000   2.60925389
  0.95760000   1.86666757
  0.95760000   3.00862595
  0.95760000   1.26805687
  0.95760000   2.29846727
  0.95760000   2.60925716
  0.95760000   1.86663689
  0.95760000   3.00860728
  0.95760000   1.26805170
  0.95770000   1.87656420
  0.95770000   3.01239201
  0.95770000   1.26873658
  0.95770000   2.30069466
  0.95770000   2.60529120
  0.95770000   1.87644389
  0.95770000   3.01233899
  0.95770000   1.26872286
  0.95770000   2.30066799
  0.95770000   2.60530372
  0.95770000   1.87637343
  0.95770000   3.01230480
  0.95770000   1.26871317
  0.95770000   2.30064908
  0.95770000   2.60531167
  0.95770000   1.87632450
  0.95770000   3.01228015
  0.95770000   1.26870591
  0.95770000   2.30063487
  0.95770000   2.60531725
  0.95770000   1.87628817
  0.95770000   3.01226142
  0.95770000   1.26870027
  0.95780000   1.88746253
  0.95780000   3.01576424
  0.95780000   1.26951961
  0.95780000   2.30308619
  0.95780000   2.60085801
  0.95780000   1.88731575
  0.95780000   3.01571269
  0.95780000   1.26950463
  0.95780000   2.30305741
  0.95780000   2.60087510
  0.95780000   1.88723401
  0.95780000   3.01567998
  0.95780000   1.26949421
  0.95780000   2.30303727
  0.95780000   2.60088572
  0.95780000   1.88717846
  0.95780000   3.01565653
  0.95780000   1.26948645
  0.95780000   2.30302222
  0.95780000   2.60089315
  0.95780000   1.88713755
  0.95780000   3.01563874
  0.95780000   1.26948043
  0.95790000   1.89901314
  0.95790000   3.01857560
  0.95790000   1.27037125
  0.95790000   2.30559327
  0.95790000   2.59615316
  0.95790000   1.89888106
  0.95790000   3.01853378
  0.95790000   1.27035623
  0.95790000   2.30556439
  0.95790000   2.59617060
  0.95790000   1.89879816
  0.95790000   3.01850534
  0.95790000   1.27034561
  0.95790000   2.30554389
  0.95790000   2.59618208
  0.95790000   1.89874035
  0.95790000   3.01848460
  0.95790000   1.27033768
  0.95790000   2.30552854
  0.95790000   2.59619021
  0.95790000   1.89869757
  0.95790000   3.01846875
  0.95790000   1.27033153
  0.95800000   1.91063271
  0.95800000   3.02066335
  0.95800000   1.27121720
  0.95800000   2.30809254
  0.95800000   2.59143395
  0.95800000   1.91051968
  0.95800000   3.02062979
  0.95800000   1.27120265
  0.95800000   2.30806442
  0.95800000   2.59144988
  0.95800000   1.91044009
  0.95800000   3.02060611
  0.95800000   1.27119226
  0.95800000   2.30804427
  0.95800000   2.59146071
  0.95800000   1.91038364
  0.95800000   3.02058861
  0.95800000   1.27118447
  0.95800000   2.30802914
  0.95800000   2.59146847
  0.95800000   1.91034163
  0.95800000   3.02057515
  0.95800000   1.27117842
  0.95810000   1.92187273
  0.95810000   3.02200589
  0.95810000   1.27200259
  0.95810000   2.31049283
  0.95810000   2.58689444
  0.95810000   1.92175766
  0.95810000   3.02197848
  0.95810000   1.27198867
  0.95810000   2.31046572
  0.95810000   2.58690833
  0.95810000   1.92168274
  0.95810000   3.02195904
  0.95810000   1.27197871
  0.95810000   2.31044628
  0.95810000   2.58691776
  0.95810000   1.92162951
  0.95810000   3.02194455
  0.95810000   1.27197123
  0.95810000   2.31043165
  0.95810000   2.58692454
  0.95810000   1.92158973
  0.95810000   3.02193333
  0.95810000   1.27196540
  0.95820000   1.93239422
  0.95820000   3.02268586
  0.95820000   1.27270438
  0.95820000   2.31275572
  0.95820000   2.58261986
  0.95820000   1.93238195
  0.95820000   3.02265674
  0.95820000   1.27269005
  0.95820000   2.31272791
  0.95820000   2.58263532
  0.95820000   1.93230293
  0.95820000   3.02264152
  0.95820000   1.27268069
  0.95820000   2.31270945
  0.95820000   2.58264275
  0.95820000   1.93225440
  0.95820000   3.02262943
  0.95820000   1.27267354
  0.95820000   2.31269535
  0.95820000   2.58264847
  0.95820000   1.93221711
  0.95820000   3.02262007
  0.95820000   1.27266796
  0.95830000   1.94241270
  0.95830000   3.02279170
  0.95830000   1.27331799
  0.95830000   2.31487350
  0.95830000   2.57863068
  0.95830000   1.94233629
  0.95830000   3.02277103
  0.95830000   1.27330503
  0.95830000   2.31484794
  0.95830000   2.57864153
  0.95830000   1.94226841
  0.95830000   3.02275831
  0.95830000   1.27329608
  0.95830000   2.31483014
  0.95830000   2.57864765
  0.95830000   1.94222297
  0.95830000   3.02274819
  0.95830000   1.27328925
  0.95830000   2.31481656
  0.95830000   2.57865235
  0.95830000   1.94218807
  0.95830000   3.02274034
  0.95830000   1.27328391
  0.95840000   1.95450924
  0.95840000   3.02189653
  0.95840000   1.27376679
  0.95840000   2.31671899
  0.95840000   2.57520386
  0.95840000   1.95093613
  0.95840000   3.02255382
  0.95840000   1.27386572
  0.95840000   2.31687894
  0.95840000   2.57481726
  0.95840000   1.95184296
  0.95840000   3.02236356
  0.95840000   1.27382701
  0.95840000   2.31681178
  0.95840000   2.57492916
  0.95840000   1.95153788
  0.95840000   3.02240409
  0.95840000   1.27382862
  0.95840000   2.31681219
  0.95840000   2.57490392
  0.95840000   1.95157634
  0.95840000   3.02238416
  0.95840000   1.27382127
  0.95850000   3.01898539
  0.95850000   1.27393387
  0.95850000   2.31810053
  0.95850000   2.57278471
  0.95850000   1.95710179
  0.95850000   3.02245467
  0.95850000   1.27444990
  0.95850000   2.31895115
  0.95850000   2.57089739
  0.95850000   1.96168662
  0.95850000   3.02136037
  0.95850000   1.27426153
  0.95850000   2.31863525
  0.95850000   2.57154042
  0.95850000   1.96007161
  0.95850000   3.02173115
  0.95850000   1.27431556
  0.95850000   2.31872238
  0.95850000   2.57132610
  0.95850000   1.96057256
  0.95850000   3.02159766
  0.95850000   1.27428947
  0.95850000   2.31867719
  0.95860000   2.56915728
  0.95860000   1.96625399
  0.95860000   3.02133369
  0.95860000   1.27486581
  0.95860000   2.32074599
  0.95860000   2.56756462
  0.95860000   1.97011561
  0.95860000   3.02020095
  0.95860000   1.27467974
  0.95860000   2.32043336
  0.95860000   2.56819818
  0.95860000   1.96851650
  0.95860000   3.02064553
  0.95860000   1.27474102
  0.95860000   2.32053217
  0.95860000   2.56795409
  0.95860000   1.96908800
  0.95860000   3.02046398
  0.95860000   1.27470800
  0.95860000   2.32047522
  0.95860000   2.56805374
  0.95860000   1.96882023
  0.95860000   3.02052883
  0.95870000   3.02077995
  0.95870000   1.27537791
  0.95870000   2.32270132
  0.95870000   2.56386707
  0.95870000   1.97945943
  0.95870000   3.01828293
  0.95870000   1.27500127
  0.95870000   2.32207183
  0.95870000   2.56518394
  0.95870000   1.97616754
  0.95870000   3.01938686
  0.95870000   1.27514775
  0.95870000   2.32231163
  0.95870000   2.56462937
  0.95870000   1.97750152
  0.95870000   3.01891793
  0.95870000   1.27507503
  0.95870000   2.32218855
  0.95870000   2.56487028
  0.95870000   1.97688273
  0.95870000   3.01911370
  0.95870000   1.27509835
  0.95870000   2.32222536
  0.95880000   1.27873808
  0.95880000   2.32942022
  0.95880000   2.54965562
  0.95880000   2.01478052
  0.95880000   3.00312720
  0.95880000   1.27466116
  0.95880000   2.32261705
  0.95880000   2.56451447
  0.95880000   1.97803325
  0.95880000   3.01985553
  0.95880000   1.27581113
  0.95880000   2.32451715
  0.95880000   2.56035206
  0.95880000   1.98827465
  0.95880000   3.01598420
  0.95880000   1.27528940
  0.95880000   2.32364902
  0.95880000   2.56221625
  0.95880000   1.98364787
  0.95880000   3.01778790
  0.95880000   1.27550690
  0.95880000   2.32400796
  0.95880000   2.56141465
  0.95890000   2.32600150
  0.95890000   2.55772287
  0.95890000   1.99508339
  0.95890000   3.01420805
  0.95890000   1.27569887
  0.95890000   2.32544050
  0.95890000   2.55889564
  0.95890000   1.99213501
  0.95890000   3.01547631
  0.95890000   1.27582347
  0.95890000   2.32564362
  0.95890000   2.55841452
  0.95890000   1.99328840
  0.95890000   3.01495386
  0.95890000   1.27576004
  0.95890000   2.32553578
  0.95890000   2.55862187
  0.95890000   1.99274891
  0.95890000   3.01517332
  0.95890000   1.27577867
  0.95890000   2.32556464
  0.95890000   2.55853702
  0.95890000   1.99293756
  0.95900000   3.01281096
  0.95900000   1.27615344
  0.95900000   2.32730351
  0.95900000   2.55535632
  0.95900000   2.00113454
  0.95900000   3.01243696
  0.95900000   1.27611097
  0.95900000   2.32722898
  0.95900000   2.55547600
  0.95900000   2.00079692
  0.95900000   3.01257605
  0.95900000   1.27611501
  0.95900000   2.32723263
  0.95900000   2.55543562
  0.95900000   2.00086588
  0.95900000   3.01252390
  0.95900000   1.27610471
  0.95900000   2.32721321
  0.95900000   2.55545331
  0.95900000   2.00079819
  0.95900000   3.01254220
  0.95900000   1.27610167
  0.95900000   2.32720632
  0.95910000   2.25990661
  0.95910000   2.69058957
  0.95910000   1.68032775
  0.95910000   2.90154905
  0.95910000   1.32783571
  0.95910000   2.41359296
  0.95910000   2.35638872
  0.95910000   2.48598549
  0.95910000   2.17313960
  0.95910000   2.83992531
  0.95910000   1.40130213
  0.95910000   2.53059097
  0.95910000   2.06663743
  0.95910000   2.96884459
  0.95910000   1.28240715
  0.95910000   2.33883702
  0.95910000   2.53030158
  0.95910000   2.06352175
  0.95910000   2.97116998
  0.95910000   1.28157693
  0.95910000   2.33745223
  0.95910000   2.53333397
  0.95910000   2.05593589
  0.95920000   2.54881330
  0.95920000   2.01784444
  0.95920000   3.00557842
  0.95920000   1.27689815
  0.95920000   2.33075542
  0.95920000   2.54876716
  0.95920000   2.01790452
  0.95920000   3.00550949
  0.95920000   1.27688604
  0.95920000   2.33073151
  0.95920000   2.54877923
  0.95920000   2.01783601
  0.95920000   3.00552604
  0.95920000   1.27687856
  0.95920000   2.33071625
  0.95920000   2.54878283
  0.95920000   2.01779832
  0.95920000   3.00553032
  0.95920000   1.27687270
  0.95920000   2.33070436
  0.95920000   2.54878594
  0.95920000   2.01776832
  0.95920000   3.00553403
  0.95930000   2.54421381
  0.95930000   2.02950014
  0.95930000   2.99930951
  0.95930000   1.27751195
  0.95930000   2.33288768
  0.95930000   2.54455875
  0.95930000   2.02858758
  0.95930000   2.99987762
  0.95930000   1.27747937
  0.95930000   2.33282917
  0.95930000   2.54464717
  0.95930000   2.02832887
  0.95930000   3.00002291
  0.95930000   1.27746614
  0.95930000   2.33280420
  0.95930000   2.54467213
  0.95930000   2.02823784
  0.95930000   3.00006412
  0.95930000   1.27745844
  0.95930000   2.33278919
  0.95930000   2.54468212
  0.95930000   2.02819063
  0.95930000   3.00008070
  0.95940000   2.34228921
  0.95940000   2.52408009
  0.95940000   2.07982607
  0.95940000   2.95909758
  0.95940000   1.28754601
  0.95940000   2.35071418
  0.95940000   2.50503981
  0.95940000   2.12730784
  0.95940000   2.90610390
  0.95940000   1.32356193
  0.95940000   2.41004214
  0.95940000   2.36587431
  0.95940000   2.46547736
  0.95940000   2.22486953
  0.95940000   2.75674864
  0.95940000   1.54319192
  0.95940000   2.74151894
  0.95940000   1.57603736
  0.95940000   2.78480910
  0.95940000   1.49366244
  0.95940000   2.67262197
  0.95940000   1.72445794
  0.95940000   2.94725155
  0.95950000   1.28794169
  0.95950000   2.35248981
  0.95950000   2.50153332
  0.95950000   2.13638342
  0.95950000   2.89535015
  0.95950000   1.33427712
  0.95950000   2.42863630
  0.95950000   2.32117611
  0.95950000   2.56641594
  0.95950000   1.97401033
  0.95950000   3.02878337
  0.95950000   1.28191076
  0.95950000   2.34240200
  0.95950000   2.52421785
  0.95950000   2.07964202
  0.95950000   2.96016101
  0.95950000   1.28751248
  0.95950000   2.35176366
  0.95950000   2.50305193
  0.95950000   2.13246783
  0.95950000   2.90034594
  0.95950000   1.32928889
  0.95950000   2.42051402
  0.95960000   2.82109690
  0.95960000   1.43101509
  0.95960000   2.58233533
  0.95960000   1.93943290
  0.95960000   3.03834024
  0.95960000   1.28553316
  0.95960000   2.34954457
  0.95960000   2.50869924
  0.95960000   2.11874121
  0.95960000   2.91843530
  0.95960000   1.31363507
  0.95960000   2.39605722
  0.95960000   2.40020109
  0.95960000   2.38564286
  0.95960000   2.41942042
  0.95960000   2.33830126
  0.95960000   2.52795913
  0.95960000   2.06929375
  0.95960000   2.97052783
  0.95960000   1.28408274
  0.95960000   2.34715876
  0.95960000   2.51387996
  0.95960000   2.10563150
  0.95970000   1.44276016
  0.95970000   2.60134273
  0.95970000   1.89306679
  0.95970000   3.03952489
  0.95970000   1.28660278
  0.95970000   2.35243519
  0.95970000   2.50261284
  0.95970000   2.13422302
  0.95970000   2.89986387
  0.95970000   1.33046054
  0.95970000   2.42471549
  0.95970000   2.33144206
  0.95970000   2.54486986
  0.95970000   2.02785766
  0.95970000   3.00427271
  0.95970000   1.27963378
  0.95970000   2.34083958
  0.95970000   2.52868396
  0.95970000   2.06898238
  0.95970000   2.97211464
  0.95970000   1.28414140
  0.95970000   2.34837334
  0.95970000   2.51168875
  0.95980000   1.35870615
  0.95980000   2.47153933
  0.95980000   2.21632043
  0.95980000   2.77561205
  0.95980000   1.50879107
  0.95980000   2.69909352
  0.95980000   1.66600649
  0.95980000   2.89581666
  0.95980000   1.33592726
  0.95980000   2.43475835
  0.95980000   2.30749074
  0.95980000   2.59766642
  0.95980000   1.89807194
  0.95980000   3.04091421
  0.95980000   1.28777360
  0.95980000   2.35548653
  0.95980000   2.49598614
  0.95980000   2.15095567
  0.95980000   2.87802940
  0.95980000   1.35381312
  0.95980000   2.46366172
  0.95980000   2.23574704
  0.95980000   2.74062182
  0.95990000   2.35631472
  0.95990000   2.49474693
  0.95990000   2.15449039
  0.95990000   2.87397670
  0.95990000   1.35887911
  0.95990000   2.47297178
  0.95990000   2.21297170
  0.95990000   2.78209337
  0.95990000   1.49718952
  0.95990000   2.68384852
  0.95990000   1.69982645
  0.95990000   2.93116504
  0.95990000   1.30601637
  0.95990000   2.38690010
  0.95990000   2.42341546
  0.95990000   2.33090554
  0.95990000   2.54638984
  0.95990000   2.02432546
  0.95990000   3.00857831
  0.95990000   1.28095563
  0.95990000   2.34525868
  0.95990000   2.51966751
  0.95990000   2.09198563
  0.96000000   1.30280585
  0.96000000   2.38273274
  0.96000000   2.43357685
  0.96000000   2.30642847
  0.96000000   2.60024854
  0.96000000   1.89192808
  0.96000000   3.04256466
  0.96000000   1.28975859
  0.96000000   2.36101815
  0.96000000   2.48418867
  0.96000000   2.18099059
  0.96000000   2.83502016
  0.96000000   1.41063406
  0.96000000   2.55580424
  0.96000000   2.00584214
  0.96000000   3.02101283
  0.96000000   1.28324339
  0.96000000   2.35018396
  0.96000000   2.50905119
  0.96000000   2.11885083
  0.96000000   2.92177790
  0.96000000   1.31244954
  0.96000000   2.39863061
  0.96010000   2.36444970
  0.96010000   2.47690956
  0.96010000   2.19959123
  0.96010000   2.80574802
  0.96010000   1.45662561
  0.96010000   2.62700983
  0.96010000   1.83184899
  0.96010000   3.02720927
  0.96010000   1.28526095
  0.96010000   2.35465993
  0.96010000   2.49940608
  0.96010000   2.14333090
  0.96010000   2.89111048
  0.96010000   1.34050668
  0.96010000   2.44563771
  0.96010000   2.28145108
  0.96010000   2.65367011
  0.96010000   1.76533317
  0.96010000   2.98854951
  0.96010000   1.28280816
  0.96010000   2.35058366
  0.96010000   2.50866706
  0.96010000   2.12010130
  0.96020000   1.39977840
  0.96020000   2.54130843
  0.96020000   2.04261317
  0.96020000   2.99955698
  0.96020000   1.28248033
  0.96020000   2.35115812
  0.96020000   2.50786747
  0.96020000   2.12243664
  0.96020000   2.91919250
  0.96020000   1.31524132
  0.96020000   2.40549946
  0.96020000   2.37994774
  0.96020000   2.43620478
  0.96020000   2.29979986
  0.96020000   2.61512642
  0.96020000   1.85618505
  0.96020000   3.03708375
  0.96020000   1.28893279
  0.96020000   2.36187451
  0.96020000   2.48307242
  0.96020000   2.18431351
  0.96020000   2.83126286
  0.96020000   1.41662333
  0.96030000   2.57674235
  0.96030000   1.95034010
  0.96030000   3.04412026
  0.96030000   1.29246635
  0.96030000   2.36888207
  0.96030000   2.46732488
  0.96030000   2.22397288
  0.96030000   2.76487258
  0.96030000   1.52945147
  0.96030000   2.73413981
  0.96030000   1.59260557
  0.96030000   2.81726898
  0.96030000   1.44048847
  0.96030000   2.60520717
  0.96030000   1.88499421
  0.96030000   3.04558791
  0.96030000   1.29308792
  0.96030000   2.36991426
  0.96030000   2.46496548
  0.96030000   2.22984847
  0.96030000   2.75422998
  0.96030000   1.54977129
  0.96030000   2.76172806
  0.96040000   2.36840590
  0.96040000   2.46900588
  0.96040000   2.22019541
  0.96040000   2.77238665
  0.96040000   1.51567590
  0.96040000   2.71626329
  0.96040000   1.63001737
  0.96040000   2.86362085
  0.96040000   1.37437976
  0.96040000   2.50359887
  0.96040000   2.13793082
  0.96040000   2.90154061
  0.96040000   1.33133386
  0.96040000   2.43416429
  0.96040000   2.31087529
  0.96040000   2.59357003
  0.96040000   1.90918277
  0.96040000   3.04872194
  0.96040000   1.29523970
  0.96040000   2.37460287
  0.96040000   2.45430327
  0.96040000   2.25656824
  0.96040000   2.70446213
  0.96050000   1.28425652
  0.96050000   2.35746712
  0.96050000   2.49495597
  0.96050000   2.15570877
  0.96050000   2.87717233
  0.96050000   1.35695639
  0.96050000   2.47686882
  0.96050000   2.20505933
  0.96050000   2.80002047
  0.96050000   1.46716754
  0.96050000   2.64758074
  0.96050000   1.78391619
  0.96050000   3.00649298
  0.96050000   1.28438327
  0.96050000   2.35766564
  0.96050000   2.49438178
  0.96050000   2.15703985
  0.96050000   2.87516922
  0.96050000   1.35920744
  0.96050000   2.48048114
  0.96050000   2.19593047
  0.96050000   2.81528842
  0.96050000   1.44208266
  0.96060000   2.36322302
  0.96060000   2.48213848
  0.96060000   2.18811531
  0.96060000   2.82840969
  0.96060000   1.42196310
  0.96060000   2.58052690
  0.96060000   1.94588800
  0.96060000   3.04879168
  0.96060000   1.29668119
  0.96060000   2.37925574
  0.96060000   2.44431719
  0.96060000   2.28204450
  0.96060000   2.65475859
  0.96060000   1.76349035
  0.96060000   2.99358519
  0.96060000   1.28495738
  0.96060000   2.35974031
  0.96060000   2.48995696
  0.96060000   2.16834108
  0.96060000   2.85921414
  0.96060000   1.37892888
  0.96060000   2.51317041
  0.96060000   2.11407840
  0.96070000   2.18071029
  0.96070000   2.84098947
  0.96070000   1.40384093
  0.96070000   2.55361953
  0.96070000   2.01296335
  0.96070000   3.02454250
  0.96070000   1.28836223
  0.96070000   2.36653784
  0.96070000   2.47462909
  0.96070000   2.20702169
  0.96070000   2.79749694
  0.96070000   1.47168317
  0.96070000   2.65669799
  0.96070000   1.76295019
  0.96070000   2.99469472
  0.96070000   1.28549012
  0.96070000   2.36175193
  0.96070000   2.48583593
  0.96070000   2.17900499
  0.96070000   2.84359080
  0.96070000   1.40011997
  0.96070000   2.54778680
  0.96070000   2.02744693
  0.96080000   1.84245633
  0.96080000   3.04028392
  0.96080000   1.29417032
  0.96080000   2.37734068
  0.96080000   2.44986136
  0.96080000   2.26911895
  0.96080000   2.68231193
  0.96080000   1.70127947
  0.96080000   2.94400268
  0.96080000   1.30156277
  0.96080000   2.38967420
  0.96080000   2.42050282
  0.96080000   2.34132354
  0.96080000   2.52753801
  0.96080000   2.07359635
  0.96080000   2.97817893
  0.96080000   1.28798694
  0.96080000   2.36704857
  0.96080000   2.47374175
  0.96080000   2.20943849
  0.96080000   2.79397446
  0.96080000   1.47786003
  0.96080000   2.66699812
  0.96090000   2.66378688
  0.96090000   1.74702192
  0.96090000   2.98524433
  0.96090000   1.28755008
  0.96090000   2.36744385
  0.96090000   2.47356968
  0.96090000   2.21038022
  0.96090000   2.79319663
  0.96090000   1.47949531
  0.96090000   2.67064441
  0.96090000   1.73126663
  0.96090000   2.97236422
  0.96090000   1.29026796
  0.96090000   2.37198538
  0.96090000   2.46287800
  0.96090000   2.23702367
  0.96090000   2.74509869
  0.96090000   1.56875882
  0.96090000   2.79443006
  0.96090000   1.47952612
  0.96090000   2.67071018
  0.96090000   1.73127405
  0.96090000   2.97238454
  0.96100000   2.42034565
  0.96100000   2.34241161
  0.96100000   2.52605004
  0.96100000   2.07784849
  0.96100000   2.97597659
  0.96100000   1.28949083
  0.96100000   2.37180514
  0.96100000   2.46351927
  0.96100000   2.23562533
  0.96100000   2.74831741
  0.96100000   1.56256029
  0.96100000   2.78758769
  0.96100000   1.49168449
  0.96100000   2.68962876
  0.96100000   1.68891553
  0.96100000   2.93477061
  0.96100000   1.30801286
  0.96100000   2.40263774
  0.96100000   2.39020088
  0.96100000   2.41536031
  0.96100000   2.35378998
  0.96100000   2.49974170
  0.96100000   2.14373013
  0.96110000   2.88453743
  0.96110000   1.35081156
  0.96110000   2.47394335
  0.96110000   2.21432464
  0.96110000   2.78837377
  0.96110000   1.48847668
  0.96110000   2.68622230
  0.96110000   1.69657617
  0.96110000   2.94354886
  0.96110000   1.30320375
  0.96110000   2.39579505
  0.96110000   2.40714727
  0.96110000   2.37502165
  0.96110000   2.45104332
  0.96110000   2.26602865
  0.96110000   2.68991640
  0.96110000   1.68469967
  0.96110000   2.93167371
  0.96110000   1.31028527
  0.96110000   2.40752592
  0.96110000   2.37862560
  0.96110000   2.44322681
  0.96110000   2.28560779
  0.96120000   1.59060924
  0.96120000   2.82623466
  0.96120000   1.42847000
  0.96120000   2.59779903
  0.96120000   1.90481699
  0.96120000   3.05848025
  0.96120000   1.30619763
  0.96120000   2.40182886
  0.96120000   2.39283411
  0.96120000   2.40984612
  0.96120000   2.36797484
  0.96120000   2.46772939
  0.96120000   2.22460002
  0.96120000   2.76957282
  0.96120000   1.52216878
  0.96120000   2.73535356
  0.96120000   1.59160167
  0.96120000   2.82752362
  0.96120000   1.42657891
  0.96120000   2.59488540
  0.96120000   1.91190438
  0.96120000   3.05864380
  0.96120000   1.30629763
  0.96130000   1.57397760
  0.96130000   2.80638864
  0.96130000   1.46037579
  0.96130000   2.64735933
  0.96130000   1.78607838
  0.96130000   3.01808873
  0.96130000   1.29061360
  0.96130000   2.37702826
  0.96130000   2.45273409
  0.96130000   2.26361132
  0.96130000   2.69637732
  0.96130000   1.67105403
  0.96130000   2.92034255
  0.96130000   1.31922011
  0.96130000   2.42457569
  0.96130000   2.33776255
  0.96130000   2.53881819
  0.96130000   2.04680818
  0.96130000   3.00673780
  0.96130000   1.28892474
  0.96130000   2.37419970
  0.96130000   2.45915710
  0.96130000   2.24742747
  0.96140000   2.30970000
  0.96140000   2.60061567
  0.96140000   1.89369358
  0.96140000   3.05953350
  0.96140000   1.30829218
  0.96140000   2.40756095
  0.96140000   2.37958188
  0.96140000   2.44221328
  0.96140000   2.28914668
  0.96140000   2.64440329
  0.96140000   1.78886838
  0.96140000   3.02074436
  0.96140000   1.29173388
  0.96140000   2.38000649
  0.96140000   2.44589981
  0.96140000   2.28078710
  0.96140000   2.66202770
  0.96140000   1.74808486
  0.96140000   2.99224598
  0.96140000   1.28938407
  0.96140000   2.37609311
  0.96140000   2.45521282
  0.96140000   2.25762967
  0.96150000   1.35889379
  0.96150000   2.49167635
  0.96150000   2.17101668
  0.96150000   2.86299646
  0.96150000   1.37689272
  0.96150000   2.52057591
  0.96150000   2.09793021
  0.96150000   2.96030381
  0.96150000   1.29675464
  0.96150000   2.38957282
  0.96150000   2.42357048
  0.96150000   2.33638731
  0.96150000   2.54216740
  0.96150000   2.03865433
  0.96150000   3.01503183
  0.96150000   1.29120723
  0.96150000   2.38025787
  0.96150000   2.44565290
  0.96150000   2.28170618
  0.96150000   2.66070312
  0.96150000   1.75129125
  0.96150000   2.99601063
  0.96150000   1.28977320
  0.96160000   1.29027491
  0.96160000   2.37984768
  0.96160000   2.44720089
  0.96160000   2.27832767
  0.96160000   2.66838078
  0.96160000   1.73400068
  0.96160000   2.98349061
  0.96160000   1.29139673
  0.96160000   2.38172084
  0.96160000   2.44279144
  0.96160000   2.28927650
  0.96160000   2.64558283
  0.96160000   1.78660051
  0.96160000   3.02191325
  0.96160000   1.29326192
  0.96160000   2.38481268
  0.96160000   2.43531749
  0.96160000   2.30772288
  0.96160000   2.60613856
  0.96160000   1.88066479
  0.96160000   3.06011103
  0.96160000   1.31009882
  0.96160000   2.41282337
  0.96170000   2.12539345
  0.96170000   2.92839295
  0.96170000   1.31426363
  0.96170000   2.42095848
  0.96170000   2.34799816
  0.96170000   2.51740962
  0.96170000   2.10159223
  0.96170000   2.95726996
  0.96170000   1.29874423
  0.96170000   2.39514278
  0.96170000   2.41086671
  0.96170000   2.36814925
  0.96170000   2.46978067
  0.96170000   2.22111352
  0.96170000   2.77939485
  0.96170000   1.50521266
  0.96170000   2.71773308
  0.96170000   1.62898531
  0.96170000   2.87915988
  0.96170000   1.35962619
  0.96170000   2.49518739
  0.96170000   2.16261244
  0.96170000   2.87726481
  0.96180000   1.46960155
  0.96180000   2.66720280
  0.96180000   1.74061168
  0.96180000   2.99168282
  0.96180000   1.29167774
  0.96180000   2.38444228
  0.96180000   2.43721013
  0.96180000   2.30386178
  0.96180000   2.61568154
  0.96180000   1.85804439
  0.96180000   3.05735835
  0.96180000   1.30983004
  0.96180000   2.41466082
  0.96180000   2.36377368
  0.96180000   2.48122567
  0.96180000   2.19291321
  0.96180000   2.82918571
  0.96180000   1.42349390
  0.96180000   2.59736923
  0.96180000   1.90668918
  0.96180000   3.06556545
  0.96180000   1.31519837
  0.96180000   2.42355790
  0.96190000   2.87763425
  0.96190000   1.36078645
  0.96190000   2.49941783
  0.96190000   2.15239502
  0.96190000   2.89393628
  0.96190000   1.34368665
  0.96190000   2.47165068
  0.96190000   2.22243085
  0.96190000   2.77944166
  0.96190000   1.50587870
  0.96190000   2.72122449
  0.96190000   1.62213267
  0.96190000   2.87374138
  0.96190000   1.36646308
  0.96190000   2.50856976
  0.96190000   2.12942350
  0.96190000   2.92564588
  0.96190000   1.31706299
  0.96190000   2.42788142
  0.96190000   2.33170307
  0.96190000   2.55546827
  0.96190000   2.00654098
  0.96190000   3.04037149
  0.96200000   2.52167418
  0.96200000   2.09655565
  0.96200000   2.96649013
  0.96200000   1.29706856
  0.96200000   2.39574192
  0.96200000   2.41077822
  0.96200000   2.36963046
  0.96200000   2.46772059
  0.96200000   2.22729081
  0.96200000   2.77026145
  0.96200000   1.52248346
  0.96200000   2.74588415
  0.96200000   1.57189417
  0.96200000   2.81262381
  0.96200000   1.45170386
  0.96200000   2.64293383
  0.96200000   1.79764479
  0.96200000   3.03392078
  0.96200000   1.29960423
  0.96200000   2.39992746
  0.96200000   2.40063684
  0.96200000   2.39427149
  0.96200000   2.40886337
  0.96210000   2.25817343
  0.96210000   2.71186465
  0.96210000   1.63895977
  0.96210000   2.89569909
  0.96210000   1.34352422
  0.96210000   2.47370009
  0.96210000   2.21797327
  0.96210000   2.78892027
  0.96210000   1.48952446
  0.96210000   2.70019053
  0.96210000   1.66743398
  0.96210000   2.92705182
  0.96210000   1.31757789
  0.96210000   2.43101905
  0.96210000   2.32482369
  0.96210000   2.57200792
  0.96210000   1.96584849
  0.96210000   3.06040497
  0.96210000   1.31403427
  0.96210000   2.42505900
  0.96210000   2.33925960
  0.96210000   2.53925432
  0.96210000   2.04756353
  0.96220000   2.40376011
  0.96220000   2.38758028
  0.96220000   2.42590560
  0.96220000   2.33220931
  0.96220000   2.55480307
  0.96220000   2.00853335
  0.96220000   3.04233885
  0.96220000   1.30461761
  0.96220000   2.41054924
  0.96220000   2.37532373
  0.96220000   2.45576620
  0.96220000   2.25805791
  0.96220000   2.71272236
  0.96220000   1.63727747
  0.96220000   2.89506388
  0.96220000   1.34444923
  0.96220000   2.47636709
  0.96220000   2.21148815
  0.96220000   2.80112949
  0.96220000   1.46889398
  0.96220000   2.67111182
  0.96220000   1.73239987
  0.96220000   2.99007727
  0.96230000   2.40534976
  0.96230000   2.38409584
  0.96230000   2.43468438
  0.96230000   2.31083800
  0.96230000   2.60289716
  0.96230000   1.88984772
  0.96230000   3.06990454
  0.96230000   1.32211660
  0.96230000   2.44073015
  0.96230000   2.30107267
  0.96230000   2.62505784
  0.96230000   1.83662000
  0.96230000   3.05628132
  0.96230000   1.31278492
  0.96230000   2.42527155
  0.96230000   2.33950599
  0.96230000   2.53970226
  0.96230000   2.04693596
  0.96230000   3.01664503
  0.96230000   1.29642425
  0.96230000   2.39800712
  0.96230000   2.40628242
  0.96230000   2.38160158
  0.96240000   1.29829056
  0.96240000   2.40227005
  0.96240000   2.39640522
  0.96240000   2.40610521
  0.96240000   2.38175989
  0.96240000   2.44035811
  0.96240000   2.29689470
  0.96240000   2.63355394
  0.96240000   1.81619174
  0.96240000   3.04847636
  0.96240000   1.30899435
  0.96240000   2.42011025
  0.96240000   2.35260686
  0.96240000   2.51002235
  0.96240000   2.12199862
  0.96240000   2.93876080
  0.96240000   1.31070874
  0.96240000   2.42303194
  0.96240000   2.34535533
  0.96240000   2.52676201
  0.96240000   2.07973956
  0.96240000   2.98741365
  0.96240000   1.29501962
  0.96250000   1.30600904
  0.96250000   2.41628935
  0.96250000   2.36241757
  0.96250000   2.48763528
  0.96250000   2.17888150
  0.96250000   2.85751303
  0.96250000   1.38633948
  0.96250000   2.54749155
  0.96250000   2.03234820
  0.96250000   3.03054833
  0.96250000   1.30173505
  0.96250000   2.40915971
  0.96250000   2.37997193
  0.96250000   2.44604879
  0.96250000   2.28338708
  0.96250000   2.66288901
  0.96250000   1.74794565
  0.96250000   3.00628591
  0.96250000   1.29594881
  0.96250000   2.39947655
  0.96250000   2.40362573
  0.96250000   2.38892698
  0.96250000   2.42376643
  0.96260000   2.86877145
  0.96260000   1.37449146
  0.96260000   2.52976288
  0.96260000   2.07774144
  0.96260000   2.99221495
  0.96260000   1.29597298
  0.96260000   2.40068211
  0.96260000   2.40121184
  0.96260000   2.39533265
  0.96260000   2.40882123
  0.96260000   2.37569185
  0.96260000   2.45562158
  0.96260000   2.25938206
  0.96260000   2.71246575
  0.96260000   1.63845367
  0.96260000   2.90157898
  0.96260000   1.33968165
  0.96260000   2.47321486
  0.96260000   2.22064403
  0.96260000   2.78753962
  0.96260000   1.49292160
  0.96260000   2.71136150
  0.96260000   1.64415172
  0.96270000   2.78208767
  0.96270000   1.50493303
  0.96270000   2.72996022
  0.96270000   1.60558557
  0.96270000   2.86420435
  0.96270000   1.38025961
  0.96270000   2.54019254
  0.96270000   2.05158100
  0.96270000   3.01753081
  0.96270000   1.29916276
  0.96270000   2.40714201
  0.96270000   2.38577344
  0.96270000   2.43306062
  0.96270000   2.31649745
  0.96270000   2.59262744
  0.96270000   1.91578515
  0.96270000   3.07581218
  0.96270000   1.32988115
  0.96270000   2.45815669
  0.96270000   2.25869090
  0.96270000   2.71546020
  0.96270000   1.63261667
  0.96270000   2.89621979
  0.96280000   2.41096264
  0.96280000   2.37688961
  0.96280000   2.45484396
  0.96280000   2.26248663
  0.96280000   2.70774295
  0.96280000   1.64899899
  0.96280000   2.91604914
  0.96280000   1.32825295
  0.96280000   2.45672504
  0.96280000   2.26290543
  0.96280000   2.70780838
  0.96280000   1.64913861
  0.96280000   2.91623184
  0.96280000   1.32813816
  0.96280000   2.45653620
  0.96280000   2.26338973
  0.96280000   2.70683074
  0.96280000   1.65122390
  0.96280000   2.91853350
  0.96280000   1.32637309
  0.96280000   2.45361669
  0.96280000   2.27071338
  0.96280000   2.69193098
  0.96290000   3.03746635
  0.96290000   1.30708721
  0.96290000   2.42266416
  0.96290000   2.34840501
  0.96290000   2.52234451
  0.96290000   2.09234178
  0.96290000   2.97879957
  0.96290000   1.29872993
  0.96290000   2.40870319
  0.96290000   2.38262780
  0.96290000   2.44141466
  0.96290000   2.29635436
  0.96290000   2.63769639
  0.96290000   1.80737859
  0.96290000   3.05034735
  0.96290000   1.31358079
  0.96290000   2.43346230
  0.96290000   2.32130854
  0.96290000   2.58385377
  0.96290000   1.93809309
  0.96290000   3.07607851
  0.96290000   1.33169913
  0.96290000   2.46346942
  0.96300000   3.01085521
  0.96300000   1.29966920
  0.96300000   2.41141005
  0.96300000   2.37652836
  0.96300000   2.45658391
  0.96300000   2.25878962
  0.96300000   2.71643612
  0.96300000   1.63093550
  0.96300000   2.89816650
  0.96300000   1.34428832
  0.96300000   2.48543539
  0.96300000   2.19098673
  0.96300000   2.84235514
  0.96300000   1.40796721
  0.96300000   2.58771828
  0.96300000   1.93301483
  0.96300000   3.07843864
  0.96300000   1.33443501
  0.96300000   2.46914948
  0.96300000   2.23202841
  0.96300000   2.76919014
  0.96300000   1.52668320
  0.96300000   2.76441278
  0.96310000   2.71260631
  0.96310000   1.63946592
  0.96310000   2.90928505
  0.96310000   1.33487299
  0.96310000   2.47113073
  0.96310000   2.22756528
  0.96310000   2.77836561
  0.96310000   1.51025947
  0.96310000   2.74256744
  0.96310000   1.58060992
  0.96310000   2.83802308
  0.96310000   1.41595353
  0.96310000   2.60145626
  0.96310000   1.89959615
  0.96310000   3.08087496
  0.96310000   1.33729580
  0.96310000   2.47502449
  0.96310000   2.21751794
  0.96310000   2.79671157
  0.96310000   1.47825364
  0.96310000   2.69615444
  0.96310000   1.67793293
  0.96310000   2.95094667
  0.96320000   2.80765615
  0.96320000   1.46047022
  0.96320000   2.67092504
  0.96320000   1.73463954
  0.96320000   3.00491451
  0.96320000   1.30000917
  0.96320000   2.41424705
  0.96320000   2.37033730
  0.96320000   2.47221549
  0.96320000   2.22001403
  0.96320000   2.79206929
  0.96320000   1.48615148
  0.96320000   2.70899915
  0.96320000   1.65020970
  0.96320000   2.92271274
  0.96320000   1.32498006
  0.96320000   2.45593285
  0.96320000   2.26624987
  0.96320000   2.70353727
  0.96320000   1.65901072
  0.96320000   2.93223339
  0.96320000   1.31859853
  0.96320000   2.44532994
  0.96330000   2.41641494
  0.96330000   2.36531386
  0.96330000   2.48459219
  0.96330000   2.18903950
  0.96330000   2.84707634
  0.96330000   1.40219147
  0.96330000   2.58223385
  0.96330000   1.94718604
  0.96330000   3.07942612
  0.96330000   1.33770420
  0.96330000   2.47802268
  0.96330000   2.21048823
  0.96330000   2.81075402
  0.96330000   1.45566710
  0.96330000   2.66491327
  0.96330000   1.74850760
  0.96330000   3.01729609
  0.96330000   1.30280256
  0.96330000   2.42005695
  0.96330000   2.35625521
  0.96330000   2.50585286
  0.96330000   2.13506702
  0.96330000   2.92928194
  0.96340000   2.73767264
  0.96340000   1.58830610
  0.96340000   2.85164023
  0.96340000   1.39804802
  0.96340000   2.57689976
  0.96340000   1.96093062
  0.96340000   3.07708165
  0.96340000   1.33649963
  0.96340000   2.47720894
  0.96340000   2.21289693
  0.96340000   2.80719431
  0.96340000   1.46163135
  0.96340000   2.67513850
  0.96340000   1.72535437
  0.96340000   2.99964421
  0.96340000   1.30071081
  0.96340000   2.41769927
  0.96340000   2.36250914
  0.96340000   2.49162645
  0.96340000   2.17143732
  0.96340000   2.87640987
  0.96340000   1.36662704
  0.96340000   2.52652298
  0.96350000   3.07821345
  0.96350000   1.33814316
  0.96350000   2.48108495
  0.96350000   2.20342259
  0.96350000   2.82475302
  0.96350000   1.43455248
  0.96350000   2.63517298
  0.96350000   1.81857543
  0.96350000   3.06386324
  0.96350000   1.32673812
  0.96350000   2.46223847
  0.96350000   2.25116564
  0.96350000   2.73564063
  0.96350000   1.59253114
  0.96350000   2.85824636
  0.96350000   1.38979631
  0.96350000   2.56496993
  0.96350000   1.99091319
  0.96350000   3.06636882
  0.96350000   1.32875007
  0.96350000   2.46556702
  0.96350000   2.24264933
  0.96350000   2.75225258
  0.96360000   2.52557209
  0.96360000   2.09062188
  0.96360000   2.98791285
  0.96360000   1.30166597
  0.96360000   2.42159942
  0.96360000   2.35351498
  0.96360000   2.51370978
  0.96360000   2.11600099
  0.96360000   2.95707197
  0.96360000   1.30777660
  0.96360000   2.43185373
  0.96360000   2.32782754
  0.96360000   2.57284450
  0.96360000   1.96695277
  0.96360000   3.07684149
  0.96360000   1.33793613
  0.96360000   2.48189020
  0.96360000   2.20145081
  0.96360000   2.82877849
  0.96360000   1.42874777
  0.96360000   2.62741613
  0.96360000   1.83721707
  0.96360000   3.07303316
  0.96370000   2.85022107
  0.96370000   1.39935231
  0.96370000   2.58257926
  0.96370000   1.94727235
  0.96370000   3.08404144
  0.96370000   1.34509101
  0.96370000   2.49484248
  0.96370000   2.16894907
  0.96370000   2.88348923
  0.96370000   1.36019965
  0.96370000   2.51964824
  0.96370000   2.10584322
  0.96370000   2.97117663
  0.96370000   1.30433995
  0.96370000   2.42723318
  0.96370000   2.33978727
  0.96370000   2.54603190
  0.96370000   2.03441633
  0.96370000   3.04077756
  0.96370000   1.31426474
  0.96370000   2.44379406
  0.96370000   2.29815834
  0.96370000   2.63917126
  0.96380000   2.73936935
  0.96380000   1.58838770
  0.96380000   2.85699815
  0.96380000   1.39243866
  0.96380000   2.57280632
  0.96380000   1.97209498
  0.96380000   3.07784615
  0.96380000   1.34036972
  0.96380000   2.48825368
  0.96380000   2.18603711
  0.96380000   2.85665021
  0.96380000   1.39135153
  0.96380000   2.57105134
  0.96380000   1.97619202
  0.96380000   3.07615235
  0.96380000   1.33892280
  0.96380000   2.48586064
  0.96380000   2.19204512
  0.96380000   2.84649356
  0.96380000   1.40447608
  0.96380000   2.59188096
  0.96380000   1.92430527
  0.96380000   3.08872593
  0.96390000   2.60266573
  0.96390000   1.89409926
  0.96390000   3.08974715
  0.96390000   1.35216631
  0.96390000   2.50878369
  0.96390000   2.13396478
  0.96390000   2.93666531
  0.96390000   1.31847546
  0.96390000   2.45319729
  0.96390000   2.27528407
  0.96390000   2.68912708
  0.96390000   1.69166060
  0.96390000   2.97497785
  0.96390000   1.30482918
  0.96390000   2.43033115
  0.96390000   2.33285488
  0.96390000   2.56298657
  0.96390000   1.99228224
  0.96390000   3.06949737
  0.96390000   1.33428632
  0.96390000   2.47936387
  0.96390000   2.20876053
  0.96390000   2.81807277
  0.96400000   2.63140119
  0.96400000   1.82480632
  0.96400000   3.07275818
  0.96400000   1.33751580
  0.96400000   2.48587634
  0.96400000   2.19263786
  0.96400000   2.84702732
  0.96400000   1.40434435
  0.96400000   2.59409783
  0.96400000   1.91927138
  0.96400000   3.09148482
  0.96400000   1.35473628
  0.96400000   2.51416329
  0.96400000   2.12051613
  0.96400000   2.95547508
  0.96400000   1.31033287
  0.96400000   2.44072411
  0.96400000   2.30702401
  0.96400000   2.62151926
  0.96400000   1.84835940
  0.96400000   3.08165349
  0.96400000   1.34526435
  0.96400000   2.49862712
  0.96410000   2.49350253
  0.96410000   2.17374603
  0.96410000   2.87917282
  0.96410000   1.36611645
  0.96410000   2.53401289
  0.96410000   2.07040752
  0.96410000   3.01387889
  0.96410000   1.30706175
  0.96410000   2.43635790
  0.96410000   2.31839335
  0.96410000   2.59679432
  0.96410000   1.90876290
  0.96410000   3.09263223
  0.96410000   1.35677490
  0.96410000   2.51866532
  0.96410000   2.10923153
  0.96410000   2.97058545
  0.96410000   1.30649956
  0.96410000   2.43543108
  0.96410000   2.32064608
  0.96410000   2.59166175
  0.96410000   1.92134010
  0.96410000   3.09208747
  0.96420000   2.89784652
  0.96420000   1.34800321
  0.96420000   2.50559674
  0.96420000   2.14301027
  0.96420000   2.92658661
  0.96420000   1.32576597
  0.96420000   2.46881845
  0.96420000   2.23669083
  0.96420000   2.76849886
  0.96420000   1.53041484
  0.96420000   2.78488050
  0.96420000   1.50311893
  0.96420000   2.74626635
  0.96420000   1.57545449
  0.96420000   2.84556081
  0.96420000   1.40847775
  0.96420000   2.60306703
  0.96420000   1.89781117
  0.96420000   3.09397478
  0.96420000   1.35893164
  0.96420000   2.52337878
  0.96420000   2.09758419
  0.96420000   2.98547632
  0.96430000   3.07475027
  0.96430000   1.34173769
  0.96430000   2.49636052
  0.96430000   2.16680728
  0.96430000   2.89165800
  0.96430000   1.35410228
  0.96430000   2.51677639
  0.96430000   2.11473932
  0.96430000   2.96560703
  0.96430000   1.30870043
  0.96430000   2.44143086
  0.96430000   2.30632273
  0.96430000   2.62475060
  0.96430000   1.84120113
  0.96430000   3.08299022
  0.96430000   1.34894419
  0.96430000   2.50820014
  0.96430000   2.13646950
  0.96430000   2.93656234
  0.96430000   1.32025162
  0.96430000   2.46077368
  0.96430000   2.25733770
  0.96430000   2.72836609
  0.96440000   2.61415776
  0.96440000   1.86706864
  0.96440000   3.09174974
  0.96440000   1.35835443
  0.96440000   2.52480106
  0.96440000   2.09446026
  0.96440000   2.99094150
  0.96440000   1.30608043
  0.96440000   2.43815992
  0.96440000   2.31488367
  0.96440000   2.60623893
  0.96440000   1.88621775
  0.96440000   3.09495040
  0.96440000   1.36169997
  0.96440000   2.53025015
  0.96440000   2.08049635
  0.96440000   3.00628004
  0.96440000   1.30737932
  0.96440000   2.44032749
  0.96440000   2.30935604
  0.96440000   2.61850411
  0.96440000   1.85637574
  0.96440000   3.08900818
  0.96450000   2.45732718
  0.96450000   2.26685002
  0.96450000   2.71032574
  0.96450000   1.64683231
  0.96450000   2.93582143
  0.96450000   1.32208142
  0.96450000   2.46614708
  0.96450000   2.24454123
  0.96450000   2.75527463
  0.96450000   1.55588096
  0.96450000   2.82352065
  0.96450000   1.44058381
  0.96450000   2.65676387
  0.96450000   1.76967831
  0.96450000   3.04828937
  0.96450000   1.32388192
  0.96450000   2.46908730
  0.96450000   2.23696452
  0.96450000   2.76996824
  0.96450000   1.52830384
  0.96450000   2.78575945
  0.96450000   1.50218944
  0.96450000   2.74871285
  0.96460000   3.04415410
  0.96460000   1.32242229
  0.96460000   2.46782079
  0.96460000   2.24046135
  0.96460000   2.76386384
  0.96460000   1.53982506
  0.96460000   2.80300418
  0.96460000   1.47314876
  0.96460000   2.70735201
  0.96460000   1.65646441
  0.96460000   2.94787302
  0.96460000   1.31665565
  0.96460000   2.45823249
  0.96460000   2.26501160
  0.96460000   2.71476527
  0.96460000   1.63761808
  0.96460000   2.92671105
  0.96460000   1.32793224
  0.96460000   2.47705813
  0.96460000   2.21702465
  0.96460000   2.80825914
  0.96460000   1.46271491
  0.96460000   2.69168042
  0.96470000   2.50010543
  0.96470000   2.15837610
  0.96470000   2.90794600
  0.96470000   1.34121254
  0.96470000   2.50026947
  0.96470000   2.15795575
  0.96470000   2.90858746
  0.96470000   1.34069456
  0.96470000   2.49941104
  0.96470000   2.16013237
  0.96470000   2.90523468
  0.96470000   1.34341182
  0.96470000   2.50389868
  0.96470000   2.14864501
  0.96470000   2.92252645
  0.96470000   1.33046118
  0.96470000   2.48243500
  0.96470000   2.20346409
  0.96470000   2.83339078
  0.96470000   1.42496985
  0.96470000   2.63501479
  0.96470000   1.82109719
  0.96470000   3.08016692
  0.96480000   2.86971301
  0.96480000   1.37996901
  0.96480000   2.56479540
  0.96480000   1.99430918
  0.96480000   3.07886166
  0.96480000   1.34940006
  0.96480000   2.51485458
  0.96480000   2.12090940
  0.96480000   2.96205162
  0.96480000   1.31215291
  0.96480000   2.45298202
  0.96480000   2.27878606
  0.96480000   2.68715344
  0.96480000   1.69762739
  0.96480000   2.99249829
  0.96480000   1.30844376
  0.96480000   2.44671996
  0.96480000   2.29470489
  0.96480000   2.65300352
  0.96480000   1.77527142
  0.96480000   3.05565609
  0.96480000   1.33078392
  0.96480000   2.48405258
  0.96490000   2.48066114
  0.96490000   2.20865078
  0.96490000   2.82563920
  0.96490000   1.43676224
  0.96490000   2.65579410
  0.96490000   1.77251314
  0.96490000   3.05535444
  0.96490000   1.33131474
  0.96490000   2.48611590
  0.96490000   2.19473188
  0.96490000   2.85020248
  0.96490000   1.40273283
  0.96490000   2.60244733
  0.96490000   1.90048661
  0.96490000   3.10245104
  0.96490000   1.37420910
  0.96490000   2.55654340
  0.96490000   2.01503006
  0.96490000   3.06755102
  0.96490000   1.34056386
  0.96490000   2.50144309
  0.96490000   2.15535965
  0.96490000   2.91406139
  0.96500000   2.69125934
  0.96500000   1.68902192
  0.96500000   2.98678421
  0.96500000   1.30960443
  0.96500000   2.45098703
  0.96500000   2.28464207
  0.96500000   2.67594755
  0.96500000   1.72309040
  0.96500000   3.01835241
  0.96500000   1.31389398
  0.96500000   2.45817480
  0.96500000   2.26629603
  0.96500000   2.71450291
  0.96500000   1.63885177
  0.96500000   2.93333444
  0.96500000   1.32562849
  0.96500000   2.47786620
  0.96500000   2.21614708
  0.96500000   2.81268671
  0.96500000   1.45666380
  0.96500000   2.68750796
  0.96500000   1.70036062
  0.96500000   2.99785998
  0.96510000   2.68829663
  0.96510000   1.69572858
  0.96510000   2.99462668
  0.96510000   1.31028616
  0.96510000   2.45328188
  0.96510000   2.27913256
  0.96510000   2.68827155
  0.96510000   1.69573732
  0.96510000   2.99461966
  0.96510000   1.31027600
  0.96510000   2.45326023
  0.96510000   2.27914528
  0.96510000   2.68820657
  0.96510000   1.69584889
  0.96510000   2.99471639
  0.96510000   1.31027463
  0.96510000   2.45325463
  0.96510000   2.27912929
  0.96510000   2.68821317
  0.96510000   1.69581099
  0.96510000   2.99467209
  0.96510000   1.31026703
  0.96510000   2.45323947
  0.96520000   2.79690298
  0.96520000   1.48271571
  0.96520000   2.72907369
  0.96520000   1.61180889
  0.96520000   2.90423187
  0.96520000   1.34706109
  0.96520000   2.51581289
  0.96520000   2.11976747
  0.96520000   2.96719420
  0.96520000   1.31293680
  0.96520000   2.45891676
  0.96520000   2.26504188
  0.96520000   2.71834494
  0.96520000   1.63117394
  0.96520000   2.92711969
  0.96520000   1.33019015
  0.96520000   2.48780860
  0.96520000   2.19132772
  0.96520000   2.85833352
  0.96520000   1.39338737
  0.96520000   2.59117025
  0.96520000   1.92894291
  0.96520000   3.10463948
  0.96530000   2.56404504
  0.96530000   1.99707820
  0.96530000   3.08272148
  0.96530000   1.35713655
  0.96530000   2.53347492
  0.96530000   2.07460970
  0.96530000   3.02112820
  0.96530000   1.31685586
  0.96530000   2.46662114
  0.96530000   2.24564753
  0.96530000   2.75822410
  0.96530000   1.55179444
  0.96530000   2.82830250
  0.96530000   1.43549255
  0.96530000   2.65876873
  0.96530000   1.76642450
  0.96530000   3.05636683
  0.96530000   1.33501083
  0.96530000   2.49693372
  0.96530000   2.16815865
  0.96530000   2.89745167
  0.96530000   1.35230110
  0.96530000   2.52561948
  0.96540000   2.56098644
  0.96540000   2.00500567
  0.96540000   3.07923119
  0.96540000   1.35467868
  0.96540000   2.53062363
  0.96540000   2.08212784
  0.96540000   3.01409130
  0.96540000   1.31534253
  0.96540000   2.46524098
  0.96540000   2.24948492
  0.96540000   2.75122267
  0.96540000   1.56537792
  0.96540000   2.84776832
  0.96540000   1.40872059
  0.96540000   2.61803219
  0.96540000   1.86349434
  0.96540000   3.10357578
  0.96540000   1.37987460
  0.96540000   2.57171025
  0.96540000   1.97792216
  0.96540000   3.09315472
  0.96540000   1.36851015
  0.96550000   2.74551970
  0.96550000   1.57679054
  0.96550000   2.86405432
  0.96550000   1.38873629
  0.96550000   2.58734370
  0.96550000   1.93931743
  0.96550000   3.10651992
  0.96550000   1.38434200
  0.96550000   2.58013677
  0.96550000   1.95703853
  0.96550000   3.10198632
  0.96550000   1.37909957
  0.96550000   2.57165635
  0.96550000   1.97824881
  0.96550000   3.09412090
  0.96550000   1.37040774
  0.96550000   2.55753977
  0.96550000   2.01383479
  0.96550000   3.07466672
  0.96550000   1.35136301
  0.96550000   2.52634059
  0.96550000   2.09323546
  0.96560000   3.10904206
  0.96560000   1.38826795
  0.96560000   2.58767015
  0.96560000   1.93845235
  0.96560000   3.10776591
  0.96560000   1.38674846
  0.96560000   2.58521691
  0.96560000   1.94452130
  0.96560000   3.10645793
  0.96560000   1.38520024
  0.96560000   2.58271676
  0.96560000   1.95073100
  0.96560000   3.10489711
  0.96560000   1.38336841
  0.96560000   2.57975713
  0.96560000   1.95810823
  0.96560000   3.10274599
  0.96560000   1.38087540
  0.96560000   2.57572522
  0.96560000   1.96819333
  0.96560000   3.09927453
  0.96560000   1.37693539
  0.96570000   2.56430371
  0.96570000   1.99729619
  0.96570000   3.08692649
  0.96570000   1.36464389
  0.96570000   2.55053117
  0.96570000   2.03213502
  0.96570000   3.06367315
  0.96570000   1.34376996
  0.96570000   2.51616657
  0.96570000   2.11985275
  0.96570000   2.97133849
  0.96570000   1.31473615
  0.96570000   2.46771838
  0.96570000   2.24408854
  0.96570000   2.76392838
  0.96570000   1.54189050
  0.96570000   2.81994642
  0.96570000   1.44895131
  0.96570000   2.68446677
  0.96570000   1.70854125
  0.96570000   3.01467924
  0.96570000   1.31734587
  0.96580000   2.81911076
  0.96580000   1.45055206
  0.96580000   2.68818067
  0.96580000   1.70053545
  0.96580000   3.00855239
  0.96580000   1.31646383
  0.96580000   2.47177328
  0.96580000   2.23423622
  0.96580000   2.78406233
  0.96580000   1.50590397
  0.96580000   2.77053533
  0.96580000   1.53225683
  0.96580000   2.80795960
  0.96580000   1.46805297
  0.96580000   2.71475521
  0.96580000   1.64287845
  0.96580000   2.94851269
  0.96580000   1.32201830
  0.96580000   2.48113613
  0.96580000   2.21025865
  0.96580000   2.82923627
  0.96580000   1.43385957
  0.96580000   2.66239662
  0.96590000   2.60450298
  0.96590000   1.89738680
  0.96590000   3.11436991
  0.96590000   1.39758441
  0.96590000   2.60625229
  0.96590000   1.89304889
  0.96590000   3.11411111
  0.96590000   1.39725377
  0.96590000   2.60571858
  0.96590000   1.89433171
  0.96590000   3.11417709
  0.96590000   1.39734377
  0.96590000   2.60585912
  0.96590000   1.89396199
  0.96590000   3.11414197
  0.96590000   1.39730191
  0.96590000   2.60578930
  0.96590000   1.89411474
  0.96590000   3.11414139
  0.96590000   1.39730407
  0.96590000   2.60579049
  0.96590000   1.89409628
  0.96600000   2.69472113
  0.96600000   1.68652542
  0.96600000   2.99759474
  0.96600000   1.31589644
  0.96600000   2.47314963
  0.96600000   2.23137410
  0.96600000   2.79099560
  0.96600000   1.49445276
  0.96600000   2.75644162
  0.96600000   1.55906389
  0.96600000   2.84719484
  0.96600000   1.41134716
  0.96600000   2.62953564
  0.96600000   1.83691698
  0.96600000   3.10311743
  0.96600000   1.38466162
  0.96600000   2.58668227
  0.96600000   1.94175522
  0.96600000   3.11171312
  0.96600000   1.39525229
  0.96600000   2.60372230
  0.96600000   1.89941290
  0.96600000   3.11559823
  0.96610000   2.71852989
  0.96610000   1.63535387
  0.96610000   2.94386031
  0.96610000   1.32538906
  0.96610000   2.49029602
  0.96610000   2.18766968
  0.96610000   2.87150398
  0.96610000   1.38094400
  0.96610000   2.58198719
  0.96610000   1.95376910
  0.96610000   3.10984450
  0.96610000   1.39386554
  0.96610000   2.60271604
  0.96610000   1.90213129
  0.96610000   3.11688140
  0.96610000   1.40269055
  0.96610000   2.61683810
  0.96610000   1.86748535
  0.96610000   3.11302714
  0.96610000   1.39769988
  0.96610000   2.60885741
  0.96610000   1.88698466
  0.96610000   3.11599855
  0.96620000   2.56777943
  0.96620000   1.98973028
  0.96620000   3.09647238
  0.96620000   1.37910440
  0.96620000   2.58009334
  0.96620000   1.95863144
  0.96620000   3.10945395
  0.96620000   1.39431699
  0.96620000   2.60465320
  0.96620000   1.89754769
  0.96620000   3.11796332
  0.96620000   1.40503237
  0.96620000   2.62179248
  0.96620000   1.85564298
  0.96620000   3.11146295
  0.96620000   1.39663780
  0.96620000   2.60837240
[truncated: 189,879 more chars]
